# Supplementary material for: Genome Profiling of SARS-CoV-2 in Indonesia, ASEAN and the Neighbouring East Asian Countries: Features, Challenges and Achievements
Source: MDPI journal article supplement (doi:10.3390/v14040778), 2022-04-08

## Supplementary Figure Legends

**Figure S1.** COVID-19 test rates of ASEAN, East Asian countries, and the United Kingdom per 1 October 2021

**Figure S2.** COVID-19 cases and SARS-CoV-2 sequencing rate in ASEAN and East Asia region. A-B) Indonesia currently holds the highest number of positive cases, followed by the Philippines. C-D) Hong Kong has the highest sequencing rate at over 40% of its positive cases.

**Figure S3.** Proportion of sample sources used for sequencing; Indonesia obtained most of its sequencing samples from swab while the UK did not provide this information to GISAID.

**Figure S4.** Proportion of PANGO lineages pre- and during Delta outbreak in Indonesia for the world (a) and Asia (b).

**Figure S5.** Proportions of Indonesian-associated variants in Indonesia, ASEAN, Asia and worldwide pre-Delta outbreak (a) and during the outbreak (b).

**Figure S6.** Venn diagrams showing the shared and unique total mutations of Indonesian variants versus Delta lineages (a) and compared to just the spike protein mutation (b).

**Figure S7.** Data of genomes imported into Indonesia per 1 October 2021; most cases came from Malaysia followed by non-specific category where only travel history was mentioned but no recorded location/country.

**Figure S8** Circular plot showing inter-nation transmissions of variants in the world per 1 February 2021; transmission events were the highest in Japan.

Figure S1

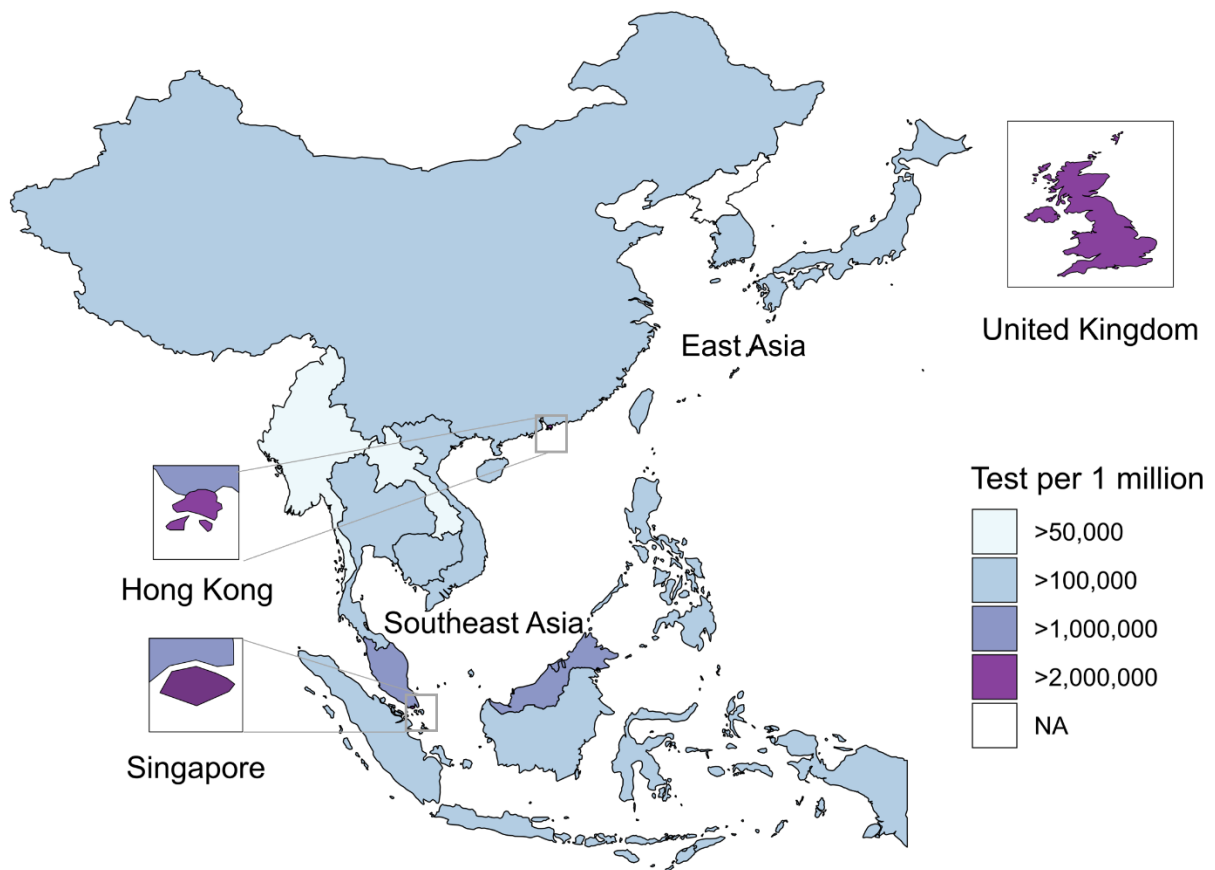

**Figure S2**

**a.** Number of Cases (per 30/10/2021)

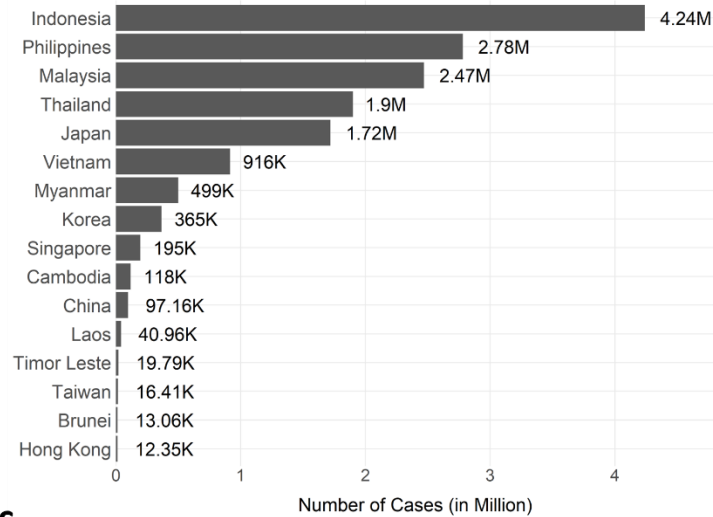

**b.** Number of Cases per 1 June 2021

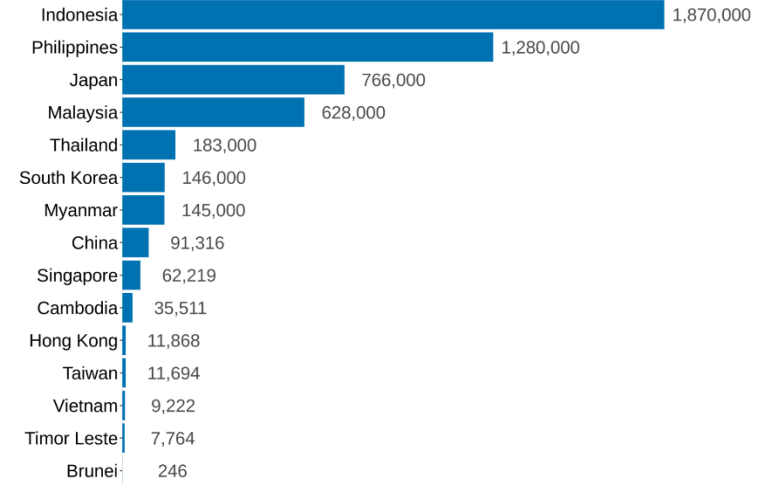

**c.** Sequencing Rate by Cases (per 1/10/2021)

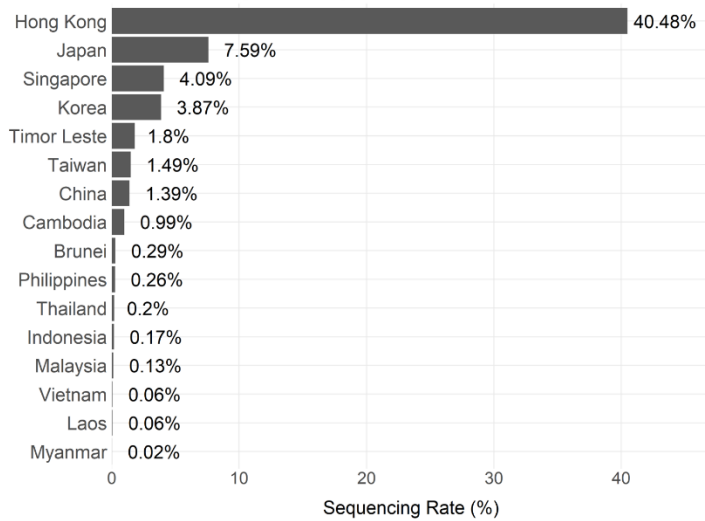

**d.** Sequencing Rate per 1 June 2021

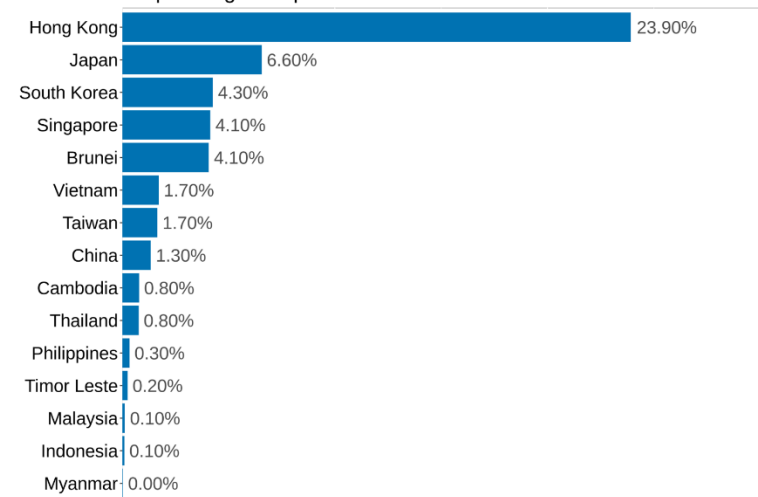

**Figure S3**

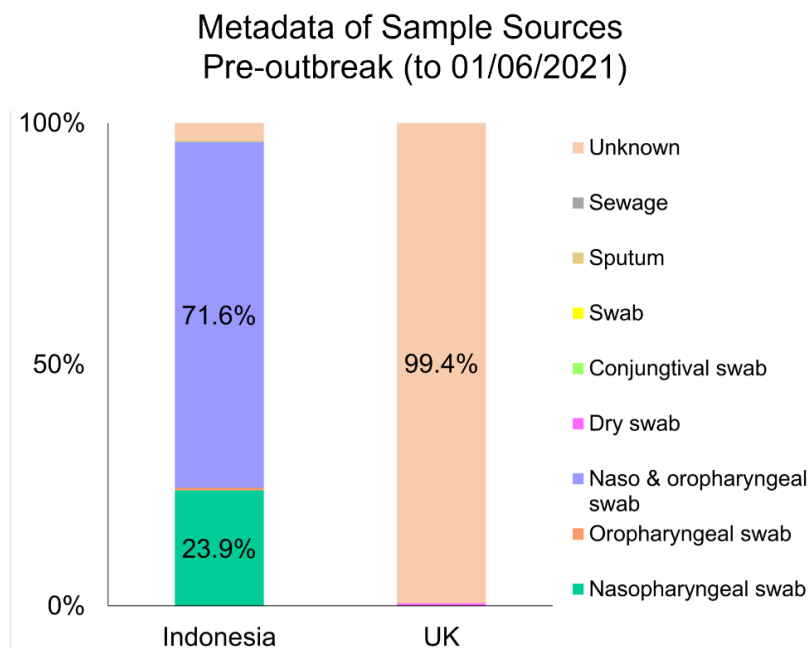

**Figure S4**

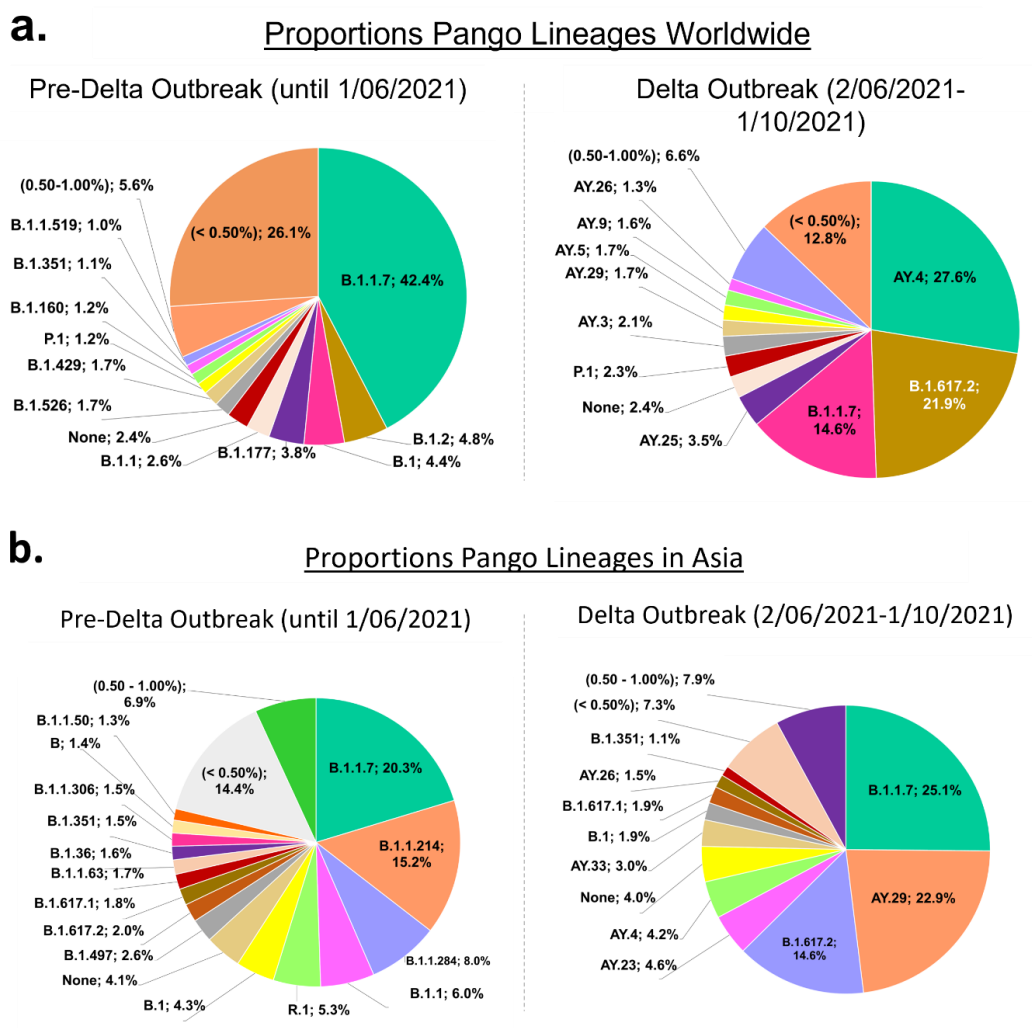

Figure S5

a.

### Pre Delta Outbreak

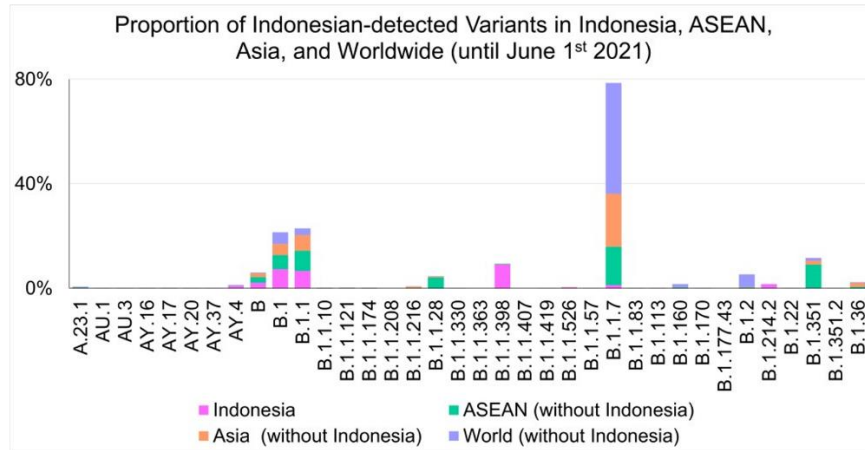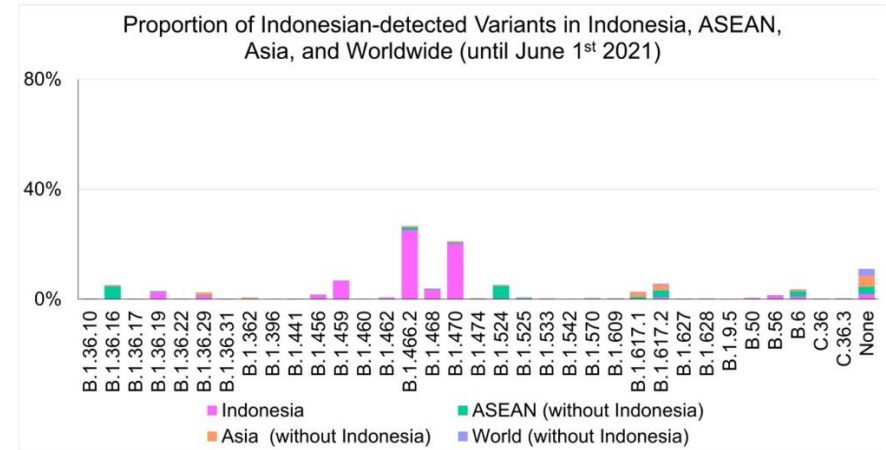

b.

### Delta Outbreak

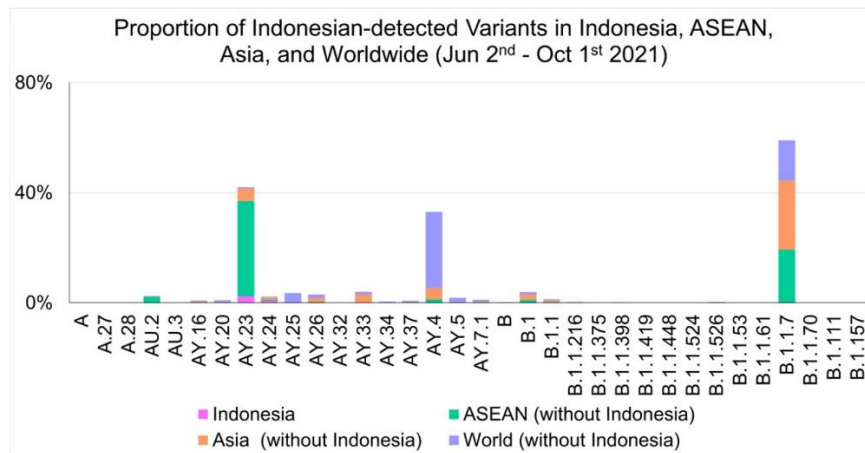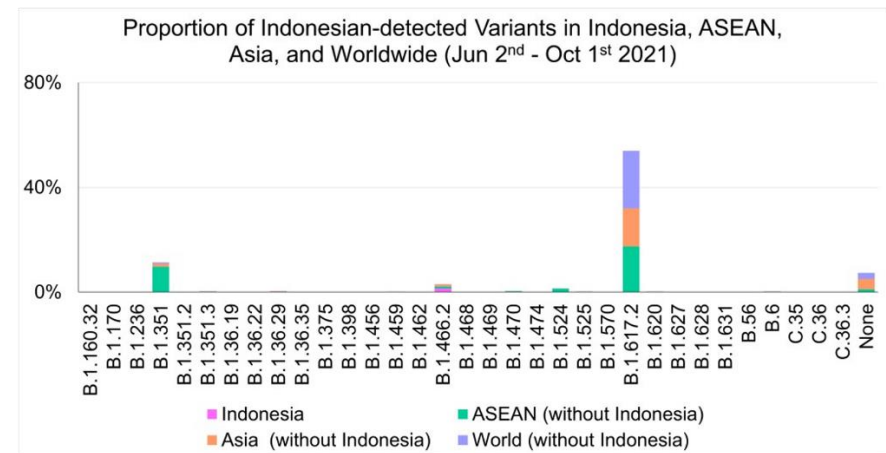

**Figure S6**

**a.**

### Venn Diagram of All Amino Acid Mutation Types of VoCs and Indonesian Variants ( $n = 4357$ )

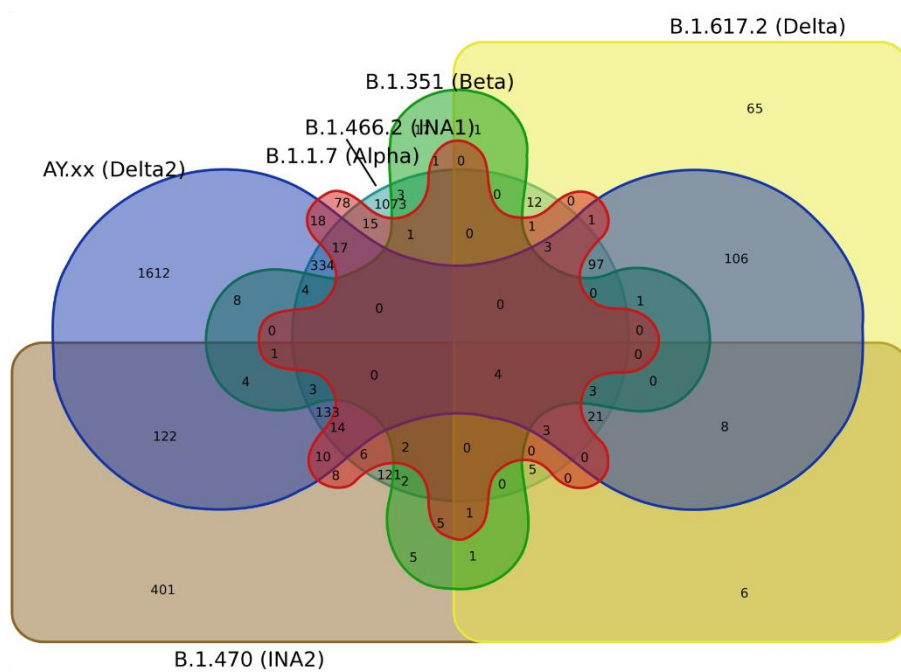

**b.**

### Venn Diagram of All Spike Mutation Types of VoCs and Indonesian Variants ( $n = 541$ )

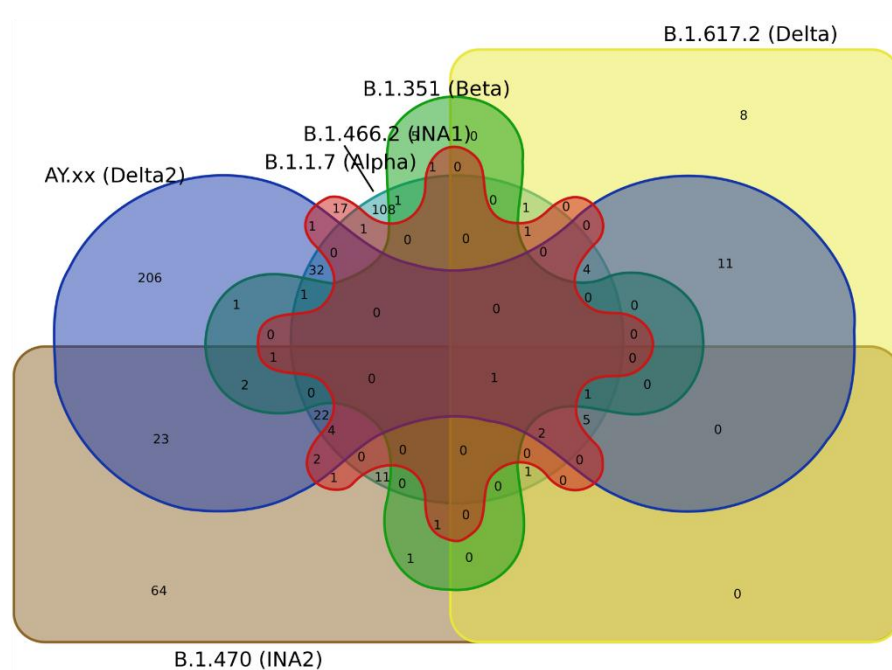

Figure S7

a

Originating country of imported genomes

| Sample ID       | Collection Date | Imported Location  |
|-----------------|-----------------|--------------------|
| EPI_ISL_576387  | 20/08/2020      | Saudi Arabia       |
| EPI_ISL_1239222 | 31/12/2020      | Non-Specific       |
| EPI_ISL_1239223 | 4/01/2021       | Non-Specific       |
| EPI_ISL_1122422 | 10/01/2021      | United Kingdom     |
| EPI_ISL_1239143 | 8/02/2021       | Non-Specific       |
| EPI_ISL_2886178 | 13/03/2021      | Malaysia           |
| EPI_ISL_2886179 | 13/03/2021      | Malaysia           |
| EPI_ISL_2886170 | 13/03/2021      | Malaysia           |
| EPI_ISL_2886171 | 13/03/2021      | Malaysia           |
| EPI_ISL_2886174 | 13/03/2021      | Malaysia           |
| EPI_ISL_2886177 | 13/03/2021      | Malaysia           |
| EPI_ISL_2226647 | 21/04/2021      | Non-Specific       |
| EPI_ISL_2429146 | 27/04/2021      | Non-Specific       |
| EPI_ISL_2364675 | 29/04/2021      | India              |
| EPI_ISL_2226648 | 5/05/2021       | Non-Specific       |
| EPI_ISL_4056005 | 12/05/2021      | Malaysia           |
| EPI_ISL_4056006 | 12/05/2021      | Malaysia           |
| EPI_ISL_4056007 | 12/05/2021      | Malaysia           |
| EPI_ISL_4056008 | 12/05/2021      | Malaysia           |
| EPI_ISL_4742352 | 12/05/2021      | Netherlands        |
| EPI_ISL_2692993 | 19/05/2021      | France             |
| EPI_ISL_2692994 | 24/05/2021      | Bosnia-Herzegovina |

b

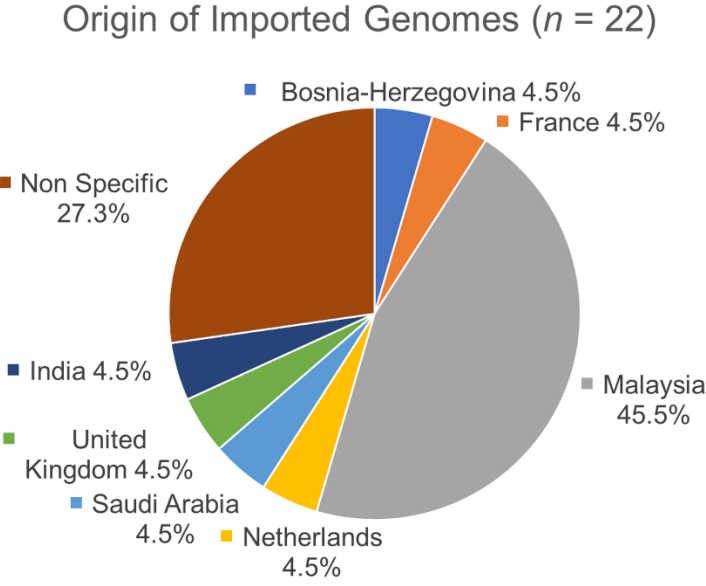

Figure S8

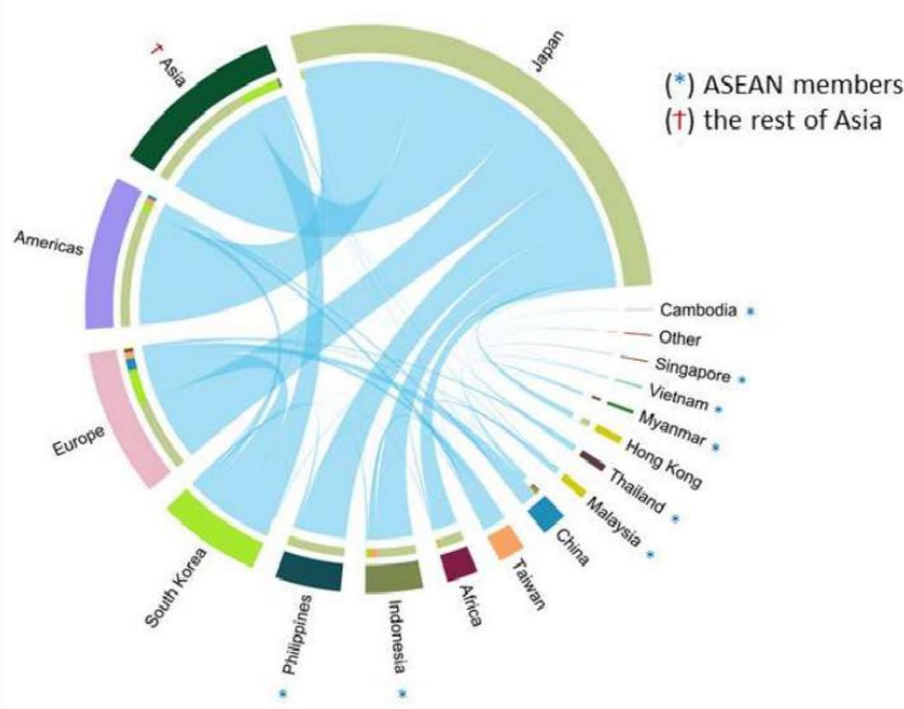

Supplement: s1 [file s1]
