# Supplementary material for: Genome Profiling of SARS-CoV-2 in Indonesia, ASEAN and the Neighbouring East Asian Countries: Features, Challenges and Achievements
Source: MDPI journal article supplement (doi:10.3390/v14040778), 2022-04-08
Supplement: s1 [file s1]

Table S1. Genomes submitted by NICCRAT-BRIN team.

| Accession ID    | Collection Date | Patient Age | Gender | Pango Lineage | Pangolin Version | AA Substitutions                                                                                                                                                                            | Is High Coverage? | Patient Status |
|-----------------|-----------------|-------------|--------|---------------|------------------|---------------------------------------------------------------------------------------------------------------------------------------------------------------------------------------------|-------------------|----------------|
| EPI_ISL_1020188 | 13/01/2021      | 61          | Male   | B.1.459       | 16/09/2021       | Spike_L18F,N_D377Y,NSP12_I539T,Spike_S689R,NSP3_P822L,N_A119S,NSP2_V284I,N_T205I,NS3_Q57H,NSP3_F53L,NS8_S67F,NS6_E54stop,NSP12_P323L,NSP16_I68V,Spike_D614G,NSP3_I483V,NSP3_N844S,NSP3_E37D | NO                | Unknown        |
| EPI_ISL_1117592 | 7/12/2020       | 67          | Male   | B.1.459       | 16/09/2021       | NSP14_T173A,NSP3_P822L,N_S193I,NS3_Q57H,NSP12_P323L,Spike_D614G,NSP12_G596S,NSP2_P91L                                                                                                       | YES               | Hospitalized   |
| EPI_ISL_1118280 | 6/12/2020       | 12          | Male   | B.1.470       | 16/09/2021       | Spike_T719I,NSP3_L368F,NSP14_A323S,N_S194L,NSP6_H11Y,NSP3_T656I,NS3_Q57H,NS3_D27H,NSP12_P323L,Spike_D614G,NSP12_P227L                                                                       | YES               | Symptomatic    |
| EPI_ISL_1020197 | 1/12/2020       | 22          | Female | B.1.1.398     | 16/09/2021       | Spike_P812Q,N_R203K,N_G204R,NSP12_V299F,NSP12_P323L,Spike_D614G,Spike_Q613H                                                                                                                 | YES               | Asymptomatic   |
| EPI_ISL_1117591 | 1/12/2020       | 20          | Female | B.1.459       | 16/09/2021       | NSP2_L271F,Spike_E654Q,NSP3_P822L,N_S193I,NSP12_K91R,NS3_Q57H,NSP12_P323L,N_P365L,Spike_D614G,NSP12_G596S,N_Q289H                                                                           | NO                | Symptomatic    |
| EPI_ISL_1117590 | 30/11/2020      | 45          | Female | B.1.1.398     | 16/09/2021       | NS3_A99V,N_R203K,N_G204R,NSP3_S1285F,NSP12_P323L,Spike_D614G,NSP3_F814L                                                                                                                     | YES               | Symptomatic    |

| Accession ID     | Collection Date | Patient Age | Gender | Pango Lineage | Pangolin Version | AA Substitutions                                                                                                                                 | Is High Coverage? | Patient Status |
|------------------|-----------------|-------------|--------|---------------|------------------|--------------------------------------------------------------------------------------------------------------------------------------------------|-------------------|----------------|
| EPI_ISL_111745_1 | 9/11/2020       | 33          | Female | B.1.1.398     | 16/09/2021       | NSP6_L33M,NSP2_V447I,N_R203K,NSP6_F34V,NSP6_W31Y,N_G204R,NSP5_L220F,NSP6_Q30E,NSP12_P323L,Spike_D614G,NSP6_ins35VL,NSP6_L37F,NS3_S177T,NSP6_T29P | YES               | Unknown        |
| EPI_ISL_113760_1 | 30/10/2020      | 53          | Female | B.1.1.398     | 16/09/2021       | N_R203K,NS3_T89I,N_G204R,NSP12_P323L,Spike_D614G,NSP13_E341D                                                                                     | NO                | Symptomatic    |
| EPI_ISL_102019_2 | 13/10/2020      | 32          | Female | B.1.1.398     | 16/09/2021       | N_R203K,Spike_T719S,N_G204R,NSP3_M1436I,NSP12_P323L,Spike_D614G,Spike_Q613H                                                                      | YES               | Asymptomatic   |
| EPI_ISL_102020_3 | 18/09/2020      | 38          | Male   | B.1.1         | 16/09/2021       | N_P365S,N_R203K,NSP3_L1328F,N_G204R,NSP12_P323L,Spike_D614G                                                                                      | YES               | Symptomatic    |
| EPI_ISL_111745_6 | 7/09/2020       | 55          | Male   | B.1.459       | 16/09/2021       | NS8_L118V,NSP3_P822L,NSP12_M666I,N_S193I,NS3_Q57H,NSP12_P323L,Spike_D614G,NSP12_G596S                                                            | YES               | Unknown        |
| EPI_ISL_111745_7 | 7/09/2020       | 30          | Male   | B.1.459       | 16/09/2021       | NSP3_P822L,N_S193I,NS3_Q57H,Spike_A348S,NSP12_P323L,Spike_D614G,NSP12_G596S,NSP16_A34V                                                           | YES               | Asymptomatic   |

Blue and yellow highlights: mutations shared by all genomes

**Table S2.** List of Indonesian institutions that carried out SARS-CoV-2 WGS per 1 October 2021.

| Institution         | Sequencing Platform |               |           |             |           |
|---------------------|---------------------|---------------|-----------|-------------|-----------|
|                     | Illumina & Sanger   | Illumina only | ONT       | Sanger Only | Sub Total |
| BRIN                | -                   | -             | 11        | -           | 11        |
| BRIN-WJHL           | -                   | -             | 55        | -           | 55        |
| EIJK                | 38                  | 792           | -         | -           | 830       |
| EIJK-NIHRD          | -                   | 383           | -         | -           | 383       |
| EIJK-RSRM           | -                   | 437           | -         | -           | 437       |
| EIJK-UNSRI          | -                   | 54            | -         | -           | 54        |
| EIJK-UNWAR          | -                   | 353           | -         | -           | 353       |
| EIJK-USK            | -                   | 6             | -         | -           | 6         |
| EIJK-WJHL           | -                   | 85            | -         | -           | 85        |
| GSILab              | -                   | -             | 1323      | 1           | 1324      |
| IRCVS               | -                   | -             | 2         | -           | 2         |
| ITD-UNAIR           | -                   | 161           | 10        | -           | 171       |
| LIPI                | -                   | -             | 223       | -           | 223       |
| <b>LIPI-NICCRAT</b> | -                   | -             | <b>12</b> | -           | <b>12</b> |
| LIPI-NIHRD          | -                   | -             | 139       | -           | 139       |
| LIPI-UNSOED         | -                   | -             | 15        | -           | 15        |
| UNHAS               | -                   | -             | 44        | -           | 44        |
| MRINUPH             | -                   | -             | -         | 17          | 17        |
| MRINUPH-EIJK        | -                   | 92            | -         | -           | 92        |
| NIHRD               | 7                   | 2021          | 12        | 17          | 2057      |
| SHSIU               | -                   | -             | 14        | -           | 14        |
| TFRIC               | -                   | 14            | 2         | -           | 16        |
| TUH                 | -                   | 11            | 11        | -           | 22        |
| UA                  | -                   | 70            | -         | -           | 70        |
| UGM                 | -                   | 161           | -         | -           | 161       |
| UI                  | -                   | 37            | 55        | -           | 92        |

| Institution  | Sequencing Platform |               |             |             |             |
|--------------|---------------------|---------------|-------------|-------------|-------------|
|              | Illumina & Sanger   | Illumina only | ONT         | Sanger Only | Sub Total   |
| UI-NIHRD     | -                   | 46            | -           | -           | 46          |
| UNS          | -                   | 10            | -           | -           | 10          |
| UPNVJ        | -                   | 9             | -           | -           | 9           |
| USU          | -                   | 23            | -           | -           | 23          |
| WJHL-ITB     | -                   | 100           | -           | -           | 100         |
| <b>Total</b> | <b>45</b>           | <b>4865</b>   | <b>1928</b> | <b>35</b>   | <b>6873</b> |

BRIN: National Research and Innovation Agency; Eijk: Eijkman Research Center for Molecular Biology; GSILab: Laboratory of Genomik Solidaritas Indonesia ; IRCVS: Indonesian Research Center for Veterinary Science; ITB: Bandung Institute of technology; ITD-UNAIR: Research Center for Vaccine Technology and Development, Institute of Tropical Disease, Airlangga University; LIPI: Indonesian Institute of Sciences; MRINUPH: Mochtar Riady Institute for Nanotechnology-Universitas Pelita Harapan; NICCRAT: Nottingham Indonesia Collaboration for Clinical Research and Training; NIHRD: National Institute of Health Research and Development; RSRM: Raden Mattaher Regional General Hospital ; SHSIU: Syarif Hidayatullah State Islamic University Jakarta; TFRIC: Padjadjaran University; Bandung Insitute of Technology; West Java Health Laboratory; TUH: Tanjungpura University Hospital; UA: Institute of Tropical Disease-Airlangga University; UGM: Gadjah Mada University; UHAS: Hasanuddin University; UI: University of Indonesia; UNS: Sebelas Maret University; UNSOED: Jenderal Soedirman University; UNSRI: Sriwijaya University; UNWAR: Warmadewa University; UPNVJ: University of Pembangunan Nasional Veteran Jakarta; USK: Syiah Kuala University; USU: Sumatera Utara University; WJHL: West Java Health Laboratory.

**Table S3.** Clinical metadata of genomes in Indonesia, Southeast and East Asia Pre-Delta Outbreak per 1 June 2021.

| Country          | Live       | Deceased  | Not Hospitalized/<br>Asymptomatic | Hospitalized/<br>Symptomatic | No. Sequenced Genomes | Recorded Metadata (% Sequenced Genome) |
|------------------|------------|-----------|-----------------------------------|------------------------------|-----------------------|----------------------------------------|
| Japan            | 114        | 16        | 62                                | 9,114                        | 50,241                | 18.5%                                  |
| South Korea      | 25         | 9         | 0                                 | 0                            | 6216                  | 0.5%                                   |
| Philippines      | 3,593      | 73        | 0                                 | 11                           | 4295                  | 85.6%                                  |
| Hong Kong        | 601        | 26        | 0                                 | 323                          | 2837                  | 33.5%                                  |
| Singapore        | 0          | 0         | 0                                 | 553                          | 2576                  | 21.5%                                  |
| <b>Indonesia</b> | <b>811</b> | <b>25</b> | <b>26</b>                         | <b>477</b>                   | <b>1806</b>           | <b>74.1%</b>                           |
| Thailand         | 8          | 0         | 0                                 | 3                            | 1404                  | 0.8%                                   |
| China            | 239        | 1         | 2                                 | 153                          | 1220                  | 32.4%                                  |
| Malaysia         | 476        | 7         | 3                                 | 64                           | 745                   | 73.8%                                  |
| Cambodia         | 278        | 0         | 0                                 | 0                            | 281                   | 98.9%                                  |
| Taiwan           | 25         | 0         | 0                                 | 74                           | 193                   | 51.3%                                  |
| Vietnam          | 79         | 0         | 0                                 | 3                            | 158                   | 51.9%                                  |
| Myanmar          | 2          | 0         | 0                                 | 0                            | 41                    | 4.9%                                   |
| Timor-Leste      | 0          | 0         | 0                                 | 0                            | 19                    | 0.0%                                   |
| Brunei           | 0          | 0         | 0                                 | 0                            | 10                    | 0.0%                                   |

**Table S4.** Age and Sex Distribution of Countries.

| Country        | % Ages of Total Population |                    |                  | % Sex of Total Population |          |
|----------------|----------------------------|--------------------|------------------|---------------------------|----------|
|                | 0-14<br>Years [1]          | 15-64<br>Years [2] | >65<br>Years [3] | Female [4]                | Male [5] |
| China          | 13                         | 71                 | 11               | 48.7                      | 51       |
| Hong Kong      | 12                         | 70                 | 17               | 54.0                      | 46       |
| Indonesia      | 26                         | 68                 | 6                | 49.6                      | 50       |
| Japan          | 13                         | 59                 | 28               | 51.2                      | 49       |
| South Korea    | 13                         | 72                 | 15               | 49.9                      | 50       |
| United Kingdom | 18                         | 64                 | 19               | 50.6                      | 49       |

**Table S5.** Functions of genes and their mutation effects.

| <b>Mutation</b> | <b>Variant</b> | <b>Gene Function</b>                                                                                                                 | <b>Mutation Effect</b>                                                                                                         |
|-----------------|----------------|--------------------------------------------------------------------------------------------------------------------------------------|--------------------------------------------------------------------------------------------------------------------------------|
| NSP12_P323L     | All shared     | RNA-dependent RNA polymerase (RdRp) [6]                                                                                              | Correlate with increase mortality rate in the East Mediterranean Region when mutation is in single incidence [6]               |
| NSP4_K35R       | All shared     | Transmembrane proteins involved in regulating the host immunity, modifying host cell organelles for viral replication and escape [7] | Currently no data                                                                                                              |
| NSP6_L37F       | All shared     | Transmembrane protein involved in regulation of the host autophagy [8]                                                               | Correlate with asymptomatic infection; reduced abilities to activate inflammasomes and pyroptosis [8]                          |
| Spike_D614G     | All shared     | Trimeric spike (S) protein [9]                                                                                                       | More stabilisation of ACE2 binding [9]                                                                                         |
| Spike_N439K     | B.1.466.2      | Receptor binding motif (RBM) of the trimeric (S) protein [10]                                                                        | Enhanced binding affinity to the hACE2 receptor and confers resistance against several neutralizing monoclonal antibodies [10] |
| NS3_S220I       | B.1.4770       | Accessory protein to mask virus from class I major histocompatibility factors (MHC) [11]                                             | Currently no data                                                                                                              |
| NSP2_L217V      | B.1.4770       | Transmembrane protein [12]                                                                                                           | Currently no data                                                                                                              |

## References

1. Population ages 0-14 (% of total population) | Data, (n.d.). [https://data.worldbank.org/indicator/SP.POP.0014.TO.ZS?name\\_desc=false&view=chart](https://data.worldbank.org/indicator/SP.POP.0014.TO.ZS?name_desc=false&view=chart) (accessed June 13, 2021).
2. Population ages 15-64 (% of total population) | Data, (n.d.). [https://data.worldbank.org/indicator/SP.POP.1564.TO.ZS?name\\_desc=false&view=chart](https://data.worldbank.org/indicator/SP.POP.1564.TO.ZS?name_desc=false&view=chart) (accessed June 13, 2021).
3. Population ages 65 and above (% of total population) | Data, (n.d.). [https://data.worldbank.org/indicator/SP.POP.65UP.TO.ZS?name\\_desc=false&view=chart](https://data.worldbank.org/indicator/SP.POP.65UP.TO.ZS?name_desc=false&view=chart) (accessed June 13, 2021).
4. Population, female (% of total population) | Data, (n.d.). [https://data.worldbank.org/indicator/SP.POP.TOTL.FE.ZS?name\\_desc=false](https://data.worldbank.org/indicator/SP.POP.TOTL.FE.ZS?name_desc=false) (accessed June 13, 2021).
5. Population, male (% of total population) | Data, (n.d.). [https://data.worldbank.org/indicator/SP.POP.TOTL.MA.ZS?name\\_desc=false](https://data.worldbank.org/indicator/SP.POP.TOTL.MA.ZS?name_desc=false) (accessed June 13, 2021).
6. S. Omais, S. Kharroubi, H. Zaraket, No association between the SARS-CoV-2 variants and mortality rates in the Eastern Mediterranean Region, *Gene* 801 (2021) 145843. <https://doi.org/10.1016/J.GENE.2021.145843>.
7. S. Thomas, Mapping the Nonstructural Transmembrane Proteins of Severe Acute Respiratory Syndrome Coronavirus 2, *J. Comput. Biol.* 28 (2021) 909–921. [https://doi.org/10.1089/CMB.2020.0627/ASSET/IMAGES/LARGE/CMB.2020.0627\\_FIGURE5B.JPEG](https://doi.org/10.1089/CMB.2020.0627/ASSET/IMAGES/LARGE/CMB.2020.0627_FIGURE5B.JPEG).
8. X. Sun, Y. Liu, Z. Huang, W. Xu, W. Hu, L. Yi, Z. Liu, H. Chan, J. Zeng, X. Liu, H. Chen, J. Yu, F.K.L. Chan, S.C. Ng, S.H. Wong, M.H. Wang, T. Gin, G.M. Joynt, D.S.C. Hui, X. Zou, Y. Shu, C.H.K. Cheng, S. Fang, H. Luo, J. Lu, M.T.V. Chan, L. Zhang, W.K.K. Wu, SARS-CoV-2 non-structural protein 6 triggers NLRP3-dependent pyroptosis by targeting ATP6AP1, *Cell Death Differ.* 2021. (2022) 1–15. <https://doi.org/10.1038/s41418-021-00916-7>.
9. J. Zhang, Y. Cai, T. Xiao, J. Lu, H. Peng, S.M. Sterling, R.M. Walsh, S. Rits-Volloch, H. Zhu, A.N. Woosley, W. Yang, P. Sliz, B. Chen, Structural impact on SARS-CoV-2 spike protein by D614G substitution, *Science* (80-. ). 372 (2021) 525–530. [https://doi.org/10.1126/SCIENCE.ABF2303/SUPPL\\_FILE/ABF2303\\_ZHANG\\_SM.PDF](https://doi.org/10.1126/SCIENCE.ABF2303/SUPPL_FILE/ABF2303_ZHANG_SM.PDF).
10. E.C. Thomson, L.E. Rosen, J.G. Shepherd, R. Spreafico, A. da Silva Filipe, J.A. Wojcechowskyj, C. Davis, L. Piccoli, D.J. Pascall, J. Dillen, S. Lytras, N. Czudnochowski, R. Shah, M. Meury, N. Jesudason, A. De Marco, K. Li, J. Bassi, A. O'Toole, D. Pinto, R.M. Colquhoun, K. Culap, B. Jackson, F. Zatta, A. Rambaut, S. Jacon, V.B. Sreenu, J. Nix, I. Zhang, R.F. Jarrett, W.G. Glass, M. Beltramello, K. Nomikou, M. Pizzuto, L. Tong, E. Cameroni, T.I. Croll, N. Johnson, J. Di Iulio, A. Wickenhagen, A. Ceschi, A.M. Harbison, D. Mair, P. Ferrari, K. Smollett, F. Sallusto, S. Carmichael, C. Garzoni, J. Nichols, M. Galli, J. Hughes, A. Riva, A. Ho, M. Schiuma, M.G. Semple, P.J.M. Openshaw, E. Fadda, J.K. Baillie, J.D. Chodera, S.J. Rihn, S.J. Lycett, H.W. Virgin, A. Telenti, D. Corti, D.L. Robertson, G. Snell, Circulating SARS-CoV-2 spike N439K variants maintain fitness while evading antibody-mediated immunity, *Cell* 184 (2021) 1171–1187.e20. <https://doi.org/10.1016/J.CELL.2021.01.037>.
11. S. Mudgal, R. Yadav, H.R. Haokip, A. Pandit, Y.S. Mary, Genomic variation and point mutations analysis of Indian COVID-19 patient samples submitted in GISAID database, *J. Indian Chem. Soc.* 98 (2021) 100156. <https://doi.org/10.1016/J.JICS.2021.100156>.
12. S. Angeletti, D. Benvenuto, M. Bianchi, M. Giovanetti, S. Pascarella, M. Ciccozzi, COVID-2019: The role of the nsp2 and nsp3 in its pathogenesis, *J. Med. Virol.* 92 (2020) 584–588. <https://doi.org/10.1002/JMV.25719>.
