# Supplementary material for: Genome Profiling of SARS-CoV-2 in Indonesia, ASEAN and the Neighbouring East Asian Countries: Features, Challenges and Achievements
Source: MDPI journal article supplement (doi:10.3390/v14040778), 2022-04-08
Supplement: s1 [file s1]

| virus_name                        | epiID           | submission_date |
|-----------------------------------|-----------------|-----------------|
| hCoV-19/Japan/OPHO-Hb7-47-2C/2021 | EPI_ISL_3447067 | 2021-08-17      |
| hCoV-19/Japan/OPHO-Hb7-49/2021    | EPI_ISL_3446655 | 2021-08-17      |
| hCoV-19/Japan/TKYK24329/2021      | EPI_ISL_3447681 | 2021-08-17      |
| hCoV-19/Japan/TKYK24382/2021      | EPI_ISL_3447682 | 2021-08-17      |
| hCoV-19/Japan/TKYK24555/2021      | EPI_ISL_3457044 | 2021-08-17      |
| hCoV-19/Japan/TKYK24656/2021      | EPI_ISL_3447683 | 2021-08-17      |
| hCoV-19/Japan/TKYK24693/2021      | EPI_ISL_3457054 | 2021-08-17      |
| hCoV-19/Japan/TKYK24775/2021      | EPI_ISL_3447684 | 2021-08-17      |
| hCoV-19/Japan/TKYK24800/2021      | EPI_ISL_3457056 | 2021-08-17      |
| hCoV-19/Japan/TKYK24909/2021      | EPI_ISL_3447685 | 2021-08-17      |
| hCoV-19/Japan/TKYK25032/2021      | EPI_ISL_3447694 | 2021-08-17      |
| hCoV-19/Japan/TKYK25048/2021      | EPI_ISL_3457057 | 2021-08-17      |
| hCoV-19/Japan/TKYK25073/2021      | EPI_ISL_3457059 | 2021-08-17      |
| hCoV-19/Japan/TKYK25078/2021      | EPI_ISL_3457060 | 2021-08-17      |
| hCoV-19/Japan/TKYK25079/2021      | EPI_ISL_3457062 | 2021-08-17      |
| hCoV-19/Japan/TKYK25364/2021      | EPI_ISL_3447687 | 2021-08-17      |
| hCoV-19/Japan/TKYK25376/2021      | EPI_ISL_3447696 | 2021-08-17      |
| hCoV-19/Japan/TKYK25619/2021      | EPI_ISL_3447697 | 2021-08-17      |
| hCoV-19/Japan/TKYK25625/2021      | EPI_ISL_3447688 | 2021-08-17      |
| hCoV-19/Japan/TKYK25639/2021      | EPI_ISL_3447689 | 2021-08-17      |
| hCoV-19/Japan/TKYK25641/2021      | EPI_ISL_3447690 | 2021-08-17      |
| hCoV-19/Japan/TKYK25645/2021      | EPI_ISL_3447698 | 2021-08-17      |
| hCoV-19/Japan/TKYK25735/2021      | EPI_ISL_3447699 | 2021-08-17      |
| hCoV-19/Japan/TKYK25778/2021      | EPI_ISL_3447700 | 2021-08-17      |
| hCoV-19/Japan/TKYK25787/2021      | EPI_ISL_3447702 | 2021-08-17      |
| hCoV-19/Japan/TKYK25789/2021      | EPI_ISL_3447703 | 2021-08-17      |
| hCoV-19/Japan/TKYK25797/2021      | EPI_ISL_3447691 | 2021-08-17      |
| hCoV-19/Japan/TKYK25806/2021      | EPI_ISL_3447692 | 2021-08-17      |
| hCoV-19/Japan/TKYK25808/2021      | EPI_ISL_3447704 | 2021-08-17      |
| hCoV-19/Japan/TKYK26257/2021      | EPI_ISL_3447693 | 2021-08-17      |
| hCoV-19/Japan/TKYK26259/2021      | EPI_ISL_3447705 | 2021-08-17      |
| hCoV-19/Japan/TKYS00473/2021      | EPI_ISL_3447686 | 2021-08-17      |
| hCoV-19/Japan/TKYS00474/2021      | EPI_ISL_3447695 | 2021-08-17      |
| hCoV-19/Japan/TKYS00484/2021      | EPI_ISL_3447701 | 2021-08-17      |
| hCoV-19/Japan/YCH0543/2021        | EPI_ISL_3449308 | 2021-08-17      |
| hCoV-19/Japan/YCH0544/2021        | EPI_ISL_3449319 | 2021-08-17      |
| hCoV-19/Japan/YCH0545/2021        | EPI_ISL_3449309 | 2021-08-17      |
| hCoV-19/Japan/YCH0546/2021        | EPI_ISL_3449310 | 2021-08-17      |
| hCoV-19/Japan/YCH0547/2021        | EPI_ISL_3449304 | 2021-08-17      |
| hCoV-19/Japan/YCH0548/2021        | EPI_ISL_3449311 | 2021-08-17      |
| hCoV-19/Japan/YCH0549/2021        | EPI_ISL_3449305 | 2021-08-17      |
| hCoV-19/Japan/YCH0550/2021        | EPI_ISL_3449312 | 2021-08-17      |
| hCoV-19/Japan/YCH0551/2021        | EPI_ISL_3449313 | 2021-08-17      |
| hCoV-19/Japan/YCH0552/2021        | EPI_ISL_3449314 | 2021-08-17      |
| hCoV-19/Japan/YCH0553/2021        | EPI_ISL_3449315 | 2021-08-17      |
| hCoV-19/Japan/YCH0554/2021        | EPI_ISL_3449316 | 2021-08-17      |
| hCoV-19/Japan/YCH0555/2021        | EPI_ISL_3449306 | 2021-08-17      |
| hCoV-19/Japan/YCH0556/2021        | EPI_ISL_3449317 | 2021-08-17      |
| hCoV-19/Japan/YCH0557/2021        | EPI_ISL_3449318 | 2021-08-17      |
| hCoV-19/Japan/YCH0558/2021        | EPI_ISL_3449307 | 2021-08-17      |
| hCoV-19/Japan/RIMD00206/2021      | EPI_ISL_3477106 | 2021-08-18      |
| hCoV-19/Japan/RIMD00207/2021      | EPI_ISL_3477107 | 2021-08-18      |
| hCoV-19/Japan/RIMD00208/2021      | EPI_ISL_3477108 | 2021-08-18      |
| hCoV-19/Japan/RIMD00209/2021      | EPI_ISL_3477109 | 2021-08-18      |

| virus_name                   | epiID           | submission_date |
|------------------------------|-----------------|-----------------|
| hCoV-19/Japan/RIMD00210/2021 | EPI_ISL_3477110 | 2021-08-18      |
| hCoV-19/Japan/RIMD00211/2021 | EPI_ISL_3477111 | 2021-08-18      |
| hCoV-19/Japan/RIMD00212/2021 | EPI_ISL_3477112 | 2021-08-18      |
| hCoV-19/Japan/RIMD00213/2021 | EPI_ISL_3477113 | 2021-08-18      |
| hCoV-19/Japan/RIMD00214/2021 | EPI_ISL_3477114 | 2021-08-18      |
| hCoV-19/Japan/RIMD00215/2021 | EPI_ISL_3477115 | 2021-08-18      |
| hCoV-19/Japan/RIMD00216/2021 | EPI_ISL_3477116 | 2021-08-18      |
| hCoV-19/Japan/RIMD00218/2021 | EPI_ISL_3477117 | 2021-08-18      |
| hCoV-19/Japan/RIMD00219/2021 | EPI_ISL_3477118 | 2021-08-18      |
| hCoV-19/Japan/RIMD00220/2021 | EPI_ISL_3477119 | 2021-08-18      |
| hCoV-19/Japan/RIMD00221/2021 | EPI_ISL_3477120 | 2021-08-18      |
| hCoV-19/Japan/RIMD00222/2021 | EPI_ISL_3477121 | 2021-08-18      |
| hCoV-19/Japan/RIMD00223/2021 | EPI_ISL_3477122 | 2021-08-18      |
| hCoV-19/Japan/RIMD00224/2021 | EPI_ISL_3477123 | 2021-08-18      |
| hCoV-19/Japan/RIMD00225/2021 | EPI_ISL_3477124 | 2021-08-18      |
| hCoV-19/Japan/RIMD00226/2021 | EPI_ISL_3477125 | 2021-08-18      |
| hCoV-19/Japan/RIMD00227/2021 | EPI_ISL_3477126 | 2021-08-18      |
| hCoV-19/Japan/RIMD00228/2021 | EPI_ISL_3477127 | 2021-08-18      |
| hCoV-19/Japan/RIMD00229/2021 | EPI_ISL_3477128 | 2021-08-18      |
| hCoV-19/Japan/RIMD00230/2021 | EPI_ISL_3477129 | 2021-08-18      |
| hCoV-19/Japan/RIMD00231/2021 | EPI_ISL_3477130 | 2021-08-18      |
| hCoV-19/Japan/RIMD00232/2021 | EPI_ISL_3477131 | 2021-08-18      |
| hCoV-19/Japan/RIMD00233/2021 | EPI_ISL_3477132 | 2021-08-18      |
| hCoV-19/Japan/RIMD00234/2021 | EPI_ISL_3477133 | 2021-08-18      |
| hCoV-19/Japan/RIMD00235/2021 | EPI_ISL_3477134 | 2021-08-18      |
| hCoV-19/Japan/RIMD00236/2021 | EPI_ISL_3477135 | 2021-08-18      |
| hCoV-19/Japan/RIMD00237/2021 | EPI_ISL_3477136 | 2021-08-18      |
| hCoV-19/Japan/RIMD00238/2021 | EPI_ISL_3477137 | 2021-08-18      |
| hCoV-19/Japan/RIMD00239/2021 | EPI_ISL_3477138 | 2021-08-18      |
| hCoV-19/Japan/RIMD00240/2021 | EPI_ISL_3477139 | 2021-08-18      |
| hCoV-19/Japan/RIMD00241/2021 | EPI_ISL_3477140 | 2021-08-18      |
| hCoV-19/Japan/RIMD00242/2021 | EPI_ISL_3477141 | 2021-08-18      |
| hCoV-19/Japan/RIMD00243/2021 | EPI_ISL_3477142 | 2021-08-18      |
| hCoV-19/Japan/RIMD00244/2021 | EPI_ISL_3477154 | 2021-08-18      |
| hCoV-19/Japan/RIMD00245/2021 | EPI_ISL_3477155 | 2021-08-18      |
| hCoV-19/Japan/RIMD00246/2021 | EPI_ISL_3477156 | 2021-08-18      |
| hCoV-19/Japan/RIMD00247/2021 | EPI_ISL_3477157 | 2021-08-18      |
| hCoV-19/Japan/RIMD00248/2021 | EPI_ISL_3477158 | 2021-08-18      |
| hCoV-19/Japan/RIMD00249/2021 | EPI_ISL_3477159 | 2021-08-18      |
| hCoV-19/Japan/RIMD00250/2021 | EPI_ISL_3477160 | 2021-08-18      |
| hCoV-19/Japan/RIMD00251/2021 | EPI_ISL_3477161 | 2021-08-18      |
| hCoV-19/Japan/RIMD00252/2021 | EPI_ISL_3477162 | 2021-08-18      |
| hCoV-19/Japan/B178/2021      | EPI_ISL_3494557 | 2021-08-19      |
| hCoV-19/Japan/RIMD00253/2021 | EPI_ISL_3501814 | 2021-08-19      |
| hCoV-19/Japan/RIMD00254/2021 | EPI_ISL_3501815 | 2021-08-19      |
| hCoV-19/Japan/RIMD00255/2021 | EPI_ISL_3502868 | 2021-08-19      |
| hCoV-19/Japan/RIMD00256/2021 | EPI_ISL_3502869 | 2021-08-19      |
| hCoV-19/Japan/RIMD00257/2021 | EPI_ISL_3502870 | 2021-08-19      |
| hCoV-19/Japan/RIMD00258/2021 | EPI_ISL_3502871 | 2021-08-19      |
| hCoV-19/Japan/RIMD00259/2021 | EPI_ISL_3502872 | 2021-08-19      |
| hCoV-19/Japan/RIMD00260/2021 | EPI_ISL_3502873 | 2021-08-19      |
| hCoV-19/Japan/RIMD00261/2021 | EPI_ISL_3502874 | 2021-08-19      |
| hCoV-19/Japan/RIMD00262/2021 | EPI_ISL_3502875 | 2021-08-19      |
| hCoV-19/Japan/RIMD00263/2021 | EPI_ISL_3502876 | 2021-08-19      |

| virus_name                   | epiID           | submission_date |
|------------------------------|-----------------|-----------------|
| hCoV-19/Japan/RIMD00264/2021 | EPI_ISL_3502877 | 2021-08-19      |
| hCoV-19/Japan/RIMD00265/2021 | EPI_ISL_3502878 | 2021-08-19      |
| hCoV-19/Japan/RIMD00266/2021 | EPI_ISL_3502879 | 2021-08-19      |
| hCoV-19/Japan/RIMD00267/2021 | EPI_ISL_3502880 | 2021-08-19      |
| hCoV-19/Japan/RIMD00268/2021 | EPI_ISL_3502881 | 2021-08-19      |
| hCoV-19/Japan/RIMD00269/2021 | EPI_ISL_3502882 | 2021-08-19      |
| hCoV-19/Japan/RIMD00270/2021 | EPI_ISL_3502883 | 2021-08-19      |
| hCoV-19/Japan/RIMD00271/2021 | EPI_ISL_3502884 | 2021-08-19      |
| hCoV-19/Japan/RIMD00272/2021 | EPI_ISL_3502885 | 2021-08-19      |
| hCoV-19/Japan/RIMD00273/2021 | EPI_ISL_3502886 | 2021-08-19      |
| hCoV-19/Japan/RIMD00274/2021 | EPI_ISL_3503136 | 2021-08-19      |
| hCoV-19/Japan/RIMD00275/2021 | EPI_ISL_3503137 | 2021-08-19      |
| hCoV-19/Japan/RIMD00276/2021 | EPI_ISL_3503138 | 2021-08-19      |
| hCoV-19/Japan/RIMD00277/2021 | EPI_ISL_3503139 | 2021-08-19      |
| hCoV-19/Japan/RIMD00278/2021 | EPI_ISL_3503140 | 2021-08-19      |
| hCoV-19/Japan/RIMD00279/2021 | EPI_ISL_3503141 | 2021-08-19      |
| hCoV-19/Japan/RIMD00280/2021 | EPI_ISL_3503142 | 2021-08-19      |
| hCoV-19/Japan/RIMD00281/2021 | EPI_ISL_3503143 | 2021-08-19      |
| hCoV-19/Japan/RIMD00282/2021 | EPI_ISL_3503144 | 2021-08-19      |
| hCoV-19/Japan/RIMD00283/2021 | EPI_ISL_3503145 | 2021-08-19      |
| hCoV-19/Japan/RIMD00284/2021 | EPI_ISL_3503146 | 2021-08-19      |
| hCoV-19/Japan/RIMD00285/2021 | EPI_ISL_3503147 | 2021-08-19      |
| hCoV-19/Japan/RIMD00286/2021 | EPI_ISL_3503274 | 2021-08-19      |
| hCoV-19/Japan/RIMD00287/2021 | EPI_ISL_3503275 | 2021-08-19      |
| hCoV-19/Japan/RIMD00288/2021 | EPI_ISL_3503276 | 2021-08-19      |
| hCoV-19/Japan/RIMD00289/2021 | EPI_ISL_3503277 | 2021-08-19      |
| hCoV-19/Japan/RIMD00290/2021 | EPI_ISL_3503278 | 2021-08-19      |
| hCoV-19/Japan/RIMD00291/2021 | EPI_ISL_3503279 | 2021-08-19      |
| hCoV-19/Japan/RIMD00292/2021 | EPI_ISL_3503280 | 2021-08-19      |
| hCoV-19/Japan/RIMD00293/2021 | EPI_ISL_3503281 | 2021-08-19      |
| hCoV-19/Japan/RIMD00294/2021 | EPI_ISL_3503282 | 2021-08-19      |
| hCoV-19/Japan/RIMD00295/2021 | EPI_ISL_3503283 | 2021-08-19      |
| hCoV-19/Japan/RIMD00296/2021 | EPI_ISL_3503284 | 2021-08-19      |
| hCoV-19/Japan/RIMD00297/2021 | EPI_ISL_3503285 | 2021-08-19      |
| hCoV-19/Japan/RIMD00298/2021 | EPI_ISL_3503286 | 2021-08-19      |
| hCoV-19/Japan/RIMD00299/2021 | EPI_ISL_3503287 | 2021-08-19      |
| hCoV-19/Japan/RIMD00300/2021 | EPI_ISL_3503288 | 2021-08-19      |
| hCoV-19/Japan/RIMD00301/2021 | EPI_ISL_3503289 | 2021-08-19      |
| hCoV-19/Japan/RIMD00302/2021 | EPI_ISL_3503290 | 2021-08-19      |
| hCoV-19/Japan/RIMD00303/2021 | EPI_ISL_3503291 | 2021-08-19      |
| hCoV-19/Japan/RIMD00304/2021 | EPI_ISL_3502888 | 2021-08-19      |
| hCoV-19/Japan/RIMD00305/2021 | EPI_ISL_3502889 | 2021-08-19      |
| hCoV-19/Japan/IC-1715/2021   | EPI_ISL_3543168 | 2021-08-20      |
| hCoV-19/Japan/IC-1716/2021   | EPI_ISL_3543182 | 2021-08-20      |
| hCoV-19/Japan/IC-1717/2021   | EPI_ISL_3543178 | 2021-08-20      |
| hCoV-19/Japan/IC-1718/2021   | EPI_ISL_3543169 | 2021-08-20      |
| hCoV-19/Japan/IC-1719/2021   | EPI_ISL_3543160 | 2021-08-20      |
| hCoV-19/Japan/IC-1720/2021   | EPI_ISL_3543151 | 2021-08-20      |
| hCoV-19/Japan/IC-1721/2021   | EPI_ISL_3543141 | 2021-08-20      |
| hCoV-19/Japan/IC-1722/2021   | EPI_ISL_3543142 | 2021-08-20      |
| hCoV-19/Japan/IC-1723/2021   | EPI_ISL_3543179 | 2021-08-20      |
| hCoV-19/Japan/IC-1724/2021   | EPI_ISL_3543180 | 2021-08-20      |
| hCoV-19/Japan/IC-1725/2021   | EPI_ISL_3543181 | 2021-08-20      |
| hCoV-19/Japan/IC-1726/2021   | EPI_ISL_3543170 | 2021-08-20      |

| virus_name                 | epiID           | submission_date |
|----------------------------|-----------------|-----------------|
| hCoV-19/Japan/IC-1727/2021 | EPI_ISL_3543171 | 2021-08-20      |
| hCoV-19/Japan/IC-1728/2021 | EPI_ISL_3543172 | 2021-08-20      |
| hCoV-19/Japan/IC-1729/2021 | EPI_ISL_3543161 | 2021-08-20      |
| hCoV-19/Japan/IC-1730/2021 | EPI_ISL_3543162 | 2021-08-20      |
| hCoV-19/Japan/IC-1731/2021 | EPI_ISL_3543152 | 2021-08-20      |
| hCoV-19/Japan/IC-1732/2021 | EPI_ISL_3543153 | 2021-08-20      |
| hCoV-19/Japan/IC-1733/2021 | EPI_ISL_3543154 | 2021-08-20      |
| hCoV-19/Japan/IC-1734/2021 | EPI_ISL_3543143 | 2021-08-20      |
| hCoV-19/Japan/IC-1735/2021 | EPI_ISL_3543144 | 2021-08-20      |
| hCoV-19/Japan/IC-1736/2021 | EPI_ISL_3543145 | 2021-08-20      |
| hCoV-19/Japan/IC-1737/2021 | EPI_ISL_3543132 | 2021-08-20      |
| hCoV-19/Japan/IC-1738/2021 | EPI_ISL_3543173 | 2021-08-20      |
| hCoV-19/Japan/IC-1739/2021 | EPI_ISL_3543163 | 2021-08-20      |
| hCoV-19/Japan/IC-1740/2021 | EPI_ISL_3543164 | 2021-08-20      |
| hCoV-19/Japan/IC-1741/2021 | EPI_ISL_3543165 | 2021-08-20      |
| hCoV-19/Japan/IC-1742/2021 | EPI_ISL_3543155 | 2021-08-20      |
| hCoV-19/Japan/IC-1743/2021 | EPI_ISL_3543156 | 2021-08-20      |
| hCoV-19/Japan/IC-1744/2021 | EPI_ISL_3543146 | 2021-08-20      |
| hCoV-19/Japan/IC-1745/2021 | EPI_ISL_3543133 | 2021-08-20      |
| hCoV-19/Japan/IC-1746/2021 | EPI_ISL_3543134 | 2021-08-20      |
| hCoV-19/Japan/IC-1747/2021 | EPI_ISL_3543135 | 2021-08-20      |
| hCoV-19/Japan/IC-1748/2021 | EPI_ISL_3543136 | 2021-08-20      |
| hCoV-19/Japan/IC-1749/2021 | EPI_ISL_3543137 | 2021-08-20      |
| hCoV-19/Japan/IC-1750/2021 | EPI_ISL_3543174 | 2021-08-20      |
| hCoV-19/Japan/IC-1751/2021 | EPI_ISL_3543175 | 2021-08-20      |
| hCoV-19/Japan/IC-1752/2021 | EPI_ISL_3543176 | 2021-08-20      |
| hCoV-19/Japan/IC-1753/2021 | EPI_ISL_3543177 | 2021-08-20      |
| hCoV-19/Japan/IC-1754/2021 | EPI_ISL_3543166 | 2021-08-20      |
| hCoV-19/Japan/IC-1755/2021 | EPI_ISL_3543167 | 2021-08-20      |
| hCoV-19/Japan/IC-1756/2021 | EPI_ISL_3543157 | 2021-08-20      |
| hCoV-19/Japan/IC-1757/2021 | EPI_ISL_3543158 | 2021-08-20      |
| hCoV-19/Japan/IC-1758/2021 | EPI_ISL_3543159 | 2021-08-20      |
| hCoV-19/Japan/IC-1759/2021 | EPI_ISL_3543147 | 2021-08-20      |
| hCoV-19/Japan/IC-1760/2021 | EPI_ISL_3543148 | 2021-08-20      |
| hCoV-19/Japan/IC-1761/2021 | EPI_ISL_3543149 | 2021-08-20      |
| hCoV-19/Japan/IC-1762/2021 | EPI_ISL_3543150 | 2021-08-20      |
| hCoV-19/Japan/IC-1763/2021 | EPI_ISL_3543138 | 2021-08-20      |
| hCoV-19/Japan/IC-1764/2021 | EPI_ISL_3543139 | 2021-08-20      |
| hCoV-19/Japan/IC-1765/2021 | EPI_ISL_3543140 | 2021-08-20      |
| hCoV-19/Japan/IC-1766/2021 | EPI_ISL_3543123 | 2021-08-20      |
| hCoV-19/Japan/IC-1767/2021 | EPI_ISL_3543124 | 2021-08-20      |
| hCoV-19/Japan/IC-1768/2021 | EPI_ISL_3543125 | 2021-08-20      |
| hCoV-19/Japan/IC-1769/2021 | EPI_ISL_3543126 | 2021-08-20      |
| hCoV-19/Japan/IC-1770/2021 | EPI_ISL_3543127 | 2021-08-20      |
| hCoV-19/Japan/IC-1771/2021 | EPI_ISL_3543128 | 2021-08-20      |
| hCoV-19/Japan/IC-1772/2021 | EPI_ISL_3543115 | 2021-08-20      |
| hCoV-19/Japan/IC-1773/2021 | EPI_ISL_3543116 | 2021-08-20      |
| hCoV-19/Japan/IC-1774/2021 | EPI_ISL_3543117 | 2021-08-20      |
| hCoV-19/Japan/IC-1775/2021 | EPI_ISL_3543118 | 2021-08-20      |
| hCoV-19/Japan/IC-1776/2021 | EPI_ISL_3543119 | 2021-08-20      |
| hCoV-19/Japan/IC-1777/2021 | EPI_ISL_3543129 | 2021-08-20      |
| hCoV-19/Japan/IC-1778/2021 | EPI_ISL_3543130 | 2021-08-20      |
| hCoV-19/Japan/IC-1779/2021 | EPI_ISL_3543131 | 2021-08-20      |
| hCoV-19/Japan/IC-1780/2021 | EPI_ISL_3543120 | 2021-08-20      |

| virus_name                                | epiID           | submission_date |
|-------------------------------------------|-----------------|-----------------|
| hCoV-19/Japan/IC-1781/2021                | EPI_ISL_3543121 | 2021-08-20      |
| hCoV-19/Japan/IC-1782/2021                | EPI_ISL_3543122 | 2021-08-20      |
| hCoV-19/Japan/NIID-patho-20-247-1P0/2020  | EPI_ISL_3541222 | 2021-08-20      |
| hCoV-19/Japan/NIID-patho-20-312-36P0/2020 | EPI_ISL_3541223 | 2021-08-20      |
| hCoV-19/Japan/NIID-patho-20-312-38P0/2020 | EPI_ISL_3541224 | 2021-08-20      |
| hCoV-19/Japan/NIID-patho-20-312-39P0/2020 | EPI_ISL_3541225 | 2021-08-20      |
| hCoV-19/Japan/NIID-patho-21-144-18/2021   | EPI_ISL_3541226 | 2021-08-20      |
| hCoV-19/Japan/NIID-patho-21-144-35/2021   | EPI_ISL_3541227 | 2021-08-20      |
| hCoV-19/Japan/NIID-patho-21-144-41/2021   | EPI_ISL_3541228 | 2021-08-20      |
| hCoV-19/Japan/NIID-patho-21-144-48/2021   | EPI_ISL_3541229 | 2021-08-20      |
| hCoV-19/Japan/NIID-patho-21-180-8/2021    | EPI_ISL_3541230 | 2021-08-20      |
| hCoV-19/Japan/NIID-patho-21-189-2/2021    | EPI_ISL_3541231 | 2021-08-20      |
| hCoV-19/Japan/NIID-patho-CB21-009P0/2021  | EPI_ISL_3541232 | 2021-08-20      |
| hCoV-19/Japan/NIID-patho-CB21-033P0/2021  | EPI_ISL_3541233 | 2021-08-20      |
| hCoV-19/Japan/NIID-patho-CB21-059P0/2021  | EPI_ISL_3541234 | 2021-08-20      |
| hCoV-19/Japan/NIID-patho-CB21-062P0/2021  | EPI_ISL_3541235 | 2021-08-20      |
| hCoV-19/Japan/NIID-patho-CB21-075P0/2021  | EPI_ISL_3541236 | 2021-08-20      |
| hCoV-19/Japan/NIID-patho-CB21-077P0/2021  | EPI_ISL_3541237 | 2021-08-20      |
| hCoV-19/Japan/NIID-patho-CB21-078P0/2021  | EPI_ISL_3541238 | 2021-08-20      |
| hCoV-19/Japan/NIID-patho-CB21-094P0/2021  | EPI_ISL_3541239 | 2021-08-20      |
| hCoV-19/Japan/NIID-patho-CB21-095P0/2021  | EPI_ISL_3541240 | 2021-08-20      |
| hCoV-19/Japan/NIID-patho-CB21-102P0/2021  | EPI_ISL_3541241 | 2021-08-20      |
| hCoV-19/Japan/NIID-patho-CB21-103P0/2021  | EPI_ISL_3541242 | 2021-08-20      |
| hCoV-19/Japan/NIID-patho-CB21-108P0/2021  | EPI_ISL_3541243 | 2021-08-20      |
| hCoV-19/Japan/NIID-patho-CB21-110P0/2021  | EPI_ISL_3541244 | 2021-08-20      |
| hCoV-19/Japan/NIID-patho-CB21-111P0/2021  | EPI_ISL_3541245 | 2021-08-20      |
| hCoV-19/Japan/NIID-patho-CB21-113P0/2021  | EPI_ISL_3541246 | 2021-08-20      |
| hCoV-19/Japan/NIID-patho-CB21-115P0/2021  | EPI_ISL_3541247 | 2021-08-20      |
| hCoV-19/Japan/NIID-patho-CB21-125P0/2021  | EPI_ISL_3541248 | 2021-08-20      |
| hCoV-19/Japan/NIID-patho-CS4-15P0/2021    | EPI_ISL_3541249 | 2021-08-20      |
| hCoV-19/Japan/NIID-patho-CS4-18P0/2021    | EPI_ISL_3541250 | 2021-08-20      |
| hCoV-19/Japan/NIID-patho-CS4-20P0/2021    | EPI_ISL_3541251 | 2021-08-20      |
| hCoV-19/Japan/NIID-patho-CS4-21P0/2021    | EPI_ISL_3541252 | 2021-08-20      |
| hCoV-19/Japan/NIID-patho-CS4-26P0/2021    | EPI_ISL_3541253 | 2021-08-20      |
| hCoV-19/Japan/NIID-patho-CS4-28P0/2021    | EPI_ISL_3541254 | 2021-08-20      |
| hCoV-19/Japan/NIID-patho-CS4-9P0/2021     | EPI_ISL_3541255 | 2021-08-20      |
| hCoV-19/Japan/YCH0559/2021                | EPI_ISL_3534412 | 2021-08-20      |
| hCoV-19/Japan/YCH0560/2021                | EPI_ISL_3534414 | 2021-08-20      |
| hCoV-19/Japan/YCH0561/2021                | EPI_ISL_3534416 | 2021-08-20      |
| hCoV-19/Japan/YCH0562/2021                | EPI_ISL_3534418 | 2021-08-20      |
| hCoV-19/Japan/YCH0563/2021                | EPI_ISL_3534420 | 2021-08-20      |
| hCoV-19/Japan/YCH0564/2021                | EPI_ISL_3534422 | 2021-08-20      |
| hCoV-19/Japan/YCH0565/2021                | EPI_ISL_3534424 | 2021-08-20      |
| hCoV-19/Japan/YCH0566/2021                | EPI_ISL_3534426 | 2021-08-20      |
| hCoV-19/Japan/YCH0567/2021                | EPI_ISL_3534428 | 2021-08-20      |
| hCoV-19/Japan/YCH0568/2021                | EPI_ISL_3534430 | 2021-08-20      |
| hCoV-19/Japan/YCH0569/2021                | EPI_ISL_3534432 | 2021-08-20      |
| hCoV-19/Japan/YCH0570/2021                | EPI_ISL_3534434 | 2021-08-20      |
| hCoV-19/Japan/YCH0571/2021                | EPI_ISL_3534436 | 2021-08-20      |
| hCoV-19/Japan/YCH0572/2021                | EPI_ISL_3534438 | 2021-08-20      |
| hCoV-19/Japan/YCH0573/2021                | EPI_ISL_3534440 | 2021-08-20      |
| hCoV-19/Japan/YCH0574/2021                | EPI_ISL_3534442 | 2021-08-20      |
| hCoV-19/Japan/OPHO-ky-10-11/2021          | EPI_ISL_3568731 | 2021-08-23      |
| hCoV-19/Japan/OPHO-ky10-1/2021            | EPI_ISL_3568625 | 2021-08-23      |

| virus_name                      | epiID           | submission_date |
|---------------------------------|-----------------|-----------------|
| hCoV-19/Japan/OPHO-ky10-13/2021 | EPI_ISL_3568732 | 2021-08-23      |
| hCoV-19/Japan/OPHO-ky10-14/2021 | EPI_ISL_3568733 | 2021-08-23      |
| hCoV-19/Japan/OPHO-ky10-16/2021 | EPI_ISL_3568734 | 2021-08-23      |
| hCoV-19/Japan/OPHO-ky10-2/2021  | EPI_ISL_3568844 | 2021-08-23      |
| hCoV-19/Japan/OPHO-ky10-4/2021  | EPI_ISL_3568845 | 2021-08-23      |
| hCoV-19/Japan/OPHO-ky10-6/2021  | EPI_ISL_3568627 | 2021-08-23      |
| hCoV-19/Japan/OPHO-ky10-8/2021  | EPI_ISL_3568867 | 2021-08-23      |
| hCoV-19/Japan/OPHO-ky10-9/2021  | EPI_ISL_3568639 | 2021-08-23      |
| hCoV-19/Japan/OPHO-M23/2021     | EPI_ISL_3568868 | 2021-08-23      |
| hCoV-19/Japan/OPHO-M24/2021     | EPI_ISL_3568870 | 2021-08-23      |
| hCoV-19/Japan/CV00005609/2021   | EPI_ISL_3655349 | 2021-08-24      |
| hCoV-19/Japan/CV00005773/2021   | EPI_ISL_3655365 | 2021-08-24      |
| hCoV-19/Japan/CV00005925/2021   | EPI_ISL_3655413 | 2021-08-24      |
| hCoV-19/Japan/CV00006195/2021   | EPI_ISL_3655366 | 2021-08-24      |
| hCoV-19/Japan/CV00006641/2021   | EPI_ISL_3655344 | 2021-08-24      |
| hCoV-19/Japan/CV00038551/2021   | EPI_ISL_3655460 | 2021-08-24      |
| hCoV-19/Japan/CV00039051/2021   | EPI_ISL_3655470 | 2021-08-24      |
| hCoV-19/Japan/CV00040691/2021   | EPI_ISL_3655360 | 2021-08-24      |
| hCoV-19/Japan/CV00042126/2021   | EPI_ISL_3655353 | 2021-08-24      |
| hCoV-19/Japan/CV00043178/2021   | EPI_ISL_3655409 | 2021-08-24      |
| hCoV-19/Japan/CV00046376/2021   | EPI_ISL_3655477 | 2021-08-24      |
| hCoV-19/Japan/CV00046422/2021   | EPI_ISL_3655421 | 2021-08-24      |
| hCoV-19/Japan/CV00046512/2021   | EPI_ISL_3655379 | 2021-08-24      |
| hCoV-19/Japan/CV00046822/2021   | EPI_ISL_3655414 | 2021-08-24      |
| hCoV-19/Japan/CV00046880/2021   | EPI_ISL_3655410 | 2021-08-24      |
| hCoV-19/Japan/CV00047254/2021   | EPI_ISL_3655357 | 2021-08-24      |
| hCoV-19/Japan/CV00047276/2021   | EPI_ISL_3655427 | 2021-08-24      |
| hCoV-19/Japan/CV00047392/2021   | EPI_ISL_3655397 | 2021-08-24      |
| hCoV-19/Japan/CV00047565/2021   | EPI_ISL_3655393 | 2021-08-24      |
| hCoV-19/Japan/CV00047653/2021   | EPI_ISL_3655474 | 2021-08-24      |
| hCoV-19/Japan/CV00047773/2021   | EPI_ISL_3655437 | 2021-08-24      |
| hCoV-19/Japan/CV00047869/2021   | EPI_ISL_3655411 | 2021-08-24      |
| hCoV-19/Japan/CV00049531/2021   | EPI_ISL_3655382 | 2021-08-24      |
| hCoV-19/Japan/CV00049646/2021   | EPI_ISL_3655428 | 2021-08-24      |
| hCoV-19/Japan/CV00050921/2021   | EPI_ISL_3655345 | 2021-08-24      |
| hCoV-19/Japan/CV00052024/2021   | EPI_ISL_3655415 | 2021-08-24      |
| hCoV-19/Japan/CV00052220/2021   | EPI_ISL_3655406 | 2021-08-24      |
| hCoV-19/Japan/CV00052568/2021   | EPI_ISL_3655383 | 2021-08-24      |
| hCoV-19/Japan/CV00052647/2021   | EPI_ISL_3655374 | 2021-08-24      |
| hCoV-19/Japan/CV00052818/2021   | EPI_ISL_3655372 | 2021-08-24      |
| hCoV-19/Japan/CV00052882/2021   | EPI_ISL_3655448 | 2021-08-24      |
| hCoV-19/Japan/CV00054000/2021   | EPI_ISL_3655358 | 2021-08-24      |
| hCoV-19/Japan/CV00054001/2021   | EPI_ISL_3655362 | 2021-08-24      |
| hCoV-19/Japan/CV00054825/2021   | EPI_ISL_3655375 | 2021-08-24      |
| hCoV-19/Japan/CV00054827/2021   | EPI_ISL_3655367 | 2021-08-24      |
| hCoV-19/Japan/CV00055649/2021   | EPI_ISL_3655398 | 2021-08-24      |
| hCoV-19/Japan/CV00056017/2021   | EPI_ISL_3655399 | 2021-08-24      |
| hCoV-19/Japan/CV00056740/2021   | EPI_ISL_3655438 | 2021-08-24      |
| hCoV-19/Japan/CV00056788/2021   | EPI_ISL_3655412 | 2021-08-24      |
| hCoV-19/Japan/CV00059293/2021   | EPI_ISL_3655407 | 2021-08-24      |
| hCoV-19/Japan/CV00059711/2021   | EPI_ISL_3655432 | 2021-08-24      |
| hCoV-19/Japan/CV00059976/2021   | EPI_ISL_3655451 | 2021-08-24      |
| hCoV-19/Japan/CV00061124/2021   | EPI_ISL_3655384 | 2021-08-24      |
| hCoV-19/Japan/CV00062354/2021   | EPI_ISL_3655385 | 2021-08-24      |

| virus_name                    | epiID           | submission_date |
|-------------------------------|-----------------|-----------------|
| hCoV-19/Japan/CV00062389/2021 | EPI_ISL_3655386 | 2021-08-24      |
| hCoV-19/Japan/CV00062985/2021 | EPI_ISL_3655394 | 2021-08-24      |
| hCoV-19/Japan/CV00063007/2021 | EPI_ISL_3655441 | 2021-08-24      |
| hCoV-19/Japan/CV00063061/2021 | EPI_ISL_3655452 | 2021-08-24      |
| hCoV-19/Japan/CV00063583/2021 | EPI_ISL_3655387 | 2021-08-24      |
| hCoV-19/Japan/CV00063601/2021 | EPI_ISL_3655449 | 2021-08-24      |
| hCoV-19/Japan/CV00063678/2021 | EPI_ISL_3655388 | 2021-08-24      |
| hCoV-19/Japan/CV00063740/2021 | EPI_ISL_3655454 | 2021-08-24      |
| hCoV-19/Japan/CV00064150/2021 | EPI_ISL_3655416 | 2021-08-24      |
| hCoV-19/Japan/CV00064300/2021 | EPI_ISL_3655370 | 2021-08-24      |
| hCoV-19/Japan/CV00064517/2021 | EPI_ISL_3655373 | 2021-08-24      |
| hCoV-19/Japan/CV00064702/2021 | EPI_ISL_3655377 | 2021-08-24      |
| hCoV-19/Japan/CV00064896/2021 | EPI_ISL_3655400 | 2021-08-24      |
| hCoV-19/Japan/CV00065450/2021 | EPI_ISL_3655389 | 2021-08-24      |
| hCoV-19/Japan/CV00065823/2021 | EPI_ISL_3655442 | 2021-08-24      |
| hCoV-19/Japan/CV00065970/2021 | EPI_ISL_3655433 | 2021-08-24      |
| hCoV-19/Japan/CV00066058/2021 | EPI_ISL_3655429 | 2021-08-24      |
| hCoV-19/Japan/CV00066078/2021 | EPI_ISL_3655434 | 2021-08-24      |
| hCoV-19/Japan/CV00066380/2021 | EPI_ISL_3655417 | 2021-08-24      |
| hCoV-19/Japan/CV00066405/2021 | EPI_ISL_3655418 | 2021-08-24      |
| hCoV-19/Japan/CV00066448/2021 | EPI_ISL_3655419 | 2021-08-24      |
| hCoV-19/Japan/CV00066513/2021 | EPI_ISL_3655443 | 2021-08-24      |
| hCoV-19/Japan/CV00066646/2021 | EPI_ISL_3655361 | 2021-08-24      |
| hCoV-19/Japan/CV00066855/2021 | EPI_ISL_3655395 | 2021-08-24      |
| hCoV-19/Japan/CV00066905/2021 | EPI_ISL_3655439 | 2021-08-24      |
| hCoV-19/Japan/CV00067421/2021 | EPI_ISL_3655455 | 2021-08-24      |
| hCoV-19/Japan/CV00068854/2021 | EPI_ISL_3655456 | 2021-08-24      |
| hCoV-19/Japan/CV00069080/2021 | EPI_ISL_3655390 | 2021-08-24      |
| hCoV-19/Japan/CV00069347/2021 | EPI_ISL_3655440 | 2021-08-24      |
| hCoV-19/Japan/CV00071774/2021 | EPI_ISL_3655401 | 2021-08-24      |
| hCoV-19/Japan/CV00072007/2021 | EPI_ISL_3655402 | 2021-08-24      |
| hCoV-19/Japan/CV00072037/2021 | EPI_ISL_3655403 | 2021-08-24      |
| hCoV-19/Japan/CV00072809/2021 | EPI_ISL_3655444 | 2021-08-24      |
| hCoV-19/Japan/CV00075386/2021 | EPI_ISL_3655364 | 2021-08-24      |
| hCoV-19/Japan/CV00075987/2021 | EPI_ISL_3655478 | 2021-08-24      |
| hCoV-19/Japan/CV00077341/2021 | EPI_ISL_3655469 | 2021-08-24      |
| hCoV-19/Japan/CV00078222/2021 | EPI_ISL_3655430 | 2021-08-24      |
| hCoV-19/Japan/CV00078223/2021 | EPI_ISL_3655431 | 2021-08-24      |
| hCoV-19/Japan/CV00078406/2021 | EPI_ISL_3655422 | 2021-08-24      |
| hCoV-19/Japan/CV00079502/2021 | EPI_ISL_3655435 | 2021-08-24      |
| hCoV-19/Japan/CV00079782/2021 | EPI_ISL_3655453 | 2021-08-24      |
| hCoV-19/Japan/CV00080495/2021 | EPI_ISL_3655354 | 2021-08-24      |
| hCoV-19/Japan/CV00081721/2021 | EPI_ISL_3655404 | 2021-08-24      |
| hCoV-19/Japan/CV00083453/2021 | EPI_ISL_3655350 | 2021-08-24      |
| hCoV-19/Japan/CV00084587/2021 | EPI_ISL_3655378 | 2021-08-24      |
| hCoV-19/Japan/CV00084632/2021 | EPI_ISL_3655371 | 2021-08-24      |
| hCoV-19/Japan/CV00084911/2021 | EPI_ISL_3655368 | 2021-08-24      |
| hCoV-19/Japan/CV00085802/2021 | EPI_ISL_3655376 | 2021-08-24      |
| hCoV-19/Japan/CV00087463/2021 | EPI_ISL_3655405 | 2021-08-24      |
| hCoV-19/Japan/CV00087546/2021 | EPI_ISL_3655380 | 2021-08-24      |
| hCoV-19/Japan/CV00087692/2021 | EPI_ISL_3655459 | 2021-08-24      |
| hCoV-19/Japan/CV00087794/2021 | EPI_ISL_3655381 | 2021-08-24      |
| hCoV-19/Japan/CV00087930/2021 | EPI_ISL_3655391 | 2021-08-24      |
| hCoV-19/Japan/CV00089003/2021 | EPI_ISL_3655462 | 2021-08-24      |

| virus_name                    | epiID           | submission_date |
|-------------------------------|-----------------|-----------------|
| hCoV-19/Japan/CV00089005/2021 | EPI_ISL_3655463 | 2021-08-24      |
| hCoV-19/Japan/CV00089010/2021 | EPI_ISL_3655464 | 2021-08-24      |
| hCoV-19/Japan/CV00089011/2021 | EPI_ISL_3655465 | 2021-08-24      |
| hCoV-19/Japan/CV00106473/2021 | EPI_ISL_3655458 | 2021-08-24      |
| hCoV-19/Japan/MV00005281/2021 | EPI_ISL_3655348 | 2021-08-24      |
| hCoV-19/Japan/MV00010697/2021 | EPI_ISL_3655346 | 2021-08-24      |
| hCoV-19/Japan/MV00010818/2021 | EPI_ISL_3655347 | 2021-08-24      |
| hCoV-19/Japan/MV00010858/2021 | EPI_ISL_3655363 | 2021-08-24      |
| hCoV-19/Japan/MV00010886/2021 | EPI_ISL_3655355 | 2021-08-24      |
| hCoV-19/Japan/MV00011241/2021 | EPI_ISL_3655392 | 2021-08-24      |
| hCoV-19/Japan/MV00011276/2021 | EPI_ISL_3655396 | 2021-08-24      |
| hCoV-19/Japan/MV00011291/2021 | EPI_ISL_3655408 | 2021-08-24      |
| hCoV-19/Japan/MV00011320/2021 | EPI_ISL_3655423 | 2021-08-24      |
| hCoV-19/Japan/MV00011321/2021 | EPI_ISL_3655424 | 2021-08-24      |
| hCoV-19/Japan/MV00011323/2021 | EPI_ISL_3655425 | 2021-08-24      |
| hCoV-19/Japan/MV00011331/2021 | EPI_ISL_3655426 | 2021-08-24      |
| hCoV-19/Japan/MV00011502/2021 | EPI_ISL_3655445 | 2021-08-24      |
| hCoV-19/Japan/MV00011505/2021 | EPI_ISL_3655446 | 2021-08-24      |
| hCoV-19/Japan/MV00011515/2021 | EPI_ISL_3655447 | 2021-08-24      |
| hCoV-19/Japan/MV00011517/2021 | EPI_ISL_3655450 | 2021-08-24      |
| hCoV-19/Japan/MV00011535/2021 | EPI_ISL_3655457 | 2021-08-24      |
| hCoV-19/Japan/MV00011571/2021 | EPI_ISL_3655461 | 2021-08-24      |
| hCoV-19/Japan/MV00011581/2021 | EPI_ISL_3655466 | 2021-08-24      |
| hCoV-19/Japan/MV00011582/2021 | EPI_ISL_3655467 | 2021-08-24      |
| hCoV-19/Japan/MV00011599/2021 | EPI_ISL_3655468 | 2021-08-24      |
| hCoV-19/Japan/MV00011609/2021 | EPI_ISL_3655471 | 2021-08-24      |
| hCoV-19/Japan/MV00011630/2021 | EPI_ISL_3655473 | 2021-08-24      |
| hCoV-19/Japan/MV00011634/2021 | EPI_ISL_3655475 | 2021-08-24      |
| hCoV-19/Japan/MV00011641/2021 | EPI_ISL_3655476 | 2021-08-24      |
| hCoV-19/Japan/MV00014747/2021 | EPI_ISL_3655351 | 2021-08-24      |
| hCoV-19/Japan/MV00014751/2021 | EPI_ISL_3655356 | 2021-08-24      |
| hCoV-19/Japan/MV00014771/2021 | EPI_ISL_3655359 | 2021-08-24      |
| hCoV-19/Japan/MV00014782/2021 | EPI_ISL_3655369 | 2021-08-24      |
| hCoV-19/Japan/MV00015348/2021 | EPI_ISL_3655352 | 2021-08-24      |
| hCoV-19/Japan/MV00015496/2021 | EPI_ISL_3655420 | 2021-08-24      |
| hCoV-19/Japan/MV00016182/2021 | EPI_ISL_3655436 | 2021-08-24      |
| hCoV-19/Japan/MV00016413/2021 | EPI_ISL_3655472 | 2021-08-24      |
| hCoV-19/Japan/RIMD00306/2021  | EPI_ISL_3689371 | 2021-08-25      |
| hCoV-19/Japan/TKYK20623/2021  | EPI_ISL_3673682 | 2021-08-25      |
| hCoV-19/Japan/TKYK20785/2021  | EPI_ISL_3673683 | 2021-08-25      |
| hCoV-19/Japan/TKYK20786/2021  | EPI_ISL_3673684 | 2021-08-25      |
| hCoV-19/Japan/TKYK20856/2021  | EPI_ISL_3673685 | 2021-08-25      |
| hCoV-19/Japan/TKYK20958/2021  | EPI_ISL_3673690 | 2021-08-25      |
| hCoV-19/Japan/TKYK20959/2021  | EPI_ISL_3673691 | 2021-08-25      |
| hCoV-19/Japan/TKYK20964/2021  | EPI_ISL_3673692 | 2021-08-25      |
| hCoV-19/Japan/TKYK21063/2021  | EPI_ISL_3673693 | 2021-08-25      |
| hCoV-19/Japan/TKYK21064/2021  | EPI_ISL_3673694 | 2021-08-25      |
| hCoV-19/Japan/TKYK21231/2021  | EPI_ISL_3673695 | 2021-08-25      |
| hCoV-19/Japan/TKYK21527/2021  | EPI_ISL_3673696 | 2021-08-25      |
| hCoV-19/Japan/TKYK25111/2021  | EPI_ISL_3673697 | 2021-08-25      |
| hCoV-19/Japan/TKYK25338/2021  | EPI_ISL_3673698 | 2021-08-25      |
| hCoV-19/Japan/TKYK25470/2021  | EPI_ISL_3673701 | 2021-08-25      |
| hCoV-19/Japan/TKYK25471/2021  | EPI_ISL_3673702 | 2021-08-25      |
| hCoV-19/Japan/TKYK25497/2021  | EPI_ISL_3673703 | 2021-08-25      |



| virus_name                      | epiID           | submission_date |
|---------------------------------|-----------------|-----------------|
| hCoV-19/Japan/TKYK26070/2021    | EPI_ISL_3673704 | 2021-08-25      |
| hCoV-19/Japan/TKYS00441/2021    | EPI_ISL_3673686 | 2021-08-25      |
| hCoV-19/Japan/TKYS00442/2021    | EPI_ISL_3673687 | 2021-08-25      |
| hCoV-19/Japan/TKYS00444/2021    | EPI_ISL_3673688 | 2021-08-25      |
| hCoV-19/Japan/TKYS00445/2021    | EPI_ISL_3673689 | 2021-08-25      |
| hCoV-19/Japan/TKYS00467/2021    | EPI_ISL_3673699 | 2021-08-25      |
| hCoV-19/Japan/TKYS00468/2021    | EPI_ISL_3673700 | 2021-08-25      |
| hCoV-19/Japan/OPHO-ky11-11/2021 | EPI_ISL_3707870 | 2021-08-26      |
| hCoV-19/Japan/OPHO-ky11-1/2021  | EPI_ISL_3707862 | 2021-08-26      |
| hCoV-19/Japan/OPHO-ky11-12/2021 | EPI_ISL_3707871 | 2021-08-26      |
| hCoV-19/Japan/OPHO-ky11-14/2021 | EPI_ISL_3707872 | 2021-08-26      |
| hCoV-19/Japan/OPHO-ky11-15/2021 | EPI_ISL_3707873 | 2021-08-26      |
| hCoV-19/Japan/OPHO-ky11-2/2021  | EPI_ISL_3707863 | 2021-08-26      |
| hCoV-19/Japan/OPHO-ky11-3/2021  | EPI_ISL_3707864 | 2021-08-26      |
| hCoV-19/Japan/OPHO-Ky11-4/2021  | EPI_ISL_3707865 | 2021-08-26      |
| hCoV-19/Japan/OPHO-ky11-5/2021  | EPI_ISL_3707866 | 2021-08-26      |
| hCoV-19/Japan/OPHO-ky11-6/2021  | EPI_ISL_3707867 | 2021-08-26      |
| hCoV-19/Japan/OPHO-ky11-7/2021  | EPI_ISL_3707868 | 2021-08-26      |
| hCoV-19/Japan/OPHO-ky11-8/2021  | EPI_ISL_3707869 | 2021-08-26      |
| hCoV-19/Japan/OPHO-M20/2021     | EPI_ISL_3707875 | 2021-08-26      |
| hCoV-19/Japan/OPHO-M25/2021     | EPI_ISL_3707876 | 2021-08-26      |
| hCoV-19/Japan/OPHO-M27/2021     | EPI_ISL_3707878 | 2021-08-26      |
| hCoV-19/Japan/YCH0575/2021      | EPI_ISL_3706138 | 2021-08-26      |
| hCoV-19/Japan/YCH0576/2021      | EPI_ISL_3706142 | 2021-08-26      |
| hCoV-19/Japan/YCH0577/2021      | EPI_ISL_3706146 | 2021-08-26      |
| hCoV-19/Japan/YCH0578/2021      | EPI_ISL_3706149 | 2021-08-26      |
| hCoV-19/Japan/YCH0579/2021      | EPI_ISL_3706153 | 2021-08-26      |
| hCoV-19/Japan/YCH0580/2021      | EPI_ISL_3706157 | 2021-08-26      |
| hCoV-19/Japan/YCH0581/2021      | EPI_ISL_3706160 | 2021-08-26      |
| hCoV-19/Japan/YCH0582/2021      | EPI_ISL_3706164 | 2021-08-26      |
| hCoV-19/Japan/YCH0583/2021      | EPI_ISL_3706168 | 2021-08-26      |
| hCoV-19/Japan/YCH0584/2021      | EPI_ISL_3706172 | 2021-08-26      |
| hCoV-19/Japan/YCH0585/2021      | EPI_ISL_3706175 | 2021-08-26      |
| hCoV-19/Japan/YCH0586/2021      | EPI_ISL_3706179 | 2021-08-26      |
| hCoV-19/Japan/YCH0587/2021      | EPI_ISL_3706183 | 2021-08-26      |
| hCoV-19/Japan/YCH0588/2021      | EPI_ISL_3706191 | 2021-08-26      |
| hCoV-19/Japan/YCH0589/2021      | EPI_ISL_3706195 | 2021-08-26      |
| hCoV-19/Japan/YCH0590/2021      | EPI_ISL_3706199 | 2021-08-26      |
| hCoV-19/Japan/CV00022528/2021   | EPI_ISL_3737277 | 2021-08-27      |
| hCoV-19/Japan/CV00022529/2021   | EPI_ISL_3737314 | 2021-08-27      |
| hCoV-19/Japan/CV00022534/2021   | EPI_ISL_3737290 | 2021-08-27      |
| hCoV-19/Japan/CV00022991/2021   | EPI_ISL_3737279 | 2021-08-27      |
| hCoV-19/Japan/CV00025481/2021   | EPI_ISL_3737309 | 2021-08-27      |
| hCoV-19/Japan/CV00025492/2021   | EPI_ISL_3737284 | 2021-08-27      |
| hCoV-19/Japan/CV00036856/2020   | EPI_ISL_3737316 | 2021-08-27      |
| hCoV-19/Japan/CV00037161/2021   | EPI_ISL_3737289 | 2021-08-27      |
| hCoV-19/Japan/CV00037536/2021   | EPI_ISL_3737291 | 2021-08-27      |
| hCoV-19/Japan/CV00037537/2020   | EPI_ISL_3737287 | 2021-08-27      |
| hCoV-19/Japan/CV00037583/2020   | EPI_ISL_3737313 | 2021-08-27      |
| hCoV-19/Japan/CV00037588/2020   | EPI_ISL_3737311 | 2021-08-27      |
| hCoV-19/Japan/CV00040058/2021   | EPI_ISL_3737271 | 2021-08-27      |
| hCoV-19/Japan/CV00042270/2021   | EPI_ISL_3737297 | 2021-08-27      |
| hCoV-19/Japan/CV00043932/2021   | EPI_ISL_3737317 | 2021-08-27      |
| hCoV-19/Japan/CV00047814/2021   | EPI_ISL_3737307 | 2021-08-27      |

| virus_name                    | epiID           | submission_date |
|-------------------------------|-----------------|-----------------|
| hCoV-19/Japan/CV00048749/2021 | EPI_ISL_3737293 | 2021-08-27      |
| hCoV-19/Japan/CV00051275/2021 | EPI_ISL_3737301 | 2021-08-27      |
| hCoV-19/Japan/CV00051357/2021 | EPI_ISL_3737312 | 2021-08-27      |
| hCoV-19/Japan/CV00054437/2021 | EPI_ISL_3737300 | 2021-08-27      |
| hCoV-19/Japan/CV00080686/2021 | EPI_ISL_3737270 | 2021-08-27      |
| hCoV-19/Japan/CV00082365/2021 | EPI_ISL_3737292 | 2021-08-27      |
| hCoV-19/Japan/CV00082500/2021 | EPI_ISL_3737320 | 2021-08-27      |
| hCoV-19/Japan/CV00082526/2020 | EPI_ISL_3737302 | 2021-08-27      |
| hCoV-19/Japan/CV00082658/2021 | EPI_ISL_3737306 | 2021-08-27      |
| hCoV-19/Japan/CV00083203/2021 | EPI_ISL_3737298 | 2021-08-27      |
| hCoV-19/Japan/CV00083553/2021 | EPI_ISL_3737278 | 2021-08-27      |
| hCoV-19/Japan/CV00085310/2021 | EPI_ISL_3737275 | 2021-08-27      |
| hCoV-19/Japan/CV00085315/2021 | EPI_ISL_3737295 | 2021-08-27      |
| hCoV-19/Japan/CV00085730/2021 | EPI_ISL_3737273 | 2021-08-27      |
| hCoV-19/Japan/CV00085731/2021 | EPI_ISL_3737305 | 2021-08-27      |
| hCoV-19/Japan/CV00086923/2021 | EPI_ISL_3737276 | 2021-08-27      |
| hCoV-19/Japan/CV00087041/2021 | EPI_ISL_3737283 | 2021-08-27      |
| hCoV-19/Japan/CV00090311/2021 | EPI_ISL_3737288 | 2021-08-27      |
| hCoV-19/Japan/CV00090342/2020 | EPI_ISL_3737280 | 2021-08-27      |
| hCoV-19/Japan/CV00090757/2020 | EPI_ISL_3737269 | 2021-08-27      |
| hCoV-19/Japan/CV00090823/2020 | EPI_ISL_3737319 | 2021-08-27      |
| hCoV-19/Japan/CV00090826/2020 | EPI_ISL_3737310 | 2021-08-27      |
| hCoV-19/Japan/CV00090891/2020 | EPI_ISL_3737318 | 2021-08-27      |
| hCoV-19/Japan/CV00090894/2020 | EPI_ISL_3737303 | 2021-08-27      |
| hCoV-19/Japan/CV00090896/2020 | EPI_ISL_3737282 | 2021-08-27      |
| hCoV-19/Japan/CV00090897/2021 | EPI_ISL_3737304 | 2021-08-27      |
| hCoV-19/Japan/CV00091775/2021 | EPI_ISL_3737272 | 2021-08-27      |
| hCoV-19/Japan/CV00093172/2021 | EPI_ISL_3737315 | 2021-08-27      |
| hCoV-19/Japan/CV00096469/2020 | EPI_ISL_3737299 | 2021-08-27      |
| hCoV-19/Japan/CV00097097/2021 | EPI_ISL_3737274 | 2021-08-27      |
| hCoV-19/Japan/CV00097099/2021 | EPI_ISL_3737281 | 2021-08-27      |
| hCoV-19/Japan/CV00097174/2020 | EPI_ISL_3737308 | 2021-08-27      |
| hCoV-19/Japan/CV00098960/2021 | EPI_ISL_3737285 | 2021-08-27      |
| hCoV-19/Japan/CV00098997/2021 | EPI_ISL_3737286 | 2021-08-27      |
| hCoV-19/Japan/CV00099332/2021 | EPI_ISL_3737296 | 2021-08-27      |
| hCoV-19/Japan/CV00150713/2021 | EPI_ISL_3737294 | 2021-08-27      |
| hCoV-19/Japan/OPHO-M26-2/2021 | EPI_ISL_3722428 | 2021-08-27      |
| hCoV-19/Japan/IC-1783/2021    | EPI_ISL_3769583 | 2021-08-30      |
| hCoV-19/Japan/IC-1784/2021    | EPI_ISL_3769584 | 2021-08-30      |
| hCoV-19/Japan/IC-1785/2021    | EPI_ISL_3769585 | 2021-08-30      |
| hCoV-19/Japan/IC-1786/2021    | EPI_ISL_3769586 | 2021-08-30      |
| hCoV-19/Japan/IC-1787/2021    | EPI_ISL_3769587 | 2021-08-30      |
| hCoV-19/Japan/IC-1788/2021    | EPI_ISL_3769588 | 2021-08-30      |
| hCoV-19/Japan/IC-1789/2021    | EPI_ISL_3769589 | 2021-08-30      |
| hCoV-19/Japan/IC-1790/2021    | EPI_ISL_3769590 | 2021-08-30      |
| hCoV-19/Japan/IC-1791/2021    | EPI_ISL_3769591 | 2021-08-30      |
| hCoV-19/Japan/IC-1792/2021    | EPI_ISL_3769592 | 2021-08-30      |
| hCoV-19/Japan/IC-1793/2021    | EPI_ISL_3769593 | 2021-08-30      |
| hCoV-19/Japan/IC-1794/2021    | EPI_ISL_3769594 | 2021-08-30      |
| hCoV-19/Japan/IC-1795/2021    | EPI_ISL_3769595 | 2021-08-30      |
| hCoV-19/Japan/IC-1796/2021    | EPI_ISL_3769596 | 2021-08-30      |
| hCoV-19/Japan/IC-1797/2021    | EPI_ISL_3769597 | 2021-08-30      |
| hCoV-19/Japan/IC-1798/2021    | EPI_ISL_3769598 | 2021-08-30      |
| hCoV-19/Japan/IC-1799/2021    | EPI_ISL_3769599 | 2021-08-30      |

| virus_name                     | epiID           | submission_date |
|--------------------------------|-----------------|-----------------|
| hCoV-19/Japan/IC-1800/2021     | EPI_ISL_3769600 | 2021-08-30      |
| hCoV-19/Japan/IC-1801/2021     | EPI_ISL_3769601 | 2021-08-30      |
| hCoV-19/Japan/IC-1802/2021     | EPI_ISL_3769602 | 2021-08-30      |
| hCoV-19/Japan/IC-1803/2021     | EPI_ISL_3769603 | 2021-08-30      |
| hCoV-19/Japan/IC-1804/2021     | EPI_ISL_3769604 | 2021-08-30      |
| hCoV-19/Japan/IC-1805/2021     | EPI_ISL_3769605 | 2021-08-30      |
| hCoV-19/Japan/IC-1806/2021     | EPI_ISL_3769606 | 2021-08-30      |
| hCoV-19/Japan/IC-1807/2021     | EPI_ISL_3769607 | 2021-08-30      |
| hCoV-19/Japan/IC-1808/2021     | EPI_ISL_3769608 | 2021-08-30      |
| hCoV-19/Japan/IC-1809/2021     | EPI_ISL_3769609 | 2021-08-30      |
| hCoV-19/Japan/IC-1810/2021     | EPI_ISL_3769610 | 2021-08-30      |
| hCoV-19/Japan/IC-1811/2021     | EPI_ISL_3769611 | 2021-08-30      |
| hCoV-19/Japan/IC-1812/2021     | EPI_ISL_3769612 | 2021-08-30      |
| hCoV-19/Japan/IC-1813/2021     | EPI_ISL_3769613 | 2021-08-30      |
| hCoV-19/Japan/IC-1814/2021     | EPI_ISL_3769614 | 2021-08-30      |
| hCoV-19/Japan/IC-1815/2021     | EPI_ISL_3769615 | 2021-08-30      |
| hCoV-19/Japan/IC-1816/2021     | EPI_ISL_3769616 | 2021-08-30      |
| hCoV-19/Japan/IC-1817/2021     | EPI_ISL_3769617 | 2021-08-30      |
| hCoV-19/Japan/IC-1818/2021     | EPI_ISL_3769618 | 2021-08-30      |
| hCoV-19/Japan/IC-1819/2021     | EPI_ISL_3769619 | 2021-08-30      |
| hCoV-19/Japan/IC-1820/2021     | EPI_ISL_3769620 | 2021-08-30      |
| hCoV-19/Japan/IC-1821/2021     | EPI_ISL_3769621 | 2021-08-30      |
| hCoV-19/Japan/IC-1822/2021     | EPI_ISL_3769622 | 2021-08-30      |
| hCoV-19/Japan/IC-1823/2021     | EPI_ISL_3769623 | 2021-08-30      |
| hCoV-19/Japan/IC-1824/2021     | EPI_ISL_3769624 | 2021-08-30      |
| hCoV-19/Japan/IC-1825/2021     | EPI_ISL_3769625 | 2021-08-30      |
| hCoV-19/Japan/IC-1826/2021     | EPI_ISL_3769626 | 2021-08-30      |
| hCoV-19/Japan/IC-1827/2021     | EPI_ISL_3769627 | 2021-08-30      |
| hCoV-19/Japan/IC-1828/2021     | EPI_ISL_3769628 | 2021-08-30      |
| hCoV-19/Japan/IC-1829/2021     | EPI_ISL_3769629 | 2021-08-30      |
| hCoV-19/Japan/IC-1830/2021     | EPI_ISL_3769630 | 2021-08-30      |
| hCoV-19/Japan/IC-1831/2021     | EPI_ISL_3769631 | 2021-08-30      |
| hCoV-19/Japan/IC-1832/2021     | EPI_ISL_3769632 | 2021-08-30      |
| hCoV-19/Japan/IC-1833/2021     | EPI_ISL_3769633 | 2021-08-30      |
| hCoV-19/Japan/IC-1834/2021     | EPI_ISL_3769634 | 2021-08-30      |
| hCoV-19/Japan/IC-1835/2021     | EPI_ISL_3769635 | 2021-08-30      |
| hCoV-19/Japan/IC-1836/2021     | EPI_ISL_3769636 | 2021-08-30      |
| hCoV-19/Japan/IC-1837/2021     | EPI_ISL_3769637 | 2021-08-30      |
| hCoV-19/Japan/IC-1838/2021     | EPI_ISL_3769638 | 2021-08-30      |
| hCoV-19/Japan/IC-1839/2021     | EPI_ISL_3769639 | 2021-08-30      |
| hCoV-19/Japan/OPHO-hb8-62/2021 | EPI_ISL_3772541 | 2021-08-30      |
| hCoV-19/Japan/OPHO-hb8-64/2021 | EPI_ISL_3773143 | 2021-08-30      |
| hCoV-19/Japan/OPHO-hb8-66/2021 | EPI_ISL_3773412 | 2021-08-30      |
| hCoV-19/Japan/OPHO-hb8-67/2021 | EPI_ISL_3773809 | 2021-08-30      |
| hCoV-19/Japan/OPHO-hb8-69/2021 | EPI_ISL_3774128 | 2021-08-30      |
| hCoV-19/Japan/OPHO-hb8-71/2021 | EPI_ISL_3774500 | 2021-08-30      |
| hCoV-19/Japan/OPHO-hb8-73/2021 | EPI_ISL_3774835 | 2021-08-30      |
| hCoV-19/Japan/OPHO-hb8-74/2021 | EPI_ISL_3775095 | 2021-08-30      |
| hCoV-19/Japan/OPHO-hb8-76/2021 | EPI_ISL_3775600 | 2021-08-30      |
| hCoV-19/Japan/OPHO-hb8-77/2021 | EPI_ISL_3775911 | 2021-08-30      |
| hCoV-19/Japan/OPHO-hb8-78/2021 | EPI_ISL_3776268 | 2021-08-30      |
| hCoV-19/Japan/OPHO-hb8-79/2021 | EPI_ISL_3776565 | 2021-08-30      |
| hCoV-19/Japan/OPHO-hb8-80/2021 | EPI_ISL_3776900 | 2021-08-30      |
| hCoV-19/Japan/OPHO-hb8-81/2021 | EPI_ISL_3777341 | 2021-08-30      |

| virus_name                     | epiID           | submission_date |
|--------------------------------|-----------------|-----------------|
| hCoV-19/Japan/OPHO-hb8-82/2021 | EPI_ISL_3777910 | 2021-08-30      |
| hCoV-19/Japan/OPHO-hb8-83/2021 | EPI_ISL_3778506 | 2021-08-30      |
| hCoV-19/Japan/OPHO-hb8-85/2021 | EPI_ISL_3778944 | 2021-08-30      |
| hCoV-19/Japan/RIMD00307/2021   | EPI_ISL_3799882 | 2021-08-30      |
| hCoV-19/Japan/RIMD00308/2021   | EPI_ISL_3799883 | 2021-08-30      |
| hCoV-19/Japan/RIMD00309/2021   | EPI_ISL_3799884 | 2021-08-30      |
| hCoV-19/Japan/RIMD00310/2021   | EPI_ISL_3799885 | 2021-08-30      |
| hCoV-19/Japan/RIMD00311/2021   | EPI_ISL_3799886 | 2021-08-30      |
| hCoV-19/Japan/RIMD00312/2021   | EPI_ISL_3799887 | 2021-08-30      |
| hCoV-19/Japan/RIMD00313/2021   | EPI_ISL_3799888 | 2021-08-30      |
| hCoV-19/Japan/RIMD00314/2021   | EPI_ISL_3799889 | 2021-08-30      |
| hCoV-19/Japan/RIMD00315/2021   | EPI_ISL_3799890 | 2021-08-30      |
| hCoV-19/Japan/RIMD00317/2021   | EPI_ISL_3799891 | 2021-08-30      |
| hCoV-19/Japan/RIMD00318/2021   | EPI_ISL_3799892 | 2021-08-30      |
| hCoV-19/Japan/RIMD00319/2021   | EPI_ISL_3799893 | 2021-08-30      |
| hCoV-19/Japan/RIMD00320/2021   | EPI_ISL_3799894 | 2021-08-30      |
| hCoV-19/Japan/RIMD00321/2021   | EPI_ISL_3799895 | 2021-08-30      |
| hCoV-19/Japan/RIMD00322/2021   | EPI_ISL_3799896 | 2021-08-30      |
| hCoV-19/Japan/RIMD00323/2021   | EPI_ISL_3799897 | 2021-08-30      |
| hCoV-19/Japan/RIMD00324/2021   | EPI_ISL_3799898 | 2021-08-30      |
| hCoV-19/Japan/RIMD00325/2021   | EPI_ISL_3799899 | 2021-08-30      |
| hCoV-19/Japan/RIMD00326/2021   | EPI_ISL_3799900 | 2021-08-30      |
| hCoV-19/Japan/RIMD00327/2021   | EPI_ISL_3799901 | 2021-08-30      |
| hCoV-19/Japan/RIMD00328/2021   | EPI_ISL_3799902 | 2021-08-30      |
| hCoV-19/Japan/RIMD00329/2021   | EPI_ISL_3799903 | 2021-08-30      |
| hCoV-19/Japan/RIMD00330/2021   | EPI_ISL_3799904 | 2021-08-30      |
| hCoV-19/Japan/RIMD00331/2021   | EPI_ISL_3799905 | 2021-08-30      |
| hCoV-19/Japan/RIMD00332/2021   | EPI_ISL_3799906 | 2021-08-30      |
| hCoV-19/Japan/RIMD00333/2021   | EPI_ISL_3799907 | 2021-08-30      |
| hCoV-19/Japan/RIMD00334/2021   | EPI_ISL_3799908 | 2021-08-30      |
| hCoV-19/Japan/RIMD00335/2021   | EPI_ISL_3799909 | 2021-08-30      |
| hCoV-19/Japan/RIMD00336/2021   | EPI_ISL_3799910 | 2021-08-30      |
| hCoV-19/Japan/RIMD00337/2021   | EPI_ISL_3799911 | 2021-08-30      |
| hCoV-19/Japan/RIMD00338/2021   | EPI_ISL_3799912 | 2021-08-30      |
| hCoV-19/Japan/RIMD00339/2021   | EPI_ISL_3799913 | 2021-08-30      |
| hCoV-19/Japan/RIMD00340/2021   | EPI_ISL_3799914 | 2021-08-30      |
| hCoV-19/Japan/RIMD00341/2021   | EPI_ISL_3799915 | 2021-08-30      |
| hCoV-19/Japan/RIMD00342/2021   | EPI_ISL_3799916 | 2021-08-30      |
| hCoV-19/Japan/RIMD00343/2021   | EPI_ISL_3799917 | 2021-08-30      |
| hCoV-19/Japan/RIMD00344/2021   | EPI_ISL_3799918 | 2021-08-30      |
| hCoV-19/Japan/RIMD00345/2021   | EPI_ISL_3799919 | 2021-08-30      |
| hCoV-19/Japan/RIMD00346/2021   | EPI_ISL_3799920 | 2021-08-30      |
| hCoV-19/Japan/RIMD00347/2021   | EPI_ISL_3799921 | 2021-08-30      |
| hCoV-19/Japan/RIMD00348/2021   | EPI_ISL_3799922 | 2021-08-30      |
| hCoV-19/Japan/RIMD00349/2021   | EPI_ISL_3799923 | 2021-08-30      |
| hCoV-19/Japan/RIMD00350/2021   | EPI_ISL_3799924 | 2021-08-30      |
| hCoV-19/Japan/RIMD00351/2021   | EPI_ISL_3799925 | 2021-08-30      |
| hCoV-19/Japan/RIMD00352/2021   | EPI_ISL_3799926 | 2021-08-30      |
| hCoV-19/Japan/RIMD00353/2021   | EPI_ISL_3799928 | 2021-08-30      |
| hCoV-19/Japan/RIMD00354/2021   | EPI_ISL_3799929 | 2021-08-30      |
| hCoV-19/Japan/RIMD00355/2021   | EPI_ISL_3799930 | 2021-08-30      |
| hCoV-19/Japan/RIMD00356/2021   | EPI_ISL_3799931 | 2021-08-30      |
| hCoV-19/Japan/RIMD00357/2021   | EPI_ISL_3799932 | 2021-08-30      |
| hCoV-19/Japan/RIMD00358/2021   | EPI_ISL_3799933 | 2021-08-30      |

| virus_name                   | epiID           | submission_date |
|------------------------------|-----------------|-----------------|
| hCoV-19/Japan/RIMD00359/2021 | EPI_ISL_3799934 | 2021-08-30      |
| hCoV-19/Japan/RIMD00360/2021 | EPI_ISL_3799935 | 2021-08-30      |
| hCoV-19/Japan/RIMD00361/2021 | EPI_ISL_3799936 | 2021-08-30      |
| hCoV-19/Japan/RIMD00362/2021 | EPI_ISL_3799937 | 2021-08-30      |
| hCoV-19/Japan/RIMD00363/2021 | EPI_ISL_3799938 | 2021-08-30      |
| hCoV-19/Japan/RIMD00364/2021 | EPI_ISL_3799939 | 2021-08-30      |
| hCoV-19/Japan/RIMD00365/2021 | EPI_ISL_3799940 | 2021-08-30      |
| hCoV-19/Japan/RIMD00366/2021 | EPI_ISL_3799941 | 2021-08-30      |
| hCoV-19/Japan/RIMD00367/2021 | EPI_ISL_3799942 | 2021-08-30      |
| hCoV-19/Japan/RIMD00368/2021 | EPI_ISL_3799943 | 2021-08-30      |
| hCoV-19/Japan/RIMD00369/2021 | EPI_ISL_3799944 | 2021-08-30      |
| hCoV-19/Japan/RIMD00370/2021 | EPI_ISL_3799945 | 2021-08-30      |
| hCoV-19/Japan/RIMD00371/2021 | EPI_ISL_3799946 | 2021-08-30      |
| hCoV-19/Japan/RIMD00372/2021 | EPI_ISL_3799947 | 2021-08-30      |
| hCoV-19/Japan/RIMD00373/2021 | EPI_ISL_3799948 | 2021-08-30      |
| hCoV-19/Japan/RIMD00374/2021 | EPI_ISL_3799949 | 2021-08-30      |
| hCoV-19/Japan/RIMD00375/2021 | EPI_ISL_3799950 | 2021-08-30      |
| hCoV-19/Japan/RIMD00376/2021 | EPI_ISL_3799951 | 2021-08-30      |
| hCoV-19/Japan/RIMD00377/2021 | EPI_ISL_3799952 | 2021-08-30      |
| hCoV-19/Japan/RIMD00378/2021 | EPI_ISL_3799953 | 2021-08-30      |
| hCoV-19/Japan/RIMD00379/2021 | EPI_ISL_3799954 | 2021-08-30      |
| hCoV-19/Japan/RIMD00380/2021 | EPI_ISL_3799955 | 2021-08-30      |
| hCoV-19/Japan/RIMD00381/2021 | EPI_ISL_3799956 | 2021-08-30      |
| hCoV-19/Japan/RIMD00382/2021 | EPI_ISL_3799957 | 2021-08-30      |
| hCoV-19/Japan/RIMD00383/2021 | EPI_ISL_3799958 | 2021-08-30      |
| hCoV-19/Japan/RIMD00384/2021 | EPI_ISL_3799959 | 2021-08-30      |
| hCoV-19/Japan/RIMD00385/2021 | EPI_ISL_3799960 | 2021-08-30      |
| hCoV-19/Japan/RIMD00386/2021 | EPI_ISL_3799961 | 2021-08-30      |
| hCoV-19/Japan/RIMD00387/2021 | EPI_ISL_3799962 | 2021-08-30      |
| hCoV-19/Japan/RIMD00388/2021 | EPI_ISL_3799963 | 2021-08-30      |
| hCoV-19/Japan/RIMD00389/2021 | EPI_ISL_3799964 | 2021-08-30      |
| hCoV-19/Japan/RIMD00390/2021 | EPI_ISL_3799965 | 2021-08-30      |
| hCoV-19/Japan/RIMD00391/2021 | EPI_ISL_3799966 | 2021-08-30      |
| hCoV-19/Japan/RIMD00392/2021 | EPI_ISL_3799967 | 2021-08-30      |
| hCoV-19/Japan/RIMD00393/2021 | EPI_ISL_3799968 | 2021-08-30      |
| hCoV-19/Japan/RIMD00394/2021 | EPI_ISL_3799969 | 2021-08-30      |
| hCoV-19/Japan/RIMD00395/2021 | EPI_ISL_3799970 | 2021-08-30      |
| hCoV-19/Japan/RIMD00396/2021 | EPI_ISL_3799971 | 2021-08-30      |
| hCoV-19/Japan/RIMD00397/2021 | EPI_ISL_3799972 | 2021-08-30      |
| hCoV-19/Japan/RIMD00398/2021 | EPI_ISL_3799973 | 2021-08-30      |
| hCoV-19/Japan/RIMD00399/2021 | EPI_ISL_3799974 | 2021-08-30      |
| hCoV-19/Japan/YCH0591/2021   | EPI_ISL_3827026 | 2021-08-31      |
| hCoV-19/Japan/YCH0592/2021   | EPI_ISL_3827046 | 2021-08-31      |
| hCoV-19/Japan/YCH0593/2021   | EPI_ISL_3827036 | 2021-08-31      |
| hCoV-19/Japan/YCH0594/2021   | EPI_ISL_3827045 | 2021-08-31      |
| hCoV-19/Japan/YCH0595/2021   | EPI_ISL_3827038 | 2021-08-31      |
| hCoV-19/Japan/YCH0596/2021   | EPI_ISL_3827025 | 2021-08-31      |
| hCoV-19/Japan/YCH0597/2021   | EPI_ISL_3827020 | 2021-08-31      |
| hCoV-19/Japan/YCH0598/2021   | EPI_ISL_3827035 | 2021-08-31      |
| hCoV-19/Japan/YCH0599/2021   | EPI_ISL_3827021 | 2021-08-31      |
| hCoV-19/Japan/YCH0600/2021   | EPI_ISL_3827022 | 2021-08-31      |
| hCoV-19/Japan/YCH0601/2021   | EPI_ISL_3827023 | 2021-08-31      |
| hCoV-19/Japan/YCH0602/2021   | EPI_ISL_3827043 | 2021-08-31      |
| hCoV-19/Japan/YCH0603/2021   | EPI_ISL_3827044 | 2021-08-31      |

| virus_name                        | epiID           | submission_date |
|-----------------------------------|-----------------|-----------------|
| hCoV-19/Japan/YCH0604/2021        | EPI_ISL_3827024 | 2021-08-31      |
| hCoV-19/Japan/YCH0605/2021        | EPI_ISL_3827033 | 2021-08-31      |
| hCoV-19/Japan/YCH0606/2021        | EPI_ISL_3827042 | 2021-08-31      |
| hCoV-19/Japan/YCH0607/2021        | EPI_ISL_3827034 | 2021-08-31      |
| hCoV-19/Japan/YCH0608/2021        | EPI_ISL_3827028 | 2021-08-31      |
| hCoV-19/Japan/YCH0609/2021        | EPI_ISL_3827029 | 2021-08-31      |
| hCoV-19/Japan/YCH0610/2021        | EPI_ISL_3827037 | 2021-08-31      |
| hCoV-19/Japan/YCH0611/2021        | EPI_ISL_3827030 | 2021-08-31      |
| hCoV-19/Japan/YCH0612/2021        | EPI_ISL_3827031 | 2021-08-31      |
| hCoV-19/Japan/YCH0613/2021        | EPI_ISL_3827041 | 2021-08-31      |
| hCoV-19/Japan/YCH0614/2021        | EPI_ISL_3827019 | 2021-08-31      |
| hCoV-19/Japan/YCH0615/2021        | EPI_ISL_3827032 | 2021-08-31      |
| hCoV-19/Japan/YCH0616/2021        | EPI_ISL_3827013 | 2021-08-31      |
| hCoV-19/Japan/YCH0617/2021        | EPI_ISL_3827014 | 2021-08-31      |
| hCoV-19/Japan/YCH0618/2021        | EPI_ISL_3827027 | 2021-08-31      |
| hCoV-19/Japan/YCH0619/2021        | EPI_ISL_3827015 | 2021-08-31      |
| hCoV-19/Japan/YCH0620/2021        | EPI_ISL_3827016 | 2021-08-31      |
| hCoV-19/Japan/YCH0621/2021        | EPI_ISL_3827017 | 2021-08-31      |
| hCoV-19/Japan/YCH0622/2021        | EPI_ISL_3827018 | 2021-08-31      |
| hCoV-19/Japan/YCH0623/2021        | EPI_ISL_3827039 | 2021-08-31      |
| hCoV-19/Japan/YCH0624/2021        | EPI_ISL_3827040 | 2021-08-31      |
| hCoV-19/Japan/TY28-233-P0/2021    | EPI_ISL_3869203 | 2021-09-01      |
| hCoV-19/Japan/TY28-236-P0/2021    | EPI_ISL_3869204 | 2021-09-01      |
| hCoV-19/Japan/TY28-248-P0/2021    | EPI_ISL_3869205 | 2021-09-01      |
| hCoV-19/Japan/TY28-257-P0/2021    | EPI_ISL_3869206 | 2021-09-01      |
| hCoV-19/Japan/TY28-440-P0/2021    | EPI_ISL_3869207 | 2021-09-01      |
| hCoV-19/Japan/TY28-444-P0/2021    | EPI_ISL_3869208 | 2021-09-01      |
| hCoV-19/Japan/TY28-453-P0/2021    | EPI_ISL_3869209 | 2021-09-01      |
| hCoV-19/Japan/TY28-454-P0/2021    | EPI_ISL_3869210 | 2021-09-01      |
| hCoV-19/Japan/TY28-456-P0/2021    | EPI_ISL_3869211 | 2021-09-01      |
| hCoV-19/Japan/TY28-463-P0/2021    | EPI_ISL_3869212 | 2021-09-01      |
| hCoV-19/Japan/TY28-484-P0/2021    | EPI_ISL_3869213 | 2021-09-01      |
| hCoV-19/Japan/TY28-486-P0/2021    | EPI_ISL_3869214 | 2021-09-01      |
| hCoV-19/Japan/YCH0625/2021        | EPI_ISL_3857532 | 2021-09-01      |
| hCoV-19/Japan/YCH0626/2021        | EPI_ISL_3857536 | 2021-09-01      |
| hCoV-19/Japan/YCH0627/2021        | EPI_ISL_3857540 | 2021-09-01      |
| hCoV-19/Japan/YCH0628/2021        | EPI_ISL_3857544 | 2021-09-01      |
| hCoV-19/Japan/YCH0629/2021        | EPI_ISL_3857546 | 2021-09-01      |
| hCoV-19/Japan/YCH0630/2021        | EPI_ISL_3857548 | 2021-09-01      |
| hCoV-19/Japan/YCH0631/2021        | EPI_ISL_3857550 | 2021-09-01      |
| hCoV-19/Japan/YCH0632/2021        | EPI_ISL_3857554 | 2021-09-01      |
| hCoV-19/Japan/YCH0633/2021        | EPI_ISL_3857559 | 2021-09-01      |
| hCoV-19/Japan/YCH0634/2021        | EPI_ISL_3857563 | 2021-09-01      |
| hCoV-19/Japan/YCH0635/2021        | EPI_ISL_3857568 | 2021-09-01      |
| hCoV-19/Japan/YCH0636/2021        | EPI_ISL_3857572 | 2021-09-01      |
| hCoV-19/Japan/YCH0637/2021        | EPI_ISL_3857576 | 2021-09-01      |
| hCoV-19/Japan/YCH0638/2021        | EPI_ISL_3857578 | 2021-09-01      |
| hCoV-19/Japan/20210708-29742/2021 | EPI_ISL_3908507 | 2021-09-02      |
| hCoV-19/Japan/20210712-30066/2021 | EPI_ISL_3908504 | 2021-09-02      |
| hCoV-19/Japan/20210713-30234/2021 | EPI_ISL_3908499 | 2021-09-02      |
| hCoV-19/Japan/20210715-30464/2021 | EPI_ISL_3908500 | 2021-09-02      |
| hCoV-19/Japan/20210716-30558/2021 | EPI_ISL_3908498 | 2021-09-02      |
| hCoV-19/Japan/20210719-30697/2021 | EPI_ISL_3908509 | 2021-09-02      |
| hCoV-19/Japan/20210722-31112/2021 | EPI_ISL_3908512 | 2021-09-02      |

| virus_name                        | epiID           | submission_date |
|-----------------------------------|-----------------|-----------------|
| hCoV-19/Japan/20210724-31258/2021 | EPI_ISL_3908502 | 2021-09-02      |
| hCoV-19/Japan/20210725-31263/2021 | EPI_ISL_3908510 | 2021-09-02      |
| hCoV-19/Japan/20210726-31399/2021 | EPI_ISL_3908503 | 2021-09-02      |
| hCoV-19/Japan/20210726-31400/2021 | EPI_ISL_3908501 | 2021-09-02      |
| hCoV-19/Japan/20210729-31764/2021 | EPI_ISL_3908508 | 2021-09-02      |
| hCoV-19/Japan/20210730-31868/2021 | EPI_ISL_3908506 | 2021-09-02      |
| hCoV-19/Japan/20210731-31928/2021 | EPI_ISL_3908505 | 2021-09-02      |
| hCoV-19/Japan/20210731-32008/2021 | EPI_ISL_3908511 | 2021-09-02      |
| hCoV-19/Japan/PG-64120/2021       | EPI_ISL_3876259 | 2021-09-02      |
| hCoV-19/Japan/PG-64125/2021       | EPI_ISL_3876260 | 2021-09-02      |
| hCoV-19/Japan/PG-64164/2021       | EPI_ISL_3876261 | 2021-09-02      |
| hCoV-19/Japan/PG-64176/2021       | EPI_ISL_3876262 | 2021-09-02      |
| hCoV-19/Japan/PG-64215/2021       | EPI_ISL_3876263 | 2021-09-02      |
| hCoV-19/Japan/PG-65056/2021       | EPI_ISL_3871139 | 2021-09-02      |
| hCoV-19/Japan/PG-65058/2021       | EPI_ISL_3871140 | 2021-09-02      |
| hCoV-19/Japan/PG-66342/2021       | EPI_ISL_3875955 | 2021-09-02      |
| hCoV-19/Japan/PG-66343/2021       | EPI_ISL_3875956 | 2021-09-02      |
| hCoV-19/Japan/PG-66344/2021       | EPI_ISL_3875957 | 2021-09-02      |
| hCoV-19/Japan/PG-66345/2021       | EPI_ISL_3875958 | 2021-09-02      |
| hCoV-19/Japan/PG-66375/2021       | EPI_ISL_3872360 | 2021-09-02      |
| hCoV-19/Japan/PG-66382/2021       | EPI_ISL_3872361 | 2021-09-02      |
| hCoV-19/Japan/PG-66389/2021       | EPI_ISL_3871006 | 2021-09-02      |
| hCoV-19/Japan/PG-66390/2021       | EPI_ISL_3871007 | 2021-09-02      |
| hCoV-19/Japan/PG-66391/2021       | EPI_ISL_3872116 | 2021-09-02      |
| hCoV-19/Japan/PG-66404/2021       | EPI_ISL_3874133 | 2021-09-02      |
| hCoV-19/Japan/PG-66420/2021       | EPI_ISL_3876264 | 2021-09-02      |
| hCoV-19/Japan/PG-66460/2021       | EPI_ISL_3876265 | 2021-09-02      |
| hCoV-19/Japan/PG-66461/2021       | EPI_ISL_3876266 | 2021-09-02      |
| hCoV-19/Japan/PG-66462/2021       | EPI_ISL_3876267 | 2021-09-02      |
| hCoV-19/Japan/PG-66463/2021       | EPI_ISL_3876268 | 2021-09-02      |
| hCoV-19/Japan/PG-66464/2021       | EPI_ISL_3876269 | 2021-09-02      |
| hCoV-19/Japan/PG-66465/2021       | EPI_ISL_3876270 | 2021-09-02      |
| hCoV-19/Japan/PG-66473/2021       | EPI_ISL_3876271 | 2021-09-02      |
| hCoV-19/Japan/PG-66511/2021       | EPI_ISL_3876272 | 2021-09-02      |
| hCoV-19/Japan/PG-66519/2021       | EPI_ISL_3876273 | 2021-09-02      |
| hCoV-19/Japan/PG-66520/2021       | EPI_ISL_3876274 | 2021-09-02      |
| hCoV-19/Japan/PG-66616/2021       | EPI_ISL_3876275 | 2021-09-02      |
| hCoV-19/Japan/PG-66844/2021       | EPI_ISL_3874708 | 2021-09-02      |
| hCoV-19/Japan/PG-66845/2021       | EPI_ISL_3874710 | 2021-09-02      |
| hCoV-19/Japan/PG-66846/2021       | EPI_ISL_3874711 | 2021-09-02      |
| hCoV-19/Japan/PG-66847/2021       | EPI_ISL_3874712 | 2021-09-02      |
| hCoV-19/Japan/PG-66904/2021       | EPI_ISL_3871141 | 2021-09-02      |
| hCoV-19/Japan/PG-66905/2021       | EPI_ISL_3871142 | 2021-09-02      |
| hCoV-19/Japan/PG-66906/2021       | EPI_ISL_3871143 | 2021-09-02      |
| hCoV-19/Japan/PG-66907/2021       | EPI_ISL_3871144 | 2021-09-02      |
| hCoV-19/Japan/PG-66908/2021       | EPI_ISL_3871145 | 2021-09-02      |
| hCoV-19/Japan/PG-66921/2021       | EPI_ISL_3871146 | 2021-09-02      |
| hCoV-19/Japan/PG-66925/2021       | EPI_ISL_3871147 | 2021-09-02      |
| hCoV-19/Japan/PG-66926/2021       | EPI_ISL_3871148 | 2021-09-02      |
| hCoV-19/Japan/PG-66950/2021       | EPI_ISL_3872231 | 2021-09-02      |
| hCoV-19/Japan/PG-66988/2021       | EPI_ISL_3876276 | 2021-09-02      |
| hCoV-19/Japan/PG-67100/2021       | EPI_ISL_3876277 | 2021-09-02      |
| hCoV-19/Japan/PG-67246/2021       | EPI_ISL_3876278 | 2021-09-02      |
| hCoV-19/Japan/PG-67302/2021       | EPI_ISL_3876279 | 2021-09-02      |

| virus_name                  | epiID           | submission_date |
|-----------------------------|-----------------|-----------------|
| hCoV-19/Japan/PG-67309/2021 | EPI_ISL_3876280 | 2021-09-02      |
| hCoV-19/Japan/PG-67313/2021 | EPI_ISL_3876281 | 2021-09-02      |
| hCoV-19/Japan/PG-67319/2021 | EPI_ISL_3876282 | 2021-09-02      |
| hCoV-19/Japan/PG-67702/2021 | EPI_ISL_3875959 | 2021-09-02      |
| hCoV-19/Japan/PG-67703/2021 | EPI_ISL_3875960 | 2021-09-02      |
| hCoV-19/Japan/PG-67704/2021 | EPI_ISL_3875961 | 2021-09-02      |
| hCoV-19/Japan/PG-67705/2021 | EPI_ISL_3875962 | 2021-09-02      |
| hCoV-19/Japan/PG-67706/2021 | EPI_ISL_3875963 | 2021-09-02      |
| hCoV-19/Japan/PG-67748/2021 | EPI_ISL_3875713 | 2021-09-02      |
| hCoV-19/Japan/PG-67749/2021 | EPI_ISL_3875716 | 2021-09-02      |
| hCoV-19/Japan/PG-67750/2021 | EPI_ISL_3875719 | 2021-09-02      |
| hCoV-19/Japan/PG-67751/2021 | EPI_ISL_3872519 | 2021-09-02      |
| hCoV-19/Japan/PG-67752/2021 | EPI_ISL_3872520 | 2021-09-02      |
| hCoV-19/Japan/PG-67753/2021 | EPI_ISL_3872521 | 2021-09-02      |
| hCoV-19/Japan/PG-67754/2021 | EPI_ISL_3872522 | 2021-09-02      |
| hCoV-19/Japan/PG-67755/2021 | EPI_ISL_3872523 | 2021-09-02      |
| hCoV-19/Japan/PG-67756/2021 | EPI_ISL_3872524 | 2021-09-02      |
| hCoV-19/Japan/PG-67757/2021 | EPI_ISL_3872525 | 2021-09-02      |
| hCoV-19/Japan/PG-67758/2021 | EPI_ISL_3872526 | 2021-09-02      |
| hCoV-19/Japan/PG-67759/2021 | EPI_ISL_3872527 | 2021-09-02      |
| hCoV-19/Japan/PG-67760/2021 | EPI_ISL_3872528 | 2021-09-02      |
| hCoV-19/Japan/PG-67761/2021 | EPI_ISL_3872529 | 2021-09-02      |
| hCoV-19/Japan/PG-67762/2021 | EPI_ISL_3872530 | 2021-09-02      |
| hCoV-19/Japan/PG-67763/2021 | EPI_ISL_3872531 | 2021-09-02      |
| hCoV-19/Japan/PG-67764/2021 | EPI_ISL_3872532 | 2021-09-02      |
| hCoV-19/Japan/PG-67777/2021 | EPI_ISL_3872533 | 2021-09-02      |
| hCoV-19/Japan/PG-67780/2021 | EPI_ISL_3872534 | 2021-09-02      |
| hCoV-19/Japan/PG-67781/2021 | EPI_ISL_3872535 | 2021-09-02      |
| hCoV-19/Japan/PG-67782/2021 | EPI_ISL_3872511 | 2021-09-02      |
| hCoV-19/Japan/PG-67783/2021 | EPI_ISL_3872512 | 2021-09-02      |
| hCoV-19/Japan/PG-67784/2021 | EPI_ISL_3872513 | 2021-09-02      |
| hCoV-19/Japan/PG-67785/2021 | EPI_ISL_3872514 | 2021-09-02      |
| hCoV-19/Japan/PG-67790/2021 | EPI_ISL_3872117 | 2021-09-02      |
| hCoV-19/Japan/PG-67791/2021 | EPI_ISL_3872118 | 2021-09-02      |
| hCoV-19/Japan/PG-67792/2021 | EPI_ISL_3872119 | 2021-09-02      |
| hCoV-19/Japan/PG-67793/2021 | EPI_ISL_3872120 | 2021-09-02      |
| hCoV-19/Japan/PG-67805/2021 | EPI_ISL_3872121 | 2021-09-02      |
| hCoV-19/Japan/PG-67806/2021 | EPI_ISL_3872122 | 2021-09-02      |
| hCoV-19/Japan/PG-67807/2021 | EPI_ISL_3872123 | 2021-09-02      |
| hCoV-19/Japan/PG-67808/2021 | EPI_ISL_3872124 | 2021-09-02      |
| hCoV-19/Japan/PG-67837/2021 | EPI_ISL_3876283 | 2021-09-02      |
| hCoV-19/Japan/PG-67895/2021 | EPI_ISL_3876284 | 2021-09-02      |
| hCoV-19/Japan/PG-68301/2021 | EPI_ISL_3875964 | 2021-09-02      |
| hCoV-19/Japan/PG-68302/2021 | EPI_ISL_3875965 | 2021-09-02      |
| hCoV-19/Japan/PG-68303/2021 | EPI_ISL_3875966 | 2021-09-02      |
| hCoV-19/Japan/PG-68304/2021 | EPI_ISL_3875967 | 2021-09-02      |
| hCoV-19/Japan/PG-68305/2021 | EPI_ISL_3875968 | 2021-09-02      |
| hCoV-19/Japan/PG-68306/2021 | EPI_ISL_3875969 | 2021-09-02      |
| hCoV-19/Japan/PG-68307/2021 | EPI_ISL_3875970 | 2021-09-02      |
| hCoV-19/Japan/PG-68308/2021 | EPI_ISL_3875971 | 2021-09-02      |
| hCoV-19/Japan/PG-68309/2021 | EPI_ISL_3875972 | 2021-09-02      |
| hCoV-19/Japan/PG-68310/2021 | EPI_ISL_3875973 | 2021-09-02      |
| hCoV-19/Japan/PG-68311/2021 | EPI_ISL_3875974 | 2021-09-02      |
| hCoV-19/Japan/PG-68312/2021 | EPI_ISL_3875975 | 2021-09-02      |



| virus_name                  | epiID           | submission_date |
|-----------------------------|-----------------|-----------------|
| hCoV-19/Japan/PG-68313/2021 | EPI_ISL_3875976 | 2021-09-02      |
| hCoV-19/Japan/PG-68314/2021 | EPI_ISL_3875977 | 2021-09-02      |
| hCoV-19/Japan/PG-68315/2021 | EPI_ISL_3875978 | 2021-09-02      |
| hCoV-19/Japan/PG-68316/2021 | EPI_ISL_3875979 | 2021-09-02      |
| hCoV-19/Japan/PG-68317/2021 | EPI_ISL_3875980 | 2021-09-02      |
| hCoV-19/Japan/PG-68318/2021 | EPI_ISL_3875981 | 2021-09-02      |
| hCoV-19/Japan/PG-68346/2021 | EPI_ISL_3873293 | 2021-09-02      |
| hCoV-19/Japan/PG-68349/2021 | EPI_ISL_3873294 | 2021-09-02      |
| hCoV-19/Japan/PG-68356/2021 | EPI_ISL_3871464 | 2021-09-02      |
| hCoV-19/Japan/PG-68357/2021 | EPI_ISL_3871465 | 2021-09-02      |
| hCoV-19/Japan/PG-68358/2021 | EPI_ISL_3871466 | 2021-09-02      |
| hCoV-19/Japan/PG-68359/2021 | EPI_ISL_3871467 | 2021-09-02      |
| hCoV-19/Japan/PG-68360/2021 | EPI_ISL_3871468 | 2021-09-02      |
| hCoV-19/Japan/PG-68365/2021 | EPI_ISL_3871149 | 2021-09-02      |
| hCoV-19/Japan/PG-68366/2021 | EPI_ISL_3871150 | 2021-09-02      |
| hCoV-19/Japan/PG-68367/2021 | EPI_ISL_3871151 | 2021-09-02      |
| hCoV-19/Japan/PG-68368/2021 | EPI_ISL_3871152 | 2021-09-02      |
| hCoV-19/Japan/PG-68369/2021 | EPI_ISL_3871153 | 2021-09-02      |
| hCoV-19/Japan/PG-68370/2021 | EPI_ISL_3871154 | 2021-09-02      |
| hCoV-19/Japan/PG-68371/2021 | EPI_ISL_3871155 | 2021-09-02      |
| hCoV-19/Japan/PG-68372/2021 | EPI_ISL_3871156 | 2021-09-02      |
| hCoV-19/Japan/PG-68373/2021 | EPI_ISL_3871157 | 2021-09-02      |
| hCoV-19/Japan/PG-68374/2021 | EPI_ISL_3871158 | 2021-09-02      |
| hCoV-19/Japan/PG-68375/2021 | EPI_ISL_3871159 | 2021-09-02      |
| hCoV-19/Japan/PG-68376/2021 | EPI_ISL_3871160 | 2021-09-02      |
| hCoV-19/Japan/PG-68377/2021 | EPI_ISL_3871161 | 2021-09-02      |
| hCoV-19/Japan/PG-68378/2021 | EPI_ISL_3871162 | 2021-09-02      |
| hCoV-19/Japan/PG-68379/2021 | EPI_ISL_3871163 | 2021-09-02      |
| hCoV-19/Japan/PG-68390/2021 | EPI_ISL_3873329 | 2021-09-02      |
| hCoV-19/Japan/PG-68391/2021 | EPI_ISL_3873330 | 2021-09-02      |
| hCoV-19/Japan/PG-68392/2021 | EPI_ISL_3873331 | 2021-09-02      |
| hCoV-19/Japan/PG-68393/2021 | EPI_ISL_3873332 | 2021-09-02      |
| hCoV-19/Japan/PG-68394/2021 | EPI_ISL_3873333 | 2021-09-02      |
| hCoV-19/Japan/PG-68396/2021 | EPI_ISL_3873334 | 2021-09-02      |
| hCoV-19/Japan/PG-68397/2021 | EPI_ISL_3873335 | 2021-09-02      |
| hCoV-19/Japan/PG-68398/2021 | EPI_ISL_3873336 | 2021-09-02      |
| hCoV-19/Japan/PG-68399/2021 | EPI_ISL_3873337 | 2021-09-02      |
| hCoV-19/Japan/PG-68401/2021 | EPI_ISL_3874519 | 2021-09-02      |
| hCoV-19/Japan/PG-68402/2021 | EPI_ISL_3874520 | 2021-09-02      |
| hCoV-19/Japan/PG-68403/2021 | EPI_ISL_3874521 | 2021-09-02      |
| hCoV-19/Japan/PG-68404/2021 | EPI_ISL_3874522 | 2021-09-02      |
| hCoV-19/Japan/PG-68405/2021 | EPI_ISL_3874523 | 2021-09-02      |
| hCoV-19/Japan/PG-68406/2021 | EPI_ISL_3874524 | 2021-09-02      |
| hCoV-19/Japan/PG-68407/2021 | EPI_ISL_3874525 | 2021-09-02      |
| hCoV-19/Japan/PG-68408/2021 | EPI_ISL_3874526 | 2021-09-02      |
| hCoV-19/Japan/PG-68409/2021 | EPI_ISL_3874527 | 2021-09-02      |
| hCoV-19/Japan/PG-68411/2021 | EPI_ISL_3870954 | 2021-09-02      |
| hCoV-19/Japan/PG-68412/2021 | EPI_ISL_3870955 | 2021-09-02      |
| hCoV-19/Japan/PG-68413/2021 | EPI_ISL_3870956 | 2021-09-02      |
| hCoV-19/Japan/PG-68414/2021 | EPI_ISL_3870957 | 2021-09-02      |
| hCoV-19/Japan/PG-68415/2021 | EPI_ISL_3872232 | 2021-09-02      |
| hCoV-19/Japan/PG-68416/2021 | EPI_ISL_3872233 | 2021-09-02      |
| hCoV-19/Japan/PG-68417/2021 | EPI_ISL_3872234 | 2021-09-02      |
| hCoV-19/Japan/PG-68418/2021 | EPI_ISL_3872235 | 2021-09-02      |

| virus_name                  | epiID           | submission_date |
|-----------------------------|-----------------|-----------------|
| hCoV-19/Japan/PG-68419/2021 | EPI_ISL_3872236 | 2021-09-02      |
| hCoV-19/Japan/PG-68420/2021 | EPI_ISL_3872237 | 2021-09-02      |
| hCoV-19/Japan/PG-68422/2021 | EPI_ISL_3873525 | 2021-09-02      |
| hCoV-19/Japan/PG-68423/2021 | EPI_ISL_3873526 | 2021-09-02      |
| hCoV-19/Japan/PG-68433/2021 | EPI_ISL_3873527 | 2021-09-02      |
| hCoV-19/Japan/PG-68434/2021 | EPI_ISL_3873528 | 2021-09-02      |
| hCoV-19/Japan/PG-68437/2021 | EPI_ISL_3873529 | 2021-09-02      |
| hCoV-19/Japan/PG-68454/2021 | EPI_ISL_3873530 | 2021-09-02      |
| hCoV-19/Japan/PG-68455/2021 | EPI_ISL_3873531 | 2021-09-02      |
| hCoV-19/Japan/PG-68460/2021 | EPI_ISL_3873532 | 2021-09-02      |
| hCoV-19/Japan/PG-68462/2021 | EPI_ISL_3873533 | 2021-09-02      |
| hCoV-19/Japan/PG-68464/2021 | EPI_ISL_3873534 | 2021-09-02      |
| hCoV-19/Japan/PG-68547/2021 | EPI_ISL_3874257 | 2021-09-02      |
| hCoV-19/Japan/PG-68548/2021 | EPI_ISL_3874258 | 2021-09-02      |
| hCoV-19/Japan/PG-68549/2021 | EPI_ISL_3874259 | 2021-09-02      |
| hCoV-19/Japan/PG-68550/2021 | EPI_ISL_3874260 | 2021-09-02      |
| hCoV-19/Japan/PG-68551/2021 | EPI_ISL_3874261 | 2021-09-02      |
| hCoV-19/Japan/PG-68552/2021 | EPI_ISL_3874262 | 2021-09-02      |
| hCoV-19/Japan/PG-68554/2021 | EPI_ISL_3874263 | 2021-09-02      |
| hCoV-19/Japan/PG-68575/2021 | EPI_ISL_3876285 | 2021-09-02      |
| hCoV-19/Japan/PG-68576/2021 | EPI_ISL_3876286 | 2021-09-02      |
| hCoV-19/Japan/PG-68577/2021 | EPI_ISL_3876287 | 2021-09-02      |
| hCoV-19/Japan/PG-68624/2021 | EPI_ISL_3876288 | 2021-09-02      |
| hCoV-19/Japan/PG-68661/2021 | EPI_ISL_3876289 | 2021-09-02      |
| hCoV-19/Japan/PG-68662/2021 | EPI_ISL_3876290 | 2021-09-02      |
| hCoV-19/Japan/PG-68663/2021 | EPI_ISL_3876291 | 2021-09-02      |
| hCoV-19/Japan/PG-68664/2021 | EPI_ISL_3876292 | 2021-09-02      |
| hCoV-19/Japan/PG-68665/2021 | EPI_ISL_3876293 | 2021-09-02      |
| hCoV-19/Japan/PG-68666/2021 | EPI_ISL_3876294 | 2021-09-02      |
| hCoV-19/Japan/PG-68669/2021 | EPI_ISL_3876295 | 2021-09-02      |
| hCoV-19/Japan/PG-68670/2021 | EPI_ISL_3876296 | 2021-09-02      |
| hCoV-19/Japan/PG-68671/2021 | EPI_ISL_3876297 | 2021-09-02      |
| hCoV-19/Japan/PG-68673/2021 | EPI_ISL_3876298 | 2021-09-02      |
| hCoV-19/Japan/PG-68714/2021 | EPI_ISL_3876299 | 2021-09-02      |
| hCoV-19/Japan/PG-68715/2021 | EPI_ISL_3876300 | 2021-09-02      |
| hCoV-19/Japan/PG-68716/2021 | EPI_ISL_3876301 | 2021-09-02      |
| hCoV-19/Japan/PG-68717/2021 | EPI_ISL_3876302 | 2021-09-02      |
| hCoV-19/Japan/PG-68738/2021 | EPI_ISL_3876303 | 2021-09-02      |
| hCoV-19/Japan/PG-68739/2021 | EPI_ISL_3876304 | 2021-09-02      |
| hCoV-19/Japan/PG-68740/2021 | EPI_ISL_3876305 | 2021-09-02      |
| hCoV-19/Japan/PG-68741/2021 | EPI_ISL_3876306 | 2021-09-02      |
| hCoV-19/Japan/PG-68742/2021 | EPI_ISL_3876307 | 2021-09-02      |
| hCoV-19/Japan/PG-68743/2021 | EPI_ISL_3876308 | 2021-09-02      |
| hCoV-19/Japan/PG-68744/2021 | EPI_ISL_3876309 | 2021-09-02      |
| hCoV-19/Japan/PG-68745/2021 | EPI_ISL_3876310 | 2021-09-02      |
| hCoV-19/Japan/PG-68746/2021 | EPI_ISL_3876311 | 2021-09-02      |
| hCoV-19/Japan/PG-68747/2021 | EPI_ISL_3876312 | 2021-09-02      |
| hCoV-19/Japan/PG-68748/2021 | EPI_ISL_3876313 | 2021-09-02      |
| hCoV-19/Japan/PG-68749/2021 | EPI_ISL_3876314 | 2021-09-02      |
| hCoV-19/Japan/PG-68750/2021 | EPI_ISL_3876315 | 2021-09-02      |
| hCoV-19/Japan/PG-68751/2021 | EPI_ISL_3876316 | 2021-09-02      |
| hCoV-19/Japan/PG-68752/2021 | EPI_ISL_3876317 | 2021-09-02      |
| hCoV-19/Japan/PG-68753/2021 | EPI_ISL_3876318 | 2021-09-02      |
| hCoV-19/Japan/PG-68754/2021 | EPI_ISL_3876319 | 2021-09-02      |

| virus_name                  | epiID           | submission_date |
|-----------------------------|-----------------|-----------------|
| hCoV-19/Japan/PG-68755/2021 | EPI_ISL_3876320 | 2021-09-02      |
| hCoV-19/Japan/PG-68756/2021 | EPI_ISL_3876321 | 2021-09-02      |
| hCoV-19/Japan/PG-68757/2021 | EPI_ISL_3876322 | 2021-09-02      |
| hCoV-19/Japan/PG-68758/2021 | EPI_ISL_3876323 | 2021-09-02      |
| hCoV-19/Japan/PG-68759/2021 | EPI_ISL_3876324 | 2021-09-02      |
| hCoV-19/Japan/PG-68760/2021 | EPI_ISL_3876325 | 2021-09-02      |
| hCoV-19/Japan/PG-68761/2021 | EPI_ISL_3876326 | 2021-09-02      |
| hCoV-19/Japan/PG-68762/2021 | EPI_ISL_3876327 | 2021-09-02      |
| hCoV-19/Japan/PG-68763/2021 | EPI_ISL_3876328 | 2021-09-02      |
| hCoV-19/Japan/PG-68764/2021 | EPI_ISL_3876329 | 2021-09-02      |
| hCoV-19/Japan/PG-68765/2021 | EPI_ISL_3876330 | 2021-09-02      |
| hCoV-19/Japan/PG-68766/2021 | EPI_ISL_3876331 | 2021-09-02      |
| hCoV-19/Japan/PG-68767/2021 | EPI_ISL_3876332 | 2021-09-02      |
| hCoV-19/Japan/PG-68768/2021 | EPI_ISL_3876333 | 2021-09-02      |
| hCoV-19/Japan/PG-68769/2021 | EPI_ISL_3876334 | 2021-09-02      |
| hCoV-19/Japan/PG-68770/2021 | EPI_ISL_3876335 | 2021-09-02      |
| hCoV-19/Japan/PG-68771/2021 | EPI_ISL_3876336 | 2021-09-02      |
| hCoV-19/Japan/PG-68772/2021 | EPI_ISL_3876337 | 2021-09-02      |
| hCoV-19/Japan/PG-68773/2021 | EPI_ISL_3876338 | 2021-09-02      |
| hCoV-19/Japan/PG-68774/2021 | EPI_ISL_3876339 | 2021-09-02      |
| hCoV-19/Japan/PG-68775/2021 | EPI_ISL_3876340 | 2021-09-02      |
| hCoV-19/Japan/PG-68776/2021 | EPI_ISL_3876341 | 2021-09-02      |
| hCoV-19/Japan/PG-68777/2021 | EPI_ISL_3876342 | 2021-09-02      |
| hCoV-19/Japan/PG-68778/2021 | EPI_ISL_3876343 | 2021-09-02      |
| hCoV-19/Japan/PG-68779/2021 | EPI_ISL_3876344 | 2021-09-02      |
| hCoV-19/Japan/PG-68780/2021 | EPI_ISL_3876345 | 2021-09-02      |
| hCoV-19/Japan/PG-68781/2021 | EPI_ISL_3876346 | 2021-09-02      |
| hCoV-19/Japan/PG-68782/2021 | EPI_ISL_3876347 | 2021-09-02      |
| hCoV-19/Japan/PG-68784/2021 | EPI_ISL_3876348 | 2021-09-02      |
| hCoV-19/Japan/PG-68811/2021 | EPI_ISL_3876349 | 2021-09-02      |
| hCoV-19/Japan/PG-68820/2021 | EPI_ISL_3876350 | 2021-09-02      |
| hCoV-19/Japan/PG-68821/2021 | EPI_ISL_3876351 | 2021-09-02      |
| hCoV-19/Japan/PG-68822/2021 | EPI_ISL_3876352 | 2021-09-02      |
| hCoV-19/Japan/PG-68838/2021 | EPI_ISL_3876353 | 2021-09-02      |
| hCoV-19/Japan/PG-68839/2021 | EPI_ISL_3876354 | 2021-09-02      |
| hCoV-19/Japan/PG-68840/2021 | EPI_ISL_3876355 | 2021-09-02      |
| hCoV-19/Japan/PG-68841/2021 | EPI_ISL_3876356 | 2021-09-02      |
| hCoV-19/Japan/PG-68842/2021 | EPI_ISL_3876357 | 2021-09-02      |
| hCoV-19/Japan/PG-68899/2021 | EPI_ISL_3876358 | 2021-09-02      |
| hCoV-19/Japan/PG-68905/2021 | EPI_ISL_3876359 | 2021-09-02      |
| hCoV-19/Japan/PG-68912/2021 | EPI_ISL_3876360 | 2021-09-02      |
| hCoV-19/Japan/PG-68913/2021 | EPI_ISL_3876361 | 2021-09-02      |
| hCoV-19/Japan/PG-68914/2021 | EPI_ISL_3876362 | 2021-09-02      |
| hCoV-19/Japan/PG-68915/2021 | EPI_ISL_3876363 | 2021-09-02      |
| hCoV-19/Japan/PG-68916/2021 | EPI_ISL_3876364 | 2021-09-02      |
| hCoV-19/Japan/PG-68917/2021 | EPI_ISL_3876365 | 2021-09-02      |
| hCoV-19/Japan/PG-68918/2021 | EPI_ISL_3876366 | 2021-09-02      |
| hCoV-19/Japan/PG-68919/2021 | EPI_ISL_3876367 | 2021-09-02      |
| hCoV-19/Japan/PG-68920/2021 | EPI_ISL_3876368 | 2021-09-02      |
| hCoV-19/Japan/PG-68921/2021 | EPI_ISL_3876369 | 2021-09-02      |
| hCoV-19/Japan/PG-68922/2021 | EPI_ISL_3876370 | 2021-09-02      |
| hCoV-19/Japan/PG-68923/2021 | EPI_ISL_3876371 | 2021-09-02      |
| hCoV-19/Japan/PG-68924/2021 | EPI_ISL_3876372 | 2021-09-02      |
| hCoV-19/Japan/PG-68925/2021 | EPI_ISL_3876373 | 2021-09-02      |

| virus_name                  | epiID           | submission_date |
|-----------------------------|-----------------|-----------------|
| hCoV-19/Japan/PG-68926/2021 | EPI_ISL_3876374 | 2021-09-02      |
| hCoV-19/Japan/PG-68927/2021 | EPI_ISL_3876375 | 2021-09-02      |
| hCoV-19/Japan/PG-68928/2021 | EPI_ISL_3876376 | 2021-09-02      |
| hCoV-19/Japan/PG-68929/2021 | EPI_ISL_3876377 | 2021-09-02      |
| hCoV-19/Japan/PG-68930/2021 | EPI_ISL_3876378 | 2021-09-02      |
| hCoV-19/Japan/PG-68931/2021 | EPI_ISL_3876379 | 2021-09-02      |
| hCoV-19/Japan/PG-68932/2021 | EPI_ISL_3876380 | 2021-09-02      |
| hCoV-19/Japan/PG-68933/2021 | EPI_ISL_3876381 | 2021-09-02      |
| hCoV-19/Japan/PG-68934/2021 | EPI_ISL_3876382 | 2021-09-02      |
| hCoV-19/Japan/PG-68935/2021 | EPI_ISL_3876383 | 2021-09-02      |
| hCoV-19/Japan/PG-68936/2021 | EPI_ISL_3876384 | 2021-09-02      |
| hCoV-19/Japan/PG-68937/2021 | EPI_ISL_3876385 | 2021-09-02      |
| hCoV-19/Japan/PG-68938/2021 | EPI_ISL_3876386 | 2021-09-02      |
| hCoV-19/Japan/PG-68939/2021 | EPI_ISL_3876387 | 2021-09-02      |
| hCoV-19/Japan/PG-68940/2021 | EPI_ISL_3876388 | 2021-09-02      |
| hCoV-19/Japan/PG-68941/2021 | EPI_ISL_3876389 | 2021-09-02      |
| hCoV-19/Japan/PG-68942/2021 | EPI_ISL_3876390 | 2021-09-02      |
| hCoV-19/Japan/PG-68943/2021 | EPI_ISL_3876391 | 2021-09-02      |
| hCoV-19/Japan/PG-68947/2021 | EPI_ISL_3876392 | 2021-09-02      |
| hCoV-19/Japan/PG-68950/2021 | EPI_ISL_3876393 | 2021-09-02      |
| hCoV-19/Japan/PG-68951/2021 | EPI_ISL_3876394 | 2021-09-02      |
| hCoV-19/Japan/PG-68952/2021 | EPI_ISL_3876395 | 2021-09-02      |
| hCoV-19/Japan/PG-68953/2021 | EPI_ISL_3876396 | 2021-09-02      |
| hCoV-19/Japan/PG-68961/2021 | EPI_ISL_3876397 | 2021-09-02      |
| hCoV-19/Japan/PG-68963/2021 | EPI_ISL_3876398 | 2021-09-02      |
| hCoV-19/Japan/PG-68964/2021 | EPI_ISL_3876399 | 2021-09-02      |
| hCoV-19/Japan/PG-68965/2021 | EPI_ISL_3876400 | 2021-09-02      |
| hCoV-19/Japan/PG-68966/2021 | EPI_ISL_3876401 | 2021-09-02      |
| hCoV-19/Japan/PG-68972/2021 | EPI_ISL_3876402 | 2021-09-02      |
| hCoV-19/Japan/PG-68977/2021 | EPI_ISL_3876403 | 2021-09-02      |
| hCoV-19/Japan/PG-68978/2021 | EPI_ISL_3876404 | 2021-09-02      |
| hCoV-19/Japan/PG-68979/2021 | EPI_ISL_3876405 | 2021-09-02      |
| hCoV-19/Japan/PG-68980/2021 | EPI_ISL_3870483 | 2021-09-02      |
| hCoV-19/Japan/PG-68981/2021 | EPI_ISL_3870484 | 2021-09-02      |
| hCoV-19/Japan/PG-68982/2021 | EPI_ISL_3870485 | 2021-09-02      |
| hCoV-19/Japan/PG-68983/2021 | EPI_ISL_3870486 | 2021-09-02      |
| hCoV-19/Japan/PG-68991/2021 | EPI_ISL_3875460 | 2021-09-02      |
| hCoV-19/Japan/PG-68992/2021 | EPI_ISL_3875461 | 2021-09-02      |
| hCoV-19/Japan/PG-68993/2021 | EPI_ISL_3875462 | 2021-09-02      |
| hCoV-19/Japan/PG-68994/2021 | EPI_ISL_3875463 | 2021-09-02      |
| hCoV-19/Japan/PG-68997/2021 | EPI_ISL_3875464 | 2021-09-02      |
| hCoV-19/Japan/PG-68998/2021 | EPI_ISL_3875465 | 2021-09-02      |
| hCoV-19/Japan/PG-68999/2021 | EPI_ISL_3875466 | 2021-09-02      |
| hCoV-19/Japan/PG-69000/2021 | EPI_ISL_3875467 | 2021-09-02      |
| hCoV-19/Japan/PG-69001/2021 | EPI_ISL_3875468 | 2021-09-02      |
| hCoV-19/Japan/PG-69002/2021 | EPI_ISL_3875469 | 2021-09-02      |
| hCoV-19/Japan/PG-69010/2021 | EPI_ISL_3875470 | 2021-09-02      |
| hCoV-19/Japan/PG-69011/2021 | EPI_ISL_3875471 | 2021-09-02      |
| hCoV-19/Japan/PG-69012/2021 | EPI_ISL_3875472 | 2021-09-02      |
| hCoV-19/Japan/PG-69013/2021 | EPI_ISL_3875473 | 2021-09-02      |
| hCoV-19/Japan/PG-69014/2021 | EPI_ISL_3875474 | 2021-09-02      |
| hCoV-19/Japan/PG-69015/2021 | EPI_ISL_3871387 | 2021-09-02      |
| hCoV-19/Japan/PG-69016/2021 | EPI_ISL_3871388 | 2021-09-02      |
| hCoV-19/Japan/PG-69017/2021 | EPI_ISL_3871389 | 2021-09-02      |

| virus_name                  | epiID           | submission_date |
|-----------------------------|-----------------|-----------------|
| hCoV-19/Japan/PG-69018/2021 | EPI_ISL_3871390 | 2021-09-02      |
| hCoV-19/Japan/PG-69024/2021 | EPI_ISL_3871391 | 2021-09-02      |
| hCoV-19/Japan/PG-69025/2021 | EPI_ISL_3871392 | 2021-09-02      |
| hCoV-19/Japan/PG-69026/2021 | EPI_ISL_3871393 | 2021-09-02      |
| hCoV-19/Japan/PG-69027/2021 | EPI_ISL_3871394 | 2021-09-02      |
| hCoV-19/Japan/PG-69035/2021 | EPI_ISL_3871746 | 2021-09-02      |
| hCoV-19/Japan/PG-69036/2021 | EPI_ISL_3871747 | 2021-09-02      |
| hCoV-19/Japan/PG-69037/2021 | EPI_ISL_3871748 | 2021-09-02      |
| hCoV-19/Japan/PG-69056/2021 | EPI_ISL_3872362 | 2021-09-02      |
| hCoV-19/Japan/PG-69057/2021 | EPI_ISL_3872363 | 2021-09-02      |
| hCoV-19/Japan/PG-69058/2021 | EPI_ISL_3872364 | 2021-09-02      |
| hCoV-19/Japan/PG-69059/2021 | EPI_ISL_3872365 | 2021-09-02      |
| hCoV-19/Japan/PG-69060/2021 | EPI_ISL_3872366 | 2021-09-02      |
| hCoV-19/Japan/PG-69062/2021 | EPI_ISL_3872367 | 2021-09-02      |
| hCoV-19/Japan/PG-69063/2021 | EPI_ISL_3872368 | 2021-09-02      |
| hCoV-19/Japan/PG-69064/2021 | EPI_ISL_3872369 | 2021-09-02      |
| hCoV-19/Japan/PG-69065/2021 | EPI_ISL_3872370 | 2021-09-02      |
| hCoV-19/Japan/PG-69066/2021 | EPI_ISL_3872371 | 2021-09-02      |
| hCoV-19/Japan/PG-69067/2021 | EPI_ISL_3872372 | 2021-09-02      |
| hCoV-19/Japan/PG-69068/2021 | EPI_ISL_3872373 | 2021-09-02      |
| hCoV-19/Japan/PG-69069/2021 | EPI_ISL_3872374 | 2021-09-02      |
| hCoV-19/Japan/PG-69070/2021 | EPI_ISL_3872375 | 2021-09-02      |
| hCoV-19/Japan/PG-69071/2021 | EPI_ISL_3872376 | 2021-09-02      |
| hCoV-19/Japan/PG-69072/2021 | EPI_ISL_3872377 | 2021-09-02      |
| hCoV-19/Japan/PG-69073/2021 | EPI_ISL_3872378 | 2021-09-02      |
| hCoV-19/Japan/PG-69074/2021 | EPI_ISL_3872379 | 2021-09-02      |
| hCoV-19/Japan/PG-69075/2021 | EPI_ISL_3872380 | 2021-09-02      |
| hCoV-19/Japan/PG-69076/2021 | EPI_ISL_3872381 | 2021-09-02      |
| hCoV-19/Japan/PG-69077/2021 | EPI_ISL_3872536 | 2021-09-02      |
| hCoV-19/Japan/PG-69078/2021 | EPI_ISL_3872537 | 2021-09-02      |
| hCoV-19/Japan/PG-69079/2021 | EPI_ISL_3872538 | 2021-09-02      |
| hCoV-19/Japan/PG-69080/2021 | EPI_ISL_3872539 | 2021-09-02      |
| hCoV-19/Japan/PG-69081/2021 | EPI_ISL_3872540 | 2021-09-02      |
| hCoV-19/Japan/PG-69082/2021 | EPI_ISL_3872541 | 2021-09-02      |
| hCoV-19/Japan/PG-69083/2021 | EPI_ISL_3872542 | 2021-09-02      |
| hCoV-19/Japan/PG-69084/2021 | EPI_ISL_3872543 | 2021-09-02      |
| hCoV-19/Japan/PG-69085/2021 | EPI_ISL_3872544 | 2021-09-02      |
| hCoV-19/Japan/PG-69086/2021 | EPI_ISL_3872545 | 2021-09-02      |
| hCoV-19/Japan/PG-69087/2021 | EPI_ISL_3872546 | 2021-09-02      |
| hCoV-19/Japan/PG-69088/2021 | EPI_ISL_3872547 | 2021-09-02      |
| hCoV-19/Japan/PG-69089/2021 | EPI_ISL_3872548 | 2021-09-02      |
| hCoV-19/Japan/PG-69090/2021 | EPI_ISL_3872549 | 2021-09-02      |
| hCoV-19/Japan/PG-69091/2021 | EPI_ISL_3872550 | 2021-09-02      |
| hCoV-19/Japan/PG-69092/2021 | EPI_ISL_3872551 | 2021-09-02      |
| hCoV-19/Japan/PG-69093/2021 | EPI_ISL_3872552 | 2021-09-02      |
| hCoV-19/Japan/PG-69094/2021 | EPI_ISL_3872553 | 2021-09-02      |
| hCoV-19/Japan/PG-69095/2021 | EPI_ISL_3872554 | 2021-09-02      |
| hCoV-19/Japan/PG-69096/2021 | EPI_ISL_3872555 | 2021-09-02      |
| hCoV-19/Japan/PG-69097/2021 | EPI_ISL_3872556 | 2021-09-02      |
| hCoV-19/Japan/PG-69098/2021 | EPI_ISL_3872557 | 2021-09-02      |
| hCoV-19/Japan/PG-69099/2021 | EPI_ISL_3872558 | 2021-09-02      |
| hCoV-19/Japan/PG-69100/2021 | EPI_ISL_3871563 | 2021-09-02      |
| hCoV-19/Japan/PG-69101/2021 | EPI_ISL_3874471 | 2021-09-02      |
| hCoV-19/Japan/PG-69102/2021 | EPI_ISL_3874472 | 2021-09-02      |

| virus_name                  | epiID           | submission_date |
|-----------------------------|-----------------|-----------------|
| hCoV-19/Japan/PG-69103/2021 | EPI_ISL_3874473 | 2021-09-02      |
| hCoV-19/Japan/PG-69104/2021 | EPI_ISL_3874474 | 2021-09-02      |
| hCoV-19/Japan/PG-69105/2021 | EPI_ISL_3874475 | 2021-09-02      |
| hCoV-19/Japan/PG-69106/2021 | EPI_ISL_3874476 | 2021-09-02      |
| hCoV-19/Japan/PG-69107/2021 | EPI_ISL_3874477 | 2021-09-02      |
| hCoV-19/Japan/PG-69108/2021 | EPI_ISL_3874478 | 2021-09-02      |
| hCoV-19/Japan/PG-69109/2021 | EPI_ISL_3872515 | 2021-09-02      |
| hCoV-19/Japan/PG-69115/2021 | EPI_ISL_3873956 | 2021-09-02      |
| hCoV-19/Japan/PG-69117/2021 | EPI_ISL_3871008 | 2021-09-02      |
| hCoV-19/Japan/PG-69118/2021 | EPI_ISL_3871009 | 2021-09-02      |
| hCoV-19/Japan/PG-69119/2021 | EPI_ISL_3871010 | 2021-09-02      |
| hCoV-19/Japan/PG-69120/2021 | EPI_ISL_3871011 | 2021-09-02      |
| hCoV-19/Japan/PG-69121/2021 | EPI_ISL_3871012 | 2021-09-02      |
| hCoV-19/Japan/PG-69123/2021 | EPI_ISL_3871164 | 2021-09-02      |
| hCoV-19/Japan/PG-69125/2021 | EPI_ISL_3871165 | 2021-09-02      |
| hCoV-19/Japan/PG-69129/2021 | EPI_ISL_3871166 | 2021-09-02      |
| hCoV-19/Japan/PG-69130/2021 | EPI_ISL_3871167 | 2021-09-02      |
| hCoV-19/Japan/PG-69131/2021 | EPI_ISL_3871168 | 2021-09-02      |
| hCoV-19/Japan/PG-69132/2021 | EPI_ISL_3871169 | 2021-09-02      |
| hCoV-19/Japan/PG-69133/2021 | EPI_ISL_3871170 | 2021-09-02      |
| hCoV-19/Japan/PG-69134/2021 | EPI_ISL_3871171 | 2021-09-02      |
| hCoV-19/Japan/PG-69135/2021 | EPI_ISL_3871172 | 2021-09-02      |
| hCoV-19/Japan/PG-69136/2021 | EPI_ISL_3871173 | 2021-09-02      |
| hCoV-19/Japan/PG-69137/2021 | EPI_ISL_3871174 | 2021-09-02      |
| hCoV-19/Japan/PG-69138/2021 | EPI_ISL_3871175 | 2021-09-02      |
| hCoV-19/Japan/PG-69139/2021 | EPI_ISL_3871176 | 2021-09-02      |
| hCoV-19/Japan/PG-69140/2021 | EPI_ISL_3871177 | 2021-09-02      |
| hCoV-19/Japan/PG-69141/2021 | EPI_ISL_3871178 | 2021-09-02      |
| hCoV-19/Japan/PG-69142/2021 | EPI_ISL_3871179 | 2021-09-02      |
| hCoV-19/Japan/PG-69143/2021 | EPI_ISL_3871180 | 2021-09-02      |
| hCoV-19/Japan/PG-69144/2021 | EPI_ISL_3871181 | 2021-09-02      |
| hCoV-19/Japan/PG-69145/2021 | EPI_ISL_3871967 | 2021-09-02      |
| hCoV-19/Japan/PG-69146/2021 | EPI_ISL_3871968 | 2021-09-02      |
| hCoV-19/Japan/PG-69147/2021 | EPI_ISL_3871969 | 2021-09-02      |
| hCoV-19/Japan/PG-69148/2021 | EPI_ISL_3871970 | 2021-09-02      |
| hCoV-19/Japan/PG-69149/2021 | EPI_ISL_3871971 | 2021-09-02      |
| hCoV-19/Japan/PG-69150/2021 | EPI_ISL_3871972 | 2021-09-02      |
| hCoV-19/Japan/PG-69151/2021 | EPI_ISL_3871973 | 2021-09-02      |
| hCoV-19/Japan/PG-69152/2021 | EPI_ISL_3871974 | 2021-09-02      |
| hCoV-19/Japan/PG-69153/2021 | EPI_ISL_3871975 | 2021-09-02      |
| hCoV-19/Japan/PG-69154/2021 | EPI_ISL_3871976 | 2021-09-02      |
| hCoV-19/Japan/PG-69155/2021 | EPI_ISL_3871977 | 2021-09-02      |
| hCoV-19/Japan/PG-69156/2021 | EPI_ISL_3871978 | 2021-09-02      |
| hCoV-19/Japan/PG-69157/2021 | EPI_ISL_3871979 | 2021-09-02      |
| hCoV-19/Japan/PG-69158/2021 | EPI_ISL_3871980 | 2021-09-02      |
| hCoV-19/Japan/PG-69163/2021 | EPI_ISL_3873338 | 2021-09-02      |
| hCoV-19/Japan/PG-69164/2021 | EPI_ISL_3873339 | 2021-09-02      |
| hCoV-19/Japan/PG-69165/2021 | EPI_ISL_3873340 | 2021-09-02      |
| hCoV-19/Japan/PG-69166/2021 | EPI_ISL_3873341 | 2021-09-02      |
| hCoV-19/Japan/PG-69167/2021 | EPI_ISL_3873342 | 2021-09-02      |
| hCoV-19/Japan/PG-69169/2021 | EPI_ISL_3873535 | 2021-09-02      |
| hCoV-19/Japan/PG-69170/2021 | EPI_ISL_3873536 | 2021-09-02      |
| hCoV-19/Japan/PG-69175/2021 | EPI_ISL_3873537 | 2021-09-02      |
| hCoV-19/Japan/PG-69176/2021 | EPI_ISL_3873538 | 2021-09-02      |

| virus_name                  | epiID           | submission_date |
|-----------------------------|-----------------|-----------------|
| hCoV-19/Japan/PG-69177/2021 | EPI_ISL_3873539 | 2021-09-02      |
| hCoV-19/Japan/PG-69178/2021 | EPI_ISL_3873540 | 2021-09-02      |
| hCoV-19/Japan/PG-69179/2021 | EPI_ISL_3873541 | 2021-09-02      |
| hCoV-19/Japan/PG-69180/2021 | EPI_ISL_3873542 | 2021-09-02      |
| hCoV-19/Japan/PG-69181/2021 | EPI_ISL_3873543 | 2021-09-02      |
| hCoV-19/Japan/PG-69182/2021 | EPI_ISL_3873544 | 2021-09-02      |
| hCoV-19/Japan/PG-69183/2021 | EPI_ISL_3873545 | 2021-09-02      |
| hCoV-19/Japan/PG-69184/2021 | EPI_ISL_3873546 | 2021-09-02      |
| hCoV-19/Japan/PG-69185/2021 | EPI_ISL_3873547 | 2021-09-02      |
| hCoV-19/Japan/PG-69186/2021 | EPI_ISL_3873548 | 2021-09-02      |
| hCoV-19/Japan/PG-69187/2021 | EPI_ISL_3873549 | 2021-09-02      |
| hCoV-19/Japan/PG-69188/2021 | EPI_ISL_3873550 | 2021-09-02      |
| hCoV-19/Japan/PG-69189/2021 | EPI_ISL_3873551 | 2021-09-02      |
| hCoV-19/Japan/PG-69190/2021 | EPI_ISL_3873552 | 2021-09-02      |
| hCoV-19/Japan/PG-69191/2021 | EPI_ISL_3873553 | 2021-09-02      |
| hCoV-19/Japan/PG-69192/2021 | EPI_ISL_3873554 | 2021-09-02      |
| hCoV-19/Japan/PG-69193/2021 | EPI_ISL_3873555 | 2021-09-02      |
| hCoV-19/Japan/PG-69194/2021 | EPI_ISL_3873556 | 2021-09-02      |
| hCoV-19/Japan/PG-69195/2021 | EPI_ISL_3873557 | 2021-09-02      |
| hCoV-19/Japan/PG-69207/2021 | EPI_ISL_3874713 | 2021-09-02      |
| hCoV-19/Japan/PG-69208/2021 | EPI_ISL_3874714 | 2021-09-02      |
| hCoV-19/Japan/PG-69209/2021 | EPI_ISL_3874715 | 2021-09-02      |
| hCoV-19/Japan/PG-69210/2021 | EPI_ISL_3874716 | 2021-09-02      |
| hCoV-19/Japan/PG-69211/2021 | EPI_ISL_3874717 | 2021-09-02      |
| hCoV-19/Japan/PG-69212/2021 | EPI_ISL_3874718 | 2021-09-02      |
| hCoV-19/Japan/PG-69213/2021 | EPI_ISL_3874719 | 2021-09-02      |
| hCoV-19/Japan/PG-69214/2021 | EPI_ISL_3874720 | 2021-09-02      |
| hCoV-19/Japan/PG-69215/2021 | EPI_ISL_3874721 | 2021-09-02      |
| hCoV-19/Japan/PG-69216/2021 | EPI_ISL_3874722 | 2021-09-02      |
| hCoV-19/Japan/PG-69217/2021 | EPI_ISL_3874723 | 2021-09-02      |
| hCoV-19/Japan/PG-69218/2021 | EPI_ISL_3874724 | 2021-09-02      |
| hCoV-19/Japan/PG-69219/2021 | EPI_ISL_3874725 | 2021-09-02      |
| hCoV-19/Japan/PG-69220/2021 | EPI_ISL_3874726 | 2021-09-02      |
| hCoV-19/Japan/PG-69221/2021 | EPI_ISL_3874727 | 2021-09-02      |
| hCoV-19/Japan/PG-69222/2021 | EPI_ISL_3874728 | 2021-09-02      |
| hCoV-19/Japan/PG-69223/2021 | EPI_ISL_3874729 | 2021-09-02      |
| hCoV-19/Japan/PG-69224/2021 | EPI_ISL_3874730 | 2021-09-02      |
| hCoV-19/Japan/PG-69225/2021 | EPI_ISL_3874731 | 2021-09-02      |
| hCoV-19/Japan/PG-69226/2021 | EPI_ISL_3874732 | 2021-09-02      |
| hCoV-19/Japan/PG-69227/2021 | EPI_ISL_3874733 | 2021-09-02      |
| hCoV-19/Japan/PG-69228/2021 | EPI_ISL_3874734 | 2021-09-02      |
| hCoV-19/Japan/PG-69229/2021 | EPI_ISL_3874735 | 2021-09-02      |
| hCoV-19/Japan/PG-69230/2021 | EPI_ISL_3874736 | 2021-09-02      |
| hCoV-19/Japan/PG-69231/2021 | EPI_ISL_3874737 | 2021-09-02      |
| hCoV-19/Japan/PG-69232/2021 | EPI_ISL_3874738 | 2021-09-02      |
| hCoV-19/Japan/PG-69233/2021 | EPI_ISL_3874739 | 2021-09-02      |
| hCoV-19/Japan/PG-69234/2021 | EPI_ISL_3874740 | 2021-09-02      |
| hCoV-19/Japan/PG-69309/2021 | EPI_ISL_3874741 | 2021-09-02      |
| hCoV-19/Japan/PG-69310/2021 | EPI_ISL_3874742 | 2021-09-02      |
| hCoV-19/Japan/PG-69311/2021 | EPI_ISL_3874743 | 2021-09-02      |
| hCoV-19/Japan/PG-69312/2021 | EPI_ISL_3874744 | 2021-09-02      |
| hCoV-19/Japan/PG-69313/2021 | EPI_ISL_3874745 | 2021-09-02      |
| hCoV-19/Japan/PG-69314/2021 | EPI_ISL_3874746 | 2021-09-02      |
| hCoV-19/Japan/PG-69315/2021 | EPI_ISL_3874747 | 2021-09-02      |

| virus_name                  | epiID           | submission_date |
|-----------------------------|-----------------|-----------------|
| hCoV-19/Japan/PG-69316/2021 | EPI_ISL_3874748 | 2021-09-02      |
| hCoV-19/Japan/PG-69317/2021 | EPI_ISL_3874749 | 2021-09-02      |
| hCoV-19/Japan/PG-69318/2021 | EPI_ISL_3874750 | 2021-09-02      |
| hCoV-19/Japan/PG-69319/2021 | EPI_ISL_3874751 | 2021-09-02      |
| hCoV-19/Japan/PG-69320/2021 | EPI_ISL_3874752 | 2021-09-02      |
| hCoV-19/Japan/PG-69321/2021 | EPI_ISL_3874753 | 2021-09-02      |
| hCoV-19/Japan/PG-69322/2021 | EPI_ISL_3874754 | 2021-09-02      |
| hCoV-19/Japan/PG-69323/2021 | EPI_ISL_3874755 | 2021-09-02      |
| hCoV-19/Japan/PG-69324/2021 | EPI_ISL_3874756 | 2021-09-02      |
| hCoV-19/Japan/PG-69325/2021 | EPI_ISL_3874757 | 2021-09-02      |
| hCoV-19/Japan/PG-69326/2021 | EPI_ISL_3874758 | 2021-09-02      |
| hCoV-19/Japan/PG-69327/2021 | EPI_ISL_3874759 | 2021-09-02      |
| hCoV-19/Japan/PG-69328/2021 | EPI_ISL_3875982 | 2021-09-02      |
| hCoV-19/Japan/PG-69329/2021 | EPI_ISL_3875983 | 2021-09-02      |
| hCoV-19/Japan/PG-69330/2021 | EPI_ISL_3875984 | 2021-09-02      |
| hCoV-19/Japan/PG-69331/2021 | EPI_ISL_3875985 | 2021-09-02      |
| hCoV-19/Japan/PG-69332/2021 | EPI_ISL_3875986 | 2021-09-02      |
| hCoV-19/Japan/PG-69333/2021 | EPI_ISL_3875987 | 2021-09-02      |
| hCoV-19/Japan/PG-69334/2021 | EPI_ISL_3875988 | 2021-09-02      |
| hCoV-19/Japan/PG-69335/2021 | EPI_ISL_3875989 | 2021-09-02      |
| hCoV-19/Japan/PG-69336/2021 | EPI_ISL_3875990 | 2021-09-02      |
| hCoV-19/Japan/PG-69337/2021 | EPI_ISL_3875991 | 2021-09-02      |
| hCoV-19/Japan/PG-69338/2021 | EPI_ISL_3875992 | 2021-09-02      |
| hCoV-19/Japan/PG-69339/2021 | EPI_ISL_3875993 | 2021-09-02      |
| hCoV-19/Japan/PG-69340/2021 | EPI_ISL_3875994 | 2021-09-02      |
| hCoV-19/Japan/PG-69341/2021 | EPI_ISL_3875995 | 2021-09-02      |
| hCoV-19/Japan/PG-69342/2021 | EPI_ISL_3875996 | 2021-09-02      |
| hCoV-19/Japan/PG-69346/2021 | EPI_ISL_3875997 | 2021-09-02      |
| hCoV-19/Japan/PG-69347/2021 | EPI_ISL_3875998 | 2021-09-02      |
| hCoV-19/Japan/PG-69348/2021 | EPI_ISL_3875999 | 2021-09-02      |
| hCoV-19/Japan/PG-69349/2021 | EPI_ISL_3876000 | 2021-09-02      |
| hCoV-19/Japan/PG-69352/2021 | EPI_ISL_3870549 | 2021-09-02      |
| hCoV-19/Japan/PG-69353/2021 | EPI_ISL_3870550 | 2021-09-02      |
| hCoV-19/Japan/PG-69354/2021 | EPI_ISL_3870551 | 2021-09-02      |
| hCoV-19/Japan/PG-69355/2021 | EPI_ISL_3870552 | 2021-09-02      |
| hCoV-19/Japan/PG-69358/2021 | EPI_ISL_3870553 | 2021-09-02      |
| hCoV-19/Japan/PG-69359/2021 | EPI_ISL_3870554 | 2021-09-02      |
| hCoV-19/Japan/PG-69360/2021 | EPI_ISL_3870555 | 2021-09-02      |
| hCoV-19/Japan/PG-69361/2021 | EPI_ISL_3870556 | 2021-09-02      |
| hCoV-19/Japan/PG-69362/2021 | EPI_ISL_3870557 | 2021-09-02      |
| hCoV-19/Japan/PG-69363/2021 | EPI_ISL_3870558 | 2021-09-02      |
| hCoV-19/Japan/PG-69364/2021 | EPI_ISL_3870559 | 2021-09-02      |
| hCoV-19/Japan/PG-69365/2021 | EPI_ISL_3870560 | 2021-09-02      |
| hCoV-19/Japan/PG-69366/2021 | EPI_ISL_3870561 | 2021-09-02      |
| hCoV-19/Japan/PG-69367/2021 | EPI_ISL_3870562 | 2021-09-02      |
| hCoV-19/Japan/PG-69390/2021 | EPI_ISL_3871182 | 2021-09-02      |
| hCoV-19/Japan/PG-69391/2021 | EPI_ISL_3871183 | 2021-09-02      |
| hCoV-19/Japan/PG-69392/2021 | EPI_ISL_3871184 | 2021-09-02      |
| hCoV-19/Japan/PG-69393/2021 | EPI_ISL_3871185 | 2021-09-02      |
| hCoV-19/Japan/PG-69394/2021 | EPI_ISL_3871186 | 2021-09-02      |
| hCoV-19/Japan/PG-69395/2021 | EPI_ISL_3871187 | 2021-09-02      |
| hCoV-19/Japan/PG-69396/2021 | EPI_ISL_3871188 | 2021-09-02      |
| hCoV-19/Japan/PG-69397/2021 | EPI_ISL_3871189 | 2021-09-02      |
| hCoV-19/Japan/PG-69408/2021 | EPI_ISL_3874006 | 2021-09-02      |



| virus_name                  | epiID           | submission_date |
|-----------------------------|-----------------|-----------------|
| hCoV-19/Japan/PG-69409/2021 | EPI_ISL_3874007 | 2021-09-02      |
| hCoV-19/Japan/PG-69410/2021 | EPI_ISL_3874008 | 2021-09-02      |
| hCoV-19/Japan/PG-69419/2021 | EPI_ISL_3870463 | 2021-09-02      |
| hCoV-19/Japan/PG-69420/2021 | EPI_ISL_3870464 | 2021-09-02      |
| hCoV-19/Japan/PG-69421/2021 | EPI_ISL_3874134 | 2021-09-02      |
| hCoV-19/Japan/PG-69422/2021 | EPI_ISL_3874135 | 2021-09-02      |
| hCoV-19/Japan/PG-69423/2021 | EPI_ISL_3874136 | 2021-09-02      |
| hCoV-19/Japan/PG-69424/2021 | EPI_ISL_3874137 | 2021-09-02      |
| hCoV-19/Japan/PG-69425/2021 | EPI_ISL_3874138 | 2021-09-02      |
| hCoV-19/Japan/PG-69426/2021 | EPI_ISL_3874139 | 2021-09-02      |
| hCoV-19/Japan/PG-69427/2021 | EPI_ISL_3874140 | 2021-09-02      |
| hCoV-19/Japan/PG-69428/2021 | EPI_ISL_3874141 | 2021-09-02      |
| hCoV-19/Japan/PG-69429/2021 | EPI_ISL_3874142 | 2021-09-02      |
| hCoV-19/Japan/PG-69430/2021 | EPI_ISL_3874143 | 2021-09-02      |
| hCoV-19/Japan/PG-69431/2021 | EPI_ISL_3874144 | 2021-09-02      |
| hCoV-19/Japan/PG-69432/2021 | EPI_ISL_3874145 | 2021-09-02      |
| hCoV-19/Japan/PG-69433/2021 | EPI_ISL_3874146 | 2021-09-02      |
| hCoV-19/Japan/PG-69442/2021 | EPI_ISL_3876406 | 2021-09-02      |
| hCoV-19/Japan/PG-69452/2021 | EPI_ISL_3876407 | 2021-09-02      |
| hCoV-19/Japan/PG-69454/2021 | EPI_ISL_3876408 | 2021-09-02      |
| hCoV-19/Japan/PG-69455/2021 | EPI_ISL_3876409 | 2021-09-02      |
| hCoV-19/Japan/PG-69456/2021 | EPI_ISL_3876410 | 2021-09-02      |
| hCoV-19/Japan/PG-69457/2021 | EPI_ISL_3876411 | 2021-09-02      |
| hCoV-19/Japan/PG-69458/2021 | EPI_ISL_3876412 | 2021-09-02      |
| hCoV-19/Japan/PG-69459/2021 | EPI_ISL_3876413 | 2021-09-02      |
| hCoV-19/Japan/PG-69460/2021 | EPI_ISL_3876414 | 2021-09-02      |
| hCoV-19/Japan/PG-69461/2021 | EPI_ISL_3876415 | 2021-09-02      |
| hCoV-19/Japan/PG-69462/2021 | EPI_ISL_3876416 | 2021-09-02      |
| hCoV-19/Japan/PG-69463/2021 | EPI_ISL_3876417 | 2021-09-02      |
| hCoV-19/Japan/PG-69464/2021 | EPI_ISL_3876418 | 2021-09-02      |
| hCoV-19/Japan/PG-69470/2021 | EPI_ISL_3876419 | 2021-09-02      |
| hCoV-19/Japan/PG-69471/2021 | EPI_ISL_3876420 | 2021-09-02      |
| hCoV-19/Japan/PG-69472/2021 | EPI_ISL_3876421 | 2021-09-02      |
| hCoV-19/Japan/PG-69473/2021 | EPI_ISL_3876422 | 2021-09-02      |
| hCoV-19/Japan/PG-69474/2021 | EPI_ISL_3876423 | 2021-09-02      |
| hCoV-19/Japan/PG-69475/2021 | EPI_ISL_3876424 | 2021-09-02      |
| hCoV-19/Japan/PG-69476/2021 | EPI_ISL_3876425 | 2021-09-02      |
| hCoV-19/Japan/PG-69477/2021 | EPI_ISL_3876426 | 2021-09-02      |
| hCoV-19/Japan/PG-69478/2021 | EPI_ISL_3876427 | 2021-09-02      |
| hCoV-19/Japan/PG-69479/2021 | EPI_ISL_3876428 | 2021-09-02      |
| hCoV-19/Japan/PG-69480/2021 | EPI_ISL_3876429 | 2021-09-02      |
| hCoV-19/Japan/PG-69481/2021 | EPI_ISL_3876430 | 2021-09-02      |
| hCoV-19/Japan/PG-69482/2021 | EPI_ISL_3876431 | 2021-09-02      |
| hCoV-19/Japan/PG-69483/2021 | EPI_ISL_3876432 | 2021-09-02      |
| hCoV-19/Japan/PG-69484/2021 | EPI_ISL_3876433 | 2021-09-02      |
| hCoV-19/Japan/PG-69485/2021 | EPI_ISL_3876434 | 2021-09-02      |
| hCoV-19/Japan/PG-69486/2021 | EPI_ISL_3876435 | 2021-09-02      |
| hCoV-19/Japan/PG-69487/2021 | EPI_ISL_3876436 | 2021-09-02      |
| hCoV-19/Japan/PG-69488/2021 | EPI_ISL_3876437 | 2021-09-02      |
| hCoV-19/Japan/PG-69489/2021 | EPI_ISL_3876438 | 2021-09-02      |
| hCoV-19/Japan/PG-69490/2021 | EPI_ISL_3876439 | 2021-09-02      |
| hCoV-19/Japan/PG-69498/2021 | EPI_ISL_3876440 | 2021-09-02      |
| hCoV-19/Japan/PG-69499/2021 | EPI_ISL_3876441 | 2021-09-02      |
| hCoV-19/Japan/PG-69500/2021 | EPI_ISL_3876442 | 2021-09-02      |

| virus_name                  | epiID           | submission_date |
|-----------------------------|-----------------|-----------------|
| hCoV-19/Japan/PG-69501/2021 | EPI_ISL_3876443 | 2021-09-02      |
| hCoV-19/Japan/PG-69502/2021 | EPI_ISL_3876444 | 2021-09-02      |
| hCoV-19/Japan/PG-69503/2021 | EPI_ISL_3876445 | 2021-09-02      |
| hCoV-19/Japan/PG-69504/2021 | EPI_ISL_3876446 | 2021-09-02      |
| hCoV-19/Japan/PG-69505/2021 | EPI_ISL_3876447 | 2021-09-02      |
| hCoV-19/Japan/PG-69506/2021 | EPI_ISL_3876448 | 2021-09-02      |
| hCoV-19/Japan/PG-69515/2021 | EPI_ISL_3876449 | 2021-09-02      |
| hCoV-19/Japan/PG-69535/2021 | EPI_ISL_3876450 | 2021-09-02      |
| hCoV-19/Japan/PG-69536/2021 | EPI_ISL_3876451 | 2021-09-02      |
| hCoV-19/Japan/PG-69537/2021 | EPI_ISL_3876452 | 2021-09-02      |
| hCoV-19/Japan/PG-69538/2021 | EPI_ISL_3876453 | 2021-09-02      |
| hCoV-19/Japan/PG-69539/2021 | EPI_ISL_3876454 | 2021-09-02      |
| hCoV-19/Japan/PG-69540/2021 | EPI_ISL_3876455 | 2021-09-02      |
| hCoV-19/Japan/PG-69541/2021 | EPI_ISL_3876456 | 2021-09-02      |
| hCoV-19/Japan/PG-69542/2021 | EPI_ISL_3876457 | 2021-09-02      |
| hCoV-19/Japan/PG-69543/2021 | EPI_ISL_3876458 | 2021-09-02      |
| hCoV-19/Japan/PG-69544/2021 | EPI_ISL_3876459 | 2021-09-02      |
| hCoV-19/Japan/PG-69545/2021 | EPI_ISL_3876460 | 2021-09-02      |
| hCoV-19/Japan/PG-69546/2021 | EPI_ISL_3876461 | 2021-09-02      |
| hCoV-19/Japan/PG-69547/2021 | EPI_ISL_3876462 | 2021-09-02      |
| hCoV-19/Japan/PG-69548/2021 | EPI_ISL_3876463 | 2021-09-02      |
| hCoV-19/Japan/PG-69549/2021 | EPI_ISL_3876464 | 2021-09-02      |
| hCoV-19/Japan/PG-69550/2021 | EPI_ISL_3876465 | 2021-09-02      |
| hCoV-19/Japan/PG-69562/2021 | EPI_ISL_3876466 | 2021-09-02      |
| hCoV-19/Japan/PG-69563/2021 | EPI_ISL_3876467 | 2021-09-02      |
| hCoV-19/Japan/PG-69564/2021 | EPI_ISL_3870563 | 2021-09-02      |
| hCoV-19/Japan/PG-69565/2021 | EPI_ISL_3870564 | 2021-09-02      |
| hCoV-19/Japan/PG-69566/2021 | EPI_ISL_3870565 | 2021-09-02      |
| hCoV-19/Japan/PG-69567/2021 | EPI_ISL_3870566 | 2021-09-02      |
| hCoV-19/Japan/PG-69568/2021 | EPI_ISL_3870567 | 2021-09-02      |
| hCoV-19/Japan/PG-69569/2021 | EPI_ISL_3870568 | 2021-09-02      |
| hCoV-19/Japan/PG-69570/2021 | EPI_ISL_3870569 | 2021-09-02      |
| hCoV-19/Japan/PG-69571/2021 | EPI_ISL_3870570 | 2021-09-02      |
| hCoV-19/Japan/PG-69572/2021 | EPI_ISL_3870571 | 2021-09-02      |
| hCoV-19/Japan/PG-69573/2021 | EPI_ISL_3870572 | 2021-09-02      |
| hCoV-19/Japan/PG-69574/2021 | EPI_ISL_3870573 | 2021-09-02      |
| hCoV-19/Japan/PG-69575/2021 | EPI_ISL_3870574 | 2021-09-02      |
| hCoV-19/Japan/PG-69576/2021 | EPI_ISL_3870575 | 2021-09-02      |
| hCoV-19/Japan/PG-69577/2021 | EPI_ISL_3870576 | 2021-09-02      |
| hCoV-19/Japan/PG-69578/2021 | EPI_ISL_3870577 | 2021-09-02      |
| hCoV-19/Japan/PG-69579/2021 | EPI_ISL_3870578 | 2021-09-02      |
| hCoV-19/Japan/PG-69580/2021 | EPI_ISL_3870579 | 2021-09-02      |
| hCoV-19/Japan/PG-69581/2021 | EPI_ISL_3870580 | 2021-09-02      |
| hCoV-19/Japan/PG-69582/2021 | EPI_ISL_3870581 | 2021-09-02      |
| hCoV-19/Japan/PG-69583/2021 | EPI_ISL_3870582 | 2021-09-02      |
| hCoV-19/Japan/PG-69584/2021 | EPI_ISL_3870583 | 2021-09-02      |
| hCoV-19/Japan/PG-69585/2021 | EPI_ISL_3870584 | 2021-09-02      |
| hCoV-19/Japan/PG-69586/2021 | EPI_ISL_3870585 | 2021-09-02      |
| hCoV-19/Japan/PG-69587/2021 | EPI_ISL_3870586 | 2021-09-02      |
| hCoV-19/Japan/PG-69588/2021 | EPI_ISL_3870587 | 2021-09-02      |
| hCoV-19/Japan/PG-69589/2021 | EPI_ISL_3870588 | 2021-09-02      |
| hCoV-19/Japan/PG-69590/2021 | EPI_ISL_3870589 | 2021-09-02      |
| hCoV-19/Japan/PG-69591/2021 | EPI_ISL_3870590 | 2021-09-02      |
| hCoV-19/Japan/PG-69592/2021 | EPI_ISL_3870591 | 2021-09-02      |

| virus_name                  | epiID           | submission_date |
|-----------------------------|-----------------|-----------------|
| hCoV-19/Japan/PG-69593/2021 | EPI_ISL_3870592 | 2021-09-02      |
| hCoV-19/Japan/PG-69594/2021 | EPI_ISL_3870593 | 2021-09-02      |
| hCoV-19/Japan/PG-69595/2021 | EPI_ISL_3870594 | 2021-09-02      |
| hCoV-19/Japan/PG-69596/2021 | EPI_ISL_3870595 | 2021-09-02      |
| hCoV-19/Japan/PG-69597/2021 | EPI_ISL_3870596 | 2021-09-02      |
| hCoV-19/Japan/PG-69598/2021 | EPI_ISL_3870597 | 2021-09-02      |
| hCoV-19/Japan/PG-69599/2021 | EPI_ISL_3870598 | 2021-09-02      |
| hCoV-19/Japan/PG-69600/2021 | EPI_ISL_3870599 | 2021-09-02      |
| hCoV-19/Japan/PG-69601/2021 | EPI_ISL_3870600 | 2021-09-02      |
| hCoV-19/Japan/PG-69602/2021 | EPI_ISL_3870601 | 2021-09-02      |
| hCoV-19/Japan/PG-69603/2021 | EPI_ISL_3870602 | 2021-09-02      |
| hCoV-19/Japan/PG-69604/2021 | EPI_ISL_3870603 | 2021-09-02      |
| hCoV-19/Japan/PG-69605/2021 | EPI_ISL_3870604 | 2021-09-02      |
| hCoV-19/Japan/PG-69606/2021 | EPI_ISL_3870605 | 2021-09-02      |
| hCoV-19/Japan/PG-69607/2021 | EPI_ISL_3870606 | 2021-09-02      |
| hCoV-19/Japan/PG-69610/2021 | EPI_ISL_3872136 | 2021-09-02      |
| hCoV-19/Japan/PG-69611/2021 | EPI_ISL_3872137 | 2021-09-02      |
| hCoV-19/Japan/PG-69612/2021 | EPI_ISL_3872138 | 2021-09-02      |
| hCoV-19/Japan/PG-69613/2021 | EPI_ISL_3872139 | 2021-09-02      |
| hCoV-19/Japan/PG-69614/2021 | EPI_ISL_3872140 | 2021-09-02      |
| hCoV-19/Japan/PG-69615/2021 | EPI_ISL_3872141 | 2021-09-02      |
| hCoV-19/Japan/PG-69616/2021 | EPI_ISL_3872143 | 2021-09-02      |
| hCoV-19/Japan/PG-69617/2021 | EPI_ISL_3872144 | 2021-09-02      |
| hCoV-19/Japan/PG-69618/2021 | EPI_ISL_3872145 | 2021-09-02      |
| hCoV-19/Japan/PG-69619/2021 | EPI_ISL_3872146 | 2021-09-02      |
| hCoV-19/Japan/PG-70703/2021 | EPI_ISL_3876468 | 2021-09-02      |
| hCoV-19/Japan/PG-70733/2021 | EPI_ISL_3876469 | 2021-09-02      |
| hCoV-19/Japan/PG-71301/2021 | EPI_ISL_3874760 | 2021-09-02      |
| hCoV-19/Japan/PG-71302/2021 | EPI_ISL_3874761 | 2021-09-02      |
| hCoV-19/Japan/PG-71303/2021 | EPI_ISL_3874762 | 2021-09-02      |
| hCoV-19/Japan/PG-71418/2021 | EPI_ISL_3874763 | 2021-09-02      |
| hCoV-19/Japan/PG-71419/2021 | EPI_ISL_3874764 | 2021-09-02      |
| hCoV-19/Japan/PG-71420/2021 | EPI_ISL_3874765 | 2021-09-02      |
| hCoV-19/Japan/PG-71421/2021 | EPI_ISL_3874766 | 2021-09-02      |
| hCoV-19/Japan/PG-71422/2021 | EPI_ISL_3874767 | 2021-09-02      |
| hCoV-19/Japan/PG-71423/2021 | EPI_ISL_3874768 | 2021-09-02      |
| hCoV-19/Japan/PG-71424/2021 | EPI_ISL_3874769 | 2021-09-02      |
| hCoV-19/Japan/PG-71425/2021 | EPI_ISL_3875475 | 2021-09-02      |
| hCoV-19/Japan/PG-71426/2021 | EPI_ISL_3875476 | 2021-09-02      |
| hCoV-19/Japan/PG-71427/2021 | EPI_ISL_3875477 | 2021-09-02      |
| hCoV-19/Japan/PG-71428/2021 | EPI_ISL_3875478 | 2021-09-02      |
| hCoV-19/Japan/PG-71429/2021 | EPI_ISL_3875479 | 2021-09-02      |
| hCoV-19/Japan/PG-71430/2021 | EPI_ISL_3875480 | 2021-09-02      |
| hCoV-19/Japan/PG-71431/2021 | EPI_ISL_3875481 | 2021-09-02      |
| hCoV-19/Japan/PG-71432/2021 | EPI_ISL_3875482 | 2021-09-02      |
| hCoV-19/Japan/PG-71433/2021 | EPI_ISL_3875483 | 2021-09-02      |
| hCoV-19/Japan/PG-71434/2021 | EPI_ISL_3875484 | 2021-09-02      |
| hCoV-19/Japan/PG-71435/2021 | EPI_ISL_3875485 | 2021-09-02      |
| hCoV-19/Japan/PG-71436/2021 | EPI_ISL_3875486 | 2021-09-02      |
| hCoV-19/Japan/PG-71437/2021 | EPI_ISL_3875487 | 2021-09-02      |
| hCoV-19/Japan/PG-71438/2021 | EPI_ISL_3875488 | 2021-09-02      |
| hCoV-19/Japan/PG-71439/2021 | EPI_ISL_3875489 | 2021-09-02      |
| hCoV-19/Japan/PG-71440/2021 | EPI_ISL_3875490 | 2021-09-02      |
| hCoV-19/Japan/PG-71441/2021 | EPI_ISL_3875491 | 2021-09-02      |

| virus_name                  | epiID           | submission_date |
|-----------------------------|-----------------|-----------------|
| hCoV-19/Japan/PG-71442/2021 | EPI_ISL_3875492 | 2021-09-02      |
| hCoV-19/Japan/PG-71443/2021 | EPI_ISL_3875493 | 2021-09-02      |
| hCoV-19/Japan/PG-71444/2021 | EPI_ISL_3875494 | 2021-09-02      |
| hCoV-19/Japan/PG-71445/2021 | EPI_ISL_3875495 | 2021-09-02      |
| hCoV-19/Japan/PG-71446/2021 | EPI_ISL_3875496 | 2021-09-02      |
| hCoV-19/Japan/PG-71447/2021 | EPI_ISL_3875497 | 2021-09-02      |
| hCoV-19/Japan/PG-71448/2021 | EPI_ISL_3875498 | 2021-09-02      |
| hCoV-19/Japan/PG-71449/2021 | EPI_ISL_3875499 | 2021-09-02      |
| hCoV-19/Japan/PG-71450/2021 | EPI_ISL_3875500 | 2021-09-02      |
| hCoV-19/Japan/PG-71451/2021 | EPI_ISL_3875501 | 2021-09-02      |
| hCoV-19/Japan/PG-71452/2021 | EPI_ISL_3875502 | 2021-09-02      |
| hCoV-19/Japan/PG-71453/2021 | EPI_ISL_3875503 | 2021-09-02      |
| hCoV-19/Japan/PG-71454/2021 | EPI_ISL_3875504 | 2021-09-02      |
| hCoV-19/Japan/PG-71455/2021 | EPI_ISL_3875505 | 2021-09-02      |
| hCoV-19/Japan/PG-71456/2021 | EPI_ISL_3875506 | 2021-09-02      |
| hCoV-19/Japan/PG-71457/2021 | EPI_ISL_3875507 | 2021-09-02      |
| hCoV-19/Japan/PG-71458/2021 | EPI_ISL_3875508 | 2021-09-02      |
| hCoV-19/Japan/PG-71459/2021 | EPI_ISL_3875509 | 2021-09-02      |
| hCoV-19/Japan/PG-71460/2021 | EPI_ISL_3875510 | 2021-09-02      |
| hCoV-19/Japan/PG-71461/2021 | EPI_ISL_3875511 | 2021-09-02      |
| hCoV-19/Japan/PG-71462/2021 | EPI_ISL_3875512 | 2021-09-02      |
| hCoV-19/Japan/PG-71463/2021 | EPI_ISL_3875513 | 2021-09-02      |
| hCoV-19/Japan/PG-71464/2021 | EPI_ISL_3875514 | 2021-09-02      |
| hCoV-19/Japan/PG-71465/2021 | EPI_ISL_3875515 | 2021-09-02      |
| hCoV-19/Japan/PG-71466/2021 | EPI_ISL_3875516 | 2021-09-02      |
| hCoV-19/Japan/PG-71467/2021 | EPI_ISL_3875517 | 2021-09-02      |
| hCoV-19/Japan/PG-71468/2021 | EPI_ISL_3875518 | 2021-09-02      |
| hCoV-19/Japan/PG-71469/2021 | EPI_ISL_3875519 | 2021-09-02      |
| hCoV-19/Japan/PG-71470/2021 | EPI_ISL_3875520 | 2021-09-02      |
| hCoV-19/Japan/PG-71471/2021 | EPI_ISL_3875521 | 2021-09-02      |
| hCoV-19/Japan/PG-71472/2021 | EPI_ISL_3875522 | 2021-09-02      |
| hCoV-19/Japan/PG-71473/2021 | EPI_ISL_3871749 | 2021-09-02      |
| hCoV-19/Japan/PG-71486/2021 | EPI_ISL_3871750 | 2021-09-02      |
| hCoV-19/Japan/PG-71487/2021 | EPI_ISL_3871751 | 2021-09-02      |
| hCoV-19/Japan/PG-71488/2021 | EPI_ISL_3876001 | 2021-09-02      |
| hCoV-19/Japan/PG-71489/2021 | EPI_ISL_3876002 | 2021-09-02      |
| hCoV-19/Japan/PG-71490/2021 | EPI_ISL_3876003 | 2021-09-02      |
| hCoV-19/Japan/PG-71491/2021 | EPI_ISL_3876004 | 2021-09-02      |
| hCoV-19/Japan/PG-71492/2021 | EPI_ISL_3876005 | 2021-09-02      |
| hCoV-19/Japan/PG-71493/2021 | EPI_ISL_3876006 | 2021-09-02      |
| hCoV-19/Japan/PG-71494/2021 | EPI_ISL_3875722 | 2021-09-02      |
| hCoV-19/Japan/PG-71495/2021 | EPI_ISL_3875725 | 2021-09-02      |
| hCoV-19/Japan/PG-71506/2021 | EPI_ISL_3875729 | 2021-09-02      |
| hCoV-19/Japan/PG-71507/2021 | EPI_ISL_3875732 | 2021-09-02      |
| hCoV-19/Japan/PG-71508/2021 | EPI_ISL_3875735 | 2021-09-02      |
| hCoV-19/Japan/PG-71509/2021 | EPI_ISL_3875738 | 2021-09-02      |
| hCoV-19/Japan/PG-71510/2021 | EPI_ISL_3875741 | 2021-09-02      |
| hCoV-19/Japan/PG-71511/2021 | EPI_ISL_3875744 | 2021-09-02      |
| hCoV-19/Japan/PG-71512/2021 | EPI_ISL_3875747 | 2021-09-02      |
| hCoV-19/Japan/PG-71513/2021 | EPI_ISL_3875751 | 2021-09-02      |
| hCoV-19/Japan/PG-71514/2021 | EPI_ISL_3875754 | 2021-09-02      |
| hCoV-19/Japan/PG-71515/2021 | EPI_ISL_3875757 | 2021-09-02      |
| hCoV-19/Japan/PG-71518/2021 | EPI_ISL_3870607 | 2021-09-02      |
| hCoV-19/Japan/PG-71519/2021 | EPI_ISL_3870608 | 2021-09-02      |

| virus_name                  | epiID           | submission_date |
|-----------------------------|-----------------|-----------------|
| hCoV-19/Japan/PG-71520/2021 | EPI_ISL_3870609 | 2021-09-02      |
| hCoV-19/Japan/PG-71521/2021 | EPI_ISL_3870610 | 2021-09-02      |
| hCoV-19/Japan/PG-71522/2021 | EPI_ISL_3870611 | 2021-09-02      |
| hCoV-19/Japan/PG-71523/2021 | EPI_ISL_3870612 | 2021-09-02      |
| hCoV-19/Japan/PG-71524/2021 | EPI_ISL_3870613 | 2021-09-02      |
| hCoV-19/Japan/PG-71525/2021 | EPI_ISL_3870614 | 2021-09-02      |
| hCoV-19/Japan/PG-71526/2021 | EPI_ISL_3872559 | 2021-09-02      |
| hCoV-19/Japan/PG-71527/2021 | EPI_ISL_3872560 | 2021-09-02      |
| hCoV-19/Japan/PG-71528/2021 | EPI_ISL_3872561 | 2021-09-02      |
| hCoV-19/Japan/PG-71529/2021 | EPI_ISL_3872562 | 2021-09-02      |
| hCoV-19/Japan/PG-71530/2021 | EPI_ISL_3872563 | 2021-09-02      |
| hCoV-19/Japan/PG-71531/2021 | EPI_ISL_3872564 | 2021-09-02      |
| hCoV-19/Japan/PG-71532/2021 | EPI_ISL_3872565 | 2021-09-02      |
| hCoV-19/Japan/PG-71533/2021 | EPI_ISL_3872566 | 2021-09-02      |
| hCoV-19/Japan/PG-71534/2021 | EPI_ISL_3872567 | 2021-09-02      |
| hCoV-19/Japan/PG-71535/2021 | EPI_ISL_3872568 | 2021-09-02      |
| hCoV-19/Japan/PG-71536/2021 | EPI_ISL_3872569 | 2021-09-02      |
| hCoV-19/Japan/PG-71537/2021 | EPI_ISL_3872570 | 2021-09-02      |
| hCoV-19/Japan/PG-71538/2021 | EPI_ISL_3872571 | 2021-09-02      |
| hCoV-19/Japan/PG-71539/2021 | EPI_ISL_3872572 | 2021-09-02      |
| hCoV-19/Japan/PG-71540/2021 | EPI_ISL_3872573 | 2021-09-02      |
| hCoV-19/Japan/PG-71541/2021 | EPI_ISL_3872574 | 2021-09-02      |
| hCoV-19/Japan/PG-71542/2021 | EPI_ISL_3872575 | 2021-09-02      |
| hCoV-19/Japan/PG-71543/2021 | EPI_ISL_3872576 | 2021-09-02      |
| hCoV-19/Japan/PG-71544/2021 | EPI_ISL_3872577 | 2021-09-02      |
| hCoV-19/Japan/PG-71545/2021 | EPI_ISL_3872578 | 2021-09-02      |
| hCoV-19/Japan/PG-71546/2021 | EPI_ISL_3872579 | 2021-09-02      |
| hCoV-19/Japan/PG-71550/2021 | EPI_ISL_3871681 | 2021-09-02      |
| hCoV-19/Japan/PG-71551/2021 | EPI_ISL_3871682 | 2021-09-02      |
| hCoV-19/Japan/PG-71552/2021 | EPI_ISL_3874479 | 2021-09-02      |
| hCoV-19/Japan/PG-71553/2021 | EPI_ISL_3874480 | 2021-09-02      |
| hCoV-19/Japan/PG-71554/2021 | EPI_ISL_3874481 | 2021-09-02      |
| hCoV-19/Japan/PG-71555/2021 | EPI_ISL_3874482 | 2021-09-02      |
| hCoV-19/Japan/PG-71556/2021 | EPI_ISL_3874483 | 2021-09-02      |
| hCoV-19/Japan/PG-71557/2021 | EPI_ISL_3874484 | 2021-09-02      |
| hCoV-19/Japan/PG-71558/2021 | EPI_ISL_3874485 | 2021-09-02      |
| hCoV-19/Japan/PG-71559/2021 | EPI_ISL_3874486 | 2021-09-02      |
| hCoV-19/Japan/PG-71562/2021 | EPI_ISL_3873957 | 2021-09-02      |
| hCoV-19/Japan/PG-71563/2021 | EPI_ISL_3873958 | 2021-09-02      |
| hCoV-19/Japan/PG-71564/2021 | EPI_ISL_3873959 | 2021-09-02      |
| hCoV-19/Japan/PG-71565/2021 | EPI_ISL_3873960 | 2021-09-02      |
| hCoV-19/Japan/PG-71566/2021 | EPI_ISL_3873961 | 2021-09-02      |
| hCoV-19/Japan/PG-71567/2021 | EPI_ISL_3873962 | 2021-09-02      |
| hCoV-19/Japan/PG-71568/2021 | EPI_ISL_3873963 | 2021-09-02      |
| hCoV-19/Japan/PG-71569/2021 | EPI_ISL_3873964 | 2021-09-02      |
| hCoV-19/Japan/PG-71570/2021 | EPI_ISL_3873343 | 2021-09-02      |
| hCoV-19/Japan/PG-71571/2021 | EPI_ISL_3873344 | 2021-09-02      |
| hCoV-19/Japan/PG-71572/2021 | EPI_ISL_3873345 | 2021-09-02      |
| hCoV-19/Japan/PG-71573/2021 | EPI_ISL_3873346 | 2021-09-02      |
| hCoV-19/Japan/PG-71574/2021 | EPI_ISL_3873347 | 2021-09-02      |
| hCoV-19/Japan/PG-71575/2021 | EPI_ISL_3873348 | 2021-09-02      |
| hCoV-19/Japan/PG-71576/2021 | EPI_ISL_3873349 | 2021-09-02      |
| hCoV-19/Japan/PG-71577/2021 | EPI_ISL_3873350 | 2021-09-02      |
| hCoV-19/Japan/PG-71578/2021 | EPI_ISL_3873351 | 2021-09-02      |

| virus_name                  | epiID           | submission_date |
|-----------------------------|-----------------|-----------------|
| hCoV-19/Japan/PG-71579/2021 | EPI_ISL_3873352 | 2021-09-02      |
| hCoV-19/Japan/PG-71580/2021 | EPI_ISL_3873353 | 2021-09-02      |
| hCoV-19/Japan/PG-71581/2021 | EPI_ISL_3874399 | 2021-09-02      |
| hCoV-19/Japan/PG-71586/2021 | EPI_ISL_3872147 | 2021-09-02      |
| hCoV-19/Japan/PG-71587/2021 | EPI_ISL_3872148 | 2021-09-02      |
| hCoV-19/Japan/PG-71588/2021 | EPI_ISL_3872149 | 2021-09-02      |
| hCoV-19/Japan/PG-71589/2021 | EPI_ISL_3872150 | 2021-09-02      |
| hCoV-19/Japan/PG-71590/2021 | EPI_ISL_3872238 | 2021-09-02      |
| hCoV-19/Japan/PG-71591/2021 | EPI_ISL_3872239 | 2021-09-02      |
| hCoV-19/Japan/PG-71592/2021 | EPI_ISL_3872240 | 2021-09-02      |
| hCoV-19/Japan/PG-71593/2021 | EPI_ISL_3872241 | 2021-09-02      |
| hCoV-19/Japan/PG-71594/2021 | EPI_ISL_3872242 | 2021-09-02      |
| hCoV-19/Japan/PG-71595/2021 | EPI_ISL_3872243 | 2021-09-02      |
| hCoV-19/Japan/PG-71596/2021 | EPI_ISL_3872244 | 2021-09-02      |
| hCoV-19/Japan/PG-71597/2021 | EPI_ISL_3872245 | 2021-09-02      |
| hCoV-19/Japan/PG-71598/2021 | EPI_ISL_3876470 | 2021-09-02      |
| hCoV-19/Japan/PG-71599/2021 | EPI_ISL_3876471 | 2021-09-02      |
| hCoV-19/Japan/PG-71600/2021 | EPI_ISL_3876472 | 2021-09-02      |
| hCoV-19/Japan/PG-71601/2021 | EPI_ISL_3876473 | 2021-09-02      |
| hCoV-19/Japan/PG-71602/2021 | EPI_ISL_3876474 | 2021-09-02      |
| hCoV-19/Japan/PG-71603/2021 | EPI_ISL_3876475 | 2021-09-02      |
| hCoV-19/Japan/PG-71606/2021 | EPI_ISL_3876476 | 2021-09-02      |
| hCoV-19/Japan/PG-71607/2021 | EPI_ISL_3876477 | 2021-09-02      |
| hCoV-19/Japan/PG-71608/2021 | EPI_ISL_3876478 | 2021-09-02      |
| hCoV-19/Japan/PG-71609/2021 | EPI_ISL_3876479 | 2021-09-02      |
| hCoV-19/Japan/PG-71610/2021 | EPI_ISL_3876480 | 2021-09-02      |
| hCoV-19/Japan/PG-71611/2021 | EPI_ISL_3876483 | 2021-09-02      |
| hCoV-19/Japan/PG-71612/2021 | EPI_ISL_3876486 | 2021-09-02      |
| hCoV-19/Japan/PG-71613/2021 | EPI_ISL_3876490 | 2021-09-02      |
| hCoV-19/Japan/PG-71614/2021 | EPI_ISL_3876493 | 2021-09-02      |
| hCoV-19/Japan/PG-71615/2021 | EPI_ISL_3876494 | 2021-09-02      |
| hCoV-19/Japan/PG-71616/2021 | EPI_ISL_3876495 | 2021-09-02      |
| hCoV-19/Japan/PG-71617/2021 | EPI_ISL_3876496 | 2021-09-02      |
| hCoV-19/Japan/PG-71618/2021 | EPI_ISL_3876497 | 2021-09-02      |
| hCoV-19/Japan/PG-71619/2021 | EPI_ISL_3876498 | 2021-09-02      |
| hCoV-19/Japan/PG-71620/2021 | EPI_ISL_3876499 | 2021-09-02      |
| hCoV-19/Japan/PG-71622/2021 | EPI_ISL_3876500 | 2021-09-02      |
| hCoV-19/Japan/PG-71623/2021 | EPI_ISL_3876501 | 2021-09-02      |
| hCoV-19/Japan/PG-71624/2021 | EPI_ISL_3876502 | 2021-09-02      |
| hCoV-19/Japan/PG-71625/2021 | EPI_ISL_3876503 | 2021-09-02      |
| hCoV-19/Japan/PG-71626/2021 | EPI_ISL_3876504 | 2021-09-02      |
| hCoV-19/Japan/PG-71627/2021 | EPI_ISL_3876505 | 2021-09-02      |
| hCoV-19/Japan/PG-71628/2021 | EPI_ISL_3876506 | 2021-09-02      |
| hCoV-19/Japan/PG-71629/2021 | EPI_ISL_3876507 | 2021-09-02      |
| hCoV-19/Japan/PG-71630/2021 | EPI_ISL_3876508 | 2021-09-02      |
| hCoV-19/Japan/PG-71631/2021 | EPI_ISL_3876509 | 2021-09-02      |
| hCoV-19/Japan/PG-71632/2021 | EPI_ISL_3876510 | 2021-09-02      |
| hCoV-19/Japan/PG-71633/2021 | EPI_ISL_3876511 | 2021-09-02      |
| hCoV-19/Japan/PG-71634/2021 | EPI_ISL_3876512 | 2021-09-02      |
| hCoV-19/Japan/PG-71635/2021 | EPI_ISL_3876513 | 2021-09-02      |
| hCoV-19/Japan/PG-71636/2021 | EPI_ISL_3876514 | 2021-09-02      |
| hCoV-19/Japan/PG-71637/2021 | EPI_ISL_3876515 | 2021-09-02      |
| hCoV-19/Japan/PG-71638/2021 | EPI_ISL_3876516 | 2021-09-02      |
| hCoV-19/Japan/PG-71639/2021 | EPI_ISL_3876517 | 2021-09-02      |

| virus_name                  | epiID           | submission_date |
|-----------------------------|-----------------|-----------------|
| hCoV-19/Japan/PG-71640/2021 | EPI_ISL_3876518 | 2021-09-02      |
| hCoV-19/Japan/PG-71641/2021 | EPI_ISL_3876519 | 2021-09-02      |
| hCoV-19/Japan/PG-71642/2021 | EPI_ISL_3876520 | 2021-09-02      |
| hCoV-19/Japan/PG-71643/2021 | EPI_ISL_3876521 | 2021-09-02      |
| hCoV-19/Japan/PG-71644/2021 | EPI_ISL_3876522 | 2021-09-02      |
| hCoV-19/Japan/PG-71645/2021 | EPI_ISL_3876523 | 2021-09-02      |
| hCoV-19/Japan/PG-71646/2021 | EPI_ISL_3876524 | 2021-09-02      |
| hCoV-19/Japan/PG-71647/2021 | EPI_ISL_3876525 | 2021-09-02      |
| hCoV-19/Japan/PG-71648/2021 | EPI_ISL_3876526 | 2021-09-02      |
| hCoV-19/Japan/PG-71649/2021 | EPI_ISL_3876527 | 2021-09-02      |
| hCoV-19/Japan/PG-71650/2021 | EPI_ISL_3876528 | 2021-09-02      |
| hCoV-19/Japan/PG-71651/2021 | EPI_ISL_3876529 | 2021-09-02      |
| hCoV-19/Japan/PG-71652/2021 | EPI_ISL_3876530 | 2021-09-02      |
| hCoV-19/Japan/PG-71653/2021 | EPI_ISL_3876531 | 2021-09-02      |
| hCoV-19/Japan/PG-71654/2021 | EPI_ISL_3876532 | 2021-09-02      |
| hCoV-19/Japan/PG-71655/2021 | EPI_ISL_3876533 | 2021-09-02      |
| hCoV-19/Japan/PG-71656/2021 | EPI_ISL_3876534 | 2021-09-02      |
| hCoV-19/Japan/PG-71657/2021 | EPI_ISL_3876535 | 2021-09-02      |
| hCoV-19/Japan/PG-71658/2021 | EPI_ISL_3876536 | 2021-09-02      |
| hCoV-19/Japan/PG-71659/2021 | EPI_ISL_3876537 | 2021-09-02      |
| hCoV-19/Japan/PG-71660/2021 | EPI_ISL_3876538 | 2021-09-02      |
| hCoV-19/Japan/PG-71661/2021 | EPI_ISL_3876539 | 2021-09-02      |
| hCoV-19/Japan/PG-71662/2021 | EPI_ISL_3876540 | 2021-09-02      |
| hCoV-19/Japan/PG-71663/2021 | EPI_ISL_3876542 | 2021-09-02      |
| hCoV-19/Japan/PG-71664/2021 | EPI_ISL_3876544 | 2021-09-02      |
| hCoV-19/Japan/PG-71665/2021 | EPI_ISL_3876546 | 2021-09-02      |
| hCoV-19/Japan/PG-71666/2021 | EPI_ISL_3876548 | 2021-09-02      |
| hCoV-19/Japan/PG-71667/2021 | EPI_ISL_3876550 | 2021-09-02      |
| hCoV-19/Japan/PG-71668/2021 | EPI_ISL_3876552 | 2021-09-02      |
| hCoV-19/Japan/PG-71669/2021 | EPI_ISL_3876555 | 2021-09-02      |
| hCoV-19/Japan/PG-71670/2021 | EPI_ISL_3876557 | 2021-09-02      |
| hCoV-19/Japan/PG-71671/2021 | EPI_ISL_3876559 | 2021-09-02      |
| hCoV-19/Japan/PG-71672/2021 | EPI_ISL_3876561 | 2021-09-02      |
| hCoV-19/Japan/PG-71673/2021 | EPI_ISL_3876563 | 2021-09-02      |
| hCoV-19/Japan/PG-71674/2021 | EPI_ISL_3876565 | 2021-09-02      |
| hCoV-19/Japan/PG-71675/2021 | EPI_ISL_3876567 | 2021-09-02      |
| hCoV-19/Japan/PG-71676/2021 | EPI_ISL_3876569 | 2021-09-02      |
| hCoV-19/Japan/PG-71677/2021 | EPI_ISL_3876571 | 2021-09-02      |
| hCoV-19/Japan/PG-71678/2021 | EPI_ISL_3876574 | 2021-09-02      |
| hCoV-19/Japan/PG-71679/2021 | EPI_ISL_3876576 | 2021-09-02      |
| hCoV-19/Japan/PG-71680/2021 | EPI_ISL_3876579 | 2021-09-02      |
| hCoV-19/Japan/PG-71681/2021 | EPI_ISL_3876581 | 2021-09-02      |
| hCoV-19/Japan/PG-71682/2021 | EPI_ISL_3876583 | 2021-09-02      |
| hCoV-19/Japan/PG-71683/2021 | EPI_ISL_3876586 | 2021-09-02      |
| hCoV-19/Japan/PG-71684/2021 | EPI_ISL_3876588 | 2021-09-02      |
| hCoV-19/Japan/PG-71685/2021 | EPI_ISL_3876590 | 2021-09-02      |
| hCoV-19/Japan/PG-71686/2021 | EPI_ISL_3876592 | 2021-09-02      |
| hCoV-19/Japan/PG-71687/2021 | EPI_ISL_3876594 | 2021-09-02      |
| hCoV-19/Japan/PG-71688/2021 | EPI_ISL_3876596 | 2021-09-02      |
| hCoV-19/Japan/PG-71689/2021 | EPI_ISL_3876599 | 2021-09-02      |
| hCoV-19/Japan/PG-71690/2021 | EPI_ISL_3876601 | 2021-09-02      |
| hCoV-19/Japan/PG-71691/2021 | EPI_ISL_3876604 | 2021-09-02      |
| hCoV-19/Japan/PG-71692/2021 | EPI_ISL_3876606 | 2021-09-02      |
| hCoV-19/Japan/PG-71693/2021 | EPI_ISL_3876607 | 2021-09-02      |

| virus_name                  | epiID           | submission_date |
|-----------------------------|-----------------|-----------------|
| hCoV-19/Japan/PG-71694/2021 | EPI_ISL_3876609 | 2021-09-02      |
| hCoV-19/Japan/PG-71695/2021 | EPI_ISL_3876611 | 2021-09-02      |
| hCoV-19/Japan/PG-71696/2021 | EPI_ISL_3876613 | 2021-09-02      |
| hCoV-19/Japan/PG-71697/2021 | EPI_ISL_3876614 | 2021-09-02      |
| hCoV-19/Japan/PG-71698/2021 | EPI_ISL_3876616 | 2021-09-02      |
| hCoV-19/Japan/PG-71699/2021 | EPI_ISL_3876618 | 2021-09-02      |
| hCoV-19/Japan/PG-71700/2021 | EPI_ISL_3876620 | 2021-09-02      |
| hCoV-19/Japan/PG-71701/2021 | EPI_ISL_3876622 | 2021-09-02      |
| hCoV-19/Japan/PG-71702/2021 | EPI_ISL_3876624 | 2021-09-02      |
| hCoV-19/Japan/PG-71703/2021 | EPI_ISL_3876626 | 2021-09-02      |
| hCoV-19/Japan/PG-71704/2021 | EPI_ISL_3876629 | 2021-09-02      |
| hCoV-19/Japan/PG-71705/2021 | EPI_ISL_3876632 | 2021-09-02      |
| hCoV-19/Japan/PG-71706/2021 | EPI_ISL_3876634 | 2021-09-02      |
| hCoV-19/Japan/PG-71707/2021 | EPI_ISL_3876637 | 2021-09-02      |
| hCoV-19/Japan/PG-71708/2021 | EPI_ISL_3876639 | 2021-09-02      |
| hCoV-19/Japan/PG-71709/2021 | EPI_ISL_3876641 | 2021-09-02      |
| hCoV-19/Japan/PG-71710/2021 | EPI_ISL_3876643 | 2021-09-02      |
| hCoV-19/Japan/PG-71711/2021 | EPI_ISL_3876646 | 2021-09-02      |
| hCoV-19/Japan/PG-71712/2021 | EPI_ISL_3876649 | 2021-09-02      |
| hCoV-19/Japan/PG-71713/2021 | EPI_ISL_3876651 | 2021-09-02      |
| hCoV-19/Japan/PG-71714/2021 | EPI_ISL_3876653 | 2021-09-02      |
| hCoV-19/Japan/PG-71715/2021 | EPI_ISL_3876655 | 2021-09-02      |
| hCoV-19/Japan/PG-71716/2021 | EPI_ISL_3876657 | 2021-09-02      |
| hCoV-19/Japan/PG-71717/2021 | EPI_ISL_3876660 | 2021-09-02      |
| hCoV-19/Japan/PG-71718/2021 | EPI_ISL_3876663 | 2021-09-02      |
| hCoV-19/Japan/PG-71719/2021 | EPI_ISL_3876665 | 2021-09-02      |
| hCoV-19/Japan/PG-71720/2021 | EPI_ISL_3876668 | 2021-09-02      |
| hCoV-19/Japan/PG-71721/2021 | EPI_ISL_3876671 | 2021-09-02      |
| hCoV-19/Japan/PG-71722/2021 | EPI_ISL_3876674 | 2021-09-02      |
| hCoV-19/Japan/PG-71723/2021 | EPI_ISL_3876676 | 2021-09-02      |
| hCoV-19/Japan/PG-71724/2021 | EPI_ISL_3876679 | 2021-09-02      |
| hCoV-19/Japan/PG-71725/2021 | EPI_ISL_3876681 | 2021-09-02      |
| hCoV-19/Japan/PG-71726/2021 | EPI_ISL_3876684 | 2021-09-02      |
| hCoV-19/Japan/PG-71727/2021 | EPI_ISL_3876686 | 2021-09-02      |
| hCoV-19/Japan/PG-71728/2021 | EPI_ISL_3876688 | 2021-09-02      |
| hCoV-19/Japan/PG-71729/2021 | EPI_ISL_3876690 | 2021-09-02      |
| hCoV-19/Japan/PG-71730/2021 | EPI_ISL_3876692 | 2021-09-02      |
| hCoV-19/Japan/PG-71731/2021 | EPI_ISL_3876695 | 2021-09-02      |
| hCoV-19/Japan/PG-71732/2021 | EPI_ISL_3876697 | 2021-09-02      |
| hCoV-19/Japan/PG-71733/2021 | EPI_ISL_3876700 | 2021-09-02      |
| hCoV-19/Japan/PG-71734/2021 | EPI_ISL_3876702 | 2021-09-02      |
| hCoV-19/Japan/PG-71735/2021 | EPI_ISL_3876705 | 2021-09-02      |
| hCoV-19/Japan/PG-71736/2021 | EPI_ISL_3876708 | 2021-09-02      |
| hCoV-19/Japan/PG-71737/2021 | EPI_ISL_3876711 | 2021-09-02      |
| hCoV-19/Japan/PG-71738/2021 | EPI_ISL_3876714 | 2021-09-02      |
| hCoV-19/Japan/PG-71739/2021 | EPI_ISL_3876716 | 2021-09-02      |
| hCoV-19/Japan/PG-71740/2021 | EPI_ISL_3876718 | 2021-09-02      |
| hCoV-19/Japan/PG-71741/2021 | EPI_ISL_3876721 | 2021-09-02      |
| hCoV-19/Japan/PG-71742/2021 | EPI_ISL_3876724 | 2021-09-02      |
| hCoV-19/Japan/PG-71743/2021 | EPI_ISL_3876726 | 2021-09-02      |
| hCoV-19/Japan/PG-71744/2021 | EPI_ISL_3876728 | 2021-09-02      |
| hCoV-19/Japan/PG-71745/2021 | EPI_ISL_3876731 | 2021-09-02      |
| hCoV-19/Japan/PG-71746/2021 | EPI_ISL_3876733 | 2021-09-02      |
| hCoV-19/Japan/PG-71747/2021 | EPI_ISL_3876735 | 2021-09-02      |



| virus_name                  | epiID           | submission_date |
|-----------------------------|-----------------|-----------------|
| hCoV-19/Japan/PG-71748/2021 | EPI_ISL_3876738 | 2021-09-02      |
| hCoV-19/Japan/PG-71749/2021 | EPI_ISL_3876741 | 2021-09-02      |
| hCoV-19/Japan/PG-71750/2021 | EPI_ISL_3876744 | 2021-09-02      |
| hCoV-19/Japan/PG-71751/2021 | EPI_ISL_3876745 | 2021-09-02      |
| hCoV-19/Japan/PG-71752/2021 | EPI_ISL_3876747 | 2021-09-02      |
| hCoV-19/Japan/PG-71753/2021 | EPI_ISL_3876748 | 2021-09-02      |
| hCoV-19/Japan/PG-71754/2021 | EPI_ISL_3876751 | 2021-09-02      |
| hCoV-19/Japan/PG-71755/2021 | EPI_ISL_3876753 | 2021-09-02      |
| hCoV-19/Japan/PG-71756/2021 | EPI_ISL_3876754 | 2021-09-02      |
| hCoV-19/Japan/PG-71757/2021 | EPI_ISL_3876757 | 2021-09-02      |
| hCoV-19/Japan/PG-71758/2021 | EPI_ISL_3876759 | 2021-09-02      |
| hCoV-19/Japan/PG-71759/2021 | EPI_ISL_3876761 | 2021-09-02      |
| hCoV-19/Japan/PG-71760/2021 | EPI_ISL_3876764 | 2021-09-02      |
| hCoV-19/Japan/PG-71761/2021 | EPI_ISL_3876766 | 2021-09-02      |
| hCoV-19/Japan/PG-71762/2021 | EPI_ISL_3876769 | 2021-09-02      |
| hCoV-19/Japan/PG-71763/2021 | EPI_ISL_3876771 | 2021-09-02      |
| hCoV-19/Japan/PG-71764/2021 | EPI_ISL_3876772 | 2021-09-02      |
| hCoV-19/Japan/PG-71765/2021 | EPI_ISL_3876774 | 2021-09-02      |
| hCoV-19/Japan/PG-71766/2021 | EPI_ISL_3876776 | 2021-09-02      |
| hCoV-19/Japan/PG-71767/2021 | EPI_ISL_3876778 | 2021-09-02      |
| hCoV-19/Japan/PG-71768/2021 | EPI_ISL_3876780 | 2021-09-02      |
| hCoV-19/Japan/PG-71769/2021 | EPI_ISL_3876782 | 2021-09-02      |
| hCoV-19/Japan/PG-71770/2021 | EPI_ISL_3876784 | 2021-09-02      |
| hCoV-19/Japan/PG-71771/2021 | EPI_ISL_3876786 | 2021-09-02      |
| hCoV-19/Japan/PG-71772/2021 | EPI_ISL_3876787 | 2021-09-02      |
| hCoV-19/Japan/PG-71773/2021 | EPI_ISL_3876789 | 2021-09-02      |
| hCoV-19/Japan/PG-71774/2021 | EPI_ISL_3876791 | 2021-09-02      |
| hCoV-19/Japan/PG-71775/2021 | EPI_ISL_3876794 | 2021-09-02      |
| hCoV-19/Japan/PG-71776/2021 | EPI_ISL_3876797 | 2021-09-02      |
| hCoV-19/Japan/PG-71777/2021 | EPI_ISL_3876799 | 2021-09-02      |
| hCoV-19/Japan/PG-71778/2021 | EPI_ISL_3876802 | 2021-09-02      |
| hCoV-19/Japan/PG-71779/2021 | EPI_ISL_3876803 | 2021-09-02      |
| hCoV-19/Japan/PG-71780/2021 | EPI_ISL_3876804 | 2021-09-02      |
| hCoV-19/Japan/PG-71781/2021 | EPI_ISL_3876805 | 2021-09-02      |
| hCoV-19/Japan/PG-71782/2021 | EPI_ISL_3876808 | 2021-09-02      |
| hCoV-19/Japan/PG-71783/2021 | EPI_ISL_3876811 | 2021-09-02      |
| hCoV-19/Japan/PG-71784/2021 | EPI_ISL_3876813 | 2021-09-02      |
| hCoV-19/Japan/PG-71785/2021 | EPI_ISL_3876816 | 2021-09-02      |
| hCoV-19/Japan/PG-71786/2021 | EPI_ISL_3876818 | 2021-09-02      |
| hCoV-19/Japan/PG-71787/2021 | EPI_ISL_3876820 | 2021-09-02      |
| hCoV-19/Japan/PG-71788/2021 | EPI_ISL_3876823 | 2021-09-02      |
| hCoV-19/Japan/PG-71789/2021 | EPI_ISL_3876826 | 2021-09-02      |
| hCoV-19/Japan/PG-71790/2021 | EPI_ISL_3876827 | 2021-09-02      |
| hCoV-19/Japan/PG-71791/2021 | EPI_ISL_3876828 | 2021-09-02      |
| hCoV-19/Japan/PG-71792/2021 | EPI_ISL_3876831 | 2021-09-02      |
| hCoV-19/Japan/PG-71793/2021 | EPI_ISL_3876833 | 2021-09-02      |
| hCoV-19/Japan/PG-71794/2021 | EPI_ISL_3876835 | 2021-09-02      |
| hCoV-19/Japan/PG-71795/2021 | EPI_ISL_3876837 | 2021-09-02      |
| hCoV-19/Japan/PG-71796/2021 | EPI_ISL_3876838 | 2021-09-02      |
| hCoV-19/Japan/PG-71797/2021 | EPI_ISL_3876839 | 2021-09-02      |
| hCoV-19/Japan/PG-71798/2021 | EPI_ISL_3876840 | 2021-09-02      |
| hCoV-19/Japan/PG-71799/2021 | EPI_ISL_3876841 | 2021-09-02      |
| hCoV-19/Japan/PG-71800/2021 | EPI_ISL_3876842 | 2021-09-02      |
| hCoV-19/Japan/PG-71807/2021 | EPI_ISL_3876845 | 2021-09-02      |

| virus_name                  | epiID           | submission_date |
|-----------------------------|-----------------|-----------------|
| hCoV-19/Japan/PG-71808/2021 | EPI_ISL_3876847 | 2021-09-02      |
| hCoV-19/Japan/PG-71809/2021 | EPI_ISL_3876850 | 2021-09-02      |
| hCoV-19/Japan/PG-71810/2021 | EPI_ISL_3876853 | 2021-09-02      |
| hCoV-19/Japan/PG-71811/2021 | EPI_ISL_3876856 | 2021-09-02      |
| hCoV-19/Japan/PG-71812/2021 | EPI_ISL_3876858 | 2021-09-02      |
| hCoV-19/Japan/PG-71813/2021 | EPI_ISL_3876860 | 2021-09-02      |
| hCoV-19/Japan/PG-71814/2021 | EPI_ISL_3876862 | 2021-09-02      |
| hCoV-19/Japan/PG-71821/2021 | EPI_ISL_3876864 | 2021-09-02      |
| hCoV-19/Japan/PG-71822/2021 | EPI_ISL_3876867 | 2021-09-02      |
| hCoV-19/Japan/PG-71823/2021 | EPI_ISL_3876869 | 2021-09-02      |
| hCoV-19/Japan/PG-71824/2021 | EPI_ISL_3876872 | 2021-09-02      |
| hCoV-19/Japan/PG-71825/2021 | EPI_ISL_3876874 | 2021-09-02      |
| hCoV-19/Japan/PG-71826/2021 | EPI_ISL_3876876 | 2021-09-02      |
| hCoV-19/Japan/PG-71827/2021 | EPI_ISL_3876879 | 2021-09-02      |
| hCoV-19/Japan/PG-71828/2021 | EPI_ISL_3876881 | 2021-09-02      |
| hCoV-19/Japan/PG-71829/2021 | EPI_ISL_3876883 | 2021-09-02      |
| hCoV-19/Japan/PG-71830/2021 | EPI_ISL_3876885 | 2021-09-02      |
| hCoV-19/Japan/PG-71831/2021 | EPI_ISL_3876886 | 2021-09-02      |
| hCoV-19/Japan/PG-71832/2021 | EPI_ISL_3876889 | 2021-09-02      |
| hCoV-19/Japan/PG-71833/2021 | EPI_ISL_3876892 | 2021-09-02      |
| hCoV-19/Japan/PG-71837/2021 | EPI_ISL_3876893 | 2021-09-02      |
| hCoV-19/Japan/PG-71838/2021 | EPI_ISL_3876896 | 2021-09-02      |
| hCoV-19/Japan/PG-71839/2021 | EPI_ISL_3876899 | 2021-09-02      |
| hCoV-19/Japan/PG-71840/2021 | EPI_ISL_3876903 | 2021-09-02      |
| hCoV-19/Japan/PG-71841/2021 | EPI_ISL_3876906 | 2021-09-02      |
| hCoV-19/Japan/PG-71842/2021 | EPI_ISL_3876909 | 2021-09-02      |
| hCoV-19/Japan/PG-71843/2021 | EPI_ISL_3876911 | 2021-09-02      |
| hCoV-19/Japan/PG-71845/2021 | EPI_ISL_3876914 | 2021-09-02      |
| hCoV-19/Japan/PG-71846/2021 | EPI_ISL_3876917 | 2021-09-02      |
| hCoV-19/Japan/PG-71848/2021 | EPI_ISL_3876919 | 2021-09-02      |
| hCoV-19/Japan/PG-71849/2021 | EPI_ISL_3876921 | 2021-09-02      |
| hCoV-19/Japan/PG-71850/2021 | EPI_ISL_3876924 | 2021-09-02      |
| hCoV-19/Japan/PG-71851/2021 | EPI_ISL_3876927 | 2021-09-02      |
| hCoV-19/Japan/PG-71852/2021 | EPI_ISL_3876929 | 2021-09-02      |
| hCoV-19/Japan/PG-71853/2021 | EPI_ISL_3876931 | 2021-09-02      |
| hCoV-19/Japan/PG-71854/2021 | EPI_ISL_3876934 | 2021-09-02      |
| hCoV-19/Japan/PG-71855/2021 | EPI_ISL_3876936 | 2021-09-02      |
| hCoV-19/Japan/PG-71856/2021 | EPI_ISL_3876939 | 2021-09-02      |
| hCoV-19/Japan/PG-71857/2021 | EPI_ISL_3876941 | 2021-09-02      |
| hCoV-19/Japan/PG-71858/2021 | EPI_ISL_3876943 | 2021-09-02      |
| hCoV-19/Japan/PG-71859/2021 | EPI_ISL_3876944 | 2021-09-02      |
| hCoV-19/Japan/PG-71860/2021 | EPI_ISL_3876945 | 2021-09-02      |
| hCoV-19/Japan/PG-71861/2021 | EPI_ISL_3876946 | 2021-09-02      |
| hCoV-19/Japan/PG-71862/2021 | EPI_ISL_3876947 | 2021-09-02      |
| hCoV-19/Japan/PG-71863/2021 | EPI_ISL_3876948 | 2021-09-02      |
| hCoV-19/Japan/PG-71864/2021 | EPI_ISL_3876950 | 2021-09-02      |
| hCoV-19/Japan/PG-71865/2021 | EPI_ISL_3876952 | 2021-09-02      |
| hCoV-19/Japan/PG-71866/2021 | EPI_ISL_3876954 | 2021-09-02      |
| hCoV-19/Japan/PG-71867/2021 | EPI_ISL_3876956 | 2021-09-02      |
| hCoV-19/Japan/PG-71868/2021 | EPI_ISL_3876958 | 2021-09-02      |
| hCoV-19/Japan/PG-71869/2021 | EPI_ISL_3876961 | 2021-09-02      |
| hCoV-19/Japan/PG-71870/2021 | EPI_ISL_3876963 | 2021-09-02      |
| hCoV-19/Japan/PG-71871/2021 | EPI_ISL_3876965 | 2021-09-02      |
| hCoV-19/Japan/PG-71872/2021 | EPI_ISL_3876967 | 2021-09-02      |

| virus_name                  | epiID           | submission_date |
|-----------------------------|-----------------|-----------------|
| hCoV-19/Japan/PG-71873/2021 | EPI_ISL_3876969 | 2021-09-02      |
| hCoV-19/Japan/PG-71874/2021 | EPI_ISL_3876971 | 2021-09-02      |
| hCoV-19/Japan/PG-71875/2021 | EPI_ISL_3876973 | 2021-09-02      |
| hCoV-19/Japan/PG-71876/2021 | EPI_ISL_3876976 | 2021-09-02      |
| hCoV-19/Japan/PG-71877/2021 | EPI_ISL_3876977 | 2021-09-02      |
| hCoV-19/Japan/PG-71878/2021 | EPI_ISL_3876979 | 2021-09-02      |
| hCoV-19/Japan/PG-71879/2021 | EPI_ISL_3876981 | 2021-09-02      |
| hCoV-19/Japan/PG-71880/2021 | EPI_ISL_3876983 | 2021-09-02      |
| hCoV-19/Japan/PG-71881/2021 | EPI_ISL_3876984 | 2021-09-02      |
| hCoV-19/Japan/PG-71882/2021 | EPI_ISL_3876987 | 2021-09-02      |
| hCoV-19/Japan/PG-71883/2021 | EPI_ISL_3876989 | 2021-09-02      |
| hCoV-19/Japan/PG-71884/2021 | EPI_ISL_3876990 | 2021-09-02      |
| hCoV-19/Japan/PG-71885/2021 | EPI_ISL_3876992 | 2021-09-02      |
| hCoV-19/Japan/PG-71886/2021 | EPI_ISL_3876995 | 2021-09-02      |
| hCoV-19/Japan/PG-71887/2021 | EPI_ISL_3876998 | 2021-09-02      |
| hCoV-19/Japan/PG-71888/2021 | EPI_ISL_3877000 | 2021-09-02      |
| hCoV-19/Japan/PG-71889/2021 | EPI_ISL_3877002 | 2021-09-02      |
| hCoV-19/Japan/PG-71890/2021 | EPI_ISL_3877005 | 2021-09-02      |
| hCoV-19/Japan/PG-71891/2021 | EPI_ISL_3877008 | 2021-09-02      |
| hCoV-19/Japan/PG-71892/2021 | EPI_ISL_3877010 | 2021-09-02      |
| hCoV-19/Japan/PG-71893/2021 | EPI_ISL_3877012 | 2021-09-02      |
| hCoV-19/Japan/PG-71894/2021 | EPI_ISL_3877014 | 2021-09-02      |
| hCoV-19/Japan/PG-71895/2021 | EPI_ISL_3877016 | 2021-09-02      |
| hCoV-19/Japan/PG-71896/2021 | EPI_ISL_3877018 | 2021-09-02      |
| hCoV-19/Japan/PG-71897/2021 | EPI_ISL_3877020 | 2021-09-02      |
| hCoV-19/Japan/PG-71898/2021 | EPI_ISL_3877023 | 2021-09-02      |
| hCoV-19/Japan/PG-71899/2021 | EPI_ISL_3877025 | 2021-09-02      |
| hCoV-19/Japan/PG-71953/2021 | EPI_ISL_3870487 | 2021-09-02      |
| hCoV-19/Japan/PG-71954/2021 | EPI_ISL_3870488 | 2021-09-02      |
| hCoV-19/Japan/PG-71955/2021 | EPI_ISL_3870489 | 2021-09-02      |
| hCoV-19/Japan/PG-71956/2021 | EPI_ISL_3870490 | 2021-09-02      |
| hCoV-19/Japan/PG-71957/2021 | EPI_ISL_3870491 | 2021-09-02      |
| hCoV-19/Japan/PG-71958/2021 | EPI_ISL_3870492 | 2021-09-02      |
| hCoV-19/Japan/PG-71959/2021 | EPI_ISL_3870493 | 2021-09-02      |
| hCoV-19/Japan/PG-71960/2021 | EPI_ISL_3870494 | 2021-09-02      |
| hCoV-19/Japan/PG-71961/2021 | EPI_ISL_3870495 | 2021-09-02      |
| hCoV-19/Japan/PG-71962/2021 | EPI_ISL_3870496 | 2021-09-02      |
| hCoV-19/Japan/PG-71963/2021 | EPI_ISL_3870497 | 2021-09-02      |
| hCoV-19/Japan/PG-71964/2021 | EPI_ISL_3870498 | 2021-09-02      |
| hCoV-19/Japan/PG-71965/2021 | EPI_ISL_3870499 | 2021-09-02      |
| hCoV-19/Japan/PG-71966/2021 | EPI_ISL_3870500 | 2021-09-02      |
| hCoV-19/Japan/PG-71967/2021 | EPI_ISL_3870501 | 2021-09-02      |
| hCoV-19/Japan/PG-71968/2021 | EPI_ISL_3870502 | 2021-09-02      |
| hCoV-19/Japan/PG-71969/2021 | EPI_ISL_3874770 | 2021-09-02      |
| hCoV-19/Japan/PG-71970/2021 | EPI_ISL_3874771 | 2021-09-02      |
| hCoV-19/Japan/PG-71971/2021 | EPI_ISL_3874772 | 2021-09-02      |
| hCoV-19/Japan/PG-71972/2021 | EPI_ISL_3874773 | 2021-09-02      |
| hCoV-19/Japan/PG-71973/2021 | EPI_ISL_3874774 | 2021-09-02      |
| hCoV-19/Japan/PG-71975/2021 | EPI_ISL_3874775 | 2021-09-02      |
| hCoV-19/Japan/PG-72066/2021 | EPI_ISL_3874776 | 2021-09-02      |
| hCoV-19/Japan/PG-72067/2021 | EPI_ISL_3874777 | 2021-09-02      |
| hCoV-19/Japan/PG-72068/2021 | EPI_ISL_3874778 | 2021-09-02      |
| hCoV-19/Japan/PG-72069/2021 | EPI_ISL_3874779 | 2021-09-02      |
| hCoV-19/Japan/PG-72070/2021 | EPI_ISL_3874780 | 2021-09-02      |

| virus_name                  | epiID           | submission_date |
|-----------------------------|-----------------|-----------------|
| hCoV-19/Japan/PG-72071/2021 | EPI_ISL_3874781 | 2021-09-02      |
| hCoV-19/Japan/PG-72072/2021 | EPI_ISL_3874782 | 2021-09-02      |
| hCoV-19/Japan/PG-72073/2021 | EPI_ISL_3874783 | 2021-09-02      |
| hCoV-19/Japan/PG-72074/2021 | EPI_ISL_3874784 | 2021-09-02      |
| hCoV-19/Japan/PG-72075/2021 | EPI_ISL_3874785 | 2021-09-02      |
| hCoV-19/Japan/PG-72076/2021 | EPI_ISL_3876007 | 2021-09-02      |
| hCoV-19/Japan/PG-72077/2021 | EPI_ISL_3876008 | 2021-09-02      |
| hCoV-19/Japan/PG-72078/2021 | EPI_ISL_3876009 | 2021-09-02      |
| hCoV-19/Japan/PG-72079/2021 | EPI_ISL_3876010 | 2021-09-02      |
| hCoV-19/Japan/PG-72080/2021 | EPI_ISL_3876011 | 2021-09-02      |
| hCoV-19/Japan/PG-72081/2021 | EPI_ISL_3876012 | 2021-09-02      |
| hCoV-19/Japan/PG-72082/2021 | EPI_ISL_3876013 | 2021-09-02      |
| hCoV-19/Japan/PG-72088/2021 | EPI_ISL_3876014 | 2021-09-02      |
| hCoV-19/Japan/PG-72089/2021 | EPI_ISL_3876015 | 2021-09-02      |
| hCoV-19/Japan/PG-72090/2021 | EPI_ISL_3876016 | 2021-09-02      |
| hCoV-19/Japan/PG-72091/2021 | EPI_ISL_3876017 | 2021-09-02      |
| hCoV-19/Japan/PG-72092/2021 | EPI_ISL_3876018 | 2021-09-02      |
| hCoV-19/Japan/PG-72093/2021 | EPI_ISL_3876019 | 2021-09-02      |
| hCoV-19/Japan/PG-72094/2021 | EPI_ISL_3876020 | 2021-09-02      |
| hCoV-19/Japan/PG-72095/2021 | EPI_ISL_3876021 | 2021-09-02      |
| hCoV-19/Japan/PG-72109/2021 | EPI_ISL_3871564 | 2021-09-02      |
| hCoV-19/Japan/PG-72110/2021 | EPI_ISL_3871565 | 2021-09-02      |
| hCoV-19/Japan/PG-72111/2021 | EPI_ISL_3871566 | 2021-09-02      |
| hCoV-19/Japan/PG-72112/2021 | EPI_ISL_3871567 | 2021-09-02      |
| hCoV-19/Japan/PG-72113/2021 | EPI_ISL_3871568 | 2021-09-02      |
| hCoV-19/Japan/PG-72114/2021 | EPI_ISL_3871569 | 2021-09-02      |
| hCoV-19/Japan/PG-72115/2021 | EPI_ISL_3871570 | 2021-09-02      |
| hCoV-19/Japan/PG-72116/2021 | EPI_ISL_3871571 | 2021-09-02      |
| hCoV-19/Japan/PG-72117/2021 | EPI_ISL_3871572 | 2021-09-02      |
| hCoV-19/Japan/PG-72118/2021 | EPI_ISL_3871573 | 2021-09-02      |
| hCoV-19/Japan/PG-72119/2021 | EPI_ISL_3871469 | 2021-09-02      |
| hCoV-19/Japan/PG-72120/2021 | EPI_ISL_3871470 | 2021-09-02      |
| hCoV-19/Japan/PG-72121/2021 | EPI_ISL_3871471 | 2021-09-02      |
| hCoV-19/Japan/PG-72122/2021 | EPI_ISL_3871472 | 2021-09-02      |
| hCoV-19/Japan/PG-72123/2021 | EPI_ISL_3871473 | 2021-09-02      |
| hCoV-19/Japan/PG-72124/2021 | EPI_ISL_3871474 | 2021-09-02      |
| hCoV-19/Japan/PG-72125/2021 | EPI_ISL_3871475 | 2021-09-02      |
| hCoV-19/Japan/PG-72126/2021 | EPI_ISL_3871476 | 2021-09-02      |
| hCoV-19/Japan/PG-72127/2021 | EPI_ISL_3871477 | 2021-09-02      |
| hCoV-19/Japan/PG-72128/2021 | EPI_ISL_3871478 | 2021-09-02      |
| hCoV-19/Japan/PG-72129/2021 | EPI_ISL_3871479 | 2021-09-02      |
| hCoV-19/Japan/PG-72130/2021 | EPI_ISL_3871480 | 2021-09-02      |
| hCoV-19/Japan/PG-72131/2021 | EPI_ISL_3871481 | 2021-09-02      |
| hCoV-19/Japan/PG-72132/2021 | EPI_ISL_3871482 | 2021-09-02      |
| hCoV-19/Japan/PG-72133/2021 | EPI_ISL_3871483 | 2021-09-02      |
| hCoV-19/Japan/PG-72134/2021 | EPI_ISL_3871484 | 2021-09-02      |
| hCoV-19/Japan/PG-72135/2021 | EPI_ISL_3871485 | 2021-09-02      |
| hCoV-19/Japan/PG-72136/2021 | EPI_ISL_3871486 | 2021-09-02      |
| hCoV-19/Japan/PG-72137/2021 | EPI_ISL_3871487 | 2021-09-02      |
| hCoV-19/Japan/PG-72138/2021 | EPI_ISL_3871488 | 2021-09-02      |
| hCoV-19/Japan/PG-72139/2021 | EPI_ISL_3871489 | 2021-09-02      |
| hCoV-19/Japan/PG-72140/2021 | EPI_ISL_3871490 | 2021-09-02      |
| hCoV-19/Japan/PG-72143/2021 | EPI_ISL_3871443 | 2021-09-02      |
| hCoV-19/Japan/PG-72144/2021 | EPI_ISL_3871190 | 2021-09-02      |

| virus_name                  | epiID           | submission_date |
|-----------------------------|-----------------|-----------------|
| hCoV-19/Japan/PG-72145/2021 | EPI_ISL_3871191 | 2021-09-02      |
| hCoV-19/Japan/PG-72146/2021 | EPI_ISL_3871192 | 2021-09-02      |
| hCoV-19/Japan/PG-72147/2021 | EPI_ISL_3871193 | 2021-09-02      |
| hCoV-19/Japan/PG-72148/2021 | EPI_ISL_3871194 | 2021-09-02      |
| hCoV-19/Japan/PG-72149/2021 | EPI_ISL_3871195 | 2021-09-02      |
| hCoV-19/Japan/PG-72150/2021 | EPI_ISL_3871196 | 2021-09-02      |
| hCoV-19/Japan/PG-72151/2021 | EPI_ISL_3871197 | 2021-09-02      |
| hCoV-19/Japan/PG-72152/2021 | EPI_ISL_3871198 | 2021-09-02      |
| hCoV-19/Japan/PG-72153/2021 | EPI_ISL_3871199 | 2021-09-02      |
| hCoV-19/Japan/PG-72154/2021 | EPI_ISL_3871200 | 2021-09-02      |
| hCoV-19/Japan/PG-72155/2021 | EPI_ISL_3871201 | 2021-09-02      |
| hCoV-19/Japan/PG-72156/2021 | EPI_ISL_3871202 | 2021-09-02      |
| hCoV-19/Japan/PG-72157/2021 | EPI_ISL_3871203 | 2021-09-02      |
| hCoV-19/Japan/PG-72158/2021 | EPI_ISL_3871204 | 2021-09-02      |
| hCoV-19/Japan/PG-72159/2021 | EPI_ISL_3871205 | 2021-09-02      |
| hCoV-19/Japan/PG-72160/2021 | EPI_ISL_3871206 | 2021-09-02      |
| hCoV-19/Japan/PG-72161/2021 | EPI_ISL_3871207 | 2021-09-02      |
| hCoV-19/Japan/PG-72162/2021 | EPI_ISL_3871208 | 2021-09-02      |
| hCoV-19/Japan/PG-72163/2021 | EPI_ISL_3871209 | 2021-09-02      |
| hCoV-19/Japan/PG-72164/2021 | EPI_ISL_3871210 | 2021-09-02      |
| hCoV-19/Japan/PG-72165/2021 | EPI_ISL_3871211 | 2021-09-02      |
| hCoV-19/Japan/PG-72166/2021 | EPI_ISL_3871981 | 2021-09-02      |
| hCoV-19/Japan/PG-72167/2021 | EPI_ISL_3871982 | 2021-09-02      |
| hCoV-19/Japan/PG-72168/2021 | EPI_ISL_3871983 | 2021-09-02      |
| hCoV-19/Japan/PG-72169/2021 | EPI_ISL_3871984 | 2021-09-02      |
| hCoV-19/Japan/PG-72170/2021 | EPI_ISL_3871985 | 2021-09-02      |
| hCoV-19/Japan/PG-72171/2021 | EPI_ISL_3871986 | 2021-09-02      |
| hCoV-19/Japan/PG-72172/2021 | EPI_ISL_3871987 | 2021-09-02      |
| hCoV-19/Japan/PG-72173/2021 | EPI_ISL_3871988 | 2021-09-02      |
| hCoV-19/Japan/PG-72174/2021 | EPI_ISL_3871989 | 2021-09-02      |
| hCoV-19/Japan/PG-72175/2021 | EPI_ISL_3871990 | 2021-09-02      |
| hCoV-19/Japan/PG-72176/2021 | EPI_ISL_3871991 | 2021-09-02      |
| hCoV-19/Japan/PG-72177/2021 | EPI_ISL_3871992 | 2021-09-02      |
| hCoV-19/Japan/PG-72178/2021 | EPI_ISL_3871993 | 2021-09-02      |
| hCoV-19/Japan/PG-72179/2021 | EPI_ISL_3871994 | 2021-09-02      |
| hCoV-19/Japan/PG-72180/2021 | EPI_ISL_3871995 | 2021-09-02      |
| hCoV-19/Japan/PG-72181/2021 | EPI_ISL_3871996 | 2021-09-02      |
| hCoV-19/Japan/PG-72182/2021 | EPI_ISL_3874147 | 2021-09-02      |
| hCoV-19/Japan/PG-72183/2021 | EPI_ISL_3874148 | 2021-09-02      |
| hCoV-19/Japan/PG-72184/2021 | EPI_ISL_3874149 | 2021-09-02      |
| hCoV-19/Japan/PG-72185/2021 | EPI_ISL_3874150 | 2021-09-02      |
| hCoV-19/Japan/PG-72186/2021 | EPI_ISL_3874151 | 2021-09-02      |
| hCoV-19/Japan/PG-72187/2021 | EPI_ISL_3874152 | 2021-09-02      |
| hCoV-19/Japan/PG-72188/2021 | EPI_ISL_3874153 | 2021-09-02      |
| hCoV-19/Japan/PG-72189/2021 | EPI_ISL_3874154 | 2021-09-02      |
| hCoV-19/Japan/PG-72190/2021 | EPI_ISL_3874155 | 2021-09-02      |
| hCoV-19/Japan/PG-72191/2021 | EPI_ISL_3874156 | 2021-09-02      |
| hCoV-19/Japan/PG-72192/2021 | EPI_ISL_3874157 | 2021-09-02      |
| hCoV-19/Japan/PG-72193/2021 | EPI_ISL_3874158 | 2021-09-02      |
| hCoV-19/Japan/PG-72194/2021 | EPI_ISL_3874159 | 2021-09-02      |
| hCoV-19/Japan/PG-72195/2021 | EPI_ISL_3874160 | 2021-09-02      |
| hCoV-19/Japan/PG-72196/2021 | EPI_ISL_3874161 | 2021-09-02      |
| hCoV-19/Japan/PG-72197/2021 | EPI_ISL_3874162 | 2021-09-02      |
| hCoV-19/Japan/PG-72198/2021 | EPI_ISL_3874163 | 2021-09-02      |

| virus_name                  | epiID           | submission_date |
|-----------------------------|-----------------|-----------------|
| hCoV-19/Japan/PG-72199/2021 | EPI_ISL_3874164 | 2021-09-02      |
| hCoV-19/Japan/PG-72200/2021 | EPI_ISL_3874165 | 2021-09-02      |
| hCoV-19/Japan/PG-72201/2021 | EPI_ISL_3874166 | 2021-09-02      |
| hCoV-19/Japan/PG-72202/2021 | EPI_ISL_3877027 | 2021-09-02      |
| hCoV-19/Japan/PG-72203/2021 | EPI_ISL_3877028 | 2021-09-02      |
| hCoV-19/Japan/PG-72204/2021 | EPI_ISL_3877031 | 2021-09-02      |
| hCoV-19/Japan/PG-72205/2021 | EPI_ISL_3877034 | 2021-09-02      |
| hCoV-19/Japan/PG-72206/2021 | EPI_ISL_3877036 | 2021-09-02      |
| hCoV-19/Japan/PG-72207/2021 | EPI_ISL_3877039 | 2021-09-02      |
| hCoV-19/Japan/PG-72208/2021 | EPI_ISL_3877042 | 2021-09-02      |
| hCoV-19/Japan/PG-72209/2021 | EPI_ISL_3877043 | 2021-09-02      |
| hCoV-19/Japan/PG-72210/2021 | EPI_ISL_3877046 | 2021-09-02      |
| hCoV-19/Japan/PG-72211/2021 | EPI_ISL_3877048 | 2021-09-02      |
| hCoV-19/Japan/PG-72212/2021 | EPI_ISL_3877051 | 2021-09-02      |
| hCoV-19/Japan/PG-72213/2021 | EPI_ISL_3877054 | 2021-09-02      |
| hCoV-19/Japan/PG-72214/2021 | EPI_ISL_3877056 | 2021-09-02      |
| hCoV-19/Japan/PG-72215/2021 | EPI_ISL_3877058 | 2021-09-02      |
| hCoV-19/Japan/PG-72216/2021 | EPI_ISL_3877060 | 2021-09-02      |
| hCoV-19/Japan/PG-72217/2021 | EPI_ISL_3877063 | 2021-09-02      |
| hCoV-19/Japan/PG-72218/2021 | EPI_ISL_3877066 | 2021-09-02      |
| hCoV-19/Japan/PG-72219/2021 | EPI_ISL_3877068 | 2021-09-02      |
| hCoV-19/Japan/PG-72220/2021 | EPI_ISL_3877070 | 2021-09-02      |
| hCoV-19/Japan/PG-72221/2021 | EPI_ISL_3877072 | 2021-09-02      |
| hCoV-19/Japan/PG-72222/2021 | EPI_ISL_3877074 | 2021-09-02      |
| hCoV-19/Japan/PG-72223/2021 | EPI_ISL_3877076 | 2021-09-02      |
| hCoV-19/Japan/PG-72224/2021 | EPI_ISL_3877078 | 2021-09-02      |
| hCoV-19/Japan/PG-72225/2021 | EPI_ISL_3877080 | 2021-09-02      |
| hCoV-19/Japan/PG-72226/2021 | EPI_ISL_3877083 | 2021-09-02      |
| hCoV-19/Japan/PG-72227/2021 | EPI_ISL_3877085 | 2021-09-02      |
| hCoV-19/Japan/PG-72228/2021 | EPI_ISL_3877087 | 2021-09-02      |
| hCoV-19/Japan/PG-72229/2021 | EPI_ISL_3877095 | 2021-09-02      |
| hCoV-19/Japan/PG-72230/2021 | EPI_ISL_3877097 | 2021-09-02      |
| hCoV-19/Japan/PG-72231/2021 | EPI_ISL_3877099 | 2021-09-02      |
| hCoV-19/Japan/PG-72232/2021 | EPI_ISL_3877102 | 2021-09-02      |
| hCoV-19/Japan/PG-72233/2021 | EPI_ISL_3877105 | 2021-09-02      |
| hCoV-19/Japan/PG-72234/2021 | EPI_ISL_3877107 | 2021-09-02      |
| hCoV-19/Japan/PG-72235/2021 | EPI_ISL_3877110 | 2021-09-02      |
| hCoV-19/Japan/PG-72236/2021 | EPI_ISL_3877111 | 2021-09-02      |
| hCoV-19/Japan/PG-72237/2021 | EPI_ISL_3877112 | 2021-09-02      |
| hCoV-19/Japan/PG-72238/2021 | EPI_ISL_3877115 | 2021-09-02      |
| hCoV-19/Japan/PG-72239/2021 | EPI_ISL_3877118 | 2021-09-02      |
| hCoV-19/Japan/PG-72240/2021 | EPI_ISL_3877120 | 2021-09-02      |
| hCoV-19/Japan/PG-72241/2021 | EPI_ISL_3877122 | 2021-09-02      |
| hCoV-19/Japan/PG-72242/2021 | EPI_ISL_3877125 | 2021-09-02      |
| hCoV-19/Japan/PG-72243/2021 | EPI_ISL_3877127 | 2021-09-02      |
| hCoV-19/Japan/PG-72244/2021 | EPI_ISL_3877129 | 2021-09-02      |
| hCoV-19/Japan/PG-72245/2021 | EPI_ISL_3877131 | 2021-09-02      |
| hCoV-19/Japan/PG-72246/2021 | EPI_ISL_3877134 | 2021-09-02      |
| hCoV-19/Japan/PG-72247/2021 | EPI_ISL_3877136 | 2021-09-02      |
| hCoV-19/Japan/PG-72248/2021 | EPI_ISL_3877139 | 2021-09-02      |
| hCoV-19/Japan/PG-72249/2021 | EPI_ISL_3877141 | 2021-09-02      |
| hCoV-19/Japan/PG-72250/2021 | EPI_ISL_3877144 | 2021-09-02      |
| hCoV-19/Japan/PG-72251/2021 | EPI_ISL_3877146 | 2021-09-02      |
| hCoV-19/Japan/PG-72252/2021 | EPI_ISL_3877149 | 2021-09-02      |

| virus_name                  | epiID           | submission_date |
|-----------------------------|-----------------|-----------------|
| hCoV-19/Japan/PG-72253/2021 | EPI_ISL_3877152 | 2021-09-02      |
| hCoV-19/Japan/PG-72254/2021 | EPI_ISL_3877154 | 2021-09-02      |
| hCoV-19/Japan/PG-72255/2021 | EPI_ISL_3877157 | 2021-09-02      |
| hCoV-19/Japan/PG-72256/2021 | EPI_ISL_3877159 | 2021-09-02      |
| hCoV-19/Japan/PG-72257/2021 | EPI_ISL_3877161 | 2021-09-02      |
| hCoV-19/Japan/PG-72258/2021 | EPI_ISL_3877164 | 2021-09-02      |
| hCoV-19/Japan/PG-72259/2021 | EPI_ISL_3877165 | 2021-09-02      |
| hCoV-19/Japan/PG-72260/2021 | EPI_ISL_3877166 | 2021-09-02      |
| hCoV-19/Japan/PG-72261/2021 | EPI_ISL_3877167 | 2021-09-02      |
| hCoV-19/Japan/PG-72262/2021 | EPI_ISL_3877168 | 2021-09-02      |
| hCoV-19/Japan/PG-72263/2021 | EPI_ISL_3877169 | 2021-09-02      |
| hCoV-19/Japan/PG-72264/2021 | EPI_ISL_3877171 | 2021-09-02      |
| hCoV-19/Japan/PG-72265/2021 | EPI_ISL_3877174 | 2021-09-02      |
| hCoV-19/Japan/PG-72266/2021 | EPI_ISL_3877176 | 2021-09-02      |
| hCoV-19/Japan/PG-72267/2021 | EPI_ISL_3877180 | 2021-09-02      |
| hCoV-19/Japan/PG-72268/2021 | EPI_ISL_3877182 | 2021-09-02      |
| hCoV-19/Japan/PG-72269/2021 | EPI_ISL_3877185 | 2021-09-02      |
| hCoV-19/Japan/PG-72270/2021 | EPI_ISL_3877187 | 2021-09-02      |
| hCoV-19/Japan/PG-72271/2021 | EPI_ISL_3877190 | 2021-09-02      |
| hCoV-19/Japan/PG-72272/2021 | EPI_ISL_3877193 | 2021-09-02      |
| hCoV-19/Japan/PG-72273/2021 | EPI_ISL_3877195 | 2021-09-02      |
| hCoV-19/Japan/PG-72274/2021 | EPI_ISL_3877198 | 2021-09-02      |
| hCoV-19/Japan/PG-72275/2021 | EPI_ISL_3877200 | 2021-09-02      |
| hCoV-19/Japan/PG-72276/2021 | EPI_ISL_3877202 | 2021-09-02      |
| hCoV-19/Japan/PG-72277/2021 | EPI_ISL_3877205 | 2021-09-02      |
| hCoV-19/Japan/PG-72278/2021 | EPI_ISL_3877207 | 2021-09-02      |
| hCoV-19/Japan/PG-72279/2021 | EPI_ISL_3877210 | 2021-09-02      |
| hCoV-19/Japan/PG-72280/2021 | EPI_ISL_3877212 | 2021-09-02      |
| hCoV-19/Japan/PG-72281/2021 | EPI_ISL_3877215 | 2021-09-02      |
| hCoV-19/Japan/PG-72282/2021 | EPI_ISL_3877218 | 2021-09-02      |
| hCoV-19/Japan/PG-72283/2021 | EPI_ISL_3877221 | 2021-09-02      |
| hCoV-19/Japan/PG-72284/2021 | EPI_ISL_3877224 | 2021-09-02      |
| hCoV-19/Japan/PG-72285/2021 | EPI_ISL_3877227 | 2021-09-02      |
| hCoV-19/Japan/PG-72286/2021 | EPI_ISL_3877230 | 2021-09-02      |
| hCoV-19/Japan/PG-72287/2021 | EPI_ISL_3877233 | 2021-09-02      |
| hCoV-19/Japan/PG-72288/2021 | EPI_ISL_3877236 | 2021-09-02      |
| hCoV-19/Japan/PG-72289/2021 | EPI_ISL_3877239 | 2021-09-02      |
| hCoV-19/Japan/PG-72290/2021 | EPI_ISL_3877242 | 2021-09-02      |
| hCoV-19/Japan/PG-72291/2021 | EPI_ISL_3877246 | 2021-09-02      |
| hCoV-19/Japan/PG-72292/2021 | EPI_ISL_3877248 | 2021-09-02      |
| hCoV-19/Japan/PG-72293/2021 | EPI_ISL_3877251 | 2021-09-02      |
| hCoV-19/Japan/PG-72294/2021 | EPI_ISL_3877254 | 2021-09-02      |
| hCoV-19/Japan/PG-72295/2021 | EPI_ISL_3877256 | 2021-09-02      |
| hCoV-19/Japan/PG-72296/2021 | EPI_ISL_3877259 | 2021-09-02      |
| hCoV-19/Japan/PG-72297/2021 | EPI_ISL_3877262 | 2021-09-02      |
| hCoV-19/Japan/PG-72298/2021 | EPI_ISL_3877264 | 2021-09-02      |
| hCoV-19/Japan/PG-72299/2021 | EPI_ISL_3877266 | 2021-09-02      |
| hCoV-19/Japan/PG-72300/2021 | EPI_ISL_3877269 | 2021-09-02      |
| hCoV-19/Japan/PG-72301/2021 | EPI_ISL_3877271 | 2021-09-02      |
| hCoV-19/Japan/PG-72302/2021 | EPI_ISL_3877274 | 2021-09-02      |
| hCoV-19/Japan/PG-72303/2021 | EPI_ISL_3877277 | 2021-09-02      |
| hCoV-19/Japan/PG-72304/2021 | EPI_ISL_3877280 | 2021-09-02      |
| hCoV-19/Japan/PG-72305/2021 | EPI_ISL_3877282 | 2021-09-02      |
| hCoV-19/Japan/PG-72306/2021 | EPI_ISL_3877285 | 2021-09-02      |

| virus_name                  | epiID           | submission_date |
|-----------------------------|-----------------|-----------------|
| hCoV-19/Japan/PG-72307/2021 | EPI_ISL_3877288 | 2021-09-02      |
| hCoV-19/Japan/PG-72308/2021 | EPI_ISL_3877290 | 2021-09-02      |
| hCoV-19/Japan/PG-72309/2021 | EPI_ISL_3877293 | 2021-09-02      |
| hCoV-19/Japan/PG-72310/2021 | EPI_ISL_3877295 | 2021-09-02      |
| hCoV-19/Japan/PG-72311/2021 | EPI_ISL_3877298 | 2021-09-02      |
| hCoV-19/Japan/PG-72312/2021 | EPI_ISL_3877300 | 2021-09-02      |
| hCoV-19/Japan/PG-72313/2021 | EPI_ISL_3877303 | 2021-09-02      |
| hCoV-19/Japan/PG-72314/2021 | EPI_ISL_3877306 | 2021-09-02      |
| hCoV-19/Japan/PG-72315/2021 | EPI_ISL_3877308 | 2021-09-02      |
| hCoV-19/Japan/PG-72316/2021 | EPI_ISL_3877310 | 2021-09-02      |
| hCoV-19/Japan/PG-72317/2021 | EPI_ISL_3877313 | 2021-09-02      |
| hCoV-19/Japan/PG-72318/2021 | EPI_ISL_3877316 | 2021-09-02      |
| hCoV-19/Japan/PG-72319/2021 | EPI_ISL_3877319 | 2021-09-02      |
| hCoV-19/Japan/PG-72320/2021 | EPI_ISL_3877322 | 2021-09-02      |
| hCoV-19/Japan/PG-72321/2021 | EPI_ISL_3877324 | 2021-09-02      |
| hCoV-19/Japan/PG-72322/2021 | EPI_ISL_3877327 | 2021-09-02      |
| hCoV-19/Japan/PG-72323/2021 | EPI_ISL_3877329 | 2021-09-02      |
| hCoV-19/Japan/PG-72324/2021 | EPI_ISL_3877332 | 2021-09-02      |
| hCoV-19/Japan/PG-72325/2021 | EPI_ISL_3877334 | 2021-09-02      |
| hCoV-19/Japan/PG-72326/2021 | EPI_ISL_3877336 | 2021-09-02      |
| hCoV-19/Japan/PG-72327/2021 | EPI_ISL_3877339 | 2021-09-02      |
| hCoV-19/Japan/PG-72328/2021 | EPI_ISL_3877342 | 2021-09-02      |
| hCoV-19/Japan/PG-72329/2021 | EPI_ISL_3877345 | 2021-09-02      |
| hCoV-19/Japan/PG-72330/2021 | EPI_ISL_3877348 | 2021-09-02      |
| hCoV-19/Japan/PG-72331/2021 | EPI_ISL_3877350 | 2021-09-02      |
| hCoV-19/Japan/PG-72332/2021 | EPI_ISL_3877352 | 2021-09-02      |
| hCoV-19/Japan/PG-72333/2021 | EPI_ISL_3877355 | 2021-09-02      |
| hCoV-19/Japan/PG-72334/2021 | EPI_ISL_3877358 | 2021-09-02      |
| hCoV-19/Japan/PG-72335/2021 | EPI_ISL_3877359 | 2021-09-02      |
| hCoV-19/Japan/PG-72336/2021 | EPI_ISL_3877360 | 2021-09-02      |
| hCoV-19/Japan/PG-72337/2021 | EPI_ISL_3877361 | 2021-09-02      |
| hCoV-19/Japan/PG-72338/2021 | EPI_ISL_3877362 | 2021-09-02      |
| hCoV-19/Japan/PG-72339/2021 | EPI_ISL_3877363 | 2021-09-02      |
| hCoV-19/Japan/PG-72340/2021 | EPI_ISL_3877366 | 2021-09-02      |
| hCoV-19/Japan/PG-72341/2021 | EPI_ISL_3877369 | 2021-09-02      |
| hCoV-19/Japan/PG-72342/2021 | EPI_ISL_3877371 | 2021-09-02      |
| hCoV-19/Japan/PG-72343/2021 | EPI_ISL_3877374 | 2021-09-02      |
| hCoV-19/Japan/PG-72344/2021 | EPI_ISL_3877376 | 2021-09-02      |
| hCoV-19/Japan/PG-72345/2021 | EPI_ISL_3877378 | 2021-09-02      |
| hCoV-19/Japan/PG-72346/2021 | EPI_ISL_3877381 | 2021-09-02      |
| hCoV-19/Japan/PG-72347/2021 | EPI_ISL_3877384 | 2021-09-02      |
| hCoV-19/Japan/PG-72348/2021 | EPI_ISL_3877387 | 2021-09-02      |
| hCoV-19/Japan/PG-72349/2021 | EPI_ISL_3877390 | 2021-09-02      |
| hCoV-19/Japan/PG-72350/2021 | EPI_ISL_3877393 | 2021-09-02      |
| hCoV-19/Japan/PG-72351/2021 | EPI_ISL_3877395 | 2021-09-02      |
| hCoV-19/Japan/PG-72352/2021 | EPI_ISL_3877398 | 2021-09-02      |
| hCoV-19/Japan/PG-72353/2021 | EPI_ISL_3877401 | 2021-09-02      |
| hCoV-19/Japan/PG-72354/2021 | EPI_ISL_3877403 | 2021-09-02      |
| hCoV-19/Japan/PG-72355/2021 | EPI_ISL_3877406 | 2021-09-02      |
| hCoV-19/Japan/PG-72356/2021 | EPI_ISL_3877409 | 2021-09-02      |
| hCoV-19/Japan/PG-72357/2021 | EPI_ISL_3877410 | 2021-09-02      |
| hCoV-19/Japan/PG-72358/2021 | EPI_ISL_3877411 | 2021-09-02      |
| hCoV-19/Japan/PG-72359/2021 | EPI_ISL_3877412 | 2021-09-02      |
| hCoV-19/Japan/PG-72360/2021 | EPI_ISL_3877413 | 2021-09-02      |



| virus_name                  | epiID           | submission_date |
|-----------------------------|-----------------|-----------------|
| hCoV-19/Japan/PG-72361/2021 | EPI_ISL_3877414 | 2021-09-02      |
| hCoV-19/Japan/PG-72362/2021 | EPI_ISL_3877416 | 2021-09-02      |
| hCoV-19/Japan/PG-72363/2021 | EPI_ISL_3877419 | 2021-09-02      |
| hCoV-19/Japan/PG-72364/2021 | EPI_ISL_3877422 | 2021-09-02      |
| hCoV-19/Japan/PG-72365/2021 | EPI_ISL_3877425 | 2021-09-02      |
| hCoV-19/Japan/PG-72366/2021 | EPI_ISL_3877426 | 2021-09-02      |
| hCoV-19/Japan/PG-72367/2021 | EPI_ISL_3877428 | 2021-09-02      |
| hCoV-19/Japan/PG-72368/2021 | EPI_ISL_3877431 | 2021-09-02      |
| hCoV-19/Japan/PG-72369/2021 | EPI_ISL_3877432 | 2021-09-02      |
| hCoV-19/Japan/PG-72370/2021 | EPI_ISL_3877433 | 2021-09-02      |
| hCoV-19/Japan/PG-72371/2021 | EPI_ISL_3877435 | 2021-09-02      |
| hCoV-19/Japan/PG-72372/2021 | EPI_ISL_3877438 | 2021-09-02      |
| hCoV-19/Japan/PG-72373/2021 | EPI_ISL_3877440 | 2021-09-02      |
| hCoV-19/Japan/PG-72374/2021 | EPI_ISL_3877442 | 2021-09-02      |
| hCoV-19/Japan/PG-72375/2021 | EPI_ISL_3877445 | 2021-09-02      |
| hCoV-19/Japan/PG-72376/2021 | EPI_ISL_3877448 | 2021-09-02      |
| hCoV-19/Japan/PG-72377/2021 | EPI_ISL_3877451 | 2021-09-02      |
| hCoV-19/Japan/PG-72378/2021 | EPI_ISL_3877454 | 2021-09-02      |
| hCoV-19/Japan/PG-72379/2021 | EPI_ISL_3877457 | 2021-09-02      |
| hCoV-19/Japan/PG-72380/2021 | EPI_ISL_3877460 | 2021-09-02      |
| hCoV-19/Japan/PG-72381/2021 | EPI_ISL_3877463 | 2021-09-02      |
| hCoV-19/Japan/PG-72382/2021 | EPI_ISL_3877466 | 2021-09-02      |
| hCoV-19/Japan/PG-72383/2021 | EPI_ISL_3877469 | 2021-09-02      |
| hCoV-19/Japan/PG-72384/2021 | EPI_ISL_3877472 | 2021-09-02      |
| hCoV-19/Japan/PG-72385/2021 | EPI_ISL_3877475 | 2021-09-02      |
| hCoV-19/Japan/PG-72386/2021 | EPI_ISL_3877479 | 2021-09-02      |
| hCoV-19/Japan/PG-72387/2021 | EPI_ISL_3877482 | 2021-09-02      |
| hCoV-19/Japan/PG-72388/2021 | EPI_ISL_3877485 | 2021-09-02      |
| hCoV-19/Japan/PG-72389/2021 | EPI_ISL_3877488 | 2021-09-02      |
| hCoV-19/Japan/PG-72390/2021 | EPI_ISL_3877491 | 2021-09-02      |
| hCoV-19/Japan/PG-72391/2021 | EPI_ISL_3877493 | 2021-09-02      |
| hCoV-19/Japan/PG-72392/2021 | EPI_ISL_3877496 | 2021-09-02      |
| hCoV-19/Japan/PG-72393/2021 | EPI_ISL_3877497 | 2021-09-02      |
| hCoV-19/Japan/PG-72394/2021 | EPI_ISL_3877499 | 2021-09-02      |
| hCoV-19/Japan/PG-72395/2021 | EPI_ISL_3877502 | 2021-09-02      |
| hCoV-19/Japan/PG-72396/2021 | EPI_ISL_3877505 | 2021-09-02      |
| hCoV-19/Japan/PG-72397/2021 | EPI_ISL_3877508 | 2021-09-02      |
| hCoV-19/Japan/PG-72398/2021 | EPI_ISL_3877510 | 2021-09-02      |
| hCoV-19/Japan/PG-72399/2021 | EPI_ISL_3877512 | 2021-09-02      |
| hCoV-19/Japan/PG-72400/2021 | EPI_ISL_3877516 | 2021-09-02      |
| hCoV-19/Japan/PG-72401/2021 | EPI_ISL_3877519 | 2021-09-02      |
| hCoV-19/Japan/PG-72402/2021 | EPI_ISL_3877521 | 2021-09-02      |
| hCoV-19/Japan/PG-72403/2021 | EPI_ISL_3877524 | 2021-09-02      |
| hCoV-19/Japan/PG-72404/2021 | EPI_ISL_3877527 | 2021-09-02      |
| hCoV-19/Japan/PG-72405/2021 | EPI_ISL_3877530 | 2021-09-02      |
| hCoV-19/Japan/PG-72406/2021 | EPI_ISL_3877533 | 2021-09-02      |
| hCoV-19/Japan/PG-72407/2021 | EPI_ISL_3877536 | 2021-09-02      |
| hCoV-19/Japan/PG-72408/2021 | EPI_ISL_3877539 | 2021-09-02      |
| hCoV-19/Japan/PG-72409/2021 | EPI_ISL_3877542 | 2021-09-02      |
| hCoV-19/Japan/PG-72410/2021 | EPI_ISL_3877544 | 2021-09-02      |
| hCoV-19/Japan/PG-72411/2021 | EPI_ISL_3877547 | 2021-09-02      |
| hCoV-19/Japan/PG-72412/2021 | EPI_ISL_3877549 | 2021-09-02      |
| hCoV-19/Japan/PG-72413/2021 | EPI_ISL_3877552 | 2021-09-02      |
| hCoV-19/Japan/PG-72414/2021 | EPI_ISL_3877554 | 2021-09-02      |

| virus_name                  | epiID           | submission_date |
|-----------------------------|-----------------|-----------------|
| hCoV-19/Japan/PG-72415/2021 | EPI_ISL_3877555 | 2021-09-02      |
| hCoV-19/Japan/PG-72416/2021 | EPI_ISL_3877558 | 2021-09-02      |
| hCoV-19/Japan/PG-72417/2021 | EPI_ISL_3877561 | 2021-09-02      |
| hCoV-19/Japan/PG-72418/2021 | EPI_ISL_3877563 | 2021-09-02      |
| hCoV-19/Japan/PG-72419/2021 | EPI_ISL_3877566 | 2021-09-02      |
| hCoV-19/Japan/PG-72420/2021 | EPI_ISL_3877569 | 2021-09-02      |
| hCoV-19/Japan/PG-72421/2021 | EPI_ISL_3877571 | 2021-09-02      |
| hCoV-19/Japan/PG-72422/2021 | EPI_ISL_3877574 | 2021-09-02      |
| hCoV-19/Japan/PG-72423/2021 | EPI_ISL_3877576 | 2021-09-02      |
| hCoV-19/Japan/PG-72424/2021 | EPI_ISL_3877579 | 2021-09-02      |
| hCoV-19/Japan/PG-72425/2021 | EPI_ISL_3877581 | 2021-09-02      |
| hCoV-19/Japan/PG-72426/2021 | EPI_ISL_3877585 | 2021-09-02      |
| hCoV-19/Japan/PG-72427/2021 | EPI_ISL_3877588 | 2021-09-02      |
| hCoV-19/Japan/PG-72428/2021 | EPI_ISL_3877590 | 2021-09-02      |
| hCoV-19/Japan/PG-72429/2021 | EPI_ISL_3877593 | 2021-09-02      |
| hCoV-19/Japan/PG-72430/2021 | EPI_ISL_3877596 | 2021-09-02      |
| hCoV-19/Japan/PG-72431/2021 | EPI_ISL_3877599 | 2021-09-02      |
| hCoV-19/Japan/PG-72432/2021 | EPI_ISL_3877602 | 2021-09-02      |
| hCoV-19/Japan/PG-72433/2021 | EPI_ISL_3877604 | 2021-09-02      |
| hCoV-19/Japan/PG-72434/2021 | EPI_ISL_3877607 | 2021-09-02      |
| hCoV-19/Japan/PG-72435/2021 | EPI_ISL_3877609 | 2021-09-02      |
| hCoV-19/Japan/PG-72436/2021 | EPI_ISL_3877612 | 2021-09-02      |
| hCoV-19/Japan/PG-72437/2021 | EPI_ISL_3877615 | 2021-09-02      |
| hCoV-19/Japan/PG-72438/2021 | EPI_ISL_3877617 | 2021-09-02      |
| hCoV-19/Japan/PG-72439/2021 | EPI_ISL_3877619 | 2021-09-02      |
| hCoV-19/Japan/PG-72440/2021 | EPI_ISL_3877621 | 2021-09-02      |
| hCoV-19/Japan/PG-72441/2021 | EPI_ISL_3877622 | 2021-09-02      |
| hCoV-19/Japan/PG-72442/2021 | EPI_ISL_3877624 | 2021-09-02      |
| hCoV-19/Japan/PG-72443/2021 | EPI_ISL_3877627 | 2021-09-02      |
| hCoV-19/Japan/PG-72444/2021 | EPI_ISL_3877629 | 2021-09-02      |
| hCoV-19/Japan/PG-72445/2021 | EPI_ISL_3877632 | 2021-09-02      |
| hCoV-19/Japan/PG-72446/2021 | EPI_ISL_3877636 | 2021-09-02      |
| hCoV-19/Japan/PG-72447/2021 | EPI_ISL_3877639 | 2021-09-02      |
| hCoV-19/Japan/PG-72448/2021 | EPI_ISL_3877642 | 2021-09-02      |
| hCoV-19/Japan/PG-72449/2021 | EPI_ISL_3877645 | 2021-09-02      |
| hCoV-19/Japan/PG-72450/2021 | EPI_ISL_3877648 | 2021-09-02      |
| hCoV-19/Japan/PG-72451/2021 | EPI_ISL_3877651 | 2021-09-02      |
| hCoV-19/Japan/PG-72452/2021 | EPI_ISL_3877654 | 2021-09-02      |
| hCoV-19/Japan/PG-72453/2021 | EPI_ISL_3877658 | 2021-09-02      |
| hCoV-19/Japan/PG-72454/2021 | EPI_ISL_3877661 | 2021-09-02      |
| hCoV-19/Japan/PG-72455/2021 | EPI_ISL_3877663 | 2021-09-02      |
| hCoV-19/Japan/PG-72456/2021 | EPI_ISL_3877665 | 2021-09-02      |
| hCoV-19/Japan/PG-72457/2021 | EPI_ISL_3877667 | 2021-09-02      |
| hCoV-19/Japan/PG-72458/2021 | EPI_ISL_3877671 | 2021-09-02      |
| hCoV-19/Japan/PG-72459/2021 | EPI_ISL_3877673 | 2021-09-02      |
| hCoV-19/Japan/PG-72460/2021 | EPI_ISL_3877677 | 2021-09-02      |
| hCoV-19/Japan/PG-72461/2021 | EPI_ISL_3877680 | 2021-09-02      |
| hCoV-19/Japan/PG-72462/2021 | EPI_ISL_3877683 | 2021-09-02      |
| hCoV-19/Japan/PG-72463/2021 | EPI_ISL_3877686 | 2021-09-02      |
| hCoV-19/Japan/PG-72464/2021 | EPI_ISL_3877688 | 2021-09-02      |
| hCoV-19/Japan/PG-72465/2021 | EPI_ISL_3877691 | 2021-09-02      |
| hCoV-19/Japan/PG-72466/2021 | EPI_ISL_3877694 | 2021-09-02      |
| hCoV-19/Japan/PG-72467/2021 | EPI_ISL_3877697 | 2021-09-02      |
| hCoV-19/Japan/PG-72468/2021 | EPI_ISL_3877700 | 2021-09-02      |

| virus_name                  | epiID           | submission_date |
|-----------------------------|-----------------|-----------------|
| hCoV-19/Japan/PG-72469/2021 | EPI_ISL_3877704 | 2021-09-02      |
| hCoV-19/Japan/PG-72470/2021 | EPI_ISL_3877707 | 2021-09-02      |
| hCoV-19/Japan/PG-72471/2021 | EPI_ISL_3877709 | 2021-09-02      |
| hCoV-19/Japan/PG-72472/2021 | EPI_ISL_3877711 | 2021-09-02      |
| hCoV-19/Japan/PG-72473/2021 | EPI_ISL_3877714 | 2021-09-02      |
| hCoV-19/Japan/PG-72474/2021 | EPI_ISL_3877715 | 2021-09-02      |
| hCoV-19/Japan/PG-72475/2021 | EPI_ISL_3877717 | 2021-09-02      |
| hCoV-19/Japan/PG-72476/2021 | EPI_ISL_3877720 | 2021-09-02      |
| hCoV-19/Japan/PG-72477/2021 | EPI_ISL_3877724 | 2021-09-02      |
| hCoV-19/Japan/PG-72478/2021 | EPI_ISL_3877727 | 2021-09-02      |
| hCoV-19/Japan/PG-72479/2021 | EPI_ISL_3877730 | 2021-09-02      |
| hCoV-19/Japan/PG-72480/2021 | EPI_ISL_3877733 | 2021-09-02      |
| hCoV-19/Japan/PG-72481/2021 | EPI_ISL_3877736 | 2021-09-02      |
| hCoV-19/Japan/PG-72482/2021 | EPI_ISL_3877740 | 2021-09-02      |
| hCoV-19/Japan/PG-72483/2021 | EPI_ISL_3877742 | 2021-09-02      |
| hCoV-19/Japan/PG-72484/2021 | EPI_ISL_3877745 | 2021-09-02      |
| hCoV-19/Japan/PG-72485/2021 | EPI_ISL_3877748 | 2021-09-02      |
| hCoV-19/Japan/PG-72486/2021 | EPI_ISL_3877751 | 2021-09-02      |
| hCoV-19/Japan/PG-72487/2021 | EPI_ISL_3877754 | 2021-09-02      |
| hCoV-19/Japan/PG-72488/2021 | EPI_ISL_3877757 | 2021-09-02      |
| hCoV-19/Japan/PG-72489/2021 | EPI_ISL_3877759 | 2021-09-02      |
| hCoV-19/Japan/PG-72490/2021 | EPI_ISL_3877763 | 2021-09-02      |
| hCoV-19/Japan/PG-72491/2021 | EPI_ISL_3877766 | 2021-09-02      |
| hCoV-19/Japan/PG-72492/2021 | EPI_ISL_3877769 | 2021-09-02      |
| hCoV-19/Japan/PG-72493/2021 | EPI_ISL_3877771 | 2021-09-02      |
| hCoV-19/Japan/PG-72494/2021 | EPI_ISL_3877774 | 2021-09-02      |
| hCoV-19/Japan/PG-72495/2021 | EPI_ISL_3877777 | 2021-09-02      |
| hCoV-19/Japan/PG-72496/2021 | EPI_ISL_3877780 | 2021-09-02      |
| hCoV-19/Japan/PG-72497/2021 | EPI_ISL_3877783 | 2021-09-02      |
| hCoV-19/Japan/PG-72498/2021 | EPI_ISL_3877786 | 2021-09-02      |
| hCoV-19/Japan/PG-72499/2021 | EPI_ISL_3877790 | 2021-09-02      |
| hCoV-19/Japan/PG-72500/2021 | EPI_ISL_3877792 | 2021-09-02      |
| hCoV-19/Japan/PG-72501/2021 | EPI_ISL_3877795 | 2021-09-02      |
| hCoV-19/Japan/PG-72502/2021 | EPI_ISL_3877797 | 2021-09-02      |
| hCoV-19/Japan/PG-72503/2021 | EPI_ISL_3877800 | 2021-09-02      |
| hCoV-19/Japan/PG-72504/2021 | EPI_ISL_3877803 | 2021-09-02      |
| hCoV-19/Japan/PG-72505/2021 | EPI_ISL_3877806 | 2021-09-02      |
| hCoV-19/Japan/PG-72506/2021 | EPI_ISL_3877808 | 2021-09-02      |
| hCoV-19/Japan/PG-72507/2021 | EPI_ISL_3877811 | 2021-09-02      |
| hCoV-19/Japan/PG-72508/2021 | EPI_ISL_3877814 | 2021-09-02      |
| hCoV-19/Japan/PG-72509/2021 | EPI_ISL_3877816 | 2021-09-02      |
| hCoV-19/Japan/PG-72510/2021 | EPI_ISL_3877819 | 2021-09-02      |
| hCoV-19/Japan/PG-72511/2021 | EPI_ISL_3877822 | 2021-09-02      |
| hCoV-19/Japan/PG-72512/2021 | EPI_ISL_3877825 | 2021-09-02      |
| hCoV-19/Japan/PG-72513/2021 | EPI_ISL_3877828 | 2021-09-02      |
| hCoV-19/Japan/PG-72514/2021 | EPI_ISL_3877831 | 2021-09-02      |
| hCoV-19/Japan/PG-72515/2021 | EPI_ISL_3877834 | 2021-09-02      |
| hCoV-19/Japan/PG-72516/2021 | EPI_ISL_3877836 | 2021-09-02      |
| hCoV-19/Japan/PG-72517/2021 | EPI_ISL_3877840 | 2021-09-02      |
| hCoV-19/Japan/PG-72518/2021 | EPI_ISL_3877842 | 2021-09-02      |
| hCoV-19/Japan/PG-72519/2021 | EPI_ISL_3877844 | 2021-09-02      |
| hCoV-19/Japan/PG-72520/2021 | EPI_ISL_3877847 | 2021-09-02      |
| hCoV-19/Japan/PG-72521/2021 | EPI_ISL_3877850 | 2021-09-02      |
| hCoV-19/Japan/PG-72522/2021 | EPI_ISL_3877853 | 2021-09-02      |

| virus_name                  | epiID           | submission_date |
|-----------------------------|-----------------|-----------------|
| hCoV-19/Japan/PG-72523/2021 | EPI_ISL_3877856 | 2021-09-02      |
| hCoV-19/Japan/PG-72524/2021 | EPI_ISL_3877858 | 2021-09-02      |
| hCoV-19/Japan/PG-72525/2021 | EPI_ISL_3877861 | 2021-09-02      |
| hCoV-19/Japan/PG-72526/2021 | EPI_ISL_3877864 | 2021-09-02      |
| hCoV-19/Japan/PG-72527/2021 | EPI_ISL_3877867 | 2021-09-02      |
| hCoV-19/Japan/PG-72528/2021 | EPI_ISL_3877869 | 2021-09-02      |
| hCoV-19/Japan/PG-72529/2021 | EPI_ISL_3877873 | 2021-09-02      |
| hCoV-19/Japan/PG-72530/2021 | EPI_ISL_3877876 | 2021-09-02      |
| hCoV-19/Japan/PG-72531/2021 | EPI_ISL_3877879 | 2021-09-02      |
| hCoV-19/Japan/PG-72532/2021 | EPI_ISL_3877881 | 2021-09-02      |
| hCoV-19/Japan/PG-72533/2021 | EPI_ISL_3877883 | 2021-09-02      |
| hCoV-19/Japan/PG-72534/2021 | EPI_ISL_3877887 | 2021-09-02      |
| hCoV-19/Japan/PG-72535/2021 | EPI_ISL_3877890 | 2021-09-02      |
| hCoV-19/Japan/PG-72536/2021 | EPI_ISL_3877893 | 2021-09-02      |
| hCoV-19/Japan/PG-72537/2021 | EPI_ISL_3877895 | 2021-09-02      |
| hCoV-19/Japan/PG-72538/2021 | EPI_ISL_3877898 | 2021-09-02      |
| hCoV-19/Japan/PG-72539/2021 | EPI_ISL_3877901 | 2021-09-02      |
| hCoV-19/Japan/PG-72540/2021 | EPI_ISL_3877904 | 2021-09-02      |
| hCoV-19/Japan/PG-72541/2021 | EPI_ISL_3877907 | 2021-09-02      |
| hCoV-19/Japan/PG-72542/2021 | EPI_ISL_3877910 | 2021-09-02      |
| hCoV-19/Japan/PG-72543/2021 | EPI_ISL_3877912 | 2021-09-02      |
| hCoV-19/Japan/PG-72544/2021 | EPI_ISL_3877915 | 2021-09-02      |
| hCoV-19/Japan/PG-72545/2021 | EPI_ISL_3877918 | 2021-09-02      |
| hCoV-19/Japan/PG-72546/2021 | EPI_ISL_3877920 | 2021-09-02      |
| hCoV-19/Japan/PG-72547/2021 | EPI_ISL_3877922 | 2021-09-02      |
| hCoV-19/Japan/PG-72548/2021 | EPI_ISL_3877926 | 2021-09-02      |
| hCoV-19/Japan/PG-72549/2021 | EPI_ISL_3877927 | 2021-09-02      |
| hCoV-19/Japan/PG-72550/2021 | EPI_ISL_3877929 | 2021-09-02      |
| hCoV-19/Japan/PG-72551/2021 | EPI_ISL_3877931 | 2021-09-02      |
| hCoV-19/Japan/PG-72552/2021 | EPI_ISL_3877935 | 2021-09-02      |
| hCoV-19/Japan/PG-72553/2021 | EPI_ISL_3877937 | 2021-09-02      |
| hCoV-19/Japan/PG-72554/2021 | EPI_ISL_3877940 | 2021-09-02      |
| hCoV-19/Japan/PG-72555/2021 | EPI_ISL_3877942 | 2021-09-02      |
| hCoV-19/Japan/PG-72556/2021 | EPI_ISL_3877946 | 2021-09-02      |
| hCoV-19/Japan/PG-72557/2021 | EPI_ISL_3877948 | 2021-09-02      |
| hCoV-19/Japan/PG-72558/2021 | EPI_ISL_3877951 | 2021-09-02      |
| hCoV-19/Japan/PG-72559/2021 | EPI_ISL_3877954 | 2021-09-02      |
| hCoV-19/Japan/PG-72560/2021 | EPI_ISL_3877957 | 2021-09-02      |
| hCoV-19/Japan/PG-72561/2021 | EPI_ISL_3877960 | 2021-09-02      |
| hCoV-19/Japan/PG-72562/2021 | EPI_ISL_3877963 | 2021-09-02      |
| hCoV-19/Japan/PG-72563/2021 | EPI_ISL_3877966 | 2021-09-02      |
| hCoV-19/Japan/PG-72564/2021 | EPI_ISL_3877968 | 2021-09-02      |
| hCoV-19/Japan/PG-72565/2021 | EPI_ISL_3877971 | 2021-09-02      |
| hCoV-19/Japan/PG-72566/2021 | EPI_ISL_3877974 | 2021-09-02      |
| hCoV-19/Japan/PG-72567/2021 | EPI_ISL_3877976 | 2021-09-02      |
| hCoV-19/Japan/PG-72568/2021 | EPI_ISL_3877978 | 2021-09-02      |
| hCoV-19/Japan/PG-72569/2021 | EPI_ISL_3877981 | 2021-09-02      |
| hCoV-19/Japan/PG-72570/2021 | EPI_ISL_3877983 | 2021-09-02      |
| hCoV-19/Japan/PG-72571/2021 | EPI_ISL_3877984 | 2021-09-02      |
| hCoV-19/Japan/PG-72572/2021 | EPI_ISL_3877986 | 2021-09-02      |
| hCoV-19/Japan/PG-72573/2021 | EPI_ISL_3877989 | 2021-09-02      |
| hCoV-19/Japan/PG-72574/2021 | EPI_ISL_3877991 | 2021-09-02      |
| hCoV-19/Japan/PG-72575/2021 | EPI_ISL_3877994 | 2021-09-02      |
| hCoV-19/Japan/PG-72576/2021 | EPI_ISL_3877996 | 2021-09-02      |

| virus_name                  | epiID           | submission_date |
|-----------------------------|-----------------|-----------------|
| hCoV-19/Japan/PG-72577/2021 | EPI_ISL_3877999 | 2021-09-02      |
| hCoV-19/Japan/PG-72578/2021 | EPI_ISL_3878002 | 2021-09-02      |
| hCoV-19/Japan/PG-72579/2021 | EPI_ISL_3878004 | 2021-09-02      |
| hCoV-19/Japan/PG-72580/2021 | EPI_ISL_3878006 | 2021-09-02      |
| hCoV-19/Japan/PG-72581/2021 | EPI_ISL_3878007 | 2021-09-02      |
| hCoV-19/Japan/PG-72582/2021 | EPI_ISL_3878010 | 2021-09-02      |
| hCoV-19/Japan/PG-72583/2021 | EPI_ISL_3878012 | 2021-09-02      |
| hCoV-19/Japan/PG-72584/2021 | EPI_ISL_3878014 | 2021-09-02      |
| hCoV-19/Japan/PG-72585/2021 | EPI_ISL_3878017 | 2021-09-02      |
| hCoV-19/Japan/PG-72586/2021 | EPI_ISL_3878018 | 2021-09-02      |
| hCoV-19/Japan/PG-72587/2021 | EPI_ISL_3878019 | 2021-09-02      |
| hCoV-19/Japan/PG-72588/2021 | EPI_ISL_3878021 | 2021-09-02      |
| hCoV-19/Japan/PG-72589/2021 | EPI_ISL_3878023 | 2021-09-02      |
| hCoV-19/Japan/PG-72590/2021 | EPI_ISL_3878025 | 2021-09-02      |
| hCoV-19/Japan/PG-72591/2021 | EPI_ISL_3878028 | 2021-09-02      |
| hCoV-19/Japan/PG-72592/2021 | EPI_ISL_3878030 | 2021-09-02      |
| hCoV-19/Japan/PG-72593/2021 | EPI_ISL_3878032 | 2021-09-02      |
| hCoV-19/Japan/PG-72594/2021 | EPI_ISL_3878035 | 2021-09-02      |
| hCoV-19/Japan/PG-72595/2021 | EPI_ISL_3878038 | 2021-09-02      |
| hCoV-19/Japan/PG-72596/2021 | EPI_ISL_3878040 | 2021-09-02      |
| hCoV-19/Japan/PG-72597/2021 | EPI_ISL_3878043 | 2021-09-02      |
| hCoV-19/Japan/PG-72598/2021 | EPI_ISL_3878047 | 2021-09-02      |
| hCoV-19/Japan/PG-72599/2021 | EPI_ISL_3878052 | 2021-09-02      |
| hCoV-19/Japan/PG-72600/2021 | EPI_ISL_3878056 | 2021-09-02      |
| hCoV-19/Japan/PG-72601/2021 | EPI_ISL_3878059 | 2021-09-02      |
| hCoV-19/Japan/PG-72602/2021 | EPI_ISL_3878064 | 2021-09-02      |
| hCoV-19/Japan/PG-72603/2021 | EPI_ISL_3878069 | 2021-09-02      |
| hCoV-19/Japan/PG-72604/2021 | EPI_ISL_3878074 | 2021-09-02      |
| hCoV-19/Japan/PG-72605/2021 | EPI_ISL_3878079 | 2021-09-02      |
| hCoV-19/Japan/PG-72606/2021 | EPI_ISL_3878083 | 2021-09-02      |
| hCoV-19/Japan/PG-72607/2021 | EPI_ISL_3878087 | 2021-09-02      |
| hCoV-19/Japan/PG-72608/2021 | EPI_ISL_3878092 | 2021-09-02      |
| hCoV-19/Japan/PG-72609/2021 | EPI_ISL_3878096 | 2021-09-02      |
| hCoV-19/Japan/PG-72610/2021 | EPI_ISL_3878099 | 2021-09-02      |
| hCoV-19/Japan/PG-72611/2021 | EPI_ISL_3878103 | 2021-09-02      |
| hCoV-19/Japan/PG-72612/2021 | EPI_ISL_3878107 | 2021-09-02      |
| hCoV-19/Japan/PG-72613/2021 | EPI_ISL_3878112 | 2021-09-02      |
| hCoV-19/Japan/PG-72614/2021 | EPI_ISL_3878117 | 2021-09-02      |
| hCoV-19/Japan/PG-72615/2021 | EPI_ISL_3878121 | 2021-09-02      |
| hCoV-19/Japan/PG-72616/2021 | EPI_ISL_3878125 | 2021-09-02      |
| hCoV-19/Japan/PG-72617/2021 | EPI_ISL_3878130 | 2021-09-02      |
| hCoV-19/Japan/PG-72618/2021 | EPI_ISL_3878134 | 2021-09-02      |
| hCoV-19/Japan/PG-72619/2021 | EPI_ISL_3878138 | 2021-09-02      |
| hCoV-19/Japan/PG-72620/2021 | EPI_ISL_3878140 | 2021-09-02      |
| hCoV-19/Japan/PG-72621/2021 | EPI_ISL_3878146 | 2021-09-02      |
| hCoV-19/Japan/PG-72622/2021 | EPI_ISL_3878150 | 2021-09-02      |
| hCoV-19/Japan/PG-72623/2021 | EPI_ISL_3878153 | 2021-09-02      |
| hCoV-19/Japan/PG-72624/2021 | EPI_ISL_3878158 | 2021-09-02      |
| hCoV-19/Japan/PG-72625/2021 | EPI_ISL_3878162 | 2021-09-02      |
| hCoV-19/Japan/PG-72626/2021 | EPI_ISL_3878165 | 2021-09-02      |
| hCoV-19/Japan/PG-72627/2021 | EPI_ISL_3878169 | 2021-09-02      |
| hCoV-19/Japan/PG-72628/2021 | EPI_ISL_3878173 | 2021-09-02      |
| hCoV-19/Japan/PG-72629/2021 | EPI_ISL_3878177 | 2021-09-02      |
| hCoV-19/Japan/PG-72630/2021 | EPI_ISL_3878183 | 2021-09-02      |

| virus_name                  | epiID           | submission_date |
|-----------------------------|-----------------|-----------------|
| hCoV-19/Japan/PG-72631/2021 | EPI_ISL_3878187 | 2021-09-02      |
| hCoV-19/Japan/PG-72632/2021 | EPI_ISL_3878189 | 2021-09-02      |
| hCoV-19/Japan/PG-72633/2021 | EPI_ISL_3878192 | 2021-09-02      |
| hCoV-19/Japan/PG-72634/2021 | EPI_ISL_3878195 | 2021-09-02      |
| hCoV-19/Japan/PG-72635/2021 | EPI_ISL_3878198 | 2021-09-02      |
| hCoV-19/Japan/PG-72636/2021 | EPI_ISL_3878202 | 2021-09-02      |
| hCoV-19/Japan/PG-72637/2021 | EPI_ISL_3878204 | 2021-09-02      |
| hCoV-19/Japan/PG-72638/2021 | EPI_ISL_3878207 | 2021-09-02      |
| hCoV-19/Japan/PG-72639/2021 | EPI_ISL_3878211 | 2021-09-02      |
| hCoV-19/Japan/PG-72640/2021 | EPI_ISL_3878213 | 2021-09-02      |
| hCoV-19/Japan/PG-72641/2021 | EPI_ISL_3878216 | 2021-09-02      |
| hCoV-19/Japan/PG-72642/2021 | EPI_ISL_3878220 | 2021-09-02      |
| hCoV-19/Japan/PG-72643/2021 | EPI_ISL_3878223 | 2021-09-02      |
| hCoV-19/Japan/PG-72644/2021 | EPI_ISL_3878226 | 2021-09-02      |
| hCoV-19/Japan/PG-72645/2021 | EPI_ISL_3878229 | 2021-09-02      |
| hCoV-19/Japan/PG-72646/2021 | EPI_ISL_3878231 | 2021-09-02      |
| hCoV-19/Japan/PG-72647/2021 | EPI_ISL_3878232 | 2021-09-02      |
| hCoV-19/Japan/PG-72648/2021 | EPI_ISL_3878237 | 2021-09-02      |
| hCoV-19/Japan/PG-72649/2021 | EPI_ISL_3878241 | 2021-09-02      |
| hCoV-19/Japan/PG-72650/2021 | EPI_ISL_3878244 | 2021-09-02      |
| hCoV-19/Japan/PG-72651/2021 | EPI_ISL_3878246 | 2021-09-02      |
| hCoV-19/Japan/PG-72652/2021 | EPI_ISL_3878250 | 2021-09-02      |
| hCoV-19/Japan/PG-72653/2021 | EPI_ISL_3878253 | 2021-09-02      |
| hCoV-19/Japan/PG-72654/2021 | EPI_ISL_3878255 | 2021-09-02      |
| hCoV-19/Japan/PG-72655/2021 | EPI_ISL_3878258 | 2021-09-02      |
| hCoV-19/Japan/PG-72656/2021 | EPI_ISL_3878261 | 2021-09-02      |
| hCoV-19/Japan/PG-72657/2021 | EPI_ISL_3878264 | 2021-09-02      |
| hCoV-19/Japan/PG-72658/2021 | EPI_ISL_3878267 | 2021-09-02      |
| hCoV-19/Japan/PG-72659/2021 | EPI_ISL_3878272 | 2021-09-02      |
| hCoV-19/Japan/PG-72660/2021 | EPI_ISL_3878276 | 2021-09-02      |
| hCoV-19/Japan/PG-72661/2021 | EPI_ISL_3878280 | 2021-09-02      |
| hCoV-19/Japan/PG-72662/2021 | EPI_ISL_3878282 | 2021-09-02      |
| hCoV-19/Japan/PG-72663/2021 | EPI_ISL_3878285 | 2021-09-02      |
| hCoV-19/Japan/PG-72664/2021 | EPI_ISL_3878286 | 2021-09-02      |
| hCoV-19/Japan/PG-72665/2021 | EPI_ISL_3878289 | 2021-09-02      |
| hCoV-19/Japan/PG-72666/2021 | EPI_ISL_3878292 | 2021-09-02      |
| hCoV-19/Japan/PG-72667/2021 | EPI_ISL_3878296 | 2021-09-02      |
| hCoV-19/Japan/PG-72668/2021 | EPI_ISL_3878301 | 2021-09-02      |
| hCoV-19/Japan/PG-72669/2021 | EPI_ISL_3878303 | 2021-09-02      |
| hCoV-19/Japan/PG-72670/2021 | EPI_ISL_3878307 | 2021-09-02      |
| hCoV-19/Japan/PG-72671/2021 | EPI_ISL_3878308 | 2021-09-02      |
| hCoV-19/Japan/PG-72672/2021 | EPI_ISL_3878313 | 2021-09-02      |
| hCoV-19/Japan/PG-72673/2021 | EPI_ISL_3878316 | 2021-09-02      |
| hCoV-19/Japan/PG-72674/2021 | EPI_ISL_3878319 | 2021-09-02      |
| hCoV-19/Japan/PG-72675/2021 | EPI_ISL_3878322 | 2021-09-02      |
| hCoV-19/Japan/PG-72676/2021 | EPI_ISL_3878325 | 2021-09-02      |
| hCoV-19/Japan/PG-72677/2021 | EPI_ISL_3878328 | 2021-09-02      |
| hCoV-19/Japan/PG-72678/2021 | EPI_ISL_3878330 | 2021-09-02      |
| hCoV-19/Japan/PG-72679/2021 | EPI_ISL_3878332 | 2021-09-02      |
| hCoV-19/Japan/PG-72680/2021 | EPI_ISL_3878335 | 2021-09-02      |
| hCoV-19/Japan/PG-72681/2021 | EPI_ISL_3878340 | 2021-09-02      |
| hCoV-19/Japan/PG-72682/2021 | EPI_ISL_3878343 | 2021-09-02      |
| hCoV-19/Japan/PG-72683/2021 | EPI_ISL_3878347 | 2021-09-02      |
| hCoV-19/Japan/PG-72684/2021 | EPI_ISL_3878351 | 2021-09-02      |

| virus_name                  | epiID           | submission_date |
|-----------------------------|-----------------|-----------------|
| hCoV-19/Japan/PG-72685/2021 | EPI_ISL_3878355 | 2021-09-02      |
| hCoV-19/Japan/PG-72686/2021 | EPI_ISL_3878357 | 2021-09-02      |
| hCoV-19/Japan/PG-72687/2021 | EPI_ISL_3878361 | 2021-09-02      |
| hCoV-19/Japan/PG-72688/2021 | EPI_ISL_3878366 | 2021-09-02      |
| hCoV-19/Japan/PG-72689/2021 | EPI_ISL_3878369 | 2021-09-02      |
| hCoV-19/Japan/PG-72690/2021 | EPI_ISL_3878372 | 2021-09-02      |
| hCoV-19/Japan/PG-72691/2021 | EPI_ISL_3878374 | 2021-09-02      |
| hCoV-19/Japan/PG-72692/2021 | EPI_ISL_3878376 | 2021-09-02      |
| hCoV-19/Japan/PG-72693/2021 | EPI_ISL_3878378 | 2021-09-02      |
| hCoV-19/Japan/PG-72694/2021 | EPI_ISL_3878381 | 2021-09-02      |
| hCoV-19/Japan/PG-72695/2021 | EPI_ISL_3878382 | 2021-09-02      |
| hCoV-19/Japan/PG-72696/2021 | EPI_ISL_3878385 | 2021-09-02      |
| hCoV-19/Japan/PG-72697/2021 | EPI_ISL_3878387 | 2021-09-02      |
| hCoV-19/Japan/PG-72698/2021 | EPI_ISL_3878390 | 2021-09-02      |
| hCoV-19/Japan/PG-72699/2021 | EPI_ISL_3878394 | 2021-09-02      |
| hCoV-19/Japan/PG-72700/2021 | EPI_ISL_3878397 | 2021-09-02      |
| hCoV-19/Japan/PG-72701/2021 | EPI_ISL_3878401 | 2021-09-02      |
| hCoV-19/Japan/PG-72702/2021 | EPI_ISL_3878405 | 2021-09-02      |
| hCoV-19/Japan/PG-72703/2021 | EPI_ISL_3878408 | 2021-09-02      |
| hCoV-19/Japan/PG-72704/2021 | EPI_ISL_3878412 | 2021-09-02      |
| hCoV-19/Japan/PG-72705/2021 | EPI_ISL_3878416 | 2021-09-02      |
| hCoV-19/Japan/PG-72706/2021 | EPI_ISL_3878419 | 2021-09-02      |
| hCoV-19/Japan/PG-72707/2021 | EPI_ISL_3878423 | 2021-09-02      |
| hCoV-19/Japan/PG-72708/2021 | EPI_ISL_3878427 | 2021-09-02      |
| hCoV-19/Japan/PG-72709/2021 | EPI_ISL_3878429 | 2021-09-02      |
| hCoV-19/Japan/PG-72710/2021 | EPI_ISL_3878430 | 2021-09-02      |
| hCoV-19/Japan/PG-72711/2021 | EPI_ISL_3878433 | 2021-09-02      |
| hCoV-19/Japan/PG-72712/2021 | EPI_ISL_3878436 | 2021-09-02      |
| hCoV-19/Japan/PG-72713/2021 | EPI_ISL_3878437 | 2021-09-02      |
| hCoV-19/Japan/PG-72714/2021 | EPI_ISL_3878440 | 2021-09-02      |
| hCoV-19/Japan/PG-72715/2021 | EPI_ISL_3878441 | 2021-09-02      |
| hCoV-19/Japan/PG-72716/2021 | EPI_ISL_3878443 | 2021-09-02      |
| hCoV-19/Japan/PG-72717/2021 | EPI_ISL_3878446 | 2021-09-02      |
| hCoV-19/Japan/PG-72718/2021 | EPI_ISL_3878448 | 2021-09-02      |
| hCoV-19/Japan/PG-72719/2021 | EPI_ISL_3878453 | 2021-09-02      |
| hCoV-19/Japan/PG-72720/2021 | EPI_ISL_3878456 | 2021-09-02      |
| hCoV-19/Japan/PG-72721/2021 | EPI_ISL_3878458 | 2021-09-02      |
| hCoV-19/Japan/PG-72722/2021 | EPI_ISL_3878460 | 2021-09-02      |
| hCoV-19/Japan/PG-72723/2021 | EPI_ISL_3878463 | 2021-09-02      |
| hCoV-19/Japan/PG-72724/2021 | EPI_ISL_3878467 | 2021-09-02      |
| hCoV-19/Japan/PG-72725/2021 | EPI_ISL_3878472 | 2021-09-02      |
| hCoV-19/Japan/PG-72726/2021 | EPI_ISL_3878476 | 2021-09-02      |
| hCoV-19/Japan/PG-72727/2021 | EPI_ISL_3878480 | 2021-09-02      |
| hCoV-19/Japan/PG-72728/2021 | EPI_ISL_3878484 | 2021-09-02      |
| hCoV-19/Japan/PG-72729/2021 | EPI_ISL_3878496 | 2021-09-02      |
| hCoV-19/Japan/PG-72730/2021 | EPI_ISL_3878500 | 2021-09-02      |
| hCoV-19/Japan/PG-72731/2021 | EPI_ISL_3878502 | 2021-09-02      |
| hCoV-19/Japan/PG-72732/2021 | EPI_ISL_3878503 | 2021-09-02      |
| hCoV-19/Japan/PG-72733/2021 | EPI_ISL_3878505 | 2021-09-02      |
| hCoV-19/Japan/PG-72734/2021 | EPI_ISL_3878507 | 2021-09-02      |
| hCoV-19/Japan/PG-72735/2021 | EPI_ISL_3878508 | 2021-09-02      |
| hCoV-19/Japan/PG-72736/2021 | EPI_ISL_3878509 | 2021-09-02      |
| hCoV-19/Japan/PG-72737/2021 | EPI_ISL_3878511 | 2021-09-02      |
| hCoV-19/Japan/PG-72738/2021 | EPI_ISL_3878512 | 2021-09-02      |

| virus_name                  | epiID           | submission_date |
|-----------------------------|-----------------|-----------------|
| hCoV-19/Japan/PG-72739/2021 | EPI_ISL_3878514 | 2021-09-02      |
| hCoV-19/Japan/PG-72740/2021 | EPI_ISL_3878516 | 2021-09-02      |
| hCoV-19/Japan/PG-72741/2021 | EPI_ISL_3878518 | 2021-09-02      |
| hCoV-19/Japan/PG-72742/2021 | EPI_ISL_3878520 | 2021-09-02      |
| hCoV-19/Japan/PG-72743/2021 | EPI_ISL_3878521 | 2021-09-02      |
| hCoV-19/Japan/PG-72744/2021 | EPI_ISL_3878523 | 2021-09-02      |
| hCoV-19/Japan/PG-72745/2021 | EPI_ISL_3878524 | 2021-09-02      |
| hCoV-19/Japan/PG-72746/2021 | EPI_ISL_3878525 | 2021-09-02      |
| hCoV-19/Japan/PG-72747/2021 | EPI_ISL_3878527 | 2021-09-02      |
| hCoV-19/Japan/PG-72748/2021 | EPI_ISL_3878528 | 2021-09-02      |
| hCoV-19/Japan/PG-72749/2021 | EPI_ISL_3878529 | 2021-09-02      |
| hCoV-19/Japan/PG-72750/2021 | EPI_ISL_3878531 | 2021-09-02      |
| hCoV-19/Japan/PG-72751/2021 | EPI_ISL_3878532 | 2021-09-02      |
| hCoV-19/Japan/PG-72752/2021 | EPI_ISL_3878534 | 2021-09-02      |
| hCoV-19/Japan/PG-72753/2021 | EPI_ISL_3878536 | 2021-09-02      |
| hCoV-19/Japan/PG-72754/2021 | EPI_ISL_3878538 | 2021-09-02      |
| hCoV-19/Japan/PG-72755/2021 | EPI_ISL_3878539 | 2021-09-02      |
| hCoV-19/Japan/PG-72756/2021 | EPI_ISL_3878541 | 2021-09-02      |
| hCoV-19/Japan/PG-72757/2021 | EPI_ISL_3878543 | 2021-09-02      |
| hCoV-19/Japan/PG-72758/2021 | EPI_ISL_3878545 | 2021-09-02      |
| hCoV-19/Japan/PG-72759/2021 | EPI_ISL_3878547 | 2021-09-02      |
| hCoV-19/Japan/PG-72760/2021 | EPI_ISL_3878549 | 2021-09-02      |
| hCoV-19/Japan/PG-72761/2021 | EPI_ISL_3878551 | 2021-09-02      |
| hCoV-19/Japan/PG-72762/2021 | EPI_ISL_3878552 | 2021-09-02      |
| hCoV-19/Japan/PG-72763/2021 | EPI_ISL_3878554 | 2021-09-02      |
| hCoV-19/Japan/PG-72764/2021 | EPI_ISL_3878555 | 2021-09-02      |
| hCoV-19/Japan/PG-72765/2021 | EPI_ISL_3878556 | 2021-09-02      |
| hCoV-19/Japan/PG-72766/2021 | EPI_ISL_3878558 | 2021-09-02      |
| hCoV-19/Japan/PG-72767/2021 | EPI_ISL_3878559 | 2021-09-02      |
| hCoV-19/Japan/PG-72768/2021 | EPI_ISL_3878561 | 2021-09-02      |
| hCoV-19/Japan/PG-72769/2021 | EPI_ISL_3878562 | 2021-09-02      |
| hCoV-19/Japan/PG-72770/2021 | EPI_ISL_3878564 | 2021-09-02      |
| hCoV-19/Japan/PG-72771/2021 | EPI_ISL_3878565 | 2021-09-02      |
| hCoV-19/Japan/PG-72772/2021 | EPI_ISL_3878566 | 2021-09-02      |
| hCoV-19/Japan/PG-72773/2021 | EPI_ISL_3878568 | 2021-09-02      |
| hCoV-19/Japan/PG-72774/2021 | EPI_ISL_3878570 | 2021-09-02      |
| hCoV-19/Japan/PG-72775/2021 | EPI_ISL_3878571 | 2021-09-02      |
| hCoV-19/Japan/PG-72776/2021 | EPI_ISL_3878572 | 2021-09-02      |
| hCoV-19/Japan/PG-72777/2021 | EPI_ISL_3878573 | 2021-09-02      |
| hCoV-19/Japan/PG-72778/2021 | EPI_ISL_3878575 | 2021-09-02      |
| hCoV-19/Japan/PG-72779/2021 | EPI_ISL_3878576 | 2021-09-02      |
| hCoV-19/Japan/PG-72780/2021 | EPI_ISL_3878578 | 2021-09-02      |
| hCoV-19/Japan/PG-72781/2021 | EPI_ISL_3878580 | 2021-09-02      |
| hCoV-19/Japan/PG-72782/2021 | EPI_ISL_3878582 | 2021-09-02      |
| hCoV-19/Japan/PG-72783/2021 | EPI_ISL_3878583 | 2021-09-02      |
| hCoV-19/Japan/PG-72784/2021 | EPI_ISL_3878585 | 2021-09-02      |
| hCoV-19/Japan/PG-72785/2021 | EPI_ISL_3878587 | 2021-09-02      |
| hCoV-19/Japan/PG-72786/2021 | EPI_ISL_3878589 | 2021-09-02      |
| hCoV-19/Japan/PG-72787/2021 | EPI_ISL_3878591 | 2021-09-02      |
| hCoV-19/Japan/PG-72788/2021 | EPI_ISL_3878593 | 2021-09-02      |
| hCoV-19/Japan/PG-72789/2021 | EPI_ISL_3878594 | 2021-09-02      |
| hCoV-19/Japan/PG-72790/2021 | EPI_ISL_3878596 | 2021-09-02      |
| hCoV-19/Japan/PG-72791/2021 | EPI_ISL_3878598 | 2021-09-02      |
| hCoV-19/Japan/PG-72792/2021 | EPI_ISL_3878599 | 2021-09-02      |



| virus_name                  | epiID           | submission_date |
|-----------------------------|-----------------|-----------------|
| hCoV-19/Japan/PG-72793/2021 | EPI_ISL_3878601 | 2021-09-02      |
| hCoV-19/Japan/PG-72794/2021 | EPI_ISL_3878603 | 2021-09-02      |
| hCoV-19/Japan/PG-72795/2021 | EPI_ISL_3878605 | 2021-09-02      |
| hCoV-19/Japan/PG-72796/2021 | EPI_ISL_3878606 | 2021-09-02      |
| hCoV-19/Japan/PG-72797/2021 | EPI_ISL_3878608 | 2021-09-02      |
| hCoV-19/Japan/PG-72798/2021 | EPI_ISL_3878610 | 2021-09-02      |
| hCoV-19/Japan/PG-72799/2021 | EPI_ISL_3878611 | 2021-09-02      |
| hCoV-19/Japan/PG-72800/2021 | EPI_ISL_3878613 | 2021-09-02      |
| hCoV-19/Japan/PG-72801/2021 | EPI_ISL_3878615 | 2021-09-02      |
| hCoV-19/Japan/PG-72802/2021 | EPI_ISL_3878617 | 2021-09-02      |
| hCoV-19/Japan/PG-72803/2021 | EPI_ISL_3878619 | 2021-09-02      |
| hCoV-19/Japan/PG-72804/2021 | EPI_ISL_3878620 | 2021-09-02      |
| hCoV-19/Japan/PG-72805/2021 | EPI_ISL_3878622 | 2021-09-02      |
| hCoV-19/Japan/PG-72806/2021 | EPI_ISL_3878624 | 2021-09-02      |
| hCoV-19/Japan/PG-72807/2021 | EPI_ISL_3878626 | 2021-09-02      |
| hCoV-19/Japan/PG-72808/2021 | EPI_ISL_3878627 | 2021-09-02      |
| hCoV-19/Japan/PG-72809/2021 | EPI_ISL_3878628 | 2021-09-02      |
| hCoV-19/Japan/PG-72810/2021 | EPI_ISL_3878630 | 2021-09-02      |
| hCoV-19/Japan/PG-72811/2021 | EPI_ISL_3878631 | 2021-09-02      |
| hCoV-19/Japan/PG-72813/2021 | EPI_ISL_3878633 | 2021-09-02      |
| hCoV-19/Japan/PG-72814/2021 | EPI_ISL_3878634 | 2021-09-02      |
| hCoV-19/Japan/PG-72815/2021 | EPI_ISL_3878635 | 2021-09-02      |
| hCoV-19/Japan/PG-72816/2021 | EPI_ISL_3878637 | 2021-09-02      |
| hCoV-19/Japan/PG-72817/2021 | EPI_ISL_3878638 | 2021-09-02      |
| hCoV-19/Japan/PG-72818/2021 | EPI_ISL_3878640 | 2021-09-02      |
| hCoV-19/Japan/PG-72819/2021 | EPI_ISL_3878642 | 2021-09-02      |
| hCoV-19/Japan/PG-72820/2021 | EPI_ISL_3878644 | 2021-09-02      |
| hCoV-19/Japan/PG-72821/2021 | EPI_ISL_3878646 | 2021-09-02      |
| hCoV-19/Japan/PG-72822/2021 | EPI_ISL_3878647 | 2021-09-02      |
| hCoV-19/Japan/PG-72823/2021 | EPI_ISL_3878649 | 2021-09-02      |
| hCoV-19/Japan/PG-72824/2021 | EPI_ISL_3878650 | 2021-09-02      |
| hCoV-19/Japan/PG-72825/2021 | EPI_ISL_3878652 | 2021-09-02      |
| hCoV-19/Japan/PG-72826/2021 | EPI_ISL_3878654 | 2021-09-02      |
| hCoV-19/Japan/PG-72827/2021 | EPI_ISL_3878655 | 2021-09-02      |
| hCoV-19/Japan/PG-72828/2021 | EPI_ISL_3878656 | 2021-09-02      |
| hCoV-19/Japan/PG-72829/2021 | EPI_ISL_3878658 | 2021-09-02      |
| hCoV-19/Japan/PG-72830/2021 | EPI_ISL_3878659 | 2021-09-02      |
| hCoV-19/Japan/PG-72831/2021 | EPI_ISL_3878661 | 2021-09-02      |
| hCoV-19/Japan/PG-72832/2021 | EPI_ISL_3878662 | 2021-09-02      |
| hCoV-19/Japan/PG-72833/2021 | EPI_ISL_3878664 | 2021-09-02      |
| hCoV-19/Japan/PG-72834/2021 | EPI_ISL_3878665 | 2021-09-02      |
| hCoV-19/Japan/PG-72835/2021 | EPI_ISL_3878666 | 2021-09-02      |
| hCoV-19/Japan/PG-72836/2021 | EPI_ISL_3878668 | 2021-09-02      |
| hCoV-19/Japan/PG-72837/2021 | EPI_ISL_3878669 | 2021-09-02      |
| hCoV-19/Japan/PG-72838/2021 | EPI_ISL_3878671 | 2021-09-02      |
| hCoV-19/Japan/PG-72839/2021 | EPI_ISL_3878673 | 2021-09-02      |
| hCoV-19/Japan/PG-72840/2021 | EPI_ISL_3878674 | 2021-09-02      |
| hCoV-19/Japan/PG-72841/2021 | EPI_ISL_3878676 | 2021-09-02      |
| hCoV-19/Japan/PG-72842/2021 | EPI_ISL_3878678 | 2021-09-02      |
| hCoV-19/Japan/PG-72843/2021 | EPI_ISL_3878680 | 2021-09-02      |
| hCoV-19/Japan/PG-72844/2021 | EPI_ISL_3878682 | 2021-09-02      |
| hCoV-19/Japan/PG-72845/2021 | EPI_ISL_3878684 | 2021-09-02      |
| hCoV-19/Japan/PG-72846/2021 | EPI_ISL_3878685 | 2021-09-02      |
| hCoV-19/Japan/PG-72847/2021 | EPI_ISL_3878687 | 2021-09-02      |

| virus_name                  | epiID           | submission_date |
|-----------------------------|-----------------|-----------------|
| hCoV-19/Japan/PG-72848/2021 | EPI_ISL_3878689 | 2021-09-02      |
| hCoV-19/Japan/PG-72849/2021 | EPI_ISL_3878691 | 2021-09-02      |
| hCoV-19/Japan/PG-72850/2021 | EPI_ISL_3878692 | 2021-09-02      |
| hCoV-19/Japan/PG-72851/2021 | EPI_ISL_3878693 | 2021-09-02      |
| hCoV-19/Japan/PG-72852/2021 | EPI_ISL_3878695 | 2021-09-02      |
| hCoV-19/Japan/PG-72853/2021 | EPI_ISL_3878697 | 2021-09-02      |
| hCoV-19/Japan/PG-72854/2021 | EPI_ISL_3878698 | 2021-09-02      |
| hCoV-19/Japan/PG-72855/2021 | EPI_ISL_3878700 | 2021-09-02      |
| hCoV-19/Japan/PG-72856/2021 | EPI_ISL_3878702 | 2021-09-02      |
| hCoV-19/Japan/PG-72857/2021 | EPI_ISL_3878703 | 2021-09-02      |
| hCoV-19/Japan/PG-72858/2021 | EPI_ISL_3878705 | 2021-09-02      |
| hCoV-19/Japan/PG-72859/2021 | EPI_ISL_3878707 | 2021-09-02      |
| hCoV-19/Japan/PG-72860/2021 | EPI_ISL_3878710 | 2021-09-02      |
| hCoV-19/Japan/PG-72861/2021 | EPI_ISL_3878711 | 2021-09-02      |
| hCoV-19/Japan/PG-72862/2021 | EPI_ISL_3878713 | 2021-09-02      |
| hCoV-19/Japan/PG-72863/2021 | EPI_ISL_3878715 | 2021-09-02      |
| hCoV-19/Japan/PG-72864/2021 | EPI_ISL_3878716 | 2021-09-02      |
| hCoV-19/Japan/PG-72865/2021 | EPI_ISL_3878718 | 2021-09-02      |
| hCoV-19/Japan/PG-72866/2021 | EPI_ISL_3878720 | 2021-09-02      |
| hCoV-19/Japan/PG-72867/2021 | EPI_ISL_3878722 | 2021-09-02      |
| hCoV-19/Japan/PG-72868/2021 | EPI_ISL_3878723 | 2021-09-02      |
| hCoV-19/Japan/PG-72869/2021 | EPI_ISL_3878725 | 2021-09-02      |
| hCoV-19/Japan/PG-72870/2021 | EPI_ISL_3878727 | 2021-09-02      |
| hCoV-19/Japan/PG-72871/2021 | EPI_ISL_3878729 | 2021-09-02      |
| hCoV-19/Japan/PG-72872/2021 | EPI_ISL_3878731 | 2021-09-02      |
| hCoV-19/Japan/PG-72873/2021 | EPI_ISL_3878733 | 2021-09-02      |
| hCoV-19/Japan/PG-72874/2021 | EPI_ISL_3878734 | 2021-09-02      |
| hCoV-19/Japan/PG-72875/2021 | EPI_ISL_3878736 | 2021-09-02      |
| hCoV-19/Japan/PG-72876/2021 | EPI_ISL_3878738 | 2021-09-02      |
| hCoV-19/Japan/PG-72877/2021 | EPI_ISL_3878740 | 2021-09-02      |
| hCoV-19/Japan/PG-72878/2021 | EPI_ISL_3878742 | 2021-09-02      |
| hCoV-19/Japan/PG-72879/2021 | EPI_ISL_3878745 | 2021-09-02      |
| hCoV-19/Japan/PG-72880/2021 | EPI_ISL_3878746 | 2021-09-02      |
| hCoV-19/Japan/PG-72881/2021 | EPI_ISL_3878748 | 2021-09-02      |
| hCoV-19/Japan/PG-72882/2021 | EPI_ISL_3878750 | 2021-09-02      |
| hCoV-19/Japan/PG-72883/2021 | EPI_ISL_3878752 | 2021-09-02      |
| hCoV-19/Japan/PG-72884/2021 | EPI_ISL_3878754 | 2021-09-02      |
| hCoV-19/Japan/PG-72885/2021 | EPI_ISL_3878756 | 2021-09-02      |
| hCoV-19/Japan/PG-72886/2021 | EPI_ISL_3878758 | 2021-09-02      |
| hCoV-19/Japan/PG-72887/2021 | EPI_ISL_3878760 | 2021-09-02      |
| hCoV-19/Japan/PG-72888/2021 | EPI_ISL_3878762 | 2021-09-02      |
| hCoV-19/Japan/PG-72889/2021 | EPI_ISL_3878763 | 2021-09-02      |
| hCoV-19/Japan/PG-72890/2021 | EPI_ISL_3878765 | 2021-09-02      |
| hCoV-19/Japan/PG-72891/2021 | EPI_ISL_3878766 | 2021-09-02      |
| hCoV-19/Japan/PG-72892/2021 | EPI_ISL_3878768 | 2021-09-02      |
| hCoV-19/Japan/PG-72893/2021 | EPI_ISL_3878769 | 2021-09-02      |
| hCoV-19/Japan/PG-72894/2021 | EPI_ISL_3878771 | 2021-09-02      |
| hCoV-19/Japan/PG-72895/2021 | EPI_ISL_3878773 | 2021-09-02      |
| hCoV-19/Japan/PG-72896/2021 | EPI_ISL_3878774 | 2021-09-02      |
| hCoV-19/Japan/PG-72897/2021 | EPI_ISL_3878775 | 2021-09-02      |
| hCoV-19/Japan/PG-72898/2021 | EPI_ISL_3878777 | 2021-09-02      |
| hCoV-19/Japan/PG-72899/2021 | EPI_ISL_3878778 | 2021-09-02      |
| hCoV-19/Japan/PG-72900/2021 | EPI_ISL_3878781 | 2021-09-02      |
| hCoV-19/Japan/PG-72901/2021 | EPI_ISL_3878783 | 2021-09-02      |

| virus_name                  | epiID           | submission_date |
|-----------------------------|-----------------|-----------------|
| hCoV-19/Japan/PG-72902/2021 | EPI_ISL_3878785 | 2021-09-02      |
| hCoV-19/Japan/PG-72903/2021 | EPI_ISL_3878786 | 2021-09-02      |
| hCoV-19/Japan/PG-72904/2021 | EPI_ISL_3878789 | 2021-09-02      |
| hCoV-19/Japan/PG-72905/2021 | EPI_ISL_3878791 | 2021-09-02      |
| hCoV-19/Japan/PG-72906/2021 | EPI_ISL_3878793 | 2021-09-02      |
| hCoV-19/Japan/PG-72907/2021 | EPI_ISL_3874264 | 2021-09-02      |
| hCoV-19/Japan/PG-72908/2021 | EPI_ISL_3874265 | 2021-09-02      |
| hCoV-19/Japan/PG-72909/2021 | EPI_ISL_3874266 | 2021-09-02      |
| hCoV-19/Japan/PG-72910/2021 | EPI_ISL_3874267 | 2021-09-02      |
| hCoV-19/Japan/PG-72911/2021 | EPI_ISL_3874268 | 2021-09-02      |
| hCoV-19/Japan/PG-72912/2021 | EPI_ISL_3874269 | 2021-09-02      |
| hCoV-19/Japan/PG-72913/2021 | EPI_ISL_3874270 | 2021-09-02      |
| hCoV-19/Japan/PG-72914/2021 | EPI_ISL_3874271 | 2021-09-02      |
| hCoV-19/Japan/PG-72915/2021 | EPI_ISL_3874272 | 2021-09-02      |
| hCoV-19/Japan/PG-72916/2021 | EPI_ISL_3874273 | 2021-09-02      |
| hCoV-19/Japan/PG-72917/2021 | EPI_ISL_3874274 | 2021-09-02      |
| hCoV-19/Japan/PG-72918/2021 | EPI_ISL_3874275 | 2021-09-02      |
| hCoV-19/Japan/PG-72919/2021 | EPI_ISL_3874276 | 2021-09-02      |
| hCoV-19/Japan/PG-72920/2021 | EPI_ISL_3874277 | 2021-09-02      |
| hCoV-19/Japan/PG-72921/2021 | EPI_ISL_3874278 | 2021-09-02      |
| hCoV-19/Japan/PG-72922/2021 | EPI_ISL_3874279 | 2021-09-02      |
| hCoV-19/Japan/PG-72923/2021 | EPI_ISL_3874280 | 2021-09-02      |
| hCoV-19/Japan/PG-72924/2021 | EPI_ISL_3874281 | 2021-09-02      |
| hCoV-19/Japan/PG-72925/2021 | EPI_ISL_3874282 | 2021-09-02      |
| hCoV-19/Japan/PG-72926/2021 | EPI_ISL_3878794 | 2021-09-02      |
| hCoV-19/Japan/PG-72927/2021 | EPI_ISL_3878797 | 2021-09-02      |
| hCoV-19/Japan/PG-72928/2021 | EPI_ISL_3878798 | 2021-09-02      |
| hCoV-19/Japan/PG-72929/2021 | EPI_ISL_3878801 | 2021-09-02      |
| hCoV-19/Japan/PG-72930/2021 | EPI_ISL_3878802 | 2021-09-02      |
| hCoV-19/Japan/PG-72931/2021 | EPI_ISL_3878804 | 2021-09-02      |
| hCoV-19/Japan/PG-72932/2021 | EPI_ISL_3878806 | 2021-09-02      |
| hCoV-19/Japan/PG-72933/2021 | EPI_ISL_3878808 | 2021-09-02      |
| hCoV-19/Japan/PG-72934/2021 | EPI_ISL_3878810 | 2021-09-02      |
| hCoV-19/Japan/PG-72935/2021 | EPI_ISL_3878812 | 2021-09-02      |
| hCoV-19/Japan/PG-72936/2021 | EPI_ISL_3878814 | 2021-09-02      |
| hCoV-19/Japan/PG-72937/2021 | EPI_ISL_3878816 | 2021-09-02      |
| hCoV-19/Japan/PG-72938/2021 | EPI_ISL_3878818 | 2021-09-02      |
| hCoV-19/Japan/PG-72939/2021 | EPI_ISL_3878819 | 2021-09-02      |
| hCoV-19/Japan/PG-72940/2021 | EPI_ISL_3878821 | 2021-09-02      |
| hCoV-19/Japan/PG-72941/2021 | EPI_ISL_3878823 | 2021-09-02      |
| hCoV-19/Japan/PG-72942/2021 | EPI_ISL_3878825 | 2021-09-02      |
| hCoV-19/Japan/PG-72943/2021 | EPI_ISL_3878827 | 2021-09-02      |
| hCoV-19/Japan/PG-72944/2021 | EPI_ISL_3878828 | 2021-09-02      |
| hCoV-19/Japan/PG-72945/2021 | EPI_ISL_3878831 | 2021-09-02      |
| hCoV-19/Japan/PG-72946/2021 | EPI_ISL_3878833 | 2021-09-02      |
| hCoV-19/Japan/PG-72947/2021 | EPI_ISL_3878835 | 2021-09-02      |
| hCoV-19/Japan/PG-72948/2021 | EPI_ISL_3878837 | 2021-09-02      |
| hCoV-19/Japan/PG-72949/2021 | EPI_ISL_3878839 | 2021-09-02      |
| hCoV-19/Japan/PG-72950/2021 | EPI_ISL_3878840 | 2021-09-02      |
| hCoV-19/Japan/PG-72951/2021 | EPI_ISL_3878843 | 2021-09-02      |
| hCoV-19/Japan/PG-72952/2021 | EPI_ISL_3878844 | 2021-09-02      |
| hCoV-19/Japan/PG-72953/2021 | EPI_ISL_3878846 | 2021-09-02      |
| hCoV-19/Japan/PG-72954/2021 | EPI_ISL_3878847 | 2021-09-02      |
| hCoV-19/Japan/PG-72955/2021 | EPI_ISL_3878849 | 2021-09-02      |

| virus_name                  | epiID           | submission_date |
|-----------------------------|-----------------|-----------------|
| hCoV-19/Japan/PG-72956/2021 | EPI_ISL_3878851 | 2021-09-02      |
| hCoV-19/Japan/PG-72957/2021 | EPI_ISL_3878852 | 2021-09-02      |
| hCoV-19/Japan/PG-72958/2021 | EPI_ISL_3878854 | 2021-09-02      |
| hCoV-19/Japan/PG-72959/2021 | EPI_ISL_3878856 | 2021-09-02      |
| hCoV-19/Japan/PG-72960/2021 | EPI_ISL_3878858 | 2021-09-02      |
| hCoV-19/Japan/PG-72961/2021 | EPI_ISL_3878860 | 2021-09-02      |
| hCoV-19/Japan/PG-72962/2021 | EPI_ISL_3878861 | 2021-09-02      |
| hCoV-19/Japan/PG-72963/2021 | EPI_ISL_3878863 | 2021-09-02      |
| hCoV-19/Japan/PG-72964/2021 | EPI_ISL_3878865 | 2021-09-02      |
| hCoV-19/Japan/PG-72965/2021 | EPI_ISL_3878867 | 2021-09-02      |
| hCoV-19/Japan/PG-72966/2021 | EPI_ISL_3878869 | 2021-09-02      |
| hCoV-19/Japan/PG-72967/2021 | EPI_ISL_3878872 | 2021-09-02      |
| hCoV-19/Japan/PG-72968/2021 | EPI_ISL_3878873 | 2021-09-02      |
| hCoV-19/Japan/PG-72969/2021 | EPI_ISL_3878875 | 2021-09-02      |
| hCoV-19/Japan/PG-72970/2021 | EPI_ISL_3878876 | 2021-09-02      |
| hCoV-19/Japan/PG-72971/2021 | EPI_ISL_3878878 | 2021-09-02      |
| hCoV-19/Japan/PG-72972/2021 | EPI_ISL_3878880 | 2021-09-02      |
| hCoV-19/Japan/PG-72973/2021 | EPI_ISL_3878881 | 2021-09-02      |
| hCoV-19/Japan/PG-72974/2021 | EPI_ISL_3878883 | 2021-09-02      |
| hCoV-19/Japan/PG-72975/2021 | EPI_ISL_3878884 | 2021-09-02      |
| hCoV-19/Japan/PG-72976/2021 | EPI_ISL_3878885 | 2021-09-02      |
| hCoV-19/Japan/PG-72977/2021 | EPI_ISL_3878887 | 2021-09-02      |
| hCoV-19/Japan/PG-72978/2021 | EPI_ISL_3878889 | 2021-09-02      |
| hCoV-19/Japan/PG-72979/2021 | EPI_ISL_3878890 | 2021-09-02      |
| hCoV-19/Japan/PG-72980/2021 | EPI_ISL_3878892 | 2021-09-02      |
| hCoV-19/Japan/PG-72981/2021 | EPI_ISL_3878893 | 2021-09-02      |
| hCoV-19/Japan/PG-72982/2021 | EPI_ISL_3878894 | 2021-09-02      |
| hCoV-19/Japan/PG-72983/2021 | EPI_ISL_3878895 | 2021-09-02      |
| hCoV-19/Japan/PG-72984/2021 | EPI_ISL_3878897 | 2021-09-02      |
| hCoV-19/Japan/PG-72985/2021 | EPI_ISL_3878898 | 2021-09-02      |
| hCoV-19/Japan/PG-72986/2021 | EPI_ISL_3878899 | 2021-09-02      |
| hCoV-19/Japan/PG-72987/2021 | EPI_ISL_3878901 | 2021-09-02      |
| hCoV-19/Japan/PG-72988/2021 | EPI_ISL_3878902 | 2021-09-02      |
| hCoV-19/Japan/PG-72989/2021 | EPI_ISL_3878903 | 2021-09-02      |
| hCoV-19/Japan/PG-72990/2021 | EPI_ISL_3878905 | 2021-09-02      |
| hCoV-19/Japan/PG-72991/2021 | EPI_ISL_3878906 | 2021-09-02      |
| hCoV-19/Japan/PG-72992/2021 | EPI_ISL_3878908 | 2021-09-02      |
| hCoV-19/Japan/PG-72993/2021 | EPI_ISL_3878909 | 2021-09-02      |
| hCoV-19/Japan/PG-72994/2021 | EPI_ISL_3878910 | 2021-09-02      |
| hCoV-19/Japan/PG-72995/2021 | EPI_ISL_3878912 | 2021-09-02      |
| hCoV-19/Japan/PG-72996/2021 | EPI_ISL_3878913 | 2021-09-02      |
| hCoV-19/Japan/PG-72997/2021 | EPI_ISL_3878915 | 2021-09-02      |
| hCoV-19/Japan/PG-72998/2021 | EPI_ISL_3878916 | 2021-09-02      |
| hCoV-19/Japan/PG-72999/2021 | EPI_ISL_3878917 | 2021-09-02      |
| hCoV-19/Japan/PG-73000/2021 | EPI_ISL_3878919 | 2021-09-02      |
| hCoV-19/Japan/PG-73001/2021 | EPI_ISL_3878920 | 2021-09-02      |
| hCoV-19/Japan/PG-73002/2021 | EPI_ISL_3878922 | 2021-09-02      |
| hCoV-19/Japan/PG-73003/2021 | EPI_ISL_3878923 | 2021-09-02      |
| hCoV-19/Japan/PG-73004/2021 | EPI_ISL_3878924 | 2021-09-02      |
| hCoV-19/Japan/PG-73005/2021 | EPI_ISL_3878926 | 2021-09-02      |
| hCoV-19/Japan/PG-73006/2021 | EPI_ISL_3878927 | 2021-09-02      |
| hCoV-19/Japan/PG-73007/2021 | EPI_ISL_3878929 | 2021-09-02      |
| hCoV-19/Japan/PG-73008/2021 | EPI_ISL_3878931 | 2021-09-02      |
| hCoV-19/Japan/PG-73009/2021 | EPI_ISL_3878933 | 2021-09-02      |

| virus_name                  | epiID           | submission_date |
|-----------------------------|-----------------|-----------------|
| hCoV-19/Japan/PG-73010/2021 | EPI_ISL_3878934 | 2021-09-02      |
| hCoV-19/Japan/PG-73011/2021 | EPI_ISL_3878936 | 2021-09-02      |
| hCoV-19/Japan/PG-73012/2021 | EPI_ISL_3878938 | 2021-09-02      |
| hCoV-19/Japan/PG-73013/2021 | EPI_ISL_3878939 | 2021-09-02      |
| hCoV-19/Japan/PG-73014/2021 | EPI_ISL_3878941 | 2021-09-02      |
| hCoV-19/Japan/PG-73015/2021 | EPI_ISL_3878944 | 2021-09-02      |
| hCoV-19/Japan/PG-73016/2021 | EPI_ISL_3878946 | 2021-09-02      |
| hCoV-19/Japan/PG-73017/2021 | EPI_ISL_3878947 | 2021-09-02      |
| hCoV-19/Japan/PG-73018/2021 | EPI_ISL_3878950 | 2021-09-02      |
| hCoV-19/Japan/PG-73019/2021 | EPI_ISL_3878952 | 2021-09-02      |
| hCoV-19/Japan/PG-73020/2021 | EPI_ISL_3878953 | 2021-09-02      |
| hCoV-19/Japan/PG-73021/2021 | EPI_ISL_3878955 | 2021-09-02      |
| hCoV-19/Japan/PG-73022/2021 | EPI_ISL_3878957 | 2021-09-02      |
| hCoV-19/Japan/PG-73023/2021 | EPI_ISL_3878959 | 2021-09-02      |
| hCoV-19/Japan/PG-73024/2021 | EPI_ISL_3878960 | 2021-09-02      |
| hCoV-19/Japan/PG-73025/2021 | EPI_ISL_3878963 | 2021-09-02      |
| hCoV-19/Japan/PG-73026/2021 | EPI_ISL_3878964 | 2021-09-02      |
| hCoV-19/Japan/PG-73027/2021 | EPI_ISL_3878966 | 2021-09-02      |
| hCoV-19/Japan/PG-73028/2021 | EPI_ISL_3878967 | 2021-09-02      |
| hCoV-19/Japan/PG-73029/2021 | EPI_ISL_3878969 | 2021-09-02      |
| hCoV-19/Japan/PG-73030/2021 | EPI_ISL_3878971 | 2021-09-02      |
| hCoV-19/Japan/PG-73031/2021 | EPI_ISL_3878973 | 2021-09-02      |
| hCoV-19/Japan/PG-73032/2021 | EPI_ISL_3878975 | 2021-09-02      |
| hCoV-19/Japan/PG-73033/2021 | EPI_ISL_3878977 | 2021-09-02      |
| hCoV-19/Japan/PG-73034/2021 | EPI_ISL_3878980 | 2021-09-02      |
| hCoV-19/Japan/PG-73035/2021 | EPI_ISL_3878981 | 2021-09-02      |
| hCoV-19/Japan/PG-73036/2021 | EPI_ISL_3878983 | 2021-09-02      |
| hCoV-19/Japan/PG-73037/2021 | EPI_ISL_3878985 | 2021-09-02      |
| hCoV-19/Japan/PG-73038/2021 | EPI_ISL_3878987 | 2021-09-02      |
| hCoV-19/Japan/PG-73039/2021 | EPI_ISL_3878990 | 2021-09-02      |
| hCoV-19/Japan/PG-73040/2021 | EPI_ISL_3878991 | 2021-09-02      |
| hCoV-19/Japan/PG-73041/2021 | EPI_ISL_3878993 | 2021-09-02      |
| hCoV-19/Japan/PG-73042/2021 | EPI_ISL_3878994 | 2021-09-02      |
| hCoV-19/Japan/PG-73043/2021 | EPI_ISL_3878996 | 2021-09-02      |
| hCoV-19/Japan/PG-73044/2021 | EPI_ISL_3878998 | 2021-09-02      |
| hCoV-19/Japan/PG-73045/2021 | EPI_ISL_3879000 | 2021-09-02      |
| hCoV-19/Japan/PG-73046/2021 | EPI_ISL_3879002 | 2021-09-02      |
| hCoV-19/Japan/PG-73047/2021 | EPI_ISL_3879003 | 2021-09-02      |
| hCoV-19/Japan/PG-73048/2021 | EPI_ISL_3879005 | 2021-09-02      |
| hCoV-19/Japan/PG-73049/2021 | EPI_ISL_3879007 | 2021-09-02      |
| hCoV-19/Japan/PG-73050/2021 | EPI_ISL_3879010 | 2021-09-02      |
| hCoV-19/Japan/PG-73051/2021 | EPI_ISL_3879013 | 2021-09-02      |
| hCoV-19/Japan/PG-73052/2021 | EPI_ISL_3879015 | 2021-09-02      |
| hCoV-19/Japan/PG-73053/2021 | EPI_ISL_3879017 | 2021-09-02      |
| hCoV-19/Japan/PG-73054/2021 | EPI_ISL_3879019 | 2021-09-02      |
| hCoV-19/Japan/PG-73055/2021 | EPI_ISL_3879021 | 2021-09-02      |
| hCoV-19/Japan/PG-73056/2021 | EPI_ISL_3879023 | 2021-09-02      |
| hCoV-19/Japan/PG-73057/2021 | EPI_ISL_3879025 | 2021-09-02      |
| hCoV-19/Japan/PG-73058/2021 | EPI_ISL_3879027 | 2021-09-02      |
| hCoV-19/Japan/PG-73059/2021 | EPI_ISL_3879028 | 2021-09-02      |
| hCoV-19/Japan/PG-73060/2021 | EPI_ISL_3879030 | 2021-09-02      |
| hCoV-19/Japan/PG-73061/2021 | EPI_ISL_3879031 | 2021-09-02      |
| hCoV-19/Japan/PG-73062/2021 | EPI_ISL_3879034 | 2021-09-02      |
| hCoV-19/Japan/PG-73063/2021 | EPI_ISL_3879036 | 2021-09-02      |

| virus_name                  | epiID           | submission_date |
|-----------------------------|-----------------|-----------------|
| hCoV-19/Japan/PG-73064/2021 | EPI_ISL_3879037 | 2021-09-02      |
| hCoV-19/Japan/PG-73065/2021 | EPI_ISL_3879039 | 2021-09-02      |
| hCoV-19/Japan/PG-73066/2021 | EPI_ISL_3879042 | 2021-09-02      |
| hCoV-19/Japan/PG-73067/2021 | EPI_ISL_3879044 | 2021-09-02      |
| hCoV-19/Japan/PG-73068/2021 | EPI_ISL_3879045 | 2021-09-02      |
| hCoV-19/Japan/PG-73069/2021 | EPI_ISL_3879047 | 2021-09-02      |
| hCoV-19/Japan/PG-73070/2021 | EPI_ISL_3879050 | 2021-09-02      |
| hCoV-19/Japan/PG-73071/2021 | EPI_ISL_3879052 | 2021-09-02      |
| hCoV-19/Japan/PG-73072/2021 | EPI_ISL_3879054 | 2021-09-02      |
| hCoV-19/Japan/PG-73073/2021 | EPI_ISL_3879056 | 2021-09-02      |
| hCoV-19/Japan/PG-73074/2021 | EPI_ISL_3879058 | 2021-09-02      |
| hCoV-19/Japan/PG-73075/2021 | EPI_ISL_3879059 | 2021-09-02      |
| hCoV-19/Japan/PG-73076/2021 | EPI_ISL_3879061 | 2021-09-02      |
| hCoV-19/Japan/PG-73077/2021 | EPI_ISL_3879063 | 2021-09-02      |
| hCoV-19/Japan/PG-73078/2021 | EPI_ISL_3879065 | 2021-09-02      |
| hCoV-19/Japan/PG-73079/2021 | EPI_ISL_3879067 | 2021-09-02      |
| hCoV-19/Japan/PG-73080/2021 | EPI_ISL_3879069 | 2021-09-02      |
| hCoV-19/Japan/PG-73081/2021 | EPI_ISL_3879071 | 2021-09-02      |
| hCoV-19/Japan/PG-73082/2021 | EPI_ISL_3879073 | 2021-09-02      |
| hCoV-19/Japan/PG-73083/2021 | EPI_ISL_3879075 | 2021-09-02      |
| hCoV-19/Japan/PG-73084/2021 | EPI_ISL_3879077 | 2021-09-02      |
| hCoV-19/Japan/PG-73085/2021 | EPI_ISL_3879079 | 2021-09-02      |
| hCoV-19/Japan/PG-73086/2021 | EPI_ISL_3879081 | 2021-09-02      |
| hCoV-19/Japan/PG-73087/2021 | EPI_ISL_3879083 | 2021-09-02      |
| hCoV-19/Japan/PG-73088/2021 | EPI_ISL_3879085 | 2021-09-02      |
| hCoV-19/Japan/PG-73089/2021 | EPI_ISL_3879087 | 2021-09-02      |
| hCoV-19/Japan/PG-73090/2021 | EPI_ISL_3879088 | 2021-09-02      |
| hCoV-19/Japan/PG-73091/2021 | EPI_ISL_3879090 | 2021-09-02      |
| hCoV-19/Japan/PG-73092/2021 | EPI_ISL_3879092 | 2021-09-02      |
| hCoV-19/Japan/PG-73093/2021 | EPI_ISL_3879094 | 2021-09-02      |
| hCoV-19/Japan/PG-73094/2021 | EPI_ISL_3879096 | 2021-09-02      |
| hCoV-19/Japan/PG-73095/2021 | EPI_ISL_3879098 | 2021-09-02      |
| hCoV-19/Japan/PG-73096/2021 | EPI_ISL_3879100 | 2021-09-02      |
| hCoV-19/Japan/PG-73097/2021 | EPI_ISL_3879102 | 2021-09-02      |
| hCoV-19/Japan/PG-73098/2021 | EPI_ISL_3879105 | 2021-09-02      |
| hCoV-19/Japan/PG-73099/2021 | EPI_ISL_3879107 | 2021-09-02      |
| hCoV-19/Japan/PG-73100/2021 | EPI_ISL_3879110 | 2021-09-02      |
| hCoV-19/Japan/PG-73101/2021 | EPI_ISL_3879112 | 2021-09-02      |
| hCoV-19/Japan/PG-73102/2021 | EPI_ISL_3879114 | 2021-09-02      |
| hCoV-19/Japan/PG-73103/2021 | EPI_ISL_3879115 | 2021-09-02      |
| hCoV-19/Japan/PG-73104/2021 | EPI_ISL_3879118 | 2021-09-02      |
| hCoV-19/Japan/PG-73105/2021 | EPI_ISL_3879120 | 2021-09-02      |
| hCoV-19/Japan/PG-73106/2021 | EPI_ISL_3879122 | 2021-09-02      |
| hCoV-19/Japan/PG-73107/2021 | EPI_ISL_3879125 | 2021-09-02      |
| hCoV-19/Japan/PG-73108/2021 | EPI_ISL_3879128 | 2021-09-02      |
| hCoV-19/Japan/PG-73109/2021 | EPI_ISL_3879129 | 2021-09-02      |
| hCoV-19/Japan/PG-73110/2021 | EPI_ISL_3879132 | 2021-09-02      |
| hCoV-19/Japan/PG-73111/2021 | EPI_ISL_3879134 | 2021-09-02      |
| hCoV-19/Japan/PG-73112/2021 | EPI_ISL_3879137 | 2021-09-02      |
| hCoV-19/Japan/PG-73113/2021 | EPI_ISL_3879139 | 2021-09-02      |
| hCoV-19/Japan/PG-73114/2021 | EPI_ISL_3879142 | 2021-09-02      |
| hCoV-19/Japan/PG-73115/2021 | EPI_ISL_3879144 | 2021-09-02      |
| hCoV-19/Japan/PG-73116/2021 | EPI_ISL_3879146 | 2021-09-02      |
| hCoV-19/Japan/PG-73117/2021 | EPI_ISL_3879148 | 2021-09-02      |

| virus_name                  | epiID           | submission_date |
|-----------------------------|-----------------|-----------------|
| hCoV-19/Japan/PG-73118/2021 | EPI_ISL_3879151 | 2021-09-02      |
| hCoV-19/Japan/PG-73119/2021 | EPI_ISL_3879152 | 2021-09-02      |
| hCoV-19/Japan/PG-73120/2021 | EPI_ISL_3879154 | 2021-09-02      |
| hCoV-19/Japan/PG-73121/2021 | EPI_ISL_3879156 | 2021-09-02      |
| hCoV-19/Japan/PG-73122/2021 | EPI_ISL_3879159 | 2021-09-02      |
| hCoV-19/Japan/PG-73123/2021 | EPI_ISL_3879161 | 2021-09-02      |
| hCoV-19/Japan/PG-73124/2021 | EPI_ISL_3879163 | 2021-09-02      |
| hCoV-19/Japan/PG-73125/2021 | EPI_ISL_3879164 | 2021-09-02      |
| hCoV-19/Japan/PG-73126/2021 | EPI_ISL_3879167 | 2021-09-02      |
| hCoV-19/Japan/PG-73127/2021 | EPI_ISL_3879168 | 2021-09-02      |
| hCoV-19/Japan/PG-73128/2021 | EPI_ISL_3879171 | 2021-09-02      |
| hCoV-19/Japan/PG-73129/2021 | EPI_ISL_3879173 | 2021-09-02      |
| hCoV-19/Japan/PG-73130/2021 | EPI_ISL_3879176 | 2021-09-02      |
| hCoV-19/Japan/PG-73131/2021 | EPI_ISL_3879178 | 2021-09-02      |
| hCoV-19/Japan/PG-73132/2021 | EPI_ISL_3879180 | 2021-09-02      |
| hCoV-19/Japan/PG-73133/2021 | EPI_ISL_3879182 | 2021-09-02      |
| hCoV-19/Japan/PG-73134/2021 | EPI_ISL_3879184 | 2021-09-02      |
| hCoV-19/Japan/PG-73135/2021 | EPI_ISL_3879186 | 2021-09-02      |
| hCoV-19/Japan/PG-73136/2021 | EPI_ISL_3879188 | 2021-09-02      |
| hCoV-19/Japan/PG-73137/2021 | EPI_ISL_3879190 | 2021-09-02      |
| hCoV-19/Japan/PG-73138/2021 | EPI_ISL_3879192 | 2021-09-02      |
| hCoV-19/Japan/PG-73139/2021 | EPI_ISL_3879194 | 2021-09-02      |
| hCoV-19/Japan/PG-73140/2021 | EPI_ISL_3879196 | 2021-09-02      |
| hCoV-19/Japan/PG-73141/2021 | EPI_ISL_3879198 | 2021-09-02      |
| hCoV-19/Japan/PG-73142/2021 | EPI_ISL_3879200 | 2021-09-02      |
| hCoV-19/Japan/PG-73143/2021 | EPI_ISL_3879202 | 2021-09-02      |
| hCoV-19/Japan/PG-73144/2021 | EPI_ISL_3879205 | 2021-09-02      |
| hCoV-19/Japan/PG-73145/2021 | EPI_ISL_3879208 | 2021-09-02      |
| hCoV-19/Japan/PG-73146/2021 | EPI_ISL_3879210 | 2021-09-02      |
| hCoV-19/Japan/PG-73147/2021 | EPI_ISL_3879212 | 2021-09-02      |
| hCoV-19/Japan/PG-73148/2021 | EPI_ISL_3879213 | 2021-09-02      |
| hCoV-19/Japan/PG-73149/2021 | EPI_ISL_3879214 | 2021-09-02      |
| hCoV-19/Japan/PG-73150/2021 | EPI_ISL_3879215 | 2021-09-02      |
| hCoV-19/Japan/PG-73151/2021 | EPI_ISL_3879216 | 2021-09-02      |
| hCoV-19/Japan/PG-73152/2021 | EPI_ISL_3879217 | 2021-09-02      |
| hCoV-19/Japan/PG-73153/2021 | EPI_ISL_3879219 | 2021-09-02      |
| hCoV-19/Japan/PG-73154/2021 | EPI_ISL_3879221 | 2021-09-02      |
| hCoV-19/Japan/PG-73155/2021 | EPI_ISL_3879223 | 2021-09-02      |
| hCoV-19/Japan/PG-73156/2021 | EPI_ISL_3879225 | 2021-09-02      |
| hCoV-19/Japan/PG-73157/2021 | EPI_ISL_3879227 | 2021-09-02      |
| hCoV-19/Japan/PG-73158/2021 | EPI_ISL_3879229 | 2021-09-02      |
| hCoV-19/Japan/PG-73159/2021 | EPI_ISL_3879231 | 2021-09-02      |
| hCoV-19/Japan/PG-73160/2021 | EPI_ISL_3879233 | 2021-09-02      |
| hCoV-19/Japan/PG-73161/2021 | EPI_ISL_3879236 | 2021-09-02      |
| hCoV-19/Japan/PG-73162/2021 | EPI_ISL_3879238 | 2021-09-02      |
| hCoV-19/Japan/PG-73163/2021 | EPI_ISL_3879240 | 2021-09-02      |
| hCoV-19/Japan/PG-73164/2021 | EPI_ISL_3879241 | 2021-09-02      |
| hCoV-19/Japan/PG-73165/2021 | EPI_ISL_3879244 | 2021-09-02      |
| hCoV-19/Japan/PG-73166/2021 | EPI_ISL_3879246 | 2021-09-02      |
| hCoV-19/Japan/PG-73167/2021 | EPI_ISL_3879248 | 2021-09-02      |
| hCoV-19/Japan/PG-73168/2021 | EPI_ISL_3879251 | 2021-09-02      |
| hCoV-19/Japan/PG-73169/2021 | EPI_ISL_3879253 | 2021-09-02      |
| hCoV-19/Japan/PG-73170/2021 | EPI_ISL_3879255 | 2021-09-02      |
| hCoV-19/Japan/PG-73171/2021 | EPI_ISL_3879257 | 2021-09-02      |

| virus_name                  | epiID           | submission_date |
|-----------------------------|-----------------|-----------------|
| hCoV-19/Japan/PG-73172/2021 | EPI_ISL_3879259 | 2021-09-02      |
| hCoV-19/Japan/PG-73173/2021 | EPI_ISL_3879262 | 2021-09-02      |
| hCoV-19/Japan/PG-73174/2021 | EPI_ISL_3879265 | 2021-09-02      |
| hCoV-19/Japan/PG-73175/2021 | EPI_ISL_3879267 | 2021-09-02      |
| hCoV-19/Japan/PG-73176/2021 | EPI_ISL_3879269 | 2021-09-02      |
| hCoV-19/Japan/PG-73177/2021 | EPI_ISL_3879271 | 2021-09-02      |
| hCoV-19/Japan/PG-73178/2021 | EPI_ISL_3879273 | 2021-09-02      |
| hCoV-19/Japan/PG-73179/2021 | EPI_ISL_3879276 | 2021-09-02      |
| hCoV-19/Japan/PG-73180/2021 | EPI_ISL_3879278 | 2021-09-02      |
| hCoV-19/Japan/PG-73181/2021 | EPI_ISL_3879280 | 2021-09-02      |
| hCoV-19/Japan/PG-73182/2021 | EPI_ISL_3879282 | 2021-09-02      |
| hCoV-19/Japan/PG-73183/2021 | EPI_ISL_3879284 | 2021-09-02      |
| hCoV-19/Japan/PG-73184/2021 | EPI_ISL_3879287 | 2021-09-02      |
| hCoV-19/Japan/PG-73185/2021 | EPI_ISL_3879289 | 2021-09-02      |
| hCoV-19/Japan/PG-73186/2021 | EPI_ISL_3879291 | 2021-09-02      |
| hCoV-19/Japan/PG-73187/2021 | EPI_ISL_3879294 | 2021-09-02      |
| hCoV-19/Japan/PG-73188/2021 | EPI_ISL_3879296 | 2021-09-02      |
| hCoV-19/Japan/PG-73189/2021 | EPI_ISL_3873558 | 2021-09-02      |
| hCoV-19/Japan/PG-73190/2021 | EPI_ISL_3873559 | 2021-09-02      |
| hCoV-19/Japan/PG-73191/2021 | EPI_ISL_3873560 | 2021-09-02      |
| hCoV-19/Japan/PG-73192/2021 | EPI_ISL_3873561 | 2021-09-02      |
| hCoV-19/Japan/PG-73193/2021 | EPI_ISL_3873562 | 2021-09-02      |
| hCoV-19/Japan/PG-73194/2021 | EPI_ISL_3873563 | 2021-09-02      |
| hCoV-19/Japan/PG-73195/2021 | EPI_ISL_3873564 | 2021-09-02      |
| hCoV-19/Japan/PG-73196/2021 | EPI_ISL_3873565 | 2021-09-02      |
| hCoV-19/Japan/PG-73197/2021 | EPI_ISL_3873566 | 2021-09-02      |
| hCoV-19/Japan/PG-73198/2021 | EPI_ISL_3873567 | 2021-09-02      |
| hCoV-19/Japan/PG-73199/2021 | EPI_ISL_3873568 | 2021-09-02      |
| hCoV-19/Japan/PG-73200/2021 | EPI_ISL_3873569 | 2021-09-02      |
| hCoV-19/Japan/PG-73201/2021 | EPI_ISL_3873570 | 2021-09-02      |
| hCoV-19/Japan/PG-73202/2021 | EPI_ISL_3873571 | 2021-09-02      |
| hCoV-19/Japan/PG-73203/2021 | EPI_ISL_3873572 | 2021-09-02      |
| hCoV-19/Japan/PG-73204/2021 | EPI_ISL_3873573 | 2021-09-02      |
| hCoV-19/Japan/PG-73205/2021 | EPI_ISL_3873574 | 2021-09-02      |
| hCoV-19/Japan/PG-73206/2021 | EPI_ISL_3873575 | 2021-09-02      |
| hCoV-19/Japan/PG-73207/2021 | EPI_ISL_3873576 | 2021-09-02      |
| hCoV-19/Japan/PG-73208/2021 | EPI_ISL_3873577 | 2021-09-02      |
| hCoV-19/Japan/PG-73209/2021 | EPI_ISL_3873578 | 2021-09-02      |
| hCoV-19/Japan/PG-73210/2021 | EPI_ISL_3873579 | 2021-09-02      |
| hCoV-19/Japan/PG-73211/2021 | EPI_ISL_3873580 | 2021-09-02      |
| hCoV-19/Japan/PG-73212/2021 | EPI_ISL_3873581 | 2021-09-02      |
| hCoV-19/Japan/PG-73213/2021 | EPI_ISL_3873582 | 2021-09-02      |
| hCoV-19/Japan/PG-73214/2021 | EPI_ISL_3873583 | 2021-09-02      |
| hCoV-19/Japan/PG-73215/2021 | EPI_ISL_3873584 | 2021-09-02      |
| hCoV-19/Japan/PG-73216/2021 | EPI_ISL_3872580 | 2021-09-02      |
| hCoV-19/Japan/PG-73217/2021 | EPI_ISL_3872581 | 2021-09-02      |
| hCoV-19/Japan/PG-73218/2021 | EPI_ISL_3872582 | 2021-09-02      |
| hCoV-19/Japan/PG-73219/2021 | EPI_ISL_3872583 | 2021-09-02      |
| hCoV-19/Japan/PG-73220/2021 | EPI_ISL_3872584 | 2021-09-02      |
| hCoV-19/Japan/PG-73221/2021 | EPI_ISL_3872585 | 2021-09-02      |
| hCoV-19/Japan/PG-73222/2021 | EPI_ISL_3872586 | 2021-09-02      |
| hCoV-19/Japan/PG-73223/2021 | EPI_ISL_3872587 | 2021-09-02      |
| hCoV-19/Japan/PG-73224/2021 | EPI_ISL_3872588 | 2021-09-02      |
| hCoV-19/Japan/PG-73225/2021 | EPI_ISL_3872589 | 2021-09-02      |



| virus_name                  | epiID           | submission_date |
|-----------------------------|-----------------|-----------------|
| hCoV-19/Japan/PG-73226/2021 | EPI_ISL_3872590 | 2021-09-02      |
| hCoV-19/Japan/PG-73227/2021 | EPI_ISL_3872591 | 2021-09-02      |
| hCoV-19/Japan/PG-73228/2021 | EPI_ISL_3872592 | 2021-09-02      |
| hCoV-19/Japan/PG-73229/2021 | EPI_ISL_3872593 | 2021-09-02      |
| hCoV-19/Japan/PG-73230/2021 | EPI_ISL_3872594 | 2021-09-02      |
| hCoV-19/Japan/PG-73231/2021 | EPI_ISL_3872595 | 2021-09-02      |
| hCoV-19/Japan/PG-73232/2021 | EPI_ISL_3872596 | 2021-09-02      |
| hCoV-19/Japan/PG-73233/2021 | EPI_ISL_3872597 | 2021-09-02      |
| hCoV-19/Japan/PG-73234/2021 | EPI_ISL_3872598 | 2021-09-02      |
| hCoV-19/Japan/PG-73235/2021 | EPI_ISL_3872599 | 2021-09-02      |
| hCoV-19/Japan/PG-73236/2021 | EPI_ISL_3872600 | 2021-09-02      |
| hCoV-19/Japan/PG-73237/2021 | EPI_ISL_3872601 | 2021-09-02      |
| hCoV-19/Japan/PG-73238/2021 | EPI_ISL_3872602 | 2021-09-02      |
| hCoV-19/Japan/PG-73239/2021 | EPI_ISL_3872603 | 2021-09-02      |
| hCoV-19/Japan/PG-73240/2021 | EPI_ISL_3872604 | 2021-09-02      |
| hCoV-19/Japan/PG-73241/2021 | EPI_ISL_3872605 | 2021-09-02      |
| hCoV-19/Japan/PG-73242/2021 | EPI_ISL_3872606 | 2021-09-02      |
| hCoV-19/Japan/PG-73243/2021 | EPI_ISL_3872607 | 2021-09-02      |
| hCoV-19/Japan/PG-73244/2021 | EPI_ISL_3872608 | 2021-09-02      |
| hCoV-19/Japan/PG-73245/2021 | EPI_ISL_3872609 | 2021-09-02      |
| hCoV-19/Japan/PG-73246/2021 | EPI_ISL_3872610 | 2021-09-02      |
| hCoV-19/Japan/PG-73247/2021 | EPI_ISL_3872611 | 2021-09-02      |
| hCoV-19/Japan/PG-73248/2021 | EPI_ISL_3872612 | 2021-09-02      |
| hCoV-19/Japan/PG-73249/2021 | EPI_ISL_3872613 | 2021-09-02      |
| hCoV-19/Japan/PG-73250/2021 | EPI_ISL_3872614 | 2021-09-02      |
| hCoV-19/Japan/PG-73251/2021 | EPI_ISL_3872615 | 2021-09-02      |
| hCoV-19/Japan/PG-73252/2021 | EPI_ISL_3872616 | 2021-09-02      |
| hCoV-19/Japan/PG-73253/2021 | EPI_ISL_3872617 | 2021-09-02      |
| hCoV-19/Japan/PG-73254/2021 | EPI_ISL_3872618 | 2021-09-02      |
| hCoV-19/Japan/PG-73255/2021 | EPI_ISL_3872619 | 2021-09-02      |
| hCoV-19/Japan/PG-73256/2021 | EPI_ISL_3872620 | 2021-09-02      |
| hCoV-19/Japan/PG-73257/2021 | EPI_ISL_3872621 | 2021-09-02      |
| hCoV-19/Japan/PG-73258/2021 | EPI_ISL_3872622 | 2021-09-02      |
| hCoV-19/Japan/PG-73259/2021 | EPI_ISL_3872623 | 2021-09-02      |
| hCoV-19/Japan/PG-73260/2021 | EPI_ISL_3872624 | 2021-09-02      |
| hCoV-19/Japan/PG-73261/2021 | EPI_ISL_3872625 | 2021-09-02      |
| hCoV-19/Japan/PG-73262/2021 | EPI_ISL_3872626 | 2021-09-02      |
| hCoV-19/Japan/PG-73263/2021 | EPI_ISL_3872627 | 2021-09-02      |
| hCoV-19/Japan/PG-73264/2021 | EPI_ISL_3872628 | 2021-09-02      |
| hCoV-19/Japan/PG-73265/2021 | EPI_ISL_3872629 | 2021-09-02      |
| hCoV-19/Japan/PG-73266/2021 | EPI_ISL_3872630 | 2021-09-02      |
| hCoV-19/Japan/PG-73267/2021 | EPI_ISL_3872631 | 2021-09-02      |
| hCoV-19/Japan/PG-73268/2021 | EPI_ISL_3879298 | 2021-09-02      |
| hCoV-19/Japan/PG-73269/2021 | EPI_ISL_3879300 | 2021-09-02      |
| hCoV-19/Japan/PG-73270/2021 | EPI_ISL_3879303 | 2021-09-02      |
| hCoV-19/Japan/PG-73271/2021 | EPI_ISL_3879305 | 2021-09-02      |
| hCoV-19/Japan/PG-73272/2021 | EPI_ISL_3879307 | 2021-09-02      |
| hCoV-19/Japan/PG-73273/2021 | EPI_ISL_3879308 | 2021-09-02      |
| hCoV-19/Japan/PG-73274/2021 | EPI_ISL_3879311 | 2021-09-02      |
| hCoV-19/Japan/PG-73275/2021 | EPI_ISL_3879312 | 2021-09-02      |
| hCoV-19/Japan/PG-73276/2021 | EPI_ISL_3879313 | 2021-09-02      |
| hCoV-19/Japan/PG-73277/2021 | EPI_ISL_3879316 | 2021-09-02      |
| hCoV-19/Japan/PG-73278/2021 | EPI_ISL_3879318 | 2021-09-02      |
| hCoV-19/Japan/PG-73279/2021 | EPI_ISL_3879321 | 2021-09-02      |

| virus_name                  | epiID           | submission_date |
|-----------------------------|-----------------|-----------------|
| hCoV-19/Japan/PG-73280/2021 | EPI_ISL_3879324 | 2021-09-02      |
| hCoV-19/Japan/PG-73281/2021 | EPI_ISL_3879327 | 2021-09-02      |
| hCoV-19/Japan/PG-73282/2021 | EPI_ISL_3879330 | 2021-09-02      |
| hCoV-19/Japan/PG-73283/2021 | EPI_ISL_3879332 | 2021-09-02      |
| hCoV-19/Japan/PG-73284/2021 | EPI_ISL_3879335 | 2021-09-02      |
| hCoV-19/Japan/PG-73285/2021 | EPI_ISL_3879337 | 2021-09-02      |
| hCoV-19/Japan/PG-73286/2021 | EPI_ISL_3879339 | 2021-09-02      |
| hCoV-19/Japan/PG-73287/2021 | EPI_ISL_3879342 | 2021-09-02      |
| hCoV-19/Japan/PG-73288/2021 | EPI_ISL_3879345 | 2021-09-02      |
| hCoV-19/Japan/PG-73289/2021 | EPI_ISL_3879348 | 2021-09-02      |
| hCoV-19/Japan/PG-73290/2021 | EPI_ISL_3879350 | 2021-09-02      |
| hCoV-19/Japan/PG-73291/2021 | EPI_ISL_3879353 | 2021-09-02      |
| hCoV-19/Japan/PG-73292/2021 | EPI_ISL_3879355 | 2021-09-02      |
| hCoV-19/Japan/PG-73293/2021 | EPI_ISL_3879357 | 2021-09-02      |
| hCoV-19/Japan/PG-73294/2021 | EPI_ISL_3879359 | 2021-09-02      |
| hCoV-19/Japan/PG-73295/2021 | EPI_ISL_3879362 | 2021-09-02      |
| hCoV-19/Japan/PG-73296/2021 | EPI_ISL_3879363 | 2021-09-02      |
| hCoV-19/Japan/PG-73297/2021 | EPI_ISL_3879365 | 2021-09-02      |
| hCoV-19/Japan/PG-73298/2021 | EPI_ISL_3879367 | 2021-09-02      |
| hCoV-19/Japan/PG-73299/2021 | EPI_ISL_3879370 | 2021-09-02      |
| hCoV-19/Japan/PG-73300/2021 | EPI_ISL_3879372 | 2021-09-02      |
| hCoV-19/Japan/PG-73301/2021 | EPI_ISL_3879374 | 2021-09-02      |
| hCoV-19/Japan/PG-73302/2021 | EPI_ISL_3879376 | 2021-09-02      |
| hCoV-19/Japan/PG-73303/2021 | EPI_ISL_3879379 | 2021-09-02      |
| hCoV-19/Japan/PG-73304/2021 | EPI_ISL_3879382 | 2021-09-02      |
| hCoV-19/Japan/PG-73305/2021 | EPI_ISL_3879384 | 2021-09-02      |
| hCoV-19/Japan/PG-73306/2021 | EPI_ISL_3879386 | 2021-09-02      |
| hCoV-19/Japan/PG-73307/2021 | EPI_ISL_3879389 | 2021-09-02      |
| hCoV-19/Japan/PG-73308/2021 | EPI_ISL_3879391 | 2021-09-02      |
| hCoV-19/Japan/PG-73309/2021 | EPI_ISL_3879394 | 2021-09-02      |
| hCoV-19/Japan/PG-73310/2021 | EPI_ISL_3879396 | 2021-09-02      |
| hCoV-19/Japan/PG-73311/2021 | EPI_ISL_3879398 | 2021-09-02      |
| hCoV-19/Japan/PG-73312/2021 | EPI_ISL_3879400 | 2021-09-02      |
| hCoV-19/Japan/PG-73313/2021 | EPI_ISL_3879403 | 2021-09-02      |
| hCoV-19/Japan/PG-73314/2021 | EPI_ISL_3879405 | 2021-09-02      |
| hCoV-19/Japan/PG-73315/2021 | EPI_ISL_3879407 | 2021-09-02      |
| hCoV-19/Japan/PG-73316/2021 | EPI_ISL_3879410 | 2021-09-02      |
| hCoV-19/Japan/PG-73317/2021 | EPI_ISL_3879412 | 2021-09-02      |
| hCoV-19/Japan/PG-73318/2021 | EPI_ISL_3879415 | 2021-09-02      |
| hCoV-19/Japan/PG-73319/2021 | EPI_ISL_3879417 | 2021-09-02      |
| hCoV-19/Japan/PG-73320/2021 | EPI_ISL_3879419 | 2021-09-02      |
| hCoV-19/Japan/PG-73321/2021 | EPI_ISL_3879420 | 2021-09-02      |
| hCoV-19/Japan/PG-73322/2021 | EPI_ISL_3879422 | 2021-09-02      |
| hCoV-19/Japan/PG-73323/2021 | EPI_ISL_3879424 | 2021-09-02      |
| hCoV-19/Japan/PG-73324/2021 | EPI_ISL_3879426 | 2021-09-02      |
| hCoV-19/Japan/PG-73325/2021 | EPI_ISL_3879428 | 2021-09-02      |
| hCoV-19/Japan/PG-73326/2021 | EPI_ISL_3879430 | 2021-09-02      |
| hCoV-19/Japan/PG-73327/2021 | EPI_ISL_3879432 | 2021-09-02      |
| hCoV-19/Japan/PG-73328/2021 | EPI_ISL_3879436 | 2021-09-02      |
| hCoV-19/Japan/PG-73329/2021 | EPI_ISL_3879437 | 2021-09-02      |
| hCoV-19/Japan/PG-73330/2021 | EPI_ISL_3879439 | 2021-09-02      |
| hCoV-19/Japan/PG-73331/2021 | EPI_ISL_3879441 | 2021-09-02      |
| hCoV-19/Japan/PG-73332/2021 | EPI_ISL_3879444 | 2021-09-02      |
| hCoV-19/Japan/PG-73333/2021 | EPI_ISL_3879446 | 2021-09-02      |

| virus_name                  | epiID           | submission_date |
|-----------------------------|-----------------|-----------------|
| hCoV-19/Japan/PG-73334/2021 | EPI_ISL_3879448 | 2021-09-02      |
| hCoV-19/Japan/PG-73335/2021 | EPI_ISL_3879450 | 2021-09-02      |
| hCoV-19/Japan/PG-73336/2021 | EPI_ISL_3879452 | 2021-09-02      |
| hCoV-19/Japan/PG-73337/2021 | EPI_ISL_3879454 | 2021-09-02      |
| hCoV-19/Japan/PG-73338/2021 | EPI_ISL_3879457 | 2021-09-02      |
| hCoV-19/Japan/PG-73339/2021 | EPI_ISL_3879459 | 2021-09-02      |
| hCoV-19/Japan/PG-73340/2021 | EPI_ISL_3879461 | 2021-09-02      |
| hCoV-19/Japan/PG-73341/2021 | EPI_ISL_3879463 | 2021-09-02      |
| hCoV-19/Japan/PG-73342/2021 | EPI_ISL_3879465 | 2021-09-02      |
| hCoV-19/Japan/PG-73343/2021 | EPI_ISL_3879467 | 2021-09-02      |
| hCoV-19/Japan/PG-73344/2021 | EPI_ISL_3879469 | 2021-09-02      |
| hCoV-19/Japan/PG-73345/2021 | EPI_ISL_3879471 | 2021-09-02      |
| hCoV-19/Japan/PG-73346/2021 | EPI_ISL_3879473 | 2021-09-02      |
| hCoV-19/Japan/PG-73347/2021 | EPI_ISL_3879476 | 2021-09-02      |
| hCoV-19/Japan/PG-73348/2021 | EPI_ISL_3879478 | 2021-09-02      |
| hCoV-19/Japan/PG-73349/2021 | EPI_ISL_3879480 | 2021-09-02      |
| hCoV-19/Japan/PG-73350/2021 | EPI_ISL_3879482 | 2021-09-02      |
| hCoV-19/Japan/PG-73351/2021 | EPI_ISL_3879484 | 2021-09-02      |
| hCoV-19/Japan/PG-73352/2021 | EPI_ISL_3879486 | 2021-09-02      |
| hCoV-19/Japan/PG-73353/2021 | EPI_ISL_3879489 | 2021-09-02      |
| hCoV-19/Japan/PG-73354/2021 | EPI_ISL_3879491 | 2021-09-02      |
| hCoV-19/Japan/PG-73355/2021 | EPI_ISL_3879494 | 2021-09-02      |
| hCoV-19/Japan/PG-73356/2021 | EPI_ISL_3879497 | 2021-09-02      |
| hCoV-19/Japan/PG-73357/2021 | EPI_ISL_3879499 | 2021-09-02      |
| hCoV-19/Japan/PG-73358/2021 | EPI_ISL_3879501 | 2021-09-02      |
| hCoV-19/Japan/PG-73359/2021 | EPI_ISL_3879504 | 2021-09-02      |
| hCoV-19/Japan/PG-73360/2021 | EPI_ISL_3879506 | 2021-09-02      |
| hCoV-19/Japan/PG-73361/2021 | EPI_ISL_3879507 | 2021-09-02      |
| hCoV-19/Japan/PG-73362/2021 | EPI_ISL_3879509 | 2021-09-02      |
| hCoV-19/Japan/PG-73363/2021 | EPI_ISL_3879512 | 2021-09-02      |
| hCoV-19/Japan/PG-73364/2021 | EPI_ISL_3879514 | 2021-09-02      |
| hCoV-19/Japan/PG-73365/2021 | EPI_ISL_3879516 | 2021-09-02      |
| hCoV-19/Japan/PG-73366/2021 | EPI_ISL_3879518 | 2021-09-02      |
| hCoV-19/Japan/PG-73367/2021 | EPI_ISL_3879521 | 2021-09-02      |
| hCoV-19/Japan/PG-73368/2021 | EPI_ISL_3879522 | 2021-09-02      |
| hCoV-19/Japan/PG-73369/2021 | EPI_ISL_3879523 | 2021-09-02      |
| hCoV-19/Japan/PG-73370/2021 | EPI_ISL_3879525 | 2021-09-02      |
| hCoV-19/Japan/PG-73371/2021 | EPI_ISL_3879527 | 2021-09-02      |
| hCoV-19/Japan/PG-73372/2021 | EPI_ISL_3879530 | 2021-09-02      |
| hCoV-19/Japan/PG-73373/2021 | EPI_ISL_3879532 | 2021-09-02      |
| hCoV-19/Japan/PG-73374/2021 | EPI_ISL_3879535 | 2021-09-02      |
| hCoV-19/Japan/PG-73375/2021 | EPI_ISL_3879537 | 2021-09-02      |
| hCoV-19/Japan/PG-73376/2021 | EPI_ISL_3879540 | 2021-09-02      |
| hCoV-19/Japan/PG-73377/2021 | EPI_ISL_3879542 | 2021-09-02      |
| hCoV-19/Japan/PG-73378/2021 | EPI_ISL_3879544 | 2021-09-02      |
| hCoV-19/Japan/PG-73379/2021 | EPI_ISL_3879545 | 2021-09-02      |
| hCoV-19/Japan/PG-73380/2021 | EPI_ISL_3879547 | 2021-09-02      |
| hCoV-19/Japan/PG-73381/2021 | EPI_ISL_3879549 | 2021-09-02      |
| hCoV-19/Japan/PG-73382/2021 | EPI_ISL_3879551 | 2021-09-02      |
| hCoV-19/Japan/PG-73383/2021 | EPI_ISL_3879554 | 2021-09-02      |
| hCoV-19/Japan/PG-73384/2021 | EPI_ISL_3879556 | 2021-09-02      |
| hCoV-19/Japan/PG-73385/2021 | EPI_ISL_3879558 | 2021-09-02      |
| hCoV-19/Japan/PG-73386/2021 | EPI_ISL_3879560 | 2021-09-02      |
| hCoV-19/Japan/PG-73387/2021 | EPI_ISL_3879562 | 2021-09-02      |

| virus_name                  | epiID           | submission_date |
|-----------------------------|-----------------|-----------------|
| hCoV-19/Japan/PG-73388/2021 | EPI_ISL_3879565 | 2021-09-02      |
| hCoV-19/Japan/PG-73389/2021 | EPI_ISL_3879568 | 2021-09-02      |
| hCoV-19/Japan/PG-73390/2021 | EPI_ISL_3879570 | 2021-09-02      |
| hCoV-19/Japan/PG-73391/2021 | EPI_ISL_3879572 | 2021-09-02      |
| hCoV-19/Japan/PG-73392/2021 | EPI_ISL_3879575 | 2021-09-02      |
| hCoV-19/Japan/PG-73393/2021 | EPI_ISL_3879577 | 2021-09-02      |
| hCoV-19/Japan/PG-73394/2021 | EPI_ISL_3879579 | 2021-09-02      |
| hCoV-19/Japan/PG-73395/2021 | EPI_ISL_3879582 | 2021-09-02      |
| hCoV-19/Japan/PG-73396/2021 | EPI_ISL_3879585 | 2021-09-02      |
| hCoV-19/Japan/PG-73397/2021 | EPI_ISL_3879587 | 2021-09-02      |
| hCoV-19/Japan/PG-73398/2021 | EPI_ISL_3879590 | 2021-09-02      |
| hCoV-19/Japan/PG-73399/2021 | EPI_ISL_3879592 | 2021-09-02      |
| hCoV-19/Japan/PG-73400/2021 | EPI_ISL_3879595 | 2021-09-02      |
| hCoV-19/Japan/PG-73401/2021 | EPI_ISL_3879596 | 2021-09-02      |
| hCoV-19/Japan/PG-73402/2021 | EPI_ISL_3879599 | 2021-09-02      |
| hCoV-19/Japan/PG-73403/2021 | EPI_ISL_3879601 | 2021-09-02      |
| hCoV-19/Japan/PG-73404/2021 | EPI_ISL_3879603 | 2021-09-02      |
| hCoV-19/Japan/PG-73405/2021 | EPI_ISL_3879605 | 2021-09-02      |
| hCoV-19/Japan/PG-73406/2021 | EPI_ISL_3879608 | 2021-09-02      |
| hCoV-19/Japan/PG-73407/2021 | EPI_ISL_3879610 | 2021-09-02      |
| hCoV-19/Japan/PG-73408/2021 | EPI_ISL_3879612 | 2021-09-02      |
| hCoV-19/Japan/PG-73409/2021 | EPI_ISL_3879615 | 2021-09-02      |
| hCoV-19/Japan/PG-73410/2021 | EPI_ISL_3879617 | 2021-09-02      |
| hCoV-19/Japan/PG-73411/2021 | EPI_ISL_3879619 | 2021-09-02      |
| hCoV-19/Japan/PG-73412/2021 | EPI_ISL_3879622 | 2021-09-02      |
| hCoV-19/Japan/PG-73413/2021 | EPI_ISL_3879625 | 2021-09-02      |
| hCoV-19/Japan/PG-73414/2021 | EPI_ISL_3879627 | 2021-09-02      |
| hCoV-19/Japan/PG-73415/2021 | EPI_ISL_3879629 | 2021-09-02      |
| hCoV-19/Japan/PG-73416/2021 | EPI_ISL_3879631 | 2021-09-02      |
| hCoV-19/Japan/PG-73417/2021 | EPI_ISL_3879632 | 2021-09-02      |
| hCoV-19/Japan/PG-73418/2021 | EPI_ISL_3879635 | 2021-09-02      |
| hCoV-19/Japan/PG-73419/2021 | EPI_ISL_3879637 | 2021-09-02      |
| hCoV-19/Japan/PG-73420/2021 | EPI_ISL_3879640 | 2021-09-02      |
| hCoV-19/Japan/PG-73421/2021 | EPI_ISL_3879641 | 2021-09-02      |
| hCoV-19/Japan/PG-73422/2021 | EPI_ISL_3879643 | 2021-09-02      |
| hCoV-19/Japan/PG-73423/2021 | EPI_ISL_3879646 | 2021-09-02      |
| hCoV-19/Japan/PG-73424/2021 | EPI_ISL_3879647 | 2021-09-02      |
| hCoV-19/Japan/PG-73425/2021 | EPI_ISL_3879650 | 2021-09-02      |
| hCoV-19/Japan/PG-73426/2021 | EPI_ISL_3879652 | 2021-09-02      |
| hCoV-19/Japan/PG-73427/2021 | EPI_ISL_3879654 | 2021-09-02      |
| hCoV-19/Japan/PG-73428/2021 | EPI_ISL_3879656 | 2021-09-02      |
| hCoV-19/Japan/PG-73429/2021 | EPI_ISL_3879658 | 2021-09-02      |
| hCoV-19/Japan/PG-73430/2021 | EPI_ISL_3879660 | 2021-09-02      |
| hCoV-19/Japan/PG-73431/2021 | EPI_ISL_3879663 | 2021-09-02      |
| hCoV-19/Japan/PG-73432/2021 | EPI_ISL_3879665 | 2021-09-02      |
| hCoV-19/Japan/PG-73433/2021 | EPI_ISL_3879666 | 2021-09-02      |
| hCoV-19/Japan/PG-73434/2021 | EPI_ISL_3879668 | 2021-09-02      |
| hCoV-19/Japan/PG-73435/2021 | EPI_ISL_3879669 | 2021-09-02      |
| hCoV-19/Japan/PG-73436/2021 | EPI_ISL_3879671 | 2021-09-02      |
| hCoV-19/Japan/PG-73437/2021 | EPI_ISL_3879673 | 2021-09-02      |
| hCoV-19/Japan/PG-73438/2021 | EPI_ISL_3879676 | 2021-09-02      |
| hCoV-19/Japan/PG-73439/2021 | EPI_ISL_3879679 | 2021-09-02      |
| hCoV-19/Japan/PG-73440/2021 | EPI_ISL_3879682 | 2021-09-02      |
| hCoV-19/Japan/PG-73441/2021 | EPI_ISL_3879684 | 2021-09-02      |

| virus_name                  | epiID           | submission_date |
|-----------------------------|-----------------|-----------------|
| hCoV-19/Japan/PG-73442/2021 | EPI_ISL_3879687 | 2021-09-02      |
| hCoV-19/Japan/PG-73443/2021 | EPI_ISL_3879689 | 2021-09-02      |
| hCoV-19/Japan/PG-73444/2021 | EPI_ISL_3879691 | 2021-09-02      |
| hCoV-19/Japan/PG-73445/2021 | EPI_ISL_3879694 | 2021-09-02      |
| hCoV-19/Japan/PG-73446/2021 | EPI_ISL_3879696 | 2021-09-02      |
| hCoV-19/Japan/PG-73447/2021 | EPI_ISL_3879699 | 2021-09-02      |
| hCoV-19/Japan/PG-73448/2021 | EPI_ISL_3879701 | 2021-09-02      |
| hCoV-19/Japan/PG-73449/2021 | EPI_ISL_3879703 | 2021-09-02      |
| hCoV-19/Japan/PG-73450/2021 | EPI_ISL_3879706 | 2021-09-02      |
| hCoV-19/Japan/PG-73451/2021 | EPI_ISL_3879708 | 2021-09-02      |
| hCoV-19/Japan/PG-73452/2021 | EPI_ISL_3879710 | 2021-09-02      |
| hCoV-19/Japan/PG-73453/2021 | EPI_ISL_3879713 | 2021-09-02      |
| hCoV-19/Japan/PG-73454/2021 | EPI_ISL_3879715 | 2021-09-02      |
| hCoV-19/Japan/PG-73455/2021 | EPI_ISL_3879717 | 2021-09-02      |
| hCoV-19/Japan/PG-73456/2021 | EPI_ISL_3879719 | 2021-09-02      |
| hCoV-19/Japan/PG-73457/2021 | EPI_ISL_3879722 | 2021-09-02      |
| hCoV-19/Japan/PG-73458/2021 | EPI_ISL_3879725 | 2021-09-02      |
| hCoV-19/Japan/PG-73459/2021 | EPI_ISL_3879726 | 2021-09-02      |
| hCoV-19/Japan/PG-73460/2021 | EPI_ISL_3879729 | 2021-09-02      |
| hCoV-19/Japan/PG-73461/2021 | EPI_ISL_3879731 | 2021-09-02      |
| hCoV-19/Japan/PG-73462/2021 | EPI_ISL_3879733 | 2021-09-02      |
| hCoV-19/Japan/PG-73463/2021 | EPI_ISL_3879735 | 2021-09-02      |
| hCoV-19/Japan/PG-73464/2021 | EPI_ISL_3879738 | 2021-09-02      |
| hCoV-19/Japan/PG-73465/2021 | EPI_ISL_3879741 | 2021-09-02      |
| hCoV-19/Japan/PG-73466/2021 | EPI_ISL_3879744 | 2021-09-02      |
| hCoV-19/Japan/PG-73467/2021 | EPI_ISL_3879745 | 2021-09-02      |
| hCoV-19/Japan/PG-73468/2021 | EPI_ISL_3879748 | 2021-09-02      |
| hCoV-19/Japan/PG-73469/2021 | EPI_ISL_3879750 | 2021-09-02      |
| hCoV-19/Japan/PG-73470/2021 | EPI_ISL_3879752 | 2021-09-02      |
| hCoV-19/Japan/PG-73471/2021 | EPI_ISL_3879755 | 2021-09-02      |
| hCoV-19/Japan/PG-73472/2021 | EPI_ISL_3879757 | 2021-09-02      |
| hCoV-19/Japan/PG-73473/2021 | EPI_ISL_3879760 | 2021-09-02      |
| hCoV-19/Japan/PG-73474/2021 | EPI_ISL_3879762 | 2021-09-02      |
| hCoV-19/Japan/PG-73475/2021 | EPI_ISL_3879764 | 2021-09-02      |
| hCoV-19/Japan/PG-73476/2021 | EPI_ISL_3879766 | 2021-09-02      |
| hCoV-19/Japan/PG-73477/2021 | EPI_ISL_3879768 | 2021-09-02      |
| hCoV-19/Japan/PG-73478/2021 | EPI_ISL_3879770 | 2021-09-02      |
| hCoV-19/Japan/PG-73479/2021 | EPI_ISL_3879772 | 2021-09-02      |
| hCoV-19/Japan/PG-73480/2021 | EPI_ISL_3879775 | 2021-09-02      |
| hCoV-19/Japan/PG-73481/2021 | EPI_ISL_3879777 | 2021-09-02      |
| hCoV-19/Japan/PG-73482/2021 | EPI_ISL_3879779 | 2021-09-02      |
| hCoV-19/Japan/PG-73483/2021 | EPI_ISL_3879780 | 2021-09-02      |
| hCoV-19/Japan/PG-73484/2021 | EPI_ISL_3879782 | 2021-09-02      |
| hCoV-19/Japan/PG-73485/2021 | EPI_ISL_3879783 | 2021-09-02      |
| hCoV-19/Japan/PG-73486/2021 | EPI_ISL_3879785 | 2021-09-02      |
| hCoV-19/Japan/PG-73487/2021 | EPI_ISL_3879787 | 2021-09-02      |
| hCoV-19/Japan/PG-73488/2021 | EPI_ISL_3879789 | 2021-09-02      |
| hCoV-19/Japan/PG-73489/2021 | EPI_ISL_3879791 | 2021-09-02      |
| hCoV-19/Japan/PG-73490/2021 | EPI_ISL_3879793 | 2021-09-02      |
| hCoV-19/Japan/PG-73491/2021 | EPI_ISL_3879796 | 2021-09-02      |
| hCoV-19/Japan/PG-73492/2021 | EPI_ISL_3879798 | 2021-09-02      |
| hCoV-19/Japan/PG-73493/2021 | EPI_ISL_3879799 | 2021-09-02      |
| hCoV-19/Japan/PG-73494/2021 | EPI_ISL_3879800 | 2021-09-02      |
| hCoV-19/Japan/PG-73495/2021 | EPI_ISL_3879801 | 2021-09-02      |

| virus_name                  | epiID           | submission_date |
|-----------------------------|-----------------|-----------------|
| hCoV-19/Japan/PG-73496/2021 | EPI_ISL_3879802 | 2021-09-02      |
| hCoV-19/Japan/PG-73497/2021 | EPI_ISL_3879803 | 2021-09-02      |
| hCoV-19/Japan/PG-73498/2021 | EPI_ISL_3879804 | 2021-09-02      |
| hCoV-19/Japan/PG-73499/2021 | EPI_ISL_3879806 | 2021-09-02      |
| hCoV-19/Japan/PG-73500/2021 | EPI_ISL_3879809 | 2021-09-02      |
| hCoV-19/Japan/PG-73501/2021 | EPI_ISL_3879811 | 2021-09-02      |
| hCoV-19/Japan/PG-73502/2021 | EPI_ISL_3879813 | 2021-09-02      |
| hCoV-19/Japan/PG-73503/2021 | EPI_ISL_3879814 | 2021-09-02      |
| hCoV-19/Japan/PG-73504/2021 | EPI_ISL_3879815 | 2021-09-02      |
| hCoV-19/Japan/PG-73505/2021 | EPI_ISL_3879816 | 2021-09-02      |
| hCoV-19/Japan/PG-73506/2021 | EPI_ISL_3879817 | 2021-09-02      |
| hCoV-19/Japan/PG-73507/2021 | EPI_ISL_3879818 | 2021-09-02      |
| hCoV-19/Japan/PG-73508/2021 | EPI_ISL_3879821 | 2021-09-02      |
| hCoV-19/Japan/PG-73509/2021 | EPI_ISL_3879824 | 2021-09-02      |
| hCoV-19/Japan/PG-73510/2021 | EPI_ISL_3879827 | 2021-09-02      |
| hCoV-19/Japan/PG-73511/2021 | EPI_ISL_3879828 | 2021-09-02      |
| hCoV-19/Japan/PG-73512/2021 | EPI_ISL_3879831 | 2021-09-02      |
| hCoV-19/Japan/PG-73513/2021 | EPI_ISL_3879833 | 2021-09-02      |
| hCoV-19/Japan/PG-73514/2021 | EPI_ISL_3879836 | 2021-09-02      |
| hCoV-19/Japan/PG-73515/2021 | EPI_ISL_3879838 | 2021-09-02      |
| hCoV-19/Japan/PG-73516/2021 | EPI_ISL_3879841 | 2021-09-02      |
| hCoV-19/Japan/PG-73517/2021 | EPI_ISL_3879844 | 2021-09-02      |
| hCoV-19/Japan/PG-73518/2021 | EPI_ISL_3879846 | 2021-09-02      |
| hCoV-19/Japan/PG-73519/2021 | EPI_ISL_3879848 | 2021-09-02      |
| hCoV-19/Japan/PG-73520/2021 | EPI_ISL_3879851 | 2021-09-02      |
| hCoV-19/Japan/PG-73521/2021 | EPI_ISL_3879853 | 2021-09-02      |
| hCoV-19/Japan/PG-73522/2021 | EPI_ISL_3879855 | 2021-09-02      |
| hCoV-19/Japan/PG-73523/2021 | EPI_ISL_3879858 | 2021-09-02      |
| hCoV-19/Japan/PG-73524/2021 | EPI_ISL_3879860 | 2021-09-02      |
| hCoV-19/Japan/PG-73525/2021 | EPI_ISL_3879862 | 2021-09-02      |
| hCoV-19/Japan/PG-73526/2021 | EPI_ISL_3879863 | 2021-09-02      |
| hCoV-19/Japan/PG-73527/2021 | EPI_ISL_3879865 | 2021-09-02      |
| hCoV-19/Japan/PG-73528/2021 | EPI_ISL_3879867 | 2021-09-02      |
| hCoV-19/Japan/PG-73529/2021 | EPI_ISL_3879869 | 2021-09-02      |
| hCoV-19/Japan/PG-73530/2021 | EPI_ISL_3879871 | 2021-09-02      |
| hCoV-19/Japan/PG-73531/2021 | EPI_ISL_3879872 | 2021-09-02      |
| hCoV-19/Japan/PG-73532/2021 | EPI_ISL_3879874 | 2021-09-02      |
| hCoV-19/Japan/PG-73533/2021 | EPI_ISL_3879876 | 2021-09-02      |
| hCoV-19/Japan/PG-73534/2021 | EPI_ISL_3879878 | 2021-09-02      |
| hCoV-19/Japan/PG-73535/2021 | EPI_ISL_3879880 | 2021-09-02      |
| hCoV-19/Japan/PG-73536/2021 | EPI_ISL_3879883 | 2021-09-02      |
| hCoV-19/Japan/PG-73537/2021 | EPI_ISL_3879885 | 2021-09-02      |
| hCoV-19/Japan/PG-73538/2021 | EPI_ISL_3879887 | 2021-09-02      |
| hCoV-19/Japan/PG-73539/2021 | EPI_ISL_3879889 | 2021-09-02      |
| hCoV-19/Japan/PG-73540/2021 | EPI_ISL_3879892 | 2021-09-02      |
| hCoV-19/Japan/PG-73541/2021 | EPI_ISL_3879894 | 2021-09-02      |
| hCoV-19/Japan/PG-73542/2021 | EPI_ISL_3879895 | 2021-09-02      |
| hCoV-19/Japan/PG-73543/2021 | EPI_ISL_3879896 | 2021-09-02      |
| hCoV-19/Japan/PG-73544/2021 | EPI_ISL_3879898 | 2021-09-02      |
| hCoV-19/Japan/PG-73545/2021 | EPI_ISL_3879899 | 2021-09-02      |
| hCoV-19/Japan/PG-73546/2021 | EPI_ISL_3879901 | 2021-09-02      |
| hCoV-19/Japan/PG-73547/2021 | EPI_ISL_3879902 | 2021-09-02      |
| hCoV-19/Japan/PG-73548/2021 | EPI_ISL_3879904 | 2021-09-02      |
| hCoV-19/Japan/PG-73549/2021 | EPI_ISL_3879906 | 2021-09-02      |

| virus_name                  | epiID           | submission_date |
|-----------------------------|-----------------|-----------------|
| hCoV-19/Japan/PG-73550/2021 | EPI_ISL_3879909 | 2021-09-02      |
| hCoV-19/Japan/PG-73551/2021 | EPI_ISL_3879910 | 2021-09-02      |
| hCoV-19/Japan/PG-73552/2021 | EPI_ISL_3879912 | 2021-09-02      |
| hCoV-19/Japan/PG-73553/2021 | EPI_ISL_3879914 | 2021-09-02      |
| hCoV-19/Japan/PG-73554/2021 | EPI_ISL_3879916 | 2021-09-02      |
| hCoV-19/Japan/PG-73555/2021 | EPI_ISL_3879918 | 2021-09-02      |
| hCoV-19/Japan/PG-73556/2021 | EPI_ISL_3879921 | 2021-09-02      |
| hCoV-19/Japan/PG-73557/2021 | EPI_ISL_3879923 | 2021-09-02      |
| hCoV-19/Japan/PG-73558/2021 | EPI_ISL_3879925 | 2021-09-02      |
| hCoV-19/Japan/PG-73559/2021 | EPI_ISL_3879927 | 2021-09-02      |
| hCoV-19/Japan/PG-73560/2021 | EPI_ISL_3879930 | 2021-09-02      |
| hCoV-19/Japan/PG-73561/2021 | EPI_ISL_3879932 | 2021-09-02      |
| hCoV-19/Japan/PG-73562/2021 | EPI_ISL_3879934 | 2021-09-02      |
| hCoV-19/Japan/PG-73563/2021 | EPI_ISL_3879936 | 2021-09-02      |
| hCoV-19/Japan/PG-73564/2021 | EPI_ISL_3879938 | 2021-09-02      |
| hCoV-19/Japan/PG-73565/2021 | EPI_ISL_3879941 | 2021-09-02      |
| hCoV-19/Japan/PG-73566/2021 | EPI_ISL_3879943 | 2021-09-02      |
| hCoV-19/Japan/PG-73567/2021 | EPI_ISL_3879945 | 2021-09-02      |
| hCoV-19/Japan/PG-73568/2021 | EPI_ISL_3879948 | 2021-09-02      |
| hCoV-19/Japan/PG-73569/2021 | EPI_ISL_3879950 | 2021-09-02      |
| hCoV-19/Japan/PG-73570/2021 | EPI_ISL_3879953 | 2021-09-02      |
| hCoV-19/Japan/PG-73571/2021 | EPI_ISL_3879955 | 2021-09-02      |
| hCoV-19/Japan/PG-73572/2021 | EPI_ISL_3879957 | 2021-09-02      |
| hCoV-19/Japan/PG-73573/2021 | EPI_ISL_3879959 | 2021-09-02      |
| hCoV-19/Japan/PG-73574/2021 | EPI_ISL_3879961 | 2021-09-02      |
| hCoV-19/Japan/PG-73575/2021 | EPI_ISL_3879963 | 2021-09-02      |
| hCoV-19/Japan/PG-73576/2021 | EPI_ISL_3879965 | 2021-09-02      |
| hCoV-19/Japan/PG-73577/2021 | EPI_ISL_3879966 | 2021-09-02      |
| hCoV-19/Japan/PG-73578/2021 | EPI_ISL_3879968 | 2021-09-02      |
| hCoV-19/Japan/PG-73579/2021 | EPI_ISL_3879970 | 2021-09-02      |
| hCoV-19/Japan/PG-73580/2021 | EPI_ISL_3879972 | 2021-09-02      |
| hCoV-19/Japan/PG-73581/2021 | EPI_ISL_3879973 | 2021-09-02      |
| hCoV-19/Japan/PG-73582/2021 | EPI_ISL_3879976 | 2021-09-02      |
| hCoV-19/Japan/PG-73583/2021 | EPI_ISL_3879978 | 2021-09-02      |
| hCoV-19/Japan/PG-73584/2021 | EPI_ISL_3879980 | 2021-09-02      |
| hCoV-19/Japan/PG-73585/2021 | EPI_ISL_3879981 | 2021-09-02      |
| hCoV-19/Japan/PG-73586/2021 | EPI_ISL_3879982 | 2021-09-02      |
| hCoV-19/Japan/PG-73587/2021 | EPI_ISL_3879983 | 2021-09-02      |
| hCoV-19/Japan/PG-73588/2021 | EPI_ISL_3879985 | 2021-09-02      |
| hCoV-19/Japan/PG-73589/2021 | EPI_ISL_3879987 | 2021-09-02      |
| hCoV-19/Japan/PG-73590/2021 | EPI_ISL_3879990 | 2021-09-02      |
| hCoV-19/Japan/PG-73591/2021 | EPI_ISL_3879991 | 2021-09-02      |
| hCoV-19/Japan/PG-73592/2021 | EPI_ISL_3879993 | 2021-09-02      |
| hCoV-19/Japan/PG-73593/2021 | EPI_ISL_3879994 | 2021-09-02      |
| hCoV-19/Japan/PG-73594/2021 | EPI_ISL_3879996 | 2021-09-02      |
| hCoV-19/Japan/PG-73595/2021 | EPI_ISL_3879998 | 2021-09-02      |
| hCoV-19/Japan/PG-73596/2021 | EPI_ISL_3880000 | 2021-09-02      |
| hCoV-19/Japan/PG-73597/2021 | EPI_ISL_3880002 | 2021-09-02      |
| hCoV-19/Japan/PG-73598/2021 | EPI_ISL_3880004 | 2021-09-02      |
| hCoV-19/Japan/PG-73599/2021 | EPI_ISL_3880006 | 2021-09-02      |
| hCoV-19/Japan/PG-73600/2021 | EPI_ISL_3880008 | 2021-09-02      |
| hCoV-19/Japan/PG-73601/2021 | EPI_ISL_3880011 | 2021-09-02      |
| hCoV-19/Japan/PG-73602/2021 | EPI_ISL_3880012 | 2021-09-02      |
| hCoV-19/Japan/PG-73603/2021 | EPI_ISL_3880014 | 2021-09-02      |

| virus_name                  | epiID           | submission_date |
|-----------------------------|-----------------|-----------------|
| hCoV-19/Japan/PG-73604/2021 | EPI_ISL_3880016 | 2021-09-02      |
| hCoV-19/Japan/PG-73605/2021 | EPI_ISL_3880018 | 2021-09-02      |
| hCoV-19/Japan/PG-73606/2021 | EPI_ISL_3880019 | 2021-09-02      |
| hCoV-19/Japan/PG-73607/2021 | EPI_ISL_3880021 | 2021-09-02      |
| hCoV-19/Japan/PG-73608/2021 | EPI_ISL_3880022 | 2021-09-02      |
| hCoV-19/Japan/PG-73609/2021 | EPI_ISL_3880025 | 2021-09-02      |
| hCoV-19/Japan/PG-73610/2021 | EPI_ISL_3880027 | 2021-09-02      |
| hCoV-19/Japan/PG-73611/2021 | EPI_ISL_3880029 | 2021-09-02      |
| hCoV-19/Japan/PG-73612/2021 | EPI_ISL_3880030 | 2021-09-02      |
| hCoV-19/Japan/PG-73613/2021 | EPI_ISL_3880032 | 2021-09-02      |
| hCoV-19/Japan/PG-73614/2021 | EPI_ISL_3880034 | 2021-09-02      |
| hCoV-19/Japan/PG-73615/2021 | EPI_ISL_3880037 | 2021-09-02      |
| hCoV-19/Japan/PG-73616/2021 | EPI_ISL_3880039 | 2021-09-02      |
| hCoV-19/Japan/PG-73617/2021 | EPI_ISL_3880041 | 2021-09-02      |
| hCoV-19/Japan/PG-73618/2021 | EPI_ISL_3880044 | 2021-09-02      |
| hCoV-19/Japan/PG-73619/2021 | EPI_ISL_3880046 | 2021-09-02      |
| hCoV-19/Japan/PG-73620/2021 | EPI_ISL_3880048 | 2021-09-02      |
| hCoV-19/Japan/PG-73621/2021 | EPI_ISL_3880050 | 2021-09-02      |
| hCoV-19/Japan/PG-73622/2021 | EPI_ISL_3880052 | 2021-09-02      |
| hCoV-19/Japan/PG-73623/2021 | EPI_ISL_3880054 | 2021-09-02      |
| hCoV-19/Japan/PG-73624/2021 | EPI_ISL_3880056 | 2021-09-02      |
| hCoV-19/Japan/PG-73625/2021 | EPI_ISL_3880059 | 2021-09-02      |
| hCoV-19/Japan/PG-73626/2021 | EPI_ISL_3880060 | 2021-09-02      |
| hCoV-19/Japan/PG-73627/2021 | EPI_ISL_3880063 | 2021-09-02      |
| hCoV-19/Japan/PG-73628/2021 | EPI_ISL_3880066 | 2021-09-02      |
| hCoV-19/Japan/PG-73629/2021 | EPI_ISL_3880068 | 2021-09-02      |
| hCoV-19/Japan/PG-73630/2021 | EPI_ISL_3880070 | 2021-09-02      |
| hCoV-19/Japan/PG-73631/2021 | EPI_ISL_3880072 | 2021-09-02      |
| hCoV-19/Japan/PG-73632/2021 | EPI_ISL_3880074 | 2021-09-02      |
| hCoV-19/Japan/PG-73633/2021 | EPI_ISL_3880076 | 2021-09-02      |
| hCoV-19/Japan/PG-73634/2021 | EPI_ISL_3880078 | 2021-09-02      |
| hCoV-19/Japan/PG-73635/2021 | EPI_ISL_3880081 | 2021-09-02      |
| hCoV-19/Japan/PG-73636/2021 | EPI_ISL_3880083 | 2021-09-02      |
| hCoV-19/Japan/PG-73637/2021 | EPI_ISL_3880085 | 2021-09-02      |
| hCoV-19/Japan/PG-73638/2021 | EPI_ISL_3880087 | 2021-09-02      |
| hCoV-19/Japan/PG-73639/2021 | EPI_ISL_3880090 | 2021-09-02      |
| hCoV-19/Japan/PG-73640/2021 | EPI_ISL_3880092 | 2021-09-02      |
| hCoV-19/Japan/PG-73641/2021 | EPI_ISL_3880095 | 2021-09-02      |
| hCoV-19/Japan/PG-73642/2021 | EPI_ISL_3880098 | 2021-09-02      |
| hCoV-19/Japan/PG-73643/2021 | EPI_ISL_3880100 | 2021-09-02      |
| hCoV-19/Japan/PG-73644/2021 | EPI_ISL_3880102 | 2021-09-02      |
| hCoV-19/Japan/PG-73645/2021 | EPI_ISL_3880105 | 2021-09-02      |
| hCoV-19/Japan/PG-73646/2021 | EPI_ISL_3880107 | 2021-09-02      |
| hCoV-19/Japan/PG-73647/2021 | EPI_ISL_3880109 | 2021-09-02      |
| hCoV-19/Japan/PG-73648/2021 | EPI_ISL_3880112 | 2021-09-02      |
| hCoV-19/Japan/PG-73649/2021 | EPI_ISL_3880114 | 2021-09-02      |
| hCoV-19/Japan/PG-73650/2021 | EPI_ISL_3880116 | 2021-09-02      |
| hCoV-19/Japan/PG-73651/2021 | EPI_ISL_3880118 | 2021-09-02      |
| hCoV-19/Japan/PG-73652/2021 | EPI_ISL_3880121 | 2021-09-02      |
| hCoV-19/Japan/PG-73653/2021 | EPI_ISL_3880123 | 2021-09-02      |
| hCoV-19/Japan/PG-73654/2021 | EPI_ISL_3880125 | 2021-09-02      |
| hCoV-19/Japan/PG-73655/2021 | EPI_ISL_3880127 | 2021-09-02      |
| hCoV-19/Japan/PG-73656/2021 | EPI_ISL_3880129 | 2021-09-02      |
| hCoV-19/Japan/PG-73657/2021 | EPI_ISL_3880131 | 2021-09-02      |



| virus_name                  | epiID           | submission_date |
|-----------------------------|-----------------|-----------------|
| hCoV-19/Japan/PG-73658/2021 | EPI_ISL_3880133 | 2021-09-02      |
| hCoV-19/Japan/PG-73659/2021 | EPI_ISL_3880136 | 2021-09-02      |
| hCoV-19/Japan/PG-73660/2021 | EPI_ISL_3880138 | 2021-09-02      |
| hCoV-19/Japan/PG-73661/2021 | EPI_ISL_3880141 | 2021-09-02      |
| hCoV-19/Japan/PG-73662/2021 | EPI_ISL_3880143 | 2021-09-02      |
| hCoV-19/Japan/PG-73663/2021 | EPI_ISL_3880145 | 2021-09-02      |
| hCoV-19/Japan/PG-73664/2021 | EPI_ISL_3880147 | 2021-09-02      |
| hCoV-19/Japan/PG-73665/2021 | EPI_ISL_3880150 | 2021-09-02      |
| hCoV-19/Japan/PG-73666/2021 | EPI_ISL_3880152 | 2021-09-02      |
| hCoV-19/Japan/PG-73667/2021 | EPI_ISL_3880154 | 2021-09-02      |
| hCoV-19/Japan/PG-73668/2021 | EPI_ISL_3880156 | 2021-09-02      |
| hCoV-19/Japan/PG-73669/2021 | EPI_ISL_3880158 | 2021-09-02      |
| hCoV-19/Japan/PG-73670/2021 | EPI_ISL_3880159 | 2021-09-02      |
| hCoV-19/Japan/PG-73671/2021 | EPI_ISL_3880162 | 2021-09-02      |
| hCoV-19/Japan/PG-73672/2021 | EPI_ISL_3880164 | 2021-09-02      |
| hCoV-19/Japan/PG-73673/2021 | EPI_ISL_3880167 | 2021-09-02      |
| hCoV-19/Japan/PG-73674/2021 | EPI_ISL_3880169 | 2021-09-02      |
| hCoV-19/Japan/PG-73675/2021 | EPI_ISL_3880171 | 2021-09-02      |
| hCoV-19/Japan/PG-73676/2021 | EPI_ISL_3880173 | 2021-09-02      |
| hCoV-19/Japan/PG-73677/2021 | EPI_ISL_3880175 | 2021-09-02      |
| hCoV-19/Japan/PG-73678/2021 | EPI_ISL_3880176 | 2021-09-02      |
| hCoV-19/Japan/PG-73679/2021 | EPI_ISL_3880177 | 2021-09-02      |
| hCoV-19/Japan/PG-73680/2021 | EPI_ISL_3880178 | 2021-09-02      |
| hCoV-19/Japan/PG-73681/2021 | EPI_ISL_3880179 | 2021-09-02      |
| hCoV-19/Japan/PG-73682/2021 | EPI_ISL_3880180 | 2021-09-02      |
| hCoV-19/Japan/PG-73683/2021 | EPI_ISL_3880182 | 2021-09-02      |
| hCoV-19/Japan/PG-73684/2021 | EPI_ISL_3880184 | 2021-09-02      |
| hCoV-19/Japan/PG-73685/2021 | EPI_ISL_3880185 | 2021-09-02      |
| hCoV-19/Japan/PG-73686/2021 | EPI_ISL_3880187 | 2021-09-02      |
| hCoV-19/Japan/PG-73687/2021 | EPI_ISL_3880190 | 2021-09-02      |
| hCoV-19/Japan/PG-73688/2021 | EPI_ISL_3880192 | 2021-09-02      |
| hCoV-19/Japan/PG-73689/2021 | EPI_ISL_3880194 | 2021-09-02      |
| hCoV-19/Japan/PG-73690/2021 | EPI_ISL_3880196 | 2021-09-02      |
| hCoV-19/Japan/PG-73691/2021 | EPI_ISL_3880198 | 2021-09-02      |
| hCoV-19/Japan/PG-73692/2021 | EPI_ISL_3880201 | 2021-09-02      |
| hCoV-19/Japan/PG-73693/2021 | EPI_ISL_3880203 | 2021-09-02      |
| hCoV-19/Japan/PG-73694/2021 | EPI_ISL_3880205 | 2021-09-02      |
| hCoV-19/Japan/PG-73695/2021 | EPI_ISL_3880207 | 2021-09-02      |
| hCoV-19/Japan/PG-73696/2021 | EPI_ISL_3880210 | 2021-09-02      |
| hCoV-19/Japan/PG-73697/2021 | EPI_ISL_3880213 | 2021-09-02      |
| hCoV-19/Japan/PG-73698/2021 | EPI_ISL_3880215 | 2021-09-02      |
| hCoV-19/Japan/PG-73699/2021 | EPI_ISL_3880217 | 2021-09-02      |
| hCoV-19/Japan/PG-73700/2021 | EPI_ISL_3880220 | 2021-09-02      |
| hCoV-19/Japan/PG-73701/2021 | EPI_ISL_3880222 | 2021-09-02      |
| hCoV-19/Japan/PG-73702/2021 | EPI_ISL_3880224 | 2021-09-02      |
| hCoV-19/Japan/PG-73703/2021 | EPI_ISL_3880226 | 2021-09-02      |
| hCoV-19/Japan/PG-73704/2021 | EPI_ISL_3880229 | 2021-09-02      |
| hCoV-19/Japan/PG-73705/2021 | EPI_ISL_3880232 | 2021-09-02      |
| hCoV-19/Japan/PG-73706/2021 | EPI_ISL_3880234 | 2021-09-02      |
| hCoV-19/Japan/PG-73707/2021 | EPI_ISL_3880237 | 2021-09-02      |
| hCoV-19/Japan/PG-73708/2021 | EPI_ISL_3880239 | 2021-09-02      |
| hCoV-19/Japan/PG-73709/2021 | EPI_ISL_3880242 | 2021-09-02      |
| hCoV-19/Japan/PG-73710/2021 | EPI_ISL_3880244 | 2021-09-02      |
| hCoV-19/Japan/PG-73711/2021 | EPI_ISL_3880246 | 2021-09-02      |

| virus_name                  | epiID           | submission_date |
|-----------------------------|-----------------|-----------------|
| hCoV-19/Japan/PG-73712/2021 | EPI_ISL_3880249 | 2021-09-02      |
| hCoV-19/Japan/PG-73713/2021 | EPI_ISL_3880251 | 2021-09-02      |
| hCoV-19/Japan/PG-73714/2021 | EPI_ISL_3880254 | 2021-09-02      |
| hCoV-19/Japan/PG-73715/2021 | EPI_ISL_3880256 | 2021-09-02      |
| hCoV-19/Japan/PG-73716/2021 | EPI_ISL_3880258 | 2021-09-02      |
| hCoV-19/Japan/PG-73717/2021 | EPI_ISL_3880260 | 2021-09-02      |
| hCoV-19/Japan/PG-73718/2021 | EPI_ISL_3880262 | 2021-09-02      |
| hCoV-19/Japan/PG-73719/2021 | EPI_ISL_3880264 | 2021-09-02      |
| hCoV-19/Japan/PG-73720/2021 | EPI_ISL_3880266 | 2021-09-02      |
| hCoV-19/Japan/PG-73721/2021 | EPI_ISL_3880268 | 2021-09-02      |
| hCoV-19/Japan/PG-73722/2021 | EPI_ISL_3880270 | 2021-09-02      |
| hCoV-19/Japan/PG-73723/2021 | EPI_ISL_3880272 | 2021-09-02      |
| hCoV-19/Japan/PG-73724/2021 | EPI_ISL_3880274 | 2021-09-02      |
| hCoV-19/Japan/PG-73725/2021 | EPI_ISL_3880276 | 2021-09-02      |
| hCoV-19/Japan/PG-73726/2021 | EPI_ISL_3880279 | 2021-09-02      |
| hCoV-19/Japan/PG-73727/2021 | EPI_ISL_3880281 | 2021-09-02      |
| hCoV-19/Japan/PG-73728/2021 | EPI_ISL_3880282 | 2021-09-02      |
| hCoV-19/Japan/PG-73729/2021 | EPI_ISL_3880283 | 2021-09-02      |
| hCoV-19/Japan/PG-73730/2021 | EPI_ISL_3880284 | 2021-09-02      |
| hCoV-19/Japan/PG-73731/2021 | EPI_ISL_3880285 | 2021-09-02      |
| hCoV-19/Japan/PG-73732/2021 | EPI_ISL_3880286 | 2021-09-02      |
| hCoV-19/Japan/PG-73733/2021 | EPI_ISL_3880287 | 2021-09-02      |
| hCoV-19/Japan/PG-73734/2021 | EPI_ISL_3880289 | 2021-09-02      |
| hCoV-19/Japan/PG-73735/2021 | EPI_ISL_3880291 | 2021-09-02      |
| hCoV-19/Japan/PG-73736/2021 | EPI_ISL_3880293 | 2021-09-02      |
| hCoV-19/Japan/PG-73737/2021 | EPI_ISL_3880295 | 2021-09-02      |
| hCoV-19/Japan/PG-73738/2021 | EPI_ISL_3880298 | 2021-09-02      |
| hCoV-19/Japan/PG-73739/2021 | EPI_ISL_3880300 | 2021-09-02      |
| hCoV-19/Japan/PG-73740/2021 | EPI_ISL_3880302 | 2021-09-02      |
| hCoV-19/Japan/PG-73741/2021 | EPI_ISL_3880305 | 2021-09-02      |
| hCoV-19/Japan/PG-73742/2021 | EPI_ISL_3880308 | 2021-09-02      |
| hCoV-19/Japan/PG-73743/2021 | EPI_ISL_3880310 | 2021-09-02      |
| hCoV-19/Japan/PG-73744/2021 | EPI_ISL_3880312 | 2021-09-02      |
| hCoV-19/Japan/PG-73745/2021 | EPI_ISL_3880314 | 2021-09-02      |
| hCoV-19/Japan/PG-73746/2021 | EPI_ISL_3880317 | 2021-09-02      |
| hCoV-19/Japan/PG-73747/2021 | EPI_ISL_3880319 | 2021-09-02      |
| hCoV-19/Japan/PG-73748/2021 | EPI_ISL_3880321 | 2021-09-02      |
| hCoV-19/Japan/PG-73749/2021 | EPI_ISL_3880323 | 2021-09-02      |
| hCoV-19/Japan/PG-73750/2021 | EPI_ISL_3880325 | 2021-09-02      |
| hCoV-19/Japan/PG-73751/2021 | EPI_ISL_3880328 | 2021-09-02      |
| hCoV-19/Japan/PG-73752/2021 | EPI_ISL_3880330 | 2021-09-02      |
| hCoV-19/Japan/PG-73753/2021 | EPI_ISL_3880333 | 2021-09-02      |
| hCoV-19/Japan/PG-73754/2021 | EPI_ISL_3880334 | 2021-09-02      |
| hCoV-19/Japan/PG-73755/2021 | EPI_ISL_3880337 | 2021-09-02      |
| hCoV-19/Japan/PG-73756/2021 | EPI_ISL_3880340 | 2021-09-02      |
| hCoV-19/Japan/PG-73757/2021 | EPI_ISL_3880343 | 2021-09-02      |
| hCoV-19/Japan/PG-73758/2021 | EPI_ISL_3880345 | 2021-09-02      |
| hCoV-19/Japan/PG-73759/2021 | EPI_ISL_3880347 | 2021-09-02      |
| hCoV-19/Japan/PG-73760/2021 | EPI_ISL_3880350 | 2021-09-02      |
| hCoV-19/Japan/PG-73761/2021 | EPI_ISL_3880352 | 2021-09-02      |
| hCoV-19/Japan/PG-73762/2021 | EPI_ISL_3880355 | 2021-09-02      |
| hCoV-19/Japan/PG-73763/2021 | EPI_ISL_3880358 | 2021-09-02      |
| hCoV-19/Japan/PG-73764/2021 | EPI_ISL_3880360 | 2021-09-02      |
| hCoV-19/Japan/PG-73765/2021 | EPI_ISL_3880363 | 2021-09-02      |

| virus_name                  | epiID           | submission_date |
|-----------------------------|-----------------|-----------------|
| hCoV-19/Japan/PG-73766/2021 | EPI_ISL_3880365 | 2021-09-02      |
| hCoV-19/Japan/PG-73767/2021 | EPI_ISL_3880368 | 2021-09-02      |
| hCoV-19/Japan/PG-73768/2021 | EPI_ISL_3880371 | 2021-09-02      |
| hCoV-19/Japan/PG-73769/2021 | EPI_ISL_3880374 | 2021-09-02      |
| hCoV-19/Japan/PG-73770/2021 | EPI_ISL_3880376 | 2021-09-02      |
| hCoV-19/Japan/PG-73771/2021 | EPI_ISL_3880378 | 2021-09-02      |
| hCoV-19/Japan/PG-73772/2021 | EPI_ISL_3880379 | 2021-09-02      |
| hCoV-19/Japan/PG-73773/2021 | EPI_ISL_3880381 | 2021-09-02      |
| hCoV-19/Japan/PG-73774/2021 | EPI_ISL_3880382 | 2021-09-02      |
| hCoV-19/Japan/PG-73775/2021 | EPI_ISL_3880384 | 2021-09-02      |
| hCoV-19/Japan/PG-73776/2021 | EPI_ISL_3880387 | 2021-09-02      |
| hCoV-19/Japan/PG-73777/2021 | EPI_ISL_3880389 | 2021-09-02      |
| hCoV-19/Japan/PG-73778/2021 | EPI_ISL_3880392 | 2021-09-02      |
| hCoV-19/Japan/PG-73779/2021 | EPI_ISL_3880394 | 2021-09-02      |
| hCoV-19/Japan/PG-73780/2021 | EPI_ISL_3880397 | 2021-09-02      |
| hCoV-19/Japan/PG-73781/2021 | EPI_ISL_3880399 | 2021-09-02      |
| hCoV-19/Japan/PG-73782/2021 | EPI_ISL_3880402 | 2021-09-02      |
| hCoV-19/Japan/PG-73783/2021 | EPI_ISL_3880405 | 2021-09-02      |
| hCoV-19/Japan/PG-73784/2021 | EPI_ISL_3880406 | 2021-09-02      |
| hCoV-19/Japan/PG-73785/2021 | EPI_ISL_3880409 | 2021-09-02      |
| hCoV-19/Japan/PG-73786/2021 | EPI_ISL_3880411 | 2021-09-02      |
| hCoV-19/Japan/PG-73787/2021 | EPI_ISL_3880413 | 2021-09-02      |
| hCoV-19/Japan/PG-73788/2021 | EPI_ISL_3880416 | 2021-09-02      |
| hCoV-19/Japan/PG-73789/2021 | EPI_ISL_3880418 | 2021-09-02      |
| hCoV-19/Japan/PG-73790/2021 | EPI_ISL_3880419 | 2021-09-02      |
| hCoV-19/Japan/PG-73791/2021 | EPI_ISL_3880421 | 2021-09-02      |
| hCoV-19/Japan/PG-73792/2021 | EPI_ISL_3880424 | 2021-09-02      |
| hCoV-19/Japan/PG-73793/2021 | EPI_ISL_3880426 | 2021-09-02      |
| hCoV-19/Japan/PG-73794/2021 | EPI_ISL_3880429 | 2021-09-02      |
| hCoV-19/Japan/PG-73795/2021 | EPI_ISL_3880430 | 2021-09-02      |
| hCoV-19/Japan/PG-73796/2021 | EPI_ISL_3880433 | 2021-09-02      |
| hCoV-19/Japan/PG-73797/2021 | EPI_ISL_3880435 | 2021-09-02      |
| hCoV-19/Japan/PG-73798/2021 | EPI_ISL_3880438 | 2021-09-02      |
| hCoV-19/Japan/PG-73799/2021 | EPI_ISL_3880440 | 2021-09-02      |
| hCoV-19/Japan/PG-73800/2021 | EPI_ISL_3880443 | 2021-09-02      |
| hCoV-19/Japan/PG-73801/2021 | EPI_ISL_3880445 | 2021-09-02      |
| hCoV-19/Japan/PG-73802/2021 | EPI_ISL_3880447 | 2021-09-02      |
| hCoV-19/Japan/PG-73803/2021 | EPI_ISL_3880449 | 2021-09-02      |
| hCoV-19/Japan/PG-73804/2021 | EPI_ISL_3880451 | 2021-09-02      |
| hCoV-19/Japan/PG-73805/2021 | EPI_ISL_3880454 | 2021-09-02      |
| hCoV-19/Japan/PG-73806/2021 | EPI_ISL_3880456 | 2021-09-02      |
| hCoV-19/Japan/PG-73807/2021 | EPI_ISL_3880459 | 2021-09-02      |
| hCoV-19/Japan/PG-73808/2021 | EPI_ISL_3880461 | 2021-09-02      |
| hCoV-19/Japan/PG-73809/2021 | EPI_ISL_3880463 | 2021-09-02      |
| hCoV-19/Japan/PG-73810/2021 | EPI_ISL_3880464 | 2021-09-02      |
| hCoV-19/Japan/PG-73811/2021 | EPI_ISL_3880465 | 2021-09-02      |
| hCoV-19/Japan/PG-73812/2021 | EPI_ISL_3880468 | 2021-09-02      |
| hCoV-19/Japan/PG-73813/2021 | EPI_ISL_3880470 | 2021-09-02      |
| hCoV-19/Japan/PG-73814/2021 | EPI_ISL_3880473 | 2021-09-02      |
| hCoV-19/Japan/PG-73815/2021 | EPI_ISL_3880475 | 2021-09-02      |
| hCoV-19/Japan/PG-73816/2021 | EPI_ISL_3880477 | 2021-09-02      |
| hCoV-19/Japan/PG-73817/2021 | EPI_ISL_3880479 | 2021-09-02      |
| hCoV-19/Japan/PG-73818/2021 | EPI_ISL_3880482 | 2021-09-02      |
| hCoV-19/Japan/PG-73819/2021 | EPI_ISL_3880484 | 2021-09-02      |

| virus_name                  | epiID           | submission_date |
|-----------------------------|-----------------|-----------------|
| hCoV-19/Japan/PG-73820/2021 | EPI_ISL_3880486 | 2021-09-02      |
| hCoV-19/Japan/PG-73821/2021 | EPI_ISL_3880488 | 2021-09-02      |
| hCoV-19/Japan/PG-73822/2021 | EPI_ISL_3880490 | 2021-09-02      |
| hCoV-19/Japan/PG-73823/2021 | EPI_ISL_3880492 | 2021-09-02      |
| hCoV-19/Japan/PG-73824/2021 | EPI_ISL_3880494 | 2021-09-02      |
| hCoV-19/Japan/PG-73825/2021 | EPI_ISL_3880497 | 2021-09-02      |
| hCoV-19/Japan/PG-73826/2021 | EPI_ISL_3880499 | 2021-09-02      |
| hCoV-19/Japan/PG-73827/2021 | EPI_ISL_3880501 | 2021-09-02      |
| hCoV-19/Japan/PG-73828/2021 | EPI_ISL_3880506 | 2021-09-02      |
| hCoV-19/Japan/PG-73829/2021 | EPI_ISL_3880507 | 2021-09-02      |
| hCoV-19/Japan/PG-73830/2021 | EPI_ISL_3880509 | 2021-09-02      |
| hCoV-19/Japan/PG-73831/2021 | EPI_ISL_3880512 | 2021-09-02      |
| hCoV-19/Japan/PG-73832/2021 | EPI_ISL_3880514 | 2021-09-02      |
| hCoV-19/Japan/PG-73833/2021 | EPI_ISL_3880517 | 2021-09-02      |
| hCoV-19/Japan/PG-73834/2021 | EPI_ISL_3880519 | 2021-09-02      |
| hCoV-19/Japan/PG-73835/2021 | EPI_ISL_3880521 | 2021-09-02      |
| hCoV-19/Japan/PG-73836/2021 | EPI_ISL_3880523 | 2021-09-02      |
| hCoV-19/Japan/PG-73837/2021 | EPI_ISL_3880526 | 2021-09-02      |
| hCoV-19/Japan/PG-73838/2021 | EPI_ISL_3880528 | 2021-09-02      |
| hCoV-19/Japan/PG-73839/2021 | EPI_ISL_3880530 | 2021-09-02      |
| hCoV-19/Japan/PG-73840/2021 | EPI_ISL_3880532 | 2021-09-02      |
| hCoV-19/Japan/PG-73841/2021 | EPI_ISL_3880535 | 2021-09-02      |
| hCoV-19/Japan/PG-73842/2021 | EPI_ISL_3880538 | 2021-09-02      |
| hCoV-19/Japan/PG-73843/2021 | EPI_ISL_3880541 | 2021-09-02      |
| hCoV-19/Japan/PG-73844/2021 | EPI_ISL_3880543 | 2021-09-02      |
| hCoV-19/Japan/PG-73845/2021 | EPI_ISL_3880546 | 2021-09-02      |
| hCoV-19/Japan/PG-73846/2021 | EPI_ISL_3880548 | 2021-09-02      |
| hCoV-19/Japan/PG-73847/2021 | EPI_ISL_3880550 | 2021-09-02      |
| hCoV-19/Japan/PG-73848/2021 | EPI_ISL_3880552 | 2021-09-02      |
| hCoV-19/Japan/PG-73849/2021 | EPI_ISL_3880553 | 2021-09-02      |
| hCoV-19/Japan/PG-73850/2021 | EPI_ISL_3880556 | 2021-09-02      |
| hCoV-19/Japan/PG-73851/2021 | EPI_ISL_3880558 | 2021-09-02      |
| hCoV-19/Japan/PG-73852/2021 | EPI_ISL_3880561 | 2021-09-02      |
| hCoV-19/Japan/PG-73853/2021 | EPI_ISL_3880562 | 2021-09-02      |
| hCoV-19/Japan/PG-73854/2021 | EPI_ISL_3880564 | 2021-09-02      |
| hCoV-19/Japan/PG-73855/2021 | EPI_ISL_3880566 | 2021-09-02      |
| hCoV-19/Japan/PG-73856/2021 | EPI_ISL_3880568 | 2021-09-02      |
| hCoV-19/Japan/PG-73857/2021 | EPI_ISL_3880570 | 2021-09-02      |
| hCoV-19/Japan/PG-73858/2021 | EPI_ISL_3880571 | 2021-09-02      |
| hCoV-19/Japan/PG-73859/2021 | EPI_ISL_3880573 | 2021-09-02      |
| hCoV-19/Japan/PG-73860/2021 | EPI_ISL_3880575 | 2021-09-02      |
| hCoV-19/Japan/PG-73861/2021 | EPI_ISL_3880576 | 2021-09-02      |
| hCoV-19/Japan/PG-73862/2021 | EPI_ISL_3880578 | 2021-09-02      |
| hCoV-19/Japan/PG-73863/2021 | EPI_ISL_3880579 | 2021-09-02      |
| hCoV-19/Japan/PG-73864/2021 | EPI_ISL_3880580 | 2021-09-02      |
| hCoV-19/Japan/PG-73865/2021 | EPI_ISL_3880582 | 2021-09-02      |
| hCoV-19/Japan/PG-73866/2021 | EPI_ISL_3880583 | 2021-09-02      |
| hCoV-19/Japan/PG-73867/2021 | EPI_ISL_3880585 | 2021-09-02      |
| hCoV-19/Japan/PG-73868/2021 | EPI_ISL_3880587 | 2021-09-02      |
| hCoV-19/Japan/PG-73869/2021 | EPI_ISL_3880589 | 2021-09-02      |
| hCoV-19/Japan/PG-73870/2021 | EPI_ISL_3880591 | 2021-09-02      |
| hCoV-19/Japan/PG-73871/2021 | EPI_ISL_3880594 | 2021-09-02      |
| hCoV-19/Japan/PG-73872/2021 | EPI_ISL_3880595 | 2021-09-02      |
| hCoV-19/Japan/PG-73873/2021 | EPI_ISL_3880596 | 2021-09-02      |

| virus_name                  | epiID           | submission_date |
|-----------------------------|-----------------|-----------------|
| hCoV-19/Japan/PG-73874/2021 | EPI_ISL_3880597 | 2021-09-02      |
| hCoV-19/Japan/PG-73875/2021 | EPI_ISL_3880598 | 2021-09-02      |
| hCoV-19/Japan/PG-73876/2021 | EPI_ISL_3880600 | 2021-09-02      |
| hCoV-19/Japan/PG-73877/2021 | EPI_ISL_3880601 | 2021-09-02      |
| hCoV-19/Japan/PG-73878/2021 | EPI_ISL_3880602 | 2021-09-02      |
| hCoV-19/Japan/PG-73879/2021 | EPI_ISL_3880605 | 2021-09-02      |
| hCoV-19/Japan/PG-73880/2021 | EPI_ISL_3880607 | 2021-09-02      |
| hCoV-19/Japan/PG-73881/2021 | EPI_ISL_3880608 | 2021-09-02      |
| hCoV-19/Japan/PG-73882/2021 | EPI_ISL_3880610 | 2021-09-02      |
| hCoV-19/Japan/PG-73883/2021 | EPI_ISL_3880612 | 2021-09-02      |
| hCoV-19/Japan/PG-73884/2021 | EPI_ISL_3880614 | 2021-09-02      |
| hCoV-19/Japan/PG-73885/2021 | EPI_ISL_3880615 | 2021-09-02      |
| hCoV-19/Japan/PG-73886/2021 | EPI_ISL_3880618 | 2021-09-02      |
| hCoV-19/Japan/PG-73887/2021 | EPI_ISL_3880620 | 2021-09-02      |
| hCoV-19/Japan/PG-73888/2021 | EPI_ISL_3880622 | 2021-09-02      |
| hCoV-19/Japan/PG-73889/2021 | EPI_ISL_3880624 | 2021-09-02      |
| hCoV-19/Japan/PG-73890/2021 | EPI_ISL_3880625 | 2021-09-02      |
| hCoV-19/Japan/PG-73891/2021 | EPI_ISL_3880628 | 2021-09-02      |
| hCoV-19/Japan/PG-73892/2021 | EPI_ISL_3880631 | 2021-09-02      |
| hCoV-19/Japan/PG-73893/2021 | EPI_ISL_3880633 | 2021-09-02      |
| hCoV-19/Japan/PG-73894/2021 | EPI_ISL_3880635 | 2021-09-02      |
| hCoV-19/Japan/PG-73895/2021 | EPI_ISL_3880637 | 2021-09-02      |
| hCoV-19/Japan/PG-73896/2021 | EPI_ISL_3880638 | 2021-09-02      |
| hCoV-19/Japan/PG-73897/2021 | EPI_ISL_3880640 | 2021-09-02      |
| hCoV-19/Japan/PG-73898/2021 | EPI_ISL_3880641 | 2021-09-02      |
| hCoV-19/Japan/PG-73899/2021 | EPI_ISL_3880643 | 2021-09-02      |
| hCoV-19/Japan/PG-73900/2021 | EPI_ISL_3880646 | 2021-09-02      |
| hCoV-19/Japan/PG-73901/2021 | EPI_ISL_3880647 | 2021-09-02      |
| hCoV-19/Japan/PG-73902/2021 | EPI_ISL_3880649 | 2021-09-02      |
| hCoV-19/Japan/PG-73903/2021 | EPI_ISL_3880651 | 2021-09-02      |
| hCoV-19/Japan/PG-73904/2021 | EPI_ISL_3880653 | 2021-09-02      |
| hCoV-19/Japan/PG-73905/2021 | EPI_ISL_3880654 | 2021-09-02      |
| hCoV-19/Japan/PG-73906/2021 | EPI_ISL_3880655 | 2021-09-02      |
| hCoV-19/Japan/PG-73907/2021 | EPI_ISL_3880657 | 2021-09-02      |
| hCoV-19/Japan/PG-73908/2021 | EPI_ISL_3880659 | 2021-09-02      |
| hCoV-19/Japan/PG-73909/2021 | EPI_ISL_3880662 | 2021-09-02      |
| hCoV-19/Japan/PG-73910/2021 | EPI_ISL_3880664 | 2021-09-02      |
| hCoV-19/Japan/PG-73911/2021 | EPI_ISL_3880667 | 2021-09-02      |
| hCoV-19/Japan/PG-73912/2021 | EPI_ISL_3880669 | 2021-09-02      |
| hCoV-19/Japan/PG-73913/2021 | EPI_ISL_3880670 | 2021-09-02      |
| hCoV-19/Japan/PG-73914/2021 | EPI_ISL_3880672 | 2021-09-02      |
| hCoV-19/Japan/PG-73915/2021 | EPI_ISL_3880675 | 2021-09-02      |
| hCoV-19/Japan/PG-73916/2021 | EPI_ISL_3880677 | 2021-09-02      |
| hCoV-19/Japan/PG-73917/2021 | EPI_ISL_3880678 | 2021-09-02      |
| hCoV-19/Japan/PG-73918/2021 | EPI_ISL_3880682 | 2021-09-02      |
| hCoV-19/Japan/PG-73919/2021 | EPI_ISL_3880684 | 2021-09-02      |
| hCoV-19/Japan/PG-73920/2021 | EPI_ISL_3880686 | 2021-09-02      |
| hCoV-19/Japan/PG-73921/2021 | EPI_ISL_3880688 | 2021-09-02      |
| hCoV-19/Japan/PG-73922/2021 | EPI_ISL_3880690 | 2021-09-02      |
| hCoV-19/Japan/PG-73923/2021 | EPI_ISL_3880692 | 2021-09-02      |
| hCoV-19/Japan/PG-73924/2021 | EPI_ISL_3880695 | 2021-09-02      |
| hCoV-19/Japan/PG-73925/2021 | EPI_ISL_3880697 | 2021-09-02      |
| hCoV-19/Japan/PG-73926/2021 | EPI_ISL_3880698 | 2021-09-02      |
| hCoV-19/Japan/PG-73927/2021 | EPI_ISL_3880700 | 2021-09-02      |

| virus_name                  | epiID           | submission_date |
|-----------------------------|-----------------|-----------------|
| hCoV-19/Japan/PG-73928/2021 | EPI_ISL_3880703 | 2021-09-02      |
| hCoV-19/Japan/PG-73929/2021 | EPI_ISL_3880705 | 2021-09-02      |
| hCoV-19/Japan/PG-73930/2021 | EPI_ISL_3880707 | 2021-09-02      |
| hCoV-19/Japan/PG-73931/2021 | EPI_ISL_3880709 | 2021-09-02      |
| hCoV-19/Japan/PG-73932/2021 | EPI_ISL_3880711 | 2021-09-02      |
| hCoV-19/Japan/PG-73933/2021 | EPI_ISL_3880713 | 2021-09-02      |
| hCoV-19/Japan/PG-73934/2021 | EPI_ISL_3880715 | 2021-09-02      |
| hCoV-19/Japan/PG-73935/2021 | EPI_ISL_3880717 | 2021-09-02      |
| hCoV-19/Japan/PG-73936/2021 | EPI_ISL_3880719 | 2021-09-02      |
| hCoV-19/Japan/PG-73937/2021 | EPI_ISL_3880722 | 2021-09-02      |
| hCoV-19/Japan/PG-73938/2021 | EPI_ISL_3880724 | 2021-09-02      |
| hCoV-19/Japan/PG-73939/2021 | EPI_ISL_3880726 | 2021-09-02      |
| hCoV-19/Japan/PG-73940/2021 | EPI_ISL_3880729 | 2021-09-02      |
| hCoV-19/Japan/PG-73941/2021 | EPI_ISL_3880730 | 2021-09-02      |
| hCoV-19/Japan/PG-73942/2021 | EPI_ISL_3880733 | 2021-09-02      |
| hCoV-19/Japan/PG-73943/2021 | EPI_ISL_3880735 | 2021-09-02      |
| hCoV-19/Japan/PG-73944/2021 | EPI_ISL_3880736 | 2021-09-02      |
| hCoV-19/Japan/PG-73945/2021 | EPI_ISL_3880738 | 2021-09-02      |
| hCoV-19/Japan/PG-73946/2021 | EPI_ISL_3880740 | 2021-09-02      |
| hCoV-19/Japan/PG-73947/2021 | EPI_ISL_3880742 | 2021-09-02      |
| hCoV-19/Japan/PG-73948/2021 | EPI_ISL_3880745 | 2021-09-02      |
| hCoV-19/Japan/PG-73949/2021 | EPI_ISL_3880747 | 2021-09-02      |
| hCoV-19/Japan/PG-73950/2021 | EPI_ISL_3880749 | 2021-09-02      |
| hCoV-19/Japan/PG-73951/2021 | EPI_ISL_3880752 | 2021-09-02      |
| hCoV-19/Japan/PG-73952/2021 | EPI_ISL_3880754 | 2021-09-02      |
| hCoV-19/Japan/PG-73953/2021 | EPI_ISL_3880756 | 2021-09-02      |
| hCoV-19/Japan/PG-73954/2021 | EPI_ISL_3880758 | 2021-09-02      |
| hCoV-19/Japan/PG-73955/2021 | EPI_ISL_3880760 | 2021-09-02      |
| hCoV-19/Japan/PG-73956/2021 | EPI_ISL_3880762 | 2021-09-02      |
| hCoV-19/Japan/PG-73957/2021 | EPI_ISL_3880765 | 2021-09-02      |
| hCoV-19/Japan/PG-73958/2021 | EPI_ISL_3880767 | 2021-09-02      |
| hCoV-19/Japan/PG-73959/2021 | EPI_ISL_3880769 | 2021-09-02      |
| hCoV-19/Japan/PG-73960/2021 | EPI_ISL_3880771 | 2021-09-02      |
| hCoV-19/Japan/PG-73961/2021 | EPI_ISL_3880773 | 2021-09-02      |
| hCoV-19/Japan/PG-73962/2021 | EPI_ISL_3880774 | 2021-09-02      |
| hCoV-19/Japan/PG-73963/2021 | EPI_ISL_3880776 | 2021-09-02      |
| hCoV-19/Japan/PG-73964/2021 | EPI_ISL_3880778 | 2021-09-02      |
| hCoV-19/Japan/PG-73965/2021 | EPI_ISL_3880781 | 2021-09-02      |
| hCoV-19/Japan/PG-73966/2021 | EPI_ISL_3880783 | 2021-09-02      |
| hCoV-19/Japan/PG-73967/2021 | EPI_ISL_3880786 | 2021-09-02      |
| hCoV-19/Japan/PG-73968/2021 | EPI_ISL_3880789 | 2021-09-02      |
| hCoV-19/Japan/PG-73969/2021 | EPI_ISL_3880791 | 2021-09-02      |
| hCoV-19/Japan/PG-73970/2021 | EPI_ISL_3880794 | 2021-09-02      |
| hCoV-19/Japan/PG-73971/2021 | EPI_ISL_3880796 | 2021-09-02      |
| hCoV-19/Japan/PG-73972/2021 | EPI_ISL_3880798 | 2021-09-02      |
| hCoV-19/Japan/PG-73973/2021 | EPI_ISL_3880799 | 2021-09-02      |
| hCoV-19/Japan/PG-73974/2021 | EPI_ISL_3880801 | 2021-09-02      |
| hCoV-19/Japan/PG-73975/2021 | EPI_ISL_3880803 | 2021-09-02      |
| hCoV-19/Japan/PG-73976/2021 | EPI_ISL_3880805 | 2021-09-02      |
| hCoV-19/Japan/PG-73977/2021 | EPI_ISL_3880807 | 2021-09-02      |
| hCoV-19/Japan/PG-73978/2021 | EPI_ISL_3880809 | 2021-09-02      |
| hCoV-19/Japan/PG-73979/2021 | EPI_ISL_3880812 | 2021-09-02      |
| hCoV-19/Japan/PG-73980/2021 | EPI_ISL_3880814 | 2021-09-02      |
| hCoV-19/Japan/PG-73981/2021 | EPI_ISL_3880816 | 2021-09-02      |

| virus_name                  | epiID           | submission_date |
|-----------------------------|-----------------|-----------------|
| hCoV-19/Japan/PG-73982/2021 | EPI_ISL_3880818 | 2021-09-02      |
| hCoV-19/Japan/PG-73983/2021 | EPI_ISL_3880820 | 2021-09-02      |
| hCoV-19/Japan/PG-73984/2021 | EPI_ISL_3880822 | 2021-09-02      |
| hCoV-19/Japan/PG-73985/2021 | EPI_ISL_3880824 | 2021-09-02      |
| hCoV-19/Japan/PG-73986/2021 | EPI_ISL_3880826 | 2021-09-02      |
| hCoV-19/Japan/PG-73987/2021 | EPI_ISL_3880829 | 2021-09-02      |
| hCoV-19/Japan/PG-73988/2021 | EPI_ISL_3880831 | 2021-09-02      |
| hCoV-19/Japan/PG-73989/2021 | EPI_ISL_3880834 | 2021-09-02      |
| hCoV-19/Japan/PG-73990/2021 | EPI_ISL_3880836 | 2021-09-02      |
| hCoV-19/Japan/PG-73991/2021 | EPI_ISL_3880838 | 2021-09-02      |
| hCoV-19/Japan/PG-73992/2021 | EPI_ISL_3880841 | 2021-09-02      |
| hCoV-19/Japan/PG-73993/2021 | EPI_ISL_3880843 | 2021-09-02      |
| hCoV-19/Japan/PG-73994/2021 | EPI_ISL_3880845 | 2021-09-02      |
| hCoV-19/Japan/PG-73995/2021 | EPI_ISL_3880847 | 2021-09-02      |
| hCoV-19/Japan/PG-73996/2021 | EPI_ISL_3880849 | 2021-09-02      |
| hCoV-19/Japan/PG-73997/2021 | EPI_ISL_3880851 | 2021-09-02      |
| hCoV-19/Japan/PG-73998/2021 | EPI_ISL_3880853 | 2021-09-02      |
| hCoV-19/Japan/PG-73999/2021 | EPI_ISL_3880856 | 2021-09-02      |
| hCoV-19/Japan/PG-74000/2021 | EPI_ISL_3880858 | 2021-09-02      |
| hCoV-19/Japan/PG-74001/2021 | EPI_ISL_3880860 | 2021-09-02      |
| hCoV-19/Japan/PG-74002/2021 | EPI_ISL_3880862 | 2021-09-02      |
| hCoV-19/Japan/PG-74003/2021 | EPI_ISL_3880863 | 2021-09-02      |
| hCoV-19/Japan/PG-74004/2021 | EPI_ISL_3880866 | 2021-09-02      |
| hCoV-19/Japan/PG-74005/2021 | EPI_ISL_3880868 | 2021-09-02      |
| hCoV-19/Japan/PG-74006/2021 | EPI_ISL_3880870 | 2021-09-02      |
| hCoV-19/Japan/PG-74007/2021 | EPI_ISL_3880872 | 2021-09-02      |
| hCoV-19/Japan/PG-74008/2021 | EPI_ISL_3880874 | 2021-09-02      |
| hCoV-19/Japan/PG-74009/2021 | EPI_ISL_3880875 | 2021-09-02      |
| hCoV-19/Japan/PG-74010/2021 | EPI_ISL_3880877 | 2021-09-02      |
| hCoV-19/Japan/PG-74011/2021 | EPI_ISL_3880879 | 2021-09-02      |
| hCoV-19/Japan/PG-74012/2021 | EPI_ISL_3880881 | 2021-09-02      |
| hCoV-19/Japan/PG-74013/2021 | EPI_ISL_3880884 | 2021-09-02      |
| hCoV-19/Japan/PG-74014/2021 | EPI_ISL_3880886 | 2021-09-02      |
| hCoV-19/Japan/PG-74015/2021 | EPI_ISL_3880888 | 2021-09-02      |
| hCoV-19/Japan/PG-74016/2021 | EPI_ISL_3880890 | 2021-09-02      |
| hCoV-19/Japan/PG-74017/2021 | EPI_ISL_3880891 | 2021-09-02      |
| hCoV-19/Japan/PG-74018/2021 | EPI_ISL_3880893 | 2021-09-02      |
| hCoV-19/Japan/PG-74019/2021 | EPI_ISL_3880895 | 2021-09-02      |
| hCoV-19/Japan/PG-74020/2021 | EPI_ISL_3880898 | 2021-09-02      |
| hCoV-19/Japan/PG-74021/2021 | EPI_ISL_3880899 | 2021-09-02      |
| hCoV-19/Japan/PG-74022/2021 | EPI_ISL_3880901 | 2021-09-02      |
| hCoV-19/Japan/PG-74023/2021 | EPI_ISL_3880903 | 2021-09-02      |
| hCoV-19/Japan/PG-74024/2021 | EPI_ISL_3880905 | 2021-09-02      |
| hCoV-19/Japan/PG-74025/2021 | EPI_ISL_3880907 | 2021-09-02      |
| hCoV-19/Japan/PG-74026/2021 | EPI_ISL_3880909 | 2021-09-02      |
| hCoV-19/Japan/PG-74027/2021 | EPI_ISL_3880911 | 2021-09-02      |
| hCoV-19/Japan/PG-74028/2021 | EPI_ISL_3880914 | 2021-09-02      |
| hCoV-19/Japan/PG-74029/2021 | EPI_ISL_3880916 | 2021-09-02      |
| hCoV-19/Japan/PG-74030/2021 | EPI_ISL_3880919 | 2021-09-02      |
| hCoV-19/Japan/PG-74031/2021 | EPI_ISL_3880922 | 2021-09-02      |
| hCoV-19/Japan/PG-74032/2021 | EPI_ISL_3880924 | 2021-09-02      |
| hCoV-19/Japan/PG-74033/2021 | EPI_ISL_3880926 | 2021-09-02      |
| hCoV-19/Japan/PG-74034/2021 | EPI_ISL_3880928 | 2021-09-02      |
| hCoV-19/Japan/PG-74035/2021 | EPI_ISL_3880930 | 2021-09-02      |

| virus_name                  | epiID           | submission_date |
|-----------------------------|-----------------|-----------------|
| hCoV-19/Japan/PG-74036/2021 | EPI_ISL_3880933 | 2021-09-02      |
| hCoV-19/Japan/PG-74037/2021 | EPI_ISL_3880936 | 2021-09-02      |
| hCoV-19/Japan/PG-74038/2021 | EPI_ISL_3880938 | 2021-09-02      |
| hCoV-19/Japan/PG-74039/2021 | EPI_ISL_3880940 | 2021-09-02      |
| hCoV-19/Japan/PG-74040/2021 | EPI_ISL_3880943 | 2021-09-02      |
| hCoV-19/Japan/PG-74041/2021 | EPI_ISL_3880945 | 2021-09-02      |
| hCoV-19/Japan/PG-74042/2021 | EPI_ISL_3880948 | 2021-09-02      |
| hCoV-19/Japan/PG-74043/2021 | EPI_ISL_3880950 | 2021-09-02      |
| hCoV-19/Japan/PG-74044/2021 | EPI_ISL_3880952 | 2021-09-02      |
| hCoV-19/Japan/PG-74045/2021 | EPI_ISL_3880954 | 2021-09-02      |
| hCoV-19/Japan/PG-74046/2021 | EPI_ISL_3880957 | 2021-09-02      |
| hCoV-19/Japan/PG-74047/2021 | EPI_ISL_3880959 | 2021-09-02      |
| hCoV-19/Japan/PG-74048/2021 | EPI_ISL_3880961 | 2021-09-02      |
| hCoV-19/Japan/PG-74049/2021 | EPI_ISL_3880964 | 2021-09-02      |
| hCoV-19/Japan/PG-74050/2021 | EPI_ISL_3880967 | 2021-09-02      |
| hCoV-19/Japan/PG-74051/2021 | EPI_ISL_3880970 | 2021-09-02      |
| hCoV-19/Japan/PG-74052/2021 | EPI_ISL_3880972 | 2021-09-02      |
| hCoV-19/Japan/PG-74053/2021 | EPI_ISL_3880975 | 2021-09-02      |
| hCoV-19/Japan/PG-74054/2021 | EPI_ISL_3880977 | 2021-09-02      |
| hCoV-19/Japan/PG-74055/2021 | EPI_ISL_3880980 | 2021-09-02      |
| hCoV-19/Japan/PG-74056/2021 | EPI_ISL_3880982 | 2021-09-02      |
| hCoV-19/Japan/PG-74057/2021 | EPI_ISL_3880984 | 2021-09-02      |
| hCoV-19/Japan/PG-74058/2021 | EPI_ISL_3880987 | 2021-09-02      |
| hCoV-19/Japan/PG-74059/2021 | EPI_ISL_3880990 | 2021-09-02      |
| hCoV-19/Japan/PG-74060/2021 | EPI_ISL_3880992 | 2021-09-02      |
| hCoV-19/Japan/PG-74061/2021 | EPI_ISL_3880994 | 2021-09-02      |
| hCoV-19/Japan/PG-74062/2021 | EPI_ISL_3880996 | 2021-09-02      |
| hCoV-19/Japan/PG-74063/2021 | EPI_ISL_3880999 | 2021-09-02      |
| hCoV-19/Japan/PG-74064/2021 | EPI_ISL_3881001 | 2021-09-02      |
| hCoV-19/Japan/PG-74065/2021 | EPI_ISL_3881003 | 2021-09-02      |
| hCoV-19/Japan/PG-74066/2021 | EPI_ISL_3881006 | 2021-09-02      |
| hCoV-19/Japan/PG-74067/2021 | EPI_ISL_3881008 | 2021-09-02      |
| hCoV-19/Japan/PG-74068/2021 | EPI_ISL_3881010 | 2021-09-02      |
| hCoV-19/Japan/PG-74069/2021 | EPI_ISL_3881013 | 2021-09-02      |
| hCoV-19/Japan/PG-74070/2021 | EPI_ISL_3881015 | 2021-09-02      |
| hCoV-19/Japan/PG-74071/2021 | EPI_ISL_3881017 | 2021-09-02      |
| hCoV-19/Japan/PG-74072/2021 | EPI_ISL_3881019 | 2021-09-02      |
| hCoV-19/Japan/PG-74073/2021 | EPI_ISL_3881022 | 2021-09-02      |
| hCoV-19/Japan/PG-74074/2021 | EPI_ISL_3881024 | 2021-09-02      |
| hCoV-19/Japan/PG-74075/2021 | EPI_ISL_3881026 | 2021-09-02      |
| hCoV-19/Japan/PG-74076/2021 | EPI_ISL_3881027 | 2021-09-02      |
| hCoV-19/Japan/PG-74077/2021 | EPI_ISL_3881029 | 2021-09-02      |
| hCoV-19/Japan/PG-74078/2021 | EPI_ISL_3881032 | 2021-09-02      |
| hCoV-19/Japan/PG-74079/2021 | EPI_ISL_3881034 | 2021-09-02      |
| hCoV-19/Japan/PG-74080/2021 | EPI_ISL_3881037 | 2021-09-02      |
| hCoV-19/Japan/PG-74081/2021 | EPI_ISL_3881039 | 2021-09-02      |
| hCoV-19/Japan/PG-74082/2021 | EPI_ISL_3881042 | 2021-09-02      |
| hCoV-19/Japan/PG-74083/2021 | EPI_ISL_3881044 | 2021-09-02      |
| hCoV-19/Japan/PG-74084/2021 | EPI_ISL_3881047 | 2021-09-02      |
| hCoV-19/Japan/PG-74085/2021 | EPI_ISL_3881050 | 2021-09-02      |
| hCoV-19/Japan/PG-74086/2021 | EPI_ISL_3881052 | 2021-09-02      |
| hCoV-19/Japan/PG-74087/2021 | EPI_ISL_3881055 | 2021-09-02      |
| hCoV-19/Japan/PG-74088/2021 | EPI_ISL_3881058 | 2021-09-02      |
| hCoV-19/Japan/PG-74089/2021 | EPI_ISL_3881060 | 2021-09-02      |



| virus_name                  | epiID           | submission_date |
|-----------------------------|-----------------|-----------------|
| hCoV-19/Japan/PG-74090/2021 | EPI_ISL_3881062 | 2021-09-02      |
| hCoV-19/Japan/PG-74091/2021 | EPI_ISL_3881064 | 2021-09-02      |
| hCoV-19/Japan/PG-74092/2021 | EPI_ISL_3881066 | 2021-09-02      |
| hCoV-19/Japan/PG-74093/2021 | EPI_ISL_3881068 | 2021-09-02      |
| hCoV-19/Japan/PG-74094/2021 | EPI_ISL_3881070 | 2021-09-02      |
| hCoV-19/Japan/PG-74095/2021 | EPI_ISL_3881071 | 2021-09-02      |
| hCoV-19/Japan/PG-74096/2021 | EPI_ISL_3881073 | 2021-09-02      |
| hCoV-19/Japan/PG-74097/2021 | EPI_ISL_3881075 | 2021-09-02      |
| hCoV-19/Japan/PG-74098/2021 | EPI_ISL_3881077 | 2021-09-02      |
| hCoV-19/Japan/PG-74099/2021 | EPI_ISL_3881080 | 2021-09-02      |
| hCoV-19/Japan/PG-74100/2021 | EPI_ISL_3881082 | 2021-09-02      |
| hCoV-19/Japan/PG-74101/2021 | EPI_ISL_3881084 | 2021-09-02      |
| hCoV-19/Japan/PG-74102/2021 | EPI_ISL_3881086 | 2021-09-02      |
| hCoV-19/Japan/PG-74103/2021 | EPI_ISL_3881088 | 2021-09-02      |
| hCoV-19/Japan/PG-74104/2021 | EPI_ISL_3881091 | 2021-09-02      |
| hCoV-19/Japan/PG-74105/2021 | EPI_ISL_3881093 | 2021-09-02      |
| hCoV-19/Japan/PG-74106/2021 | EPI_ISL_3881096 | 2021-09-02      |
| hCoV-19/Japan/PG-74107/2021 | EPI_ISL_3881097 | 2021-09-02      |
| hCoV-19/Japan/PG-74108/2021 | EPI_ISL_3881098 | 2021-09-02      |
| hCoV-19/Japan/PG-74109/2021 | EPI_ISL_3881100 | 2021-09-02      |
| hCoV-19/Japan/PG-74110/2021 | EPI_ISL_3881101 | 2021-09-02      |
| hCoV-19/Japan/PG-74111/2021 | EPI_ISL_3881104 | 2021-09-02      |
| hCoV-19/Japan/PG-74112/2021 | EPI_ISL_3881107 | 2021-09-02      |
| hCoV-19/Japan/PG-74113/2021 | EPI_ISL_3881108 | 2021-09-02      |
| hCoV-19/Japan/PG-74114/2021 | EPI_ISL_3881110 | 2021-09-02      |
| hCoV-19/Japan/PG-74115/2021 | EPI_ISL_3881112 | 2021-09-02      |
| hCoV-19/Japan/PG-74116/2021 | EPI_ISL_3881113 | 2021-09-02      |
| hCoV-19/Japan/PG-74117/2021 | EPI_ISL_3881115 | 2021-09-02      |
| hCoV-19/Japan/PG-74118/2021 | EPI_ISL_3881118 | 2021-09-02      |
| hCoV-19/Japan/PG-74119/2021 | EPI_ISL_3881120 | 2021-09-02      |
| hCoV-19/Japan/PG-74120/2021 | EPI_ISL_3881122 | 2021-09-02      |
| hCoV-19/Japan/PG-74121/2021 | EPI_ISL_3881123 | 2021-09-02      |
| hCoV-19/Japan/PG-74122/2021 | EPI_ISL_3881125 | 2021-09-02      |
| hCoV-19/Japan/PG-74123/2021 | EPI_ISL_3881127 | 2021-09-02      |
| hCoV-19/Japan/PG-74124/2021 | EPI_ISL_3881128 | 2021-09-02      |
| hCoV-19/Japan/PG-74125/2021 | EPI_ISL_3881130 | 2021-09-02      |
| hCoV-19/Japan/PG-74126/2021 | EPI_ISL_3881132 | 2021-09-02      |
| hCoV-19/Japan/PG-74127/2021 | EPI_ISL_3881133 | 2021-09-02      |
| hCoV-19/Japan/PG-74128/2021 | EPI_ISL_3881135 | 2021-09-02      |
| hCoV-19/Japan/PG-74129/2021 | EPI_ISL_3881137 | 2021-09-02      |
| hCoV-19/Japan/PG-74130/2021 | EPI_ISL_3881140 | 2021-09-02      |
| hCoV-19/Japan/PG-74131/2021 | EPI_ISL_3881144 | 2021-09-02      |
| hCoV-19/Japan/PG-74132/2021 | EPI_ISL_3881146 | 2021-09-02      |
| hCoV-19/Japan/PG-74133/2021 | EPI_ISL_3881149 | 2021-09-02      |
| hCoV-19/Japan/PG-74134/2021 | EPI_ISL_3881152 | 2021-09-02      |
| hCoV-19/Japan/PG-74135/2021 | EPI_ISL_3881154 | 2021-09-02      |
| hCoV-19/Japan/PG-74136/2021 | EPI_ISL_3873585 | 2021-09-02      |
| hCoV-19/Japan/PG-74137/2021 | EPI_ISL_3873586 | 2021-09-02      |
| hCoV-19/Japan/PG-74138/2021 | EPI_ISL_3873587 | 2021-09-02      |
| hCoV-19/Japan/PG-74139/2021 | EPI_ISL_3873588 | 2021-09-02      |
| hCoV-19/Japan/PG-74140/2021 | EPI_ISL_3873589 | 2021-09-02      |
| hCoV-19/Japan/PG-74141/2021 | EPI_ISL_3873590 | 2021-09-02      |
| hCoV-19/Japan/PG-74142/2021 | EPI_ISL_3873591 | 2021-09-02      |
| hCoV-19/Japan/PG-74143/2021 | EPI_ISL_3873592 | 2021-09-02      |

| virus_name                  | epiID           | submission_date |
|-----------------------------|-----------------|-----------------|
| hCoV-19/Japan/PG-74144/2021 | EPI_ISL_3873593 | 2021-09-02      |
| hCoV-19/Japan/PG-74145/2021 | EPI_ISL_3873594 | 2021-09-02      |
| hCoV-19/Japan/PG-74146/2021 | EPI_ISL_3873595 | 2021-09-02      |
| hCoV-19/Japan/PG-74147/2021 | EPI_ISL_3874786 | 2021-09-02      |
| hCoV-19/Japan/PG-74148/2021 | EPI_ISL_3874787 | 2021-09-02      |
| hCoV-19/Japan/PG-74149/2021 | EPI_ISL_3874788 | 2021-09-02      |
| hCoV-19/Japan/PG-74150/2021 | EPI_ISL_3874789 | 2021-09-02      |
| hCoV-19/Japan/PG-74151/2021 | EPI_ISL_3874790 | 2021-09-02      |
| hCoV-19/Japan/PG-74152/2021 | EPI_ISL_3874791 | 2021-09-02      |
| hCoV-19/Japan/PG-74153/2021 | EPI_ISL_3874792 | 2021-09-02      |
| hCoV-19/Japan/PG-74154/2021 | EPI_ISL_3874793 | 2021-09-02      |
| hCoV-19/Japan/PG-74155/2021 | EPI_ISL_3874794 | 2021-09-02      |
| hCoV-19/Japan/PG-74156/2021 | EPI_ISL_3874795 | 2021-09-02      |
| hCoV-19/Japan/PG-74157/2021 | EPI_ISL_3874796 | 2021-09-02      |
| hCoV-19/Japan/PG-74158/2021 | EPI_ISL_3874797 | 2021-09-02      |
| hCoV-19/Japan/PG-74159/2021 | EPI_ISL_3874798 | 2021-09-02      |
| hCoV-19/Japan/PG-74160/2021 | EPI_ISL_3874799 | 2021-09-02      |
| hCoV-19/Japan/PG-74161/2021 | EPI_ISL_3874800 | 2021-09-02      |
| hCoV-19/Japan/PG-74162/2021 | EPI_ISL_3874801 | 2021-09-02      |
| hCoV-19/Japan/PG-74163/2021 | EPI_ISL_3874802 | 2021-09-02      |
| hCoV-19/Japan/PG-74164/2021 | EPI_ISL_3874803 | 2021-09-02      |
| hCoV-19/Japan/PG-74165/2021 | EPI_ISL_3874804 | 2021-09-02      |
| hCoV-19/Japan/PG-74166/2021 | EPI_ISL_3874805 | 2021-09-02      |
| hCoV-19/Japan/PG-74167/2021 | EPI_ISL_3874806 | 2021-09-02      |
| hCoV-19/Japan/PG-74168/2021 | EPI_ISL_3874807 | 2021-09-02      |
| hCoV-19/Japan/PG-74169/2021 | EPI_ISL_3874808 | 2021-09-02      |
| hCoV-19/Japan/PG-74170/2021 | EPI_ISL_3874809 | 2021-09-02      |
| hCoV-19/Japan/PG-74171/2021 | EPI_ISL_3874810 | 2021-09-02      |
| hCoV-19/Japan/PG-74172/2021 | EPI_ISL_3874811 | 2021-09-02      |
| hCoV-19/Japan/PG-74173/2021 | EPI_ISL_3874812 | 2021-09-02      |
| hCoV-19/Japan/PG-74174/2021 | EPI_ISL_3874813 | 2021-09-02      |
| hCoV-19/Japan/PG-74175/2021 | EPI_ISL_3874814 | 2021-09-02      |
| hCoV-19/Japan/PG-74176/2021 | EPI_ISL_3874815 | 2021-09-02      |
| hCoV-19/Japan/PG-74177/2021 | EPI_ISL_3874816 | 2021-09-02      |
| hCoV-19/Japan/PG-74178/2021 | EPI_ISL_3874817 | 2021-09-02      |
| hCoV-19/Japan/PG-74179/2021 | EPI_ISL_3874818 | 2021-09-02      |
| hCoV-19/Japan/PG-74180/2021 | EPI_ISL_3874819 | 2021-09-02      |
| hCoV-19/Japan/PG-74181/2021 | EPI_ISL_3874820 | 2021-09-02      |
| hCoV-19/Japan/PG-74182/2021 | EPI_ISL_3874821 | 2021-09-02      |
| hCoV-19/Japan/PG-74183/2021 | EPI_ISL_3874822 | 2021-09-02      |
| hCoV-19/Japan/PG-74184/2021 | EPI_ISL_3874823 | 2021-09-02      |
| hCoV-19/Japan/PG-74185/2021 | EPI_ISL_3874824 | 2021-09-02      |
| hCoV-19/Japan/PG-74186/2021 | EPI_ISL_3874825 | 2021-09-02      |
| hCoV-19/Japan/PG-74187/2021 | EPI_ISL_3874826 | 2021-09-02      |
| hCoV-19/Japan/PG-74188/2021 | EPI_ISL_3874827 | 2021-09-02      |
| hCoV-19/Japan/PG-74189/2021 | EPI_ISL_3874828 | 2021-09-02      |
| hCoV-19/Japan/PG-74190/2021 | EPI_ISL_3874829 | 2021-09-02      |
| hCoV-19/Japan/PG-74191/2021 | EPI_ISL_3874830 | 2021-09-02      |
| hCoV-19/Japan/PG-74192/2021 | EPI_ISL_3874831 | 2021-09-02      |
| hCoV-19/Japan/PG-74193/2021 | EPI_ISL_3874832 | 2021-09-02      |
| hCoV-19/Japan/PG-74194/2021 | EPI_ISL_3874833 | 2021-09-02      |
| hCoV-19/Japan/PG-74195/2021 | EPI_ISL_3874834 | 2021-09-02      |
| hCoV-19/Japan/PG-74196/2021 | EPI_ISL_3874835 | 2021-09-02      |
| hCoV-19/Japan/PG-74197/2021 | EPI_ISL_3874836 | 2021-09-02      |

| virus_name                  | epiID           | submission_date |
|-----------------------------|-----------------|-----------------|
| hCoV-19/Japan/PG-74198/2021 | EPI_ISL_3874837 | 2021-09-02      |
| hCoV-19/Japan/PG-74199/2021 | EPI_ISL_3874838 | 2021-09-02      |
| hCoV-19/Japan/PG-74200/2021 | EPI_ISL_3874839 | 2021-09-02      |
| hCoV-19/Japan/PG-74201/2021 | EPI_ISL_3874840 | 2021-09-02      |
| hCoV-19/Japan/PG-74202/2021 | EPI_ISL_3874841 | 2021-09-02      |
| hCoV-19/Japan/PG-74203/2021 | EPI_ISL_3874842 | 2021-09-02      |
| hCoV-19/Japan/PG-74204/2021 | EPI_ISL_3874843 | 2021-09-02      |
| hCoV-19/Japan/PG-74205/2021 | EPI_ISL_3874844 | 2021-09-02      |
| hCoV-19/Japan/PG-74206/2021 | EPI_ISL_3874845 | 2021-09-02      |
| hCoV-19/Japan/PG-74207/2021 | EPI_ISL_3874846 | 2021-09-02      |
| hCoV-19/Japan/PG-74208/2021 | EPI_ISL_3874847 | 2021-09-02      |
| hCoV-19/Japan/PG-74209/2021 | EPI_ISL_3874848 | 2021-09-02      |
| hCoV-19/Japan/PG-74210/2021 | EPI_ISL_3874849 | 2021-09-02      |
| hCoV-19/Japan/PG-74211/2021 | EPI_ISL_3874850 | 2021-09-02      |
| hCoV-19/Japan/PG-74212/2021 | EPI_ISL_3874851 | 2021-09-02      |
| hCoV-19/Japan/PG-74213/2021 | EPI_ISL_3874852 | 2021-09-02      |
| hCoV-19/Japan/PG-74214/2021 | EPI_ISL_3874853 | 2021-09-02      |
| hCoV-19/Japan/PG-74215/2021 | EPI_ISL_3874854 | 2021-09-02      |
| hCoV-19/Japan/PG-74216/2021 | EPI_ISL_3874855 | 2021-09-02      |
| hCoV-19/Japan/PG-74217/2021 | EPI_ISL_3874856 | 2021-09-02      |
| hCoV-19/Japan/PG-74218/2021 | EPI_ISL_3874857 | 2021-09-02      |
| hCoV-19/Japan/PG-74219/2021 | EPI_ISL_3874858 | 2021-09-02      |
| hCoV-19/Japan/PG-74220/2021 | EPI_ISL_3874859 | 2021-09-02      |
| hCoV-19/Japan/PG-74221/2021 | EPI_ISL_3874860 | 2021-09-02      |
| hCoV-19/Japan/PG-74222/2021 | EPI_ISL_3874861 | 2021-09-02      |
| hCoV-19/Japan/PG-74223/2021 | EPI_ISL_3874862 | 2021-09-02      |
| hCoV-19/Japan/PG-74224/2021 | EPI_ISL_3874863 | 2021-09-02      |
| hCoV-19/Japan/PG-74225/2021 | EPI_ISL_3874864 | 2021-09-02      |
| hCoV-19/Japan/PG-74226/2021 | EPI_ISL_3874865 | 2021-09-02      |
| hCoV-19/Japan/PG-74227/2021 | EPI_ISL_3874866 | 2021-09-02      |
| hCoV-19/Japan/PG-74228/2021 | EPI_ISL_3874867 | 2021-09-02      |
| hCoV-19/Japan/PG-74229/2021 | EPI_ISL_3874868 | 2021-09-02      |
| hCoV-19/Japan/PG-74230/2021 | EPI_ISL_3874869 | 2021-09-02      |
| hCoV-19/Japan/PG-74231/2021 | EPI_ISL_3874870 | 2021-09-02      |
| hCoV-19/Japan/PG-74232/2021 | EPI_ISL_3871688 | 2021-09-02      |
| hCoV-19/Japan/PG-74233/2021 | EPI_ISL_3871689 | 2021-09-02      |
| hCoV-19/Japan/PG-74234/2021 | EPI_ISL_3871690 | 2021-09-02      |
| hCoV-19/Japan/PG-74235/2021 | EPI_ISL_3871691 | 2021-09-02      |
| hCoV-19/Japan/PG-74236/2021 | EPI_ISL_3871692 | 2021-09-02      |
| hCoV-19/Japan/PG-74237/2021 | EPI_ISL_3871693 | 2021-09-02      |
| hCoV-19/Japan/PG-74238/2021 | EPI_ISL_3871694 | 2021-09-02      |
| hCoV-19/Japan/PG-74239/2021 | EPI_ISL_3871695 | 2021-09-02      |
| hCoV-19/Japan/PG-74240/2021 | EPI_ISL_3871696 | 2021-09-02      |
| hCoV-19/Japan/PG-74241/2021 | EPI_ISL_3871697 | 2021-09-02      |
| hCoV-19/Japan/PG-74242/2021 | EPI_ISL_3871698 | 2021-09-02      |
| hCoV-19/Japan/PG-74243/2021 | EPI_ISL_3871699 | 2021-09-02      |
| hCoV-19/Japan/PG-74244/2021 | EPI_ISL_3871700 | 2021-09-02      |
| hCoV-19/Japan/PG-74245/2021 | EPI_ISL_3871701 | 2021-09-02      |
| hCoV-19/Japan/PG-74246/2021 | EPI_ISL_3871702 | 2021-09-02      |
| hCoV-19/Japan/PG-74247/2021 | EPI_ISL_3871703 | 2021-09-02      |
| hCoV-19/Japan/PG-74248/2021 | EPI_ISL_3871704 | 2021-09-02      |
| hCoV-19/Japan/PG-74249/2021 | EPI_ISL_3871705 | 2021-09-02      |
| hCoV-19/Japan/PG-74250/2021 | EPI_ISL_3873354 | 2021-09-02      |
| hCoV-19/Japan/PG-74251/2021 | EPI_ISL_3873355 | 2021-09-02      |

| virus_name                  | epiID           | submission_date |
|-----------------------------|-----------------|-----------------|
| hCoV-19/Japan/PG-74252/2021 | EPI_ISL_3873356 | 2021-09-02      |
| hCoV-19/Japan/PG-74253/2021 | EPI_ISL_3873357 | 2021-09-02      |
| hCoV-19/Japan/PG-74254/2021 | EPI_ISL_3873358 | 2021-09-02      |
| hCoV-19/Japan/PG-74255/2021 | EPI_ISL_3873359 | 2021-09-02      |
| hCoV-19/Japan/PG-74256/2021 | EPI_ISL_3873360 | 2021-09-02      |
| hCoV-19/Japan/PG-74257/2021 | EPI_ISL_3873361 | 2021-09-02      |
| hCoV-19/Japan/PG-74258/2021 | EPI_ISL_3873362 | 2021-09-02      |
| hCoV-19/Japan/PG-74259/2021 | EPI_ISL_3873363 | 2021-09-02      |
| hCoV-19/Japan/PG-74260/2021 | EPI_ISL_3873364 | 2021-09-02      |
| hCoV-19/Japan/PG-74261/2021 | EPI_ISL_3881157 | 2021-09-02      |
| hCoV-19/Japan/PG-74262/2021 | EPI_ISL_3881160 | 2021-09-02      |
| hCoV-19/Japan/PG-74263/2021 | EPI_ISL_3881164 | 2021-09-02      |
| hCoV-19/Japan/PG-74264/2021 | EPI_ISL_3881167 | 2021-09-02      |
| hCoV-19/Japan/PG-74265/2021 | EPI_ISL_3881169 | 2021-09-02      |
| hCoV-19/Japan/PG-74266/2021 | EPI_ISL_3881173 | 2021-09-02      |
| hCoV-19/Japan/PG-74267/2021 | EPI_ISL_3881175 | 2021-09-02      |
| hCoV-19/Japan/PG-74268/2021 | EPI_ISL_3881179 | 2021-09-02      |
| hCoV-19/Japan/PG-74269/2021 | EPI_ISL_3881181 | 2021-09-02      |
| hCoV-19/Japan/PG-74270/2021 | EPI_ISL_3881185 | 2021-09-02      |
| hCoV-19/Japan/PG-74271/2021 | EPI_ISL_3881187 | 2021-09-02      |
| hCoV-19/Japan/PG-74272/2021 | EPI_ISL_3881191 | 2021-09-02      |
| hCoV-19/Japan/PG-74273/2021 | EPI_ISL_3881193 | 2021-09-02      |
| hCoV-19/Japan/PG-74274/2021 | EPI_ISL_3881194 | 2021-09-02      |
| hCoV-19/Japan/PG-74275/2021 | EPI_ISL_3881196 | 2021-09-02      |
| hCoV-19/Japan/PG-74276/2021 | EPI_ISL_3881198 | 2021-09-02      |
| hCoV-19/Japan/PG-74277/2021 | EPI_ISL_3881200 | 2021-09-02      |
| hCoV-19/Japan/PG-74278/2021 | EPI_ISL_3881203 | 2021-09-02      |
| hCoV-19/Japan/PG-74279/2021 | EPI_ISL_3881206 | 2021-09-02      |
| hCoV-19/Japan/PG-74280/2021 | EPI_ISL_3881209 | 2021-09-02      |
| hCoV-19/Japan/PG-74281/2021 | EPI_ISL_3881211 | 2021-09-02      |
| hCoV-19/Japan/PG-74282/2021 | EPI_ISL_3881215 | 2021-09-02      |
| hCoV-19/Japan/PG-74283/2021 | EPI_ISL_3881217 | 2021-09-02      |
| hCoV-19/Japan/PG-74284/2021 | EPI_ISL_3881221 | 2021-09-02      |
| hCoV-19/Japan/PG-74285/2021 | EPI_ISL_3881223 | 2021-09-02      |
| hCoV-19/Japan/PG-74286/2021 | EPI_ISL_3881227 | 2021-09-02      |
| hCoV-19/Japan/PG-74287/2021 | EPI_ISL_3881231 | 2021-09-02      |
| hCoV-19/Japan/PG-74288/2021 | EPI_ISL_3881233 | 2021-09-02      |
| hCoV-19/Japan/PG-74289/2021 | EPI_ISL_3881237 | 2021-09-02      |
| hCoV-19/Japan/PG-74290/2021 | EPI_ISL_3881239 | 2021-09-02      |
| hCoV-19/Japan/PG-74291/2021 | EPI_ISL_3881242 | 2021-09-02      |
| hCoV-19/Japan/PG-74292/2021 | EPI_ISL_3881245 | 2021-09-02      |
| hCoV-19/Japan/PG-74293/2021 | EPI_ISL_3881248 | 2021-09-02      |
| hCoV-19/Japan/PG-74294/2021 | EPI_ISL_3881251 | 2021-09-02      |
| hCoV-19/Japan/PG-74295/2021 | EPI_ISL_3881254 | 2021-09-02      |
| hCoV-19/Japan/PG-74296/2021 | EPI_ISL_3881257 | 2021-09-02      |
| hCoV-19/Japan/PG-74297/2021 | EPI_ISL_3881260 | 2021-09-02      |
| hCoV-19/Japan/PG-74298/2021 | EPI_ISL_3881263 | 2021-09-02      |
| hCoV-19/Japan/PG-74299/2021 | EPI_ISL_3881265 | 2021-09-02      |
| hCoV-19/Japan/PG-74300/2021 | EPI_ISL_3881268 | 2021-09-02      |
| hCoV-19/Japan/PG-74301/2021 | EPI_ISL_3881270 | 2021-09-02      |
| hCoV-19/Japan/PG-74302/2021 | EPI_ISL_3881272 | 2021-09-02      |
| hCoV-19/Japan/PG-74303/2021 | EPI_ISL_3881275 | 2021-09-02      |
| hCoV-19/Japan/PG-74304/2021 | EPI_ISL_3881279 | 2021-09-02      |
| hCoV-19/Japan/PG-74305/2021 | EPI_ISL_3881281 | 2021-09-02      |

| virus_name                  | epiID           | submission_date |
|-----------------------------|-----------------|-----------------|
| hCoV-19/Japan/PG-74306/2021 | EPI_ISL_3881282 | 2021-09-02      |
| hCoV-19/Japan/PG-74307/2021 | EPI_ISL_3881285 | 2021-09-02      |
| hCoV-19/Japan/PG-74308/2021 | EPI_ISL_3881287 | 2021-09-02      |
| hCoV-19/Japan/PG-74309/2021 | EPI_ISL_3881290 | 2021-09-02      |
| hCoV-19/Japan/PG-74310/2021 | EPI_ISL_3881291 | 2021-09-02      |
| hCoV-19/Japan/PG-74311/2021 | EPI_ISL_3881293 | 2021-09-02      |
| hCoV-19/Japan/PG-74312/2021 | EPI_ISL_3881294 | 2021-09-02      |
| hCoV-19/Japan/PG-74313/2021 | EPI_ISL_3881296 | 2021-09-02      |
| hCoV-19/Japan/PG-74314/2021 | EPI_ISL_3881297 | 2021-09-02      |
| hCoV-19/Japan/PG-74315/2021 | EPI_ISL_3881299 | 2021-09-02      |
| hCoV-19/Japan/PG-74316/2021 | EPI_ISL_3881302 | 2021-09-02      |
| hCoV-19/Japan/PG-74317/2021 | EPI_ISL_3881306 | 2021-09-02      |
| hCoV-19/Japan/PG-74318/2021 | EPI_ISL_3881308 | 2021-09-02      |
| hCoV-19/Japan/PG-74319/2021 | EPI_ISL_3881309 | 2021-09-02      |
| hCoV-19/Japan/PG-74320/2021 | EPI_ISL_3881312 | 2021-09-02      |
| hCoV-19/Japan/PG-74321/2021 | EPI_ISL_3881317 | 2021-09-02      |
| hCoV-19/Japan/PG-74322/2021 | EPI_ISL_3881320 | 2021-09-02      |
| hCoV-19/Japan/PG-74323/2021 | EPI_ISL_3881322 | 2021-09-02      |
| hCoV-19/Japan/PG-74324/2021 | EPI_ISL_3881325 | 2021-09-02      |
| hCoV-19/Japan/PG-74325/2021 | EPI_ISL_3881327 | 2021-09-02      |
| hCoV-19/Japan/PG-74326/2021 | EPI_ISL_3881331 | 2021-09-02      |
| hCoV-19/Japan/PG-74327/2021 | EPI_ISL_3881335 | 2021-09-02      |
| hCoV-19/Japan/PG-74328/2021 | EPI_ISL_3881339 | 2021-09-02      |
| hCoV-19/Japan/PG-74329/2021 | EPI_ISL_3881343 | 2021-09-02      |
| hCoV-19/Japan/PG-74330/2021 | EPI_ISL_3881347 | 2021-09-02      |
| hCoV-19/Japan/PG-74331/2021 | EPI_ISL_3881349 | 2021-09-02      |
| hCoV-19/Japan/PG-74332/2021 | EPI_ISL_3881352 | 2021-09-02      |
| hCoV-19/Japan/PG-74333/2021 | EPI_ISL_3881354 | 2021-09-02      |
| hCoV-19/Japan/PG-74334/2021 | EPI_ISL_3881357 | 2021-09-02      |
| hCoV-19/Japan/PG-74335/2021 | EPI_ISL_3881359 | 2021-09-02      |
| hCoV-19/Japan/PG-74336/2021 | EPI_ISL_3881361 | 2021-09-02      |
| hCoV-19/Japan/PG-74337/2021 | EPI_ISL_3881362 | 2021-09-02      |
| hCoV-19/Japan/PG-74338/2021 | EPI_ISL_3881364 | 2021-09-02      |
| hCoV-19/Japan/PG-74339/2021 | EPI_ISL_3881365 | 2021-09-02      |
| hCoV-19/Japan/PG-74340/2021 | EPI_ISL_3881367 | 2021-09-02      |
| hCoV-19/Japan/PG-74341/2021 | EPI_ISL_3881369 | 2021-09-02      |
| hCoV-19/Japan/PG-74342/2021 | EPI_ISL_3881372 | 2021-09-02      |
| hCoV-19/Japan/PG-74343/2021 | EPI_ISL_3881374 | 2021-09-02      |
| hCoV-19/Japan/PG-74344/2021 | EPI_ISL_3881377 | 2021-09-02      |
| hCoV-19/Japan/PG-74345/2021 | EPI_ISL_3881379 | 2021-09-02      |
| hCoV-19/Japan/PG-74346/2021 | EPI_ISL_3881383 | 2021-09-02      |
| hCoV-19/Japan/PG-74347/2021 | EPI_ISL_3881386 | 2021-09-02      |
| hCoV-19/Japan/PG-74348/2021 | EPI_ISL_3881387 | 2021-09-02      |
| hCoV-19/Japan/PG-74349/2021 | EPI_ISL_3881390 | 2021-09-02      |
| hCoV-19/Japan/PG-74350/2021 | EPI_ISL_3881394 | 2021-09-02      |
| hCoV-19/Japan/PG-74399/2021 | EPI_ISL_3881397 | 2021-09-02      |
| hCoV-19/Japan/PG-74400/2021 | EPI_ISL_3881399 | 2021-09-02      |
| hCoV-19/Japan/PG-74401/2021 | EPI_ISL_3881402 | 2021-09-02      |
| hCoV-19/Japan/PG-74402/2021 | EPI_ISL_3881404 | 2021-09-02      |
| hCoV-19/Japan/PG-74403/2021 | EPI_ISL_3881407 | 2021-09-02      |
| hCoV-19/Japan/PG-74404/2021 | EPI_ISL_3881409 | 2021-09-02      |
| hCoV-19/Japan/PG-74405/2021 | EPI_ISL_3881412 | 2021-09-02      |
| hCoV-19/Japan/PG-74406/2021 | EPI_ISL_3881415 | 2021-09-02      |
| hCoV-19/Japan/PG-74407/2021 | EPI_ISL_3881417 | 2021-09-02      |

| virus_name                  | epiID           | submission_date |
|-----------------------------|-----------------|-----------------|
| hCoV-19/Japan/PG-74408/2021 | EPI_ISL_3881418 | 2021-09-02      |
| hCoV-19/Japan/PG-74409/2021 | EPI_ISL_3881419 | 2021-09-02      |
| hCoV-19/Japan/PG-74410/2021 | EPI_ISL_3881421 | 2021-09-02      |
| hCoV-19/Japan/PG-74411/2021 | EPI_ISL_3881422 | 2021-09-02      |
| hCoV-19/Japan/PG-74412/2021 | EPI_ISL_3881424 | 2021-09-02      |
| hCoV-19/Japan/PG-74413/2021 | EPI_ISL_3881426 | 2021-09-02      |
| hCoV-19/Japan/PG-74414/2021 | EPI_ISL_3881429 | 2021-09-02      |
| hCoV-19/Japan/PG-74415/2021 | EPI_ISL_3881432 | 2021-09-02      |
| hCoV-19/Japan/PG-74416/2021 | EPI_ISL_3881436 | 2021-09-02      |
| hCoV-19/Japan/PG-74417/2021 | EPI_ISL_3881438 | 2021-09-02      |
| hCoV-19/Japan/PG-74418/2021 | EPI_ISL_3881442 | 2021-09-02      |
| hCoV-19/Japan/PG-74419/2021 | EPI_ISL_3881445 | 2021-09-02      |
| hCoV-19/Japan/PG-74420/2021 | EPI_ISL_3881449 | 2021-09-02      |
| hCoV-19/Japan/PG-74421/2021 | EPI_ISL_3881453 | 2021-09-02      |
| hCoV-19/Japan/PG-74422/2021 | EPI_ISL_3873596 | 2021-09-02      |
| hCoV-19/Japan/PG-74423/2021 | EPI_ISL_3873597 | 2021-09-02      |
| hCoV-19/Japan/PG-74424/2021 | EPI_ISL_3873598 | 2021-09-02      |
| hCoV-19/Japan/PG-74425/2021 | EPI_ISL_3873599 | 2021-09-02      |
| hCoV-19/Japan/PG-74426/2021 | EPI_ISL_3873600 | 2021-09-02      |
| hCoV-19/Japan/PG-74427/2021 | EPI_ISL_3873601 | 2021-09-02      |
| hCoV-19/Japan/PG-74428/2021 | EPI_ISL_3873602 | 2021-09-02      |
| hCoV-19/Japan/PG-74429/2021 | EPI_ISL_3873603 | 2021-09-02      |
| hCoV-19/Japan/PG-74430/2021 | EPI_ISL_3873604 | 2021-09-02      |
| hCoV-19/Japan/PG-74431/2021 | EPI_ISL_3873605 | 2021-09-02      |
| hCoV-19/Japan/PG-74432/2021 | EPI_ISL_3873606 | 2021-09-02      |
| hCoV-19/Japan/PG-74433/2021 | EPI_ISL_3873607 | 2021-09-02      |
| hCoV-19/Japan/PG-74434/2021 | EPI_ISL_3873608 | 2021-09-02      |
| hCoV-19/Japan/PG-74435/2021 | EPI_ISL_3873609 | 2021-09-02      |
| hCoV-19/Japan/PG-74436/2021 | EPI_ISL_3873610 | 2021-09-02      |
| hCoV-19/Japan/PG-74437/2021 | EPI_ISL_3873611 | 2021-09-02      |
| hCoV-19/Japan/PG-74438/2021 | EPI_ISL_3873612 | 2021-09-02      |
| hCoV-19/Japan/PG-74439/2021 | EPI_ISL_3873613 | 2021-09-02      |
| hCoV-19/Japan/PG-74440/2021 | EPI_ISL_3873615 | 2021-09-02      |
| hCoV-19/Japan/PG-74441/2021 | EPI_ISL_3873617 | 2021-09-02      |
| hCoV-19/Japan/PG-74442/2021 | EPI_ISL_3873619 | 2021-09-02      |
| hCoV-19/Japan/PG-74443/2021 | EPI_ISL_3873621 | 2021-09-02      |
| hCoV-19/Japan/PG-74444/2021 | EPI_ISL_3873623 | 2021-09-02      |
| hCoV-19/Japan/PG-74445/2021 | EPI_ISL_3873625 | 2021-09-02      |
| hCoV-19/Japan/PG-74446/2021 | EPI_ISL_3873628 | 2021-09-02      |
| hCoV-19/Japan/PG-74447/2021 | EPI_ISL_3873629 | 2021-09-02      |
| hCoV-19/Japan/PG-74448/2021 | EPI_ISL_3873631 | 2021-09-02      |
| hCoV-19/Japan/PG-74449/2021 | EPI_ISL_3873633 | 2021-09-02      |
| hCoV-19/Japan/PG-74450/2021 | EPI_ISL_3873634 | 2021-09-02      |
| hCoV-19/Japan/PG-74451/2021 | EPI_ISL_3873636 | 2021-09-02      |
| hCoV-19/Japan/PG-74452/2021 | EPI_ISL_3873638 | 2021-09-02      |
| hCoV-19/Japan/PG-74453/2021 | EPI_ISL_3873640 | 2021-09-02      |
| hCoV-19/Japan/PG-74454/2021 | EPI_ISL_3873642 | 2021-09-02      |
| hCoV-19/Japan/PG-74455/2021 | EPI_ISL_3873645 | 2021-09-02      |
| hCoV-19/Japan/PG-74456/2021 | EPI_ISL_3873647 | 2021-09-02      |
| hCoV-19/Japan/PG-74457/2021 | EPI_ISL_3873649 | 2021-09-02      |
| hCoV-19/Japan/PG-74458/2021 | EPI_ISL_3873651 | 2021-09-02      |
| hCoV-19/Japan/PG-74459/2021 | EPI_ISL_3873653 | 2021-09-02      |
| hCoV-19/Japan/PG-74460/2021 | EPI_ISL_3873655 | 2021-09-02      |
| hCoV-19/Japan/PG-74461/2021 | EPI_ISL_3873657 | 2021-09-02      |

| virus_name                  | epiID           | submission_date |
|-----------------------------|-----------------|-----------------|
| hCoV-19/Japan/PG-74462/2021 | EPI_ISL_3871395 | 2021-09-02      |
| hCoV-19/Japan/PG-74463/2021 | EPI_ISL_3871396 | 2021-09-02      |
| hCoV-19/Japan/PG-74464/2021 | EPI_ISL_3871397 | 2021-09-02      |
| hCoV-19/Japan/PG-74465/2021 | EPI_ISL_3871398 | 2021-09-02      |
| hCoV-19/Japan/PG-74466/2021 | EPI_ISL_3871399 | 2021-09-02      |
| hCoV-19/Japan/PG-74467/2021 | EPI_ISL_3871400 | 2021-09-02      |
| hCoV-19/Japan/PG-74468/2021 | EPI_ISL_3871401 | 2021-09-02      |
| hCoV-19/Japan/PG-74469/2021 | EPI_ISL_3871402 | 2021-09-02      |
| hCoV-19/Japan/PG-74470/2021 | EPI_ISL_3871403 | 2021-09-02      |
| hCoV-19/Japan/PG-74471/2021 | EPI_ISL_3871404 | 2021-09-02      |
| hCoV-19/Japan/PG-74472/2021 | EPI_ISL_3871405 | 2021-09-02      |
| hCoV-19/Japan/PG-74473/2021 | EPI_ISL_3871406 | 2021-09-02      |
| hCoV-19/Japan/PG-74474/2021 | EPI_ISL_3871407 | 2021-09-02      |
| hCoV-19/Japan/PG-74475/2021 | EPI_ISL_3871408 | 2021-09-02      |
| hCoV-19/Japan/PG-74476/2021 | EPI_ISL_3871409 | 2021-09-02      |
| hCoV-19/Japan/PG-74477/2021 | EPI_ISL_3871410 | 2021-09-02      |
| hCoV-19/Japan/PG-74478/2021 | EPI_ISL_3871411 | 2021-09-02      |
| hCoV-19/Japan/PG-74479/2021 | EPI_ISL_3871412 | 2021-09-02      |
| hCoV-19/Japan/PG-74480/2021 | EPI_ISL_3871413 | 2021-09-02      |
| hCoV-19/Japan/PG-74481/2021 | EPI_ISL_3871414 | 2021-09-02      |
| hCoV-19/Japan/PG-74482/2021 | EPI_ISL_3876022 | 2021-09-02      |
| hCoV-19/Japan/PG-74483/2021 | EPI_ISL_3876023 | 2021-09-02      |
| hCoV-19/Japan/PG-74484/2021 | EPI_ISL_3876024 | 2021-09-02      |
| hCoV-19/Japan/PG-74485/2021 | EPI_ISL_3876025 | 2021-09-02      |
| hCoV-19/Japan/PG-74486/2021 | EPI_ISL_3876026 | 2021-09-02      |
| hCoV-19/Japan/PG-74487/2021 | EPI_ISL_3876027 | 2021-09-02      |
| hCoV-19/Japan/PG-74488/2021 | EPI_ISL_3876028 | 2021-09-02      |
| hCoV-19/Japan/PG-74489/2021 | EPI_ISL_3876029 | 2021-09-02      |
| hCoV-19/Japan/PG-74490/2021 | EPI_ISL_3876030 | 2021-09-02      |
| hCoV-19/Japan/PG-74491/2021 | EPI_ISL_3876031 | 2021-09-02      |
| hCoV-19/Japan/PG-74492/2021 | EPI_ISL_3876032 | 2021-09-02      |
| hCoV-19/Japan/PG-74493/2021 | EPI_ISL_3876033 | 2021-09-02      |
| hCoV-19/Japan/PG-74494/2021 | EPI_ISL_3876034 | 2021-09-02      |
| hCoV-19/Japan/PG-74495/2021 | EPI_ISL_3876035 | 2021-09-02      |
| hCoV-19/Japan/PG-74496/2021 | EPI_ISL_3876036 | 2021-09-02      |
| hCoV-19/Japan/PG-74497/2021 | EPI_ISL_3876037 | 2021-09-02      |
| hCoV-19/Japan/PG-74498/2021 | EPI_ISL_3876038 | 2021-09-02      |
| hCoV-19/Japan/PG-74499/2021 | EPI_ISL_3876039 | 2021-09-02      |
| hCoV-19/Japan/PG-74500/2021 | EPI_ISL_3876040 | 2021-09-02      |
| hCoV-19/Japan/PG-74501/2021 | EPI_ISL_3876041 | 2021-09-02      |
| hCoV-19/Japan/PG-74502/2021 | EPI_ISL_3876042 | 2021-09-02      |
| hCoV-19/Japan/PG-74503/2021 | EPI_ISL_3876043 | 2021-09-02      |
| hCoV-19/Japan/PG-74504/2021 | EPI_ISL_3876044 | 2021-09-02      |
| hCoV-19/Japan/PG-74505/2021 | EPI_ISL_3875760 | 2021-09-02      |
| hCoV-19/Japan/PG-74506/2021 | EPI_ISL_3875763 | 2021-09-02      |
| hCoV-19/Japan/PG-74507/2021 | EPI_ISL_3875767 | 2021-09-02      |
| hCoV-19/Japan/PG-74508/2021 | EPI_ISL_3875770 | 2021-09-02      |
| hCoV-19/Japan/PG-74509/2021 | EPI_ISL_3875773 | 2021-09-02      |
| hCoV-19/Japan/PG-74510/2021 | EPI_ISL_3875776 | 2021-09-02      |
| hCoV-19/Japan/PG-74511/2021 | EPI_ISL_3875780 | 2021-09-02      |
| hCoV-19/Japan/PG-74512/2021 | EPI_ISL_3875783 | 2021-09-02      |
| hCoV-19/Japan/PG-74513/2021 | EPI_ISL_3875786 | 2021-09-02      |
| hCoV-19/Japan/PG-74514/2021 | EPI_ISL_3875788 | 2021-09-02      |
| hCoV-19/Japan/PG-74515/2021 | EPI_ISL_3875792 | 2021-09-02      |

| virus_name                  | epiID           | submission_date |
|-----------------------------|-----------------|-----------------|
| hCoV-19/Japan/PG-74516/2021 | EPI_ISL_3875795 | 2021-09-02      |
| hCoV-19/Japan/PG-74517/2021 | EPI_ISL_3875798 | 2021-09-02      |
| hCoV-19/Japan/PG-74518/2021 | EPI_ISL_3875801 | 2021-09-02      |
| hCoV-19/Japan/PG-74519/2021 | EPI_ISL_3875804 | 2021-09-02      |
| hCoV-19/Japan/PG-74520/2021 | EPI_ISL_3875807 | 2021-09-02      |
| hCoV-19/Japan/PG-74521/2021 | EPI_ISL_3875810 | 2021-09-02      |
| hCoV-19/Japan/PG-74522/2021 | EPI_ISL_3875814 | 2021-09-02      |
| hCoV-19/Japan/PG-74523/2021 | EPI_ISL_3875817 | 2021-09-02      |
| hCoV-19/Japan/PG-74524/2021 | EPI_ISL_3875820 | 2021-09-02      |
| hCoV-19/Japan/PG-74525/2021 | EPI_ISL_3875823 | 2021-09-02      |
| hCoV-19/Japan/PG-74526/2021 | EPI_ISL_3873423 | 2021-09-02      |
| hCoV-19/Japan/PG-74527/2021 | EPI_ISL_3873424 | 2021-09-02      |
| hCoV-19/Japan/PG-74528/2021 | EPI_ISL_3873425 | 2021-09-02      |
| hCoV-19/Japan/PG-74529/2021 | EPI_ISL_3873426 | 2021-09-02      |
| hCoV-19/Japan/PG-74530/2021 | EPI_ISL_3873427 | 2021-09-02      |
| hCoV-19/Japan/PG-74531/2021 | EPI_ISL_3873428 | 2021-09-02      |
| hCoV-19/Japan/PG-74532/2021 | EPI_ISL_3873429 | 2021-09-02      |
| hCoV-19/Japan/PG-74533/2021 | EPI_ISL_3873430 | 2021-09-02      |
| hCoV-19/Japan/PG-74534/2021 | EPI_ISL_3873431 | 2021-09-02      |
| hCoV-19/Japan/PG-74535/2021 | EPI_ISL_3873432 | 2021-09-02      |
| hCoV-19/Japan/PG-74536/2021 | EPI_ISL_3871364 | 2021-09-02      |
| hCoV-19/Japan/PG-74537/2021 | EPI_ISL_3871365 | 2021-09-02      |
| hCoV-19/Japan/PG-74538/2021 | EPI_ISL_3871366 | 2021-09-02      |
| hCoV-19/Japan/PG-74539/2021 | EPI_ISL_3871367 | 2021-09-02      |
| hCoV-19/Japan/PG-74540/2021 | EPI_ISL_3871368 | 2021-09-02      |
| hCoV-19/Japan/PG-74541/2021 | EPI_ISL_3871876 | 2021-09-02      |
| hCoV-19/Japan/PG-74542/2021 | EPI_ISL_3871877 | 2021-09-02      |
| hCoV-19/Japan/PG-74543/2021 | EPI_ISL_3871878 | 2021-09-02      |
| hCoV-19/Japan/PG-74544/2021 | EPI_ISL_3871879 | 2021-09-02      |
| hCoV-19/Japan/PG-74545/2021 | EPI_ISL_3871880 | 2021-09-02      |
| hCoV-19/Japan/PG-74546/2021 | EPI_ISL_3871881 | 2021-09-02      |
| hCoV-19/Japan/PG-74547/2021 | EPI_ISL_3871882 | 2021-09-02      |
| hCoV-19/Japan/PG-74548/2021 | EPI_ISL_3871883 | 2021-09-02      |
| hCoV-19/Japan/PG-74549/2021 | EPI_ISL_3871884 | 2021-09-02      |
| hCoV-19/Japan/PG-74550/2021 | EPI_ISL_3871885 | 2021-09-02      |
| hCoV-19/Japan/PG-74551/2021 | EPI_ISL_3871886 | 2021-09-02      |
| hCoV-19/Japan/PG-74552/2021 | EPI_ISL_3871887 | 2021-09-02      |
| hCoV-19/Japan/PG-74553/2021 | EPI_ISL_3871888 | 2021-09-02      |
| hCoV-19/Japan/PG-74554/2021 | EPI_ISL_3871889 | 2021-09-02      |
| hCoV-19/Japan/PG-74555/2021 | EPI_ISL_3871890 | 2021-09-02      |
| hCoV-19/Japan/PG-74556/2021 | EPI_ISL_3871891 | 2021-09-02      |
| hCoV-19/Japan/PG-74557/2021 | EPI_ISL_3871892 | 2021-09-02      |
| hCoV-19/Japan/PG-74558/2021 | EPI_ISL_3871893 | 2021-09-02      |
| hCoV-19/Japan/PG-74559/2021 | EPI_ISL_3871894 | 2021-09-02      |
| hCoV-19/Japan/PG-74560/2021 | EPI_ISL_3871895 | 2021-09-02      |
| hCoV-19/Japan/PG-74561/2021 | EPI_ISL_3871896 | 2021-09-02      |
| hCoV-19/Japan/PG-74562/2021 | EPI_ISL_3871897 | 2021-09-02      |
| hCoV-19/Japan/PG-74563/2021 | EPI_ISL_3871898 | 2021-09-02      |
| hCoV-19/Japan/PG-74564/2021 | EPI_ISL_3871899 | 2021-09-02      |
| hCoV-19/Japan/PG-74565/2021 | EPI_ISL_3871683 | 2021-09-02      |
| hCoV-19/Japan/PG-74566/2021 | EPI_ISL_3871684 | 2021-09-02      |
| hCoV-19/Japan/PG-74567/2021 | EPI_ISL_3871685 | 2021-09-02      |
| hCoV-19/Japan/PG-74568/2021 | EPI_ISL_3871686 | 2021-09-02      |
| hCoV-19/Japan/PG-74569/2021 | EPI_ISL_3871687 | 2021-09-02      |



| virus_name                  | epiID           | submission_date |
|-----------------------------|-----------------|-----------------|
| hCoV-19/Japan/PG-74570/2021 | EPI_ISL_3871491 | 2021-09-02      |
| hCoV-19/Japan/PG-74571/2021 | EPI_ISL_3871492 | 2021-09-02      |
| hCoV-19/Japan/PG-74572/2021 | EPI_ISL_3871493 | 2021-09-02      |
| hCoV-19/Japan/PG-74573/2021 | EPI_ISL_3871494 | 2021-09-02      |
| hCoV-19/Japan/PG-74574/2021 | EPI_ISL_3871495 | 2021-09-02      |
| hCoV-19/Japan/PG-74575/2021 | EPI_ISL_3871496 | 2021-09-02      |
| hCoV-19/Japan/PG-74576/2021 | EPI_ISL_3871497 | 2021-09-02      |
| hCoV-19/Japan/PG-74577/2021 | EPI_ISL_3871498 | 2021-09-02      |
| hCoV-19/Japan/PG-74578/2021 | EPI_ISL_3871499 | 2021-09-02      |
| hCoV-19/Japan/PG-74579/2021 | EPI_ISL_3871500 | 2021-09-02      |
| hCoV-19/Japan/PG-74580/2021 | EPI_ISL_3871501 | 2021-09-02      |
| hCoV-19/Japan/PG-74581/2021 | EPI_ISL_3871502 | 2021-09-02      |
| hCoV-19/Japan/PG-74582/2021 | EPI_ISL_3871503 | 2021-09-02      |
| hCoV-19/Japan/PG-74583/2021 | EPI_ISL_3871504 | 2021-09-02      |
| hCoV-19/Japan/PG-74584/2021 | EPI_ISL_3871505 | 2021-09-02      |
| hCoV-19/Japan/PG-74585/2021 | EPI_ISL_3871013 | 2021-09-02      |
| hCoV-19/Japan/PG-74586/2021 | EPI_ISL_3871014 | 2021-09-02      |
| hCoV-19/Japan/PG-74587/2021 | EPI_ISL_3871015 | 2021-09-02      |
| hCoV-19/Japan/PG-74588/2021 | EPI_ISL_3871016 | 2021-09-02      |
| hCoV-19/Japan/PG-74589/2021 | EPI_ISL_3871017 | 2021-09-02      |
| hCoV-19/Japan/PG-74590/2021 | EPI_ISL_3871212 | 2021-09-02      |
| hCoV-19/Japan/PG-74591/2021 | EPI_ISL_3871213 | 2021-09-02      |
| hCoV-19/Japan/PG-74592/2021 | EPI_ISL_3871214 | 2021-09-02      |
| hCoV-19/Japan/PG-74593/2021 | EPI_ISL_3871215 | 2021-09-02      |
| hCoV-19/Japan/PG-74594/2021 | EPI_ISL_3871216 | 2021-09-02      |
| hCoV-19/Japan/PG-74595/2021 | EPI_ISL_3871217 | 2021-09-02      |
| hCoV-19/Japan/PG-74596/2021 | EPI_ISL_3871218 | 2021-09-02      |
| hCoV-19/Japan/PG-74597/2021 | EPI_ISL_3871219 | 2021-09-02      |
| hCoV-19/Japan/PG-74598/2021 | EPI_ISL_3871220 | 2021-09-02      |
| hCoV-19/Japan/PG-74599/2021 | EPI_ISL_3871221 | 2021-09-02      |
| hCoV-19/Japan/PG-74600/2021 | EPI_ISL_3871222 | 2021-09-02      |
| hCoV-19/Japan/PG-74601/2021 | EPI_ISL_3871223 | 2021-09-02      |
| hCoV-19/Japan/PG-74602/2021 | EPI_ISL_3871224 | 2021-09-02      |
| hCoV-19/Japan/PG-74603/2021 | EPI_ISL_3871225 | 2021-09-02      |
| hCoV-19/Japan/PG-74604/2021 | EPI_ISL_3871226 | 2021-09-02      |
| hCoV-19/Japan/PG-74605/2021 | EPI_ISL_3871227 | 2021-09-02      |
| hCoV-19/Japan/PG-74606/2021 | EPI_ISL_3871228 | 2021-09-02      |
| hCoV-19/Japan/PG-74607/2021 | EPI_ISL_3871229 | 2021-09-02      |
| hCoV-19/Japan/PG-74608/2021 | EPI_ISL_3871230 | 2021-09-02      |
| hCoV-19/Japan/PG-74609/2021 | EPI_ISL_3871231 | 2021-09-02      |
| hCoV-19/Japan/PG-74610/2021 | EPI_ISL_3871232 | 2021-09-02      |
| hCoV-19/Japan/PG-74611/2021 | EPI_ISL_3871233 | 2021-09-02      |
| hCoV-19/Japan/PG-74612/2021 | EPI_ISL_3871234 | 2021-09-02      |
| hCoV-19/Japan/PG-74613/2021 | EPI_ISL_3871235 | 2021-09-02      |
| hCoV-19/Japan/PG-74614/2021 | EPI_ISL_3872125 | 2021-09-02      |
| hCoV-19/Japan/PG-74615/2021 | EPI_ISL_3872126 | 2021-09-02      |
| hCoV-19/Japan/PG-74616/2021 | EPI_ISL_3872127 | 2021-09-02      |
| hCoV-19/Japan/PG-74617/2021 | EPI_ISL_3872128 | 2021-09-02      |
| hCoV-19/Japan/PG-74618/2021 | EPI_ISL_3872129 | 2021-09-02      |
| hCoV-19/Japan/PG-74619/2021 | EPI_ISL_3872130 | 2021-09-02      |
| hCoV-19/Japan/PG-74620/2021 | EPI_ISL_3872131 | 2021-09-02      |
| hCoV-19/Japan/PG-74621/2021 | EPI_ISL_3872132 | 2021-09-02      |
| hCoV-19/Japan/PG-74622/2021 | EPI_ISL_3872133 | 2021-09-02      |
| hCoV-19/Japan/PG-74623/2021 | EPI_ISL_3872134 | 2021-09-02      |

| virus_name                  | epiID           | submission_date |
|-----------------------------|-----------------|-----------------|
| hCoV-19/Japan/PG-74624/2021 | EPI_ISL_3872135 | 2021-09-02      |
| hCoV-19/Japan/PG-74625/2021 | EPI_ISL_3874400 | 2021-09-02      |
| hCoV-19/Japan/PG-74626/2021 | EPI_ISL_3874401 | 2021-09-02      |
| hCoV-19/Japan/PG-74627/2021 | EPI_ISL_3874402 | 2021-09-02      |
| hCoV-19/Japan/PG-74628/2021 | EPI_ISL_3874403 | 2021-09-02      |
| hCoV-19/Japan/PG-74629/2021 | EPI_ISL_3874404 | 2021-09-02      |
| hCoV-19/Japan/PG-74630/2021 | EPI_ISL_3874405 | 2021-09-02      |
| hCoV-19/Japan/PG-74631/2021 | EPI_ISL_3874406 | 2021-09-02      |
| hCoV-19/Japan/PG-74632/2021 | EPI_ISL_3874407 | 2021-09-02      |
| hCoV-19/Japan/PG-74633/2021 | EPI_ISL_3874408 | 2021-09-02      |
| hCoV-19/Japan/PG-74634/2021 | EPI_ISL_3874409 | 2021-09-02      |
| hCoV-19/Japan/PG-74635/2021 | EPI_ISL_3874410 | 2021-09-02      |
| hCoV-19/Japan/PG-74636/2021 | EPI_ISL_3874411 | 2021-09-02      |
| hCoV-19/Japan/PG-74637/2021 | EPI_ISL_3874412 | 2021-09-02      |
| hCoV-19/Japan/PG-74638/2021 | EPI_ISL_3874413 | 2021-09-02      |
| hCoV-19/Japan/PG-74639/2021 | EPI_ISL_3874414 | 2021-09-02      |
| hCoV-19/Japan/PG-74640/2021 | EPI_ISL_3874415 | 2021-09-02      |
| hCoV-19/Japan/PG-74641/2021 | EPI_ISL_3874416 | 2021-09-02      |
| hCoV-19/Japan/PG-74642/2021 | EPI_ISL_3874417 | 2021-09-02      |
| hCoV-19/Japan/PG-74643/2021 | EPI_ISL_3874418 | 2021-09-02      |
| hCoV-19/Japan/PG-74644/2021 | EPI_ISL_3874419 | 2021-09-02      |
| hCoV-19/Japan/PG-74645/2021 | EPI_ISL_3874420 | 2021-09-02      |
| hCoV-19/Japan/PG-74646/2021 | EPI_ISL_3874421 | 2021-09-02      |
| hCoV-19/Japan/PG-74647/2021 | EPI_ISL_3870958 | 2021-09-02      |
| hCoV-19/Japan/PG-74648/2021 | EPI_ISL_3870959 | 2021-09-02      |
| hCoV-19/Japan/PG-74649/2021 | EPI_ISL_3870960 | 2021-09-02      |
| hCoV-19/Japan/PG-74650/2021 | EPI_ISL_3870961 | 2021-09-02      |
| hCoV-19/Japan/PG-74651/2021 | EPI_ISL_3870962 | 2021-09-02      |
| hCoV-19/Japan/PG-74652/2021 | EPI_ISL_3870963 | 2021-09-02      |
| hCoV-19/Japan/PG-74653/2021 | EPI_ISL_3872151 | 2021-09-02      |
| hCoV-19/Japan/PG-74654/2021 | EPI_ISL_3872152 | 2021-09-02      |
| hCoV-19/Japan/PG-74655/2021 | EPI_ISL_3872156 | 2021-09-02      |
| hCoV-19/Japan/PG-74656/2021 | EPI_ISL_3872153 | 2021-09-02      |
| hCoV-19/Japan/PG-74657/2021 | EPI_ISL_3872154 | 2021-09-02      |
| hCoV-19/Japan/PG-74658/2021 | EPI_ISL_3872155 | 2021-09-02      |
| hCoV-19/Japan/PG-74661/2021 | EPI_ISL_3872246 | 2021-09-02      |
| hCoV-19/Japan/PG-74662/2021 | EPI_ISL_3872247 | 2021-09-02      |
| hCoV-19/Japan/PG-74663/2021 | EPI_ISL_3872248 | 2021-09-02      |
| hCoV-19/Japan/PG-74664/2021 | EPI_ISL_3872249 | 2021-09-02      |
| hCoV-19/Japan/PG-74665/2021 | EPI_ISL_3872250 | 2021-09-02      |
| hCoV-19/Japan/PG-74666/2021 | EPI_ISL_3872251 | 2021-09-02      |
| hCoV-19/Japan/PG-74667/2021 | EPI_ISL_3872252 | 2021-09-02      |
| hCoV-19/Japan/PG-74668/2021 | EPI_ISL_3872253 | 2021-09-02      |
| hCoV-19/Japan/PG-74669/2021 | EPI_ISL_3872254 | 2021-09-02      |
| hCoV-19/Japan/PG-74670/2021 | EPI_ISL_3872255 | 2021-09-02      |
| hCoV-19/Japan/PG-74671/2021 | EPI_ISL_3872256 | 2021-09-02      |
| hCoV-19/Japan/PG-74672/2021 | EPI_ISL_3872257 | 2021-09-02      |
| hCoV-19/Japan/PG-74673/2021 | EPI_ISL_3872258 | 2021-09-02      |
| hCoV-19/Japan/PG-74674/2021 | EPI_ISL_3872259 | 2021-09-02      |
| hCoV-19/Japan/PG-74675/2021 | EPI_ISL_3881454 | 2021-09-02      |
| hCoV-19/Japan/PG-74676/2021 | EPI_ISL_3881456 | 2021-09-02      |
| hCoV-19/Japan/PG-74677/2021 | EPI_ISL_3881462 | 2021-09-02      |
| hCoV-19/Japan/PG-74678/2021 | EPI_ISL_3881466 | 2021-09-02      |
| hCoV-19/Japan/PG-74679/2021 | EPI_ISL_3881469 | 2021-09-02      |

| virus_name                  | epiID           | submission_date |
|-----------------------------|-----------------|-----------------|
| hCoV-19/Japan/PG-74680/2021 | EPI_ISL_3881471 | 2021-09-02      |
| hCoV-19/Japan/PG-74681/2021 | EPI_ISL_3881475 | 2021-09-02      |
| hCoV-19/Japan/PG-74682/2021 | EPI_ISL_3881480 | 2021-09-02      |
| hCoV-19/Japan/PG-74683/2021 | EPI_ISL_3881484 | 2021-09-02      |
| hCoV-19/Japan/PG-74684/2021 | EPI_ISL_3881489 | 2021-09-02      |
| hCoV-19/Japan/PG-74685/2021 | EPI_ISL_3881494 | 2021-09-02      |
| hCoV-19/Japan/PG-74686/2021 | EPI_ISL_3881498 | 2021-09-02      |
| hCoV-19/Japan/PG-74687/2021 | EPI_ISL_3881503 | 2021-09-02      |
| hCoV-19/Japan/PG-74688/2021 | EPI_ISL_3881507 | 2021-09-02      |
| hCoV-19/Japan/PG-74689/2021 | EPI_ISL_3881512 | 2021-09-02      |
| hCoV-19/Japan/PG-74690/2021 | EPI_ISL_3881515 | 2021-09-02      |
| hCoV-19/Japan/PG-74691/2021 | EPI_ISL_3881519 | 2021-09-02      |
| hCoV-19/Japan/PG-74692/2021 | EPI_ISL_3881523 | 2021-09-02      |
| hCoV-19/Japan/PG-74693/2021 | EPI_ISL_3881527 | 2021-09-02      |
| hCoV-19/Japan/PG-74694/2021 | EPI_ISL_3881530 | 2021-09-02      |
| hCoV-19/Japan/PG-74695/2021 | EPI_ISL_3881533 | 2021-09-02      |
| hCoV-19/Japan/PG-74696/2021 | EPI_ISL_3881537 | 2021-09-02      |
| hCoV-19/Japan/PG-74697/2021 | EPI_ISL_3881541 | 2021-09-02      |
| hCoV-19/Japan/PG-74698/2021 | EPI_ISL_3881546 | 2021-09-02      |
| hCoV-19/Japan/PG-74699/2021 | EPI_ISL_3881549 | 2021-09-02      |
| hCoV-19/Japan/PG-74700/2021 | EPI_ISL_3881552 | 2021-09-02      |
| hCoV-19/Japan/PG-74701/2021 | EPI_ISL_3881557 | 2021-09-02      |
| hCoV-19/Japan/PG-74702/2021 | EPI_ISL_3881561 | 2021-09-02      |
| hCoV-19/Japan/PG-74703/2021 | EPI_ISL_3881565 | 2021-09-02      |
| hCoV-19/Japan/PG-74704/2021 | EPI_ISL_3881570 | 2021-09-02      |
| hCoV-19/Japan/PG-74705/2021 | EPI_ISL_3881571 | 2021-09-02      |
| hCoV-19/Japan/PG-74706/2021 | EPI_ISL_3881573 | 2021-09-02      |
| hCoV-19/Japan/PG-74707/2021 | EPI_ISL_3881574 | 2021-09-02      |
| hCoV-19/Japan/PG-74708/2021 | EPI_ISL_3881578 | 2021-09-02      |
| hCoV-19/Japan/PG-74709/2021 | EPI_ISL_3881582 | 2021-09-02      |
| hCoV-19/Japan/PG-74710/2021 | EPI_ISL_3881585 | 2021-09-02      |
| hCoV-19/Japan/PG-74711/2021 | EPI_ISL_3881589 | 2021-09-02      |
| hCoV-19/Japan/PG-74712/2021 | EPI_ISL_3881592 | 2021-09-02      |
| hCoV-19/Japan/PG-74713/2021 | EPI_ISL_3881596 | 2021-09-02      |
| hCoV-19/Japan/PG-74714/2021 | EPI_ISL_3881600 | 2021-09-02      |
| hCoV-19/Japan/PG-74715/2021 | EPI_ISL_3881602 | 2021-09-02      |
| hCoV-19/Japan/PG-74716/2021 | EPI_ISL_3881604 | 2021-09-02      |
| hCoV-19/Japan/PG-74717/2021 | EPI_ISL_3881607 | 2021-09-02      |
| hCoV-19/Japan/PG-74718/2021 | EPI_ISL_3881612 | 2021-09-02      |
| hCoV-19/Japan/PG-74719/2021 | EPI_ISL_3881616 | 2021-09-02      |
| hCoV-19/Japan/PG-74720/2021 | EPI_ISL_3881619 | 2021-09-02      |
| hCoV-19/Japan/PG-74721/2021 | EPI_ISL_3881621 | 2021-09-02      |
| hCoV-19/Japan/PG-74722/2021 | EPI_ISL_3881623 | 2021-09-02      |
| hCoV-19/Japan/PG-74723/2021 | EPI_ISL_3881625 | 2021-09-02      |
| hCoV-19/Japan/PG-74724/2021 | EPI_ISL_3881629 | 2021-09-02      |
| hCoV-19/Japan/PG-74725/2021 | EPI_ISL_3881632 | 2021-09-02      |
| hCoV-19/Japan/PG-74726/2021 | EPI_ISL_3881634 | 2021-09-02      |
| hCoV-19/Japan/PG-74727/2021 | EPI_ISL_3881636 | 2021-09-02      |
| hCoV-19/Japan/PG-74728/2021 | EPI_ISL_3881638 | 2021-09-02      |
| hCoV-19/Japan/PG-74729/2021 | EPI_ISL_3881639 | 2021-09-02      |
| hCoV-19/Japan/PG-74730/2021 | EPI_ISL_3881642 | 2021-09-02      |
| hCoV-19/Japan/PG-74731/2021 | EPI_ISL_3881644 | 2021-09-02      |
| hCoV-19/Japan/PG-74732/2021 | EPI_ISL_3881646 | 2021-09-02      |
| hCoV-19/Japan/PG-74733/2021 | EPI_ISL_3881647 | 2021-09-02      |

| virus_name                  | epiID           | submission_date |
|-----------------------------|-----------------|-----------------|
| hCoV-19/Japan/PG-74734/2021 | EPI_ISL_3881650 | 2021-09-02      |
| hCoV-19/Japan/PG-74735/2021 | EPI_ISL_3881652 | 2021-09-02      |
| hCoV-19/Japan/PG-74736/2021 | EPI_ISL_3881657 | 2021-09-02      |
| hCoV-19/Japan/PG-74737/2021 | EPI_ISL_3881661 | 2021-09-02      |
| hCoV-19/Japan/PG-74738/2021 | EPI_ISL_3881664 | 2021-09-02      |
| hCoV-19/Japan/PG-74739/2021 | EPI_ISL_3881668 | 2021-09-02      |
| hCoV-19/Japan/PG-74740/2021 | EPI_ISL_3881672 | 2021-09-02      |
| hCoV-19/Japan/PG-74741/2021 | EPI_ISL_3881675 | 2021-09-02      |
| hCoV-19/Japan/PG-74742/2021 | EPI_ISL_3881680 | 2021-09-02      |
| hCoV-19/Japan/PG-74743/2021 | EPI_ISL_3881684 | 2021-09-02      |
| hCoV-19/Japan/PG-74744/2021 | EPI_ISL_3881687 | 2021-09-02      |
| hCoV-19/Japan/PG-74745/2021 | EPI_ISL_3881691 | 2021-09-02      |
| hCoV-19/Japan/PG-74746/2021 | EPI_ISL_3881693 | 2021-09-02      |
| hCoV-19/Japan/PG-74747/2021 | EPI_ISL_3881695 | 2021-09-02      |
| hCoV-19/Japan/PG-74748/2021 | EPI_ISL_3881700 | 2021-09-02      |
| hCoV-19/Japan/PG-74749/2021 | EPI_ISL_3881703 | 2021-09-02      |
| hCoV-19/Japan/PG-74750/2021 | EPI_ISL_3881705 | 2021-09-02      |
| hCoV-19/Japan/PG-74751/2021 | EPI_ISL_3881709 | 2021-09-02      |
| hCoV-19/Japan/PG-74752/2021 | EPI_ISL_3881714 | 2021-09-02      |
| hCoV-19/Japan/PG-74753/2021 | EPI_ISL_3881716 | 2021-09-02      |
| hCoV-19/Japan/PG-74754/2021 | EPI_ISL_3881723 | 2021-09-02      |
| hCoV-19/Japan/PG-74755/2021 | EPI_ISL_3881725 | 2021-09-02      |
| hCoV-19/Japan/PG-74756/2021 | EPI_ISL_3881726 | 2021-09-02      |
| hCoV-19/Japan/PG-74757/2021 | EPI_ISL_3881729 | 2021-09-02      |
| hCoV-19/Japan/PG-74758/2021 | EPI_ISL_3881733 | 2021-09-02      |
| hCoV-19/Japan/PG-74759/2021 | EPI_ISL_3881736 | 2021-09-02      |
| hCoV-19/Japan/PG-74760/2021 | EPI_ISL_3881740 | 2021-09-02      |
| hCoV-19/Japan/PG-74761/2021 | EPI_ISL_3881742 | 2021-09-02      |
| hCoV-19/Japan/PG-74762/2021 | EPI_ISL_3881744 | 2021-09-02      |
| hCoV-19/Japan/PG-74763/2021 | EPI_ISL_3881746 | 2021-09-02      |
| hCoV-19/Japan/PG-74764/2021 | EPI_ISL_3881750 | 2021-09-02      |
| hCoV-19/Japan/PG-74765/2021 | EPI_ISL_3881753 | 2021-09-02      |
| hCoV-19/Japan/PG-74766/2021 | EPI_ISL_3881755 | 2021-09-02      |
| hCoV-19/Japan/PG-74767/2021 | EPI_ISL_3881757 | 2021-09-02      |
| hCoV-19/Japan/PG-74768/2021 | EPI_ISL_3881761 | 2021-09-02      |
| hCoV-19/Japan/PG-74769/2021 | EPI_ISL_3881765 | 2021-09-02      |
| hCoV-19/Japan/PG-74770/2021 | EPI_ISL_3881769 | 2021-09-02      |
| hCoV-19/Japan/PG-74771/2021 | EPI_ISL_3881771 | 2021-09-02      |
| hCoV-19/Japan/PG-74772/2021 | EPI_ISL_3881773 | 2021-09-02      |
| hCoV-19/Japan/PG-74773/2021 | EPI_ISL_3881775 | 2021-09-02      |
| hCoV-19/Japan/PG-74774/2021 | EPI_ISL_3881778 | 2021-09-02      |
| hCoV-19/Japan/PG-74775/2021 | EPI_ISL_3881782 | 2021-09-02      |
| hCoV-19/Japan/PG-74776/2021 | EPI_ISL_3881786 | 2021-09-02      |
| hCoV-19/Japan/PG-74777/2021 | EPI_ISL_3881790 | 2021-09-02      |
| hCoV-19/Japan/PG-74778/2021 | EPI_ISL_3881792 | 2021-09-02      |
| hCoV-19/Japan/PG-74779/2021 | EPI_ISL_3881795 | 2021-09-02      |
| hCoV-19/Japan/PG-74780/2021 | EPI_ISL_3881798 | 2021-09-02      |
| hCoV-19/Japan/PG-74781/2021 | EPI_ISL_3881801 | 2021-09-02      |
| hCoV-19/Japan/PG-74782/2021 | EPI_ISL_3881802 | 2021-09-02      |
| hCoV-19/Japan/PG-74783/2021 | EPI_ISL_3881805 | 2021-09-02      |
| hCoV-19/Japan/PG-74784/2021 | EPI_ISL_3881806 | 2021-09-02      |
| hCoV-19/Japan/PG-74785/2021 | EPI_ISL_3881809 | 2021-09-02      |
| hCoV-19/Japan/PG-74786/2021 | EPI_ISL_3881811 | 2021-09-02      |
| hCoV-19/Japan/PG-74787/2021 | EPI_ISL_3881813 | 2021-09-02      |

| virus_name                  | epiID           | submission_date |
|-----------------------------|-----------------|-----------------|
| hCoV-19/Japan/PG-74788/2021 | EPI_ISL_3881814 | 2021-09-02      |
| hCoV-19/Japan/PG-74789/2021 | EPI_ISL_3881816 | 2021-09-02      |
| hCoV-19/Japan/PG-74790/2021 | EPI_ISL_3881818 | 2021-09-02      |
| hCoV-19/Japan/PG-74791/2021 | EPI_ISL_3881822 | 2021-09-02      |
| hCoV-19/Japan/PG-74792/2021 | EPI_ISL_3881826 | 2021-09-02      |
| hCoV-19/Japan/PG-74793/2021 | EPI_ISL_3881829 | 2021-09-02      |
| hCoV-19/Japan/PG-74794/2021 | EPI_ISL_3881831 | 2021-09-02      |
| hCoV-19/Japan/PG-74795/2021 | EPI_ISL_3881834 | 2021-09-02      |
| hCoV-19/Japan/PG-74796/2021 | EPI_ISL_3881836 | 2021-09-02      |
| hCoV-19/Japan/PG-74797/2021 | EPI_ISL_3881842 | 2021-09-02      |
| hCoV-19/Japan/PG-74798/2021 | EPI_ISL_3881845 | 2021-09-02      |
| hCoV-19/Japan/PG-74799/2021 | EPI_ISL_3881847 | 2021-09-02      |
| hCoV-19/Japan/PG-74800/2021 | EPI_ISL_3881850 | 2021-09-02      |
| hCoV-19/Japan/PG-74801/2021 | EPI_ISL_3881852 | 2021-09-02      |
| hCoV-19/Japan/PG-74802/2021 | EPI_ISL_3881853 | 2021-09-02      |
| hCoV-19/Japan/PG-74803/2021 | EPI_ISL_3881856 | 2021-09-02      |
| hCoV-19/Japan/PG-74804/2021 | EPI_ISL_3881858 | 2021-09-02      |
| hCoV-19/Japan/PG-74805/2021 | EPI_ISL_3881861 | 2021-09-02      |
| hCoV-19/Japan/PG-74806/2021 | EPI_ISL_3881864 | 2021-09-02      |
| hCoV-19/Japan/PG-74807/2021 | EPI_ISL_3881866 | 2021-09-02      |
| hCoV-19/Japan/PG-74808/2021 | EPI_ISL_3881868 | 2021-09-02      |
| hCoV-19/Japan/PG-74809/2021 | EPI_ISL_3881873 | 2021-09-02      |
| hCoV-19/Japan/PG-74810/2021 | EPI_ISL_3881876 | 2021-09-02      |
| hCoV-19/Japan/PG-74811/2021 | EPI_ISL_3881879 | 2021-09-02      |
| hCoV-19/Japan/PG-74812/2021 | EPI_ISL_3881880 | 2021-09-02      |
| hCoV-19/Japan/PG-74813/2021 | EPI_ISL_3881881 | 2021-09-02      |
| hCoV-19/Japan/PG-74814/2021 | EPI_ISL_3881882 | 2021-09-02      |
| hCoV-19/Japan/PG-74815/2021 | EPI_ISL_3881884 | 2021-09-02      |
| hCoV-19/Japan/PG-74816/2021 | EPI_ISL_3881886 | 2021-09-02      |
| hCoV-19/Japan/PG-74817/2021 | EPI_ISL_3881889 | 2021-09-02      |
| hCoV-19/Japan/PG-74818/2021 | EPI_ISL_3881891 | 2021-09-02      |
| hCoV-19/Japan/PG-74819/2021 | EPI_ISL_3881893 | 2021-09-02      |
| hCoV-19/Japan/PG-74820/2021 | EPI_ISL_3881895 | 2021-09-02      |
| hCoV-19/Japan/PG-74821/2021 | EPI_ISL_3881897 | 2021-09-02      |
| hCoV-19/Japan/PG-74822/2021 | EPI_ISL_3881899 | 2021-09-02      |
| hCoV-19/Japan/PG-74823/2021 | EPI_ISL_3881901 | 2021-09-02      |
| hCoV-19/Japan/PG-74824/2021 | EPI_ISL_3881903 | 2021-09-02      |
| hCoV-19/Japan/PG-74825/2021 | EPI_ISL_3881905 | 2021-09-02      |
| hCoV-19/Japan/PG-74826/2021 | EPI_ISL_3881907 | 2021-09-02      |
| hCoV-19/Japan/PG-74827/2021 | EPI_ISL_3881908 | 2021-09-02      |
| hCoV-19/Japan/PG-74828/2021 | EPI_ISL_3881909 | 2021-09-02      |
| hCoV-19/Japan/PG-74829/2021 | EPI_ISL_3881912 | 2021-09-02      |
| hCoV-19/Japan/PG-74830/2021 | EPI_ISL_3881913 | 2021-09-02      |
| hCoV-19/Japan/PG-74831/2021 | EPI_ISL_3881915 | 2021-09-02      |
| hCoV-19/Japan/PG-74832/2021 | EPI_ISL_3881917 | 2021-09-02      |
| hCoV-19/Japan/PG-74833/2021 | EPI_ISL_3881919 | 2021-09-02      |
| hCoV-19/Japan/PG-74834/2021 | EPI_ISL_3881922 | 2021-09-02      |
| hCoV-19/Japan/PG-74835/2021 | EPI_ISL_3881923 | 2021-09-02      |
| hCoV-19/Japan/PG-74836/2021 | EPI_ISL_3881925 | 2021-09-02      |
| hCoV-19/Japan/PG-74837/2021 | EPI_ISL_3881926 | 2021-09-02      |
| hCoV-19/Japan/PG-74838/2021 | EPI_ISL_3881928 | 2021-09-02      |
| hCoV-19/Japan/PG-74839/2021 | EPI_ISL_3881930 | 2021-09-02      |
| hCoV-19/Japan/PG-74840/2021 | EPI_ISL_3881931 | 2021-09-02      |
| hCoV-19/Japan/PG-74841/2021 | EPI_ISL_3881933 | 2021-09-02      |

| virus_name                  | epiID           | submission_date |
|-----------------------------|-----------------|-----------------|
| hCoV-19/Japan/PG-74842/2021 | EPI_ISL_3881935 | 2021-09-02      |
| hCoV-19/Japan/PG-74843/2021 | EPI_ISL_3881937 | 2021-09-02      |
| hCoV-19/Japan/PG-74844/2021 | EPI_ISL_3881939 | 2021-09-02      |
| hCoV-19/Japan/PG-74845/2021 | EPI_ISL_3881941 | 2021-09-02      |
| hCoV-19/Japan/PG-74846/2021 | EPI_ISL_3881943 | 2021-09-02      |
| hCoV-19/Japan/PG-74847/2021 | EPI_ISL_3881945 | 2021-09-02      |
| hCoV-19/Japan/PG-74848/2021 | EPI_ISL_3881948 | 2021-09-02      |
| hCoV-19/Japan/PG-74849/2021 | EPI_ISL_3881949 | 2021-09-02      |
| hCoV-19/Japan/PG-74850/2021 | EPI_ISL_3881950 | 2021-09-02      |
| hCoV-19/Japan/PG-74851/2021 | EPI_ISL_3881952 | 2021-09-02      |
| hCoV-19/Japan/PG-74852/2021 | EPI_ISL_3881953 | 2021-09-02      |
| hCoV-19/Japan/PG-74853/2021 | EPI_ISL_3881955 | 2021-09-02      |
| hCoV-19/Japan/PG-74854/2021 | EPI_ISL_3881956 | 2021-09-02      |
| hCoV-19/Japan/PG-74855/2021 | EPI_ISL_3881958 | 2021-09-02      |
| hCoV-19/Japan/PG-74856/2021 | EPI_ISL_3881959 | 2021-09-02      |
| hCoV-19/Japan/PG-74857/2021 | EPI_ISL_3881961 | 2021-09-02      |
| hCoV-19/Japan/PG-74858/2021 | EPI_ISL_3881963 | 2021-09-02      |
| hCoV-19/Japan/PG-74859/2021 | EPI_ISL_3881965 | 2021-09-02      |
| hCoV-19/Japan/PG-74860/2021 | EPI_ISL_3881966 | 2021-09-02      |
| hCoV-19/Japan/PG-74861/2021 | EPI_ISL_3881968 | 2021-09-02      |
| hCoV-19/Japan/PG-74862/2021 | EPI_ISL_3881970 | 2021-09-02      |
| hCoV-19/Japan/PG-74863/2021 | EPI_ISL_3881972 | 2021-09-02      |
| hCoV-19/Japan/PG-74864/2021 | EPI_ISL_3881974 | 2021-09-02      |
| hCoV-19/Japan/PG-74865/2021 | EPI_ISL_3881977 | 2021-09-02      |
| hCoV-19/Japan/PG-74866/2021 | EPI_ISL_3881979 | 2021-09-02      |
| hCoV-19/Japan/PG-74867/2021 | EPI_ISL_3881981 | 2021-09-02      |
| hCoV-19/Japan/PG-74868/2021 | EPI_ISL_3881982 | 2021-09-02      |
| hCoV-19/Japan/PG-74869/2021 | EPI_ISL_3881984 | 2021-09-02      |
| hCoV-19/Japan/PG-74870/2021 | EPI_ISL_3881986 | 2021-09-02      |
| hCoV-19/Japan/PG-74871/2021 | EPI_ISL_3881988 | 2021-09-02      |
| hCoV-19/Japan/PG-74872/2021 | EPI_ISL_3881989 | 2021-09-02      |
| hCoV-19/Japan/PG-74873/2021 | EPI_ISL_3881991 | 2021-09-02      |
| hCoV-19/Japan/PG-74874/2021 | EPI_ISL_3881995 | 2021-09-02      |
| hCoV-19/Japan/PG-74875/2021 | EPI_ISL_3882003 | 2021-09-02      |
| hCoV-19/Japan/PG-74876/2021 | EPI_ISL_3882012 | 2021-09-02      |
| hCoV-19/Japan/PG-74877/2021 | EPI_ISL_3882019 | 2021-09-02      |
| hCoV-19/Japan/PG-74878/2021 | EPI_ISL_3882025 | 2021-09-02      |
| hCoV-19/Japan/PG-74879/2021 | EPI_ISL_3882032 | 2021-09-02      |
| hCoV-19/Japan/PG-74880/2021 | EPI_ISL_3882039 | 2021-09-02      |
| hCoV-19/Japan/PG-74881/2021 | EPI_ISL_3882046 | 2021-09-02      |
| hCoV-19/Japan/PG-74882/2021 | EPI_ISL_3882053 | 2021-09-02      |
| hCoV-19/Japan/PG-74883/2021 | EPI_ISL_3882060 | 2021-09-02      |
| hCoV-19/Japan/PG-74884/2021 | EPI_ISL_3882068 | 2021-09-02      |
| hCoV-19/Japan/PG-74885/2021 | EPI_ISL_3882074 | 2021-09-02      |
| hCoV-19/Japan/PG-74886/2021 | EPI_ISL_3882081 | 2021-09-02      |
| hCoV-19/Japan/PG-74887/2021 | EPI_ISL_3882088 | 2021-09-02      |
| hCoV-19/Japan/PG-74888/2021 | EPI_ISL_3882097 | 2021-09-02      |
| hCoV-19/Japan/PG-74889/2021 | EPI_ISL_3882103 | 2021-09-02      |
| hCoV-19/Japan/PG-74890/2021 | EPI_ISL_3882110 | 2021-09-02      |
| hCoV-19/Japan/PG-74891/2021 | EPI_ISL_3882117 | 2021-09-02      |
| hCoV-19/Japan/PG-74892/2021 | EPI_ISL_3882125 | 2021-09-02      |
| hCoV-19/Japan/PG-74893/2021 | EPI_ISL_3882132 | 2021-09-02      |
| hCoV-19/Japan/PG-74894/2021 | EPI_ISL_3882139 | 2021-09-02      |
| hCoV-19/Japan/PG-74895/2021 | EPI_ISL_3882147 | 2021-09-02      |

| virus_name                  | epiID           | submission_date |
|-----------------------------|-----------------|-----------------|
| hCoV-19/Japan/PG-74896/2021 | EPI_ISL_3882154 | 2021-09-02      |
| hCoV-19/Japan/PG-74897/2021 | EPI_ISL_3882160 | 2021-09-02      |
| hCoV-19/Japan/PG-74898/2021 | EPI_ISL_3882168 | 2021-09-02      |
| hCoV-19/Japan/PG-74899/2021 | EPI_ISL_3882175 | 2021-09-02      |
| hCoV-19/Japan/PG-74900/2021 | EPI_ISL_3882183 | 2021-09-02      |
| hCoV-19/Japan/PG-74901/2021 | EPI_ISL_3882191 | 2021-09-02      |
| hCoV-19/Japan/PG-74902/2021 | EPI_ISL_3882199 | 2021-09-02      |
| hCoV-19/Japan/PG-74903/2021 | EPI_ISL_3882206 | 2021-09-02      |
| hCoV-19/Japan/PG-74904/2021 | EPI_ISL_3882213 | 2021-09-02      |
| hCoV-19/Japan/PG-74905/2021 | EPI_ISL_3882222 | 2021-09-02      |
| hCoV-19/Japan/PG-74906/2021 | EPI_ISL_3882229 | 2021-09-02      |
| hCoV-19/Japan/PG-74907/2021 | EPI_ISL_3882238 | 2021-09-02      |
| hCoV-19/Japan/PG-74908/2021 | EPI_ISL_3882241 | 2021-09-02      |
| hCoV-19/Japan/PG-74909/2021 | EPI_ISL_3882249 | 2021-09-02      |
| hCoV-19/Japan/PG-74910/2021 | EPI_ISL_3882257 | 2021-09-02      |
| hCoV-19/Japan/PG-74911/2021 | EPI_ISL_3882264 | 2021-09-02      |
| hCoV-19/Japan/PG-74912/2021 | EPI_ISL_3882270 | 2021-09-02      |
| hCoV-19/Japan/PG-74913/2021 | EPI_ISL_3882278 | 2021-09-02      |
| hCoV-19/Japan/PG-74914/2021 | EPI_ISL_3882285 | 2021-09-02      |
| hCoV-19/Japan/PG-74915/2021 | EPI_ISL_3882290 | 2021-09-02      |
| hCoV-19/Japan/PG-74916/2021 | EPI_ISL_3882298 | 2021-09-02      |
| hCoV-19/Japan/PG-74917/2021 | EPI_ISL_3882304 | 2021-09-02      |
| hCoV-19/Japan/PG-74918/2021 | EPI_ISL_3882313 | 2021-09-02      |
| hCoV-19/Japan/PG-74919/2021 | EPI_ISL_3882320 | 2021-09-02      |
| hCoV-19/Japan/PG-74920/2021 | EPI_ISL_3882327 | 2021-09-02      |
| hCoV-19/Japan/PG-74921/2021 | EPI_ISL_3882336 | 2021-09-02      |
| hCoV-19/Japan/PG-74922/2021 | EPI_ISL_3882342 | 2021-09-02      |
| hCoV-19/Japan/PG-74923/2021 | EPI_ISL_3882351 | 2021-09-02      |
| hCoV-19/Japan/PG-74924/2021 | EPI_ISL_3882358 | 2021-09-02      |
| hCoV-19/Japan/PG-74925/2021 | EPI_ISL_3882365 | 2021-09-02      |
| hCoV-19/Japan/PG-74926/2021 | EPI_ISL_3882373 | 2021-09-02      |
| hCoV-19/Japan/PG-74927/2021 | EPI_ISL_3882379 | 2021-09-02      |
| hCoV-19/Japan/PG-74928/2021 | EPI_ISL_3882386 | 2021-09-02      |
| hCoV-19/Japan/PG-74929/2021 | EPI_ISL_3882394 | 2021-09-02      |
| hCoV-19/Japan/PG-74930/2021 | EPI_ISL_3882400 | 2021-09-02      |
| hCoV-19/Japan/PG-74931/2021 | EPI_ISL_3882407 | 2021-09-02      |
| hCoV-19/Japan/PG-74932/2021 | EPI_ISL_3882415 | 2021-09-02      |
| hCoV-19/Japan/PG-74933/2021 | EPI_ISL_3882422 | 2021-09-02      |
| hCoV-19/Japan/PG-74934/2021 | EPI_ISL_3882426 | 2021-09-02      |
| hCoV-19/Japan/PG-74935/2021 | EPI_ISL_3882433 | 2021-09-02      |
| hCoV-19/Japan/PG-74936/2021 | EPI_ISL_3882440 | 2021-09-02      |
| hCoV-19/Japan/PG-74937/2021 | EPI_ISL_3882447 | 2021-09-02      |
| hCoV-19/Japan/PG-74938/2021 | EPI_ISL_3882454 | 2021-09-02      |
| hCoV-19/Japan/PG-74939/2021 | EPI_ISL_3882462 | 2021-09-02      |
| hCoV-19/Japan/PG-74940/2021 | EPI_ISL_3882469 | 2021-09-02      |
| hCoV-19/Japan/PG-74941/2021 | EPI_ISL_3882477 | 2021-09-02      |
| hCoV-19/Japan/PG-74942/2021 | EPI_ISL_3882486 | 2021-09-02      |
| hCoV-19/Japan/PG-74943/2021 | EPI_ISL_3882492 | 2021-09-02      |
| hCoV-19/Japan/PG-74944/2021 | EPI_ISL_3882500 | 2021-09-02      |
| hCoV-19/Japan/PG-74945/2021 | EPI_ISL_3882508 | 2021-09-02      |
| hCoV-19/Japan/PG-74946/2021 | EPI_ISL_3882514 | 2021-09-02      |
| hCoV-19/Japan/PG-74947/2021 | EPI_ISL_3882521 | 2021-09-02      |
| hCoV-19/Japan/PG-74948/2021 | EPI_ISL_3882527 | 2021-09-02      |
| hCoV-19/Japan/PG-74949/2021 | EPI_ISL_3882535 | 2021-09-02      |

| virus_name                  | epiID           | submission_date |
|-----------------------------|-----------------|-----------------|
| hCoV-19/Japan/PG-74950/2021 | EPI_ISL_3882543 | 2021-09-02      |
| hCoV-19/Japan/PG-74951/2021 | EPI_ISL_3882550 | 2021-09-02      |
| hCoV-19/Japan/PG-74952/2021 | EPI_ISL_3882557 | 2021-09-02      |
| hCoV-19/Japan/PG-74953/2021 | EPI_ISL_3882565 | 2021-09-02      |
| hCoV-19/Japan/PG-74954/2021 | EPI_ISL_3882573 | 2021-09-02      |
| hCoV-19/Japan/PG-74955/2021 | EPI_ISL_3882581 | 2021-09-02      |
| hCoV-19/Japan/PG-74956/2021 | EPI_ISL_3882588 | 2021-09-02      |
| hCoV-19/Japan/PG-74957/2021 | EPI_ISL_3882595 | 2021-09-02      |
| hCoV-19/Japan/PG-74958/2021 | EPI_ISL_3882601 | 2021-09-02      |
| hCoV-19/Japan/PG-74959/2021 | EPI_ISL_3882609 | 2021-09-02      |
| hCoV-19/Japan/PG-74960/2021 | EPI_ISL_3882617 | 2021-09-02      |
| hCoV-19/Japan/PG-74961/2021 | EPI_ISL_3882624 | 2021-09-02      |
| hCoV-19/Japan/PG-74962/2021 | EPI_ISL_3882633 | 2021-09-02      |
| hCoV-19/Japan/PG-74963/2021 | EPI_ISL_3882637 | 2021-09-02      |
| hCoV-19/Japan/PG-74964/2021 | EPI_ISL_3882638 | 2021-09-02      |
| hCoV-19/Japan/PG-74965/2021 | EPI_ISL_3882640 | 2021-09-02      |
| hCoV-19/Japan/PG-74966/2021 | EPI_ISL_3882642 | 2021-09-02      |
| hCoV-19/Japan/PG-74967/2021 | EPI_ISL_3882643 | 2021-09-02      |
| hCoV-19/Japan/PG-74968/2021 | EPI_ISL_3882645 | 2021-09-02      |
| hCoV-19/Japan/PG-74969/2021 | EPI_ISL_3882646 | 2021-09-02      |
| hCoV-19/Japan/PG-74970/2021 | EPI_ISL_3882648 | 2021-09-02      |
| hCoV-19/Japan/PG-74971/2021 | EPI_ISL_3882649 | 2021-09-02      |
| hCoV-19/Japan/PG-74972/2021 | EPI_ISL_3882651 | 2021-09-02      |
| hCoV-19/Japan/PG-74973/2021 | EPI_ISL_3882652 | 2021-09-02      |
| hCoV-19/Japan/PG-74974/2021 | EPI_ISL_3882654 | 2021-09-02      |
| hCoV-19/Japan/PG-74975/2021 | EPI_ISL_3882656 | 2021-09-02      |
| hCoV-19/Japan/PG-74976/2021 | EPI_ISL_3882658 | 2021-09-02      |
| hCoV-19/Japan/PG-74977/2021 | EPI_ISL_3882659 | 2021-09-02      |
| hCoV-19/Japan/PG-74978/2021 | EPI_ISL_3882661 | 2021-09-02      |
| hCoV-19/Japan/PG-74979/2021 | EPI_ISL_3882663 | 2021-09-02      |
| hCoV-19/Japan/PG-74980/2021 | EPI_ISL_3882664 | 2021-09-02      |
| hCoV-19/Japan/PG-74981/2021 | EPI_ISL_3882665 | 2021-09-02      |
| hCoV-19/Japan/PG-74982/2021 | EPI_ISL_3882666 | 2021-09-02      |
| hCoV-19/Japan/PG-74983/2021 | EPI_ISL_3882670 | 2021-09-02      |
| hCoV-19/Japan/PG-74984/2021 | EPI_ISL_3882676 | 2021-09-02      |
| hCoV-19/Japan/PG-74985/2021 | EPI_ISL_3882684 | 2021-09-02      |
| hCoV-19/Japan/PG-74986/2021 | EPI_ISL_3882690 | 2021-09-02      |
| hCoV-19/Japan/PG-74987/2021 | EPI_ISL_3882697 | 2021-09-02      |
| hCoV-19/Japan/PG-74988/2021 | EPI_ISL_3882704 | 2021-09-02      |
| hCoV-19/Japan/PG-74989/2021 | EPI_ISL_3882711 | 2021-09-02      |
| hCoV-19/Japan/PG-74990/2021 | EPI_ISL_3882719 | 2021-09-02      |
| hCoV-19/Japan/PG-74991/2021 | EPI_ISL_3882727 | 2021-09-02      |
| hCoV-19/Japan/PG-74992/2021 | EPI_ISL_3882734 | 2021-09-02      |
| hCoV-19/Japan/PG-74993/2021 | EPI_ISL_3882743 | 2021-09-02      |
| hCoV-19/Japan/PG-74994/2021 | EPI_ISL_3882750 | 2021-09-02      |
| hCoV-19/Japan/PG-74995/2021 | EPI_ISL_3882757 | 2021-09-02      |
| hCoV-19/Japan/PG-74996/2021 | EPI_ISL_3882764 | 2021-09-02      |
| hCoV-19/Japan/PG-74997/2021 | EPI_ISL_3882772 | 2021-09-02      |
| hCoV-19/Japan/PG-74998/2021 | EPI_ISL_3882780 | 2021-09-02      |
| hCoV-19/Japan/PG-74999/2021 | EPI_ISL_3882787 | 2021-09-02      |
| hCoV-19/Japan/PG-75000/2021 | EPI_ISL_3882795 | 2021-09-02      |
| hCoV-19/Japan/PG-75001/2021 | EPI_ISL_3882802 | 2021-09-02      |
| hCoV-19/Japan/PG-75002/2021 | EPI_ISL_3882809 | 2021-09-02      |
| hCoV-19/Japan/PG-75003/2021 | EPI_ISL_3882818 | 2021-09-02      |



| virus_name                  | epiID           | submission_date |
|-----------------------------|-----------------|-----------------|
| hCoV-19/Japan/PG-75004/2021 | EPI_ISL_3882825 | 2021-09-02      |
| hCoV-19/Japan/PG-75005/2021 | EPI_ISL_3882833 | 2021-09-02      |
| hCoV-19/Japan/PG-75006/2021 | EPI_ISL_3882842 | 2021-09-02      |
| hCoV-19/Japan/PG-75007/2021 | EPI_ISL_3882850 | 2021-09-02      |
| hCoV-19/Japan/PG-75008/2021 | EPI_ISL_3882858 | 2021-09-02      |
| hCoV-19/Japan/PG-75009/2021 | EPI_ISL_3882866 | 2021-09-02      |
| hCoV-19/Japan/PG-75010/2021 | EPI_ISL_3882874 | 2021-09-02      |
| hCoV-19/Japan/PG-75011/2021 | EPI_ISL_3882883 | 2021-09-02      |
| hCoV-19/Japan/PG-75012/2021 | EPI_ISL_3882891 | 2021-09-02      |
| hCoV-19/Japan/PG-75013/2021 | EPI_ISL_3882899 | 2021-09-02      |
| hCoV-19/Japan/PG-75014/2021 | EPI_ISL_3882907 | 2021-09-02      |
| hCoV-19/Japan/PG-75015/2021 | EPI_ISL_3882915 | 2021-09-02      |
| hCoV-19/Japan/PG-75016/2021 | EPI_ISL_3882922 | 2021-09-02      |
| hCoV-19/Japan/PG-75017/2021 | EPI_ISL_3882928 | 2021-09-02      |
| hCoV-19/Japan/PG-75018/2021 | EPI_ISL_3882936 | 2021-09-02      |
| hCoV-19/Japan/PG-75019/2021 | EPI_ISL_3882944 | 2021-09-02      |
| hCoV-19/Japan/PG-75020/2021 | EPI_ISL_3882951 | 2021-09-02      |
| hCoV-19/Japan/PG-75021/2021 | EPI_ISL_3882956 | 2021-09-02      |
| hCoV-19/Japan/PG-75022/2021 | EPI_ISL_3882962 | 2021-09-02      |
| hCoV-19/Japan/PG-75023/2021 | EPI_ISL_3882970 | 2021-09-02      |
| hCoV-19/Japan/PG-75024/2021 | EPI_ISL_3882978 | 2021-09-02      |
| hCoV-19/Japan/PG-75025/2021 | EPI_ISL_3882985 | 2021-09-02      |
| hCoV-19/Japan/PG-75026/2021 | EPI_ISL_3882993 | 2021-09-02      |
| hCoV-19/Japan/PG-75027/2021 | EPI_ISL_3883001 | 2021-09-02      |
| hCoV-19/Japan/PG-75028/2021 | EPI_ISL_3883010 | 2021-09-02      |
| hCoV-19/Japan/PG-75029/2021 | EPI_ISL_3883017 | 2021-09-02      |
| hCoV-19/Japan/PG-75030/2021 | EPI_ISL_3883025 | 2021-09-02      |
| hCoV-19/Japan/PG-75031/2021 | EPI_ISL_3883032 | 2021-09-02      |
| hCoV-19/Japan/PG-75032/2021 | EPI_ISL_3883040 | 2021-09-02      |
| hCoV-19/Japan/PG-75033/2021 | EPI_ISL_3883048 | 2021-09-02      |
| hCoV-19/Japan/PG-75034/2021 | EPI_ISL_3883057 | 2021-09-02      |
| hCoV-19/Japan/PG-75035/2021 | EPI_ISL_3883066 | 2021-09-02      |
| hCoV-19/Japan/PG-75036/2021 | EPI_ISL_3883074 | 2021-09-02      |
| hCoV-19/Japan/PG-75037/2021 | EPI_ISL_3883083 | 2021-09-02      |
| hCoV-19/Japan/PG-75038/2021 | EPI_ISL_3883091 | 2021-09-02      |
| hCoV-19/Japan/PG-75039/2021 | EPI_ISL_3883099 | 2021-09-02      |
| hCoV-19/Japan/PG-75040/2021 | EPI_ISL_3883108 | 2021-09-02      |
| hCoV-19/Japan/PG-75041/2021 | EPI_ISL_3883114 | 2021-09-02      |
| hCoV-19/Japan/PG-75042/2021 | EPI_ISL_3883121 | 2021-09-02      |
| hCoV-19/Japan/PG-75043/2021 | EPI_ISL_3883129 | 2021-09-02      |
| hCoV-19/Japan/PG-75044/2021 | EPI_ISL_3883136 | 2021-09-02      |
| hCoV-19/Japan/PG-75045/2021 | EPI_ISL_3883144 | 2021-09-02      |
| hCoV-19/Japan/PG-75046/2021 | EPI_ISL_3883152 | 2021-09-02      |
| hCoV-19/Japan/PG-75047/2021 | EPI_ISL_3883160 | 2021-09-02      |
| hCoV-19/Japan/PG-75048/2021 | EPI_ISL_3883167 | 2021-09-02      |
| hCoV-19/Japan/PG-75049/2021 | EPI_ISL_3883174 | 2021-09-02      |
| hCoV-19/Japan/PG-75050/2021 | EPI_ISL_3883181 | 2021-09-02      |
| hCoV-19/Japan/PG-75051/2021 | EPI_ISL_3883189 | 2021-09-02      |
| hCoV-19/Japan/PG-75052/2021 | EPI_ISL_3883196 | 2021-09-02      |
| hCoV-19/Japan/PG-75053/2021 | EPI_ISL_3883203 | 2021-09-02      |
| hCoV-19/Japan/PG-75054/2021 | EPI_ISL_3883210 | 2021-09-02      |
| hCoV-19/Japan/PG-75055/2021 | EPI_ISL_3883218 | 2021-09-02      |
| hCoV-19/Japan/PG-75056/2021 | EPI_ISL_3883226 | 2021-09-02      |
| hCoV-19/Japan/PG-75057/2021 | EPI_ISL_3883233 | 2021-09-02      |

| virus_name                  | epiID           | submission_date |
|-----------------------------|-----------------|-----------------|
| hCoV-19/Japan/PG-75058/2021 | EPI_ISL_3883240 | 2021-09-02      |
| hCoV-19/Japan/PG-75059/2021 | EPI_ISL_3883245 | 2021-09-02      |
| hCoV-19/Japan/PG-75060/2021 | EPI_ISL_3883253 | 2021-09-02      |
| hCoV-19/Japan/PG-75061/2021 | EPI_ISL_3883261 | 2021-09-02      |
| hCoV-19/Japan/PG-75062/2021 | EPI_ISL_3883269 | 2021-09-02      |
| hCoV-19/Japan/PG-75063/2021 | EPI_ISL_3883276 | 2021-09-02      |
| hCoV-19/Japan/PG-75064/2021 | EPI_ISL_3883284 | 2021-09-02      |
| hCoV-19/Japan/PG-75065/2021 | EPI_ISL_3883292 | 2021-09-02      |
| hCoV-19/Japan/PG-75066/2021 | EPI_ISL_3883300 | 2021-09-02      |
| hCoV-19/Japan/PG-75067/2021 | EPI_ISL_3883308 | 2021-09-02      |
| hCoV-19/Japan/PG-75068/2021 | EPI_ISL_3883315 | 2021-09-02      |
| hCoV-19/Japan/PG-75069/2021 | EPI_ISL_3883321 | 2021-09-02      |
| hCoV-19/Japan/PG-75070/2021 | EPI_ISL_3883323 | 2021-09-02      |
| hCoV-19/Japan/PG-75071/2021 | EPI_ISL_3883325 | 2021-09-02      |
| hCoV-19/Japan/PG-75072/2021 | EPI_ISL_3883326 | 2021-09-02      |
| hCoV-19/Japan/PG-75073/2021 | EPI_ISL_3883328 | 2021-09-02      |
| hCoV-19/Japan/PG-75074/2021 | EPI_ISL_3883330 | 2021-09-02      |
| hCoV-19/Japan/PG-75075/2021 | EPI_ISL_3883332 | 2021-09-02      |
| hCoV-19/Japan/PG-75076/2021 | EPI_ISL_3883333 | 2021-09-02      |
| hCoV-19/Japan/PG-75077/2021 | EPI_ISL_3883334 | 2021-09-02      |
| hCoV-19/Japan/PG-75078/2021 | EPI_ISL_3883336 | 2021-09-02      |
| hCoV-19/Japan/PG-75079/2021 | EPI_ISL_3883337 | 2021-09-02      |
| hCoV-19/Japan/PG-75080/2021 | EPI_ISL_3883339 | 2021-09-02      |
| hCoV-19/Japan/PG-75081/2021 | EPI_ISL_3883340 | 2021-09-02      |
| hCoV-19/Japan/PG-75082/2021 | EPI_ISL_3883342 | 2021-09-02      |
| hCoV-19/Japan/PG-75083/2021 | EPI_ISL_3883344 | 2021-09-02      |
| hCoV-19/Japan/PG-75084/2021 | EPI_ISL_3883346 | 2021-09-02      |
| hCoV-19/Japan/PG-75085/2021 | EPI_ISL_3883349 | 2021-09-02      |
| hCoV-19/Japan/PG-75086/2021 | EPI_ISL_3883350 | 2021-09-02      |
| hCoV-19/Japan/PG-75087/2021 | EPI_ISL_3883352 | 2021-09-02      |
| hCoV-19/Japan/PG-75088/2021 | EPI_ISL_3883354 | 2021-09-02      |
| hCoV-19/Japan/PG-75089/2021 | EPI_ISL_3883356 | 2021-09-02      |
| hCoV-19/Japan/PG-75090/2021 | EPI_ISL_3883363 | 2021-09-02      |
| hCoV-19/Japan/PG-75091/2021 | EPI_ISL_3883369 | 2021-09-02      |
| hCoV-19/Japan/PG-75092/2021 | EPI_ISL_3883378 | 2021-09-02      |
| hCoV-19/Japan/PG-75093/2021 | EPI_ISL_3883386 | 2021-09-02      |
| hCoV-19/Japan/PG-75094/2021 | EPI_ISL_3883392 | 2021-09-02      |
| hCoV-19/Japan/PG-75095/2021 | EPI_ISL_3883398 | 2021-09-02      |
| hCoV-19/Japan/PG-75096/2021 | EPI_ISL_3883407 | 2021-09-02      |
| hCoV-19/Japan/PG-75097/2021 | EPI_ISL_3883415 | 2021-09-02      |
| hCoV-19/Japan/PG-75098/2021 | EPI_ISL_3883422 | 2021-09-02      |
| hCoV-19/Japan/PG-75099/2021 | EPI_ISL_3883429 | 2021-09-02      |
| hCoV-19/Japan/PG-75100/2021 | EPI_ISL_3883437 | 2021-09-02      |
| hCoV-19/Japan/PG-75101/2021 | EPI_ISL_3883444 | 2021-09-02      |
| hCoV-19/Japan/PG-75102/2021 | EPI_ISL_3883451 | 2021-09-02      |
| hCoV-19/Japan/PG-75103/2021 | EPI_ISL_3883458 | 2021-09-02      |
| hCoV-19/Japan/PG-75104/2021 | EPI_ISL_3883466 | 2021-09-02      |
| hCoV-19/Japan/PG-75105/2021 | EPI_ISL_3883473 | 2021-09-02      |
| hCoV-19/Japan/PG-75106/2021 | EPI_ISL_3883481 | 2021-09-02      |
| hCoV-19/Japan/PG-75107/2021 | EPI_ISL_3883489 | 2021-09-02      |
| hCoV-19/Japan/PG-75108/2021 | EPI_ISL_3883496 | 2021-09-02      |
| hCoV-19/Japan/PG-75109/2021 | EPI_ISL_3883504 | 2021-09-02      |
| hCoV-19/Japan/PG-75110/2021 | EPI_ISL_3883511 | 2021-09-02      |
| hCoV-19/Japan/PG-75111/2021 | EPI_ISL_3883518 | 2021-09-02      |

| virus_name                  | epiID           | submission_date |
|-----------------------------|-----------------|-----------------|
| hCoV-19/Japan/PG-75112/2021 | EPI_ISL_3883527 | 2021-09-02      |
| hCoV-19/Japan/PG-75113/2021 | EPI_ISL_3883534 | 2021-09-02      |
| hCoV-19/Japan/PG-75114/2021 | EPI_ISL_3883542 | 2021-09-02      |
| hCoV-19/Japan/PG-75115/2021 | EPI_ISL_3883549 | 2021-09-02      |
| hCoV-19/Japan/PG-75116/2021 | EPI_ISL_3883556 | 2021-09-02      |
| hCoV-19/Japan/PG-75117/2021 | EPI_ISL_3883565 | 2021-09-02      |
| hCoV-19/Japan/PG-75118/2021 | EPI_ISL_3883573 | 2021-09-02      |
| hCoV-19/Japan/PG-75119/2021 | EPI_ISL_3883577 | 2021-09-02      |
| hCoV-19/Japan/PG-75120/2021 | EPI_ISL_3883586 | 2021-09-02      |
| hCoV-19/Japan/PG-75121/2021 | EPI_ISL_3883593 | 2021-09-02      |
| hCoV-19/Japan/PG-75122/2021 | EPI_ISL_3883599 | 2021-09-02      |
| hCoV-19/Japan/PG-75123/2021 | EPI_ISL_3883607 | 2021-09-02      |
| hCoV-19/Japan/PG-75124/2021 | EPI_ISL_3883614 | 2021-09-02      |
| hCoV-19/Japan/PG-75125/2021 | EPI_ISL_3883623 | 2021-09-02      |
| hCoV-19/Japan/PG-75126/2021 | EPI_ISL_3883632 | 2021-09-02      |
| hCoV-19/Japan/PG-75127/2021 | EPI_ISL_3883638 | 2021-09-02      |
| hCoV-19/Japan/PG-75128/2021 | EPI_ISL_3883646 | 2021-09-02      |
| hCoV-19/Japan/PG-75129/2021 | EPI_ISL_3883654 | 2021-09-02      |
| hCoV-19/Japan/PG-75130/2021 | EPI_ISL_3883660 | 2021-09-02      |
| hCoV-19/Japan/PG-75131/2021 | EPI_ISL_3883668 | 2021-09-02      |
| hCoV-19/Japan/PG-75132/2021 | EPI_ISL_3883674 | 2021-09-02      |
| hCoV-19/Japan/PG-75133/2021 | EPI_ISL_3883682 | 2021-09-02      |
| hCoV-19/Japan/PG-75134/2021 | EPI_ISL_3883690 | 2021-09-02      |
| hCoV-19/Japan/PG-75135/2021 | EPI_ISL_3883698 | 2021-09-02      |
| hCoV-19/Japan/PG-75136/2021 | EPI_ISL_3883706 | 2021-09-02      |
| hCoV-19/Japan/PG-75137/2021 | EPI_ISL_3883713 | 2021-09-02      |
| hCoV-19/Japan/PG-75138/2021 | EPI_ISL_3883721 | 2021-09-02      |
| hCoV-19/Japan/PG-75139/2021 | EPI_ISL_3883729 | 2021-09-02      |
| hCoV-19/Japan/PG-75140/2021 | EPI_ISL_3883738 | 2021-09-02      |
| hCoV-19/Japan/PG-75141/2021 | EPI_ISL_3883745 | 2021-09-02      |
| hCoV-19/Japan/PG-75142/2021 | EPI_ISL_3883753 | 2021-09-02      |
| hCoV-19/Japan/PG-75143/2021 | EPI_ISL_3883760 | 2021-09-02      |
| hCoV-19/Japan/PG-75144/2021 | EPI_ISL_3883768 | 2021-09-02      |
| hCoV-19/Japan/PG-75145/2021 | EPI_ISL_3883776 | 2021-09-02      |
| hCoV-19/Japan/PG-75146/2021 | EPI_ISL_3883784 | 2021-09-02      |
| hCoV-19/Japan/PG-75147/2021 | EPI_ISL_3883794 | 2021-09-02      |
| hCoV-19/Japan/PG-75148/2021 | EPI_ISL_3883803 | 2021-09-02      |
| hCoV-19/Japan/PG-75149/2021 | EPI_ISL_3883810 | 2021-09-02      |
| hCoV-19/Japan/PG-75150/2021 | EPI_ISL_3883818 | 2021-09-02      |
| hCoV-19/Japan/PG-75151/2021 | EPI_ISL_3883825 | 2021-09-02      |
| hCoV-19/Japan/PG-75152/2021 | EPI_ISL_3883832 | 2021-09-02      |
| hCoV-19/Japan/PG-75153/2021 | EPI_ISL_3883840 | 2021-09-02      |
| hCoV-19/Japan/PG-75154/2021 | EPI_ISL_3883848 | 2021-09-02      |
| hCoV-19/Japan/PG-75155/2021 | EPI_ISL_3883856 | 2021-09-02      |
| hCoV-19/Japan/PG-75156/2021 | EPI_ISL_3883863 | 2021-09-02      |
| hCoV-19/Japan/PG-75157/2021 | EPI_ISL_3883870 | 2021-09-02      |
| hCoV-19/Japan/PG-75158/2021 | EPI_ISL_3883877 | 2021-09-02      |
| hCoV-19/Japan/PG-75159/2021 | EPI_ISL_3883884 | 2021-09-02      |
| hCoV-19/Japan/PG-75160/2021 | EPI_ISL_3883890 | 2021-09-02      |
| hCoV-19/Japan/PG-75161/2021 | EPI_ISL_3883897 | 2021-09-02      |
| hCoV-19/Japan/PG-75162/2021 | EPI_ISL_3883904 | 2021-09-02      |
| hCoV-19/Japan/PG-75163/2021 | EPI_ISL_3883911 | 2021-09-02      |
| hCoV-19/Japan/PG-75164/2021 | EPI_ISL_3883920 | 2021-09-02      |
| hCoV-19/Japan/PG-75165/2021 | EPI_ISL_3883927 | 2021-09-02      |

| virus_name                  | epiID           | submission_date |
|-----------------------------|-----------------|-----------------|
| hCoV-19/Japan/PG-75166/2021 | EPI_ISL_3883935 | 2021-09-02      |
| hCoV-19/Japan/PG-75167/2021 | EPI_ISL_3883944 | 2021-09-02      |
| hCoV-19/Japan/PG-75168/2021 | EPI_ISL_3883951 | 2021-09-02      |
| hCoV-19/Japan/PG-75169/2021 | EPI_ISL_3883961 | 2021-09-02      |
| hCoV-19/Japan/PG-75170/2021 | EPI_ISL_3883967 | 2021-09-02      |
| hCoV-19/Japan/PG-75171/2021 | EPI_ISL_3883975 | 2021-09-02      |
| hCoV-19/Japan/PG-75172/2021 | EPI_ISL_3883983 | 2021-09-02      |
| hCoV-19/Japan/PG-75173/2021 | EPI_ISL_3883988 | 2021-09-02      |
| hCoV-19/Japan/PG-75174/2021 | EPI_ISL_3883995 | 2021-09-02      |
| hCoV-19/Japan/PG-75175/2021 | EPI_ISL_3883997 | 2021-09-02      |
| hCoV-19/Japan/PG-75176/2021 | EPI_ISL_3884001 | 2021-09-02      |
| hCoV-19/Japan/PG-75177/2021 | EPI_ISL_3884008 | 2021-09-02      |
| hCoV-19/Japan/PG-75178/2021 | EPI_ISL_3884016 | 2021-09-02      |
| hCoV-19/Japan/PG-75179/2021 | EPI_ISL_3884023 | 2021-09-02      |
| hCoV-19/Japan/PG-75180/2021 | EPI_ISL_3884030 | 2021-09-02      |
| hCoV-19/Japan/PG-75181/2021 | EPI_ISL_3884035 | 2021-09-02      |
| hCoV-19/Japan/PG-75182/2021 | EPI_ISL_3884038 | 2021-09-02      |
| hCoV-19/Japan/PG-75183/2021 | EPI_ISL_3884040 | 2021-09-02      |
| hCoV-19/Japan/PG-75184/2021 | EPI_ISL_3884043 | 2021-09-02      |
| hCoV-19/Japan/PG-75185/2021 | EPI_ISL_3884045 | 2021-09-02      |
| hCoV-19/Japan/PG-75186/2021 | EPI_ISL_3884047 | 2021-09-02      |
| hCoV-19/Japan/PG-75187/2021 | EPI_ISL_3884049 | 2021-09-02      |
| hCoV-19/Japan/PG-75188/2021 | EPI_ISL_3884052 | 2021-09-02      |
| hCoV-19/Japan/PG-75189/2021 | EPI_ISL_3884054 | 2021-09-02      |
| hCoV-19/Japan/PG-75190/2021 | EPI_ISL_3884057 | 2021-09-02      |
| hCoV-19/Japan/PG-75191/2021 | EPI_ISL_3884059 | 2021-09-02      |
| hCoV-19/Japan/PG-75192/2021 | EPI_ISL_3884062 | 2021-09-02      |
| hCoV-19/Japan/PG-75193/2021 | EPI_ISL_3884064 | 2021-09-02      |
| hCoV-19/Japan/PG-75194/2021 | EPI_ISL_3884066 | 2021-09-02      |
| hCoV-19/Japan/PG-75195/2021 | EPI_ISL_3884068 | 2021-09-02      |
| hCoV-19/Japan/PG-75196/2021 | EPI_ISL_3884071 | 2021-09-02      |
| hCoV-19/Japan/PG-75197/2021 | EPI_ISL_3884072 | 2021-09-02      |
| hCoV-19/Japan/PG-75198/2021 | EPI_ISL_3884073 | 2021-09-02      |
| hCoV-19/Japan/PG-75199/2021 | EPI_ISL_3884075 | 2021-09-02      |
| hCoV-19/Japan/PG-75200/2021 | EPI_ISL_3884078 | 2021-09-02      |
| hCoV-19/Japan/PG-75201/2021 | EPI_ISL_3884084 | 2021-09-02      |
| hCoV-19/Japan/PG-75202/2021 | EPI_ISL_3884091 | 2021-09-02      |
| hCoV-19/Japan/PG-75203/2021 | EPI_ISL_3884098 | 2021-09-02      |
| hCoV-19/Japan/PG-75204/2021 | EPI_ISL_3884106 | 2021-09-02      |
| hCoV-19/Japan/PG-75205/2021 | EPI_ISL_3884114 | 2021-09-02      |
| hCoV-19/Japan/PG-75206/2021 | EPI_ISL_3884121 | 2021-09-02      |
| hCoV-19/Japan/PG-75207/2021 | EPI_ISL_3884130 | 2021-09-02      |
| hCoV-19/Japan/PG-75208/2021 | EPI_ISL_3884137 | 2021-09-02      |
| hCoV-19/Japan/PG-75209/2021 | EPI_ISL_3884143 | 2021-09-02      |
| hCoV-19/Japan/PG-75210/2021 | EPI_ISL_3884152 | 2021-09-02      |
| hCoV-19/Japan/PG-75211/2021 | EPI_ISL_3884160 | 2021-09-02      |
| hCoV-19/Japan/PG-75212/2021 | EPI_ISL_3884168 | 2021-09-02      |
| hCoV-19/Japan/PG-75213/2021 | EPI_ISL_3884176 | 2021-09-02      |
| hCoV-19/Japan/PG-75214/2021 | EPI_ISL_3884183 | 2021-09-02      |
| hCoV-19/Japan/PG-75215/2021 | EPI_ISL_3884191 | 2021-09-02      |
| hCoV-19/Japan/PG-75216/2021 | EPI_ISL_3884197 | 2021-09-02      |
| hCoV-19/Japan/PG-75217/2021 | EPI_ISL_3884206 | 2021-09-02      |
| hCoV-19/Japan/PG-75218/2021 | EPI_ISL_3884214 | 2021-09-02      |
| hCoV-19/Japan/PG-75219/2021 | EPI_ISL_3884221 | 2021-09-02      |

| virus_name                  | epiID           | submission_date |
|-----------------------------|-----------------|-----------------|
| hCoV-19/Japan/PG-75220/2021 | EPI_ISL_3884230 | 2021-09-02      |
| hCoV-19/Japan/PG-75221/2021 | EPI_ISL_3884237 | 2021-09-02      |
| hCoV-19/Japan/PG-75222/2021 | EPI_ISL_3884244 | 2021-09-02      |
| hCoV-19/Japan/PG-75223/2021 | EPI_ISL_3884252 | 2021-09-02      |
| hCoV-19/Japan/PG-75224/2021 | EPI_ISL_3884258 | 2021-09-02      |
| hCoV-19/Japan/PG-75225/2021 | EPI_ISL_3884266 | 2021-09-02      |
| hCoV-19/Japan/PG-75226/2021 | EPI_ISL_3884275 | 2021-09-02      |
| hCoV-19/Japan/PG-75227/2021 | EPI_ISL_3884282 | 2021-09-02      |
| hCoV-19/Japan/PG-75228/2021 | EPI_ISL_3884291 | 2021-09-02      |
| hCoV-19/Japan/PG-75229/2021 | EPI_ISL_3884299 | 2021-09-02      |
| hCoV-19/Japan/PG-75230/2021 | EPI_ISL_3884306 | 2021-09-02      |
| hCoV-19/Japan/PG-75231/2021 | EPI_ISL_3884312 | 2021-09-02      |
| hCoV-19/Japan/PG-75232/2021 | EPI_ISL_3884320 | 2021-09-02      |
| hCoV-19/Japan/PG-75233/2021 | EPI_ISL_3884328 | 2021-09-02      |
| hCoV-19/Japan/PG-75234/2021 | EPI_ISL_3884335 | 2021-09-02      |
| hCoV-19/Japan/PG-75235/2021 | EPI_ISL_3884343 | 2021-09-02      |
| hCoV-19/Japan/PG-75236/2021 | EPI_ISL_3884350 | 2021-09-02      |
| hCoV-19/Japan/PG-75237/2021 | EPI_ISL_3873659 | 2021-09-02      |
| hCoV-19/Japan/PG-75238/2021 | EPI_ISL_3873662 | 2021-09-02      |
| hCoV-19/Japan/PG-75239/2021 | EPI_ISL_3873664 | 2021-09-02      |
| hCoV-19/Japan/PG-75240/2021 | EPI_ISL_3873667 | 2021-09-02      |
| hCoV-19/Japan/PG-75241/2021 | EPI_ISL_3873669 | 2021-09-02      |
| hCoV-19/Japan/PG-75242/2021 | EPI_ISL_3873671 | 2021-09-02      |
| hCoV-19/Japan/PG-75243/2021 | EPI_ISL_3873672 | 2021-09-02      |
| hCoV-19/Japan/PG-75244/2021 | EPI_ISL_3873673 | 2021-09-02      |
| hCoV-19/Japan/PG-75245/2021 | EPI_ISL_3873674 | 2021-09-02      |
| hCoV-19/Japan/PG-75246/2021 | EPI_ISL_3873675 | 2021-09-02      |
| hCoV-19/Japan/PG-75247/2021 | EPI_ISL_3873676 | 2021-09-02      |
| hCoV-19/Japan/PG-75248/2021 | EPI_ISL_3873677 | 2021-09-02      |
| hCoV-19/Japan/PG-75249/2021 | EPI_ISL_3873678 | 2021-09-02      |
| hCoV-19/Japan/PG-75250/2021 | EPI_ISL_3873679 | 2021-09-02      |
| hCoV-19/Japan/PG-75251/2021 | EPI_ISL_3875523 | 2021-09-02      |
| hCoV-19/Japan/PG-75252/2021 | EPI_ISL_3875524 | 2021-09-02      |
| hCoV-19/Japan/PG-75253/2021 | EPI_ISL_3875525 | 2021-09-02      |
| hCoV-19/Japan/PG-75254/2021 | EPI_ISL_3875526 | 2021-09-02      |
| hCoV-19/Japan/PG-75255/2021 | EPI_ISL_3875527 | 2021-09-02      |
| hCoV-19/Japan/PG-75256/2021 | EPI_ISL_3875528 | 2021-09-02      |
| hCoV-19/Japan/PG-75257/2021 | EPI_ISL_3875529 | 2021-09-02      |
| hCoV-19/Japan/PG-75258/2021 | EPI_ISL_3875530 | 2021-09-02      |
| hCoV-19/Japan/PG-75259/2021 | EPI_ISL_3875531 | 2021-09-02      |
| hCoV-19/Japan/PG-75260/2021 | EPI_ISL_3875532 | 2021-09-02      |
| hCoV-19/Japan/PG-75261/2021 | EPI_ISL_3875533 | 2021-09-02      |
| hCoV-19/Japan/PG-75262/2021 | EPI_ISL_3875534 | 2021-09-02      |
| hCoV-19/Japan/PG-75263/2021 | EPI_ISL_3875535 | 2021-09-02      |
| hCoV-19/Japan/PG-75264/2021 | EPI_ISL_3875536 | 2021-09-02      |
| hCoV-19/Japan/PG-75265/2021 | EPI_ISL_3875537 | 2021-09-02      |
| hCoV-19/Japan/PG-75266/2021 | EPI_ISL_3875538 | 2021-09-02      |
| hCoV-19/Japan/PG-75267/2021 | EPI_ISL_3875539 | 2021-09-02      |
| hCoV-19/Japan/PG-75268/2021 | EPI_ISL_3875540 | 2021-09-02      |
| hCoV-19/Japan/PG-75269/2021 | EPI_ISL_3875541 | 2021-09-02      |
| hCoV-19/Japan/PG-75270/2021 | EPI_ISL_3875542 | 2021-09-02      |
| hCoV-19/Japan/PG-75271/2021 | EPI_ISL_3875543 | 2021-09-02      |
| hCoV-19/Japan/PG-75272/2021 | EPI_ISL_3875544 | 2021-09-02      |
| hCoV-19/Japan/PG-75273/2021 | EPI_ISL_3875545 | 2021-09-02      |

| virus_name                  | epiID           | submission_date |
|-----------------------------|-----------------|-----------------|
| hCoV-19/Japan/PG-75274/2021 | EPI_ISL_3875546 | 2021-09-02      |
| hCoV-19/Japan/PG-75275/2021 | EPI_ISL_3875547 | 2021-09-02      |
| hCoV-19/Japan/PG-75276/2021 | EPI_ISL_3875548 | 2021-09-02      |
| hCoV-19/Japan/PG-75277/2021 | EPI_ISL_3875549 | 2021-09-02      |
| hCoV-19/Japan/PG-75278/2021 | EPI_ISL_3875550 | 2021-09-02      |
| hCoV-19/Japan/PG-75279/2021 | EPI_ISL_3875551 | 2021-09-02      |
| hCoV-19/Japan/PG-75280/2021 | EPI_ISL_3875824 | 2021-09-02      |
| hCoV-19/Japan/PG-75281/2021 | EPI_ISL_3875825 | 2021-09-02      |
| hCoV-19/Japan/PG-75282/2021 | EPI_ISL_3875826 | 2021-09-02      |
| hCoV-19/Japan/PG-75283/2021 | EPI_ISL_3875827 | 2021-09-02      |
| hCoV-19/Japan/PG-75284/2021 | EPI_ISL_3875828 | 2021-09-02      |
| hCoV-19/Japan/PG-75285/2021 | EPI_ISL_3875829 | 2021-09-02      |
| hCoV-19/Japan/PG-75286/2021 | EPI_ISL_3875830 | 2021-09-02      |
| hCoV-19/Japan/PG-75287/2021 | EPI_ISL_3875831 | 2021-09-02      |
| hCoV-19/Japan/PG-75288/2021 | EPI_ISL_3875832 | 2021-09-02      |
| hCoV-19/Japan/PG-75289/2021 | EPI_ISL_3875833 | 2021-09-02      |
| hCoV-19/Japan/PG-75290/2021 | EPI_ISL_3875834 | 2021-09-02      |
| hCoV-19/Japan/PG-75291/2021 | EPI_ISL_3875835 | 2021-09-02      |
| hCoV-19/Japan/PG-75292/2021 | EPI_ISL_3875836 | 2021-09-02      |
| hCoV-19/Japan/PG-75293/2021 | EPI_ISL_3875837 | 2021-09-02      |
| hCoV-19/Japan/PG-75294/2021 | EPI_ISL_3875838 | 2021-09-02      |
| hCoV-19/Japan/PG-75295/2021 | EPI_ISL_3870615 | 2021-09-02      |
| hCoV-19/Japan/PG-75296/2021 | EPI_ISL_3870616 | 2021-09-02      |
| hCoV-19/Japan/PG-75297/2021 | EPI_ISL_3870617 | 2021-09-02      |
| hCoV-19/Japan/PG-75298/2021 | EPI_ISL_3870618 | 2021-09-02      |
| hCoV-19/Japan/PG-75299/2021 | EPI_ISL_3870619 | 2021-09-02      |
| hCoV-19/Japan/PG-75300/2021 | EPI_ISL_3870620 | 2021-09-02      |
| hCoV-19/Japan/PG-75301/2021 | EPI_ISL_3870621 | 2021-09-02      |
| hCoV-19/Japan/PG-75302/2021 | EPI_ISL_3870622 | 2021-09-02      |
| hCoV-19/Japan/PG-75303/2021 | EPI_ISL_3870623 | 2021-09-02      |
| hCoV-19/Japan/PG-75304/2021 | EPI_ISL_3870624 | 2021-09-02      |
| hCoV-19/Japan/PG-75305/2021 | EPI_ISL_3870625 | 2021-09-02      |
| hCoV-19/Japan/PG-75306/2021 | EPI_ISL_3870626 | 2021-09-02      |
| hCoV-19/Japan/PG-75307/2021 | EPI_ISL_3870627 | 2021-09-02      |
| hCoV-19/Japan/PG-75308/2021 | EPI_ISL_3870628 | 2021-09-02      |
| hCoV-19/Japan/PG-75309/2021 | EPI_ISL_3870629 | 2021-09-02      |
| hCoV-19/Japan/PG-75310/2021 | EPI_ISL_3872382 | 2021-09-02      |
| hCoV-19/Japan/PG-75311/2021 | EPI_ISL_3872383 | 2021-09-02      |
| hCoV-19/Japan/PG-75312/2021 | EPI_ISL_3872384 | 2021-09-02      |
| hCoV-19/Japan/PG-75313/2021 | EPI_ISL_3872385 | 2021-09-02      |
| hCoV-19/Japan/PG-75314/2021 | EPI_ISL_3872386 | 2021-09-02      |
| hCoV-19/Japan/PG-75315/2021 | EPI_ISL_3872387 | 2021-09-02      |
| hCoV-19/Japan/PG-75316/2021 | EPI_ISL_3872388 | 2021-09-02      |
| hCoV-19/Japan/PG-75317/2021 | EPI_ISL_3872389 | 2021-09-02      |
| hCoV-19/Japan/PG-75318/2021 | EPI_ISL_3872390 | 2021-09-02      |
| hCoV-19/Japan/PG-75319/2021 | EPI_ISL_3872391 | 2021-09-02      |
| hCoV-19/Japan/PG-75320/2021 | EPI_ISL_3872392 | 2021-09-02      |
| hCoV-19/Japan/PG-75321/2021 | EPI_ISL_3872393 | 2021-09-02      |
| hCoV-19/Japan/PG-75322/2021 | EPI_ISL_3872394 | 2021-09-02      |
| hCoV-19/Japan/PG-75323/2021 | EPI_ISL_3872395 | 2021-09-02      |
| hCoV-19/Japan/PG-75324/2021 | EPI_ISL_3872396 | 2021-09-02      |
| hCoV-19/Japan/PG-75325/2021 | EPI_ISL_3872397 | 2021-09-02      |
| hCoV-19/Japan/PG-75326/2021 | EPI_ISL_3872398 | 2021-09-02      |
| hCoV-19/Japan/PG-75327/2021 | EPI_ISL_3872399 | 2021-09-02      |

| virus_name                  | epiID           | submission_date |
|-----------------------------|-----------------|-----------------|
| hCoV-19/Japan/PG-75328/2021 | EPI_ISL_3872400 | 2021-09-02      |
| hCoV-19/Japan/PG-75329/2021 | EPI_ISL_3872401 | 2021-09-02      |
| hCoV-19/Japan/PG-75330/2021 | EPI_ISL_3871574 | 2021-09-02      |
| hCoV-19/Japan/PG-75331/2021 | EPI_ISL_3871575 | 2021-09-02      |
| hCoV-19/Japan/PG-75332/2021 | EPI_ISL_3871576 | 2021-09-02      |
| hCoV-19/Japan/PG-75333/2021 | EPI_ISL_3871577 | 2021-09-02      |
| hCoV-19/Japan/PG-75334/2021 | EPI_ISL_3871578 | 2021-09-02      |
| hCoV-19/Japan/PG-75335/2021 | EPI_ISL_3871579 | 2021-09-02      |
| hCoV-19/Japan/PG-75336/2021 | EPI_ISL_3871580 | 2021-09-02      |
| hCoV-19/Japan/PG-75337/2021 | EPI_ISL_3871581 | 2021-09-02      |
| hCoV-19/Japan/PG-75338/2021 | EPI_ISL_3871582 | 2021-09-02      |
| hCoV-19/Japan/PG-75339/2021 | EPI_ISL_3871583 | 2021-09-02      |
| hCoV-19/Japan/PG-75340/2021 | EPI_ISL_3871584 | 2021-09-02      |
| hCoV-19/Japan/PG-75341/2021 | EPI_ISL_3871585 | 2021-09-02      |
| hCoV-19/Japan/PG-75342/2021 | EPI_ISL_3871444 | 2021-09-02      |
| hCoV-19/Japan/PG-75343/2021 | EPI_ISL_3871445 | 2021-09-02      |
| hCoV-19/Japan/PG-75344/2021 | EPI_ISL_3871446 | 2021-09-02      |
| hCoV-19/Japan/PG-75345/2021 | EPI_ISL_3871447 | 2021-09-02      |
| hCoV-19/Japan/PG-75346/2021 | EPI_ISL_3871448 | 2021-09-02      |
| hCoV-19/Japan/PG-75347/2021 | EPI_ISL_3871449 | 2021-09-02      |
| hCoV-19/Japan/PG-75348/2021 | EPI_ISL_3871450 | 2021-09-02      |
| hCoV-19/Japan/PG-75349/2021 | EPI_ISL_3871451 | 2021-09-02      |
| hCoV-19/Japan/PG-75350/2021 | EPI_ISL_3874487 | 2021-09-02      |
| hCoV-19/Japan/PG-75351/2021 | EPI_ISL_3874488 | 2021-09-02      |
| hCoV-19/Japan/PG-75352/2021 | EPI_ISL_3874489 | 2021-09-02      |
| hCoV-19/Japan/PG-75353/2021 | EPI_ISL_3874490 | 2021-09-02      |
| hCoV-19/Japan/PG-75354/2021 | EPI_ISL_3874491 | 2021-09-02      |
| hCoV-19/Japan/PG-75355/2021 | EPI_ISL_3874492 | 2021-09-02      |
| hCoV-19/Japan/PG-75356/2021 | EPI_ISL_3874493 | 2021-09-02      |
| hCoV-19/Japan/PG-75357/2021 | EPI_ISL_3874494 | 2021-09-02      |
| hCoV-19/Japan/PG-75358/2021 | EPI_ISL_3874495 | 2021-09-02      |
| hCoV-19/Japan/PG-75359/2021 | EPI_ISL_3874496 | 2021-09-02      |
| hCoV-19/Japan/PG-75360/2021 | EPI_ISL_3871997 | 2021-09-02      |
| hCoV-19/Japan/PG-75361/2021 | EPI_ISL_3871998 | 2021-09-02      |
| hCoV-19/Japan/PG-75362/2021 | EPI_ISL_3871999 | 2021-09-02      |
| hCoV-19/Japan/PG-75363/2021 | EPI_ISL_3872000 | 2021-09-02      |
| hCoV-19/Japan/PG-75364/2021 | EPI_ISL_3872001 | 2021-09-02      |
| hCoV-19/Japan/PG-75365/2021 | EPI_ISL_3872002 | 2021-09-02      |
| hCoV-19/Japan/PG-75366/2021 | EPI_ISL_3872003 | 2021-09-02      |
| hCoV-19/Japan/PG-75367/2021 | EPI_ISL_3872004 | 2021-09-02      |
| hCoV-19/Japan/PG-75368/2021 | EPI_ISL_3872005 | 2021-09-02      |
| hCoV-19/Japan/PG-75369/2021 | EPI_ISL_3872006 | 2021-09-02      |
| hCoV-19/Japan/PG-75370/2021 | EPI_ISL_3872007 | 2021-09-02      |
| hCoV-19/Japan/PG-75371/2021 | EPI_ISL_3872008 | 2021-09-02      |
| hCoV-19/Japan/PG-75372/2021 | EPI_ISL_3872009 | 2021-09-02      |
| hCoV-19/Japan/PG-75373/2021 | EPI_ISL_3872010 | 2021-09-02      |
| hCoV-19/Japan/PG-75374/2021 | EPI_ISL_3872011 | 2021-09-02      |
| hCoV-19/Japan/PG-75375/2021 | EPI_ISL_3872012 | 2021-09-02      |
| hCoV-19/Japan/PG-75376/2021 | EPI_ISL_3872013 | 2021-09-02      |
| hCoV-19/Japan/PG-75377/2021 | EPI_ISL_3872014 | 2021-09-02      |
| hCoV-19/Japan/PG-75378/2021 | EPI_ISL_3872015 | 2021-09-02      |
| hCoV-19/Japan/PG-75379/2021 | EPI_ISL_3872016 | 2021-09-02      |
| hCoV-19/Japan/PG-75380/2021 | EPI_ISL_3872017 | 2021-09-02      |
| hCoV-19/Japan/PG-75381/2021 | EPI_ISL_3872018 | 2021-09-02      |

| virus_name                  | epiID           | submission_date |
|-----------------------------|-----------------|-----------------|
| hCoV-19/Japan/PG-75382/2021 | EPI_ISL_3872019 | 2021-09-02      |
| hCoV-19/Japan/PG-75383/2021 | EPI_ISL_3872020 | 2021-09-02      |
| hCoV-19/Japan/PG-75384/2021 | EPI_ISL_3872021 | 2021-09-02      |
| hCoV-19/Japan/PG-75385/2021 | EPI_ISL_3872022 | 2021-09-02      |
| hCoV-19/Japan/PG-75386/2021 | EPI_ISL_3872023 | 2021-09-02      |
| hCoV-19/Japan/PG-75387/2021 | EPI_ISL_3872024 | 2021-09-02      |
| hCoV-19/Japan/PG-75388/2021 | EPI_ISL_3872025 | 2021-09-02      |
| hCoV-19/Japan/PG-75389/2021 | EPI_ISL_3872026 | 2021-09-02      |
| hCoV-19/Japan/PG-75390/2021 | EPI_ISL_3872027 | 2021-09-02      |
| hCoV-19/Japan/PG-75391/2021 | EPI_ISL_3872028 | 2021-09-02      |
| hCoV-19/Japan/PG-75392/2021 | EPI_ISL_3872029 | 2021-09-02      |
| hCoV-19/Japan/PG-75393/2021 | EPI_ISL_3872030 | 2021-09-02      |
| hCoV-19/Japan/PG-75394/2021 | EPI_ISL_3872031 | 2021-09-02      |
| hCoV-19/Japan/PG-75395/2021 | EPI_ISL_3872032 | 2021-09-02      |
| hCoV-19/Japan/PG-75396/2021 | EPI_ISL_3872033 | 2021-09-02      |
| hCoV-19/Japan/PG-75397/2021 | EPI_ISL_3872034 | 2021-09-02      |
| hCoV-19/Japan/PG-75398/2021 | EPI_ISL_3872035 | 2021-09-02      |
| hCoV-19/Japan/PG-75399/2021 | EPI_ISL_3872036 | 2021-09-02      |
| hCoV-19/Japan/PG-75400/2021 | EPI_ISL_3872037 | 2021-09-02      |
| hCoV-19/Japan/PG-75401/2021 | EPI_ISL_3872038 | 2021-09-02      |
| hCoV-19/Japan/PG-75402/2021 | EPI_ISL_3872039 | 2021-09-02      |
| hCoV-19/Japan/PG-75403/2021 | EPI_ISL_3872040 | 2021-09-02      |
| hCoV-19/Japan/PG-75404/2021 | EPI_ISL_3874283 | 2021-09-02      |
| hCoV-19/Japan/PG-75405/2021 | EPI_ISL_3874284 | 2021-09-02      |
| hCoV-19/Japan/PG-75406/2021 | EPI_ISL_3874285 | 2021-09-02      |
| hCoV-19/Japan/PG-75407/2021 | EPI_ISL_3874286 | 2021-09-02      |
| hCoV-19/Japan/PG-75408/2021 | EPI_ISL_3874287 | 2021-09-02      |
| hCoV-19/Japan/PG-75409/2021 | EPI_ISL_3874288 | 2021-09-02      |
| hCoV-19/Japan/PG-75410/2021 | EPI_ISL_3874289 | 2021-09-02      |
| hCoV-19/Japan/PG-75411/2021 | EPI_ISL_3874290 | 2021-09-02      |
| hCoV-19/Japan/PG-75412/2021 | EPI_ISL_3874291 | 2021-09-02      |
| hCoV-19/Japan/PG-75413/2021 | EPI_ISL_3874292 | 2021-09-02      |
| hCoV-19/Japan/PG-75414/2021 | EPI_ISL_3874293 | 2021-09-02      |
| hCoV-19/Japan/PG-75415/2021 | EPI_ISL_3874294 | 2021-09-02      |
| hCoV-19/Japan/PG-75416/2021 | EPI_ISL_3874295 | 2021-09-02      |
| hCoV-19/Japan/PG-75417/2021 | EPI_ISL_3874296 | 2021-09-02      |
| hCoV-19/Japan/PG-75418/2021 | EPI_ISL_3874297 | 2021-09-02      |
| hCoV-19/Japan/PG-75419/2021 | EPI_ISL_3874298 | 2021-09-02      |
| hCoV-19/Japan/PG-75420/2021 | EPI_ISL_3874299 | 2021-09-02      |
| hCoV-19/Japan/PG-75421/2021 | EPI_ISL_3874300 | 2021-09-02      |
| hCoV-19/Japan/PG-75422/2021 | EPI_ISL_3874301 | 2021-09-02      |
| hCoV-19/Japan/PG-75423/2021 | EPI_ISL_3874302 | 2021-09-02      |
| hCoV-19/Japan/PG-75424/2021 | EPI_ISL_3874303 | 2021-09-02      |
| hCoV-19/Japan/PG-75425/2021 | EPI_ISL_3874304 | 2021-09-02      |
| hCoV-19/Japan/PG-75426/2021 | EPI_ISL_3873365 | 2021-09-02      |
| hCoV-19/Japan/PG-75427/2021 | EPI_ISL_3873366 | 2021-09-02      |
| hCoV-19/Japan/PG-75428/2021 | EPI_ISL_3873367 | 2021-09-02      |
| hCoV-19/Japan/PG-75429/2021 | EPI_ISL_3873368 | 2021-09-02      |
| hCoV-19/Japan/PG-75430/2021 | EPI_ISL_3873369 | 2021-09-02      |
| hCoV-19/Japan/PG-75431/2021 | EPI_ISL_3873370 | 2021-09-02      |
| hCoV-19/Japan/PG-75432/2021 | EPI_ISL_3873371 | 2021-09-02      |
| hCoV-19/Japan/PG-75433/2021 | EPI_ISL_3873372 | 2021-09-02      |
| hCoV-19/Japan/PG-75434/2021 | EPI_ISL_3873373 | 2021-09-02      |
| hCoV-19/Japan/PG-75435/2021 | EPI_ISL_3873374 | 2021-09-02      |



| virus_name                  | epiID           | submission_date |
|-----------------------------|-----------------|-----------------|
| hCoV-19/Japan/PG-75436/2021 | EPI_ISL_3873375 | 2021-09-02      |
| hCoV-19/Japan/PG-75437/2021 | EPI_ISL_3873376 | 2021-09-02      |
| hCoV-19/Japan/PG-75438/2021 | EPI_ISL_3874528 | 2021-09-02      |
| hCoV-19/Japan/PG-75439/2021 | EPI_ISL_3874529 | 2021-09-02      |
| hCoV-19/Japan/PG-75440/2021 | EPI_ISL_3874530 | 2021-09-02      |
| hCoV-19/Japan/PG-75441/2021 | EPI_ISL_3874531 | 2021-09-02      |
| hCoV-19/Japan/PG-75442/2021 | EPI_ISL_3874532 | 2021-09-02      |
| hCoV-19/Japan/PG-75443/2021 | EPI_ISL_3874533 | 2021-09-02      |
| hCoV-19/Japan/PG-75444/2021 | EPI_ISL_3874534 | 2021-09-02      |
| hCoV-19/Japan/PG-75445/2021 | EPI_ISL_3874535 | 2021-09-02      |
| hCoV-19/Japan/PG-75446/2021 | EPI_ISL_3874536 | 2021-09-02      |
| hCoV-19/Japan/PG-75447/2021 | EPI_ISL_3874537 | 2021-09-02      |
| hCoV-19/Japan/PG-75448/2021 | EPI_ISL_3874538 | 2021-09-02      |
| hCoV-19/Japan/PG-75449/2021 | EPI_ISL_3874539 | 2021-09-02      |
| hCoV-19/Japan/PG-75450/2021 | EPI_ISL_3874540 | 2021-09-02      |
| hCoV-19/Japan/PG-75451/2021 | EPI_ISL_3874541 | 2021-09-02      |
| hCoV-19/Japan/PG-75452/2021 | EPI_ISL_3874542 | 2021-09-02      |
| hCoV-19/Japan/PG-75453/2021 | EPI_ISL_3874543 | 2021-09-02      |
| hCoV-19/Japan/PG-75454/2021 | EPI_ISL_3874544 | 2021-09-02      |
| hCoV-19/Japan/PG-75455/2021 | EPI_ISL_3884359 | 2021-09-02      |
| hCoV-19/Japan/PG-75456/2021 | EPI_ISL_3884366 | 2021-09-02      |
| hCoV-19/Japan/PG-75457/2021 | EPI_ISL_3884374 | 2021-09-02      |
| hCoV-19/Japan/PG-75458/2021 | EPI_ISL_3884382 | 2021-09-02      |
| hCoV-19/Japan/PG-75459/2021 | EPI_ISL_3884390 | 2021-09-02      |
| hCoV-19/Japan/PG-75460/2021 | EPI_ISL_3884398 | 2021-09-02      |
| hCoV-19/Japan/PG-75461/2021 | EPI_ISL_3884405 | 2021-09-02      |
| hCoV-19/Japan/PG-75462/2021 | EPI_ISL_3884412 | 2021-09-02      |
| hCoV-19/Japan/PG-75463/2021 | EPI_ISL_3884418 | 2021-09-02      |
| hCoV-19/Japan/PG-75464/2021 | EPI_ISL_3884426 | 2021-09-02      |
| hCoV-19/Japan/PG-75465/2021 | EPI_ISL_3884431 | 2021-09-02      |
| hCoV-19/Japan/PG-75466/2021 | EPI_ISL_3884440 | 2021-09-02      |
| hCoV-19/Japan/PG-75467/2021 | EPI_ISL_3884447 | 2021-09-02      |
| hCoV-19/Japan/PG-75468/2021 | EPI_ISL_3884456 | 2021-09-02      |
| hCoV-19/Japan/PG-75469/2021 | EPI_ISL_3884464 | 2021-09-02      |
| hCoV-19/Japan/PG-75470/2021 | EPI_ISL_3884471 | 2021-09-02      |
| hCoV-19/Japan/PG-75471/2021 | EPI_ISL_3884479 | 2021-09-02      |
| hCoV-19/Japan/PG-75472/2021 | EPI_ISL_3884504 | 2021-09-02      |
| hCoV-19/Japan/PG-75473/2021 | EPI_ISL_3884513 | 2021-09-02      |
| hCoV-19/Japan/PG-75474/2021 | EPI_ISL_3884519 | 2021-09-02      |
| hCoV-19/Japan/PG-75475/2021 | EPI_ISL_3884529 | 2021-09-02      |
| hCoV-19/Japan/PG-75476/2021 | EPI_ISL_3884537 | 2021-09-02      |
| hCoV-19/Japan/PG-75477/2021 | EPI_ISL_3884546 | 2021-09-02      |
| hCoV-19/Japan/PG-75478/2021 | EPI_ISL_3884552 | 2021-09-02      |
| hCoV-19/Japan/PG-75479/2021 | EPI_ISL_3884559 | 2021-09-02      |
| hCoV-19/Japan/PG-75480/2021 | EPI_ISL_3884568 | 2021-09-02      |
| hCoV-19/Japan/PG-75481/2021 | EPI_ISL_3884577 | 2021-09-02      |
| hCoV-19/Japan/PG-75482/2021 | EPI_ISL_3884585 | 2021-09-02      |
| hCoV-19/Japan/PG-75483/2021 | EPI_ISL_3884593 | 2021-09-02      |
| hCoV-19/Japan/PG-75484/2021 | EPI_ISL_3884603 | 2021-09-02      |
| hCoV-19/Japan/PG-75485/2021 | EPI_ISL_3884610 | 2021-09-02      |
| hCoV-19/Japan/PG-75486/2021 | EPI_ISL_3884619 | 2021-09-02      |
| hCoV-19/Japan/PG-75487/2021 | EPI_ISL_3884628 | 2021-09-02      |
| hCoV-19/Japan/PG-75488/2021 | EPI_ISL_3884635 | 2021-09-02      |
| hCoV-19/Japan/PG-75489/2021 | EPI_ISL_3884644 | 2021-09-02      |

| virus_name                  | epiID           | submission_date |
|-----------------------------|-----------------|-----------------|
| hCoV-19/Japan/PG-75490/2021 | EPI_ISL_3884653 | 2021-09-02      |
| hCoV-19/Japan/PG-75491/2021 | EPI_ISL_3884662 | 2021-09-02      |
| hCoV-19/Japan/PG-75492/2021 | EPI_ISL_3884670 | 2021-09-02      |
| hCoV-19/Japan/PG-75493/2021 | EPI_ISL_3884677 | 2021-09-02      |
| hCoV-19/Japan/PG-75494/2021 | EPI_ISL_3884686 | 2021-09-02      |
| hCoV-19/Japan/PG-75495/2021 | EPI_ISL_3884695 | 2021-09-02      |
| hCoV-19/Japan/PG-75496/2021 | EPI_ISL_3884704 | 2021-09-02      |
| hCoV-19/Japan/PG-75497/2021 | EPI_ISL_3884712 | 2021-09-02      |
| hCoV-19/Japan/PG-75498/2021 | EPI_ISL_3884723 | 2021-09-02      |
| hCoV-19/Japan/PG-75499/2021 | EPI_ISL_3884732 | 2021-09-02      |
| hCoV-19/Japan/PG-75500/2021 | EPI_ISL_3884739 | 2021-09-02      |
| hCoV-19/Japan/PG-75501/2021 | EPI_ISL_3884749 | 2021-09-02      |
| hCoV-19/Japan/PG-75502/2021 | EPI_ISL_3884757 | 2021-09-02      |
| hCoV-19/Japan/PG-75503/2021 | EPI_ISL_3884765 | 2021-09-02      |
| hCoV-19/Japan/PG-75504/2021 | EPI_ISL_3884771 | 2021-09-02      |
| hCoV-19/Japan/PG-75505/2021 | EPI_ISL_3884773 | 2021-09-02      |
| hCoV-19/Japan/PG-75506/2021 | EPI_ISL_3884775 | 2021-09-02      |
| hCoV-19/Japan/PG-75507/2021 | EPI_ISL_3884776 | 2021-09-02      |
| hCoV-19/Japan/PG-75508/2021 | EPI_ISL_3884777 | 2021-09-02      |
| hCoV-19/Japan/PG-75509/2021 | EPI_ISL_3884778 | 2021-09-02      |
| hCoV-19/Japan/PG-75510/2021 | EPI_ISL_3884780 | 2021-09-02      |
| hCoV-19/Japan/PG-75511/2021 | EPI_ISL_3884782 | 2021-09-02      |
| hCoV-19/Japan/PG-75512/2021 | EPI_ISL_3884785 | 2021-09-02      |
| hCoV-19/Japan/PG-75513/2021 | EPI_ISL_3884787 | 2021-09-02      |
| hCoV-19/Japan/PG-75514/2021 | EPI_ISL_3884790 | 2021-09-02      |
| hCoV-19/Japan/PG-75515/2021 | EPI_ISL_3884792 | 2021-09-02      |
| hCoV-19/Japan/PG-75516/2021 | EPI_ISL_3884794 | 2021-09-02      |
| hCoV-19/Japan/PG-75517/2021 | EPI_ISL_3884796 | 2021-09-02      |
| hCoV-19/Japan/PG-75518/2021 | EPI_ISL_3884798 | 2021-09-02      |
| hCoV-19/Japan/PG-75519/2021 | EPI_ISL_3884800 | 2021-09-02      |
| hCoV-19/Japan/PG-75520/2021 | EPI_ISL_3884802 | 2021-09-02      |
| hCoV-19/Japan/PG-75521/2021 | EPI_ISL_3884804 | 2021-09-02      |
| hCoV-19/Japan/PG-75522/2021 | EPI_ISL_3884807 | 2021-09-02      |
| hCoV-19/Japan/PG-75523/2021 | EPI_ISL_3884809 | 2021-09-02      |
| hCoV-19/Japan/PG-75524/2021 | EPI_ISL_3884812 | 2021-09-02      |
| hCoV-19/Japan/PG-75525/2021 | EPI_ISL_3884820 | 2021-09-02      |
| hCoV-19/Japan/PG-75526/2021 | EPI_ISL_3884828 | 2021-09-02      |
| hCoV-19/Japan/PG-75527/2021 | EPI_ISL_3884835 | 2021-09-02      |
| hCoV-19/Japan/PG-75528/2021 | EPI_ISL_3884843 | 2021-09-02      |
| hCoV-19/Japan/PG-75529/2021 | EPI_ISL_3884849 | 2021-09-02      |
| hCoV-19/Japan/PG-75530/2021 | EPI_ISL_3884857 | 2021-09-02      |
| hCoV-19/Japan/PG-75531/2021 | EPI_ISL_3884866 | 2021-09-02      |
| hCoV-19/Japan/PG-75532/2021 | EPI_ISL_3884875 | 2021-09-02      |
| hCoV-19/Japan/PG-75533/2021 | EPI_ISL_3884884 | 2021-09-02      |
| hCoV-19/Japan/PG-75534/2021 | EPI_ISL_3884890 | 2021-09-02      |
| hCoV-19/Japan/PG-75535/2021 | EPI_ISL_3884896 | 2021-09-02      |
| hCoV-19/Japan/PG-75536/2021 | EPI_ISL_3884904 | 2021-09-02      |
| hCoV-19/Japan/PG-75537/2021 | EPI_ISL_3884913 | 2021-09-02      |
| hCoV-19/Japan/PG-75538/2021 | EPI_ISL_3884921 | 2021-09-02      |
| hCoV-19/Japan/PG-75539/2021 | EPI_ISL_3884928 | 2021-09-02      |
| hCoV-19/Japan/PG-75540/2021 | EPI_ISL_3884935 | 2021-09-02      |
| hCoV-19/Japan/PG-75541/2021 | EPI_ISL_3884941 | 2021-09-02      |
| hCoV-19/Japan/PG-75542/2021 | EPI_ISL_3884950 | 2021-09-02      |
| hCoV-19/Japan/PG-75543/2021 | EPI_ISL_3884956 | 2021-09-02      |

| virus_name                  | epiID           | submission_date |
|-----------------------------|-----------------|-----------------|
| hCoV-19/Japan/PG-75544/2021 | EPI_ISL_3884965 | 2021-09-02      |
| hCoV-19/Japan/PG-75545/2021 | EPI_ISL_3884974 | 2021-09-02      |
| hCoV-19/Japan/PG-75546/2021 | EPI_ISL_3884983 | 2021-09-02      |
| hCoV-19/Japan/PG-75547/2021 | EPI_ISL_3884991 | 2021-09-02      |
| hCoV-19/Japan/PG-75548/2021 | EPI_ISL_3884998 | 2021-09-02      |
| hCoV-19/Japan/PG-75549/2021 | EPI_ISL_3885007 | 2021-09-02      |
| hCoV-19/Japan/PG-75550/2021 | EPI_ISL_3885016 | 2021-09-02      |
| hCoV-19/Japan/PG-75551/2021 | EPI_ISL_3885022 | 2021-09-02      |
| hCoV-19/Japan/PG-75552/2021 | EPI_ISL_3885031 | 2021-09-02      |
| hCoV-19/Japan/PG-75553/2021 | EPI_ISL_3885039 | 2021-09-02      |
| hCoV-19/Japan/PG-75554/2021 | EPI_ISL_3885047 | 2021-09-02      |
| hCoV-19/Japan/PG-75555/2021 | EPI_ISL_3885054 | 2021-09-02      |
| hCoV-19/Japan/PG-75556/2021 | EPI_ISL_3885061 | 2021-09-02      |
| hCoV-19/Japan/PG-75557/2021 | EPI_ISL_3885068 | 2021-09-02      |
| hCoV-19/Japan/PG-75558/2021 | EPI_ISL_3885075 | 2021-09-02      |
| hCoV-19/Japan/PG-75559/2021 | EPI_ISL_3885080 | 2021-09-02      |
| hCoV-19/Japan/PG-75560/2021 | EPI_ISL_3885086 | 2021-09-02      |
| hCoV-19/Japan/PG-75561/2021 | EPI_ISL_3885093 | 2021-09-02      |
| hCoV-19/Japan/PG-75562/2021 | EPI_ISL_3885101 | 2021-09-02      |
| hCoV-19/Japan/PG-75563/2021 | EPI_ISL_3885108 | 2021-09-02      |
| hCoV-19/Japan/PG-75564/2021 | EPI_ISL_3885115 | 2021-09-02      |
| hCoV-19/Japan/PG-75565/2021 | EPI_ISL_3885124 | 2021-09-02      |
| hCoV-19/Japan/PG-75566/2021 | EPI_ISL_3885131 | 2021-09-02      |
| hCoV-19/Japan/PG-75567/2021 | EPI_ISL_3885139 | 2021-09-02      |
| hCoV-19/Japan/PG-75568/2021 | EPI_ISL_3885146 | 2021-09-02      |
| hCoV-19/Japan/PG-75569/2021 | EPI_ISL_3885152 | 2021-09-02      |
| hCoV-19/Japan/PG-75570/2021 | EPI_ISL_3885160 | 2021-09-02      |
| hCoV-19/Japan/PG-75571/2021 | EPI_ISL_3885166 | 2021-09-02      |
| hCoV-19/Japan/PG-75572/2021 | EPI_ISL_3885174 | 2021-09-02      |
| hCoV-19/Japan/PG-75573/2021 | EPI_ISL_3885182 | 2021-09-02      |
| hCoV-19/Japan/PG-75574/2021 | EPI_ISL_3885189 | 2021-09-02      |
| hCoV-19/Japan/PG-75575/2021 | EPI_ISL_3885196 | 2021-09-02      |
| hCoV-19/Japan/PG-75576/2021 | EPI_ISL_3885204 | 2021-09-02      |
| hCoV-19/Japan/PG-75577/2021 | EPI_ISL_3885212 | 2021-09-02      |
| hCoV-19/Japan/PG-75578/2021 | EPI_ISL_3885219 | 2021-09-02      |
| hCoV-19/Japan/PG-75579/2021 | EPI_ISL_3885227 | 2021-09-02      |
| hCoV-19/Japan/PG-75580/2021 | EPI_ISL_3885235 | 2021-09-02      |
| hCoV-19/Japan/PG-75581/2021 | EPI_ISL_3885242 | 2021-09-02      |
| hCoV-19/Japan/PG-75582/2021 | EPI_ISL_3885251 | 2021-09-02      |
| hCoV-19/Japan/PG-75583/2021 | EPI_ISL_3885258 | 2021-09-02      |
| hCoV-19/Japan/PG-75584/2021 | EPI_ISL_3885266 | 2021-09-02      |
| hCoV-19/Japan/PG-75585/2021 | EPI_ISL_3885274 | 2021-09-02      |
| hCoV-19/Japan/PG-75586/2021 | EPI_ISL_3885283 | 2021-09-02      |
| hCoV-19/Japan/PG-75587/2021 | EPI_ISL_3885290 | 2021-09-02      |
| hCoV-19/Japan/PG-75588/2021 | EPI_ISL_3885298 | 2021-09-02      |
| hCoV-19/Japan/PG-75589/2021 | EPI_ISL_3885305 | 2021-09-02      |
| hCoV-19/Japan/PG-75590/2021 | EPI_ISL_3885313 | 2021-09-02      |
| hCoV-19/Japan/PG-75591/2021 | EPI_ISL_3885322 | 2021-09-02      |
| hCoV-19/Japan/PG-75592/2021 | EPI_ISL_3885330 | 2021-09-02      |
| hCoV-19/Japan/PG-75593/2021 | EPI_ISL_3885338 | 2021-09-02      |
| hCoV-19/Japan/PG-75594/2021 | EPI_ISL_3885345 | 2021-09-02      |
| hCoV-19/Japan/PG-75595/2021 | EPI_ISL_3885352 | 2021-09-02      |
| hCoV-19/Japan/PG-75596/2021 | EPI_ISL_3885360 | 2021-09-02      |
| hCoV-19/Japan/PG-75597/2021 | EPI_ISL_3885368 | 2021-09-02      |

| virus_name                  | epiID           | submission_date |
|-----------------------------|-----------------|-----------------|
| hCoV-19/Japan/PG-75598/2021 | EPI_ISL_3885376 | 2021-09-02      |
| hCoV-19/Japan/PG-75599/2021 | EPI_ISL_3885379 | 2021-09-02      |
| hCoV-19/Japan/PG-75600/2021 | EPI_ISL_3885382 | 2021-09-02      |
| hCoV-19/Japan/PG-75601/2021 | EPI_ISL_3885384 | 2021-09-02      |
| hCoV-19/Japan/PG-75602/2021 | EPI_ISL_3885387 | 2021-09-02      |
| hCoV-19/Japan/PG-75603/2021 | EPI_ISL_3885389 | 2021-09-02      |
| hCoV-19/Japan/PG-75604/2021 | EPI_ISL_3885391 | 2021-09-02      |
| hCoV-19/Japan/PG-75605/2021 | EPI_ISL_3885394 | 2021-09-02      |
| hCoV-19/Japan/PG-75606/2021 | EPI_ISL_3885396 | 2021-09-02      |
| hCoV-19/Japan/PG-75607/2021 | EPI_ISL_3885398 | 2021-09-02      |
| hCoV-19/Japan/PG-75608/2021 | EPI_ISL_3885400 | 2021-09-02      |
| hCoV-19/Japan/PG-75609/2021 | EPI_ISL_3885402 | 2021-09-02      |
| hCoV-19/Japan/PG-75610/2021 | EPI_ISL_3885404 | 2021-09-02      |
| hCoV-19/Japan/PG-75611/2021 | EPI_ISL_3885406 | 2021-09-02      |
| hCoV-19/Japan/PG-75612/2021 | EPI_ISL_3885408 | 2021-09-02      |
| hCoV-19/Japan/PG-75613/2021 | EPI_ISL_3885411 | 2021-09-02      |
| hCoV-19/Japan/PG-75614/2021 | EPI_ISL_3885413 | 2021-09-02      |
| hCoV-19/Japan/PG-75615/2021 | EPI_ISL_3885416 | 2021-09-02      |
| hCoV-19/Japan/PG-75616/2021 | EPI_ISL_3885417 | 2021-09-02      |
| hCoV-19/Japan/PG-75617/2021 | EPI_ISL_3885419 | 2021-09-02      |
| hCoV-19/Japan/PG-75618/2021 | EPI_ISL_3885420 | 2021-09-02      |
| hCoV-19/Japan/PG-75619/2021 | EPI_ISL_3885422 | 2021-09-02      |
| hCoV-19/Japan/PG-75620/2021 | EPI_ISL_3885425 | 2021-09-02      |
| hCoV-19/Japan/PG-75621/2021 | EPI_ISL_3885427 | 2021-09-02      |
| hCoV-19/Japan/PG-75622/2021 | EPI_ISL_3885430 | 2021-09-02      |
| hCoV-19/Japan/PG-75623/2021 | EPI_ISL_3885432 | 2021-09-02      |
| hCoV-19/Japan/PG-75624/2021 | EPI_ISL_3885434 | 2021-09-02      |
| hCoV-19/Japan/PG-75625/2021 | EPI_ISL_3885437 | 2021-09-02      |
| hCoV-19/Japan/PG-75626/2021 | EPI_ISL_3885438 | 2021-09-02      |
| hCoV-19/Japan/PG-75627/2021 | EPI_ISL_3885441 | 2021-09-02      |
| hCoV-19/Japan/PG-75628/2021 | EPI_ISL_3885443 | 2021-09-02      |
| hCoV-19/Japan/PG-75629/2021 | EPI_ISL_3885446 | 2021-09-02      |
| hCoV-19/Japan/PG-75630/2021 | EPI_ISL_3885448 | 2021-09-02      |
| hCoV-19/Japan/PG-75631/2021 | EPI_ISL_3885450 | 2021-09-02      |
| hCoV-19/Japan/PG-75632/2021 | EPI_ISL_3885453 | 2021-09-02      |
| hCoV-19/Japan/PG-75633/2021 | EPI_ISL_3885455 | 2021-09-02      |
| hCoV-19/Japan/PG-75634/2021 | EPI_ISL_3885457 | 2021-09-02      |
| hCoV-19/Japan/PG-75635/2021 | EPI_ISL_3885459 | 2021-09-02      |
| hCoV-19/Japan/PG-75636/2021 | EPI_ISL_3885460 | 2021-09-02      |
| hCoV-19/Japan/PG-75637/2021 | EPI_ISL_3885462 | 2021-09-02      |
| hCoV-19/Japan/PG-75638/2021 | EPI_ISL_3885464 | 2021-09-02      |
| hCoV-19/Japan/PG-75639/2021 | EPI_ISL_3885466 | 2021-09-02      |
| hCoV-19/Japan/PG-75640/2021 | EPI_ISL_3885468 | 2021-09-02      |
| hCoV-19/Japan/PG-75641/2021 | EPI_ISL_3885471 | 2021-09-02      |
| hCoV-19/Japan/PG-75642/2021 | EPI_ISL_3885473 | 2021-09-02      |
| hCoV-19/Japan/PG-75643/2021 | EPI_ISL_3885475 | 2021-09-02      |
| hCoV-19/Japan/PG-75644/2021 | EPI_ISL_3885477 | 2021-09-02      |
| hCoV-19/Japan/PG-75645/2021 | EPI_ISL_3885479 | 2021-09-02      |
| hCoV-19/Japan/PG-75646/2021 | EPI_ISL_3885480 | 2021-09-02      |
| hCoV-19/Japan/PG-75647/2021 | EPI_ISL_3885483 | 2021-09-02      |
| hCoV-19/Japan/PG-75648/2021 | EPI_ISL_3885484 | 2021-09-02      |
| hCoV-19/Japan/PG-75649/2021 | EPI_ISL_3885485 | 2021-09-02      |
| hCoV-19/Japan/PG-75650/2021 | EPI_ISL_3885488 | 2021-09-02      |
| hCoV-19/Japan/PG-75651/2021 | EPI_ISL_3885489 | 2021-09-02      |

| virus_name                  | epiID           | submission_date |
|-----------------------------|-----------------|-----------------|
| hCoV-19/Japan/PG-75652/2021 | EPI_ISL_3885491 | 2021-09-02      |
| hCoV-19/Japan/PG-75653/2021 | EPI_ISL_3885493 | 2021-09-02      |
| hCoV-19/Japan/PG-75654/2021 | EPI_ISL_3885495 | 2021-09-02      |
| hCoV-19/Japan/PG-75655/2021 | EPI_ISL_3885497 | 2021-09-02      |
| hCoV-19/Japan/PG-75656/2021 | EPI_ISL_3885499 | 2021-09-02      |
| hCoV-19/Japan/PG-75657/2021 | EPI_ISL_3885502 | 2021-09-02      |
| hCoV-19/Japan/PG-75658/2021 | EPI_ISL_3885505 | 2021-09-02      |
| hCoV-19/Japan/PG-75659/2021 | EPI_ISL_3885506 | 2021-09-02      |
| hCoV-19/Japan/PG-75660/2021 | EPI_ISL_3885509 | 2021-09-02      |
| hCoV-19/Japan/PG-75661/2021 | EPI_ISL_3885512 | 2021-09-02      |
| hCoV-19/Japan/PG-75662/2021 | EPI_ISL_3885513 | 2021-09-02      |
| hCoV-19/Japan/PG-75663/2021 | EPI_ISL_3885516 | 2021-09-02      |
| hCoV-19/Japan/PG-75664/2021 | EPI_ISL_3885518 | 2021-09-02      |
| hCoV-19/Japan/PG-75665/2021 | EPI_ISL_3885521 | 2021-09-02      |
| hCoV-19/Japan/PG-75666/2021 | EPI_ISL_3885524 | 2021-09-02      |
| hCoV-19/Japan/PG-75667/2021 | EPI_ISL_3885526 | 2021-09-02      |
| hCoV-19/Japan/PG-75668/2021 | EPI_ISL_3885528 | 2021-09-02      |
| hCoV-19/Japan/PG-75669/2021 | EPI_ISL_3885530 | 2021-09-02      |
| hCoV-19/Japan/PG-75670/2021 | EPI_ISL_3885533 | 2021-09-02      |
| hCoV-19/Japan/PG-75671/2021 | EPI_ISL_3885535 | 2021-09-02      |
| hCoV-19/Japan/PG-75672/2021 | EPI_ISL_3885538 | 2021-09-02      |
| hCoV-19/Japan/PG-75673/2021 | EPI_ISL_3885540 | 2021-09-02      |
| hCoV-19/Japan/PG-75674/2021 | EPI_ISL_3885542 | 2021-09-02      |
| hCoV-19/Japan/PG-75675/2021 | EPI_ISL_3885544 | 2021-09-02      |
| hCoV-19/Japan/PG-75676/2021 | EPI_ISL_3885547 | 2021-09-02      |
| hCoV-19/Japan/PG-75677/2021 | EPI_ISL_3885549 | 2021-09-02      |
| hCoV-19/Japan/PG-75678/2021 | EPI_ISL_3885551 | 2021-09-02      |
| hCoV-19/Japan/PG-75679/2021 | EPI_ISL_3885553 | 2021-09-02      |
| hCoV-19/Japan/PG-75680/2021 | EPI_ISL_3885556 | 2021-09-02      |
| hCoV-19/Japan/PG-75681/2021 | EPI_ISL_3885557 | 2021-09-02      |
| hCoV-19/Japan/PG-75682/2021 | EPI_ISL_3885558 | 2021-09-02      |
| hCoV-19/Japan/PG-75683/2021 | EPI_ISL_3885560 | 2021-09-02      |
| hCoV-19/Japan/PG-75684/2021 | EPI_ISL_3885563 | 2021-09-02      |
| hCoV-19/Japan/PG-75685/2021 | EPI_ISL_3885565 | 2021-09-02      |
| hCoV-19/Japan/PG-75686/2021 | EPI_ISL_3885566 | 2021-09-02      |
| hCoV-19/Japan/PG-75687/2021 | EPI_ISL_3885567 | 2021-09-02      |
| hCoV-19/Japan/PG-75688/2021 | EPI_ISL_3885569 | 2021-09-02      |
| hCoV-19/Japan/PG-75689/2021 | EPI_ISL_3885571 | 2021-09-02      |
| hCoV-19/Japan/PG-75690/2021 | EPI_ISL_3885573 | 2021-09-02      |
| hCoV-19/Japan/PG-75691/2021 | EPI_ISL_3885575 | 2021-09-02      |
| hCoV-19/Japan/PG-75692/2021 | EPI_ISL_3885577 | 2021-09-02      |
| hCoV-19/Japan/PG-75693/2021 | EPI_ISL_3885580 | 2021-09-02      |
| hCoV-19/Japan/PG-75694/2021 | EPI_ISL_3885583 | 2021-09-02      |
| hCoV-19/Japan/PG-75695/2021 | EPI_ISL_3885585 | 2021-09-02      |
| hCoV-19/Japan/PG-75696/2021 | EPI_ISL_3885587 | 2021-09-02      |
| hCoV-19/Japan/PG-75697/2021 | EPI_ISL_3885590 | 2021-09-02      |
| hCoV-19/Japan/PG-75698/2021 | EPI_ISL_3885593 | 2021-09-02      |
| hCoV-19/Japan/PG-75699/2021 | EPI_ISL_3885595 | 2021-09-02      |
| hCoV-19/Japan/PG-75700/2021 | EPI_ISL_3885598 | 2021-09-02      |
| hCoV-19/Japan/PG-75701/2021 | EPI_ISL_3885600 | 2021-09-02      |
| hCoV-19/Japan/PG-75702/2021 | EPI_ISL_3885602 | 2021-09-02      |
| hCoV-19/Japan/PG-75703/2021 | EPI_ISL_3885604 | 2021-09-02      |
| hCoV-19/Japan/PG-75704/2021 | EPI_ISL_3885606 | 2021-09-02      |
| hCoV-19/Japan/PG-75705/2021 | EPI_ISL_3885608 | 2021-09-02      |

| virus_name                  | epiID           | submission_date |
|-----------------------------|-----------------|-----------------|
| hCoV-19/Japan/PG-75706/2021 | EPI_ISL_3885610 | 2021-09-02      |
| hCoV-19/Japan/PG-75707/2021 | EPI_ISL_3885612 | 2021-09-02      |
| hCoV-19/Japan/PG-75708/2021 | EPI_ISL_3885614 | 2021-09-02      |
| hCoV-19/Japan/PG-75709/2021 | EPI_ISL_3885616 | 2021-09-02      |
| hCoV-19/Japan/PG-75710/2021 | EPI_ISL_3885618 | 2021-09-02      |
| hCoV-19/Japan/PG-75711/2021 | EPI_ISL_3885620 | 2021-09-02      |
| hCoV-19/Japan/PG-75712/2021 | EPI_ISL_3885623 | 2021-09-02      |
| hCoV-19/Japan/PG-75713/2021 | EPI_ISL_3885625 | 2021-09-02      |
| hCoV-19/Japan/PG-75714/2021 | EPI_ISL_3885628 | 2021-09-02      |
| hCoV-19/Japan/PG-75715/2021 | EPI_ISL_3885630 | 2021-09-02      |
| hCoV-19/Japan/PG-75716/2021 | EPI_ISL_3885632 | 2021-09-02      |
| hCoV-19/Japan/PG-75717/2021 | EPI_ISL_3885635 | 2021-09-02      |
| hCoV-19/Japan/PG-75718/2021 | EPI_ISL_3885637 | 2021-09-02      |
| hCoV-19/Japan/PG-75719/2021 | EPI_ISL_3885641 | 2021-09-02      |
| hCoV-19/Japan/PG-75720/2021 | EPI_ISL_3885645 | 2021-09-02      |
| hCoV-19/Japan/PG-75721/2021 | EPI_ISL_3885648 | 2021-09-02      |
| hCoV-19/Japan/PG-75722/2021 | EPI_ISL_3885653 | 2021-09-02      |
| hCoV-19/Japan/PG-75723/2021 | EPI_ISL_3885657 | 2021-09-02      |
| hCoV-19/Japan/PG-75724/2021 | EPI_ISL_3885661 | 2021-09-02      |
| hCoV-19/Japan/PG-75725/2021 | EPI_ISL_3885666 | 2021-09-02      |
| hCoV-19/Japan/PG-75726/2021 | EPI_ISL_3885670 | 2021-09-02      |
| hCoV-19/Japan/PG-75727/2021 | EPI_ISL_3885675 | 2021-09-02      |
| hCoV-19/Japan/PG-75728/2021 | EPI_ISL_3885678 | 2021-09-02      |
| hCoV-19/Japan/PG-75729/2021 | EPI_ISL_3885682 | 2021-09-02      |
| hCoV-19/Japan/PG-75730/2021 | EPI_ISL_3885687 | 2021-09-02      |
| hCoV-19/Japan/PG-75731/2021 | EPI_ISL_3885692 | 2021-09-02      |
| hCoV-19/Japan/PG-75732/2021 | EPI_ISL_3885697 | 2021-09-02      |
| hCoV-19/Japan/PG-75733/2021 | EPI_ISL_3885701 | 2021-09-02      |
| hCoV-19/Japan/PG-75734/2021 | EPI_ISL_3885705 | 2021-09-02      |
| hCoV-19/Japan/PG-75735/2021 | EPI_ISL_3885708 | 2021-09-02      |
| hCoV-19/Japan/PG-75736/2021 | EPI_ISL_3885710 | 2021-09-02      |
| hCoV-19/Japan/PG-75737/2021 | EPI_ISL_3885711 | 2021-09-02      |
| hCoV-19/Japan/PG-75738/2021 | EPI_ISL_3885712 | 2021-09-02      |
| hCoV-19/Japan/PG-75739/2021 | EPI_ISL_3885715 | 2021-09-02      |
| hCoV-19/Japan/PG-75740/2021 | EPI_ISL_3885718 | 2021-09-02      |
| hCoV-19/Japan/PG-75741/2021 | EPI_ISL_3885720 | 2021-09-02      |
| hCoV-19/Japan/PG-75742/2021 | EPI_ISL_3885723 | 2021-09-02      |
| hCoV-19/Japan/PG-75743/2021 | EPI_ISL_3885725 | 2021-09-02      |
| hCoV-19/Japan/PG-75744/2021 | EPI_ISL_3885727 | 2021-09-02      |
| hCoV-19/Japan/PG-75745/2021 | EPI_ISL_3885728 | 2021-09-02      |
| hCoV-19/Japan/PG-75746/2021 | EPI_ISL_3885731 | 2021-09-02      |
| hCoV-19/Japan/PG-75747/2021 | EPI_ISL_3885733 | 2021-09-02      |
| hCoV-19/Japan/PG-75748/2021 | EPI_ISL_3885736 | 2021-09-02      |
| hCoV-19/Japan/PG-75749/2021 | EPI_ISL_3885738 | 2021-09-02      |
| hCoV-19/Japan/PG-75750/2021 | EPI_ISL_3885740 | 2021-09-02      |
| hCoV-19/Japan/PG-75751/2021 | EPI_ISL_3885743 | 2021-09-02      |
| hCoV-19/Japan/PG-75752/2021 | EPI_ISL_3885744 | 2021-09-02      |
| hCoV-19/Japan/PG-75753/2021 | EPI_ISL_3885747 | 2021-09-02      |
| hCoV-19/Japan/PG-75754/2021 | EPI_ISL_3885749 | 2021-09-02      |
| hCoV-19/Japan/PG-75755/2021 | EPI_ISL_3885751 | 2021-09-02      |
| hCoV-19/Japan/PG-75756/2021 | EPI_ISL_3885754 | 2021-09-02      |
| hCoV-19/Japan/PG-75757/2021 | EPI_ISL_3885756 | 2021-09-02      |
| hCoV-19/Japan/PG-75758/2021 | EPI_ISL_3885758 | 2021-09-02      |
| hCoV-19/Japan/PG-75759/2021 | EPI_ISL_3885760 | 2021-09-02      |

| virus_name                  | epiID           | submission_date |
|-----------------------------|-----------------|-----------------|
| hCoV-19/Japan/PG-75760/2021 | EPI_ISL_3885763 | 2021-09-02      |
| hCoV-19/Japan/PG-75761/2021 | EPI_ISL_3885765 | 2021-09-02      |
| hCoV-19/Japan/PG-75762/2021 | EPI_ISL_3885766 | 2021-09-02      |
| hCoV-19/Japan/PG-75763/2021 | EPI_ISL_3885768 | 2021-09-02      |
| hCoV-19/Japan/PG-75764/2021 | EPI_ISL_3885771 | 2021-09-02      |
| hCoV-19/Japan/PG-75765/2021 | EPI_ISL_3885773 | 2021-09-02      |
| hCoV-19/Japan/PG-75766/2021 | EPI_ISL_3885776 | 2021-09-02      |
| hCoV-19/Japan/PG-75767/2021 | EPI_ISL_3885778 | 2021-09-02      |
| hCoV-19/Japan/PG-75768/2021 | EPI_ISL_3885780 | 2021-09-02      |
| hCoV-19/Japan/PG-75769/2021 | EPI_ISL_3885783 | 2021-09-02      |
| hCoV-19/Japan/PG-75770/2021 | EPI_ISL_3885785 | 2021-09-02      |
| hCoV-19/Japan/PG-75771/2021 | EPI_ISL_3885786 | 2021-09-02      |
| hCoV-19/Japan/PG-75772/2021 | EPI_ISL_3885788 | 2021-09-02      |
| hCoV-19/Japan/PG-75773/2021 | EPI_ISL_3885791 | 2021-09-02      |
| hCoV-19/Japan/PG-75774/2021 | EPI_ISL_3885792 | 2021-09-02      |
| hCoV-19/Japan/PG-75775/2021 | EPI_ISL_3885794 | 2021-09-02      |
| hCoV-19/Japan/PG-75776/2021 | EPI_ISL_3885796 | 2021-09-02      |
| hCoV-19/Japan/PG-75777/2021 | EPI_ISL_3885799 | 2021-09-02      |
| hCoV-19/Japan/PG-75778/2021 | EPI_ISL_3885802 | 2021-09-02      |
| hCoV-19/Japan/PG-75779/2021 | EPI_ISL_3885804 | 2021-09-02      |
| hCoV-19/Japan/PG-75780/2021 | EPI_ISL_3885805 | 2021-09-02      |
| hCoV-19/Japan/PG-75781/2021 | EPI_ISL_3885808 | 2021-09-02      |
| hCoV-19/Japan/PG-75782/2021 | EPI_ISL_3885810 | 2021-09-02      |
| hCoV-19/Japan/PG-75783/2021 | EPI_ISL_3885811 | 2021-09-02      |
| hCoV-19/Japan/PG-75784/2021 | EPI_ISL_3885814 | 2021-09-02      |
| hCoV-19/Japan/PG-75785/2021 | EPI_ISL_3885816 | 2021-09-02      |
| hCoV-19/Japan/PG-75786/2021 | EPI_ISL_3885819 | 2021-09-02      |
| hCoV-19/Japan/PG-75787/2021 | EPI_ISL_3885821 | 2021-09-02      |
| hCoV-19/Japan/PG-75788/2021 | EPI_ISL_3885823 | 2021-09-02      |
| hCoV-19/Japan/PG-75789/2021 | EPI_ISL_3885826 | 2021-09-02      |
| hCoV-19/Japan/PG-75790/2021 | EPI_ISL_3885827 | 2021-09-02      |
| hCoV-19/Japan/PG-75791/2021 | EPI_ISL_3885830 | 2021-09-02      |
| hCoV-19/Japan/PG-75792/2021 | EPI_ISL_3885833 | 2021-09-02      |
| hCoV-19/Japan/PG-75793/2021 | EPI_ISL_3885835 | 2021-09-02      |
| hCoV-19/Japan/PG-75794/2021 | EPI_ISL_3885837 | 2021-09-02      |
| hCoV-19/Japan/PG-75795/2021 | EPI_ISL_3885840 | 2021-09-02      |
| hCoV-19/Japan/PG-75796/2021 | EPI_ISL_3885842 | 2021-09-02      |
| hCoV-19/Japan/PG-75797/2021 | EPI_ISL_3885845 | 2021-09-02      |
| hCoV-19/Japan/PG-75798/2021 | EPI_ISL_3885847 | 2021-09-02      |
| hCoV-19/Japan/PG-75799/2021 | EPI_ISL_3885850 | 2021-09-02      |
| hCoV-19/Japan/PG-75800/2021 | EPI_ISL_3885852 | 2021-09-02      |
| hCoV-19/Japan/PG-75801/2021 | EPI_ISL_3885854 | 2021-09-02      |
| hCoV-19/Japan/PG-75802/2021 | EPI_ISL_3885856 | 2021-09-02      |
| hCoV-19/Japan/PG-75803/2021 | EPI_ISL_3885859 | 2021-09-02      |
| hCoV-19/Japan/PG-75804/2021 | EPI_ISL_3885860 | 2021-09-02      |
| hCoV-19/Japan/PG-75805/2021 | EPI_ISL_3885863 | 2021-09-02      |
| hCoV-19/Japan/PG-75806/2021 | EPI_ISL_3885865 | 2021-09-02      |
| hCoV-19/Japan/PG-75807/2021 | EPI_ISL_3885868 | 2021-09-02      |
| hCoV-19/Japan/PG-75808/2021 | EPI_ISL_3885870 | 2021-09-02      |
| hCoV-19/Japan/PG-75809/2021 | EPI_ISL_3885873 | 2021-09-02      |
| hCoV-19/Japan/PG-75810/2021 | EPI_ISL_3885875 | 2021-09-02      |
| hCoV-19/Japan/PG-75811/2021 | EPI_ISL_3885876 | 2021-09-02      |
| hCoV-19/Japan/PG-75812/2021 | EPI_ISL_3885878 | 2021-09-02      |
| hCoV-19/Japan/PG-75813/2021 | EPI_ISL_3885880 | 2021-09-02      |

| virus_name                  | epiID           | submission_date |
|-----------------------------|-----------------|-----------------|
| hCoV-19/Japan/PG-75814/2021 | EPI_ISL_3885881 | 2021-09-02      |
| hCoV-19/Japan/PG-75815/2021 | EPI_ISL_3885883 | 2021-09-02      |
| hCoV-19/Japan/PG-75816/2021 | EPI_ISL_3885885 | 2021-09-02      |
| hCoV-19/Japan/PG-75817/2021 | EPI_ISL_3885887 | 2021-09-02      |
| hCoV-19/Japan/PG-75818/2021 | EPI_ISL_3885889 | 2021-09-02      |
| hCoV-19/Japan/PG-75819/2021 | EPI_ISL_3885891 | 2021-09-02      |
| hCoV-19/Japan/PG-75820/2021 | EPI_ISL_3885893 | 2021-09-02      |
| hCoV-19/Japan/PG-75821/2021 | EPI_ISL_3885896 | 2021-09-02      |
| hCoV-19/Japan/PG-75822/2021 | EPI_ISL_3885898 | 2021-09-02      |
| hCoV-19/Japan/PG-75823/2021 | EPI_ISL_3885900 | 2021-09-02      |
| hCoV-19/Japan/PG-75824/2021 | EPI_ISL_3885902 | 2021-09-02      |
| hCoV-19/Japan/PG-75825/2021 | EPI_ISL_3885905 | 2021-09-02      |
| hCoV-19/Japan/PG-75826/2021 | EPI_ISL_3885907 | 2021-09-02      |
| hCoV-19/Japan/PG-75827/2021 | EPI_ISL_3885908 | 2021-09-02      |
| hCoV-19/Japan/PG-75828/2021 | EPI_ISL_3885909 | 2021-09-02      |
| hCoV-19/Japan/PG-75829/2021 | EPI_ISL_3885912 | 2021-09-02      |
| hCoV-19/Japan/PG-75830/2021 | EPI_ISL_3885914 | 2021-09-02      |
| hCoV-19/Japan/PG-75831/2021 | EPI_ISL_3885917 | 2021-09-02      |
| hCoV-19/Japan/PG-75832/2021 | EPI_ISL_3885918 | 2021-09-02      |
| hCoV-19/Japan/PG-75833/2021 | EPI_ISL_3885920 | 2021-09-02      |
| hCoV-19/Japan/PG-75834/2021 | EPI_ISL_3885922 | 2021-09-02      |
| hCoV-19/Japan/PG-75835/2021 | EPI_ISL_3885924 | 2021-09-02      |
| hCoV-19/Japan/PG-75836/2021 | EPI_ISL_3885927 | 2021-09-02      |
| hCoV-19/Japan/PG-75837/2021 | EPI_ISL_3885930 | 2021-09-02      |
| hCoV-19/Japan/PG-75838/2021 | EPI_ISL_3885932 | 2021-09-02      |
| hCoV-19/Japan/PG-75839/2021 | EPI_ISL_3885935 | 2021-09-02      |
| hCoV-19/Japan/PG-75840/2021 | EPI_ISL_3885937 | 2021-09-02      |
| hCoV-19/Japan/PG-75841/2021 | EPI_ISL_3885940 | 2021-09-02      |
| hCoV-19/Japan/PG-75842/2021 | EPI_ISL_3885942 | 2021-09-02      |
| hCoV-19/Japan/PG-75843/2021 | EPI_ISL_3885944 | 2021-09-02      |
| hCoV-19/Japan/PG-75844/2021 | EPI_ISL_3885947 | 2021-09-02      |
| hCoV-19/Japan/PG-75845/2021 | EPI_ISL_3885950 | 2021-09-02      |
| hCoV-19/Japan/PG-75846/2021 | EPI_ISL_3885952 | 2021-09-02      |
| hCoV-19/Japan/PG-75847/2021 | EPI_ISL_3885955 | 2021-09-02      |
| hCoV-19/Japan/PG-75848/2021 | EPI_ISL_3885958 | 2021-09-02      |
| hCoV-19/Japan/PG-75849/2021 | EPI_ISL_3885960 | 2021-09-02      |
| hCoV-19/Japan/PG-75850/2021 | EPI_ISL_3885962 | 2021-09-02      |
| hCoV-19/Japan/PG-75851/2021 | EPI_ISL_3885965 | 2021-09-02      |
| hCoV-19/Japan/PG-75852/2021 | EPI_ISL_3885968 | 2021-09-02      |
| hCoV-19/Japan/PG-75853/2021 | EPI_ISL_3885970 | 2021-09-02      |
| hCoV-19/Japan/PG-75854/2021 | EPI_ISL_3885973 | 2021-09-02      |
| hCoV-19/Japan/PG-75855/2021 | EPI_ISL_3885975 | 2021-09-02      |
| hCoV-19/Japan/PG-75856/2021 | EPI_ISL_3885977 | 2021-09-02      |
| hCoV-19/Japan/PG-75857/2021 | EPI_ISL_3885980 | 2021-09-02      |
| hCoV-19/Japan/PG-75858/2021 | EPI_ISL_3885983 | 2021-09-02      |
| hCoV-19/Japan/PG-75859/2021 | EPI_ISL_3885985 | 2021-09-02      |
| hCoV-19/Japan/PG-75860/2021 | EPI_ISL_3885987 | 2021-09-02      |
| hCoV-19/Japan/PG-75861/2021 | EPI_ISL_3885989 | 2021-09-02      |
| hCoV-19/Japan/PG-75862/2021 | EPI_ISL_3885991 | 2021-09-02      |
| hCoV-19/Japan/PG-75863/2021 | EPI_ISL_3885993 | 2021-09-02      |
| hCoV-19/Japan/PG-75864/2021 | EPI_ISL_3885994 | 2021-09-02      |
| hCoV-19/Japan/PG-75865/2021 | EPI_ISL_3885996 | 2021-09-02      |
| hCoV-19/Japan/PG-75866/2021 | EPI_ISL_3885998 | 2021-09-02      |
| hCoV-19/Japan/PG-75867/2021 | EPI_ISL_3886000 | 2021-09-02      |



| virus_name                  | epiID           | submission_date |
|-----------------------------|-----------------|-----------------|
| hCoV-19/Japan/PG-75868/2021 | EPI_ISL_3886003 | 2021-09-02      |
| hCoV-19/Japan/PG-75869/2021 | EPI_ISL_3886005 | 2021-09-02      |
| hCoV-19/Japan/PG-75870/2021 | EPI_ISL_3886007 | 2021-09-02      |
| hCoV-19/Japan/PG-75871/2021 | EPI_ISL_3886009 | 2021-09-02      |
| hCoV-19/Japan/PG-75872/2021 | EPI_ISL_3886012 | 2021-09-02      |
| hCoV-19/Japan/PG-75873/2021 | EPI_ISL_3886014 | 2021-09-02      |
| hCoV-19/Japan/PG-75874/2021 | EPI_ISL_3886017 | 2021-09-02      |
| hCoV-19/Japan/PG-75875/2021 | EPI_ISL_3886019 | 2021-09-02      |
| hCoV-19/Japan/PG-75876/2021 | EPI_ISL_3886021 | 2021-09-02      |
| hCoV-19/Japan/PG-75877/2021 | EPI_ISL_3886024 | 2021-09-02      |
| hCoV-19/Japan/PG-75878/2021 | EPI_ISL_3886026 | 2021-09-02      |
| hCoV-19/Japan/PG-75879/2021 | EPI_ISL_3886028 | 2021-09-02      |
| hCoV-19/Japan/PG-75880/2021 | EPI_ISL_3886030 | 2021-09-02      |
| hCoV-19/Japan/PG-75881/2021 | EPI_ISL_3886032 | 2021-09-02      |
| hCoV-19/Japan/PG-75882/2021 | EPI_ISL_3886035 | 2021-09-02      |
| hCoV-19/Japan/PG-75883/2021 | EPI_ISL_3886037 | 2021-09-02      |
| hCoV-19/Japan/PG-75884/2021 | EPI_ISL_3886040 | 2021-09-02      |
| hCoV-19/Japan/PG-75885/2021 | EPI_ISL_3886042 | 2021-09-02      |
| hCoV-19/Japan/PG-75886/2021 | EPI_ISL_3886045 | 2021-09-02      |
| hCoV-19/Japan/PG-75887/2021 | EPI_ISL_3886047 | 2021-09-02      |
| hCoV-19/Japan/PG-75888/2021 | EPI_ISL_3886049 | 2021-09-02      |
| hCoV-19/Japan/PG-75889/2021 | EPI_ISL_3886052 | 2021-09-02      |
| hCoV-19/Japan/PG-75890/2021 | EPI_ISL_3886055 | 2021-09-02      |
| hCoV-19/Japan/PG-75891/2021 | EPI_ISL_3886057 | 2021-09-02      |
| hCoV-19/Japan/PG-75892/2021 | EPI_ISL_3886060 | 2021-09-02      |
| hCoV-19/Japan/PG-75893/2021 | EPI_ISL_3886062 | 2021-09-02      |
| hCoV-19/Japan/PG-75894/2021 | EPI_ISL_3886064 | 2021-09-02      |
| hCoV-19/Japan/PG-75895/2021 | EPI_ISL_3886066 | 2021-09-02      |
| hCoV-19/Japan/PG-75896/2021 | EPI_ISL_3886067 | 2021-09-02      |
| hCoV-19/Japan/PG-75897/2021 | EPI_ISL_3886069 | 2021-09-02      |
| hCoV-19/Japan/PG-75898/2021 | EPI_ISL_3886071 | 2021-09-02      |
| hCoV-19/Japan/PG-75899/2021 | EPI_ISL_3886074 | 2021-09-02      |
| hCoV-19/Japan/PG-75900/2021 | EPI_ISL_3886077 | 2021-09-02      |
| hCoV-19/Japan/PG-75901/2021 | EPI_ISL_3886079 | 2021-09-02      |
| hCoV-19/Japan/PG-75902/2021 | EPI_ISL_3886080 | 2021-09-02      |
| hCoV-19/Japan/PG-75903/2021 | EPI_ISL_3886083 | 2021-09-02      |
| hCoV-19/Japan/PG-75904/2021 | EPI_ISL_3886084 | 2021-09-02      |
| hCoV-19/Japan/PG-75905/2021 | EPI_ISL_3886087 | 2021-09-02      |
| hCoV-19/Japan/PG-75906/2021 | EPI_ISL_3886088 | 2021-09-02      |
| hCoV-19/Japan/PG-75907/2021 | EPI_ISL_3886091 | 2021-09-02      |
| hCoV-19/Japan/PG-75908/2021 | EPI_ISL_3886092 | 2021-09-02      |
| hCoV-19/Japan/PG-75909/2021 | EPI_ISL_3886094 | 2021-09-02      |
| hCoV-19/Japan/PG-75910/2021 | EPI_ISL_3886096 | 2021-09-02      |
| hCoV-19/Japan/PG-75911/2021 | EPI_ISL_3886098 | 2021-09-02      |
| hCoV-19/Japan/PG-75912/2021 | EPI_ISL_3886100 | 2021-09-02      |
| hCoV-19/Japan/PG-75913/2021 | EPI_ISL_3886102 | 2021-09-02      |
| hCoV-19/Japan/PG-75914/2021 | EPI_ISL_3886104 | 2021-09-02      |
| hCoV-19/Japan/PG-75915/2021 | EPI_ISL_3886106 | 2021-09-02      |
| hCoV-19/Japan/PG-75916/2021 | EPI_ISL_3886108 | 2021-09-02      |
| hCoV-19/Japan/PG-75917/2021 | EPI_ISL_3886111 | 2021-09-02      |
| hCoV-19/Japan/PG-75918/2021 | EPI_ISL_3886112 | 2021-09-02      |
| hCoV-19/Japan/PG-75919/2021 | EPI_ISL_3886115 | 2021-09-02      |
| hCoV-19/Japan/PG-75920/2021 | EPI_ISL_3886117 | 2021-09-02      |
| hCoV-19/Japan/PG-75921/2021 | EPI_ISL_3886120 | 2021-09-02      |

| virus_name                  | epiID           | submission_date |
|-----------------------------|-----------------|-----------------|
| hCoV-19/Japan/PG-75922/2021 | EPI_ISL_3886122 | 2021-09-02      |
| hCoV-19/Japan/PG-75923/2021 | EPI_ISL_3886125 | 2021-09-02      |
| hCoV-19/Japan/PG-75924/2021 | EPI_ISL_3886127 | 2021-09-02      |
| hCoV-19/Japan/PG-75925/2021 | EPI_ISL_3886129 | 2021-09-02      |
| hCoV-19/Japan/PG-75926/2021 | EPI_ISL_3886132 | 2021-09-02      |
| hCoV-19/Japan/PG-75927/2021 | EPI_ISL_3886134 | 2021-09-02      |
| hCoV-19/Japan/PG-75928/2021 | EPI_ISL_3886136 | 2021-09-02      |
| hCoV-19/Japan/PG-75929/2021 | EPI_ISL_3886138 | 2021-09-02      |
| hCoV-19/Japan/PG-75930/2021 | EPI_ISL_3886140 | 2021-09-02      |
| hCoV-19/Japan/PG-75931/2021 | EPI_ISL_3886143 | 2021-09-02      |
| hCoV-19/Japan/PG-75932/2021 | EPI_ISL_3886145 | 2021-09-02      |
| hCoV-19/Japan/PG-75933/2021 | EPI_ISL_3886146 | 2021-09-02      |
| hCoV-19/Japan/PG-75934/2021 | EPI_ISL_3886147 | 2021-09-02      |
| hCoV-19/Japan/PG-75935/2021 | EPI_ISL_3886149 | 2021-09-02      |
| hCoV-19/Japan/PG-75936/2021 | EPI_ISL_3886151 | 2021-09-02      |
| hCoV-19/Japan/PG-75937/2021 | EPI_ISL_3886153 | 2021-09-02      |
| hCoV-19/Japan/PG-75938/2021 | EPI_ISL_3886154 | 2021-09-02      |
| hCoV-19/Japan/PG-75939/2021 | EPI_ISL_3886157 | 2021-09-02      |
| hCoV-19/Japan/PG-75940/2021 | EPI_ISL_3886159 | 2021-09-02      |
| hCoV-19/Japan/PG-75941/2021 | EPI_ISL_3886162 | 2021-09-02      |
| hCoV-19/Japan/PG-75942/2021 | EPI_ISL_3886164 | 2021-09-02      |
| hCoV-19/Japan/PG-75943/2021 | EPI_ISL_3886167 | 2021-09-02      |
| hCoV-19/Japan/PG-75944/2021 | EPI_ISL_3886168 | 2021-09-02      |
| hCoV-19/Japan/PG-75945/2021 | EPI_ISL_3886170 | 2021-09-02      |
| hCoV-19/Japan/PG-75946/2021 | EPI_ISL_3886171 | 2021-09-02      |
| hCoV-19/Japan/PG-75947/2021 | EPI_ISL_3886173 | 2021-09-02      |
| hCoV-19/Japan/PG-75948/2021 | EPI_ISL_3886176 | 2021-09-02      |
| hCoV-19/Japan/PG-75949/2021 | EPI_ISL_3886178 | 2021-09-02      |
| hCoV-19/Japan/PG-75950/2021 | EPI_ISL_3886180 | 2021-09-02      |
| hCoV-19/Japan/PG-75951/2021 | EPI_ISL_3886183 | 2021-09-02      |
| hCoV-19/Japan/PG-75952/2021 | EPI_ISL_3886185 | 2021-09-02      |
| hCoV-19/Japan/PG-75953/2021 | EPI_ISL_3886187 | 2021-09-02      |
| hCoV-19/Japan/PG-75954/2021 | EPI_ISL_3886190 | 2021-09-02      |
| hCoV-19/Japan/PG-75955/2021 | EPI_ISL_3886192 | 2021-09-02      |
| hCoV-19/Japan/PG-75956/2021 | EPI_ISL_3886195 | 2021-09-02      |
| hCoV-19/Japan/PG-75957/2021 | EPI_ISL_3886197 | 2021-09-02      |
| hCoV-19/Japan/PG-75958/2021 | EPI_ISL_3886200 | 2021-09-02      |
| hCoV-19/Japan/PG-75959/2021 | EPI_ISL_3886202 | 2021-09-02      |
| hCoV-19/Japan/PG-75960/2021 | EPI_ISL_3886204 | 2021-09-02      |
| hCoV-19/Japan/PG-75961/2021 | EPI_ISL_3886206 | 2021-09-02      |
| hCoV-19/Japan/PG-75962/2021 | EPI_ISL_3886209 | 2021-09-02      |
| hCoV-19/Japan/PG-75963/2021 | EPI_ISL_3886211 | 2021-09-02      |
| hCoV-19/Japan/PG-75964/2021 | EPI_ISL_3886214 | 2021-09-02      |
| hCoV-19/Japan/PG-75965/2021 | EPI_ISL_3886216 | 2021-09-02      |
| hCoV-19/Japan/PG-75966/2021 | EPI_ISL_3886218 | 2021-09-02      |
| hCoV-19/Japan/PG-75967/2021 | EPI_ISL_3886219 | 2021-09-02      |
| hCoV-19/Japan/PG-75968/2021 | EPI_ISL_3886222 | 2021-09-02      |
| hCoV-19/Japan/PG-75969/2021 | EPI_ISL_3886223 | 2021-09-02      |
| hCoV-19/Japan/PG-75970/2021 | EPI_ISL_3886226 | 2021-09-02      |
| hCoV-19/Japan/PG-75971/2021 | EPI_ISL_3886228 | 2021-09-02      |
| hCoV-19/Japan/PG-75972/2021 | EPI_ISL_3886234 | 2021-09-02      |
| hCoV-19/Japan/PG-75973/2021 | EPI_ISL_3886236 | 2021-09-02      |
| hCoV-19/Japan/PG-75974/2021 | EPI_ISL_3886238 | 2021-09-02      |
| hCoV-19/Japan/PG-75975/2021 | EPI_ISL_3886240 | 2021-09-02      |

| virus_name                  | epiID           | submission_date |
|-----------------------------|-----------------|-----------------|
| hCoV-19/Japan/PG-75976/2021 | EPI_ISL_3886242 | 2021-09-02      |
| hCoV-19/Japan/PG-75977/2021 | EPI_ISL_3886244 | 2021-09-02      |
| hCoV-19/Japan/PG-75978/2021 | EPI_ISL_3886246 | 2021-09-02      |
| hCoV-19/Japan/PG-75979/2021 | EPI_ISL_3886248 | 2021-09-02      |
| hCoV-19/Japan/PG-75980/2021 | EPI_ISL_3886249 | 2021-09-02      |
| hCoV-19/Japan/PG-75981/2021 | EPI_ISL_3886252 | 2021-09-02      |
| hCoV-19/Japan/PG-75982/2021 | EPI_ISL_3886254 | 2021-09-02      |
| hCoV-19/Japan/PG-75983/2021 | EPI_ISL_3886256 | 2021-09-02      |
| hCoV-19/Japan/PG-75984/2021 | EPI_ISL_3886258 | 2021-09-02      |
| hCoV-19/Japan/PG-75985/2021 | EPI_ISL_3886261 | 2021-09-02      |
| hCoV-19/Japan/PG-75986/2021 | EPI_ISL_3886263 | 2021-09-02      |
| hCoV-19/Japan/PG-75987/2021 | EPI_ISL_3886264 | 2021-09-02      |
| hCoV-19/Japan/PG-75988/2021 | EPI_ISL_3886266 | 2021-09-02      |
| hCoV-19/Japan/PG-75989/2021 | EPI_ISL_3886268 | 2021-09-02      |
| hCoV-19/Japan/PG-75990/2021 | EPI_ISL_3886270 | 2021-09-02      |
| hCoV-19/Japan/PG-75991/2021 | EPI_ISL_3886272 | 2021-09-02      |
| hCoV-19/Japan/PG-75992/2021 | EPI_ISL_3886274 | 2021-09-02      |
| hCoV-19/Japan/PG-75993/2021 | EPI_ISL_3886276 | 2021-09-02      |
| hCoV-19/Japan/PG-75994/2021 | EPI_ISL_3886278 | 2021-09-02      |
| hCoV-19/Japan/PG-75995/2021 | EPI_ISL_3886280 | 2021-09-02      |
| hCoV-19/Japan/PG-75996/2021 | EPI_ISL_3886282 | 2021-09-02      |
| hCoV-19/Japan/PG-75997/2021 | EPI_ISL_3886283 | 2021-09-02      |
| hCoV-19/Japan/PG-75998/2021 | EPI_ISL_3886286 | 2021-09-02      |
| hCoV-19/Japan/PG-75999/2021 | EPI_ISL_3886287 | 2021-09-02      |
| hCoV-19/Japan/PG-76000/2021 | EPI_ISL_3886289 | 2021-09-02      |
| hCoV-19/Japan/PG-76001/2021 | EPI_ISL_3886291 | 2021-09-02      |
| hCoV-19/Japan/PG-76002/2021 | EPI_ISL_3886293 | 2021-09-02      |
| hCoV-19/Japan/PG-76003/2021 | EPI_ISL_3886296 | 2021-09-02      |
| hCoV-19/Japan/PG-76004/2021 | EPI_ISL_3886299 | 2021-09-02      |
| hCoV-19/Japan/PG-76005/2021 | EPI_ISL_3886302 | 2021-09-02      |
| hCoV-19/Japan/PG-76006/2021 | EPI_ISL_3886304 | 2021-09-02      |
| hCoV-19/Japan/PG-76007/2021 | EPI_ISL_3886307 | 2021-09-02      |
| hCoV-19/Japan/PG-76008/2021 | EPI_ISL_3886309 | 2021-09-02      |
| hCoV-19/Japan/PG-76009/2021 | EPI_ISL_3886311 | 2021-09-02      |
| hCoV-19/Japan/PG-76010/2021 | EPI_ISL_3886313 | 2021-09-02      |
| hCoV-19/Japan/PG-76011/2021 | EPI_ISL_3886315 | 2021-09-02      |
| hCoV-19/Japan/PG-76012/2021 | EPI_ISL_3886318 | 2021-09-02      |
| hCoV-19/Japan/PG-76013/2021 | EPI_ISL_3886319 | 2021-09-02      |
| hCoV-19/Japan/PG-76014/2021 | EPI_ISL_3886320 | 2021-09-02      |
| hCoV-19/Japan/PG-76015/2021 | EPI_ISL_3886322 | 2021-09-02      |
| hCoV-19/Japan/PG-76016/2021 | EPI_ISL_3886324 | 2021-09-02      |
| hCoV-19/Japan/PG-76017/2021 | EPI_ISL_3886326 | 2021-09-02      |
| hCoV-19/Japan/PG-76018/2021 | EPI_ISL_3886328 | 2021-09-02      |
| hCoV-19/Japan/PG-76019/2021 | EPI_ISL_3886330 | 2021-09-02      |
| hCoV-19/Japan/PG-76020/2021 | EPI_ISL_3886332 | 2021-09-02      |
| hCoV-19/Japan/PG-76021/2021 | EPI_ISL_3886334 | 2021-09-02      |
| hCoV-19/Japan/PG-76022/2021 | EPI_ISL_3886336 | 2021-09-02      |
| hCoV-19/Japan/PG-76023/2021 | EPI_ISL_3886338 | 2021-09-02      |
| hCoV-19/Japan/PG-76024/2021 | EPI_ISL_3886340 | 2021-09-02      |
| hCoV-19/Japan/PG-76025/2021 | EPI_ISL_3886343 | 2021-09-02      |
| hCoV-19/Japan/PG-76026/2021 | EPI_ISL_3886345 | 2021-09-02      |
| hCoV-19/Japan/PG-76027/2021 | EPI_ISL_3886348 | 2021-09-02      |
| hCoV-19/Japan/PG-76028/2021 | EPI_ISL_3886349 | 2021-09-02      |
| hCoV-19/Japan/PG-76029/2021 | EPI_ISL_3886352 | 2021-09-02      |

| virus_name                  | epiID           | submission_date |
|-----------------------------|-----------------|-----------------|
| hCoV-19/Japan/PG-76030/2021 | EPI_ISL_3886353 | 2021-09-02      |
| hCoV-19/Japan/PG-76031/2021 | EPI_ISL_3886354 | 2021-09-02      |
| hCoV-19/Japan/PG-76032/2021 | EPI_ISL_3886355 | 2021-09-02      |
| hCoV-19/Japan/PG-76033/2021 | EPI_ISL_3886356 | 2021-09-02      |
| hCoV-19/Japan/PG-76034/2021 | EPI_ISL_3886357 | 2021-09-02      |
| hCoV-19/Japan/PG-76035/2021 | EPI_ISL_3886358 | 2021-09-02      |
| hCoV-19/Japan/PG-76036/2021 | EPI_ISL_3886361 | 2021-09-02      |
| hCoV-19/Japan/PG-76037/2021 | EPI_ISL_3886363 | 2021-09-02      |
| hCoV-19/Japan/PG-76038/2021 | EPI_ISL_3886365 | 2021-09-02      |
| hCoV-19/Japan/PG-76039/2021 | EPI_ISL_3886368 | 2021-09-02      |
| hCoV-19/Japan/PG-76040/2021 | EPI_ISL_3886370 | 2021-09-02      |
| hCoV-19/Japan/PG-76041/2021 | EPI_ISL_3886372 | 2021-09-02      |
| hCoV-19/Japan/PG-76042/2021 | EPI_ISL_3886375 | 2021-09-02      |
| hCoV-19/Japan/PG-76043/2021 | EPI_ISL_3886377 | 2021-09-02      |
| hCoV-19/Japan/PG-76044/2021 | EPI_ISL_3886380 | 2021-09-02      |
| hCoV-19/Japan/PG-76045/2021 | EPI_ISL_3886382 | 2021-09-02      |
| hCoV-19/Japan/PG-76046/2021 | EPI_ISL_3886385 | 2021-09-02      |
| hCoV-19/Japan/PG-76047/2021 | EPI_ISL_3886387 | 2021-09-02      |
| hCoV-19/Japan/PG-76048/2021 | EPI_ISL_3886389 | 2021-09-02      |
| hCoV-19/Japan/PG-76049/2021 | EPI_ISL_3886391 | 2021-09-02      |
| hCoV-19/Japan/PG-76050/2021 | EPI_ISL_3886394 | 2021-09-02      |
| hCoV-19/Japan/PG-76051/2021 | EPI_ISL_3886396 | 2021-09-02      |
| hCoV-19/Japan/PG-76052/2021 | EPI_ISL_3886398 | 2021-09-02      |
| hCoV-19/Japan/PG-76053/2021 | EPI_ISL_3886400 | 2021-09-02      |
| hCoV-19/Japan/PG-76054/2021 | EPI_ISL_3886402 | 2021-09-02      |
| hCoV-19/Japan/PG-76055/2021 | EPI_ISL_3886404 | 2021-09-02      |
| hCoV-19/Japan/PG-76056/2021 | EPI_ISL_3886407 | 2021-09-02      |
| hCoV-19/Japan/PG-76057/2021 | EPI_ISL_3886409 | 2021-09-02      |
| hCoV-19/Japan/PG-76058/2021 | EPI_ISL_3886411 | 2021-09-02      |
| hCoV-19/Japan/PG-76059/2021 | EPI_ISL_3886412 | 2021-09-02      |
| hCoV-19/Japan/PG-76060/2021 | EPI_ISL_3886414 | 2021-09-02      |
| hCoV-19/Japan/PG-76061/2021 | EPI_ISL_3886416 | 2021-09-02      |
| hCoV-19/Japan/PG-76062/2021 | EPI_ISL_3886418 | 2021-09-02      |
| hCoV-19/Japan/PG-76063/2021 | EPI_ISL_3886419 | 2021-09-02      |
| hCoV-19/Japan/PG-76064/2021 | EPI_ISL_3886420 | 2021-09-02      |
| hCoV-19/Japan/PG-76065/2021 | EPI_ISL_3886422 | 2021-09-02      |
| hCoV-19/Japan/PG-76066/2021 | EPI_ISL_3886424 | 2021-09-02      |
| hCoV-19/Japan/PG-76067/2021 | EPI_ISL_3886426 | 2021-09-02      |
| hCoV-19/Japan/PG-76068/2021 | EPI_ISL_3886428 | 2021-09-02      |
| hCoV-19/Japan/PG-76069/2021 | EPI_ISL_3886431 | 2021-09-02      |
| hCoV-19/Japan/PG-76070/2021 | EPI_ISL_3886433 | 2021-09-02      |
| hCoV-19/Japan/PG-76071/2021 | EPI_ISL_3886436 | 2021-09-02      |
| hCoV-19/Japan/PG-76072/2021 | EPI_ISL_3886437 | 2021-09-02      |
| hCoV-19/Japan/PG-76073/2021 | EPI_ISL_3886439 | 2021-09-02      |
| hCoV-19/Japan/PG-76074/2021 | EPI_ISL_3886440 | 2021-09-02      |
| hCoV-19/Japan/PG-76075/2021 | EPI_ISL_3886442 | 2021-09-02      |
| hCoV-19/Japan/PG-76076/2021 | EPI_ISL_3886444 | 2021-09-02      |
| hCoV-19/Japan/PG-76077/2021 | EPI_ISL_3886446 | 2021-09-02      |
| hCoV-19/Japan/PG-76078/2021 | EPI_ISL_3886448 | 2021-09-02      |
| hCoV-19/Japan/PG-76079/2021 | EPI_ISL_3886450 | 2021-09-02      |
| hCoV-19/Japan/PG-76080/2021 | EPI_ISL_3886451 | 2021-09-02      |
| hCoV-19/Japan/PG-76081/2021 | EPI_ISL_3873680 | 2021-09-02      |
| hCoV-19/Japan/PG-76082/2021 | EPI_ISL_3873681 | 2021-09-02      |
| hCoV-19/Japan/PG-76083/2021 | EPI_ISL_3873682 | 2021-09-02      |

| virus_name                  | epiID           | submission_date |
|-----------------------------|-----------------|-----------------|
| hCoV-19/Japan/PG-76084/2021 | EPI_ISL_3873683 | 2021-09-02      |
| hCoV-19/Japan/PG-76085/2021 | EPI_ISL_3873684 | 2021-09-02      |
| hCoV-19/Japan/PG-76086/2021 | EPI_ISL_3873685 | 2021-09-02      |
| hCoV-19/Japan/PG-76087/2021 | EPI_ISL_3873686 | 2021-09-02      |
| hCoV-19/Japan/PG-76088/2021 | EPI_ISL_3873687 | 2021-09-02      |
| hCoV-19/Japan/PG-76089/2021 | EPI_ISL_3873688 | 2021-09-02      |
| hCoV-19/Japan/PG-76090/2021 | EPI_ISL_3873689 | 2021-09-02      |
| hCoV-19/Japan/PG-76091/2021 | EPI_ISL_3873690 | 2021-09-02      |
| hCoV-19/Japan/PG-76092/2021 | EPI_ISL_3873691 | 2021-09-02      |
| hCoV-19/Japan/PG-76093/2021 | EPI_ISL_3873692 | 2021-09-02      |
| hCoV-19/Japan/PG-76094/2021 | EPI_ISL_3873693 | 2021-09-02      |
| hCoV-19/Japan/PG-76095/2021 | EPI_ISL_3873694 | 2021-09-02      |
| hCoV-19/Japan/PG-76096/2021 | EPI_ISL_3873695 | 2021-09-02      |
| hCoV-19/Japan/PG-76097/2021 | EPI_ISL_3873696 | 2021-09-02      |
| hCoV-19/Japan/PG-76098/2021 | EPI_ISL_3873697 | 2021-09-02      |
| hCoV-19/Japan/PG-76099/2021 | EPI_ISL_3873698 | 2021-09-02      |
| hCoV-19/Japan/PG-76100/2021 | EPI_ISL_3873699 | 2021-09-02      |
| hCoV-19/Japan/PG-76101/2021 | EPI_ISL_3873700 | 2021-09-02      |
| hCoV-19/Japan/PG-76102/2021 | EPI_ISL_3873701 | 2021-09-02      |
| hCoV-19/Japan/PG-76103/2021 | EPI_ISL_3873702 | 2021-09-02      |
| hCoV-19/Japan/PG-76104/2021 | EPI_ISL_3873703 | 2021-09-02      |
| hCoV-19/Japan/PG-76105/2021 | EPI_ISL_3873704 | 2021-09-02      |
| hCoV-19/Japan/PG-76106/2021 | EPI_ISL_3873705 | 2021-09-02      |
| hCoV-19/Japan/PG-76107/2021 | EPI_ISL_3873706 | 2021-09-02      |
| hCoV-19/Japan/PG-76108/2021 | EPI_ISL_3873707 | 2021-09-02      |
| hCoV-19/Japan/PG-76109/2021 | EPI_ISL_3873708 | 2021-09-02      |
| hCoV-19/Japan/PG-76110/2021 | EPI_ISL_3873709 | 2021-09-02      |
| hCoV-19/Japan/PG-76111/2021 | EPI_ISL_3873710 | 2021-09-02      |
| hCoV-19/Japan/PG-76112/2021 | EPI_ISL_3873711 | 2021-09-02      |
| hCoV-19/Japan/PG-76113/2021 | EPI_ISL_3873712 | 2021-09-02      |
| hCoV-19/Japan/PG-76114/2021 | EPI_ISL_3873713 | 2021-09-02      |
| hCoV-19/Japan/PG-76115/2021 | EPI_ISL_3873714 | 2021-09-02      |
| hCoV-19/Japan/PG-76116/2021 | EPI_ISL_3873715 | 2021-09-02      |
| hCoV-19/Japan/PG-76117/2021 | EPI_ISL_3873716 | 2021-09-02      |
| hCoV-19/Japan/PG-76118/2021 | EPI_ISL_3873717 | 2021-09-02      |
| hCoV-19/Japan/PG-76119/2021 | EPI_ISL_3873718 | 2021-09-02      |
| hCoV-19/Japan/PG-76120/2021 | EPI_ISL_3873719 | 2021-09-02      |
| hCoV-19/Japan/PG-76121/2021 | EPI_ISL_3873720 | 2021-09-02      |
| hCoV-19/Japan/PG-76122/2021 | EPI_ISL_3873721 | 2021-09-02      |
| hCoV-19/Japan/PG-76123/2021 | EPI_ISL_3873722 | 2021-09-02      |
| hCoV-19/Japan/PG-76124/2021 | EPI_ISL_3873723 | 2021-09-02      |
| hCoV-19/Japan/PG-76125/2021 | EPI_ISL_3870503 | 2021-09-02      |
| hCoV-19/Japan/PG-76126/2021 | EPI_ISL_3870504 | 2021-09-02      |
| hCoV-19/Japan/PG-76127/2021 | EPI_ISL_3870505 | 2021-09-02      |
| hCoV-19/Japan/PG-76128/2021 | EPI_ISL_3870506 | 2021-09-02      |
| hCoV-19/Japan/PG-76129/2021 | EPI_ISL_3870507 | 2021-09-02      |
| hCoV-19/Japan/PG-76130/2021 | EPI_ISL_3870508 | 2021-09-02      |
| hCoV-19/Japan/PG-76131/2021 | EPI_ISL_3870509 | 2021-09-02      |
| hCoV-19/Japan/PG-76132/2021 | EPI_ISL_3870510 | 2021-09-02      |
| hCoV-19/Japan/PG-76133/2021 | EPI_ISL_3870511 | 2021-09-02      |
| hCoV-19/Japan/PG-76134/2021 | EPI_ISL_3870512 | 2021-09-02      |
| hCoV-19/Japan/PG-76135/2021 | EPI_ISL_3870513 | 2021-09-02      |
| hCoV-19/Japan/PG-76136/2021 | EPI_ISL_3870514 | 2021-09-02      |
| hCoV-19/Japan/PG-76137/2021 | EPI_ISL_3870515 | 2021-09-02      |

| virus_name                  | epiID           | submission_date |
|-----------------------------|-----------------|-----------------|
| hCoV-19/Japan/PG-76138/2021 | EPI_ISL_3870516 | 2021-09-02      |
| hCoV-19/Japan/PG-76139/2021 | EPI_ISL_3870517 | 2021-09-02      |
| hCoV-19/Japan/PG-76140/2021 | EPI_ISL_3870518 | 2021-09-02      |
| hCoV-19/Japan/PG-76141/2021 | EPI_ISL_3870519 | 2021-09-02      |
| hCoV-19/Japan/PG-76142/2021 | EPI_ISL_3870520 | 2021-09-02      |
| hCoV-19/Japan/PG-76143/2021 | EPI_ISL_3870521 | 2021-09-02      |
| hCoV-19/Japan/PG-76144/2021 | EPI_ISL_3870522 | 2021-09-02      |
| hCoV-19/Japan/PG-76145/2021 | EPI_ISL_3870523 | 2021-09-02      |
| hCoV-19/Japan/PG-76146/2021 | EPI_ISL_3870524 | 2021-09-02      |
| hCoV-19/Japan/PG-76147/2021 | EPI_ISL_3870525 | 2021-09-02      |
| hCoV-19/Japan/PG-76148/2021 | EPI_ISL_3870526 | 2021-09-02      |
| hCoV-19/Japan/PG-76149/2021 | EPI_ISL_3874871 | 2021-09-02      |
| hCoV-19/Japan/PG-76150/2021 | EPI_ISL_3874872 | 2021-09-02      |
| hCoV-19/Japan/PG-76151/2021 | EPI_ISL_3874873 | 2021-09-02      |
| hCoV-19/Japan/PG-76152/2021 | EPI_ISL_3874874 | 2021-09-02      |
| hCoV-19/Japan/PG-76153/2021 | EPI_ISL_3874875 | 2021-09-02      |
| hCoV-19/Japan/PG-76155/2021 | EPI_ISL_3874876 | 2021-09-02      |
| hCoV-19/Japan/PG-76156/2021 | EPI_ISL_3874877 | 2021-09-02      |
| hCoV-19/Japan/PG-76157/2021 | EPI_ISL_3874878 | 2021-09-02      |
| hCoV-19/Japan/PG-76158/2021 | EPI_ISL_3874879 | 2021-09-02      |
| hCoV-19/Japan/PG-76159/2021 | EPI_ISL_3874880 | 2021-09-02      |
| hCoV-19/Japan/PG-76160/2021 | EPI_ISL_3874881 | 2021-09-02      |
| hCoV-19/Japan/PG-76161/2021 | EPI_ISL_3874882 | 2021-09-02      |
| hCoV-19/Japan/PG-76162/2021 | EPI_ISL_3874883 | 2021-09-02      |
| hCoV-19/Japan/PG-76163/2021 | EPI_ISL_3874884 | 2021-09-02      |
| hCoV-19/Japan/PG-76164/2021 | EPI_ISL_3874885 | 2021-09-02      |
| hCoV-19/Japan/PG-76165/2021 | EPI_ISL_3874886 | 2021-09-02      |
| hCoV-19/Japan/PG-76166/2021 | EPI_ISL_3874887 | 2021-09-02      |
| hCoV-19/Japan/PG-76167/2021 | EPI_ISL_3874888 | 2021-09-02      |
| hCoV-19/Japan/PG-76168/2021 | EPI_ISL_3874889 | 2021-09-02      |
| hCoV-19/Japan/PG-76169/2021 | EPI_ISL_3874890 | 2021-09-02      |
| hCoV-19/Japan/PG-76170/2021 | EPI_ISL_3874891 | 2021-09-02      |
| hCoV-19/Japan/PG-76171/2021 | EPI_ISL_3874892 | 2021-09-02      |
| hCoV-19/Japan/PG-76172/2021 | EPI_ISL_3874893 | 2021-09-02      |
| hCoV-19/Japan/PG-76173/2021 | EPI_ISL_3874894 | 2021-09-02      |
| hCoV-19/Japan/PG-76174/2021 | EPI_ISL_3874895 | 2021-09-02      |
| hCoV-19/Japan/PG-76175/2021 | EPI_ISL_3874896 | 2021-09-02      |
| hCoV-19/Japan/PG-76176/2021 | EPI_ISL_3874897 | 2021-09-02      |
| hCoV-19/Japan/PG-76177/2021 | EPI_ISL_3874898 | 2021-09-02      |
| hCoV-19/Japan/PG-76178/2021 | EPI_ISL_3874899 | 2021-09-02      |
| hCoV-19/Japan/PG-76179/2021 | EPI_ISL_3874900 | 2021-09-02      |
| hCoV-19/Japan/PG-76180/2021 | EPI_ISL_3874901 | 2021-09-02      |
| hCoV-19/Japan/PG-76181/2021 | EPI_ISL_3874902 | 2021-09-02      |
| hCoV-19/Japan/PG-76182/2021 | EPI_ISL_3874903 | 2021-09-02      |
| hCoV-19/Japan/PG-76183/2021 | EPI_ISL_3874904 | 2021-09-02      |
| hCoV-19/Japan/PG-76184/2021 | EPI_ISL_3874905 | 2021-09-02      |
| hCoV-19/Japan/PG-76185/2021 | EPI_ISL_3874906 | 2021-09-02      |
| hCoV-19/Japan/PG-76186/2021 | EPI_ISL_3874907 | 2021-09-02      |
| hCoV-19/Japan/PG-76187/2021 | EPI_ISL_3874908 | 2021-09-02      |
| hCoV-19/Japan/PG-76188/2021 | EPI_ISL_3874909 | 2021-09-02      |
| hCoV-19/Japan/PG-76189/2021 | EPI_ISL_3874910 | 2021-09-02      |
| hCoV-19/Japan/PG-76190/2021 | EPI_ISL_3874911 | 2021-09-02      |
| hCoV-19/Japan/PG-76191/2021 | EPI_ISL_3874912 | 2021-09-02      |
| hCoV-19/Japan/PG-76192/2021 | EPI_ISL_3874913 | 2021-09-02      |

| virus_name                  | epiID           | submission_date |
|-----------------------------|-----------------|-----------------|
| hCoV-19/Japan/PG-76193/2021 | EPI_ISL_3874914 | 2021-09-02      |
| hCoV-19/Japan/PG-76194/2021 | EPI_ISL_3874915 | 2021-09-02      |
| hCoV-19/Japan/PG-76195/2021 | EPI_ISL_3874916 | 2021-09-02      |
| hCoV-19/Japan/PG-76196/2021 | EPI_ISL_3874917 | 2021-09-02      |
| hCoV-19/Japan/PG-76197/2021 | EPI_ISL_3874918 | 2021-09-02      |
| hCoV-19/Japan/PG-76198/2021 | EPI_ISL_3874919 | 2021-09-02      |
| hCoV-19/Japan/PG-76199/2021 | EPI_ISL_3874920 | 2021-09-02      |
| hCoV-19/Japan/PG-76200/2021 | EPI_ISL_3874921 | 2021-09-02      |
| hCoV-19/Japan/PG-76201/2021 | EPI_ISL_3874922 | 2021-09-02      |
| hCoV-19/Japan/PG-76202/2021 | EPI_ISL_3874923 | 2021-09-02      |
| hCoV-19/Japan/PG-76203/2021 | EPI_ISL_3874924 | 2021-09-02      |
| hCoV-19/Japan/PG-76204/2021 | EPI_ISL_3874925 | 2021-09-02      |
| hCoV-19/Japan/PG-76205/2021 | EPI_ISL_3874926 | 2021-09-02      |
| hCoV-19/Japan/PG-76206/2021 | EPI_ISL_3874927 | 2021-09-02      |
| hCoV-19/Japan/PG-76207/2021 | EPI_ISL_3874928 | 2021-09-02      |
| hCoV-19/Japan/PG-76208/2021 | EPI_ISL_3874929 | 2021-09-02      |
| hCoV-19/Japan/PG-76209/2021 | EPI_ISL_3874930 | 2021-09-02      |
| hCoV-19/Japan/PG-76210/2021 | EPI_ISL_3874931 | 2021-09-02      |
| hCoV-19/Japan/PG-76211/2021 | EPI_ISL_3874932 | 2021-09-02      |
| hCoV-19/Japan/PG-76212/2021 | EPI_ISL_3874933 | 2021-09-02      |
| hCoV-19/Japan/PG-76213/2021 | EPI_ISL_3874934 | 2021-09-02      |
| hCoV-19/Japan/PG-76214/2021 | EPI_ISL_3874935 | 2021-09-02      |
| hCoV-19/Japan/PG-76215/2021 | EPI_ISL_3874936 | 2021-09-02      |
| hCoV-19/Japan/PG-76216/2021 | EPI_ISL_3874937 | 2021-09-02      |
| hCoV-19/Japan/PG-76217/2021 | EPI_ISL_3874938 | 2021-09-02      |
| hCoV-19/Japan/PG-76218/2021 | EPI_ISL_3874939 | 2021-09-02      |
| hCoV-19/Japan/PG-76219/2021 | EPI_ISL_3874940 | 2021-09-02      |
| hCoV-19/Japan/PG-76220/2021 | EPI_ISL_3874941 | 2021-09-02      |
| hCoV-19/Japan/PG-76221/2021 | EPI_ISL_3874942 | 2021-09-02      |
| hCoV-19/Japan/PG-76222/2021 | EPI_ISL_3874943 | 2021-09-02      |
| hCoV-19/Japan/PG-76223/2021 | EPI_ISL_3874944 | 2021-09-02      |
| hCoV-19/Japan/PG-76224/2021 | EPI_ISL_3874945 | 2021-09-02      |
| hCoV-19/Japan/PG-76225/2021 | EPI_ISL_3874946 | 2021-09-02      |
| hCoV-19/Japan/PG-76226/2021 | EPI_ISL_3874947 | 2021-09-02      |
| hCoV-19/Japan/PG-76227/2021 | EPI_ISL_3874948 | 2021-09-02      |
| hCoV-19/Japan/PG-76228/2021 | EPI_ISL_3874949 | 2021-09-02      |
| hCoV-19/Japan/PG-76229/2021 | EPI_ISL_3874950 | 2021-09-02      |
| hCoV-19/Japan/PG-76230/2021 | EPI_ISL_3874951 | 2021-09-02      |
| hCoV-19/Japan/PG-76231/2021 | EPI_ISL_3874952 | 2021-09-02      |
| hCoV-19/Japan/PG-76232/2021 | EPI_ISL_3874953 | 2021-09-02      |
| hCoV-19/Japan/PG-76233/2021 | EPI_ISL_3874954 | 2021-09-02      |
| hCoV-19/Japan/PG-76234/2021 | EPI_ISL_3874955 | 2021-09-02      |
| hCoV-19/Japan/PG-76235/2021 | EPI_ISL_3874956 | 2021-09-02      |
| hCoV-19/Japan/PG-76236/2021 | EPI_ISL_3874957 | 2021-09-02      |
| hCoV-19/Japan/PG-76237/2021 | EPI_ISL_3874958 | 2021-09-02      |
| hCoV-19/Japan/PG-76238/2021 | EPI_ISL_3874959 | 2021-09-02      |
| hCoV-19/Japan/PG-76239/2021 | EPI_ISL_3874960 | 2021-09-02      |
| hCoV-19/Japan/PG-76240/2021 | EPI_ISL_3874961 | 2021-09-02      |
| hCoV-19/Japan/PG-76241/2021 | EPI_ISL_3874962 | 2021-09-02      |
| hCoV-19/Japan/PG-76242/2021 | EPI_ISL_3874963 | 2021-09-02      |
| hCoV-19/Japan/PG-76243/2021 | EPI_ISL_3874964 | 2021-09-02      |
| hCoV-19/Japan/PG-76244/2021 | EPI_ISL_3874965 | 2021-09-02      |
| hCoV-19/Japan/PG-76245/2021 | EPI_ISL_3874966 | 2021-09-02      |
| hCoV-19/Japan/PG-76246/2021 | EPI_ISL_3874967 | 2021-09-02      |

| virus_name                  | epiID           | submission_date |
|-----------------------------|-----------------|-----------------|
| hCoV-19/Japan/PG-76248/2021 | EPI_ISL_3874968 | 2021-09-02      |
| hCoV-19/Japan/PG-76256/2021 | EPI_ISL_3874969 | 2021-09-02      |
| hCoV-19/Japan/PG-76258/2021 | EPI_ISL_3874970 | 2021-09-02      |
| hCoV-19/Japan/PG-76260/2021 | EPI_ISL_3874971 | 2021-09-02      |
| hCoV-19/Japan/PG-76261/2021 | EPI_ISL_3874972 | 2021-09-02      |
| hCoV-19/Japan/PG-76263/2021 | EPI_ISL_3874973 | 2021-09-02      |
| hCoV-19/Japan/PG-76264/2021 | EPI_ISL_3871752 | 2021-09-02      |
| hCoV-19/Japan/PG-76265/2021 | EPI_ISL_3871753 | 2021-09-02      |
| hCoV-19/Japan/PG-76266/2021 | EPI_ISL_3871754 | 2021-09-02      |
| hCoV-19/Japan/PG-76267/2021 | EPI_ISL_3871755 | 2021-09-02      |
| hCoV-19/Japan/PG-76268/2021 | EPI_ISL_3871756 | 2021-09-02      |
| hCoV-19/Japan/PG-76269/2021 | EPI_ISL_3871757 | 2021-09-02      |
| hCoV-19/Japan/PG-76270/2021 | EPI_ISL_3871758 | 2021-09-02      |
| hCoV-19/Japan/PG-76271/2021 | EPI_ISL_3871759 | 2021-09-02      |
| hCoV-19/Japan/PG-76272/2021 | EPI_ISL_3871760 | 2021-09-02      |
| hCoV-19/Japan/PG-76273/2021 | EPI_ISL_3871761 | 2021-09-02      |
| hCoV-19/Japan/PG-76274/2021 | EPI_ISL_3871762 | 2021-09-02      |
| hCoV-19/Japan/PG-76275/2021 | EPI_ISL_3871763 | 2021-09-02      |
| hCoV-19/Japan/PG-76276/2021 | EPI_ISL_3871764 | 2021-09-02      |
| hCoV-19/Japan/PG-76277/2021 | EPI_ISL_3871765 | 2021-09-02      |
| hCoV-19/Japan/PG-76278/2021 | EPI_ISL_3871766 | 2021-09-02      |
| hCoV-19/Japan/PG-76279/2021 | EPI_ISL_3871767 | 2021-09-02      |
| hCoV-19/Japan/PG-76280/2021 | EPI_ISL_3871768 | 2021-09-02      |
| hCoV-19/Japan/PG-76281/2021 | EPI_ISL_3871769 | 2021-09-02      |
| hCoV-19/Japan/PG-76282/2021 | EPI_ISL_3871770 | 2021-09-02      |
| hCoV-19/Japan/PG-76283/2021 | EPI_ISL_3871771 | 2021-09-02      |
| hCoV-19/Japan/PG-76284/2021 | EPI_ISL_3871772 | 2021-09-02      |
| hCoV-19/Japan/PG-76285/2021 | EPI_ISL_3871773 | 2021-09-02      |
| hCoV-19/Japan/PG-76286/2021 | EPI_ISL_3871774 | 2021-09-02      |
| hCoV-19/Japan/PG-76287/2021 | EPI_ISL_3876045 | 2021-09-02      |
| hCoV-19/Japan/PG-76288/2021 | EPI_ISL_3876046 | 2021-09-02      |
| hCoV-19/Japan/PG-76289/2021 | EPI_ISL_3876047 | 2021-09-02      |
| hCoV-19/Japan/PG-76290/2021 | EPI_ISL_3876048 | 2021-09-02      |
| hCoV-19/Japan/PG-76291/2021 | EPI_ISL_3876049 | 2021-09-02      |
| hCoV-19/Japan/PG-76292/2021 | EPI_ISL_3876050 | 2021-09-02      |
| hCoV-19/Japan/PG-76293/2021 | EPI_ISL_3876051 | 2021-09-02      |
| hCoV-19/Japan/PG-76294/2021 | EPI_ISL_3876052 | 2021-09-02      |
| hCoV-19/Japan/PG-76295/2021 | EPI_ISL_3876053 | 2021-09-02      |
| hCoV-19/Japan/PG-76296/2021 | EPI_ISL_3876054 | 2021-09-02      |
| hCoV-19/Japan/PG-76297/2021 | EPI_ISL_3876055 | 2021-09-02      |
| hCoV-19/Japan/PG-76298/2021 | EPI_ISL_3876056 | 2021-09-02      |
| hCoV-19/Japan/PG-76299/2021 | EPI_ISL_3876057 | 2021-09-02      |
| hCoV-19/Japan/PG-76300/2021 | EPI_ISL_3876058 | 2021-09-02      |
| hCoV-19/Japan/PG-76301/2021 | EPI_ISL_3876059 | 2021-09-02      |
| hCoV-19/Japan/PG-76302/2021 | EPI_ISL_3876060 | 2021-09-02      |
| hCoV-19/Japan/PG-76303/2021 | EPI_ISL_3876061 | 2021-09-02      |
| hCoV-19/Japan/PG-76304/2021 | EPI_ISL_3876062 | 2021-09-02      |
| hCoV-19/Japan/PG-76305/2021 | EPI_ISL_3876063 | 2021-09-02      |
| hCoV-19/Japan/PG-76306/2021 | EPI_ISL_3876064 | 2021-09-02      |
| hCoV-19/Japan/PG-76307/2021 | EPI_ISL_3876065 | 2021-09-02      |
| hCoV-19/Japan/PG-76308/2021 | EPI_ISL_3876066 | 2021-09-02      |
| hCoV-19/Japan/PG-76309/2021 | EPI_ISL_3876067 | 2021-09-02      |
| hCoV-19/Japan/PG-76310/2021 | EPI_ISL_3876068 | 2021-09-02      |
| hCoV-19/Japan/PG-76311/2021 | EPI_ISL_3876069 | 2021-09-02      |



| virus_name                  | epiID           | submission_date |
|-----------------------------|-----------------|-----------------|
| hCoV-19/Japan/PG-76312/2021 | EPI_ISL_3876070 | 2021-09-02      |
| hCoV-19/Japan/PG-76313/2021 | EPI_ISL_3876071 | 2021-09-02      |
| hCoV-19/Japan/PG-76314/2021 | EPI_ISL_3875839 | 2021-09-02      |
| hCoV-19/Japan/PG-76315/2021 | EPI_ISL_3875840 | 2021-09-02      |
| hCoV-19/Japan/PG-76316/2021 | EPI_ISL_3875841 | 2021-09-02      |
| hCoV-19/Japan/PG-76317/2021 | EPI_ISL_3875842 | 2021-09-02      |
| hCoV-19/Japan/PG-76318/2021 | EPI_ISL_3875843 | 2021-09-02      |
| hCoV-19/Japan/PG-76319/2021 | EPI_ISL_3875844 | 2021-09-02      |
| hCoV-19/Japan/PG-76320/2021 | EPI_ISL_3875845 | 2021-09-02      |
| hCoV-19/Japan/PG-76321/2021 | EPI_ISL_3875846 | 2021-09-02      |
| hCoV-19/Japan/PG-76322/2021 | EPI_ISL_3870630 | 2021-09-02      |
| hCoV-19/Japan/PG-76323/2021 | EPI_ISL_3870631 | 2021-09-02      |
| hCoV-19/Japan/PG-76324/2021 | EPI_ISL_3870632 | 2021-09-02      |
| hCoV-19/Japan/PG-76325/2021 | EPI_ISL_3870633 | 2021-09-02      |
| hCoV-19/Japan/PG-76326/2021 | EPI_ISL_3870634 | 2021-09-02      |
| hCoV-19/Japan/PG-76327/2021 | EPI_ISL_3870635 | 2021-09-02      |
| hCoV-19/Japan/PG-76328/2021 | EPI_ISL_3870636 | 2021-09-02      |
| hCoV-19/Japan/PG-76329/2021 | EPI_ISL_3870637 | 2021-09-02      |
| hCoV-19/Japan/PG-76330/2021 | EPI_ISL_3870638 | 2021-09-02      |
| hCoV-19/Japan/PG-76331/2021 | EPI_ISL_3870639 | 2021-09-02      |
| hCoV-19/Japan/PG-76332/2021 | EPI_ISL_3870640 | 2021-09-02      |
| hCoV-19/Japan/PG-76333/2021 | EPI_ISL_3870641 | 2021-09-02      |
| hCoV-19/Japan/PG-76334/2021 | EPI_ISL_3870642 | 2021-09-02      |
| hCoV-19/Japan/PG-76335/2021 | EPI_ISL_3870643 | 2021-09-02      |
| hCoV-19/Japan/PG-76336/2021 | EPI_ISL_3870644 | 2021-09-02      |
| hCoV-19/Japan/PG-76337/2021 | EPI_ISL_3870645 | 2021-09-02      |
| hCoV-19/Japan/PG-76338/2021 | EPI_ISL_3870646 | 2021-09-02      |
| hCoV-19/Japan/PG-76339/2021 | EPI_ISL_3870647 | 2021-09-02      |
| hCoV-19/Japan/PG-76340/2021 | EPI_ISL_3873433 | 2021-09-02      |
| hCoV-19/Japan/PG-76341/2021 | EPI_ISL_3873434 | 2021-09-02      |
| hCoV-19/Japan/PG-76342/2021 | EPI_ISL_3873435 | 2021-09-02      |
| hCoV-19/Japan/PG-76343/2021 | EPI_ISL_3873436 | 2021-09-02      |
| hCoV-19/Japan/PG-76344/2021 | EPI_ISL_3873437 | 2021-09-02      |
| hCoV-19/Japan/PG-76345/2021 | EPI_ISL_3873438 | 2021-09-02      |
| hCoV-19/Japan/PG-76346/2021 | EPI_ISL_3873439 | 2021-09-02      |
| hCoV-19/Japan/PG-76347/2021 | EPI_ISL_3873440 | 2021-09-02      |
| hCoV-19/Japan/PG-76348/2021 | EPI_ISL_3873441 | 2021-09-02      |
| hCoV-19/Japan/PG-76349/2021 | EPI_ISL_3873442 | 2021-09-02      |
| hCoV-19/Japan/PG-76350/2021 | EPI_ISL_3873443 | 2021-09-02      |
| hCoV-19/Japan/PG-76351/2021 | EPI_ISL_3873444 | 2021-09-02      |
| hCoV-19/Japan/PG-76352/2021 | EPI_ISL_3873445 | 2021-09-02      |
| hCoV-19/Japan/PG-76353/2021 | EPI_ISL_3873446 | 2021-09-02      |
| hCoV-19/Japan/PG-76354/2021 | EPI_ISL_3872632 | 2021-09-02      |
| hCoV-19/Japan/PG-76355/2021 | EPI_ISL_3872633 | 2021-09-02      |
| hCoV-19/Japan/PG-76356/2021 | EPI_ISL_3872634 | 2021-09-02      |
| hCoV-19/Japan/PG-76357/2021 | EPI_ISL_3872635 | 2021-09-02      |
| hCoV-19/Japan/PG-76358/2021 | EPI_ISL_3872636 | 2021-09-02      |
| hCoV-19/Japan/PG-76359/2021 | EPI_ISL_3872637 | 2021-09-02      |
| hCoV-19/Japan/PG-76360/2021 | EPI_ISL_3872638 | 2021-09-02      |
| hCoV-19/Japan/PG-76361/2021 | EPI_ISL_3872639 | 2021-09-02      |
| hCoV-19/Japan/PG-76362/2021 | EPI_ISL_3872640 | 2021-09-02      |
| hCoV-19/Japan/PG-76363/2021 | EPI_ISL_3872641 | 2021-09-02      |
| hCoV-19/Japan/PG-76364/2021 | EPI_ISL_3872642 | 2021-09-02      |
| hCoV-19/Japan/PG-76365/2021 | EPI_ISL_3872643 | 2021-09-02      |

| virus_name                  | epiID           | submission_date |
|-----------------------------|-----------------|-----------------|
| hCoV-19/Japan/PG-76366/2021 | EPI_ISL_3872644 | 2021-09-02      |
| hCoV-19/Japan/PG-76367/2021 | EPI_ISL_3872645 | 2021-09-02      |
| hCoV-19/Japan/PG-76368/2021 | EPI_ISL_3872646 | 2021-09-02      |
| hCoV-19/Japan/PG-76369/2021 | EPI_ISL_3872647 | 2021-09-02      |
| hCoV-19/Japan/PG-76370/2021 | EPI_ISL_3872648 | 2021-09-02      |
| hCoV-19/Japan/PG-76371/2021 | EPI_ISL_3872649 | 2021-09-02      |
| hCoV-19/Japan/PG-76372/2021 | EPI_ISL_3872650 | 2021-09-02      |
| hCoV-19/Japan/PG-76373/2021 | EPI_ISL_3872651 | 2021-09-02      |
| hCoV-19/Japan/PG-76374/2021 | EPI_ISL_3872652 | 2021-09-02      |
| hCoV-19/Japan/PG-76375/2021 | EPI_ISL_3872653 | 2021-09-02      |
| hCoV-19/Japan/PG-76376/2021 | EPI_ISL_3872654 | 2021-09-02      |
| hCoV-19/Japan/PG-76377/2021 | EPI_ISL_3872655 | 2021-09-02      |
| hCoV-19/Japan/PG-76378/2021 | EPI_ISL_3872656 | 2021-09-02      |
| hCoV-19/Japan/PG-76379/2021 | EPI_ISL_3872657 | 2021-09-02      |
| hCoV-19/Japan/PG-76380/2021 | EPI_ISL_3872658 | 2021-09-02      |
| hCoV-19/Japan/PG-76381/2021 | EPI_ISL_3872659 | 2021-09-02      |
| hCoV-19/Japan/PG-76382/2021 | EPI_ISL_3872660 | 2021-09-02      |
| hCoV-19/Japan/PG-76383/2021 | EPI_ISL_3872661 | 2021-09-02      |
| hCoV-19/Japan/PG-76384/2021 | EPI_ISL_3872662 | 2021-09-02      |
| hCoV-19/Japan/PG-76385/2021 | EPI_ISL_3872663 | 2021-09-02      |
| hCoV-19/Japan/PG-76386/2021 | EPI_ISL_3872664 | 2021-09-02      |
| hCoV-19/Japan/PG-76387/2021 | EPI_ISL_3872665 | 2021-09-02      |
| hCoV-19/Japan/PG-76388/2021 | EPI_ISL_3872666 | 2021-09-02      |
| hCoV-19/Japan/PG-76389/2021 | EPI_ISL_3872667 | 2021-09-02      |
| hCoV-19/Japan/PG-76390/2021 | EPI_ISL_3872668 | 2021-09-02      |
| hCoV-19/Japan/PG-76391/2021 | EPI_ISL_3872669 | 2021-09-02      |
| hCoV-19/Japan/PG-76392/2021 | EPI_ISL_3872670 | 2021-09-02      |
| hCoV-19/Japan/PG-76393/2021 | EPI_ISL_3872671 | 2021-09-02      |
| hCoV-19/Japan/PG-76394/2021 | EPI_ISL_3872672 | 2021-09-02      |
| hCoV-19/Japan/PG-76395/2021 | EPI_ISL_3872673 | 2021-09-02      |
| hCoV-19/Japan/PG-76396/2021 | EPI_ISL_3872674 | 2021-09-02      |
| hCoV-19/Japan/PG-76397/2021 | EPI_ISL_3872675 | 2021-09-02      |
| hCoV-19/Japan/PG-76398/2021 | EPI_ISL_3872676 | 2021-09-02      |
| hCoV-19/Japan/PG-76399/2021 | EPI_ISL_3872677 | 2021-09-02      |
| hCoV-19/Japan/PG-76400/2021 | EPI_ISL_3872678 | 2021-09-02      |
| hCoV-19/Japan/PG-76401/2021 | EPI_ISL_3872679 | 2021-09-02      |
| hCoV-19/Japan/PG-76402/2021 | EPI_ISL_3872680 | 2021-09-02      |
| hCoV-19/Japan/PG-76403/2021 | EPI_ISL_3872681 | 2021-09-02      |
| hCoV-19/Japan/PG-76404/2021 | EPI_ISL_3872682 | 2021-09-02      |
| hCoV-19/Japan/PG-76405/2021 | EPI_ISL_3872683 | 2021-09-02      |
| hCoV-19/Japan/PG-76406/2021 | EPI_ISL_3872684 | 2021-09-02      |
| hCoV-19/Japan/PG-76407/2021 | EPI_ISL_3872685 | 2021-09-02      |
| hCoV-19/Japan/PG-76408/2021 | EPI_ISL_3872686 | 2021-09-02      |
| hCoV-19/Japan/PG-76409/2021 | EPI_ISL_3872687 | 2021-09-02      |
| hCoV-19/Japan/PG-76410/2021 | EPI_ISL_3872688 | 2021-09-02      |
| hCoV-19/Japan/PG-76411/2021 | EPI_ISL_3872689 | 2021-09-02      |
| hCoV-19/Japan/PG-76412/2021 | EPI_ISL_3872690 | 2021-09-02      |
| hCoV-19/Japan/PG-76413/2021 | EPI_ISL_3872691 | 2021-09-02      |
| hCoV-19/Japan/PG-76414/2021 | EPI_ISL_3872692 | 2021-09-02      |
| hCoV-19/Japan/PG-76415/2021 | EPI_ISL_3872693 | 2021-09-02      |
| hCoV-19/Japan/PG-76416/2021 | EPI_ISL_3872694 | 2021-09-02      |
| hCoV-19/Japan/PG-76417/2021 | EPI_ISL_3872695 | 2021-09-02      |
| hCoV-19/Japan/PG-76418/2021 | EPI_ISL_3872696 | 2021-09-02      |
| hCoV-19/Japan/PG-76419/2021 | EPI_ISL_3872697 | 2021-09-02      |

| virus_name                  | epiID           | submission_date |
|-----------------------------|-----------------|-----------------|
| hCoV-19/Japan/PG-76420/2021 | EPI_ISL_3872698 | 2021-09-02      |
| hCoV-19/Japan/PG-76421/2021 | EPI_ISL_3872699 | 2021-09-02      |
| hCoV-19/Japan/PG-76422/2021 | EPI_ISL_3872700 | 2021-09-02      |
| hCoV-19/Japan/PG-76423/2021 | EPI_ISL_3872701 | 2021-09-02      |
| hCoV-19/Japan/PG-76424/2021 | EPI_ISL_3872702 | 2021-09-02      |
| hCoV-19/Japan/PG-76425/2021 | EPI_ISL_3872703 | 2021-09-02      |
| hCoV-19/Japan/PG-76426/2021 | EPI_ISL_3872704 | 2021-09-02      |
| hCoV-19/Japan/PG-76427/2021 | EPI_ISL_3872705 | 2021-09-02      |
| hCoV-19/Japan/PG-76428/2021 | EPI_ISL_3872706 | 2021-09-02      |
| hCoV-19/Japan/PG-76429/2021 | EPI_ISL_3872707 | 2021-09-02      |
| hCoV-19/Japan/PG-76430/2021 | EPI_ISL_3872708 | 2021-09-02      |
| hCoV-19/Japan/PG-76431/2021 | EPI_ISL_3872709 | 2021-09-02      |
| hCoV-19/Japan/PG-76432/2021 | EPI_ISL_3871586 | 2021-09-02      |
| hCoV-19/Japan/PG-76433/2021 | EPI_ISL_3871587 | 2021-09-02      |
| hCoV-19/Japan/PG-76434/2021 | EPI_ISL_3871588 | 2021-09-02      |
| hCoV-19/Japan/PG-76435/2021 | EPI_ISL_3871589 | 2021-09-02      |
| hCoV-19/Japan/PG-76436/2021 | EPI_ISL_3871590 | 2021-09-02      |
| hCoV-19/Japan/PG-76437/2021 | EPI_ISL_3871591 | 2021-09-02      |
| hCoV-19/Japan/PG-76438/2021 | EPI_ISL_3871592 | 2021-09-02      |
| hCoV-19/Japan/PG-76439/2021 | EPI_ISL_3871593 | 2021-09-02      |
| hCoV-19/Japan/PG-76440/2021 | EPI_ISL_3871594 | 2021-09-02      |
| hCoV-19/Japan/PG-76441/2021 | EPI_ISL_3871595 | 2021-09-02      |
| hCoV-19/Japan/PG-76442/2021 | EPI_ISL_3871596 | 2021-09-02      |
| hCoV-19/Japan/PG-76443/2021 | EPI_ISL_3871597 | 2021-09-02      |
| hCoV-19/Japan/PG-76444/2021 | EPI_ISL_3871598 | 2021-09-02      |
| hCoV-19/Japan/PG-76445/2021 | EPI_ISL_3871599 | 2021-09-02      |
| hCoV-19/Japan/PG-76446/2021 | EPI_ISL_3871600 | 2021-09-02      |
| hCoV-19/Japan/PG-76447/2021 | EPI_ISL_3871601 | 2021-09-02      |
| hCoV-19/Japan/PG-76448/2021 | EPI_ISL_3871602 | 2021-09-02      |
| hCoV-19/Japan/PG-76449/2021 | EPI_ISL_3871603 | 2021-09-02      |
| hCoV-19/Japan/PG-76450/2021 | EPI_ISL_3871604 | 2021-09-02      |
| hCoV-19/Japan/PG-76451/2021 | EPI_ISL_3871605 | 2021-09-02      |
| hCoV-19/Japan/PG-76452/2021 | EPI_ISL_3871606 | 2021-09-02      |
| hCoV-19/Japan/PG-76453/2021 | EPI_ISL_3871607 | 2021-09-02      |
| hCoV-19/Japan/PG-76454/2021 | EPI_ISL_3871608 | 2021-09-02      |
| hCoV-19/Japan/PG-76455/2021 | EPI_ISL_3871609 | 2021-09-02      |
| hCoV-19/Japan/PG-76456/2021 | EPI_ISL_3871018 | 2021-09-02      |
| hCoV-19/Japan/PG-76457/2021 | EPI_ISL_3871019 | 2021-09-02      |
| hCoV-19/Japan/PG-76458/2021 | EPI_ISL_3871020 | 2021-09-02      |
| hCoV-19/Japan/PG-76459/2021 | EPI_ISL_3871021 | 2021-09-02      |
| hCoV-19/Japan/PG-76460/2021 | EPI_ISL_3871022 | 2021-09-02      |
| hCoV-19/Japan/PG-76461/2021 | EPI_ISL_3871023 | 2021-09-02      |
| hCoV-19/Japan/PG-76462/2021 | EPI_ISL_3871024 | 2021-09-02      |
| hCoV-19/Japan/PG-76463/2021 | EPI_ISL_3871025 | 2021-09-02      |
| hCoV-19/Japan/PG-76464/2021 | EPI_ISL_3871026 | 2021-09-02      |
| hCoV-19/Japan/PG-76465/2021 | EPI_ISL_3871027 | 2021-09-02      |
| hCoV-19/Japan/PG-76466/2021 | EPI_ISL_3871028 | 2021-09-02      |
| hCoV-19/Japan/PG-76467/2021 | EPI_ISL_3871029 | 2021-09-02      |
| hCoV-19/Japan/PG-76468/2021 | EPI_ISL_3871030 | 2021-09-02      |
| hCoV-19/Japan/PG-76469/2021 | EPI_ISL_3871032 | 2021-09-02      |
| hCoV-19/Japan/PG-76470/2021 | EPI_ISL_3871034 | 2021-09-02      |
| hCoV-19/Japan/PG-76471/2021 | EPI_ISL_3871036 | 2021-09-02      |
| hCoV-19/Japan/PG-76472/2021 | EPI_ISL_3871038 | 2021-09-02      |
| hCoV-19/Japan/PG-76473/2021 | EPI_ISL_3871040 | 2021-09-02      |

| virus_name                  | epiID           | submission_date |
|-----------------------------|-----------------|-----------------|
| hCoV-19/Japan/PG-76474/2021 | EPI_ISL_3871042 | 2021-09-02      |
| hCoV-19/Japan/PG-76475/2021 | EPI_ISL_3871044 | 2021-09-02      |
| hCoV-19/Japan/PG-76476/2021 | EPI_ISL_3871046 | 2021-09-02      |
| hCoV-19/Japan/PG-76477/2021 | EPI_ISL_3871047 | 2021-09-02      |
| hCoV-19/Japan/PG-76478/2021 | EPI_ISL_3871049 | 2021-09-02      |
| hCoV-19/Japan/PG-76479/2021 | EPI_ISL_3871051 | 2021-09-02      |
| hCoV-19/Japan/PG-76480/2021 | EPI_ISL_3871236 | 2021-09-02      |
| hCoV-19/Japan/PG-76481/2021 | EPI_ISL_3871237 | 2021-09-02      |
| hCoV-19/Japan/PG-76482/2021 | EPI_ISL_3871238 | 2021-09-02      |
| hCoV-19/Japan/PG-76483/2021 | EPI_ISL_3871239 | 2021-09-02      |
| hCoV-19/Japan/PG-76484/2021 | EPI_ISL_3871240 | 2021-09-02      |
| hCoV-19/Japan/PG-76485/2021 | EPI_ISL_3871241 | 2021-09-02      |
| hCoV-19/Japan/PG-76486/2021 | EPI_ISL_3871242 | 2021-09-02      |
| hCoV-19/Japan/PG-76487/2021 | EPI_ISL_3871243 | 2021-09-02      |
| hCoV-19/Japan/PG-76488/2021 | EPI_ISL_3871244 | 2021-09-02      |
| hCoV-19/Japan/PG-76489/2021 | EPI_ISL_3871245 | 2021-09-02      |
| hCoV-19/Japan/PG-76490/2021 | EPI_ISL_3871246 | 2021-09-02      |
| hCoV-19/Japan/PG-76491/2021 | EPI_ISL_3871247 | 2021-09-02      |
| hCoV-19/Japan/PG-76492/2021 | EPI_ISL_3871248 | 2021-09-02      |
| hCoV-19/Japan/PG-76493/2021 | EPI_ISL_3871249 | 2021-09-02      |
| hCoV-19/Japan/PG-76494/2021 | EPI_ISL_3871250 | 2021-09-02      |
| hCoV-19/Japan/PG-76495/2021 | EPI_ISL_3871251 | 2021-09-02      |
| hCoV-19/Japan/PG-76496/2021 | EPI_ISL_3871252 | 2021-09-02      |
| hCoV-19/Japan/PG-76497/2021 | EPI_ISL_3871253 | 2021-09-02      |
| hCoV-19/Japan/PG-76498/2021 | EPI_ISL_3871254 | 2021-09-02      |
| hCoV-19/Japan/PG-76499/2021 | EPI_ISL_3871255 | 2021-09-02      |
| hCoV-19/Japan/PG-76500/2021 | EPI_ISL_3871256 | 2021-09-02      |
| hCoV-19/Japan/PG-76501/2021 | EPI_ISL_3871257 | 2021-09-02      |
| hCoV-19/Japan/PG-76502/2021 | EPI_ISL_3871258 | 2021-09-02      |
| hCoV-19/Japan/PG-76503/2021 | EPI_ISL_3871259 | 2021-09-02      |
| hCoV-19/Japan/PG-76504/2021 | EPI_ISL_3874009 | 2021-09-02      |
| hCoV-19/Japan/PG-76505/2021 | EPI_ISL_3874010 | 2021-09-02      |
| hCoV-19/Japan/PG-76506/2021 | EPI_ISL_3874011 | 2021-09-02      |
| hCoV-19/Japan/PG-76507/2021 | EPI_ISL_3874012 | 2021-09-02      |
| hCoV-19/Japan/PG-76508/2021 | EPI_ISL_3874013 | 2021-09-02      |
| hCoV-19/Japan/PG-76509/2021 | EPI_ISL_3874014 | 2021-09-02      |
| hCoV-19/Japan/PG-76510/2021 | EPI_ISL_3874015 | 2021-09-02      |
| hCoV-19/Japan/PG-76511/2021 | EPI_ISL_3874016 | 2021-09-02      |
| hCoV-19/Japan/PG-76512/2021 | EPI_ISL_3874017 | 2021-09-02      |
| hCoV-19/Japan/PG-76513/2021 | EPI_ISL_3874018 | 2021-09-02      |
| hCoV-19/Japan/PG-76517/2021 | EPI_ISL_3874019 | 2021-09-02      |
| hCoV-19/Japan/PG-76518/2021 | EPI_ISL_3874020 | 2021-09-02      |
| hCoV-19/Japan/PG-76519/2021 | EPI_ISL_3874021 | 2021-09-02      |
| hCoV-19/Japan/PG-76520/2021 | EPI_ISL_3874022 | 2021-09-02      |
| hCoV-19/Japan/PG-76521/2021 | EPI_ISL_3874023 | 2021-09-02      |
| hCoV-19/Japan/PG-76522/2021 | EPI_ISL_3874024 | 2021-09-02      |
| hCoV-19/Japan/PG-76523/2021 | EPI_ISL_3874025 | 2021-09-02      |
| hCoV-19/Japan/PG-76524/2021 | EPI_ISL_3874026 | 2021-09-02      |
| hCoV-19/Japan/PG-76525/2021 | EPI_ISL_3874027 | 2021-09-02      |
| hCoV-19/Japan/PG-76526/2021 | EPI_ISL_3874305 | 2021-09-02      |
| hCoV-19/Japan/PG-76527/2021 | EPI_ISL_3874306 | 2021-09-02      |
| hCoV-19/Japan/PG-76528/2021 | EPI_ISL_3874307 | 2021-09-02      |
| hCoV-19/Japan/PG-76529/2021 | EPI_ISL_3874167 | 2021-09-02      |
| hCoV-19/Japan/PG-76530/2021 | EPI_ISL_3874168 | 2021-09-02      |

| virus_name                  | epiID           | submission_date |
|-----------------------------|-----------------|-----------------|
| hCoV-19/Japan/PG-76531/2021 | EPI_ISL_3874169 | 2021-09-02      |
| hCoV-19/Japan/PG-76532/2021 | EPI_ISL_3874170 | 2021-09-02      |
| hCoV-19/Japan/PG-76533/2021 | EPI_ISL_3874171 | 2021-09-02      |
| hCoV-19/Japan/PG-76534/2021 | EPI_ISL_3874172 | 2021-09-02      |
| hCoV-19/Japan/PG-76535/2021 | EPI_ISL_3874173 | 2021-09-02      |
| hCoV-19/Japan/PG-76536/2021 | EPI_ISL_3874174 | 2021-09-02      |
| hCoV-19/Japan/PG-76537/2021 | EPI_ISL_3874175 | 2021-09-02      |
| hCoV-19/Japan/PG-76538/2021 | EPI_ISL_3874176 | 2021-09-02      |
| hCoV-19/Japan/PG-76539/2021 | EPI_ISL_3874177 | 2021-09-02      |
| hCoV-19/Japan/PG-76540/2021 | EPI_ISL_3874178 | 2021-09-02      |
| hCoV-19/Japan/PG-76541/2021 | EPI_ISL_3874179 | 2021-09-02      |
| hCoV-19/Japan/PG-76542/2021 | EPI_ISL_3874180 | 2021-09-02      |
| hCoV-19/Japan/PG-76543/2021 | EPI_ISL_3874181 | 2021-09-02      |
| hCoV-19/Japan/PG-76544/2021 | EPI_ISL_3886453 | 2021-09-02      |
| hCoV-19/Japan/PG-76545/2021 | EPI_ISL_3886455 | 2021-09-02      |
| hCoV-19/Japan/PG-76546/2021 | EPI_ISL_3886457 | 2021-09-02      |
| hCoV-19/Japan/PG-76547/2021 | EPI_ISL_3886459 | 2021-09-02      |
| hCoV-19/Japan/PG-76548/2021 | EPI_ISL_3886461 | 2021-09-02      |
| hCoV-19/Japan/PG-76549/2021 | EPI_ISL_3886463 | 2021-09-02      |
| hCoV-19/Japan/PG-76550/2021 | EPI_ISL_3886464 | 2021-09-02      |
| hCoV-19/Japan/PG-76551/2021 | EPI_ISL_3886467 | 2021-09-02      |
| hCoV-19/Japan/PG-76552/2021 | EPI_ISL_3886469 | 2021-09-02      |
| hCoV-19/Japan/PG-76553/2021 | EPI_ISL_3886471 | 2021-09-02      |
| hCoV-19/Japan/PG-76554/2021 | EPI_ISL_3886474 | 2021-09-02      |
| hCoV-19/Japan/PG-76555/2021 | EPI_ISL_3886476 | 2021-09-02      |
| hCoV-19/Japan/PG-76556/2021 | EPI_ISL_3886478 | 2021-09-02      |
| hCoV-19/Japan/PG-76557/2021 | EPI_ISL_3886481 | 2021-09-02      |
| hCoV-19/Japan/PG-76558/2021 | EPI_ISL_3886483 | 2021-09-02      |
| hCoV-19/Japan/PG-76559/2021 | EPI_ISL_3886485 | 2021-09-02      |
| hCoV-19/Japan/PG-76560/2021 | EPI_ISL_3886487 | 2021-09-02      |
| hCoV-19/Japan/PG-76561/2021 | EPI_ISL_3886489 | 2021-09-02      |
| hCoV-19/Japan/PG-76562/2021 | EPI_ISL_3886491 | 2021-09-02      |
| hCoV-19/Japan/PG-76563/2021 | EPI_ISL_3886493 | 2021-09-02      |
| hCoV-19/Japan/PG-76564/2021 | EPI_ISL_3886495 | 2021-09-02      |
| hCoV-19/Japan/PG-76565/2021 | EPI_ISL_3886497 | 2021-09-02      |
| hCoV-19/Japan/PG-76566/2021 | EPI_ISL_3886499 | 2021-09-02      |
| hCoV-19/Japan/PG-76567/2021 | EPI_ISL_3886501 | 2021-09-02      |
| hCoV-19/Japan/PG-76568/2021 | EPI_ISL_3886503 | 2021-09-02      |
| hCoV-19/Japan/PG-76569/2021 | EPI_ISL_3886505 | 2021-09-02      |
| hCoV-19/Japan/PG-76570/2021 | EPI_ISL_3886507 | 2021-09-02      |
| hCoV-19/Japan/PG-76571/2021 | EPI_ISL_3886509 | 2021-09-02      |
| hCoV-19/Japan/PG-76572/2021 | EPI_ISL_3886511 | 2021-09-02      |
| hCoV-19/Japan/PG-76573/2021 | EPI_ISL_3886513 | 2021-09-02      |
| hCoV-19/Japan/PG-76574/2021 | EPI_ISL_3886515 | 2021-09-02      |
| hCoV-19/Japan/PG-76575/2021 | EPI_ISL_3886518 | 2021-09-02      |
| hCoV-19/Japan/PG-76576/2021 | EPI_ISL_3886520 | 2021-09-02      |
| hCoV-19/Japan/PG-76577/2021 | EPI_ISL_3886522 | 2021-09-02      |
| hCoV-19/Japan/PG-76578/2021 | EPI_ISL_3886524 | 2021-09-02      |
| hCoV-19/Japan/PG-76579/2021 | EPI_ISL_3886527 | 2021-09-02      |
| hCoV-19/Japan/PG-76580/2021 | EPI_ISL_3886529 | 2021-09-02      |
| hCoV-19/Japan/PG-76581/2021 | EPI_ISL_3886531 | 2021-09-02      |
| hCoV-19/Japan/PG-76582/2021 | EPI_ISL_3886533 | 2021-09-02      |
| hCoV-19/Japan/PG-76583/2021 | EPI_ISL_3886534 | 2021-09-02      |
| hCoV-19/Japan/PG-76584/2021 | EPI_ISL_3886537 | 2021-09-02      |

| virus_name                  | epiID           | submission_date |
|-----------------------------|-----------------|-----------------|
| hCoV-19/Japan/PG-76585/2021 | EPI_ISL_3886539 | 2021-09-02      |
| hCoV-19/Japan/PG-76586/2021 | EPI_ISL_3886541 | 2021-09-02      |
| hCoV-19/Japan/PG-76587/2021 | EPI_ISL_3886544 | 2021-09-02      |
| hCoV-19/Japan/PG-76588/2021 | EPI_ISL_3886545 | 2021-09-02      |
| hCoV-19/Japan/PG-76589/2021 | EPI_ISL_3886548 | 2021-09-02      |
| hCoV-19/Japan/PG-76590/2021 | EPI_ISL_3886551 | 2021-09-02      |
| hCoV-19/Japan/PG-76591/2021 | EPI_ISL_3886555 | 2021-09-02      |
| hCoV-19/Japan/PG-76592/2021 | EPI_ISL_3886559 | 2021-09-02      |
| hCoV-19/Japan/PG-76593/2021 | EPI_ISL_3886563 | 2021-09-02      |
| hCoV-19/Japan/PG-76594/2021 | EPI_ISL_3886567 | 2021-09-02      |
| hCoV-19/Japan/PG-76595/2021 | EPI_ISL_3886570 | 2021-09-02      |
| hCoV-19/Japan/PG-76596/2021 | EPI_ISL_3886572 | 2021-09-02      |
| hCoV-19/Japan/PG-76597/2021 | EPI_ISL_3886575 | 2021-09-02      |
| hCoV-19/Japan/PG-76598/2021 | EPI_ISL_3886577 | 2021-09-02      |
| hCoV-19/Japan/PG-76599/2021 | EPI_ISL_3886580 | 2021-09-02      |
| hCoV-19/Japan/PG-76600/2021 | EPI_ISL_3886583 | 2021-09-02      |
| hCoV-19/Japan/PG-76601/2021 | EPI_ISL_3886585 | 2021-09-02      |
| hCoV-19/Japan/PG-76602/2021 | EPI_ISL_3886588 | 2021-09-02      |
| hCoV-19/Japan/PG-76603/2021 | EPI_ISL_3886589 | 2021-09-02      |
| hCoV-19/Japan/PG-76604/2021 | EPI_ISL_3886592 | 2021-09-02      |
| hCoV-19/Japan/PG-76605/2021 | EPI_ISL_3886594 | 2021-09-02      |
| hCoV-19/Japan/PG-76606/2021 | EPI_ISL_3886596 | 2021-09-02      |
| hCoV-19/Japan/PG-76607/2021 | EPI_ISL_3886599 | 2021-09-02      |
| hCoV-19/Japan/PG-76608/2021 | EPI_ISL_3886601 | 2021-09-02      |
| hCoV-19/Japan/PG-76609/2021 | EPI_ISL_3886602 | 2021-09-02      |
| hCoV-19/Japan/PG-76610/2021 | EPI_ISL_3886605 | 2021-09-02      |
| hCoV-19/Japan/PG-76611/2021 | EPI_ISL_3886608 | 2021-09-02      |
| hCoV-19/Japan/PG-76612/2021 | EPI_ISL_3886610 | 2021-09-02      |
| hCoV-19/Japan/PG-76613/2021 | EPI_ISL_3886612 | 2021-09-02      |
| hCoV-19/Japan/PG-76614/2021 | EPI_ISL_3886614 | 2021-09-02      |
| hCoV-19/Japan/PG-76615/2021 | EPI_ISL_3886616 | 2021-09-02      |
| hCoV-19/Japan/PG-76616/2021 | EPI_ISL_3886618 | 2021-09-02      |
| hCoV-19/Japan/PG-76617/2021 | EPI_ISL_3886620 | 2021-09-02      |
| hCoV-19/Japan/PG-76618/2021 | EPI_ISL_3886622 | 2021-09-02      |
| hCoV-19/Japan/PG-76619/2021 | EPI_ISL_3886625 | 2021-09-02      |
| hCoV-19/Japan/PG-76620/2021 | EPI_ISL_3886626 | 2021-09-02      |
| hCoV-19/Japan/PG-76621/2021 | EPI_ISL_3886628 | 2021-09-02      |
| hCoV-19/Japan/PG-76622/2021 | EPI_ISL_3886630 | 2021-09-02      |
| hCoV-19/Japan/PG-76623/2021 | EPI_ISL_3886633 | 2021-09-02      |
| hCoV-19/Japan/PG-76624/2021 | EPI_ISL_3886636 | 2021-09-02      |
| hCoV-19/Japan/PG-76625/2021 | EPI_ISL_3886638 | 2021-09-02      |
| hCoV-19/Japan/PG-76626/2021 | EPI_ISL_3886640 | 2021-09-02      |
| hCoV-19/Japan/PG-76627/2021 | EPI_ISL_3886642 | 2021-09-02      |
| hCoV-19/Japan/PG-76628/2021 | EPI_ISL_3886644 | 2021-09-02      |
| hCoV-19/Japan/PG-76629/2021 | EPI_ISL_3886645 | 2021-09-02      |
| hCoV-19/Japan/PG-76630/2021 | EPI_ISL_3886647 | 2021-09-02      |
| hCoV-19/Japan/PG-76631/2021 | EPI_ISL_3886649 | 2021-09-02      |
| hCoV-19/Japan/PG-76632/2021 | EPI_ISL_3886651 | 2021-09-02      |
| hCoV-19/Japan/PG-76633/2021 | EPI_ISL_3886653 | 2021-09-02      |
| hCoV-19/Japan/PG-76634/2021 | EPI_ISL_3886655 | 2021-09-02      |
| hCoV-19/Japan/PG-76635/2021 | EPI_ISL_3886658 | 2021-09-02      |
| hCoV-19/Japan/PG-76636/2021 | EPI_ISL_3886660 | 2021-09-02      |
| hCoV-19/Japan/PG-76637/2021 | EPI_ISL_3886661 | 2021-09-02      |
| hCoV-19/Japan/PG-76638/2021 | EPI_ISL_3886663 | 2021-09-02      |

| virus_name                  | epiID           | submission_date |
|-----------------------------|-----------------|-----------------|
| hCoV-19/Japan/PG-76639/2021 | EPI_ISL_3886664 | 2021-09-02      |
| hCoV-19/Japan/PG-76640/2021 | EPI_ISL_3886666 | 2021-09-02      |
| hCoV-19/Japan/PG-76641/2021 | EPI_ISL_3886668 | 2021-09-02      |
| hCoV-19/Japan/PG-76642/2021 | EPI_ISL_3886670 | 2021-09-02      |
| hCoV-19/Japan/PG-76643/2021 | EPI_ISL_3886672 | 2021-09-02      |
| hCoV-19/Japan/PG-76644/2021 | EPI_ISL_3886674 | 2021-09-02      |
| hCoV-19/Japan/PG-76645/2021 | EPI_ISL_3886677 | 2021-09-02      |
| hCoV-19/Japan/PG-76646/2021 | EPI_ISL_3886679 | 2021-09-02      |
| hCoV-19/Japan/PG-76647/2021 | EPI_ISL_3886681 | 2021-09-02      |
| hCoV-19/Japan/PG-76648/2021 | EPI_ISL_3886683 | 2021-09-02      |
| hCoV-19/Japan/PG-76649/2021 | EPI_ISL_3886686 | 2021-09-02      |
| hCoV-19/Japan/PG-76650/2021 | EPI_ISL_3886688 | 2021-09-02      |
| hCoV-19/Japan/PG-76651/2021 | EPI_ISL_3886691 | 2021-09-02      |
| hCoV-19/Japan/PG-76652/2021 | EPI_ISL_3886693 | 2021-09-02      |
| hCoV-19/Japan/PG-76653/2021 | EPI_ISL_3886695 | 2021-09-02      |
| hCoV-19/Japan/PG-76654/2021 | EPI_ISL_3886698 | 2021-09-02      |
| hCoV-19/Japan/PG-76655/2021 | EPI_ISL_3886700 | 2021-09-02      |
| hCoV-19/Japan/PG-76656/2021 | EPI_ISL_3886702 | 2021-09-02      |
| hCoV-19/Japan/PG-76657/2021 | EPI_ISL_3886705 | 2021-09-02      |
| hCoV-19/Japan/PG-76658/2021 | EPI_ISL_3886707 | 2021-09-02      |
| hCoV-19/Japan/PG-76659/2021 | EPI_ISL_3886710 | 2021-09-02      |
| hCoV-19/Japan/PG-76660/2021 | EPI_ISL_3886711 | 2021-09-02      |
| hCoV-19/Japan/PG-76661/2021 | EPI_ISL_3886713 | 2021-09-02      |
| hCoV-19/Japan/PG-76662/2021 | EPI_ISL_3886714 | 2021-09-02      |
| hCoV-19/Japan/PG-76663/2021 | EPI_ISL_3886717 | 2021-09-02      |
| hCoV-19/Japan/PG-76664/2021 | EPI_ISL_3886718 | 2021-09-02      |
| hCoV-19/Japan/PG-76665/2021 | EPI_ISL_3886719 | 2021-09-02      |
| hCoV-19/Japan/PG-76666/2021 | EPI_ISL_3886722 | 2021-09-02      |
| hCoV-19/Japan/PG-76667/2021 | EPI_ISL_3886723 | 2021-09-02      |
| hCoV-19/Japan/PG-76668/2021 | EPI_ISL_3886726 | 2021-09-02      |
| hCoV-19/Japan/PG-76669/2021 | EPI_ISL_3886728 | 2021-09-02      |
| hCoV-19/Japan/PG-76670/2021 | EPI_ISL_3886730 | 2021-09-02      |
| hCoV-19/Japan/PG-76671/2021 | EPI_ISL_3886732 | 2021-09-02      |
| hCoV-19/Japan/PG-76672/2021 | EPI_ISL_3886734 | 2021-09-02      |
| hCoV-19/Japan/PG-76673/2021 | EPI_ISL_3886736 | 2021-09-02      |
| hCoV-19/Japan/PG-76674/2021 | EPI_ISL_3886738 | 2021-09-02      |
| hCoV-19/Japan/PG-76675/2021 | EPI_ISL_3886740 | 2021-09-02      |
| hCoV-19/Japan/PG-76676/2021 | EPI_ISL_3886742 | 2021-09-02      |
| hCoV-19/Japan/PG-76677/2021 | EPI_ISL_3886744 | 2021-09-02      |
| hCoV-19/Japan/PG-76678/2021 | EPI_ISL_3886746 | 2021-09-02      |
| hCoV-19/Japan/PG-76679/2021 | EPI_ISL_3886748 | 2021-09-02      |
| hCoV-19/Japan/PG-76680/2021 | EPI_ISL_3886750 | 2021-09-02      |
| hCoV-19/Japan/PG-76681/2021 | EPI_ISL_3886751 | 2021-09-02      |
| hCoV-19/Japan/PG-76682/2021 | EPI_ISL_3886753 | 2021-09-02      |
| hCoV-19/Japan/PG-76683/2021 | EPI_ISL_3886755 | 2021-09-02      |
| hCoV-19/Japan/PG-76684/2021 | EPI_ISL_3886756 | 2021-09-02      |
| hCoV-19/Japan/PG-76685/2021 | EPI_ISL_3886757 | 2021-09-02      |
| hCoV-19/Japan/PG-76686/2021 | EPI_ISL_3886759 | 2021-09-02      |
| hCoV-19/Japan/PG-76687/2021 | EPI_ISL_3886762 | 2021-09-02      |
| hCoV-19/Japan/PG-76688/2021 | EPI_ISL_3886763 | 2021-09-02      |
| hCoV-19/Japan/PG-76689/2021 | EPI_ISL_3886766 | 2021-09-02      |
| hCoV-19/Japan/PG-76690/2021 | EPI_ISL_3886768 | 2021-09-02      |
| hCoV-19/Japan/PG-76691/2021 | EPI_ISL_3886771 | 2021-09-02      |
| hCoV-19/Japan/PG-76692/2021 | EPI_ISL_3886773 | 2021-09-02      |

| virus_name                  | epiID           | submission_date |
|-----------------------------|-----------------|-----------------|
| hCoV-19/Japan/PG-76693/2021 | EPI_ISL_3886775 | 2021-09-02      |
| hCoV-19/Japan/PG-76694/2021 | EPI_ISL_3886777 | 2021-09-02      |
| hCoV-19/Japan/PG-76695/2021 | EPI_ISL_3886779 | 2021-09-02      |
| hCoV-19/Japan/PG-76696/2021 | EPI_ISL_3886781 | 2021-09-02      |
| hCoV-19/Japan/PG-76697/2021 | EPI_ISL_3886783 | 2021-09-02      |
| hCoV-19/Japan/PG-76698/2021 | EPI_ISL_3886785 | 2021-09-02      |
| hCoV-19/Japan/PG-76699/2021 | EPI_ISL_3886788 | 2021-09-02      |
| hCoV-19/Japan/PG-76700/2021 | EPI_ISL_3886790 | 2021-09-02      |
| hCoV-19/Japan/PG-76701/2021 | EPI_ISL_3886792 | 2021-09-02      |
| hCoV-19/Japan/PG-76702/2021 | EPI_ISL_3886794 | 2021-09-02      |
| hCoV-19/Japan/PG-76703/2021 | EPI_ISL_3886795 | 2021-09-02      |
| hCoV-19/Japan/PG-76704/2021 | EPI_ISL_3886796 | 2021-09-02      |
| hCoV-19/Japan/PG-76705/2021 | EPI_ISL_3886798 | 2021-09-02      |
| hCoV-19/Japan/PG-76706/2021 | EPI_ISL_3886799 | 2021-09-02      |
| hCoV-19/Japan/PG-76707/2021 | EPI_ISL_3886801 | 2021-09-02      |
| hCoV-19/Japan/PG-76708/2021 | EPI_ISL_3886804 | 2021-09-02      |
| hCoV-19/Japan/PG-76709/2021 | EPI_ISL_3886806 | 2021-09-02      |
| hCoV-19/Japan/PG-76710/2021 | EPI_ISL_3886808 | 2021-09-02      |
| hCoV-19/Japan/PG-76711/2021 | EPI_ISL_3886811 | 2021-09-02      |
| hCoV-19/Japan/PG-76712/2021 | EPI_ISL_3886813 | 2021-09-02      |
| hCoV-19/Japan/PG-76713/2021 | EPI_ISL_3886816 | 2021-09-02      |
| hCoV-19/Japan/PG-76714/2021 | EPI_ISL_3886817 | 2021-09-02      |
| hCoV-19/Japan/PG-76715/2021 | EPI_ISL_3886820 | 2021-09-02      |
| hCoV-19/Japan/PG-76716/2021 | EPI_ISL_3886822 | 2021-09-02      |
| hCoV-19/Japan/PG-76717/2021 | EPI_ISL_3886824 | 2021-09-02      |
| hCoV-19/Japan/PG-76718/2021 | EPI_ISL_3886826 | 2021-09-02      |
| hCoV-19/Japan/PG-76719/2021 | EPI_ISL_3886828 | 2021-09-02      |
| hCoV-19/Japan/PG-76720/2021 | EPI_ISL_3886830 | 2021-09-02      |
| hCoV-19/Japan/PG-76721/2021 | EPI_ISL_3886832 | 2021-09-02      |
| hCoV-19/Japan/PG-76722/2021 | EPI_ISL_3886834 | 2021-09-02      |
| hCoV-19/Japan/PG-76723/2021 | EPI_ISL_3886836 | 2021-09-02      |
| hCoV-19/Japan/PG-76724/2021 | EPI_ISL_3886838 | 2021-09-02      |
| hCoV-19/Japan/PG-76725/2021 | EPI_ISL_3886840 | 2021-09-02      |
| hCoV-19/Japan/PG-76726/2021 | EPI_ISL_3886842 | 2021-09-02      |
| hCoV-19/Japan/PG-76727/2021 | EPI_ISL_3886845 | 2021-09-02      |
| hCoV-19/Japan/PG-76728/2021 | EPI_ISL_3886847 | 2021-09-02      |
| hCoV-19/Japan/PG-76729/2021 | EPI_ISL_3886849 | 2021-09-02      |
| hCoV-19/Japan/PG-76730/2021 | EPI_ISL_3886851 | 2021-09-02      |
| hCoV-19/Japan/PG-76731/2021 | EPI_ISL_3886853 | 2021-09-02      |
| hCoV-19/Japan/PG-76732/2021 | EPI_ISL_3886855 | 2021-09-02      |
| hCoV-19/Japan/PG-76733/2021 | EPI_ISL_3886858 | 2021-09-02      |
| hCoV-19/Japan/PG-76734/2021 | EPI_ISL_3886860 | 2021-09-02      |
| hCoV-19/Japan/PG-76735/2021 | EPI_ISL_3886862 | 2021-09-02      |
| hCoV-19/Japan/PG-76736/2021 | EPI_ISL_3886865 | 2021-09-02      |
| hCoV-19/Japan/PG-76737/2021 | EPI_ISL_3886867 | 2021-09-02      |
| hCoV-19/Japan/PG-76738/2021 | EPI_ISL_3886870 | 2021-09-02      |
| hCoV-19/Japan/PG-76739/2021 | EPI_ISL_3886872 | 2021-09-02      |
| hCoV-19/Japan/PG-76740/2021 | EPI_ISL_3886874 | 2021-09-02      |
| hCoV-19/Japan/PG-76741/2021 | EPI_ISL_3886876 | 2021-09-02      |
| hCoV-19/Japan/PG-76742/2021 | EPI_ISL_3886878 | 2021-09-02      |
| hCoV-19/Japan/PG-76743/2021 | EPI_ISL_3886879 | 2021-09-02      |
| hCoV-19/Japan/PG-76744/2021 | EPI_ISL_3886882 | 2021-09-02      |
| hCoV-19/Japan/PG-76745/2021 | EPI_ISL_3886884 | 2021-09-02      |
| hCoV-19/Japan/PG-76746/2021 | EPI_ISL_3886885 | 2021-09-02      |



| virus_name                  | epiID           | submission_date |
|-----------------------------|-----------------|-----------------|
| hCoV-19/Japan/PG-76747/2021 | EPI_ISL_3886886 | 2021-09-02      |
| hCoV-19/Japan/PG-76748/2021 | EPI_ISL_3886888 | 2021-09-02      |
| hCoV-19/Japan/PG-76749/2021 | EPI_ISL_3886890 | 2021-09-02      |
| hCoV-19/Japan/PG-76750/2021 | EPI_ISL_3886892 | 2021-09-02      |
| hCoV-19/Japan/PG-76751/2021 | EPI_ISL_3886893 | 2021-09-02      |
| hCoV-19/Japan/PG-76752/2021 | EPI_ISL_3886895 | 2021-09-02      |
| hCoV-19/Japan/PG-76753/2021 | EPI_ISL_3886897 | 2021-09-02      |
| hCoV-19/Japan/PG-76754/2021 | EPI_ISL_3886898 | 2021-09-02      |
| hCoV-19/Japan/PG-76755/2021 | EPI_ISL_3886900 | 2021-09-02      |
| hCoV-19/Japan/PG-76756/2021 | EPI_ISL_3886901 | 2021-09-02      |
| hCoV-19/Japan/PG-76757/2021 | EPI_ISL_3886903 | 2021-09-02      |
| hCoV-19/Japan/PG-76758/2021 | EPI_ISL_3886905 | 2021-09-02      |
| hCoV-19/Japan/PG-76759/2021 | EPI_ISL_3886907 | 2021-09-02      |
| hCoV-19/Japan/PG-76760/2021 | EPI_ISL_3886909 | 2021-09-02      |
| hCoV-19/Japan/PG-76761/2021 | EPI_ISL_3886912 | 2021-09-02      |
| hCoV-19/Japan/PG-76762/2021 | EPI_ISL_3886913 | 2021-09-02      |
| hCoV-19/Japan/PG-76763/2021 | EPI_ISL_3886915 | 2021-09-02      |
| hCoV-19/Japan/PG-76764/2021 | EPI_ISL_3886918 | 2021-09-02      |
| hCoV-19/Japan/PG-76765/2021 | EPI_ISL_3886920 | 2021-09-02      |
| hCoV-19/Japan/PG-76766/2021 | EPI_ISL_3886922 | 2021-09-02      |
| hCoV-19/Japan/PG-76767/2021 | EPI_ISL_3886924 | 2021-09-02      |
| hCoV-19/Japan/PG-76768/2021 | EPI_ISL_3886925 | 2021-09-02      |
| hCoV-19/Japan/PG-76769/2021 | EPI_ISL_3886926 | 2021-09-02      |
| hCoV-19/Japan/PG-76770/2021 | EPI_ISL_3886927 | 2021-09-02      |
| hCoV-19/Japan/PG-76771/2021 | EPI_ISL_3886928 | 2021-09-02      |
| hCoV-19/Japan/PG-76772/2021 | EPI_ISL_3886929 | 2021-09-02      |
| hCoV-19/Japan/PG-76773/2021 | EPI_ISL_3886931 | 2021-09-02      |
| hCoV-19/Japan/PG-76774/2021 | EPI_ISL_3886933 | 2021-09-02      |
| hCoV-19/Japan/PG-76775/2021 | EPI_ISL_3886935 | 2021-09-02      |
| hCoV-19/Japan/PG-76776/2021 | EPI_ISL_3886938 | 2021-09-02      |
| hCoV-19/Japan/PG-76777/2021 | EPI_ISL_3886940 | 2021-09-02      |
| hCoV-19/Japan/PG-76778/2021 | EPI_ISL_3886942 | 2021-09-02      |
| hCoV-19/Japan/PG-76779/2021 | EPI_ISL_3886944 | 2021-09-02      |
| hCoV-19/Japan/PG-76780/2021 | EPI_ISL_3886945 | 2021-09-02      |
| hCoV-19/Japan/PG-76781/2021 | EPI_ISL_3886948 | 2021-09-02      |
| hCoV-19/Japan/PG-76782/2021 | EPI_ISL_3886950 | 2021-09-02      |
| hCoV-19/Japan/PG-76783/2021 | EPI_ISL_3886952 | 2021-09-02      |
| hCoV-19/Japan/PG-76784/2021 | EPI_ISL_3886954 | 2021-09-02      |
| hCoV-19/Japan/PG-76785/2021 | EPI_ISL_3886955 | 2021-09-02      |
| hCoV-19/Japan/PG-76786/2021 | EPI_ISL_3886956 | 2021-09-02      |
| hCoV-19/Japan/PG-76787/2021 | EPI_ISL_3886957 | 2021-09-02      |
| hCoV-19/Japan/PG-76788/2021 | EPI_ISL_3886958 | 2021-09-02      |
| hCoV-19/Japan/PG-76789/2021 | EPI_ISL_3886959 | 2021-09-02      |
| hCoV-19/Japan/PG-76790/2021 | EPI_ISL_3886961 | 2021-09-02      |
| hCoV-19/Japan/PG-76791/2021 | EPI_ISL_3886962 | 2021-09-02      |
| hCoV-19/Japan/PG-76792/2021 | EPI_ISL_3886964 | 2021-09-02      |
| hCoV-19/Japan/PG-76793/2021 | EPI_ISL_3886966 | 2021-09-02      |
| hCoV-19/Japan/PG-76794/2021 | EPI_ISL_3886967 | 2021-09-02      |
| hCoV-19/Japan/PG-76795/2021 | EPI_ISL_3886969 | 2021-09-02      |
| hCoV-19/Japan/PG-76796/2021 | EPI_ISL_3886970 | 2021-09-02      |
| hCoV-19/Japan/PG-76797/2021 | EPI_ISL_3886972 | 2021-09-02      |
| hCoV-19/Japan/PG-76798/2021 | EPI_ISL_3886973 | 2021-09-02      |
| hCoV-19/Japan/PG-76799/2021 | EPI_ISL_3886975 | 2021-09-02      |
| hCoV-19/Japan/PG-76800/2021 | EPI_ISL_3886978 | 2021-09-02      |

| virus_name                  | epiID           | submission_date |
|-----------------------------|-----------------|-----------------|
| hCoV-19/Japan/PG-76801/2021 | EPI_ISL_3886980 | 2021-09-02      |
| hCoV-19/Japan/PG-76802/2021 | EPI_ISL_3886982 | 2021-09-02      |
| hCoV-19/Japan/PG-76803/2021 | EPI_ISL_3886984 | 2021-09-02      |
| hCoV-19/Japan/PG-76804/2021 | EPI_ISL_3886986 | 2021-09-02      |
| hCoV-19/Japan/PG-76805/2021 | EPI_ISL_3886988 | 2021-09-02      |
| hCoV-19/Japan/PG-76806/2021 | EPI_ISL_3886990 | 2021-09-02      |
| hCoV-19/Japan/PG-76807/2021 | EPI_ISL_3886992 | 2021-09-02      |
| hCoV-19/Japan/PG-76808/2021 | EPI_ISL_3886993 | 2021-09-02      |
| hCoV-19/Japan/PG-76809/2021 | EPI_ISL_3886995 | 2021-09-02      |
| hCoV-19/Japan/PG-76810/2021 | EPI_ISL_3886998 | 2021-09-02      |
| hCoV-19/Japan/PG-76811/2021 | EPI_ISL_3886999 | 2021-09-02      |
| hCoV-19/Japan/PG-76812/2021 | EPI_ISL_3887000 | 2021-09-02      |
| hCoV-19/Japan/PG-76813/2021 | EPI_ISL_3887001 | 2021-09-02      |
| hCoV-19/Japan/PG-76814/2021 | EPI_ISL_3887003 | 2021-09-02      |
| hCoV-19/Japan/PG-76815/2021 | EPI_ISL_3887005 | 2021-09-02      |
| hCoV-19/Japan/PG-76816/2021 | EPI_ISL_3887007 | 2021-09-02      |
| hCoV-19/Japan/PG-76817/2021 | EPI_ISL_3887009 | 2021-09-02      |
| hCoV-19/Japan/PG-76818/2021 | EPI_ISL_3887012 | 2021-09-02      |
| hCoV-19/Japan/PG-76819/2021 | EPI_ISL_3887014 | 2021-09-02      |
| hCoV-19/Japan/PG-76820/2021 | EPI_ISL_3887017 | 2021-09-02      |
| hCoV-19/Japan/PG-76821/2021 | EPI_ISL_3887019 | 2021-09-02      |
| hCoV-19/Japan/PG-76822/2021 | EPI_ISL_3887021 | 2021-09-02      |
| hCoV-19/Japan/PG-76823/2021 | EPI_ISL_3887023 | 2021-09-02      |
| hCoV-19/Japan/PG-76824/2021 | EPI_ISL_3887026 | 2021-09-02      |
| hCoV-19/Japan/PG-76825/2021 | EPI_ISL_3887029 | 2021-09-02      |
| hCoV-19/Japan/PG-76826/2021 | EPI_ISL_3887031 | 2021-09-02      |
| hCoV-19/Japan/PG-76827/2021 | EPI_ISL_3887034 | 2021-09-02      |
| hCoV-19/Japan/PG-76828/2021 | EPI_ISL_3887036 | 2021-09-02      |
| hCoV-19/Japan/PG-76829/2021 | EPI_ISL_3887038 | 2021-09-02      |
| hCoV-19/Japan/PG-76830/2021 | EPI_ISL_3887040 | 2021-09-02      |
| hCoV-19/Japan/PG-76831/2021 | EPI_ISL_3887042 | 2021-09-02      |
| hCoV-19/Japan/PG-76832/2021 | EPI_ISL_3887044 | 2021-09-02      |
| hCoV-19/Japan/PG-76833/2021 | EPI_ISL_3887046 | 2021-09-02      |
| hCoV-19/Japan/PG-76834/2021 | EPI_ISL_3887048 | 2021-09-02      |
| hCoV-19/Japan/PG-76835/2021 | EPI_ISL_3887050 | 2021-09-02      |
| hCoV-19/Japan/PG-76836/2021 | EPI_ISL_3887052 | 2021-09-02      |
| hCoV-19/Japan/PG-76837/2021 | EPI_ISL_3887054 | 2021-09-02      |
| hCoV-19/Japan/PG-76838/2021 | EPI_ISL_3887057 | 2021-09-02      |
| hCoV-19/Japan/PG-76839/2021 | EPI_ISL_3887059 | 2021-09-02      |
| hCoV-19/Japan/PG-76840/2021 | EPI_ISL_3887060 | 2021-09-02      |
| hCoV-19/Japan/PG-76841/2021 | EPI_ISL_3887061 | 2021-09-02      |
| hCoV-19/Japan/PG-76842/2021 | EPI_ISL_3887063 | 2021-09-02      |
| hCoV-19/Japan/PG-76843/2021 | EPI_ISL_3887066 | 2021-09-02      |
| hCoV-19/Japan/PG-76844/2021 | EPI_ISL_3887068 | 2021-09-02      |
| hCoV-19/Japan/PG-76845/2021 | EPI_ISL_3887070 | 2021-09-02      |
| hCoV-19/Japan/PG-76846/2021 | EPI_ISL_3887072 | 2021-09-02      |
| hCoV-19/Japan/PG-76847/2021 | EPI_ISL_3887073 | 2021-09-02      |
| hCoV-19/Japan/PG-76848/2021 | EPI_ISL_3887075 | 2021-09-02      |
| hCoV-19/Japan/PG-76849/2021 | EPI_ISL_3887078 | 2021-09-02      |
| hCoV-19/Japan/PG-76850/2021 | EPI_ISL_3887079 | 2021-09-02      |
| hCoV-19/Japan/PG-76851/2021 | EPI_ISL_3887082 | 2021-09-02      |
| hCoV-19/Japan/PG-76852/2021 | EPI_ISL_3887083 | 2021-09-02      |
| hCoV-19/Japan/PG-76853/2021 | EPI_ISL_3887085 | 2021-09-02      |
| hCoV-19/Japan/PG-76854/2021 | EPI_ISL_3887087 | 2021-09-02      |

| virus_name                  | epiID           | submission_date |
|-----------------------------|-----------------|-----------------|
| hCoV-19/Japan/PG-76855/2021 | EPI_ISL_3887090 | 2021-09-02      |
| hCoV-19/Japan/PG-76856/2021 | EPI_ISL_3887092 | 2021-09-02      |
| hCoV-19/Japan/PG-76857/2021 | EPI_ISL_3887094 | 2021-09-02      |
| hCoV-19/Japan/PG-76858/2021 | EPI_ISL_3887096 | 2021-09-02      |
| hCoV-19/Japan/PG-76859/2021 | EPI_ISL_3887099 | 2021-09-02      |
| hCoV-19/Japan/PG-76860/2021 | EPI_ISL_3887100 | 2021-09-02      |
| hCoV-19/Japan/PG-76861/2021 | EPI_ISL_3887102 | 2021-09-02      |
| hCoV-19/Japan/PG-76862/2021 | EPI_ISL_3887104 | 2021-09-02      |
| hCoV-19/Japan/PG-76863/2021 | EPI_ISL_3887106 | 2021-09-02      |
| hCoV-19/Japan/PG-76864/2021 | EPI_ISL_3887109 | 2021-09-02      |
| hCoV-19/Japan/PG-76865/2021 | EPI_ISL_3887111 | 2021-09-02      |
| hCoV-19/Japan/PG-76866/2021 | EPI_ISL_3887113 | 2021-09-02      |
| hCoV-19/Japan/PG-76867/2021 | EPI_ISL_3887115 | 2021-09-02      |
| hCoV-19/Japan/PG-76868/2021 | EPI_ISL_3887117 | 2021-09-02      |
| hCoV-19/Japan/PG-76869/2021 | EPI_ISL_3887120 | 2021-09-02      |
| hCoV-19/Japan/PG-76870/2021 | EPI_ISL_3887121 | 2021-09-02      |
| hCoV-19/Japan/PG-76871/2021 | EPI_ISL_3887123 | 2021-09-02      |
| hCoV-19/Japan/PG-76872/2021 | EPI_ISL_3887125 | 2021-09-02      |
| hCoV-19/Japan/PG-76873/2021 | EPI_ISL_3887127 | 2021-09-02      |
| hCoV-19/Japan/PG-76874/2021 | EPI_ISL_3887129 | 2021-09-02      |
| hCoV-19/Japan/PG-76875/2021 | EPI_ISL_3887130 | 2021-09-02      |
| hCoV-19/Japan/PG-76876/2021 | EPI_ISL_3887133 | 2021-09-02      |
| hCoV-19/Japan/PG-76877/2021 | EPI_ISL_3887135 | 2021-09-02      |
| hCoV-19/Japan/PG-76878/2021 | EPI_ISL_3887138 | 2021-09-02      |
| hCoV-19/Japan/PG-76879/2021 | EPI_ISL_3887139 | 2021-09-02      |
| hCoV-19/Japan/PG-76880/2021 | EPI_ISL_3887140 | 2021-09-02      |
| hCoV-19/Japan/PG-76881/2021 | EPI_ISL_3887141 | 2021-09-02      |
| hCoV-19/Japan/PG-76882/2021 | EPI_ISL_3887143 | 2021-09-02      |
| hCoV-19/Japan/PG-76883/2021 | EPI_ISL_3887145 | 2021-09-02      |
| hCoV-19/Japan/PG-76884/2021 | EPI_ISL_3887148 | 2021-09-02      |
| hCoV-19/Japan/PG-76885/2021 | EPI_ISL_3887150 | 2021-09-02      |
| hCoV-19/Japan/PG-76886/2021 | EPI_ISL_3887152 | 2021-09-02      |
| hCoV-19/Japan/PG-76887/2021 | EPI_ISL_3887154 | 2021-09-02      |
| hCoV-19/Japan/PG-76888/2021 | EPI_ISL_3887156 | 2021-09-02      |
| hCoV-19/Japan/PG-76889/2021 | EPI_ISL_3887158 | 2021-09-02      |
| hCoV-19/Japan/PG-76890/2021 | EPI_ISL_3887161 | 2021-09-02      |
| hCoV-19/Japan/PG-76891/2021 | EPI_ISL_3887163 | 2021-09-02      |
| hCoV-19/Japan/PG-76892/2021 | EPI_ISL_3887166 | 2021-09-02      |
| hCoV-19/Japan/PG-76893/2021 | EPI_ISL_3887167 | 2021-09-02      |
| hCoV-19/Japan/PG-76894/2021 | EPI_ISL_3887169 | 2021-09-02      |
| hCoV-19/Japan/PG-76895/2021 | EPI_ISL_3887172 | 2021-09-02      |
| hCoV-19/Japan/PG-76896/2021 | EPI_ISL_3887174 | 2021-09-02      |
| hCoV-19/Japan/PG-76897/2021 | EPI_ISL_3887176 | 2021-09-02      |
| hCoV-19/Japan/PG-76898/2021 | EPI_ISL_3887178 | 2021-09-02      |
| hCoV-19/Japan/PG-76899/2021 | EPI_ISL_3887180 | 2021-09-02      |
| hCoV-19/Japan/PG-76900/2021 | EPI_ISL_3887182 | 2021-09-02      |
| hCoV-19/Japan/PG-76901/2021 | EPI_ISL_3887184 | 2021-09-02      |
| hCoV-19/Japan/PG-76902/2021 | EPI_ISL_3887187 | 2021-09-02      |
| hCoV-19/Japan/PG-76903/2021 | EPI_ISL_3887189 | 2021-09-02      |
| hCoV-19/Japan/PG-76904/2021 | EPI_ISL_3887191 | 2021-09-02      |
| hCoV-19/Japan/PG-76905/2021 | EPI_ISL_3887193 | 2021-09-02      |
| hCoV-19/Japan/PG-76906/2021 | EPI_ISL_3887195 | 2021-09-02      |
| hCoV-19/Japan/PG-76907/2021 | EPI_ISL_3887197 | 2021-09-02      |
| hCoV-19/Japan/PG-76908/2021 | EPI_ISL_3887199 | 2021-09-02      |

| virus_name                  | epiID           | submission_date |
|-----------------------------|-----------------|-----------------|
| hCoV-19/Japan/PG-76909/2021 | EPI_ISL_3887201 | 2021-09-02      |
| hCoV-19/Japan/PG-76910/2021 | EPI_ISL_3887204 | 2021-09-02      |
| hCoV-19/Japan/PG-76911/2021 | EPI_ISL_3887206 | 2021-09-02      |
| hCoV-19/Japan/PG-76912/2021 | EPI_ISL_3887207 | 2021-09-02      |
| hCoV-19/Japan/PG-76913/2021 | EPI_ISL_3887209 | 2021-09-02      |
| hCoV-19/Japan/PG-76914/2021 | EPI_ISL_3887211 | 2021-09-02      |
| hCoV-19/Japan/PG-76915/2021 | EPI_ISL_3887212 | 2021-09-02      |
| hCoV-19/Japan/PG-76916/2021 | EPI_ISL_3887214 | 2021-09-02      |
| hCoV-19/Japan/PG-76917/2021 | EPI_ISL_3887216 | 2021-09-02      |
| hCoV-19/Japan/PG-76918/2021 | EPI_ISL_3887218 | 2021-09-02      |
| hCoV-19/Japan/PG-76919/2021 | EPI_ISL_3887220 | 2021-09-02      |
| hCoV-19/Japan/PG-76920/2021 | EPI_ISL_3887222 | 2021-09-02      |
| hCoV-19/Japan/PG-76921/2021 | EPI_ISL_3887225 | 2021-09-02      |
| hCoV-19/Japan/PG-76922/2021 | EPI_ISL_3887227 | 2021-09-02      |
| hCoV-19/Japan/PG-76923/2021 | EPI_ISL_3887229 | 2021-09-02      |
| hCoV-19/Japan/PG-76924/2021 | EPI_ISL_3887231 | 2021-09-02      |
| hCoV-19/Japan/PG-76925/2021 | EPI_ISL_3887233 | 2021-09-02      |
| hCoV-19/Japan/PG-76926/2021 | EPI_ISL_3887236 | 2021-09-02      |
| hCoV-19/Japan/PG-76927/2021 | EPI_ISL_3887237 | 2021-09-02      |
| hCoV-19/Japan/PG-76928/2021 | EPI_ISL_3887238 | 2021-09-02      |
| hCoV-19/Japan/PG-76929/2021 | EPI_ISL_3887240 | 2021-09-02      |
| hCoV-19/Japan/PG-76930/2021 | EPI_ISL_3887242 | 2021-09-02      |
| hCoV-19/Japan/PG-76931/2021 | EPI_ISL_3887245 | 2021-09-02      |
| hCoV-19/Japan/PG-76932/2021 | EPI_ISL_3887247 | 2021-09-02      |
| hCoV-19/Japan/PG-76933/2021 | EPI_ISL_3887249 | 2021-09-02      |
| hCoV-19/Japan/PG-76934/2021 | EPI_ISL_3887251 | 2021-09-02      |
| hCoV-19/Japan/PG-76935/2021 | EPI_ISL_3887257 | 2021-09-02      |
| hCoV-19/Japan/PG-76936/2021 | EPI_ISL_3887259 | 2021-09-02      |
| hCoV-19/Japan/PG-76937/2021 | EPI_ISL_3887261 | 2021-09-02      |
| hCoV-19/Japan/PG-76938/2021 | EPI_ISL_3887262 | 2021-09-02      |
| hCoV-19/Japan/PG-76939/2021 | EPI_ISL_3887264 | 2021-09-02      |
| hCoV-19/Japan/PG-76940/2021 | EPI_ISL_3887266 | 2021-09-02      |
| hCoV-19/Japan/PG-76941/2021 | EPI_ISL_3887268 | 2021-09-02      |
| hCoV-19/Japan/PG-76942/2021 | EPI_ISL_3887271 | 2021-09-02      |
| hCoV-19/Japan/PG-76943/2021 | EPI_ISL_3887273 | 2021-09-02      |
| hCoV-19/Japan/PG-76944/2021 | EPI_ISL_3887275 | 2021-09-02      |
| hCoV-19/Japan/PG-76945/2021 | EPI_ISL_3887276 | 2021-09-02      |
| hCoV-19/Japan/PG-76946/2021 | EPI_ISL_3887278 | 2021-09-02      |
| hCoV-19/Japan/PG-76947/2021 | EPI_ISL_3887281 | 2021-09-02      |
| hCoV-19/Japan/PG-76948/2021 | EPI_ISL_3887283 | 2021-09-02      |
| hCoV-19/Japan/PG-76949/2021 | EPI_ISL_3887285 | 2021-09-02      |
| hCoV-19/Japan/PG-76950/2021 | EPI_ISL_3887287 | 2021-09-02      |
| hCoV-19/Japan/PG-76951/2021 | EPI_ISL_3887289 | 2021-09-02      |
| hCoV-19/Japan/PG-76952/2021 | EPI_ISL_3887291 | 2021-09-02      |
| hCoV-19/Japan/PG-76953/2021 | EPI_ISL_3887292 | 2021-09-02      |
| hCoV-19/Japan/PG-76954/2021 | EPI_ISL_3887293 | 2021-09-02      |
| hCoV-19/Japan/PG-76955/2021 | EPI_ISL_3887295 | 2021-09-02      |
| hCoV-19/Japan/PG-76956/2021 | EPI_ISL_3887296 | 2021-09-02      |
| hCoV-19/Japan/PG-76957/2021 | EPI_ISL_3887298 | 2021-09-02      |
| hCoV-19/Japan/PG-76958/2021 | EPI_ISL_3887300 | 2021-09-02      |
| hCoV-19/Japan/PG-76959/2021 | EPI_ISL_3887301 | 2021-09-02      |
| hCoV-19/Japan/PG-76960/2021 | EPI_ISL_3887304 | 2021-09-02      |
| hCoV-19/Japan/PG-76961/2021 | EPI_ISL_3887305 | 2021-09-02      |
| hCoV-19/Japan/PG-76962/2021 | EPI_ISL_3887308 | 2021-09-02      |

| virus_name                  | epiID           | submission_date |
|-----------------------------|-----------------|-----------------|
| hCoV-19/Japan/PG-76963/2021 | EPI_ISL_3887309 | 2021-09-02      |
| hCoV-19/Japan/PG-76964/2021 | EPI_ISL_3887311 | 2021-09-02      |
| hCoV-19/Japan/PG-76965/2021 | EPI_ISL_3887312 | 2021-09-02      |
| hCoV-19/Japan/PG-76966/2021 | EPI_ISL_3887314 | 2021-09-02      |
| hCoV-19/Japan/PG-76967/2021 | EPI_ISL_3887316 | 2021-09-02      |
| hCoV-19/Japan/PG-76968/2021 | EPI_ISL_3887318 | 2021-09-02      |
| hCoV-19/Japan/PG-76969/2021 | EPI_ISL_3887320 | 2021-09-02      |
| hCoV-19/Japan/PG-76970/2021 | EPI_ISL_3887322 | 2021-09-02      |
| hCoV-19/Japan/PG-76971/2021 | EPI_ISL_3887323 | 2021-09-02      |
| hCoV-19/Japan/PG-76972/2021 | EPI_ISL_3887325 | 2021-09-02      |
| hCoV-19/Japan/PG-76973/2021 | EPI_ISL_3887326 | 2021-09-02      |
| hCoV-19/Japan/PG-76974/2021 | EPI_ISL_3887327 | 2021-09-02      |
| hCoV-19/Japan/PG-76975/2021 | EPI_ISL_3887328 | 2021-09-02      |
| hCoV-19/Japan/PG-76976/2021 | EPI_ISL_3887330 | 2021-09-02      |
| hCoV-19/Japan/PG-76977/2021 | EPI_ISL_3887332 | 2021-09-02      |
| hCoV-19/Japan/PG-76978/2021 | EPI_ISL_3887333 | 2021-09-02      |
| hCoV-19/Japan/PG-76979/2021 | EPI_ISL_3887335 | 2021-09-02      |
| hCoV-19/Japan/PG-76980/2021 | EPI_ISL_3887336 | 2021-09-02      |
| hCoV-19/Japan/PG-76981/2021 | EPI_ISL_3887337 | 2021-09-02      |
| hCoV-19/Japan/PG-76982/2021 | EPI_ISL_3887338 | 2021-09-02      |
| hCoV-19/Japan/PG-76983/2021 | EPI_ISL_3887339 | 2021-09-02      |
| hCoV-19/Japan/PG-76984/2021 | EPI_ISL_3887341 | 2021-09-02      |
| hCoV-19/Japan/PG-76985/2021 | EPI_ISL_3887342 | 2021-09-02      |
| hCoV-19/Japan/PG-76986/2021 | EPI_ISL_3887344 | 2021-09-02      |
| hCoV-19/Japan/PG-76987/2021 | EPI_ISL_3887346 | 2021-09-02      |
| hCoV-19/Japan/PG-76988/2021 | EPI_ISL_3887347 | 2021-09-02      |
| hCoV-19/Japan/PG-76989/2021 | EPI_ISL_3887348 | 2021-09-02      |
| hCoV-19/Japan/PG-76990/2021 | EPI_ISL_3887349 | 2021-09-02      |
| hCoV-19/Japan/PG-76991/2021 | EPI_ISL_3887350 | 2021-09-02      |
| hCoV-19/Japan/PG-76992/2021 | EPI_ISL_3887351 | 2021-09-02      |
| hCoV-19/Japan/PG-76993/2021 | EPI_ISL_3887352 | 2021-09-02      |
| hCoV-19/Japan/PG-76994/2021 | EPI_ISL_3887354 | 2021-09-02      |
| hCoV-19/Japan/PG-76995/2021 | EPI_ISL_3887356 | 2021-09-02      |
| hCoV-19/Japan/PG-76996/2021 | EPI_ISL_3887357 | 2021-09-02      |
| hCoV-19/Japan/PG-76997/2021 | EPI_ISL_3887359 | 2021-09-02      |
| hCoV-19/Japan/PG-76998/2021 | EPI_ISL_3887361 | 2021-09-02      |
| hCoV-19/Japan/PG-76999/2021 | EPI_ISL_3887363 | 2021-09-02      |
| hCoV-19/Japan/PG-77000/2021 | EPI_ISL_3887364 | 2021-09-02      |
| hCoV-19/Japan/PG-77001/2021 | EPI_ISL_3887366 | 2021-09-02      |
| hCoV-19/Japan/PG-77002/2021 | EPI_ISL_3887368 | 2021-09-02      |
| hCoV-19/Japan/PG-77003/2021 | EPI_ISL_3887369 | 2021-09-02      |
| hCoV-19/Japan/PG-77004/2021 | EPI_ISL_3887370 | 2021-09-02      |
| hCoV-19/Japan/PG-77005/2021 | EPI_ISL_3887372 | 2021-09-02      |
| hCoV-19/Japan/PG-77006/2021 | EPI_ISL_3887374 | 2021-09-02      |
| hCoV-19/Japan/PG-77007/2021 | EPI_ISL_3887376 | 2021-09-02      |
| hCoV-19/Japan/PG-77008/2021 | EPI_ISL_3887377 | 2021-09-02      |
| hCoV-19/Japan/PG-77009/2021 | EPI_ISL_3887380 | 2021-09-02      |
| hCoV-19/Japan/PG-77010/2021 | EPI_ISL_3887381 | 2021-09-02      |
| hCoV-19/Japan/PG-77011/2021 | EPI_ISL_3887383 | 2021-09-02      |
| hCoV-19/Japan/PG-77012/2021 | EPI_ISL_3887385 | 2021-09-02      |
| hCoV-19/Japan/PG-77013/2021 | EPI_ISL_3887386 | 2021-09-02      |
| hCoV-19/Japan/PG-77014/2021 | EPI_ISL_3887388 | 2021-09-02      |
| hCoV-19/Japan/PG-77015/2021 | EPI_ISL_3887389 | 2021-09-02      |
| hCoV-19/Japan/PG-77016/2021 | EPI_ISL_3887391 | 2021-09-02      |

| virus_name                  | epiID           | submission_date |
|-----------------------------|-----------------|-----------------|
| hCoV-19/Japan/PG-77017/2021 | EPI_ISL_3887392 | 2021-09-02      |
| hCoV-19/Japan/PG-77018/2021 | EPI_ISL_3887394 | 2021-09-02      |
| hCoV-19/Japan/PG-77019/2021 | EPI_ISL_3887396 | 2021-09-02      |
| hCoV-19/Japan/PG-77020/2021 | EPI_ISL_3887398 | 2021-09-02      |
| hCoV-19/Japan/PG-77021/2021 | EPI_ISL_3887399 | 2021-09-02      |
| hCoV-19/Japan/PG-77022/2021 | EPI_ISL_3887401 | 2021-09-02      |
| hCoV-19/Japan/PG-77023/2021 | EPI_ISL_3887403 | 2021-09-02      |
| hCoV-19/Japan/PG-77024/2021 | EPI_ISL_3887405 | 2021-09-02      |
| hCoV-19/Japan/PG-77025/2021 | EPI_ISL_3887406 | 2021-09-02      |
| hCoV-19/Japan/PG-77026/2021 | EPI_ISL_3887407 | 2021-09-02      |
| hCoV-19/Japan/PG-77027/2021 | EPI_ISL_3887408 | 2021-09-02      |
| hCoV-19/Japan/PG-77028/2021 | EPI_ISL_3887409 | 2021-09-02      |
| hCoV-19/Japan/PG-77029/2021 | EPI_ISL_3887410 | 2021-09-02      |
| hCoV-19/Japan/PG-77030/2021 | EPI_ISL_3887411 | 2021-09-02      |
| hCoV-19/Japan/PG-77031/2021 | EPI_ISL_3887412 | 2021-09-02      |
| hCoV-19/Japan/PG-77032/2021 | EPI_ISL_3887414 | 2021-09-02      |
| hCoV-19/Japan/PG-77033/2021 | EPI_ISL_3887415 | 2021-09-02      |
| hCoV-19/Japan/PG-77034/2021 | EPI_ISL_3887417 | 2021-09-02      |
| hCoV-19/Japan/PG-77035/2021 | EPI_ISL_3887419 | 2021-09-02      |
| hCoV-19/Japan/PG-77036/2021 | EPI_ISL_3887420 | 2021-09-02      |
| hCoV-19/Japan/PG-77037/2021 | EPI_ISL_3887422 | 2021-09-02      |
| hCoV-19/Japan/PG-77038/2021 | EPI_ISL_3887424 | 2021-09-02      |
| hCoV-19/Japan/PG-77039/2021 | EPI_ISL_3887425 | 2021-09-02      |
| hCoV-19/Japan/PG-77040/2021 | EPI_ISL_3887426 | 2021-09-02      |
| hCoV-19/Japan/PG-77041/2021 | EPI_ISL_3887428 | 2021-09-02      |
| hCoV-19/Japan/PG-77042/2021 | EPI_ISL_3887430 | 2021-09-02      |
| hCoV-19/Japan/PG-77043/2021 | EPI_ISL_3887431 | 2021-09-02      |
| hCoV-19/Japan/PG-77044/2021 | EPI_ISL_3887432 | 2021-09-02      |
| hCoV-19/Japan/PG-77045/2021 | EPI_ISL_3887434 | 2021-09-02      |
| hCoV-19/Japan/PG-77046/2021 | EPI_ISL_3887435 | 2021-09-02      |
| hCoV-19/Japan/PG-77047/2021 | EPI_ISL_3887437 | 2021-09-02      |
| hCoV-19/Japan/PG-77048/2021 | EPI_ISL_3887439 | 2021-09-02      |
| hCoV-19/Japan/PG-77049/2021 | EPI_ISL_3887441 | 2021-09-02      |
| hCoV-19/Japan/PG-77050/2021 | EPI_ISL_3887442 | 2021-09-02      |
| hCoV-19/Japan/PG-77051/2021 | EPI_ISL_3887444 | 2021-09-02      |
| hCoV-19/Japan/PG-77052/2021 | EPI_ISL_3887446 | 2021-09-02      |
| hCoV-19/Japan/PG-77053/2021 | EPI_ISL_3887448 | 2021-09-02      |
| hCoV-19/Japan/PG-77054/2021 | EPI_ISL_3887449 | 2021-09-02      |
| hCoV-19/Japan/PG-77055/2021 | EPI_ISL_3887451 | 2021-09-02      |
| hCoV-19/Japan/PG-77056/2021 | EPI_ISL_3887453 | 2021-09-02      |
| hCoV-19/Japan/PG-77057/2021 | EPI_ISL_3887455 | 2021-09-02      |
| hCoV-19/Japan/PG-77058/2021 | EPI_ISL_3887456 | 2021-09-02      |
| hCoV-19/Japan/PG-77059/2021 | EPI_ISL_3887458 | 2021-09-02      |
| hCoV-19/Japan/PG-77060/2021 | EPI_ISL_3887459 | 2021-09-02      |
| hCoV-19/Japan/PG-77061/2021 | EPI_ISL_3887460 | 2021-09-02      |
| hCoV-19/Japan/PG-77062/2021 | EPI_ISL_3887461 | 2021-09-02      |
| hCoV-19/Japan/PG-77063/2021 | EPI_ISL_3887463 | 2021-09-02      |
| hCoV-19/Japan/PG-77064/2021 | EPI_ISL_3887464 | 2021-09-02      |
| hCoV-19/Japan/PG-77065/2021 | EPI_ISL_3887466 | 2021-09-02      |
| hCoV-19/Japan/PG-77066/2021 | EPI_ISL_3887468 | 2021-09-02      |
| hCoV-19/Japan/PG-77067/2021 | EPI_ISL_3887470 | 2021-09-02      |
| hCoV-19/Japan/PG-77068/2021 | EPI_ISL_3887472 | 2021-09-02      |
| hCoV-19/Japan/PG-77069/2021 | EPI_ISL_3887473 | 2021-09-02      |
| hCoV-19/Japan/PG-77070/2021 | EPI_ISL_3887475 | 2021-09-02      |

| virus_name                  | epiID           | submission_date |
|-----------------------------|-----------------|-----------------|
| hCoV-19/Japan/PG-77071/2021 | EPI_ISL_3887477 | 2021-09-02      |
| hCoV-19/Japan/PG-77072/2021 | EPI_ISL_3887480 | 2021-09-02      |
| hCoV-19/Japan/PG-77073/2021 | EPI_ISL_3887481 | 2021-09-02      |
| hCoV-19/Japan/PG-77074/2021 | EPI_ISL_3887482 | 2021-09-02      |
| hCoV-19/Japan/PG-77075/2021 | EPI_ISL_3887483 | 2021-09-02      |
| hCoV-19/Japan/PG-77076/2021 | EPI_ISL_3887484 | 2021-09-02      |
| hCoV-19/Japan/PG-77077/2021 | EPI_ISL_3887485 | 2021-09-02      |
| hCoV-19/Japan/PG-77078/2021 | EPI_ISL_3887487 | 2021-09-02      |
| hCoV-19/Japan/PG-77079/2021 | EPI_ISL_3887488 | 2021-09-02      |
| hCoV-19/Japan/PG-77080/2021 | EPI_ISL_3887490 | 2021-09-02      |
| hCoV-19/Japan/PG-77081/2021 | EPI_ISL_3887492 | 2021-09-02      |
| hCoV-19/Japan/PG-77082/2021 | EPI_ISL_3887494 | 2021-09-02      |
| hCoV-19/Japan/PG-77083/2021 | EPI_ISL_3887496 | 2021-09-02      |
| hCoV-19/Japan/PG-77084/2021 | EPI_ISL_3887498 | 2021-09-02      |
| hCoV-19/Japan/PG-77085/2021 | EPI_ISL_3887499 | 2021-09-02      |
| hCoV-19/Japan/PG-77086/2021 | EPI_ISL_3887500 | 2021-09-02      |
| hCoV-19/Japan/PG-77087/2021 | EPI_ISL_3887502 | 2021-09-02      |
| hCoV-19/Japan/PG-77088/2021 | EPI_ISL_3887503 | 2021-09-02      |
| hCoV-19/Japan/PG-77089/2021 | EPI_ISL_3887504 | 2021-09-02      |
| hCoV-19/Japan/PG-77090/2021 | EPI_ISL_3887506 | 2021-09-02      |
| hCoV-19/Japan/PG-77091/2021 | EPI_ISL_3887507 | 2021-09-02      |
| hCoV-19/Japan/PG-77092/2021 | EPI_ISL_3887509 | 2021-09-02      |
| hCoV-19/Japan/PG-77093/2021 | EPI_ISL_3887511 | 2021-09-02      |
| hCoV-19/Japan/PG-77094/2021 | EPI_ISL_3887512 | 2021-09-02      |
| hCoV-19/Japan/PG-77095/2021 | EPI_ISL_3887514 | 2021-09-02      |
| hCoV-19/Japan/PG-77096/2021 | EPI_ISL_3887516 | 2021-09-02      |
| hCoV-19/Japan/PG-77097/2021 | EPI_ISL_3887517 | 2021-09-02      |
| hCoV-19/Japan/PG-77098/2021 | EPI_ISL_3887520 | 2021-09-02      |
| hCoV-19/Japan/PG-77099/2021 | EPI_ISL_3887522 | 2021-09-02      |
| hCoV-19/Japan/PG-77100/2021 | EPI_ISL_3887524 | 2021-09-02      |
| hCoV-19/Japan/PG-77101/2021 | EPI_ISL_3887526 | 2021-09-02      |
| hCoV-19/Japan/PG-77102/2021 | EPI_ISL_3887528 | 2021-09-02      |
| hCoV-19/Japan/PG-77103/2021 | EPI_ISL_3887530 | 2021-09-02      |
| hCoV-19/Japan/PG-77104/2021 | EPI_ISL_3887531 | 2021-09-02      |
| hCoV-19/Japan/PG-77105/2021 | EPI_ISL_3887532 | 2021-09-02      |
| hCoV-19/Japan/PG-77106/2021 | EPI_ISL_3887534 | 2021-09-02      |
| hCoV-19/Japan/PG-77107/2021 | EPI_ISL_3887536 | 2021-09-02      |
| hCoV-19/Japan/PG-77108/2021 | EPI_ISL_3887538 | 2021-09-02      |
| hCoV-19/Japan/PG-77109/2021 | EPI_ISL_3887540 | 2021-09-02      |
| hCoV-19/Japan/PG-77110/2021 | EPI_ISL_3887543 | 2021-09-02      |
| hCoV-19/Japan/PG-77111/2021 | EPI_ISL_3887544 | 2021-09-02      |
| hCoV-19/Japan/PG-77112/2021 | EPI_ISL_3887546 | 2021-09-02      |
| hCoV-19/Japan/PG-77113/2021 | EPI_ISL_3887548 | 2021-09-02      |
| hCoV-19/Japan/PG-77114/2021 | EPI_ISL_3887550 | 2021-09-02      |
| hCoV-19/Japan/PG-77115/2021 | EPI_ISL_3887552 | 2021-09-02      |
| hCoV-19/Japan/PG-77116/2021 | EPI_ISL_3887554 | 2021-09-02      |
| hCoV-19/Japan/PG-77117/2021 | EPI_ISL_3887556 | 2021-09-02      |
| hCoV-19/Japan/PG-77118/2021 | EPI_ISL_3887557 | 2021-09-02      |
| hCoV-19/Japan/PG-77119/2021 | EPI_ISL_3887559 | 2021-09-02      |
| hCoV-19/Japan/PG-77120/2021 | EPI_ISL_3887561 | 2021-09-02      |
| hCoV-19/Japan/PG-77121/2021 | EPI_ISL_3887564 | 2021-09-02      |
| hCoV-19/Japan/PG-77122/2021 | EPI_ISL_3887566 | 2021-09-02      |
| hCoV-19/Japan/PG-77123/2021 | EPI_ISL_3887569 | 2021-09-02      |
| hCoV-19/Japan/PG-77124/2021 | EPI_ISL_3887571 | 2021-09-02      |

| virus_name                  | epiID           | submission_date |
|-----------------------------|-----------------|-----------------|
| hCoV-19/Japan/PG-77125/2021 | EPI_ISL_3887573 | 2021-09-02      |
| hCoV-19/Japan/PG-77126/2021 | EPI_ISL_3887575 | 2021-09-02      |
| hCoV-19/Japan/PG-77127/2021 | EPI_ISL_3887577 | 2021-09-02      |
| hCoV-19/Japan/PG-77128/2021 | EPI_ISL_3887579 | 2021-09-02      |
| hCoV-19/Japan/PG-77129/2021 | EPI_ISL_3887581 | 2021-09-02      |
| hCoV-19/Japan/PG-77130/2021 | EPI_ISL_3887583 | 2021-09-02      |
| hCoV-19/Japan/PG-77131/2021 | EPI_ISL_3887585 | 2021-09-02      |
| hCoV-19/Japan/PG-77132/2021 | EPI_ISL_3887586 | 2021-09-02      |
| hCoV-19/Japan/PG-77133/2021 | EPI_ISL_3887589 | 2021-09-02      |
| hCoV-19/Japan/PG-77134/2021 | EPI_ISL_3887590 | 2021-09-02      |
| hCoV-19/Japan/PG-77135/2021 | EPI_ISL_3887592 | 2021-09-02      |
| hCoV-19/Japan/PG-77136/2021 | EPI_ISL_3887594 | 2021-09-02      |
| hCoV-19/Japan/PG-77137/2021 | EPI_ISL_3887597 | 2021-09-02      |
| hCoV-19/Japan/PG-77138/2021 | EPI_ISL_3887599 | 2021-09-02      |
| hCoV-19/Japan/PG-77139/2021 | EPI_ISL_3887601 | 2021-09-02      |
| hCoV-19/Japan/PG-77140/2021 | EPI_ISL_3887603 | 2021-09-02      |
| hCoV-19/Japan/PG-77141/2021 | EPI_ISL_3887605 | 2021-09-02      |
| hCoV-19/Japan/PG-77142/2021 | EPI_ISL_3887608 | 2021-09-02      |
| hCoV-19/Japan/PG-77143/2021 | EPI_ISL_3887610 | 2021-09-02      |
| hCoV-19/Japan/PG-77144/2021 | EPI_ISL_3887612 | 2021-09-02      |
| hCoV-19/Japan/PG-77145/2021 | EPI_ISL_3887614 | 2021-09-02      |
| hCoV-19/Japan/PG-77146/2021 | EPI_ISL_3887615 | 2021-09-02      |
| hCoV-19/Japan/PG-77147/2021 | EPI_ISL_3887617 | 2021-09-02      |
| hCoV-19/Japan/PG-77148/2021 | EPI_ISL_3887619 | 2021-09-02      |
| hCoV-19/Japan/PG-77149/2021 | EPI_ISL_3887621 | 2021-09-02      |
| hCoV-19/Japan/PG-77150/2021 | EPI_ISL_3887623 | 2021-09-02      |
| hCoV-19/Japan/PG-77151/2021 | EPI_ISL_3887624 | 2021-09-02      |
| hCoV-19/Japan/PG-77152/2021 | EPI_ISL_3887626 | 2021-09-02      |
| hCoV-19/Japan/PG-77153/2021 | EPI_ISL_3887627 | 2021-09-02      |
| hCoV-19/Japan/PG-77154/2021 | EPI_ISL_3887629 | 2021-09-02      |
| hCoV-19/Japan/PG-77155/2021 | EPI_ISL_3887630 | 2021-09-02      |
| hCoV-19/Japan/PG-77156/2021 | EPI_ISL_3887632 | 2021-09-02      |
| hCoV-19/Japan/PG-77157/2021 | EPI_ISL_3887634 | 2021-09-02      |
| hCoV-19/Japan/PG-77158/2021 | EPI_ISL_3887635 | 2021-09-02      |
| hCoV-19/Japan/PG-77159/2021 | EPI_ISL_3887636 | 2021-09-02      |
| hCoV-19/Japan/PG-77160/2021 | EPI_ISL_3887638 | 2021-09-02      |
| hCoV-19/Japan/PG-77161/2021 | EPI_ISL_3887640 | 2021-09-02      |
| hCoV-19/Japan/PG-77162/2021 | EPI_ISL_3887642 | 2021-09-02      |
| hCoV-19/Japan/PG-77163/2021 | EPI_ISL_3887643 | 2021-09-02      |
| hCoV-19/Japan/PG-77164/2021 | EPI_ISL_3887644 | 2021-09-02      |
| hCoV-19/Japan/PG-77165/2021 | EPI_ISL_3887646 | 2021-09-02      |
| hCoV-19/Japan/PG-77166/2021 | EPI_ISL_3887648 | 2021-09-02      |
| hCoV-19/Japan/PG-77167/2021 | EPI_ISL_3887649 | 2021-09-02      |
| hCoV-19/Japan/PG-77168/2021 | EPI_ISL_3887651 | 2021-09-02      |
| hCoV-19/Japan/PG-77169/2021 | EPI_ISL_3887652 | 2021-09-02      |
| hCoV-19/Japan/PG-77170/2021 | EPI_ISL_3887655 | 2021-09-02      |
| hCoV-19/Japan/PG-77171/2021 | EPI_ISL_3887657 | 2021-09-02      |
| hCoV-19/Japan/PG-77172/2021 | EPI_ISL_3887659 | 2021-09-02      |
| hCoV-19/Japan/PG-77173/2021 | EPI_ISL_3887661 | 2021-09-02      |
| hCoV-19/Japan/PG-77174/2021 | EPI_ISL_3887663 | 2021-09-02      |
| hCoV-19/Japan/PG-77175/2021 | EPI_ISL_3887665 | 2021-09-02      |
| hCoV-19/Japan/PG-77176/2021 | EPI_ISL_3887666 | 2021-09-02      |
| hCoV-19/Japan/PG-77177/2021 | EPI_ISL_3887668 | 2021-09-02      |
| hCoV-19/Japan/PG-77178/2021 | EPI_ISL_3887670 | 2021-09-02      |



| virus_name                  | epiID           | submission_date |
|-----------------------------|-----------------|-----------------|
| hCoV-19/Japan/PG-77179/2021 | EPI_ISL_3887672 | 2021-09-02      |
| hCoV-19/Japan/PG-77180/2021 | EPI_ISL_3887674 | 2021-09-02      |
| hCoV-19/Japan/PG-77181/2021 | EPI_ISL_3887675 | 2021-09-02      |
| hCoV-19/Japan/PG-77182/2021 | EPI_ISL_3887677 | 2021-09-02      |
| hCoV-19/Japan/PG-77183/2021 | EPI_ISL_3887679 | 2021-09-02      |
| hCoV-19/Japan/PG-77184/2021 | EPI_ISL_3887680 | 2021-09-02      |
| hCoV-19/Japan/PG-77185/2021 | EPI_ISL_3887681 | 2021-09-02      |
| hCoV-19/Japan/PG-77186/2021 | EPI_ISL_3887683 | 2021-09-02      |
| hCoV-19/Japan/PG-77187/2021 | EPI_ISL_3887685 | 2021-09-02      |
| hCoV-19/Japan/PG-77188/2021 | EPI_ISL_3887686 | 2021-09-02      |
| hCoV-19/Japan/PG-77189/2021 | EPI_ISL_3887688 | 2021-09-02      |
| hCoV-19/Japan/PG-77190/2021 | EPI_ISL_3887689 | 2021-09-02      |
| hCoV-19/Japan/PG-77191/2021 | EPI_ISL_3887691 | 2021-09-02      |
| hCoV-19/Japan/PG-77192/2021 | EPI_ISL_3887692 | 2021-09-02      |
| hCoV-19/Japan/PG-77193/2021 | EPI_ISL_3887694 | 2021-09-02      |
| hCoV-19/Japan/PG-77194/2021 | EPI_ISL_3887697 | 2021-09-02      |
| hCoV-19/Japan/PG-77195/2021 | EPI_ISL_3887698 | 2021-09-02      |
| hCoV-19/Japan/PG-77196/2021 | EPI_ISL_3887700 | 2021-09-02      |
| hCoV-19/Japan/PG-77197/2021 | EPI_ISL_3887702 | 2021-09-02      |
| hCoV-19/Japan/PG-77198/2021 | EPI_ISL_3887703 | 2021-09-02      |
| hCoV-19/Japan/PG-77199/2021 | EPI_ISL_3887705 | 2021-09-02      |
| hCoV-19/Japan/PG-77200/2021 | EPI_ISL_3887707 | 2021-09-02      |
| hCoV-19/Japan/PG-77201/2021 | EPI_ISL_3887708 | 2021-09-02      |
| hCoV-19/Japan/PG-77202/2021 | EPI_ISL_3887710 | 2021-09-02      |
| hCoV-19/Japan/PG-77203/2021 | EPI_ISL_3887711 | 2021-09-02      |
| hCoV-19/Japan/PG-77204/2021 | EPI_ISL_3887713 | 2021-09-02      |
| hCoV-19/Japan/PG-77205/2021 | EPI_ISL_3887715 | 2021-09-02      |
| hCoV-19/Japan/PG-77206/2021 | EPI_ISL_3887718 | 2021-09-02      |
| hCoV-19/Japan/PG-77207/2021 | EPI_ISL_3887720 | 2021-09-02      |
| hCoV-19/Japan/PG-77208/2021 | EPI_ISL_3887722 | 2021-09-02      |
| hCoV-19/Japan/PG-77209/2021 | EPI_ISL_3887724 | 2021-09-02      |
| hCoV-19/Japan/PG-77210/2021 | EPI_ISL_3887726 | 2021-09-02      |
| hCoV-19/Japan/PG-77211/2021 | EPI_ISL_3887728 | 2021-09-02      |
| hCoV-19/Japan/PG-77212/2021 | EPI_ISL_3887730 | 2021-09-02      |
| hCoV-19/Japan/PG-77213/2021 | EPI_ISL_3887731 | 2021-09-02      |
| hCoV-19/Japan/PG-77214/2021 | EPI_ISL_3887733 | 2021-09-02      |
| hCoV-19/Japan/PG-77215/2021 | EPI_ISL_3887735 | 2021-09-02      |
| hCoV-19/Japan/PG-77216/2021 | EPI_ISL_3887737 | 2021-09-02      |
| hCoV-19/Japan/PG-77217/2021 | EPI_ISL_3887739 | 2021-09-02      |
| hCoV-19/Japan/PG-77218/2021 | EPI_ISL_3887740 | 2021-09-02      |
| hCoV-19/Japan/PG-77219/2021 | EPI_ISL_3887742 | 2021-09-02      |
| hCoV-19/Japan/PG-77220/2021 | EPI_ISL_3887744 | 2021-09-02      |
| hCoV-19/Japan/PG-77221/2021 | EPI_ISL_3887746 | 2021-09-02      |
| hCoV-19/Japan/PG-77223/2021 | EPI_ISL_3887749 | 2021-09-02      |
| hCoV-19/Japan/PG-77224/2021 | EPI_ISL_3887751 | 2021-09-02      |
| hCoV-19/Japan/PG-77225/2021 | EPI_ISL_3887752 | 2021-09-02      |
| hCoV-19/Japan/PG-77226/2021 | EPI_ISL_3887755 | 2021-09-02      |
| hCoV-19/Japan/PG-77227/2021 | EPI_ISL_3887757 | 2021-09-02      |
| hCoV-19/Japan/PG-77228/2021 | EPI_ISL_3887759 | 2021-09-02      |
| hCoV-19/Japan/PG-77229/2021 | EPI_ISL_3887761 | 2021-09-02      |
| hCoV-19/Japan/PG-77230/2021 | EPI_ISL_3887763 | 2021-09-02      |
| hCoV-19/Japan/PG-77231/2021 | EPI_ISL_3887765 | 2021-09-02      |
| hCoV-19/Japan/PG-77232/2021 | EPI_ISL_3887766 | 2021-09-02      |
| hCoV-19/Japan/PG-77233/2021 | EPI_ISL_3887768 | 2021-09-02      |

| virus_name                  | epiID           | submission_date |
|-----------------------------|-----------------|-----------------|
| hCoV-19/Japan/PG-77234/2021 | EPI_ISL_3887770 | 2021-09-02      |
| hCoV-19/Japan/PG-77235/2021 | EPI_ISL_3887772 | 2021-09-02      |
| hCoV-19/Japan/PG-77236/2021 | EPI_ISL_3887773 | 2021-09-02      |
| hCoV-19/Japan/PG-77237/2021 | EPI_ISL_3887775 | 2021-09-02      |
| hCoV-19/Japan/PG-77238/2021 | EPI_ISL_3887777 | 2021-09-02      |
| hCoV-19/Japan/PG-77239/2021 | EPI_ISL_3887778 | 2021-09-02      |
| hCoV-19/Japan/PG-77240/2021 | EPI_ISL_3887781 | 2021-09-02      |
| hCoV-19/Japan/PG-77241/2021 | EPI_ISL_3887783 | 2021-09-02      |
| hCoV-19/Japan/PG-77242/2021 | EPI_ISL_3887785 | 2021-09-02      |
| hCoV-19/Japan/PG-77243/2021 | EPI_ISL_3887787 | 2021-09-02      |
| hCoV-19/Japan/PG-77244/2021 | EPI_ISL_3887789 | 2021-09-02      |
| hCoV-19/Japan/PG-77245/2021 | EPI_ISL_3887791 | 2021-09-02      |
| hCoV-19/Japan/PG-77246/2021 | EPI_ISL_3887793 | 2021-09-02      |
| hCoV-19/Japan/PG-77247/2021 | EPI_ISL_3887795 | 2021-09-02      |
| hCoV-19/Japan/PG-77248/2021 | EPI_ISL_3887797 | 2021-09-02      |
| hCoV-19/Japan/PG-77249/2021 | EPI_ISL_3887798 | 2021-09-02      |
| hCoV-19/Japan/PG-77250/2021 | EPI_ISL_3887800 | 2021-09-02      |
| hCoV-19/Japan/PG-77251/2021 | EPI_ISL_3887802 | 2021-09-02      |
| hCoV-19/Japan/PG-77252/2021 | EPI_ISL_3887804 | 2021-09-02      |
| hCoV-19/Japan/PG-77253/2021 | EPI_ISL_3887806 | 2021-09-02      |
| hCoV-19/Japan/PG-77254/2021 | EPI_ISL_3887807 | 2021-09-02      |
| hCoV-19/Japan/PG-77255/2021 | EPI_ISL_3887809 | 2021-09-02      |
| hCoV-19/Japan/PG-77256/2021 | EPI_ISL_3887811 | 2021-09-02      |
| hCoV-19/Japan/PG-77257/2021 | EPI_ISL_3887813 | 2021-09-02      |
| hCoV-19/Japan/PG-77258/2021 | EPI_ISL_3887815 | 2021-09-02      |
| hCoV-19/Japan/PG-77259/2021 | EPI_ISL_3887816 | 2021-09-02      |
| hCoV-19/Japan/PG-77260/2021 | EPI_ISL_3887819 | 2021-09-02      |
| hCoV-19/Japan/PG-77261/2021 | EPI_ISL_3887821 | 2021-09-02      |
| hCoV-19/Japan/PG-77262/2021 | EPI_ISL_3887823 | 2021-09-02      |
| hCoV-19/Japan/PG-77263/2021 | EPI_ISL_3887826 | 2021-09-02      |
| hCoV-19/Japan/PG-77264/2021 | EPI_ISL_3887828 | 2021-09-02      |
| hCoV-19/Japan/PG-77265/2021 | EPI_ISL_3887829 | 2021-09-02      |
| hCoV-19/Japan/PG-77266/2021 | EPI_ISL_3887832 | 2021-09-02      |
| hCoV-19/Japan/PG-77267/2021 | EPI_ISL_3887833 | 2021-09-02      |
| hCoV-19/Japan/PG-77268/2021 | EPI_ISL_3887835 | 2021-09-02      |
| hCoV-19/Japan/PG-77269/2021 | EPI_ISL_3887837 | 2021-09-02      |
| hCoV-19/Japan/PG-77270/2021 | EPI_ISL_3887839 | 2021-09-02      |
| hCoV-19/Japan/PG-77271/2021 | EPI_ISL_3887842 | 2021-09-02      |
| hCoV-19/Japan/PG-77272/2021 | EPI_ISL_3887844 | 2021-09-02      |
| hCoV-19/Japan/PG-77273/2021 | EPI_ISL_3887846 | 2021-09-02      |
| hCoV-19/Japan/PG-77274/2021 | EPI_ISL_3887848 | 2021-09-02      |
| hCoV-19/Japan/PG-77275/2021 | EPI_ISL_3887849 | 2021-09-02      |
| hCoV-19/Japan/PG-77276/2021 | EPI_ISL_3887851 | 2021-09-02      |
| hCoV-19/Japan/PG-77277/2021 | EPI_ISL_3887853 | 2021-09-02      |
| hCoV-19/Japan/PG-77278/2021 | EPI_ISL_3887855 | 2021-09-02      |
| hCoV-19/Japan/PG-77279/2021 | EPI_ISL_3887856 | 2021-09-02      |
| hCoV-19/Japan/PG-77280/2021 | EPI_ISL_3887858 | 2021-09-02      |
| hCoV-19/Japan/PG-77281/2021 | EPI_ISL_3887860 | 2021-09-02      |
| hCoV-19/Japan/PG-77282/2021 | EPI_ISL_3887862 | 2021-09-02      |
| hCoV-19/Japan/PG-77283/2021 | EPI_ISL_3887864 | 2021-09-02      |
| hCoV-19/Japan/PG-77284/2021 | EPI_ISL_3887866 | 2021-09-02      |
| hCoV-19/Japan/PG-77285/2021 | EPI_ISL_3887869 | 2021-09-02      |
| hCoV-19/Japan/PG-77286/2021 | EPI_ISL_3887871 | 2021-09-02      |
| hCoV-19/Japan/PG-77287/2021 | EPI_ISL_3887873 | 2021-09-02      |

| virus_name                  | epiID           | submission_date |
|-----------------------------|-----------------|-----------------|
| hCoV-19/Japan/PG-77288/2021 | EPI_ISL_3887875 | 2021-09-02      |
| hCoV-19/Japan/PG-77289/2021 | EPI_ISL_3887877 | 2021-09-02      |
| hCoV-19/Japan/PG-77290/2021 | EPI_ISL_3887879 | 2021-09-02      |
| hCoV-19/Japan/PG-77291/2021 | EPI_ISL_3887881 | 2021-09-02      |
| hCoV-19/Japan/PG-77292/2021 | EPI_ISL_3887883 | 2021-09-02      |
| hCoV-19/Japan/PG-77293/2021 | EPI_ISL_3887885 | 2021-09-02      |
| hCoV-19/Japan/PG-77294/2021 | EPI_ISL_3887886 | 2021-09-02      |
| hCoV-19/Japan/PG-77295/2021 | EPI_ISL_3887889 | 2021-09-02      |
| hCoV-19/Japan/PG-77296/2021 | EPI_ISL_3887891 | 2021-09-02      |
| hCoV-19/Japan/PG-77297/2021 | EPI_ISL_3887893 | 2021-09-02      |
| hCoV-19/Japan/PG-77298/2021 | EPI_ISL_3887895 | 2021-09-02      |
| hCoV-19/Japan/PG-77299/2021 | EPI_ISL_3887897 | 2021-09-02      |
| hCoV-19/Japan/PG-77300/2021 | EPI_ISL_3887899 | 2021-09-02      |
| hCoV-19/Japan/PG-77301/2021 | EPI_ISL_3887901 | 2021-09-02      |
| hCoV-19/Japan/PG-77302/2021 | EPI_ISL_3887903 | 2021-09-02      |
| hCoV-19/Japan/PG-77303/2021 | EPI_ISL_3887905 | 2021-09-02      |
| hCoV-19/Japan/PG-77304/2021 | EPI_ISL_3887907 | 2021-09-02      |
| hCoV-19/Japan/PG-77305/2021 | EPI_ISL_3887909 | 2021-09-02      |
| hCoV-19/Japan/PG-77306/2021 | EPI_ISL_3887911 | 2021-09-02      |
| hCoV-19/Japan/PG-77307/2021 | EPI_ISL_3887913 | 2021-09-02      |
| hCoV-19/Japan/PG-77308/2021 | EPI_ISL_3887915 | 2021-09-02      |
| hCoV-19/Japan/PG-77309/2021 | EPI_ISL_3887917 | 2021-09-02      |
| hCoV-19/Japan/PG-77310/2021 | EPI_ISL_3887919 | 2021-09-02      |
| hCoV-19/Japan/PG-77311/2021 | EPI_ISL_3887921 | 2021-09-02      |
| hCoV-19/Japan/PG-77312/2021 | EPI_ISL_3887923 | 2021-09-02      |
| hCoV-19/Japan/PG-77313/2021 | EPI_ISL_3887925 | 2021-09-02      |
| hCoV-19/Japan/PG-77314/2021 | EPI_ISL_3887927 | 2021-09-02      |
| hCoV-19/Japan/PG-77315/2021 | EPI_ISL_3887929 | 2021-09-02      |
| hCoV-19/Japan/PG-77316/2021 | EPI_ISL_3887931 | 2021-09-02      |
| hCoV-19/Japan/PG-77317/2021 | EPI_ISL_3887932 | 2021-09-02      |
| hCoV-19/Japan/PG-77318/2021 | EPI_ISL_3887934 | 2021-09-02      |
| hCoV-19/Japan/PG-77319/2021 | EPI_ISL_3887935 | 2021-09-02      |
| hCoV-19/Japan/PG-77320/2021 | EPI_ISL_3887937 | 2021-09-02      |
| hCoV-19/Japan/PG-77321/2021 | EPI_ISL_3887938 | 2021-09-02      |
| hCoV-19/Japan/PG-77322/2021 | EPI_ISL_3887940 | 2021-09-02      |
| hCoV-19/Japan/PG-77323/2021 | EPI_ISL_3887941 | 2021-09-02      |
| hCoV-19/Japan/PG-77324/2021 | EPI_ISL_3887943 | 2021-09-02      |
| hCoV-19/Japan/PG-77325/2021 | EPI_ISL_3887944 | 2021-09-02      |
| hCoV-19/Japan/PG-77326/2021 | EPI_ISL_3887946 | 2021-09-02      |
| hCoV-19/Japan/PG-77327/2021 | EPI_ISL_3887947 | 2021-09-02      |
| hCoV-19/Japan/PG-77328/2021 | EPI_ISL_3887948 | 2021-09-02      |
| hCoV-19/Japan/PG-77329/2021 | EPI_ISL_3887949 | 2021-09-02      |
| hCoV-19/Japan/PG-77330/2021 | EPI_ISL_3887951 | 2021-09-02      |
| hCoV-19/Japan/PG-77331/2021 | EPI_ISL_3887953 | 2021-09-02      |
| hCoV-19/Japan/PG-77332/2021 | EPI_ISL_3887954 | 2021-09-02      |
| hCoV-19/Japan/PG-77333/2021 | EPI_ISL_3887956 | 2021-09-02      |
| hCoV-19/Japan/PG-77334/2021 | EPI_ISL_3887958 | 2021-09-02      |
| hCoV-19/Japan/PG-77335/2021 | EPI_ISL_3887960 | 2021-09-02      |
| hCoV-19/Japan/PG-77336/2021 | EPI_ISL_3887962 | 2021-09-02      |
| hCoV-19/Japan/PG-77337/2021 | EPI_ISL_3887964 | 2021-09-02      |
| hCoV-19/Japan/PG-77338/2021 | EPI_ISL_3887967 | 2021-09-02      |
| hCoV-19/Japan/PG-77339/2021 | EPI_ISL_3887969 | 2021-09-02      |
| hCoV-19/Japan/PG-77340/2021 | EPI_ISL_3887972 | 2021-09-02      |
| hCoV-19/Japan/PG-77341/2021 | EPI_ISL_3887974 | 2021-09-02      |

| virus_name                  | epiID           | submission_date |
|-----------------------------|-----------------|-----------------|
| hCoV-19/Japan/PG-77342/2021 | EPI_ISL_3887976 | 2021-09-02      |
| hCoV-19/Japan/PG-77343/2021 | EPI_ISL_3887978 | 2021-09-02      |
| hCoV-19/Japan/PG-77344/2021 | EPI_ISL_3887980 | 2021-09-02      |
| hCoV-19/Japan/PG-77345/2021 | EPI_ISL_3887982 | 2021-09-02      |
| hCoV-19/Japan/PG-77346/2021 | EPI_ISL_3887984 | 2021-09-02      |
| hCoV-19/Japan/PG-77347/2021 | EPI_ISL_3887986 | 2021-09-02      |
| hCoV-19/Japan/PG-77348/2021 | EPI_ISL_3887988 | 2021-09-02      |
| hCoV-19/Japan/PG-77349/2021 | EPI_ISL_3887990 | 2021-09-02      |
| hCoV-19/Japan/PG-77350/2021 | EPI_ISL_3887992 | 2021-09-02      |
| hCoV-19/Japan/PG-77351/2021 | EPI_ISL_3887994 | 2021-09-02      |
| hCoV-19/Japan/PG-77352/2021 | EPI_ISL_3887996 | 2021-09-02      |
| hCoV-19/Japan/PG-77353/2021 | EPI_ISL_3887998 | 2021-09-02      |
| hCoV-19/Japan/PG-77354/2021 | EPI_ISL_3888000 | 2021-09-02      |
| hCoV-19/Japan/PG-77355/2021 | EPI_ISL_3888001 | 2021-09-02      |
| hCoV-19/Japan/PG-77356/2021 | EPI_ISL_3888003 | 2021-09-02      |
| hCoV-19/Japan/PG-77357/2021 | EPI_ISL_3888005 | 2021-09-02      |
| hCoV-19/Japan/PG-77358/2021 | EPI_ISL_3888007 | 2021-09-02      |
| hCoV-19/Japan/PG-77359/2021 | EPI_ISL_3888009 | 2021-09-02      |
| hCoV-19/Japan/PG-77360/2021 | EPI_ISL_3888011 | 2021-09-02      |
| hCoV-19/Japan/PG-77361/2021 | EPI_ISL_3888013 | 2021-09-02      |
| hCoV-19/Japan/PG-77362/2021 | EPI_ISL_3888015 | 2021-09-02      |
| hCoV-19/Japan/PG-77363/2021 | EPI_ISL_3888018 | 2021-09-02      |
| hCoV-19/Japan/PG-77364/2021 | EPI_ISL_3888020 | 2021-09-02      |
| hCoV-19/Japan/PG-77365/2021 | EPI_ISL_3888022 | 2021-09-02      |
| hCoV-19/Japan/PG-77366/2021 | EPI_ISL_3888025 | 2021-09-02      |
| hCoV-19/Japan/PG-77367/2021 | EPI_ISL_3888027 | 2021-09-02      |
| hCoV-19/Japan/PG-77368/2021 | EPI_ISL_3888029 | 2021-09-02      |
| hCoV-19/Japan/PG-77369/2021 | EPI_ISL_3888030 | 2021-09-02      |
| hCoV-19/Japan/PG-77370/2021 | EPI_ISL_3888032 | 2021-09-02      |
| hCoV-19/Japan/PG-77371/2021 | EPI_ISL_3888035 | 2021-09-02      |
| hCoV-19/Japan/PG-77372/2021 | EPI_ISL_3888037 | 2021-09-02      |
| hCoV-19/Japan/PG-77373/2021 | EPI_ISL_3888039 | 2021-09-02      |
| hCoV-19/Japan/PG-77374/2021 | EPI_ISL_3888040 | 2021-09-02      |
| hCoV-19/Japan/PG-77375/2021 | EPI_ISL_3888042 | 2021-09-02      |
| hCoV-19/Japan/PG-77376/2021 | EPI_ISL_3888045 | 2021-09-02      |
| hCoV-19/Japan/PG-77377/2021 | EPI_ISL_3888047 | 2021-09-02      |
| hCoV-19/Japan/PG-77378/2021 | EPI_ISL_3888048 | 2021-09-02      |
| hCoV-19/Japan/PG-77379/2021 | EPI_ISL_3888051 | 2021-09-02      |
| hCoV-19/Japan/PG-77380/2021 | EPI_ISL_3888053 | 2021-09-02      |
| hCoV-19/Japan/PG-77381/2021 | EPI_ISL_3888054 | 2021-09-02      |
| hCoV-19/Japan/PG-77382/2021 | EPI_ISL_3888056 | 2021-09-02      |
| hCoV-19/Japan/PG-77383/2021 | EPI_ISL_3888057 | 2021-09-02      |
| hCoV-19/Japan/PG-77384/2021 | EPI_ISL_3888059 | 2021-09-02      |
| hCoV-19/Japan/PG-77385/2021 | EPI_ISL_3888061 | 2021-09-02      |
| hCoV-19/Japan/PG-77386/2021 | EPI_ISL_3888064 | 2021-09-02      |
| hCoV-19/Japan/PG-77387/2021 | EPI_ISL_3888066 | 2021-09-02      |
| hCoV-19/Japan/PG-77388/2021 | EPI_ISL_3888068 | 2021-09-02      |
| hCoV-19/Japan/PG-77389/2021 | EPI_ISL_3888070 | 2021-09-02      |
| hCoV-19/Japan/PG-77390/2021 | EPI_ISL_3888072 | 2021-09-02      |
| hCoV-19/Japan/PG-77391/2021 | EPI_ISL_3888074 | 2021-09-02      |
| hCoV-19/Japan/PG-77392/2021 | EPI_ISL_3888076 | 2021-09-02      |
| hCoV-19/Japan/PG-77393/2021 | EPI_ISL_3888078 | 2021-09-02      |
| hCoV-19/Japan/PG-77394/2021 | EPI_ISL_3888080 | 2021-09-02      |
| hCoV-19/Japan/PG-77395/2021 | EPI_ISL_3888082 | 2021-09-02      |

| virus_name                  | epiID           | submission_date |
|-----------------------------|-----------------|-----------------|
| hCoV-19/Japan/PG-77396/2021 | EPI_ISL_3888084 | 2021-09-02      |
| hCoV-19/Japan/PG-77397/2021 | EPI_ISL_3888086 | 2021-09-02      |
| hCoV-19/Japan/PG-77398/2021 | EPI_ISL_3888088 | 2021-09-02      |
| hCoV-19/Japan/PG-77399/2021 | EPI_ISL_3888089 | 2021-09-02      |
| hCoV-19/Japan/PG-77400/2021 | EPI_ISL_3888090 | 2021-09-02      |
| hCoV-19/Japan/PG-77401/2021 | EPI_ISL_3888092 | 2021-09-02      |
| hCoV-19/Japan/PG-77402/2021 | EPI_ISL_3888095 | 2021-09-02      |
| hCoV-19/Japan/PG-77403/2021 | EPI_ISL_3888097 | 2021-09-02      |
| hCoV-19/Japan/PG-77404/2021 | EPI_ISL_3888098 | 2021-09-02      |
| hCoV-19/Japan/PG-77405/2021 | EPI_ISL_3888100 | 2021-09-02      |
| hCoV-19/Japan/PG-77406/2021 | EPI_ISL_3888101 | 2021-09-02      |
| hCoV-19/Japan/PG-77408/2021 | EPI_ISL_3888103 | 2021-09-02      |
| hCoV-19/Japan/PG-77409/2021 | EPI_ISL_3888105 | 2021-09-02      |
| hCoV-19/Japan/PG-77410/2021 | EPI_ISL_3888107 | 2021-09-02      |
| hCoV-19/Japan/PG-77411/2021 | EPI_ISL_3888109 | 2021-09-02      |
| hCoV-19/Japan/PG-77412/2021 | EPI_ISL_3888112 | 2021-09-02      |
| hCoV-19/Japan/PG-77413/2021 | EPI_ISL_3888113 | 2021-09-02      |
| hCoV-19/Japan/PG-77414/2021 | EPI_ISL_3888115 | 2021-09-02      |
| hCoV-19/Japan/PG-77415/2021 | EPI_ISL_3888117 | 2021-09-02      |
| hCoV-19/Japan/PG-77416/2021 | EPI_ISL_3888118 | 2021-09-02      |
| hCoV-19/Japan/PG-77417/2021 | EPI_ISL_3888119 | 2021-09-02      |
| hCoV-19/Japan/PG-77418/2021 | EPI_ISL_3888121 | 2021-09-02      |
| hCoV-19/Japan/PG-77419/2021 | EPI_ISL_3888122 | 2021-09-02      |
| hCoV-19/Japan/PG-77420/2021 | EPI_ISL_3888124 | 2021-09-02      |
| hCoV-19/Japan/PG-77421/2021 | EPI_ISL_3888125 | 2021-09-02      |
| hCoV-19/Japan/PG-77422/2021 | EPI_ISL_3888127 | 2021-09-02      |
| hCoV-19/Japan/PG-77423/2021 | EPI_ISL_3888129 | 2021-09-02      |
| hCoV-19/Japan/PG-77424/2021 | EPI_ISL_3888130 | 2021-09-02      |
| hCoV-19/Japan/PG-77425/2021 | EPI_ISL_3888132 | 2021-09-02      |
| hCoV-19/Japan/PG-77426/2021 | EPI_ISL_3888133 | 2021-09-02      |
| hCoV-19/Japan/PG-77427/2021 | EPI_ISL_3888134 | 2021-09-02      |
| hCoV-19/Japan/PG-77428/2021 | EPI_ISL_3888136 | 2021-09-02      |
| hCoV-19/Japan/PG-77429/2021 | EPI_ISL_3888138 | 2021-09-02      |
| hCoV-19/Japan/PG-77430/2021 | EPI_ISL_3888140 | 2021-09-02      |
| hCoV-19/Japan/PG-77431/2021 | EPI_ISL_3888141 | 2021-09-02      |
| hCoV-19/Japan/PG-77432/2021 | EPI_ISL_3888142 | 2021-09-02      |
| hCoV-19/Japan/PG-77433/2021 | EPI_ISL_3888145 | 2021-09-02      |
| hCoV-19/Japan/PG-77434/2021 | EPI_ISL_3888147 | 2021-09-02      |
| hCoV-19/Japan/PG-77435/2021 | EPI_ISL_3888149 | 2021-09-02      |
| hCoV-19/Japan/PG-77436/2021 | EPI_ISL_3888151 | 2021-09-02      |
| hCoV-19/Japan/PG-77437/2021 | EPI_ISL_3888155 | 2021-09-02      |
| hCoV-19/Japan/PG-77438/2021 | EPI_ISL_3888157 | 2021-09-02      |
| hCoV-19/Japan/PG-77439/2021 | EPI_ISL_3888159 | 2021-09-02      |
| hCoV-19/Japan/PG-77440/2021 | EPI_ISL_3888161 | 2021-09-02      |
| hCoV-19/Japan/PG-77441/2021 | EPI_ISL_3888164 | 2021-09-02      |
| hCoV-19/Japan/PG-77442/2021 | EPI_ISL_3888166 | 2021-09-02      |
| hCoV-19/Japan/PG-77443/2021 | EPI_ISL_3888168 | 2021-09-02      |
| hCoV-19/Japan/PG-77444/2021 | EPI_ISL_3888170 | 2021-09-02      |
| hCoV-19/Japan/PG-77445/2021 | EPI_ISL_3888172 | 2021-09-02      |
| hCoV-19/Japan/PG-77446/2021 | EPI_ISL_3888174 | 2021-09-02      |
| hCoV-19/Japan/PG-77447/2021 | EPI_ISL_3888177 | 2021-09-02      |
| hCoV-19/Japan/PG-77448/2021 | EPI_ISL_3888179 | 2021-09-02      |
| hCoV-19/Japan/PG-77449/2021 | EPI_ISL_3888180 | 2021-09-02      |
| hCoV-19/Japan/PG-77450/2021 | EPI_ISL_3888181 | 2021-09-02      |

| virus_name                  | epiID           | submission_date |
|-----------------------------|-----------------|-----------------|
| hCoV-19/Japan/PG-77451/2021 | EPI_ISL_3888183 | 2021-09-02      |
| hCoV-19/Japan/PG-77452/2021 | EPI_ISL_3888185 | 2021-09-02      |
| hCoV-19/Japan/PG-77453/2021 | EPI_ISL_3888187 | 2021-09-02      |
| hCoV-19/Japan/PG-77454/2021 | EPI_ISL_3888190 | 2021-09-02      |
| hCoV-19/Japan/PG-77455/2021 | EPI_ISL_3888192 | 2021-09-02      |
| hCoV-19/Japan/PG-77456/2021 | EPI_ISL_3888194 | 2021-09-02      |
| hCoV-19/Japan/PG-77457/2021 | EPI_ISL_3888196 | 2021-09-02      |
| hCoV-19/Japan/PG-77458/2021 | EPI_ISL_3888197 | 2021-09-02      |
| hCoV-19/Japan/PG-77459/2021 | EPI_ISL_3888199 | 2021-09-02      |
| hCoV-19/Japan/PG-77460/2021 | EPI_ISL_3888201 | 2021-09-02      |
| hCoV-19/Japan/PG-77461/2021 | EPI_ISL_3888202 | 2021-09-02      |
| hCoV-19/Japan/PG-77462/2021 | EPI_ISL_3888204 | 2021-09-02      |
| hCoV-19/Japan/PG-77463/2021 | EPI_ISL_3888206 | 2021-09-02      |
| hCoV-19/Japan/PG-77464/2021 | EPI_ISL_3888207 | 2021-09-02      |
| hCoV-19/Japan/PG-77465/2021 | EPI_ISL_3888209 | 2021-09-02      |
| hCoV-19/Japan/PG-77466/2021 | EPI_ISL_3888211 | 2021-09-02      |
| hCoV-19/Japan/PG-77467/2021 | EPI_ISL_3888213 | 2021-09-02      |
| hCoV-19/Japan/PG-77468/2021 | EPI_ISL_3888214 | 2021-09-02      |
| hCoV-19/Japan/PG-77469/2021 | EPI_ISL_3888215 | 2021-09-02      |
| hCoV-19/Japan/PG-77470/2021 | EPI_ISL_3888217 | 2021-09-02      |
| hCoV-19/Japan/PG-77471/2021 | EPI_ISL_3888219 | 2021-09-02      |
| hCoV-19/Japan/PG-77472/2021 | EPI_ISL_3888221 | 2021-09-02      |
| hCoV-19/Japan/PG-77473/2021 | EPI_ISL_3888223 | 2021-09-02      |
| hCoV-19/Japan/PG-77474/2021 | EPI_ISL_3888225 | 2021-09-02      |
| hCoV-19/Japan/PG-77475/2021 | EPI_ISL_3888227 | 2021-09-02      |
| hCoV-19/Japan/PG-77476/2021 | EPI_ISL_3888229 | 2021-09-02      |
| hCoV-19/Japan/PG-77477/2021 | EPI_ISL_3888230 | 2021-09-02      |
| hCoV-19/Japan/PG-77478/2021 | EPI_ISL_3888232 | 2021-09-02      |
| hCoV-19/Japan/PG-77479/2021 | EPI_ISL_3888234 | 2021-09-02      |
| hCoV-19/Japan/PG-77480/2021 | EPI_ISL_3888236 | 2021-09-02      |
| hCoV-19/Japan/PG-77481/2021 | EPI_ISL_3888238 | 2021-09-02      |
| hCoV-19/Japan/PG-77482/2021 | EPI_ISL_3888240 | 2021-09-02      |
| hCoV-19/Japan/PG-77483/2021 | EPI_ISL_3888241 | 2021-09-02      |
| hCoV-19/Japan/PG-77484/2021 | EPI_ISL_3888242 | 2021-09-02      |
| hCoV-19/Japan/PG-77485/2021 | EPI_ISL_3888244 | 2021-09-02      |
| hCoV-19/Japan/PG-77486/2021 | EPI_ISL_3888247 | 2021-09-02      |
| hCoV-19/Japan/PG-77487/2021 | EPI_ISL_3888249 | 2021-09-02      |
| hCoV-19/Japan/PG-77488/2021 | EPI_ISL_3888251 | 2021-09-02      |
| hCoV-19/Japan/PG-77489/2021 | EPI_ISL_3888253 | 2021-09-02      |
| hCoV-19/Japan/PG-77490/2021 | EPI_ISL_3888255 | 2021-09-02      |
| hCoV-19/Japan/PG-77491/2021 | EPI_ISL_3888257 | 2021-09-02      |
| hCoV-19/Japan/PG-77492/2021 | EPI_ISL_3888260 | 2021-09-02      |
| hCoV-19/Japan/PG-77493/2021 | EPI_ISL_3888262 | 2021-09-02      |
| hCoV-19/Japan/PG-77494/2021 | EPI_ISL_3888263 | 2021-09-02      |
| hCoV-19/Japan/PG-77495/2021 | EPI_ISL_3888265 | 2021-09-02      |
| hCoV-19/Japan/PG-77496/2021 | EPI_ISL_3888267 | 2021-09-02      |
| hCoV-19/Japan/PG-77497/2021 | EPI_ISL_3888269 | 2021-09-02      |
| hCoV-19/Japan/PG-77498/2021 | EPI_ISL_3888271 | 2021-09-02      |
| hCoV-19/Japan/PG-77499/2021 | EPI_ISL_3888274 | 2021-09-02      |
| hCoV-19/Japan/PG-77500/2021 | EPI_ISL_3888276 | 2021-09-02      |
| hCoV-19/Japan/PG-77501/2021 | EPI_ISL_3888279 | 2021-09-02      |
| hCoV-19/Japan/PG-77502/2021 | EPI_ISL_3888281 | 2021-09-02      |
| hCoV-19/Japan/PG-77503/2021 | EPI_ISL_3888283 | 2021-09-02      |
| hCoV-19/Japan/PG-77504/2021 | EPI_ISL_3888286 | 2021-09-02      |

| virus_name                  | epiID           | submission_date |
|-----------------------------|-----------------|-----------------|
| hCoV-19/Japan/PG-77505/2021 | EPI_ISL_3888288 | 2021-09-02      |
| hCoV-19/Japan/PG-77506/2021 | EPI_ISL_3888291 | 2021-09-02      |
| hCoV-19/Japan/PG-77507/2021 | EPI_ISL_3888293 | 2021-09-02      |
| hCoV-19/Japan/PG-77508/2021 | EPI_ISL_3888295 | 2021-09-02      |
| hCoV-19/Japan/PG-77509/2021 | EPI_ISL_3888298 | 2021-09-02      |
| hCoV-19/Japan/PG-77510/2021 | EPI_ISL_3888300 | 2021-09-02      |
| hCoV-19/Japan/PG-77511/2021 | EPI_ISL_3888302 | 2021-09-02      |
| hCoV-19/Japan/PG-77512/2021 | EPI_ISL_3888304 | 2021-09-02      |
| hCoV-19/Japan/PG-77513/2021 | EPI_ISL_3888306 | 2021-09-02      |
| hCoV-19/Japan/PG-77514/2021 | EPI_ISL_3888308 | 2021-09-02      |
| hCoV-19/Japan/PG-77515/2021 | EPI_ISL_3888310 | 2021-09-02      |
| hCoV-19/Japan/PG-77516/2021 | EPI_ISL_3888311 | 2021-09-02      |
| hCoV-19/Japan/PG-77517/2021 | EPI_ISL_3888313 | 2021-09-02      |
| hCoV-19/Japan/PG-77518/2021 | EPI_ISL_3888315 | 2021-09-02      |
| hCoV-19/Japan/PG-77519/2021 | EPI_ISL_3888316 | 2021-09-02      |
| hCoV-19/Japan/PG-77520/2021 | EPI_ISL_3888318 | 2021-09-02      |
| hCoV-19/Japan/PG-77521/2021 | EPI_ISL_3888320 | 2021-09-02      |
| hCoV-19/Japan/PG-77522/2021 | EPI_ISL_3888322 | 2021-09-02      |
| hCoV-19/Japan/PG-77523/2021 | EPI_ISL_3888324 | 2021-09-02      |
| hCoV-19/Japan/PG-77524/2021 | EPI_ISL_3888327 | 2021-09-02      |
| hCoV-19/Japan/PG-77525/2021 | EPI_ISL_3888329 | 2021-09-02      |
| hCoV-19/Japan/PG-77526/2021 | EPI_ISL_3888332 | 2021-09-02      |
| hCoV-19/Japan/PG-77527/2021 | EPI_ISL_3888334 | 2021-09-02      |
| hCoV-19/Japan/PG-77528/2021 | EPI_ISL_3888336 | 2021-09-02      |
| hCoV-19/Japan/PG-77529/2021 | EPI_ISL_3888339 | 2021-09-02      |
| hCoV-19/Japan/PG-77530/2021 | EPI_ISL_3888340 | 2021-09-02      |
| hCoV-19/Japan/PG-77531/2021 | EPI_ISL_3888343 | 2021-09-02      |
| hCoV-19/Japan/PG-77532/2021 | EPI_ISL_3888346 | 2021-09-02      |
| hCoV-19/Japan/PG-77533/2021 | EPI_ISL_3888348 | 2021-09-02      |
| hCoV-19/Japan/PG-77534/2021 | EPI_ISL_3888349 | 2021-09-02      |
| hCoV-19/Japan/PG-77535/2021 | EPI_ISL_3888350 | 2021-09-02      |
| hCoV-19/Japan/PG-77536/2021 | EPI_ISL_3888352 | 2021-09-02      |
| hCoV-19/Japan/PG-77537/2021 | EPI_ISL_3888354 | 2021-09-02      |
| hCoV-19/Japan/PG-77538/2021 | EPI_ISL_3888355 | 2021-09-02      |
| hCoV-19/Japan/PG-77539/2021 | EPI_ISL_3888358 | 2021-09-02      |
| hCoV-19/Japan/PG-77540/2021 | EPI_ISL_3888360 | 2021-09-02      |
| hCoV-19/Japan/PG-77541/2021 | EPI_ISL_3888362 | 2021-09-02      |
| hCoV-19/Japan/PG-77542/2021 | EPI_ISL_3888363 | 2021-09-02      |
| hCoV-19/Japan/PG-77543/2021 | EPI_ISL_3888364 | 2021-09-02      |
| hCoV-19/Japan/PG-77544/2021 | EPI_ISL_3888366 | 2021-09-02      |
| hCoV-19/Japan/PG-77545/2021 | EPI_ISL_3888368 | 2021-09-02      |
| hCoV-19/Japan/PG-77546/2021 | EPI_ISL_3888370 | 2021-09-02      |
| hCoV-19/Japan/PG-77547/2021 | EPI_ISL_3888372 | 2021-09-02      |
| hCoV-19/Japan/PG-77548/2021 | EPI_ISL_3888374 | 2021-09-02      |
| hCoV-19/Japan/PG-77549/2021 | EPI_ISL_3888376 | 2021-09-02      |
| hCoV-19/Japan/PG-77550/2021 | EPI_ISL_3888378 | 2021-09-02      |
| hCoV-19/Japan/PG-77551/2021 | EPI_ISL_3888380 | 2021-09-02      |
| hCoV-19/Japan/PG-77552/2021 | EPI_ISL_3888382 | 2021-09-02      |
| hCoV-19/Japan/PG-77553/2021 | EPI_ISL_3888384 | 2021-09-02      |
| hCoV-19/Japan/PG-77554/2021 | EPI_ISL_3888386 | 2021-09-02      |
| hCoV-19/Japan/PG-77555/2021 | EPI_ISL_3888388 | 2021-09-02      |
| hCoV-19/Japan/PG-77556/2021 | EPI_ISL_3888389 | 2021-09-02      |
| hCoV-19/Japan/PG-77557/2021 | EPI_ISL_3888390 | 2021-09-02      |
| hCoV-19/Japan/PG-77558/2021 | EPI_ISL_3888391 | 2021-09-02      |

| virus_name                  | epiID           | submission_date |
|-----------------------------|-----------------|-----------------|
| hCoV-19/Japan/PG-77559/2021 | EPI_ISL_3888392 | 2021-09-02      |
| hCoV-19/Japan/PG-77560/2021 | EPI_ISL_3888393 | 2021-09-02      |
| hCoV-19/Japan/PG-77561/2021 | EPI_ISL_3888394 | 2021-09-02      |
| hCoV-19/Japan/PG-77562/2021 | EPI_ISL_3888395 | 2021-09-02      |
| hCoV-19/Japan/PG-77563/2021 | EPI_ISL_3888396 | 2021-09-02      |
| hCoV-19/Japan/PG-77564/2021 | EPI_ISL_3888397 | 2021-09-02      |
| hCoV-19/Japan/PG-77565/2021 | EPI_ISL_3888398 | 2021-09-02      |
| hCoV-19/Japan/PG-77566/2021 | EPI_ISL_3888399 | 2021-09-02      |
| hCoV-19/Japan/PG-77567/2021 | EPI_ISL_3888400 | 2021-09-02      |
| hCoV-19/Japan/PG-77568/2021 | EPI_ISL_3888401 | 2021-09-02      |
| hCoV-19/Japan/PG-77569/2021 | EPI_ISL_3888402 | 2021-09-02      |
| hCoV-19/Japan/PG-77570/2021 | EPI_ISL_3888403 | 2021-09-02      |
| hCoV-19/Japan/PG-77571/2021 | EPI_ISL_3888404 | 2021-09-02      |
| hCoV-19/Japan/PG-77572/2021 | EPI_ISL_3888406 | 2021-09-02      |
| hCoV-19/Japan/PG-77573/2021 | EPI_ISL_3888409 | 2021-09-02      |
| hCoV-19/Japan/PG-77574/2021 | EPI_ISL_3888411 | 2021-09-02      |
| hCoV-19/Japan/PG-77575/2021 | EPI_ISL_3888412 | 2021-09-02      |
| hCoV-19/Japan/PG-77576/2021 | EPI_ISL_3888415 | 2021-09-02      |
| hCoV-19/Japan/PG-77577/2021 | EPI_ISL_3888417 | 2021-09-02      |
| hCoV-19/Japan/PG-77578/2021 | EPI_ISL_3888419 | 2021-09-02      |
| hCoV-19/Japan/PG-77579/2021 | EPI_ISL_3888421 | 2021-09-02      |
| hCoV-19/Japan/PG-77580/2021 | EPI_ISL_3888423 | 2021-09-02      |
| hCoV-19/Japan/PG-77581/2021 | EPI_ISL_3888425 | 2021-09-02      |
| hCoV-19/Japan/PG-77582/2021 | EPI_ISL_3888427 | 2021-09-02      |
| hCoV-19/Japan/PG-77583/2021 | EPI_ISL_3888430 | 2021-09-02      |
| hCoV-19/Japan/PG-77584/2021 | EPI_ISL_3888432 | 2021-09-02      |
| hCoV-19/Japan/PG-77585/2021 | EPI_ISL_3888434 | 2021-09-02      |
| hCoV-19/Japan/PG-77586/2021 | EPI_ISL_3888435 | 2021-09-02      |
| hCoV-19/Japan/PG-77587/2021 | EPI_ISL_3888438 | 2021-09-02      |
| hCoV-19/Japan/PG-77588/2021 | EPI_ISL_3888440 | 2021-09-02      |
| hCoV-19/Japan/PG-77589/2021 | EPI_ISL_3888442 | 2021-09-02      |
| hCoV-19/Japan/PG-77590/2021 | EPI_ISL_3888444 | 2021-09-02      |
| hCoV-19/Japan/PG-77591/2021 | EPI_ISL_3888445 | 2021-09-02      |
| hCoV-19/Japan/PG-77592/2021 | EPI_ISL_3888446 | 2021-09-02      |
| hCoV-19/Japan/PG-77593/2021 | EPI_ISL_3888447 | 2021-09-02      |
| hCoV-19/Japan/PG-77594/2021 | EPI_ISL_3888448 | 2021-09-02      |
| hCoV-19/Japan/PG-77595/2021 | EPI_ISL_3888449 | 2021-09-02      |
| hCoV-19/Japan/PG-77596/2021 | EPI_ISL_3888452 | 2021-09-02      |
| hCoV-19/Japan/PG-77597/2021 | EPI_ISL_3888454 | 2021-09-02      |
| hCoV-19/Japan/PG-77598/2021 | EPI_ISL_3888457 | 2021-09-02      |
| hCoV-19/Japan/PG-77599/2021 | EPI_ISL_3888459 | 2021-09-02      |
| hCoV-19/Japan/PG-77600/2021 | EPI_ISL_3888461 | 2021-09-02      |
| hCoV-19/Japan/PG-77601/2021 | EPI_ISL_3888464 | 2021-09-02      |
| hCoV-19/Japan/PG-77602/2021 | EPI_ISL_3888467 | 2021-09-02      |
| hCoV-19/Japan/PG-77603/2021 | EPI_ISL_3888470 | 2021-09-02      |
| hCoV-19/Japan/PG-77604/2021 | EPI_ISL_3888473 | 2021-09-02      |
| hCoV-19/Japan/PG-77605/2021 | EPI_ISL_3888475 | 2021-09-02      |
| hCoV-19/Japan/PG-77606/2021 | EPI_ISL_3888478 | 2021-09-02      |
| hCoV-19/Japan/PG-77607/2021 | EPI_ISL_3888479 | 2021-09-02      |
| hCoV-19/Japan/PG-77608/2021 | EPI_ISL_3888481 | 2021-09-02      |
| hCoV-19/Japan/PG-77609/2021 | EPI_ISL_3888484 | 2021-09-02      |
| hCoV-19/Japan/PG-77610/2021 | EPI_ISL_3888485 | 2021-09-02      |
| hCoV-19/Japan/PG-77611/2021 | EPI_ISL_3888488 | 2021-09-02      |
| hCoV-19/Japan/PG-77612/2021 | EPI_ISL_3888491 | 2021-09-02      |



| virus_name                  | epiID           | submission_date |
|-----------------------------|-----------------|-----------------|
| hCoV-19/Japan/PG-77613/2021 | EPI_ISL_3888493 | 2021-09-02      |
| hCoV-19/Japan/PG-77614/2021 | EPI_ISL_3888496 | 2021-09-02      |
| hCoV-19/Japan/PG-77615/2021 | EPI_ISL_3888499 | 2021-09-02      |
| hCoV-19/Japan/PG-77616/2021 | EPI_ISL_3888501 | 2021-09-02      |
| hCoV-19/Japan/PG-77617/2021 | EPI_ISL_3888503 | 2021-09-02      |
| hCoV-19/Japan/PG-77618/2021 | EPI_ISL_3888504 | 2021-09-02      |
| hCoV-19/Japan/PG-77619/2021 | EPI_ISL_3888506 | 2021-09-02      |
| hCoV-19/Japan/PG-77620/2021 | EPI_ISL_3888508 | 2021-09-02      |
| hCoV-19/Japan/PG-77621/2021 | EPI_ISL_3888511 | 2021-09-02      |
| hCoV-19/Japan/PG-77622/2021 | EPI_ISL_3888513 | 2021-09-02      |
| hCoV-19/Japan/PG-77623/2021 | EPI_ISL_3888514 | 2021-09-02      |
| hCoV-19/Japan/PG-77624/2021 | EPI_ISL_3888515 | 2021-09-02      |
| hCoV-19/Japan/PG-77625/2021 | EPI_ISL_3888516 | 2021-09-02      |
| hCoV-19/Japan/PG-77626/2021 | EPI_ISL_3888517 | 2021-09-02      |
| hCoV-19/Japan/PG-77627/2021 | EPI_ISL_3888518 | 2021-09-02      |
| hCoV-19/Japan/PG-77628/2021 | EPI_ISL_3888519 | 2021-09-02      |
| hCoV-19/Japan/PG-77629/2021 | EPI_ISL_3888522 | 2021-09-02      |
| hCoV-19/Japan/PG-77630/2021 | EPI_ISL_3888524 | 2021-09-02      |
| hCoV-19/Japan/PG-77631/2021 | EPI_ISL_3888526 | 2021-09-02      |
| hCoV-19/Japan/PG-77632/2021 | EPI_ISL_3888528 | 2021-09-02      |
| hCoV-19/Japan/PG-77633/2021 | EPI_ISL_3888531 | 2021-09-02      |
| hCoV-19/Japan/PG-77634/2021 | EPI_ISL_3888534 | 2021-09-02      |
| hCoV-19/Japan/PG-77635/2021 | EPI_ISL_3888537 | 2021-09-02      |
| hCoV-19/Japan/PG-77636/2021 | EPI_ISL_3888539 | 2021-09-02      |
| hCoV-19/Japan/PG-77637/2021 | EPI_ISL_3888541 | 2021-09-02      |
| hCoV-19/Japan/PG-77638/2021 | EPI_ISL_3888544 | 2021-09-02      |
| hCoV-19/Japan/PG-77639/2021 | EPI_ISL_3888546 | 2021-09-02      |
| hCoV-19/Japan/PG-77640/2021 | EPI_ISL_3888549 | 2021-09-02      |
| hCoV-19/Japan/PG-77641/2021 | EPI_ISL_3888551 | 2021-09-02      |
| hCoV-19/Japan/PG-77642/2021 | EPI_ISL_3888554 | 2021-09-02      |
| hCoV-19/Japan/PG-77643/2021 | EPI_ISL_3888556 | 2021-09-02      |
| hCoV-19/Japan/PG-77644/2021 | EPI_ISL_3888558 | 2021-09-02      |
| hCoV-19/Japan/PG-77645/2021 | EPI_ISL_3888561 | 2021-09-02      |
| hCoV-19/Japan/PG-77646/2021 | EPI_ISL_3888563 | 2021-09-02      |
| hCoV-19/Japan/PG-77647/2021 | EPI_ISL_3888565 | 2021-09-02      |
| hCoV-19/Japan/PG-77648/2021 | EPI_ISL_3888566 | 2021-09-02      |
| hCoV-19/Japan/PG-77649/2021 | EPI_ISL_3888569 | 2021-09-02      |
| hCoV-19/Japan/PG-77650/2021 | EPI_ISL_3888571 | 2021-09-02      |
| hCoV-19/Japan/PG-77651/2021 | EPI_ISL_3888574 | 2021-09-02      |
| hCoV-19/Japan/PG-77652/2021 | EPI_ISL_3888577 | 2021-09-02      |
| hCoV-19/Japan/PG-77653/2021 | EPI_ISL_3888579 | 2021-09-02      |
| hCoV-19/Japan/PG-77654/2021 | EPI_ISL_3888581 | 2021-09-02      |
| hCoV-19/Japan/PG-77655/2021 | EPI_ISL_3888583 | 2021-09-02      |
| hCoV-19/Japan/PG-77656/2021 | EPI_ISL_3888586 | 2021-09-02      |
| hCoV-19/Japan/PG-77657/2021 | EPI_ISL_3888587 | 2021-09-02      |
| hCoV-19/Japan/PG-77658/2021 | EPI_ISL_3888590 | 2021-09-02      |
| hCoV-19/Japan/PG-77659/2021 | EPI_ISL_3888593 | 2021-09-02      |
| hCoV-19/Japan/PG-77660/2021 | EPI_ISL_3888595 | 2021-09-02      |
| hCoV-19/Japan/PG-77661/2021 | EPI_ISL_3888597 | 2021-09-02      |
| hCoV-19/Japan/PG-77662/2021 | EPI_ISL_3888599 | 2021-09-02      |
| hCoV-19/Japan/PG-77663/2021 | EPI_ISL_3888601 | 2021-09-02      |
| hCoV-19/Japan/PG-77664/2021 | EPI_ISL_3888604 | 2021-09-02      |
| hCoV-19/Japan/PG-77665/2021 | EPI_ISL_3888606 | 2021-09-02      |
| hCoV-19/Japan/PG-77666/2021 | EPI_ISL_3888607 | 2021-09-02      |

| virus_name                  | epiID           | submission_date |
|-----------------------------|-----------------|-----------------|
| hCoV-19/Japan/PG-77667/2021 | EPI_ISL_3888609 | 2021-09-02      |
| hCoV-19/Japan/PG-77668/2021 | EPI_ISL_3888612 | 2021-09-02      |
| hCoV-19/Japan/PG-77669/2021 | EPI_ISL_3888614 | 2021-09-02      |
| hCoV-19/Japan/PG-77670/2021 | EPI_ISL_3888617 | 2021-09-02      |
| hCoV-19/Japan/PG-77671/2021 | EPI_ISL_3888620 | 2021-09-02      |
| hCoV-19/Japan/PG-77672/2021 | EPI_ISL_3888622 | 2021-09-02      |
| hCoV-19/Japan/PG-77673/2021 | EPI_ISL_3888624 | 2021-09-02      |
| hCoV-19/Japan/PG-77674/2021 | EPI_ISL_3888626 | 2021-09-02      |
| hCoV-19/Japan/PG-77675/2021 | EPI_ISL_3888628 | 2021-09-02      |
| hCoV-19/Japan/PG-77676/2021 | EPI_ISL_3888630 | 2021-09-02      |
| hCoV-19/Japan/PG-77677/2021 | EPI_ISL_3888632 | 2021-09-02      |
| hCoV-19/Japan/PG-77678/2021 | EPI_ISL_3888634 | 2021-09-02      |
| hCoV-19/Japan/PG-77679/2021 | EPI_ISL_3888636 | 2021-09-02      |
| hCoV-19/Japan/PG-77680/2021 | EPI_ISL_3888638 | 2021-09-02      |
| hCoV-19/Japan/PG-77681/2021 | EPI_ISL_3888639 | 2021-09-02      |
| hCoV-19/Japan/PG-77682/2021 | EPI_ISL_3888641 | 2021-09-02      |
| hCoV-19/Japan/PG-77683/2021 | EPI_ISL_3888643 | 2021-09-02      |
| hCoV-19/Japan/PG-77684/2021 | EPI_ISL_3888646 | 2021-09-02      |
| hCoV-19/Japan/PG-77685/2021 | EPI_ISL_3888647 | 2021-09-02      |
| hCoV-19/Japan/PG-77686/2021 | EPI_ISL_3888649 | 2021-09-02      |
| hCoV-19/Japan/PG-77687/2021 | EPI_ISL_3888651 | 2021-09-02      |
| hCoV-19/Japan/PG-77688/2021 | EPI_ISL_3888653 | 2021-09-02      |
| hCoV-19/Japan/PG-77689/2021 | EPI_ISL_3888655 | 2021-09-02      |
| hCoV-19/Japan/PG-77690/2021 | EPI_ISL_3888657 | 2021-09-02      |
| hCoV-19/Japan/PG-77691/2021 | EPI_ISL_3888659 | 2021-09-02      |
| hCoV-19/Japan/PG-77692/2021 | EPI_ISL_3888662 | 2021-09-02      |
| hCoV-19/Japan/PG-77693/2021 | EPI_ISL_3888663 | 2021-09-02      |
| hCoV-19/Japan/PG-77694/2021 | EPI_ISL_3888665 | 2021-09-02      |
| hCoV-19/Japan/PG-77695/2021 | EPI_ISL_3888668 | 2021-09-02      |
| hCoV-19/Japan/PG-77696/2021 | EPI_ISL_3888670 | 2021-09-02      |
| hCoV-19/Japan/PG-77697/2021 | EPI_ISL_3888673 | 2021-09-02      |
| hCoV-19/Japan/PG-77698/2021 | EPI_ISL_3888675 | 2021-09-02      |
| hCoV-19/Japan/PG-77699/2021 | EPI_ISL_3888676 | 2021-09-02      |
| hCoV-19/Japan/PG-77700/2021 | EPI_ISL_3888679 | 2021-09-02      |
| hCoV-19/Japan/PG-77701/2021 | EPI_ISL_3888681 | 2021-09-02      |
| hCoV-19/Japan/PG-77702/2021 | EPI_ISL_3888684 | 2021-09-02      |
| hCoV-19/Japan/PG-77703/2021 | EPI_ISL_3888686 | 2021-09-02      |
| hCoV-19/Japan/PG-77704/2021 | EPI_ISL_3888688 | 2021-09-02      |
| hCoV-19/Japan/PG-77705/2021 | EPI_ISL_3888690 | 2021-09-02      |
| hCoV-19/Japan/PG-77706/2021 | EPI_ISL_3888692 | 2021-09-02      |
| hCoV-19/Japan/PG-77707/2021 | EPI_ISL_3888694 | 2021-09-02      |
| hCoV-19/Japan/PG-77708/2021 | EPI_ISL_3888696 | 2021-09-02      |
| hCoV-19/Japan/PG-77709/2021 | EPI_ISL_3888698 | 2021-09-02      |
| hCoV-19/Japan/PG-77710/2021 | EPI_ISL_3888701 | 2021-09-02      |
| hCoV-19/Japan/PG-77711/2021 | EPI_ISL_3888703 | 2021-09-02      |
| hCoV-19/Japan/PG-77712/2021 | EPI_ISL_3888705 | 2021-09-02      |
| hCoV-19/Japan/PG-77713/2021 | EPI_ISL_3888707 | 2021-09-02      |
| hCoV-19/Japan/PG-77714/2021 | EPI_ISL_3888709 | 2021-09-02      |
| hCoV-19/Japan/PG-77715/2021 | EPI_ISL_3888711 | 2021-09-02      |
| hCoV-19/Japan/PG-77716/2021 | EPI_ISL_3888713 | 2021-09-02      |
| hCoV-19/Japan/PG-77717/2021 | EPI_ISL_3888715 | 2021-09-02      |
| hCoV-19/Japan/PG-77718/2021 | EPI_ISL_3888717 | 2021-09-02      |
| hCoV-19/Japan/PG-77719/2021 | EPI_ISL_3888719 | 2021-09-02      |
| hCoV-19/Japan/PG-77720/2021 | EPI_ISL_3888721 | 2021-09-02      |

| virus_name                  | epiID           | submission_date |
|-----------------------------|-----------------|-----------------|
| hCoV-19/Japan/PG-77721/2021 | EPI_ISL_3888722 | 2021-09-02      |
| hCoV-19/Japan/PG-77722/2021 | EPI_ISL_3888724 | 2021-09-02      |
| hCoV-19/Japan/PG-77723/2021 | EPI_ISL_3888727 | 2021-09-02      |
| hCoV-19/Japan/PG-77724/2021 | EPI_ISL_3888729 | 2021-09-02      |
| hCoV-19/Japan/PG-77725/2021 | EPI_ISL_3888731 | 2021-09-02      |
| hCoV-19/Japan/PG-77726/2021 | EPI_ISL_3888733 | 2021-09-02      |
| hCoV-19/Japan/PG-77727/2021 | EPI_ISL_3888736 | 2021-09-02      |
| hCoV-19/Japan/PG-77728/2021 | EPI_ISL_3888738 | 2021-09-02      |
| hCoV-19/Japan/PG-77729/2021 | EPI_ISL_3888741 | 2021-09-02      |
| hCoV-19/Japan/PG-77730/2021 | EPI_ISL_3888743 | 2021-09-02      |
| hCoV-19/Japan/PG-77731/2021 | EPI_ISL_3888745 | 2021-09-02      |
| hCoV-19/Japan/PG-77732/2021 | EPI_ISL_3888747 | 2021-09-02      |
| hCoV-19/Japan/PG-77733/2021 | EPI_ISL_3888749 | 2021-09-02      |
| hCoV-19/Japan/PG-77734/2021 | EPI_ISL_3888751 | 2021-09-02      |
| hCoV-19/Japan/PG-77735/2021 | EPI_ISL_3888752 | 2021-09-02      |
| hCoV-19/Japan/PG-77736/2021 | EPI_ISL_3888754 | 2021-09-02      |
| hCoV-19/Japan/PG-77737/2021 | EPI_ISL_3888757 | 2021-09-02      |
| hCoV-19/Japan/PG-77738/2021 | EPI_ISL_3888759 | 2021-09-02      |
| hCoV-19/Japan/PG-77739/2021 | EPI_ISL_3888761 | 2021-09-02      |
| hCoV-19/Japan/PG-77740/2021 | EPI_ISL_3888763 | 2021-09-02      |
| hCoV-19/Japan/PG-77741/2021 | EPI_ISL_3888764 | 2021-09-02      |
| hCoV-19/Japan/PG-77742/2021 | EPI_ISL_3888767 | 2021-09-02      |
| hCoV-19/Japan/PG-77743/2021 | EPI_ISL_3888769 | 2021-09-02      |
| hCoV-19/Japan/PG-77744/2021 | EPI_ISL_3888771 | 2021-09-02      |
| hCoV-19/Japan/PG-77745/2021 | EPI_ISL_3888773 | 2021-09-02      |
| hCoV-19/Japan/PG-77746/2021 | EPI_ISL_3888776 | 2021-09-02      |
| hCoV-19/Japan/PG-77747/2021 | EPI_ISL_3888778 | 2021-09-02      |
| hCoV-19/Japan/PG-77748/2021 | EPI_ISL_3888780 | 2021-09-02      |
| hCoV-19/Japan/PG-77749/2021 | EPI_ISL_3888783 | 2021-09-02      |
| hCoV-19/Japan/PG-77750/2021 | EPI_ISL_3888785 | 2021-09-02      |
| hCoV-19/Japan/PG-77751/2021 | EPI_ISL_3888788 | 2021-09-02      |
| hCoV-19/Japan/PG-77752/2021 | EPI_ISL_3888790 | 2021-09-02      |
| hCoV-19/Japan/PG-77753/2021 | EPI_ISL_3888792 | 2021-09-02      |
| hCoV-19/Japan/PG-77754/2021 | EPI_ISL_3888794 | 2021-09-02      |
| hCoV-19/Japan/PG-77755/2021 | EPI_ISL_3888795 | 2021-09-02      |
| hCoV-19/Japan/PG-77756/2021 | EPI_ISL_3888797 | 2021-09-02      |
| hCoV-19/Japan/PG-77757/2021 | EPI_ISL_3888800 | 2021-09-02      |
| hCoV-19/Japan/PG-77758/2021 | EPI_ISL_3888803 | 2021-09-02      |
| hCoV-19/Japan/PG-77759/2021 | EPI_ISL_3888804 | 2021-09-02      |
| hCoV-19/Japan/PG-77760/2021 | EPI_ISL_3888806 | 2021-09-02      |
| hCoV-19/Japan/PG-77761/2021 | EPI_ISL_3888808 | 2021-09-02      |
| hCoV-19/Japan/PG-77762/2021 | EPI_ISL_3888811 | 2021-09-02      |
| hCoV-19/Japan/PG-77763/2021 | EPI_ISL_3888813 | 2021-09-02      |
| hCoV-19/Japan/PG-77764/2021 | EPI_ISL_3888815 | 2021-09-02      |
| hCoV-19/Japan/PG-77765/2021 | EPI_ISL_3888817 | 2021-09-02      |
| hCoV-19/Japan/PG-77766/2021 | EPI_ISL_3888819 | 2021-09-02      |
| hCoV-19/Japan/PG-77767/2021 | EPI_ISL_3888822 | 2021-09-02      |
| hCoV-19/Japan/PG-77768/2021 | EPI_ISL_3888824 | 2021-09-02      |
| hCoV-19/Japan/PG-77769/2021 | EPI_ISL_3888826 | 2021-09-02      |
| hCoV-19/Japan/PG-77770/2021 | EPI_ISL_3888829 | 2021-09-02      |
| hCoV-19/Japan/PG-77771/2021 | EPI_ISL_3888831 | 2021-09-02      |
| hCoV-19/Japan/PG-77772/2021 | EPI_ISL_3888832 | 2021-09-02      |
| hCoV-19/Japan/PG-77773/2021 | EPI_ISL_3888834 | 2021-09-02      |
| hCoV-19/Japan/PG-77774/2021 | EPI_ISL_3888837 | 2021-09-02      |

| virus_name                  | epiID           | submission_date |
|-----------------------------|-----------------|-----------------|
| hCoV-19/Japan/PG-77775/2021 | EPI_ISL_3888839 | 2021-09-02      |
| hCoV-19/Japan/PG-77776/2021 | EPI_ISL_3888841 | 2021-09-02      |
| hCoV-19/Japan/PG-77777/2021 | EPI_ISL_3888844 | 2021-09-02      |
| hCoV-19/Japan/PG-77778/2021 | EPI_ISL_3888845 | 2021-09-02      |
| hCoV-19/Japan/PG-77779/2021 | EPI_ISL_3888848 | 2021-09-02      |
| hCoV-19/Japan/PG-77780/2021 | EPI_ISL_3888850 | 2021-09-02      |
| hCoV-19/Japan/PG-77781/2021 | EPI_ISL_3888852 | 2021-09-02      |
| hCoV-19/Japan/PG-77782/2021 | EPI_ISL_3888854 | 2021-09-02      |
| hCoV-19/Japan/PG-77783/2021 | EPI_ISL_3888856 | 2021-09-02      |
| hCoV-19/Japan/PG-77784/2021 | EPI_ISL_3888858 | 2021-09-02      |
| hCoV-19/Japan/PG-77785/2021 | EPI_ISL_3888860 | 2021-09-02      |
| hCoV-19/Japan/PG-77786/2021 | EPI_ISL_3888862 | 2021-09-02      |
| hCoV-19/Japan/PG-77787/2021 | EPI_ISL_3888865 | 2021-09-02      |
| hCoV-19/Japan/PG-77788/2021 | EPI_ISL_3888867 | 2021-09-02      |
| hCoV-19/Japan/PG-77789/2021 | EPI_ISL_3888868 | 2021-09-02      |
| hCoV-19/Japan/PG-77790/2021 | EPI_ISL_3888869 | 2021-09-02      |
| hCoV-19/Japan/PG-77791/2021 | EPI_ISL_3888871 | 2021-09-02      |
| hCoV-19/Japan/PG-77792/2021 | EPI_ISL_3888873 | 2021-09-02      |
| hCoV-19/Japan/PG-77793/2021 | EPI_ISL_3888876 | 2021-09-02      |
| hCoV-19/Japan/PG-77794/2021 | EPI_ISL_3888878 | 2021-09-02      |
| hCoV-19/Japan/PG-77795/2021 | EPI_ISL_3888880 | 2021-09-02      |
| hCoV-19/Japan/PG-77796/2021 | EPI_ISL_3888883 | 2021-09-02      |
| hCoV-19/Japan/PG-77797/2021 | EPI_ISL_3888885 | 2021-09-02      |
| hCoV-19/Japan/PG-77798/2021 | EPI_ISL_3888888 | 2021-09-02      |
| hCoV-19/Japan/PG-77799/2021 | EPI_ISL_3888890 | 2021-09-02      |
| hCoV-19/Japan/PG-77800/2021 | EPI_ISL_3888893 | 2021-09-02      |
| hCoV-19/Japan/PG-77801/2021 | EPI_ISL_3888895 | 2021-09-02      |
| hCoV-19/Japan/PG-77802/2021 | EPI_ISL_3888897 | 2021-09-02      |
| hCoV-19/Japan/PG-77803/2021 | EPI_ISL_3888900 | 2021-09-02      |
| hCoV-19/Japan/PG-77804/2021 | EPI_ISL_3888901 | 2021-09-02      |
| hCoV-19/Japan/PG-77805/2021 | EPI_ISL_3888904 | 2021-09-02      |
| hCoV-19/Japan/PG-77806/2021 | EPI_ISL_3888906 | 2021-09-02      |
| hCoV-19/Japan/PG-77807/2021 | EPI_ISL_3888908 | 2021-09-02      |
| hCoV-19/Japan/PG-77808/2021 | EPI_ISL_3888911 | 2021-09-02      |
| hCoV-19/Japan/PG-77809/2021 | EPI_ISL_3888913 | 2021-09-02      |
| hCoV-19/Japan/PG-77810/2021 | EPI_ISL_3888914 | 2021-09-02      |
| hCoV-19/Japan/PG-77811/2021 | EPI_ISL_3888916 | 2021-09-02      |
| hCoV-19/Japan/PG-77812/2021 | EPI_ISL_3888918 | 2021-09-02      |
| hCoV-19/Japan/PG-77813/2021 | EPI_ISL_3888920 | 2021-09-02      |
| hCoV-19/Japan/PG-77814/2021 | EPI_ISL_3888923 | 2021-09-02      |
| hCoV-19/Japan/PG-77815/2021 | EPI_ISL_3888925 | 2021-09-02      |
| hCoV-19/Japan/PG-77816/2021 | EPI_ISL_3888928 | 2021-09-02      |
| hCoV-19/Japan/PG-77817/2021 | EPI_ISL_3888930 | 2021-09-02      |
| hCoV-19/Japan/PG-77818/2021 | EPI_ISL_3888932 | 2021-09-02      |
| hCoV-19/Japan/PG-77819/2021 | EPI_ISL_3888934 | 2021-09-02      |
| hCoV-19/Japan/PG-77820/2021 | EPI_ISL_3888937 | 2021-09-02      |
| hCoV-19/Japan/PG-77821/2021 | EPI_ISL_3888939 | 2021-09-02      |
| hCoV-19/Japan/PG-77822/2021 | EPI_ISL_3888941 | 2021-09-02      |
| hCoV-19/Japan/PG-77823/2021 | EPI_ISL_3888943 | 2021-09-02      |
| hCoV-19/Japan/PG-77824/2021 | EPI_ISL_3888946 | 2021-09-02      |
| hCoV-19/Japan/PG-77825/2021 | EPI_ISL_3888949 | 2021-09-02      |
| hCoV-19/Japan/PG-77826/2021 | EPI_ISL_3888951 | 2021-09-02      |
| hCoV-19/Japan/PG-77827/2021 | EPI_ISL_3888953 | 2021-09-02      |
| hCoV-19/Japan/PG-77828/2021 | EPI_ISL_3870465 | 2021-09-02      |

| virus_name                  | epiID           | submission_date |
|-----------------------------|-----------------|-----------------|
| hCoV-19/Japan/PG-77829/2021 | EPI_ISL_3870466 | 2021-09-02      |
| hCoV-19/Japan/PG-77830/2021 | EPI_ISL_3870467 | 2021-09-02      |
| hCoV-19/Japan/PG-77831/2021 | EPI_ISL_3874308 | 2021-09-02      |
| hCoV-19/Japan/PG-77832/2021 | EPI_ISL_3874309 | 2021-09-02      |
| hCoV-19/Japan/PG-77833/2021 | EPI_ISL_3874310 | 2021-09-02      |
| hCoV-19/Japan/PG-77834/2021 | EPI_ISL_3874311 | 2021-09-02      |
| hCoV-19/Japan/PG-77835/2021 | EPI_ISL_3874312 | 2021-09-02      |
| hCoV-19/Japan/PG-77836/2021 | EPI_ISL_3874313 | 2021-09-02      |
| hCoV-19/Japan/PG-77837/2021 | EPI_ISL_3874314 | 2021-09-02      |
| hCoV-19/Japan/PG-77838/2021 | EPI_ISL_3874315 | 2021-09-02      |
| hCoV-19/Japan/PG-77839/2021 | EPI_ISL_3874316 | 2021-09-02      |
| hCoV-19/Japan/PG-77840/2021 | EPI_ISL_3874317 | 2021-09-02      |
| hCoV-19/Japan/PG-77841/2021 | EPI_ISL_3874318 | 2021-09-02      |
| hCoV-19/Japan/PG-77842/2021 | EPI_ISL_3874319 | 2021-09-02      |
| hCoV-19/Japan/PG-77843/2021 | EPI_ISL_3874320 | 2021-09-02      |
| hCoV-19/Japan/PG-77844/2021 | EPI_ISL_3874321 | 2021-09-02      |
| hCoV-19/Japan/PG-77845/2021 | EPI_ISL_3874322 | 2021-09-02      |
| hCoV-19/Japan/PG-77846/2021 | EPI_ISL_3874182 | 2021-09-02      |
| hCoV-19/Japan/PG-77847/2021 | EPI_ISL_3874183 | 2021-09-02      |
| hCoV-19/Japan/PG-77848/2021 | EPI_ISL_3874184 | 2021-09-02      |
| hCoV-19/Japan/PG-77849/2021 | EPI_ISL_3874185 | 2021-09-02      |
| hCoV-19/Japan/PG-77850/2021 | EPI_ISL_3874186 | 2021-09-02      |
| hCoV-19/Japan/PG-77851/2021 | EPI_ISL_3874187 | 2021-09-02      |
| hCoV-19/Japan/PG-77852/2021 | EPI_ISL_3874188 | 2021-09-02      |
| hCoV-19/Japan/PG-77853/2021 | EPI_ISL_3874189 | 2021-09-02      |
| hCoV-19/Japan/PG-77854/2021 | EPI_ISL_3872402 | 2021-09-02      |
| hCoV-19/Japan/PG-77858/2021 | EPI_ISL_3871260 | 2021-09-02      |
| hCoV-19/Japan/PG-77859/2021 | EPI_ISL_3871261 | 2021-09-02      |
| hCoV-19/Japan/PG-77860/2021 | EPI_ISL_3871262 | 2021-09-02      |
| hCoV-19/Japan/PG-77861/2021 | EPI_ISL_3871263 | 2021-09-02      |
| hCoV-19/Japan/PG-77862/2021 | EPI_ISL_3871264 | 2021-09-02      |
| hCoV-19/Japan/PG-77863/2021 | EPI_ISL_3871265 | 2021-09-02      |
| hCoV-19/Japan/PG-77864/2021 | EPI_ISL_3871266 | 2021-09-02      |
| hCoV-19/Japan/PG-77865/2021 | EPI_ISL_3871267 | 2021-09-02      |
| hCoV-19/Japan/PG-77866/2021 | EPI_ISL_3871268 | 2021-09-02      |
| hCoV-19/Japan/PG-77867/2021 | EPI_ISL_3871269 | 2021-09-02      |
| hCoV-19/Japan/PG-77868/2021 | EPI_ISL_3871270 | 2021-09-02      |
| hCoV-19/Japan/PG-77869/2021 | EPI_ISL_3871271 | 2021-09-02      |
| hCoV-19/Japan/PG-77870/2021 | EPI_ISL_3871272 | 2021-09-02      |
| hCoV-19/Japan/PG-77871/2021 | EPI_ISL_3871273 | 2021-09-02      |
| hCoV-19/Japan/PG-77872/2021 | EPI_ISL_3871274 | 2021-09-02      |
| hCoV-19/Japan/PG-77873/2021 | EPI_ISL_3871275 | 2021-09-02      |
| hCoV-19/Japan/PG-77874/2021 | EPI_ISL_3871276 | 2021-09-02      |
| hCoV-19/Japan/PG-77875/2021 | EPI_ISL_3871277 | 2021-09-02      |
| hCoV-19/Japan/PG-77876/2021 | EPI_ISL_3871278 | 2021-09-02      |
| hCoV-19/Japan/PG-77877/2021 | EPI_ISL_3871279 | 2021-09-02      |
| hCoV-19/Japan/PG-77878/2021 | EPI_ISL_3871280 | 2021-09-02      |
| hCoV-19/Japan/PG-77879/2021 | EPI_ISL_3871281 | 2021-09-02      |
| hCoV-19/Japan/PG-77880/2021 | EPI_ISL_3871282 | 2021-09-02      |
| hCoV-19/Japan/PG-77881/2021 | EPI_ISL_3873724 | 2021-09-02      |
| hCoV-19/Japan/PG-77882/2021 | EPI_ISL_3873725 | 2021-09-02      |
| hCoV-19/Japan/PG-77883/2021 | EPI_ISL_3873726 | 2021-09-02      |
| hCoV-19/Japan/PG-77884/2021 | EPI_ISL_3873727 | 2021-09-02      |
| hCoV-19/Japan/PG-77885/2021 | EPI_ISL_3873728 | 2021-09-02      |

| virus_name                  | epiID           | submission_date |
|-----------------------------|-----------------|-----------------|
| hCoV-19/Japan/PG-77886/2021 | EPI_ISL_3873729 | 2021-09-02      |
| hCoV-19/Japan/PG-77887/2021 | EPI_ISL_3873730 | 2021-09-02      |
| hCoV-19/Japan/PG-77888/2021 | EPI_ISL_3873731 | 2021-09-02      |
| hCoV-19/Japan/PG-77889/2021 | EPI_ISL_3873732 | 2021-09-02      |
| hCoV-19/Japan/PG-77890/2021 | EPI_ISL_3873733 | 2021-09-02      |
| hCoV-19/Japan/PG-77891/2021 | EPI_ISL_3873734 | 2021-09-02      |
| hCoV-19/Japan/PG-77892/2021 | EPI_ISL_3873735 | 2021-09-02      |
| hCoV-19/Japan/PG-77893/2021 | EPI_ISL_3873736 | 2021-09-02      |
| hCoV-19/Japan/PG-77894/2021 | EPI_ISL_3873737 | 2021-09-02      |
| hCoV-19/Japan/PG-77895/2021 | EPI_ISL_3873738 | 2021-09-02      |
| hCoV-19/Japan/PG-77896/2021 | EPI_ISL_3873739 | 2021-09-02      |
| hCoV-19/Japan/PG-77897/2021 | EPI_ISL_3873740 | 2021-09-02      |
| hCoV-19/Japan/PG-77898/2021 | EPI_ISL_3873741 | 2021-09-02      |
| hCoV-19/Japan/PG-77899/2021 | EPI_ISL_3873742 | 2021-09-02      |
| hCoV-19/Japan/PG-77900/2021 | EPI_ISL_3873743 | 2021-09-02      |
| hCoV-19/Japan/PG-77901/2021 | EPI_ISL_3873744 | 2021-09-02      |
| hCoV-19/Japan/PG-77902/2021 | EPI_ISL_3873745 | 2021-09-02      |
| hCoV-19/Japan/PG-77903/2021 | EPI_ISL_3873746 | 2021-09-02      |
| hCoV-19/Japan/PG-77904/2021 | EPI_ISL_3873747 | 2021-09-02      |
| hCoV-19/Japan/PG-77905/2021 | EPI_ISL_3873748 | 2021-09-02      |
| hCoV-19/Japan/PG-77906/2021 | EPI_ISL_3873749 | 2021-09-02      |
| hCoV-19/Japan/PG-77907/2021 | EPI_ISL_3873750 | 2021-09-02      |
| hCoV-19/Japan/PG-77908/2021 | EPI_ISL_3873751 | 2021-09-02      |
| hCoV-19/Japan/PG-77909/2021 | EPI_ISL_3873752 | 2021-09-02      |
| hCoV-19/Japan/PG-77910/2021 | EPI_ISL_3873753 | 2021-09-02      |
| hCoV-19/Japan/PG-77911/2021 | EPI_ISL_3873754 | 2021-09-02      |
| hCoV-19/Japan/PG-77912/2021 | EPI_ISL_3873755 | 2021-09-02      |
| hCoV-19/Japan/PG-77913/2021 | EPI_ISL_3873756 | 2021-09-02      |
| hCoV-19/Japan/PG-77914/2021 | EPI_ISL_3873757 | 2021-09-02      |
| hCoV-19/Japan/PG-77915/2021 | EPI_ISL_3873758 | 2021-09-02      |
| hCoV-19/Japan/PG-77916/2021 | EPI_ISL_3873759 | 2021-09-02      |
| hCoV-19/Japan/PG-77917/2021 | EPI_ISL_3873760 | 2021-09-02      |
| hCoV-19/Japan/PG-77918/2021 | EPI_ISL_3873761 | 2021-09-02      |
| hCoV-19/Japan/PG-77919/2021 | EPI_ISL_3873762 | 2021-09-02      |
| hCoV-19/Japan/PG-77920/2021 | EPI_ISL_3873763 | 2021-09-02      |
| hCoV-19/Japan/PG-77921/2021 | EPI_ISL_3873764 | 2021-09-02      |
| hCoV-19/Japan/PG-77922/2021 | EPI_ISL_3873765 | 2021-09-02      |
| hCoV-19/Japan/PG-77923/2021 | EPI_ISL_3873766 | 2021-09-02      |
| hCoV-19/Japan/PG-77924/2021 | EPI_ISL_3873767 | 2021-09-02      |
| hCoV-19/Japan/PG-77925/2021 | EPI_ISL_3873768 | 2021-09-02      |
| hCoV-19/Japan/PG-77926/2021 | EPI_ISL_3875552 | 2021-09-02      |
| hCoV-19/Japan/PG-77927/2021 | EPI_ISL_3875553 | 2021-09-02      |
| hCoV-19/Japan/PG-77928/2021 | EPI_ISL_3875554 | 2021-09-02      |
| hCoV-19/Japan/PG-77929/2021 | EPI_ISL_3875555 | 2021-09-02      |
| hCoV-19/Japan/PG-77930/2021 | EPI_ISL_3875556 | 2021-09-02      |
| hCoV-19/Japan/PG-77931/2021 | EPI_ISL_3875557 | 2021-09-02      |
| hCoV-19/Japan/PG-77932/2021 | EPI_ISL_3875558 | 2021-09-02      |
| hCoV-19/Japan/PG-77933/2021 | EPI_ISL_3875559 | 2021-09-02      |
| hCoV-19/Japan/PG-77934/2021 | EPI_ISL_3875560 | 2021-09-02      |
| hCoV-19/Japan/PG-77935/2021 | EPI_ISL_3875561 | 2021-09-02      |
| hCoV-19/Japan/PG-77936/2021 | EPI_ISL_3875562 | 2021-09-02      |
| hCoV-19/Japan/PG-77937/2021 | EPI_ISL_3875563 | 2021-09-02      |
| hCoV-19/Japan/PG-77938/2021 | EPI_ISL_3875564 | 2021-09-02      |
| hCoV-19/Japan/PG-77939/2021 | EPI_ISL_3875565 | 2021-09-02      |

| virus_name                  | epiID           | submission_date |
|-----------------------------|-----------------|-----------------|
| hCoV-19/Japan/PG-77940/2021 | EPI_ISL_3875566 | 2021-09-02      |
| hCoV-19/Japan/PG-77941/2021 | EPI_ISL_3875567 | 2021-09-02      |
| hCoV-19/Japan/PG-77942/2021 | EPI_ISL_3875568 | 2021-09-02      |
| hCoV-19/Japan/PG-77943/2021 | EPI_ISL_3875569 | 2021-09-02      |
| hCoV-19/Japan/PG-77944/2021 | EPI_ISL_3875570 | 2021-09-02      |
| hCoV-19/Japan/PG-77945/2021 | EPI_ISL_3875571 | 2021-09-02      |
| hCoV-19/Japan/PG-77946/2021 | EPI_ISL_3875572 | 2021-09-02      |
| hCoV-19/Japan/PG-77947/2021 | EPI_ISL_3875573 | 2021-09-02      |
| hCoV-19/Japan/PG-77948/2021 | EPI_ISL_3875574 | 2021-09-02      |
| hCoV-19/Japan/PG-77949/2021 | EPI_ISL_3875575 | 2021-09-02      |
| hCoV-19/Japan/PG-77950/2021 | EPI_ISL_3875576 | 2021-09-02      |
| hCoV-19/Japan/PG-77951/2021 | EPI_ISL_3875577 | 2021-09-02      |
| hCoV-19/Japan/PG-77952/2021 | EPI_ISL_3875578 | 2021-09-02      |
| hCoV-19/Japan/PG-77953/2021 | EPI_ISL_3875579 | 2021-09-02      |
| hCoV-19/Japan/PG-77954/2021 | EPI_ISL_3875580 | 2021-09-02      |
| hCoV-19/Japan/PG-77955/2021 | EPI_ISL_3875581 | 2021-09-02      |
| hCoV-19/Japan/PG-77956/2021 | EPI_ISL_3875582 | 2021-09-02      |
| hCoV-19/Japan/PG-77957/2021 | EPI_ISL_3875583 | 2021-09-02      |
| hCoV-19/Japan/PG-77958/2021 | EPI_ISL_3875584 | 2021-09-02      |
| hCoV-19/Japan/PG-77959/2021 | EPI_ISL_3875585 | 2021-09-02      |
| hCoV-19/Japan/PG-77960/2021 | EPI_ISL_3875586 | 2021-09-02      |
| hCoV-19/Japan/PG-77961/2021 | EPI_ISL_3875587 | 2021-09-02      |
| hCoV-19/Japan/PG-77962/2021 | EPI_ISL_3875588 | 2021-09-02      |
| hCoV-19/Japan/PG-77963/2021 | EPI_ISL_3875589 | 2021-09-02      |
| hCoV-19/Japan/PG-77964/2021 | EPI_ISL_3875590 | 2021-09-02      |
| hCoV-19/Japan/PG-77965/2021 | EPI_ISL_3875591 | 2021-09-02      |
| hCoV-19/Japan/PG-77966/2021 | EPI_ISL_3875592 | 2021-09-02      |
| hCoV-19/Japan/PG-77967/2021 | EPI_ISL_3875593 | 2021-09-02      |
| hCoV-19/Japan/PG-77968/2021 | EPI_ISL_3875594 | 2021-09-02      |
| hCoV-19/Japan/PG-77969/2021 | EPI_ISL_3875595 | 2021-09-02      |
| hCoV-19/Japan/PG-77970/2021 | EPI_ISL_3875596 | 2021-09-02      |
| hCoV-19/Japan/PG-77971/2021 | EPI_ISL_3875597 | 2021-09-02      |
| hCoV-19/Japan/PG-77972/2021 | EPI_ISL_3871775 | 2021-09-02      |
| hCoV-19/Japan/PG-77973/2021 | EPI_ISL_3871776 | 2021-09-02      |
| hCoV-19/Japan/PG-77974/2021 | EPI_ISL_3871777 | 2021-09-02      |
| hCoV-19/Japan/PG-77975/2021 | EPI_ISL_3871778 | 2021-09-02      |
| hCoV-19/Japan/PG-77976/2021 | EPI_ISL_3871779 | 2021-09-02      |
| hCoV-19/Japan/PG-77977/2021 | EPI_ISL_3871780 | 2021-09-02      |
| hCoV-19/Japan/PG-77978/2021 | EPI_ISL_3871781 | 2021-09-02      |
| hCoV-19/Japan/PG-77979/2021 | EPI_ISL_3871782 | 2021-09-02      |
| hCoV-19/Japan/PG-77980/2021 | EPI_ISL_3871783 | 2021-09-02      |
| hCoV-19/Japan/PG-77981/2021 | EPI_ISL_3871784 | 2021-09-02      |
| hCoV-19/Japan/PG-77982/2021 | EPI_ISL_3871785 | 2021-09-02      |
| hCoV-19/Japan/PG-77983/2021 | EPI_ISL_3871786 | 2021-09-02      |
| hCoV-19/Japan/PG-77984/2021 | EPI_ISL_3871787 | 2021-09-02      |
| hCoV-19/Japan/PG-77985/2021 | EPI_ISL_3871788 | 2021-09-02      |
| hCoV-19/Japan/PG-77986/2021 | EPI_ISL_3871789 | 2021-09-02      |
| hCoV-19/Japan/PG-77987/2021 | EPI_ISL_3871790 | 2021-09-02      |
| hCoV-19/Japan/PG-77988/2021 | EPI_ISL_3871791 | 2021-09-02      |
| hCoV-19/Japan/PG-77989/2021 | EPI_ISL_3871792 | 2021-09-02      |
| hCoV-19/Japan/PG-77990/2021 | EPI_ISL_3871793 | 2021-09-02      |
| hCoV-19/Japan/PG-77991/2021 | EPI_ISL_3871794 | 2021-09-02      |
| hCoV-19/Japan/PG-77992/2021 | EPI_ISL_3871795 | 2021-09-02      |
| hCoV-19/Japan/PG-77993/2021 | EPI_ISL_3871796 | 2021-09-02      |

| virus_name                  | epiID           | submission_date |
|-----------------------------|-----------------|-----------------|
| hCoV-19/Japan/PG-77994/2021 | EPI_ISL_3871797 | 2021-09-02      |
| hCoV-19/Japan/PG-77995/2021 | EPI_ISL_3876072 | 2021-09-02      |
| hCoV-19/Japan/PG-77996/2021 | EPI_ISL_3876073 | 2021-09-02      |
| hCoV-19/Japan/PG-77997/2021 | EPI_ISL_3876074 | 2021-09-02      |
| hCoV-19/Japan/PG-77998/2021 | EPI_ISL_3876075 | 2021-09-02      |
| hCoV-19/Japan/PG-77999/2021 | EPI_ISL_3876076 | 2021-09-02      |
| hCoV-19/Japan/PG-78000/2021 | EPI_ISL_3876077 | 2021-09-02      |
| hCoV-19/Japan/PG-78001/2021 | EPI_ISL_3876078 | 2021-09-02      |
| hCoV-19/Japan/PG-78002/2021 | EPI_ISL_3876079 | 2021-09-02      |
| hCoV-19/Japan/PG-78003/2021 | EPI_ISL_3876080 | 2021-09-02      |
| hCoV-19/Japan/PG-78004/2021 | EPI_ISL_3876081 | 2021-09-02      |
| hCoV-19/Japan/PG-78005/2021 | EPI_ISL_3876082 | 2021-09-02      |
| hCoV-19/Japan/PG-78006/2021 | EPI_ISL_3876083 | 2021-09-02      |
| hCoV-19/Japan/PG-78007/2021 | EPI_ISL_3876084 | 2021-09-02      |
| hCoV-19/Japan/PG-78008/2021 | EPI_ISL_3876085 | 2021-09-02      |
| hCoV-19/Japan/PG-78009/2021 | EPI_ISL_3876086 | 2021-09-02      |
| hCoV-19/Japan/PG-78010/2021 | EPI_ISL_3876087 | 2021-09-02      |
| hCoV-19/Japan/PG-78011/2021 | EPI_ISL_3876088 | 2021-09-02      |
| hCoV-19/Japan/PG-78012/2021 | EPI_ISL_3876089 | 2021-09-02      |
| hCoV-19/Japan/PG-78013/2021 | EPI_ISL_3876090 | 2021-09-02      |
| hCoV-19/Japan/PG-78014/2021 | EPI_ISL_3876091 | 2021-09-02      |
| hCoV-19/Japan/PG-78015/2021 | EPI_ISL_3876092 | 2021-09-02      |
| hCoV-19/Japan/PG-78016/2021 | EPI_ISL_3876093 | 2021-09-02      |
| hCoV-19/Japan/PG-78017/2021 | EPI_ISL_3876094 | 2021-09-02      |
| hCoV-19/Japan/PG-78018/2021 | EPI_ISL_3876095 | 2021-09-02      |
| hCoV-19/Japan/PG-78019/2021 | EPI_ISL_3876096 | 2021-09-02      |
| hCoV-19/Japan/PG-78020/2021 | EPI_ISL_3876097 | 2021-09-02      |
| hCoV-19/Japan/PG-78021/2021 | EPI_ISL_3876098 | 2021-09-02      |
| hCoV-19/Japan/PG-78022/2021 | EPI_ISL_3876099 | 2021-09-02      |
| hCoV-19/Japan/PG-78023/2021 | EPI_ISL_3876100 | 2021-09-02      |
| hCoV-19/Japan/PG-78024/2021 | EPI_ISL_3876101 | 2021-09-02      |
| hCoV-19/Japan/PG-78025/2021 | EPI_ISL_3876102 | 2021-09-02      |
| hCoV-19/Japan/PG-78026/2021 | EPI_ISL_3876103 | 2021-09-02      |
| hCoV-19/Japan/PG-78027/2021 | EPI_ISL_3875847 | 2021-09-02      |
| hCoV-19/Japan/PG-78028/2021 | EPI_ISL_3875848 | 2021-09-02      |
| hCoV-19/Japan/PG-78029/2021 | EPI_ISL_3875849 | 2021-09-02      |
| hCoV-19/Japan/PG-78030/2021 | EPI_ISL_3875850 | 2021-09-02      |
| hCoV-19/Japan/PG-78031/2021 | EPI_ISL_3875851 | 2021-09-02      |
| hCoV-19/Japan/PG-78032/2021 | EPI_ISL_3875852 | 2021-09-02      |
| hCoV-19/Japan/PG-78033/2021 | EPI_ISL_3875853 | 2021-09-02      |
| hCoV-19/Japan/PG-78034/2021 | EPI_ISL_3875854 | 2021-09-02      |
| hCoV-19/Japan/PG-78035/2021 | EPI_ISL_3875855 | 2021-09-02      |
| hCoV-19/Japan/PG-78036/2021 | EPI_ISL_3875856 | 2021-09-02      |
| hCoV-19/Japan/PG-78037/2021 | EPI_ISL_3875857 | 2021-09-02      |
| hCoV-19/Japan/PG-78038/2021 | EPI_ISL_3875858 | 2021-09-02      |
| hCoV-19/Japan/PG-78039/2021 | EPI_ISL_3875859 | 2021-09-02      |
| hCoV-19/Japan/PG-78040/2021 | EPI_ISL_3875860 | 2021-09-02      |
| hCoV-19/Japan/PG-78041/2021 | EPI_ISL_3875861 | 2021-09-02      |
| hCoV-19/Japan/PG-78042/2021 | EPI_ISL_3875862 | 2021-09-02      |
| hCoV-19/Japan/PG-78043/2021 | EPI_ISL_3875863 | 2021-09-02      |
| hCoV-19/Japan/PG-78044/2021 | EPI_ISL_3875864 | 2021-09-02      |
| hCoV-19/Japan/PG-78045/2021 | EPI_ISL_3875865 | 2021-09-02      |
| hCoV-19/Japan/PG-78046/2021 | EPI_ISL_3875866 | 2021-09-02      |
| hCoV-19/Japan/PG-78047/2021 | EPI_ISL_3871369 | 2021-09-02      |



| virus_name                  | epiID           | submission_date |
|-----------------------------|-----------------|-----------------|
| hCoV-19/Japan/PG-78048/2021 | EPI_ISL_3871370 | 2021-09-02      |
| hCoV-19/Japan/PG-78049/2021 | EPI_ISL_3871371 | 2021-09-02      |
| hCoV-19/Japan/PG-78050/2021 | EPI_ISL_3871372 | 2021-09-02      |
| hCoV-19/Japan/PG-78051/2021 | EPI_ISL_3871373 | 2021-09-02      |
| hCoV-19/Japan/PG-78052/2021 | EPI_ISL_3871374 | 2021-09-02      |
| hCoV-19/Japan/PG-78053/2021 | EPI_ISL_3872403 | 2021-09-02      |
| hCoV-19/Japan/PG-78054/2021 | EPI_ISL_3872404 | 2021-09-02      |
| hCoV-19/Japan/PG-78055/2021 | EPI_ISL_3872405 | 2021-09-02      |
| hCoV-19/Japan/PG-78056/2021 | EPI_ISL_3872406 | 2021-09-02      |
| hCoV-19/Japan/PG-78057/2021 | EPI_ISL_3872407 | 2021-09-02      |
| hCoV-19/Japan/PG-78058/2021 | EPI_ISL_3872408 | 2021-09-02      |
| hCoV-19/Japan/PG-78059/2021 | EPI_ISL_3872409 | 2021-09-02      |
| hCoV-19/Japan/PG-78060/2021 | EPI_ISL_3872410 | 2021-09-02      |
| hCoV-19/Japan/PG-78061/2021 | EPI_ISL_3872411 | 2021-09-02      |
| hCoV-19/Japan/PG-78062/2021 | EPI_ISL_3872412 | 2021-09-02      |
| hCoV-19/Japan/PG-78063/2021 | EPI_ISL_3872413 | 2021-09-02      |
| hCoV-19/Japan/PG-78064/2021 | EPI_ISL_3872414 | 2021-09-02      |
| hCoV-19/Japan/PG-78065/2021 | EPI_ISL_3872415 | 2021-09-02      |
| hCoV-19/Japan/PG-78066/2021 | EPI_ISL_3872416 | 2021-09-02      |
| hCoV-19/Japan/PG-78067/2021 | EPI_ISL_3872417 | 2021-09-02      |
| hCoV-19/Japan/PG-78068/2021 | EPI_ISL_3872418 | 2021-09-02      |
| hCoV-19/Japan/PG-78069/2021 | EPI_ISL_3872419 | 2021-09-02      |
| hCoV-19/Japan/PG-78070/2021 | EPI_ISL_3872420 | 2021-09-02      |
| hCoV-19/Japan/PG-78071/2021 | EPI_ISL_3872421 | 2021-09-02      |
| hCoV-19/Japan/PG-78072/2021 | EPI_ISL_3872422 | 2021-09-02      |
| hCoV-19/Japan/PG-78073/2021 | EPI_ISL_3872423 | 2021-09-02      |
| hCoV-19/Japan/PG-78074/2021 | EPI_ISL_3872424 | 2021-09-02      |
| hCoV-19/Japan/PG-78075/2021 | EPI_ISL_3872425 | 2021-09-02      |
| hCoV-19/Japan/PG-78076/2021 | EPI_ISL_3872426 | 2021-09-02      |
| hCoV-19/Japan/PG-78077/2021 | EPI_ISL_3871948 | 2021-09-02      |
| hCoV-19/Japan/PG-78078/2021 | EPI_ISL_3871949 | 2021-09-02      |
| hCoV-19/Japan/PG-78079/2021 | EPI_ISL_3871950 | 2021-09-02      |
| hCoV-19/Japan/PG-78080/2021 | EPI_ISL_3871951 | 2021-09-02      |
| hCoV-19/Japan/PG-78081/2021 | EPI_ISL_3871952 | 2021-09-02      |
| hCoV-19/Japan/PG-78082/2021 | EPI_ISL_3871953 | 2021-09-02      |
| hCoV-19/Japan/PG-78083/2021 | EPI_ISL_3871452 | 2021-09-02      |
| hCoV-19/Japan/PG-78084/2021 | EPI_ISL_3871453 | 2021-09-02      |
| hCoV-19/Japan/PG-78085/2021 | EPI_ISL_3871454 | 2021-09-02      |
| hCoV-19/Japan/PG-78086/2021 | EPI_ISL_3871455 | 2021-09-02      |
| hCoV-19/Japan/PG-78087/2021 | EPI_ISL_3871456 | 2021-09-02      |
| hCoV-19/Japan/PG-78088/2021 | EPI_ISL_3874076 | 2021-09-02      |
| hCoV-19/Japan/PG-78089/2021 | EPI_ISL_3874077 | 2021-09-02      |
| hCoV-19/Japan/PG-78090/2021 | EPI_ISL_3874078 | 2021-09-02      |
| hCoV-19/Japan/PG-78091/2021 | EPI_ISL_3874079 | 2021-09-02      |
| hCoV-19/Japan/PG-78092/2021 | EPI_ISL_3874080 | 2021-09-02      |
| hCoV-19/Japan/PG-78093/2021 | EPI_ISL_3874081 | 2021-09-02      |
| hCoV-19/Japan/PG-78094/2021 | EPI_ISL_3874082 | 2021-09-02      |
| hCoV-19/Japan/PG-78095/2021 | EPI_ISL_3874083 | 2021-09-02      |
| hCoV-19/Japan/PG-78096/2021 | EPI_ISL_3874084 | 2021-09-02      |
| hCoV-19/Japan/PG-78097/2021 | EPI_ISL_3874086 | 2021-09-02      |
| hCoV-19/Japan/PG-78098/2021 | EPI_ISL_3874497 | 2021-09-02      |
| hCoV-19/Japan/PG-78099/2021 | EPI_ISL_3874498 | 2021-09-02      |
| hCoV-19/Japan/PG-78100/2021 | EPI_ISL_3874499 | 2021-09-02      |
| hCoV-19/Japan/PG-78101/2021 | EPI_ISL_3874500 | 2021-09-02      |

| virus_name                  | epiID           | submission_date |
|-----------------------------|-----------------|-----------------|
| hCoV-19/Japan/PG-78102/2021 | EPI_ISL_3874501 | 2021-09-02      |
| hCoV-19/Japan/PG-78103/2021 | EPI_ISL_3874502 | 2021-09-02      |
| hCoV-19/Japan/PG-78104/2021 | EPI_ISL_3874503 | 2021-09-02      |
| hCoV-19/Japan/PG-78105/2021 | EPI_ISL_3874504 | 2021-09-02      |
| hCoV-19/Japan/PG-78106/2021 | EPI_ISL_3874505 | 2021-09-02      |
| hCoV-19/Japan/PG-78107/2021 | EPI_ISL_3874506 | 2021-09-02      |
| hCoV-19/Japan/PG-78108/2021 | EPI_ISL_3874507 | 2021-09-02      |
| hCoV-19/Japan/PG-78109/2021 | EPI_ISL_3874508 | 2021-09-02      |
| hCoV-19/Japan/PG-78110/2021 | EPI_ISL_3873965 | 2021-09-02      |
| hCoV-19/Japan/PG-78111/2021 | EPI_ISL_3873966 | 2021-09-02      |
| hCoV-19/Japan/PG-78112/2021 | EPI_ISL_3873967 | 2021-09-02      |
| hCoV-19/Japan/PG-78113/2021 | EPI_ISL_3873968 | 2021-09-02      |
| hCoV-19/Japan/PG-78114/2021 | EPI_ISL_3873969 | 2021-09-02      |
| hCoV-19/Japan/PG-78115/2021 | EPI_ISL_3873970 | 2021-09-02      |
| hCoV-19/Japan/PG-78116/2021 | EPI_ISL_3873971 | 2021-09-02      |
| hCoV-19/Japan/PG-78117/2021 | EPI_ISL_3873972 | 2021-09-02      |
| hCoV-19/Japan/PG-78118/2021 | EPI_ISL_3873973 | 2021-09-02      |
| hCoV-19/Japan/PG-78119/2021 | EPI_ISL_3873974 | 2021-09-02      |
| hCoV-19/Japan/PG-78120/2021 | EPI_ISL_3873975 | 2021-09-02      |
| hCoV-19/Japan/PG-78121/2021 | EPI_ISL_3873976 | 2021-09-02      |
| hCoV-19/Japan/PG-78122/2021 | EPI_ISL_3873977 | 2021-09-02      |
| hCoV-19/Japan/PG-78123/2021 | EPI_ISL_3873978 | 2021-09-02      |
| hCoV-19/Japan/PG-78124/2021 | EPI_ISL_3873979 | 2021-09-02      |
| hCoV-19/Japan/PG-78125/2021 | EPI_ISL_3873980 | 2021-09-02      |
| hCoV-19/Japan/PG-78126/2021 | EPI_ISL_3873981 | 2021-09-02      |
| hCoV-19/Japan/PG-78127/2021 | EPI_ISL_3873982 | 2021-09-02      |
| hCoV-19/Japan/PG-78128/2021 | EPI_ISL_3873983 | 2021-09-02      |
| hCoV-19/Japan/PG-78129/2021 | EPI_ISL_3871052 | 2021-09-02      |
| hCoV-19/Japan/PG-78130/2021 | EPI_ISL_3871053 | 2021-09-02      |
| hCoV-19/Japan/PG-78131/2021 | EPI_ISL_3871054 | 2021-09-02      |
| hCoV-19/Japan/PG-78132/2021 | EPI_ISL_3871055 | 2021-09-02      |
| hCoV-19/Japan/PG-78133/2021 | EPI_ISL_3871056 | 2021-09-02      |
| hCoV-19/Japan/PG-78134/2021 | EPI_ISL_3871057 | 2021-09-02      |
| hCoV-19/Japan/PG-78135/2021 | EPI_ISL_3871058 | 2021-09-02      |
| hCoV-19/Japan/PG-78136/2021 | EPI_ISL_3871059 | 2021-09-02      |
| hCoV-19/Japan/PG-78137/2021 | EPI_ISL_3871060 | 2021-09-02      |
| hCoV-19/Japan/PG-78138/2021 | EPI_ISL_3871061 | 2021-09-02      |
| hCoV-19/Japan/PG-78139/2021 | EPI_ISL_3871062 | 2021-09-02      |
| hCoV-19/Japan/PG-78140/2021 | EPI_ISL_3871063 | 2021-09-02      |
| hCoV-19/Japan/PG-78141/2021 | EPI_ISL_3871064 | 2021-09-02      |
| hCoV-19/Japan/PG-78142/2021 | EPI_ISL_3871065 | 2021-09-02      |
| hCoV-19/Japan/PG-78143/2021 | EPI_ISL_3871066 | 2021-09-02      |
| hCoV-19/Japan/PG-78144/2021 | EPI_ISL_3871067 | 2021-09-02      |
| hCoV-19/Japan/PG-78145/2021 | EPI_ISL_3871068 | 2021-09-02      |
| hCoV-19/Japan/PG-78146/2021 | EPI_ISL_3871069 | 2021-09-02      |
| hCoV-19/Japan/PG-78147/2021 | EPI_ISL_3871070 | 2021-09-02      |
| hCoV-19/Japan/PG-78148/2021 | EPI_ISL_3871071 | 2021-09-02      |
| hCoV-19/Japan/PG-78149/2021 | EPI_ISL_3871072 | 2021-09-02      |
| hCoV-19/Japan/PG-78150/2021 | EPI_ISL_3871073 | 2021-09-02      |
| hCoV-19/Japan/PG-78151/2021 | EPI_ISL_3874323 | 2021-09-02      |
| hCoV-19/Japan/PG-78152/2021 | EPI_ISL_3874324 | 2021-09-02      |
| hCoV-19/Japan/PG-78153/2021 | EPI_ISL_3874325 | 2021-09-02      |
| hCoV-19/Japan/PG-78154/2021 | EPI_ISL_3874326 | 2021-09-02      |
| hCoV-19/Japan/PG-78155/2021 | EPI_ISL_3874327 | 2021-09-02      |

| virus_name                  | epiID           | submission_date |
|-----------------------------|-----------------|-----------------|
| hCoV-19/Japan/PG-78156/2021 | EPI_ISL_3874328 | 2021-09-02      |
| hCoV-19/Japan/PG-78157/2021 | EPI_ISL_3874329 | 2021-09-02      |
| hCoV-19/Japan/PG-78158/2021 | EPI_ISL_3874330 | 2021-09-02      |
| hCoV-19/Japan/PG-78159/2021 | EPI_ISL_3874331 | 2021-09-02      |
| hCoV-19/Japan/PG-78160/2021 | EPI_ISL_3874332 | 2021-09-02      |
| hCoV-19/Japan/PG-78161/2021 | EPI_ISL_3873377 | 2021-09-02      |
| hCoV-19/Japan/PG-78162/2021 | EPI_ISL_3873378 | 2021-09-02      |
| hCoV-19/Japan/PG-78163/2021 | EPI_ISL_3873379 | 2021-09-02      |
| hCoV-19/Japan/PG-78164/2021 | EPI_ISL_3873380 | 2021-09-02      |
| hCoV-19/Japan/PG-78165/2021 | EPI_ISL_3873381 | 2021-09-02      |
| hCoV-19/Japan/PG-78166/2021 | EPI_ISL_3873382 | 2021-09-02      |
| hCoV-19/Japan/PG-78167/2021 | EPI_ISL_3873383 | 2021-09-02      |
| hCoV-19/Japan/PG-78168/2021 | EPI_ISL_3873384 | 2021-09-02      |
| hCoV-19/Japan/PG-78169/2021 | EPI_ISL_3873385 | 2021-09-02      |
| hCoV-19/Japan/PG-78170/2021 | EPI_ISL_3873386 | 2021-09-02      |
| hCoV-19/Japan/PG-78171/2021 | EPI_ISL_3873387 | 2021-09-02      |
| hCoV-19/Japan/PG-78172/2021 | EPI_ISL_3873388 | 2021-09-02      |
| hCoV-19/Japan/PG-78173/2021 | EPI_ISL_3873389 | 2021-09-02      |
| hCoV-19/Japan/PG-78174/2021 | EPI_ISL_3873390 | 2021-09-02      |
| hCoV-19/Japan/PG-78175/2021 | EPI_ISL_3873391 | 2021-09-02      |
| hCoV-19/Japan/PG-78176/2021 | EPI_ISL_3873392 | 2021-09-02      |
| hCoV-19/Japan/PG-78177/2021 | EPI_ISL_3874190 | 2021-09-02      |
| hCoV-19/Japan/PG-78178/2021 | EPI_ISL_3874191 | 2021-09-02      |
| hCoV-19/Japan/PG-78179/2021 | EPI_ISL_3874192 | 2021-09-02      |
| hCoV-19/Japan/PG-78180/2021 | EPI_ISL_3874193 | 2021-09-02      |
| hCoV-19/Japan/PG-78181/2021 | EPI_ISL_3874194 | 2021-09-02      |
| hCoV-19/Japan/PG-78182/2021 | EPI_ISL_3874195 | 2021-09-02      |
| hCoV-19/Japan/PG-78183/2021 | EPI_ISL_3874196 | 2021-09-02      |
| hCoV-19/Japan/PG-78184/2021 | EPI_ISL_3874197 | 2021-09-02      |
| hCoV-19/Japan/PG-78185/2021 | EPI_ISL_3874198 | 2021-09-02      |
| hCoV-19/Japan/PG-78186/2021 | EPI_ISL_3874199 | 2021-09-02      |
| hCoV-19/Japan/PG-78187/2021 | EPI_ISL_3874200 | 2021-09-02      |
| hCoV-19/Japan/PG-78188/2021 | EPI_ISL_3874201 | 2021-09-02      |
| hCoV-19/Japan/PG-78189/2021 | EPI_ISL_3874202 | 2021-09-02      |
| hCoV-19/Japan/PG-78190/2021 | EPI_ISL_3874203 | 2021-09-02      |
| hCoV-19/Japan/PG-78191/2021 | EPI_ISL_3874204 | 2021-09-02      |
| hCoV-19/Japan/PG-78192/2021 | EPI_ISL_3874205 | 2021-09-02      |
| hCoV-19/Japan/PG-78193/2021 | EPI_ISL_3874206 | 2021-09-02      |
| hCoV-19/Japan/PG-78194/2021 | EPI_ISL_3874207 | 2021-09-02      |
| hCoV-19/Japan/PG-78195/2021 | EPI_ISL_3874208 | 2021-09-02      |
| hCoV-19/Japan/PG-78196/2021 | EPI_ISL_3874209 | 2021-09-02      |
| hCoV-19/Japan/PG-78197/2021 | EPI_ISL_3874210 | 2021-09-02      |
| hCoV-19/Japan/PG-78198/2021 | EPI_ISL_3874211 | 2021-09-02      |
| hCoV-19/Japan/PG-78199/2021 | EPI_ISL_3874212 | 2021-09-02      |
| hCoV-19/Japan/PG-78200/2021 | EPI_ISL_3874545 | 2021-09-02      |
| hCoV-19/Japan/PG-78201/2021 | EPI_ISL_3874546 | 2021-09-02      |
| hCoV-19/Japan/PG-78202/2021 | EPI_ISL_3874547 | 2021-09-02      |
| hCoV-19/Japan/PG-78203/2021 | EPI_ISL_3874548 | 2021-09-02      |
| hCoV-19/Japan/PG-78204/2021 | EPI_ISL_3874549 | 2021-09-02      |
| hCoV-19/Japan/PG-78205/2021 | EPI_ISL_3874550 | 2021-09-02      |
| hCoV-19/Japan/PG-78206/2021 | EPI_ISL_3874551 | 2021-09-02      |
| hCoV-19/Japan/PG-78207/2021 | EPI_ISL_3874552 | 2021-09-02      |
| hCoV-19/Japan/PG-78208/2021 | EPI_ISL_3874553 | 2021-09-02      |
| hCoV-19/Japan/PG-78209/2021 | EPI_ISL_3874554 | 2021-09-02      |

| virus_name                  | epiID           | submission_date |
|-----------------------------|-----------------|-----------------|
| hCoV-19/Japan/PG-78210/2021 | EPI_ISL_3874555 | 2021-09-02      |
| hCoV-19/Japan/PG-78211/2021 | EPI_ISL_3874556 | 2021-09-02      |
| hCoV-19/Japan/PG-78212/2021 | EPI_ISL_3874557 | 2021-09-02      |
| hCoV-19/Japan/PG-78213/2021 | EPI_ISL_3874558 | 2021-09-02      |
| hCoV-19/Japan/PG-78214/2021 | EPI_ISL_3874559 | 2021-09-02      |
| hCoV-19/Japan/PG-78215/2021 | EPI_ISL_3874560 | 2021-09-02      |
| hCoV-19/Japan/PG-78216/2021 | EPI_ISL_3874561 | 2021-09-02      |
| hCoV-19/Japan/PG-78217/2021 | EPI_ISL_3874562 | 2021-09-02      |
| hCoV-19/Japan/PG-78218/2021 | EPI_ISL_3874563 | 2021-09-02      |
| hCoV-19/Japan/PG-78219/2021 | EPI_ISL_3874564 | 2021-09-02      |
| hCoV-19/Japan/PG-78220/2021 | EPI_ISL_3874565 | 2021-09-02      |
| hCoV-19/Japan/PG-78221/2021 | EPI_ISL_3874566 | 2021-09-02      |
| hCoV-19/Japan/PG-78222/2021 | EPI_ISL_3874567 | 2021-09-02      |
| hCoV-19/Japan/PG-78223/2021 | EPI_ISL_3870964 | 2021-09-02      |
| hCoV-19/Japan/PG-78224/2021 | EPI_ISL_3870965 | 2021-09-02      |
| hCoV-19/Japan/PG-78225/2021 | EPI_ISL_3870966 | 2021-09-02      |
| hCoV-19/Japan/PG-78226/2021 | EPI_ISL_3870967 | 2021-09-02      |
| hCoV-19/Japan/PG-78227/2021 | EPI_ISL_3870968 | 2021-09-02      |
| hCoV-19/Japan/PG-78228/2021 | EPI_ISL_3870969 | 2021-09-02      |
| hCoV-19/Japan/PG-78229/2021 | EPI_ISL_3870970 | 2021-09-02      |
| hCoV-19/Japan/PG-78230/2021 | EPI_ISL_3870971 | 2021-09-02      |
| hCoV-19/Japan/PG-78231/2021 | EPI_ISL_3870972 | 2021-09-02      |
| hCoV-19/Japan/PG-78232/2021 | EPI_ISL_3870973 | 2021-09-02      |
| hCoV-19/Japan/PG-78233/2021 | EPI_ISL_3870974 | 2021-09-02      |
| hCoV-19/Japan/PG-78234/2021 | EPI_ISL_3870975 | 2021-09-02      |
| hCoV-19/Japan/PG-78235/2021 | EPI_ISL_3870976 | 2021-09-02      |
| hCoV-19/Japan/PG-78236/2021 | EPI_ISL_3870977 | 2021-09-02      |
| hCoV-19/Japan/PG-78237/2021 | EPI_ISL_3870978 | 2021-09-02      |
| hCoV-19/Japan/PG-78238/2021 | EPI_ISL_3870979 | 2021-09-02      |
| hCoV-19/Japan/PG-78239/2021 | EPI_ISL_3870980 | 2021-09-02      |
| hCoV-19/Japan/PG-78240/2021 | EPI_ISL_3872157 | 2021-09-02      |
| hCoV-19/Japan/PG-78241/2021 | EPI_ISL_3872158 | 2021-09-02      |
| hCoV-19/Japan/PG-78242/2021 | EPI_ISL_3872159 | 2021-09-02      |
| hCoV-19/Japan/PG-78243/2021 | EPI_ISL_3872160 | 2021-09-02      |
| hCoV-19/Japan/PG-78244/2021 | EPI_ISL_3872161 | 2021-09-02      |
| hCoV-19/Japan/PG-78245/2021 | EPI_ISL_3872162 | 2021-09-02      |
| hCoV-19/Japan/PG-78246/2021 | EPI_ISL_3872163 | 2021-09-02      |
| hCoV-19/Japan/PG-78247/2021 | EPI_ISL_3872164 | 2021-09-02      |
| hCoV-19/Japan/PG-78248/2021 | EPI_ISL_3872165 | 2021-09-02      |
| hCoV-19/Japan/PG-78249/2021 | EPI_ISL_3872166 | 2021-09-02      |
| hCoV-19/Japan/PG-78250/2021 | EPI_ISL_3872167 | 2021-09-02      |
| hCoV-19/Japan/PG-78251/2021 | EPI_ISL_3872168 | 2021-09-02      |
| hCoV-19/Japan/PG-78252/2021 | EPI_ISL_3872169 | 2021-09-02      |
| hCoV-19/Japan/PG-78253/2021 | EPI_ISL_3872170 | 2021-09-02      |
| hCoV-19/Japan/PG-78254/2021 | EPI_ISL_3872171 | 2021-09-02      |
| hCoV-19/Japan/PG-78255/2021 | EPI_ISL_3872172 | 2021-09-02      |
| hCoV-19/Japan/PG-78256/2021 | EPI_ISL_3872173 | 2021-09-02      |
| hCoV-19/Japan/PG-78257/2021 | EPI_ISL_3872260 | 2021-09-02      |
| hCoV-19/Japan/PG-78258/2021 | EPI_ISL_3872261 | 2021-09-02      |
| hCoV-19/Japan/PG-78259/2021 | EPI_ISL_3872262 | 2021-09-02      |
| hCoV-19/Japan/PG-78260/2021 | EPI_ISL_3872263 | 2021-09-02      |
| hCoV-19/Japan/PG-78261/2021 | EPI_ISL_3872264 | 2021-09-02      |
| hCoV-19/Japan/PG-78262/2021 | EPI_ISL_3872265 | 2021-09-02      |
| hCoV-19/Japan/PG-78263/2021 | EPI_ISL_3872266 | 2021-09-02      |

| virus_name                  | epiID           | submission_date |
|-----------------------------|-----------------|-----------------|
| hCoV-19/Japan/PG-78264/2021 | EPI_ISL_3872267 | 2021-09-02      |
| hCoV-19/Japan/PG-78265/2021 | EPI_ISL_3872268 | 2021-09-02      |
| hCoV-19/Japan/PG-78266/2021 | EPI_ISL_3872269 | 2021-09-02      |
| hCoV-19/Japan/PG-78267/2021 | EPI_ISL_3872270 | 2021-09-02      |
| hCoV-19/Japan/PG-78268/2021 | EPI_ISL_3872271 | 2021-09-02      |
| hCoV-19/Japan/PG-78269/2021 | EPI_ISL_3872272 | 2021-09-02      |
| hCoV-19/Japan/PG-78270/2021 | EPI_ISL_3872273 | 2021-09-02      |
| hCoV-19/Japan/PG-78271/2021 | EPI_ISL_3872274 | 2021-09-02      |
| hCoV-19/Japan/PG-78272/2021 | EPI_ISL_3872275 | 2021-09-02      |
| hCoV-19/Japan/PG-78273/2021 | EPI_ISL_3872276 | 2021-09-02      |
| hCoV-19/Japan/PG-78274/2021 | EPI_ISL_3872277 | 2021-09-02      |
| hCoV-19/Japan/PG-78275/2021 | EPI_ISL_3872278 | 2021-09-02      |
| hCoV-19/Japan/PG-78276/2021 | EPI_ISL_3872279 | 2021-09-02      |
| hCoV-19/Japan/PG-78277/2021 | EPI_ISL_3872280 | 2021-09-02      |
| hCoV-19/Japan/PG-78278/2021 | EPI_ISL_3872281 | 2021-09-02      |
| hCoV-19/Japan/PG-78279/2021 | EPI_ISL_3872282 | 2021-09-02      |
| hCoV-19/Japan/PG-78280/2021 | EPI_ISL_3872283 | 2021-09-02      |
| hCoV-19/Japan/PG-78281/2021 | EPI_ISL_3888955 | 2021-09-02      |
| hCoV-19/Japan/PG-78282/2021 | EPI_ISL_3888958 | 2021-09-02      |
| hCoV-19/Japan/PG-78283/2021 | EPI_ISL_3888959 | 2021-09-02      |
| hCoV-19/Japan/PG-78284/2021 | EPI_ISL_3888960 | 2021-09-02      |
| hCoV-19/Japan/PG-78285/2021 | EPI_ISL_3888962 | 2021-09-02      |
| hCoV-19/Japan/PG-78286/2021 | EPI_ISL_3888964 | 2021-09-02      |
| hCoV-19/Japan/PG-78287/2021 | EPI_ISL_3888967 | 2021-09-02      |
| hCoV-19/Japan/PG-78288/2021 | EPI_ISL_3888969 | 2021-09-02      |
| hCoV-19/Japan/PG-78289/2021 | EPI_ISL_3888971 | 2021-09-02      |
| hCoV-19/Japan/PG-78290/2021 | EPI_ISL_3888973 | 2021-09-02      |
| hCoV-19/Japan/PG-78291/2021 | EPI_ISL_3888975 | 2021-09-02      |
| hCoV-19/Japan/PG-78292/2021 | EPI_ISL_3888978 | 2021-09-02      |
| hCoV-19/Japan/PG-78293/2021 | EPI_ISL_3888981 | 2021-09-02      |
| hCoV-19/Japan/PG-78294/2021 | EPI_ISL_3888983 | 2021-09-02      |
| hCoV-19/Japan/PG-78295/2021 | EPI_ISL_3888985 | 2021-09-02      |
| hCoV-19/Japan/PG-78296/2021 | EPI_ISL_3888986 | 2021-09-02      |
| hCoV-19/Japan/PG-78297/2021 | EPI_ISL_3888988 | 2021-09-02      |
| hCoV-19/Japan/PG-78298/2021 | EPI_ISL_3888990 | 2021-09-02      |
| hCoV-19/Japan/PG-78299/2021 | EPI_ISL_3888992 | 2021-09-02      |
| hCoV-19/Japan/PG-78300/2021 | EPI_ISL_3888994 | 2021-09-02      |
| hCoV-19/Japan/PG-78301/2021 | EPI_ISL_3888996 | 2021-09-02      |
| hCoV-19/Japan/PG-78302/2021 | EPI_ISL_3888998 | 2021-09-02      |
| hCoV-19/Japan/PG-78303/2021 | EPI_ISL_3889001 | 2021-09-02      |
| hCoV-19/Japan/PG-78304/2021 | EPI_ISL_3889003 | 2021-09-02      |
| hCoV-19/Japan/PG-78305/2021 | EPI_ISL_3889005 | 2021-09-02      |
| hCoV-19/Japan/PG-78306/2021 | EPI_ISL_3889008 | 2021-09-02      |
| hCoV-19/Japan/PG-78307/2021 | EPI_ISL_3889010 | 2021-09-02      |
| hCoV-19/Japan/PG-78308/2021 | EPI_ISL_3889013 | 2021-09-02      |
| hCoV-19/Japan/PG-78309/2021 | EPI_ISL_3889015 | 2021-09-02      |
| hCoV-19/Japan/PG-78310/2021 | EPI_ISL_3889018 | 2021-09-02      |
| hCoV-19/Japan/PG-78311/2021 | EPI_ISL_3889021 | 2021-09-02      |
| hCoV-19/Japan/PG-78312/2021 | EPI_ISL_3889024 | 2021-09-02      |
| hCoV-19/Japan/PG-78313/2021 | EPI_ISL_3889026 | 2021-09-02      |
| hCoV-19/Japan/PG-78314/2021 | EPI_ISL_3889029 | 2021-09-02      |
| hCoV-19/Japan/PG-78315/2021 | EPI_ISL_3889031 | 2021-09-02      |
| hCoV-19/Japan/PG-78316/2021 | EPI_ISL_3889033 | 2021-09-02      |
| hCoV-19/Japan/PG-78317/2021 | EPI_ISL_3889035 | 2021-09-02      |

| virus_name                  | epiID           | submission_date |
|-----------------------------|-----------------|-----------------|
| hCoV-19/Japan/PG-78318/2021 | EPI_ISL_3889038 | 2021-09-02      |
| hCoV-19/Japan/PG-78319/2021 | EPI_ISL_3889040 | 2021-09-02      |
| hCoV-19/Japan/PG-78320/2021 | EPI_ISL_3889043 | 2021-09-02      |
| hCoV-19/Japan/PG-78321/2021 | EPI_ISL_3889046 | 2021-09-02      |
| hCoV-19/Japan/PG-78322/2021 | EPI_ISL_3889048 | 2021-09-02      |
| hCoV-19/Japan/PG-78323/2021 | EPI_ISL_3889051 | 2021-09-02      |
| hCoV-19/Japan/PG-78324/2021 | EPI_ISL_3889052 | 2021-09-02      |
| hCoV-19/Japan/PG-78325/2021 | EPI_ISL_3889054 | 2021-09-02      |
| hCoV-19/Japan/PG-78326/2021 | EPI_ISL_3889056 | 2021-09-02      |
| hCoV-19/Japan/PG-78327/2021 | EPI_ISL_3889057 | 2021-09-02      |
| hCoV-19/Japan/PG-78328/2021 | EPI_ISL_3889061 | 2021-09-02      |
| hCoV-19/Japan/PG-78329/2021 | EPI_ISL_3889064 | 2021-09-02      |
| hCoV-19/Japan/PG-78330/2021 | EPI_ISL_3889066 | 2021-09-02      |
| hCoV-19/Japan/PG-78331/2021 | EPI_ISL_3889068 | 2021-09-02      |
| hCoV-19/Japan/PG-78332/2021 | EPI_ISL_3889070 | 2021-09-02      |
| hCoV-19/Japan/PG-78333/2021 | EPI_ISL_3889073 | 2021-09-02      |
| hCoV-19/Japan/PG-78334/2021 | EPI_ISL_3889075 | 2021-09-02      |
| hCoV-19/Japan/PG-78335/2021 | EPI_ISL_3889078 | 2021-09-02      |
| hCoV-19/Japan/PG-78336/2021 | EPI_ISL_3889080 | 2021-09-02      |
| hCoV-19/Japan/PG-78337/2021 | EPI_ISL_3889083 | 2021-09-02      |
| hCoV-19/Japan/PG-78338/2021 | EPI_ISL_3889085 | 2021-09-02      |
| hCoV-19/Japan/PG-78339/2021 | EPI_ISL_3889088 | 2021-09-02      |
| hCoV-19/Japan/PG-78340/2021 | EPI_ISL_3889090 | 2021-09-02      |
| hCoV-19/Japan/PG-78341/2021 | EPI_ISL_3889092 | 2021-09-02      |
| hCoV-19/Japan/PG-78342/2021 | EPI_ISL_3889095 | 2021-09-02      |
| hCoV-19/Japan/PG-78343/2021 | EPI_ISL_3889097 | 2021-09-02      |
| hCoV-19/Japan/PG-78344/2021 | EPI_ISL_3889099 | 2021-09-02      |
| hCoV-19/Japan/PG-78345/2021 | EPI_ISL_3889101 | 2021-09-02      |
| hCoV-19/Japan/PG-78346/2021 | EPI_ISL_3889102 | 2021-09-02      |
| hCoV-19/Japan/PG-78347/2021 | EPI_ISL_3889104 | 2021-09-02      |
| hCoV-19/Japan/PG-78348/2021 | EPI_ISL_3889107 | 2021-09-02      |
| hCoV-19/Japan/PG-78349/2021 | EPI_ISL_3889109 | 2021-09-02      |
| hCoV-19/Japan/PG-78350/2021 | EPI_ISL_3889112 | 2021-09-02      |
| hCoV-19/Japan/PG-78351/2021 | EPI_ISL_3889114 | 2021-09-02      |
| hCoV-19/Japan/PG-78352/2021 | EPI_ISL_3889116 | 2021-09-02      |
| hCoV-19/Japan/PG-78353/2021 | EPI_ISL_3889118 | 2021-09-02      |
| hCoV-19/Japan/PG-78354/2021 | EPI_ISL_3889121 | 2021-09-02      |
| hCoV-19/Japan/PG-78355/2021 | EPI_ISL_3889123 | 2021-09-02      |
| hCoV-19/Japan/PG-78356/2021 | EPI_ISL_3889125 | 2021-09-02      |
| hCoV-19/Japan/PG-78357/2021 | EPI_ISL_3889128 | 2021-09-02      |
| hCoV-19/Japan/PG-78358/2021 | EPI_ISL_3889131 | 2021-09-02      |
| hCoV-19/Japan/PG-78359/2021 | EPI_ISL_3889133 | 2021-09-02      |
| hCoV-19/Japan/PG-78360/2021 | EPI_ISL_3889135 | 2021-09-02      |
| hCoV-19/Japan/PG-78361/2021 | EPI_ISL_3889137 | 2021-09-02      |
| hCoV-19/Japan/PG-78362/2021 | EPI_ISL_3889141 | 2021-09-02      |
| hCoV-19/Japan/PG-78363/2021 | EPI_ISL_3889143 | 2021-09-02      |
| hCoV-19/Japan/PG-78364/2021 | EPI_ISL_3889145 | 2021-09-02      |
| hCoV-19/Japan/PG-78365/2021 | EPI_ISL_3889147 | 2021-09-02      |
| hCoV-19/Japan/PG-78366/2021 | EPI_ISL_3889149 | 2021-09-02      |
| hCoV-19/Japan/PG-78367/2021 | EPI_ISL_3889152 | 2021-09-02      |
| hCoV-19/Japan/PG-78368/2021 | EPI_ISL_3889154 | 2021-09-02      |
| hCoV-19/Japan/PG-78369/2021 | EPI_ISL_3889156 | 2021-09-02      |
| hCoV-19/Japan/PG-78370/2021 | EPI_ISL_3889157 | 2021-09-02      |
| hCoV-19/Japan/PG-78371/2021 | EPI_ISL_3889159 | 2021-09-02      |

| virus_name                  | epiID           | submission_date |
|-----------------------------|-----------------|-----------------|
| hCoV-19/Japan/PG-78372/2021 | EPI_ISL_3889161 | 2021-09-02      |
| hCoV-19/Japan/PG-78373/2021 | EPI_ISL_3889164 | 2021-09-02      |
| hCoV-19/Japan/PG-78374/2021 | EPI_ISL_3889166 | 2021-09-02      |
| hCoV-19/Japan/PG-78375/2021 | EPI_ISL_3889168 | 2021-09-02      |
| hCoV-19/Japan/PG-78376/2021 | EPI_ISL_3889170 | 2021-09-02      |
| hCoV-19/Japan/PG-78377/2021 | EPI_ISL_3889172 | 2021-09-02      |
| hCoV-19/Japan/PG-78378/2021 | EPI_ISL_3889173 | 2021-09-02      |
| hCoV-19/Japan/PG-78379/2021 | EPI_ISL_3889175 | 2021-09-02      |
| hCoV-19/Japan/PG-78380/2021 | EPI_ISL_3889178 | 2021-09-02      |
| hCoV-19/Japan/PG-78381/2021 | EPI_ISL_3889180 | 2021-09-02      |
| hCoV-19/Japan/PG-78382/2021 | EPI_ISL_3889181 | 2021-09-02      |
| hCoV-19/Japan/PG-78383/2021 | EPI_ISL_3889183 | 2021-09-02      |
| hCoV-19/Japan/PG-78384/2021 | EPI_ISL_3889185 | 2021-09-02      |
| hCoV-19/Japan/PG-78385/2021 | EPI_ISL_3889188 | 2021-09-02      |
| hCoV-19/Japan/PG-78386/2021 | EPI_ISL_3889189 | 2021-09-02      |
| hCoV-19/Japan/PG-78387/2021 | EPI_ISL_3889191 | 2021-09-02      |
| hCoV-19/Japan/PG-78388/2021 | EPI_ISL_3889193 | 2021-09-02      |
| hCoV-19/Japan/PG-78389/2021 | EPI_ISL_3889194 | 2021-09-02      |
| hCoV-19/Japan/PG-78390/2021 | EPI_ISL_3889199 | 2021-09-02      |
| hCoV-19/Japan/PG-78391/2021 | EPI_ISL_3889201 | 2021-09-02      |
| hCoV-19/Japan/PG-78392/2021 | EPI_ISL_3889203 | 2021-09-02      |
| hCoV-19/Japan/PG-78393/2021 | EPI_ISL_3889206 | 2021-09-02      |
| hCoV-19/Japan/PG-78394/2021 | EPI_ISL_3889208 | 2021-09-02      |
| hCoV-19/Japan/PG-78395/2021 | EPI_ISL_3889210 | 2021-09-02      |
| hCoV-19/Japan/PG-78396/2021 | EPI_ISL_3889212 | 2021-09-02      |
| hCoV-19/Japan/PG-78397/2021 | EPI_ISL_3889215 | 2021-09-02      |
| hCoV-19/Japan/PG-78398/2021 | EPI_ISL_3889217 | 2021-09-02      |
| hCoV-19/Japan/PG-78399/2021 | EPI_ISL_3889220 | 2021-09-02      |
| hCoV-19/Japan/PG-78400/2021 | EPI_ISL_3889223 | 2021-09-02      |
| hCoV-19/Japan/PG-78401/2021 | EPI_ISL_3889225 | 2021-09-02      |
| hCoV-19/Japan/PG-78402/2021 | EPI_ISL_3889228 | 2021-09-02      |
| hCoV-19/Japan/PG-78403/2021 | EPI_ISL_3889229 | 2021-09-02      |
| hCoV-19/Japan/PG-78404/2021 | EPI_ISL_3889232 | 2021-09-02      |
| hCoV-19/Japan/PG-78405/2021 | EPI_ISL_3889234 | 2021-09-02      |
| hCoV-19/Japan/PG-78406/2021 | EPI_ISL_3889237 | 2021-09-02      |
| hCoV-19/Japan/PG-78407/2021 | EPI_ISL_3889240 | 2021-09-02      |
| hCoV-19/Japan/PG-78408/2021 | EPI_ISL_3889242 | 2021-09-02      |
| hCoV-19/Japan/PG-78409/2021 | EPI_ISL_3889245 | 2021-09-02      |
| hCoV-19/Japan/PG-78410/2021 | EPI_ISL_3889247 | 2021-09-02      |
| hCoV-19/Japan/PG-78411/2021 | EPI_ISL_3889250 | 2021-09-02      |
| hCoV-19/Japan/PG-78412/2021 | EPI_ISL_3889253 | 2021-09-02      |
| hCoV-19/Japan/PG-78413/2021 | EPI_ISL_3889255 | 2021-09-02      |
| hCoV-19/Japan/PG-78414/2021 | EPI_ISL_3889258 | 2021-09-02      |
| hCoV-19/Japan/PG-78415/2021 | EPI_ISL_3889260 | 2021-09-02      |
| hCoV-19/Japan/PG-78416/2021 | EPI_ISL_3889262 | 2021-09-02      |
| hCoV-19/Japan/PG-78417/2021 | EPI_ISL_3889265 | 2021-09-02      |
| hCoV-19/Japan/PG-78418/2021 | EPI_ISL_3889268 | 2021-09-02      |
| hCoV-19/Japan/PG-78419/2021 | EPI_ISL_3889271 | 2021-09-02      |
| hCoV-19/Japan/PG-78420/2021 | EPI_ISL_3889273 | 2021-09-02      |
| hCoV-19/Japan/PG-78421/2021 | EPI_ISL_3889276 | 2021-09-02      |
| hCoV-19/Japan/PG-78422/2021 | EPI_ISL_3889279 | 2021-09-02      |
| hCoV-19/Japan/PG-78423/2021 | EPI_ISL_3889282 | 2021-09-02      |
| hCoV-19/Japan/PG-78424/2021 | EPI_ISL_3889285 | 2021-09-02      |
| hCoV-19/Japan/PG-78425/2021 | EPI_ISL_3889287 | 2021-09-02      |

| virus_name                  | epiID           | submission_date |
|-----------------------------|-----------------|-----------------|
| hCoV-19/Japan/PG-78426/2021 | EPI_ISL_3889290 | 2021-09-02      |
| hCoV-19/Japan/PG-78427/2021 | EPI_ISL_3889292 | 2021-09-02      |
| hCoV-19/Japan/PG-78428/2021 | EPI_ISL_3889295 | 2021-09-02      |
| hCoV-19/Japan/PG-78429/2021 | EPI_ISL_3889297 | 2021-09-02      |
| hCoV-19/Japan/PG-78430/2021 | EPI_ISL_3889300 | 2021-09-02      |
| hCoV-19/Japan/PG-78431/2021 | EPI_ISL_3889303 | 2021-09-02      |
| hCoV-19/Japan/PG-78432/2021 | EPI_ISL_3889305 | 2021-09-02      |
| hCoV-19/Japan/PG-78433/2021 | EPI_ISL_3889308 | 2021-09-02      |
| hCoV-19/Japan/PG-78434/2021 | EPI_ISL_3889309 | 2021-09-02      |
| hCoV-19/Japan/PG-78435/2021 | EPI_ISL_3889312 | 2021-09-02      |
| hCoV-19/Japan/PG-78436/2021 | EPI_ISL_3889314 | 2021-09-02      |
| hCoV-19/Japan/PG-78437/2021 | EPI_ISL_3889316 | 2021-09-02      |
| hCoV-19/Japan/PG-78438/2021 | EPI_ISL_3889317 | 2021-09-02      |
| hCoV-19/Japan/PG-78439/2021 | EPI_ISL_3889319 | 2021-09-02      |
| hCoV-19/Japan/PG-78440/2021 | EPI_ISL_3889322 | 2021-09-02      |
| hCoV-19/Japan/PG-78441/2021 | EPI_ISL_3889325 | 2021-09-02      |
| hCoV-19/Japan/PG-78442/2021 | EPI_ISL_3889328 | 2021-09-02      |
| hCoV-19/Japan/PG-78443/2021 | EPI_ISL_3889330 | 2021-09-02      |
| hCoV-19/Japan/PG-78444/2021 | EPI_ISL_3889333 | 2021-09-02      |
| hCoV-19/Japan/PG-78445/2021 | EPI_ISL_3889335 | 2021-09-02      |
| hCoV-19/Japan/PG-78446/2021 | EPI_ISL_3889337 | 2021-09-02      |
| hCoV-19/Japan/PG-78447/2021 | EPI_ISL_3889340 | 2021-09-02      |
| hCoV-19/Japan/PG-78448/2021 | EPI_ISL_3889343 | 2021-09-02      |
| hCoV-19/Japan/PG-78449/2021 | EPI_ISL_3889345 | 2021-09-02      |
| hCoV-19/Japan/PG-78450/2021 | EPI_ISL_3889348 | 2021-09-02      |
| hCoV-19/Japan/PG-78451/2021 | EPI_ISL_3889351 | 2021-09-02      |
| hCoV-19/Japan/PG-78452/2021 | EPI_ISL_3889353 | 2021-09-02      |
| hCoV-19/Japan/PG-78453/2021 | EPI_ISL_3889356 | 2021-09-02      |
| hCoV-19/Japan/PG-78454/2021 | EPI_ISL_3889358 | 2021-09-02      |
| hCoV-19/Japan/PG-78455/2021 | EPI_ISL_3889360 | 2021-09-02      |
| hCoV-19/Japan/PG-78456/2021 | EPI_ISL_3889363 | 2021-09-02      |
| hCoV-19/Japan/PG-78457/2021 | EPI_ISL_3889365 | 2021-09-02      |
| hCoV-19/Japan/PG-78458/2021 | EPI_ISL_3889368 | 2021-09-02      |
| hCoV-19/Japan/PG-78459/2021 | EPI_ISL_3889370 | 2021-09-02      |
| hCoV-19/Japan/PG-78460/2021 | EPI_ISL_3889373 | 2021-09-02      |
| hCoV-19/Japan/PG-78461/2021 | EPI_ISL_3889376 | 2021-09-02      |
| hCoV-19/Japan/PG-78462/2021 | EPI_ISL_3889379 | 2021-09-02      |
| hCoV-19/Japan/PG-78463/2021 | EPI_ISL_3889381 | 2021-09-02      |
| hCoV-19/Japan/PG-78464/2021 | EPI_ISL_3889384 | 2021-09-02      |
| hCoV-19/Japan/PG-78465/2021 | EPI_ISL_3889386 | 2021-09-02      |
| hCoV-19/Japan/PG-78466/2021 | EPI_ISL_3889388 | 2021-09-02      |
| hCoV-19/Japan/PG-78467/2021 | EPI_ISL_3889391 | 2021-09-02      |
| hCoV-19/Japan/PG-78468/2021 | EPI_ISL_3889394 | 2021-09-02      |
| hCoV-19/Japan/PG-78469/2021 | EPI_ISL_3889396 | 2021-09-02      |
| hCoV-19/Japan/PG-78470/2021 | EPI_ISL_3889398 | 2021-09-02      |
| hCoV-19/Japan/PG-78471/2021 | EPI_ISL_3889401 | 2021-09-02      |
| hCoV-19/Japan/PG-78472/2021 | EPI_ISL_3889404 | 2021-09-02      |
| hCoV-19/Japan/PG-78473/2021 | EPI_ISL_3889407 | 2021-09-02      |
| hCoV-19/Japan/PG-78474/2021 | EPI_ISL_3889410 | 2021-09-02      |
| hCoV-19/Japan/PG-78475/2021 | EPI_ISL_3889412 | 2021-09-02      |
| hCoV-19/Japan/PG-78476/2021 | EPI_ISL_3889415 | 2021-09-02      |
| hCoV-19/Japan/PG-78477/2021 | EPI_ISL_3889417 | 2021-09-02      |
| hCoV-19/Japan/PG-78478/2021 | EPI_ISL_3889420 | 2021-09-02      |
| hCoV-19/Japan/PG-78479/2021 | EPI_ISL_3889423 | 2021-09-02      |



| virus_name                  | epiID           | submission_date |
|-----------------------------|-----------------|-----------------|
| hCoV-19/Japan/PG-78480/2021 | EPI_ISL_3889426 | 2021-09-02      |
| hCoV-19/Japan/PG-78481/2021 | EPI_ISL_3889428 | 2021-09-02      |
| hCoV-19/Japan/PG-78482/2021 | EPI_ISL_3889431 | 2021-09-02      |
| hCoV-19/Japan/PG-78483/2021 | EPI_ISL_3889434 | 2021-09-02      |
| hCoV-19/Japan/PG-78484/2021 | EPI_ISL_3889437 | 2021-09-02      |
| hCoV-19/Japan/PG-78485/2021 | EPI_ISL_3889439 | 2021-09-02      |
| hCoV-19/Japan/PG-78514/2021 | EPI_ISL_3889442 | 2021-09-02      |
| hCoV-19/Japan/PG-78515/2021 | EPI_ISL_3889444 | 2021-09-02      |
| hCoV-19/Japan/PG-78516/2021 | EPI_ISL_3889447 | 2021-09-02      |
| hCoV-19/Japan/PG-78517/2021 | EPI_ISL_3889450 | 2021-09-02      |
| hCoV-19/Japan/PG-78518/2021 | EPI_ISL_3889452 | 2021-09-02      |
| hCoV-19/Japan/PG-78519/2021 | EPI_ISL_3889455 | 2021-09-02      |
| hCoV-19/Japan/PG-78520/2021 | EPI_ISL_3889457 | 2021-09-02      |
| hCoV-19/Japan/PG-78521/2021 | EPI_ISL_3889460 | 2021-09-02      |
| hCoV-19/Japan/PG-78522/2021 | EPI_ISL_3889463 | 2021-09-02      |
| hCoV-19/Japan/PG-78523/2021 | EPI_ISL_3889466 | 2021-09-02      |
| hCoV-19/Japan/PG-78524/2021 | EPI_ISL_3889469 | 2021-09-02      |
| hCoV-19/Japan/PG-78525/2021 | EPI_ISL_3889472 | 2021-09-02      |
| hCoV-19/Japan/PG-78526/2021 | EPI_ISL_3889475 | 2021-09-02      |
| hCoV-19/Japan/PG-78527/2021 | EPI_ISL_3889477 | 2021-09-02      |
| hCoV-19/Japan/PG-78528/2021 | EPI_ISL_3889480 | 2021-09-02      |
| hCoV-19/Japan/PG-78529/2021 | EPI_ISL_3889483 | 2021-09-02      |
| hCoV-19/Japan/PG-78530/2021 | EPI_ISL_3889485 | 2021-09-02      |
| hCoV-19/Japan/PG-78531/2021 | EPI_ISL_3889487 | 2021-09-02      |
| hCoV-19/Japan/PG-78532/2021 | EPI_ISL_3889489 | 2021-09-02      |
| hCoV-19/Japan/PG-78533/2021 | EPI_ISL_3889492 | 2021-09-02      |
| hCoV-19/Japan/PG-78534/2021 | EPI_ISL_3889494 | 2021-09-02      |
| hCoV-19/Japan/PG-78535/2021 | EPI_ISL_3889495 | 2021-09-02      |
| hCoV-19/Japan/PG-78536/2021 | EPI_ISL_3889498 | 2021-09-02      |
| hCoV-19/Japan/PG-78537/2021 | EPI_ISL_3889499 | 2021-09-02      |
| hCoV-19/Japan/PG-78538/2021 | EPI_ISL_3889500 | 2021-09-02      |
| hCoV-19/Japan/PG-78539/2021 | EPI_ISL_3889501 | 2021-09-02      |
| hCoV-19/Japan/PG-78540/2021 | EPI_ISL_3889502 | 2021-09-02      |
| hCoV-19/Japan/PG-78541/2021 | EPI_ISL_3889503 | 2021-09-02      |
| hCoV-19/Japan/PG-78542/2021 | EPI_ISL_3889505 | 2021-09-02      |
| hCoV-19/Japan/PG-78543/2021 | EPI_ISL_3889508 | 2021-09-02      |
| hCoV-19/Japan/PG-78544/2021 | EPI_ISL_3889511 | 2021-09-02      |
| hCoV-19/Japan/PG-78545/2021 | EPI_ISL_3889513 | 2021-09-02      |
| hCoV-19/Japan/PG-78546/2021 | EPI_ISL_3889516 | 2021-09-02      |
| hCoV-19/Japan/PG-78547/2021 | EPI_ISL_3889518 | 2021-09-02      |
| hCoV-19/Japan/PG-78548/2021 | EPI_ISL_3889521 | 2021-09-02      |
| hCoV-19/Japan/PG-78549/2021 | EPI_ISL_3889523 | 2021-09-02      |
| hCoV-19/Japan/PG-78550/2021 | EPI_ISL_3889525 | 2021-09-02      |
| hCoV-19/Japan/PG-78551/2021 | EPI_ISL_3889527 | 2021-09-02      |
| hCoV-19/Japan/PG-78552/2021 | EPI_ISL_3889529 | 2021-09-02      |
| hCoV-19/Japan/PG-78553/2021 | EPI_ISL_3889532 | 2021-09-02      |
| hCoV-19/Japan/PG-78554/2021 | EPI_ISL_3889535 | 2021-09-02      |
| hCoV-19/Japan/PG-78555/2021 | EPI_ISL_3889538 | 2021-09-02      |
| hCoV-19/Japan/PG-78556/2021 | EPI_ISL_3889540 | 2021-09-02      |
| hCoV-19/Japan/PG-78557/2021 | EPI_ISL_3889543 | 2021-09-02      |
| hCoV-19/Japan/PG-78558/2021 | EPI_ISL_3889547 | 2021-09-02      |
| hCoV-19/Japan/PG-78559/2021 | EPI_ISL_3889549 | 2021-09-02      |
| hCoV-19/Japan/PG-78560/2021 | EPI_ISL_3889553 | 2021-09-02      |
| hCoV-19/Japan/PG-78561/2021 | EPI_ISL_3889554 | 2021-09-02      |

| virus_name                  | epiID           | submission_date |
|-----------------------------|-----------------|-----------------|
| hCoV-19/Japan/PG-78562/2021 | EPI_ISL_3889556 | 2021-09-02      |
| hCoV-19/Japan/PG-78563/2021 | EPI_ISL_3889558 | 2021-09-02      |
| hCoV-19/Japan/PG-78564/2021 | EPI_ISL_3889561 | 2021-09-02      |
| hCoV-19/Japan/PG-78565/2021 | EPI_ISL_3889564 | 2021-09-02      |
| hCoV-19/Japan/PG-78566/2021 | EPI_ISL_3889566 | 2021-09-02      |
| hCoV-19/Japan/PG-78567/2021 | EPI_ISL_3889569 | 2021-09-02      |
| hCoV-19/Japan/PG-78568/2021 | EPI_ISL_3889572 | 2021-09-02      |
| hCoV-19/Japan/PG-78569/2021 | EPI_ISL_3889575 | 2021-09-02      |
| hCoV-19/Japan/PG-78570/2021 | EPI_ISL_3889577 | 2021-09-02      |
| hCoV-19/Japan/PG-78571/2021 | EPI_ISL_3889580 | 2021-09-02      |
| hCoV-19/Japan/PG-78572/2021 | EPI_ISL_3889582 | 2021-09-02      |
| hCoV-19/Japan/PG-78573/2021 | EPI_ISL_3889584 | 2021-09-02      |
| hCoV-19/Japan/PG-78574/2021 | EPI_ISL_3889587 | 2021-09-02      |
| hCoV-19/Japan/PG-78575/2021 | EPI_ISL_3889590 | 2021-09-02      |
| hCoV-19/Japan/PG-78576/2021 | EPI_ISL_3889593 | 2021-09-02      |
| hCoV-19/Japan/PG-78577/2021 | EPI_ISL_3889595 | 2021-09-02      |
| hCoV-19/Japan/PG-78578/2021 | EPI_ISL_3889597 | 2021-09-02      |
| hCoV-19/Japan/PG-78579/2021 | EPI_ISL_3889600 | 2021-09-02      |
| hCoV-19/Japan/PG-78580/2021 | EPI_ISL_3889603 | 2021-09-02      |
| hCoV-19/Japan/PG-78581/2021 | EPI_ISL_3889605 | 2021-09-02      |
| hCoV-19/Japan/PG-78582/2021 | EPI_ISL_3889607 | 2021-09-02      |
| hCoV-19/Japan/PG-78583/2021 | EPI_ISL_3889610 | 2021-09-02      |
| hCoV-19/Japan/PG-78584/2021 | EPI_ISL_3889613 | 2021-09-02      |
| hCoV-19/Japan/PG-78585/2021 | EPI_ISL_3889615 | 2021-09-02      |
| hCoV-19/Japan/PG-78586/2021 | EPI_ISL_3889617 | 2021-09-02      |
| hCoV-19/Japan/PG-78587/2021 | EPI_ISL_3889619 | 2021-09-02      |
| hCoV-19/Japan/PG-78588/2021 | EPI_ISL_3889621 | 2021-09-02      |
| hCoV-19/Japan/PG-78589/2021 | EPI_ISL_3889624 | 2021-09-02      |
| hCoV-19/Japan/PG-78590/2021 | EPI_ISL_3889626 | 2021-09-02      |
| hCoV-19/Japan/PG-78591/2021 | EPI_ISL_3889628 | 2021-09-02      |
| hCoV-19/Japan/PG-78592/2021 | EPI_ISL_3889630 | 2021-09-02      |
| hCoV-19/Japan/PG-78593/2021 | EPI_ISL_3889632 | 2021-09-02      |
| hCoV-19/Japan/PG-78594/2021 | EPI_ISL_3889635 | 2021-09-02      |
| hCoV-19/Japan/PG-78595/2021 | EPI_ISL_3889637 | 2021-09-02      |
| hCoV-19/Japan/PG-78596/2021 | EPI_ISL_3889639 | 2021-09-02      |
| hCoV-19/Japan/PG-78597/2021 | EPI_ISL_3889642 | 2021-09-02      |
| hCoV-19/Japan/PG-78598/2021 | EPI_ISL_3889645 | 2021-09-02      |
| hCoV-19/Japan/PG-78599/2021 | EPI_ISL_3889646 | 2021-09-02      |
| hCoV-19/Japan/PG-78600/2021 | EPI_ISL_3889647 | 2021-09-02      |
| hCoV-19/Japan/PG-78601/2021 | EPI_ISL_3889648 | 2021-09-02      |
| hCoV-19/Japan/PG-78602/2021 | EPI_ISL_3889649 | 2021-09-02      |
| hCoV-19/Japan/PG-78603/2021 | EPI_ISL_3889650 | 2021-09-02      |
| hCoV-19/Japan/PG-78604/2021 | EPI_ISL_3889651 | 2021-09-02      |
| hCoV-19/Japan/PG-78605/2021 | EPI_ISL_3889655 | 2021-09-02      |
| hCoV-19/Japan/PG-78606/2021 | EPI_ISL_3889657 | 2021-09-02      |
| hCoV-19/Japan/PG-78607/2021 | EPI_ISL_3889659 | 2021-09-02      |
| hCoV-19/Japan/PG-78608/2021 | EPI_ISL_3889661 | 2021-09-02      |
| hCoV-19/Japan/PG-78609/2021 | EPI_ISL_3889665 | 2021-09-02      |
| hCoV-19/Japan/PG-78610/2021 | EPI_ISL_3889667 | 2021-09-02      |
| hCoV-19/Japan/PG-78611/2021 | EPI_ISL_3889670 | 2021-09-02      |
| hCoV-19/Japan/PG-78612/2021 | EPI_ISL_3889672 | 2021-09-02      |
| hCoV-19/Japan/PG-78613/2021 | EPI_ISL_3889676 | 2021-09-02      |
| hCoV-19/Japan/PG-78614/2021 | EPI_ISL_3889678 | 2021-09-02      |
| hCoV-19/Japan/PG-78615/2021 | EPI_ISL_3889681 | 2021-09-02      |

| virus_name                  | epiID           | submission_date |
|-----------------------------|-----------------|-----------------|
| hCoV-19/Japan/PG-78616/2021 | EPI_ISL_3889684 | 2021-09-02      |
| hCoV-19/Japan/PG-78617/2021 | EPI_ISL_3889687 | 2021-09-02      |
| hCoV-19/Japan/PG-78618/2021 | EPI_ISL_3889690 | 2021-09-02      |
| hCoV-19/Japan/PG-78619/2021 | EPI_ISL_3889693 | 2021-09-02      |
| hCoV-19/Japan/PG-78620/2021 | EPI_ISL_3889696 | 2021-09-02      |
| hCoV-19/Japan/PG-78621/2021 | EPI_ISL_3889698 | 2021-09-02      |
| hCoV-19/Japan/PG-78622/2021 | EPI_ISL_3889702 | 2021-09-02      |
| hCoV-19/Japan/PG-78623/2021 | EPI_ISL_3889703 | 2021-09-02      |
| hCoV-19/Japan/PG-78624/2021 | EPI_ISL_3889705 | 2021-09-02      |
| hCoV-19/Japan/PG-78625/2021 | EPI_ISL_3889708 | 2021-09-02      |
| hCoV-19/Japan/PG-78626/2021 | EPI_ISL_3889710 | 2021-09-02      |
| hCoV-19/Japan/PG-78627/2021 | EPI_ISL_3889713 | 2021-09-02      |
| hCoV-19/Japan/PG-78628/2021 | EPI_ISL_3889717 | 2021-09-02      |
| hCoV-19/Japan/PG-78629/2021 | EPI_ISL_3889719 | 2021-09-02      |
| hCoV-19/Japan/PG-78630/2021 | EPI_ISL_3889722 | 2021-09-02      |
| hCoV-19/Japan/PG-78631/2021 | EPI_ISL_3889725 | 2021-09-02      |
| hCoV-19/Japan/PG-78632/2021 | EPI_ISL_3889728 | 2021-09-02      |
| hCoV-19/Japan/PG-78633/2021 | EPI_ISL_3889731 | 2021-09-02      |
| hCoV-19/Japan/PG-78634/2021 | EPI_ISL_3889734 | 2021-09-02      |
| hCoV-19/Japan/PG-78635/2021 | EPI_ISL_3889736 | 2021-09-02      |
| hCoV-19/Japan/PG-78636/2021 | EPI_ISL_3889739 | 2021-09-02      |
| hCoV-19/Japan/PG-78637/2021 | EPI_ISL_3889742 | 2021-09-02      |
| hCoV-19/Japan/PG-78638/2021 | EPI_ISL_3889744 | 2021-09-02      |
| hCoV-19/Japan/PG-78639/2021 | EPI_ISL_3889747 | 2021-09-02      |
| hCoV-19/Japan/PG-78640/2021 | EPI_ISL_3889750 | 2021-09-02      |
| hCoV-19/Japan/PG-78641/2021 | EPI_ISL_3889753 | 2021-09-02      |
| hCoV-19/Japan/PG-78642/2021 | EPI_ISL_3889756 | 2021-09-02      |
| hCoV-19/Japan/PG-78643/2021 | EPI_ISL_3889758 | 2021-09-02      |
| hCoV-19/Japan/PG-78644/2021 | EPI_ISL_3889762 | 2021-09-02      |
| hCoV-19/Japan/PG-78645/2021 | EPI_ISL_3889764 | 2021-09-02      |
| hCoV-19/Japan/PG-78646/2021 | EPI_ISL_3889767 | 2021-09-02      |
| hCoV-19/Japan/PG-78647/2021 | EPI_ISL_3889770 | 2021-09-02      |
| hCoV-19/Japan/PG-78648/2021 | EPI_ISL_3889773 | 2021-09-02      |
| hCoV-19/Japan/PG-78649/2021 | EPI_ISL_3889775 | 2021-09-02      |
| hCoV-19/Japan/PG-78650/2021 | EPI_ISL_3889778 | 2021-09-02      |
| hCoV-19/Japan/PG-78651/2021 | EPI_ISL_3889781 | 2021-09-02      |
| hCoV-19/Japan/PG-78652/2021 | EPI_ISL_3889783 | 2021-09-02      |
| hCoV-19/Japan/PG-78653/2021 | EPI_ISL_3889785 | 2021-09-02      |
| hCoV-19/Japan/PG-78654/2021 | EPI_ISL_3889788 | 2021-09-02      |
| hCoV-19/Japan/PG-78655/2021 | EPI_ISL_3889790 | 2021-09-02      |
| hCoV-19/Japan/PG-78656/2021 | EPI_ISL_3889792 | 2021-09-02      |
| hCoV-19/Japan/PG-78657/2021 | EPI_ISL_3889794 | 2021-09-02      |
| hCoV-19/Japan/PG-78658/2021 | EPI_ISL_3889796 | 2021-09-02      |
| hCoV-19/Japan/PG-78659/2021 | EPI_ISL_3889798 | 2021-09-02      |
| hCoV-19/Japan/PG-78660/2021 | EPI_ISL_3889801 | 2021-09-02      |
| hCoV-19/Japan/PG-78661/2021 | EPI_ISL_3889803 | 2021-09-02      |
| hCoV-19/Japan/PG-78662/2021 | EPI_ISL_3889806 | 2021-09-02      |
| hCoV-19/Japan/PG-78663/2021 | EPI_ISL_3889808 | 2021-09-02      |
| hCoV-19/Japan/PG-78664/2021 | EPI_ISL_3889811 | 2021-09-02      |
| hCoV-19/Japan/PG-78665/2021 | EPI_ISL_3889813 | 2021-09-02      |
| hCoV-19/Japan/PG-78666/2021 | EPI_ISL_3889815 | 2021-09-02      |
| hCoV-19/Japan/PG-78667/2021 | EPI_ISL_3889817 | 2021-09-02      |
| hCoV-19/Japan/PG-78668/2021 | EPI_ISL_3889819 | 2021-09-02      |
| hCoV-19/Japan/PG-78669/2021 | EPI_ISL_3889822 | 2021-09-02      |

| virus_name                  | epiID           | submission_date |
|-----------------------------|-----------------|-----------------|
| hCoV-19/Japan/PG-78670/2021 | EPI_ISL_3889824 | 2021-09-02      |
| hCoV-19/Japan/PG-78671/2021 | EPI_ISL_3889827 | 2021-09-02      |
| hCoV-19/Japan/PG-78672/2021 | EPI_ISL_3889829 | 2021-09-02      |
| hCoV-19/Japan/PG-78673/2021 | EPI_ISL_3889832 | 2021-09-02      |
| hCoV-19/Japan/PG-78674/2021 | EPI_ISL_3889833 | 2021-09-02      |
| hCoV-19/Japan/PG-78675/2021 | EPI_ISL_3889837 | 2021-09-02      |
| hCoV-19/Japan/PG-78676/2021 | EPI_ISL_3889839 | 2021-09-02      |
| hCoV-19/Japan/PG-78677/2021 | EPI_ISL_3889842 | 2021-09-02      |
| hCoV-19/Japan/PG-78678/2021 | EPI_ISL_3889845 | 2021-09-02      |
| hCoV-19/Japan/PG-78679/2021 | EPI_ISL_3889848 | 2021-09-02      |
| hCoV-19/Japan/PG-78680/2021 | EPI_ISL_3889850 | 2021-09-02      |
| hCoV-19/Japan/PG-78681/2021 | EPI_ISL_3889852 | 2021-09-02      |
| hCoV-19/Japan/PG-78682/2021 | EPI_ISL_3889855 | 2021-09-02      |
| hCoV-19/Japan/PG-78683/2021 | EPI_ISL_3889858 | 2021-09-02      |
| hCoV-19/Japan/PG-78684/2021 | EPI_ISL_3889860 | 2021-09-02      |
| hCoV-19/Japan/PG-78685/2021 | EPI_ISL_3889861 | 2021-09-02      |
| hCoV-19/Japan/PG-78686/2021 | EPI_ISL_3889862 | 2021-09-02      |
| hCoV-19/Japan/PG-78687/2021 | EPI_ISL_3889863 | 2021-09-02      |
| hCoV-19/Japan/PG-78688/2021 | EPI_ISL_3889864 | 2021-09-02      |
| hCoV-19/Japan/PG-78689/2021 | EPI_ISL_3889865 | 2021-09-02      |
| hCoV-19/Japan/PG-78690/2021 | EPI_ISL_3889866 | 2021-09-02      |
| hCoV-19/Japan/PG-78691/2021 | EPI_ISL_3889869 | 2021-09-02      |
| hCoV-19/Japan/PG-78692/2021 | EPI_ISL_3889872 | 2021-09-02      |
| hCoV-19/Japan/PG-78693/2021 | EPI_ISL_3889874 | 2021-09-02      |
| hCoV-19/Japan/PG-78694/2021 | EPI_ISL_3889876 | 2021-09-02      |
| hCoV-19/Japan/PG-78695/2021 | EPI_ISL_3889879 | 2021-09-02      |
| hCoV-19/Japan/PG-78696/2021 | EPI_ISL_3889881 | 2021-09-02      |
| hCoV-19/Japan/PG-78697/2021 | EPI_ISL_3889884 | 2021-09-02      |
| hCoV-19/Japan/PG-78698/2021 | EPI_ISL_3889886 | 2021-09-02      |
| hCoV-19/Japan/PG-78699/2021 | EPI_ISL_3889889 | 2021-09-02      |
| hCoV-19/Japan/PG-78700/2021 | EPI_ISL_3889891 | 2021-09-02      |
| hCoV-19/Japan/PG-78701/2021 | EPI_ISL_3889893 | 2021-09-02      |
| hCoV-19/Japan/PG-78702/2021 | EPI_ISL_3889895 | 2021-09-02      |
| hCoV-19/Japan/PG-78703/2021 | EPI_ISL_3889897 | 2021-09-02      |
| hCoV-19/Japan/PG-78704/2021 | EPI_ISL_3889900 | 2021-09-02      |
| hCoV-19/Japan/PG-78705/2021 | EPI_ISL_3889903 | 2021-09-02      |
| hCoV-19/Japan/PG-78706/2021 | EPI_ISL_3889905 | 2021-09-02      |
| hCoV-19/Japan/PG-78707/2021 | EPI_ISL_3889908 | 2021-09-02      |
| hCoV-19/Japan/PG-78708/2021 | EPI_ISL_3889910 | 2021-09-02      |
| hCoV-19/Japan/PG-78709/2021 | EPI_ISL_3889914 | 2021-09-02      |
| hCoV-19/Japan/PG-78710/2021 | EPI_ISL_3889916 | 2021-09-02      |
| hCoV-19/Japan/PG-78711/2021 | EPI_ISL_3889919 | 2021-09-02      |
| hCoV-19/Japan/PG-78712/2021 | EPI_ISL_3889922 | 2021-09-02      |
| hCoV-19/Japan/PG-78713/2021 | EPI_ISL_3889925 | 2021-09-02      |
| hCoV-19/Japan/PG-78714/2021 | EPI_ISL_3889928 | 2021-09-02      |
| hCoV-19/Japan/PG-78715/2021 | EPI_ISL_3889930 | 2021-09-02      |
| hCoV-19/Japan/PG-78716/2021 | EPI_ISL_3889933 | 2021-09-02      |
| hCoV-19/Japan/PG-78717/2021 | EPI_ISL_3889936 | 2021-09-02      |
| hCoV-19/Japan/PG-78718/2021 | EPI_ISL_3889939 | 2021-09-02      |
| hCoV-19/Japan/PG-78719/2021 | EPI_ISL_3889940 | 2021-09-02      |
| hCoV-19/Japan/PG-78720/2021 | EPI_ISL_3889943 | 2021-09-02      |
| hCoV-19/Japan/PG-78721/2021 | EPI_ISL_3889945 | 2021-09-02      |
| hCoV-19/Japan/PG-78722/2021 | EPI_ISL_3889948 | 2021-09-02      |
| hCoV-19/Japan/PG-78723/2021 | EPI_ISL_3889950 | 2021-09-02      |

| virus_name                  | epiID           | submission_date |
|-----------------------------|-----------------|-----------------|
| hCoV-19/Japan/PG-78724/2021 | EPI_ISL_3889953 | 2021-09-02      |
| hCoV-19/Japan/PG-78725/2021 | EPI_ISL_3889956 | 2021-09-02      |
| hCoV-19/Japan/PG-78726/2021 | EPI_ISL_3889958 | 2021-09-02      |
| hCoV-19/Japan/PG-78727/2021 | EPI_ISL_3889961 | 2021-09-02      |
| hCoV-19/Japan/PG-78728/2021 | EPI_ISL_3889964 | 2021-09-02      |
| hCoV-19/Japan/PG-78729/2021 | EPI_ISL_3889966 | 2021-09-02      |
| hCoV-19/Japan/PG-78730/2021 | EPI_ISL_3889969 | 2021-09-02      |
| hCoV-19/Japan/PG-78731/2021 | EPI_ISL_3889972 | 2021-09-02      |
| hCoV-19/Japan/PG-78732/2021 | EPI_ISL_3889974 | 2021-09-02      |
| hCoV-19/Japan/PG-78733/2021 | EPI_ISL_3889977 | 2021-09-02      |
| hCoV-19/Japan/PG-78734/2021 | EPI_ISL_3889979 | 2021-09-02      |
| hCoV-19/Japan/PG-78735/2021 | EPI_ISL_3889983 | 2021-09-02      |
| hCoV-19/Japan/PG-78736/2021 | EPI_ISL_3889986 | 2021-09-02      |
| hCoV-19/Japan/PG-78737/2021 | EPI_ISL_3889989 | 2021-09-02      |
| hCoV-19/Japan/PG-78738/2021 | EPI_ISL_3889991 | 2021-09-02      |
| hCoV-19/Japan/PG-78739/2021 | EPI_ISL_3889993 | 2021-09-02      |
| hCoV-19/Japan/PG-78740/2021 | EPI_ISL_3889995 | 2021-09-02      |
| hCoV-19/Japan/PG-78741/2021 | EPI_ISL_3889998 | 2021-09-02      |
| hCoV-19/Japan/PG-78742/2021 | EPI_ISL_3890000 | 2021-09-02      |
| hCoV-19/Japan/PG-78743/2021 | EPI_ISL_3890003 | 2021-09-02      |
| hCoV-19/Japan/PG-78744/2021 | EPI_ISL_3890006 | 2021-09-02      |
| hCoV-19/Japan/PG-78745/2021 | EPI_ISL_3890009 | 2021-09-02      |
| hCoV-19/Japan/PG-78746/2021 | EPI_ISL_3890012 | 2021-09-02      |
| hCoV-19/Japan/PG-78747/2021 | EPI_ISL_3890014 | 2021-09-02      |
| hCoV-19/Japan/PG-78748/2021 | EPI_ISL_3890017 | 2021-09-02      |
| hCoV-19/Japan/PG-78749/2021 | EPI_ISL_3890020 | 2021-09-02      |
| hCoV-19/Japan/PG-78750/2021 | EPI_ISL_3890022 | 2021-09-02      |
| hCoV-19/Japan/PG-78751/2021 | EPI_ISL_3890025 | 2021-09-02      |
| hCoV-19/Japan/PG-78752/2021 | EPI_ISL_3890027 | 2021-09-02      |
| hCoV-19/Japan/PG-78753/2021 | EPI_ISL_3890029 | 2021-09-02      |
| hCoV-19/Japan/PG-78754/2021 | EPI_ISL_3890032 | 2021-09-02      |
| hCoV-19/Japan/PG-78755/2021 | EPI_ISL_3890033 | 2021-09-02      |
| hCoV-19/Japan/PG-78756/2021 | EPI_ISL_3890034 | 2021-09-02      |
| hCoV-19/Japan/PG-78757/2021 | EPI_ISL_3890036 | 2021-09-02      |
| hCoV-19/Japan/PG-78758/2021 | EPI_ISL_3890039 | 2021-09-02      |
| hCoV-19/Japan/PG-78759/2021 | EPI_ISL_3890041 | 2021-09-02      |
| hCoV-19/Japan/PG-78760/2021 | EPI_ISL_3890044 | 2021-09-02      |
| hCoV-19/Japan/PG-78761/2021 | EPI_ISL_3890047 | 2021-09-02      |
| hCoV-19/Japan/PG-78762/2021 | EPI_ISL_3890050 | 2021-09-02      |
| hCoV-19/Japan/PG-78763/2021 | EPI_ISL_3890053 | 2021-09-02      |
| hCoV-19/Japan/PG-78764/2021 | EPI_ISL_3890055 | 2021-09-02      |
| hCoV-19/Japan/PG-78765/2021 | EPI_ISL_3890057 | 2021-09-02      |
| hCoV-19/Japan/PG-78766/2021 | EPI_ISL_3890059 | 2021-09-02      |
| hCoV-19/Japan/PG-78767/2021 | EPI_ISL_3890061 | 2021-09-02      |
| hCoV-19/Japan/PG-78768/2021 | EPI_ISL_3890064 | 2021-09-02      |
| hCoV-19/Japan/PG-78769/2021 | EPI_ISL_3890066 | 2021-09-02      |
| hCoV-19/Japan/PG-78770/2021 | EPI_ISL_3890068 | 2021-09-02      |
| hCoV-19/Japan/PG-78771/2021 | EPI_ISL_3890071 | 2021-09-02      |
| hCoV-19/Japan/PG-78772/2021 | EPI_ISL_3890074 | 2021-09-02      |
| hCoV-19/Japan/PG-78773/2021 | EPI_ISL_3890076 | 2021-09-02      |
| hCoV-19/Japan/PG-78774/2021 | EPI_ISL_3890079 | 2021-09-02      |
| hCoV-19/Japan/PG-78775/2021 | EPI_ISL_3890081 | 2021-09-02      |
| hCoV-19/Japan/PG-78776/2021 | EPI_ISL_3890084 | 2021-09-02      |
| hCoV-19/Japan/PG-78777/2021 | EPI_ISL_3890087 | 2021-09-02      |

| virus_name                  | epiID           | submission_date |
|-----------------------------|-----------------|-----------------|
| hCoV-19/Japan/PG-78778/2021 | EPI_ISL_3890089 | 2021-09-02      |
| hCoV-19/Japan/PG-78779/2021 | EPI_ISL_3890092 | 2021-09-02      |
| hCoV-19/Japan/PG-78780/2021 | EPI_ISL_3890094 | 2021-09-02      |
| hCoV-19/Japan/PG-78781/2021 | EPI_ISL_3890098 | 2021-09-02      |
| hCoV-19/Japan/PG-78782/2021 | EPI_ISL_3890101 | 2021-09-02      |
| hCoV-19/Japan/PG-78783/2021 | EPI_ISL_3890103 | 2021-09-02      |
| hCoV-19/Japan/PG-78784/2021 | EPI_ISL_3890106 | 2021-09-02      |
| hCoV-19/Japan/PG-78785/2021 | EPI_ISL_3890109 | 2021-09-02      |
| hCoV-19/Japan/PG-78786/2021 | EPI_ISL_3890111 | 2021-09-02      |
| hCoV-19/Japan/PG-78787/2021 | EPI_ISL_3890114 | 2021-09-02      |
| hCoV-19/Japan/PG-78788/2021 | EPI_ISL_3890116 | 2021-09-02      |
| hCoV-19/Japan/PG-78789/2021 | EPI_ISL_3890119 | 2021-09-02      |
| hCoV-19/Japan/PG-78790/2021 | EPI_ISL_3890122 | 2021-09-02      |
| hCoV-19/Japan/PG-78791/2021 | EPI_ISL_3890125 | 2021-09-02      |
| hCoV-19/Japan/PG-78792/2021 | EPI_ISL_3890128 | 2021-09-02      |
| hCoV-19/Japan/PG-78793/2021 | EPI_ISL_3890131 | 2021-09-02      |
| hCoV-19/Japan/PG-78794/2021 | EPI_ISL_3890133 | 2021-09-02      |
| hCoV-19/Japan/PG-78795/2021 | EPI_ISL_3890135 | 2021-09-02      |
| hCoV-19/Japan/PG-78796/2021 | EPI_ISL_3890138 | 2021-09-02      |
| hCoV-19/Japan/PG-78797/2021 | EPI_ISL_3890140 | 2021-09-02      |
| hCoV-19/Japan/PG-78798/2021 | EPI_ISL_3890143 | 2021-09-02      |
| hCoV-19/Japan/PG-78799/2021 | EPI_ISL_3890146 | 2021-09-02      |
| hCoV-19/Japan/PG-78800/2021 | EPI_ISL_3890148 | 2021-09-02      |
| hCoV-19/Japan/PG-78801/2021 | EPI_ISL_3890151 | 2021-09-02      |
| hCoV-19/Japan/PG-78802/2021 | EPI_ISL_3890154 | 2021-09-02      |
| hCoV-19/Japan/PG-78803/2021 | EPI_ISL_3890156 | 2021-09-02      |
| hCoV-19/Japan/PG-78804/2021 | EPI_ISL_3890159 | 2021-09-02      |
| hCoV-19/Japan/PG-78805/2021 | EPI_ISL_3890162 | 2021-09-02      |
| hCoV-19/Japan/PG-78806/2021 | EPI_ISL_3890165 | 2021-09-02      |
| hCoV-19/Japan/PG-78807/2021 | EPI_ISL_3890167 | 2021-09-02      |
| hCoV-19/Japan/PG-78808/2021 | EPI_ISL_3890170 | 2021-09-02      |
| hCoV-19/Japan/PG-78809/2021 | EPI_ISL_3890173 | 2021-09-02      |
| hCoV-19/Japan/PG-78810/2021 | EPI_ISL_3890175 | 2021-09-02      |
| hCoV-19/Japan/PG-78811/2021 | EPI_ISL_3890177 | 2021-09-02      |
| hCoV-19/Japan/PG-78812/2021 | EPI_ISL_3890179 | 2021-09-02      |
| hCoV-19/Japan/PG-78813/2021 | EPI_ISL_3890182 | 2021-09-02      |
| hCoV-19/Japan/PG-78814/2021 | EPI_ISL_3890184 | 2021-09-02      |
| hCoV-19/Japan/PG-78815/2021 | EPI_ISL_3890187 | 2021-09-02      |
| hCoV-19/Japan/PG-78816/2021 | EPI_ISL_3890190 | 2021-09-02      |
| hCoV-19/Japan/PG-78817/2021 | EPI_ISL_3890192 | 2021-09-02      |
| hCoV-19/Japan/PG-78818/2021 | EPI_ISL_3890194 | 2021-09-02      |
| hCoV-19/Japan/PG-78819/2021 | EPI_ISL_3890197 | 2021-09-02      |
| hCoV-19/Japan/PG-78820/2021 | EPI_ISL_3890199 | 2021-09-02      |
| hCoV-19/Japan/PG-78821/2021 | EPI_ISL_3890202 | 2021-09-02      |
| hCoV-19/Japan/PG-78822/2021 | EPI_ISL_3890203 | 2021-09-02      |
| hCoV-19/Japan/PG-78823/2021 | EPI_ISL_3890204 | 2021-09-02      |
| hCoV-19/Japan/PG-78824/2021 | EPI_ISL_3890206 | 2021-09-02      |
| hCoV-19/Japan/PG-78825/2021 | EPI_ISL_3890209 | 2021-09-02      |
| hCoV-19/Japan/PG-78826/2021 | EPI_ISL_3890213 | 2021-09-02      |
| hCoV-19/Japan/PG-78827/2021 | EPI_ISL_3890215 | 2021-09-02      |
| hCoV-19/Japan/PG-78828/2021 | EPI_ISL_3890218 | 2021-09-02      |
| hCoV-19/Japan/PG-78829/2021 | EPI_ISL_3890220 | 2021-09-02      |
| hCoV-19/Japan/PG-78830/2021 | EPI_ISL_3890223 | 2021-09-02      |
| hCoV-19/Japan/PG-78831/2021 | EPI_ISL_3890225 | 2021-09-02      |

| virus_name                  | epiID           | submission_date |
|-----------------------------|-----------------|-----------------|
| hCoV-19/Japan/PG-78832/2021 | EPI_ISL_3890228 | 2021-09-02      |
| hCoV-19/Japan/PG-78833/2021 | EPI_ISL_3890230 | 2021-09-02      |
| hCoV-19/Japan/PG-78834/2021 | EPI_ISL_3890232 | 2021-09-02      |
| hCoV-19/Japan/PG-78835/2021 | EPI_ISL_3890236 | 2021-09-02      |
| hCoV-19/Japan/PG-78836/2021 | EPI_ISL_3890238 | 2021-09-02      |
| hCoV-19/Japan/PG-78837/2021 | EPI_ISL_3890240 | 2021-09-02      |
| hCoV-19/Japan/PG-78838/2021 | EPI_ISL_3890243 | 2021-09-02      |
| hCoV-19/Japan/PG-78839/2021 | EPI_ISL_3890246 | 2021-09-02      |
| hCoV-19/Japan/PG-78840/2021 | EPI_ISL_3890249 | 2021-09-02      |
| hCoV-19/Japan/PG-78841/2021 | EPI_ISL_3890252 | 2021-09-02      |
| hCoV-19/Japan/PG-78842/2021 | EPI_ISL_3890255 | 2021-09-02      |
| hCoV-19/Japan/PG-78843/2021 | EPI_ISL_3890259 | 2021-09-02      |
| hCoV-19/Japan/PG-78844/2021 | EPI_ISL_3890261 | 2021-09-02      |
| hCoV-19/Japan/PG-78845/2021 | EPI_ISL_3890264 | 2021-09-02      |
| hCoV-19/Japan/PG-78846/2021 | EPI_ISL_3890267 | 2021-09-02      |
| hCoV-19/Japan/PG-78847/2021 | EPI_ISL_3890270 | 2021-09-02      |
| hCoV-19/Japan/PG-78848/2021 | EPI_ISL_3890273 | 2021-09-02      |
| hCoV-19/Japan/PG-78849/2021 | EPI_ISL_3890275 | 2021-09-02      |
| hCoV-19/Japan/PG-78850/2021 | EPI_ISL_3890278 | 2021-09-02      |
| hCoV-19/Japan/PG-78851/2021 | EPI_ISL_3890280 | 2021-09-02      |
| hCoV-19/Japan/PG-78852/2021 | EPI_ISL_3890283 | 2021-09-02      |
| hCoV-19/Japan/PG-78853/2021 | EPI_ISL_3890285 | 2021-09-02      |
| hCoV-19/Japan/PG-78854/2021 | EPI_ISL_3890288 | 2021-09-02      |
| hCoV-19/Japan/PG-78855/2021 | EPI_ISL_3890291 | 2021-09-02      |
| hCoV-19/Japan/PG-78856/2021 | EPI_ISL_3890293 | 2021-09-02      |
| hCoV-19/Japan/PG-78857/2021 | EPI_ISL_3890294 | 2021-09-02      |
| hCoV-19/Japan/PG-78858/2021 | EPI_ISL_3890296 | 2021-09-02      |
| hCoV-19/Japan/PG-78859/2021 | EPI_ISL_3890299 | 2021-09-02      |
| hCoV-19/Japan/PG-78860/2021 | EPI_ISL_3890301 | 2021-09-02      |
| hCoV-19/Japan/PG-78861/2021 | EPI_ISL_3890302 | 2021-09-02      |
| hCoV-19/Japan/PG-78862/2021 | EPI_ISL_3890305 | 2021-09-02      |
| hCoV-19/Japan/PG-78863/2021 | EPI_ISL_3904455 | 2021-09-02      |
| hCoV-19/Japan/PG-78864/2021 | EPI_ISL_3904458 | 2021-09-02      |
| hCoV-19/Japan/PG-78865/2021 | EPI_ISL_3904462 | 2021-09-02      |
| hCoV-19/Japan/PG-78866/2021 | EPI_ISL_3904465 | 2021-09-02      |
| hCoV-19/Japan/PG-78867/2021 | EPI_ISL_3904467 | 2021-09-02      |
| hCoV-19/Japan/PG-78868/2021 | EPI_ISL_3904468 | 2021-09-02      |
| hCoV-19/Japan/PG-78869/2021 | EPI_ISL_3904469 | 2021-09-02      |
| hCoV-19/Japan/PG-78870/2021 | EPI_ISL_3904470 | 2021-09-02      |
| hCoV-19/Japan/PG-78871/2021 | EPI_ISL_3904471 | 2021-09-02      |
| hCoV-19/Japan/PG-78872/2021 | EPI_ISL_3904472 | 2021-09-02      |
| hCoV-19/Japan/PG-78873/2021 | EPI_ISL_3904473 | 2021-09-02      |
| hCoV-19/Japan/PG-78874/2021 | EPI_ISL_3904474 | 2021-09-02      |
| hCoV-19/Japan/PG-78875/2021 | EPI_ISL_3904475 | 2021-09-02      |
| hCoV-19/Japan/PG-78876/2021 | EPI_ISL_3904476 | 2021-09-02      |
| hCoV-19/Japan/PG-78877/2021 | EPI_ISL_3904477 | 2021-09-02      |
| hCoV-19/Japan/PG-78878/2021 | EPI_ISL_3904478 | 2021-09-02      |
| hCoV-19/Japan/PG-78879/2021 | EPI_ISL_3904479 | 2021-09-02      |
| hCoV-19/Japan/PG-78880/2021 | EPI_ISL_3904480 | 2021-09-02      |
| hCoV-19/Japan/PG-78881/2021 | EPI_ISL_3904481 | 2021-09-02      |
| hCoV-19/Japan/PG-78882/2021 | EPI_ISL_3904482 | 2021-09-02      |
| hCoV-19/Japan/PG-78883/2021 | EPI_ISL_3904483 | 2021-09-02      |
| hCoV-19/Japan/PG-78884/2021 | EPI_ISL_3904484 | 2021-09-02      |
| hCoV-19/Japan/PG-78885/2021 | EPI_ISL_3904485 | 2021-09-02      |

| virus_name                  | epiID           | submission_date |
|-----------------------------|-----------------|-----------------|
| hCoV-19/Japan/PG-78886/2021 | EPI_ISL_3904486 | 2021-09-02      |
| hCoV-19/Japan/PG-78887/2021 | EPI_ISL_3904487 | 2021-09-02      |
| hCoV-19/Japan/PG-78888/2021 | EPI_ISL_3904488 | 2021-09-02      |
| hCoV-19/Japan/PG-78889/2021 | EPI_ISL_3904489 | 2021-09-02      |
| hCoV-19/Japan/PG-78890/2021 | EPI_ISL_3904490 | 2021-09-02      |
| hCoV-19/Japan/PG-78891/2021 | EPI_ISL_3904491 | 2021-09-02      |
| hCoV-19/Japan/PG-78892/2021 | EPI_ISL_3904492 | 2021-09-02      |
| hCoV-19/Japan/PG-78893/2021 | EPI_ISL_3904493 | 2021-09-02      |
| hCoV-19/Japan/PG-78894/2021 | EPI_ISL_3904494 | 2021-09-02      |
| hCoV-19/Japan/PG-78895/2021 | EPI_ISL_3904495 | 2021-09-02      |
| hCoV-19/Japan/PG-78896/2021 | EPI_ISL_3904496 | 2021-09-02      |
| hCoV-19/Japan/PG-78897/2021 | EPI_ISL_3904497 | 2021-09-02      |
| hCoV-19/Japan/PG-78898/2021 | EPI_ISL_3904498 | 2021-09-02      |
| hCoV-19/Japan/PG-78899/2021 | EPI_ISL_3904499 | 2021-09-02      |
| hCoV-19/Japan/PG-78900/2021 | EPI_ISL_3904500 | 2021-09-02      |
| hCoV-19/Japan/PG-78901/2021 | EPI_ISL_3904501 | 2021-09-02      |
| hCoV-19/Japan/PG-78902/2021 | EPI_ISL_3904502 | 2021-09-02      |
| hCoV-19/Japan/PG-78903/2021 | EPI_ISL_3904503 | 2021-09-02      |
| hCoV-19/Japan/PG-78904/2021 | EPI_ISL_3904504 | 2021-09-02      |
| hCoV-19/Japan/PG-78905/2021 | EPI_ISL_3904505 | 2021-09-02      |
| hCoV-19/Japan/PG-78906/2021 | EPI_ISL_3904506 | 2021-09-02      |
| hCoV-19/Japan/PG-78907/2021 | EPI_ISL_3904507 | 2021-09-02      |
| hCoV-19/Japan/PG-78908/2021 | EPI_ISL_3904508 | 2021-09-02      |
| hCoV-19/Japan/PG-78909/2021 | EPI_ISL_3904509 | 2021-09-02      |
| hCoV-19/Japan/PG-78910/2021 | EPI_ISL_3904510 | 2021-09-02      |
| hCoV-19/Japan/PG-78911/2021 | EPI_ISL_3904511 | 2021-09-02      |
| hCoV-19/Japan/PG-78912/2021 | EPI_ISL_3904512 | 2021-09-02      |
| hCoV-19/Japan/PG-78913/2021 | EPI_ISL_3904513 | 2021-09-02      |
| hCoV-19/Japan/PG-78914/2021 | EPI_ISL_3904514 | 2021-09-02      |
| hCoV-19/Japan/PG-78915/2021 | EPI_ISL_3904515 | 2021-09-02      |
| hCoV-19/Japan/PG-78916/2021 | EPI_ISL_3904516 | 2021-09-02      |
| hCoV-19/Japan/PG-78917/2021 | EPI_ISL_3904517 | 2021-09-02      |
| hCoV-19/Japan/PG-78918/2021 | EPI_ISL_3890309 | 2021-09-02      |
| hCoV-19/Japan/PG-78919/2021 | EPI_ISL_3890311 | 2021-09-02      |
| hCoV-19/Japan/PG-78920/2021 | EPI_ISL_3890314 | 2021-09-02      |
| hCoV-19/Japan/PG-78921/2021 | EPI_ISL_3890316 | 2021-09-02      |
| hCoV-19/Japan/PG-78922/2021 | EPI_ISL_3890319 | 2021-09-02      |
| hCoV-19/Japan/PG-78923/2021 | EPI_ISL_3890321 | 2021-09-02      |
| hCoV-19/Japan/PG-78924/2021 | EPI_ISL_3890324 | 2021-09-02      |
| hCoV-19/Japan/PG-78925/2021 | EPI_ISL_3890326 | 2021-09-02      |
| hCoV-19/Japan/PG-78926/2021 | EPI_ISL_3890329 | 2021-09-02      |
| hCoV-19/Japan/PG-78927/2021 | EPI_ISL_3890332 | 2021-09-02      |
| hCoV-19/Japan/PG-78928/2021 | EPI_ISL_3890334 | 2021-09-02      |
| hCoV-19/Japan/PG-78929/2021 | EPI_ISL_3890337 | 2021-09-02      |
| hCoV-19/Japan/PG-78930/2021 | EPI_ISL_3890339 | 2021-09-02      |
| hCoV-19/Japan/PG-78931/2021 | EPI_ISL_3890341 | 2021-09-02      |
| hCoV-19/Japan/PG-78932/2021 | EPI_ISL_3890343 | 2021-09-02      |
| hCoV-19/Japan/PG-78933/2021 | EPI_ISL_3890345 | 2021-09-02      |
| hCoV-19/Japan/PG-78934/2021 | EPI_ISL_3890348 | 2021-09-02      |
| hCoV-19/Japan/PG-78935/2021 | EPI_ISL_3890352 | 2021-09-02      |
| hCoV-19/Japan/PG-78936/2021 | EPI_ISL_3890354 | 2021-09-02      |
| hCoV-19/Japan/PG-78937/2021 | EPI_ISL_3890355 | 2021-09-02      |
| hCoV-19/Japan/PG-78938/2021 | EPI_ISL_3890357 | 2021-09-02      |
| hCoV-19/Japan/PG-78939/2021 | EPI_ISL_3890359 | 2021-09-02      |



| virus_name                  | epiID           | submission_date |
|-----------------------------|-----------------|-----------------|
| hCoV-19/Japan/PG-78940/2021 | EPI_ISL_3890362 | 2021-09-02      |
| hCoV-19/Japan/PG-78941/2021 | EPI_ISL_3890365 | 2021-09-02      |
| hCoV-19/Japan/PG-78942/2021 | EPI_ISL_3890368 | 2021-09-02      |
| hCoV-19/Japan/PG-78943/2021 | EPI_ISL_3890370 | 2021-09-02      |
| hCoV-19/Japan/PG-78944/2021 | EPI_ISL_3890373 | 2021-09-02      |
| hCoV-19/Japan/PG-78945/2021 | EPI_ISL_3890375 | 2021-09-02      |
| hCoV-19/Japan/PG-78946/2021 | EPI_ISL_3890378 | 2021-09-02      |
| hCoV-19/Japan/PG-78947/2021 | EPI_ISL_3890381 | 2021-09-02      |
| hCoV-19/Japan/PG-78948/2021 | EPI_ISL_3890384 | 2021-09-02      |
| hCoV-19/Japan/PG-78949/2021 | EPI_ISL_3890386 | 2021-09-02      |
| hCoV-19/Japan/PG-78950/2021 | EPI_ISL_3890388 | 2021-09-02      |
| hCoV-19/Japan/PG-78951/2021 | EPI_ISL_3890390 | 2021-09-02      |
| hCoV-19/Japan/PG-78952/2021 | EPI_ISL_3890392 | 2021-09-02      |
| hCoV-19/Japan/PG-78953/2021 | EPI_ISL_3890395 | 2021-09-02      |
| hCoV-19/Japan/PG-78954/2021 | EPI_ISL_3890398 | 2021-09-02      |
| hCoV-19/Japan/PG-78955/2021 | EPI_ISL_3890401 | 2021-09-02      |
| hCoV-19/Japan/PG-78956/2021 | EPI_ISL_3890403 | 2021-09-02      |
| hCoV-19/Japan/PG-78957/2021 | EPI_ISL_3890405 | 2021-09-02      |
| hCoV-19/Japan/PG-78958/2021 | EPI_ISL_3890408 | 2021-09-02      |
| hCoV-19/Japan/PG-78959/2021 | EPI_ISL_3890410 | 2021-09-02      |
| hCoV-19/Japan/PG-78960/2021 | EPI_ISL_3890411 | 2021-09-02      |
| hCoV-19/Japan/PG-78961/2021 | EPI_ISL_3890414 | 2021-09-02      |
| hCoV-19/Japan/PG-78962/2021 | EPI_ISL_3890417 | 2021-09-02      |
| hCoV-19/Japan/PG-78963/2021 | EPI_ISL_3890419 | 2021-09-02      |
| hCoV-19/Japan/PG-78964/2021 | EPI_ISL_3890422 | 2021-09-02      |
| hCoV-19/Japan/PG-78965/2021 | EPI_ISL_3890425 | 2021-09-02      |
| hCoV-19/Japan/PG-78966/2021 | EPI_ISL_3890428 | 2021-09-02      |
| hCoV-19/Japan/PG-78967/2021 | EPI_ISL_3890430 | 2021-09-02      |
| hCoV-19/Japan/PG-78968/2021 | EPI_ISL_3890433 | 2021-09-02      |
| hCoV-19/Japan/PG-78969/2021 | EPI_ISL_3890436 | 2021-09-02      |
| hCoV-19/Japan/PG-78970/2021 | EPI_ISL_3890439 | 2021-09-02      |
| hCoV-19/Japan/PG-78971/2021 | EPI_ISL_3890442 | 2021-09-02      |
| hCoV-19/Japan/PG-78972/2021 | EPI_ISL_3890443 | 2021-09-02      |
| hCoV-19/Japan/PG-78973/2021 | EPI_ISL_3890445 | 2021-09-02      |
| hCoV-19/Japan/PG-78974/2021 | EPI_ISL_3890448 | 2021-09-02      |
| hCoV-19/Japan/PG-78975/2021 | EPI_ISL_3890450 | 2021-09-02      |
| hCoV-19/Japan/PG-78976/2021 | EPI_ISL_3890453 | 2021-09-02      |
| hCoV-19/Japan/PG-78977/2021 | EPI_ISL_3890456 | 2021-09-02      |
| hCoV-19/Japan/PG-78978/2021 | EPI_ISL_3890459 | 2021-09-02      |
| hCoV-19/Japan/PG-78979/2021 | EPI_ISL_3890462 | 2021-09-02      |
| hCoV-19/Japan/PG-78980/2021 | EPI_ISL_3890464 | 2021-09-02      |
| hCoV-19/Japan/PG-78981/2021 | EPI_ISL_3890467 | 2021-09-02      |
| hCoV-19/Japan/PG-78982/2021 | EPI_ISL_3890470 | 2021-09-02      |
| hCoV-19/Japan/PG-78983/2021 | EPI_ISL_3890472 | 2021-09-02      |
| hCoV-19/Japan/PG-78984/2021 | EPI_ISL_3890475 | 2021-09-02      |
| hCoV-19/Japan/PG-78985/2021 | EPI_ISL_3890478 | 2021-09-02      |
| hCoV-19/Japan/PG-78986/2021 | EPI_ISL_3890480 | 2021-09-02      |
| hCoV-19/Japan/PG-78987/2021 | EPI_ISL_3890483 | 2021-09-02      |
| hCoV-19/Japan/PG-78988/2021 | EPI_ISL_3890486 | 2021-09-02      |
| hCoV-19/Japan/PG-78989/2021 | EPI_ISL_3890489 | 2021-09-02      |
| hCoV-19/Japan/PG-78990/2021 | EPI_ISL_3890491 | 2021-09-02      |
| hCoV-19/Japan/PG-78991/2021 | EPI_ISL_3890492 | 2021-09-02      |
| hCoV-19/Japan/PG-78992/2021 | EPI_ISL_3890495 | 2021-09-02      |
| hCoV-19/Japan/PG-78993/2021 | EPI_ISL_3890496 | 2021-09-02      |

| virus_name                  | epiID           | submission_date |
|-----------------------------|-----------------|-----------------|
| hCoV-19/Japan/PG-78994/2021 | EPI_ISL_3890499 | 2021-09-02      |
| hCoV-19/Japan/PG-78995/2021 | EPI_ISL_3890502 | 2021-09-02      |
| hCoV-19/Japan/PG-78996/2021 | EPI_ISL_3890504 | 2021-09-02      |
| hCoV-19/Japan/PG-78997/2021 | EPI_ISL_3890507 | 2021-09-02      |
| hCoV-19/Japan/PG-78998/2021 | EPI_ISL_3890508 | 2021-09-02      |
| hCoV-19/Japan/PG-78999/2021 | EPI_ISL_3890511 | 2021-09-02      |
| hCoV-19/Japan/PG-79000/2021 | EPI_ISL_3890513 | 2021-09-02      |
| hCoV-19/Japan/PG-79001/2021 | EPI_ISL_3890515 | 2021-09-02      |
| hCoV-19/Japan/PG-79002/2021 | EPI_ISL_3890518 | 2021-09-02      |
| hCoV-19/Japan/PG-79003/2021 | EPI_ISL_3890520 | 2021-09-02      |
| hCoV-19/Japan/PG-79004/2021 | EPI_ISL_3890523 | 2021-09-02      |
| hCoV-19/Japan/PG-79005/2021 | EPI_ISL_3890525 | 2021-09-02      |
| hCoV-19/Japan/PG-79006/2021 | EPI_ISL_3890528 | 2021-09-02      |
| hCoV-19/Japan/PG-79007/2021 | EPI_ISL_3890530 | 2021-09-02      |
| hCoV-19/Japan/PG-79008/2021 | EPI_ISL_3890532 | 2021-09-02      |
| hCoV-19/Japan/PG-79009/2021 | EPI_ISL_3890535 | 2021-09-02      |
| hCoV-19/Japan/PG-79010/2021 | EPI_ISL_3890537 | 2021-09-02      |
| hCoV-19/Japan/PG-79011/2021 | EPI_ISL_3890539 | 2021-09-02      |
| hCoV-19/Japan/PG-79012/2021 | EPI_ISL_3890542 | 2021-09-02      |
| hCoV-19/Japan/PG-79013/2021 | EPI_ISL_3890544 | 2021-09-02      |
| hCoV-19/Japan/PG-79014/2021 | EPI_ISL_3890547 | 2021-09-02      |
| hCoV-19/Japan/PG-79015/2021 | EPI_ISL_3890549 | 2021-09-02      |
| hCoV-19/Japan/PG-79016/2021 | EPI_ISL_3890552 | 2021-09-02      |
| hCoV-19/Japan/PG-79017/2021 | EPI_ISL_3890554 | 2021-09-02      |
| hCoV-19/Japan/PG-79018/2021 | EPI_ISL_3890557 | 2021-09-02      |
| hCoV-19/Japan/PG-79019/2021 | EPI_ISL_3890558 | 2021-09-02      |
| hCoV-19/Japan/PG-79020/2021 | EPI_ISL_3890559 | 2021-09-02      |
| hCoV-19/Japan/PG-79021/2021 | EPI_ISL_3890560 | 2021-09-02      |
| hCoV-19/Japan/PG-79022/2021 | EPI_ISL_3890563 | 2021-09-02      |
| hCoV-19/Japan/PG-79023/2021 | EPI_ISL_3890565 | 2021-09-02      |
| hCoV-19/Japan/PG-79024/2021 | EPI_ISL_3890568 | 2021-09-02      |
| hCoV-19/Japan/PG-79025/2021 | EPI_ISL_3890571 | 2021-09-02      |
| hCoV-19/Japan/PG-79026/2021 | EPI_ISL_3890573 | 2021-09-02      |
| hCoV-19/Japan/PG-79027/2021 | EPI_ISL_3890576 | 2021-09-02      |
| hCoV-19/Japan/PG-79028/2021 | EPI_ISL_3890579 | 2021-09-02      |
| hCoV-19/Japan/PG-79029/2021 | EPI_ISL_3890581 | 2021-09-02      |
| hCoV-19/Japan/PG-79030/2021 | EPI_ISL_3890584 | 2021-09-02      |
| hCoV-19/Japan/PG-79031/2021 | EPI_ISL_3890587 | 2021-09-02      |
| hCoV-19/Japan/PG-79032/2021 | EPI_ISL_3890590 | 2021-09-02      |
| hCoV-19/Japan/PG-79033/2021 | EPI_ISL_3890592 | 2021-09-02      |
| hCoV-19/Japan/PG-79034/2021 | EPI_ISL_3890595 | 2021-09-02      |
| hCoV-19/Japan/PG-79035/2021 | EPI_ISL_3890597 | 2021-09-02      |
| hCoV-19/Japan/PG-79036/2021 | EPI_ISL_3890600 | 2021-09-02      |
| hCoV-19/Japan/PG-79037/2021 | EPI_ISL_3890602 | 2021-09-02      |
| hCoV-19/Japan/PG-79038/2021 | EPI_ISL_3890605 | 2021-09-02      |
| hCoV-19/Japan/PG-79039/2021 | EPI_ISL_3890607 | 2021-09-02      |
| hCoV-19/Japan/PG-79040/2021 | EPI_ISL_3890609 | 2021-09-02      |
| hCoV-19/Japan/PG-79041/2021 | EPI_ISL_3890612 | 2021-09-02      |
| hCoV-19/Japan/PG-79042/2021 | EPI_ISL_3890614 | 2021-09-02      |
| hCoV-19/Japan/PG-79043/2021 | EPI_ISL_3890616 | 2021-09-02      |
| hCoV-19/Japan/PG-79044/2021 | EPI_ISL_3890619 | 2021-09-02      |
| hCoV-19/Japan/PG-79045/2021 | EPI_ISL_3890622 | 2021-09-02      |
| hCoV-19/Japan/PG-79046/2021 | EPI_ISL_3890624 | 2021-09-02      |
| hCoV-19/Japan/PG-79047/2021 | EPI_ISL_3890627 | 2021-09-02      |

| virus_name                  | epiID           | submission_date |
|-----------------------------|-----------------|-----------------|
| hCoV-19/Japan/PG-79048/2021 | EPI_ISL_3890630 | 2021-09-02      |
| hCoV-19/Japan/PG-79049/2021 | EPI_ISL_3890632 | 2021-09-02      |
| hCoV-19/Japan/PG-79050/2021 | EPI_ISL_3890633 | 2021-09-02      |
| hCoV-19/Japan/PG-79051/2021 | EPI_ISL_3890634 | 2021-09-02      |
| hCoV-19/Japan/PG-79052/2021 | EPI_ISL_3890635 | 2021-09-02      |
| hCoV-19/Japan/PG-79053/2021 | EPI_ISL_3890636 | 2021-09-02      |
| hCoV-19/Japan/PG-79054/2021 | EPI_ISL_3890638 | 2021-09-02      |
| hCoV-19/Japan/PG-79055/2021 | EPI_ISL_3890640 | 2021-09-02      |
| hCoV-19/Japan/PG-79056/2021 | EPI_ISL_3890643 | 2021-09-02      |
| hCoV-19/Japan/PG-79057/2021 | EPI_ISL_3890645 | 2021-09-02      |
| hCoV-19/Japan/PG-79058/2021 | EPI_ISL_3890648 | 2021-09-02      |
| hCoV-19/Japan/PG-79059/2021 | EPI_ISL_3890650 | 2021-09-02      |
| hCoV-19/Japan/PG-79060/2021 | EPI_ISL_3890653 | 2021-09-02      |
| hCoV-19/Japan/PG-79061/2021 | EPI_ISL_3890657 | 2021-09-02      |
| hCoV-19/Japan/PG-79062/2021 | EPI_ISL_3890659 | 2021-09-02      |
| hCoV-19/Japan/PG-79063/2021 | EPI_ISL_3890662 | 2021-09-02      |
| hCoV-19/Japan/PG-79064/2021 | EPI_ISL_3890664 | 2021-09-02      |
| hCoV-19/Japan/PG-79065/2021 | EPI_ISL_3890667 | 2021-09-02      |
| hCoV-19/Japan/PG-79066/2021 | EPI_ISL_3890670 | 2021-09-02      |
| hCoV-19/Japan/PG-79067/2021 | EPI_ISL_3890672 | 2021-09-02      |
| hCoV-19/Japan/PG-79068/2021 | EPI_ISL_3890675 | 2021-09-02      |
| hCoV-19/Japan/PG-79069/2021 | EPI_ISL_3890678 | 2021-09-02      |
| hCoV-19/Japan/PG-79070/2021 | EPI_ISL_3890680 | 2021-09-02      |
| hCoV-19/Japan/PG-79071/2021 | EPI_ISL_3890684 | 2021-09-02      |
| hCoV-19/Japan/PG-79072/2021 | EPI_ISL_3890686 | 2021-09-02      |
| hCoV-19/Japan/PG-79073/2021 | EPI_ISL_3890689 | 2021-09-02      |
| hCoV-19/Japan/PG-79074/2021 | EPI_ISL_3890691 | 2021-09-02      |
| hCoV-19/Japan/PG-79075/2021 | EPI_ISL_3890694 | 2021-09-02      |
| hCoV-19/Japan/PG-79076/2021 | EPI_ISL_3890697 | 2021-09-02      |
| hCoV-19/Japan/PG-79077/2021 | EPI_ISL_3890699 | 2021-09-02      |
| hCoV-19/Japan/PG-79078/2021 | EPI_ISL_3890702 | 2021-09-02      |
| hCoV-19/Japan/PG-79079/2021 | EPI_ISL_3890704 | 2021-09-02      |
| hCoV-19/Japan/PG-79080/2021 | EPI_ISL_3890707 | 2021-09-02      |
| hCoV-19/Japan/PG-79081/2021 | EPI_ISL_3890709 | 2021-09-02      |
| hCoV-19/Japan/PG-79082/2021 | EPI_ISL_3890713 | 2021-09-02      |
| hCoV-19/Japan/PG-79083/2021 | EPI_ISL_3890715 | 2021-09-02      |
| hCoV-19/Japan/PG-79084/2021 | EPI_ISL_3890718 | 2021-09-02      |
| hCoV-19/Japan/PG-79085/2021 | EPI_ISL_3890721 | 2021-09-02      |
| hCoV-19/Japan/PG-79086/2021 | EPI_ISL_3890722 | 2021-09-02      |
| hCoV-19/Japan/PG-79087/2021 | EPI_ISL_3890725 | 2021-09-02      |
| hCoV-19/Japan/PG-79088/2021 | EPI_ISL_3890727 | 2021-09-02      |
| hCoV-19/Japan/PG-79089/2021 | EPI_ISL_3890729 | 2021-09-02      |
| hCoV-19/Japan/PG-79090/2021 | EPI_ISL_3890732 | 2021-09-02      |
| hCoV-19/Japan/PG-79091/2021 | EPI_ISL_3890733 | 2021-09-02      |
| hCoV-19/Japan/PG-79092/2021 | EPI_ISL_3890734 | 2021-09-02      |
| hCoV-19/Japan/PG-79093/2021 | EPI_ISL_3890735 | 2021-09-02      |
| hCoV-19/Japan/PG-79094/2021 | EPI_ISL_3890739 | 2021-09-02      |
| hCoV-19/Japan/PG-79095/2021 | EPI_ISL_3890742 | 2021-09-02      |
| hCoV-19/Japan/PG-79096/2021 | EPI_ISL_3890745 | 2021-09-02      |
| hCoV-19/Japan/PG-79097/2021 | EPI_ISL_3890748 | 2021-09-02      |
| hCoV-19/Japan/PG-79098/2021 | EPI_ISL_3890750 | 2021-09-02      |
| hCoV-19/Japan/PG-79099/2021 | EPI_ISL_3890753 | 2021-09-02      |
| hCoV-19/Japan/PG-79100/2021 | EPI_ISL_3890755 | 2021-09-02      |
| hCoV-19/Japan/PG-79101/2021 | EPI_ISL_3890757 | 2021-09-02      |

| virus_name                  | epiID           | submission_date |
|-----------------------------|-----------------|-----------------|
| hCoV-19/Japan/PG-79102/2021 | EPI_ISL_3890760 | 2021-09-02      |
| hCoV-19/Japan/PG-79103/2021 | EPI_ISL_3890762 | 2021-09-02      |
| hCoV-19/Japan/PG-79104/2021 | EPI_ISL_3890765 | 2021-09-02      |
| hCoV-19/Japan/PG-79105/2021 | EPI_ISL_3890767 | 2021-09-02      |
| hCoV-19/Japan/PG-79106/2021 | EPI_ISL_3890768 | 2021-09-02      |
| hCoV-19/Japan/PG-79107/2021 | EPI_ISL_3890771 | 2021-09-02      |
| hCoV-19/Japan/PG-79108/2021 | EPI_ISL_3890773 | 2021-09-02      |
| hCoV-19/Japan/PG-79109/2021 | EPI_ISL_3890776 | 2021-09-02      |
| hCoV-19/Japan/PG-79110/2021 | EPI_ISL_3890778 | 2021-09-02      |
| hCoV-19/Japan/PG-79111/2021 | EPI_ISL_3890779 | 2021-09-02      |
| hCoV-19/Japan/PG-79112/2021 | EPI_ISL_3890782 | 2021-09-02      |
| hCoV-19/Japan/PG-79113/2021 | EPI_ISL_3890784 | 2021-09-02      |
| hCoV-19/Japan/PG-79114/2021 | EPI_ISL_3890787 | 2021-09-02      |
| hCoV-19/Japan/PG-79115/2021 | EPI_ISL_3890789 | 2021-09-02      |
| hCoV-19/Japan/PG-79116/2021 | EPI_ISL_3890792 | 2021-09-02      |
| hCoV-19/Japan/PG-79117/2021 | EPI_ISL_3890794 | 2021-09-02      |
| hCoV-19/Japan/PG-79118/2021 | EPI_ISL_3890796 | 2021-09-02      |
| hCoV-19/Japan/PG-79119/2021 | EPI_ISL_3890799 | 2021-09-02      |
| hCoV-19/Japan/PG-79120/2021 | EPI_ISL_3890802 | 2021-09-02      |
| hCoV-19/Japan/PG-79121/2021 | EPI_ISL_3890804 | 2021-09-02      |
| hCoV-19/Japan/PG-79122/2021 | EPI_ISL_3890807 | 2021-09-02      |
| hCoV-19/Japan/PG-79123/2021 | EPI_ISL_3890809 | 2021-09-02      |
| hCoV-19/Japan/PG-79124/2021 | EPI_ISL_3890812 | 2021-09-02      |
| hCoV-19/Japan/PG-79125/2021 | EPI_ISL_3890815 | 2021-09-02      |
| hCoV-19/Japan/PG-79126/2021 | EPI_ISL_3890816 | 2021-09-02      |
| hCoV-19/Japan/PG-79127/2021 | EPI_ISL_3890819 | 2021-09-02      |
| hCoV-19/Japan/PG-79128/2021 | EPI_ISL_3890822 | 2021-09-02      |
| hCoV-19/Japan/PG-79129/2021 | EPI_ISL_3890824 | 2021-09-02      |
| hCoV-19/Japan/PG-79130/2021 | EPI_ISL_3890827 | 2021-09-02      |
| hCoV-19/Japan/PG-79131/2021 | EPI_ISL_3890830 | 2021-09-02      |
| hCoV-19/Japan/PG-79132/2021 | EPI_ISL_3890833 | 2021-09-02      |
| hCoV-19/Japan/PG-79133/2021 | EPI_ISL_3890836 | 2021-09-02      |
| hCoV-19/Japan/PG-79134/2021 | EPI_ISL_3890839 | 2021-09-02      |
| hCoV-19/Japan/PG-79135/2021 | EPI_ISL_3890842 | 2021-09-02      |
| hCoV-19/Japan/PG-79136/2021 | EPI_ISL_3890845 | 2021-09-02      |
| hCoV-19/Japan/PG-79137/2021 | EPI_ISL_3890847 | 2021-09-02      |
| hCoV-19/Japan/PG-79138/2021 | EPI_ISL_3890850 | 2021-09-02      |
| hCoV-19/Japan/PG-79139/2021 | EPI_ISL_3890853 | 2021-09-02      |
| hCoV-19/Japan/PG-79140/2021 | EPI_ISL_3890856 | 2021-09-02      |
| hCoV-19/Japan/PG-79141/2021 | EPI_ISL_3890858 | 2021-09-02      |
| hCoV-19/Japan/PG-79142/2021 | EPI_ISL_3890861 | 2021-09-02      |
| hCoV-19/Japan/PG-79143/2021 | EPI_ISL_3890864 | 2021-09-02      |
| hCoV-19/Japan/PG-79144/2021 | EPI_ISL_3890867 | 2021-09-02      |
| hCoV-19/Japan/PG-79145/2021 | EPI_ISL_3890870 | 2021-09-02      |
| hCoV-19/Japan/PG-79146/2021 | EPI_ISL_3890873 | 2021-09-02      |
| hCoV-19/Japan/PG-79147/2021 | EPI_ISL_3890876 | 2021-09-02      |
| hCoV-19/Japan/PG-79148/2021 | EPI_ISL_3890879 | 2021-09-02      |
| hCoV-19/Japan/PG-79149/2021 | EPI_ISL_3890882 | 2021-09-02      |
| hCoV-19/Japan/PG-79150/2021 | EPI_ISL_3890884 | 2021-09-02      |
| hCoV-19/Japan/PG-79151/2021 | EPI_ISL_3890886 | 2021-09-02      |
| hCoV-19/Japan/PG-79152/2021 | EPI_ISL_3890888 | 2021-09-02      |
| hCoV-19/Japan/PG-79153/2021 | EPI_ISL_3890891 | 2021-09-02      |
| hCoV-19/Japan/PG-79154/2021 | EPI_ISL_3890893 | 2021-09-02      |
| hCoV-19/Japan/PG-79155/2021 | EPI_ISL_3890896 | 2021-09-02      |

| virus_name                  | epiID           | submission_date |
|-----------------------------|-----------------|-----------------|
| hCoV-19/Japan/PG-79156/2021 | EPI_ISL_3890898 | 2021-09-02      |
| hCoV-19/Japan/PG-79157/2021 | EPI_ISL_3890899 | 2021-09-02      |
| hCoV-19/Japan/PG-79158/2021 | EPI_ISL_3890902 | 2021-09-02      |
| hCoV-19/Japan/PG-79159/2021 | EPI_ISL_3890905 | 2021-09-02      |
| hCoV-19/Japan/PG-79160/2021 | EPI_ISL_3890908 | 2021-09-02      |
| hCoV-19/Japan/PG-79161/2021 | EPI_ISL_3890911 | 2021-09-02      |
| hCoV-19/Japan/PG-79162/2021 | EPI_ISL_3890914 | 2021-09-02      |
| hCoV-19/Japan/PG-79163/2021 | EPI_ISL_3890917 | 2021-09-02      |
| hCoV-19/Japan/PG-79164/2021 | EPI_ISL_3890920 | 2021-09-02      |
| hCoV-19/Japan/PG-79165/2021 | EPI_ISL_3890923 | 2021-09-02      |
| hCoV-19/Japan/PG-79166/2021 | EPI_ISL_3890927 | 2021-09-02      |
| hCoV-19/Japan/PG-79167/2021 | EPI_ISL_3890930 | 2021-09-02      |
| hCoV-19/Japan/PG-79168/2021 | EPI_ISL_3890933 | 2021-09-02      |
| hCoV-19/Japan/PG-79169/2021 | EPI_ISL_3890936 | 2021-09-02      |
| hCoV-19/Japan/PG-79170/2021 | EPI_ISL_3890939 | 2021-09-02      |
| hCoV-19/Japan/PG-79171/2021 | EPI_ISL_3890942 | 2021-09-02      |
| hCoV-19/Japan/PG-79172/2021 | EPI_ISL_3890945 | 2021-09-02      |
| hCoV-19/Japan/PG-79173/2021 | EPI_ISL_3890948 | 2021-09-02      |
| hCoV-19/Japan/PG-79174/2021 | EPI_ISL_3890950 | 2021-09-02      |
| hCoV-19/Japan/PG-79175/2021 | EPI_ISL_3890951 | 2021-09-02      |
| hCoV-19/Japan/PG-79176/2021 | EPI_ISL_3890952 | 2021-09-02      |
| hCoV-19/Japan/PG-79177/2021 | EPI_ISL_3890953 | 2021-09-02      |
| hCoV-19/Japan/PG-79178/2021 | EPI_ISL_3890954 | 2021-09-02      |
| hCoV-19/Japan/PG-79179/2021 | EPI_ISL_3890955 | 2021-09-02      |
| hCoV-19/Japan/PG-79180/2021 | EPI_ISL_3890957 | 2021-09-02      |
| hCoV-19/Japan/PG-79181/2021 | EPI_ISL_3890959 | 2021-09-02      |
| hCoV-19/Japan/PG-79182/2021 | EPI_ISL_3890961 | 2021-09-02      |
| hCoV-19/Japan/PG-79183/2021 | EPI_ISL_3890963 | 2021-09-02      |
| hCoV-19/Japan/PG-79184/2021 | EPI_ISL_3890966 | 2021-09-02      |
| hCoV-19/Japan/PG-79185/2021 | EPI_ISL_3890969 | 2021-09-02      |
| hCoV-19/Japan/PG-79186/2021 | EPI_ISL_3890971 | 2021-09-02      |
| hCoV-19/Japan/PG-79187/2021 | EPI_ISL_3890973 | 2021-09-02      |
| hCoV-19/Japan/PG-79188/2021 | EPI_ISL_3890976 | 2021-09-02      |
| hCoV-19/Japan/PG-79189/2021 | EPI_ISL_3890978 | 2021-09-02      |
| hCoV-19/Japan/PG-79190/2021 | EPI_ISL_3890981 | 2021-09-02      |
| hCoV-19/Japan/PG-79191/2021 | EPI_ISL_3890984 | 2021-09-02      |
| hCoV-19/Japan/PG-79192/2021 | EPI_ISL_3890987 | 2021-09-02      |
| hCoV-19/Japan/PG-79193/2021 | EPI_ISL_3890990 | 2021-09-02      |
| hCoV-19/Japan/PG-79194/2021 | EPI_ISL_3890992 | 2021-09-02      |
| hCoV-19/Japan/PG-79195/2021 | EPI_ISL_3890995 | 2021-09-02      |
| hCoV-19/Japan/PG-79196/2021 | EPI_ISL_3890998 | 2021-09-02      |
| hCoV-19/Japan/PG-79197/2021 | EPI_ISL_3891001 | 2021-09-02      |
| hCoV-19/Japan/PG-79198/2021 | EPI_ISL_3891002 | 2021-09-02      |
| hCoV-19/Japan/PG-79199/2021 | EPI_ISL_3891003 | 2021-09-02      |
| hCoV-19/Japan/PG-79200/2021 | EPI_ISL_3891004 | 2021-09-02      |
| hCoV-19/Japan/PG-79201/2021 | EPI_ISL_3891005 | 2021-09-02      |
| hCoV-19/Japan/PG-79202/2021 | EPI_ISL_3891006 | 2021-09-02      |
| hCoV-19/Japan/PG-79203/2021 | EPI_ISL_3891007 | 2021-09-02      |
| hCoV-19/Japan/PG-79204/2021 | EPI_ISL_3891009 | 2021-09-02      |
| hCoV-19/Japan/PG-79205/2021 | EPI_ISL_3891012 | 2021-09-02      |
| hCoV-19/Japan/PG-79206/2021 | EPI_ISL_3891014 | 2021-09-02      |
| hCoV-19/Japan/PG-79207/2021 | EPI_ISL_3891015 | 2021-09-02      |
| hCoV-19/Japan/PG-79208/2021 | EPI_ISL_3891016 | 2021-09-02      |
| hCoV-19/Japan/PG-79209/2021 | EPI_ISL_3891017 | 2021-09-02      |

| virus_name                  | epiID           | submission_date |
|-----------------------------|-----------------|-----------------|
| hCoV-19/Japan/PG-79210/2021 | EPI_ISL_3891018 | 2021-09-02      |
| hCoV-19/Japan/PG-79211/2021 | EPI_ISL_3891019 | 2021-09-02      |
| hCoV-19/Japan/PG-79212/2021 | EPI_ISL_3891022 | 2021-09-02      |
| hCoV-19/Japan/PG-79213/2021 | EPI_ISL_3891025 | 2021-09-02      |
| hCoV-19/Japan/PG-79214/2021 | EPI_ISL_3891028 | 2021-09-02      |
| hCoV-19/Japan/PG-79215/2021 | EPI_ISL_3891030 | 2021-09-02      |
| hCoV-19/Japan/PG-79216/2021 | EPI_ISL_3891033 | 2021-09-02      |
| hCoV-19/Japan/PG-79217/2021 | EPI_ISL_3891035 | 2021-09-02      |
| hCoV-19/Japan/PG-79218/2021 | EPI_ISL_3891038 | 2021-09-02      |
| hCoV-19/Japan/PG-79219/2021 | EPI_ISL_3891041 | 2021-09-02      |
| hCoV-19/Japan/PG-79220/2021 | EPI_ISL_3891044 | 2021-09-02      |
| hCoV-19/Japan/PG-79221/2021 | EPI_ISL_3891046 | 2021-09-02      |
| hCoV-19/Japan/PG-79222/2021 | EPI_ISL_3891048 | 2021-09-02      |
| hCoV-19/Japan/PG-79223/2021 | EPI_ISL_3891050 | 2021-09-02      |
| hCoV-19/Japan/PG-79224/2021 | EPI_ISL_3891053 | 2021-09-02      |
| hCoV-19/Japan/PG-79225/2021 | EPI_ISL_3891056 | 2021-09-02      |
| hCoV-19/Japan/PG-79226/2021 | EPI_ISL_3891059 | 2021-09-02      |
| hCoV-19/Japan/PG-79227/2021 | EPI_ISL_3891061 | 2021-09-02      |
| hCoV-19/Japan/PG-79228/2021 | EPI_ISL_3891064 | 2021-09-02      |
| hCoV-19/Japan/PG-79229/2021 | EPI_ISL_3891066 | 2021-09-02      |
| hCoV-19/Japan/PG-79230/2021 | EPI_ISL_3891069 | 2021-09-02      |
| hCoV-19/Japan/PG-79231/2021 | EPI_ISL_3891071 | 2021-09-02      |
| hCoV-19/Japan/PG-79232/2021 | EPI_ISL_3891074 | 2021-09-02      |
| hCoV-19/Japan/PG-79233/2021 | EPI_ISL_3891076 | 2021-09-02      |
| hCoV-19/Japan/PG-79234/2021 | EPI_ISL_3891079 | 2021-09-02      |
| hCoV-19/Japan/PG-79235/2021 | EPI_ISL_3891081 | 2021-09-02      |
| hCoV-19/Japan/PG-79236/2021 | EPI_ISL_3891085 | 2021-09-02      |
| hCoV-19/Japan/PG-79237/2021 | EPI_ISL_3891087 | 2021-09-02      |
| hCoV-19/Japan/PG-79238/2021 | EPI_ISL_3891090 | 2021-09-02      |
| hCoV-19/Japan/PG-79239/2021 | EPI_ISL_3891093 | 2021-09-02      |
| hCoV-19/Japan/PG-79240/2021 | EPI_ISL_3891094 | 2021-09-02      |
| hCoV-19/Japan/PG-79241/2021 | EPI_ISL_3891096 | 2021-09-02      |
| hCoV-19/Japan/PG-79242/2021 | EPI_ISL_3891099 | 2021-09-02      |
| hCoV-19/Japan/PG-79243/2021 | EPI_ISL_3891100 | 2021-09-02      |
| hCoV-19/Japan/PG-79244/2021 | EPI_ISL_3891103 | 2021-09-02      |
| hCoV-19/Japan/PG-79245/2021 | EPI_ISL_3891106 | 2021-09-02      |
| hCoV-19/Japan/PG-79246/2021 | EPI_ISL_3891108 | 2021-09-02      |
| hCoV-19/Japan/PG-79247/2021 | EPI_ISL_3891110 | 2021-09-02      |
| hCoV-19/Japan/PG-79248/2021 | EPI_ISL_3891113 | 2021-09-02      |
| hCoV-19/Japan/PG-79249/2021 | EPI_ISL_3891115 | 2021-09-02      |
| hCoV-19/Japan/PG-79250/2021 | EPI_ISL_3891117 | 2021-09-02      |
| hCoV-19/Japan/PG-79251/2021 | EPI_ISL_3891119 | 2021-09-02      |
| hCoV-19/Japan/PG-79252/2021 | EPI_ISL_3891121 | 2021-09-02      |
| hCoV-19/Japan/PG-79253/2021 | EPI_ISL_3891123 | 2021-09-02      |
| hCoV-19/Japan/PG-79254/2021 | EPI_ISL_3891126 | 2021-09-02      |
| hCoV-19/Japan/PG-79255/2021 | EPI_ISL_3891128 | 2021-09-02      |
| hCoV-19/Japan/PG-79256/2021 | EPI_ISL_3891130 | 2021-09-02      |
| hCoV-19/Japan/PG-79257/2021 | EPI_ISL_3891132 | 2021-09-02      |
| hCoV-19/Japan/PG-79258/2021 | EPI_ISL_3891134 | 2021-09-02      |
| hCoV-19/Japan/PG-79259/2021 | EPI_ISL_3891137 | 2021-09-02      |
| hCoV-19/Japan/PG-79260/2021 | EPI_ISL_3891139 | 2021-09-02      |
| hCoV-19/Japan/PG-79261/2021 | EPI_ISL_3891141 | 2021-09-02      |
| hCoV-19/Japan/PG-79262/2021 | EPI_ISL_3891144 | 2021-09-02      |
| hCoV-19/Japan/PG-79263/2021 | EPI_ISL_3891147 | 2021-09-02      |

| virus_name                  | epiID           | submission_date |
|-----------------------------|-----------------|-----------------|
| hCoV-19/Japan/PG-79264/2021 | EPI_ISL_3891149 | 2021-09-02      |
| hCoV-19/Japan/PG-79265/2021 | EPI_ISL_3891152 | 2021-09-02      |
| hCoV-19/Japan/PG-79266/2021 | EPI_ISL_3891155 | 2021-09-02      |
| hCoV-19/Japan/PG-79267/2021 | EPI_ISL_3891158 | 2021-09-02      |
| hCoV-19/Japan/PG-79268/2021 | EPI_ISL_3891161 | 2021-09-02      |
| hCoV-19/Japan/PG-79269/2021 | EPI_ISL_3891163 | 2021-09-02      |
| hCoV-19/Japan/PG-79270/2021 | EPI_ISL_3891167 | 2021-09-02      |
| hCoV-19/Japan/PG-79271/2021 | EPI_ISL_3891169 | 2021-09-02      |
| hCoV-19/Japan/PG-79272/2021 | EPI_ISL_3891172 | 2021-09-02      |
| hCoV-19/Japan/PG-79273/2021 | EPI_ISL_3891175 | 2021-09-02      |
| hCoV-19/Japan/PG-79274/2021 | EPI_ISL_3891178 | 2021-09-02      |
| hCoV-19/Japan/PG-79275/2021 | EPI_ISL_3891180 | 2021-09-02      |
| hCoV-19/Japan/PG-79276/2021 | EPI_ISL_3891183 | 2021-09-02      |
| hCoV-19/Japan/PG-79277/2021 | EPI_ISL_3891186 | 2021-09-02      |
| hCoV-19/Japan/PG-79278/2021 | EPI_ISL_3891189 | 2021-09-02      |
| hCoV-19/Japan/PG-79279/2021 | EPI_ISL_3891191 | 2021-09-02      |
| hCoV-19/Japan/PG-79280/2021 | EPI_ISL_3891193 | 2021-09-02      |
| hCoV-19/Japan/PG-79281/2021 | EPI_ISL_3891195 | 2021-09-02      |
| hCoV-19/Japan/PG-79282/2021 | EPI_ISL_3891198 | 2021-09-02      |
| hCoV-19/Japan/PG-79283/2021 | EPI_ISL_3873313 | 2021-09-02      |
| hCoV-19/Japan/PG-79284/2021 | EPI_ISL_3873314 | 2021-09-02      |
| hCoV-19/Japan/PG-79285/2021 | EPI_ISL_3873315 | 2021-09-02      |
| hCoV-19/Japan/PG-79286/2021 | EPI_ISL_3873316 | 2021-09-02      |
| hCoV-19/Japan/PG-79287/2021 | EPI_ISL_3873317 | 2021-09-02      |
| hCoV-19/Japan/PG-79288/2021 | EPI_ISL_3873318 | 2021-09-02      |
| hCoV-19/Japan/PG-79289/2021 | EPI_ISL_3873319 | 2021-09-02      |
| hCoV-19/Japan/PG-79290/2021 | EPI_ISL_3873320 | 2021-09-02      |
| hCoV-19/Japan/PG-79291/2021 | EPI_ISL_3873321 | 2021-09-02      |
| hCoV-19/Japan/PG-79292/2021 | EPI_ISL_3873322 | 2021-09-02      |
| hCoV-19/Japan/PG-79293/2021 | EPI_ISL_3873323 | 2021-09-02      |
| hCoV-19/Japan/PG-79294/2021 | EPI_ISL_3873324 | 2021-09-02      |
| hCoV-19/Japan/PG-79295/2021 | EPI_ISL_3873325 | 2021-09-02      |
| hCoV-19/Japan/PG-79296/2021 | EPI_ISL_3873326 | 2021-09-02      |
| hCoV-19/Japan/PG-79297/2021 | EPI_ISL_3873327 | 2021-09-02      |
| hCoV-19/Japan/PG-79298/2021 | EPI_ISL_3873328 | 2021-09-02      |
| hCoV-19/Japan/PG-79299/2021 | EPI_ISL_3870527 | 2021-09-02      |
| hCoV-19/Japan/PG-79300/2021 | EPI_ISL_3870528 | 2021-09-02      |
| hCoV-19/Japan/PG-79301/2021 | EPI_ISL_3870529 | 2021-09-02      |
| hCoV-19/Japan/PG-79302/2021 | EPI_ISL_3870530 | 2021-09-02      |
| hCoV-19/Japan/PG-79303/2021 | EPI_ISL_3870531 | 2021-09-02      |
| hCoV-19/Japan/PG-79304/2021 | EPI_ISL_3870532 | 2021-09-02      |
| hCoV-19/Japan/PG-79305/2021 | EPI_ISL_3870533 | 2021-09-02      |
| hCoV-19/Japan/PG-79306/2021 | EPI_ISL_3870534 | 2021-09-02      |
| hCoV-19/Japan/PG-79307/2021 | EPI_ISL_3870535 | 2021-09-02      |
| hCoV-19/Japan/PG-79308/2021 | EPI_ISL_3870536 | 2021-09-02      |
| hCoV-19/Japan/PG-79309/2021 | EPI_ISL_3870537 | 2021-09-02      |
| hCoV-19/Japan/PG-79310/2021 | EPI_ISL_3870538 | 2021-09-02      |
| hCoV-19/Japan/PG-79311/2021 | EPI_ISL_3870539 | 2021-09-02      |
| hCoV-19/Japan/PG-79312/2021 | EPI_ISL_3870540 | 2021-09-02      |
| hCoV-19/Japan/PG-79313/2021 | EPI_ISL_3870541 | 2021-09-02      |
| hCoV-19/Japan/PG-79314/2021 | EPI_ISL_3870542 | 2021-09-02      |
| hCoV-19/Japan/PG-79315/2021 | EPI_ISL_3870543 | 2021-09-02      |
| hCoV-19/Japan/PG-79316/2021 | EPI_ISL_3870544 | 2021-09-02      |
| hCoV-19/Japan/PG-79317/2021 | EPI_ISL_3870545 | 2021-09-02      |

| virus_name                  | epiID           | submission_date |
|-----------------------------|-----------------|-----------------|
| hCoV-19/Japan/PG-79318/2021 | EPI_ISL_3870546 | 2021-09-02      |
| hCoV-19/Japan/PG-79319/2021 | EPI_ISL_3870547 | 2021-09-02      |
| hCoV-19/Japan/PG-79320/2021 | EPI_ISL_3870548 | 2021-09-02      |
| hCoV-19/Japan/PG-79321/2021 | EPI_ISL_3870648 | 2021-09-02      |
| hCoV-19/Japan/PG-79322/2021 | EPI_ISL_3870649 | 2021-09-02      |
| hCoV-19/Japan/PG-79323/2021 | EPI_ISL_3870650 | 2021-09-02      |
| hCoV-19/Japan/PG-79324/2021 | EPI_ISL_3870651 | 2021-09-02      |
| hCoV-19/Japan/PG-79325/2021 | EPI_ISL_3870652 | 2021-09-02      |
| hCoV-19/Japan/PG-79326/2021 | EPI_ISL_3870653 | 2021-09-02      |
| hCoV-19/Japan/PG-79327/2021 | EPI_ISL_3870654 | 2021-09-02      |
| hCoV-19/Japan/PG-79328/2021 | EPI_ISL_3870655 | 2021-09-02      |
| hCoV-19/Japan/PG-79329/2021 | EPI_ISL_3870656 | 2021-09-02      |
| hCoV-19/Japan/PG-79330/2021 | EPI_ISL_3870657 | 2021-09-02      |
| hCoV-19/Japan/PG-79331/2021 | EPI_ISL_3870658 | 2021-09-02      |
| hCoV-19/Japan/PG-79332/2021 | EPI_ISL_3870659 | 2021-09-02      |
| hCoV-19/Japan/PG-79333/2021 | EPI_ISL_3870660 | 2021-09-02      |
| hCoV-19/Japan/PG-79334/2021 | EPI_ISL_3870661 | 2021-09-02      |
| hCoV-19/Japan/PG-79335/2021 | EPI_ISL_3870662 | 2021-09-02      |
| hCoV-19/Japan/PG-79336/2021 | EPI_ISL_3870663 | 2021-09-02      |
| hCoV-19/Japan/PG-79337/2021 | EPI_ISL_3870664 | 2021-09-02      |
| hCoV-19/Japan/PG-79338/2021 | EPI_ISL_3870665 | 2021-09-02      |
| hCoV-19/Japan/PG-79339/2021 | EPI_ISL_3870666 | 2021-09-02      |
| hCoV-19/Japan/PG-79340/2021 | EPI_ISL_3870667 | 2021-09-02      |
| hCoV-19/Japan/PG-79341/2021 | EPI_ISL_3870668 | 2021-09-02      |
| hCoV-19/Japan/PG-79342/2021 | EPI_ISL_3870669 | 2021-09-02      |
| hCoV-19/Japan/PG-79343/2021 | EPI_ISL_3870670 | 2021-09-02      |
| hCoV-19/Japan/PG-79344/2021 | EPI_ISL_3870671 | 2021-09-02      |
| hCoV-19/Japan/PG-79345/2021 | EPI_ISL_3870672 | 2021-09-02      |
| hCoV-19/Japan/PG-79346/2021 | EPI_ISL_3870673 | 2021-09-02      |
| hCoV-19/Japan/PG-79347/2021 | EPI_ISL_3870674 | 2021-09-02      |
| hCoV-19/Japan/PG-79348/2021 | EPI_ISL_3870675 | 2021-09-02      |
| hCoV-19/Japan/PG-79349/2021 | EPI_ISL_3870676 | 2021-09-02      |
| hCoV-19/Japan/PG-79350/2021 | EPI_ISL_3870677 | 2021-09-02      |
| hCoV-19/Japan/PG-79351/2021 | EPI_ISL_3870678 | 2021-09-02      |
| hCoV-19/Japan/PG-79352/2021 | EPI_ISL_3870679 | 2021-09-02      |
| hCoV-19/Japan/PG-79353/2021 | EPI_ISL_3870680 | 2021-09-02      |
| hCoV-19/Japan/PG-79354/2021 | EPI_ISL_3870681 | 2021-09-02      |
| hCoV-19/Japan/PG-79355/2021 | EPI_ISL_3870682 | 2021-09-02      |
| hCoV-19/Japan/PG-79356/2021 | EPI_ISL_3870683 | 2021-09-02      |
| hCoV-19/Japan/PG-79357/2021 | EPI_ISL_3870684 | 2021-09-02      |
| hCoV-19/Japan/PG-79358/2021 | EPI_ISL_3870685 | 2021-09-02      |
| hCoV-19/Japan/PG-79359/2021 | EPI_ISL_3870686 | 2021-09-02      |
| hCoV-19/Japan/PG-79360/2021 | EPI_ISL_3870687 | 2021-09-02      |
| hCoV-19/Japan/PG-79361/2021 | EPI_ISL_3870688 | 2021-09-02      |
| hCoV-19/Japan/PG-79362/2021 | EPI_ISL_3870689 | 2021-09-02      |
| hCoV-19/Japan/PG-79363/2021 | EPI_ISL_3870690 | 2021-09-02      |
| hCoV-19/Japan/PG-79364/2021 | EPI_ISL_3870691 | 2021-09-02      |
| hCoV-19/Japan/PG-79365/2021 | EPI_ISL_3870692 | 2021-09-02      |
| hCoV-19/Japan/PG-79366/2021 | EPI_ISL_3870693 | 2021-09-02      |
| hCoV-19/Japan/PG-79367/2021 | EPI_ISL_3870694 | 2021-09-02      |
| hCoV-19/Japan/PG-79368/2021 | EPI_ISL_3870695 | 2021-09-02      |
| hCoV-19/Japan/PG-79369/2021 | EPI_ISL_3870696 | 2021-09-02      |
| hCoV-19/Japan/PG-79370/2021 | EPI_ISL_3870697 | 2021-09-02      |
| hCoV-19/Japan/PG-79371/2021 | EPI_ISL_3870698 | 2021-09-02      |



| virus_name                  | epiID           | submission_date |
|-----------------------------|-----------------|-----------------|
| hCoV-19/Japan/PG-79372/2021 | EPI_ISL_3870699 | 2021-09-02      |
| hCoV-19/Japan/PG-79373/2021 | EPI_ISL_3870700 | 2021-09-02      |
| hCoV-19/Japan/PG-79374/2021 | EPI_ISL_3870701 | 2021-09-02      |
| hCoV-19/Japan/PG-79375/2021 | EPI_ISL_3870702 | 2021-09-02      |
| hCoV-19/Japan/PG-79376/2021 | EPI_ISL_3870703 | 2021-09-02      |
| hCoV-19/Japan/PG-79377/2021 | EPI_ISL_3870704 | 2021-09-02      |
| hCoV-19/Japan/PG-79378/2021 | EPI_ISL_3870705 | 2021-09-02      |
| hCoV-19/Japan/PG-79379/2021 | EPI_ISL_3870706 | 2021-09-02      |
| hCoV-19/Japan/PG-79380/2021 | EPI_ISL_3870707 | 2021-09-02      |
| hCoV-19/Japan/PG-79381/2021 | EPI_ISL_3870708 | 2021-09-02      |
| hCoV-19/Japan/PG-79382/2021 | EPI_ISL_3870709 | 2021-09-02      |
| hCoV-19/Japan/PG-79383/2021 | EPI_ISL_3873295 | 2021-09-02      |
| hCoV-19/Japan/PG-79384/2021 | EPI_ISL_3873296 | 2021-09-02      |
| hCoV-19/Japan/PG-79385/2021 | EPI_ISL_3873297 | 2021-09-02      |
| hCoV-19/Japan/PG-79386/2021 | EPI_ISL_3873298 | 2021-09-02      |
| hCoV-19/Japan/PG-79387/2021 | EPI_ISL_3873299 | 2021-09-02      |
| hCoV-19/Japan/PG-79388/2021 | EPI_ISL_3873300 | 2021-09-02      |
| hCoV-19/Japan/PG-79389/2021 | EPI_ISL_3873301 | 2021-09-02      |
| hCoV-19/Japan/PG-79390/2021 | EPI_ISL_3873302 | 2021-09-02      |
| hCoV-19/Japan/PG-79391/2021 | EPI_ISL_3873303 | 2021-09-02      |
| hCoV-19/Japan/PG-79392/2021 | EPI_ISL_3873304 | 2021-09-02      |
| hCoV-19/Japan/PG-79393/2021 | EPI_ISL_3873305 | 2021-09-02      |
| hCoV-19/Japan/PG-79394/2021 | EPI_ISL_3873306 | 2021-09-02      |
| hCoV-19/Japan/PG-79395/2021 | EPI_ISL_3873307 | 2021-09-02      |
| hCoV-19/Japan/PG-79396/2021 | EPI_ISL_3873308 | 2021-09-02      |
| hCoV-19/Japan/PG-79397/2021 | EPI_ISL_3873309 | 2021-09-02      |
| hCoV-19/Japan/PG-79398/2021 | EPI_ISL_3873310 | 2021-09-02      |
| hCoV-19/Japan/PG-79399/2021 | EPI_ISL_3873311 | 2021-09-02      |
| hCoV-19/Japan/PG-79400/2021 | EPI_ISL_3873312 | 2021-09-02      |
| hCoV-19/Japan/PG-79401/2021 | EPI_ISL_3872710 | 2021-09-02      |
| hCoV-19/Japan/PG-79402/2021 | EPI_ISL_3872711 | 2021-09-02      |
| hCoV-19/Japan/PG-79403/2021 | EPI_ISL_3872712 | 2021-09-02      |
| hCoV-19/Japan/PG-79404/2021 | EPI_ISL_3872713 | 2021-09-02      |
| hCoV-19/Japan/PG-79405/2021 | EPI_ISL_3872714 | 2021-09-02      |
| hCoV-19/Japan/PG-79406/2021 | EPI_ISL_3872715 | 2021-09-02      |
| hCoV-19/Japan/PG-79407/2021 | EPI_ISL_3872716 | 2021-09-02      |
| hCoV-19/Japan/PG-79408/2021 | EPI_ISL_3872717 | 2021-09-02      |
| hCoV-19/Japan/PG-79409/2021 | EPI_ISL_3872718 | 2021-09-02      |
| hCoV-19/Japan/PG-79410/2021 | EPI_ISL_3872719 | 2021-09-02      |
| hCoV-19/Japan/PG-79411/2021 | EPI_ISL_3872720 | 2021-09-02      |
| hCoV-19/Japan/PG-79412/2021 | EPI_ISL_3872721 | 2021-09-02      |
| hCoV-19/Japan/PG-79413/2021 | EPI_ISL_3872722 | 2021-09-02      |
| hCoV-19/Japan/PG-79414/2021 | EPI_ISL_3872723 | 2021-09-02      |
| hCoV-19/Japan/PG-79415/2021 | EPI_ISL_3872724 | 2021-09-02      |
| hCoV-19/Japan/PG-79416/2021 | EPI_ISL_3872725 | 2021-09-02      |
| hCoV-19/Japan/PG-79417/2021 | EPI_ISL_3872726 | 2021-09-02      |
| hCoV-19/Japan/PG-79418/2021 | EPI_ISL_3872727 | 2021-09-02      |
| hCoV-19/Japan/PG-79419/2021 | EPI_ISL_3872728 | 2021-09-02      |
| hCoV-19/Japan/PG-79420/2021 | EPI_ISL_3872729 | 2021-09-02      |
| hCoV-19/Japan/PG-79421/2021 | EPI_ISL_3872730 | 2021-09-02      |
| hCoV-19/Japan/PG-79422/2021 | EPI_ISL_3872731 | 2021-09-02      |
| hCoV-19/Japan/PG-79423/2021 | EPI_ISL_3872732 | 2021-09-02      |
| hCoV-19/Japan/PG-79424/2021 | EPI_ISL_3872733 | 2021-09-02      |
| hCoV-19/Japan/PG-79425/2021 | EPI_ISL_3872734 | 2021-09-02      |

| virus_name                  | epiID           | submission_date |
|-----------------------------|-----------------|-----------------|
| hCoV-19/Japan/PG-79426/2021 | EPI_ISL_3872735 | 2021-09-02      |
| hCoV-19/Japan/PG-79427/2021 | EPI_ISL_3872736 | 2021-09-02      |
| hCoV-19/Japan/PG-79428/2021 | EPI_ISL_3872737 | 2021-09-02      |
| hCoV-19/Japan/PG-79429/2021 | EPI_ISL_3872738 | 2021-09-02      |
| hCoV-19/Japan/PG-79430/2021 | EPI_ISL_3872739 | 2021-09-02      |
| hCoV-19/Japan/PG-79431/2021 | EPI_ISL_3872740 | 2021-09-02      |
| hCoV-19/Japan/PG-79432/2021 | EPI_ISL_3872741 | 2021-09-02      |
| hCoV-19/Japan/PG-79433/2021 | EPI_ISL_3872742 | 2021-09-02      |
| hCoV-19/Japan/PG-79434/2021 | EPI_ISL_3872743 | 2021-09-02      |
| hCoV-19/Japan/PG-79435/2021 | EPI_ISL_3872744 | 2021-09-02      |
| hCoV-19/Japan/PG-79436/2021 | EPI_ISL_3872745 | 2021-09-02      |
| hCoV-19/Japan/PG-79437/2021 | EPI_ISL_3872746 | 2021-09-02      |
| hCoV-19/Japan/PG-79438/2021 | EPI_ISL_3872747 | 2021-09-02      |
| hCoV-19/Japan/PG-79439/2021 | EPI_ISL_3872748 | 2021-09-02      |
| hCoV-19/Japan/PG-79440/2021 | EPI_ISL_3872749 | 2021-09-02      |
| hCoV-19/Japan/PG-79441/2021 | EPI_ISL_3872750 | 2021-09-02      |
| hCoV-19/Japan/PG-79442/2021 | EPI_ISL_3872751 | 2021-09-02      |
| hCoV-19/Japan/PG-79443/2021 | EPI_ISL_3872752 | 2021-09-02      |
| hCoV-19/Japan/PG-79444/2021 | EPI_ISL_3872753 | 2021-09-02      |
| hCoV-19/Japan/PG-79445/2021 | EPI_ISL_3872754 | 2021-09-02      |
| hCoV-19/Japan/PG-79446/2021 | EPI_ISL_3872755 | 2021-09-02      |
| hCoV-19/Japan/PG-79447/2021 | EPI_ISL_3872756 | 2021-09-02      |
| hCoV-19/Japan/PG-79448/2021 | EPI_ISL_3872757 | 2021-09-02      |
| hCoV-19/Japan/PG-79449/2021 | EPI_ISL_3872758 | 2021-09-02      |
| hCoV-19/Japan/PG-79450/2021 | EPI_ISL_3872759 | 2021-09-02      |
| hCoV-19/Japan/PG-79451/2021 | EPI_ISL_3872760 | 2021-09-02      |
| hCoV-19/Japan/PG-79452/2021 | EPI_ISL_3872761 | 2021-09-02      |
| hCoV-19/Japan/PG-79453/2021 | EPI_ISL_3872762 | 2021-09-02      |
| hCoV-19/Japan/PG-79454/2021 | EPI_ISL_3872763 | 2021-09-02      |
| hCoV-19/Japan/PG-79455/2021 | EPI_ISL_3872764 | 2021-09-02      |
| hCoV-19/Japan/PG-79456/2021 | EPI_ISL_3872765 | 2021-09-02      |
| hCoV-19/Japan/PG-79457/2021 | EPI_ISL_3872766 | 2021-09-02      |
| hCoV-19/Japan/PG-79458/2021 | EPI_ISL_3872767 | 2021-09-02      |
| hCoV-19/Japan/PG-79459/2021 | EPI_ISL_3872768 | 2021-09-02      |
| hCoV-19/Japan/PG-79460/2021 | EPI_ISL_3872769 | 2021-09-02      |
| hCoV-19/Japan/PG-79461/2021 | EPI_ISL_3872770 | 2021-09-02      |
| hCoV-19/Japan/PG-79462/2021 | EPI_ISL_3872771 | 2021-09-02      |
| hCoV-19/Japan/PG-79463/2021 | EPI_ISL_3872772 | 2021-09-02      |
| hCoV-19/Japan/PG-79464/2021 | EPI_ISL_3872773 | 2021-09-02      |
| hCoV-19/Japan/PG-79465/2021 | EPI_ISL_3872774 | 2021-09-02      |
| hCoV-19/Japan/PG-79466/2021 | EPI_ISL_3871610 | 2021-09-02      |
| hCoV-19/Japan/PG-79467/2021 | EPI_ISL_3871611 | 2021-09-02      |
| hCoV-19/Japan/PG-79468/2021 | EPI_ISL_3871612 | 2021-09-02      |
| hCoV-19/Japan/PG-79469/2021 | EPI_ISL_3871613 | 2021-09-02      |
| hCoV-19/Japan/PG-79470/2021 | EPI_ISL_3871506 | 2021-09-02      |
| hCoV-19/Japan/PG-79471/2021 | EPI_ISL_3871507 | 2021-09-02      |
| hCoV-19/Japan/PG-79472/2021 | EPI_ISL_3871508 | 2021-09-02      |
| hCoV-19/Japan/PG-79473/2021 | EPI_ISL_3871509 | 2021-09-02      |
| hCoV-19/Japan/PG-79474/2021 | EPI_ISL_3871510 | 2021-09-02      |
| hCoV-19/Japan/PG-79475/2021 | EPI_ISL_3871511 | 2021-09-02      |
| hCoV-19/Japan/PG-79476/2021 | EPI_ISL_3871512 | 2021-09-02      |
| hCoV-19/Japan/PG-79477/2021 | EPI_ISL_3871513 | 2021-09-02      |
| hCoV-19/Japan/PG-79478/2021 | EPI_ISL_3871514 | 2021-09-02      |
| hCoV-19/Japan/PG-79479/2021 | EPI_ISL_3871515 | 2021-09-02      |

| virus_name                  | epiID           | submission_date |
|-----------------------------|-----------------|-----------------|
| hCoV-19/Japan/PG-79480/2021 | EPI_ISL_3871516 | 2021-09-02      |
| hCoV-19/Japan/PG-79481/2021 | EPI_ISL_3871517 | 2021-09-02      |
| hCoV-19/Japan/PG-79482/2021 | EPI_ISL_3871518 | 2021-09-02      |
| hCoV-19/Japan/PG-79483/2021 | EPI_ISL_3871519 | 2021-09-02      |
| hCoV-19/Japan/PG-79484/2021 | EPI_ISL_3871520 | 2021-09-02      |
| hCoV-19/Japan/PG-79485/2021 | EPI_ISL_3871521 | 2021-09-02      |
| hCoV-19/Japan/PG-79486/2021 | EPI_ISL_3871522 | 2021-09-02      |
| hCoV-19/Japan/PG-79487/2021 | EPI_ISL_3872516 | 2021-09-02      |
| hCoV-19/Japan/PG-79488/2021 | EPI_ISL_3872517 | 2021-09-02      |
| hCoV-19/Japan/PG-79489/2021 | EPI_ISL_3872518 | 2021-09-02      |
| hCoV-19/Japan/PG-79490/2021 | EPI_ISL_3874333 | 2021-09-02      |
| hCoV-19/Japan/PG-79491/2021 | EPI_ISL_3874334 | 2021-09-02      |
| hCoV-19/Japan/PG-79492/2021 | EPI_ISL_3874335 | 2021-09-02      |
| hCoV-19/Japan/PG-79493/2021 | EPI_ISL_3874336 | 2021-09-02      |
| hCoV-19/Japan/PG-79494/2021 | EPI_ISL_3874337 | 2021-09-02      |
| hCoV-19/Japan/PG-79495/2021 | EPI_ISL_3874338 | 2021-09-02      |
| hCoV-19/Japan/PG-79496/2021 | EPI_ISL_3874339 | 2021-09-02      |
| hCoV-19/Japan/PG-79497/2021 | EPI_ISL_3874340 | 2021-09-02      |
| hCoV-19/Japan/PG-79498/2021 | EPI_ISL_3874341 | 2021-09-02      |
| hCoV-19/Japan/PG-79499/2021 | EPI_ISL_3874342 | 2021-09-02      |
| hCoV-19/Japan/PG-79500/2021 | EPI_ISL_3874343 | 2021-09-02      |
| hCoV-19/Japan/PG-79501/2021 | EPI_ISL_3874344 | 2021-09-02      |
| hCoV-19/Japan/PG-79502/2021 | EPI_ISL_3874345 | 2021-09-02      |
| hCoV-19/Japan/PG-79503/2021 | EPI_ISL_3874346 | 2021-09-02      |
| hCoV-19/Japan/PG-79504/2021 | EPI_ISL_3874422 | 2021-09-02      |
| hCoV-19/Japan/PG-79505/2021 | EPI_ISL_3874423 | 2021-09-02      |
| hCoV-19/Japan/PG-79506/2021 | EPI_ISL_3874424 | 2021-09-02      |
| hCoV-19/Japan/PG-79507/2021 | EPI_ISL_3874425 | 2021-09-02      |
| hCoV-19/Japan/PG-79508/2021 | EPI_ISL_3874426 | 2021-09-02      |
| hCoV-19/Japan/PG-79509/2021 | EPI_ISL_3874427 | 2021-09-02      |
| hCoV-19/Japan/PG-79510/2021 | EPI_ISL_3874428 | 2021-09-02      |
| hCoV-19/Japan/PG-79511/2021 | EPI_ISL_3874429 | 2021-09-02      |
| hCoV-19/Japan/PG-79512/2021 | EPI_ISL_3874430 | 2021-09-02      |
| hCoV-19/Japan/PG-79513/2021 | EPI_ISL_3874431 | 2021-09-02      |
| hCoV-19/Japan/PG-79514/2021 | EPI_ISL_3874432 | 2021-09-02      |
| hCoV-19/Japan/PG-79515/2021 | EPI_ISL_3874433 | 2021-09-02      |
| hCoV-19/Japan/PG-79516/2021 | EPI_ISL_3874434 | 2021-09-02      |
| hCoV-19/Japan/PG-79517/2021 | EPI_ISL_3874435 | 2021-09-02      |
| hCoV-19/Japan/PG-79518/2021 | EPI_ISL_3874436 | 2021-09-02      |
| hCoV-19/Japan/PG-79519/2021 | EPI_ISL_3874437 | 2021-09-02      |
| hCoV-19/Japan/PG-79520/2021 | EPI_ISL_3874438 | 2021-09-02      |
| hCoV-19/Japan/PG-79521/2021 | EPI_ISL_3874568 | 2021-09-02      |
| hCoV-19/Japan/PG-79522/2021 | EPI_ISL_3872284 | 2021-09-02      |
| hCoV-19/Japan/PG-79523/2021 | EPI_ISL_3872285 | 2021-09-02      |
| hCoV-19/Japan/PG-79524/2021 | EPI_ISL_3872286 | 2021-09-02      |
| hCoV-19/Japan/PG-79525/2021 | EPI_ISL_3872287 | 2021-09-02      |
| hCoV-19/Japan/PG-79526/2021 | EPI_ISL_3872288 | 2021-09-02      |
| hCoV-19/Japan/PG-79527/2021 | EPI_ISL_3872289 | 2021-09-02      |
| hCoV-19/Japan/PG-79528/2021 | EPI_ISL_3872290 | 2021-09-02      |
| hCoV-19/Japan/PG-79529/2021 | EPI_ISL_3872291 | 2021-09-02      |
| hCoV-19/Japan/PG-79530/2021 | EPI_ISL_3872292 | 2021-09-02      |
| hCoV-19/Japan/PG-79531/2021 | EPI_ISL_3872293 | 2021-09-02      |
| hCoV-19/Japan/PG-79532/2021 | EPI_ISL_3872294 | 2021-09-02      |
| hCoV-19/Japan/PG-79533/2021 | EPI_ISL_3872295 | 2021-09-02      |

| virus_name                  | epiID           | submission_date |
|-----------------------------|-----------------|-----------------|
| hCoV-19/Japan/PG-79534/2021 | EPI_ISL_3872296 | 2021-09-02      |
| hCoV-19/Japan/PG-79535/2021 | EPI_ISL_3872297 | 2021-09-02      |
| hCoV-19/Japan/PG-79536/2021 | EPI_ISL_3891200 | 2021-09-02      |
| hCoV-19/Japan/PG-79538/2021 | EPI_ISL_3891203 | 2021-09-02      |
| hCoV-19/Japan/PG-79539/2021 | EPI_ISL_3891205 | 2021-09-02      |
| hCoV-19/Japan/PG-79540/2021 | EPI_ISL_3891208 | 2021-09-02      |
| hCoV-19/Japan/PG-79541/2021 | EPI_ISL_3891210 | 2021-09-02      |
| hCoV-19/Japan/PG-79542/2021 | EPI_ISL_3891212 | 2021-09-02      |
| hCoV-19/Japan/PG-79543/2021 | EPI_ISL_3891215 | 2021-09-02      |
| hCoV-19/Japan/PG-79544/2021 | EPI_ISL_3891218 | 2021-09-02      |
| hCoV-19/Japan/PG-79545/2021 | EPI_ISL_3891220 | 2021-09-02      |
| hCoV-19/Japan/PG-79546/2021 | EPI_ISL_3891223 | 2021-09-02      |
| hCoV-19/Japan/PG-79547/2021 | EPI_ISL_3891226 | 2021-09-02      |
| hCoV-19/Japan/PG-79548/2021 | EPI_ISL_3891227 | 2021-09-02      |
| hCoV-19/Japan/PG-79549/2021 | EPI_ISL_3891228 | 2021-09-02      |
| hCoV-19/Japan/PG-79550/2021 | EPI_ISL_3891231 | 2021-09-02      |
| hCoV-19/Japan/PG-79551/2021 | EPI_ISL_3891234 | 2021-09-02      |
| hCoV-19/Japan/PG-79552/2021 | EPI_ISL_3891235 | 2021-09-02      |
| hCoV-19/Japan/PG-79553/2021 | EPI_ISL_3891238 | 2021-09-02      |
| hCoV-19/Japan/PG-79554/2021 | EPI_ISL_3891241 | 2021-09-02      |
| hCoV-19/Japan/PG-79555/2021 | EPI_ISL_3891244 | 2021-09-02      |
| hCoV-19/Japan/PG-79556/2021 | EPI_ISL_3891247 | 2021-09-02      |
| hCoV-19/Japan/PG-79557/2021 | EPI_ISL_3891249 | 2021-09-02      |
| hCoV-19/Japan/PG-79558/2021 | EPI_ISL_3891252 | 2021-09-02      |
| hCoV-19/Japan/PG-79559/2021 | EPI_ISL_3891254 | 2021-09-02      |
| hCoV-19/Japan/PG-79560/2021 | EPI_ISL_3891257 | 2021-09-02      |
| hCoV-19/Japan/PG-79561/2021 | EPI_ISL_3891259 | 2021-09-02      |
| hCoV-19/Japan/PG-79562/2021 | EPI_ISL_3891263 | 2021-09-02      |
| hCoV-19/Japan/PG-79563/2021 | EPI_ISL_3891265 | 2021-09-02      |
| hCoV-19/Japan/PG-79564/2021 | EPI_ISL_3891268 | 2021-09-02      |
| hCoV-19/Japan/PG-79565/2021 | EPI_ISL_3891271 | 2021-09-02      |
| hCoV-19/Japan/PG-79566/2021 | EPI_ISL_3891273 | 2021-09-02      |
| hCoV-19/Japan/PG-79567/2021 | EPI_ISL_3891276 | 2021-09-02      |
| hCoV-19/Japan/PG-79568/2021 | EPI_ISL_3891278 | 2021-09-02      |
| hCoV-19/Japan/PG-79569/2021 | EPI_ISL_3891281 | 2021-09-02      |
| hCoV-19/Japan/PG-79570/2021 | EPI_ISL_3891283 | 2021-09-02      |
| hCoV-19/Japan/PG-79571/2021 | EPI_ISL_3891286 | 2021-09-02      |
| hCoV-19/Japan/PG-79572/2021 | EPI_ISL_3891289 | 2021-09-02      |
| hCoV-19/Japan/PG-79573/2021 | EPI_ISL_3891291 | 2021-09-02      |
| hCoV-19/Japan/PG-79574/2021 | EPI_ISL_3891293 | 2021-09-02      |
| hCoV-19/Japan/PG-79575/2021 | EPI_ISL_3891296 | 2021-09-02      |
| hCoV-19/Japan/PG-79576/2021 | EPI_ISL_3891297 | 2021-09-02      |
| hCoV-19/Japan/PG-79577/2021 | EPI_ISL_3891300 | 2021-09-02      |
| hCoV-19/Japan/PG-79578/2021 | EPI_ISL_3891302 | 2021-09-02      |
| hCoV-19/Japan/PG-79579/2021 | EPI_ISL_3891304 | 2021-09-02      |
| hCoV-19/Japan/PG-79580/2021 | EPI_ISL_3891306 | 2021-09-02      |
| hCoV-19/Japan/PG-79581/2021 | EPI_ISL_3891308 | 2021-09-02      |
| hCoV-19/Japan/PG-79582/2021 | EPI_ISL_3891310 | 2021-09-02      |
| hCoV-19/Japan/PG-79583/2021 | EPI_ISL_3891313 | 2021-09-02      |
| hCoV-19/Japan/PG-79584/2021 | EPI_ISL_3891316 | 2021-09-02      |
| hCoV-19/Japan/PG-79585/2021 | EPI_ISL_3891319 | 2021-09-02      |
| hCoV-19/Japan/PG-79586/2021 | EPI_ISL_3891322 | 2021-09-02      |
| hCoV-19/Japan/PG-79587/2021 | EPI_ISL_3891325 | 2021-09-02      |
| hCoV-19/Japan/PG-79588/2021 | EPI_ISL_3891328 | 2021-09-02      |

| virus_name                  | epiID           | submission_date |
|-----------------------------|-----------------|-----------------|
| hCoV-19/Japan/PG-79589/2021 | EPI_ISL_3891331 | 2021-09-02      |
| hCoV-19/Japan/PG-79590/2021 | EPI_ISL_3891334 | 2021-09-02      |
| hCoV-19/Japan/PG-79591/2021 | EPI_ISL_3891335 | 2021-09-02      |
| hCoV-19/Japan/PG-79592/2021 | EPI_ISL_3891337 | 2021-09-02      |
| hCoV-19/Japan/PG-79593/2021 | EPI_ISL_3891340 | 2021-09-02      |
| hCoV-19/Japan/PG-79594/2021 | EPI_ISL_3891342 | 2021-09-02      |
| hCoV-19/Japan/PG-79595/2021 | EPI_ISL_3891345 | 2021-09-02      |
| hCoV-19/Japan/PG-79596/2021 | EPI_ISL_3891348 | 2021-09-02      |
| hCoV-19/Japan/PG-79597/2021 | EPI_ISL_3891350 | 2021-09-02      |
| hCoV-19/Japan/PG-79598/2021 | EPI_ISL_3891353 | 2021-09-02      |
| hCoV-19/Japan/PG-79599/2021 | EPI_ISL_3891356 | 2021-09-02      |
| hCoV-19/Japan/PG-79600/2021 | EPI_ISL_3891359 | 2021-09-02      |
| hCoV-19/Japan/PG-79601/2021 | EPI_ISL_3891362 | 2021-09-02      |
| hCoV-19/Japan/PG-79602/2021 | EPI_ISL_3891365 | 2021-09-02      |
| hCoV-19/Japan/PG-79603/2021 | EPI_ISL_3891367 | 2021-09-02      |
| hCoV-19/Japan/PG-79604/2021 | EPI_ISL_3891370 | 2021-09-02      |
| hCoV-19/Japan/PG-79605/2021 | EPI_ISL_3891372 | 2021-09-02      |
| hCoV-19/Japan/PG-79606/2021 | EPI_ISL_3891374 | 2021-09-02      |
| hCoV-19/Japan/PG-79607/2021 | EPI_ISL_3891377 | 2021-09-02      |
| hCoV-19/Japan/PG-79608/2021 | EPI_ISL_3891380 | 2021-09-02      |
| hCoV-19/Japan/PG-79609/2021 | EPI_ISL_3891383 | 2021-09-02      |
| hCoV-19/Japan/PG-79610/2021 | EPI_ISL_3891384 | 2021-09-02      |
| hCoV-19/Japan/PG-79611/2021 | EPI_ISL_3891385 | 2021-09-02      |
| hCoV-19/Japan/PG-79612/2021 | EPI_ISL_3891387 | 2021-09-02      |
| hCoV-19/Japan/PG-79613/2021 | EPI_ISL_3891390 | 2021-09-02      |
| hCoV-19/Japan/PG-79614/2021 | EPI_ISL_3891392 | 2021-09-02      |
| hCoV-19/Japan/PG-79615/2021 | EPI_ISL_3891395 | 2021-09-02      |
| hCoV-19/Japan/PG-79616/2021 | EPI_ISL_3891396 | 2021-09-02      |
| hCoV-19/Japan/PG-79617/2021 | EPI_ISL_3891397 | 2021-09-02      |
| hCoV-19/Japan/PG-79618/2021 | EPI_ISL_3891400 | 2021-09-02      |
| hCoV-19/Japan/PG-79619/2021 | EPI_ISL_3891403 | 2021-09-02      |
| hCoV-19/Japan/PG-79620/2021 | EPI_ISL_3891406 | 2021-09-02      |
| hCoV-19/Japan/PG-79621/2021 | EPI_ISL_3891408 | 2021-09-02      |
| hCoV-19/Japan/PG-79622/2021 | EPI_ISL_3891409 | 2021-09-02      |
| hCoV-19/Japan/PG-79623/2021 | EPI_ISL_3891412 | 2021-09-02      |
| hCoV-19/Japan/PG-79624/2021 | EPI_ISL_3891414 | 2021-09-02      |
| hCoV-19/Japan/PG-79625/2021 | EPI_ISL_3891416 | 2021-09-02      |
| hCoV-19/Japan/PG-79626/2021 | EPI_ISL_3891418 | 2021-09-02      |
| hCoV-19/Japan/PG-79627/2021 | EPI_ISL_3891421 | 2021-09-02      |
| hCoV-19/Japan/PG-79628/2021 | EPI_ISL_3891422 | 2021-09-02      |
| hCoV-19/Japan/PG-79629/2021 | EPI_ISL_3891425 | 2021-09-02      |
| hCoV-19/Japan/PG-79630/2021 | EPI_ISL_3891427 | 2021-09-02      |
| hCoV-19/Japan/PG-79631/2021 | EPI_ISL_3891429 | 2021-09-02      |
| hCoV-19/Japan/PG-79632/2021 | EPI_ISL_3891432 | 2021-09-02      |
| hCoV-19/Japan/PG-79633/2021 | EPI_ISL_3891435 | 2021-09-02      |
| hCoV-19/Japan/PG-79634/2021 | EPI_ISL_3891439 | 2021-09-02      |
| hCoV-19/Japan/PG-79635/2021 | EPI_ISL_3891441 | 2021-09-02      |
| hCoV-19/Japan/PG-79636/2021 | EPI_ISL_3891444 | 2021-09-02      |
| hCoV-19/Japan/PG-79637/2021 | EPI_ISL_3891447 | 2021-09-02      |
| hCoV-19/Japan/PG-79638/2021 | EPI_ISL_3891450 | 2021-09-02      |
| hCoV-19/Japan/PG-79639/2021 | EPI_ISL_3891453 | 2021-09-02      |
| hCoV-19/Japan/PG-79640/2021 | EPI_ISL_3891454 | 2021-09-02      |
| hCoV-19/Japan/PG-79641/2021 | EPI_ISL_3891456 | 2021-09-02      |
| hCoV-19/Japan/PG-79642/2021 | EPI_ISL_3891459 | 2021-09-02      |

| virus_name                  | epiID           | submission_date |
|-----------------------------|-----------------|-----------------|
| hCoV-19/Japan/PG-79643/2021 | EPI_ISL_3891461 | 2021-09-02      |
| hCoV-19/Japan/PG-79644/2021 | EPI_ISL_3891464 | 2021-09-02      |
| hCoV-19/Japan/PG-79645/2021 | EPI_ISL_3891466 | 2021-09-02      |
| hCoV-19/Japan/PG-79646/2021 | EPI_ISL_3891467 | 2021-09-02      |
| hCoV-19/Japan/PG-79647/2021 | EPI_ISL_3891470 | 2021-09-02      |
| hCoV-19/Japan/PG-79648/2021 | EPI_ISL_3891472 | 2021-09-02      |
| hCoV-19/Japan/PG-79649/2021 | EPI_ISL_3891474 | 2021-09-02      |
| hCoV-19/Japan/PG-79650/2021 | EPI_ISL_3891477 | 2021-09-02      |
| hCoV-19/Japan/PG-79651/2021 | EPI_ISL_3891480 | 2021-09-02      |
| hCoV-19/Japan/PG-79652/2021 | EPI_ISL_3891482 | 2021-09-02      |
| hCoV-19/Japan/PG-79653/2021 | EPI_ISL_3891485 | 2021-09-02      |
| hCoV-19/Japan/PG-79654/2021 | EPI_ISL_3891488 | 2021-09-02      |
| hCoV-19/Japan/PG-79655/2021 | EPI_ISL_3891490 | 2021-09-02      |
| hCoV-19/Japan/PG-79656/2021 | EPI_ISL_3891493 | 2021-09-02      |
| hCoV-19/Japan/PG-79657/2021 | EPI_ISL_3891496 | 2021-09-02      |
| hCoV-19/Japan/PG-79658/2021 | EPI_ISL_3891498 | 2021-09-02      |
| hCoV-19/Japan/PG-79659/2021 | EPI_ISL_3891501 | 2021-09-02      |
| hCoV-19/Japan/PG-79660/2021 | EPI_ISL_3891503 | 2021-09-02      |
| hCoV-19/Japan/PG-79661/2021 | EPI_ISL_3891505 | 2021-09-02      |
| hCoV-19/Japan/PG-79662/2021 | EPI_ISL_3891508 | 2021-09-02      |
| hCoV-19/Japan/PG-79663/2021 | EPI_ISL_3891510 | 2021-09-02      |
| hCoV-19/Japan/PG-79664/2021 | EPI_ISL_3891513 | 2021-09-02      |
| hCoV-19/Japan/PG-79665/2021 | EPI_ISL_3891515 | 2021-09-02      |
| hCoV-19/Japan/PG-79666/2021 | EPI_ISL_3891518 | 2021-09-02      |
| hCoV-19/Japan/PG-79667/2021 | EPI_ISL_3891521 | 2021-09-02      |
| hCoV-19/Japan/PG-79668/2021 | EPI_ISL_3891522 | 2021-09-02      |
| hCoV-19/Japan/PG-79669/2021 | EPI_ISL_3891525 | 2021-09-02      |
| hCoV-19/Japan/PG-79670/2021 | EPI_ISL_3891528 | 2021-09-02      |
| hCoV-19/Japan/PG-79671/2021 | EPI_ISL_3891531 | 2021-09-02      |
| hCoV-19/Japan/PG-79672/2021 | EPI_ISL_3891538 | 2021-09-02      |
| hCoV-19/Japan/PG-79673/2021 | EPI_ISL_3891541 | 2021-09-02      |
| hCoV-19/Japan/PG-79674/2021 | EPI_ISL_3891544 | 2021-09-02      |
| hCoV-19/Japan/PG-79675/2021 | EPI_ISL_3891546 | 2021-09-02      |
| hCoV-19/Japan/PG-79676/2021 | EPI_ISL_3891547 | 2021-09-02      |
| hCoV-19/Japan/PG-79677/2021 | EPI_ISL_3891549 | 2021-09-02      |
| hCoV-19/Japan/PG-79678/2021 | EPI_ISL_3891552 | 2021-09-02      |
| hCoV-19/Japan/PG-79679/2021 | EPI_ISL_3891554 | 2021-09-02      |
| hCoV-19/Japan/PG-79680/2021 | EPI_ISL_3891556 | 2021-09-02      |
| hCoV-19/Japan/PG-79681/2021 | EPI_ISL_3891558 | 2021-09-02      |
| hCoV-19/Japan/PG-79682/2021 | EPI_ISL_3891561 | 2021-09-02      |
| hCoV-19/Japan/PG-79683/2021 | EPI_ISL_3891563 | 2021-09-02      |
| hCoV-19/Japan/PG-79684/2021 | EPI_ISL_3891565 | 2021-09-02      |
| hCoV-19/Japan/PG-79685/2021 | EPI_ISL_3891568 | 2021-09-02      |
| hCoV-19/Japan/PG-79686/2021 | EPI_ISL_3891571 | 2021-09-02      |
| hCoV-19/Japan/PG-79687/2021 | EPI_ISL_3891573 | 2021-09-02      |
| hCoV-19/Japan/PG-79688/2021 | EPI_ISL_3891576 | 2021-09-02      |
| hCoV-19/Japan/PG-79689/2021 | EPI_ISL_3891577 | 2021-09-02      |
| hCoV-19/Japan/PG-79690/2021 | EPI_ISL_3891578 | 2021-09-02      |
| hCoV-19/Japan/PG-79691/2021 | EPI_ISL_3891581 | 2021-09-02      |
| hCoV-19/Japan/PG-79692/2021 | EPI_ISL_3891583 | 2021-09-02      |
| hCoV-19/Japan/PG-79693/2021 | EPI_ISL_3891586 | 2021-09-02      |
| hCoV-19/Japan/PG-79694/2021 | EPI_ISL_3891588 | 2021-09-02      |
| hCoV-19/Japan/PG-79695/2021 | EPI_ISL_3891591 | 2021-09-02      |
| hCoV-19/Japan/PG-79696/2021 | EPI_ISL_3891594 | 2021-09-02      |

| virus_name                  | epiID           | submission_date |
|-----------------------------|-----------------|-----------------|
| hCoV-19/Japan/PG-79697/2021 | EPI_ISL_3891596 | 2021-09-02      |
| hCoV-19/Japan/PG-79698/2021 | EPI_ISL_3891599 | 2021-09-02      |
| hCoV-19/Japan/PG-79699/2021 | EPI_ISL_3891602 | 2021-09-02      |
| hCoV-19/Japan/PG-79700/2021 | EPI_ISL_3891604 | 2021-09-02      |
| hCoV-19/Japan/PG-79701/2021 | EPI_ISL_3891607 | 2021-09-02      |
| hCoV-19/Japan/PG-79702/2021 | EPI_ISL_3891610 | 2021-09-02      |
| hCoV-19/Japan/PG-79703/2021 | EPI_ISL_3891612 | 2021-09-02      |
| hCoV-19/Japan/PG-79704/2021 | EPI_ISL_3891615 | 2021-09-02      |
| hCoV-19/Japan/PG-79705/2021 | EPI_ISL_3891617 | 2021-09-02      |
| hCoV-19/Japan/PG-79706/2021 | EPI_ISL_3891618 | 2021-09-02      |
| hCoV-19/Japan/PG-79707/2021 | EPI_ISL_3891619 | 2021-09-02      |
| hCoV-19/Japan/PG-79708/2021 | EPI_ISL_3891621 | 2021-09-02      |
| hCoV-19/Japan/PG-79709/2021 | EPI_ISL_3891623 | 2021-09-02      |
| hCoV-19/Japan/PG-79710/2021 | EPI_ISL_3891626 | 2021-09-02      |
| hCoV-19/Japan/PG-79711/2021 | EPI_ISL_3891628 | 2021-09-02      |
| hCoV-19/Japan/PG-79712/2021 | EPI_ISL_3891630 | 2021-09-02      |
| hCoV-19/Japan/PG-79713/2021 | EPI_ISL_3891632 | 2021-09-02      |
| hCoV-19/Japan/PG-79714/2021 | EPI_ISL_3891636 | 2021-09-02      |
| hCoV-19/Japan/PG-79715/2021 | EPI_ISL_3891638 | 2021-09-02      |
| hCoV-19/Japan/PG-79716/2021 | EPI_ISL_3891641 | 2021-09-02      |
| hCoV-19/Japan/PG-79717/2021 | EPI_ISL_3891644 | 2021-09-02      |
| hCoV-19/Japan/PG-79718/2021 | EPI_ISL_3891647 | 2021-09-02      |
| hCoV-19/Japan/PG-79719/2021 | EPI_ISL_3891650 | 2021-09-02      |
| hCoV-19/Japan/PG-79720/2021 | EPI_ISL_3891653 | 2021-09-02      |
| hCoV-19/Japan/PG-79721/2021 | EPI_ISL_3891655 | 2021-09-02      |
| hCoV-19/Japan/PG-79722/2021 | EPI_ISL_3891658 | 2021-09-02      |
| hCoV-19/Japan/PG-79723/2021 | EPI_ISL_3891661 | 2021-09-02      |
| hCoV-19/Japan/PG-79724/2021 | EPI_ISL_3891662 | 2021-09-02      |
| hCoV-19/Japan/PG-79725/2021 | EPI_ISL_3891664 | 2021-09-02      |
| hCoV-19/Japan/PG-79726/2021 | EPI_ISL_3891666 | 2021-09-02      |
| hCoV-19/Japan/PG-79727/2021 | EPI_ISL_3891668 | 2021-09-02      |
| hCoV-19/Japan/PG-79728/2021 | EPI_ISL_3891670 | 2021-09-02      |
| hCoV-19/Japan/PG-79729/2021 | EPI_ISL_3891673 | 2021-09-02      |
| hCoV-19/Japan/PG-79730/2021 | EPI_ISL_3891675 | 2021-09-02      |
| hCoV-19/Japan/PG-79731/2021 | EPI_ISL_3891678 | 2021-09-02      |
| hCoV-19/Japan/PG-79732/2021 | EPI_ISL_3891680 | 2021-09-02      |
| hCoV-19/Japan/PG-79733/2021 | EPI_ISL_3891682 | 2021-09-02      |
| hCoV-19/Japan/PG-79734/2021 | EPI_ISL_3891685 | 2021-09-02      |
| hCoV-19/Japan/PG-79735/2021 | EPI_ISL_3891687 | 2021-09-02      |
| hCoV-19/Japan/PG-79736/2021 | EPI_ISL_3891690 | 2021-09-02      |
| hCoV-19/Japan/PG-79737/2021 | EPI_ISL_3891692 | 2021-09-02      |
| hCoV-19/Japan/PG-79738/2021 | EPI_ISL_3891694 | 2021-09-02      |
| hCoV-19/Japan/PG-79739/2021 | EPI_ISL_3891696 | 2021-09-02      |
| hCoV-19/Japan/PG-79740/2021 | EPI_ISL_3891698 | 2021-09-02      |
| hCoV-19/Japan/PG-79741/2021 | EPI_ISL_3891700 | 2021-09-02      |
| hCoV-19/Japan/PG-79742/2021 | EPI_ISL_3891703 | 2021-09-02      |
| hCoV-19/Japan/PG-79743/2021 | EPI_ISL_3891707 | 2021-09-02      |
| hCoV-19/Japan/PG-79744/2021 | EPI_ISL_3891710 | 2021-09-02      |
| hCoV-19/Japan/PG-79745/2021 | EPI_ISL_3891713 | 2021-09-02      |
| hCoV-19/Japan/PG-79746/2021 | EPI_ISL_3891716 | 2021-09-02      |
| hCoV-19/Japan/PG-79747/2021 | EPI_ISL_3891719 | 2021-09-02      |
| hCoV-19/Japan/PG-79748/2021 | EPI_ISL_3891722 | 2021-09-02      |
| hCoV-19/Japan/PG-79749/2021 | EPI_ISL_3891724 | 2021-09-02      |
| hCoV-19/Japan/PG-79750/2021 | EPI_ISL_3891727 | 2021-09-02      |

| virus_name                  | epiID           | submission_date |
|-----------------------------|-----------------|-----------------|
| hCoV-19/Japan/PG-79751/2021 | EPI_ISL_3891730 | 2021-09-02      |
| hCoV-19/Japan/PG-79752/2021 | EPI_ISL_3891733 | 2021-09-02      |
| hCoV-19/Japan/PG-79753/2021 | EPI_ISL_3891737 | 2021-09-02      |
| hCoV-19/Japan/PG-79754/2021 | EPI_ISL_3891740 | 2021-09-02      |
| hCoV-19/Japan/PG-79755/2021 | EPI_ISL_3891742 | 2021-09-02      |
| hCoV-19/Japan/PG-79756/2021 | EPI_ISL_3891746 | 2021-09-02      |
| hCoV-19/Japan/PG-79757/2021 | EPI_ISL_3891748 | 2021-09-02      |
| hCoV-19/Japan/PG-79758/2021 | EPI_ISL_3891751 | 2021-09-02      |
| hCoV-19/Japan/PG-79759/2021 | EPI_ISL_3891752 | 2021-09-02      |
| hCoV-19/Japan/PG-79760/2021 | EPI_ISL_3891754 | 2021-09-02      |
| hCoV-19/Japan/PG-79761/2021 | EPI_ISL_3891757 | 2021-09-02      |
| hCoV-19/Japan/PG-79762/2021 | EPI_ISL_3891760 | 2021-09-02      |
| hCoV-19/Japan/PG-79763/2021 | EPI_ISL_3891763 | 2021-09-02      |
| hCoV-19/Japan/PG-79764/2021 | EPI_ISL_3891766 | 2021-09-02      |
| hCoV-19/Japan/PG-79765/2021 | EPI_ISL_3891769 | 2021-09-02      |
| hCoV-19/Japan/PG-79766/2021 | EPI_ISL_3891771 | 2021-09-02      |
| hCoV-19/Japan/PG-79767/2021 | EPI_ISL_3891774 | 2021-09-02      |
| hCoV-19/Japan/PG-79768/2021 | EPI_ISL_3891776 | 2021-09-02      |
| hCoV-19/Japan/PG-79769/2021 | EPI_ISL_3891777 | 2021-09-02      |
| hCoV-19/Japan/PG-79770/2021 | EPI_ISL_3891780 | 2021-09-02      |
| hCoV-19/Japan/PG-79771/2021 | EPI_ISL_3891783 | 2021-09-02      |
| hCoV-19/Japan/PG-79772/2021 | EPI_ISL_3891786 | 2021-09-02      |
| hCoV-19/Japan/PG-79773/2021 | EPI_ISL_3891788 | 2021-09-02      |
| hCoV-19/Japan/PG-79774/2021 | EPI_ISL_3891791 | 2021-09-02      |
| hCoV-19/Japan/PG-79775/2021 | EPI_ISL_3891795 | 2021-09-02      |
| hCoV-19/Japan/PG-79776/2021 | EPI_ISL_3891797 | 2021-09-02      |
| hCoV-19/Japan/PG-79777/2021 | EPI_ISL_3891800 | 2021-09-02      |
| hCoV-19/Japan/PG-79778/2021 | EPI_ISL_3891803 | 2021-09-02      |
| hCoV-19/Japan/PG-79779/2021 | EPI_ISL_3891805 | 2021-09-02      |
| hCoV-19/Japan/PG-79780/2021 | EPI_ISL_3891807 | 2021-09-02      |
| hCoV-19/Japan/PG-79781/2021 | EPI_ISL_3891808 | 2021-09-02      |
| hCoV-19/Japan/PG-79782/2021 | EPI_ISL_3891809 | 2021-09-02      |
| hCoV-19/Japan/PG-79783/2021 | EPI_ISL_3891812 | 2021-09-02      |
| hCoV-19/Japan/PG-79784/2021 | EPI_ISL_3891814 | 2021-09-02      |
| hCoV-19/Japan/PG-79785/2021 | EPI_ISL_3891816 | 2021-09-02      |
| hCoV-19/Japan/PG-79786/2021 | EPI_ISL_3891820 | 2021-09-02      |
| hCoV-19/Japan/PG-79787/2021 | EPI_ISL_3891821 | 2021-09-02      |
| hCoV-19/Japan/PG-79788/2021 | EPI_ISL_3891823 | 2021-09-02      |
| hCoV-19/Japan/PG-79789/2021 | EPI_ISL_3891826 | 2021-09-02      |
| hCoV-19/Japan/PG-79790/2021 | EPI_ISL_3891828 | 2021-09-02      |
| hCoV-19/Japan/PG-79791/2021 | EPI_ISL_3891831 | 2021-09-02      |
| hCoV-19/Japan/PG-79792/2021 | EPI_ISL_3891833 | 2021-09-02      |
| hCoV-19/Japan/PG-79793/2021 | EPI_ISL_3891836 | 2021-09-02      |
| hCoV-19/Japan/PG-79794/2021 | EPI_ISL_3891838 | 2021-09-02      |
| hCoV-19/Japan/PG-79795/2021 | EPI_ISL_3891841 | 2021-09-02      |
| hCoV-19/Japan/PG-79796/2021 | EPI_ISL_3891842 | 2021-09-02      |
| hCoV-19/Japan/PG-79797/2021 | EPI_ISL_3891844 | 2021-09-02      |
| hCoV-19/Japan/PG-79798/2021 | EPI_ISL_3891847 | 2021-09-02      |
| hCoV-19/Japan/PG-79799/2021 | EPI_ISL_3891850 | 2021-09-02      |
| hCoV-19/Japan/PG-79800/2021 | EPI_ISL_3891852 | 2021-09-02      |
| hCoV-19/Japan/PG-79801/2021 | EPI_ISL_3891854 | 2021-09-02      |
| hCoV-19/Japan/PG-79802/2021 | EPI_ISL_3891856 | 2021-09-02      |
| hCoV-19/Japan/PG-79803/2021 | EPI_ISL_3891859 | 2021-09-02      |
| hCoV-19/Japan/PG-79804/2021 | EPI_ISL_3891862 | 2021-09-02      |



| virus_name                  | epiID           | submission_date |
|-----------------------------|-----------------|-----------------|
| hCoV-19/Japan/PG-79805/2021 | EPI_ISL_3891864 | 2021-09-02      |
| hCoV-19/Japan/PG-79806/2021 | EPI_ISL_3891867 | 2021-09-02      |
| hCoV-19/Japan/PG-79807/2021 | EPI_ISL_3891870 | 2021-09-02      |
| hCoV-19/Japan/PG-79808/2021 | EPI_ISL_3891872 | 2021-09-02      |
| hCoV-19/Japan/PG-79809/2021 | EPI_ISL_3891874 | 2021-09-02      |
| hCoV-19/Japan/PG-79810/2021 | EPI_ISL_3891876 | 2021-09-02      |
| hCoV-19/Japan/PG-79811/2021 | EPI_ISL_3891879 | 2021-09-02      |
| hCoV-19/Japan/PG-79812/2021 | EPI_ISL_3891881 | 2021-09-02      |
| hCoV-19/Japan/PG-79813/2021 | EPI_ISL_3891884 | 2021-09-02      |
| hCoV-19/Japan/PG-79814/2021 | EPI_ISL_3891886 | 2021-09-02      |
| hCoV-19/Japan/PG-79815/2021 | EPI_ISL_3891889 | 2021-09-02      |
| hCoV-19/Japan/PG-79816/2021 | EPI_ISL_3891892 | 2021-09-02      |
| hCoV-19/Japan/PG-79817/2021 | EPI_ISL_3891894 | 2021-09-02      |
| hCoV-19/Japan/PG-79818/2021 | EPI_ISL_3891898 | 2021-09-02      |
| hCoV-19/Japan/PG-79819/2021 | EPI_ISL_3891901 | 2021-09-02      |
| hCoV-19/Japan/PG-79820/2021 | EPI_ISL_3891904 | 2021-09-02      |
| hCoV-19/Japan/PG-79821/2021 | EPI_ISL_3891906 | 2021-09-02      |
| hCoV-19/Japan/PG-79822/2021 | EPI_ISL_3891909 | 2021-09-02      |
| hCoV-19/Japan/PG-79823/2021 | EPI_ISL_3891912 | 2021-09-02      |
| hCoV-19/Japan/PG-79824/2021 | EPI_ISL_3891915 | 2021-09-02      |
| hCoV-19/Japan/PG-79825/2021 | EPI_ISL_3891917 | 2021-09-02      |
| hCoV-19/Japan/PG-79826/2021 | EPI_ISL_3891920 | 2021-09-02      |
| hCoV-19/Japan/PG-79827/2021 | EPI_ISL_3891923 | 2021-09-02      |
| hCoV-19/Japan/PG-79828/2021 | EPI_ISL_3891926 | 2021-09-02      |
| hCoV-19/Japan/PG-79829/2021 | EPI_ISL_3891928 | 2021-09-02      |
| hCoV-19/Japan/PG-79830/2021 | EPI_ISL_3891931 | 2021-09-02      |
| hCoV-19/Japan/PG-79831/2021 | EPI_ISL_3891934 | 2021-09-02      |
| hCoV-19/Japan/PG-79832/2021 | EPI_ISL_3891937 | 2021-09-02      |
| hCoV-19/Japan/PG-79833/2021 | EPI_ISL_3891939 | 2021-09-02      |
| hCoV-19/Japan/PG-79834/2021 | EPI_ISL_3891941 | 2021-09-02      |
| hCoV-19/Japan/PG-79835/2021 | EPI_ISL_3891943 | 2021-09-02      |
| hCoV-19/Japan/PG-79836/2021 | EPI_ISL_3891946 | 2021-09-02      |
| hCoV-19/Japan/PG-79837/2021 | EPI_ISL_3891949 | 2021-09-02      |
| hCoV-19/Japan/PG-79838/2021 | EPI_ISL_3891951 | 2021-09-02      |
| hCoV-19/Japan/PG-79839/2021 | EPI_ISL_3891954 | 2021-09-02      |
| hCoV-19/Japan/PG-79840/2021 | EPI_ISL_3891957 | 2021-09-02      |
| hCoV-19/Japan/PG-79841/2021 | EPI_ISL_3891960 | 2021-09-02      |
| hCoV-19/Japan/PG-79842/2021 | EPI_ISL_3891962 | 2021-09-02      |
| hCoV-19/Japan/PG-79843/2021 | EPI_ISL_3891965 | 2021-09-02      |
| hCoV-19/Japan/PG-79844/2021 | EPI_ISL_3891967 | 2021-09-02      |
| hCoV-19/Japan/PG-79845/2021 | EPI_ISL_3891969 | 2021-09-02      |
| hCoV-19/Japan/PG-79846/2021 | EPI_ISL_3891971 | 2021-09-02      |
| hCoV-19/Japan/PG-79847/2021 | EPI_ISL_3891973 | 2021-09-02      |
| hCoV-19/Japan/PG-79848/2021 | EPI_ISL_3891976 | 2021-09-02      |
| hCoV-19/Japan/PG-79849/2021 | EPI_ISL_3891978 | 2021-09-02      |
| hCoV-19/Japan/PG-79850/2021 | EPI_ISL_3891980 | 2021-09-02      |
| hCoV-19/Japan/PG-79851/2021 | EPI_ISL_3891982 | 2021-09-02      |
| hCoV-19/Japan/PG-79852/2021 | EPI_ISL_3891984 | 2021-09-02      |
| hCoV-19/Japan/PG-79853/2021 | EPI_ISL_3891986 | 2021-09-02      |
| hCoV-19/Japan/PG-79854/2021 | EPI_ISL_3891988 | 2021-09-02      |
| hCoV-19/Japan/PG-79855/2021 | EPI_ISL_3891989 | 2021-09-02      |
| hCoV-19/Japan/PG-79856/2021 | EPI_ISL_3891991 | 2021-09-02      |
| hCoV-19/Japan/PG-79857/2021 | EPI_ISL_3891993 | 2021-09-02      |
| hCoV-19/Japan/PG-79858/2021 | EPI_ISL_3891995 | 2021-09-02      |

| virus_name                  | epiID           | submission_date |
|-----------------------------|-----------------|-----------------|
| hCoV-19/Japan/PG-79859/2021 | EPI_ISL_3891998 | 2021-09-02      |
| hCoV-19/Japan/PG-79860/2021 | EPI_ISL_3892000 | 2021-09-02      |
| hCoV-19/Japan/PG-79861/2021 | EPI_ISL_3892003 | 2021-09-02      |
| hCoV-19/Japan/PG-79862/2021 | EPI_ISL_3892005 | 2021-09-02      |
| hCoV-19/Japan/PG-79863/2021 | EPI_ISL_3892007 | 2021-09-02      |
| hCoV-19/Japan/PG-79864/2021 | EPI_ISL_3892010 | 2021-09-02      |
| hCoV-19/Japan/PG-79865/2021 | EPI_ISL_3892013 | 2021-09-02      |
| hCoV-19/Japan/PG-79866/2021 | EPI_ISL_3892015 | 2021-09-02      |
| hCoV-19/Japan/PG-79867/2021 | EPI_ISL_3892017 | 2021-09-02      |
| hCoV-19/Japan/PG-79868/2021 | EPI_ISL_3892019 | 2021-09-02      |
| hCoV-19/Japan/PG-79869/2021 | EPI_ISL_3892021 | 2021-09-02      |
| hCoV-19/Japan/PG-79870/2021 | EPI_ISL_3892024 | 2021-09-02      |
| hCoV-19/Japan/PG-79871/2021 | EPI_ISL_3892027 | 2021-09-02      |
| hCoV-19/Japan/PG-79872/2021 | EPI_ISL_3892029 | 2021-09-02      |
| hCoV-19/Japan/PG-79873/2021 | EPI_ISL_3892032 | 2021-09-02      |
| hCoV-19/Japan/PG-79874/2021 | EPI_ISL_3892034 | 2021-09-02      |
| hCoV-19/Japan/PG-79875/2021 | EPI_ISL_3892036 | 2021-09-02      |
| hCoV-19/Japan/PG-79876/2021 | EPI_ISL_3892038 | 2021-09-02      |
| hCoV-19/Japan/PG-79877/2021 | EPI_ISL_3892040 | 2021-09-02      |
| hCoV-19/Japan/PG-79878/2021 | EPI_ISL_3892042 | 2021-09-02      |
| hCoV-19/Japan/PG-79879/2021 | EPI_ISL_3892047 | 2021-09-02      |
| hCoV-19/Japan/PG-79880/2021 | EPI_ISL_3892050 | 2021-09-02      |
| hCoV-19/Japan/PG-79881/2021 | EPI_ISL_3892054 | 2021-09-02      |
| hCoV-19/Japan/PG-79882/2021 | EPI_ISL_3892059 | 2021-09-02      |
| hCoV-19/Japan/PG-79883/2021 | EPI_ISL_3892064 | 2021-09-02      |
| hCoV-19/Japan/PG-79884/2021 | EPI_ISL_3892068 | 2021-09-02      |
| hCoV-19/Japan/PG-79885/2021 | EPI_ISL_3892072 | 2021-09-02      |
| hCoV-19/Japan/PG-79886/2021 | EPI_ISL_3892074 | 2021-09-02      |
| hCoV-19/Japan/PG-79887/2021 | EPI_ISL_3892077 | 2021-09-02      |
| hCoV-19/Japan/PG-79888/2021 | EPI_ISL_3892080 | 2021-09-02      |
| hCoV-19/Japan/PG-79889/2021 | EPI_ISL_3892082 | 2021-09-02      |
| hCoV-19/Japan/PG-79890/2021 | EPI_ISL_3892087 | 2021-09-02      |
| hCoV-19/Japan/PG-79891/2021 | EPI_ISL_3892091 | 2021-09-02      |
| hCoV-19/Japan/PG-79892/2021 | EPI_ISL_3892096 | 2021-09-02      |
| hCoV-19/Japan/PG-79893/2021 | EPI_ISL_3892099 | 2021-09-02      |
| hCoV-19/Japan/PG-79894/2021 | EPI_ISL_3892103 | 2021-09-02      |
| hCoV-19/Japan/PG-79895/2021 | EPI_ISL_3892105 | 2021-09-02      |
| hCoV-19/Japan/PG-79896/2021 | EPI_ISL_3892110 | 2021-09-02      |
| hCoV-19/Japan/PG-79897/2021 | EPI_ISL_3892114 | 2021-09-02      |
| hCoV-19/Japan/PG-79898/2021 | EPI_ISL_3892117 | 2021-09-02      |
| hCoV-19/Japan/PG-79899/2021 | EPI_ISL_3892118 | 2021-09-02      |
| hCoV-19/Japan/PG-79900/2021 | EPI_ISL_3892122 | 2021-09-02      |
| hCoV-19/Japan/PG-79901/2021 | EPI_ISL_3892125 | 2021-09-02      |
| hCoV-19/Japan/PG-79902/2021 | EPI_ISL_3892128 | 2021-09-02      |
| hCoV-19/Japan/PG-79903/2021 | EPI_ISL_3892131 | 2021-09-02      |
| hCoV-19/Japan/PG-79904/2021 | EPI_ISL_3892133 | 2021-09-02      |
| hCoV-19/Japan/PG-79905/2021 | EPI_ISL_3892137 | 2021-09-02      |
| hCoV-19/Japan/PG-79906/2021 | EPI_ISL_3892143 | 2021-09-02      |
| hCoV-19/Japan/PG-79907/2021 | EPI_ISL_3892147 | 2021-09-02      |
| hCoV-19/Japan/PG-79908/2021 | EPI_ISL_3892152 | 2021-09-02      |
| hCoV-19/Japan/PG-79909/2021 | EPI_ISL_3892156 | 2021-09-02      |
| hCoV-19/Japan/PG-79910/2021 | EPI_ISL_3892159 | 2021-09-02      |
| hCoV-19/Japan/PG-79911/2021 | EPI_ISL_3892164 | 2021-09-02      |
| hCoV-19/Japan/PG-79912/2021 | EPI_ISL_3892169 | 2021-09-02      |

| virus_name                  | epiID           | submission_date |
|-----------------------------|-----------------|-----------------|
| hCoV-19/Japan/PG-79913/2021 | EPI_ISL_3892174 | 2021-09-02      |
| hCoV-19/Japan/PG-79914/2021 | EPI_ISL_3892179 | 2021-09-02      |
| hCoV-19/Japan/PG-79915/2021 | EPI_ISL_3873769 | 2021-09-02      |
| hCoV-19/Japan/PG-79916/2021 | EPI_ISL_3873770 | 2021-09-02      |
| hCoV-19/Japan/PG-79917/2021 | EPI_ISL_3873771 | 2021-09-02      |
| hCoV-19/Japan/PG-79918/2021 | EPI_ISL_3873772 | 2021-09-02      |
| hCoV-19/Japan/PG-79919/2021 | EPI_ISL_3873773 | 2021-09-02      |
| hCoV-19/Japan/PG-79920/2021 | EPI_ISL_3873774 | 2021-09-02      |
| hCoV-19/Japan/PG-79921/2021 | EPI_ISL_3873775 | 2021-09-02      |
| hCoV-19/Japan/PG-79922/2021 | EPI_ISL_3873776 | 2021-09-02      |
| hCoV-19/Japan/PG-79923/2021 | EPI_ISL_3873777 | 2021-09-02      |
| hCoV-19/Japan/PG-79924/2021 | EPI_ISL_3873778 | 2021-09-02      |
| hCoV-19/Japan/PG-79925/2021 | EPI_ISL_3873779 | 2021-09-02      |
| hCoV-19/Japan/PG-79926/2021 | EPI_ISL_3873780 | 2021-09-02      |
| hCoV-19/Japan/PG-79927/2021 | EPI_ISL_3873781 | 2021-09-02      |
| hCoV-19/Japan/PG-79928/2021 | EPI_ISL_3873782 | 2021-09-02      |
| hCoV-19/Japan/PG-79929/2021 | EPI_ISL_3873783 | 2021-09-02      |
| hCoV-19/Japan/PG-79930/2021 | EPI_ISL_3873784 | 2021-09-02      |
| hCoV-19/Japan/PG-79931/2021 | EPI_ISL_3873785 | 2021-09-02      |
| hCoV-19/Japan/PG-79932/2021 | EPI_ISL_3873786 | 2021-09-02      |
| hCoV-19/Japan/PG-79933/2021 | EPI_ISL_3873787 | 2021-09-02      |
| hCoV-19/Japan/PG-79934/2021 | EPI_ISL_3873788 | 2021-09-02      |
| hCoV-19/Japan/PG-79935/2021 | EPI_ISL_3873789 | 2021-09-02      |
| hCoV-19/Japan/PG-79936/2021 | EPI_ISL_3873790 | 2021-09-02      |
| hCoV-19/Japan/PG-79937/2021 | EPI_ISL_3873791 | 2021-09-02      |
| hCoV-19/Japan/PG-79938/2021 | EPI_ISL_3873792 | 2021-09-02      |
| hCoV-19/Japan/PG-79939/2021 | EPI_ISL_3873793 | 2021-09-02      |
| hCoV-19/Japan/PG-79940/2021 | EPI_ISL_3873794 | 2021-09-02      |
| hCoV-19/Japan/PG-79941/2021 | EPI_ISL_3873795 | 2021-09-02      |
| hCoV-19/Japan/PG-79942/2021 | EPI_ISL_3873796 | 2021-09-02      |
| hCoV-19/Japan/PG-79943/2021 | EPI_ISL_3873797 | 2021-09-02      |
| hCoV-19/Japan/PG-79944/2021 | EPI_ISL_3873798 | 2021-09-02      |
| hCoV-19/Japan/PG-79945/2021 | EPI_ISL_3874627 | 2021-09-02      |
| hCoV-19/Japan/PG-79946/2021 | EPI_ISL_3874630 | 2021-09-02      |
| hCoV-19/Japan/PG-79947/2021 | EPI_ISL_3874631 | 2021-09-02      |
| hCoV-19/Japan/PG-79948/2021 | EPI_ISL_3874634 | 2021-09-02      |
| hCoV-19/Japan/PG-79949/2021 | EPI_ISL_3874637 | 2021-09-02      |
| hCoV-19/Japan/PG-79950/2021 | EPI_ISL_3874640 | 2021-09-02      |
| hCoV-19/Japan/PG-79951/2021 | EPI_ISL_3874643 | 2021-09-02      |
| hCoV-19/Japan/PG-79952/2021 | EPI_ISL_3874645 | 2021-09-02      |
| hCoV-19/Japan/PG-79953/2021 | EPI_ISL_3874648 | 2021-09-02      |
| hCoV-19/Japan/PG-79954/2021 | EPI_ISL_3874651 | 2021-09-02      |
| hCoV-19/Japan/PG-79955/2021 | EPI_ISL_3874653 | 2021-09-02      |
| hCoV-19/Japan/PG-79956/2021 | EPI_ISL_3874657 | 2021-09-02      |
| hCoV-19/Japan/PG-79957/2021 | EPI_ISL_3874660 | 2021-09-02      |
| hCoV-19/Japan/PG-79958/2021 | EPI_ISL_3874662 | 2021-09-02      |
| hCoV-19/Japan/PG-79959/2021 | EPI_ISL_3874665 | 2021-09-02      |
| hCoV-19/Japan/PG-79960/2021 | EPI_ISL_3874668 | 2021-09-02      |
| hCoV-19/Japan/PG-79961/2021 | EPI_ISL_3874670 | 2021-09-02      |
| hCoV-19/Japan/PG-79962/2021 | EPI_ISL_3874673 | 2021-09-02      |
| hCoV-19/Japan/PG-79963/2021 | EPI_ISL_3874676 | 2021-09-02      |
| hCoV-19/Japan/PG-79964/2021 | EPI_ISL_3874679 | 2021-09-02      |
| hCoV-19/Japan/PG-79965/2021 | EPI_ISL_3874974 | 2021-09-02      |
| hCoV-19/Japan/PG-79966/2021 | EPI_ISL_3874975 | 2021-09-02      |

| virus_name                  | epiID           | submission_date |
|-----------------------------|-----------------|-----------------|
| hCoV-19/Japan/PG-79967/2021 | EPI_ISL_3874976 | 2021-09-02      |
| hCoV-19/Japan/PG-79968/2021 | EPI_ISL_3874977 | 2021-09-02      |
| hCoV-19/Japan/PG-79969/2021 | EPI_ISL_3874978 | 2021-09-02      |
| hCoV-19/Japan/PG-79973/2021 | EPI_ISL_3874979 | 2021-09-02      |
| hCoV-19/Japan/PG-79974/2021 | EPI_ISL_3874980 | 2021-09-02      |
| hCoV-19/Japan/PG-79975/2021 | EPI_ISL_3874981 | 2021-09-02      |
| hCoV-19/Japan/PG-79976/2021 | EPI_ISL_3874982 | 2021-09-02      |
| hCoV-19/Japan/PG-79978/2021 | EPI_ISL_3874983 | 2021-09-02      |
| hCoV-19/Japan/PG-79981/2021 | EPI_ISL_3874984 | 2021-09-02      |
| hCoV-19/Japan/PG-79982/2021 | EPI_ISL_3874985 | 2021-09-02      |
| hCoV-19/Japan/PG-79983/2021 | EPI_ISL_3874986 | 2021-09-02      |
| hCoV-19/Japan/PG-79984/2021 | EPI_ISL_3874987 | 2021-09-02      |
| hCoV-19/Japan/PG-79985/2021 | EPI_ISL_3874988 | 2021-09-02      |
| hCoV-19/Japan/PG-79986/2021 | EPI_ISL_3874989 | 2021-09-02      |
| hCoV-19/Japan/PG-79987/2021 | EPI_ISL_3874990 | 2021-09-02      |
| hCoV-19/Japan/PG-79988/2021 | EPI_ISL_3874991 | 2021-09-02      |
| hCoV-19/Japan/PG-79990/2021 | EPI_ISL_3874992 | 2021-09-02      |
| hCoV-19/Japan/PG-79991/2021 | EPI_ISL_3874993 | 2021-09-02      |
| hCoV-19/Japan/PG-79992/2021 | EPI_ISL_3874994 | 2021-09-02      |
| hCoV-19/Japan/PG-79993/2021 | EPI_ISL_3874995 | 2021-09-02      |
| hCoV-19/Japan/PG-79994/2021 | EPI_ISL_3874996 | 2021-09-02      |
| hCoV-19/Japan/PG-79995/2021 | EPI_ISL_3874997 | 2021-09-02      |
| hCoV-19/Japan/PG-79996/2021 | EPI_ISL_3874998 | 2021-09-02      |
| hCoV-19/Japan/PG-79997/2021 | EPI_ISL_3874999 | 2021-09-02      |
| hCoV-19/Japan/PG-79998/2021 | EPI_ISL_3875000 | 2021-09-02      |
| hCoV-19/Japan/PG-79999/2021 | EPI_ISL_3875001 | 2021-09-02      |
| hCoV-19/Japan/PG-80000/2021 | EPI_ISL_3875002 | 2021-09-02      |
| hCoV-19/Japan/PG-80001/2021 | EPI_ISL_3875003 | 2021-09-02      |
| hCoV-19/Japan/PG-80002/2021 | EPI_ISL_3875004 | 2021-09-02      |
| hCoV-19/Japan/PG-80003/2021 | EPI_ISL_3875005 | 2021-09-02      |
| hCoV-19/Japan/PG-80004/2021 | EPI_ISL_3875006 | 2021-09-02      |
| hCoV-19/Japan/PG-80005/2021 | EPI_ISL_3875007 | 2021-09-02      |
| hCoV-19/Japan/PG-80006/2021 | EPI_ISL_3875008 | 2021-09-02      |
| hCoV-19/Japan/PG-80008/2021 | EPI_ISL_3875009 | 2021-09-02      |
| hCoV-19/Japan/PG-80010/2021 | EPI_ISL_3875010 | 2021-09-02      |
| hCoV-19/Japan/PG-80011/2021 | EPI_ISL_3875011 | 2021-09-02      |
| hCoV-19/Japan/PG-80012/2021 | EPI_ISL_3875012 | 2021-09-02      |
| hCoV-19/Japan/PG-80013/2021 | EPI_ISL_3875013 | 2021-09-02      |
| hCoV-19/Japan/PG-80017/2021 | EPI_ISL_3875014 | 2021-09-02      |
| hCoV-19/Japan/PG-80018/2021 | EPI_ISL_3875015 | 2021-09-02      |
| hCoV-19/Japan/PG-80019/2021 | EPI_ISL_3875016 | 2021-09-02      |
| hCoV-19/Japan/PG-80020/2021 | EPI_ISL_3875017 | 2021-09-02      |
| hCoV-19/Japan/PG-80021/2021 | EPI_ISL_3875018 | 2021-09-02      |
| hCoV-19/Japan/PG-80022/2021 | EPI_ISL_3875019 | 2021-09-02      |
| hCoV-19/Japan/PG-80023/2021 | EPI_ISL_3875020 | 2021-09-02      |
| hCoV-19/Japan/PG-80024/2021 | EPI_ISL_3875021 | 2021-09-02      |
| hCoV-19/Japan/PG-80025/2021 | EPI_ISL_3875022 | 2021-09-02      |
| hCoV-19/Japan/PG-80026/2021 | EPI_ISL_3875023 | 2021-09-02      |
| hCoV-19/Japan/PG-80027/2021 | EPI_ISL_3875024 | 2021-09-02      |
| hCoV-19/Japan/PG-80028/2021 | EPI_ISL_3875025 | 2021-09-02      |
| hCoV-19/Japan/PG-80029/2021 | EPI_ISL_3875026 | 2021-09-02      |
| hCoV-19/Japan/PG-80030/2021 | EPI_ISL_3875027 | 2021-09-02      |
| hCoV-19/Japan/PG-80032/2021 | EPI_ISL_3875028 | 2021-09-02      |
| hCoV-19/Japan/PG-80033/2021 | EPI_ISL_3875029 | 2021-09-02      |

| virus_name                  | epiID           | submission_date |
|-----------------------------|-----------------|-----------------|
| hCoV-19/Japan/PG-80034/2021 | EPI_ISL_3875030 | 2021-09-02      |
| hCoV-19/Japan/PG-80035/2021 | EPI_ISL_3875031 | 2021-09-02      |
| hCoV-19/Japan/PG-80036/2021 | EPI_ISL_3875032 | 2021-09-02      |
| hCoV-19/Japan/PG-80037/2021 | EPI_ISL_3875033 | 2021-09-02      |
| hCoV-19/Japan/PG-80038/2021 | EPI_ISL_3875034 | 2021-09-02      |
| hCoV-19/Japan/PG-80039/2021 | EPI_ISL_3875035 | 2021-09-02      |
| hCoV-19/Japan/PG-80040/2021 | EPI_ISL_3875036 | 2021-09-02      |
| hCoV-19/Japan/PG-80041/2021 | EPI_ISL_3875037 | 2021-09-02      |
| hCoV-19/Japan/PG-80043/2021 | EPI_ISL_3875038 | 2021-09-02      |
| hCoV-19/Japan/PG-80046/2021 | EPI_ISL_3875039 | 2021-09-02      |
| hCoV-19/Japan/PG-80047/2021 | EPI_ISL_3875040 | 2021-09-02      |
| hCoV-19/Japan/PG-80048/2021 | EPI_ISL_3875041 | 2021-09-02      |
| hCoV-19/Japan/PG-80049/2021 | EPI_ISL_3875042 | 2021-09-02      |
| hCoV-19/Japan/PG-80050/2021 | EPI_ISL_3875043 | 2021-09-02      |
| hCoV-19/Japan/PG-80051/2021 | EPI_ISL_3875044 | 2021-09-02      |
| hCoV-19/Japan/PG-80052/2021 | EPI_ISL_3875045 | 2021-09-02      |
| hCoV-19/Japan/PG-80053/2021 | EPI_ISL_3875046 | 2021-09-02      |
| hCoV-19/Japan/PG-80054/2021 | EPI_ISL_3875047 | 2021-09-02      |
| hCoV-19/Japan/PG-80055/2021 | EPI_ISL_3875048 | 2021-09-02      |
| hCoV-19/Japan/PG-80065/2021 | EPI_ISL_3875049 | 2021-09-02      |
| hCoV-19/Japan/PG-80067/2021 | EPI_ISL_3875050 | 2021-09-02      |
| hCoV-19/Japan/PG-80068/2021 | EPI_ISL_3875051 | 2021-09-02      |
| hCoV-19/Japan/PG-80069/2021 | EPI_ISL_3875052 | 2021-09-02      |
| hCoV-19/Japan/PG-80071/2021 | EPI_ISL_3875053 | 2021-09-02      |
| hCoV-19/Japan/PG-80072/2021 | EPI_ISL_3875054 | 2021-09-02      |
| hCoV-19/Japan/PG-80073/2021 | EPI_ISL_3875055 | 2021-09-02      |
| hCoV-19/Japan/PG-80076/2021 | EPI_ISL_3875056 | 2021-09-02      |
| hCoV-19/Japan/PG-80077/2021 | EPI_ISL_3875057 | 2021-09-02      |
| hCoV-19/Japan/PG-80078/2021 | EPI_ISL_3875058 | 2021-09-02      |
| hCoV-19/Japan/PG-80080/2021 | EPI_ISL_3875059 | 2021-09-02      |
| hCoV-19/Japan/PG-80081/2021 | EPI_ISL_3875060 | 2021-09-02      |
| hCoV-19/Japan/PG-80082/2021 | EPI_ISL_3875061 | 2021-09-02      |
| hCoV-19/Japan/PG-80083/2021 | EPI_ISL_3875062 | 2021-09-02      |
| hCoV-19/Japan/PG-80086/2021 | EPI_ISL_3875063 | 2021-09-02      |
| hCoV-19/Japan/PG-80087/2021 | EPI_ISL_3875064 | 2021-09-02      |
| hCoV-19/Japan/PG-80088/2021 | EPI_ISL_3875065 | 2021-09-02      |
| hCoV-19/Japan/PG-80089/2021 | EPI_ISL_3875066 | 2021-09-02      |
| hCoV-19/Japan/PG-80090/2021 | EPI_ISL_3875067 | 2021-09-02      |
| hCoV-19/Japan/PG-80093/2021 | EPI_ISL_3875068 | 2021-09-02      |
| hCoV-19/Japan/PG-80094/2021 | EPI_ISL_3875069 | 2021-09-02      |
| hCoV-19/Japan/PG-80095/2021 | EPI_ISL_3875070 | 2021-09-02      |
| hCoV-19/Japan/PG-80096/2021 | EPI_ISL_3875071 | 2021-09-02      |
| hCoV-19/Japan/PG-80097/2021 | EPI_ISL_3875072 | 2021-09-02      |
| hCoV-19/Japan/PG-80098/2021 | EPI_ISL_3875073 | 2021-09-02      |
| hCoV-19/Japan/PG-80099/2021 | EPI_ISL_3875074 | 2021-09-02      |
| hCoV-19/Japan/PG-80100/2021 | EPI_ISL_3875075 | 2021-09-02      |
| hCoV-19/Japan/PG-80101/2021 | EPI_ISL_3875076 | 2021-09-02      |
| hCoV-19/Japan/PG-80102/2021 | EPI_ISL_3875077 | 2021-09-02      |
| hCoV-19/Japan/PG-80103/2021 | EPI_ISL_3875078 | 2021-09-02      |
| hCoV-19/Japan/PG-80104/2021 | EPI_ISL_3875079 | 2021-09-02      |
| hCoV-19/Japan/PG-80105/2021 | EPI_ISL_3875080 | 2021-09-02      |
| hCoV-19/Japan/PG-80106/2021 | EPI_ISL_3875081 | 2021-09-02      |
| hCoV-19/Japan/PG-80107/2021 | EPI_ISL_3875082 | 2021-09-02      |
| hCoV-19/Japan/PG-80108/2021 | EPI_ISL_3875083 | 2021-09-02      |

| virus_name                  | epiID           | submission_date |
|-----------------------------|-----------------|-----------------|
| hCoV-19/Japan/PG-80109/2021 | EPI_ISL_3875084 | 2021-09-02      |
| hCoV-19/Japan/PG-80111/2021 | EPI_ISL_3875085 | 2021-09-02      |
| hCoV-19/Japan/PG-80112/2021 | EPI_ISL_3875086 | 2021-09-02      |
| hCoV-19/Japan/PG-80113/2021 | EPI_ISL_3875087 | 2021-09-02      |
| hCoV-19/Japan/PG-80115/2021 | EPI_ISL_3875088 | 2021-09-02      |
| hCoV-19/Japan/PG-80116/2021 | EPI_ISL_3875089 | 2021-09-02      |
| hCoV-19/Japan/PG-80118/2021 | EPI_ISL_3875090 | 2021-09-02      |
| hCoV-19/Japan/PG-80119/2021 | EPI_ISL_3875091 | 2021-09-02      |
| hCoV-19/Japan/PG-80121/2021 | EPI_ISL_3875092 | 2021-09-02      |
| hCoV-19/Japan/PG-80122/2021 | EPI_ISL_3875093 | 2021-09-02      |
| hCoV-19/Japan/PG-80123/2021 | EPI_ISL_3875094 | 2021-09-02      |
| hCoV-19/Japan/PG-80125/2021 | EPI_ISL_3875095 | 2021-09-02      |
| hCoV-19/Japan/PG-80126/2021 | EPI_ISL_3875096 | 2021-09-02      |
| hCoV-19/Japan/PG-80127/2021 | EPI_ISL_3875097 | 2021-09-02      |
| hCoV-19/Japan/PG-80128/2021 | EPI_ISL_3875098 | 2021-09-02      |
| hCoV-19/Japan/PG-80129/2021 | EPI_ISL_3875099 | 2021-09-02      |
| hCoV-19/Japan/PG-80130/2021 | EPI_ISL_3875100 | 2021-09-02      |
| hCoV-19/Japan/PG-80131/2021 | EPI_ISL_3875101 | 2021-09-02      |
| hCoV-19/Japan/PG-80132/2021 | EPI_ISL_3875102 | 2021-09-02      |
| hCoV-19/Japan/PG-80133/2021 | EPI_ISL_3875103 | 2021-09-02      |
| hCoV-19/Japan/PG-80134/2021 | EPI_ISL_3875104 | 2021-09-02      |
| hCoV-19/Japan/PG-80135/2021 | EPI_ISL_3875105 | 2021-09-02      |
| hCoV-19/Japan/PG-80136/2021 | EPI_ISL_3875106 | 2021-09-02      |
| hCoV-19/Japan/PG-80137/2021 | EPI_ISL_3875107 | 2021-09-02      |
| hCoV-19/Japan/PG-80138/2021 | EPI_ISL_3871798 | 2021-09-02      |
| hCoV-19/Japan/PG-80139/2021 | EPI_ISL_3871799 | 2021-09-02      |
| hCoV-19/Japan/PG-80140/2021 | EPI_ISL_3871800 | 2021-09-02      |
| hCoV-19/Japan/PG-80141/2021 | EPI_ISL_3871801 | 2021-09-02      |
| hCoV-19/Japan/PG-80142/2021 | EPI_ISL_3871802 | 2021-09-02      |
| hCoV-19/Japan/PG-80143/2021 | EPI_ISL_3871803 | 2021-09-02      |
| hCoV-19/Japan/PG-80144/2021 | EPI_ISL_3871804 | 2021-09-02      |
| hCoV-19/Japan/PG-80145/2021 | EPI_ISL_3871805 | 2021-09-02      |
| hCoV-19/Japan/PG-80146/2021 | EPI_ISL_3871806 | 2021-09-02      |
| hCoV-19/Japan/PG-80147/2021 | EPI_ISL_3871807 | 2021-09-02      |
| hCoV-19/Japan/PG-80148/2021 | EPI_ISL_3871808 | 2021-09-02      |
| hCoV-19/Japan/PG-80149/2021 | EPI_ISL_3871809 | 2021-09-02      |
| hCoV-19/Japan/PG-80150/2021 | EPI_ISL_3871810 | 2021-09-02      |
| hCoV-19/Japan/PG-80151/2021 | EPI_ISL_3871811 | 2021-09-02      |
| hCoV-19/Japan/PG-80152/2021 | EPI_ISL_3871812 | 2021-09-02      |
| hCoV-19/Japan/PG-80153/2021 | EPI_ISL_3871813 | 2021-09-02      |
| hCoV-19/Japan/PG-80154/2021 | EPI_ISL_3871814 | 2021-09-02      |
| hCoV-19/Japan/PG-80155/2021 | EPI_ISL_3871815 | 2021-09-02      |
| hCoV-19/Japan/PG-80156/2021 | EPI_ISL_3871816 | 2021-09-02      |
| hCoV-19/Japan/PG-80157/2021 | EPI_ISL_3871817 | 2021-09-02      |
| hCoV-19/Japan/PG-80158/2021 | EPI_ISL_3871818 | 2021-09-02      |
| hCoV-19/Japan/PG-80159/2021 | EPI_ISL_3871819 | 2021-09-02      |
| hCoV-19/Japan/PG-80160/2021 | EPI_ISL_3871820 | 2021-09-02      |
| hCoV-19/Japan/PG-80161/2021 | EPI_ISL_3871821 | 2021-09-02      |
| hCoV-19/Japan/PG-80162/2021 | EPI_ISL_3871822 | 2021-09-02      |
| hCoV-19/Japan/PG-80163/2021 | EPI_ISL_3876104 | 2021-09-02      |
| hCoV-19/Japan/PG-80164/2021 | EPI_ISL_3876105 | 2021-09-02      |
| hCoV-19/Japan/PG-80165/2021 | EPI_ISL_3876106 | 2021-09-02      |
| hCoV-19/Japan/PG-80166/2021 | EPI_ISL_3876107 | 2021-09-02      |
| hCoV-19/Japan/PG-80167/2021 | EPI_ISL_3876108 | 2021-09-02      |

| virus_name                  | epiID           | submission_date |
|-----------------------------|-----------------|-----------------|
| hCoV-19/Japan/PG-80168/2021 | EPI_ISL_3876109 | 2021-09-02      |
| hCoV-19/Japan/PG-80169/2021 | EPI_ISL_3876110 | 2021-09-02      |
| hCoV-19/Japan/PG-80170/2021 | EPI_ISL_3876111 | 2021-09-02      |
| hCoV-19/Japan/PG-80171/2021 | EPI_ISL_3876112 | 2021-09-02      |
| hCoV-19/Japan/PG-80172/2021 | EPI_ISL_3876113 | 2021-09-02      |
| hCoV-19/Japan/PG-80173/2021 | EPI_ISL_3876114 | 2021-09-02      |
| hCoV-19/Japan/PG-80174/2021 | EPI_ISL_3876115 | 2021-09-02      |
| hCoV-19/Japan/PG-80175/2021 | EPI_ISL_3876116 | 2021-09-02      |
| hCoV-19/Japan/PG-80176/2021 | EPI_ISL_3876117 | 2021-09-02      |
| hCoV-19/Japan/PG-80177/2021 | EPI_ISL_3876118 | 2021-09-02      |
| hCoV-19/Japan/PG-80178/2021 | EPI_ISL_3876119 | 2021-09-02      |
| hCoV-19/Japan/PG-80179/2021 | EPI_ISL_3876120 | 2021-09-02      |
| hCoV-19/Japan/PG-80180/2021 | EPI_ISL_3876121 | 2021-09-02      |
| hCoV-19/Japan/PG-80181/2021 | EPI_ISL_3876122 | 2021-09-02      |
| hCoV-19/Japan/PG-80182/2021 | EPI_ISL_3876123 | 2021-09-02      |
| hCoV-19/Japan/PG-80183/2021 | EPI_ISL_3876124 | 2021-09-02      |
| hCoV-19/Japan/PG-80184/2021 | EPI_ISL_3876125 | 2021-09-02      |
| hCoV-19/Japan/PG-80185/2021 | EPI_ISL_3876126 | 2021-09-02      |
| hCoV-19/Japan/PG-80186/2021 | EPI_ISL_3876127 | 2021-09-02      |
| hCoV-19/Japan/PG-80187/2021 | EPI_ISL_3876128 | 2021-09-02      |
| hCoV-19/Japan/PG-80188/2021 | EPI_ISL_3876129 | 2021-09-02      |
| hCoV-19/Japan/PG-80189/2021 | EPI_ISL_3876130 | 2021-09-02      |
| hCoV-19/Japan/PG-80190/2021 | EPI_ISL_3876131 | 2021-09-02      |
| hCoV-19/Japan/PG-80191/2021 | EPI_ISL_3876132 | 2021-09-02      |
| hCoV-19/Japan/PG-80192/2021 | EPI_ISL_3876133 | 2021-09-02      |
| hCoV-19/Japan/PG-80193/2021 | EPI_ISL_3876134 | 2021-09-02      |
| hCoV-19/Japan/PG-80194/2021 | EPI_ISL_3876135 | 2021-09-02      |
| hCoV-19/Japan/PG-80195/2021 | EPI_ISL_3876136 | 2021-09-02      |
| hCoV-19/Japan/PG-80196/2021 | EPI_ISL_3876137 | 2021-09-02      |
| hCoV-19/Japan/PG-80197/2021 | EPI_ISL_3876138 | 2021-09-02      |
| hCoV-19/Japan/PG-80198/2021 | EPI_ISL_3876139 | 2021-09-02      |
| hCoV-19/Japan/PG-80199/2021 | EPI_ISL_3876140 | 2021-09-02      |
| hCoV-19/Japan/PG-80200/2021 | EPI_ISL_3876141 | 2021-09-02      |
| hCoV-19/Japan/PG-80201/2021 | EPI_ISL_3876142 | 2021-09-02      |
| hCoV-19/Japan/PG-80202/2021 | EPI_ISL_3876143 | 2021-09-02      |
| hCoV-19/Japan/PG-80203/2021 | EPI_ISL_3876144 | 2021-09-02      |
| hCoV-19/Japan/PG-80204/2021 | EPI_ISL_3876145 | 2021-09-02      |
| hCoV-19/Japan/PG-80205/2021 | EPI_ISL_3876146 | 2021-09-02      |
| hCoV-19/Japan/PG-80206/2021 | EPI_ISL_3876147 | 2021-09-02      |
| hCoV-19/Japan/PG-80207/2021 | EPI_ISL_3876148 | 2021-09-02      |
| hCoV-19/Japan/PG-80208/2021 | EPI_ISL_3876149 | 2021-09-02      |
| hCoV-19/Japan/PG-80209/2021 | EPI_ISL_3876150 | 2021-09-02      |
| hCoV-19/Japan/PG-80210/2021 | EPI_ISL_3876151 | 2021-09-02      |
| hCoV-19/Japan/PG-80211/2021 | EPI_ISL_3876152 | 2021-09-02      |
| hCoV-19/Japan/PG-80212/2021 | EPI_ISL_3876153 | 2021-09-02      |
| hCoV-19/Japan/PG-80213/2021 | EPI_ISL_3876154 | 2021-09-02      |
| hCoV-19/Japan/PG-80214/2021 | EPI_ISL_3876155 | 2021-09-02      |
| hCoV-19/Japan/PG-80215/2021 | EPI_ISL_3876156 | 2021-09-02      |
| hCoV-19/Japan/PG-80216/2021 | EPI_ISL_3876157 | 2021-09-02      |
| hCoV-19/Japan/PG-80217/2021 | EPI_ISL_3876158 | 2021-09-02      |
| hCoV-19/Japan/PG-80218/2021 | EPI_ISL_3876159 | 2021-09-02      |
| hCoV-19/Japan/PG-80219/2021 | EPI_ISL_3876160 | 2021-09-02      |
| hCoV-19/Japan/PG-80220/2021 | EPI_ISL_3876161 | 2021-09-02      |
| hCoV-19/Japan/PG-80221/2021 | EPI_ISL_3876162 | 2021-09-02      |

| virus_name                  | epiID           | submission_date |
|-----------------------------|-----------------|-----------------|
| hCoV-19/Japan/PG-80222/2021 | EPI_ISL_3876163 | 2021-09-02      |
| hCoV-19/Japan/PG-80223/2021 | EPI_ISL_3876164 | 2021-09-02      |
| hCoV-19/Japan/PG-80224/2021 | EPI_ISL_3876165 | 2021-09-02      |
| hCoV-19/Japan/PG-80225/2021 | EPI_ISL_3876166 | 2021-09-02      |
| hCoV-19/Japan/PG-80226/2021 | EPI_ISL_3876167 | 2021-09-02      |
| hCoV-19/Japan/PG-80227/2021 | EPI_ISL_3875867 | 2021-09-02      |
| hCoV-19/Japan/PG-80228/2021 | EPI_ISL_3875868 | 2021-09-02      |
| hCoV-19/Japan/PG-80229/2021 | EPI_ISL_3875869 | 2021-09-02      |
| hCoV-19/Japan/PG-80230/2021 | EPI_ISL_3875870 | 2021-09-02      |
| hCoV-19/Japan/PG-80231/2021 | EPI_ISL_3875871 | 2021-09-02      |
| hCoV-19/Japan/PG-80232/2021 | EPI_ISL_3875872 | 2021-09-02      |
| hCoV-19/Japan/PG-80233/2021 | EPI_ISL_3875873 | 2021-09-02      |
| hCoV-19/Japan/PG-80234/2021 | EPI_ISL_3875874 | 2021-09-02      |
| hCoV-19/Japan/PG-80235/2021 | EPI_ISL_3875875 | 2021-09-02      |
| hCoV-19/Japan/PG-80236/2021 | EPI_ISL_3875876 | 2021-09-02      |
| hCoV-19/Japan/PG-80237/2021 | EPI_ISL_3875877 | 2021-09-02      |
| hCoV-19/Japan/PG-80238/2021 | EPI_ISL_3875878 | 2021-09-02      |
| hCoV-19/Japan/PG-80239/2021 | EPI_ISL_3875879 | 2021-09-02      |
| hCoV-19/Japan/PG-80240/2021 | EPI_ISL_3875880 | 2021-09-02      |
| hCoV-19/Japan/PG-80241/2021 | EPI_ISL_3875881 | 2021-09-02      |
| hCoV-19/Japan/PG-80242/2021 | EPI_ISL_3875882 | 2021-09-02      |
| hCoV-19/Japan/PG-80243/2021 | EPI_ISL_3870710 | 2021-09-02      |
| hCoV-19/Japan/PG-80244/2021 | EPI_ISL_3870711 | 2021-09-02      |
| hCoV-19/Japan/PG-80245/2021 | EPI_ISL_3870712 | 2021-09-02      |
| hCoV-19/Japan/PG-80246/2021 | EPI_ISL_3870713 | 2021-09-02      |
| hCoV-19/Japan/PG-80247/2021 | EPI_ISL_3870714 | 2021-09-02      |
| hCoV-19/Japan/PG-80248/2021 | EPI_ISL_3870715 | 2021-09-02      |
| hCoV-19/Japan/PG-80249/2021 | EPI_ISL_3870716 | 2021-09-02      |
| hCoV-19/Japan/PG-80250/2021 | EPI_ISL_3870717 | 2021-09-02      |
| hCoV-19/Japan/PG-80251/2021 | EPI_ISL_3870718 | 2021-09-02      |
| hCoV-19/Japan/PG-80252/2021 | EPI_ISL_3870719 | 2021-09-02      |
| hCoV-19/Japan/PG-80253/2021 | EPI_ISL_3870720 | 2021-09-02      |
| hCoV-19/Japan/PG-80254/2021 | EPI_ISL_3870721 | 2021-09-02      |
| hCoV-19/Japan/PG-80255/2021 | EPI_ISL_3870722 | 2021-09-02      |
| hCoV-19/Japan/PG-80256/2021 | EPI_ISL_3870723 | 2021-09-02      |
| hCoV-19/Japan/PG-80257/2021 | EPI_ISL_3870724 | 2021-09-02      |
| hCoV-19/Japan/PG-80258/2021 | EPI_ISL_3870725 | 2021-09-02      |
| hCoV-19/Japan/PG-80259/2021 | EPI_ISL_3870726 | 2021-09-02      |
| hCoV-19/Japan/PG-80260/2021 | EPI_ISL_3870727 | 2021-09-02      |
| hCoV-19/Japan/PG-80261/2021 | EPI_ISL_3870728 | 2021-09-02      |
| hCoV-19/Japan/PG-80262/2021 | EPI_ISL_3870729 | 2021-09-02      |
| hCoV-19/Japan/PG-80263/2021 | EPI_ISL_3870730 | 2021-09-02      |
| hCoV-19/Japan/PG-80264/2021 | EPI_ISL_3870731 | 2021-09-02      |
| hCoV-19/Japan/PG-80265/2021 | EPI_ISL_3870732 | 2021-09-02      |
| hCoV-19/Japan/PG-80266/2021 | EPI_ISL_3870733 | 2021-09-02      |
| hCoV-19/Japan/PG-80267/2021 | EPI_ISL_3870734 | 2021-09-02      |
| hCoV-19/Japan/PG-80268/2021 | EPI_ISL_3870735 | 2021-09-02      |
| hCoV-19/Japan/PG-80269/2021 | EPI_ISL_3870736 | 2021-09-02      |
| hCoV-19/Japan/PG-80270/2021 | EPI_ISL_3870737 | 2021-09-02      |
| hCoV-19/Japan/PG-80271/2021 | EPI_ISL_3870738 | 2021-09-02      |
| hCoV-19/Japan/PG-80272/2021 | EPI_ISL_3870739 | 2021-09-02      |
| hCoV-19/Japan/PG-80273/2021 | EPI_ISL_3870740 | 2021-09-02      |
| hCoV-19/Japan/PG-80274/2021 | EPI_ISL_3870741 | 2021-09-02      |
| hCoV-19/Japan/PG-80275/2021 | EPI_ISL_3870742 | 2021-09-02      |



| virus_name                  | epiID           | submission_date |
|-----------------------------|-----------------|-----------------|
| hCoV-19/Japan/PG-80276/2021 | EPI_ISL_3870743 | 2021-09-02      |
| hCoV-19/Japan/PG-80277/2021 | EPI_ISL_3870744 | 2021-09-02      |
| hCoV-19/Japan/PG-80278/2021 | EPI_ISL_3870745 | 2021-09-02      |
| hCoV-19/Japan/PG-80279/2021 | EPI_ISL_3870746 | 2021-09-02      |
| hCoV-19/Japan/PG-80280/2021 | EPI_ISL_3870747 | 2021-09-02      |
| hCoV-19/Japan/PG-80281/2021 | EPI_ISL_3870748 | 2021-09-02      |
| hCoV-19/Japan/PG-80282/2021 | EPI_ISL_3870749 | 2021-09-02      |
| hCoV-19/Japan/PG-80283/2021 | EPI_ISL_3870750 | 2021-09-02      |
| hCoV-19/Japan/PG-80284/2021 | EPI_ISL_3870751 | 2021-09-02      |
| hCoV-19/Japan/PG-80285/2021 | EPI_ISL_3870752 | 2021-09-02      |
| hCoV-19/Japan/PG-80286/2021 | EPI_ISL_3870753 | 2021-09-02      |
| hCoV-19/Japan/PG-80287/2021 | EPI_ISL_3870754 | 2021-09-02      |
| hCoV-19/Japan/PG-80288/2021 | EPI_ISL_3870755 | 2021-09-02      |
| hCoV-19/Japan/PG-80289/2021 | EPI_ISL_3870756 | 2021-09-02      |
| hCoV-19/Japan/PG-80290/2021 | EPI_ISL_3870757 | 2021-09-02      |
| hCoV-19/Japan/PG-80291/2021 | EPI_ISL_3870758 | 2021-09-02      |
| hCoV-19/Japan/PG-80292/2021 | EPI_ISL_3873447 | 2021-09-02      |
| hCoV-19/Japan/PG-80293/2021 | EPI_ISL_3873448 | 2021-09-02      |
| hCoV-19/Japan/PG-80294/2021 | EPI_ISL_3873449 | 2021-09-02      |
| hCoV-19/Japan/PG-80295/2021 | EPI_ISL_3873450 | 2021-09-02      |
| hCoV-19/Japan/PG-80296/2021 | EPI_ISL_3873451 | 2021-09-02      |
| hCoV-19/Japan/PG-80297/2021 | EPI_ISL_3873452 | 2021-09-02      |
| hCoV-19/Japan/PG-80298/2021 | EPI_ISL_3873453 | 2021-09-02      |
| hCoV-19/Japan/PG-80299/2021 | EPI_ISL_3873454 | 2021-09-02      |
| hCoV-19/Japan/PG-80300/2021 | EPI_ISL_3873455 | 2021-09-02      |
| hCoV-19/Japan/PG-80301/2021 | EPI_ISL_3873456 | 2021-09-02      |
| hCoV-19/Japan/PG-80302/2021 | EPI_ISL_3873457 | 2021-09-02      |
| hCoV-19/Japan/PG-80303/2021 | EPI_ISL_3873458 | 2021-09-02      |
| hCoV-19/Japan/PG-80304/2021 | EPI_ISL_3873459 | 2021-09-02      |
| hCoV-19/Japan/PG-80305/2021 | EPI_ISL_3873460 | 2021-09-02      |
| hCoV-19/Japan/PG-80306/2021 | EPI_ISL_3873461 | 2021-09-02      |
| hCoV-19/Japan/PG-80307/2021 | EPI_ISL_3873462 | 2021-09-02      |
| hCoV-19/Japan/PG-80308/2021 | EPI_ISL_3873463 | 2021-09-02      |
| hCoV-19/Japan/PG-80309/2021 | EPI_ISL_3873464 | 2021-09-02      |
| hCoV-19/Japan/PG-80310/2021 | EPI_ISL_3873465 | 2021-09-02      |
| hCoV-19/Japan/PG-80311/2021 | EPI_ISL_3873466 | 2021-09-02      |
| hCoV-19/Japan/PG-80312/2021 | EPI_ISL_3873467 | 2021-09-02      |
| hCoV-19/Japan/PG-80313/2021 | EPI_ISL_3872427 | 2021-09-02      |
| hCoV-19/Japan/PG-80314/2021 | EPI_ISL_3872428 | 2021-09-02      |
| hCoV-19/Japan/PG-80315/2021 | EPI_ISL_3872429 | 2021-09-02      |
| hCoV-19/Japan/PG-80316/2021 | EPI_ISL_3872430 | 2021-09-02      |
| hCoV-19/Japan/PG-80317/2021 | EPI_ISL_3872431 | 2021-09-02      |
| hCoV-19/Japan/PG-80318/2021 | EPI_ISL_3872432 | 2021-09-02      |
| hCoV-19/Japan/PG-80319/2021 | EPI_ISL_3872433 | 2021-09-02      |
| hCoV-19/Japan/PG-80320/2021 | EPI_ISL_3872434 | 2021-09-02      |
| hCoV-19/Japan/PG-80321/2021 | EPI_ISL_3872435 | 2021-09-02      |
| hCoV-19/Japan/PG-80322/2021 | EPI_ISL_3872436 | 2021-09-02      |
| hCoV-19/Japan/PG-80323/2021 | EPI_ISL_3872437 | 2021-09-02      |
| hCoV-19/Japan/PG-80324/2021 | EPI_ISL_3872438 | 2021-09-02      |
| hCoV-19/Japan/PG-80325/2021 | EPI_ISL_3872439 | 2021-09-02      |
| hCoV-19/Japan/PG-80326/2021 | EPI_ISL_3872440 | 2021-09-02      |
| hCoV-19/Japan/PG-80327/2021 | EPI_ISL_3872441 | 2021-09-02      |
| hCoV-19/Japan/PG-80328/2021 | EPI_ISL_3872442 | 2021-09-02      |
| hCoV-19/Japan/PG-80329/2021 | EPI_ISL_3872443 | 2021-09-02      |

| virus_name                  | epiID           | submission_date |
|-----------------------------|-----------------|-----------------|
| hCoV-19/Japan/PG-80330/2021 | EPI_ISL_3872444 | 2021-09-02      |
| hCoV-19/Japan/PG-80331/2021 | EPI_ISL_3872445 | 2021-09-02      |
| hCoV-19/Japan/PG-80332/2021 | EPI_ISL_3872446 | 2021-09-02      |
| hCoV-19/Japan/PG-80333/2021 | EPI_ISL_3872447 | 2021-09-02      |
| hCoV-19/Japan/PG-80334/2021 | EPI_ISL_3872448 | 2021-09-02      |
| hCoV-19/Japan/PG-80335/2021 | EPI_ISL_3872449 | 2021-09-02      |
| hCoV-19/Japan/PG-80336/2021 | EPI_ISL_3872775 | 2021-09-02      |
| hCoV-19/Japan/PG-80337/2021 | EPI_ISL_3872776 | 2021-09-02      |
| hCoV-19/Japan/PG-80338/2021 | EPI_ISL_3872777 | 2021-09-02      |
| hCoV-19/Japan/PG-80339/2021 | EPI_ISL_3872778 | 2021-09-02      |
| hCoV-19/Japan/PG-80340/2021 | EPI_ISL_3872779 | 2021-09-02      |
| hCoV-19/Japan/PG-80341/2021 | EPI_ISL_3872780 | 2021-09-02      |
| hCoV-19/Japan/PG-80342/2021 | EPI_ISL_3872781 | 2021-09-02      |
| hCoV-19/Japan/PG-80343/2021 | EPI_ISL_3872782 | 2021-09-02      |
| hCoV-19/Japan/PG-80344/2021 | EPI_ISL_3872783 | 2021-09-02      |
| hCoV-19/Japan/PG-80345/2021 | EPI_ISL_3872784 | 2021-09-02      |
| hCoV-19/Japan/PG-80346/2021 | EPI_ISL_3872785 | 2021-09-02      |
| hCoV-19/Japan/PG-80347/2021 | EPI_ISL_3872786 | 2021-09-02      |
| hCoV-19/Japan/PG-80348/2021 | EPI_ISL_3872787 | 2021-09-02      |
| hCoV-19/Japan/PG-80349/2021 | EPI_ISL_3872788 | 2021-09-02      |
| hCoV-19/Japan/PG-80350/2021 | EPI_ISL_3872789 | 2021-09-02      |
| hCoV-19/Japan/PG-80351/2021 | EPI_ISL_3872790 | 2021-09-02      |
| hCoV-19/Japan/PG-80352/2021 | EPI_ISL_3872791 | 2021-09-02      |
| hCoV-19/Japan/PG-80353/2021 | EPI_ISL_3872792 | 2021-09-02      |
| hCoV-19/Japan/PG-80354/2021 | EPI_ISL_3872793 | 2021-09-02      |
| hCoV-19/Japan/PG-80355/2021 | EPI_ISL_3872794 | 2021-09-02      |
| hCoV-19/Japan/PG-80356/2021 | EPI_ISL_3872795 | 2021-09-02      |
| hCoV-19/Japan/PG-80357/2021 | EPI_ISL_3872796 | 2021-09-02      |
| hCoV-19/Japan/PG-80358/2021 | EPI_ISL_3872797 | 2021-09-02      |
| hCoV-19/Japan/PG-80359/2021 | EPI_ISL_3872798 | 2021-09-02      |
| hCoV-19/Japan/PG-80360/2021 | EPI_ISL_3872799 | 2021-09-02      |
| hCoV-19/Japan/PG-80361/2021 | EPI_ISL_3872800 | 2021-09-02      |
| hCoV-19/Japan/PG-80362/2021 | EPI_ISL_3872801 | 2021-09-02      |
| hCoV-19/Japan/PG-80363/2021 | EPI_ISL_3872802 | 2021-09-02      |
| hCoV-19/Japan/PG-80364/2021 | EPI_ISL_3872803 | 2021-09-02      |
| hCoV-19/Japan/PG-80365/2021 | EPI_ISL_3872804 | 2021-09-02      |
| hCoV-19/Japan/PG-80366/2021 | EPI_ISL_3872805 | 2021-09-02      |
| hCoV-19/Japan/PG-80367/2021 | EPI_ISL_3872806 | 2021-09-02      |
| hCoV-19/Japan/PG-80368/2021 | EPI_ISL_3872807 | 2021-09-02      |
| hCoV-19/Japan/PG-80369/2021 | EPI_ISL_3872808 | 2021-09-02      |
| hCoV-19/Japan/PG-80370/2021 | EPI_ISL_3872809 | 2021-09-02      |
| hCoV-19/Japan/PG-80371/2021 | EPI_ISL_3872810 | 2021-09-02      |
| hCoV-19/Japan/PG-80372/2021 | EPI_ISL_3872811 | 2021-09-02      |
| hCoV-19/Japan/PG-80373/2021 | EPI_ISL_3872812 | 2021-09-02      |
| hCoV-19/Japan/PG-80374/2021 | EPI_ISL_3872813 | 2021-09-02      |
| hCoV-19/Japan/PG-80375/2021 | EPI_ISL_3872814 | 2021-09-02      |
| hCoV-19/Japan/PG-80376/2021 | EPI_ISL_3872815 | 2021-09-02      |
| hCoV-19/Japan/PG-80377/2021 | EPI_ISL_3872816 | 2021-09-02      |
| hCoV-19/Japan/PG-80378/2021 | EPI_ISL_3872817 | 2021-09-02      |
| hCoV-19/Japan/PG-80379/2021 | EPI_ISL_3872818 | 2021-09-02      |
| hCoV-19/Japan/PG-80380/2021 | EPI_ISL_3872819 | 2021-09-02      |
| hCoV-19/Japan/PG-80381/2021 | EPI_ISL_3872820 | 2021-09-02      |
| hCoV-19/Japan/PG-80382/2021 | EPI_ISL_3872821 | 2021-09-02      |
| hCoV-19/Japan/PG-80383/2021 | EPI_ISL_3872822 | 2021-09-02      |

| virus_name                  | epiID           | submission_date |
|-----------------------------|-----------------|-----------------|
| hCoV-19/Japan/PG-80384/2021 | EPI_ISL_3872823 | 2021-09-02      |
| hCoV-19/Japan/PG-80385/2021 | EPI_ISL_3872824 | 2021-09-02      |
| hCoV-19/Japan/PG-80386/2021 | EPI_ISL_3872825 | 2021-09-02      |
| hCoV-19/Japan/PG-80387/2021 | EPI_ISL_3872826 | 2021-09-02      |
| hCoV-19/Japan/PG-80388/2021 | EPI_ISL_3872827 | 2021-09-02      |
| hCoV-19/Japan/PG-80389/2021 | EPI_ISL_3872828 | 2021-09-02      |
| hCoV-19/Japan/PG-80390/2021 | EPI_ISL_3872829 | 2021-09-02      |
| hCoV-19/Japan/PG-80391/2021 | EPI_ISL_3872830 | 2021-09-02      |
| hCoV-19/Japan/PG-80392/2021 | EPI_ISL_3872831 | 2021-09-02      |
| hCoV-19/Japan/PG-80393/2021 | EPI_ISL_3872832 | 2021-09-02      |
| hCoV-19/Japan/PG-80394/2021 | EPI_ISL_3872833 | 2021-09-02      |
| hCoV-19/Japan/PG-80395/2021 | EPI_ISL_3872834 | 2021-09-02      |
| hCoV-19/Japan/PG-80396/2021 | EPI_ISL_3872835 | 2021-09-02      |
| hCoV-19/Japan/PG-80397/2021 | EPI_ISL_3872836 | 2021-09-02      |
| hCoV-19/Japan/PG-80398/2021 | EPI_ISL_3872837 | 2021-09-02      |
| hCoV-19/Japan/PG-80399/2021 | EPI_ISL_3872838 | 2021-09-02      |
| hCoV-19/Japan/PG-80400/2021 | EPI_ISL_3872839 | 2021-09-02      |
| hCoV-19/Japan/PG-80401/2021 | EPI_ISL_3872840 | 2021-09-02      |
| hCoV-19/Japan/PG-80402/2021 | EPI_ISL_3872841 | 2021-09-02      |
| hCoV-19/Japan/PG-80403/2021 | EPI_ISL_3872842 | 2021-09-02      |
| hCoV-19/Japan/PG-80404/2021 | EPI_ISL_3872843 | 2021-09-02      |
| hCoV-19/Japan/PG-80405/2021 | EPI_ISL_3872844 | 2021-09-02      |
| hCoV-19/Japan/PG-80406/2021 | EPI_ISL_3872845 | 2021-09-02      |
| hCoV-19/Japan/PG-80407/2021 | EPI_ISL_3872846 | 2021-09-02      |
| hCoV-19/Japan/PG-80408/2021 | EPI_ISL_3872847 | 2021-09-02      |
| hCoV-19/Japan/PG-80409/2021 | EPI_ISL_3872848 | 2021-09-02      |
| hCoV-19/Japan/PG-80410/2021 | EPI_ISL_3872849 | 2021-09-02      |
| hCoV-19/Japan/PG-80411/2021 | EPI_ISL_3872850 | 2021-09-02      |
| hCoV-19/Japan/PG-80412/2021 | EPI_ISL_3872851 | 2021-09-02      |
| hCoV-19/Japan/PG-80413/2021 | EPI_ISL_3872852 | 2021-09-02      |
| hCoV-19/Japan/PG-80414/2021 | EPI_ISL_3872853 | 2021-09-02      |
| hCoV-19/Japan/PG-80415/2021 | EPI_ISL_3872854 | 2021-09-02      |
| hCoV-19/Japan/PG-80416/2021 | EPI_ISL_3872855 | 2021-09-02      |
| hCoV-19/Japan/PG-80417/2021 | EPI_ISL_3872856 | 2021-09-02      |
| hCoV-19/Japan/PG-80418/2021 | EPI_ISL_3872857 | 2021-09-02      |
| hCoV-19/Japan/PG-80419/2021 | EPI_ISL_3872858 | 2021-09-02      |
| hCoV-19/Japan/PG-80420/2021 | EPI_ISL_3872859 | 2021-09-02      |
| hCoV-19/Japan/PG-80421/2021 | EPI_ISL_3871614 | 2021-09-02      |
| hCoV-19/Japan/PG-80422/2021 | EPI_ISL_3871615 | 2021-09-02      |
| hCoV-19/Japan/PG-80423/2021 | EPI_ISL_3871616 | 2021-09-02      |
| hCoV-19/Japan/PG-80424/2021 | EPI_ISL_3871617 | 2021-09-02      |
| hCoV-19/Japan/PG-80425/2021 | EPI_ISL_3871618 | 2021-09-02      |
| hCoV-19/Japan/PG-80426/2021 | EPI_ISL_3871619 | 2021-09-02      |
| hCoV-19/Japan/PG-80427/2021 | EPI_ISL_3871620 | 2021-09-02      |
| hCoV-19/Japan/PG-80428/2021 | EPI_ISL_3871621 | 2021-09-02      |
| hCoV-19/Japan/PG-80429/2021 | EPI_ISL_3871622 | 2021-09-02      |
| hCoV-19/Japan/PG-80430/2021 | EPI_ISL_3871623 | 2021-09-02      |
| hCoV-19/Japan/PG-80431/2021 | EPI_ISL_3871624 | 2021-09-02      |
| hCoV-19/Japan/PG-80432/2021 | EPI_ISL_3871625 | 2021-09-02      |
| hCoV-19/Japan/PG-80433/2021 | EPI_ISL_3871626 | 2021-09-02      |
| hCoV-19/Japan/PG-80434/2021 | EPI_ISL_3871627 | 2021-09-02      |
| hCoV-19/Japan/PG-80435/2021 | EPI_ISL_3871628 | 2021-09-02      |
| hCoV-19/Japan/PG-80436/2021 | EPI_ISL_3871629 | 2021-09-02      |
| hCoV-19/Japan/PG-80437/2021 | EPI_ISL_3871630 | 2021-09-02      |

| virus_name                  | epiID           | submission_date |
|-----------------------------|-----------------|-----------------|
| hCoV-19/Japan/PG-80438/2021 | EPI_ISL_3871631 | 2021-09-02      |
| hCoV-19/Japan/PG-80439/2021 | EPI_ISL_3871632 | 2021-09-02      |
| hCoV-19/Japan/PG-80440/2021 | EPI_ISL_3871633 | 2021-09-02      |
| hCoV-19/Japan/PG-80441/2021 | EPI_ISL_3892182 | 2021-09-02      |
| hCoV-19/Japan/PG-80442/2021 | EPI_ISL_3892184 | 2021-09-02      |
| hCoV-19/Japan/PG-80443/2021 | EPI_ISL_3892186 | 2021-09-02      |
| hCoV-19/Japan/PG-80444/2021 | EPI_ISL_3892189 | 2021-09-02      |
| hCoV-19/Japan/PG-80445/2021 | EPI_ISL_3892191 | 2021-09-02      |
| hCoV-19/Japan/PG-80446/2021 | EPI_ISL_3892193 | 2021-09-02      |
| hCoV-19/Japan/PG-80447/2021 | EPI_ISL_3892196 | 2021-09-02      |
| hCoV-19/Japan/PG-80448/2021 | EPI_ISL_3892197 | 2021-09-02      |
| hCoV-19/Japan/PG-80449/2021 | EPI_ISL_3871283 | 2021-09-02      |
| hCoV-19/Japan/PG-80450/2021 | EPI_ISL_3871284 | 2021-09-02      |
| hCoV-19/Japan/PG-80451/2021 | EPI_ISL_3871285 | 2021-09-02      |
| hCoV-19/Japan/PG-80452/2021 | EPI_ISL_3871286 | 2021-09-02      |
| hCoV-19/Japan/PG-80453/2021 | EPI_ISL_3871287 | 2021-09-02      |
| hCoV-19/Japan/PG-80454/2021 | EPI_ISL_3871288 | 2021-09-02      |
| hCoV-19/Japan/PG-80455/2021 | EPI_ISL_3871289 | 2021-09-02      |
| hCoV-19/Japan/PG-80456/2021 | EPI_ISL_3871290 | 2021-09-02      |
| hCoV-19/Japan/PG-80463/2021 | EPI_ISL_3874028 | 2021-09-02      |
| hCoV-19/Japan/PG-80466/2021 | EPI_ISL_3874029 | 2021-09-02      |
| hCoV-19/Japan/PG-80467/2021 | EPI_ISL_3874030 | 2021-09-02      |
| hCoV-19/Japan/PG-80473/2021 | EPI_ISL_3874031 | 2021-09-02      |
| hCoV-19/Japan/PG-80474/2021 | EPI_ISL_3874032 | 2021-09-02      |
| hCoV-19/Japan/PG-80475/2021 | EPI_ISL_3874033 | 2021-09-02      |
| hCoV-19/Japan/PG-80476/2021 | EPI_ISL_3874034 | 2021-09-02      |
| hCoV-19/Japan/PG-80477/2021 | EPI_ISL_3874035 | 2021-09-02      |
| hCoV-19/Japan/PG-80478/2021 | EPI_ISL_3874036 | 2021-09-02      |
| hCoV-19/Japan/PG-80479/2021 | EPI_ISL_3872041 | 2021-09-02      |
| hCoV-19/Japan/PG-80480/2021 | EPI_ISL_3872042 | 2021-09-02      |
| hCoV-19/Japan/PG-80481/2021 | EPI_ISL_3872043 | 2021-09-02      |
| hCoV-19/Japan/PG-80482/2021 | EPI_ISL_3872044 | 2021-09-02      |
| hCoV-19/Japan/PG-80483/2021 | EPI_ISL_3872045 | 2021-09-02      |
| hCoV-19/Japan/PG-80484/2021 | EPI_ISL_3872046 | 2021-09-02      |
| hCoV-19/Japan/PG-80485/2021 | EPI_ISL_3872047 | 2021-09-02      |
| hCoV-19/Japan/PG-80486/2021 | EPI_ISL_3872048 | 2021-09-02      |
| hCoV-19/Japan/PG-80487/2021 | EPI_ISL_3872049 | 2021-09-02      |
| hCoV-19/Japan/PG-80488/2021 | EPI_ISL_3872050 | 2021-09-02      |
| hCoV-19/Japan/PG-80489/2021 | EPI_ISL_3872051 | 2021-09-02      |
| hCoV-19/Japan/PG-80490/2021 | EPI_ISL_3872052 | 2021-09-02      |
| hCoV-19/Japan/PG-80491/2021 | EPI_ISL_3872053 | 2021-09-02      |
| hCoV-19/Japan/PG-80492/2021 | EPI_ISL_3872054 | 2021-09-02      |
| hCoV-19/Japan/PG-80493/2021 | EPI_ISL_3872055 | 2021-09-02      |
| hCoV-19/Japan/PG-80494/2021 | EPI_ISL_3872056 | 2021-09-02      |
| hCoV-19/Japan/PG-80495/2021 | EPI_ISL_3872057 | 2021-09-02      |
| hCoV-19/Japan/PG-80496/2021 | EPI_ISL_3872058 | 2021-09-02      |
| hCoV-19/Japan/PG-80497/2021 | EPI_ISL_3872059 | 2021-09-02      |
| hCoV-19/Japan/PG-80498/2021 | EPI_ISL_3872060 | 2021-09-02      |
| hCoV-19/Japan/PG-80499/2021 | EPI_ISL_3872061 | 2021-09-02      |
| hCoV-19/Japan/PG-80500/2021 | EPI_ISL_3872062 | 2021-09-02      |
| hCoV-19/Japan/PG-80501/2021 | EPI_ISL_3872063 | 2021-09-02      |
| hCoV-19/Japan/PG-80502/2021 | EPI_ISL_3872064 | 2021-09-02      |
| hCoV-19/Japan/PG-80503/2021 | EPI_ISL_3872065 | 2021-09-02      |
| hCoV-19/Japan/PG-80504/2021 | EPI_ISL_3872066 | 2021-09-02      |

| virus_name                  | epiID           | submission_date |
|-----------------------------|-----------------|-----------------|
| hCoV-19/Japan/PG-80505/2021 | EPI_ISL_3872067 | 2021-09-02      |
| hCoV-19/Japan/PG-80506/2021 | EPI_ISL_3872068 | 2021-09-02      |
| hCoV-19/Japan/PG-80507/2021 | EPI_ISL_3872069 | 2021-09-02      |
| hCoV-19/Japan/PG-80508/2021 | EPI_ISL_3872070 | 2021-09-02      |
| hCoV-19/Japan/PG-80509/2021 | EPI_ISL_3872071 | 2021-09-02      |
| hCoV-19/Japan/PG-80510/2021 | EPI_ISL_3872072 | 2021-09-02      |
| hCoV-19/Japan/PG-80511/2021 | EPI_ISL_3872073 | 2021-09-02      |
| hCoV-19/Japan/PG-80512/2021 | EPI_ISL_3872074 | 2021-09-02      |
| hCoV-19/Japan/PG-80513/2021 | EPI_ISL_3872075 | 2021-09-02      |
| hCoV-19/Japan/PG-80514/2021 | EPI_ISL_3872076 | 2021-09-02      |
| hCoV-19/Japan/PG-80515/2021 | EPI_ISL_3872077 | 2021-09-02      |
| hCoV-19/Japan/PG-80516/2021 | EPI_ISL_3872078 | 2021-09-02      |
| hCoV-19/Japan/PG-80517/2021 | EPI_ISL_3872079 | 2021-09-02      |
| hCoV-19/Japan/PG-80518/2021 | EPI_ISL_3872080 | 2021-09-02      |
| hCoV-19/Japan/PG-80519/2021 | EPI_ISL_3872081 | 2021-09-02      |
| hCoV-19/Japan/PG-80520/2021 | EPI_ISL_3872082 | 2021-09-02      |
| hCoV-19/Japan/PG-80521/2021 | EPI_ISL_3872083 | 2021-09-02      |
| hCoV-19/Japan/PG-80522/2021 | EPI_ISL_3872356 | 2021-09-02      |
| hCoV-19/Japan/PG-80523/2021 | EPI_ISL_3872357 | 2021-09-02      |
| hCoV-19/Japan/PG-80524/2021 | EPI_ISL_3872358 | 2021-09-02      |
| hCoV-19/Japan/PG-80525/2021 | EPI_ISL_3872359 | 2021-09-02      |
| hCoV-19/Japan/PG-80528/2021 | EPI_ISL_3874347 | 2021-09-02      |
| hCoV-19/Japan/PG-80529/2021 | EPI_ISL_3874348 | 2021-09-02      |
| hCoV-19/Japan/PG-80530/2021 | EPI_ISL_3874349 | 2021-09-02      |
| hCoV-19/Japan/PG-80531/2021 | EPI_ISL_3874350 | 2021-09-02      |
| hCoV-19/Japan/PG-80532/2021 | EPI_ISL_3874351 | 2021-09-02      |
| hCoV-19/Japan/PG-80533/2021 | EPI_ISL_3874352 | 2021-09-02      |
| hCoV-19/Japan/PG-80534/2021 | EPI_ISL_3874353 | 2021-09-02      |
| hCoV-19/Japan/PG-80535/2021 | EPI_ISL_3874354 | 2021-09-02      |
| hCoV-19/Japan/PG-80536/2021 | EPI_ISL_3874355 | 2021-09-02      |
| hCoV-19/Japan/PG-80537/2021 | EPI_ISL_3874356 | 2021-09-02      |
| hCoV-19/Japan/PG-80538/2021 | EPI_ISL_3874357 | 2021-09-02      |
| hCoV-19/Japan/PG-80539/2021 | EPI_ISL_3874358 | 2021-09-02      |
| hCoV-19/Japan/PG-80540/2021 | EPI_ISL_3874359 | 2021-09-02      |
| hCoV-19/Japan/PG-80541/2021 | EPI_ISL_3874360 | 2021-09-02      |
| hCoV-19/Japan/PG-80542/2021 | EPI_ISL_3874361 | 2021-09-02      |
| hCoV-19/Japan/PG-80543/2021 | EPI_ISL_3874362 | 2021-09-02      |
| hCoV-19/Japan/PG-80544/2021 | EPI_ISL_3874363 | 2021-09-02      |
| hCoV-19/Japan/PG-80545/2021 | EPI_ISL_3874364 | 2021-09-02      |
| hCoV-19/Japan/PG-80546/2021 | EPI_ISL_3874365 | 2021-09-02      |
| hCoV-19/Japan/PG-80547/2021 | EPI_ISL_3874366 | 2021-09-02      |
| hCoV-19/Japan/PG-80548/2021 | EPI_ISL_3874367 | 2021-09-02      |
| hCoV-19/Japan/PG-80549/2021 | EPI_ISL_3874368 | 2021-09-02      |
| hCoV-19/Japan/PG-80550/2021 | EPI_ISL_3874369 | 2021-09-02      |
| hCoV-19/Japan/PG-80551/2021 | EPI_ISL_3874370 | 2021-09-02      |
| hCoV-19/Japan/PG-80573/2021 | EPI_ISL_3872174 | 2021-09-02      |
| hCoV-19/Japan/PG-80574/2021 | EPI_ISL_3872175 | 2021-09-02      |
| hCoV-19/Japan/PG-80575/2021 | EPI_ISL_3872176 | 2021-09-02      |
| hCoV-19/Japan/PG-80576/2021 | EPI_ISL_3872177 | 2021-09-02      |
| hCoV-19/Japan/PG-80577/2021 | EPI_ISL_3872178 | 2021-09-02      |
| hCoV-19/Japan/PG-80578/2021 | EPI_ISL_3872179 | 2021-09-02      |
| hCoV-19/Japan/PG-80579/2021 | EPI_ISL_3872180 | 2021-09-02      |
| hCoV-19/Japan/PG-80580/2021 | EPI_ISL_3872181 | 2021-09-02      |
| hCoV-19/Japan/PG-80581/2021 | EPI_ISL_3872182 | 2021-09-02      |

| virus_name                  | epiID           | submission_date |
|-----------------------------|-----------------|-----------------|
| hCoV-19/Japan/PG-80582/2021 | EPI_ISL_3872183 | 2021-09-02      |
| hCoV-19/Japan/PG-80583/2021 | EPI_ISL_3872184 | 2021-09-02      |
| hCoV-19/Japan/PG-80584/2021 | EPI_ISL_3872185 | 2021-09-02      |
| hCoV-19/Japan/PG-80585/2021 | EPI_ISL_3872186 | 2021-09-02      |
| hCoV-19/Japan/PG-80586/2021 | EPI_ISL_3872187 | 2021-09-02      |
| hCoV-19/Japan/PG-80587/2021 | EPI_ISL_3872188 | 2021-09-02      |
| hCoV-19/Japan/PG-80588/2021 | EPI_ISL_3872189 | 2021-09-02      |
| hCoV-19/Japan/PG-80589/2021 | EPI_ISL_3872190 | 2021-09-02      |
| hCoV-19/Japan/PG-80590/2021 | EPI_ISL_3872191 | 2021-09-02      |
| hCoV-19/Japan/PG-80591/2021 | EPI_ISL_3872192 | 2021-09-02      |
| hCoV-19/Japan/PG-80592/2021 | EPI_ISL_3872193 | 2021-09-02      |
| hCoV-19/Japan/PG-80593/2021 | EPI_ISL_3872194 | 2021-09-02      |
| hCoV-19/Japan/PG-80594/2021 | EPI_ISL_3872195 | 2021-09-02      |
| hCoV-19/Japan/PG-80595/2021 | EPI_ISL_3872196 | 2021-09-02      |
| hCoV-19/Japan/PG-80596/2021 | EPI_ISL_3872298 | 2021-09-02      |
| hCoV-19/Japan/PG-80597/2021 | EPI_ISL_3872299 | 2021-09-02      |
| hCoV-19/Japan/PG-80598/2021 | EPI_ISL_3872300 | 2021-09-02      |
| hCoV-19/Japan/PG-80599/2021 | EPI_ISL_3872301 | 2021-09-02      |
| hCoV-19/Japan/PG-80600/2021 | EPI_ISL_3892200 | 2021-09-02      |
| hCoV-19/Japan/PG-80601/2021 | EPI_ISL_3892202 | 2021-09-02      |
| hCoV-19/Japan/PG-80602/2021 | EPI_ISL_3892205 | 2021-09-02      |
| hCoV-19/Japan/PG-80603/2021 | EPI_ISL_3892208 | 2021-09-02      |
| hCoV-19/Japan/PG-80604/2021 | EPI_ISL_3892211 | 2021-09-02      |
| hCoV-19/Japan/PG-80605/2021 | EPI_ISL_3892213 | 2021-09-02      |
| hCoV-19/Japan/PG-80606/2021 | EPI_ISL_3892216 | 2021-09-02      |
| hCoV-19/Japan/PG-80607/2021 | EPI_ISL_3892218 | 2021-09-02      |
| hCoV-19/Japan/PG-80608/2021 | EPI_ISL_3892221 | 2021-09-02      |
| hCoV-19/Japan/PG-80609/2021 | EPI_ISL_3892224 | 2021-09-02      |
| hCoV-19/Japan/PG-80610/2021 | EPI_ISL_3892226 | 2021-09-02      |
| hCoV-19/Japan/PG-80611/2021 | EPI_ISL_3892229 | 2021-09-02      |
| hCoV-19/Japan/PG-80612/2021 | EPI_ISL_3892232 | 2021-09-02      |
| hCoV-19/Japan/PG-80613/2021 | EPI_ISL_3892235 | 2021-09-02      |
| hCoV-19/Japan/PG-80614/2021 | EPI_ISL_3892238 | 2021-09-02      |
| hCoV-19/Japan/PG-80615/2021 | EPI_ISL_3892240 | 2021-09-02      |
| hCoV-19/Japan/PG-80616/2021 | EPI_ISL_3892243 | 2021-09-02      |
| hCoV-19/Japan/PG-80617/2021 | EPI_ISL_3892246 | 2021-09-02      |
| hCoV-19/Japan/PG-80618/2021 | EPI_ISL_3892249 | 2021-09-02      |
| hCoV-19/Japan/PG-80619/2021 | EPI_ISL_3892251 | 2021-09-02      |
| hCoV-19/Japan/PG-80620/2021 | EPI_ISL_3892253 | 2021-09-02      |
| hCoV-19/Japan/PG-80621/2021 | EPI_ISL_3892256 | 2021-09-02      |
| hCoV-19/Japan/PG-80622/2021 | EPI_ISL_3892257 | 2021-09-02      |
| hCoV-19/Japan/PG-80623/2021 | EPI_ISL_3892260 | 2021-09-02      |
| hCoV-19/Japan/PG-80624/2021 | EPI_ISL_3892262 | 2021-09-02      |
| hCoV-19/Japan/PG-80625/2021 | EPI_ISL_3892263 | 2021-09-02      |
| hCoV-19/Japan/PG-80626/2021 | EPI_ISL_3892265 | 2021-09-02      |
| hCoV-19/Japan/PG-80627/2021 | EPI_ISL_3892267 | 2021-09-02      |
| hCoV-19/Japan/PG-80628/2021 | EPI_ISL_3892270 | 2021-09-02      |
| hCoV-19/Japan/PG-80629/2021 | EPI_ISL_3892272 | 2021-09-02      |
| hCoV-19/Japan/PG-80630/2021 | EPI_ISL_3892274 | 2021-09-02      |
| hCoV-19/Japan/PG-80631/2021 | EPI_ISL_3892277 | 2021-09-02      |
| hCoV-19/Japan/PG-80632/2021 | EPI_ISL_3892280 | 2021-09-02      |
| hCoV-19/Japan/PG-80633/2021 | EPI_ISL_3892282 | 2021-09-02      |
| hCoV-19/Japan/PG-80634/2021 | EPI_ISL_3892283 | 2021-09-02      |
| hCoV-19/Japan/PG-80635/2021 | EPI_ISL_3892285 | 2021-09-02      |

| virus_name                  | epiID           | submission_date |
|-----------------------------|-----------------|-----------------|
| hCoV-19/Japan/PG-80636/2021 | EPI_ISL_3892287 | 2021-09-02      |
| hCoV-19/Japan/PG-80637/2021 | EPI_ISL_3892290 | 2021-09-02      |
| hCoV-19/Japan/PG-80638/2021 | EPI_ISL_3892292 | 2021-09-02      |
| hCoV-19/Japan/PG-80639/2021 | EPI_ISL_3892295 | 2021-09-02      |
| hCoV-19/Japan/PG-80640/2021 | EPI_ISL_3892298 | 2021-09-02      |
| hCoV-19/Japan/PG-80641/2021 | EPI_ISL_3892300 | 2021-09-02      |
| hCoV-19/Japan/PG-80642/2021 | EPI_ISL_3892303 | 2021-09-02      |
| hCoV-19/Japan/PG-80643/2021 | EPI_ISL_3892305 | 2021-09-02      |
| hCoV-19/Japan/PG-80644/2021 | EPI_ISL_3892307 | 2021-09-02      |
| hCoV-19/Japan/PG-80645/2021 | EPI_ISL_3892309 | 2021-09-02      |
| hCoV-19/Japan/PG-80646/2021 | EPI_ISL_3892312 | 2021-09-02      |
| hCoV-19/Japan/PG-80647/2021 | EPI_ISL_3892314 | 2021-09-02      |
| hCoV-19/Japan/PG-80648/2021 | EPI_ISL_3892317 | 2021-09-02      |
| hCoV-19/Japan/PG-80649/2021 | EPI_ISL_3892319 | 2021-09-02      |
| hCoV-19/Japan/PG-80650/2021 | EPI_ISL_3892320 | 2021-09-02      |
| hCoV-19/Japan/PG-80651/2021 | EPI_ISL_3892323 | 2021-09-02      |
| hCoV-19/Japan/PG-80652/2021 | EPI_ISL_3892326 | 2021-09-02      |
| hCoV-19/Japan/PG-80653/2021 | EPI_ISL_3892329 | 2021-09-02      |
| hCoV-19/Japan/PG-80654/2021 | EPI_ISL_3892332 | 2021-09-02      |
| hCoV-19/Japan/PG-80655/2021 | EPI_ISL_3892335 | 2021-09-02      |
| hCoV-19/Japan/PG-80656/2021 | EPI_ISL_3892337 | 2021-09-02      |
| hCoV-19/Japan/PG-80657/2021 | EPI_ISL_3892340 | 2021-09-02      |
| hCoV-19/Japan/PG-80658/2021 | EPI_ISL_3892342 | 2021-09-02      |
| hCoV-19/Japan/PG-80659/2021 | EPI_ISL_3892345 | 2021-09-02      |
| hCoV-19/Japan/PG-80660/2021 | EPI_ISL_3892348 | 2021-09-02      |
| hCoV-19/Japan/PG-80661/2021 | EPI_ISL_3892350 | 2021-09-02      |
| hCoV-19/Japan/PG-80662/2021 | EPI_ISL_3892353 | 2021-09-02      |
| hCoV-19/Japan/PG-80663/2021 | EPI_ISL_3892354 | 2021-09-02      |
| hCoV-19/Japan/PG-80664/2021 | EPI_ISL_3892357 | 2021-09-02      |
| hCoV-19/Japan/PG-80665/2021 | EPI_ISL_3892359 | 2021-09-02      |
| hCoV-19/Japan/PG-80666/2021 | EPI_ISL_3892361 | 2021-09-02      |
| hCoV-19/Japan/PG-80667/2021 | EPI_ISL_3892365 | 2021-09-02      |
| hCoV-19/Japan/PG-80668/2021 | EPI_ISL_3892367 | 2021-09-02      |
| hCoV-19/Japan/PG-80669/2021 | EPI_ISL_3892370 | 2021-09-02      |
| hCoV-19/Japan/PG-80670/2021 | EPI_ISL_3892372 | 2021-09-02      |
| hCoV-19/Japan/PG-80671/2021 | EPI_ISL_3892374 | 2021-09-02      |
| hCoV-19/Japan/PG-80672/2021 | EPI_ISL_3892375 | 2021-09-02      |
| hCoV-19/Japan/PG-80673/2021 | EPI_ISL_3892376 | 2021-09-02      |
| hCoV-19/Japan/PG-80674/2021 | EPI_ISL_3892378 | 2021-09-02      |
| hCoV-19/Japan/PG-80675/2021 | EPI_ISL_3892380 | 2021-09-02      |
| hCoV-19/Japan/PG-80676/2021 | EPI_ISL_3892383 | 2021-09-02      |
| hCoV-19/Japan/PG-80677/2021 | EPI_ISL_3892385 | 2021-09-02      |
| hCoV-19/Japan/PG-80678/2021 | EPI_ISL_3892387 | 2021-09-02      |
| hCoV-19/Japan/PG-80679/2021 | EPI_ISL_3892388 | 2021-09-02      |
| hCoV-19/Japan/PG-80680/2021 | EPI_ISL_3892389 | 2021-09-02      |
| hCoV-19/Japan/PG-80681/2021 | EPI_ISL_3892390 | 2021-09-02      |
| hCoV-19/Japan/PG-80682/2021 | EPI_ISL_3892391 | 2021-09-02      |
| hCoV-19/Japan/PG-80683/2021 | EPI_ISL_3892392 | 2021-09-02      |
| hCoV-19/Japan/PG-80684/2021 | EPI_ISL_3892393 | 2021-09-02      |
| hCoV-19/Japan/PG-80685/2021 | EPI_ISL_3892396 | 2021-09-02      |
| hCoV-19/Japan/PG-80686/2021 | EPI_ISL_3892397 | 2021-09-02      |
| hCoV-19/Japan/PG-80687/2021 | EPI_ISL_3892399 | 2021-09-02      |
| hCoV-19/Japan/PG-80688/2021 | EPI_ISL_3892401 | 2021-09-02      |
| hCoV-19/Japan/PG-80689/2021 | EPI_ISL_3892404 | 2021-09-02      |

| virus_name                  | epiID           | submission_date |
|-----------------------------|-----------------|-----------------|
| hCoV-19/Japan/PG-80690/2021 | EPI_ISL_3892407 | 2021-09-02      |
| hCoV-19/Japan/PG-80691/2021 | EPI_ISL_3892410 | 2021-09-02      |
| hCoV-19/Japan/PG-80692/2021 | EPI_ISL_3892412 | 2021-09-02      |
| hCoV-19/Japan/PG-80693/2021 | EPI_ISL_3892415 | 2021-09-02      |
| hCoV-19/Japan/PG-80694/2021 | EPI_ISL_3892418 | 2021-09-02      |
| hCoV-19/Japan/PG-80695/2021 | EPI_ISL_3892420 | 2021-09-02      |
| hCoV-19/Japan/PG-80696/2021 | EPI_ISL_3892423 | 2021-09-02      |
| hCoV-19/Japan/PG-80697/2021 | EPI_ISL_3892426 | 2021-09-02      |
| hCoV-19/Japan/PG-80698/2021 | EPI_ISL_3892429 | 2021-09-02      |
| hCoV-19/Japan/PG-80699/2021 | EPI_ISL_3892431 | 2021-09-02      |
| hCoV-19/Japan/PG-80700/2021 | EPI_ISL_3892433 | 2021-09-02      |
| hCoV-19/Japan/PG-80701/2021 | EPI_ISL_3892435 | 2021-09-02      |
| hCoV-19/Japan/PG-80702/2021 | EPI_ISL_3892436 | 2021-09-02      |
| hCoV-19/Japan/PG-80703/2021 | EPI_ISL_3892437 | 2021-09-02      |
| hCoV-19/Japan/PG-80704/2021 | EPI_ISL_3892439 | 2021-09-02      |
| hCoV-19/Japan/PG-80705/2021 | EPI_ISL_3892442 | 2021-09-02      |
| hCoV-19/Japan/PG-80706/2021 | EPI_ISL_3892445 | 2021-09-02      |
| hCoV-19/Japan/PG-80707/2021 | EPI_ISL_3892448 | 2021-09-02      |
| hCoV-19/Japan/PG-80708/2021 | EPI_ISL_3892450 | 2021-09-02      |
| hCoV-19/Japan/PG-80709/2021 | EPI_ISL_3892453 | 2021-09-02      |
| hCoV-19/Japan/PG-80710/2021 | EPI_ISL_3892455 | 2021-09-02      |
| hCoV-19/Japan/PG-80711/2021 | EPI_ISL_3892458 | 2021-09-02      |
| hCoV-19/Japan/PG-80712/2021 | EPI_ISL_3892460 | 2021-09-02      |
| hCoV-19/Japan/PG-80713/2021 | EPI_ISL_3892462 | 2021-09-02      |
| hCoV-19/Japan/PG-80714/2021 | EPI_ISL_3892465 | 2021-09-02      |
| hCoV-19/Japan/PG-80715/2021 | EPI_ISL_3892468 | 2021-09-02      |
| hCoV-19/Japan/PG-80716/2021 | EPI_ISL_3892470 | 2021-09-02      |
| hCoV-19/Japan/PG-80717/2021 | EPI_ISL_3892472 | 2021-09-02      |
| hCoV-19/Japan/PG-80718/2021 | EPI_ISL_3892475 | 2021-09-02      |
| hCoV-19/Japan/PG-80719/2021 | EPI_ISL_3892478 | 2021-09-02      |
| hCoV-19/Japan/PG-80720/2021 | EPI_ISL_3892480 | 2021-09-02      |
| hCoV-19/Japan/PG-80721/2021 | EPI_ISL_3892481 | 2021-09-02      |
| hCoV-19/Japan/PG-80722/2021 | EPI_ISL_3892483 | 2021-09-02      |
| hCoV-19/Japan/PG-80723/2021 | EPI_ISL_3892486 | 2021-09-02      |
| hCoV-19/Japan/PG-80724/2021 | EPI_ISL_3892488 | 2021-09-02      |
| hCoV-19/Japan/PG-80725/2021 | EPI_ISL_3892491 | 2021-09-02      |
| hCoV-19/Japan/PG-80726/2021 | EPI_ISL_3892493 | 2021-09-02      |
| hCoV-19/Japan/PG-80727/2021 | EPI_ISL_3892494 | 2021-09-02      |
| hCoV-19/Japan/PG-80728/2021 | EPI_ISL_3892495 | 2021-09-02      |
| hCoV-19/Japan/PG-80729/2021 | EPI_ISL_3892498 | 2021-09-02      |
| hCoV-19/Japan/PG-80730/2021 | EPI_ISL_3892500 | 2021-09-02      |
| hCoV-19/Japan/PG-80731/2021 | EPI_ISL_3892504 | 2021-09-02      |
| hCoV-19/Japan/PG-80732/2021 | EPI_ISL_3892506 | 2021-09-02      |
| hCoV-19/Japan/PG-80733/2021 | EPI_ISL_3892509 | 2021-09-02      |
| hCoV-19/Japan/PG-80734/2021 | EPI_ISL_3892511 | 2021-09-02      |
| hCoV-19/Japan/PG-80735/2021 | EPI_ISL_3892514 | 2021-09-02      |
| hCoV-19/Japan/PG-80736/2021 | EPI_ISL_3892516 | 2021-09-02      |
| hCoV-19/Japan/PG-80737/2021 | EPI_ISL_3892518 | 2021-09-02      |
| hCoV-19/Japan/PG-80738/2021 | EPI_ISL_3892521 | 2021-09-02      |
| hCoV-19/Japan/PG-80739/2021 | EPI_ISL_3892524 | 2021-09-02      |
| hCoV-19/Japan/PG-80740/2021 | EPI_ISL_3892525 | 2021-09-02      |
| hCoV-19/Japan/PG-80741/2021 | EPI_ISL_3892528 | 2021-09-02      |
| hCoV-19/Japan/PG-80742/2021 | EPI_ISL_3892531 | 2021-09-02      |
| hCoV-19/Japan/PG-80743/2021 | EPI_ISL_3892533 | 2021-09-02      |



| virus_name                  | epiID           | submission_date |
|-----------------------------|-----------------|-----------------|
| hCoV-19/Japan/PG-80744/2021 | EPI_ISL_3892535 | 2021-09-02      |
| hCoV-19/Japan/PG-80745/2021 | EPI_ISL_3892536 | 2021-09-02      |
| hCoV-19/Japan/PG-80746/2021 | EPI_ISL_3892538 | 2021-09-02      |
| hCoV-19/Japan/PG-80747/2021 | EPI_ISL_3892539 | 2021-09-02      |
| hCoV-19/Japan/PG-80748/2021 | EPI_ISL_3892541 | 2021-09-02      |
| hCoV-19/Japan/PG-80749/2021 | EPI_ISL_3892543 | 2021-09-02      |
| hCoV-19/Japan/PG-80750/2021 | EPI_ISL_3892545 | 2021-09-02      |
| hCoV-19/Japan/PG-80751/2021 | EPI_ISL_3892548 | 2021-09-02      |
| hCoV-19/Japan/PG-80752/2021 | EPI_ISL_3892550 | 2021-09-02      |
| hCoV-19/Japan/PG-80753/2021 | EPI_ISL_3892552 | 2021-09-02      |
| hCoV-19/Japan/PG-80754/2021 | EPI_ISL_3892554 | 2021-09-02      |
| hCoV-19/Japan/PG-80755/2021 | EPI_ISL_3892555 | 2021-09-02      |
| hCoV-19/Japan/PG-80756/2021 | EPI_ISL_3892556 | 2021-09-02      |
| hCoV-19/Japan/PG-80757/2021 | EPI_ISL_3892557 | 2021-09-02      |
| hCoV-19/Japan/PG-80758/2021 | EPI_ISL_3892558 | 2021-09-02      |
| hCoV-19/Japan/PG-80759/2021 | EPI_ISL_3892559 | 2021-09-02      |
| hCoV-19/Japan/PG-80760/2021 | EPI_ISL_3892562 | 2021-09-02      |
| hCoV-19/Japan/PG-80761/2021 | EPI_ISL_3892563 | 2021-09-02      |
| hCoV-19/Japan/PG-80762/2021 | EPI_ISL_3892564 | 2021-09-02      |
| hCoV-19/Japan/PG-80763/2021 | EPI_ISL_3892567 | 2021-09-02      |
| hCoV-19/Japan/PG-80764/2021 | EPI_ISL_3892570 | 2021-09-02      |
| hCoV-19/Japan/PG-80765/2021 | EPI_ISL_3892572 | 2021-09-02      |
| hCoV-19/Japan/PG-80766/2021 | EPI_ISL_3892575 | 2021-09-02      |
| hCoV-19/Japan/PG-80767/2021 | EPI_ISL_3892578 | 2021-09-02      |
| hCoV-19/Japan/PG-80768/2021 | EPI_ISL_3892580 | 2021-09-02      |
| hCoV-19/Japan/PG-80769/2021 | EPI_ISL_3892582 | 2021-09-02      |
| hCoV-19/Japan/PG-80770/2021 | EPI_ISL_3892584 | 2021-09-02      |
| hCoV-19/Japan/PG-80771/2021 | EPI_ISL_3892587 | 2021-09-02      |
| hCoV-19/Japan/PG-80772/2021 | EPI_ISL_3892590 | 2021-09-02      |
| hCoV-19/Japan/PG-80773/2021 | EPI_ISL_3892592 | 2021-09-02      |
| hCoV-19/Japan/PG-80774/2021 | EPI_ISL_3892593 | 2021-09-02      |
| hCoV-19/Japan/PG-80775/2021 | EPI_ISL_3892595 | 2021-09-02      |
| hCoV-19/Japan/PG-80776/2021 | EPI_ISL_3892597 | 2021-09-02      |
| hCoV-19/Japan/PG-80777/2021 | EPI_ISL_3892600 | 2021-09-02      |
| hCoV-19/Japan/PG-80778/2021 | EPI_ISL_3892603 | 2021-09-02      |
| hCoV-19/Japan/PG-80779/2021 | EPI_ISL_3892605 | 2021-09-02      |
| hCoV-19/Japan/PG-80780/2021 | EPI_ISL_3892607 | 2021-09-02      |
| hCoV-19/Japan/PG-80781/2021 | EPI_ISL_3892609 | 2021-09-02      |
| hCoV-19/Japan/PG-80782/2021 | EPI_ISL_3892612 | 2021-09-02      |
| hCoV-19/Japan/PG-80783/2021 | EPI_ISL_3892614 | 2021-09-02      |
| hCoV-19/Japan/PG-80784/2021 | EPI_ISL_3892617 | 2021-09-02      |
| hCoV-19/Japan/PG-80785/2021 | EPI_ISL_3892618 | 2021-09-02      |
| hCoV-19/Japan/PG-80786/2021 | EPI_ISL_3892621 | 2021-09-02      |
| hCoV-19/Japan/PG-80787/2021 | EPI_ISL_3892624 | 2021-09-02      |
| hCoV-19/Japan/PG-80788/2021 | EPI_ISL_3892626 | 2021-09-02      |
| hCoV-19/Japan/PG-80789/2021 | EPI_ISL_3892628 | 2021-09-02      |
| hCoV-19/Japan/PG-80790/2021 | EPI_ISL_3892630 | 2021-09-02      |
| hCoV-19/Japan/PG-80791/2021 | EPI_ISL_3892632 | 2021-09-02      |
| hCoV-19/Japan/PG-80792/2021 | EPI_ISL_3892635 | 2021-09-02      |
| hCoV-19/Japan/PG-80793/2021 | EPI_ISL_3892637 | 2021-09-02      |
| hCoV-19/Japan/PG-80794/2021 | EPI_ISL_3892639 | 2021-09-02      |
| hCoV-19/Japan/PG-80795/2021 | EPI_ISL_3892642 | 2021-09-02      |
| hCoV-19/Japan/PG-80796/2021 | EPI_ISL_3892645 | 2021-09-02      |
| hCoV-19/Japan/PG-80797/2021 | EPI_ISL_3892647 | 2021-09-02      |

| virus_name                  | epiID           | submission_date |
|-----------------------------|-----------------|-----------------|
| hCoV-19/Japan/PG-80798/2021 | EPI_ISL_3892650 | 2021-09-02      |
| hCoV-19/Japan/PG-80799/2021 | EPI_ISL_3892652 | 2021-09-02      |
| hCoV-19/Japan/PG-80800/2021 | EPI_ISL_3892655 | 2021-09-02      |
| hCoV-19/Japan/PG-80801/2021 | EPI_ISL_3892658 | 2021-09-02      |
| hCoV-19/Japan/PG-80802/2021 | EPI_ISL_3892660 | 2021-09-02      |
| hCoV-19/Japan/PG-80803/2021 | EPI_ISL_3892662 | 2021-09-02      |
| hCoV-19/Japan/PG-80804/2021 | EPI_ISL_3892665 | 2021-09-02      |
| hCoV-19/Japan/PG-80805/2021 | EPI_ISL_3892666 | 2021-09-02      |
| hCoV-19/Japan/PG-80806/2021 | EPI_ISL_3892669 | 2021-09-02      |
| hCoV-19/Japan/PG-80807/2021 | EPI_ISL_3892671 | 2021-09-02      |
| hCoV-19/Japan/PG-80808/2021 | EPI_ISL_3892674 | 2021-09-02      |
| hCoV-19/Japan/PG-80809/2021 | EPI_ISL_3892676 | 2021-09-02      |
| hCoV-19/Japan/PG-80810/2021 | EPI_ISL_3892679 | 2021-09-02      |
| hCoV-19/Japan/PG-80811/2021 | EPI_ISL_3892682 | 2021-09-02      |
| hCoV-19/Japan/PG-80812/2021 | EPI_ISL_3892684 | 2021-09-02      |
| hCoV-19/Japan/PG-80813/2021 | EPI_ISL_3892687 | 2021-09-02      |
| hCoV-19/Japan/PG-80814/2021 | EPI_ISL_3892690 | 2021-09-02      |
| hCoV-19/Japan/PG-80815/2021 | EPI_ISL_3892693 | 2021-09-02      |
| hCoV-19/Japan/PG-80816/2021 | EPI_ISL_3892696 | 2021-09-02      |
| hCoV-19/Japan/PG-80817/2021 | EPI_ISL_3892698 | 2021-09-02      |
| hCoV-19/Japan/PG-80818/2021 | EPI_ISL_3892701 | 2021-09-02      |
| hCoV-19/Japan/PG-80819/2021 | EPI_ISL_3892704 | 2021-09-02      |
| hCoV-19/Japan/PG-80820/2021 | EPI_ISL_3892706 | 2021-09-02      |
| hCoV-19/Japan/PG-80821/2021 | EPI_ISL_3892709 | 2021-09-02      |
| hCoV-19/Japan/PG-80822/2021 | EPI_ISL_3892712 | 2021-09-02      |
| hCoV-19/Japan/PG-80823/2021 | EPI_ISL_3892714 | 2021-09-02      |
| hCoV-19/Japan/PG-80824/2021 | EPI_ISL_3892715 | 2021-09-02      |
| hCoV-19/Japan/PG-80825/2021 | EPI_ISL_3892717 | 2021-09-02      |
| hCoV-19/Japan/PG-80826/2021 | EPI_ISL_3892719 | 2021-09-02      |
| hCoV-19/Japan/PG-80827/2021 | EPI_ISL_3892721 | 2021-09-02      |
| hCoV-19/Japan/PG-80828/2021 | EPI_ISL_3892724 | 2021-09-02      |
| hCoV-19/Japan/PG-80829/2021 | EPI_ISL_3892727 | 2021-09-02      |
| hCoV-19/Japan/PG-80830/2021 | EPI_ISL_3892730 | 2021-09-02      |
| hCoV-19/Japan/PG-80831/2021 | EPI_ISL_3892733 | 2021-09-02      |
| hCoV-19/Japan/PG-80832/2021 | EPI_ISL_3892736 | 2021-09-02      |
| hCoV-19/Japan/PG-80833/2021 | EPI_ISL_3892738 | 2021-09-02      |
| hCoV-19/Japan/PG-80834/2021 | EPI_ISL_3892741 | 2021-09-02      |
| hCoV-19/Japan/PG-80835/2021 | EPI_ISL_3892744 | 2021-09-02      |
| hCoV-19/Japan/PG-80836/2021 | EPI_ISL_3892747 | 2021-09-02      |
| hCoV-19/Japan/PG-80837/2021 | EPI_ISL_3892750 | 2021-09-02      |
| hCoV-19/Japan/PG-80838/2021 | EPI_ISL_3892753 | 2021-09-02      |
| hCoV-19/Japan/PG-80839/2021 | EPI_ISL_3892756 | 2021-09-02      |
| hCoV-19/Japan/PG-80840/2021 | EPI_ISL_3892759 | 2021-09-02      |
| hCoV-19/Japan/PG-80841/2021 | EPI_ISL_3892762 | 2021-09-02      |
| hCoV-19/Japan/PG-80842/2021 | EPI_ISL_3892765 | 2021-09-02      |
| hCoV-19/Japan/PG-80843/2021 | EPI_ISL_3892767 | 2021-09-02      |
| hCoV-19/Japan/PG-80844/2021 | EPI_ISL_3892770 | 2021-09-02      |
| hCoV-19/Japan/PG-80845/2021 | EPI_ISL_3892772 | 2021-09-02      |
| hCoV-19/Japan/PG-80846/2021 | EPI_ISL_3892775 | 2021-09-02      |
| hCoV-19/Japan/PG-80847/2021 | EPI_ISL_3892778 | 2021-09-02      |
| hCoV-19/Japan/PG-80848/2021 | EPI_ISL_3892781 | 2021-09-02      |
| hCoV-19/Japan/PG-80849/2021 | EPI_ISL_3892786 | 2021-09-02      |
| hCoV-19/Japan/PG-80850/2021 | EPI_ISL_3892789 | 2021-09-02      |
| hCoV-19/Japan/PG-80851/2021 | EPI_ISL_3892792 | 2021-09-02      |

| virus_name                  | epiID           | submission_date |
|-----------------------------|-----------------|-----------------|
| hCoV-19/Japan/PG-80852/2021 | EPI_ISL_3892795 | 2021-09-02      |
| hCoV-19/Japan/PG-80853/2021 | EPI_ISL_3892798 | 2021-09-02      |
| hCoV-19/Japan/PG-80854/2021 | EPI_ISL_3892800 | 2021-09-02      |
| hCoV-19/Japan/PG-80855/2021 | EPI_ISL_3892803 | 2021-09-02      |
| hCoV-19/Japan/PG-80856/2021 | EPI_ISL_3892806 | 2021-09-02      |
| hCoV-19/Japan/PG-80857/2021 | EPI_ISL_3892809 | 2021-09-02      |
| hCoV-19/Japan/PG-80858/2021 | EPI_ISL_3892812 | 2021-09-02      |
| hCoV-19/Japan/PG-80859/2021 | EPI_ISL_3892815 | 2021-09-02      |
| hCoV-19/Japan/PG-80860/2021 | EPI_ISL_3892818 | 2021-09-02      |
| hCoV-19/Japan/PG-80861/2021 | EPI_ISL_3892822 | 2021-09-02      |
| hCoV-19/Japan/PG-80862/2021 | EPI_ISL_3892824 | 2021-09-02      |
| hCoV-19/Japan/PG-80863/2021 | EPI_ISL_3892826 | 2021-09-02      |
| hCoV-19/Japan/PG-80864/2021 | EPI_ISL_3892827 | 2021-09-02      |
| hCoV-19/Japan/PG-80865/2021 | EPI_ISL_3892828 | 2021-09-02      |
| hCoV-19/Japan/PG-80866/2021 | EPI_ISL_3892830 | 2021-09-02      |
| hCoV-19/Japan/PG-80867/2021 | EPI_ISL_3892832 | 2021-09-02      |
| hCoV-19/Japan/PG-80868/2021 | EPI_ISL_3892833 | 2021-09-02      |
| hCoV-19/Japan/PG-80869/2021 | EPI_ISL_3892835 | 2021-09-02      |
| hCoV-19/Japan/PG-80870/2021 | EPI_ISL_3892838 | 2021-09-02      |
| hCoV-19/Japan/PG-80871/2021 | EPI_ISL_3892841 | 2021-09-02      |
| hCoV-19/Japan/PG-80872/2021 | EPI_ISL_3892844 | 2021-09-02      |
| hCoV-19/Japan/PG-80873/2021 | EPI_ISL_3892845 | 2021-09-02      |
| hCoV-19/Japan/PG-80874/2021 | EPI_ISL_3892847 | 2021-09-02      |
| hCoV-19/Japan/PG-80875/2021 | EPI_ISL_3892849 | 2021-09-02      |
| hCoV-19/Japan/PG-80876/2021 | EPI_ISL_3892852 | 2021-09-02      |
| hCoV-19/Japan/PG-80877/2021 | EPI_ISL_3892855 | 2021-09-02      |
| hCoV-19/Japan/PG-80878/2021 | EPI_ISL_3892857 | 2021-09-02      |
| hCoV-19/Japan/PG-80879/2021 | EPI_ISL_3892860 | 2021-09-02      |
| hCoV-19/Japan/PG-80880/2021 | EPI_ISL_3892862 | 2021-09-02      |
| hCoV-19/Japan/PG-80881/2021 | EPI_ISL_3892864 | 2021-09-02      |
| hCoV-19/Japan/PG-80882/2021 | EPI_ISL_3892866 | 2021-09-02      |
| hCoV-19/Japan/PG-80883/2021 | EPI_ISL_3892869 | 2021-09-02      |
| hCoV-19/Japan/PG-80884/2021 | EPI_ISL_3892871 | 2021-09-02      |
| hCoV-19/Japan/PG-80885/2021 | EPI_ISL_3892874 | 2021-09-02      |
| hCoV-19/Japan/PG-80886/2021 | EPI_ISL_3892876 | 2021-09-02      |
| hCoV-19/Japan/PG-80887/2021 | EPI_ISL_3892879 | 2021-09-02      |
| hCoV-19/Japan/PG-80888/2021 | EPI_ISL_3892882 | 2021-09-02      |
| hCoV-19/Japan/PG-80889/2021 | EPI_ISL_3892885 | 2021-09-02      |
| hCoV-19/Japan/PG-80890/2021 | EPI_ISL_3892887 | 2021-09-02      |
| hCoV-19/Japan/PG-80891/2021 | EPI_ISL_3892889 | 2021-09-02      |
| hCoV-19/Japan/PG-80892/2021 | EPI_ISL_3892891 | 2021-09-02      |
| hCoV-19/Japan/PG-80893/2021 | EPI_ISL_3892892 | 2021-09-02      |
| hCoV-19/Japan/PG-80894/2021 | EPI_ISL_3892893 | 2021-09-02      |
| hCoV-19/Japan/PG-80895/2021 | EPI_ISL_3892894 | 2021-09-02      |
| hCoV-19/Japan/PG-80896/2021 | EPI_ISL_3892895 | 2021-09-02      |
| hCoV-19/Japan/PG-80897/2021 | EPI_ISL_3892897 | 2021-09-02      |
| hCoV-19/Japan/PG-80898/2021 | EPI_ISL_3892899 | 2021-09-02      |
| hCoV-19/Japan/PG-80899/2021 | EPI_ISL_3892901 | 2021-09-02      |
| hCoV-19/Japan/PG-80900/2021 | EPI_ISL_3892904 | 2021-09-02      |
| hCoV-19/Japan/PG-80901/2021 | EPI_ISL_3892906 | 2021-09-02      |
| hCoV-19/Japan/PG-80902/2021 | EPI_ISL_3892908 | 2021-09-02      |
| hCoV-19/Japan/PG-80903/2021 | EPI_ISL_3892911 | 2021-09-02      |
| hCoV-19/Japan/PG-80904/2021 | EPI_ISL_3892913 | 2021-09-02      |
| hCoV-19/Japan/PG-80905/2021 | EPI_ISL_3892916 | 2021-09-02      |

| virus_name                  | epiID           | submission_date |
|-----------------------------|-----------------|-----------------|
| hCoV-19/Japan/PG-80906/2021 | EPI_ISL_3892918 | 2021-09-02      |
| hCoV-19/Japan/PG-80907/2021 | EPI_ISL_3892920 | 2021-09-02      |
| hCoV-19/Japan/PG-80908/2021 | EPI_ISL_3892922 | 2021-09-02      |
| hCoV-19/Japan/PG-80909/2021 | EPI_ISL_3892924 | 2021-09-02      |
| hCoV-19/Japan/PG-80910/2021 | EPI_ISL_3892927 | 2021-09-02      |
| hCoV-19/Japan/PG-80911/2021 | EPI_ISL_3892929 | 2021-09-02      |
| hCoV-19/Japan/PG-80912/2021 | EPI_ISL_3892932 | 2021-09-02      |
| hCoV-19/Japan/PG-80913/2021 | EPI_ISL_3892935 | 2021-09-02      |
| hCoV-19/Japan/PG-80914/2021 | EPI_ISL_3892939 | 2021-09-02      |
| hCoV-19/Japan/PG-80915/2021 | EPI_ISL_3892941 | 2021-09-02      |
| hCoV-19/Japan/PG-80916/2021 | EPI_ISL_3892944 | 2021-09-02      |
| hCoV-19/Japan/PG-80917/2021 | EPI_ISL_3892947 | 2021-09-02      |
| hCoV-19/Japan/PG-80918/2021 | EPI_ISL_3892950 | 2021-09-02      |
| hCoV-19/Japan/PG-80919/2021 | EPI_ISL_3892953 | 2021-09-02      |
| hCoV-19/Japan/PG-80920/2021 | EPI_ISL_3892957 | 2021-09-02      |
| hCoV-19/Japan/PG-80921/2021 | EPI_ISL_3892960 | 2021-09-02      |
| hCoV-19/Japan/PG-80922/2021 | EPI_ISL_3892963 | 2021-09-02      |
| hCoV-19/Japan/PG-80923/2021 | EPI_ISL_3892967 | 2021-09-02      |
| hCoV-19/Japan/PG-80924/2021 | EPI_ISL_3892969 | 2021-09-02      |
| hCoV-19/Japan/PG-80925/2021 | EPI_ISL_3892971 | 2021-09-02      |
| hCoV-19/Japan/PG-80926/2021 | EPI_ISL_3892972 | 2021-09-02      |
| hCoV-19/Japan/PG-80927/2021 | EPI_ISL_3892975 | 2021-09-02      |
| hCoV-19/Japan/PG-80928/2021 | EPI_ISL_3892977 | 2021-09-02      |
| hCoV-19/Japan/PG-80929/2021 | EPI_ISL_3892980 | 2021-09-02      |
| hCoV-19/Japan/PG-80930/2021 | EPI_ISL_3892982 | 2021-09-02      |
| hCoV-19/Japan/PG-80931/2021 | EPI_ISL_3892985 | 2021-09-02      |
| hCoV-19/Japan/PG-80932/2021 | EPI_ISL_3892987 | 2021-09-02      |
| hCoV-19/Japan/PG-80933/2021 | EPI_ISL_3892990 | 2021-09-02      |
| hCoV-19/Japan/PG-80934/2021 | EPI_ISL_3892993 | 2021-09-02      |
| hCoV-19/Japan/PG-80935/2021 | EPI_ISL_3892996 | 2021-09-02      |
| hCoV-19/Japan/PG-80936/2021 | EPI_ISL_3892999 | 2021-09-02      |
| hCoV-19/Japan/PG-80937/2021 | EPI_ISL_3893002 | 2021-09-02      |
| hCoV-19/Japan/PG-80938/2021 | EPI_ISL_3893004 | 2021-09-02      |
| hCoV-19/Japan/PG-80939/2021 | EPI_ISL_3893007 | 2021-09-02      |
| hCoV-19/Japan/PG-80940/2021 | EPI_ISL_3893010 | 2021-09-02      |
| hCoV-19/Japan/PG-80941/2021 | EPI_ISL_3893012 | 2021-09-02      |
| hCoV-19/Japan/PG-80942/2021 | EPI_ISL_3893014 | 2021-09-02      |
| hCoV-19/Japan/PG-80943/2021 | EPI_ISL_3893017 | 2021-09-02      |
| hCoV-19/Japan/PG-80944/2021 | EPI_ISL_3893019 | 2021-09-02      |
| hCoV-19/Japan/PG-80945/2021 | EPI_ISL_3893021 | 2021-09-02      |
| hCoV-19/Japan/PG-80946/2021 | EPI_ISL_3893024 | 2021-09-02      |
| hCoV-19/Japan/PG-80947/2021 | EPI_ISL_3893026 | 2021-09-02      |
| hCoV-19/Japan/PG-80948/2021 | EPI_ISL_3893029 | 2021-09-02      |
| hCoV-19/Japan/PG-80949/2021 | EPI_ISL_3893032 | 2021-09-02      |
| hCoV-19/Japan/PG-80950/2021 | EPI_ISL_3893035 | 2021-09-02      |
| hCoV-19/Japan/PG-80951/2021 | EPI_ISL_3893037 | 2021-09-02      |
| hCoV-19/Japan/PG-80952/2021 | EPI_ISL_3893040 | 2021-09-02      |
| hCoV-19/Japan/PG-80953/2021 | EPI_ISL_3893042 | 2021-09-02      |
| hCoV-19/Japan/PG-80954/2021 | EPI_ISL_3893044 | 2021-09-02      |
| hCoV-19/Japan/PG-80955/2021 | EPI_ISL_3893047 | 2021-09-02      |
| hCoV-19/Japan/PG-80956/2021 | EPI_ISL_3893050 | 2021-09-02      |
| hCoV-19/Japan/PG-80957/2021 | EPI_ISL_3893052 | 2021-09-02      |
| hCoV-19/Japan/PG-80958/2021 | EPI_ISL_3893055 | 2021-09-02      |
| hCoV-19/Japan/PG-80959/2021 | EPI_ISL_3893058 | 2021-09-02      |

| virus_name                  | epiID           | submission_date |
|-----------------------------|-----------------|-----------------|
| hCoV-19/Japan/PG-80960/2021 | EPI_ISL_3893060 | 2021-09-02      |
| hCoV-19/Japan/PG-80961/2021 | EPI_ISL_3893063 | 2021-09-02      |
| hCoV-19/Japan/PG-80962/2021 | EPI_ISL_3893065 | 2021-09-02      |
| hCoV-19/Japan/PG-80963/2021 | EPI_ISL_3893068 | 2021-09-02      |
| hCoV-19/Japan/PG-80964/2021 | EPI_ISL_3893072 | 2021-09-02      |
| hCoV-19/Japan/PG-80965/2021 | EPI_ISL_3893074 | 2021-09-02      |
| hCoV-19/Japan/PG-80966/2021 | EPI_ISL_3893078 | 2021-09-02      |
| hCoV-19/Japan/PG-80967/2021 | EPI_ISL_3893080 | 2021-09-02      |
| hCoV-19/Japan/PG-80968/2021 | EPI_ISL_3893083 | 2021-09-02      |
| hCoV-19/Japan/PG-80969/2021 | EPI_ISL_3893087 | 2021-09-02      |
| hCoV-19/Japan/PG-80970/2021 | EPI_ISL_3893090 | 2021-09-02      |
| hCoV-19/Japan/PG-80971/2021 | EPI_ISL_3893093 | 2021-09-02      |
| hCoV-19/Japan/PG-80972/2021 | EPI_ISL_3893096 | 2021-09-02      |
| hCoV-19/Japan/PG-80973/2021 | EPI_ISL_3893098 | 2021-09-02      |
| hCoV-19/Japan/PG-80974/2021 | EPI_ISL_3893102 | 2021-09-02      |
| hCoV-19/Japan/PG-80975/2021 | EPI_ISL_3893105 | 2021-09-02      |
| hCoV-19/Japan/PG-80976/2021 | EPI_ISL_3893108 | 2021-09-02      |
| hCoV-19/Japan/PG-80977/2021 | EPI_ISL_3893111 | 2021-09-02      |
| hCoV-19/Japan/PG-80978/2021 | EPI_ISL_3893113 | 2021-09-02      |
| hCoV-19/Japan/PG-80979/2021 | EPI_ISL_3893116 | 2021-09-02      |
| hCoV-19/Japan/PG-80980/2021 | EPI_ISL_3893119 | 2021-09-02      |
| hCoV-19/Japan/PG-80981/2021 | EPI_ISL_3893121 | 2021-09-02      |
| hCoV-19/Japan/PG-80982/2021 | EPI_ISL_3893124 | 2021-09-02      |
| hCoV-19/Japan/PG-80983/2021 | EPI_ISL_3893127 | 2021-09-02      |
| hCoV-19/Japan/PG-80984/2021 | EPI_ISL_3893129 | 2021-09-02      |
| hCoV-19/Japan/PG-80985/2021 | EPI_ISL_3893132 | 2021-09-02      |
| hCoV-19/Japan/PG-80986/2021 | EPI_ISL_3893135 | 2021-09-02      |
| hCoV-19/Japan/PG-80987/2021 | EPI_ISL_3893138 | 2021-09-02      |
| hCoV-19/Japan/PG-80988/2021 | EPI_ISL_3893140 | 2021-09-02      |
| hCoV-19/Japan/PG-80989/2021 | EPI_ISL_3893143 | 2021-09-02      |
| hCoV-19/Japan/PG-80990/2021 | EPI_ISL_3893146 | 2021-09-02      |
| hCoV-19/Japan/PG-80991/2021 | EPI_ISL_3893148 | 2021-09-02      |
| hCoV-19/Japan/PG-80992/2021 | EPI_ISL_3893151 | 2021-09-02      |
| hCoV-19/Japan/PG-80993/2021 | EPI_ISL_3893155 | 2021-09-02      |
| hCoV-19/Japan/PG-80994/2021 | EPI_ISL_3893158 | 2021-09-02      |
| hCoV-19/Japan/PG-80995/2021 | EPI_ISL_3893161 | 2021-09-02      |
| hCoV-19/Japan/PG-80996/2021 | EPI_ISL_3893163 | 2021-09-02      |
| hCoV-19/Japan/PG-80997/2021 | EPI_ISL_3893166 | 2021-09-02      |
| hCoV-19/Japan/PG-80998/2021 | EPI_ISL_3893169 | 2021-09-02      |
| hCoV-19/Japan/PG-80999/2021 | EPI_ISL_3893172 | 2021-09-02      |
| hCoV-19/Japan/PG-81000/2021 | EPI_ISL_3893175 | 2021-09-02      |
| hCoV-19/Japan/PG-81001/2021 | EPI_ISL_3893177 | 2021-09-02      |
| hCoV-19/Japan/PG-81002/2021 | EPI_ISL_3893180 | 2021-09-02      |
| hCoV-19/Japan/PG-81003/2021 | EPI_ISL_3893183 | 2021-09-02      |
| hCoV-19/Japan/PG-81004/2021 | EPI_ISL_3893184 | 2021-09-02      |
| hCoV-19/Japan/PG-81005/2021 | EPI_ISL_3893185 | 2021-09-02      |
| hCoV-19/Japan/PG-81006/2021 | EPI_ISL_3893187 | 2021-09-02      |
| hCoV-19/Japan/PG-81007/2021 | EPI_ISL_3893189 | 2021-09-02      |
| hCoV-19/Japan/PG-81008/2021 | EPI_ISL_3893192 | 2021-09-02      |
| hCoV-19/Japan/PG-81009/2021 | EPI_ISL_3893195 | 2021-09-02      |
| hCoV-19/Japan/PG-81010/2021 | EPI_ISL_3893198 | 2021-09-02      |
| hCoV-19/Japan/PG-81011/2021 | EPI_ISL_3893200 | 2021-09-02      |
| hCoV-19/Japan/PG-81012/2021 | EPI_ISL_3893203 | 2021-09-02      |
| hCoV-19/Japan/PG-81013/2021 | EPI_ISL_3893206 | 2021-09-02      |

| virus_name                  | epiID           | submission_date |
|-----------------------------|-----------------|-----------------|
| hCoV-19/Japan/PG-81014/2021 | EPI_ISL_3893209 | 2021-09-02      |
| hCoV-19/Japan/PG-81015/2021 | EPI_ISL_3893211 | 2021-09-02      |
| hCoV-19/Japan/PG-81016/2021 | EPI_ISL_3893214 | 2021-09-02      |
| hCoV-19/Japan/PG-81017/2021 | EPI_ISL_3893217 | 2021-09-02      |
| hCoV-19/Japan/PG-81018/2021 | EPI_ISL_3893222 | 2021-09-02      |
| hCoV-19/Japan/PG-81019/2021 | EPI_ISL_3893227 | 2021-09-02      |
| hCoV-19/Japan/PG-81020/2021 | EPI_ISL_3893230 | 2021-09-02      |
| hCoV-19/Japan/PG-81021/2021 | EPI_ISL_3893234 | 2021-09-02      |
| hCoV-19/Japan/PG-81022/2021 | EPI_ISL_3893238 | 2021-09-02      |
| hCoV-19/Japan/PG-81023/2021 | EPI_ISL_3893244 | 2021-09-02      |
| hCoV-19/Japan/PG-81024/2021 | EPI_ISL_3893249 | 2021-09-02      |
| hCoV-19/Japan/PG-81025/2021 | EPI_ISL_3893254 | 2021-09-02      |
| hCoV-19/Japan/PG-81026/2021 | EPI_ISL_3893260 | 2021-09-02      |
| hCoV-19/Japan/PG-81027/2021 | EPI_ISL_3893264 | 2021-09-02      |
| hCoV-19/Japan/PG-81028/2021 | EPI_ISL_3893269 | 2021-09-02      |
| hCoV-19/Japan/PG-81029/2021 | EPI_ISL_3893273 | 2021-09-02      |
| hCoV-19/Japan/PG-81030/2021 | EPI_ISL_3893276 | 2021-09-02      |
| hCoV-19/Japan/PG-81031/2021 | EPI_ISL_3893278 | 2021-09-02      |
| hCoV-19/Japan/PG-81032/2021 | EPI_ISL_3893280 | 2021-09-02      |
| hCoV-19/Japan/PG-81033/2021 | EPI_ISL_3893283 | 2021-09-02      |
| hCoV-19/Japan/PG-81034/2021 | EPI_ISL_3893285 | 2021-09-02      |
| hCoV-19/Japan/PG-81035/2021 | EPI_ISL_3893288 | 2021-09-02      |
| hCoV-19/Japan/PG-81036/2021 | EPI_ISL_3893291 | 2021-09-02      |
| hCoV-19/Japan/PG-81037/2021 | EPI_ISL_3893293 | 2021-09-02      |
| hCoV-19/Japan/PG-81038/2021 | EPI_ISL_3893296 | 2021-09-02      |
| hCoV-19/Japan/PG-81039/2021 | EPI_ISL_3893299 | 2021-09-02      |
| hCoV-19/Japan/PG-81040/2021 | EPI_ISL_3893302 | 2021-09-02      |
| hCoV-19/Japan/PG-81041/2021 | EPI_ISL_3893305 | 2021-09-02      |
| hCoV-19/Japan/PG-81042/2021 | EPI_ISL_3893308 | 2021-09-02      |
| hCoV-19/Japan/PG-81043/2021 | EPI_ISL_3893310 | 2021-09-02      |
| hCoV-19/Japan/PG-81044/2021 | EPI_ISL_3893313 | 2021-09-02      |
| hCoV-19/Japan/PG-81045/2021 | EPI_ISL_3893316 | 2021-09-02      |
| hCoV-19/Japan/PG-81046/2021 | EPI_ISL_3893318 | 2021-09-02      |
| hCoV-19/Japan/PG-81047/2021 | EPI_ISL_3893321 | 2021-09-02      |
| hCoV-19/Japan/PG-81048/2021 | EPI_ISL_3893324 | 2021-09-02      |
| hCoV-19/Japan/PG-81049/2021 | EPI_ISL_3893327 | 2021-09-02      |
| hCoV-19/Japan/PG-81050/2021 | EPI_ISL_3893330 | 2021-09-02      |
| hCoV-19/Japan/PG-81051/2021 | EPI_ISL_3893333 | 2021-09-02      |
| hCoV-19/Japan/PG-81052/2021 | EPI_ISL_3893335 | 2021-09-02      |
| hCoV-19/Japan/PG-81053/2021 | EPI_ISL_3893338 | 2021-09-02      |
| hCoV-19/Japan/PG-81054/2021 | EPI_ISL_3893341 | 2021-09-02      |
| hCoV-19/Japan/PG-81055/2021 | EPI_ISL_3893343 | 2021-09-02      |
| hCoV-19/Japan/PG-81056/2021 | EPI_ISL_3893345 | 2021-09-02      |
| hCoV-19/Japan/PG-81057/2021 | EPI_ISL_3893346 | 2021-09-02      |
| hCoV-19/Japan/PG-81058/2021 | EPI_ISL_3893349 | 2021-09-02      |
| hCoV-19/Japan/PG-81059/2021 | EPI_ISL_3893350 | 2021-09-02      |
| hCoV-19/Japan/PG-81060/2021 | EPI_ISL_3893351 | 2021-09-02      |
| hCoV-19/Japan/PG-81061/2021 | EPI_ISL_3893353 | 2021-09-02      |
| hCoV-19/Japan/PG-81062/2021 | EPI_ISL_3893355 | 2021-09-02      |
| hCoV-19/Japan/PG-81063/2021 | EPI_ISL_3893358 | 2021-09-02      |
| hCoV-19/Japan/PG-81064/2021 | EPI_ISL_3893360 | 2021-09-02      |
| hCoV-19/Japan/PG-81065/2021 | EPI_ISL_3893363 | 2021-09-02      |
| hCoV-19/Japan/PG-81066/2021 | EPI_ISL_3893366 | 2021-09-02      |
| hCoV-19/Japan/PG-81067/2021 | EPI_ISL_3893369 | 2021-09-02      |

| virus_name                  | epiID           | submission_date |
|-----------------------------|-----------------|-----------------|
| hCoV-19/Japan/PG-81068/2021 | EPI_ISL_3893372 | 2021-09-02      |
| hCoV-19/Japan/PG-81069/2021 | EPI_ISL_3893374 | 2021-09-02      |
| hCoV-19/Japan/PG-81070/2021 | EPI_ISL_3893377 | 2021-09-02      |
| hCoV-19/Japan/PG-81071/2021 | EPI_ISL_3893379 | 2021-09-02      |
| hCoV-19/Japan/PG-81072/2021 | EPI_ISL_3893383 | 2021-09-02      |
| hCoV-19/Japan/PG-81073/2021 | EPI_ISL_3893385 | 2021-09-02      |
| hCoV-19/Japan/PG-81074/2021 | EPI_ISL_3893388 | 2021-09-02      |
| hCoV-19/Japan/PG-81075/2021 | EPI_ISL_3893391 | 2021-09-02      |
| hCoV-19/Japan/PG-81076/2021 | EPI_ISL_3893394 | 2021-09-02      |
| hCoV-19/Japan/PG-81077/2021 | EPI_ISL_3893397 | 2021-09-02      |
| hCoV-19/Japan/PG-81078/2021 | EPI_ISL_3893399 | 2021-09-02      |
| hCoV-19/Japan/PG-81079/2021 | EPI_ISL_3893401 | 2021-09-02      |
| hCoV-19/Japan/PG-81080/2021 | EPI_ISL_3893404 | 2021-09-02      |
| hCoV-19/Japan/PG-81081/2021 | EPI_ISL_3893406 | 2021-09-02      |
| hCoV-19/Japan/PG-81082/2021 | EPI_ISL_3893409 | 2021-09-02      |
| hCoV-19/Japan/PG-81083/2021 | EPI_ISL_3893412 | 2021-09-02      |
| hCoV-19/Japan/PG-81084/2021 | EPI_ISL_3893413 | 2021-09-02      |
| hCoV-19/Japan/PG-81085/2021 | EPI_ISL_3893416 | 2021-09-02      |
| hCoV-19/Japan/PG-81086/2021 | EPI_ISL_3893419 | 2021-09-02      |
| hCoV-19/Japan/PG-81087/2021 | EPI_ISL_3893421 | 2021-09-02      |
| hCoV-19/Japan/PG-81088/2021 | EPI_ISL_3893425 | 2021-09-02      |
| hCoV-19/Japan/PG-81089/2021 | EPI_ISL_3893427 | 2021-09-02      |
| hCoV-19/Japan/PG-81090/2021 | EPI_ISL_3893430 | 2021-09-02      |
| hCoV-19/Japan/PG-81091/2021 | EPI_ISL_3893432 | 2021-09-02      |
| hCoV-19/Japan/PG-81092/2021 | EPI_ISL_3893435 | 2021-09-02      |
| hCoV-19/Japan/PG-81093/2021 | EPI_ISL_3893437 | 2021-09-02      |
| hCoV-19/Japan/PG-81094/2021 | EPI_ISL_3893439 | 2021-09-02      |
| hCoV-19/Japan/PG-81095/2021 | EPI_ISL_3893442 | 2021-09-02      |
| hCoV-19/Japan/PG-81096/2021 | EPI_ISL_3893445 | 2021-09-02      |
| hCoV-19/Japan/PG-81097/2021 | EPI_ISL_3893447 | 2021-09-02      |
| hCoV-19/Japan/PG-81098/2021 | EPI_ISL_3893450 | 2021-09-02      |
| hCoV-19/Japan/PG-81099/2021 | EPI_ISL_3893453 | 2021-09-02      |
| hCoV-19/Japan/PG-81100/2021 | EPI_ISL_3893456 | 2021-09-02      |
| hCoV-19/Japan/PG-81101/2021 | EPI_ISL_3893459 | 2021-09-02      |
| hCoV-19/Japan/PG-81102/2021 | EPI_ISL_3893461 | 2021-09-02      |
| hCoV-19/Japan/PG-81103/2021 | EPI_ISL_3893465 | 2021-09-02      |
| hCoV-19/Japan/PG-81104/2021 | EPI_ISL_3893467 | 2021-09-02      |
| hCoV-19/Japan/PG-81105/2021 | EPI_ISL_3893470 | 2021-09-02      |
| hCoV-19/Japan/PG-81106/2021 | EPI_ISL_3893473 | 2021-09-02      |
| hCoV-19/Japan/PG-81107/2021 | EPI_ISL_3893476 | 2021-09-02      |
| hCoV-19/Japan/PG-81108/2021 | EPI_ISL_3893479 | 2021-09-02      |
| hCoV-19/Japan/PG-81109/2021 | EPI_ISL_3893482 | 2021-09-02      |
| hCoV-19/Japan/PG-81110/2021 | EPI_ISL_3893485 | 2021-09-02      |
| hCoV-19/Japan/PG-81111/2021 | EPI_ISL_3893488 | 2021-09-02      |
| hCoV-19/Japan/PG-81112/2021 | EPI_ISL_3893490 | 2021-09-02      |
| hCoV-19/Japan/PG-81113/2021 | EPI_ISL_3893493 | 2021-09-02      |
| hCoV-19/Japan/PG-81114/2021 | EPI_ISL_3893496 | 2021-09-02      |
| hCoV-19/Japan/PG-81115/2021 | EPI_ISL_3893499 | 2021-09-02      |
| hCoV-19/Japan/PG-81116/2021 | EPI_ISL_3893502 | 2021-09-02      |
| hCoV-19/Japan/PG-81117/2021 | EPI_ISL_3893504 | 2021-09-02      |
| hCoV-19/Japan/PG-81118/2021 | EPI_ISL_3893507 | 2021-09-02      |
| hCoV-19/Japan/PG-81119/2021 | EPI_ISL_3893509 | 2021-09-02      |
| hCoV-19/Japan/PG-81120/2021 | EPI_ISL_3893512 | 2021-09-02      |
| hCoV-19/Japan/PG-81121/2021 | EPI_ISL_3893516 | 2021-09-02      |

| virus_name                  | epiID           | submission_date |
|-----------------------------|-----------------|-----------------|
| hCoV-19/Japan/PG-81122/2021 | EPI_ISL_3893518 | 2021-09-02      |
| hCoV-19/Japan/PG-81123/2021 | EPI_ISL_3893521 | 2021-09-02      |
| hCoV-19/Japan/PG-81124/2021 | EPI_ISL_3893525 | 2021-09-02      |
| hCoV-19/Japan/PG-81125/2021 | EPI_ISL_3893527 | 2021-09-02      |
| hCoV-19/Japan/PG-81126/2021 | EPI_ISL_3893532 | 2021-09-02      |
| hCoV-19/Japan/PG-81127/2021 | EPI_ISL_3893534 | 2021-09-02      |
| hCoV-19/Japan/PG-81128/2021 | EPI_ISL_3893538 | 2021-09-02      |
| hCoV-19/Japan/PG-81129/2021 | EPI_ISL_3893540 | 2021-09-02      |
| hCoV-19/Japan/PG-81130/2021 | EPI_ISL_3893544 | 2021-09-02      |
| hCoV-19/Japan/PG-81131/2021 | EPI_ISL_3893547 | 2021-09-02      |
| hCoV-19/Japan/PG-81132/2021 | EPI_ISL_3893550 | 2021-09-02      |
| hCoV-19/Japan/PG-81133/2021 | EPI_ISL_3893553 | 2021-09-02      |
| hCoV-19/Japan/PG-81134/2021 | EPI_ISL_3893556 | 2021-09-02      |
| hCoV-19/Japan/PG-81135/2021 | EPI_ISL_3893561 | 2021-09-02      |
| hCoV-19/Japan/PG-81136/2021 | EPI_ISL_3893562 | 2021-09-02      |
| hCoV-19/Japan/PG-81137/2021 | EPI_ISL_3893565 | 2021-09-02      |
| hCoV-19/Japan/PG-81138/2021 | EPI_ISL_3893568 | 2021-09-02      |
| hCoV-19/Japan/PG-81139/2021 | EPI_ISL_3893571 | 2021-09-02      |
| hCoV-19/Japan/PG-81140/2021 | EPI_ISL_3893575 | 2021-09-02      |
| hCoV-19/Japan/PG-81141/2021 | EPI_ISL_3893578 | 2021-09-02      |
| hCoV-19/Japan/PG-81142/2021 | EPI_ISL_3893583 | 2021-09-02      |
| hCoV-19/Japan/PG-81143/2021 | EPI_ISL_3893588 | 2021-09-02      |
| hCoV-19/Japan/PG-81144/2021 | EPI_ISL_3893592 | 2021-09-02      |
| hCoV-19/Japan/PG-81145/2021 | EPI_ISL_3893597 | 2021-09-02      |
| hCoV-19/Japan/PG-81146/2021 | EPI_ISL_3893600 | 2021-09-02      |
| hCoV-19/Japan/PG-81147/2021 | EPI_ISL_3893603 | 2021-09-02      |
| hCoV-19/Japan/PG-81148/2021 | EPI_ISL_3893607 | 2021-09-02      |
| hCoV-19/Japan/PG-81149/2021 | EPI_ISL_3893610 | 2021-09-02      |
| hCoV-19/Japan/PG-81150/2021 | EPI_ISL_3893614 | 2021-09-02      |
| hCoV-19/Japan/PG-81151/2021 | EPI_ISL_3893617 | 2021-09-02      |
| hCoV-19/Japan/PG-81152/2021 | EPI_ISL_3893622 | 2021-09-02      |
| hCoV-19/Japan/PG-81153/2021 | EPI_ISL_3893627 | 2021-09-02      |
| hCoV-19/Japan/PG-81154/2021 | EPI_ISL_3893631 | 2021-09-02      |
| hCoV-19/Japan/PG-81155/2021 | EPI_ISL_3893636 | 2021-09-02      |
| hCoV-19/Japan/PG-81156/2021 | EPI_ISL_3893641 | 2021-09-02      |
| hCoV-19/Japan/PG-81157/2021 | EPI_ISL_3893647 | 2021-09-02      |
| hCoV-19/Japan/PG-81158/2021 | EPI_ISL_3893652 | 2021-09-02      |
| hCoV-19/Japan/PG-81159/2021 | EPI_ISL_3893655 | 2021-09-02      |
| hCoV-19/Japan/PG-81160/2021 | EPI_ISL_3893658 | 2021-09-02      |
| hCoV-19/Japan/PG-81161/2021 | EPI_ISL_3893662 | 2021-09-02      |
| hCoV-19/Japan/PG-81162/2021 | EPI_ISL_3893665 | 2021-09-02      |
| hCoV-19/Japan/PG-81163/2021 | EPI_ISL_3893668 | 2021-09-02      |
| hCoV-19/Japan/PG-81164/2021 | EPI_ISL_3893670 | 2021-09-02      |
| hCoV-19/Japan/PG-81165/2021 | EPI_ISL_3893673 | 2021-09-02      |
| hCoV-19/Japan/PG-81166/2021 | EPI_ISL_3893676 | 2021-09-02      |
| hCoV-19/Japan/PG-81167/2021 | EPI_ISL_3893678 | 2021-09-02      |
| hCoV-19/Japan/PG-81168/2021 | EPI_ISL_3893681 | 2021-09-02      |
| hCoV-19/Japan/PG-81169/2021 | EPI_ISL_3893684 | 2021-09-02      |
| hCoV-19/Japan/PG-81170/2021 | EPI_ISL_3893687 | 2021-09-02      |
| hCoV-19/Japan/PG-81171/2021 | EPI_ISL_3893690 | 2021-09-02      |
| hCoV-19/Japan/PG-81172/2021 | EPI_ISL_3893692 | 2021-09-02      |
| hCoV-19/Japan/PG-81173/2021 | EPI_ISL_3893696 | 2021-09-02      |
| hCoV-19/Japan/PG-81174/2021 | EPI_ISL_3893698 | 2021-09-02      |
| hCoV-19/Japan/PG-81175/2021 | EPI_ISL_3893701 | 2021-09-02      |



| virus_name                  | epiID           | submission_date |
|-----------------------------|-----------------|-----------------|
| hCoV-19/Japan/PG-81176/2021 | EPI_ISL_3893704 | 2021-09-02      |
| hCoV-19/Japan/PG-81177/2021 | EPI_ISL_3893707 | 2021-09-02      |
| hCoV-19/Japan/PG-81178/2021 | EPI_ISL_3893709 | 2021-09-02      |
| hCoV-19/Japan/PG-81179/2021 | EPI_ISL_3893712 | 2021-09-02      |
| hCoV-19/Japan/PG-81180/2021 | EPI_ISL_3893713 | 2021-09-02      |
| hCoV-19/Japan/PG-81181/2021 | EPI_ISL_3893714 | 2021-09-02      |
| hCoV-19/Japan/PG-81182/2021 | EPI_ISL_3893715 | 2021-09-02      |
| hCoV-19/Japan/PG-81183/2021 | EPI_ISL_3893716 | 2021-09-02      |
| hCoV-19/Japan/PG-81184/2021 | EPI_ISL_3893717 | 2021-09-02      |
| hCoV-19/Japan/PG-81185/2021 | EPI_ISL_3893718 | 2021-09-02      |
| hCoV-19/Japan/PG-81186/2021 | EPI_ISL_3893719 | 2021-09-02      |
| hCoV-19/Japan/PG-81187/2021 | EPI_ISL_3893720 | 2021-09-02      |
| hCoV-19/Japan/PG-81188/2021 | EPI_ISL_3893721 | 2021-09-02      |
| hCoV-19/Japan/PG-81189/2021 | EPI_ISL_3893722 | 2021-09-02      |
| hCoV-19/Japan/PG-81190/2021 | EPI_ISL_3893723 | 2021-09-02      |
| hCoV-19/Japan/PG-81191/2021 | EPI_ISL_3893724 | 2021-09-02      |
| hCoV-19/Japan/PG-81192/2021 | EPI_ISL_3893725 | 2021-09-02      |
| hCoV-19/Japan/PG-81193/2021 | EPI_ISL_3893726 | 2021-09-02      |
| hCoV-19/Japan/PG-81194/2021 | EPI_ISL_3893727 | 2021-09-02      |
| hCoV-19/Japan/PG-81195/2021 | EPI_ISL_3893728 | 2021-09-02      |
| hCoV-19/Japan/PG-81196/2021 | EPI_ISL_3893729 | 2021-09-02      |
| hCoV-19/Japan/PG-81197/2021 | EPI_ISL_3893730 | 2021-09-02      |
| hCoV-19/Japan/PG-81198/2021 | EPI_ISL_3893731 | 2021-09-02      |
| hCoV-19/Japan/PG-81199/2021 | EPI_ISL_3893732 | 2021-09-02      |
| hCoV-19/Japan/PG-81200/2021 | EPI_ISL_3893733 | 2021-09-02      |
| hCoV-19/Japan/PG-81201/2021 | EPI_ISL_3893734 | 2021-09-02      |
| hCoV-19/Japan/PG-81202/2021 | EPI_ISL_3893735 | 2021-09-02      |
| hCoV-19/Japan/PG-81203/2021 | EPI_ISL_3893736 | 2021-09-02      |
| hCoV-19/Japan/PG-81204/2021 | EPI_ISL_3893737 | 2021-09-02      |
| hCoV-19/Japan/PG-81205/2021 | EPI_ISL_3893738 | 2021-09-02      |
| hCoV-19/Japan/PG-81206/2021 | EPI_ISL_3893739 | 2021-09-02      |
| hCoV-19/Japan/PG-81207/2021 | EPI_ISL_3893740 | 2021-09-02      |
| hCoV-19/Japan/PG-81208/2021 | EPI_ISL_3893741 | 2021-09-02      |
| hCoV-19/Japan/PG-81209/2021 | EPI_ISL_3893742 | 2021-09-02      |
| hCoV-19/Japan/PG-81210/2021 | EPI_ISL_3893743 | 2021-09-02      |
| hCoV-19/Japan/PG-81211/2021 | EPI_ISL_3893745 | 2021-09-02      |
| hCoV-19/Japan/PG-81212/2021 | EPI_ISL_3893746 | 2021-09-02      |
| hCoV-19/Japan/PG-81213/2021 | EPI_ISL_3893747 | 2021-09-02      |
| hCoV-19/Japan/PG-81214/2021 | EPI_ISL_3893749 | 2021-09-02      |
| hCoV-19/Japan/PG-81215/2021 | EPI_ISL_3893750 | 2021-09-02      |
| hCoV-19/Japan/PG-81216/2021 | EPI_ISL_3893752 | 2021-09-02      |
| hCoV-19/Japan/PG-81217/2021 | EPI_ISL_3893753 | 2021-09-02      |
| hCoV-19/Japan/PG-81218/2021 | EPI_ISL_3893754 | 2021-09-02      |
| hCoV-19/Japan/PG-81219/2021 | EPI_ISL_3873799 | 2021-09-02      |
| hCoV-19/Japan/PG-81220/2021 | EPI_ISL_3873800 | 2021-09-02      |
| hCoV-19/Japan/PG-81221/2021 | EPI_ISL_3873801 | 2021-09-02      |
| hCoV-19/Japan/PG-81222/2021 | EPI_ISL_3873802 | 2021-09-02      |
| hCoV-19/Japan/PG-81223/2021 | EPI_ISL_3873803 | 2021-09-02      |
| hCoV-19/Japan/PG-81224/2021 | EPI_ISL_3873804 | 2021-09-02      |
| hCoV-19/Japan/PG-81225/2021 | EPI_ISL_3873805 | 2021-09-02      |
| hCoV-19/Japan/PG-81226/2021 | EPI_ISL_3875883 | 2021-09-02      |
| hCoV-19/Japan/PG-81227/2021 | EPI_ISL_3875884 | 2021-09-02      |
| hCoV-19/Japan/PG-81228/2021 | EPI_ISL_3875885 | 2021-09-02      |
| hCoV-19/Japan/PG-81229/2021 | EPI_ISL_3875886 | 2021-09-02      |

| virus_name                  | epiID           | submission_date |
|-----------------------------|-----------------|-----------------|
| hCoV-19/Japan/PG-81230/2021 | EPI_ISL_3875887 | 2021-09-02      |
| hCoV-19/Japan/PG-81231/2021 | EPI_ISL_3875888 | 2021-09-02      |
| hCoV-19/Japan/PG-81232/2021 | EPI_ISL_3875889 | 2021-09-02      |
| hCoV-19/Japan/PG-81233/2021 | EPI_ISL_3875890 | 2021-09-02      |
| hCoV-19/Japan/PG-81234/2021 | EPI_ISL_3875891 | 2021-09-02      |
| hCoV-19/Japan/PG-81235/2021 | EPI_ISL_3875892 | 2021-09-02      |
| hCoV-19/Japan/PG-81236/2021 | EPI_ISL_3875893 | 2021-09-02      |
| hCoV-19/Japan/PG-81237/2021 | EPI_ISL_3875894 | 2021-09-02      |
| hCoV-19/Japan/PG-81238/2021 | EPI_ISL_3875895 | 2021-09-02      |
| hCoV-19/Japan/PG-81239/2021 | EPI_ISL_3875896 | 2021-09-02      |
| hCoV-19/Japan/PG-81240/2021 | EPI_ISL_3875897 | 2021-09-02      |
| hCoV-19/Japan/PG-81241/2021 | EPI_ISL_3875898 | 2021-09-02      |
| hCoV-19/Japan/PG-81242/2021 | EPI_ISL_3875899 | 2021-09-02      |
| hCoV-19/Japan/PG-81243/2021 | EPI_ISL_3875900 | 2021-09-02      |
| hCoV-19/Japan/PG-81244/2021 | EPI_ISL_3875901 | 2021-09-02      |
| hCoV-19/Japan/PG-81245/2021 | EPI_ISL_3875902 | 2021-09-02      |
| hCoV-19/Japan/PG-81246/2021 | EPI_ISL_3875903 | 2021-09-02      |
| hCoV-19/Japan/PG-81247/2021 | EPI_ISL_3875904 | 2021-09-02      |
| hCoV-19/Japan/PG-81248/2021 | EPI_ISL_3875905 | 2021-09-02      |
| hCoV-19/Japan/PG-81249/2021 | EPI_ISL_3870759 | 2021-09-02      |
| hCoV-19/Japan/PG-81250/2021 | EPI_ISL_3870760 | 2021-09-02      |
| hCoV-19/Japan/PG-81251/2021 | EPI_ISL_3870761 | 2021-09-02      |
| hCoV-19/Japan/PG-81252/2021 | EPI_ISL_3870762 | 2021-09-02      |
| hCoV-19/Japan/PG-81253/2021 | EPI_ISL_3870763 | 2021-09-02      |
| hCoV-19/Japan/PG-81254/2021 | EPI_ISL_3870764 | 2021-09-02      |
| hCoV-19/Japan/PG-81255/2021 | EPI_ISL_3870765 | 2021-09-02      |
| hCoV-19/Japan/PG-81256/2021 | EPI_ISL_3870766 | 2021-09-02      |
| hCoV-19/Japan/PG-81257/2021 | EPI_ISL_3870767 | 2021-09-02      |
| hCoV-19/Japan/PG-81258/2021 | EPI_ISL_3870768 | 2021-09-02      |
| hCoV-19/Japan/PG-81259/2021 | EPI_ISL_3870769 | 2021-09-02      |
| hCoV-19/Japan/PG-81260/2021 | EPI_ISL_3870770 | 2021-09-02      |
| hCoV-19/Japan/PG-81261/2021 | EPI_ISL_3870771 | 2021-09-02      |
| hCoV-19/Japan/PG-81262/2021 | EPI_ISL_3870772 | 2021-09-02      |
| hCoV-19/Japan/PG-81263/2021 | EPI_ISL_3870773 | 2021-09-02      |
| hCoV-19/Japan/PG-81264/2021 | EPI_ISL_3870774 | 2021-09-02      |
| hCoV-19/Japan/PG-81265/2021 | EPI_ISL_3870775 | 2021-09-02      |
| hCoV-19/Japan/PG-81266/2021 | EPI_ISL_3870776 | 2021-09-02      |
| hCoV-19/Japan/PG-81267/2021 | EPI_ISL_3870777 | 2021-09-02      |
| hCoV-19/Japan/PG-81268/2021 | EPI_ISL_3870778 | 2021-09-02      |
| hCoV-19/Japan/PG-81269/2021 | EPI_ISL_3870779 | 2021-09-02      |
| hCoV-19/Japan/PG-81270/2021 | EPI_ISL_3870780 | 2021-09-02      |
| hCoV-19/Japan/PG-81271/2021 | EPI_ISL_3870781 | 2021-09-02      |
| hCoV-19/Japan/PG-81272/2021 | EPI_ISL_3873468 | 2021-09-02      |
| hCoV-19/Japan/PG-81273/2021 | EPI_ISL_3873469 | 2021-09-02      |
| hCoV-19/Japan/PG-81274/2021 | EPI_ISL_3873470 | 2021-09-02      |
| hCoV-19/Japan/PG-81275/2021 | EPI_ISL_3873471 | 2021-09-02      |
| hCoV-19/Japan/PG-81276/2021 | EPI_ISL_3873472 | 2021-09-02      |
| hCoV-19/Japan/PG-81277/2021 | EPI_ISL_3873473 | 2021-09-02      |
| hCoV-19/Japan/PG-81278/2021 | EPI_ISL_3873474 | 2021-09-02      |
| hCoV-19/Japan/PG-81279/2021 | EPI_ISL_3873475 | 2021-09-02      |
| hCoV-19/Japan/PG-81280/2021 | EPI_ISL_3873476 | 2021-09-02      |
| hCoV-19/Japan/PG-81281/2021 | EPI_ISL_3873477 | 2021-09-02      |
| hCoV-19/Japan/PG-81282/2021 | EPI_ISL_3873478 | 2021-09-02      |
| hCoV-19/Japan/PG-81283/2021 | EPI_ISL_3873479 | 2021-09-02      |

| virus_name                  | epiID           | submission_date |
|-----------------------------|-----------------|-----------------|
| hCoV-19/Japan/PG-81284/2021 | EPI_ISL_3873480 | 2021-09-02      |
| hCoV-19/Japan/PG-81285/2021 | EPI_ISL_3873481 | 2021-09-02      |
| hCoV-19/Japan/PG-81286/2021 | EPI_ISL_3873482 | 2021-09-02      |
| hCoV-19/Japan/PG-81287/2021 | EPI_ISL_3873483 | 2021-09-02      |
| hCoV-19/Japan/PG-81288/2021 | EPI_ISL_3873484 | 2021-09-02      |
| hCoV-19/Japan/PG-81289/2021 | EPI_ISL_3873485 | 2021-09-02      |
| hCoV-19/Japan/PG-81290/2021 | EPI_ISL_3873486 | 2021-09-02      |
| hCoV-19/Japan/PG-81291/2021 | EPI_ISL_3872860 | 2021-09-02      |
| hCoV-19/Japan/PG-81292/2021 | EPI_ISL_3872861 | 2021-09-02      |
| hCoV-19/Japan/PG-81293/2021 | EPI_ISL_3872862 | 2021-09-02      |
| hCoV-19/Japan/PG-81294/2021 | EPI_ISL_3872863 | 2021-09-02      |
| hCoV-19/Japan/PG-81295/2021 | EPI_ISL_3872864 | 2021-09-02      |
| hCoV-19/Japan/PG-81296/2021 | EPI_ISL_3872865 | 2021-09-02      |
| hCoV-19/Japan/PG-81297/2021 | EPI_ISL_3872866 | 2021-09-02      |
| hCoV-19/Japan/PG-81298/2021 | EPI_ISL_3872867 | 2021-09-02      |
| hCoV-19/Japan/PG-81299/2021 | EPI_ISL_3872868 | 2021-09-02      |
| hCoV-19/Japan/PG-81300/2021 | EPI_ISL_3872869 | 2021-09-02      |
| hCoV-19/Japan/PG-81301/2021 | EPI_ISL_3872870 | 2021-09-02      |
| hCoV-19/Japan/PG-81302/2021 | EPI_ISL_3872871 | 2021-09-02      |
| hCoV-19/Japan/PG-81303/2021 | EPI_ISL_3872872 | 2021-09-02      |
| hCoV-19/Japan/PG-81304/2021 | EPI_ISL_3872873 | 2021-09-02      |
| hCoV-19/Japan/PG-81305/2021 | EPI_ISL_3872874 | 2021-09-02      |
| hCoV-19/Japan/PG-81306/2021 | EPI_ISL_3872875 | 2021-09-02      |
| hCoV-19/Japan/PG-81307/2021 | EPI_ISL_3872876 | 2021-09-02      |
| hCoV-19/Japan/PG-81308/2021 | EPI_ISL_3872877 | 2021-09-02      |
| hCoV-19/Japan/PG-81309/2021 | EPI_ISL_3872878 | 2021-09-02      |
| hCoV-19/Japan/PG-81310/2021 | EPI_ISL_3872879 | 2021-09-02      |
| hCoV-19/Japan/PG-81311/2021 | EPI_ISL_3872880 | 2021-09-02      |
| hCoV-19/Japan/PG-81312/2021 | EPI_ISL_3872881 | 2021-09-02      |
| hCoV-19/Japan/PG-81313/2021 | EPI_ISL_3872882 | 2021-09-02      |
| hCoV-19/Japan/PG-81314/2021 | EPI_ISL_3872883 | 2021-09-02      |
| hCoV-19/Japan/PG-81315/2021 | EPI_ISL_3872884 | 2021-09-02      |
| hCoV-19/Japan/PG-81316/2021 | EPI_ISL_3872885 | 2021-09-02      |
| hCoV-19/Japan/PG-81317/2021 | EPI_ISL_3872886 | 2021-09-02      |
| hCoV-19/Japan/PG-81318/2021 | EPI_ISL_3872887 | 2021-09-02      |
| hCoV-19/Japan/PG-81319/2021 | EPI_ISL_3872888 | 2021-09-02      |
| hCoV-19/Japan/PG-81320/2021 | EPI_ISL_3872889 | 2021-09-02      |
| hCoV-19/Japan/PG-81321/2021 | EPI_ISL_3872890 | 2021-09-02      |
| hCoV-19/Japan/PG-81322/2021 | EPI_ISL_3872891 | 2021-09-02      |
| hCoV-19/Japan/PG-81323/2021 | EPI_ISL_3872892 | 2021-09-02      |
| hCoV-19/Japan/PG-81324/2021 | EPI_ISL_3872893 | 2021-09-02      |
| hCoV-19/Japan/PG-81325/2021 | EPI_ISL_3872894 | 2021-09-02      |
| hCoV-19/Japan/PG-81326/2021 | EPI_ISL_3872895 | 2021-09-02      |
| hCoV-19/Japan/PG-81327/2021 | EPI_ISL_3872896 | 2021-09-02      |
| hCoV-19/Japan/PG-81328/2021 | EPI_ISL_3872897 | 2021-09-02      |
| hCoV-19/Japan/PG-81329/2021 | EPI_ISL_3872898 | 2021-09-02      |
| hCoV-19/Japan/PG-81330/2021 | EPI_ISL_3872899 | 2021-09-02      |
| hCoV-19/Japan/PG-81331/2021 | EPI_ISL_3872900 | 2021-09-02      |
| hCoV-19/Japan/PG-81332/2021 | EPI_ISL_3872901 | 2021-09-02      |
| hCoV-19/Japan/PG-81333/2021 | EPI_ISL_3872902 | 2021-09-02      |
| hCoV-19/Japan/PG-81334/2021 | EPI_ISL_3872903 | 2021-09-02      |
| hCoV-19/Japan/PG-81335/2021 | EPI_ISL_3872904 | 2021-09-02      |
| hCoV-19/Japan/PG-81336/2021 | EPI_ISL_3872905 | 2021-09-02      |
| hCoV-19/Japan/PG-81337/2021 | EPI_ISL_3872906 | 2021-09-02      |

| virus_name                  | epiID           | submission_date |
|-----------------------------|-----------------|-----------------|
| hCoV-19/Japan/PG-81338/2021 | EPI_ISL_3872907 | 2021-09-02      |
| hCoV-19/Japan/PG-81339/2021 | EPI_ISL_3872908 | 2021-09-02      |
| hCoV-19/Japan/PG-81340/2021 | EPI_ISL_3872909 | 2021-09-02      |
| hCoV-19/Japan/PG-81341/2021 | EPI_ISL_3872910 | 2021-09-02      |
| hCoV-19/Japan/PG-81342/2021 | EPI_ISL_3872911 | 2021-09-02      |
| hCoV-19/Japan/PG-81343/2021 | EPI_ISL_3872912 | 2021-09-02      |
| hCoV-19/Japan/PG-81344/2021 | EPI_ISL_3872913 | 2021-09-02      |
| hCoV-19/Japan/PG-81345/2021 | EPI_ISL_3872914 | 2021-09-02      |
| hCoV-19/Japan/PG-81346/2021 | EPI_ISL_3872915 | 2021-09-02      |
| hCoV-19/Japan/PG-81347/2021 | EPI_ISL_3872916 | 2021-09-02      |
| hCoV-19/Japan/PG-81348/2021 | EPI_ISL_3872917 | 2021-09-02      |
| hCoV-19/Japan/PG-81349/2021 | EPI_ISL_3872918 | 2021-09-02      |
| hCoV-19/Japan/PG-81350/2021 | EPI_ISL_3872919 | 2021-09-02      |
| hCoV-19/Japan/PG-81351/2021 | EPI_ISL_3872920 | 2021-09-02      |
| hCoV-19/Japan/PG-81352/2021 | EPI_ISL_3872921 | 2021-09-02      |
| hCoV-19/Japan/PG-81353/2021 | EPI_ISL_3872922 | 2021-09-02      |
| hCoV-19/Japan/PG-81354/2021 | EPI_ISL_3872923 | 2021-09-02      |
| hCoV-19/Japan/PG-81355/2021 | EPI_ISL_3872924 | 2021-09-02      |
| hCoV-19/Japan/PG-81356/2021 | EPI_ISL_3872925 | 2021-09-02      |
| hCoV-19/Japan/PG-81357/2021 | EPI_ISL_3872926 | 2021-09-02      |
| hCoV-19/Japan/PG-81358/2021 | EPI_ISL_3872927 | 2021-09-02      |
| hCoV-19/Japan/PG-81359/2021 | EPI_ISL_3872928 | 2021-09-02      |
| hCoV-19/Japan/PG-81360/2021 | EPI_ISL_3872929 | 2021-09-02      |
| hCoV-19/Japan/PG-81361/2021 | EPI_ISL_3872930 | 2021-09-02      |
| hCoV-19/Japan/PG-81362/2021 | EPI_ISL_3872931 | 2021-09-02      |
| hCoV-19/Japan/PG-81363/2021 | EPI_ISL_3872932 | 2021-09-02      |
| hCoV-19/Japan/PG-81364/2021 | EPI_ISL_3872933 | 2021-09-02      |
| hCoV-19/Japan/PG-81365/2021 | EPI_ISL_3872934 | 2021-09-02      |
| hCoV-19/Japan/PG-81366/2021 | EPI_ISL_3872935 | 2021-09-02      |
| hCoV-19/Japan/PG-81367/2021 | EPI_ISL_3872936 | 2021-09-02      |
| hCoV-19/Japan/PG-81368/2021 | EPI_ISL_3872937 | 2021-09-02      |
| hCoV-19/Japan/PG-81369/2021 | EPI_ISL_3872938 | 2021-09-02      |
| hCoV-19/Japan/PG-81370/2021 | EPI_ISL_3872939 | 2021-09-02      |
| hCoV-19/Japan/PG-81371/2021 | EPI_ISL_3872940 | 2021-09-02      |
| hCoV-19/Japan/PG-81372/2021 | EPI_ISL_3872941 | 2021-09-02      |
| hCoV-19/Japan/PG-81373/2021 | EPI_ISL_3871634 | 2021-09-02      |
| hCoV-19/Japan/PG-81374/2021 | EPI_ISL_3871635 | 2021-09-02      |
| hCoV-19/Japan/PG-81375/2021 | EPI_ISL_3871636 | 2021-09-02      |
| hCoV-19/Japan/PG-81376/2021 | EPI_ISL_3871637 | 2021-09-02      |
| hCoV-19/Japan/PG-81377/2021 | EPI_ISL_3871638 | 2021-09-02      |
| hCoV-19/Japan/PG-81378/2021 | EPI_ISL_3871639 | 2021-09-02      |
| hCoV-19/Japan/PG-81379/2021 | EPI_ISL_3871640 | 2021-09-02      |
| hCoV-19/Japan/PG-81384/2021 | EPI_ISL_3872302 | 2021-09-02      |
| hCoV-19/Japan/PG-81385/2021 | EPI_ISL_3872303 | 2021-09-02      |
| hCoV-19/Japan/PG-81386/2021 | EPI_ISL_3872304 | 2021-09-02      |
| hCoV-19/Japan/PG-81387/2021 | EPI_ISL_3872305 | 2021-09-02      |
| hCoV-19/Japan/PG-81388/2021 | EPI_ISL_3872306 | 2021-09-02      |
| hCoV-19/Japan/PG-81389/2021 | EPI_ISL_3872307 | 2021-09-02      |
| hCoV-19/Japan/PG-81390/2021 | EPI_ISL_3872308 | 2021-09-02      |
| hCoV-19/Japan/PG-81391/2021 | EPI_ISL_3872309 | 2021-09-02      |
| hCoV-19/Japan/PG-81392/2021 | EPI_ISL_3872310 | 2021-09-02      |
| hCoV-19/Japan/PG-81393/2021 | EPI_ISL_3872311 | 2021-09-02      |
| hCoV-19/Japan/PG-81394/2021 | EPI_ISL_3893756 | 2021-09-02      |
| hCoV-19/Japan/PG-81395/2021 | EPI_ISL_3893757 | 2021-09-02      |

| virus_name                  | epiID           | submission_date |
|-----------------------------|-----------------|-----------------|
| hCoV-19/Japan/PG-81396/2021 | EPI_ISL_3893758 | 2021-09-02      |
| hCoV-19/Japan/PG-81397/2021 | EPI_ISL_3893759 | 2021-09-02      |
| hCoV-19/Japan/PG-81398/2021 | EPI_ISL_3893760 | 2021-09-02      |
| hCoV-19/Japan/PG-81399/2021 | EPI_ISL_3893761 | 2021-09-02      |
| hCoV-19/Japan/PG-81400/2021 | EPI_ISL_3893762 | 2021-09-02      |
| hCoV-19/Japan/PG-81401/2021 | EPI_ISL_3893763 | 2021-09-02      |
| hCoV-19/Japan/PG-81402/2021 | EPI_ISL_3893764 | 2021-09-02      |
| hCoV-19/Japan/PG-81403/2021 | EPI_ISL_3893765 | 2021-09-02      |
| hCoV-19/Japan/PG-81404/2021 | EPI_ISL_3893766 | 2021-09-02      |
| hCoV-19/Japan/PG-81405/2021 | EPI_ISL_3893767 | 2021-09-02      |
| hCoV-19/Japan/PG-81406/2021 | EPI_ISL_3893768 | 2021-09-02      |
| hCoV-19/Japan/PG-81407/2021 | EPI_ISL_3893769 | 2021-09-02      |
| hCoV-19/Japan/PG-81408/2021 | EPI_ISL_3893770 | 2021-09-02      |
| hCoV-19/Japan/PG-81409/2021 | EPI_ISL_3893771 | 2021-09-02      |
| hCoV-19/Japan/PG-81410/2021 | EPI_ISL_3893772 | 2021-09-02      |
| hCoV-19/Japan/PG-81411/2021 | EPI_ISL_3893773 | 2021-09-02      |
| hCoV-19/Japan/PG-81412/2021 | EPI_ISL_3893774 | 2021-09-02      |
| hCoV-19/Japan/PG-81413/2021 | EPI_ISL_3893775 | 2021-09-02      |
| hCoV-19/Japan/PG-81414/2021 | EPI_ISL_3893776 | 2021-09-02      |
| hCoV-19/Japan/PG-81415/2021 | EPI_ISL_3893777 | 2021-09-02      |
| hCoV-19/Japan/PG-81416/2021 | EPI_ISL_3893778 | 2021-09-02      |
| hCoV-19/Japan/PG-81417/2021 | EPI_ISL_3893779 | 2021-09-02      |
| hCoV-19/Japan/PG-81418/2021 | EPI_ISL_3893780 | 2021-09-02      |
| hCoV-19/Japan/PG-81419/2021 | EPI_ISL_3893781 | 2021-09-02      |
| hCoV-19/Japan/PG-81420/2021 | EPI_ISL_3893782 | 2021-09-02      |
| hCoV-19/Japan/PG-81421/2021 | EPI_ISL_3893783 | 2021-09-02      |
| hCoV-19/Japan/PG-81422/2021 | EPI_ISL_3893784 | 2021-09-02      |
| hCoV-19/Japan/PG-81423/2021 | EPI_ISL_3893785 | 2021-09-02      |
| hCoV-19/Japan/PG-81424/2021 | EPI_ISL_3893786 | 2021-09-02      |
| hCoV-19/Japan/PG-81425/2021 | EPI_ISL_3893787 | 2021-09-02      |
| hCoV-19/Japan/PG-81426/2021 | EPI_ISL_3893788 | 2021-09-02      |
| hCoV-19/Japan/PG-81427/2021 | EPI_ISL_3893789 | 2021-09-02      |
| hCoV-19/Japan/PG-81428/2021 | EPI_ISL_3893790 | 2021-09-02      |
| hCoV-19/Japan/PG-81429/2021 | EPI_ISL_3893791 | 2021-09-02      |
| hCoV-19/Japan/PG-81430/2021 | EPI_ISL_3893792 | 2021-09-02      |
| hCoV-19/Japan/PG-81431/2021 | EPI_ISL_3893793 | 2021-09-02      |
| hCoV-19/Japan/PG-81432/2021 | EPI_ISL_3893794 | 2021-09-02      |
| hCoV-19/Japan/PG-81433/2021 | EPI_ISL_3893795 | 2021-09-02      |
| hCoV-19/Japan/PG-81434/2021 | EPI_ISL_3893796 | 2021-09-02      |
| hCoV-19/Japan/PG-81435/2021 | EPI_ISL_3893797 | 2021-09-02      |
| hCoV-19/Japan/PG-81436/2021 | EPI_ISL_3893798 | 2021-09-02      |
| hCoV-19/Japan/PG-81437/2021 | EPI_ISL_3893799 | 2021-09-02      |
| hCoV-19/Japan/PG-81438/2021 | EPI_ISL_3893800 | 2021-09-02      |
| hCoV-19/Japan/PG-81439/2021 | EPI_ISL_3893801 | 2021-09-02      |
| hCoV-19/Japan/PG-81440/2021 | EPI_ISL_3893802 | 2021-09-02      |
| hCoV-19/Japan/PG-81441/2021 | EPI_ISL_3893803 | 2021-09-02      |
| hCoV-19/Japan/PG-81442/2021 | EPI_ISL_3893804 | 2021-09-02      |
| hCoV-19/Japan/PG-81443/2021 | EPI_ISL_3893805 | 2021-09-02      |
| hCoV-19/Japan/PG-81444/2021 | EPI_ISL_3893806 | 2021-09-02      |
| hCoV-19/Japan/PG-81445/2021 | EPI_ISL_3893807 | 2021-09-02      |
| hCoV-19/Japan/PG-81446/2021 | EPI_ISL_3893808 | 2021-09-02      |
| hCoV-19/Japan/PG-81447/2021 | EPI_ISL_3893809 | 2021-09-02      |
| hCoV-19/Japan/PG-81448/2021 | EPI_ISL_3893810 | 2021-09-02      |
| hCoV-19/Japan/PG-81449/2021 | EPI_ISL_3893811 | 2021-09-02      |

| virus_name                  | epiID           | submission_date |
|-----------------------------|-----------------|-----------------|
| hCoV-19/Japan/PG-81450/2021 | EPI_ISL_3893812 | 2021-09-02      |
| hCoV-19/Japan/PG-81451/2021 | EPI_ISL_3893813 | 2021-09-02      |
| hCoV-19/Japan/PG-81452/2021 | EPI_ISL_3893814 | 2021-09-02      |
| hCoV-19/Japan/PG-81453/2021 | EPI_ISL_3893815 | 2021-09-02      |
| hCoV-19/Japan/PG-81454/2021 | EPI_ISL_3893816 | 2021-09-02      |
| hCoV-19/Japan/PG-81455/2021 | EPI_ISL_3893817 | 2021-09-02      |
| hCoV-19/Japan/PG-81456/2021 | EPI_ISL_3893818 | 2021-09-02      |
| hCoV-19/Japan/PG-81457/2021 | EPI_ISL_3893819 | 2021-09-02      |
| hCoV-19/Japan/PG-81458/2021 | EPI_ISL_3893820 | 2021-09-02      |
| hCoV-19/Japan/PG-81459/2021 | EPI_ISL_3893821 | 2021-09-02      |
| hCoV-19/Japan/PG-81460/2021 | EPI_ISL_3893822 | 2021-09-02      |
| hCoV-19/Japan/PG-81461/2021 | EPI_ISL_3893823 | 2021-09-02      |
| hCoV-19/Japan/PG-81462/2021 | EPI_ISL_3893824 | 2021-09-02      |
| hCoV-19/Japan/PG-81463/2021 | EPI_ISL_3893825 | 2021-09-02      |
| hCoV-19/Japan/PG-81464/2021 | EPI_ISL_3893826 | 2021-09-02      |
| hCoV-19/Japan/PG-81465/2021 | EPI_ISL_3893827 | 2021-09-02      |
| hCoV-19/Japan/PG-81466/2021 | EPI_ISL_3893828 | 2021-09-02      |
| hCoV-19/Japan/PG-81467/2021 | EPI_ISL_3893829 | 2021-09-02      |
| hCoV-19/Japan/PG-81468/2021 | EPI_ISL_3893830 | 2021-09-02      |
| hCoV-19/Japan/PG-81469/2021 | EPI_ISL_3893831 | 2021-09-02      |
| hCoV-19/Japan/PG-81470/2021 | EPI_ISL_3893832 | 2021-09-02      |
| hCoV-19/Japan/PG-81471/2021 | EPI_ISL_3893833 | 2021-09-02      |
| hCoV-19/Japan/PG-81472/2021 | EPI_ISL_3893834 | 2021-09-02      |
| hCoV-19/Japan/PG-81473/2021 | EPI_ISL_3893835 | 2021-09-02      |
| hCoV-19/Japan/PG-81474/2021 | EPI_ISL_3893836 | 2021-09-02      |
| hCoV-19/Japan/PG-81475/2021 | EPI_ISL_3893837 | 2021-09-02      |
| hCoV-19/Japan/PG-81476/2021 | EPI_ISL_3893838 | 2021-09-02      |
| hCoV-19/Japan/PG-81477/2021 | EPI_ISL_3893839 | 2021-09-02      |
| hCoV-19/Japan/PG-81478/2021 | EPI_ISL_3893840 | 2021-09-02      |
| hCoV-19/Japan/PG-81479/2021 | EPI_ISL_3893841 | 2021-09-02      |
| hCoV-19/Japan/PG-81480/2021 | EPI_ISL_3893842 | 2021-09-02      |
| hCoV-19/Japan/PG-81481/2021 | EPI_ISL_3893843 | 2021-09-02      |
| hCoV-19/Japan/PG-81482/2021 | EPI_ISL_3893844 | 2021-09-02      |
| hCoV-19/Japan/PG-81483/2021 | EPI_ISL_3893845 | 2021-09-02      |
| hCoV-19/Japan/PG-81484/2021 | EPI_ISL_3893846 | 2021-09-02      |
| hCoV-19/Japan/PG-81485/2021 | EPI_ISL_3893847 | 2021-09-02      |
| hCoV-19/Japan/PG-81486/2021 | EPI_ISL_3893848 | 2021-09-02      |
| hCoV-19/Japan/PG-81487/2021 | EPI_ISL_3893849 | 2021-09-02      |
| hCoV-19/Japan/PG-81488/2021 | EPI_ISL_3893850 | 2021-09-02      |
| hCoV-19/Japan/PG-81489/2021 | EPI_ISL_3893851 | 2021-09-02      |
| hCoV-19/Japan/PG-81490/2021 | EPI_ISL_3893852 | 2021-09-02      |
| hCoV-19/Japan/PG-81491/2021 | EPI_ISL_3893853 | 2021-09-02      |
| hCoV-19/Japan/PG-81492/2021 | EPI_ISL_3893854 | 2021-09-02      |
| hCoV-19/Japan/PG-81493/2021 | EPI_ISL_3893855 | 2021-09-02      |
| hCoV-19/Japan/PG-81494/2021 | EPI_ISL_3893856 | 2021-09-02      |
| hCoV-19/Japan/PG-81495/2021 | EPI_ISL_3893857 | 2021-09-02      |
| hCoV-19/Japan/PG-81496/2021 | EPI_ISL_3893858 | 2021-09-02      |
| hCoV-19/Japan/PG-81497/2021 | EPI_ISL_3893859 | 2021-09-02      |
| hCoV-19/Japan/PG-81498/2021 | EPI_ISL_3893860 | 2021-09-02      |
| hCoV-19/Japan/PG-81499/2021 | EPI_ISL_3893861 | 2021-09-02      |
| hCoV-19/Japan/PG-81500/2021 | EPI_ISL_3893862 | 2021-09-02      |
| hCoV-19/Japan/PG-81501/2021 | EPI_ISL_3893863 | 2021-09-02      |
| hCoV-19/Japan/PG-81502/2021 | EPI_ISL_3893864 | 2021-09-02      |
| hCoV-19/Japan/PG-81503/2021 | EPI_ISL_3893865 | 2021-09-02      |

| virus_name                  | epiID           | submission_date |
|-----------------------------|-----------------|-----------------|
| hCoV-19/Japan/PG-81504/2021 | EPI_ISL_3893866 | 2021-09-02      |
| hCoV-19/Japan/PG-81505/2021 | EPI_ISL_3893867 | 2021-09-02      |
| hCoV-19/Japan/PG-81506/2021 | EPI_ISL_3893868 | 2021-09-02      |
| hCoV-19/Japan/PG-81507/2021 | EPI_ISL_3893869 | 2021-09-02      |
| hCoV-19/Japan/PG-81508/2021 | EPI_ISL_3893870 | 2021-09-02      |
| hCoV-19/Japan/PG-81509/2021 | EPI_ISL_3893871 | 2021-09-02      |
| hCoV-19/Japan/PG-81510/2021 | EPI_ISL_3893872 | 2021-09-02      |
| hCoV-19/Japan/PG-81511/2021 | EPI_ISL_3893873 | 2021-09-02      |
| hCoV-19/Japan/PG-81512/2021 | EPI_ISL_3893874 | 2021-09-02      |
| hCoV-19/Japan/PG-81513/2021 | EPI_ISL_3893875 | 2021-09-02      |
| hCoV-19/Japan/PG-81514/2021 | EPI_ISL_3893876 | 2021-09-02      |
| hCoV-19/Japan/PG-81515/2021 | EPI_ISL_3893877 | 2021-09-02      |
| hCoV-19/Japan/PG-81516/2021 | EPI_ISL_3893878 | 2021-09-02      |
| hCoV-19/Japan/PG-81517/2021 | EPI_ISL_3893879 | 2021-09-02      |
| hCoV-19/Japan/PG-81518/2021 | EPI_ISL_3893880 | 2021-09-02      |
| hCoV-19/Japan/PG-81519/2021 | EPI_ISL_3893881 | 2021-09-02      |
| hCoV-19/Japan/PG-81520/2021 | EPI_ISL_3893882 | 2021-09-02      |
| hCoV-19/Japan/PG-81521/2021 | EPI_ISL_3893883 | 2021-09-02      |
| hCoV-19/Japan/PG-81522/2021 | EPI_ISL_3893884 | 2021-09-02      |
| hCoV-19/Japan/PG-81523/2021 | EPI_ISL_3893885 | 2021-09-02      |
| hCoV-19/Japan/PG-81524/2021 | EPI_ISL_3893886 | 2021-09-02      |
| hCoV-19/Japan/PG-81525/2021 | EPI_ISL_3893887 | 2021-09-02      |
| hCoV-19/Japan/PG-81526/2021 | EPI_ISL_3893888 | 2021-09-02      |
| hCoV-19/Japan/PG-81527/2021 | EPI_ISL_3893889 | 2021-09-02      |
| hCoV-19/Japan/PG-81528/2021 | EPI_ISL_3893890 | 2021-09-02      |
| hCoV-19/Japan/PG-81529/2021 | EPI_ISL_3893891 | 2021-09-02      |
| hCoV-19/Japan/PG-81530/2021 | EPI_ISL_3893892 | 2021-09-02      |
| hCoV-19/Japan/PG-81531/2021 | EPI_ISL_3893893 | 2021-09-02      |
| hCoV-19/Japan/PG-81532/2021 | EPI_ISL_3893894 | 2021-09-02      |
| hCoV-19/Japan/PG-81533/2021 | EPI_ISL_3893895 | 2021-09-02      |
| hCoV-19/Japan/PG-81534/2021 | EPI_ISL_3893896 | 2021-09-02      |
| hCoV-19/Japan/PG-81535/2021 | EPI_ISL_3893897 | 2021-09-02      |
| hCoV-19/Japan/PG-81536/2021 | EPI_ISL_3893898 | 2021-09-02      |
| hCoV-19/Japan/PG-81537/2021 | EPI_ISL_3893899 | 2021-09-02      |
| hCoV-19/Japan/PG-81538/2021 | EPI_ISL_3893900 | 2021-09-02      |
| hCoV-19/Japan/PG-81539/2021 | EPI_ISL_3893901 | 2021-09-02      |
| hCoV-19/Japan/PG-81540/2021 | EPI_ISL_3893902 | 2021-09-02      |
| hCoV-19/Japan/PG-81541/2021 | EPI_ISL_3893904 | 2021-09-02      |
| hCoV-19/Japan/PG-81542/2021 | EPI_ISL_3893905 | 2021-09-02      |
| hCoV-19/Japan/PG-81543/2021 | EPI_ISL_3893906 | 2021-09-02      |
| hCoV-19/Japan/PG-81544/2021 | EPI_ISL_3893907 | 2021-09-02      |
| hCoV-19/Japan/PG-81545/2021 | EPI_ISL_3893908 | 2021-09-02      |
| hCoV-19/Japan/PG-81546/2021 | EPI_ISL_3893909 | 2021-09-02      |
| hCoV-19/Japan/PG-81547/2021 | EPI_ISL_3893910 | 2021-09-02      |
| hCoV-19/Japan/PG-81548/2021 | EPI_ISL_3893911 | 2021-09-02      |
| hCoV-19/Japan/PG-81549/2021 | EPI_ISL_3893912 | 2021-09-02      |
| hCoV-19/Japan/PG-81550/2021 | EPI_ISL_3893913 | 2021-09-02      |
| hCoV-19/Japan/PG-81551/2021 | EPI_ISL_3893914 | 2021-09-02      |
| hCoV-19/Japan/PG-81552/2021 | EPI_ISL_3893915 | 2021-09-02      |
| hCoV-19/Japan/PG-81553/2021 | EPI_ISL_3893916 | 2021-09-02      |
| hCoV-19/Japan/PG-81554/2021 | EPI_ISL_3893917 | 2021-09-02      |
| hCoV-19/Japan/PG-81555/2021 | EPI_ISL_3893918 | 2021-09-02      |
| hCoV-19/Japan/PG-81556/2021 | EPI_ISL_3893919 | 2021-09-02      |
| hCoV-19/Japan/PG-81557/2021 | EPI_ISL_3893920 | 2021-09-02      |

| virus_name                  | epiID           | submission_date |
|-----------------------------|-----------------|-----------------|
| hCoV-19/Japan/PG-81558/2021 | EPI_ISL_3893921 | 2021-09-02      |
| hCoV-19/Japan/PG-81559/2021 | EPI_ISL_3893922 | 2021-09-02      |
| hCoV-19/Japan/PG-81560/2021 | EPI_ISL_3893923 | 2021-09-02      |
| hCoV-19/Japan/PG-81561/2021 | EPI_ISL_3893924 | 2021-09-02      |
| hCoV-19/Japan/PG-81562/2021 | EPI_ISL_3893925 | 2021-09-02      |
| hCoV-19/Japan/PG-81563/2021 | EPI_ISL_3893926 | 2021-09-02      |
| hCoV-19/Japan/PG-81564/2021 | EPI_ISL_3893927 | 2021-09-02      |
| hCoV-19/Japan/PG-81565/2021 | EPI_ISL_3893928 | 2021-09-02      |
| hCoV-19/Japan/PG-81566/2021 | EPI_ISL_3893929 | 2021-09-02      |
| hCoV-19/Japan/PG-81567/2021 | EPI_ISL_3893930 | 2021-09-02      |
| hCoV-19/Japan/PG-81568/2021 | EPI_ISL_3893931 | 2021-09-02      |
| hCoV-19/Japan/PG-81569/2021 | EPI_ISL_3893932 | 2021-09-02      |
| hCoV-19/Japan/PG-81570/2021 | EPI_ISL_3893933 | 2021-09-02      |
| hCoV-19/Japan/PG-81571/2021 | EPI_ISL_3893934 | 2021-09-02      |
| hCoV-19/Japan/PG-81572/2021 | EPI_ISL_3893935 | 2021-09-02      |
| hCoV-19/Japan/PG-81573/2021 | EPI_ISL_3893936 | 2021-09-02      |
| hCoV-19/Japan/PG-81574/2021 | EPI_ISL_3893937 | 2021-09-02      |
| hCoV-19/Japan/PG-81575/2021 | EPI_ISL_3893938 | 2021-09-02      |
| hCoV-19/Japan/PG-81576/2021 | EPI_ISL_3893939 | 2021-09-02      |
| hCoV-19/Japan/PG-81577/2021 | EPI_ISL_3893940 | 2021-09-02      |
| hCoV-19/Japan/PG-81578/2021 | EPI_ISL_3893941 | 2021-09-02      |
| hCoV-19/Japan/PG-81579/2021 | EPI_ISL_3893942 | 2021-09-02      |
| hCoV-19/Japan/PG-81580/2021 | EPI_ISL_3893943 | 2021-09-02      |
| hCoV-19/Japan/PG-81581/2021 | EPI_ISL_3893944 | 2021-09-02      |
| hCoV-19/Japan/PG-81582/2021 | EPI_ISL_3893945 | 2021-09-02      |
| hCoV-19/Japan/PG-81583/2021 | EPI_ISL_3893946 | 2021-09-02      |
| hCoV-19/Japan/PG-81584/2021 | EPI_ISL_3893947 | 2021-09-02      |
| hCoV-19/Japan/PG-81585/2021 | EPI_ISL_3893948 | 2021-09-02      |
| hCoV-19/Japan/PG-81586/2021 | EPI_ISL_3893949 | 2021-09-02      |
| hCoV-19/Japan/PG-81587/2021 | EPI_ISL_3893950 | 2021-09-02      |
| hCoV-19/Japan/PG-81588/2021 | EPI_ISL_3893951 | 2021-09-02      |
| hCoV-19/Japan/PG-81589/2021 | EPI_ISL_3893952 | 2021-09-02      |
| hCoV-19/Japan/PG-81590/2021 | EPI_ISL_3893953 | 2021-09-02      |
| hCoV-19/Japan/PG-81591/2021 | EPI_ISL_3893954 | 2021-09-02      |
| hCoV-19/Japan/PG-81592/2021 | EPI_ISL_3893955 | 2021-09-02      |
| hCoV-19/Japan/PG-81593/2021 | EPI_ISL_3893956 | 2021-09-02      |
| hCoV-19/Japan/PG-81594/2021 | EPI_ISL_3893957 | 2021-09-02      |
| hCoV-19/Japan/PG-81595/2021 | EPI_ISL_3893958 | 2021-09-02      |
| hCoV-19/Japan/PG-81596/2021 | EPI_ISL_3893959 | 2021-09-02      |
| hCoV-19/Japan/PG-81597/2021 | EPI_ISL_3893960 | 2021-09-02      |
| hCoV-19/Japan/PG-81598/2021 | EPI_ISL_3893961 | 2021-09-02      |
| hCoV-19/Japan/PG-81599/2021 | EPI_ISL_3893962 | 2021-09-02      |
| hCoV-19/Japan/PG-81600/2021 | EPI_ISL_3893963 | 2021-09-02      |
| hCoV-19/Japan/PG-81601/2021 | EPI_ISL_3893964 | 2021-09-02      |
| hCoV-19/Japan/PG-81602/2021 | EPI_ISL_3893965 | 2021-09-02      |
| hCoV-19/Japan/PG-81603/2021 | EPI_ISL_3893966 | 2021-09-02      |
| hCoV-19/Japan/PG-81604/2021 | EPI_ISL_3893967 | 2021-09-02      |
| hCoV-19/Japan/PG-81605/2021 | EPI_ISL_3893968 | 2021-09-02      |
| hCoV-19/Japan/PG-81606/2021 | EPI_ISL_3893969 | 2021-09-02      |
| hCoV-19/Japan/PG-81607/2021 | EPI_ISL_3893970 | 2021-09-02      |
| hCoV-19/Japan/PG-81608/2021 | EPI_ISL_3893971 | 2021-09-02      |
| hCoV-19/Japan/PG-81609/2021 | EPI_ISL_3893972 | 2021-09-02      |
| hCoV-19/Japan/PG-81610/2021 | EPI_ISL_3893973 | 2021-09-02      |
| hCoV-19/Japan/PG-81611/2021 | EPI_ISL_3893974 | 2021-09-02      |



| virus_name                  | epiID           | submission_date |
|-----------------------------|-----------------|-----------------|
| hCoV-19/Japan/PG-81612/2021 | EPI_ISL_3893975 | 2021-09-02      |
| hCoV-19/Japan/PG-81613/2021 | EPI_ISL_3893976 | 2021-09-02      |
| hCoV-19/Japan/PG-81614/2021 | EPI_ISL_3893977 | 2021-09-02      |
| hCoV-19/Japan/PG-81615/2021 | EPI_ISL_3893978 | 2021-09-02      |
| hCoV-19/Japan/PG-81616/2021 | EPI_ISL_3893979 | 2021-09-02      |
| hCoV-19/Japan/PG-81617/2021 | EPI_ISL_3893980 | 2021-09-02      |
| hCoV-19/Japan/PG-81618/2021 | EPI_ISL_3893981 | 2021-09-02      |
| hCoV-19/Japan/PG-81619/2021 | EPI_ISL_3893982 | 2021-09-02      |
| hCoV-19/Japan/PG-81620/2021 | EPI_ISL_3893983 | 2021-09-02      |
| hCoV-19/Japan/PG-81621/2021 | EPI_ISL_3893984 | 2021-09-02      |
| hCoV-19/Japan/PG-81622/2021 | EPI_ISL_3893985 | 2021-09-02      |
| hCoV-19/Japan/PG-81623/2021 | EPI_ISL_3893986 | 2021-09-02      |
| hCoV-19/Japan/PG-81624/2021 | EPI_ISL_3893987 | 2021-09-02      |
| hCoV-19/Japan/PG-81625/2021 | EPI_ISL_3893988 | 2021-09-02      |
| hCoV-19/Japan/PG-81626/2021 | EPI_ISL_3893989 | 2021-09-02      |
| hCoV-19/Japan/PG-81627/2021 | EPI_ISL_3893990 | 2021-09-02      |
| hCoV-19/Japan/PG-81628/2021 | EPI_ISL_3893991 | 2021-09-02      |
| hCoV-19/Japan/PG-81629/2021 | EPI_ISL_3893992 | 2021-09-02      |
| hCoV-19/Japan/PG-81630/2021 | EPI_ISL_3893993 | 2021-09-02      |
| hCoV-19/Japan/PG-81631/2021 | EPI_ISL_3893994 | 2021-09-02      |
| hCoV-19/Japan/PG-81632/2021 | EPI_ISL_3893995 | 2021-09-02      |
| hCoV-19/Japan/PG-81633/2021 | EPI_ISL_3893996 | 2021-09-02      |
| hCoV-19/Japan/PG-81634/2021 | EPI_ISL_3893997 | 2021-09-02      |
| hCoV-19/Japan/PG-81635/2021 | EPI_ISL_3893998 | 2021-09-02      |
| hCoV-19/Japan/PG-81636/2021 | EPI_ISL_3893999 | 2021-09-02      |
| hCoV-19/Japan/PG-81637/2021 | EPI_ISL_3894000 | 2021-09-02      |
| hCoV-19/Japan/PG-81638/2021 | EPI_ISL_3894001 | 2021-09-02      |
| hCoV-19/Japan/PG-81639/2021 | EPI_ISL_3894002 | 2021-09-02      |
| hCoV-19/Japan/PG-81640/2021 | EPI_ISL_3894003 | 2021-09-02      |
| hCoV-19/Japan/PG-81641/2021 | EPI_ISL_3894004 | 2021-09-02      |
| hCoV-19/Japan/PG-81642/2021 | EPI_ISL_3894005 | 2021-09-02      |
| hCoV-19/Japan/PG-81643/2021 | EPI_ISL_3894006 | 2021-09-02      |
| hCoV-19/Japan/PG-81644/2021 | EPI_ISL_3894007 | 2021-09-02      |
| hCoV-19/Japan/PG-81645/2021 | EPI_ISL_3894008 | 2021-09-02      |
| hCoV-19/Japan/PG-81646/2021 | EPI_ISL_3894009 | 2021-09-02      |
| hCoV-19/Japan/PG-81647/2021 | EPI_ISL_3894010 | 2021-09-02      |
| hCoV-19/Japan/PG-81648/2021 | EPI_ISL_3894011 | 2021-09-02      |
| hCoV-19/Japan/PG-81649/2021 | EPI_ISL_3894012 | 2021-09-02      |
| hCoV-19/Japan/PG-81650/2021 | EPI_ISL_3894013 | 2021-09-02      |
| hCoV-19/Japan/PG-81651/2021 | EPI_ISL_3894014 | 2021-09-02      |
| hCoV-19/Japan/PG-81652/2021 | EPI_ISL_3894015 | 2021-09-02      |
| hCoV-19/Japan/PG-81653/2021 | EPI_ISL_3894016 | 2021-09-02      |
| hCoV-19/Japan/PG-81654/2021 | EPI_ISL_3894017 | 2021-09-02      |
| hCoV-19/Japan/PG-81655/2021 | EPI_ISL_3894018 | 2021-09-02      |
| hCoV-19/Japan/PG-81656/2021 | EPI_ISL_3894019 | 2021-09-02      |
| hCoV-19/Japan/PG-81657/2021 | EPI_ISL_3894020 | 2021-09-02      |
| hCoV-19/Japan/PG-81658/2021 | EPI_ISL_3894021 | 2021-09-02      |
| hCoV-19/Japan/PG-81659/2021 | EPI_ISL_3894022 | 2021-09-02      |
| hCoV-19/Japan/PG-81660/2021 | EPI_ISL_3894023 | 2021-09-02      |
| hCoV-19/Japan/PG-81661/2021 | EPI_ISL_3894024 | 2021-09-02      |
| hCoV-19/Japan/PG-81662/2021 | EPI_ISL_3894025 | 2021-09-02      |
| hCoV-19/Japan/PG-81663/2021 | EPI_ISL_3894026 | 2021-09-02      |
| hCoV-19/Japan/PG-81664/2021 | EPI_ISL_3894027 | 2021-09-02      |
| hCoV-19/Japan/PG-81665/2021 | EPI_ISL_3894028 | 2021-09-02      |

| virus_name                  | epiID           | submission_date |
|-----------------------------|-----------------|-----------------|
| hCoV-19/Japan/PG-81666/2021 | EPI_ISL_3894029 | 2021-09-02      |
| hCoV-19/Japan/PG-81667/2021 | EPI_ISL_3894030 | 2021-09-02      |
| hCoV-19/Japan/PG-81668/2021 | EPI_ISL_3894031 | 2021-09-02      |
| hCoV-19/Japan/PG-81669/2021 | EPI_ISL_3894032 | 2021-09-02      |
| hCoV-19/Japan/PG-81670/2021 | EPI_ISL_3894033 | 2021-09-02      |
| hCoV-19/Japan/PG-81671/2021 | EPI_ISL_3894034 | 2021-09-02      |
| hCoV-19/Japan/PG-81672/2021 | EPI_ISL_3894036 | 2021-09-02      |
| hCoV-19/Japan/PG-81673/2021 | EPI_ISL_3894037 | 2021-09-02      |
| hCoV-19/Japan/PG-81674/2021 | EPI_ISL_3894038 | 2021-09-02      |
| hCoV-19/Japan/PG-81675/2021 | EPI_ISL_3894039 | 2021-09-02      |
| hCoV-19/Japan/PG-81676/2021 | EPI_ISL_3894040 | 2021-09-02      |
| hCoV-19/Japan/PG-81677/2021 | EPI_ISL_3894041 | 2021-09-02      |
| hCoV-19/Japan/PG-81678/2021 | EPI_ISL_3894042 | 2021-09-02      |
| hCoV-19/Japan/PG-81679/2021 | EPI_ISL_3894043 | 2021-09-02      |
| hCoV-19/Japan/PG-81680/2021 | EPI_ISL_3894044 | 2021-09-02      |
| hCoV-19/Japan/PG-81681/2021 | EPI_ISL_3894045 | 2021-09-02      |
| hCoV-19/Japan/PG-81682/2021 | EPI_ISL_3894046 | 2021-09-02      |
| hCoV-19/Japan/PG-81683/2021 | EPI_ISL_3894047 | 2021-09-02      |
| hCoV-19/Japan/PG-81684/2021 | EPI_ISL_3894048 | 2021-09-02      |
| hCoV-19/Japan/PG-81685/2021 | EPI_ISL_3894049 | 2021-09-02      |
| hCoV-19/Japan/PG-81686/2021 | EPI_ISL_3894050 | 2021-09-02      |
| hCoV-19/Japan/PG-81687/2021 | EPI_ISL_3894051 | 2021-09-02      |
| hCoV-19/Japan/PG-81688/2021 | EPI_ISL_3894052 | 2021-09-02      |
| hCoV-19/Japan/PG-81689/2021 | EPI_ISL_3894053 | 2021-09-02      |
| hCoV-19/Japan/PG-81690/2021 | EPI_ISL_3894054 | 2021-09-02      |
| hCoV-19/Japan/PG-81691/2021 | EPI_ISL_3894055 | 2021-09-02      |
| hCoV-19/Japan/PG-81692/2021 | EPI_ISL_3894056 | 2021-09-02      |
| hCoV-19/Japan/PG-81693/2021 | EPI_ISL_3894057 | 2021-09-02      |
| hCoV-19/Japan/PG-81694/2021 | EPI_ISL_3894058 | 2021-09-02      |
| hCoV-19/Japan/PG-81695/2021 | EPI_ISL_3894059 | 2021-09-02      |
| hCoV-19/Japan/PG-81696/2021 | EPI_ISL_3894060 | 2021-09-02      |
| hCoV-19/Japan/PG-81697/2021 | EPI_ISL_3894061 | 2021-09-02      |
| hCoV-19/Japan/PG-81698/2021 | EPI_ISL_3894062 | 2021-09-02      |
| hCoV-19/Japan/PG-81699/2021 | EPI_ISL_3894063 | 2021-09-02      |
| hCoV-19/Japan/PG-81700/2021 | EPI_ISL_3894064 | 2021-09-02      |
| hCoV-19/Japan/PG-81701/2021 | EPI_ISL_3894065 | 2021-09-02      |
| hCoV-19/Japan/PG-81702/2021 | EPI_ISL_3894066 | 2021-09-02      |
| hCoV-19/Japan/PG-81703/2021 | EPI_ISL_3894067 | 2021-09-02      |
| hCoV-19/Japan/PG-81704/2021 | EPI_ISL_3894068 | 2021-09-02      |
| hCoV-19/Japan/PG-81705/2021 | EPI_ISL_3894069 | 2021-09-02      |
| hCoV-19/Japan/PG-81706/2021 | EPI_ISL_3894070 | 2021-09-02      |
| hCoV-19/Japan/PG-81707/2021 | EPI_ISL_3894071 | 2021-09-02      |
| hCoV-19/Japan/PG-81708/2021 | EPI_ISL_3894072 | 2021-09-02      |
| hCoV-19/Japan/PG-81709/2021 | EPI_ISL_3894073 | 2021-09-02      |
| hCoV-19/Japan/PG-81710/2021 | EPI_ISL_3894074 | 2021-09-02      |
| hCoV-19/Japan/PG-81711/2021 | EPI_ISL_3894075 | 2021-09-02      |
| hCoV-19/Japan/PG-81712/2021 | EPI_ISL_3894076 | 2021-09-02      |
| hCoV-19/Japan/PG-81713/2021 | EPI_ISL_3894077 | 2021-09-02      |
| hCoV-19/Japan/PG-81714/2021 | EPI_ISL_3894078 | 2021-09-02      |
| hCoV-19/Japan/PG-81715/2021 | EPI_ISL_3894079 | 2021-09-02      |
| hCoV-19/Japan/PG-81716/2021 | EPI_ISL_3894080 | 2021-09-02      |
| hCoV-19/Japan/PG-81717/2021 | EPI_ISL_3894081 | 2021-09-02      |
| hCoV-19/Japan/PG-81718/2021 | EPI_ISL_3894082 | 2021-09-02      |
| hCoV-19/Japan/PG-81719/2021 | EPI_ISL_3894083 | 2021-09-02      |

| virus_name                  | epiID           | submission_date |
|-----------------------------|-----------------|-----------------|
| hCoV-19/Japan/PG-81720/2021 | EPI_ISL_3894084 | 2021-09-02      |
| hCoV-19/Japan/PG-81721/2021 | EPI_ISL_3894085 | 2021-09-02      |
| hCoV-19/Japan/PG-81722/2021 | EPI_ISL_3894086 | 2021-09-02      |
| hCoV-19/Japan/PG-81723/2021 | EPI_ISL_3894087 | 2021-09-02      |
| hCoV-19/Japan/PG-81724/2021 | EPI_ISL_3894088 | 2021-09-02      |
| hCoV-19/Japan/PG-81725/2021 | EPI_ISL_3894089 | 2021-09-02      |
| hCoV-19/Japan/PG-81726/2021 | EPI_ISL_3894090 | 2021-09-02      |
| hCoV-19/Japan/PG-81727/2021 | EPI_ISL_3894091 | 2021-09-02      |
| hCoV-19/Japan/PG-81728/2021 | EPI_ISL_3894092 | 2021-09-02      |
| hCoV-19/Japan/PG-81729/2021 | EPI_ISL_3894093 | 2021-09-02      |
| hCoV-19/Japan/PG-81730/2021 | EPI_ISL_3894094 | 2021-09-02      |
| hCoV-19/Japan/PG-81731/2021 | EPI_ISL_3894095 | 2021-09-02      |
| hCoV-19/Japan/PG-81732/2021 | EPI_ISL_3894096 | 2021-09-02      |
| hCoV-19/Japan/PG-81733/2021 | EPI_ISL_3894097 | 2021-09-02      |
| hCoV-19/Japan/PG-81734/2021 | EPI_ISL_3894098 | 2021-09-02      |
| hCoV-19/Japan/PG-81735/2021 | EPI_ISL_3894099 | 2021-09-02      |
| hCoV-19/Japan/PG-81736/2021 | EPI_ISL_3894100 | 2021-09-02      |
| hCoV-19/Japan/PG-81737/2021 | EPI_ISL_3894101 | 2021-09-02      |
| hCoV-19/Japan/PG-81738/2021 | EPI_ISL_3894102 | 2021-09-02      |
| hCoV-19/Japan/PG-81739/2021 | EPI_ISL_3894103 | 2021-09-02      |
| hCoV-19/Japan/PG-81740/2021 | EPI_ISL_3894104 | 2021-09-02      |
| hCoV-19/Japan/PG-81741/2021 | EPI_ISL_3894105 | 2021-09-02      |
| hCoV-19/Japan/PG-81742/2021 | EPI_ISL_3894106 | 2021-09-02      |
| hCoV-19/Japan/PG-81743/2021 | EPI_ISL_3894107 | 2021-09-02      |
| hCoV-19/Japan/PG-81744/2021 | EPI_ISL_3894108 | 2021-09-02      |
| hCoV-19/Japan/PG-81745/2021 | EPI_ISL_3894109 | 2021-09-02      |
| hCoV-19/Japan/PG-81746/2021 | EPI_ISL_3894110 | 2021-09-02      |
| hCoV-19/Japan/PG-81747/2021 | EPI_ISL_3894111 | 2021-09-02      |
| hCoV-19/Japan/PG-81748/2021 | EPI_ISL_3894112 | 2021-09-02      |
| hCoV-19/Japan/PG-81749/2021 | EPI_ISL_3894113 | 2021-09-02      |
| hCoV-19/Japan/PG-81750/2021 | EPI_ISL_3894114 | 2021-09-02      |
| hCoV-19/Japan/PG-81751/2021 | EPI_ISL_3894115 | 2021-09-02      |
| hCoV-19/Japan/PG-81752/2021 | EPI_ISL_3894116 | 2021-09-02      |
| hCoV-19/Japan/PG-81753/2021 | EPI_ISL_3894117 | 2021-09-02      |
| hCoV-19/Japan/PG-81754/2021 | EPI_ISL_3894118 | 2021-09-02      |
| hCoV-19/Japan/PG-81755/2021 | EPI_ISL_3894119 | 2021-09-02      |
| hCoV-19/Japan/PG-81756/2021 | EPI_ISL_3894120 | 2021-09-02      |
| hCoV-19/Japan/PG-81757/2021 | EPI_ISL_3894121 | 2021-09-02      |
| hCoV-19/Japan/PG-81758/2021 | EPI_ISL_3894122 | 2021-09-02      |
| hCoV-19/Japan/PG-81759/2021 | EPI_ISL_3894123 | 2021-09-02      |
| hCoV-19/Japan/PG-81760/2021 | EPI_ISL_3894124 | 2021-09-02      |
| hCoV-19/Japan/PG-81761/2021 | EPI_ISL_3894125 | 2021-09-02      |
| hCoV-19/Japan/PG-81762/2021 | EPI_ISL_3894126 | 2021-09-02      |
| hCoV-19/Japan/PG-81763/2021 | EPI_ISL_3894127 | 2021-09-02      |
| hCoV-19/Japan/PG-81764/2021 | EPI_ISL_3894128 | 2021-09-02      |
| hCoV-19/Japan/PG-81765/2021 | EPI_ISL_3894129 | 2021-09-02      |
| hCoV-19/Japan/PG-81766/2021 | EPI_ISL_3894130 | 2021-09-02      |
| hCoV-19/Japan/PG-81767/2021 | EPI_ISL_3894131 | 2021-09-02      |
| hCoV-19/Japan/PG-81768/2021 | EPI_ISL_3894132 | 2021-09-02      |
| hCoV-19/Japan/PG-81769/2021 | EPI_ISL_3894133 | 2021-09-02      |
| hCoV-19/Japan/PG-81770/2021 | EPI_ISL_3894134 | 2021-09-02      |
| hCoV-19/Japan/PG-81771/2021 | EPI_ISL_3894135 | 2021-09-02      |
| hCoV-19/Japan/PG-81772/2021 | EPI_ISL_3894136 | 2021-09-02      |
| hCoV-19/Japan/PG-81773/2021 | EPI_ISL_3894137 | 2021-09-02      |

| virus_name                  | epiID           | submission_date |
|-----------------------------|-----------------|-----------------|
| hCoV-19/Japan/PG-81774/2021 | EPI_ISL_3894138 | 2021-09-02      |
| hCoV-19/Japan/PG-81775/2021 | EPI_ISL_3894139 | 2021-09-02      |
| hCoV-19/Japan/PG-81776/2021 | EPI_ISL_3894140 | 2021-09-02      |
| hCoV-19/Japan/PG-81777/2021 | EPI_ISL_3894141 | 2021-09-02      |
| hCoV-19/Japan/PG-81778/2021 | EPI_ISL_3894142 | 2021-09-02      |
| hCoV-19/Japan/PG-81779/2021 | EPI_ISL_3894143 | 2021-09-02      |
| hCoV-19/Japan/PG-81780/2021 | EPI_ISL_3894144 | 2021-09-02      |
| hCoV-19/Japan/PG-81781/2021 | EPI_ISL_3894145 | 2021-09-02      |
| hCoV-19/Japan/PG-81782/2021 | EPI_ISL_3894146 | 2021-09-02      |
| hCoV-19/Japan/PG-81783/2021 | EPI_ISL_3894147 | 2021-09-02      |
| hCoV-19/Japan/PG-81784/2021 | EPI_ISL_3894148 | 2021-09-02      |
| hCoV-19/Japan/PG-81785/2021 | EPI_ISL_3894149 | 2021-09-02      |
| hCoV-19/Japan/PG-81786/2021 | EPI_ISL_3894150 | 2021-09-02      |
| hCoV-19/Japan/PG-81787/2021 | EPI_ISL_3894151 | 2021-09-02      |
| hCoV-19/Japan/PG-81788/2021 | EPI_ISL_3894152 | 2021-09-02      |
| hCoV-19/Japan/PG-81789/2021 | EPI_ISL_3894153 | 2021-09-02      |
| hCoV-19/Japan/PG-81790/2021 | EPI_ISL_3894154 | 2021-09-02      |
| hCoV-19/Japan/PG-81791/2021 | EPI_ISL_3894155 | 2021-09-02      |
| hCoV-19/Japan/PG-81792/2021 | EPI_ISL_3894156 | 2021-09-02      |
| hCoV-19/Japan/PG-81793/2021 | EPI_ISL_3894157 | 2021-09-02      |
| hCoV-19/Japan/PG-81794/2021 | EPI_ISL_3894158 | 2021-09-02      |
| hCoV-19/Japan/PG-81795/2021 | EPI_ISL_3894159 | 2021-09-02      |
| hCoV-19/Japan/PG-81796/2021 | EPI_ISL_3894160 | 2021-09-02      |
| hCoV-19/Japan/PG-81797/2021 | EPI_ISL_3894161 | 2021-09-02      |
| hCoV-19/Japan/PG-81798/2021 | EPI_ISL_3894162 | 2021-09-02      |
| hCoV-19/Japan/PG-81799/2021 | EPI_ISL_3894163 | 2021-09-02      |
| hCoV-19/Japan/PG-81800/2021 | EPI_ISL_3894164 | 2021-09-02      |
| hCoV-19/Japan/PG-81801/2021 | EPI_ISL_3894165 | 2021-09-02      |
| hCoV-19/Japan/PG-81802/2021 | EPI_ISL_3894166 | 2021-09-02      |
| hCoV-19/Japan/PG-81803/2021 | EPI_ISL_3894167 | 2021-09-02      |
| hCoV-19/Japan/PG-81804/2021 | EPI_ISL_3894168 | 2021-09-02      |
| hCoV-19/Japan/PG-81805/2021 | EPI_ISL_3894169 | 2021-09-02      |
| hCoV-19/Japan/PG-81806/2021 | EPI_ISL_3894170 | 2021-09-02      |
| hCoV-19/Japan/PG-81807/2021 | EPI_ISL_3894171 | 2021-09-02      |
| hCoV-19/Japan/PG-81808/2021 | EPI_ISL_3894172 | 2021-09-02      |
| hCoV-19/Japan/PG-81809/2021 | EPI_ISL_3894173 | 2021-09-02      |
| hCoV-19/Japan/PG-81810/2021 | EPI_ISL_3894174 | 2021-09-02      |
| hCoV-19/Japan/PG-81811/2021 | EPI_ISL_3894175 | 2021-09-02      |
| hCoV-19/Japan/PG-81812/2021 | EPI_ISL_3894176 | 2021-09-02      |
| hCoV-19/Japan/PG-81813/2021 | EPI_ISL_3894177 | 2021-09-02      |
| hCoV-19/Japan/PG-81814/2021 | EPI_ISL_3894178 | 2021-09-02      |
| hCoV-19/Japan/PG-81815/2021 | EPI_ISL_3894179 | 2021-09-02      |
| hCoV-19/Japan/PG-81816/2021 | EPI_ISL_3894180 | 2021-09-02      |
| hCoV-19/Japan/PG-81817/2021 | EPI_ISL_3894181 | 2021-09-02      |
| hCoV-19/Japan/PG-81818/2021 | EPI_ISL_3894182 | 2021-09-02      |
| hCoV-19/Japan/PG-81819/2021 | EPI_ISL_3894183 | 2021-09-02      |
| hCoV-19/Japan/PG-81820/2021 | EPI_ISL_3894184 | 2021-09-02      |
| hCoV-19/Japan/PG-81821/2021 | EPI_ISL_3894185 | 2021-09-02      |
| hCoV-19/Japan/PG-81822/2021 | EPI_ISL_3894186 | 2021-09-02      |
| hCoV-19/Japan/PG-81823/2021 | EPI_ISL_3894187 | 2021-09-02      |
| hCoV-19/Japan/PG-81824/2021 | EPI_ISL_3894188 | 2021-09-02      |
| hCoV-19/Japan/PG-81825/2021 | EPI_ISL_3894189 | 2021-09-02      |
| hCoV-19/Japan/PG-81826/2021 | EPI_ISL_3894190 | 2021-09-02      |
| hCoV-19/Japan/PG-81827/2021 | EPI_ISL_3894191 | 2021-09-02      |

| virus_name                  | epiID           | submission_date |
|-----------------------------|-----------------|-----------------|
| hCoV-19/Japan/PG-81828/2021 | EPI_ISL_3894192 | 2021-09-02      |
| hCoV-19/Japan/PG-81829/2021 | EPI_ISL_3894193 | 2021-09-02      |
| hCoV-19/Japan/PG-81830/2021 | EPI_ISL_3894194 | 2021-09-02      |
| hCoV-19/Japan/PG-81831/2021 | EPI_ISL_3894195 | 2021-09-02      |
| hCoV-19/Japan/PG-81832/2021 | EPI_ISL_3894196 | 2021-09-02      |
| hCoV-19/Japan/PG-81833/2021 | EPI_ISL_3894197 | 2021-09-02      |
| hCoV-19/Japan/PG-81834/2021 | EPI_ISL_3894198 | 2021-09-02      |
| hCoV-19/Japan/PG-81835/2021 | EPI_ISL_3894199 | 2021-09-02      |
| hCoV-19/Japan/PG-81836/2021 | EPI_ISL_3894200 | 2021-09-02      |
| hCoV-19/Japan/PG-81837/2021 | EPI_ISL_3894201 | 2021-09-02      |
| hCoV-19/Japan/PG-81838/2021 | EPI_ISL_3894202 | 2021-09-02      |
| hCoV-19/Japan/PG-81839/2021 | EPI_ISL_3894203 | 2021-09-02      |
| hCoV-19/Japan/PG-81840/2021 | EPI_ISL_3894204 | 2021-09-02      |
| hCoV-19/Japan/PG-81841/2021 | EPI_ISL_3894205 | 2021-09-02      |
| hCoV-19/Japan/PG-81842/2021 | EPI_ISL_3894206 | 2021-09-02      |
| hCoV-19/Japan/PG-81843/2021 | EPI_ISL_3894207 | 2021-09-02      |
| hCoV-19/Japan/PG-81844/2021 | EPI_ISL_3894208 | 2021-09-02      |
| hCoV-19/Japan/PG-81845/2021 | EPI_ISL_3894209 | 2021-09-02      |
| hCoV-19/Japan/PG-81846/2021 | EPI_ISL_3894210 | 2021-09-02      |
| hCoV-19/Japan/PG-81847/2021 | EPI_ISL_3894211 | 2021-09-02      |
| hCoV-19/Japan/PG-81848/2021 | EPI_ISL_3894212 | 2021-09-02      |
| hCoV-19/Japan/PG-81849/2021 | EPI_ISL_3894213 | 2021-09-02      |
| hCoV-19/Japan/PG-81850/2021 | EPI_ISL_3894214 | 2021-09-02      |
| hCoV-19/Japan/PG-81851/2021 | EPI_ISL_3894215 | 2021-09-02      |
| hCoV-19/Japan/PG-81852/2021 | EPI_ISL_3894216 | 2021-09-02      |
| hCoV-19/Japan/PG-81853/2021 | EPI_ISL_3894217 | 2021-09-02      |
| hCoV-19/Japan/PG-81854/2021 | EPI_ISL_3894218 | 2021-09-02      |
| hCoV-19/Japan/PG-81855/2021 | EPI_ISL_3894219 | 2021-09-02      |
| hCoV-19/Japan/PG-81856/2021 | EPI_ISL_3894220 | 2021-09-02      |
| hCoV-19/Japan/PG-81857/2021 | EPI_ISL_3894221 | 2021-09-02      |
| hCoV-19/Japan/PG-81858/2021 | EPI_ISL_3894222 | 2021-09-02      |
| hCoV-19/Japan/PG-81859/2021 | EPI_ISL_3894223 | 2021-09-02      |
| hCoV-19/Japan/PG-81860/2021 | EPI_ISL_3894224 | 2021-09-02      |
| hCoV-19/Japan/PG-81861/2021 | EPI_ISL_3894225 | 2021-09-02      |
| hCoV-19/Japan/PG-81862/2021 | EPI_ISL_3894226 | 2021-09-02      |
| hCoV-19/Japan/PG-81863/2021 | EPI_ISL_3894227 | 2021-09-02      |
| hCoV-19/Japan/PG-81864/2021 | EPI_ISL_3894228 | 2021-09-02      |
| hCoV-19/Japan/PG-81865/2021 | EPI_ISL_3894229 | 2021-09-02      |
| hCoV-19/Japan/PG-81866/2021 | EPI_ISL_3894230 | 2021-09-02      |
| hCoV-19/Japan/PG-81867/2021 | EPI_ISL_3894231 | 2021-09-02      |
| hCoV-19/Japan/PG-81868/2021 | EPI_ISL_3894232 | 2021-09-02      |
| hCoV-19/Japan/PG-81869/2021 | EPI_ISL_3894233 | 2021-09-02      |
| hCoV-19/Japan/PG-81870/2021 | EPI_ISL_3894234 | 2021-09-02      |
| hCoV-19/Japan/PG-81871/2021 | EPI_ISL_3894235 | 2021-09-02      |
| hCoV-19/Japan/PG-81872/2021 | EPI_ISL_3894236 | 2021-09-02      |
| hCoV-19/Japan/PG-81873/2021 | EPI_ISL_3894237 | 2021-09-02      |
| hCoV-19/Japan/PG-81874/2021 | EPI_ISL_3894238 | 2021-09-02      |
| hCoV-19/Japan/PG-81875/2021 | EPI_ISL_3894239 | 2021-09-02      |
| hCoV-19/Japan/PG-81876/2021 | EPI_ISL_3894240 | 2021-09-02      |
| hCoV-19/Japan/PG-81877/2021 | EPI_ISL_3894241 | 2021-09-02      |
| hCoV-19/Japan/PG-81878/2021 | EPI_ISL_3894242 | 2021-09-02      |
| hCoV-19/Japan/PG-81879/2021 | EPI_ISL_3894243 | 2021-09-02      |
| hCoV-19/Japan/PG-81880/2021 | EPI_ISL_3894244 | 2021-09-02      |
| hCoV-19/Japan/PG-81881/2021 | EPI_ISL_3894245 | 2021-09-02      |

| virus_name                  | epiID           | submission_date |
|-----------------------------|-----------------|-----------------|
| hCoV-19/Japan/PG-81882/2021 | EPI_ISL_3894246 | 2021-09-02      |
| hCoV-19/Japan/PG-81883/2021 | EPI_ISL_3894247 | 2021-09-02      |
| hCoV-19/Japan/PG-81884/2021 | EPI_ISL_3894248 | 2021-09-02      |
| hCoV-19/Japan/PG-81885/2021 | EPI_ISL_3894249 | 2021-09-02      |
| hCoV-19/Japan/PG-81886/2021 | EPI_ISL_3894250 | 2021-09-02      |
| hCoV-19/Japan/PG-81887/2021 | EPI_ISL_3894251 | 2021-09-02      |
| hCoV-19/Japan/PG-81888/2021 | EPI_ISL_3894252 | 2021-09-02      |
| hCoV-19/Japan/PG-81889/2021 | EPI_ISL_3894253 | 2021-09-02      |
| hCoV-19/Japan/PG-81890/2021 | EPI_ISL_3894254 | 2021-09-02      |
| hCoV-19/Japan/PG-81891/2021 | EPI_ISL_3894255 | 2021-09-02      |
| hCoV-19/Japan/PG-81892/2021 | EPI_ISL_3894256 | 2021-09-02      |
| hCoV-19/Japan/PG-81893/2021 | EPI_ISL_3894257 | 2021-09-02      |
| hCoV-19/Japan/PG-81894/2021 | EPI_ISL_3894258 | 2021-09-02      |
| hCoV-19/Japan/PG-81895/2021 | EPI_ISL_3894259 | 2021-09-02      |
| hCoV-19/Japan/PG-81896/2021 | EPI_ISL_3894260 | 2021-09-02      |
| hCoV-19/Japan/PG-81897/2021 | EPI_ISL_3894261 | 2021-09-02      |
| hCoV-19/Japan/PG-81898/2021 | EPI_ISL_3894262 | 2021-09-02      |
| hCoV-19/Japan/PG-81899/2021 | EPI_ISL_3894263 | 2021-09-02      |
| hCoV-19/Japan/PG-81900/2021 | EPI_ISL_3894264 | 2021-09-02      |
| hCoV-19/Japan/PG-81901/2021 | EPI_ISL_3894265 | 2021-09-02      |
| hCoV-19/Japan/PG-81902/2021 | EPI_ISL_3894266 | 2021-09-02      |
| hCoV-19/Japan/PG-81903/2021 | EPI_ISL_3894267 | 2021-09-02      |
| hCoV-19/Japan/PG-81904/2021 | EPI_ISL_3894268 | 2021-09-02      |
| hCoV-19/Japan/PG-81905/2021 | EPI_ISL_3894269 | 2021-09-02      |
| hCoV-19/Japan/PG-81906/2021 | EPI_ISL_3894270 | 2021-09-02      |
| hCoV-19/Japan/PG-81907/2021 | EPI_ISL_3894271 | 2021-09-02      |
| hCoV-19/Japan/PG-81908/2021 | EPI_ISL_3894272 | 2021-09-02      |
| hCoV-19/Japan/PG-81909/2021 | EPI_ISL_3894273 | 2021-09-02      |
| hCoV-19/Japan/PG-81910/2021 | EPI_ISL_3894274 | 2021-09-02      |
| hCoV-19/Japan/PG-81911/2021 | EPI_ISL_3894275 | 2021-09-02      |
| hCoV-19/Japan/PG-81912/2021 | EPI_ISL_3894276 | 2021-09-02      |
| hCoV-19/Japan/PG-81913/2021 | EPI_ISL_3894277 | 2021-09-02      |
| hCoV-19/Japan/PG-81914/2021 | EPI_ISL_3894278 | 2021-09-02      |
| hCoV-19/Japan/PG-81915/2021 | EPI_ISL_3894279 | 2021-09-02      |
| hCoV-19/Japan/PG-81916/2021 | EPI_ISL_3894280 | 2021-09-02      |
| hCoV-19/Japan/PG-81917/2021 | EPI_ISL_3894281 | 2021-09-02      |
| hCoV-19/Japan/PG-81918/2021 | EPI_ISL_3894282 | 2021-09-02      |
| hCoV-19/Japan/PG-81919/2021 | EPI_ISL_3894283 | 2021-09-02      |
| hCoV-19/Japan/PG-81920/2021 | EPI_ISL_3894284 | 2021-09-02      |
| hCoV-19/Japan/PG-81921/2021 | EPI_ISL_3894285 | 2021-09-02      |
| hCoV-19/Japan/PG-81922/2021 | EPI_ISL_3894286 | 2021-09-02      |
| hCoV-19/Japan/PG-81923/2021 | EPI_ISL_3894287 | 2021-09-02      |
| hCoV-19/Japan/PG-81924/2021 | EPI_ISL_3894290 | 2021-09-02      |
| hCoV-19/Japan/PG-81925/2021 | EPI_ISL_3894293 | 2021-09-02      |
| hCoV-19/Japan/PG-81926/2021 | EPI_ISL_3894297 | 2021-09-02      |
| hCoV-19/Japan/PG-81927/2021 | EPI_ISL_3894300 | 2021-09-02      |
| hCoV-19/Japan/PG-81928/2021 | EPI_ISL_3894303 | 2021-09-02      |
| hCoV-19/Japan/PG-81929/2021 | EPI_ISL_3894306 | 2021-09-02      |
| hCoV-19/Japan/PG-81930/2021 | EPI_ISL_3894310 | 2021-09-02      |
| hCoV-19/Japan/PG-81931/2021 | EPI_ISL_3894313 | 2021-09-02      |
| hCoV-19/Japan/PG-81932/2021 | EPI_ISL_3894317 | 2021-09-02      |
| hCoV-19/Japan/PG-81933/2021 | EPI_ISL_3894320 | 2021-09-02      |
| hCoV-19/Japan/PG-81934/2021 | EPI_ISL_3894323 | 2021-09-02      |
| hCoV-19/Japan/PG-81935/2021 | EPI_ISL_3894327 | 2021-09-02      |

| virus_name                  | epiID           | submission_date |
|-----------------------------|-----------------|-----------------|
| hCoV-19/Japan/PG-81936/2021 | EPI_ISL_3894330 | 2021-09-02      |
| hCoV-19/Japan/PG-81937/2021 | EPI_ISL_3894332 | 2021-09-02      |
| hCoV-19/Japan/PG-81938/2021 | EPI_ISL_3894336 | 2021-09-02      |
| hCoV-19/Japan/PG-81939/2021 | EPI_ISL_3894339 | 2021-09-02      |
| hCoV-19/Japan/PG-81940/2021 | EPI_ISL_3894340 | 2021-09-02      |
| hCoV-19/Japan/PG-81941/2021 | EPI_ISL_3894342 | 2021-09-02      |
| hCoV-19/Japan/PG-81942/2021 | EPI_ISL_3894346 | 2021-09-02      |
| hCoV-19/Japan/PG-81943/2021 | EPI_ISL_3894349 | 2021-09-02      |
| hCoV-19/Japan/PG-81944/2021 | EPI_ISL_3894353 | 2021-09-02      |
| hCoV-19/Japan/PG-81945/2021 | EPI_ISL_3894356 | 2021-09-02      |
| hCoV-19/Japan/PG-81946/2021 | EPI_ISL_3894358 | 2021-09-02      |
| hCoV-19/Japan/PG-81947/2021 | EPI_ISL_3894360 | 2021-09-02      |
| hCoV-19/Japan/PG-81948/2021 | EPI_ISL_3894361 | 2021-09-02      |
| hCoV-19/Japan/PG-81949/2021 | EPI_ISL_3894362 | 2021-09-02      |
| hCoV-19/Japan/PG-81950/2021 | EPI_ISL_3894363 | 2021-09-02      |
| hCoV-19/Japan/PG-81951/2021 | EPI_ISL_3894364 | 2021-09-02      |
| hCoV-19/Japan/PG-81952/2021 | EPI_ISL_3894365 | 2021-09-02      |
| hCoV-19/Japan/PG-81953/2021 | EPI_ISL_3894366 | 2021-09-02      |
| hCoV-19/Japan/PG-81954/2021 | EPI_ISL_3894367 | 2021-09-02      |
| hCoV-19/Japan/PG-81955/2021 | EPI_ISL_3894368 | 2021-09-02      |
| hCoV-19/Japan/PG-81956/2021 | EPI_ISL_3894369 | 2021-09-02      |
| hCoV-19/Japan/PG-81957/2021 | EPI_ISL_3894370 | 2021-09-02      |
| hCoV-19/Japan/PG-81958/2021 | EPI_ISL_3894371 | 2021-09-02      |
| hCoV-19/Japan/PG-81959/2021 | EPI_ISL_3894372 | 2021-09-02      |
| hCoV-19/Japan/PG-81960/2021 | EPI_ISL_3894373 | 2021-09-02      |
| hCoV-19/Japan/PG-81961/2021 | EPI_ISL_3894374 | 2021-09-02      |
| hCoV-19/Japan/PG-81962/2021 | EPI_ISL_3894375 | 2021-09-02      |
| hCoV-19/Japan/PG-81963/2021 | EPI_ISL_3894376 | 2021-09-02      |
| hCoV-19/Japan/PG-81964/2021 | EPI_ISL_3894377 | 2021-09-02      |
| hCoV-19/Japan/PG-81965/2021 | EPI_ISL_3894378 | 2021-09-02      |
| hCoV-19/Japan/PG-81966/2021 | EPI_ISL_3894379 | 2021-09-02      |
| hCoV-19/Japan/PG-81967/2021 | EPI_ISL_3894380 | 2021-09-02      |
| hCoV-19/Japan/PG-81968/2021 | EPI_ISL_3894381 | 2021-09-02      |
| hCoV-19/Japan/PG-81969/2021 | EPI_ISL_3894382 | 2021-09-02      |
| hCoV-19/Japan/PG-81970/2021 | EPI_ISL_3894383 | 2021-09-02      |
| hCoV-19/Japan/PG-81971/2021 | EPI_ISL_3894384 | 2021-09-02      |
| hCoV-19/Japan/PG-81972/2021 | EPI_ISL_3894385 | 2021-09-02      |
| hCoV-19/Japan/PG-81973/2021 | EPI_ISL_3894386 | 2021-09-02      |
| hCoV-19/Japan/PG-81974/2021 | EPI_ISL_3894387 | 2021-09-02      |
| hCoV-19/Japan/PG-81975/2021 | EPI_ISL_3894388 | 2021-09-02      |
| hCoV-19/Japan/PG-81976/2021 | EPI_ISL_3894389 | 2021-09-02      |
| hCoV-19/Japan/PG-81977/2021 | EPI_ISL_3894390 | 2021-09-02      |
| hCoV-19/Japan/PG-81978/2021 | EPI_ISL_3894391 | 2021-09-02      |
| hCoV-19/Japan/PG-81979/2021 | EPI_ISL_3894392 | 2021-09-02      |
| hCoV-19/Japan/PG-81980/2021 | EPI_ISL_3894393 | 2021-09-02      |
| hCoV-19/Japan/PG-81981/2021 | EPI_ISL_3894394 | 2021-09-02      |
| hCoV-19/Japan/PG-81982/2021 | EPI_ISL_3894395 | 2021-09-02      |
| hCoV-19/Japan/PG-81983/2021 | EPI_ISL_3894396 | 2021-09-02      |
| hCoV-19/Japan/PG-81984/2021 | EPI_ISL_3894397 | 2021-09-02      |
| hCoV-19/Japan/PG-81985/2021 | EPI_ISL_3894398 | 2021-09-02      |
| hCoV-19/Japan/PG-81986/2021 | EPI_ISL_3894399 | 2021-09-02      |
| hCoV-19/Japan/PG-81987/2021 | EPI_ISL_3894400 | 2021-09-02      |
| hCoV-19/Japan/PG-81988/2021 | EPI_ISL_3894403 | 2021-09-02      |
| hCoV-19/Japan/PG-81989/2021 | EPI_ISL_3894405 | 2021-09-02      |

| virus_name                  | epiID           | submission_date |
|-----------------------------|-----------------|-----------------|
| hCoV-19/Japan/PG-81990/2021 | EPI_ISL_3894406 | 2021-09-02      |
| hCoV-19/Japan/PG-81991/2021 | EPI_ISL_3894408 | 2021-09-02      |
| hCoV-19/Japan/PG-81992/2021 | EPI_ISL_3894409 | 2021-09-02      |
| hCoV-19/Japan/PG-81993/2021 | EPI_ISL_3894410 | 2021-09-02      |
| hCoV-19/Japan/PG-81994/2021 | EPI_ISL_3894414 | 2021-09-02      |
| hCoV-19/Japan/PG-81995/2021 | EPI_ISL_3894417 | 2021-09-02      |
| hCoV-19/Japan/PG-81996/2021 | EPI_ISL_3894420 | 2021-09-02      |
| hCoV-19/Japan/PG-81997/2021 | EPI_ISL_3894424 | 2021-09-02      |
| hCoV-19/Japan/PG-81998/2021 | EPI_ISL_3894425 | 2021-09-02      |
| hCoV-19/Japan/PG-81999/2021 | EPI_ISL_3894426 | 2021-09-02      |
| hCoV-19/Japan/PG-82000/2021 | EPI_ISL_3894428 | 2021-09-02      |
| hCoV-19/Japan/PG-82001/2021 | EPI_ISL_3894429 | 2021-09-02      |
| hCoV-19/Japan/PG-82002/2021 | EPI_ISL_3894431 | 2021-09-02      |
| hCoV-19/Japan/PG-82003/2021 | EPI_ISL_3894432 | 2021-09-02      |
| hCoV-19/Japan/PG-82004/2021 | EPI_ISL_3894434 | 2021-09-02      |
| hCoV-19/Japan/PG-82005/2021 | EPI_ISL_3894435 | 2021-09-02      |
| hCoV-19/Japan/PG-82006/2021 | EPI_ISL_3894437 | 2021-09-02      |
| hCoV-19/Japan/PG-82007/2021 | EPI_ISL_3894438 | 2021-09-02      |
| hCoV-19/Japan/PG-82008/2021 | EPI_ISL_3894440 | 2021-09-02      |
| hCoV-19/Japan/PG-82009/2021 | EPI_ISL_3894444 | 2021-09-02      |
| hCoV-19/Japan/PG-82010/2021 | EPI_ISL_3894447 | 2021-09-02      |
| hCoV-19/Japan/PG-82011/2021 | EPI_ISL_3894451 | 2021-09-02      |
| hCoV-19/Japan/PG-82012/2021 | EPI_ISL_3894454 | 2021-09-02      |
| hCoV-19/Japan/PG-82013/2021 | EPI_ISL_3894457 | 2021-09-02      |
| hCoV-19/Japan/PG-82014/2021 | EPI_ISL_3894460 | 2021-09-02      |
| hCoV-19/Japan/PG-82015/2021 | EPI_ISL_3894461 | 2021-09-02      |
| hCoV-19/Japan/PG-82016/2021 | EPI_ISL_3894463 | 2021-09-02      |
| hCoV-19/Japan/PG-82017/2021 | EPI_ISL_3894465 | 2021-09-02      |
| hCoV-19/Japan/PG-82018/2021 | EPI_ISL_3894467 | 2021-09-02      |
| hCoV-19/Japan/PG-82019/2021 | EPI_ISL_3894470 | 2021-09-02      |
| hCoV-19/Japan/PG-82020/2021 | EPI_ISL_3894471 | 2021-09-02      |
| hCoV-19/Japan/PG-82021/2021 | EPI_ISL_3894472 | 2021-09-02      |
| hCoV-19/Japan/PG-82022/2021 | EPI_ISL_3894474 | 2021-09-02      |
| hCoV-19/Japan/PG-82023/2021 | EPI_ISL_3894475 | 2021-09-02      |
| hCoV-19/Japan/PG-82024/2021 | EPI_ISL_3894478 | 2021-09-02      |
| hCoV-19/Japan/PG-82025/2021 | EPI_ISL_3894479 | 2021-09-02      |
| hCoV-19/Japan/PG-82026/2021 | EPI_ISL_3894481 | 2021-09-02      |
| hCoV-19/Japan/PG-82027/2021 | EPI_ISL_3894482 | 2021-09-02      |
| hCoV-19/Japan/PG-82028/2021 | EPI_ISL_3894484 | 2021-09-02      |
| hCoV-19/Japan/PG-82029/2021 | EPI_ISL_3894487 | 2021-09-02      |
| hCoV-19/Japan/PG-82030/2021 | EPI_ISL_3894490 | 2021-09-02      |
| hCoV-19/Japan/PG-82031/2021 | EPI_ISL_3894492 | 2021-09-02      |
| hCoV-19/Japan/PG-82032/2021 | EPI_ISL_3894493 | 2021-09-02      |
| hCoV-19/Japan/PG-82033/2021 | EPI_ISL_3894495 | 2021-09-02      |
| hCoV-19/Japan/PG-82034/2021 | EPI_ISL_3894496 | 2021-09-02      |
| hCoV-19/Japan/PG-82035/2021 | EPI_ISL_3894498 | 2021-09-02      |
| hCoV-19/Japan/PG-82036/2021 | EPI_ISL_3894499 | 2021-09-02      |
| hCoV-19/Japan/PG-82037/2021 | EPI_ISL_3894501 | 2021-09-02      |
| hCoV-19/Japan/PG-82038/2021 | EPI_ISL_3894502 | 2021-09-02      |
| hCoV-19/Japan/PG-82039/2021 | EPI_ISL_3894503 | 2021-09-02      |
| hCoV-19/Japan/PG-82040/2021 | EPI_ISL_3894505 | 2021-09-02      |
| hCoV-19/Japan/PG-82041/2021 | EPI_ISL_3894506 | 2021-09-02      |
| hCoV-19/Japan/PG-82042/2021 | EPI_ISL_3894508 | 2021-09-02      |
| hCoV-19/Japan/PG-82043/2021 | EPI_ISL_3894509 | 2021-09-02      |



| virus_name                  | epiID           | submission_date |
|-----------------------------|-----------------|-----------------|
| hCoV-19/Japan/PG-82044/2021 | EPI_ISL_3894511 | 2021-09-02      |
| hCoV-19/Japan/PG-82045/2021 | EPI_ISL_3894512 | 2021-09-02      |
| hCoV-19/Japan/PG-82046/2021 | EPI_ISL_3894513 | 2021-09-02      |
| hCoV-19/Japan/PG-82047/2021 | EPI_ISL_3894515 | 2021-09-02      |
| hCoV-19/Japan/PG-82048/2021 | EPI_ISL_3894516 | 2021-09-02      |
| hCoV-19/Japan/PG-82049/2021 | EPI_ISL_3894518 | 2021-09-02      |
| hCoV-19/Japan/PG-82050/2021 | EPI_ISL_3894519 | 2021-09-02      |
| hCoV-19/Japan/PG-82051/2021 | EPI_ISL_3894520 | 2021-09-02      |
| hCoV-19/Japan/PG-82052/2021 | EPI_ISL_3894522 | 2021-09-02      |
| hCoV-19/Japan/PG-82053/2021 | EPI_ISL_3894523 | 2021-09-02      |
| hCoV-19/Japan/PG-82054/2021 | EPI_ISL_3894525 | 2021-09-02      |
| hCoV-19/Japan/PG-82055/2021 | EPI_ISL_3894526 | 2021-09-02      |
| hCoV-19/Japan/PG-82056/2021 | EPI_ISL_3894528 | 2021-09-02      |
| hCoV-19/Japan/PG-82057/2021 | EPI_ISL_3894529 | 2021-09-02      |
| hCoV-19/Japan/PG-82058/2021 | EPI_ISL_3894530 | 2021-09-02      |
| hCoV-19/Japan/PG-82059/2021 | EPI_ISL_3894533 | 2021-09-02      |
| hCoV-19/Japan/PG-82060/2021 | EPI_ISL_3894537 | 2021-09-02      |
| hCoV-19/Japan/PG-82061/2021 | EPI_ISL_3894540 | 2021-09-02      |
| hCoV-19/Japan/PG-82062/2021 | EPI_ISL_3894543 | 2021-09-02      |
| hCoV-19/Japan/PG-82063/2021 | EPI_ISL_3894547 | 2021-09-02      |
| hCoV-19/Japan/PG-82064/2021 | EPI_ISL_3894550 | 2021-09-02      |
| hCoV-19/Japan/PG-82065/2021 | EPI_ISL_3894554 | 2021-09-02      |
| hCoV-19/Japan/PG-82066/2021 | EPI_ISL_3894557 | 2021-09-02      |
| hCoV-19/Japan/PG-82067/2021 | EPI_ISL_3894561 | 2021-09-02      |
| hCoV-19/Japan/PG-82068/2021 | EPI_ISL_3894564 | 2021-09-02      |
| hCoV-19/Japan/PG-82069/2021 | EPI_ISL_3894568 | 2021-09-02      |
| hCoV-19/Japan/PG-82070/2021 | EPI_ISL_3894571 | 2021-09-02      |
| hCoV-19/Japan/PG-82071/2021 | EPI_ISL_3894573 | 2021-09-02      |
| hCoV-19/Japan/PG-82072/2021 | EPI_ISL_3904518 | 2021-09-02      |
| hCoV-19/Japan/PG-82073/2021 | EPI_ISL_3904519 | 2021-09-02      |
| hCoV-19/Japan/PG-82074/2021 | EPI_ISL_3904520 | 2021-09-02      |
| hCoV-19/Japan/PG-82075/2021 | EPI_ISL_3904521 | 2021-09-02      |
| hCoV-19/Japan/PG-82076/2021 | EPI_ISL_3904522 | 2021-09-02      |
| hCoV-19/Japan/PG-82077/2021 | EPI_ISL_3904523 | 2021-09-02      |
| hCoV-19/Japan/PG-82078/2021 | EPI_ISL_3904524 | 2021-09-02      |
| hCoV-19/Japan/PG-82079/2021 | EPI_ISL_3904525 | 2021-09-02      |
| hCoV-19/Japan/PG-82080/2021 | EPI_ISL_3904526 | 2021-09-02      |
| hCoV-19/Japan/PG-82081/2021 | EPI_ISL_3904527 | 2021-09-02      |
| hCoV-19/Japan/PG-82082/2021 | EPI_ISL_3904528 | 2021-09-02      |
| hCoV-19/Japan/PG-82083/2021 | EPI_ISL_3904529 | 2021-09-02      |
| hCoV-19/Japan/PG-82084/2021 | EPI_ISL_3904530 | 2021-09-02      |
| hCoV-19/Japan/PG-82085/2021 | EPI_ISL_3904531 | 2021-09-02      |
| hCoV-19/Japan/PG-82086/2021 | EPI_ISL_3904532 | 2021-09-02      |
| hCoV-19/Japan/PG-82087/2021 | EPI_ISL_3904533 | 2021-09-02      |
| hCoV-19/Japan/PG-82088/2021 | EPI_ISL_3904534 | 2021-09-02      |
| hCoV-19/Japan/PG-82089/2021 | EPI_ISL_3904535 | 2021-09-02      |
| hCoV-19/Japan/PG-82090/2021 | EPI_ISL_3904536 | 2021-09-02      |
| hCoV-19/Japan/PG-82091/2021 | EPI_ISL_3904537 | 2021-09-02      |
| hCoV-19/Japan/PG-82092/2021 | EPI_ISL_3904538 | 2021-09-02      |
| hCoV-19/Japan/PG-82093/2021 | EPI_ISL_3904539 | 2021-09-02      |
| hCoV-19/Japan/PG-82094/2021 | EPI_ISL_3904540 | 2021-09-02      |
| hCoV-19/Japan/PG-82095/2021 | EPI_ISL_3904541 | 2021-09-02      |
| hCoV-19/Japan/PG-82096/2021 | EPI_ISL_3904542 | 2021-09-02      |
| hCoV-19/Japan/PG-82097/2021 | EPI_ISL_3904543 | 2021-09-02      |

| virus_name                  | epiID           | submission_date |
|-----------------------------|-----------------|-----------------|
| hCoV-19/Japan/PG-82098/2021 | EPI_ISL_3904544 | 2021-09-02      |
| hCoV-19/Japan/PG-82099/2021 | EPI_ISL_3904545 | 2021-09-02      |
| hCoV-19/Japan/PG-82100/2021 | EPI_ISL_3894574 | 2021-09-02      |
| hCoV-19/Japan/PG-82101/2021 | EPI_ISL_3894575 | 2021-09-02      |
| hCoV-19/Japan/PG-82102/2021 | EPI_ISL_3894576 | 2021-09-02      |
| hCoV-19/Japan/PG-82103/2021 | EPI_ISL_3894577 | 2021-09-02      |
| hCoV-19/Japan/PG-82104/2021 | EPI_ISL_3894578 | 2021-09-02      |
| hCoV-19/Japan/PG-82105/2021 | EPI_ISL_3894579 | 2021-09-02      |
| hCoV-19/Japan/PG-82106/2021 | EPI_ISL_3894580 | 2021-09-02      |
| hCoV-19/Japan/PG-82107/2021 | EPI_ISL_3894581 | 2021-09-02      |
| hCoV-19/Japan/PG-82108/2021 | EPI_ISL_3894582 | 2021-09-02      |
| hCoV-19/Japan/PG-82109/2021 | EPI_ISL_3894583 | 2021-09-02      |
| hCoV-19/Japan/PG-82110/2021 | EPI_ISL_3894584 | 2021-09-02      |
| hCoV-19/Japan/PG-82111/2021 | EPI_ISL_3894585 | 2021-09-02      |
| hCoV-19/Japan/PG-82112/2021 | EPI_ISL_3894586 | 2021-09-02      |
| hCoV-19/Japan/PG-82113/2021 | EPI_ISL_3894587 | 2021-09-02      |
| hCoV-19/Japan/PG-82114/2021 | EPI_ISL_3894588 | 2021-09-02      |
| hCoV-19/Japan/PG-82115/2021 | EPI_ISL_3894589 | 2021-09-02      |
| hCoV-19/Japan/PG-82116/2021 | EPI_ISL_3894590 | 2021-09-02      |
| hCoV-19/Japan/PG-82117/2021 | EPI_ISL_3894591 | 2021-09-02      |
| hCoV-19/Japan/PG-82118/2021 | EPI_ISL_3894592 | 2021-09-02      |
| hCoV-19/Japan/PG-82119/2021 | EPI_ISL_3894593 | 2021-09-02      |
| hCoV-19/Japan/PG-82120/2021 | EPI_ISL_3894594 | 2021-09-02      |
| hCoV-19/Japan/PG-82121/2021 | EPI_ISL_3894595 | 2021-09-02      |
| hCoV-19/Japan/PG-82122/2021 | EPI_ISL_3894596 | 2021-09-02      |
| hCoV-19/Japan/PG-82123/2021 | EPI_ISL_3894597 | 2021-09-02      |
| hCoV-19/Japan/PG-82124/2021 | EPI_ISL_3894598 | 2021-09-02      |
| hCoV-19/Japan/PG-82125/2021 | EPI_ISL_3894599 | 2021-09-02      |
| hCoV-19/Japan/PG-82126/2021 | EPI_ISL_3894600 | 2021-09-02      |
| hCoV-19/Japan/PG-82127/2021 | EPI_ISL_3894601 | 2021-09-02      |
| hCoV-19/Japan/PG-82128/2021 | EPI_ISL_3894602 | 2021-09-02      |
| hCoV-19/Japan/PG-82129/2021 | EPI_ISL_3894603 | 2021-09-02      |
| hCoV-19/Japan/PG-82130/2021 | EPI_ISL_3894604 | 2021-09-02      |
| hCoV-19/Japan/PG-82131/2021 | EPI_ISL_3894605 | 2021-09-02      |
| hCoV-19/Japan/PG-82132/2021 | EPI_ISL_3894606 | 2021-09-02      |
| hCoV-19/Japan/PG-82133/2021 | EPI_ISL_3894607 | 2021-09-02      |
| hCoV-19/Japan/PG-82134/2021 | EPI_ISL_3894608 | 2021-09-02      |
| hCoV-19/Japan/PG-82135/2021 | EPI_ISL_3894609 | 2021-09-02      |
| hCoV-19/Japan/PG-82136/2021 | EPI_ISL_3894610 | 2021-09-02      |
| hCoV-19/Japan/PG-82137/2021 | EPI_ISL_3894611 | 2021-09-02      |
| hCoV-19/Japan/PG-82138/2021 | EPI_ISL_3894612 | 2021-09-02      |
| hCoV-19/Japan/PG-82139/2021 | EPI_ISL_3894613 | 2021-09-02      |
| hCoV-19/Japan/PG-82140/2021 | EPI_ISL_3894614 | 2021-09-02      |
| hCoV-19/Japan/PG-82141/2021 | EPI_ISL_3894615 | 2021-09-02      |
| hCoV-19/Japan/PG-82142/2021 | EPI_ISL_3894616 | 2021-09-02      |
| hCoV-19/Japan/PG-82143/2021 | EPI_ISL_3894617 | 2021-09-02      |
| hCoV-19/Japan/PG-82144/2021 | EPI_ISL_3894618 | 2021-09-02      |
| hCoV-19/Japan/PG-82145/2021 | EPI_ISL_3894619 | 2021-09-02      |
| hCoV-19/Japan/PG-82146/2021 | EPI_ISL_3894620 | 2021-09-02      |
| hCoV-19/Japan/PG-82147/2021 | EPI_ISL_3894621 | 2021-09-02      |
| hCoV-19/Japan/PG-82148/2021 | EPI_ISL_3894622 | 2021-09-02      |
| hCoV-19/Japan/PG-82149/2021 | EPI_ISL_3894623 | 2021-09-02      |
| hCoV-19/Japan/PG-82150/2021 | EPI_ISL_3894624 | 2021-09-02      |
| hCoV-19/Japan/PG-82151/2021 | EPI_ISL_3894625 | 2021-09-02      |

| virus_name                  | epiID           | submission_date |
|-----------------------------|-----------------|-----------------|
| hCoV-19/Japan/PG-82152/2021 | EPI_ISL_3894626 | 2021-09-02      |
| hCoV-19/Japan/PG-82153/2021 | EPI_ISL_3894627 | 2021-09-02      |
| hCoV-19/Japan/PG-82154/2021 | EPI_ISL_3894628 | 2021-09-02      |
| hCoV-19/Japan/PG-82155/2021 | EPI_ISL_3894629 | 2021-09-02      |
| hCoV-19/Japan/PG-82156/2021 | EPI_ISL_3894630 | 2021-09-02      |
| hCoV-19/Japan/PG-82157/2021 | EPI_ISL_3894631 | 2021-09-02      |
| hCoV-19/Japan/PG-82158/2021 | EPI_ISL_3894632 | 2021-09-02      |
| hCoV-19/Japan/PG-82159/2021 | EPI_ISL_3894633 | 2021-09-02      |
| hCoV-19/Japan/PG-82160/2021 | EPI_ISL_3894634 | 2021-09-02      |
| hCoV-19/Japan/PG-82161/2021 | EPI_ISL_3894635 | 2021-09-02      |
| hCoV-19/Japan/PG-82162/2021 | EPI_ISL_3894636 | 2021-09-02      |
| hCoV-19/Japan/PG-82163/2021 | EPI_ISL_3894637 | 2021-09-02      |
| hCoV-19/Japan/PG-82164/2021 | EPI_ISL_3894638 | 2021-09-02      |
| hCoV-19/Japan/PG-82165/2021 | EPI_ISL_3894639 | 2021-09-02      |
| hCoV-19/Japan/PG-82166/2021 | EPI_ISL_3894640 | 2021-09-02      |
| hCoV-19/Japan/PG-82167/2021 | EPI_ISL_3894641 | 2021-09-02      |
| hCoV-19/Japan/PG-82168/2021 | EPI_ISL_3894642 | 2021-09-02      |
| hCoV-19/Japan/PG-82169/2021 | EPI_ISL_3894643 | 2021-09-02      |
| hCoV-19/Japan/PG-82170/2021 | EPI_ISL_3894644 | 2021-09-02      |
| hCoV-19/Japan/PG-82171/2021 | EPI_ISL_3894645 | 2021-09-02      |
| hCoV-19/Japan/PG-82172/2021 | EPI_ISL_3894646 | 2021-09-02      |
| hCoV-19/Japan/PG-82173/2021 | EPI_ISL_3894647 | 2021-09-02      |
| hCoV-19/Japan/PG-82174/2021 | EPI_ISL_3894648 | 2021-09-02      |
| hCoV-19/Japan/PG-82175/2021 | EPI_ISL_3894649 | 2021-09-02      |
| hCoV-19/Japan/PG-82176/2021 | EPI_ISL_3894650 | 2021-09-02      |
| hCoV-19/Japan/PG-82177/2021 | EPI_ISL_3894651 | 2021-09-02      |
| hCoV-19/Japan/PG-82178/2021 | EPI_ISL_3894652 | 2021-09-02      |
| hCoV-19/Japan/PG-82179/2021 | EPI_ISL_3894653 | 2021-09-02      |
| hCoV-19/Japan/PG-82180/2021 | EPI_ISL_3894654 | 2021-09-02      |
| hCoV-19/Japan/PG-82181/2021 | EPI_ISL_3894655 | 2021-09-02      |
| hCoV-19/Japan/PG-82182/2021 | EPI_ISL_3894656 | 2021-09-02      |
| hCoV-19/Japan/PG-82183/2021 | EPI_ISL_3894657 | 2021-09-02      |
| hCoV-19/Japan/PG-82184/2021 | EPI_ISL_3894658 | 2021-09-02      |
| hCoV-19/Japan/PG-82185/2021 | EPI_ISL_3894659 | 2021-09-02      |
| hCoV-19/Japan/PG-82186/2021 | EPI_ISL_3894660 | 2021-09-02      |
| hCoV-19/Japan/PG-82187/2021 | EPI_ISL_3894661 | 2021-09-02      |
| hCoV-19/Japan/PG-82188/2021 | EPI_ISL_3894662 | 2021-09-02      |
| hCoV-19/Japan/PG-82189/2021 | EPI_ISL_3894663 | 2021-09-02      |
| hCoV-19/Japan/PG-82190/2021 | EPI_ISL_3894664 | 2021-09-02      |
| hCoV-19/Japan/PG-82191/2021 | EPI_ISL_3894665 | 2021-09-02      |
| hCoV-19/Japan/PG-82192/2021 | EPI_ISL_3894666 | 2021-09-02      |
| hCoV-19/Japan/PG-82193/2021 | EPI_ISL_3894667 | 2021-09-02      |
| hCoV-19/Japan/PG-82194/2021 | EPI_ISL_3894668 | 2021-09-02      |
| hCoV-19/Japan/PG-82195/2021 | EPI_ISL_3894669 | 2021-09-02      |
| hCoV-19/Japan/PG-82196/2021 | EPI_ISL_3894670 | 2021-09-02      |
| hCoV-19/Japan/PG-82197/2021 | EPI_ISL_3894671 | 2021-09-02      |
| hCoV-19/Japan/PG-82198/2021 | EPI_ISL_3894672 | 2021-09-02      |
| hCoV-19/Japan/PG-82199/2021 | EPI_ISL_3894673 | 2021-09-02      |
| hCoV-19/Japan/PG-82200/2021 | EPI_ISL_3894674 | 2021-09-02      |
| hCoV-19/Japan/PG-82201/2021 | EPI_ISL_3894675 | 2021-09-02      |
| hCoV-19/Japan/PG-82202/2021 | EPI_ISL_3894676 | 2021-09-02      |
| hCoV-19/Japan/PG-82203/2021 | EPI_ISL_3894677 | 2021-09-02      |
| hCoV-19/Japan/PG-82204/2021 | EPI_ISL_3894678 | 2021-09-02      |
| hCoV-19/Japan/PG-82205/2021 | EPI_ISL_3894679 | 2021-09-02      |

| virus_name                  | epiID           | submission_date |
|-----------------------------|-----------------|-----------------|
| hCoV-19/Japan/PG-82206/2021 | EPI_ISL_3894680 | 2021-09-02      |
| hCoV-19/Japan/PG-82207/2021 | EPI_ISL_3894681 | 2021-09-02      |
| hCoV-19/Japan/PG-82208/2021 | EPI_ISL_3894682 | 2021-09-02      |
| hCoV-19/Japan/PG-82209/2021 | EPI_ISL_3894683 | 2021-09-02      |
| hCoV-19/Japan/PG-82210/2021 | EPI_ISL_3894684 | 2021-09-02      |
| hCoV-19/Japan/PG-82211/2021 | EPI_ISL_3894685 | 2021-09-02      |
| hCoV-19/Japan/PG-82212/2021 | EPI_ISL_3894686 | 2021-09-02      |
| hCoV-19/Japan/PG-82213/2021 | EPI_ISL_3894687 | 2021-09-02      |
| hCoV-19/Japan/PG-82214/2021 | EPI_ISL_3894688 | 2021-09-02      |
| hCoV-19/Japan/PG-82215/2021 | EPI_ISL_3894689 | 2021-09-02      |
| hCoV-19/Japan/PG-82216/2021 | EPI_ISL_3894690 | 2021-09-02      |
| hCoV-19/Japan/PG-82217/2021 | EPI_ISL_3894691 | 2021-09-02      |
| hCoV-19/Japan/PG-82218/2021 | EPI_ISL_3894692 | 2021-09-02      |
| hCoV-19/Japan/PG-82219/2021 | EPI_ISL_3894693 | 2021-09-02      |
| hCoV-19/Japan/PG-82220/2021 | EPI_ISL_3894694 | 2021-09-02      |
| hCoV-19/Japan/PG-82221/2021 | EPI_ISL_3894695 | 2021-09-02      |
| hCoV-19/Japan/PG-82222/2021 | EPI_ISL_3894696 | 2021-09-02      |
| hCoV-19/Japan/PG-82223/2021 | EPI_ISL_3894697 | 2021-09-02      |
| hCoV-19/Japan/PG-82224/2021 | EPI_ISL_3894698 | 2021-09-02      |
| hCoV-19/Japan/PG-82225/2021 | EPI_ISL_3894699 | 2021-09-02      |
| hCoV-19/Japan/PG-82226/2021 | EPI_ISL_3894700 | 2021-09-02      |
| hCoV-19/Japan/PG-82227/2021 | EPI_ISL_3894701 | 2021-09-02      |
| hCoV-19/Japan/PG-82228/2021 | EPI_ISL_3894702 | 2021-09-02      |
| hCoV-19/Japan/PG-82229/2021 | EPI_ISL_3894703 | 2021-09-02      |
| hCoV-19/Japan/PG-82230/2021 | EPI_ISL_3894704 | 2021-09-02      |
| hCoV-19/Japan/PG-82231/2021 | EPI_ISL_3894705 | 2021-09-02      |
| hCoV-19/Japan/PG-82232/2021 | EPI_ISL_3894706 | 2021-09-02      |
| hCoV-19/Japan/PG-82233/2021 | EPI_ISL_3894707 | 2021-09-02      |
| hCoV-19/Japan/PG-82234/2021 | EPI_ISL_3894708 | 2021-09-02      |
| hCoV-19/Japan/PG-82235/2021 | EPI_ISL_3894709 | 2021-09-02      |
| hCoV-19/Japan/PG-82236/2021 | EPI_ISL_3894710 | 2021-09-02      |
| hCoV-19/Japan/PG-82237/2021 | EPI_ISL_3894711 | 2021-09-02      |
| hCoV-19/Japan/PG-82238/2021 | EPI_ISL_3894712 | 2021-09-02      |
| hCoV-19/Japan/PG-82239/2021 | EPI_ISL_3894713 | 2021-09-02      |
| hCoV-19/Japan/PG-82240/2021 | EPI_ISL_3894714 | 2021-09-02      |
| hCoV-19/Japan/PG-82241/2021 | EPI_ISL_3894715 | 2021-09-02      |
| hCoV-19/Japan/PG-82242/2021 | EPI_ISL_3894716 | 2021-09-02      |
| hCoV-19/Japan/PG-82243/2021 | EPI_ISL_3894717 | 2021-09-02      |
| hCoV-19/Japan/PG-82244/2021 | EPI_ISL_3894718 | 2021-09-02      |
| hCoV-19/Japan/PG-82245/2021 | EPI_ISL_3894719 | 2021-09-02      |
| hCoV-19/Japan/PG-82246/2021 | EPI_ISL_3894720 | 2021-09-02      |
| hCoV-19/Japan/PG-82247/2021 | EPI_ISL_3894721 | 2021-09-02      |
| hCoV-19/Japan/PG-82248/2021 | EPI_ISL_3894722 | 2021-09-02      |
| hCoV-19/Japan/PG-82249/2021 | EPI_ISL_3894723 | 2021-09-02      |
| hCoV-19/Japan/PG-82250/2021 | EPI_ISL_3894724 | 2021-09-02      |
| hCoV-19/Japan/PG-82251/2021 | EPI_ISL_3894725 | 2021-09-02      |
| hCoV-19/Japan/PG-82252/2021 | EPI_ISL_3894726 | 2021-09-02      |
| hCoV-19/Japan/PG-82253/2021 | EPI_ISL_3894727 | 2021-09-02      |
| hCoV-19/Japan/PG-82254/2021 | EPI_ISL_3894728 | 2021-09-02      |
| hCoV-19/Japan/PG-82255/2021 | EPI_ISL_3894729 | 2021-09-02      |
| hCoV-19/Japan/PG-82256/2021 | EPI_ISL_3894730 | 2021-09-02      |
| hCoV-19/Japan/PG-82257/2021 | EPI_ISL_3894731 | 2021-09-02      |
| hCoV-19/Japan/PG-82258/2021 | EPI_ISL_3894732 | 2021-09-02      |
| hCoV-19/Japan/PG-82259/2021 | EPI_ISL_3894733 | 2021-09-02      |

| virus_name                  | epiID           | submission_date |
|-----------------------------|-----------------|-----------------|
| hCoV-19/Japan/PG-82260/2021 | EPI_ISL_3894734 | 2021-09-02      |
| hCoV-19/Japan/PG-82261/2021 | EPI_ISL_3894735 | 2021-09-02      |
| hCoV-19/Japan/PG-82262/2021 | EPI_ISL_3894736 | 2021-09-02      |
| hCoV-19/Japan/PG-82263/2021 | EPI_ISL_3894737 | 2021-09-02      |
| hCoV-19/Japan/PG-82264/2021 | EPI_ISL_3894738 | 2021-09-02      |
| hCoV-19/Japan/PG-82265/2021 | EPI_ISL_3894739 | 2021-09-02      |
| hCoV-19/Japan/PG-82266/2021 | EPI_ISL_3894740 | 2021-09-02      |
| hCoV-19/Japan/PG-82267/2021 | EPI_ISL_3894741 | 2021-09-02      |
| hCoV-19/Japan/PG-82268/2021 | EPI_ISL_3894742 | 2021-09-02      |
| hCoV-19/Japan/PG-82269/2021 | EPI_ISL_3894743 | 2021-09-02      |
| hCoV-19/Japan/PG-82270/2021 | EPI_ISL_3894744 | 2021-09-02      |
| hCoV-19/Japan/PG-82271/2021 | EPI_ISL_3894745 | 2021-09-02      |
| hCoV-19/Japan/PG-82272/2021 | EPI_ISL_3894746 | 2021-09-02      |
| hCoV-19/Japan/PG-82273/2021 | EPI_ISL_3894747 | 2021-09-02      |
| hCoV-19/Japan/PG-82274/2021 | EPI_ISL_3894748 | 2021-09-02      |
| hCoV-19/Japan/PG-82275/2021 | EPI_ISL_3894749 | 2021-09-02      |
| hCoV-19/Japan/PG-82276/2021 | EPI_ISL_3894750 | 2021-09-02      |
| hCoV-19/Japan/PG-82277/2021 | EPI_ISL_3894751 | 2021-09-02      |
| hCoV-19/Japan/PG-82278/2021 | EPI_ISL_3894752 | 2021-09-02      |
| hCoV-19/Japan/PG-82279/2021 | EPI_ISL_3894753 | 2021-09-02      |
| hCoV-19/Japan/PG-82280/2021 | EPI_ISL_3894754 | 2021-09-02      |
| hCoV-19/Japan/PG-82281/2021 | EPI_ISL_3894755 | 2021-09-02      |
| hCoV-19/Japan/PG-82282/2021 | EPI_ISL_3894756 | 2021-09-02      |
| hCoV-19/Japan/PG-82283/2021 | EPI_ISL_3894757 | 2021-09-02      |
| hCoV-19/Japan/PG-82284/2021 | EPI_ISL_3894758 | 2021-09-02      |
| hCoV-19/Japan/PG-82285/2021 | EPI_ISL_3894759 | 2021-09-02      |
| hCoV-19/Japan/PG-82286/2021 | EPI_ISL_3894760 | 2021-09-02      |
| hCoV-19/Japan/PG-82287/2021 | EPI_ISL_3894761 | 2021-09-02      |
| hCoV-19/Japan/PG-82288/2021 | EPI_ISL_3894762 | 2021-09-02      |
| hCoV-19/Japan/PG-82289/2021 | EPI_ISL_3894763 | 2021-09-02      |
| hCoV-19/Japan/PG-82290/2021 | EPI_ISL_3894764 | 2021-09-02      |
| hCoV-19/Japan/PG-82291/2021 | EPI_ISL_3894765 | 2021-09-02      |
| hCoV-19/Japan/PG-82292/2021 | EPI_ISL_3894766 | 2021-09-02      |
| hCoV-19/Japan/PG-82293/2021 | EPI_ISL_3894767 | 2021-09-02      |
| hCoV-19/Japan/PG-82294/2021 | EPI_ISL_3894768 | 2021-09-02      |
| hCoV-19/Japan/PG-82295/2021 | EPI_ISL_3894769 | 2021-09-02      |
| hCoV-19/Japan/PG-82296/2021 | EPI_ISL_3894770 | 2021-09-02      |
| hCoV-19/Japan/PG-82297/2021 | EPI_ISL_3894771 | 2021-09-02      |
| hCoV-19/Japan/PG-82298/2021 | EPI_ISL_3894772 | 2021-09-02      |
| hCoV-19/Japan/PG-82299/2021 | EPI_ISL_3894773 | 2021-09-02      |
| hCoV-19/Japan/PG-82300/2021 | EPI_ISL_3894774 | 2021-09-02      |
| hCoV-19/Japan/PG-82301/2021 | EPI_ISL_3894775 | 2021-09-02      |
| hCoV-19/Japan/PG-82302/2021 | EPI_ISL_3894776 | 2021-09-02      |
| hCoV-19/Japan/PG-82303/2021 | EPI_ISL_3894777 | 2021-09-02      |
| hCoV-19/Japan/PG-82304/2021 | EPI_ISL_3894778 | 2021-09-02      |
| hCoV-19/Japan/PG-82305/2021 | EPI_ISL_3894779 | 2021-09-02      |
| hCoV-19/Japan/PG-82306/2021 | EPI_ISL_3894780 | 2021-09-02      |
| hCoV-19/Japan/PG-82307/2021 | EPI_ISL_3894781 | 2021-09-02      |
| hCoV-19/Japan/PG-82308/2021 | EPI_ISL_3894782 | 2021-09-02      |
| hCoV-19/Japan/PG-82309/2021 | EPI_ISL_3894783 | 2021-09-02      |
| hCoV-19/Japan/PG-82310/2021 | EPI_ISL_3894784 | 2021-09-02      |
| hCoV-19/Japan/PG-82311/2021 | EPI_ISL_3894785 | 2021-09-02      |
| hCoV-19/Japan/PG-82312/2021 | EPI_ISL_3894786 | 2021-09-02      |
| hCoV-19/Japan/PG-82313/2021 | EPI_ISL_3894787 | 2021-09-02      |

| virus_name                  | epiID           | submission_date |
|-----------------------------|-----------------|-----------------|
| hCoV-19/Japan/PG-82314/2021 | EPI_ISL_3894788 | 2021-09-02      |
| hCoV-19/Japan/PG-82315/2021 | EPI_ISL_3894789 | 2021-09-02      |
| hCoV-19/Japan/PG-82316/2021 | EPI_ISL_3894790 | 2021-09-02      |
| hCoV-19/Japan/PG-82317/2021 | EPI_ISL_3894791 | 2021-09-02      |
| hCoV-19/Japan/PG-82318/2021 | EPI_ISL_3894792 | 2021-09-02      |
| hCoV-19/Japan/PG-82319/2021 | EPI_ISL_3894793 | 2021-09-02      |
| hCoV-19/Japan/PG-82320/2021 | EPI_ISL_3894794 | 2021-09-02      |
| hCoV-19/Japan/PG-82321/2021 | EPI_ISL_3894795 | 2021-09-02      |
| hCoV-19/Japan/PG-82322/2021 | EPI_ISL_3894796 | 2021-09-02      |
| hCoV-19/Japan/PG-82323/2021 | EPI_ISL_3894797 | 2021-09-02      |
| hCoV-19/Japan/PG-82324/2021 | EPI_ISL_3894798 | 2021-09-02      |
| hCoV-19/Japan/PG-82325/2021 | EPI_ISL_3894799 | 2021-09-02      |
| hCoV-19/Japan/PG-82326/2021 | EPI_ISL_3894800 | 2021-09-02      |
| hCoV-19/Japan/PG-82327/2021 | EPI_ISL_3894801 | 2021-09-02      |
| hCoV-19/Japan/PG-82328/2021 | EPI_ISL_3894802 | 2021-09-02      |
| hCoV-19/Japan/PG-82329/2021 | EPI_ISL_3894803 | 2021-09-02      |
| hCoV-19/Japan/PG-82330/2021 | EPI_ISL_3894804 | 2021-09-02      |
| hCoV-19/Japan/PG-82331/2021 | EPI_ISL_3894805 | 2021-09-02      |
| hCoV-19/Japan/PG-82332/2021 | EPI_ISL_3894806 | 2021-09-02      |
| hCoV-19/Japan/PG-82333/2021 | EPI_ISL_3894807 | 2021-09-02      |
| hCoV-19/Japan/PG-82334/2021 | EPI_ISL_3894808 | 2021-09-02      |
| hCoV-19/Japan/PG-82335/2021 | EPI_ISL_3894809 | 2021-09-02      |
| hCoV-19/Japan/PG-82336/2021 | EPI_ISL_3894810 | 2021-09-02      |
| hCoV-19/Japan/PG-82337/2021 | EPI_ISL_3894811 | 2021-09-02      |
| hCoV-19/Japan/PG-82338/2021 | EPI_ISL_3894812 | 2021-09-02      |
| hCoV-19/Japan/PG-82339/2021 | EPI_ISL_3894813 | 2021-09-02      |
| hCoV-19/Japan/PG-82340/2021 | EPI_ISL_3894814 | 2021-09-02      |
| hCoV-19/Japan/PG-82341/2021 | EPI_ISL_3894815 | 2021-09-02      |
| hCoV-19/Japan/PG-82342/2021 | EPI_ISL_3894816 | 2021-09-02      |
| hCoV-19/Japan/PG-82343/2021 | EPI_ISL_3894817 | 2021-09-02      |
| hCoV-19/Japan/PG-82344/2021 | EPI_ISL_3894818 | 2021-09-02      |
| hCoV-19/Japan/PG-82345/2021 | EPI_ISL_3894819 | 2021-09-02      |
| hCoV-19/Japan/PG-82346/2021 | EPI_ISL_3894820 | 2021-09-02      |
| hCoV-19/Japan/PG-82347/2021 | EPI_ISL_3894821 | 2021-09-02      |
| hCoV-19/Japan/PG-82348/2021 | EPI_ISL_3894822 | 2021-09-02      |
| hCoV-19/Japan/PG-82349/2021 | EPI_ISL_3894823 | 2021-09-02      |
| hCoV-19/Japan/PG-82350/2021 | EPI_ISL_3894824 | 2021-09-02      |
| hCoV-19/Japan/PG-82351/2021 | EPI_ISL_3894825 | 2021-09-02      |
| hCoV-19/Japan/PG-82352/2021 | EPI_ISL_3894826 | 2021-09-02      |
| hCoV-19/Japan/PG-82353/2021 | EPI_ISL_3894827 | 2021-09-02      |
| hCoV-19/Japan/PG-82354/2021 | EPI_ISL_3894828 | 2021-09-02      |
| hCoV-19/Japan/PG-82355/2021 | EPI_ISL_3894829 | 2021-09-02      |
| hCoV-19/Japan/PG-82356/2021 | EPI_ISL_3894830 | 2021-09-02      |
| hCoV-19/Japan/PG-82357/2021 | EPI_ISL_3894831 | 2021-09-02      |
| hCoV-19/Japan/PG-82358/2021 | EPI_ISL_3894832 | 2021-09-02      |
| hCoV-19/Japan/PG-82359/2021 | EPI_ISL_3894833 | 2021-09-02      |
| hCoV-19/Japan/PG-82360/2021 | EPI_ISL_3894834 | 2021-09-02      |
| hCoV-19/Japan/PG-82361/2021 | EPI_ISL_3894835 | 2021-09-02      |
| hCoV-19/Japan/PG-82362/2021 | EPI_ISL_3894836 | 2021-09-02      |
| hCoV-19/Japan/PG-82363/2021 | EPI_ISL_3894837 | 2021-09-02      |
| hCoV-19/Japan/PG-82364/2021 | EPI_ISL_3894838 | 2021-09-02      |
| hCoV-19/Japan/PG-82365/2021 | EPI_ISL_3894839 | 2021-09-02      |
| hCoV-19/Japan/PG-82366/2021 | EPI_ISL_3894840 | 2021-09-02      |
| hCoV-19/Japan/PG-82367/2021 | EPI_ISL_3894841 | 2021-09-02      |

| virus_name                  | epiID           | submission_date |
|-----------------------------|-----------------|-----------------|
| hCoV-19/Japan/PG-82368/2021 | EPI_ISL_3894842 | 2021-09-02      |
| hCoV-19/Japan/PG-82369/2021 | EPI_ISL_3894843 | 2021-09-02      |
| hCoV-19/Japan/PG-82370/2021 | EPI_ISL_3894844 | 2021-09-02      |
| hCoV-19/Japan/PG-82371/2021 | EPI_ISL_3894845 | 2021-09-02      |
| hCoV-19/Japan/PG-82372/2021 | EPI_ISL_3894846 | 2021-09-02      |
| hCoV-19/Japan/PG-82373/2021 | EPI_ISL_3894847 | 2021-09-02      |
| hCoV-19/Japan/PG-82374/2021 | EPI_ISL_3894848 | 2021-09-02      |
| hCoV-19/Japan/PG-82375/2021 | EPI_ISL_3894849 | 2021-09-02      |
| hCoV-19/Japan/PG-82376/2021 | EPI_ISL_3894850 | 2021-09-02      |
| hCoV-19/Japan/PG-82377/2021 | EPI_ISL_3894851 | 2021-09-02      |
| hCoV-19/Japan/PG-82378/2021 | EPI_ISL_3894852 | 2021-09-02      |
| hCoV-19/Japan/PG-82379/2021 | EPI_ISL_3894853 | 2021-09-02      |
| hCoV-19/Japan/PG-82380/2021 | EPI_ISL_3894854 | 2021-09-02      |
| hCoV-19/Japan/PG-82381/2021 | EPI_ISL_3894855 | 2021-09-02      |
| hCoV-19/Japan/PG-82382/2021 | EPI_ISL_3894856 | 2021-09-02      |
| hCoV-19/Japan/PG-82383/2021 | EPI_ISL_3894857 | 2021-09-02      |
| hCoV-19/Japan/PG-82384/2021 | EPI_ISL_3894858 | 2021-09-02      |
| hCoV-19/Japan/PG-82385/2021 | EPI_ISL_3894859 | 2021-09-02      |
| hCoV-19/Japan/PG-82386/2021 | EPI_ISL_3894860 | 2021-09-02      |
| hCoV-19/Japan/PG-82387/2021 | EPI_ISL_3894861 | 2021-09-02      |
| hCoV-19/Japan/PG-82388/2021 | EPI_ISL_3894862 | 2021-09-02      |
| hCoV-19/Japan/PG-82389/2021 | EPI_ISL_3894863 | 2021-09-02      |
| hCoV-19/Japan/PG-82390/2021 | EPI_ISL_3894864 | 2021-09-02      |
| hCoV-19/Japan/PG-82391/2021 | EPI_ISL_3894865 | 2021-09-02      |
| hCoV-19/Japan/PG-82392/2021 | EPI_ISL_3894866 | 2021-09-02      |
| hCoV-19/Japan/PG-82393/2021 | EPI_ISL_3894867 | 2021-09-02      |
| hCoV-19/Japan/PG-82394/2021 | EPI_ISL_3894868 | 2021-09-02      |
| hCoV-19/Japan/PG-82395/2021 | EPI_ISL_3894869 | 2021-09-02      |
| hCoV-19/Japan/PG-82396/2021 | EPI_ISL_3894870 | 2021-09-02      |
| hCoV-19/Japan/PG-82397/2021 | EPI_ISL_3894871 | 2021-09-02      |
| hCoV-19/Japan/PG-82398/2021 | EPI_ISL_3894872 | 2021-09-02      |
| hCoV-19/Japan/PG-82399/2021 | EPI_ISL_3894873 | 2021-09-02      |
| hCoV-19/Japan/PG-82400/2021 | EPI_ISL_3894874 | 2021-09-02      |
| hCoV-19/Japan/PG-82401/2021 | EPI_ISL_3894875 | 2021-09-02      |
| hCoV-19/Japan/PG-82402/2021 | EPI_ISL_3894876 | 2021-09-02      |
| hCoV-19/Japan/PG-82403/2021 | EPI_ISL_3894877 | 2021-09-02      |
| hCoV-19/Japan/PG-82404/2021 | EPI_ISL_3894878 | 2021-09-02      |
| hCoV-19/Japan/PG-82405/2021 | EPI_ISL_3894879 | 2021-09-02      |
| hCoV-19/Japan/PG-82406/2021 | EPI_ISL_3894880 | 2021-09-02      |
| hCoV-19/Japan/PG-82407/2021 | EPI_ISL_3873806 | 2021-09-02      |
| hCoV-19/Japan/PG-82408/2021 | EPI_ISL_3873807 | 2021-09-02      |
| hCoV-19/Japan/PG-82409/2021 | EPI_ISL_3873808 | 2021-09-02      |
| hCoV-19/Japan/PG-82410/2021 | EPI_ISL_3873809 | 2021-09-02      |
| hCoV-19/Japan/PG-82411/2021 | EPI_ISL_3873810 | 2021-09-02      |
| hCoV-19/Japan/PG-82412/2021 | EPI_ISL_3873811 | 2021-09-02      |
| hCoV-19/Japan/PG-82413/2021 | EPI_ISL_3873812 | 2021-09-02      |
| hCoV-19/Japan/PG-82414/2021 | EPI_ISL_3873813 | 2021-09-02      |
| hCoV-19/Japan/PG-82415/2021 | EPI_ISL_3873814 | 2021-09-02      |
| hCoV-19/Japan/PG-82416/2021 | EPI_ISL_3873815 | 2021-09-02      |
| hCoV-19/Japan/PG-82417/2021 | EPI_ISL_3873816 | 2021-09-02      |
| hCoV-19/Japan/PG-82418/2021 | EPI_ISL_3873817 | 2021-09-02      |
| hCoV-19/Japan/PG-82419/2021 | EPI_ISL_3873818 | 2021-09-02      |
| hCoV-19/Japan/PG-82420/2021 | EPI_ISL_3873819 | 2021-09-02      |
| hCoV-19/Japan/PG-82421/2021 | EPI_ISL_3873820 | 2021-09-02      |

| virus_name                  | epiID           | submission_date |
|-----------------------------|-----------------|-----------------|
| hCoV-19/Japan/PG-82422/2021 | EPI_ISL_3873821 | 2021-09-02      |
| hCoV-19/Japan/PG-82423/2021 | EPI_ISL_3873822 | 2021-09-02      |
| hCoV-19/Japan/PG-82424/2021 | EPI_ISL_3873823 | 2021-09-02      |
| hCoV-19/Japan/PG-82425/2021 | EPI_ISL_3873824 | 2021-09-02      |
| hCoV-19/Japan/PG-82426/2021 | EPI_ISL_3873825 | 2021-09-02      |
| hCoV-19/Japan/PG-82427/2021 | EPI_ISL_3873826 | 2021-09-02      |
| hCoV-19/Japan/PG-82428/2021 | EPI_ISL_3873827 | 2021-09-02      |
| hCoV-19/Japan/PG-82429/2021 | EPI_ISL_3873828 | 2021-09-02      |
| hCoV-19/Japan/PG-82430/2021 | EPI_ISL_3873829 | 2021-09-02      |
| hCoV-19/Japan/PG-82431/2021 | EPI_ISL_3873830 | 2021-09-02      |
| hCoV-19/Japan/PG-82432/2021 | EPI_ISL_3873831 | 2021-09-02      |
| hCoV-19/Japan/PG-82433/2021 | EPI_ISL_3873832 | 2021-09-02      |
| hCoV-19/Japan/PG-82434/2021 | EPI_ISL_3873833 | 2021-09-02      |
| hCoV-19/Japan/PG-82435/2021 | EPI_ISL_3873834 | 2021-09-02      |
| hCoV-19/Japan/PG-82436/2021 | EPI_ISL_3873835 | 2021-09-02      |
| hCoV-19/Japan/PG-82437/2021 | EPI_ISL_3873836 | 2021-09-02      |
| hCoV-19/Japan/PG-82438/2021 | EPI_ISL_3873837 | 2021-09-02      |
| hCoV-19/Japan/PG-82439/2021 | EPI_ISL_3871074 | 2021-09-02      |
| hCoV-19/Japan/PG-82440/2021 | EPI_ISL_3871075 | 2021-09-02      |
| hCoV-19/Japan/PG-82441/2021 | EPI_ISL_3871076 | 2021-09-02      |
| hCoV-19/Japan/PG-82442/2021 | EPI_ISL_3871077 | 2021-09-02      |
| hCoV-19/Japan/PG-82443/2021 | EPI_ISL_3871078 | 2021-09-02      |
| hCoV-19/Japan/PG-82444/2021 | EPI_ISL_3871079 | 2021-09-02      |
| hCoV-19/Japan/PG-82445/2021 | EPI_ISL_3871080 | 2021-09-02      |
| hCoV-19/Japan/PG-82446/2021 | EPI_ISL_3871081 | 2021-09-02      |
| hCoV-19/Japan/PG-82447/2021 | EPI_ISL_3871082 | 2021-09-02      |
| hCoV-19/Japan/PG-82448/2021 | EPI_ISL_3871083 | 2021-09-02      |
| hCoV-19/Japan/PG-82449/2021 | EPI_ISL_3871084 | 2021-09-02      |
| hCoV-19/Japan/PG-82450/2021 | EPI_ISL_3871085 | 2021-09-02      |
| hCoV-19/Japan/PG-82451/2021 | EPI_ISL_3871086 | 2021-09-02      |
| hCoV-19/Japan/PG-82452/2021 | EPI_ISL_3871087 | 2021-09-02      |
| hCoV-19/Japan/PG-82453/2021 | EPI_ISL_3871088 | 2021-09-02      |
| hCoV-19/Japan/PG-82454/2021 | EPI_ISL_3871089 | 2021-09-02      |
| hCoV-19/Japan/PG-82455/2021 | EPI_ISL_3873393 | 2021-09-02      |
| hCoV-19/Japan/PG-82456/2021 | EPI_ISL_3873394 | 2021-09-02      |
| hCoV-19/Japan/PG-82457/2021 | EPI_ISL_3873395 | 2021-09-02      |
| hCoV-19/Japan/PG-82458/2021 | EPI_ISL_3873396 | 2021-09-02      |
| hCoV-19/Japan/PG-82459/2021 | EPI_ISL_3873397 | 2021-09-02      |
| hCoV-19/Japan/PG-82460/2021 | EPI_ISL_3873398 | 2021-09-02      |
| hCoV-19/Japan/PG-82461/2021 | EPI_ISL_3873399 | 2021-09-02      |
| hCoV-19/Japan/PG-82462/2021 | EPI_ISL_3873400 | 2021-09-02      |
| hCoV-19/Japan/PG-82463/2021 | EPI_ISL_3873401 | 2021-09-02      |
| hCoV-19/Japan/PG-82464/2021 | EPI_ISL_3873402 | 2021-09-02      |
| hCoV-19/Japan/PG-82465/2021 | EPI_ISL_3873403 | 2021-09-02      |
| hCoV-19/Japan/PG-82466/2021 | EPI_ISL_3873404 | 2021-09-02      |
| hCoV-19/Japan/PG-82467/2021 | EPI_ISL_3873405 | 2021-09-02      |
| hCoV-19/Japan/PG-82468/2021 | EPI_ISL_3873406 | 2021-09-02      |
| hCoV-19/Japan/PG-82469/2021 | EPI_ISL_3873407 | 2021-09-02      |
| hCoV-19/Japan/PG-82470/2021 | EPI_ISL_3873408 | 2021-09-02      |
| hCoV-19/Japan/PG-82471/2021 | EPI_ISL_3873409 | 2021-09-02      |
| hCoV-19/Japan/PG-82472/2021 | EPI_ISL_3873410 | 2021-09-02      |
| hCoV-19/Japan/PG-82473/2021 | EPI_ISL_3873411 | 2021-09-02      |
| hCoV-19/Japan/PG-82474/2021 | EPI_ISL_3873412 | 2021-09-02      |
| hCoV-19/Japan/PG-82475/2021 | EPI_ISL_3873413 | 2021-09-02      |



| virus_name                  | epiID           | submission_date |
|-----------------------------|-----------------|-----------------|
| hCoV-19/Japan/PG-82476/2021 | EPI_ISL_3873414 | 2021-09-02      |
| hCoV-19/Japan/PG-82477/2021 | EPI_ISL_3894881 | 2021-09-02      |
| hCoV-19/Japan/PG-82478/2021 | EPI_ISL_3894882 | 2021-09-02      |
| hCoV-19/Japan/PG-82479/2021 | EPI_ISL_3894883 | 2021-09-02      |
| hCoV-19/Japan/PG-82480/2021 | EPI_ISL_3894884 | 2021-09-02      |
| hCoV-19/Japan/PG-82481/2021 | EPI_ISL_3894885 | 2021-09-02      |
| hCoV-19/Japan/PG-82482/2021 | EPI_ISL_3894886 | 2021-09-02      |
| hCoV-19/Japan/PG-82483/2021 | EPI_ISL_3894887 | 2021-09-02      |
| hCoV-19/Japan/PG-82484/2021 | EPI_ISL_3894888 | 2021-09-02      |
| hCoV-19/Japan/PG-82485/2021 | EPI_ISL_3894889 | 2021-09-02      |
| hCoV-19/Japan/PG-82486/2021 | EPI_ISL_3894890 | 2021-09-02      |
| hCoV-19/Japan/PG-82487/2021 | EPI_ISL_3894891 | 2021-09-02      |
| hCoV-19/Japan/PG-82488/2021 | EPI_ISL_3894892 | 2021-09-02      |
| hCoV-19/Japan/PG-82489/2021 | EPI_ISL_3894893 | 2021-09-02      |
| hCoV-19/Japan/PG-82490/2021 | EPI_ISL_3894894 | 2021-09-02      |
| hCoV-19/Japan/PG-82491/2021 | EPI_ISL_3894895 | 2021-09-02      |
| hCoV-19/Japan/PG-82492/2021 | EPI_ISL_3894896 | 2021-09-02      |
| hCoV-19/Japan/PG-82493/2021 | EPI_ISL_3894897 | 2021-09-02      |
| hCoV-19/Japan/PG-82494/2021 | EPI_ISL_3894898 | 2021-09-02      |
| hCoV-19/Japan/PG-82495/2021 | EPI_ISL_3894899 | 2021-09-02      |
| hCoV-19/Japan/PG-82496/2021 | EPI_ISL_3894900 | 2021-09-02      |
| hCoV-19/Japan/PG-82497/2021 | EPI_ISL_3894901 | 2021-09-02      |
| hCoV-19/Japan/PG-82498/2021 | EPI_ISL_3894902 | 2021-09-02      |
| hCoV-19/Japan/PG-82499/2021 | EPI_ISL_3894903 | 2021-09-02      |
| hCoV-19/Japan/PG-82500/2021 | EPI_ISL_3894904 | 2021-09-02      |
| hCoV-19/Japan/PG-82501/2021 | EPI_ISL_3894905 | 2021-09-02      |
| hCoV-19/Japan/PG-82502/2021 | EPI_ISL_3894906 | 2021-09-02      |
| hCoV-19/Japan/PG-82503/2021 | EPI_ISL_3894907 | 2021-09-02      |
| hCoV-19/Japan/PG-82504/2021 | EPI_ISL_3894908 | 2021-09-02      |
| hCoV-19/Japan/PG-82505/2021 | EPI_ISL_3894909 | 2021-09-02      |
| hCoV-19/Japan/PG-82506/2021 | EPI_ISL_3894910 | 2021-09-02      |
| hCoV-19/Japan/PG-82507/2021 | EPI_ISL_3894911 | 2021-09-02      |
| hCoV-19/Japan/PG-82508/2021 | EPI_ISL_3894912 | 2021-09-02      |
| hCoV-19/Japan/PG-82509/2021 | EPI_ISL_3894913 | 2021-09-02      |
| hCoV-19/Japan/PG-82510/2021 | EPI_ISL_3894914 | 2021-09-02      |
| hCoV-19/Japan/PG-82511/2021 | EPI_ISL_3894915 | 2021-09-02      |
| hCoV-19/Japan/PG-82512/2021 | EPI_ISL_3894916 | 2021-09-02      |
| hCoV-19/Japan/PG-82513/2021 | EPI_ISL_3894917 | 2021-09-02      |
| hCoV-19/Japan/PG-82514/2021 | EPI_ISL_3894918 | 2021-09-02      |
| hCoV-19/Japan/PG-82515/2021 | EPI_ISL_3894919 | 2021-09-02      |
| hCoV-19/Japan/PG-82516/2021 | EPI_ISL_3894920 | 2021-09-02      |
| hCoV-19/Japan/PG-82517/2021 | EPI_ISL_3894921 | 2021-09-02      |
| hCoV-19/Japan/PG-82518/2021 | EPI_ISL_3894922 | 2021-09-02      |
| hCoV-19/Japan/PG-82519/2021 | EPI_ISL_3894923 | 2021-09-02      |
| hCoV-19/Japan/PG-82520/2021 | EPI_ISL_3894924 | 2021-09-02      |
| hCoV-19/Japan/PG-82521/2021 | EPI_ISL_3894925 | 2021-09-02      |
| hCoV-19/Japan/PG-82522/2021 | EPI_ISL_3894926 | 2021-09-02      |
| hCoV-19/Japan/PG-82523/2021 | EPI_ISL_3894927 | 2021-09-02      |
| hCoV-19/Japan/PG-82524/2021 | EPI_ISL_3894928 | 2021-09-02      |
| hCoV-19/Japan/PG-82525/2021 | EPI_ISL_3894929 | 2021-09-02      |
| hCoV-19/Japan/PG-82526/2021 | EPI_ISL_3894930 | 2021-09-02      |
| hCoV-19/Japan/PG-82527/2021 | EPI_ISL_3894931 | 2021-09-02      |
| hCoV-19/Japan/PG-82528/2021 | EPI_ISL_3894932 | 2021-09-02      |
| hCoV-19/Japan/PG-82529/2021 | EPI_ISL_3894933 | 2021-09-02      |

| virus_name                  | epiID           | submission_date |
|-----------------------------|-----------------|-----------------|
| hCoV-19/Japan/PG-82530/2021 | EPI_ISL_3894934 | 2021-09-02      |
| hCoV-19/Japan/PG-82531/2021 | EPI_ISL_3894935 | 2021-09-02      |
| hCoV-19/Japan/PG-82532/2021 | EPI_ISL_3894936 | 2021-09-02      |
| hCoV-19/Japan/PG-82533/2021 | EPI_ISL_3894937 | 2021-09-02      |
| hCoV-19/Japan/PG-82534/2021 | EPI_ISL_3894938 | 2021-09-02      |
| hCoV-19/Japan/PG-82535/2021 | EPI_ISL_3894939 | 2021-09-02      |
| hCoV-19/Japan/PG-82536/2021 | EPI_ISL_3894940 | 2021-09-02      |
| hCoV-19/Japan/PG-82537/2021 | EPI_ISL_3894941 | 2021-09-02      |
| hCoV-19/Japan/PG-82538/2021 | EPI_ISL_3894942 | 2021-09-02      |
| hCoV-19/Japan/PG-82539/2021 | EPI_ISL_3894943 | 2021-09-02      |
| hCoV-19/Japan/PG-82540/2021 | EPI_ISL_3894944 | 2021-09-02      |
| hCoV-19/Japan/PG-82541/2021 | EPI_ISL_3894945 | 2021-09-02      |
| hCoV-19/Japan/PG-82542/2021 | EPI_ISL_3894946 | 2021-09-02      |
| hCoV-19/Japan/PG-82543/2021 | EPI_ISL_3894947 | 2021-09-02      |
| hCoV-19/Japan/PG-82544/2021 | EPI_ISL_3894948 | 2021-09-02      |
| hCoV-19/Japan/PG-82545/2021 | EPI_ISL_3894949 | 2021-09-02      |
| hCoV-19/Japan/PG-82546/2021 | EPI_ISL_3894950 | 2021-09-02      |
| hCoV-19/Japan/PG-82547/2021 | EPI_ISL_3894951 | 2021-09-02      |
| hCoV-19/Japan/PG-82548/2021 | EPI_ISL_3894952 | 2021-09-02      |
| hCoV-19/Japan/PG-82549/2021 | EPI_ISL_3894953 | 2021-09-02      |
| hCoV-19/Japan/PG-82550/2021 | EPI_ISL_3894954 | 2021-09-02      |
| hCoV-19/Japan/PG-82551/2021 | EPI_ISL_3894955 | 2021-09-02      |
| hCoV-19/Japan/PG-82552/2021 | EPI_ISL_3894956 | 2021-09-02      |
| hCoV-19/Japan/PG-82553/2021 | EPI_ISL_3894957 | 2021-09-02      |
| hCoV-19/Japan/PG-82554/2021 | EPI_ISL_3894958 | 2021-09-02      |
| hCoV-19/Japan/PG-82555/2021 | EPI_ISL_3894959 | 2021-09-02      |
| hCoV-19/Japan/PG-82556/2021 | EPI_ISL_3894960 | 2021-09-02      |
| hCoV-19/Japan/PG-82557/2021 | EPI_ISL_3894961 | 2021-09-02      |
| hCoV-19/Japan/PG-82558/2021 | EPI_ISL_3894962 | 2021-09-02      |
| hCoV-19/Japan/PG-82559/2021 | EPI_ISL_3894963 | 2021-09-02      |
| hCoV-19/Japan/PG-82560/2021 | EPI_ISL_3894964 | 2021-09-02      |
| hCoV-19/Japan/PG-82561/2021 | EPI_ISL_3894965 | 2021-09-02      |
| hCoV-19/Japan/PG-82562/2021 | EPI_ISL_3894966 | 2021-09-02      |
| hCoV-19/Japan/PG-82563/2021 | EPI_ISL_3894967 | 2021-09-02      |
| hCoV-19/Japan/PG-82564/2021 | EPI_ISL_3894968 | 2021-09-02      |
| hCoV-19/Japan/PG-82565/2021 | EPI_ISL_3894969 | 2021-09-02      |
| hCoV-19/Japan/PG-82566/2021 | EPI_ISL_3894970 | 2021-09-02      |
| hCoV-19/Japan/PG-82567/2021 | EPI_ISL_3894971 | 2021-09-02      |
| hCoV-19/Japan/PG-82568/2021 | EPI_ISL_3894972 | 2021-09-02      |
| hCoV-19/Japan/PG-82569/2021 | EPI_ISL_3894973 | 2021-09-02      |
| hCoV-19/Japan/PG-82570/2021 | EPI_ISL_3894974 | 2021-09-02      |
| hCoV-19/Japan/PG-82571/2021 | EPI_ISL_3894975 | 2021-09-02      |
| hCoV-19/Japan/PG-82572/2021 | EPI_ISL_3894976 | 2021-09-02      |
| hCoV-19/Japan/PG-82573/2021 | EPI_ISL_3894977 | 2021-09-02      |
| hCoV-19/Japan/PG-82574/2021 | EPI_ISL_3894978 | 2021-09-02      |
| hCoV-19/Japan/PG-82575/2021 | EPI_ISL_3894979 | 2021-09-02      |
| hCoV-19/Japan/PG-82576/2021 | EPI_ISL_3894980 | 2021-09-02      |
| hCoV-19/Japan/PG-82577/2021 | EPI_ISL_3894981 | 2021-09-02      |
| hCoV-19/Japan/PG-82578/2021 | EPI_ISL_3894982 | 2021-09-02      |
| hCoV-19/Japan/PG-82579/2021 | EPI_ISL_3894983 | 2021-09-02      |
| hCoV-19/Japan/PG-82580/2021 | EPI_ISL_3894984 | 2021-09-02      |
| hCoV-19/Japan/PG-82581/2021 | EPI_ISL_3894985 | 2021-09-02      |
| hCoV-19/Japan/PG-82582/2021 | EPI_ISL_3894986 | 2021-09-02      |
| hCoV-19/Japan/PG-82583/2021 | EPI_ISL_3894987 | 2021-09-02      |

| virus_name                  | epiID           | submission_date |
|-----------------------------|-----------------|-----------------|
| hCoV-19/Japan/PG-82584/2021 | EPI_ISL_3894988 | 2021-09-02      |
| hCoV-19/Japan/PG-82585/2021 | EPI_ISL_3894989 | 2021-09-02      |
| hCoV-19/Japan/PG-82586/2021 | EPI_ISL_3894990 | 2021-09-02      |
| hCoV-19/Japan/PG-82587/2021 | EPI_ISL_3894991 | 2021-09-02      |
| hCoV-19/Japan/PG-82588/2021 | EPI_ISL_3894992 | 2021-09-02      |
| hCoV-19/Japan/PG-82589/2021 | EPI_ISL_3894993 | 2021-09-02      |
| hCoV-19/Japan/PG-82590/2021 | EPI_ISL_3894994 | 2021-09-02      |
| hCoV-19/Japan/PG-82591/2021 | EPI_ISL_3894995 | 2021-09-02      |
| hCoV-19/Japan/PG-82592/2021 | EPI_ISL_3894996 | 2021-09-02      |
| hCoV-19/Japan/PG-82593/2021 | EPI_ISL_3894997 | 2021-09-02      |
| hCoV-19/Japan/PG-82594/2021 | EPI_ISL_3894998 | 2021-09-02      |
| hCoV-19/Japan/PG-82595/2021 | EPI_ISL_3894999 | 2021-09-02      |
| hCoV-19/Japan/PG-82596/2021 | EPI_ISL_3895000 | 2021-09-02      |
| hCoV-19/Japan/PG-82597/2021 | EPI_ISL_3895001 | 2021-09-02      |
| hCoV-19/Japan/PG-82598/2021 | EPI_ISL_3895002 | 2021-09-02      |
| hCoV-19/Japan/PG-82599/2021 | EPI_ISL_3895003 | 2021-09-02      |
| hCoV-19/Japan/PG-82600/2021 | EPI_ISL_3895004 | 2021-09-02      |
| hCoV-19/Japan/PG-82601/2021 | EPI_ISL_3895005 | 2021-09-02      |
| hCoV-19/Japan/PG-82602/2021 | EPI_ISL_3895006 | 2021-09-02      |
| hCoV-19/Japan/PG-82603/2021 | EPI_ISL_3895007 | 2021-09-02      |
| hCoV-19/Japan/PG-82604/2021 | EPI_ISL_3895008 | 2021-09-02      |
| hCoV-19/Japan/PG-82605/2021 | EPI_ISL_3895009 | 2021-09-02      |
| hCoV-19/Japan/PG-82606/2021 | EPI_ISL_3895010 | 2021-09-02      |
| hCoV-19/Japan/PG-82607/2021 | EPI_ISL_3895011 | 2021-09-02      |
| hCoV-19/Japan/PG-82608/2021 | EPI_ISL_3895012 | 2021-09-02      |
| hCoV-19/Japan/PG-82609/2021 | EPI_ISL_3895013 | 2021-09-02      |
| hCoV-19/Japan/PG-82610/2021 | EPI_ISL_3895014 | 2021-09-02      |
| hCoV-19/Japan/PG-82611/2021 | EPI_ISL_3895015 | 2021-09-02      |
| hCoV-19/Japan/PG-82612/2021 | EPI_ISL_3895016 | 2021-09-02      |
| hCoV-19/Japan/PG-82613/2021 | EPI_ISL_3895017 | 2021-09-02      |
| hCoV-19/Japan/PG-82614/2021 | EPI_ISL_3895018 | 2021-09-02      |
| hCoV-19/Japan/PG-82615/2021 | EPI_ISL_3895019 | 2021-09-02      |
| hCoV-19/Japan/PG-82616/2021 | EPI_ISL_3895020 | 2021-09-02      |
| hCoV-19/Japan/PG-82617/2021 | EPI_ISL_3895021 | 2021-09-02      |
| hCoV-19/Japan/PG-82618/2021 | EPI_ISL_3895022 | 2021-09-02      |
| hCoV-19/Japan/PG-82619/2021 | EPI_ISL_3895023 | 2021-09-02      |
| hCoV-19/Japan/PG-82620/2021 | EPI_ISL_3895024 | 2021-09-02      |
| hCoV-19/Japan/PG-82621/2021 | EPI_ISL_3895025 | 2021-09-02      |
| hCoV-19/Japan/PG-82622/2021 | EPI_ISL_3895026 | 2021-09-02      |
| hCoV-19/Japan/PG-82623/2021 | EPI_ISL_3895027 | 2021-09-02      |
| hCoV-19/Japan/PG-82624/2021 | EPI_ISL_3895028 | 2021-09-02      |
| hCoV-19/Japan/PG-82625/2021 | EPI_ISL_3895029 | 2021-09-02      |
| hCoV-19/Japan/PG-82626/2021 | EPI_ISL_3895030 | 2021-09-02      |
| hCoV-19/Japan/PG-82627/2021 | EPI_ISL_3895031 | 2021-09-02      |
| hCoV-19/Japan/PG-82628/2021 | EPI_ISL_3895032 | 2021-09-02      |
| hCoV-19/Japan/PG-82629/2021 | EPI_ISL_3895033 | 2021-09-02      |
| hCoV-19/Japan/PG-82630/2021 | EPI_ISL_3895034 | 2021-09-02      |
| hCoV-19/Japan/PG-82631/2021 | EPI_ISL_3895035 | 2021-09-02      |
| hCoV-19/Japan/PG-82632/2021 | EPI_ISL_3895036 | 2021-09-02      |
| hCoV-19/Japan/PG-82633/2021 | EPI_ISL_3895037 | 2021-09-02      |
| hCoV-19/Japan/PG-82634/2021 | EPI_ISL_3895038 | 2021-09-02      |
| hCoV-19/Japan/PG-82635/2021 | EPI_ISL_3895039 | 2021-09-02      |
| hCoV-19/Japan/PG-82636/2021 | EPI_ISL_3895040 | 2021-09-02      |
| hCoV-19/Japan/PG-82637/2021 | EPI_ISL_3895041 | 2021-09-02      |

| virus_name                  | epiID           | submission_date |
|-----------------------------|-----------------|-----------------|
| hCoV-19/Japan/PG-82638/2021 | EPI_ISL_3895042 | 2021-09-02      |
| hCoV-19/Japan/PG-82639/2021 | EPI_ISL_3895043 | 2021-09-02      |
| hCoV-19/Japan/PG-82640/2021 | EPI_ISL_3895044 | 2021-09-02      |
| hCoV-19/Japan/PG-82641/2021 | EPI_ISL_3895045 | 2021-09-02      |
| hCoV-19/Japan/PG-82642/2021 | EPI_ISL_3895046 | 2021-09-02      |
| hCoV-19/Japan/PG-82643/2021 | EPI_ISL_3895047 | 2021-09-02      |
| hCoV-19/Japan/PG-82644/2021 | EPI_ISL_3895048 | 2021-09-02      |
| hCoV-19/Japan/PG-82645/2021 | EPI_ISL_3895049 | 2021-09-02      |
| hCoV-19/Japan/PG-82646/2021 | EPI_ISL_3895050 | 2021-09-02      |
| hCoV-19/Japan/PG-82647/2021 | EPI_ISL_3895051 | 2021-09-02      |
| hCoV-19/Japan/PG-82648/2021 | EPI_ISL_3895052 | 2021-09-02      |
| hCoV-19/Japan/PG-82649/2021 | EPI_ISL_3895053 | 2021-09-02      |
| hCoV-19/Japan/PG-82650/2021 | EPI_ISL_3895054 | 2021-09-02      |
| hCoV-19/Japan/PG-82651/2021 | EPI_ISL_3895055 | 2021-09-02      |
| hCoV-19/Japan/PG-82652/2021 | EPI_ISL_3895056 | 2021-09-02      |
| hCoV-19/Japan/PG-82653/2021 | EPI_ISL_3895057 | 2021-09-02      |
| hCoV-19/Japan/PG-82654/2021 | EPI_ISL_3895058 | 2021-09-02      |
| hCoV-19/Japan/PG-82655/2021 | EPI_ISL_3895059 | 2021-09-02      |
| hCoV-19/Japan/PG-82656/2021 | EPI_ISL_3895060 | 2021-09-02      |
| hCoV-19/Japan/PG-82657/2021 | EPI_ISL_3895061 | 2021-09-02      |
| hCoV-19/Japan/PG-82658/2021 | EPI_ISL_3895062 | 2021-09-02      |
| hCoV-19/Japan/PG-82659/2021 | EPI_ISL_3895063 | 2021-09-02      |
| hCoV-19/Japan/PG-82660/2021 | EPI_ISL_3895064 | 2021-09-02      |
| hCoV-19/Japan/PG-82661/2021 | EPI_ISL_3895065 | 2021-09-02      |
| hCoV-19/Japan/PG-82662/2021 | EPI_ISL_3895066 | 2021-09-02      |
| hCoV-19/Japan/PG-82663/2021 | EPI_ISL_3895067 | 2021-09-02      |
| hCoV-19/Japan/PG-82664/2021 | EPI_ISL_3895068 | 2021-09-02      |
| hCoV-19/Japan/PG-82665/2021 | EPI_ISL_3895069 | 2021-09-02      |
| hCoV-19/Japan/PG-82666/2021 | EPI_ISL_3895070 | 2021-09-02      |
| hCoV-19/Japan/PG-82667/2021 | EPI_ISL_3895071 | 2021-09-02      |
| hCoV-19/Japan/PG-82668/2021 | EPI_ISL_3895072 | 2021-09-02      |
| hCoV-19/Japan/PG-82669/2021 | EPI_ISL_3895073 | 2021-09-02      |
| hCoV-19/Japan/PG-82670/2021 | EPI_ISL_3895074 | 2021-09-02      |
| hCoV-19/Japan/PG-82671/2021 | EPI_ISL_3895075 | 2021-09-02      |
| hCoV-19/Japan/PG-82672/2021 | EPI_ISL_3895076 | 2021-09-02      |
| hCoV-19/Japan/PG-82673/2021 | EPI_ISL_3895077 | 2021-09-02      |
| hCoV-19/Japan/PG-82674/2021 | EPI_ISL_3895078 | 2021-09-02      |
| hCoV-19/Japan/PG-82675/2021 | EPI_ISL_3895079 | 2021-09-02      |
| hCoV-19/Japan/PG-82676/2021 | EPI_ISL_3895080 | 2021-09-02      |
| hCoV-19/Japan/PG-82677/2021 | EPI_ISL_3895081 | 2021-09-02      |
| hCoV-19/Japan/PG-82678/2021 | EPI_ISL_3895082 | 2021-09-02      |
| hCoV-19/Japan/PG-82679/2021 | EPI_ISL_3895083 | 2021-09-02      |
| hCoV-19/Japan/PG-82680/2021 | EPI_ISL_3895084 | 2021-09-02      |
| hCoV-19/Japan/PG-82681/2021 | EPI_ISL_3895085 | 2021-09-02      |
| hCoV-19/Japan/PG-82682/2021 | EPI_ISL_3895086 | 2021-09-02      |
| hCoV-19/Japan/PG-82683/2021 | EPI_ISL_3895087 | 2021-09-02      |
| hCoV-19/Japan/PG-82684/2021 | EPI_ISL_3895088 | 2021-09-02      |
| hCoV-19/Japan/PG-82685/2021 | EPI_ISL_3895089 | 2021-09-02      |
| hCoV-19/Japan/PG-82686/2021 | EPI_ISL_3895090 | 2021-09-02      |
| hCoV-19/Japan/PG-82687/2021 | EPI_ISL_3895091 | 2021-09-02      |
| hCoV-19/Japan/PG-82688/2021 | EPI_ISL_3895092 | 2021-09-02      |
| hCoV-19/Japan/PG-82689/2021 | EPI_ISL_3895093 | 2021-09-02      |
| hCoV-19/Japan/PG-82690/2021 | EPI_ISL_3895094 | 2021-09-02      |
| hCoV-19/Japan/PG-82691/2021 | EPI_ISL_3895095 | 2021-09-02      |

| virus_name                  | epiID           | submission_date |
|-----------------------------|-----------------|-----------------|
| hCoV-19/Japan/PG-82692/2021 | EPI_ISL_3895096 | 2021-09-02      |
| hCoV-19/Japan/PG-82693/2021 | EPI_ISL_3895097 | 2021-09-02      |
| hCoV-19/Japan/PG-82694/2021 | EPI_ISL_3895098 | 2021-09-02      |
| hCoV-19/Japan/PG-82695/2021 | EPI_ISL_3895099 | 2021-09-02      |
| hCoV-19/Japan/PG-82696/2021 | EPI_ISL_3895100 | 2021-09-02      |
| hCoV-19/Japan/PG-82697/2021 | EPI_ISL_3895101 | 2021-09-02      |
| hCoV-19/Japan/PG-82698/2021 | EPI_ISL_3895102 | 2021-09-02      |
| hCoV-19/Japan/PG-82699/2021 | EPI_ISL_3895103 | 2021-09-02      |
| hCoV-19/Japan/PG-82700/2021 | EPI_ISL_3895104 | 2021-09-02      |
| hCoV-19/Japan/PG-82701/2021 | EPI_ISL_3895105 | 2021-09-02      |
| hCoV-19/Japan/PG-82702/2021 | EPI_ISL_3895106 | 2021-09-02      |
| hCoV-19/Japan/PG-82703/2021 | EPI_ISL_3895107 | 2021-09-02      |
| hCoV-19/Japan/PG-82704/2021 | EPI_ISL_3895108 | 2021-09-02      |
| hCoV-19/Japan/PG-82705/2021 | EPI_ISL_3895109 | 2021-09-02      |
| hCoV-19/Japan/PG-82706/2021 | EPI_ISL_3895110 | 2021-09-02      |
| hCoV-19/Japan/PG-82707/2021 | EPI_ISL_3895111 | 2021-09-02      |
| hCoV-19/Japan/PG-82708/2021 | EPI_ISL_3895112 | 2021-09-02      |
| hCoV-19/Japan/PG-82709/2021 | EPI_ISL_3895113 | 2021-09-02      |
| hCoV-19/Japan/PG-82710/2021 | EPI_ISL_3895114 | 2021-09-02      |
| hCoV-19/Japan/PG-82711/2021 | EPI_ISL_3895115 | 2021-09-02      |
| hCoV-19/Japan/PG-82712/2021 | EPI_ISL_3895116 | 2021-09-02      |
| hCoV-19/Japan/PG-82713/2021 | EPI_ISL_3895117 | 2021-09-02      |
| hCoV-19/Japan/PG-82714/2021 | EPI_ISL_3895118 | 2021-09-02      |
| hCoV-19/Japan/PG-82715/2021 | EPI_ISL_3895119 | 2021-09-02      |
| hCoV-19/Japan/PG-82716/2021 | EPI_ISL_3895120 | 2021-09-02      |
| hCoV-19/Japan/PG-82717/2021 | EPI_ISL_3895121 | 2021-09-02      |
| hCoV-19/Japan/PG-82718/2021 | EPI_ISL_3895122 | 2021-09-02      |
| hCoV-19/Japan/PG-82719/2021 | EPI_ISL_3895123 | 2021-09-02      |
| hCoV-19/Japan/PG-82720/2021 | EPI_ISL_3895124 | 2021-09-02      |
| hCoV-19/Japan/PG-82721/2021 | EPI_ISL_3895125 | 2021-09-02      |
| hCoV-19/Japan/PG-82722/2021 | EPI_ISL_3895126 | 2021-09-02      |
| hCoV-19/Japan/PG-82723/2021 | EPI_ISL_3895127 | 2021-09-02      |
| hCoV-19/Japan/PG-82724/2021 | EPI_ISL_3895128 | 2021-09-02      |
| hCoV-19/Japan/PG-82725/2021 | EPI_ISL_3895129 | 2021-09-02      |
| hCoV-19/Japan/PG-82726/2021 | EPI_ISL_3895130 | 2021-09-02      |
| hCoV-19/Japan/PG-82727/2021 | EPI_ISL_3895131 | 2021-09-02      |
| hCoV-19/Japan/PG-82728/2021 | EPI_ISL_3895132 | 2021-09-02      |
| hCoV-19/Japan/PG-82729/2021 | EPI_ISL_3895133 | 2021-09-02      |
| hCoV-19/Japan/PG-82730/2021 | EPI_ISL_3895134 | 2021-09-02      |
| hCoV-19/Japan/PG-82731/2021 | EPI_ISL_3895135 | 2021-09-02      |
| hCoV-19/Japan/PG-82732/2021 | EPI_ISL_3895136 | 2021-09-02      |
| hCoV-19/Japan/PG-82733/2021 | EPI_ISL_3895137 | 2021-09-02      |
| hCoV-19/Japan/PG-82734/2021 | EPI_ISL_3895138 | 2021-09-02      |
| hCoV-19/Japan/PG-82735/2021 | EPI_ISL_3895139 | 2021-09-02      |
| hCoV-19/Japan/PG-82736/2021 | EPI_ISL_3895140 | 2021-09-02      |
| hCoV-19/Japan/PG-82737/2021 | EPI_ISL_3895141 | 2021-09-02      |
| hCoV-19/Japan/PG-82738/2021 | EPI_ISL_3895142 | 2021-09-02      |
| hCoV-19/Japan/PG-82739/2021 | EPI_ISL_3895143 | 2021-09-02      |
| hCoV-19/Japan/PG-82740/2021 | EPI_ISL_3895145 | 2021-09-02      |
| hCoV-19/Japan/PG-82741/2021 | EPI_ISL_3895147 | 2021-09-02      |
| hCoV-19/Japan/PG-82742/2021 | EPI_ISL_3895152 | 2021-09-02      |
| hCoV-19/Japan/PG-82743/2021 | EPI_ISL_3895157 | 2021-09-02      |
| hCoV-19/Japan/PG-82744/2021 | EPI_ISL_3895161 | 2021-09-02      |
| hCoV-19/Japan/PG-82745/2021 | EPI_ISL_3895167 | 2021-09-02      |

| virus_name                  | epiID           | submission_date |
|-----------------------------|-----------------|-----------------|
| hCoV-19/Japan/PG-82746/2021 | EPI_ISL_3895172 | 2021-09-02      |
| hCoV-19/Japan/PG-82747/2021 | EPI_ISL_3895177 | 2021-09-02      |
| hCoV-19/Japan/PG-82748/2021 | EPI_ISL_3895181 | 2021-09-02      |
| hCoV-19/Japan/PG-82749/2021 | EPI_ISL_3895186 | 2021-09-02      |
| hCoV-19/Japan/PG-82750/2021 | EPI_ISL_3895191 | 2021-09-02      |
| hCoV-19/Japan/PG-82751/2021 | EPI_ISL_3895196 | 2021-09-02      |
| hCoV-19/Japan/PG-82752/2021 | EPI_ISL_3895202 | 2021-09-02      |
| hCoV-19/Japan/PG-82753/2021 | EPI_ISL_3895206 | 2021-09-02      |
| hCoV-19/Japan/PG-82754/2021 | EPI_ISL_3895211 | 2021-09-02      |
| hCoV-19/Japan/PG-82755/2021 | EPI_ISL_3895216 | 2021-09-02      |
| hCoV-19/Japan/PG-82756/2021 | EPI_ISL_3895221 | 2021-09-02      |
| hCoV-19/Japan/PG-82757/2021 | EPI_ISL_3895226 | 2021-09-02      |
| hCoV-19/Japan/PG-82758/2021 | EPI_ISL_3895230 | 2021-09-02      |
| hCoV-19/Japan/PG-82759/2021 | EPI_ISL_3895235 | 2021-09-02      |
| hCoV-19/Japan/PG-82760/2021 | EPI_ISL_3895240 | 2021-09-02      |
| hCoV-19/Japan/PG-82761/2021 | EPI_ISL_3895244 | 2021-09-02      |
| hCoV-19/Japan/PG-82762/2021 | EPI_ISL_3895249 | 2021-09-02      |
| hCoV-19/Japan/PG-82763/2021 | EPI_ISL_3895254 | 2021-09-02      |
| hCoV-19/Japan/PG-82764/2021 | EPI_ISL_3895257 | 2021-09-02      |
| hCoV-19/Japan/PG-82765/2021 | EPI_ISL_3895259 | 2021-09-02      |
| hCoV-19/Japan/PG-82766/2021 | EPI_ISL_3895264 | 2021-09-02      |
| hCoV-19/Japan/PG-82767/2021 | EPI_ISL_3895269 | 2021-09-02      |
| hCoV-19/Japan/PG-82768/2021 | EPI_ISL_3895273 | 2021-09-02      |
| hCoV-19/Japan/PG-82769/2021 | EPI_ISL_3895279 | 2021-09-02      |
| hCoV-19/Japan/PG-82770/2021 | EPI_ISL_3895284 | 2021-09-02      |
| hCoV-19/Japan/PG-82771/2021 | EPI_ISL_3895289 | 2021-09-02      |
| hCoV-19/Japan/PG-82772/2021 | EPI_ISL_3895294 | 2021-09-02      |
| hCoV-19/Japan/PG-82773/2021 | EPI_ISL_3895298 | 2021-09-02      |
| hCoV-19/Japan/PG-82774/2021 | EPI_ISL_3895302 | 2021-09-02      |
| hCoV-19/Japan/PG-82775/2021 | EPI_ISL_3895307 | 2021-09-02      |
| hCoV-19/Japan/PG-82776/2021 | EPI_ISL_3895312 | 2021-09-02      |
| hCoV-19/Japan/PG-82777/2021 | EPI_ISL_3895317 | 2021-09-02      |
| hCoV-19/Japan/PG-82778/2021 | EPI_ISL_3895321 | 2021-09-02      |
| hCoV-19/Japan/PG-82779/2021 | EPI_ISL_3895326 | 2021-09-02      |
| hCoV-19/Japan/PG-82780/2021 | EPI_ISL_3895332 | 2021-09-02      |
| hCoV-19/Japan/PG-82781/2021 | EPI_ISL_3895337 | 2021-09-02      |
| hCoV-19/Japan/PG-82782/2021 | EPI_ISL_3895342 | 2021-09-02      |
| hCoV-19/Japan/PG-82783/2021 | EPI_ISL_3895347 | 2021-09-02      |
| hCoV-19/Japan/PG-82784/2021 | EPI_ISL_3895352 | 2021-09-02      |
| hCoV-19/Japan/PG-82785/2021 | EPI_ISL_3895357 | 2021-09-02      |
| hCoV-19/Japan/PG-82786/2021 | EPI_ISL_3895363 | 2021-09-02      |
| hCoV-19/Japan/PG-82787/2021 | EPI_ISL_3895368 | 2021-09-02      |
| hCoV-19/Japan/PG-82788/2021 | EPI_ISL_3895374 | 2021-09-02      |
| hCoV-19/Japan/PG-82789/2021 | EPI_ISL_3895378 | 2021-09-02      |
| hCoV-19/Japan/PG-82790/2021 | EPI_ISL_3895384 | 2021-09-02      |
| hCoV-19/Japan/PG-82791/2021 | EPI_ISL_3895389 | 2021-09-02      |
| hCoV-19/Japan/PG-82792/2021 | EPI_ISL_3895394 | 2021-09-02      |
| hCoV-19/Japan/PG-82793/2021 | EPI_ISL_3895399 | 2021-09-02      |
| hCoV-19/Japan/PG-82794/2021 | EPI_ISL_3895404 | 2021-09-02      |
| hCoV-19/Japan/PG-82795/2021 | EPI_ISL_3895409 | 2021-09-02      |
| hCoV-19/Japan/PG-82796/2021 | EPI_ISL_3895414 | 2021-09-02      |
| hCoV-19/Japan/PG-82797/2021 | EPI_ISL_3895419 | 2021-09-02      |
| hCoV-19/Japan/PG-82798/2021 | EPI_ISL_3895424 | 2021-09-02      |
| hCoV-19/Japan/PG-82799/2021 | EPI_ISL_3895429 | 2021-09-02      |

| virus_name                  | epiID           | submission_date |
|-----------------------------|-----------------|-----------------|
| hCoV-19/Japan/PG-82800/2021 | EPI_ISL_3895434 | 2021-09-02      |
| hCoV-19/Japan/PG-82801/2021 | EPI_ISL_3895439 | 2021-09-02      |
| hCoV-19/Japan/PG-82802/2021 | EPI_ISL_3895443 | 2021-09-02      |
| hCoV-19/Japan/PG-82803/2021 | EPI_ISL_3895448 | 2021-09-02      |
| hCoV-19/Japan/PG-82804/2021 | EPI_ISL_3895453 | 2021-09-02      |
| hCoV-19/Japan/PG-82805/2021 | EPI_ISL_3895456 | 2021-09-02      |
| hCoV-19/Japan/PG-82806/2021 | EPI_ISL_3895457 | 2021-09-02      |
| hCoV-19/Japan/PG-82807/2021 | EPI_ISL_3895458 | 2021-09-02      |
| hCoV-19/Japan/PG-82808/2021 | EPI_ISL_3895459 | 2021-09-02      |
| hCoV-19/Japan/PG-82809/2021 | EPI_ISL_3895460 | 2021-09-02      |
| hCoV-19/Japan/PG-82810/2021 | EPI_ISL_3895461 | 2021-09-02      |
| hCoV-19/Japan/PG-82811/2021 | EPI_ISL_3895462 | 2021-09-02      |
| hCoV-19/Japan/PG-82812/2021 | EPI_ISL_3895463 | 2021-09-02      |
| hCoV-19/Japan/PG-82813/2021 | EPI_ISL_3895464 | 2021-09-02      |
| hCoV-19/Japan/PG-82814/2021 | EPI_ISL_3895465 | 2021-09-02      |
| hCoV-19/Japan/PG-82815/2021 | EPI_ISL_3895466 | 2021-09-02      |
| hCoV-19/Japan/PG-82816/2021 | EPI_ISL_3895467 | 2021-09-02      |
| hCoV-19/Japan/PG-82817/2021 | EPI_ISL_3895468 | 2021-09-02      |
| hCoV-19/Japan/PG-82818/2021 | EPI_ISL_3895469 | 2021-09-02      |
| hCoV-19/Japan/PG-82819/2021 | EPI_ISL_3895470 | 2021-09-02      |
| hCoV-19/Japan/PG-82820/2021 | EPI_ISL_3895471 | 2021-09-02      |
| hCoV-19/Japan/PG-82821/2021 | EPI_ISL_3895472 | 2021-09-02      |
| hCoV-19/Japan/PG-82822/2021 | EPI_ISL_3895473 | 2021-09-02      |
| hCoV-19/Japan/PG-82823/2021 | EPI_ISL_3895474 | 2021-09-02      |
| hCoV-19/Japan/PG-82824/2021 | EPI_ISL_3895475 | 2021-09-02      |
| hCoV-19/Japan/PG-82825/2021 | EPI_ISL_3895476 | 2021-09-02      |
| hCoV-19/Japan/PG-82826/2021 | EPI_ISL_3895477 | 2021-09-02      |
| hCoV-19/Japan/PG-82827/2021 | EPI_ISL_3895478 | 2021-09-02      |
| hCoV-19/Japan/PG-82828/2021 | EPI_ISL_3895479 | 2021-09-02      |
| hCoV-19/Japan/PG-82829/2021 | EPI_ISL_3895480 | 2021-09-02      |
| hCoV-19/Japan/PG-82830/2021 | EPI_ISL_3895481 | 2021-09-02      |
| hCoV-19/Japan/PG-82831/2021 | EPI_ISL_3895482 | 2021-09-02      |
| hCoV-19/Japan/PG-82832/2021 | EPI_ISL_3895483 | 2021-09-02      |
| hCoV-19/Japan/PG-82833/2021 | EPI_ISL_3895484 | 2021-09-02      |
| hCoV-19/Japan/PG-82834/2021 | EPI_ISL_3895485 | 2021-09-02      |
| hCoV-19/Japan/PG-82835/2021 | EPI_ISL_3895486 | 2021-09-02      |
| hCoV-19/Japan/PG-82836/2021 | EPI_ISL_3895487 | 2021-09-02      |
| hCoV-19/Japan/PG-82837/2021 | EPI_ISL_3895488 | 2021-09-02      |
| hCoV-19/Japan/PG-82838/2021 | EPI_ISL_3895489 | 2021-09-02      |
| hCoV-19/Japan/PG-82839/2021 | EPI_ISL_3895490 | 2021-09-02      |
| hCoV-19/Japan/PG-82840/2021 | EPI_ISL_3895491 | 2021-09-02      |
| hCoV-19/Japan/PG-82841/2021 | EPI_ISL_3895492 | 2021-09-02      |
| hCoV-19/Japan/PG-82842/2021 | EPI_ISL_3895493 | 2021-09-02      |
| hCoV-19/Japan/PG-82843/2021 | EPI_ISL_3895494 | 2021-09-02      |
| hCoV-19/Japan/PG-82844/2021 | EPI_ISL_3895495 | 2021-09-02      |
| hCoV-19/Japan/PG-82845/2021 | EPI_ISL_3895496 | 2021-09-02      |
| hCoV-19/Japan/PG-82846/2021 | EPI_ISL_3895497 | 2021-09-02      |
| hCoV-19/Japan/PG-82847/2021 | EPI_ISL_3895498 | 2021-09-02      |
| hCoV-19/Japan/PG-82848/2021 | EPI_ISL_3895499 | 2021-09-02      |
| hCoV-19/Japan/PG-82849/2021 | EPI_ISL_3895500 | 2021-09-02      |
| hCoV-19/Japan/PG-82850/2021 | EPI_ISL_3895501 | 2021-09-02      |
| hCoV-19/Japan/PG-82851/2021 | EPI_ISL_3895502 | 2021-09-02      |
| hCoV-19/Japan/PG-82852/2021 | EPI_ISL_3895503 | 2021-09-02      |
| hCoV-19/Japan/PG-82853/2021 | EPI_ISL_3895504 | 2021-09-02      |

| virus_name                  | epiID           | submission_date |
|-----------------------------|-----------------|-----------------|
| hCoV-19/Japan/PG-82854/2021 | EPI_ISL_3895505 | 2021-09-02      |
| hCoV-19/Japan/PG-82855/2021 | EPI_ISL_3895506 | 2021-09-02      |
| hCoV-19/Japan/PG-82856/2021 | EPI_ISL_3895507 | 2021-09-02      |
| hCoV-19/Japan/PG-82857/2021 | EPI_ISL_3895508 | 2021-09-02      |
| hCoV-19/Japan/PG-82858/2021 | EPI_ISL_3895509 | 2021-09-02      |
| hCoV-19/Japan/PG-82859/2021 | EPI_ISL_3895510 | 2021-09-02      |
| hCoV-19/Japan/PG-82860/2021 | EPI_ISL_3895511 | 2021-09-02      |
| hCoV-19/Japan/PG-82861/2021 | EPI_ISL_3895512 | 2021-09-02      |
| hCoV-19/Japan/PG-82862/2021 | EPI_ISL_3895513 | 2021-09-02      |
| hCoV-19/Japan/PG-82863/2021 | EPI_ISL_3895514 | 2021-09-02      |
| hCoV-19/Japan/PG-82864/2021 | EPI_ISL_3895515 | 2021-09-02      |
| hCoV-19/Japan/PG-82865/2021 | EPI_ISL_3895516 | 2021-09-02      |
| hCoV-19/Japan/PG-82866/2021 | EPI_ISL_3895517 | 2021-09-02      |
| hCoV-19/Japan/PG-82867/2021 | EPI_ISL_3895518 | 2021-09-02      |
| hCoV-19/Japan/PG-82868/2021 | EPI_ISL_3895519 | 2021-09-02      |
| hCoV-19/Japan/PG-82869/2021 | EPI_ISL_3895520 | 2021-09-02      |
| hCoV-19/Japan/PG-82870/2021 | EPI_ISL_3895521 | 2021-09-02      |
| hCoV-19/Japan/PG-82871/2021 | EPI_ISL_3895522 | 2021-09-02      |
| hCoV-19/Japan/PG-82872/2021 | EPI_ISL_3895523 | 2021-09-02      |
| hCoV-19/Japan/PG-82873/2021 | EPI_ISL_3895524 | 2021-09-02      |
| hCoV-19/Japan/PG-82874/2021 | EPI_ISL_3895525 | 2021-09-02      |
| hCoV-19/Japan/PG-82875/2021 | EPI_ISL_3895526 | 2021-09-02      |
| hCoV-19/Japan/PG-82876/2021 | EPI_ISL_3895527 | 2021-09-02      |
| hCoV-19/Japan/PG-82877/2021 | EPI_ISL_3895528 | 2021-09-02      |
| hCoV-19/Japan/PG-82878/2021 | EPI_ISL_3895529 | 2021-09-02      |
| hCoV-19/Japan/PG-82879/2021 | EPI_ISL_3895530 | 2021-09-02      |
| hCoV-19/Japan/PG-82880/2021 | EPI_ISL_3895531 | 2021-09-02      |
| hCoV-19/Japan/PG-82881/2021 | EPI_ISL_3895532 | 2021-09-02      |
| hCoV-19/Japan/PG-82882/2021 | EPI_ISL_3895533 | 2021-09-02      |
| hCoV-19/Japan/PG-82883/2021 | EPI_ISL_3895534 | 2021-09-02      |
| hCoV-19/Japan/PG-82884/2021 | EPI_ISL_3895535 | 2021-09-02      |
| hCoV-19/Japan/PG-82885/2021 | EPI_ISL_3895536 | 2021-09-02      |
| hCoV-19/Japan/PG-82886/2021 | EPI_ISL_3895537 | 2021-09-02      |
| hCoV-19/Japan/PG-82887/2021 | EPI_ISL_3895538 | 2021-09-02      |
| hCoV-19/Japan/PG-82888/2021 | EPI_ISL_3895539 | 2021-09-02      |
| hCoV-19/Japan/PG-82889/2021 | EPI_ISL_3895540 | 2021-09-02      |
| hCoV-19/Japan/PG-82890/2021 | EPI_ISL_3895541 | 2021-09-02      |
| hCoV-19/Japan/PG-82891/2021 | EPI_ISL_3895542 | 2021-09-02      |
| hCoV-19/Japan/PG-82892/2021 | EPI_ISL_3895543 | 2021-09-02      |
| hCoV-19/Japan/PG-82893/2021 | EPI_ISL_3895544 | 2021-09-02      |
| hCoV-19/Japan/PG-82894/2021 | EPI_ISL_3895545 | 2021-09-02      |
| hCoV-19/Japan/PG-82895/2021 | EPI_ISL_3895546 | 2021-09-02      |
| hCoV-19/Japan/PG-82896/2021 | EPI_ISL_3895547 | 2021-09-02      |
| hCoV-19/Japan/PG-82897/2021 | EPI_ISL_3895548 | 2021-09-02      |
| hCoV-19/Japan/PG-82898/2021 | EPI_ISL_3895549 | 2021-09-02      |
| hCoV-19/Japan/PG-82899/2021 | EPI_ISL_3895550 | 2021-09-02      |
| hCoV-19/Japan/PG-82900/2021 | EPI_ISL_3895551 | 2021-09-02      |
| hCoV-19/Japan/PG-82901/2021 | EPI_ISL_3895552 | 2021-09-02      |
| hCoV-19/Japan/PG-82902/2021 | EPI_ISL_3895553 | 2021-09-02      |
| hCoV-19/Japan/PG-82903/2021 | EPI_ISL_3895554 | 2021-09-02      |
| hCoV-19/Japan/PG-82904/2021 | EPI_ISL_3895555 | 2021-09-02      |
| hCoV-19/Japan/PG-82905/2021 | EPI_ISL_3895556 | 2021-09-02      |
| hCoV-19/Japan/PG-82906/2021 | EPI_ISL_3895557 | 2021-09-02      |
| hCoV-19/Japan/PG-82907/2021 | EPI_ISL_3895558 | 2021-09-02      |



| virus_name                  | epiID           | submission_date |
|-----------------------------|-----------------|-----------------|
| hCoV-19/Japan/PG-82908/2021 | EPI_ISL_3895559 | 2021-09-02      |
| hCoV-19/Japan/PG-82909/2021 | EPI_ISL_3895560 | 2021-09-02      |
| hCoV-19/Japan/PG-82910/2021 | EPI_ISL_3895561 | 2021-09-02      |
| hCoV-19/Japan/PG-82911/2021 | EPI_ISL_3895562 | 2021-09-02      |
| hCoV-19/Japan/PG-82912/2021 | EPI_ISL_3895563 | 2021-09-02      |
| hCoV-19/Japan/PG-82913/2021 | EPI_ISL_3895564 | 2021-09-02      |
| hCoV-19/Japan/PG-82914/2021 | EPI_ISL_3895565 | 2021-09-02      |
| hCoV-19/Japan/PG-82915/2021 | EPI_ISL_3895566 | 2021-09-02      |
| hCoV-19/Japan/PG-82916/2021 | EPI_ISL_3895567 | 2021-09-02      |
| hCoV-19/Japan/PG-82917/2021 | EPI_ISL_3895568 | 2021-09-02      |
| hCoV-19/Japan/PG-82918/2021 | EPI_ISL_3895569 | 2021-09-02      |
| hCoV-19/Japan/PG-82919/2021 | EPI_ISL_3895570 | 2021-09-02      |
| hCoV-19/Japan/PG-82920/2021 | EPI_ISL_3895571 | 2021-09-02      |
| hCoV-19/Japan/PG-82921/2021 | EPI_ISL_3895572 | 2021-09-02      |
| hCoV-19/Japan/PG-82922/2021 | EPI_ISL_3895573 | 2021-09-02      |
| hCoV-19/Japan/PG-82923/2021 | EPI_ISL_3895574 | 2021-09-02      |
| hCoV-19/Japan/PG-82924/2021 | EPI_ISL_3895575 | 2021-09-02      |
| hCoV-19/Japan/PG-82925/2021 | EPI_ISL_3895576 | 2021-09-02      |
| hCoV-19/Japan/PG-82926/2021 | EPI_ISL_3895577 | 2021-09-02      |
| hCoV-19/Japan/PG-82927/2021 | EPI_ISL_3895578 | 2021-09-02      |
| hCoV-19/Japan/PG-82928/2021 | EPI_ISL_3895579 | 2021-09-02      |
| hCoV-19/Japan/PG-82929/2021 | EPI_ISL_3895580 | 2021-09-02      |
| hCoV-19/Japan/PG-82930/2021 | EPI_ISL_3895581 | 2021-09-02      |
| hCoV-19/Japan/PG-82931/2021 | EPI_ISL_3895582 | 2021-09-02      |
| hCoV-19/Japan/PG-82932/2021 | EPI_ISL_3895583 | 2021-09-02      |
| hCoV-19/Japan/PG-82933/2021 | EPI_ISL_3895584 | 2021-09-02      |
| hCoV-19/Japan/PG-82934/2021 | EPI_ISL_3895585 | 2021-09-02      |
| hCoV-19/Japan/PG-82935/2021 | EPI_ISL_3895586 | 2021-09-02      |
| hCoV-19/Japan/PG-82936/2021 | EPI_ISL_3895587 | 2021-09-02      |
| hCoV-19/Japan/PG-82937/2021 | EPI_ISL_3895588 | 2021-09-02      |
| hCoV-19/Japan/PG-82938/2021 | EPI_ISL_3895589 | 2021-09-02      |
| hCoV-19/Japan/PG-82939/2021 | EPI_ISL_3895590 | 2021-09-02      |
| hCoV-19/Japan/PG-82940/2021 | EPI_ISL_3895591 | 2021-09-02      |
| hCoV-19/Japan/PG-82941/2021 | EPI_ISL_3895592 | 2021-09-02      |
| hCoV-19/Japan/PG-82942/2021 | EPI_ISL_3895593 | 2021-09-02      |
| hCoV-19/Japan/PG-82943/2021 | EPI_ISL_3895594 | 2021-09-02      |
| hCoV-19/Japan/PG-82944/2021 | EPI_ISL_3895595 | 2021-09-02      |
| hCoV-19/Japan/PG-82945/2021 | EPI_ISL_3895596 | 2021-09-02      |
| hCoV-19/Japan/PG-82946/2021 | EPI_ISL_3895597 | 2021-09-02      |
| hCoV-19/Japan/PG-82947/2021 | EPI_ISL_3895598 | 2021-09-02      |
| hCoV-19/Japan/PG-82948/2021 | EPI_ISL_3895599 | 2021-09-02      |
| hCoV-19/Japan/PG-82949/2021 | EPI_ISL_3895600 | 2021-09-02      |
| hCoV-19/Japan/PG-82950/2021 | EPI_ISL_3895601 | 2021-09-02      |
| hCoV-19/Japan/PG-82951/2021 | EPI_ISL_3895602 | 2021-09-02      |
| hCoV-19/Japan/PG-82952/2021 | EPI_ISL_3895603 | 2021-09-02      |
| hCoV-19/Japan/PG-82953/2021 | EPI_ISL_3895604 | 2021-09-02      |
| hCoV-19/Japan/PG-82954/2021 | EPI_ISL_3895605 | 2021-09-02      |
| hCoV-19/Japan/PG-82955/2021 | EPI_ISL_3895606 | 2021-09-02      |
| hCoV-19/Japan/PG-82956/2021 | EPI_ISL_3895607 | 2021-09-02      |
| hCoV-19/Japan/PG-82957/2021 | EPI_ISL_3895608 | 2021-09-02      |
| hCoV-19/Japan/PG-82958/2021 | EPI_ISL_3895609 | 2021-09-02      |
| hCoV-19/Japan/PG-82959/2021 | EPI_ISL_3895610 | 2021-09-02      |
| hCoV-19/Japan/PG-82960/2021 | EPI_ISL_3895611 | 2021-09-02      |
| hCoV-19/Japan/PG-82961/2021 | EPI_ISL_3895612 | 2021-09-02      |

| virus_name                  | epiID           | submission_date |
|-----------------------------|-----------------|-----------------|
| hCoV-19/Japan/PG-82962/2021 | EPI_ISL_3895613 | 2021-09-02      |
| hCoV-19/Japan/PG-82963/2021 | EPI_ISL_3895614 | 2021-09-02      |
| hCoV-19/Japan/PG-82964/2021 | EPI_ISL_3895615 | 2021-09-02      |
| hCoV-19/Japan/PG-82965/2021 | EPI_ISL_3895616 | 2021-09-02      |
| hCoV-19/Japan/PG-82966/2021 | EPI_ISL_3895617 | 2021-09-02      |
| hCoV-19/Japan/PG-82967/2021 | EPI_ISL_3895618 | 2021-09-02      |
| hCoV-19/Japan/PG-82968/2021 | EPI_ISL_3895619 | 2021-09-02      |
| hCoV-19/Japan/PG-82969/2021 | EPI_ISL_3895620 | 2021-09-02      |
| hCoV-19/Japan/PG-82970/2021 | EPI_ISL_3895621 | 2021-09-02      |
| hCoV-19/Japan/PG-82971/2021 | EPI_ISL_3895622 | 2021-09-02      |
| hCoV-19/Japan/PG-82972/2021 | EPI_ISL_3895623 | 2021-09-02      |
| hCoV-19/Japan/PG-82973/2021 | EPI_ISL_3895624 | 2021-09-02      |
| hCoV-19/Japan/PG-82974/2021 | EPI_ISL_3895625 | 2021-09-02      |
| hCoV-19/Japan/PG-82975/2021 | EPI_ISL_3895626 | 2021-09-02      |
| hCoV-19/Japan/PG-82976/2021 | EPI_ISL_3895627 | 2021-09-02      |
| hCoV-19/Japan/PG-82977/2021 | EPI_ISL_3895628 | 2021-09-02      |
| hCoV-19/Japan/PG-82978/2021 | EPI_ISL_3895629 | 2021-09-02      |
| hCoV-19/Japan/PG-82979/2021 | EPI_ISL_3895630 | 2021-09-02      |
| hCoV-19/Japan/PG-82980/2021 | EPI_ISL_3895631 | 2021-09-02      |
| hCoV-19/Japan/PG-82981/2021 | EPI_ISL_3895632 | 2021-09-02      |
| hCoV-19/Japan/PG-82982/2021 | EPI_ISL_3895633 | 2021-09-02      |
| hCoV-19/Japan/PG-82983/2021 | EPI_ISL_3895634 | 2021-09-02      |
| hCoV-19/Japan/PG-82984/2021 | EPI_ISL_3895635 | 2021-09-02      |
| hCoV-19/Japan/PG-82985/2021 | EPI_ISL_3895636 | 2021-09-02      |
| hCoV-19/Japan/PG-82986/2021 | EPI_ISL_3895637 | 2021-09-02      |
| hCoV-19/Japan/PG-82987/2021 | EPI_ISL_3895638 | 2021-09-02      |
| hCoV-19/Japan/PG-82988/2021 | EPI_ISL_3895639 | 2021-09-02      |
| hCoV-19/Japan/PG-82989/2021 | EPI_ISL_3895640 | 2021-09-02      |
| hCoV-19/Japan/PG-82990/2021 | EPI_ISL_3895641 | 2021-09-02      |
| hCoV-19/Japan/PG-82991/2021 | EPI_ISL_3895642 | 2021-09-02      |
| hCoV-19/Japan/PG-82992/2021 | EPI_ISL_3895643 | 2021-09-02      |
| hCoV-19/Japan/PG-82993/2021 | EPI_ISL_3895644 | 2021-09-02      |
| hCoV-19/Japan/PG-82994/2021 | EPI_ISL_3895645 | 2021-09-02      |
| hCoV-19/Japan/PG-82995/2021 | EPI_ISL_3895646 | 2021-09-02      |
| hCoV-19/Japan/PG-82996/2021 | EPI_ISL_3895647 | 2021-09-02      |
| hCoV-19/Japan/PG-82997/2021 | EPI_ISL_3895648 | 2021-09-02      |
| hCoV-19/Japan/PG-82998/2021 | EPI_ISL_3895649 | 2021-09-02      |
| hCoV-19/Japan/PG-82999/2021 | EPI_ISL_3895650 | 2021-09-02      |
| hCoV-19/Japan/PG-83000/2021 | EPI_ISL_3895651 | 2021-09-02      |
| hCoV-19/Japan/PG-83001/2021 | EPI_ISL_3895652 | 2021-09-02      |
| hCoV-19/Japan/PG-83002/2021 | EPI_ISL_3895653 | 2021-09-02      |
| hCoV-19/Japan/PG-83003/2021 | EPI_ISL_3895654 | 2021-09-02      |
| hCoV-19/Japan/PG-83004/2021 | EPI_ISL_3895655 | 2021-09-02      |
| hCoV-19/Japan/PG-83005/2021 | EPI_ISL_3895656 | 2021-09-02      |
| hCoV-19/Japan/PG-83006/2021 | EPI_ISL_3895657 | 2021-09-02      |
| hCoV-19/Japan/PG-83007/2021 | EPI_ISL_3895658 | 2021-09-02      |
| hCoV-19/Japan/PG-83008/2021 | EPI_ISL_3895659 | 2021-09-02      |
| hCoV-19/Japan/PG-83009/2021 | EPI_ISL_3895660 | 2021-09-02      |
| hCoV-19/Japan/PG-83010/2021 | EPI_ISL_3895661 | 2021-09-02      |
| hCoV-19/Japan/PG-83011/2021 | EPI_ISL_3895662 | 2021-09-02      |
| hCoV-19/Japan/PG-83012/2021 | EPI_ISL_3895663 | 2021-09-02      |
| hCoV-19/Japan/PG-83013/2021 | EPI_ISL_3895664 | 2021-09-02      |
| hCoV-19/Japan/PG-83014/2021 | EPI_ISL_3895665 | 2021-09-02      |
| hCoV-19/Japan/PG-83015/2021 | EPI_ISL_3895666 | 2021-09-02      |

| virus_name                  | epiID           | submission_date |
|-----------------------------|-----------------|-----------------|
| hCoV-19/Japan/PG-83016/2021 | EPI_ISL_3895667 | 2021-09-02      |
| hCoV-19/Japan/PG-83017/2021 | EPI_ISL_3895668 | 2021-09-02      |
| hCoV-19/Japan/PG-83018/2021 | EPI_ISL_3895669 | 2021-09-02      |
| hCoV-19/Japan/PG-83019/2021 | EPI_ISL_3895670 | 2021-09-02      |
| hCoV-19/Japan/PG-83020/2021 | EPI_ISL_3895671 | 2021-09-02      |
| hCoV-19/Japan/PG-83021/2021 | EPI_ISL_3895672 | 2021-09-02      |
| hCoV-19/Japan/PG-83022/2021 | EPI_ISL_3895673 | 2021-09-02      |
| hCoV-19/Japan/PG-83023/2021 | EPI_ISL_3895674 | 2021-09-02      |
| hCoV-19/Japan/PG-83024/2021 | EPI_ISL_3895675 | 2021-09-02      |
| hCoV-19/Japan/PG-83025/2021 | EPI_ISL_3895676 | 2021-09-02      |
| hCoV-19/Japan/PG-83026/2021 | EPI_ISL_3895677 | 2021-09-02      |
| hCoV-19/Japan/PG-83027/2021 | EPI_ISL_3895678 | 2021-09-02      |
| hCoV-19/Japan/PG-83028/2021 | EPI_ISL_3895679 | 2021-09-02      |
| hCoV-19/Japan/PG-83029/2021 | EPI_ISL_3895680 | 2021-09-02      |
| hCoV-19/Japan/PG-83030/2021 | EPI_ISL_3895681 | 2021-09-02      |
| hCoV-19/Japan/PG-83031/2021 | EPI_ISL_3895682 | 2021-09-02      |
| hCoV-19/Japan/PG-83032/2021 | EPI_ISL_3895683 | 2021-09-02      |
| hCoV-19/Japan/PG-83033/2021 | EPI_ISL_3895684 | 2021-09-02      |
| hCoV-19/Japan/PG-83034/2021 | EPI_ISL_3895685 | 2021-09-02      |
| hCoV-19/Japan/PG-83035/2021 | EPI_ISL_3895686 | 2021-09-02      |
| hCoV-19/Japan/PG-83036/2021 | EPI_ISL_3895687 | 2021-09-02      |
| hCoV-19/Japan/PG-83037/2021 | EPI_ISL_3895688 | 2021-09-02      |
| hCoV-19/Japan/PG-83038/2021 | EPI_ISL_3895689 | 2021-09-02      |
| hCoV-19/Japan/PG-83039/2021 | EPI_ISL_3895690 | 2021-09-02      |
| hCoV-19/Japan/PG-83040/2021 | EPI_ISL_3895691 | 2021-09-02      |
| hCoV-19/Japan/PG-83041/2021 | EPI_ISL_3895692 | 2021-09-02      |
| hCoV-19/Japan/PG-83042/2021 | EPI_ISL_3895693 | 2021-09-02      |
| hCoV-19/Japan/PG-83043/2021 | EPI_ISL_3895694 | 2021-09-02      |
| hCoV-19/Japan/PG-83044/2021 | EPI_ISL_3895695 | 2021-09-02      |
| hCoV-19/Japan/PG-83045/2021 | EPI_ISL_3895696 | 2021-09-02      |
| hCoV-19/Japan/PG-83046/2021 | EPI_ISL_3895697 | 2021-09-02      |
| hCoV-19/Japan/PG-83047/2021 | EPI_ISL_3895698 | 2021-09-02      |
| hCoV-19/Japan/PG-83048/2021 | EPI_ISL_3895699 | 2021-09-02      |
| hCoV-19/Japan/PG-83049/2021 | EPI_ISL_3895700 | 2021-09-02      |
| hCoV-19/Japan/PG-83050/2021 | EPI_ISL_3895701 | 2021-09-02      |
| hCoV-19/Japan/PG-83051/2021 | EPI_ISL_3895702 | 2021-09-02      |
| hCoV-19/Japan/PG-83052/2021 | EPI_ISL_3895703 | 2021-09-02      |
| hCoV-19/Japan/PG-83053/2021 | EPI_ISL_3895704 | 2021-09-02      |
| hCoV-19/Japan/PG-83054/2021 | EPI_ISL_3895705 | 2021-09-02      |
| hCoV-19/Japan/PG-83055/2021 | EPI_ISL_3895706 | 2021-09-02      |
| hCoV-19/Japan/PG-83056/2021 | EPI_ISL_3895707 | 2021-09-02      |
| hCoV-19/Japan/PG-83057/2021 | EPI_ISL_3895708 | 2021-09-02      |
| hCoV-19/Japan/PG-83058/2021 | EPI_ISL_3895709 | 2021-09-02      |
| hCoV-19/Japan/PG-83059/2021 | EPI_ISL_3895710 | 2021-09-02      |
| hCoV-19/Japan/PG-83060/2021 | EPI_ISL_3895711 | 2021-09-02      |
| hCoV-19/Japan/PG-83061/2021 | EPI_ISL_3895712 | 2021-09-02      |
| hCoV-19/Japan/PG-83062/2021 | EPI_ISL_3895713 | 2021-09-02      |
| hCoV-19/Japan/PG-83063/2021 | EPI_ISL_3895714 | 2021-09-02      |
| hCoV-19/Japan/PG-83064/2021 | EPI_ISL_3895715 | 2021-09-02      |
| hCoV-19/Japan/PG-83065/2021 | EPI_ISL_3895716 | 2021-09-02      |
| hCoV-19/Japan/PG-83066/2021 | EPI_ISL_3895717 | 2021-09-02      |
| hCoV-19/Japan/PG-83067/2021 | EPI_ISL_3895718 | 2021-09-02      |
| hCoV-19/Japan/PG-83068/2021 | EPI_ISL_3895719 | 2021-09-02      |
| hCoV-19/Japan/PG-83069/2021 | EPI_ISL_3895720 | 2021-09-02      |

| virus_name                  | epiID           | submission_date |
|-----------------------------|-----------------|-----------------|
| hCoV-19/Japan/PG-83070/2021 | EPI_ISL_3895721 | 2021-09-02      |
| hCoV-19/Japan/PG-83071/2021 | EPI_ISL_3895722 | 2021-09-02      |
| hCoV-19/Japan/PG-83072/2021 | EPI_ISL_3895723 | 2021-09-02      |
| hCoV-19/Japan/PG-83073/2021 | EPI_ISL_3895724 | 2021-09-02      |
| hCoV-19/Japan/PG-83074/2021 | EPI_ISL_3895725 | 2021-09-02      |
| hCoV-19/Japan/PG-83075/2021 | EPI_ISL_3895726 | 2021-09-02      |
| hCoV-19/Japan/PG-83076/2021 | EPI_ISL_3895727 | 2021-09-02      |
| hCoV-19/Japan/PG-83077/2021 | EPI_ISL_3895728 | 2021-09-02      |
| hCoV-19/Japan/PG-83078/2021 | EPI_ISL_3895729 | 2021-09-02      |
| hCoV-19/Japan/PG-83079/2021 | EPI_ISL_3895730 | 2021-09-02      |
| hCoV-19/Japan/PG-83080/2021 | EPI_ISL_3895731 | 2021-09-02      |
| hCoV-19/Japan/PG-83081/2021 | EPI_ISL_3895732 | 2021-09-02      |
| hCoV-19/Japan/PG-83082/2021 | EPI_ISL_3895733 | 2021-09-02      |
| hCoV-19/Japan/PG-83083/2021 | EPI_ISL_3895734 | 2021-09-02      |
| hCoV-19/Japan/PG-83084/2021 | EPI_ISL_3895735 | 2021-09-02      |
| hCoV-19/Japan/PG-83085/2021 | EPI_ISL_3895736 | 2021-09-02      |
| hCoV-19/Japan/PG-83086/2021 | EPI_ISL_3895737 | 2021-09-02      |
| hCoV-19/Japan/PG-83087/2021 | EPI_ISL_3895738 | 2021-09-02      |
| hCoV-19/Japan/PG-83088/2021 | EPI_ISL_3895739 | 2021-09-02      |
| hCoV-19/Japan/PG-83089/2021 | EPI_ISL_3895740 | 2021-09-02      |
| hCoV-19/Japan/PG-83090/2021 | EPI_ISL_3895741 | 2021-09-02      |
| hCoV-19/Japan/PG-83091/2021 | EPI_ISL_3895742 | 2021-09-02      |
| hCoV-19/Japan/PG-83092/2021 | EPI_ISL_3895743 | 2021-09-02      |
| hCoV-19/Japan/PG-83093/2021 | EPI_ISL_3895744 | 2021-09-02      |
| hCoV-19/Japan/PG-83094/2021 | EPI_ISL_3895745 | 2021-09-02      |
| hCoV-19/Japan/PG-83095/2021 | EPI_ISL_3895746 | 2021-09-02      |
| hCoV-19/Japan/PG-83096/2021 | EPI_ISL_3895747 | 2021-09-02      |
| hCoV-19/Japan/PG-83097/2021 | EPI_ISL_3895748 | 2021-09-02      |
| hCoV-19/Japan/PG-83098/2021 | EPI_ISL_3895749 | 2021-09-02      |
| hCoV-19/Japan/PG-83099/2021 | EPI_ISL_3895750 | 2021-09-02      |
| hCoV-19/Japan/PG-83100/2021 | EPI_ISL_3895751 | 2021-09-02      |
| hCoV-19/Japan/PG-83101/2021 | EPI_ISL_3895752 | 2021-09-02      |
| hCoV-19/Japan/PG-83102/2021 | EPI_ISL_3895753 | 2021-09-02      |
| hCoV-19/Japan/PG-83103/2021 | EPI_ISL_3895754 | 2021-09-02      |
| hCoV-19/Japan/PG-83104/2021 | EPI_ISL_3895755 | 2021-09-02      |
| hCoV-19/Japan/PG-83105/2021 | EPI_ISL_3895756 | 2021-09-02      |
| hCoV-19/Japan/PG-83106/2021 | EPI_ISL_3895757 | 2021-09-02      |
| hCoV-19/Japan/PG-83107/2021 | EPI_ISL_3895758 | 2021-09-02      |
| hCoV-19/Japan/PG-83108/2021 | EPI_ISL_3895759 | 2021-09-02      |
| hCoV-19/Japan/PG-83109/2021 | EPI_ISL_3895760 | 2021-09-02      |
| hCoV-19/Japan/PG-83110/2021 | EPI_ISL_3895761 | 2021-09-02      |
| hCoV-19/Japan/PG-83111/2021 | EPI_ISL_3895762 | 2021-09-02      |
| hCoV-19/Japan/PG-83112/2021 | EPI_ISL_3895763 | 2021-09-02      |
| hCoV-19/Japan/PG-83113/2021 | EPI_ISL_3895764 | 2021-09-02      |
| hCoV-19/Japan/PG-83114/2021 | EPI_ISL_3895765 | 2021-09-02      |
| hCoV-19/Japan/PG-83115/2021 | EPI_ISL_3895766 | 2021-09-02      |
| hCoV-19/Japan/PG-83116/2021 | EPI_ISL_3895767 | 2021-09-02      |
| hCoV-19/Japan/PG-83117/2021 | EPI_ISL_3895768 | 2021-09-02      |
| hCoV-19/Japan/PG-83118/2021 | EPI_ISL_3895769 | 2021-09-02      |
| hCoV-19/Japan/PG-83119/2021 | EPI_ISL_3895770 | 2021-09-02      |
| hCoV-19/Japan/PG-83120/2021 | EPI_ISL_3895771 | 2021-09-02      |
| hCoV-19/Japan/PG-83121/2021 | EPI_ISL_3895772 | 2021-09-02      |
| hCoV-19/Japan/PG-83122/2021 | EPI_ISL_3895773 | 2021-09-02      |
| hCoV-19/Japan/PG-83123/2021 | EPI_ISL_3895774 | 2021-09-02      |

| virus_name                  | epiID           | submission_date |
|-----------------------------|-----------------|-----------------|
| hCoV-19/Japan/PG-83124/2021 | EPI_ISL_3895775 | 2021-09-02      |
| hCoV-19/Japan/PG-83125/2021 | EPI_ISL_3895776 | 2021-09-02      |
| hCoV-19/Japan/PG-83126/2021 | EPI_ISL_3895777 | 2021-09-02      |
| hCoV-19/Japan/PG-83127/2021 | EPI_ISL_3895778 | 2021-09-02      |
| hCoV-19/Japan/PG-83128/2021 | EPI_ISL_3895779 | 2021-09-02      |
| hCoV-19/Japan/PG-83129/2021 | EPI_ISL_3895780 | 2021-09-02      |
| hCoV-19/Japan/PG-83130/2021 | EPI_ISL_3895781 | 2021-09-02      |
| hCoV-19/Japan/PG-83131/2021 | EPI_ISL_3895782 | 2021-09-02      |
| hCoV-19/Japan/PG-83132/2021 | EPI_ISL_3895783 | 2021-09-02      |
| hCoV-19/Japan/PG-83133/2021 | EPI_ISL_3895784 | 2021-09-02      |
| hCoV-19/Japan/PG-83134/2021 | EPI_ISL_3895785 | 2021-09-02      |
| hCoV-19/Japan/PG-83135/2021 | EPI_ISL_3895786 | 2021-09-02      |
| hCoV-19/Japan/PG-83136/2021 | EPI_ISL_3895787 | 2021-09-02      |
| hCoV-19/Japan/PG-83137/2021 | EPI_ISL_3895788 | 2021-09-02      |
| hCoV-19/Japan/PG-83138/2021 | EPI_ISL_3895789 | 2021-09-02      |
| hCoV-19/Japan/PG-83139/2021 | EPI_ISL_3895790 | 2021-09-02      |
| hCoV-19/Japan/PG-83140/2021 | EPI_ISL_3895791 | 2021-09-02      |
| hCoV-19/Japan/PG-83141/2021 | EPI_ISL_3895792 | 2021-09-02      |
| hCoV-19/Japan/PG-83142/2021 | EPI_ISL_3895793 | 2021-09-02      |
| hCoV-19/Japan/PG-83143/2021 | EPI_ISL_3895794 | 2021-09-02      |
| hCoV-19/Japan/PG-83144/2021 | EPI_ISL_3895795 | 2021-09-02      |
| hCoV-19/Japan/PG-83145/2021 | EPI_ISL_3895796 | 2021-09-02      |
| hCoV-19/Japan/PG-83146/2021 | EPI_ISL_3895797 | 2021-09-02      |
| hCoV-19/Japan/PG-83147/2021 | EPI_ISL_3895798 | 2021-09-02      |
| hCoV-19/Japan/PG-83148/2021 | EPI_ISL_3895799 | 2021-09-02      |
| hCoV-19/Japan/PG-83149/2021 | EPI_ISL_3895800 | 2021-09-02      |
| hCoV-19/Japan/PG-83150/2021 | EPI_ISL_3895801 | 2021-09-02      |
| hCoV-19/Japan/PG-83151/2021 | EPI_ISL_3895802 | 2021-09-02      |
| hCoV-19/Japan/PG-83152/2021 | EPI_ISL_3895803 | 2021-09-02      |
| hCoV-19/Japan/PG-83153/2021 | EPI_ISL_3895804 | 2021-09-02      |
| hCoV-19/Japan/PG-83154/2021 | EPI_ISL_3895805 | 2021-09-02      |
| hCoV-19/Japan/PG-83155/2021 | EPI_ISL_3895806 | 2021-09-02      |
| hCoV-19/Japan/PG-83156/2021 | EPI_ISL_3895807 | 2021-09-02      |
| hCoV-19/Japan/PG-83157/2021 | EPI_ISL_3895808 | 2021-09-02      |
| hCoV-19/Japan/PG-83158/2021 | EPI_ISL_3895809 | 2021-09-02      |
| hCoV-19/Japan/PG-83159/2021 | EPI_ISL_3895810 | 2021-09-02      |
| hCoV-19/Japan/PG-83160/2021 | EPI_ISL_3895811 | 2021-09-02      |
| hCoV-19/Japan/PG-83161/2021 | EPI_ISL_3895812 | 2021-09-02      |
| hCoV-19/Japan/PG-83162/2021 | EPI_ISL_3895813 | 2021-09-02      |
| hCoV-19/Japan/PG-83163/2021 | EPI_ISL_3895814 | 2021-09-02      |
| hCoV-19/Japan/PG-83164/2021 | EPI_ISL_3895815 | 2021-09-02      |
| hCoV-19/Japan/PG-83165/2021 | EPI_ISL_3895816 | 2021-09-02      |
| hCoV-19/Japan/PG-83166/2021 | EPI_ISL_3895817 | 2021-09-02      |
| hCoV-19/Japan/PG-83167/2021 | EPI_ISL_3895818 | 2021-09-02      |
| hCoV-19/Japan/PG-83168/2021 | EPI_ISL_3895819 | 2021-09-02      |
| hCoV-19/Japan/PG-83169/2021 | EPI_ISL_3895820 | 2021-09-02      |
| hCoV-19/Japan/PG-83170/2021 | EPI_ISL_3895821 | 2021-09-02      |
| hCoV-19/Japan/PG-83171/2021 | EPI_ISL_3895822 | 2021-09-02      |
| hCoV-19/Japan/PG-83172/2021 | EPI_ISL_3895823 | 2021-09-02      |
| hCoV-19/Japan/PG-83173/2021 | EPI_ISL_3895824 | 2021-09-02      |
| hCoV-19/Japan/PG-83174/2021 | EPI_ISL_3895825 | 2021-09-02      |
| hCoV-19/Japan/PG-83175/2021 | EPI_ISL_3895826 | 2021-09-02      |
| hCoV-19/Japan/PG-83176/2021 | EPI_ISL_3895827 | 2021-09-02      |
| hCoV-19/Japan/PG-83177/2021 | EPI_ISL_3895828 | 2021-09-02      |

| virus_name                  | epiID           | submission_date |
|-----------------------------|-----------------|-----------------|
| hCoV-19/Japan/PG-83178/2021 | EPI_ISL_3895829 | 2021-09-02      |
| hCoV-19/Japan/PG-83179/2021 | EPI_ISL_3895830 | 2021-09-02      |
| hCoV-19/Japan/PG-83180/2021 | EPI_ISL_3895831 | 2021-09-02      |
| hCoV-19/Japan/PG-83181/2021 | EPI_ISL_3895832 | 2021-09-02      |
| hCoV-19/Japan/PG-83182/2021 | EPI_ISL_3895833 | 2021-09-02      |
| hCoV-19/Japan/PG-83183/2021 | EPI_ISL_3895834 | 2021-09-02      |
| hCoV-19/Japan/PG-83184/2021 | EPI_ISL_3895835 | 2021-09-02      |
| hCoV-19/Japan/PG-83185/2021 | EPI_ISL_3895836 | 2021-09-02      |
| hCoV-19/Japan/PG-83186/2021 | EPI_ISL_3895837 | 2021-09-02      |
| hCoV-19/Japan/PG-83187/2021 | EPI_ISL_3895838 | 2021-09-02      |
| hCoV-19/Japan/PG-83188/2021 | EPI_ISL_3895839 | 2021-09-02      |
| hCoV-19/Japan/PG-83189/2021 | EPI_ISL_3895840 | 2021-09-02      |
| hCoV-19/Japan/PG-83190/2021 | EPI_ISL_3895841 | 2021-09-02      |
| hCoV-19/Japan/PG-83191/2021 | EPI_ISL_3895842 | 2021-09-02      |
| hCoV-19/Japan/PG-83192/2021 | EPI_ISL_3895843 | 2021-09-02      |
| hCoV-19/Japan/PG-83193/2021 | EPI_ISL_3895844 | 2021-09-02      |
| hCoV-19/Japan/PG-83194/2021 | EPI_ISL_3895845 | 2021-09-02      |
| hCoV-19/Japan/PG-83195/2021 | EPI_ISL_3895846 | 2021-09-02      |
| hCoV-19/Japan/PG-83196/2021 | EPI_ISL_3895847 | 2021-09-02      |
| hCoV-19/Japan/PG-83197/2021 | EPI_ISL_3895848 | 2021-09-02      |
| hCoV-19/Japan/PG-83198/2021 | EPI_ISL_3895850 | 2021-09-02      |
| hCoV-19/Japan/PG-83199/2021 | EPI_ISL_3895851 | 2021-09-02      |
| hCoV-19/Japan/PG-83200/2021 | EPI_ISL_3895852 | 2021-09-02      |
| hCoV-19/Japan/PG-83201/2021 | EPI_ISL_3895853 | 2021-09-02      |
| hCoV-19/Japan/PG-83202/2021 | EPI_ISL_3895854 | 2021-09-02      |
| hCoV-19/Japan/PG-83203/2021 | EPI_ISL_3895855 | 2021-09-02      |
| hCoV-19/Japan/PG-83204/2021 | EPI_ISL_3895856 | 2021-09-02      |
| hCoV-19/Japan/PG-83205/2021 | EPI_ISL_3895857 | 2021-09-02      |
| hCoV-19/Japan/PG-83206/2021 | EPI_ISL_3895858 | 2021-09-02      |
| hCoV-19/Japan/PG-83207/2021 | EPI_ISL_3895859 | 2021-09-02      |
| hCoV-19/Japan/PG-83208/2021 | EPI_ISL_3895860 | 2021-09-02      |
| hCoV-19/Japan/PG-83209/2021 | EPI_ISL_3895861 | 2021-09-02      |
| hCoV-19/Japan/PG-83210/2021 | EPI_ISL_3895862 | 2021-09-02      |
| hCoV-19/Japan/PG-83211/2021 | EPI_ISL_3895863 | 2021-09-02      |
| hCoV-19/Japan/PG-83212/2021 | EPI_ISL_3895864 | 2021-09-02      |
| hCoV-19/Japan/PG-83213/2021 | EPI_ISL_3895865 | 2021-09-02      |
| hCoV-19/Japan/PG-83214/2021 | EPI_ISL_3895866 | 2021-09-02      |
| hCoV-19/Japan/PG-83215/2021 | EPI_ISL_3895867 | 2021-09-02      |
| hCoV-19/Japan/PG-83216/2021 | EPI_ISL_3895868 | 2021-09-02      |
| hCoV-19/Japan/PG-83217/2021 | EPI_ISL_3895869 | 2021-09-02      |
| hCoV-19/Japan/PG-83218/2021 | EPI_ISL_3895870 | 2021-09-02      |
| hCoV-19/Japan/PG-83219/2021 | EPI_ISL_3895871 | 2021-09-02      |
| hCoV-19/Japan/PG-83220/2021 | EPI_ISL_3895872 | 2021-09-02      |
| hCoV-19/Japan/PG-83221/2021 | EPI_ISL_3895873 | 2021-09-02      |
| hCoV-19/Japan/PG-83222/2021 | EPI_ISL_3895874 | 2021-09-02      |
| hCoV-19/Japan/PG-83223/2021 | EPI_ISL_3895875 | 2021-09-02      |
| hCoV-19/Japan/PG-83224/2021 | EPI_ISL_3895876 | 2021-09-02      |
| hCoV-19/Japan/PG-83225/2021 | EPI_ISL_3895877 | 2021-09-02      |
| hCoV-19/Japan/PG-83226/2021 | EPI_ISL_3895878 | 2021-09-02      |
| hCoV-19/Japan/PG-83227/2021 | EPI_ISL_3895879 | 2021-09-02      |
| hCoV-19/Japan/PG-83228/2021 | EPI_ISL_3895880 | 2021-09-02      |
| hCoV-19/Japan/PG-83229/2021 | EPI_ISL_3895881 | 2021-09-02      |
| hCoV-19/Japan/PG-83230/2021 | EPI_ISL_3895882 | 2021-09-02      |
| hCoV-19/Japan/PG-83231/2021 | EPI_ISL_3895883 | 2021-09-02      |

| virus_name                  | epiID           | submission_date |
|-----------------------------|-----------------|-----------------|
| hCoV-19/Japan/PG-83232/2021 | EPI_ISL_3895884 | 2021-09-02      |
| hCoV-19/Japan/PG-83233/2021 | EPI_ISL_3895885 | 2021-09-02      |
| hCoV-19/Japan/PG-83234/2021 | EPI_ISL_3895886 | 2021-09-02      |
| hCoV-19/Japan/PG-83235/2021 | EPI_ISL_3895887 | 2021-09-02      |
| hCoV-19/Japan/PG-83236/2021 | EPI_ISL_3895888 | 2021-09-02      |
| hCoV-19/Japan/PG-83237/2021 | EPI_ISL_3895889 | 2021-09-02      |
| hCoV-19/Japan/PG-83238/2021 | EPI_ISL_3895890 | 2021-09-02      |
| hCoV-19/Japan/PG-83239/2021 | EPI_ISL_3895891 | 2021-09-02      |
| hCoV-19/Japan/PG-83240/2021 | EPI_ISL_3895892 | 2021-09-02      |
| hCoV-19/Japan/PG-83241/2021 | EPI_ISL_3895893 | 2021-09-02      |
| hCoV-19/Japan/PG-83242/2021 | EPI_ISL_3895894 | 2021-09-02      |
| hCoV-19/Japan/PG-83243/2021 | EPI_ISL_3895895 | 2021-09-02      |
| hCoV-19/Japan/PG-83244/2021 | EPI_ISL_3895896 | 2021-09-02      |
| hCoV-19/Japan/PG-83245/2021 | EPI_ISL_3895897 | 2021-09-02      |
| hCoV-19/Japan/PG-83246/2021 | EPI_ISL_3895898 | 2021-09-02      |
| hCoV-19/Japan/PG-83247/2021 | EPI_ISL_3895899 | 2021-09-02      |
| hCoV-19/Japan/PG-83248/2021 | EPI_ISL_3895900 | 2021-09-02      |
| hCoV-19/Japan/PG-83249/2021 | EPI_ISL_3895901 | 2021-09-02      |
| hCoV-19/Japan/PG-83250/2021 | EPI_ISL_3895902 | 2021-09-02      |
| hCoV-19/Japan/PG-83251/2021 | EPI_ISL_3895903 | 2021-09-02      |
| hCoV-19/Japan/PG-83252/2021 | EPI_ISL_3895904 | 2021-09-02      |
| hCoV-19/Japan/PG-83253/2021 | EPI_ISL_3895905 | 2021-09-02      |
| hCoV-19/Japan/PG-83254/2021 | EPI_ISL_3895906 | 2021-09-02      |
| hCoV-19/Japan/PG-83255/2021 | EPI_ISL_3895907 | 2021-09-02      |
| hCoV-19/Japan/PG-83256/2021 | EPI_ISL_3895908 | 2021-09-02      |
| hCoV-19/Japan/PG-83257/2021 | EPI_ISL_3895909 | 2021-09-02      |
| hCoV-19/Japan/PG-83258/2021 | EPI_ISL_3895910 | 2021-09-02      |
| hCoV-19/Japan/PG-83259/2021 | EPI_ISL_3895911 | 2021-09-02      |
| hCoV-19/Japan/PG-83260/2021 | EPI_ISL_3895912 | 2021-09-02      |
| hCoV-19/Japan/PG-83261/2021 | EPI_ISL_3895913 | 2021-09-02      |
| hCoV-19/Japan/PG-83262/2021 | EPI_ISL_3895914 | 2021-09-02      |
| hCoV-19/Japan/PG-83263/2021 | EPI_ISL_3895915 | 2021-09-02      |
| hCoV-19/Japan/PG-83264/2021 | EPI_ISL_3895916 | 2021-09-02      |
| hCoV-19/Japan/PG-83265/2021 | EPI_ISL_3895917 | 2021-09-02      |
| hCoV-19/Japan/PG-83266/2021 | EPI_ISL_3895918 | 2021-09-02      |
| hCoV-19/Japan/PG-83267/2021 | EPI_ISL_3895919 | 2021-09-02      |
| hCoV-19/Japan/PG-83268/2021 | EPI_ISL_3895920 | 2021-09-02      |
| hCoV-19/Japan/PG-83269/2021 | EPI_ISL_3895921 | 2021-09-02      |
| hCoV-19/Japan/PG-83270/2021 | EPI_ISL_3895922 | 2021-09-02      |
| hCoV-19/Japan/PG-83271/2021 | EPI_ISL_3895923 | 2021-09-02      |
| hCoV-19/Japan/PG-83272/2021 | EPI_ISL_3895924 | 2021-09-02      |
| hCoV-19/Japan/PG-83273/2021 | EPI_ISL_3895925 | 2021-09-02      |
| hCoV-19/Japan/PG-83274/2021 | EPI_ISL_3895926 | 2021-09-02      |
| hCoV-19/Japan/PG-83275/2021 | EPI_ISL_3895927 | 2021-09-02      |
| hCoV-19/Japan/PG-83276/2021 | EPI_ISL_3895928 | 2021-09-02      |
| hCoV-19/Japan/PG-83277/2021 | EPI_ISL_3895929 | 2021-09-02      |
| hCoV-19/Japan/PG-83278/2021 | EPI_ISL_3895930 | 2021-09-02      |
| hCoV-19/Japan/PG-83279/2021 | EPI_ISL_3895931 | 2021-09-02      |
| hCoV-19/Japan/PG-83280/2021 | EPI_ISL_3895932 | 2021-09-02      |
| hCoV-19/Japan/PG-83281/2021 | EPI_ISL_3895933 | 2021-09-02      |
| hCoV-19/Japan/PG-83282/2021 | EPI_ISL_3895934 | 2021-09-02      |
| hCoV-19/Japan/PG-83283/2021 | EPI_ISL_3895935 | 2021-09-02      |
| hCoV-19/Japan/PG-83284/2021 | EPI_ISL_3895936 | 2021-09-02      |
| hCoV-19/Japan/PG-83285/2021 | EPI_ISL_3895937 | 2021-09-02      |

| virus_name                  | epiID           | submission_date |
|-----------------------------|-----------------|-----------------|
| hCoV-19/Japan/PG-83286/2021 | EPI_ISL_3895938 | 2021-09-02      |
| hCoV-19/Japan/PG-83287/2021 | EPI_ISL_3895939 | 2021-09-02      |
| hCoV-19/Japan/PG-83288/2021 | EPI_ISL_3895940 | 2021-09-02      |
| hCoV-19/Japan/PG-83289/2021 | EPI_ISL_3895941 | 2021-09-02      |
| hCoV-19/Japan/PG-83290/2021 | EPI_ISL_3895942 | 2021-09-02      |
| hCoV-19/Japan/PG-83291/2021 | EPI_ISL_3895943 | 2021-09-02      |
| hCoV-19/Japan/PG-83292/2021 | EPI_ISL_3895944 | 2021-09-02      |
| hCoV-19/Japan/PG-83293/2021 | EPI_ISL_3895945 | 2021-09-02      |
| hCoV-19/Japan/PG-83294/2021 | EPI_ISL_3895946 | 2021-09-02      |
| hCoV-19/Japan/PG-83295/2021 | EPI_ISL_3895947 | 2021-09-02      |
| hCoV-19/Japan/PG-83296/2021 | EPI_ISL_3895948 | 2021-09-02      |
| hCoV-19/Japan/PG-83297/2021 | EPI_ISL_3895949 | 2021-09-02      |
| hCoV-19/Japan/PG-83298/2021 | EPI_ISL_3895950 | 2021-09-02      |
| hCoV-19/Japan/PG-83299/2021 | EPI_ISL_3895951 | 2021-09-02      |
| hCoV-19/Japan/PG-83300/2021 | EPI_ISL_3895952 | 2021-09-02      |
| hCoV-19/Japan/PG-83301/2021 | EPI_ISL_3895953 | 2021-09-02      |
| hCoV-19/Japan/PG-83302/2021 | EPI_ISL_3895954 | 2021-09-02      |
| hCoV-19/Japan/PG-83303/2021 | EPI_ISL_3895955 | 2021-09-02      |
| hCoV-19/Japan/PG-83304/2021 | EPI_ISL_3895956 | 2021-09-02      |
| hCoV-19/Japan/PG-83305/2021 | EPI_ISL_3895957 | 2021-09-02      |
| hCoV-19/Japan/PG-83306/2021 | EPI_ISL_3895958 | 2021-09-02      |
| hCoV-19/Japan/PG-83307/2021 | EPI_ISL_3895959 | 2021-09-02      |
| hCoV-19/Japan/PG-83308/2021 | EPI_ISL_3895960 | 2021-09-02      |
| hCoV-19/Japan/PG-83309/2021 | EPI_ISL_3895961 | 2021-09-02      |
| hCoV-19/Japan/PG-83310/2021 | EPI_ISL_3895962 | 2021-09-02      |
| hCoV-19/Japan/PG-83311/2021 | EPI_ISL_3895963 | 2021-09-02      |
| hCoV-19/Japan/PG-83312/2021 | EPI_ISL_3895964 | 2021-09-02      |
| hCoV-19/Japan/PG-83313/2021 | EPI_ISL_3895965 | 2021-09-02      |
| hCoV-19/Japan/PG-83314/2021 | EPI_ISL_3895966 | 2021-09-02      |
| hCoV-19/Japan/PG-83315/2021 | EPI_ISL_3895967 | 2021-09-02      |
| hCoV-19/Japan/PG-83316/2021 | EPI_ISL_3895968 | 2021-09-02      |
| hCoV-19/Japan/PG-83317/2021 | EPI_ISL_3895969 | 2021-09-02      |
| hCoV-19/Japan/PG-83318/2021 | EPI_ISL_3895970 | 2021-09-02      |
| hCoV-19/Japan/PG-83319/2021 | EPI_ISL_3895971 | 2021-09-02      |
| hCoV-19/Japan/PG-83320/2021 | EPI_ISL_3895972 | 2021-09-02      |
| hCoV-19/Japan/PG-83321/2021 | EPI_ISL_3895973 | 2021-09-02      |
| hCoV-19/Japan/PG-83322/2021 | EPI_ISL_3895974 | 2021-09-02      |
| hCoV-19/Japan/PG-83323/2021 | EPI_ISL_3895975 | 2021-09-02      |
| hCoV-19/Japan/PG-83324/2021 | EPI_ISL_3895976 | 2021-09-02      |
| hCoV-19/Japan/PG-83325/2021 | EPI_ISL_3895977 | 2021-09-02      |
| hCoV-19/Japan/PG-83326/2021 | EPI_ISL_3895978 | 2021-09-02      |
| hCoV-19/Japan/PG-83327/2021 | EPI_ISL_3895979 | 2021-09-02      |
| hCoV-19/Japan/PG-83328/2021 | EPI_ISL_3895980 | 2021-09-02      |
| hCoV-19/Japan/PG-83329/2021 | EPI_ISL_3895981 | 2021-09-02      |
| hCoV-19/Japan/PG-83330/2021 | EPI_ISL_3895982 | 2021-09-02      |
| hCoV-19/Japan/PG-83331/2021 | EPI_ISL_3895983 | 2021-09-02      |
| hCoV-19/Japan/PG-83332/2021 | EPI_ISL_3895984 | 2021-09-02      |
| hCoV-19/Japan/PG-83333/2021 | EPI_ISL_3895985 | 2021-09-02      |
| hCoV-19/Japan/PG-83334/2021 | EPI_ISL_3895986 | 2021-09-02      |
| hCoV-19/Japan/PG-83335/2021 | EPI_ISL_3895987 | 2021-09-02      |
| hCoV-19/Japan/PG-83336/2021 | EPI_ISL_3895988 | 2021-09-02      |
| hCoV-19/Japan/PG-83337/2021 | EPI_ISL_3895989 | 2021-09-02      |
| hCoV-19/Japan/PG-83338/2021 | EPI_ISL_3895990 | 2021-09-02      |
| hCoV-19/Japan/PG-83339/2021 | EPI_ISL_3895991 | 2021-09-02      |



| virus_name                  | epiID           | submission_date |
|-----------------------------|-----------------|-----------------|
| hCoV-19/Japan/PG-83340/2021 | EPI_ISL_3895992 | 2021-09-02      |
| hCoV-19/Japan/PG-83341/2021 | EPI_ISL_3895993 | 2021-09-02      |
| hCoV-19/Japan/PG-83342/2021 | EPI_ISL_3895994 | 2021-09-02      |
| hCoV-19/Japan/PG-83343/2021 | EPI_ISL_3895995 | 2021-09-02      |
| hCoV-19/Japan/PG-83344/2021 | EPI_ISL_3895996 | 2021-09-02      |
| hCoV-19/Japan/PG-83345/2021 | EPI_ISL_3895997 | 2021-09-02      |
| hCoV-19/Japan/PG-83346/2021 | EPI_ISL_3895998 | 2021-09-02      |
| hCoV-19/Japan/PG-83347/2021 | EPI_ISL_3895999 | 2021-09-02      |
| hCoV-19/Japan/PG-83348/2021 | EPI_ISL_3896000 | 2021-09-02      |
| hCoV-19/Japan/PG-83349/2021 | EPI_ISL_3896001 | 2021-09-02      |
| hCoV-19/Japan/PG-83350/2021 | EPI_ISL_3896002 | 2021-09-02      |
| hCoV-19/Japan/PG-83351/2021 | EPI_ISL_3896003 | 2021-09-02      |
| hCoV-19/Japan/PG-83352/2021 | EPI_ISL_3896004 | 2021-09-02      |
| hCoV-19/Japan/PG-83353/2021 | EPI_ISL_3896005 | 2021-09-02      |
| hCoV-19/Japan/PG-83354/2021 | EPI_ISL_3896006 | 2021-09-02      |
| hCoV-19/Japan/PG-83355/2021 | EPI_ISL_3896007 | 2021-09-02      |
| hCoV-19/Japan/PG-83356/2021 | EPI_ISL_3896008 | 2021-09-02      |
| hCoV-19/Japan/PG-83357/2021 | EPI_ISL_3896009 | 2021-09-02      |
| hCoV-19/Japan/PG-83358/2021 | EPI_ISL_3896010 | 2021-09-02      |
| hCoV-19/Japan/PG-83359/2021 | EPI_ISL_3896011 | 2021-09-02      |
| hCoV-19/Japan/PG-83360/2021 | EPI_ISL_3896012 | 2021-09-02      |
| hCoV-19/Japan/PG-83361/2021 | EPI_ISL_3896013 | 2021-09-02      |
| hCoV-19/Japan/PG-83362/2021 | EPI_ISL_3896014 | 2021-09-02      |
| hCoV-19/Japan/PG-83363/2021 | EPI_ISL_3896015 | 2021-09-02      |
| hCoV-19/Japan/PG-83364/2021 | EPI_ISL_3896016 | 2021-09-02      |
| hCoV-19/Japan/PG-83365/2021 | EPI_ISL_3896017 | 2021-09-02      |
| hCoV-19/Japan/PG-83366/2021 | EPI_ISL_3896018 | 2021-09-02      |
| hCoV-19/Japan/PG-83367/2021 | EPI_ISL_3896019 | 2021-09-02      |
| hCoV-19/Japan/PG-83368/2021 | EPI_ISL_3896020 | 2021-09-02      |
| hCoV-19/Japan/PG-83369/2021 | EPI_ISL_3896021 | 2021-09-02      |
| hCoV-19/Japan/PG-83370/2021 | EPI_ISL_3896022 | 2021-09-02      |
| hCoV-19/Japan/PG-83371/2021 | EPI_ISL_3896023 | 2021-09-02      |
| hCoV-19/Japan/PG-83372/2021 | EPI_ISL_3896024 | 2021-09-02      |
| hCoV-19/Japan/PG-83373/2021 | EPI_ISL_3896025 | 2021-09-02      |
| hCoV-19/Japan/PG-83374/2021 | EPI_ISL_3896026 | 2021-09-02      |
| hCoV-19/Japan/PG-83375/2021 | EPI_ISL_3896027 | 2021-09-02      |
| hCoV-19/Japan/PG-83376/2021 | EPI_ISL_3896028 | 2021-09-02      |
| hCoV-19/Japan/PG-83377/2021 | EPI_ISL_3896029 | 2021-09-02      |
| hCoV-19/Japan/PG-83378/2021 | EPI_ISL_3896030 | 2021-09-02      |
| hCoV-19/Japan/PG-83379/2021 | EPI_ISL_3896031 | 2021-09-02      |
| hCoV-19/Japan/PG-83380/2021 | EPI_ISL_3896032 | 2021-09-02      |
| hCoV-19/Japan/PG-83381/2021 | EPI_ISL_3896033 | 2021-09-02      |
| hCoV-19/Japan/PG-83382/2021 | EPI_ISL_3896034 | 2021-09-02      |
| hCoV-19/Japan/PG-83383/2021 | EPI_ISL_3896035 | 2021-09-02      |
| hCoV-19/Japan/PG-83384/2021 | EPI_ISL_3896036 | 2021-09-02      |
| hCoV-19/Japan/PG-83385/2021 | EPI_ISL_3896037 | 2021-09-02      |
| hCoV-19/Japan/PG-83386/2021 | EPI_ISL_3896038 | 2021-09-02      |
| hCoV-19/Japan/PG-83387/2021 | EPI_ISL_3896039 | 2021-09-02      |
| hCoV-19/Japan/PG-83388/2021 | EPI_ISL_3896040 | 2021-09-02      |
| hCoV-19/Japan/PG-83389/2021 | EPI_ISL_3896041 | 2021-09-02      |
| hCoV-19/Japan/PG-83390/2021 | EPI_ISL_3896042 | 2021-09-02      |
| hCoV-19/Japan/PG-83391/2021 | EPI_ISL_3896043 | 2021-09-02      |
| hCoV-19/Japan/PG-83392/2021 | EPI_ISL_3896044 | 2021-09-02      |
| hCoV-19/Japan/PG-83393/2021 | EPI_ISL_3896045 | 2021-09-02      |

| virus_name                  | epiID           | submission_date |
|-----------------------------|-----------------|-----------------|
| hCoV-19/Japan/PG-83394/2021 | EPI_ISL_3896046 | 2021-09-02      |
| hCoV-19/Japan/PG-83395/2021 | EPI_ISL_3896047 | 2021-09-02      |
| hCoV-19/Japan/PG-83396/2021 | EPI_ISL_3896048 | 2021-09-02      |
| hCoV-19/Japan/PG-83397/2021 | EPI_ISL_3896049 | 2021-09-02      |
| hCoV-19/Japan/PG-83398/2021 | EPI_ISL_3896050 | 2021-09-02      |
| hCoV-19/Japan/PG-83399/2021 | EPI_ISL_3896051 | 2021-09-02      |
| hCoV-19/Japan/PG-83400/2021 | EPI_ISL_3896052 | 2021-09-02      |
| hCoV-19/Japan/PG-83401/2021 | EPI_ISL_3896053 | 2021-09-02      |
| hCoV-19/Japan/PG-83402/2021 | EPI_ISL_3896054 | 2021-09-02      |
| hCoV-19/Japan/PG-83403/2021 | EPI_ISL_3896055 | 2021-09-02      |
| hCoV-19/Japan/PG-83404/2021 | EPI_ISL_3896056 | 2021-09-02      |
| hCoV-19/Japan/PG-83405/2021 | EPI_ISL_3896057 | 2021-09-02      |
| hCoV-19/Japan/PG-83406/2021 | EPI_ISL_3896058 | 2021-09-02      |
| hCoV-19/Japan/PG-83407/2021 | EPI_ISL_3896059 | 2021-09-02      |
| hCoV-19/Japan/PG-83408/2021 | EPI_ISL_3896060 | 2021-09-02      |
| hCoV-19/Japan/PG-83409/2021 | EPI_ISL_3896061 | 2021-09-02      |
| hCoV-19/Japan/PG-83410/2021 | EPI_ISL_3896062 | 2021-09-02      |
| hCoV-19/Japan/PG-83411/2021 | EPI_ISL_3896063 | 2021-09-02      |
| hCoV-19/Japan/PG-83412/2021 | EPI_ISL_3896064 | 2021-09-02      |
| hCoV-19/Japan/PG-83413/2021 | EPI_ISL_3896065 | 2021-09-02      |
| hCoV-19/Japan/PG-83414/2021 | EPI_ISL_3896066 | 2021-09-02      |
| hCoV-19/Japan/PG-83415/2021 | EPI_ISL_3896067 | 2021-09-02      |
| hCoV-19/Japan/PG-83416/2021 | EPI_ISL_3896068 | 2021-09-02      |
| hCoV-19/Japan/PG-83417/2021 | EPI_ISL_3896069 | 2021-09-02      |
| hCoV-19/Japan/PG-83418/2021 | EPI_ISL_3896070 | 2021-09-02      |
| hCoV-19/Japan/PG-83419/2021 | EPI_ISL_3896071 | 2021-09-02      |
| hCoV-19/Japan/PG-83420/2021 | EPI_ISL_3896072 | 2021-09-02      |
| hCoV-19/Japan/PG-83421/2021 | EPI_ISL_3896073 | 2021-09-02      |
| hCoV-19/Japan/PG-83422/2021 | EPI_ISL_3896074 | 2021-09-02      |
| hCoV-19/Japan/PG-83423/2021 | EPI_ISL_3896075 | 2021-09-02      |
| hCoV-19/Japan/PG-83424/2021 | EPI_ISL_3896076 | 2021-09-02      |
| hCoV-19/Japan/PG-83425/2021 | EPI_ISL_3896077 | 2021-09-02      |
| hCoV-19/Japan/PG-83426/2021 | EPI_ISL_3896078 | 2021-09-02      |
| hCoV-19/Japan/PG-83427/2021 | EPI_ISL_3896079 | 2021-09-02      |
| hCoV-19/Japan/PG-83428/2021 | EPI_ISL_3896080 | 2021-09-02      |
| hCoV-19/Japan/PG-83429/2021 | EPI_ISL_3896081 | 2021-09-02      |
| hCoV-19/Japan/PG-83430/2021 | EPI_ISL_3896082 | 2021-09-02      |
| hCoV-19/Japan/PG-83431/2021 | EPI_ISL_3896083 | 2021-09-02      |
| hCoV-19/Japan/PG-83432/2021 | EPI_ISL_3896084 | 2021-09-02      |
| hCoV-19/Japan/PG-83433/2021 | EPI_ISL_3896085 | 2021-09-02      |
| hCoV-19/Japan/PG-83434/2021 | EPI_ISL_3896086 | 2021-09-02      |
| hCoV-19/Japan/PG-83435/2021 | EPI_ISL_3896087 | 2021-09-02      |
| hCoV-19/Japan/PG-83436/2021 | EPI_ISL_3896088 | 2021-09-02      |
| hCoV-19/Japan/PG-83437/2021 | EPI_ISL_3896089 | 2021-09-02      |
| hCoV-19/Japan/PG-83438/2021 | EPI_ISL_3896090 | 2021-09-02      |
| hCoV-19/Japan/PG-83439/2021 | EPI_ISL_3896091 | 2021-09-02      |
| hCoV-19/Japan/PG-83440/2021 | EPI_ISL_3896092 | 2021-09-02      |
| hCoV-19/Japan/PG-83441/2021 | EPI_ISL_3896093 | 2021-09-02      |
| hCoV-19/Japan/PG-83442/2021 | EPI_ISL_3896094 | 2021-09-02      |
| hCoV-19/Japan/PG-83443/2021 | EPI_ISL_3896095 | 2021-09-02      |
| hCoV-19/Japan/PG-83444/2021 | EPI_ISL_3896096 | 2021-09-02      |
| hCoV-19/Japan/PG-83445/2021 | EPI_ISL_3896097 | 2021-09-02      |
| hCoV-19/Japan/PG-83446/2021 | EPI_ISL_3896098 | 2021-09-02      |
| hCoV-19/Japan/PG-83447/2021 | EPI_ISL_3896099 | 2021-09-02      |

| virus_name                  | epiID           | submission_date |
|-----------------------------|-----------------|-----------------|
| hCoV-19/Japan/PG-83448/2021 | EPI_ISL_3896100 | 2021-09-02      |
| hCoV-19/Japan/PG-83449/2021 | EPI_ISL_3896101 | 2021-09-02      |
| hCoV-19/Japan/PG-83450/2021 | EPI_ISL_3896102 | 2021-09-02      |
| hCoV-19/Japan/PG-83451/2021 | EPI_ISL_3896103 | 2021-09-02      |
| hCoV-19/Japan/PG-83452/2021 | EPI_ISL_3896104 | 2021-09-02      |
| hCoV-19/Japan/PG-83453/2021 | EPI_ISL_3896105 | 2021-09-02      |
| hCoV-19/Japan/PG-83454/2021 | EPI_ISL_3896106 | 2021-09-02      |
| hCoV-19/Japan/PG-83455/2021 | EPI_ISL_3896107 | 2021-09-02      |
| hCoV-19/Japan/PG-83456/2021 | EPI_ISL_3896108 | 2021-09-02      |
| hCoV-19/Japan/PG-83457/2021 | EPI_ISL_3896109 | 2021-09-02      |
| hCoV-19/Japan/PG-83458/2021 | EPI_ISL_3896110 | 2021-09-02      |
| hCoV-19/Japan/PG-83459/2021 | EPI_ISL_3896111 | 2021-09-02      |
| hCoV-19/Japan/PG-83460/2021 | EPI_ISL_3896112 | 2021-09-02      |
| hCoV-19/Japan/PG-83461/2021 | EPI_ISL_3896113 | 2021-09-02      |
| hCoV-19/Japan/PG-83462/2021 | EPI_ISL_3896114 | 2021-09-02      |
| hCoV-19/Japan/PG-83463/2021 | EPI_ISL_3896115 | 2021-09-02      |
| hCoV-19/Japan/PG-83464/2021 | EPI_ISL_3896116 | 2021-09-02      |
| hCoV-19/Japan/PG-83465/2021 | EPI_ISL_3896117 | 2021-09-02      |
| hCoV-19/Japan/PG-83466/2021 | EPI_ISL_3896118 | 2021-09-02      |
| hCoV-19/Japan/PG-83467/2021 | EPI_ISL_3896119 | 2021-09-02      |
| hCoV-19/Japan/PG-83468/2021 | EPI_ISL_3896120 | 2021-09-02      |
| hCoV-19/Japan/PG-83469/2021 | EPI_ISL_3896121 | 2021-09-02      |
| hCoV-19/Japan/PG-83470/2021 | EPI_ISL_3896122 | 2021-09-02      |
| hCoV-19/Japan/PG-83471/2021 | EPI_ISL_3896123 | 2021-09-02      |
| hCoV-19/Japan/PG-83472/2021 | EPI_ISL_3896124 | 2021-09-02      |
| hCoV-19/Japan/PG-83473/2021 | EPI_ISL_3896125 | 2021-09-02      |
| hCoV-19/Japan/PG-83474/2021 | EPI_ISL_3896126 | 2021-09-02      |
| hCoV-19/Japan/PG-83475/2021 | EPI_ISL_3896127 | 2021-09-02      |
| hCoV-19/Japan/PG-83476/2021 | EPI_ISL_3896128 | 2021-09-02      |
| hCoV-19/Japan/PG-83477/2021 | EPI_ISL_3896129 | 2021-09-02      |
| hCoV-19/Japan/PG-83478/2021 | EPI_ISL_3896130 | 2021-09-02      |
| hCoV-19/Japan/PG-83479/2021 | EPI_ISL_3896131 | 2021-09-02      |
| hCoV-19/Japan/PG-83480/2021 | EPI_ISL_3896132 | 2021-09-02      |
| hCoV-19/Japan/PG-83481/2021 | EPI_ISL_3896133 | 2021-09-02      |
| hCoV-19/Japan/PG-83482/2021 | EPI_ISL_3896134 | 2021-09-02      |
| hCoV-19/Japan/PG-83483/2021 | EPI_ISL_3896135 | 2021-09-02      |
| hCoV-19/Japan/PG-83484/2021 | EPI_ISL_3896136 | 2021-09-02      |
| hCoV-19/Japan/PG-83485/2021 | EPI_ISL_3896137 | 2021-09-02      |
| hCoV-19/Japan/PG-83486/2021 | EPI_ISL_3896138 | 2021-09-02      |
| hCoV-19/Japan/PG-83487/2021 | EPI_ISL_3896139 | 2021-09-02      |
| hCoV-19/Japan/PG-83488/2021 | EPI_ISL_3896140 | 2021-09-02      |
| hCoV-19/Japan/PG-83489/2021 | EPI_ISL_3896141 | 2021-09-02      |
| hCoV-19/Japan/PG-83490/2021 | EPI_ISL_3896142 | 2021-09-02      |
| hCoV-19/Japan/PG-83491/2021 | EPI_ISL_3896143 | 2021-09-02      |
| hCoV-19/Japan/PG-83492/2021 | EPI_ISL_3896144 | 2021-09-02      |
| hCoV-19/Japan/PG-83493/2021 | EPI_ISL_3896145 | 2021-09-02      |
| hCoV-19/Japan/PG-83494/2021 | EPI_ISL_3896146 | 2021-09-02      |
| hCoV-19/Japan/PG-83495/2021 | EPI_ISL_3896147 | 2021-09-02      |
| hCoV-19/Japan/PG-83496/2021 | EPI_ISL_3896148 | 2021-09-02      |
| hCoV-19/Japan/PG-83497/2021 | EPI_ISL_3896149 | 2021-09-02      |
| hCoV-19/Japan/PG-83498/2021 | EPI_ISL_3896150 | 2021-09-02      |
| hCoV-19/Japan/PG-83499/2021 | EPI_ISL_3896151 | 2021-09-02      |
| hCoV-19/Japan/PG-83500/2021 | EPI_ISL_3896152 | 2021-09-02      |
| hCoV-19/Japan/PG-83501/2021 | EPI_ISL_3896153 | 2021-09-02      |

| virus_name                  | epiID           | submission_date |
|-----------------------------|-----------------|-----------------|
| hCoV-19/Japan/PG-83502/2021 | EPI_ISL_3896154 | 2021-09-02      |
| hCoV-19/Japan/PG-83503/2021 | EPI_ISL_3896155 | 2021-09-02      |
| hCoV-19/Japan/PG-83504/2021 | EPI_ISL_3896156 | 2021-09-02      |
| hCoV-19/Japan/PG-83505/2021 | EPI_ISL_3896157 | 2021-09-02      |
| hCoV-19/Japan/PG-83506/2021 | EPI_ISL_3896158 | 2021-09-02      |
| hCoV-19/Japan/PG-83507/2021 | EPI_ISL_3896159 | 2021-09-02      |
| hCoV-19/Japan/PG-83508/2021 | EPI_ISL_3896160 | 2021-09-02      |
| hCoV-19/Japan/PG-83509/2021 | EPI_ISL_3896161 | 2021-09-02      |
| hCoV-19/Japan/PG-83510/2021 | EPI_ISL_3896162 | 2021-09-02      |
| hCoV-19/Japan/PG-83511/2021 | EPI_ISL_3896163 | 2021-09-02      |
| hCoV-19/Japan/PG-83512/2021 | EPI_ISL_3896164 | 2021-09-02      |
| hCoV-19/Japan/PG-83513/2021 | EPI_ISL_3896165 | 2021-09-02      |
| hCoV-19/Japan/PG-83514/2021 | EPI_ISL_3896166 | 2021-09-02      |
| hCoV-19/Japan/PG-83515/2021 | EPI_ISL_3896167 | 2021-09-02      |
| hCoV-19/Japan/PG-83516/2021 | EPI_ISL_3896168 | 2021-09-02      |
| hCoV-19/Japan/PG-83517/2021 | EPI_ISL_3896169 | 2021-09-02      |
| hCoV-19/Japan/PG-83518/2021 | EPI_ISL_3896170 | 2021-09-02      |
| hCoV-19/Japan/PG-83519/2021 | EPI_ISL_3896171 | 2021-09-02      |
| hCoV-19/Japan/PG-83520/2021 | EPI_ISL_3896172 | 2021-09-02      |
| hCoV-19/Japan/PG-83521/2021 | EPI_ISL_3896173 | 2021-09-02      |
| hCoV-19/Japan/PG-83522/2021 | EPI_ISL_3896174 | 2021-09-02      |
| hCoV-19/Japan/PG-83523/2021 | EPI_ISL_3896175 | 2021-09-02      |
| hCoV-19/Japan/PG-83524/2021 | EPI_ISL_3896176 | 2021-09-02      |
| hCoV-19/Japan/PG-83525/2021 | EPI_ISL_3896177 | 2021-09-02      |
| hCoV-19/Japan/PG-83526/2021 | EPI_ISL_3896178 | 2021-09-02      |
| hCoV-19/Japan/PG-83527/2021 | EPI_ISL_3896179 | 2021-09-02      |
| hCoV-19/Japan/PG-83528/2021 | EPI_ISL_3896180 | 2021-09-02      |
| hCoV-19/Japan/PG-83529/2021 | EPI_ISL_3896181 | 2021-09-02      |
| hCoV-19/Japan/PG-83530/2021 | EPI_ISL_3896182 | 2021-09-02      |
| hCoV-19/Japan/PG-83531/2021 | EPI_ISL_3896183 | 2021-09-02      |
| hCoV-19/Japan/PG-83532/2021 | EPI_ISL_3896184 | 2021-09-02      |
| hCoV-19/Japan/PG-83533/2021 | EPI_ISL_3896185 | 2021-09-02      |
| hCoV-19/Japan/PG-83534/2021 | EPI_ISL_3896186 | 2021-09-02      |
| hCoV-19/Japan/PG-83535/2021 | EPI_ISL_3896187 | 2021-09-02      |
| hCoV-19/Japan/PG-83536/2021 | EPI_ISL_3896188 | 2021-09-02      |
| hCoV-19/Japan/PG-83537/2021 | EPI_ISL_3896189 | 2021-09-02      |
| hCoV-19/Japan/PG-83538/2021 | EPI_ISL_3896190 | 2021-09-02      |
| hCoV-19/Japan/PG-83539/2021 | EPI_ISL_3896191 | 2021-09-02      |
| hCoV-19/Japan/PG-83540/2021 | EPI_ISL_3896192 | 2021-09-02      |
| hCoV-19/Japan/PG-83541/2021 | EPI_ISL_3896193 | 2021-09-02      |
| hCoV-19/Japan/PG-83542/2021 | EPI_ISL_3896194 | 2021-09-02      |
| hCoV-19/Japan/PG-83543/2021 | EPI_ISL_3896195 | 2021-09-02      |
| hCoV-19/Japan/PG-83544/2021 | EPI_ISL_3896196 | 2021-09-02      |
| hCoV-19/Japan/PG-83545/2021 | EPI_ISL_3896197 | 2021-09-02      |
| hCoV-19/Japan/PG-83546/2021 | EPI_ISL_3896198 | 2021-09-02      |
| hCoV-19/Japan/PG-83547/2021 | EPI_ISL_3896199 | 2021-09-02      |
| hCoV-19/Japan/PG-83548/2021 | EPI_ISL_3896200 | 2021-09-02      |
| hCoV-19/Japan/PG-83549/2021 | EPI_ISL_3896201 | 2021-09-02      |
| hCoV-19/Japan/PG-83550/2021 | EPI_ISL_3896202 | 2021-09-02      |
| hCoV-19/Japan/PG-83551/2021 | EPI_ISL_3896203 | 2021-09-02      |
| hCoV-19/Japan/PG-83552/2021 | EPI_ISL_3896204 | 2021-09-02      |
| hCoV-19/Japan/PG-83553/2021 | EPI_ISL_3896205 | 2021-09-02      |
| hCoV-19/Japan/PG-83554/2021 | EPI_ISL_3896206 | 2021-09-02      |
| hCoV-19/Japan/PG-83555/2021 | EPI_ISL_3896207 | 2021-09-02      |

| virus_name                  | epiID           | submission_date |
|-----------------------------|-----------------|-----------------|
| hCoV-19/Japan/PG-83556/2021 | EPI_ISL_3896208 | 2021-09-02      |
| hCoV-19/Japan/PG-83557/2021 | EPI_ISL_3896209 | 2021-09-02      |
| hCoV-19/Japan/PG-83558/2021 | EPI_ISL_3896210 | 2021-09-02      |
| hCoV-19/Japan/PG-83559/2021 | EPI_ISL_3896211 | 2021-09-02      |
| hCoV-19/Japan/PG-83560/2021 | EPI_ISL_3896212 | 2021-09-02      |
| hCoV-19/Japan/PG-83561/2021 | EPI_ISL_3896213 | 2021-09-02      |
| hCoV-19/Japan/PG-83562/2021 | EPI_ISL_3896214 | 2021-09-02      |
| hCoV-19/Japan/PG-83563/2021 | EPI_ISL_3896215 | 2021-09-02      |
| hCoV-19/Japan/PG-83564/2021 | EPI_ISL_3896216 | 2021-09-02      |
| hCoV-19/Japan/PG-83565/2021 | EPI_ISL_3896217 | 2021-09-02      |
| hCoV-19/Japan/PG-83566/2021 | EPI_ISL_3896218 | 2021-09-02      |
| hCoV-19/Japan/PG-83567/2021 | EPI_ISL_3896219 | 2021-09-02      |
| hCoV-19/Japan/PG-83568/2021 | EPI_ISL_3896220 | 2021-09-02      |
| hCoV-19/Japan/PG-83569/2021 | EPI_ISL_3896221 | 2021-09-02      |
| hCoV-19/Japan/PG-83570/2021 | EPI_ISL_3896222 | 2021-09-02      |
| hCoV-19/Japan/PG-83571/2021 | EPI_ISL_3896223 | 2021-09-02      |
| hCoV-19/Japan/PG-83572/2021 | EPI_ISL_3896224 | 2021-09-02      |
| hCoV-19/Japan/PG-83573/2021 | EPI_ISL_3896225 | 2021-09-02      |
| hCoV-19/Japan/PG-83574/2021 | EPI_ISL_3896226 | 2021-09-02      |
| hCoV-19/Japan/PG-83575/2021 | EPI_ISL_3896227 | 2021-09-02      |
| hCoV-19/Japan/PG-83576/2021 | EPI_ISL_3896228 | 2021-09-02      |
| hCoV-19/Japan/PG-83577/2021 | EPI_ISL_3896229 | 2021-09-02      |
| hCoV-19/Japan/PG-83578/2021 | EPI_ISL_3896230 | 2021-09-02      |
| hCoV-19/Japan/PG-83579/2021 | EPI_ISL_3896231 | 2021-09-02      |
| hCoV-19/Japan/PG-83580/2021 | EPI_ISL_3896232 | 2021-09-02      |
| hCoV-19/Japan/PG-83581/2021 | EPI_ISL_3896233 | 2021-09-02      |
| hCoV-19/Japan/PG-83582/2021 | EPI_ISL_3896234 | 2021-09-02      |
| hCoV-19/Japan/PG-83583/2021 | EPI_ISL_3896235 | 2021-09-02      |
| hCoV-19/Japan/PG-83584/2021 | EPI_ISL_3896236 | 2021-09-02      |
| hCoV-19/Japan/PG-83585/2021 | EPI_ISL_3896237 | 2021-09-02      |
| hCoV-19/Japan/PG-83586/2021 | EPI_ISL_3896238 | 2021-09-02      |
| hCoV-19/Japan/PG-83587/2021 | EPI_ISL_3896239 | 2021-09-02      |
| hCoV-19/Japan/PG-83588/2021 | EPI_ISL_3896241 | 2021-09-02      |
| hCoV-19/Japan/PG-83589/2021 | EPI_ISL_3896242 | 2021-09-02      |
| hCoV-19/Japan/PG-83590/2021 | EPI_ISL_3896243 | 2021-09-02      |
| hCoV-19/Japan/PG-83591/2021 | EPI_ISL_3896244 | 2021-09-02      |
| hCoV-19/Japan/PG-83592/2021 | EPI_ISL_3896245 | 2021-09-02      |
| hCoV-19/Japan/PG-83593/2021 | EPI_ISL_3896246 | 2021-09-02      |
| hCoV-19/Japan/PG-83594/2021 | EPI_ISL_3896247 | 2021-09-02      |
| hCoV-19/Japan/PG-83595/2021 | EPI_ISL_3896248 | 2021-09-02      |
| hCoV-19/Japan/PG-83596/2021 | EPI_ISL_3896249 | 2021-09-02      |
| hCoV-19/Japan/PG-83597/2021 | EPI_ISL_3896250 | 2021-09-02      |
| hCoV-19/Japan/PG-83598/2021 | EPI_ISL_3896251 | 2021-09-02      |
| hCoV-19/Japan/PG-83599/2021 | EPI_ISL_3896252 | 2021-09-02      |
| hCoV-19/Japan/PG-83600/2021 | EPI_ISL_3896253 | 2021-09-02      |
| hCoV-19/Japan/PG-83601/2021 | EPI_ISL_3896254 | 2021-09-02      |
| hCoV-19/Japan/PG-83602/2021 | EPI_ISL_3896255 | 2021-09-02      |
| hCoV-19/Japan/PG-83603/2021 | EPI_ISL_3896256 | 2021-09-02      |
| hCoV-19/Japan/PG-83604/2021 | EPI_ISL_3896257 | 2021-09-02      |
| hCoV-19/Japan/PG-83605/2021 | EPI_ISL_3896258 | 2021-09-02      |
| hCoV-19/Japan/PG-83606/2021 | EPI_ISL_3896259 | 2021-09-02      |
| hCoV-19/Japan/PG-83607/2021 | EPI_ISL_3896260 | 2021-09-02      |
| hCoV-19/Japan/PG-83608/2021 | EPI_ISL_3896261 | 2021-09-02      |
| hCoV-19/Japan/PG-83609/2021 | EPI_ISL_3896262 | 2021-09-02      |

| virus_name                  | epiID           | submission_date |
|-----------------------------|-----------------|-----------------|
| hCoV-19/Japan/PG-83610/2021 | EPI_ISL_3896263 | 2021-09-02      |
| hCoV-19/Japan/PG-83611/2021 | EPI_ISL_3896264 | 2021-09-02      |
| hCoV-19/Japan/PG-83612/2021 | EPI_ISL_3896265 | 2021-09-02      |
| hCoV-19/Japan/PG-83613/2021 | EPI_ISL_3896266 | 2021-09-02      |
| hCoV-19/Japan/PG-83614/2021 | EPI_ISL_3896267 | 2021-09-02      |
| hCoV-19/Japan/PG-83615/2021 | EPI_ISL_3896268 | 2021-09-02      |
| hCoV-19/Japan/PG-83616/2021 | EPI_ISL_3896269 | 2021-09-02      |
| hCoV-19/Japan/PG-83617/2021 | EPI_ISL_3896270 | 2021-09-02      |
| hCoV-19/Japan/PG-83618/2021 | EPI_ISL_3896271 | 2021-09-02      |
| hCoV-19/Japan/PG-83619/2021 | EPI_ISL_3896272 | 2021-09-02      |
| hCoV-19/Japan/PG-83620/2021 | EPI_ISL_3896273 | 2021-09-02      |
| hCoV-19/Japan/PG-83621/2021 | EPI_ISL_3896274 | 2021-09-02      |
| hCoV-19/Japan/PG-83622/2021 | EPI_ISL_3896275 | 2021-09-02      |
| hCoV-19/Japan/PG-83623/2021 | EPI_ISL_3896276 | 2021-09-02      |
| hCoV-19/Japan/PG-83624/2021 | EPI_ISL_3896277 | 2021-09-02      |
| hCoV-19/Japan/PG-83625/2021 | EPI_ISL_3896278 | 2021-09-02      |
| hCoV-19/Japan/PG-83626/2021 | EPI_ISL_3896279 | 2021-09-02      |
| hCoV-19/Japan/PG-83627/2021 | EPI_ISL_3896280 | 2021-09-02      |
| hCoV-19/Japan/PG-83628/2021 | EPI_ISL_3896281 | 2021-09-02      |
| hCoV-19/Japan/PG-83629/2021 | EPI_ISL_3896282 | 2021-09-02      |
| hCoV-19/Japan/PG-83630/2021 | EPI_ISL_3896283 | 2021-09-02      |
| hCoV-19/Japan/PG-83631/2021 | EPI_ISL_3896284 | 2021-09-02      |
| hCoV-19/Japan/PG-83632/2021 | EPI_ISL_3896285 | 2021-09-02      |
| hCoV-19/Japan/PG-83633/2021 | EPI_ISL_3896286 | 2021-09-02      |
| hCoV-19/Japan/PG-83634/2021 | EPI_ISL_3896287 | 2021-09-02      |
| hCoV-19/Japan/PG-83635/2021 | EPI_ISL_3896288 | 2021-09-02      |
| hCoV-19/Japan/PG-83636/2021 | EPI_ISL_3896289 | 2021-09-02      |
| hCoV-19/Japan/PG-83637/2021 | EPI_ISL_3896290 | 2021-09-02      |
| hCoV-19/Japan/PG-83638/2021 | EPI_ISL_3896291 | 2021-09-02      |
| hCoV-19/Japan/PG-83639/2021 | EPI_ISL_3896292 | 2021-09-02      |
| hCoV-19/Japan/PG-83640/2021 | EPI_ISL_3896293 | 2021-09-02      |
| hCoV-19/Japan/PG-83641/2021 | EPI_ISL_3896294 | 2021-09-02      |
| hCoV-19/Japan/PG-83642/2021 | EPI_ISL_3896295 | 2021-09-02      |
| hCoV-19/Japan/PG-83643/2021 | EPI_ISL_3896296 | 2021-09-02      |
| hCoV-19/Japan/PG-83644/2021 | EPI_ISL_3896297 | 2021-09-02      |
| hCoV-19/Japan/PG-83645/2021 | EPI_ISL_3896298 | 2021-09-02      |
| hCoV-19/Japan/PG-83646/2021 | EPI_ISL_3896299 | 2021-09-02      |
| hCoV-19/Japan/PG-83647/2021 | EPI_ISL_3896300 | 2021-09-02      |
| hCoV-19/Japan/PG-83648/2021 | EPI_ISL_3896301 | 2021-09-02      |
| hCoV-19/Japan/PG-83649/2021 | EPI_ISL_3896302 | 2021-09-02      |
| hCoV-19/Japan/PG-83650/2021 | EPI_ISL_3896303 | 2021-09-02      |
| hCoV-19/Japan/PG-83651/2021 | EPI_ISL_3896304 | 2021-09-02      |
| hCoV-19/Japan/PG-83652/2021 | EPI_ISL_3896305 | 2021-09-02      |
| hCoV-19/Japan/PG-83653/2021 | EPI_ISL_3896306 | 2021-09-02      |
| hCoV-19/Japan/PG-83654/2021 | EPI_ISL_3896307 | 2021-09-02      |
| hCoV-19/Japan/PG-83655/2021 | EPI_ISL_3896308 | 2021-09-02      |
| hCoV-19/Japan/PG-83656/2021 | EPI_ISL_3896309 | 2021-09-02      |
| hCoV-19/Japan/PG-83657/2021 | EPI_ISL_3896310 | 2021-09-02      |
| hCoV-19/Japan/PG-83658/2021 | EPI_ISL_3896311 | 2021-09-02      |
| hCoV-19/Japan/PG-83659/2021 | EPI_ISL_3896312 | 2021-09-02      |
| hCoV-19/Japan/PG-83660/2021 | EPI_ISL_3896313 | 2021-09-02      |
| hCoV-19/Japan/PG-83661/2021 | EPI_ISL_3896314 | 2021-09-02      |
| hCoV-19/Japan/PG-83662/2021 | EPI_ISL_3896315 | 2021-09-02      |
| hCoV-19/Japan/PG-83663/2021 | EPI_ISL_3896316 | 2021-09-02      |

| virus_name                  | epiID           | submission_date |
|-----------------------------|-----------------|-----------------|
| hCoV-19/Japan/PG-83664/2021 | EPI_ISL_3896317 | 2021-09-02      |
| hCoV-19/Japan/PG-83665/2021 | EPI_ISL_3896318 | 2021-09-02      |
| hCoV-19/Japan/PG-83666/2021 | EPI_ISL_3896319 | 2021-09-02      |
| hCoV-19/Japan/PG-83667/2021 | EPI_ISL_3896320 | 2021-09-02      |
| hCoV-19/Japan/PG-83668/2021 | EPI_ISL_3896321 | 2021-09-02      |
| hCoV-19/Japan/PG-83669/2021 | EPI_ISL_3896322 | 2021-09-02      |
| hCoV-19/Japan/PG-83670/2021 | EPI_ISL_3896323 | 2021-09-02      |
| hCoV-19/Japan/PG-83671/2021 | EPI_ISL_3896324 | 2021-09-02      |
| hCoV-19/Japan/PG-83672/2021 | EPI_ISL_3896325 | 2021-09-02      |
| hCoV-19/Japan/PG-83673/2021 | EPI_ISL_3896326 | 2021-09-02      |
| hCoV-19/Japan/PG-83674/2021 | EPI_ISL_3896327 | 2021-09-02      |
| hCoV-19/Japan/PG-83675/2021 | EPI_ISL_3896328 | 2021-09-02      |
| hCoV-19/Japan/PG-83676/2021 | EPI_ISL_3896329 | 2021-09-02      |
| hCoV-19/Japan/PG-83677/2021 | EPI_ISL_3896330 | 2021-09-02      |
| hCoV-19/Japan/PG-83678/2021 | EPI_ISL_3896331 | 2021-09-02      |
| hCoV-19/Japan/PG-83679/2021 | EPI_ISL_3896332 | 2021-09-02      |
| hCoV-19/Japan/PG-83680/2021 | EPI_ISL_3896333 | 2021-09-02      |
| hCoV-19/Japan/PG-83681/2021 | EPI_ISL_3896334 | 2021-09-02      |
| hCoV-19/Japan/PG-83682/2021 | EPI_ISL_3896335 | 2021-09-02      |
| hCoV-19/Japan/PG-83683/2021 | EPI_ISL_3896336 | 2021-09-02      |
| hCoV-19/Japan/PG-83684/2021 | EPI_ISL_3896337 | 2021-09-02      |
| hCoV-19/Japan/PG-83685/2021 | EPI_ISL_3896338 | 2021-09-02      |
| hCoV-19/Japan/PG-83686/2021 | EPI_ISL_3896339 | 2021-09-02      |
| hCoV-19/Japan/PG-83687/2021 | EPI_ISL_3896340 | 2021-09-02      |
| hCoV-19/Japan/PG-83688/2021 | EPI_ISL_3896341 | 2021-09-02      |
| hCoV-19/Japan/PG-83689/2021 | EPI_ISL_3896342 | 2021-09-02      |
| hCoV-19/Japan/PG-83690/2021 | EPI_ISL_3896343 | 2021-09-02      |
| hCoV-19/Japan/PG-83691/2021 | EPI_ISL_3896344 | 2021-09-02      |
| hCoV-19/Japan/PG-83692/2021 | EPI_ISL_3896345 | 2021-09-02      |
| hCoV-19/Japan/PG-83693/2021 | EPI_ISL_3896346 | 2021-09-02      |
| hCoV-19/Japan/PG-83694/2021 | EPI_ISL_3896347 | 2021-09-02      |
| hCoV-19/Japan/PG-83695/2021 | EPI_ISL_3896348 | 2021-09-02      |
| hCoV-19/Japan/PG-83696/2021 | EPI_ISL_3896349 | 2021-09-02      |
| hCoV-19/Japan/PG-83697/2021 | EPI_ISL_3896350 | 2021-09-02      |
| hCoV-19/Japan/PG-83698/2021 | EPI_ISL_3896351 | 2021-09-02      |
| hCoV-19/Japan/PG-83699/2021 | EPI_ISL_3896352 | 2021-09-02      |
| hCoV-19/Japan/PG-83700/2021 | EPI_ISL_3896353 | 2021-09-02      |
| hCoV-19/Japan/PG-83701/2021 | EPI_ISL_3896354 | 2021-09-02      |
| hCoV-19/Japan/PG-83702/2021 | EPI_ISL_3896355 | 2021-09-02      |
| hCoV-19/Japan/PG-83703/2021 | EPI_ISL_3896356 | 2021-09-02      |
| hCoV-19/Japan/PG-83704/2021 | EPI_ISL_3896357 | 2021-09-02      |
| hCoV-19/Japan/PG-83705/2021 | EPI_ISL_3896358 | 2021-09-02      |
| hCoV-19/Japan/PG-83706/2021 | EPI_ISL_3896359 | 2021-09-02      |
| hCoV-19/Japan/PG-83707/2021 | EPI_ISL_3896360 | 2021-09-02      |
| hCoV-19/Japan/PG-83708/2021 | EPI_ISL_3896361 | 2021-09-02      |
| hCoV-19/Japan/PG-83709/2021 | EPI_ISL_3896362 | 2021-09-02      |
| hCoV-19/Japan/PG-83710/2021 | EPI_ISL_3896363 | 2021-09-02      |
| hCoV-19/Japan/PG-83711/2021 | EPI_ISL_3896364 | 2021-09-02      |
| hCoV-19/Japan/PG-83712/2021 | EPI_ISL_3896365 | 2021-09-02      |
| hCoV-19/Japan/PG-83713/2021 | EPI_ISL_3896366 | 2021-09-02      |
| hCoV-19/Japan/PG-83714/2021 | EPI_ISL_3896367 | 2021-09-02      |
| hCoV-19/Japan/PG-83715/2021 | EPI_ISL_3896368 | 2021-09-02      |
| hCoV-19/Japan/PG-83716/2021 | EPI_ISL_3896369 | 2021-09-02      |
| hCoV-19/Japan/PG-83717/2021 | EPI_ISL_3896370 | 2021-09-02      |

| virus_name                  | epiID           | submission_date |
|-----------------------------|-----------------|-----------------|
| hCoV-19/Japan/PG-83718/2021 | EPI_ISL_3896371 | 2021-09-02      |
| hCoV-19/Japan/PG-83719/2021 | EPI_ISL_3896372 | 2021-09-02      |
| hCoV-19/Japan/PG-83720/2021 | EPI_ISL_3896373 | 2021-09-02      |
| hCoV-19/Japan/PG-83721/2021 | EPI_ISL_3896374 | 2021-09-02      |
| hCoV-19/Japan/PG-83722/2021 | EPI_ISL_3896375 | 2021-09-02      |
| hCoV-19/Japan/PG-83723/2021 | EPI_ISL_3896376 | 2021-09-02      |
| hCoV-19/Japan/PG-83724/2021 | EPI_ISL_3896377 | 2021-09-02      |
| hCoV-19/Japan/PG-83725/2021 | EPI_ISL_3896378 | 2021-09-02      |
| hCoV-19/Japan/PG-83726/2021 | EPI_ISL_3896379 | 2021-09-02      |
| hCoV-19/Japan/PG-83727/2021 | EPI_ISL_3896380 | 2021-09-02      |
| hCoV-19/Japan/PG-83728/2021 | EPI_ISL_3896381 | 2021-09-02      |
| hCoV-19/Japan/PG-83729/2021 | EPI_ISL_3896382 | 2021-09-02      |
| hCoV-19/Japan/PG-83730/2021 | EPI_ISL_3896383 | 2021-09-02      |
| hCoV-19/Japan/PG-83731/2021 | EPI_ISL_3896384 | 2021-09-02      |
| hCoV-19/Japan/PG-83732/2021 | EPI_ISL_3896385 | 2021-09-02      |
| hCoV-19/Japan/PG-83733/2021 | EPI_ISL_3896386 | 2021-09-02      |
| hCoV-19/Japan/PG-83734/2021 | EPI_ISL_3896387 | 2021-09-02      |
| hCoV-19/Japan/PG-83735/2021 | EPI_ISL_3896388 | 2021-09-02      |
| hCoV-19/Japan/PG-83736/2021 | EPI_ISL_3896389 | 2021-09-02      |
| hCoV-19/Japan/PG-83737/2021 | EPI_ISL_3896390 | 2021-09-02      |
| hCoV-19/Japan/PG-83738/2021 | EPI_ISL_3896391 | 2021-09-02      |
| hCoV-19/Japan/PG-83739/2021 | EPI_ISL_3896392 | 2021-09-02      |
| hCoV-19/Japan/PG-83740/2021 | EPI_ISL_3896393 | 2021-09-02      |
| hCoV-19/Japan/PG-83741/2021 | EPI_ISL_3896394 | 2021-09-02      |
| hCoV-19/Japan/PG-83742/2021 | EPI_ISL_3896395 | 2021-09-02      |
| hCoV-19/Japan/PG-83743/2021 | EPI_ISL_3896396 | 2021-09-02      |
| hCoV-19/Japan/PG-83744/2021 | EPI_ISL_3896397 | 2021-09-02      |
| hCoV-19/Japan/PG-83745/2021 | EPI_ISL_3896398 | 2021-09-02      |
| hCoV-19/Japan/PG-83746/2021 | EPI_ISL_3896399 | 2021-09-02      |
| hCoV-19/Japan/PG-83747/2021 | EPI_ISL_3896400 | 2021-09-02      |
| hCoV-19/Japan/PG-83748/2021 | EPI_ISL_3896401 | 2021-09-02      |
| hCoV-19/Japan/PG-83749/2021 | EPI_ISL_3896402 | 2021-09-02      |
| hCoV-19/Japan/PG-83750/2021 | EPI_ISL_3896403 | 2021-09-02      |
| hCoV-19/Japan/PG-83751/2021 | EPI_ISL_3896404 | 2021-09-02      |
| hCoV-19/Japan/PG-83752/2021 | EPI_ISL_3896405 | 2021-09-02      |
| hCoV-19/Japan/PG-83753/2021 | EPI_ISL_3896406 | 2021-09-02      |
| hCoV-19/Japan/PG-83754/2021 | EPI_ISL_3896407 | 2021-09-02      |
| hCoV-19/Japan/PG-83755/2021 | EPI_ISL_3896408 | 2021-09-02      |
| hCoV-19/Japan/PG-83756/2021 | EPI_ISL_3896409 | 2021-09-02      |
| hCoV-19/Japan/PG-83757/2021 | EPI_ISL_3896410 | 2021-09-02      |
| hCoV-19/Japan/PG-83758/2021 | EPI_ISL_3896411 | 2021-09-02      |
| hCoV-19/Japan/PG-83759/2021 | EPI_ISL_3896412 | 2021-09-02      |
| hCoV-19/Japan/PG-83760/2021 | EPI_ISL_3896413 | 2021-09-02      |
| hCoV-19/Japan/PG-83761/2021 | EPI_ISL_3896414 | 2021-09-02      |
| hCoV-19/Japan/PG-83762/2021 | EPI_ISL_3896415 | 2021-09-02      |
| hCoV-19/Japan/PG-83763/2021 | EPI_ISL_3896416 | 2021-09-02      |
| hCoV-19/Japan/PG-83764/2021 | EPI_ISL_3896417 | 2021-09-02      |
| hCoV-19/Japan/PG-83765/2021 | EPI_ISL_3896418 | 2021-09-02      |
| hCoV-19/Japan/PG-83766/2021 | EPI_ISL_3896419 | 2021-09-02      |
| hCoV-19/Japan/PG-83767/2021 | EPI_ISL_3896420 | 2021-09-02      |
| hCoV-19/Japan/PG-83768/2021 | EPI_ISL_3896421 | 2021-09-02      |
| hCoV-19/Japan/PG-83769/2021 | EPI_ISL_3896422 | 2021-09-02      |
| hCoV-19/Japan/PG-83770/2021 | EPI_ISL_3896423 | 2021-09-02      |
| hCoV-19/Japan/PG-83771/2021 | EPI_ISL_3896424 | 2021-09-02      |



| virus_name                  | epiID           | submission_date |
|-----------------------------|-----------------|-----------------|
| hCoV-19/Japan/PG-83772/2021 | EPI_ISL_3896425 | 2021-09-02      |
| hCoV-19/Japan/PG-83773/2021 | EPI_ISL_3896426 | 2021-09-02      |
| hCoV-19/Japan/PG-83774/2021 | EPI_ISL_3896427 | 2021-09-02      |
| hCoV-19/Japan/PG-83775/2021 | EPI_ISL_3896428 | 2021-09-02      |
| hCoV-19/Japan/PG-83776/2021 | EPI_ISL_3896429 | 2021-09-02      |
| hCoV-19/Japan/PG-83777/2021 | EPI_ISL_3896430 | 2021-09-02      |
| hCoV-19/Japan/PG-83778/2021 | EPI_ISL_3896431 | 2021-09-02      |
| hCoV-19/Japan/PG-83779/2021 | EPI_ISL_3896432 | 2021-09-02      |
| hCoV-19/Japan/PG-83780/2021 | EPI_ISL_3896433 | 2021-09-02      |
| hCoV-19/Japan/PG-83781/2021 | EPI_ISL_3896434 | 2021-09-02      |
| hCoV-19/Japan/PG-83782/2021 | EPI_ISL_3896435 | 2021-09-02      |
| hCoV-19/Japan/PG-83783/2021 | EPI_ISL_3896436 | 2021-09-02      |
| hCoV-19/Japan/PG-83784/2021 | EPI_ISL_3896437 | 2021-09-02      |
| hCoV-19/Japan/PG-83785/2021 | EPI_ISL_3896438 | 2021-09-02      |
| hCoV-19/Japan/PG-83786/2021 | EPI_ISL_3896439 | 2021-09-02      |
| hCoV-19/Japan/PG-83787/2021 | EPI_ISL_3896440 | 2021-09-02      |
| hCoV-19/Japan/PG-83788/2021 | EPI_ISL_3896441 | 2021-09-02      |
| hCoV-19/Japan/PG-83789/2021 | EPI_ISL_3896442 | 2021-09-02      |
| hCoV-19/Japan/PG-83790/2021 | EPI_ISL_3896443 | 2021-09-02      |
| hCoV-19/Japan/PG-83791/2021 | EPI_ISL_3896444 | 2021-09-02      |
| hCoV-19/Japan/PG-83792/2021 | EPI_ISL_3896445 | 2021-09-02      |
| hCoV-19/Japan/PG-83793/2021 | EPI_ISL_3896446 | 2021-09-02      |
| hCoV-19/Japan/PG-83794/2021 | EPI_ISL_3896447 | 2021-09-02      |
| hCoV-19/Japan/PG-83795/2021 | EPI_ISL_3896448 | 2021-09-02      |
| hCoV-19/Japan/PG-83796/2021 | EPI_ISL_3896449 | 2021-09-02      |
| hCoV-19/Japan/PG-83797/2021 | EPI_ISL_3896450 | 2021-09-02      |
| hCoV-19/Japan/PG-83798/2021 | EPI_ISL_3896451 | 2021-09-02      |
| hCoV-19/Japan/PG-83799/2021 | EPI_ISL_3896452 | 2021-09-02      |
| hCoV-19/Japan/PG-83800/2021 | EPI_ISL_3896453 | 2021-09-02      |
| hCoV-19/Japan/PG-83801/2021 | EPI_ISL_3896454 | 2021-09-02      |
| hCoV-19/Japan/PG-83802/2021 | EPI_ISL_3896455 | 2021-09-02      |
| hCoV-19/Japan/PG-83803/2021 | EPI_ISL_3896457 | 2021-09-02      |
| hCoV-19/Japan/PG-83804/2021 | EPI_ISL_3896458 | 2021-09-02      |
| hCoV-19/Japan/PG-83805/2021 | EPI_ISL_3896459 | 2021-09-02      |
| hCoV-19/Japan/PG-83806/2021 | EPI_ISL_3896460 | 2021-09-02      |
| hCoV-19/Japan/PG-83807/2021 | EPI_ISL_3896461 | 2021-09-02      |
| hCoV-19/Japan/PG-83808/2021 | EPI_ISL_3896462 | 2021-09-02      |
| hCoV-19/Japan/PG-83809/2021 | EPI_ISL_3896463 | 2021-09-02      |
| hCoV-19/Japan/PG-83810/2021 | EPI_ISL_3896464 | 2021-09-02      |
| hCoV-19/Japan/PG-83811/2021 | EPI_ISL_3896465 | 2021-09-02      |
| hCoV-19/Japan/PG-83812/2021 | EPI_ISL_3896466 | 2021-09-02      |
| hCoV-19/Japan/PG-83813/2021 | EPI_ISL_3896467 | 2021-09-02      |
| hCoV-19/Japan/PG-83814/2021 | EPI_ISL_3896468 | 2021-09-02      |
| hCoV-19/Japan/PG-83815/2021 | EPI_ISL_3896469 | 2021-09-02      |
| hCoV-19/Japan/PG-83816/2021 | EPI_ISL_3896470 | 2021-09-02      |
| hCoV-19/Japan/PG-83817/2021 | EPI_ISL_3896471 | 2021-09-02      |
| hCoV-19/Japan/PG-83818/2021 | EPI_ISL_3896472 | 2021-09-02      |
| hCoV-19/Japan/PG-83819/2021 | EPI_ISL_3896473 | 2021-09-02      |
| hCoV-19/Japan/PG-83820/2021 | EPI_ISL_3896474 | 2021-09-02      |
| hCoV-19/Japan/PG-83821/2021 | EPI_ISL_3896475 | 2021-09-02      |
| hCoV-19/Japan/PG-83822/2021 | EPI_ISL_3896476 | 2021-09-02      |
| hCoV-19/Japan/PG-83823/2021 | EPI_ISL_3896477 | 2021-09-02      |
| hCoV-19/Japan/PG-83824/2021 | EPI_ISL_3896478 | 2021-09-02      |
| hCoV-19/Japan/PG-83825/2021 | EPI_ISL_3896479 | 2021-09-02      |

| virus_name                  | epiID           | submission_date |
|-----------------------------|-----------------|-----------------|
| hCoV-19/Japan/PG-83826/2021 | EPI_ISL_3896480 | 2021-09-02      |
| hCoV-19/Japan/PG-83827/2021 | EPI_ISL_3896481 | 2021-09-02      |
| hCoV-19/Japan/PG-83828/2021 | EPI_ISL_3896482 | 2021-09-02      |
| hCoV-19/Japan/PG-83829/2021 | EPI_ISL_3896483 | 2021-09-02      |
| hCoV-19/Japan/PG-83830/2021 | EPI_ISL_3896484 | 2021-09-02      |
| hCoV-19/Japan/PG-83831/2021 | EPI_ISL_3896485 | 2021-09-02      |
| hCoV-19/Japan/PG-83832/2021 | EPI_ISL_3896486 | 2021-09-02      |
| hCoV-19/Japan/PG-83833/2021 | EPI_ISL_3896487 | 2021-09-02      |
| hCoV-19/Japan/PG-83834/2021 | EPI_ISL_3896488 | 2021-09-02      |
| hCoV-19/Japan/PG-83835/2021 | EPI_ISL_3896489 | 2021-09-02      |
| hCoV-19/Japan/PG-83836/2021 | EPI_ISL_3896490 | 2021-09-02      |
| hCoV-19/Japan/PG-83837/2021 | EPI_ISL_3896491 | 2021-09-02      |
| hCoV-19/Japan/PG-83838/2021 | EPI_ISL_3896492 | 2021-09-02      |
| hCoV-19/Japan/PG-83839/2021 | EPI_ISL_3896493 | 2021-09-02      |
| hCoV-19/Japan/PG-83840/2021 | EPI_ISL_3896494 | 2021-09-02      |
| hCoV-19/Japan/PG-83841/2021 | EPI_ISL_3896495 | 2021-09-02      |
| hCoV-19/Japan/PG-83842/2021 | EPI_ISL_3896496 | 2021-09-02      |
| hCoV-19/Japan/PG-83843/2021 | EPI_ISL_3896497 | 2021-09-02      |
| hCoV-19/Japan/PG-83844/2021 | EPI_ISL_3896498 | 2021-09-02      |
| hCoV-19/Japan/PG-83845/2021 | EPI_ISL_3896499 | 2021-09-02      |
| hCoV-19/Japan/PG-83846/2021 | EPI_ISL_3896500 | 2021-09-02      |
| hCoV-19/Japan/PG-83847/2021 | EPI_ISL_3896501 | 2021-09-02      |
| hCoV-19/Japan/PG-83848/2021 | EPI_ISL_3896502 | 2021-09-02      |
| hCoV-19/Japan/PG-83849/2021 | EPI_ISL_3896503 | 2021-09-02      |
| hCoV-19/Japan/PG-83850/2021 | EPI_ISL_3896504 | 2021-09-02      |
| hCoV-19/Japan/PG-83851/2021 | EPI_ISL_3896505 | 2021-09-02      |
| hCoV-19/Japan/PG-83852/2021 | EPI_ISL_3896506 | 2021-09-02      |
| hCoV-19/Japan/PG-83853/2021 | EPI_ISL_3896507 | 2021-09-02      |
| hCoV-19/Japan/PG-83854/2021 | EPI_ISL_3896508 | 2021-09-02      |
| hCoV-19/Japan/PG-83855/2021 | EPI_ISL_3896509 | 2021-09-02      |
| hCoV-19/Japan/PG-83856/2021 | EPI_ISL_3896510 | 2021-09-02      |
| hCoV-19/Japan/PG-83857/2021 | EPI_ISL_3896511 | 2021-09-02      |
| hCoV-19/Japan/PG-83858/2021 | EPI_ISL_3896512 | 2021-09-02      |
| hCoV-19/Japan/PG-83859/2021 | EPI_ISL_3896513 | 2021-09-02      |
| hCoV-19/Japan/PG-83860/2021 | EPI_ISL_3896514 | 2021-09-02      |
| hCoV-19/Japan/PG-83861/2021 | EPI_ISL_3896515 | 2021-09-02      |
| hCoV-19/Japan/PG-83862/2021 | EPI_ISL_3896516 | 2021-09-02      |
| hCoV-19/Japan/PG-83863/2021 | EPI_ISL_3896517 | 2021-09-02      |
| hCoV-19/Japan/PG-83864/2021 | EPI_ISL_3896518 | 2021-09-02      |
| hCoV-19/Japan/PG-83865/2021 | EPI_ISL_3896519 | 2021-09-02      |
| hCoV-19/Japan/PG-83866/2021 | EPI_ISL_3896520 | 2021-09-02      |
| hCoV-19/Japan/PG-83867/2021 | EPI_ISL_3896521 | 2021-09-02      |
| hCoV-19/Japan/PG-83868/2021 | EPI_ISL_3896522 | 2021-09-02      |
| hCoV-19/Japan/PG-83869/2021 | EPI_ISL_3896523 | 2021-09-02      |
| hCoV-19/Japan/PG-83870/2021 | EPI_ISL_3896524 | 2021-09-02      |
| hCoV-19/Japan/PG-83871/2021 | EPI_ISL_3896525 | 2021-09-02      |
| hCoV-19/Japan/PG-83872/2021 | EPI_ISL_3896526 | 2021-09-02      |
| hCoV-19/Japan/PG-83873/2021 | EPI_ISL_3896527 | 2021-09-02      |
| hCoV-19/Japan/PG-83874/2021 | EPI_ISL_3896528 | 2021-09-02      |
| hCoV-19/Japan/PG-83875/2021 | EPI_ISL_3896529 | 2021-09-02      |
| hCoV-19/Japan/PG-83876/2021 | EPI_ISL_3896530 | 2021-09-02      |
| hCoV-19/Japan/PG-83877/2021 | EPI_ISL_3896531 | 2021-09-02      |
| hCoV-19/Japan/PG-83878/2021 | EPI_ISL_3896532 | 2021-09-02      |
| hCoV-19/Japan/PG-83879/2021 | EPI_ISL_3896533 | 2021-09-02      |

| virus_name                  | epiID           | submission_date |
|-----------------------------|-----------------|-----------------|
| hCoV-19/Japan/PG-83880/2021 | EPI_ISL_3896534 | 2021-09-02      |
| hCoV-19/Japan/PG-83881/2021 | EPI_ISL_3896535 | 2021-09-02      |
| hCoV-19/Japan/PG-83882/2021 | EPI_ISL_3896536 | 2021-09-02      |
| hCoV-19/Japan/PG-83883/2021 | EPI_ISL_3896537 | 2021-09-02      |
| hCoV-19/Japan/PG-83884/2021 | EPI_ISL_3896538 | 2021-09-02      |
| hCoV-19/Japan/PG-83885/2021 | EPI_ISL_3896539 | 2021-09-02      |
| hCoV-19/Japan/PG-83886/2021 | EPI_ISL_3896540 | 2021-09-02      |
| hCoV-19/Japan/PG-83887/2021 | EPI_ISL_3896541 | 2021-09-02      |
| hCoV-19/Japan/PG-83888/2021 | EPI_ISL_3896542 | 2021-09-02      |
| hCoV-19/Japan/PG-83889/2021 | EPI_ISL_3896543 | 2021-09-02      |
| hCoV-19/Japan/PG-83890/2021 | EPI_ISL_3896544 | 2021-09-02      |
| hCoV-19/Japan/PG-83891/2021 | EPI_ISL_3896545 | 2021-09-02      |
| hCoV-19/Japan/PG-83892/2021 | EPI_ISL_3896546 | 2021-09-02      |
| hCoV-19/Japan/PG-83893/2021 | EPI_ISL_3896547 | 2021-09-02      |
| hCoV-19/Japan/PG-83894/2021 | EPI_ISL_3896548 | 2021-09-02      |
| hCoV-19/Japan/PG-83895/2021 | EPI_ISL_3896549 | 2021-09-02      |
| hCoV-19/Japan/PG-83896/2021 | EPI_ISL_3896550 | 2021-09-02      |
| hCoV-19/Japan/PG-83897/2021 | EPI_ISL_3896551 | 2021-09-02      |
| hCoV-19/Japan/PG-83898/2021 | EPI_ISL_3896552 | 2021-09-02      |
| hCoV-19/Japan/PG-83899/2021 | EPI_ISL_3896553 | 2021-09-02      |
| hCoV-19/Japan/PG-83900/2021 | EPI_ISL_3896554 | 2021-09-02      |
| hCoV-19/Japan/PG-83901/2021 | EPI_ISL_3896555 | 2021-09-02      |
| hCoV-19/Japan/PG-83902/2021 | EPI_ISL_3896556 | 2021-09-02      |
| hCoV-19/Japan/PG-83903/2021 | EPI_ISL_3896557 | 2021-09-02      |
| hCoV-19/Japan/PG-83904/2021 | EPI_ISL_3896558 | 2021-09-02      |
| hCoV-19/Japan/PG-83905/2021 | EPI_ISL_3896559 | 2021-09-02      |
| hCoV-19/Japan/PG-83906/2021 | EPI_ISL_3896560 | 2021-09-02      |
| hCoV-19/Japan/PG-83907/2021 | EPI_ISL_3896561 | 2021-09-02      |
| hCoV-19/Japan/PG-83908/2021 | EPI_ISL_3896562 | 2021-09-02      |
| hCoV-19/Japan/PG-83909/2021 | EPI_ISL_3896563 | 2021-09-02      |
| hCoV-19/Japan/PG-83910/2021 | EPI_ISL_3896564 | 2021-09-02      |
| hCoV-19/Japan/PG-83911/2021 | EPI_ISL_3896565 | 2021-09-02      |
| hCoV-19/Japan/PG-83912/2021 | EPI_ISL_3896566 | 2021-09-02      |
| hCoV-19/Japan/PG-83913/2021 | EPI_ISL_3896567 | 2021-09-02      |
| hCoV-19/Japan/PG-83914/2021 | EPI_ISL_3896568 | 2021-09-02      |
| hCoV-19/Japan/PG-83915/2021 | EPI_ISL_3896569 | 2021-09-02      |
| hCoV-19/Japan/PG-83916/2021 | EPI_ISL_3896570 | 2021-09-02      |
| hCoV-19/Japan/PG-83917/2021 | EPI_ISL_3896571 | 2021-09-02      |
| hCoV-19/Japan/PG-83918/2021 | EPI_ISL_3896572 | 2021-09-02      |
| hCoV-19/Japan/PG-83919/2021 | EPI_ISL_3896573 | 2021-09-02      |
| hCoV-19/Japan/PG-83920/2021 | EPI_ISL_3896574 | 2021-09-02      |
| hCoV-19/Japan/PG-83921/2021 | EPI_ISL_3896575 | 2021-09-02      |
| hCoV-19/Japan/PG-83922/2021 | EPI_ISL_3896576 | 2021-09-02      |
| hCoV-19/Japan/PG-83923/2021 | EPI_ISL_3896577 | 2021-09-02      |
| hCoV-19/Japan/PG-83924/2021 | EPI_ISL_3896578 | 2021-09-02      |
| hCoV-19/Japan/PG-83925/2021 | EPI_ISL_3896579 | 2021-09-02      |
| hCoV-19/Japan/PG-83926/2021 | EPI_ISL_3896580 | 2021-09-02      |
| hCoV-19/Japan/PG-83927/2021 | EPI_ISL_3896581 | 2021-09-02      |
| hCoV-19/Japan/PG-83928/2021 | EPI_ISL_3896582 | 2021-09-02      |
| hCoV-19/Japan/PG-83929/2021 | EPI_ISL_3896583 | 2021-09-02      |
| hCoV-19/Japan/PG-83930/2021 | EPI_ISL_3896584 | 2021-09-02      |
| hCoV-19/Japan/PG-83931/2021 | EPI_ISL_3896585 | 2021-09-02      |
| hCoV-19/Japan/PG-83932/2021 | EPI_ISL_3896586 | 2021-09-02      |
| hCoV-19/Japan/PG-83933/2021 | EPI_ISL_3896587 | 2021-09-02      |

| virus_name                  | epiID           | submission_date |
|-----------------------------|-----------------|-----------------|
| hCoV-19/Japan/PG-83934/2021 | EPI_ISL_3896588 | 2021-09-02      |
| hCoV-19/Japan/PG-83935/2021 | EPI_ISL_3896589 | 2021-09-02      |
| hCoV-19/Japan/PG-83936/2021 | EPI_ISL_3896590 | 2021-09-02      |
| hCoV-19/Japan/PG-83937/2021 | EPI_ISL_3896591 | 2021-09-02      |
| hCoV-19/Japan/PG-83938/2021 | EPI_ISL_3896592 | 2021-09-02      |
| hCoV-19/Japan/PG-83939/2021 | EPI_ISL_3896593 | 2021-09-02      |
| hCoV-19/Japan/PG-83940/2021 | EPI_ISL_3896594 | 2021-09-02      |
| hCoV-19/Japan/PG-83941/2021 | EPI_ISL_3896595 | 2021-09-02      |
| hCoV-19/Japan/PG-83942/2021 | EPI_ISL_3896596 | 2021-09-02      |
| hCoV-19/Japan/PG-83943/2021 | EPI_ISL_3896597 | 2021-09-02      |
| hCoV-19/Japan/PG-83944/2021 | EPI_ISL_3896598 | 2021-09-02      |
| hCoV-19/Japan/PG-83945/2021 | EPI_ISL_3896599 | 2021-09-02      |
| hCoV-19/Japan/PG-83946/2021 | EPI_ISL_3896600 | 2021-09-02      |
| hCoV-19/Japan/PG-83947/2021 | EPI_ISL_3896601 | 2021-09-02      |
| hCoV-19/Japan/PG-83948/2021 | EPI_ISL_3896602 | 2021-09-02      |
| hCoV-19/Japan/PG-83949/2021 | EPI_ISL_3896603 | 2021-09-02      |
| hCoV-19/Japan/PG-83950/2021 | EPI_ISL_3896604 | 2021-09-02      |
| hCoV-19/Japan/PG-83951/2021 | EPI_ISL_3896605 | 2021-09-02      |
| hCoV-19/Japan/PG-83952/2021 | EPI_ISL_3896606 | 2021-09-02      |
| hCoV-19/Japan/PG-83953/2021 | EPI_ISL_3896607 | 2021-09-02      |
| hCoV-19/Japan/PG-83954/2021 | EPI_ISL_3896608 | 2021-09-02      |
| hCoV-19/Japan/PG-83955/2021 | EPI_ISL_3896609 | 2021-09-02      |
| hCoV-19/Japan/PG-83956/2021 | EPI_ISL_3896610 | 2021-09-02      |
| hCoV-19/Japan/PG-83957/2021 | EPI_ISL_3896611 | 2021-09-02      |
| hCoV-19/Japan/PG-83958/2021 | EPI_ISL_3896612 | 2021-09-02      |
| hCoV-19/Japan/PG-83959/2021 | EPI_ISL_3896613 | 2021-09-02      |
| hCoV-19/Japan/PG-83960/2021 | EPI_ISL_3896614 | 2021-09-02      |
| hCoV-19/Japan/PG-83961/2021 | EPI_ISL_3896615 | 2021-09-02      |
| hCoV-19/Japan/PG-83962/2021 | EPI_ISL_3896616 | 2021-09-02      |
| hCoV-19/Japan/PG-83963/2021 | EPI_ISL_3896617 | 2021-09-02      |
| hCoV-19/Japan/PG-83964/2021 | EPI_ISL_3896618 | 2021-09-02      |
| hCoV-19/Japan/PG-83965/2021 | EPI_ISL_3896619 | 2021-09-02      |
| hCoV-19/Japan/PG-83966/2021 | EPI_ISL_3896620 | 2021-09-02      |
| hCoV-19/Japan/PG-83967/2021 | EPI_ISL_3896621 | 2021-09-02      |
| hCoV-19/Japan/PG-83968/2021 | EPI_ISL_3896622 | 2021-09-02      |
| hCoV-19/Japan/PG-83969/2021 | EPI_ISL_3896623 | 2021-09-02      |
| hCoV-19/Japan/PG-83970/2021 | EPI_ISL_3896624 | 2021-09-02      |
| hCoV-19/Japan/PG-83971/2021 | EPI_ISL_3896625 | 2021-09-02      |
| hCoV-19/Japan/PG-83972/2021 | EPI_ISL_3896626 | 2021-09-02      |
| hCoV-19/Japan/PG-83973/2021 | EPI_ISL_3896627 | 2021-09-02      |
| hCoV-19/Japan/PG-83974/2021 | EPI_ISL_3896628 | 2021-09-02      |
| hCoV-19/Japan/PG-83975/2021 | EPI_ISL_3896629 | 2021-09-02      |
| hCoV-19/Japan/PG-83976/2021 | EPI_ISL_3896630 | 2021-09-02      |
| hCoV-19/Japan/PG-83977/2021 | EPI_ISL_3896631 | 2021-09-02      |
| hCoV-19/Japan/PG-83978/2021 | EPI_ISL_3896632 | 2021-09-02      |
| hCoV-19/Japan/PG-83979/2021 | EPI_ISL_3896633 | 2021-09-02      |
| hCoV-19/Japan/PG-83980/2021 | EPI_ISL_3896634 | 2021-09-02      |
| hCoV-19/Japan/PG-83981/2021 | EPI_ISL_3896635 | 2021-09-02      |
| hCoV-19/Japan/PG-83982/2021 | EPI_ISL_3896636 | 2021-09-02      |
| hCoV-19/Japan/PG-83983/2021 | EPI_ISL_3896637 | 2021-09-02      |
| hCoV-19/Japan/PG-83984/2021 | EPI_ISL_3896638 | 2021-09-02      |
| hCoV-19/Japan/PG-83985/2021 | EPI_ISL_3896639 | 2021-09-02      |
| hCoV-19/Japan/PG-83986/2021 | EPI_ISL_3896641 | 2021-09-02      |
| hCoV-19/Japan/PG-83987/2021 | EPI_ISL_3896642 | 2021-09-02      |

| virus_name                  | epiID           | submission_date |
|-----------------------------|-----------------|-----------------|
| hCoV-19/Japan/PG-83988/2021 | EPI_ISL_3896643 | 2021-09-02      |
| hCoV-19/Japan/PG-83989/2021 | EPI_ISL_3896644 | 2021-09-02      |
| hCoV-19/Japan/PG-83990/2021 | EPI_ISL_3896645 | 2021-09-02      |
| hCoV-19/Japan/PG-83991/2021 | EPI_ISL_3896646 | 2021-09-02      |
| hCoV-19/Japan/PG-83992/2021 | EPI_ISL_3896647 | 2021-09-02      |
| hCoV-19/Japan/PG-83993/2021 | EPI_ISL_3896648 | 2021-09-02      |
| hCoV-19/Japan/PG-83994/2021 | EPI_ISL_3896649 | 2021-09-02      |
| hCoV-19/Japan/PG-83995/2021 | EPI_ISL_3896650 | 2021-09-02      |
| hCoV-19/Japan/PG-83996/2021 | EPI_ISL_3896651 | 2021-09-02      |
| hCoV-19/Japan/PG-83997/2021 | EPI_ISL_3896652 | 2021-09-02      |
| hCoV-19/Japan/PG-83998/2021 | EPI_ISL_3896653 | 2021-09-02      |
| hCoV-19/Japan/PG-83999/2021 | EPI_ISL_3896654 | 2021-09-02      |
| hCoV-19/Japan/PG-84000/2021 | EPI_ISL_3896655 | 2021-09-02      |
| hCoV-19/Japan/PG-84001/2021 | EPI_ISL_3896656 | 2021-09-02      |
| hCoV-19/Japan/PG-84002/2021 | EPI_ISL_3896657 | 2021-09-02      |
| hCoV-19/Japan/PG-84003/2021 | EPI_ISL_3896658 | 2021-09-02      |
| hCoV-19/Japan/PG-84004/2021 | EPI_ISL_3896659 | 2021-09-02      |
| hCoV-19/Japan/PG-84005/2021 | EPI_ISL_3896660 | 2021-09-02      |
| hCoV-19/Japan/PG-84006/2021 | EPI_ISL_3896661 | 2021-09-02      |
| hCoV-19/Japan/PG-84007/2021 | EPI_ISL_3896662 | 2021-09-02      |
| hCoV-19/Japan/PG-84008/2021 | EPI_ISL_3896663 | 2021-09-02      |
| hCoV-19/Japan/PG-84009/2021 | EPI_ISL_3896664 | 2021-09-02      |
| hCoV-19/Japan/PG-84010/2021 | EPI_ISL_3896665 | 2021-09-02      |
| hCoV-19/Japan/PG-84011/2021 | EPI_ISL_3896666 | 2021-09-02      |
| hCoV-19/Japan/PG-84012/2021 | EPI_ISL_3896667 | 2021-09-02      |
| hCoV-19/Japan/PG-84013/2021 | EPI_ISL_3896668 | 2021-09-02      |
| hCoV-19/Japan/PG-84014/2021 | EPI_ISL_3896669 | 2021-09-02      |
| hCoV-19/Japan/PG-84015/2021 | EPI_ISL_3896670 | 2021-09-02      |
| hCoV-19/Japan/PG-84016/2021 | EPI_ISL_3896671 | 2021-09-02      |
| hCoV-19/Japan/PG-84017/2021 | EPI_ISL_3896672 | 2021-09-02      |
| hCoV-19/Japan/PG-84018/2021 | EPI_ISL_3896673 | 2021-09-02      |
| hCoV-19/Japan/PG-84019/2021 | EPI_ISL_3896674 | 2021-09-02      |
| hCoV-19/Japan/PG-84020/2021 | EPI_ISL_3896675 | 2021-09-02      |
| hCoV-19/Japan/PG-84021/2021 | EPI_ISL_3896676 | 2021-09-02      |
| hCoV-19/Japan/PG-84022/2021 | EPI_ISL_3896677 | 2021-09-02      |
| hCoV-19/Japan/PG-84023/2021 | EPI_ISL_3896678 | 2021-09-02      |
| hCoV-19/Japan/PG-84024/2021 | EPI_ISL_3896679 | 2021-09-02      |
| hCoV-19/Japan/PG-84025/2021 | EPI_ISL_3896680 | 2021-09-02      |
| hCoV-19/Japan/PG-84026/2021 | EPI_ISL_3896681 | 2021-09-02      |
| hCoV-19/Japan/PG-84027/2021 | EPI_ISL_3896682 | 2021-09-02      |
| hCoV-19/Japan/PG-84028/2021 | EPI_ISL_3896683 | 2021-09-02      |
| hCoV-19/Japan/PG-84029/2021 | EPI_ISL_3896684 | 2021-09-02      |
| hCoV-19/Japan/PG-84030/2021 | EPI_ISL_3896685 | 2021-09-02      |
| hCoV-19/Japan/PG-84031/2021 | EPI_ISL_3896686 | 2021-09-02      |
| hCoV-19/Japan/PG-84032/2021 | EPI_ISL_3896687 | 2021-09-02      |
| hCoV-19/Japan/PG-84033/2021 | EPI_ISL_3896688 | 2021-09-02      |
| hCoV-19/Japan/PG-84034/2021 | EPI_ISL_3896689 | 2021-09-02      |
| hCoV-19/Japan/PG-84035/2021 | EPI_ISL_3896690 | 2021-09-02      |
| hCoV-19/Japan/PG-84036/2021 | EPI_ISL_3896691 | 2021-09-02      |
| hCoV-19/Japan/PG-84037/2021 | EPI_ISL_3896692 | 2021-09-02      |
| hCoV-19/Japan/PG-84038/2021 | EPI_ISL_3896693 | 2021-09-02      |
| hCoV-19/Japan/PG-84039/2021 | EPI_ISL_3896694 | 2021-09-02      |
| hCoV-19/Japan/PG-84040/2021 | EPI_ISL_3896695 | 2021-09-02      |
| hCoV-19/Japan/PG-84041/2021 | EPI_ISL_3896696 | 2021-09-02      |

| virus_name                  | epiID           | submission_date |
|-----------------------------|-----------------|-----------------|
| hCoV-19/Japan/PG-84042/2021 | EPI_ISL_3896697 | 2021-09-02      |
| hCoV-19/Japan/PG-84043/2021 | EPI_ISL_3896698 | 2021-09-02      |
| hCoV-19/Japan/PG-84044/2021 | EPI_ISL_3896699 | 2021-09-02      |
| hCoV-19/Japan/PG-84045/2021 | EPI_ISL_3896700 | 2021-09-02      |
| hCoV-19/Japan/PG-84046/2021 | EPI_ISL_3896701 | 2021-09-02      |
| hCoV-19/Japan/PG-84047/2021 | EPI_ISL_3896702 | 2021-09-02      |
| hCoV-19/Japan/PG-84048/2021 | EPI_ISL_3896703 | 2021-09-02      |
| hCoV-19/Japan/PG-84049/2021 | EPI_ISL_3896704 | 2021-09-02      |
| hCoV-19/Japan/PG-84050/2021 | EPI_ISL_3896705 | 2021-09-02      |
| hCoV-19/Japan/PG-84051/2021 | EPI_ISL_3896706 | 2021-09-02      |
| hCoV-19/Japan/PG-84052/2021 | EPI_ISL_3896707 | 2021-09-02      |
| hCoV-19/Japan/PG-84053/2021 | EPI_ISL_3896708 | 2021-09-02      |
| hCoV-19/Japan/PG-84054/2021 | EPI_ISL_3896709 | 2021-09-02      |
| hCoV-19/Japan/PG-84055/2021 | EPI_ISL_3896710 | 2021-09-02      |
| hCoV-19/Japan/PG-84056/2021 | EPI_ISL_3896711 | 2021-09-02      |
| hCoV-19/Japan/PG-84057/2021 | EPI_ISL_3896712 | 2021-09-02      |
| hCoV-19/Japan/PG-84058/2021 | EPI_ISL_3896713 | 2021-09-02      |
| hCoV-19/Japan/PG-84059/2021 | EPI_ISL_3896714 | 2021-09-02      |
| hCoV-19/Japan/PG-84060/2021 | EPI_ISL_3896715 | 2021-09-02      |
| hCoV-19/Japan/PG-84061/2021 | EPI_ISL_3896716 | 2021-09-02      |
| hCoV-19/Japan/PG-84062/2021 | EPI_ISL_3896717 | 2021-09-02      |
| hCoV-19/Japan/PG-84063/2021 | EPI_ISL_3896718 | 2021-09-02      |
| hCoV-19/Japan/PG-84064/2021 | EPI_ISL_3896719 | 2021-09-02      |
| hCoV-19/Japan/PG-84065/2021 | EPI_ISL_3896720 | 2021-09-02      |
| hCoV-19/Japan/PG-84066/2021 | EPI_ISL_3896721 | 2021-09-02      |
| hCoV-19/Japan/PG-84067/2021 | EPI_ISL_3896722 | 2021-09-02      |
| hCoV-19/Japan/PG-84068/2021 | EPI_ISL_3896723 | 2021-09-02      |
| hCoV-19/Japan/PG-84069/2021 | EPI_ISL_3896724 | 2021-09-02      |
| hCoV-19/Japan/PG-84070/2021 | EPI_ISL_3896725 | 2021-09-02      |
| hCoV-19/Japan/PG-84071/2021 | EPI_ISL_3896726 | 2021-09-02      |
| hCoV-19/Japan/PG-84072/2021 | EPI_ISL_3896727 | 2021-09-02      |
| hCoV-19/Japan/PG-84073/2021 | EPI_ISL_3896728 | 2021-09-02      |
| hCoV-19/Japan/PG-84074/2021 | EPI_ISL_3896729 | 2021-09-02      |
| hCoV-19/Japan/PG-84075/2021 | EPI_ISL_3896730 | 2021-09-02      |
| hCoV-19/Japan/PG-84076/2021 | EPI_ISL_3896731 | 2021-09-02      |
| hCoV-19/Japan/PG-84077/2021 | EPI_ISL_3896732 | 2021-09-02      |
| hCoV-19/Japan/PG-84078/2021 | EPI_ISL_3896733 | 2021-09-02      |
| hCoV-19/Japan/PG-84079/2021 | EPI_ISL_3896734 | 2021-09-02      |
| hCoV-19/Japan/PG-84080/2021 | EPI_ISL_3896735 | 2021-09-02      |
| hCoV-19/Japan/PG-84081/2021 | EPI_ISL_3896736 | 2021-09-02      |
| hCoV-19/Japan/PG-84082/2021 | EPI_ISL_3896737 | 2021-09-02      |
| hCoV-19/Japan/PG-84083/2021 | EPI_ISL_3896738 | 2021-09-02      |
| hCoV-19/Japan/PG-84084/2021 | EPI_ISL_3896739 | 2021-09-02      |
| hCoV-19/Japan/PG-84085/2021 | EPI_ISL_3896740 | 2021-09-02      |
| hCoV-19/Japan/PG-84086/2021 | EPI_ISL_3896741 | 2021-09-02      |
| hCoV-19/Japan/PG-84087/2021 | EPI_ISL_3896742 | 2021-09-02      |
| hCoV-19/Japan/PG-84088/2021 | EPI_ISL_3896743 | 2021-09-02      |
| hCoV-19/Japan/PG-84089/2021 | EPI_ISL_3896744 | 2021-09-02      |
| hCoV-19/Japan/PG-84090/2021 | EPI_ISL_3896745 | 2021-09-02      |
| hCoV-19/Japan/PG-84091/2021 | EPI_ISL_3896746 | 2021-09-02      |
| hCoV-19/Japan/PG-84092/2021 | EPI_ISL_3896747 | 2021-09-02      |
| hCoV-19/Japan/PG-84093/2021 | EPI_ISL_3896748 | 2021-09-02      |
| hCoV-19/Japan/PG-84094/2021 | EPI_ISL_3896749 | 2021-09-02      |
| hCoV-19/Japan/PG-84095/2021 | EPI_ISL_3896750 | 2021-09-02      |

| virus_name                  | epiID           | submission_date |
|-----------------------------|-----------------|-----------------|
| hCoV-19/Japan/PG-84096/2021 | EPI_ISL_3896751 | 2021-09-02      |
| hCoV-19/Japan/PG-84097/2021 | EPI_ISL_3896752 | 2021-09-02      |
| hCoV-19/Japan/PG-84098/2021 | EPI_ISL_3896753 | 2021-09-02      |
| hCoV-19/Japan/PG-84099/2021 | EPI_ISL_3896754 | 2021-09-02      |
| hCoV-19/Japan/PG-84100/2021 | EPI_ISL_3896755 | 2021-09-02      |
| hCoV-19/Japan/PG-84101/2021 | EPI_ISL_3896756 | 2021-09-02      |
| hCoV-19/Japan/PG-84102/2021 | EPI_ISL_3896757 | 2021-09-02      |
| hCoV-19/Japan/PG-84103/2021 | EPI_ISL_3896758 | 2021-09-02      |
| hCoV-19/Japan/PG-84104/2021 | EPI_ISL_3896759 | 2021-09-02      |
| hCoV-19/Japan/PG-84105/2021 | EPI_ISL_3896760 | 2021-09-02      |
| hCoV-19/Japan/PG-84106/2021 | EPI_ISL_3896761 | 2021-09-02      |
| hCoV-19/Japan/PG-84107/2021 | EPI_ISL_3896762 | 2021-09-02      |
| hCoV-19/Japan/PG-84108/2021 | EPI_ISL_3896763 | 2021-09-02      |
| hCoV-19/Japan/PG-84109/2021 | EPI_ISL_3896764 | 2021-09-02      |
| hCoV-19/Japan/PG-84110/2021 | EPI_ISL_3896765 | 2021-09-02      |
| hCoV-19/Japan/PG-84111/2021 | EPI_ISL_3896766 | 2021-09-02      |
| hCoV-19/Japan/PG-84112/2021 | EPI_ISL_3896767 | 2021-09-02      |
| hCoV-19/Japan/PG-84113/2021 | EPI_ISL_3896768 | 2021-09-02      |
| hCoV-19/Japan/PG-84114/2021 | EPI_ISL_3896769 | 2021-09-02      |
| hCoV-19/Japan/PG-84115/2021 | EPI_ISL_3896770 | 2021-09-02      |
| hCoV-19/Japan/PG-84116/2021 | EPI_ISL_3896771 | 2021-09-02      |
| hCoV-19/Japan/PG-84117/2021 | EPI_ISL_3896772 | 2021-09-02      |
| hCoV-19/Japan/PG-84118/2021 | EPI_ISL_3896773 | 2021-09-02      |
| hCoV-19/Japan/PG-84119/2021 | EPI_ISL_3896774 | 2021-09-02      |
| hCoV-19/Japan/PG-84120/2021 | EPI_ISL_3896775 | 2021-09-02      |
| hCoV-19/Japan/PG-84121/2021 | EPI_ISL_3896776 | 2021-09-02      |
| hCoV-19/Japan/PG-84122/2021 | EPI_ISL_3896777 | 2021-09-02      |
| hCoV-19/Japan/PG-84123/2021 | EPI_ISL_3896778 | 2021-09-02      |
| hCoV-19/Japan/PG-84124/2021 | EPI_ISL_3896779 | 2021-09-02      |
| hCoV-19/Japan/PG-84125/2021 | EPI_ISL_3896780 | 2021-09-02      |
| hCoV-19/Japan/PG-84126/2021 | EPI_ISL_3896781 | 2021-09-02      |
| hCoV-19/Japan/PG-84127/2021 | EPI_ISL_3896782 | 2021-09-02      |
| hCoV-19/Japan/PG-84128/2021 | EPI_ISL_3896783 | 2021-09-02      |
| hCoV-19/Japan/PG-84129/2021 | EPI_ISL_3896784 | 2021-09-02      |
| hCoV-19/Japan/PG-84130/2021 | EPI_ISL_3896785 | 2021-09-02      |
| hCoV-19/Japan/PG-84131/2021 | EPI_ISL_3896786 | 2021-09-02      |
| hCoV-19/Japan/PG-84132/2021 | EPI_ISL_3896787 | 2021-09-02      |
| hCoV-19/Japan/PG-84133/2021 | EPI_ISL_3896788 | 2021-09-02      |
| hCoV-19/Japan/PG-84134/2021 | EPI_ISL_3896789 | 2021-09-02      |
| hCoV-19/Japan/PG-84135/2021 | EPI_ISL_3896790 | 2021-09-02      |
| hCoV-19/Japan/PG-84136/2021 | EPI_ISL_3896791 | 2021-09-02      |
| hCoV-19/Japan/PG-84137/2021 | EPI_ISL_3896792 | 2021-09-02      |
| hCoV-19/Japan/PG-84138/2021 | EPI_ISL_3896793 | 2021-09-02      |
| hCoV-19/Japan/PG-84139/2021 | EPI_ISL_3896794 | 2021-09-02      |
| hCoV-19/Japan/PG-84140/2021 | EPI_ISL_3896795 | 2021-09-02      |
| hCoV-19/Japan/PG-84141/2021 | EPI_ISL_3896796 | 2021-09-02      |
| hCoV-19/Japan/PG-84142/2021 | EPI_ISL_3896797 | 2021-09-02      |
| hCoV-19/Japan/PG-84143/2021 | EPI_ISL_3896798 | 2021-09-02      |
| hCoV-19/Japan/PG-84144/2021 | EPI_ISL_3896799 | 2021-09-02      |
| hCoV-19/Japan/PG-84145/2021 | EPI_ISL_3896800 | 2021-09-02      |
| hCoV-19/Japan/PG-84146/2021 | EPI_ISL_3896801 | 2021-09-02      |
| hCoV-19/Japan/PG-84147/2021 | EPI_ISL_3896802 | 2021-09-02      |
| hCoV-19/Japan/PG-84148/2021 | EPI_ISL_3896803 | 2021-09-02      |
| hCoV-19/Japan/PG-84149/2021 | EPI_ISL_3896804 | 2021-09-02      |

| virus_name                  | epiID           | submission_date |
|-----------------------------|-----------------|-----------------|
| hCoV-19/Japan/PG-84150/2021 | EPI_ISL_3896805 | 2021-09-02      |
| hCoV-19/Japan/PG-84151/2021 | EPI_ISL_3896806 | 2021-09-02      |
| hCoV-19/Japan/PG-84152/2021 | EPI_ISL_3896807 | 2021-09-02      |
| hCoV-19/Japan/PG-84153/2021 | EPI_ISL_3896808 | 2021-09-02      |
| hCoV-19/Japan/PG-84154/2021 | EPI_ISL_3896809 | 2021-09-02      |
| hCoV-19/Japan/PG-84155/2021 | EPI_ISL_3896810 | 2021-09-02      |
| hCoV-19/Japan/PG-84156/2021 | EPI_ISL_3896811 | 2021-09-02      |
| hCoV-19/Japan/PG-84157/2021 | EPI_ISL_3896812 | 2021-09-02      |
| hCoV-19/Japan/PG-84158/2021 | EPI_ISL_3896813 | 2021-09-02      |
| hCoV-19/Japan/PG-84159/2021 | EPI_ISL_3896814 | 2021-09-02      |
| hCoV-19/Japan/PG-84160/2021 | EPI_ISL_3896815 | 2021-09-02      |
| hCoV-19/Japan/PG-84161/2021 | EPI_ISL_3896816 | 2021-09-02      |
| hCoV-19/Japan/PG-84162/2021 | EPI_ISL_3896817 | 2021-09-02      |
| hCoV-19/Japan/PG-84163/2021 | EPI_ISL_3896818 | 2021-09-02      |
| hCoV-19/Japan/PG-84164/2021 | EPI_ISL_3896819 | 2021-09-02      |
| hCoV-19/Japan/PG-84165/2021 | EPI_ISL_3896820 | 2021-09-02      |
| hCoV-19/Japan/PG-84166/2021 | EPI_ISL_3896821 | 2021-09-02      |
| hCoV-19/Japan/PG-84167/2021 | EPI_ISL_3896822 | 2021-09-02      |
| hCoV-19/Japan/PG-84168/2021 | EPI_ISL_3896823 | 2021-09-02      |
| hCoV-19/Japan/PG-84169/2021 | EPI_ISL_3896824 | 2021-09-02      |
| hCoV-19/Japan/PG-84170/2021 | EPI_ISL_3896825 | 2021-09-02      |
| hCoV-19/Japan/PG-84171/2021 | EPI_ISL_3896826 | 2021-09-02      |
| hCoV-19/Japan/PG-84172/2021 | EPI_ISL_3896827 | 2021-09-02      |
| hCoV-19/Japan/PG-84173/2021 | EPI_ISL_3896828 | 2021-09-02      |
| hCoV-19/Japan/PG-84174/2021 | EPI_ISL_3896829 | 2021-09-02      |
| hCoV-19/Japan/PG-84175/2021 | EPI_ISL_3896830 | 2021-09-02      |
| hCoV-19/Japan/PG-84176/2021 | EPI_ISL_3896831 | 2021-09-02      |
| hCoV-19/Japan/PG-84177/2021 | EPI_ISL_3896832 | 2021-09-02      |
| hCoV-19/Japan/PG-84178/2021 | EPI_ISL_3896833 | 2021-09-02      |
| hCoV-19/Japan/PG-84179/2021 | EPI_ISL_3896834 | 2021-09-02      |
| hCoV-19/Japan/PG-84180/2021 | EPI_ISL_3896835 | 2021-09-02      |
| hCoV-19/Japan/PG-84181/2021 | EPI_ISL_3896836 | 2021-09-02      |
| hCoV-19/Japan/PG-84182/2021 | EPI_ISL_3896837 | 2021-09-02      |
| hCoV-19/Japan/PG-84183/2021 | EPI_ISL_3896838 | 2021-09-02      |
| hCoV-19/Japan/PG-84184/2021 | EPI_ISL_3896839 | 2021-09-02      |
| hCoV-19/Japan/PG-84185/2021 | EPI_ISL_3896840 | 2021-09-02      |
| hCoV-19/Japan/PG-84186/2021 | EPI_ISL_3896841 | 2021-09-02      |
| hCoV-19/Japan/PG-84187/2021 | EPI_ISL_3896842 | 2021-09-02      |
| hCoV-19/Japan/PG-84188/2021 | EPI_ISL_3896843 | 2021-09-02      |
| hCoV-19/Japan/PG-84189/2021 | EPI_ISL_3896844 | 2021-09-02      |
| hCoV-19/Japan/PG-84190/2021 | EPI_ISL_3896845 | 2021-09-02      |
| hCoV-19/Japan/PG-84191/2021 | EPI_ISL_3896846 | 2021-09-02      |
| hCoV-19/Japan/PG-84192/2021 | EPI_ISL_3896847 | 2021-09-02      |
| hCoV-19/Japan/PG-84193/2021 | EPI_ISL_3896848 | 2021-09-02      |
| hCoV-19/Japan/PG-84194/2021 | EPI_ISL_3896849 | 2021-09-02      |
| hCoV-19/Japan/PG-84195/2021 | EPI_ISL_3896850 | 2021-09-02      |
| hCoV-19/Japan/PG-84196/2021 | EPI_ISL_3896851 | 2021-09-02      |
| hCoV-19/Japan/PG-84197/2021 | EPI_ISL_3896852 | 2021-09-02      |
| hCoV-19/Japan/PG-84198/2021 | EPI_ISL_3896853 | 2021-09-02      |
| hCoV-19/Japan/PG-84199/2021 | EPI_ISL_3896854 | 2021-09-02      |
| hCoV-19/Japan/PG-84200/2021 | EPI_ISL_3896855 | 2021-09-02      |
| hCoV-19/Japan/PG-84201/2021 | EPI_ISL_3896856 | 2021-09-02      |
| hCoV-19/Japan/PG-84202/2021 | EPI_ISL_3896857 | 2021-09-02      |
| hCoV-19/Japan/PG-84203/2021 | EPI_ISL_3896858 | 2021-09-02      |



| virus_name                  | epiID           | submission_date |
|-----------------------------|-----------------|-----------------|
| hCoV-19/Japan/PG-84204/2021 | EPI_ISL_3896859 | 2021-09-02      |
| hCoV-19/Japan/PG-84205/2021 | EPI_ISL_3896860 | 2021-09-02      |
| hCoV-19/Japan/PG-84206/2021 | EPI_ISL_3896861 | 2021-09-02      |
| hCoV-19/Japan/PG-84207/2021 | EPI_ISL_3896862 | 2021-09-02      |
| hCoV-19/Japan/PG-84208/2021 | EPI_ISL_3896863 | 2021-09-02      |
| hCoV-19/Japan/PG-84209/2021 | EPI_ISL_3896864 | 2021-09-02      |
| hCoV-19/Japan/PG-84210/2021 | EPI_ISL_3896865 | 2021-09-02      |
| hCoV-19/Japan/PG-84211/2021 | EPI_ISL_3896866 | 2021-09-02      |
| hCoV-19/Japan/PG-84212/2021 | EPI_ISL_3896867 | 2021-09-02      |
| hCoV-19/Japan/PG-84213/2021 | EPI_ISL_3896868 | 2021-09-02      |
| hCoV-19/Japan/PG-84214/2021 | EPI_ISL_3896869 | 2021-09-02      |
| hCoV-19/Japan/PG-84215/2021 | EPI_ISL_3896870 | 2021-09-02      |
| hCoV-19/Japan/PG-84216/2021 | EPI_ISL_3896871 | 2021-09-02      |
| hCoV-19/Japan/PG-84217/2021 | EPI_ISL_3896872 | 2021-09-02      |
| hCoV-19/Japan/PG-84218/2021 | EPI_ISL_3896873 | 2021-09-02      |
| hCoV-19/Japan/PG-84219/2021 | EPI_ISL_3896874 | 2021-09-02      |
| hCoV-19/Japan/PG-84220/2021 | EPI_ISL_3896875 | 2021-09-02      |
| hCoV-19/Japan/PG-84221/2021 | EPI_ISL_3896876 | 2021-09-02      |
| hCoV-19/Japan/PG-84222/2021 | EPI_ISL_3896877 | 2021-09-02      |
| hCoV-19/Japan/PG-84223/2021 | EPI_ISL_3896878 | 2021-09-02      |
| hCoV-19/Japan/PG-84224/2021 | EPI_ISL_3896879 | 2021-09-02      |
| hCoV-19/Japan/PG-84225/2021 | EPI_ISL_3896880 | 2021-09-02      |
| hCoV-19/Japan/PG-84226/2021 | EPI_ISL_3896881 | 2021-09-02      |
| hCoV-19/Japan/PG-84227/2021 | EPI_ISL_3896882 | 2021-09-02      |
| hCoV-19/Japan/PG-84228/2021 | EPI_ISL_3896883 | 2021-09-02      |
| hCoV-19/Japan/PG-84229/2021 | EPI_ISL_3896884 | 2021-09-02      |
| hCoV-19/Japan/PG-84230/2021 | EPI_ISL_3896885 | 2021-09-02      |
| hCoV-19/Japan/PG-84231/2021 | EPI_ISL_3896886 | 2021-09-02      |
| hCoV-19/Japan/PG-84232/2021 | EPI_ISL_3896887 | 2021-09-02      |
| hCoV-19/Japan/PG-84233/2021 | EPI_ISL_3896888 | 2021-09-02      |
| hCoV-19/Japan/PG-84234/2021 | EPI_ISL_3896889 | 2021-09-02      |
| hCoV-19/Japan/PG-84235/2021 | EPI_ISL_3896890 | 2021-09-02      |
| hCoV-19/Japan/PG-84236/2021 | EPI_ISL_3896891 | 2021-09-02      |
| hCoV-19/Japan/PG-84237/2021 | EPI_ISL_3896892 | 2021-09-02      |
| hCoV-19/Japan/PG-84238/2021 | EPI_ISL_3896893 | 2021-09-02      |
| hCoV-19/Japan/PG-84239/2021 | EPI_ISL_3896894 | 2021-09-02      |
| hCoV-19/Japan/PG-84240/2021 | EPI_ISL_3896895 | 2021-09-02      |
| hCoV-19/Japan/PG-84241/2021 | EPI_ISL_3896896 | 2021-09-02      |
| hCoV-19/Japan/PG-84242/2021 | EPI_ISL_3896897 | 2021-09-02      |
| hCoV-19/Japan/PG-84243/2021 | EPI_ISL_3896898 | 2021-09-02      |
| hCoV-19/Japan/PG-84244/2021 | EPI_ISL_3896899 | 2021-09-02      |
| hCoV-19/Japan/PG-84245/2021 | EPI_ISL_3896900 | 2021-09-02      |
| hCoV-19/Japan/PG-84246/2021 | EPI_ISL_3896901 | 2021-09-02      |
| hCoV-19/Japan/PG-84247/2021 | EPI_ISL_3896902 | 2021-09-02      |
| hCoV-19/Japan/PG-84248/2021 | EPI_ISL_3896903 | 2021-09-02      |
| hCoV-19/Japan/PG-84249/2021 | EPI_ISL_3896904 | 2021-09-02      |
| hCoV-19/Japan/PG-84250/2021 | EPI_ISL_3896905 | 2021-09-02      |
| hCoV-19/Japan/PG-84251/2021 | EPI_ISL_3896906 | 2021-09-02      |
| hCoV-19/Japan/PG-84252/2021 | EPI_ISL_3896907 | 2021-09-02      |
| hCoV-19/Japan/PG-84253/2021 | EPI_ISL_3896908 | 2021-09-02      |
| hCoV-19/Japan/PG-84254/2021 | EPI_ISL_3896909 | 2021-09-02      |
| hCoV-19/Japan/PG-84255/2021 | EPI_ISL_3896910 | 2021-09-02      |
| hCoV-19/Japan/PG-84256/2021 | EPI_ISL_3896911 | 2021-09-02      |
| hCoV-19/Japan/PG-84257/2021 | EPI_ISL_3896912 | 2021-09-02      |

| virus_name                  | epiID           | submission_date |
|-----------------------------|-----------------|-----------------|
| hCoV-19/Japan/PG-84258/2021 | EPI_ISL_3896913 | 2021-09-02      |
| hCoV-19/Japan/PG-84259/2021 | EPI_ISL_3896914 | 2021-09-02      |
| hCoV-19/Japan/PG-84260/2021 | EPI_ISL_3896915 | 2021-09-02      |
| hCoV-19/Japan/PG-84261/2021 | EPI_ISL_3896916 | 2021-09-02      |
| hCoV-19/Japan/PG-84262/2021 | EPI_ISL_3896917 | 2021-09-02      |
| hCoV-19/Japan/PG-84263/2021 | EPI_ISL_3896918 | 2021-09-02      |
| hCoV-19/Japan/PG-84264/2021 | EPI_ISL_3896919 | 2021-09-02      |
| hCoV-19/Japan/PG-84265/2021 | EPI_ISL_3896920 | 2021-09-02      |
| hCoV-19/Japan/PG-84266/2021 | EPI_ISL_3896921 | 2021-09-02      |
| hCoV-19/Japan/PG-84267/2021 | EPI_ISL_3896922 | 2021-09-02      |
| hCoV-19/Japan/PG-84268/2021 | EPI_ISL_3896923 | 2021-09-02      |
| hCoV-19/Japan/PG-84269/2021 | EPI_ISL_3896924 | 2021-09-02      |
| hCoV-19/Japan/PG-84270/2021 | EPI_ISL_3896925 | 2021-09-02      |
| hCoV-19/Japan/PG-84271/2021 | EPI_ISL_3896926 | 2021-09-02      |
| hCoV-19/Japan/PG-84272/2021 | EPI_ISL_3896927 | 2021-09-02      |
| hCoV-19/Japan/PG-84273/2021 | EPI_ISL_3896928 | 2021-09-02      |
| hCoV-19/Japan/PG-84274/2021 | EPI_ISL_3896929 | 2021-09-02      |
| hCoV-19/Japan/PG-84275/2021 | EPI_ISL_3896930 | 2021-09-02      |
| hCoV-19/Japan/PG-84276/2021 | EPI_ISL_3896931 | 2021-09-02      |
| hCoV-19/Japan/PG-84277/2021 | EPI_ISL_3896932 | 2021-09-02      |
| hCoV-19/Japan/PG-84278/2021 | EPI_ISL_3896933 | 2021-09-02      |
| hCoV-19/Japan/PG-84279/2021 | EPI_ISL_3896934 | 2021-09-02      |
| hCoV-19/Japan/PG-84280/2021 | EPI_ISL_3896935 | 2021-09-02      |
| hCoV-19/Japan/PG-84281/2021 | EPI_ISL_3896936 | 2021-09-02      |
| hCoV-19/Japan/PG-84282/2021 | EPI_ISL_3896937 | 2021-09-02      |
| hCoV-19/Japan/PG-84283/2021 | EPI_ISL_3896938 | 2021-09-02      |
| hCoV-19/Japan/PG-84284/2021 | EPI_ISL_3896939 | 2021-09-02      |
| hCoV-19/Japan/PG-84285/2021 | EPI_ISL_3896940 | 2021-09-02      |
| hCoV-19/Japan/PG-84286/2021 | EPI_ISL_3896941 | 2021-09-02      |
| hCoV-19/Japan/PG-84287/2021 | EPI_ISL_3896942 | 2021-09-02      |
| hCoV-19/Japan/PG-84288/2021 | EPI_ISL_3896943 | 2021-09-02      |
| hCoV-19/Japan/PG-84289/2021 | EPI_ISL_3896944 | 2021-09-02      |
| hCoV-19/Japan/PG-84290/2021 | EPI_ISL_3896945 | 2021-09-02      |
| hCoV-19/Japan/PG-84291/2021 | EPI_ISL_3896946 | 2021-09-02      |
| hCoV-19/Japan/PG-84292/2021 | EPI_ISL_3896947 | 2021-09-02      |
| hCoV-19/Japan/PG-84293/2021 | EPI_ISL_3896948 | 2021-09-02      |
| hCoV-19/Japan/PG-84294/2021 | EPI_ISL_3896949 | 2021-09-02      |
| hCoV-19/Japan/PG-84295/2021 | EPI_ISL_3896950 | 2021-09-02      |
| hCoV-19/Japan/PG-84296/2021 | EPI_ISL_3896951 | 2021-09-02      |
| hCoV-19/Japan/PG-84297/2021 | EPI_ISL_3896952 | 2021-09-02      |
| hCoV-19/Japan/PG-84298/2021 | EPI_ISL_3896953 | 2021-09-02      |
| hCoV-19/Japan/PG-84299/2021 | EPI_ISL_3896954 | 2021-09-02      |
| hCoV-19/Japan/PG-84300/2021 | EPI_ISL_3896955 | 2021-09-02      |
| hCoV-19/Japan/PG-84301/2021 | EPI_ISL_3896956 | 2021-09-02      |
| hCoV-19/Japan/PG-84302/2021 | EPI_ISL_3896957 | 2021-09-02      |
| hCoV-19/Japan/PG-84303/2021 | EPI_ISL_3896958 | 2021-09-02      |
| hCoV-19/Japan/PG-84304/2021 | EPI_ISL_3896959 | 2021-09-02      |
| hCoV-19/Japan/PG-84305/2021 | EPI_ISL_3896960 | 2021-09-02      |
| hCoV-19/Japan/PG-84306/2021 | EPI_ISL_3896961 | 2021-09-02      |
| hCoV-19/Japan/PG-84307/2021 | EPI_ISL_3896962 | 2021-09-02      |
| hCoV-19/Japan/PG-84308/2021 | EPI_ISL_3896963 | 2021-09-02      |
| hCoV-19/Japan/PG-84309/2021 | EPI_ISL_3896964 | 2021-09-02      |
| hCoV-19/Japan/PG-84310/2021 | EPI_ISL_3896965 | 2021-09-02      |
| hCoV-19/Japan/PG-84311/2021 | EPI_ISL_3896966 | 2021-09-02      |

| virus_name                  | epiID           | submission_date |
|-----------------------------|-----------------|-----------------|
| hCoV-19/Japan/PG-84312/2021 | EPI_ISL_3896967 | 2021-09-02      |
| hCoV-19/Japan/PG-84313/2021 | EPI_ISL_3896968 | 2021-09-02      |
| hCoV-19/Japan/PG-84314/2021 | EPI_ISL_3896969 | 2021-09-02      |
| hCoV-19/Japan/PG-84315/2021 | EPI_ISL_3896970 | 2021-09-02      |
| hCoV-19/Japan/PG-84316/2021 | EPI_ISL_3896971 | 2021-09-02      |
| hCoV-19/Japan/PG-84317/2021 | EPI_ISL_3896972 | 2021-09-02      |
| hCoV-19/Japan/PG-84318/2021 | EPI_ISL_3896973 | 2021-09-02      |
| hCoV-19/Japan/PG-84319/2021 | EPI_ISL_3896974 | 2021-09-02      |
| hCoV-19/Japan/PG-84320/2021 | EPI_ISL_3896975 | 2021-09-02      |
| hCoV-19/Japan/PG-84321/2021 | EPI_ISL_3896976 | 2021-09-02      |
| hCoV-19/Japan/PG-84322/2021 | EPI_ISL_3896977 | 2021-09-02      |
| hCoV-19/Japan/PG-84323/2021 | EPI_ISL_3896978 | 2021-09-02      |
| hCoV-19/Japan/PG-84324/2021 | EPI_ISL_3896979 | 2021-09-02      |
| hCoV-19/Japan/PG-84325/2021 | EPI_ISL_3896980 | 2021-09-02      |
| hCoV-19/Japan/PG-84326/2021 | EPI_ISL_3896981 | 2021-09-02      |
| hCoV-19/Japan/PG-84327/2021 | EPI_ISL_3896982 | 2021-09-02      |
| hCoV-19/Japan/PG-84328/2021 | EPI_ISL_3896983 | 2021-09-02      |
| hCoV-19/Japan/PG-84329/2021 | EPI_ISL_3896984 | 2021-09-02      |
| hCoV-19/Japan/PG-84330/2021 | EPI_ISL_3896985 | 2021-09-02      |
| hCoV-19/Japan/PG-84331/2021 | EPI_ISL_3896986 | 2021-09-02      |
| hCoV-19/Japan/PG-84332/2021 | EPI_ISL_3896987 | 2021-09-02      |
| hCoV-19/Japan/PG-84333/2021 | EPI_ISL_3896988 | 2021-09-02      |
| hCoV-19/Japan/PG-84334/2021 | EPI_ISL_3896989 | 2021-09-02      |
| hCoV-19/Japan/PG-84335/2021 | EPI_ISL_3896990 | 2021-09-02      |
| hCoV-19/Japan/PG-84336/2021 | EPI_ISL_3896991 | 2021-09-02      |
| hCoV-19/Japan/PG-84337/2021 | EPI_ISL_3896992 | 2021-09-02      |
| hCoV-19/Japan/PG-84338/2021 | EPI_ISL_3896993 | 2021-09-02      |
| hCoV-19/Japan/PG-84339/2021 | EPI_ISL_3896994 | 2021-09-02      |
| hCoV-19/Japan/PG-84340/2021 | EPI_ISL_3896995 | 2021-09-02      |
| hCoV-19/Japan/PG-84341/2021 | EPI_ISL_3896996 | 2021-09-02      |
| hCoV-19/Japan/PG-84342/2021 | EPI_ISL_3896997 | 2021-09-02      |
| hCoV-19/Japan/PG-84343/2021 | EPI_ISL_3896998 | 2021-09-02      |
| hCoV-19/Japan/PG-84344/2021 | EPI_ISL_3896999 | 2021-09-02      |
| hCoV-19/Japan/PG-84345/2021 | EPI_ISL_3897000 | 2021-09-02      |
| hCoV-19/Japan/PG-84346/2021 | EPI_ISL_3897001 | 2021-09-02      |
| hCoV-19/Japan/PG-84347/2021 | EPI_ISL_3897002 | 2021-09-02      |
| hCoV-19/Japan/PG-84348/2021 | EPI_ISL_3897004 | 2021-09-02      |
| hCoV-19/Japan/PG-84349/2021 | EPI_ISL_3897005 | 2021-09-02      |
| hCoV-19/Japan/PG-84350/2021 | EPI_ISL_3897006 | 2021-09-02      |
| hCoV-19/Japan/PG-84351/2021 | EPI_ISL_3897007 | 2021-09-02      |
| hCoV-19/Japan/PG-84352/2021 | EPI_ISL_3897008 | 2021-09-02      |
| hCoV-19/Japan/PG-84353/2021 | EPI_ISL_3897009 | 2021-09-02      |
| hCoV-19/Japan/PG-84354/2021 | EPI_ISL_3897010 | 2021-09-02      |
| hCoV-19/Japan/PG-84355/2021 | EPI_ISL_3897011 | 2021-09-02      |
| hCoV-19/Japan/PG-84356/2021 | EPI_ISL_3897012 | 2021-09-02      |
| hCoV-19/Japan/PG-84357/2021 | EPI_ISL_3897013 | 2021-09-02      |
| hCoV-19/Japan/PG-84358/2021 | EPI_ISL_3897014 | 2021-09-02      |
| hCoV-19/Japan/PG-84359/2021 | EPI_ISL_3897015 | 2021-09-02      |
| hCoV-19/Japan/PG-84360/2021 | EPI_ISL_3897016 | 2021-09-02      |
| hCoV-19/Japan/PG-84361/2021 | EPI_ISL_3897017 | 2021-09-02      |
| hCoV-19/Japan/PG-84362/2021 | EPI_ISL_3897018 | 2021-09-02      |
| hCoV-19/Japan/PG-84363/2021 | EPI_ISL_3897019 | 2021-09-02      |
| hCoV-19/Japan/PG-84364/2021 | EPI_ISL_3897020 | 2021-09-02      |
| hCoV-19/Japan/PG-84365/2021 | EPI_ISL_3897021 | 2021-09-02      |

| virus_name                  | epiID           | submission_date |
|-----------------------------|-----------------|-----------------|
| hCoV-19/Japan/PG-84366/2021 | EPI_ISL_3897022 | 2021-09-02      |
| hCoV-19/Japan/PG-84367/2021 | EPI_ISL_3897023 | 2021-09-02      |
| hCoV-19/Japan/PG-84368/2021 | EPI_ISL_3897024 | 2021-09-02      |
| hCoV-19/Japan/PG-84369/2021 | EPI_ISL_3897025 | 2021-09-02      |
| hCoV-19/Japan/PG-84370/2021 | EPI_ISL_3897026 | 2021-09-02      |
| hCoV-19/Japan/PG-84371/2021 | EPI_ISL_3897027 | 2021-09-02      |
| hCoV-19/Japan/PG-84372/2021 | EPI_ISL_3897028 | 2021-09-02      |
| hCoV-19/Japan/PG-84373/2021 | EPI_ISL_3897029 | 2021-09-02      |
| hCoV-19/Japan/PG-84374/2021 | EPI_ISL_3897030 | 2021-09-02      |
| hCoV-19/Japan/PG-84375/2021 | EPI_ISL_3897031 | 2021-09-02      |
| hCoV-19/Japan/PG-84376/2021 | EPI_ISL_3897032 | 2021-09-02      |
| hCoV-19/Japan/PG-84377/2021 | EPI_ISL_3897033 | 2021-09-02      |
| hCoV-19/Japan/PG-84378/2021 | EPI_ISL_3897034 | 2021-09-02      |
| hCoV-19/Japan/PG-84379/2021 | EPI_ISL_3897035 | 2021-09-02      |
| hCoV-19/Japan/PG-84380/2021 | EPI_ISL_3897036 | 2021-09-02      |
| hCoV-19/Japan/PG-84381/2021 | EPI_ISL_3897037 | 2021-09-02      |
| hCoV-19/Japan/PG-84382/2021 | EPI_ISL_3897038 | 2021-09-02      |
| hCoV-19/Japan/PG-84383/2021 | EPI_ISL_3897039 | 2021-09-02      |
| hCoV-19/Japan/PG-84384/2021 | EPI_ISL_3897040 | 2021-09-02      |
| hCoV-19/Japan/PG-84385/2021 | EPI_ISL_3897041 | 2021-09-02      |
| hCoV-19/Japan/PG-84386/2021 | EPI_ISL_3897042 | 2021-09-02      |
| hCoV-19/Japan/PG-84387/2021 | EPI_ISL_3897043 | 2021-09-02      |
| hCoV-19/Japan/PG-84388/2021 | EPI_ISL_3897044 | 2021-09-02      |
| hCoV-19/Japan/PG-84389/2021 | EPI_ISL_3897045 | 2021-09-02      |
| hCoV-19/Japan/PG-84390/2021 | EPI_ISL_3897046 | 2021-09-02      |
| hCoV-19/Japan/PG-84391/2021 | EPI_ISL_3897047 | 2021-09-02      |
| hCoV-19/Japan/PG-84392/2021 | EPI_ISL_3897048 | 2021-09-02      |
| hCoV-19/Japan/PG-84393/2021 | EPI_ISL_3897049 | 2021-09-02      |
| hCoV-19/Japan/PG-84394/2021 | EPI_ISL_3897050 | 2021-09-02      |
| hCoV-19/Japan/PG-84395/2021 | EPI_ISL_3897051 | 2021-09-02      |
| hCoV-19/Japan/PG-84396/2021 | EPI_ISL_3897052 | 2021-09-02      |
| hCoV-19/Japan/PG-84397/2021 | EPI_ISL_3897053 | 2021-09-02      |
| hCoV-19/Japan/PG-84398/2021 | EPI_ISL_3897054 | 2021-09-02      |
| hCoV-19/Japan/PG-84399/2021 | EPI_ISL_3897055 | 2021-09-02      |
| hCoV-19/Japan/PG-84400/2021 | EPI_ISL_3897056 | 2021-09-02      |
| hCoV-19/Japan/PG-84401/2021 | EPI_ISL_3897057 | 2021-09-02      |
| hCoV-19/Japan/PG-84402/2021 | EPI_ISL_3897058 | 2021-09-02      |
| hCoV-19/Japan/PG-84403/2021 | EPI_ISL_3897059 | 2021-09-02      |
| hCoV-19/Japan/PG-84404/2021 | EPI_ISL_3897060 | 2021-09-02      |
| hCoV-19/Japan/PG-84405/2021 | EPI_ISL_3897061 | 2021-09-02      |
| hCoV-19/Japan/PG-84406/2021 | EPI_ISL_3897062 | 2021-09-02      |
| hCoV-19/Japan/PG-84407/2021 | EPI_ISL_3897063 | 2021-09-02      |
| hCoV-19/Japan/PG-84408/2021 | EPI_ISL_3897064 | 2021-09-02      |
| hCoV-19/Japan/PG-84409/2021 | EPI_ISL_3897065 | 2021-09-02      |
| hCoV-19/Japan/PG-84410/2021 | EPI_ISL_3897066 | 2021-09-02      |
| hCoV-19/Japan/PG-84411/2021 | EPI_ISL_3897067 | 2021-09-02      |
| hCoV-19/Japan/PG-84412/2021 | EPI_ISL_3897068 | 2021-09-02      |
| hCoV-19/Japan/PG-84413/2021 | EPI_ISL_3897069 | 2021-09-02      |
| hCoV-19/Japan/PG-84414/2021 | EPI_ISL_3897070 | 2021-09-02      |
| hCoV-19/Japan/PG-84415/2021 | EPI_ISL_3897071 | 2021-09-02      |
| hCoV-19/Japan/PG-84416/2021 | EPI_ISL_3897072 | 2021-09-02      |
| hCoV-19/Japan/PG-84417/2021 | EPI_ISL_3897073 | 2021-09-02      |
| hCoV-19/Japan/PG-84418/2021 | EPI_ISL_3897074 | 2021-09-02      |
| hCoV-19/Japan/PG-84419/2021 | EPI_ISL_3897075 | 2021-09-02      |

| virus_name                  | epiID           | submission_date |
|-----------------------------|-----------------|-----------------|
| hCoV-19/Japan/PG-84420/2021 | EPI_ISL_3897076 | 2021-09-02      |
| hCoV-19/Japan/PG-84421/2021 | EPI_ISL_3897077 | 2021-09-02      |
| hCoV-19/Japan/PG-84422/2021 | EPI_ISL_3897078 | 2021-09-02      |
| hCoV-19/Japan/PG-84423/2021 | EPI_ISL_3897079 | 2021-09-02      |
| hCoV-19/Japan/PG-84424/2021 | EPI_ISL_3897080 | 2021-09-02      |
| hCoV-19/Japan/PG-84425/2021 | EPI_ISL_3897081 | 2021-09-02      |
| hCoV-19/Japan/PG-84426/2021 | EPI_ISL_3897082 | 2021-09-02      |
| hCoV-19/Japan/PG-84427/2021 | EPI_ISL_3897083 | 2021-09-02      |
| hCoV-19/Japan/PG-84428/2021 | EPI_ISL_3897084 | 2021-09-02      |
| hCoV-19/Japan/PG-84429/2021 | EPI_ISL_3897085 | 2021-09-02      |
| hCoV-19/Japan/PG-84430/2021 | EPI_ISL_3897086 | 2021-09-02      |
| hCoV-19/Japan/PG-84431/2021 | EPI_ISL_3897087 | 2021-09-02      |
| hCoV-19/Japan/PG-84432/2021 | EPI_ISL_3897088 | 2021-09-02      |
| hCoV-19/Japan/PG-84433/2021 | EPI_ISL_3897089 | 2021-09-02      |
| hCoV-19/Japan/PG-84434/2021 | EPI_ISL_3897090 | 2021-09-02      |
| hCoV-19/Japan/PG-84435/2021 | EPI_ISL_3897091 | 2021-09-02      |
| hCoV-19/Japan/PG-84436/2021 | EPI_ISL_3897092 | 2021-09-02      |
| hCoV-19/Japan/PG-84437/2021 | EPI_ISL_3897093 | 2021-09-02      |
| hCoV-19/Japan/PG-84438/2021 | EPI_ISL_3897094 | 2021-09-02      |
| hCoV-19/Japan/PG-84439/2021 | EPI_ISL_3897095 | 2021-09-02      |
| hCoV-19/Japan/PG-84440/2021 | EPI_ISL_3897096 | 2021-09-02      |
| hCoV-19/Japan/PG-84441/2021 | EPI_ISL_3897097 | 2021-09-02      |
| hCoV-19/Japan/PG-84442/2021 | EPI_ISL_3897098 | 2021-09-02      |
| hCoV-19/Japan/PG-84443/2021 | EPI_ISL_3897099 | 2021-09-02      |
| hCoV-19/Japan/PG-84444/2021 | EPI_ISL_3897100 | 2021-09-02      |
| hCoV-19/Japan/PG-84445/2021 | EPI_ISL_3897101 | 2021-09-02      |
| hCoV-19/Japan/PG-84446/2021 | EPI_ISL_3897102 | 2021-09-02      |
| hCoV-19/Japan/PG-84447/2021 | EPI_ISL_3897103 | 2021-09-02      |
| hCoV-19/Japan/PG-84448/2021 | EPI_ISL_3897104 | 2021-09-02      |
| hCoV-19/Japan/PG-84449/2021 | EPI_ISL_3897105 | 2021-09-02      |
| hCoV-19/Japan/PG-84450/2021 | EPI_ISL_3897106 | 2021-09-02      |
| hCoV-19/Japan/PG-84451/2021 | EPI_ISL_3897107 | 2021-09-02      |
| hCoV-19/Japan/PG-84452/2021 | EPI_ISL_3897108 | 2021-09-02      |
| hCoV-19/Japan/PG-84453/2021 | EPI_ISL_3897109 | 2021-09-02      |
| hCoV-19/Japan/PG-84454/2021 | EPI_ISL_3897110 | 2021-09-02      |
| hCoV-19/Japan/PG-84455/2021 | EPI_ISL_3897111 | 2021-09-02      |
| hCoV-19/Japan/PG-84456/2021 | EPI_ISL_3897112 | 2021-09-02      |
| hCoV-19/Japan/PG-84457/2021 | EPI_ISL_3897113 | 2021-09-02      |
| hCoV-19/Japan/PG-84458/2021 | EPI_ISL_3897114 | 2021-09-02      |
| hCoV-19/Japan/PG-84459/2021 | EPI_ISL_3897115 | 2021-09-02      |
| hCoV-19/Japan/PG-84460/2021 | EPI_ISL_3897116 | 2021-09-02      |
| hCoV-19/Japan/PG-84461/2021 | EPI_ISL_3897117 | 2021-09-02      |
| hCoV-19/Japan/PG-84462/2021 | EPI_ISL_3897118 | 2021-09-02      |
| hCoV-19/Japan/PG-84463/2021 | EPI_ISL_3897119 | 2021-09-02      |
| hCoV-19/Japan/PG-84464/2021 | EPI_ISL_3897120 | 2021-09-02      |
| hCoV-19/Japan/PG-84465/2021 | EPI_ISL_3897121 | 2021-09-02      |
| hCoV-19/Japan/PG-84466/2021 | EPI_ISL_3897122 | 2021-09-02      |
| hCoV-19/Japan/PG-84467/2021 | EPI_ISL_3897123 | 2021-09-02      |
| hCoV-19/Japan/PG-84468/2021 | EPI_ISL_3897124 | 2021-09-02      |
| hCoV-19/Japan/PG-84469/2021 | EPI_ISL_3897125 | 2021-09-02      |
| hCoV-19/Japan/PG-84470/2021 | EPI_ISL_3897126 | 2021-09-02      |
| hCoV-19/Japan/PG-84471/2021 | EPI_ISL_3897127 | 2021-09-02      |
| hCoV-19/Japan/PG-84472/2021 | EPI_ISL_3897128 | 2021-09-02      |
| hCoV-19/Japan/PG-84473/2021 | EPI_ISL_3897129 | 2021-09-02      |

| virus_name                  | epiID           | submission_date |
|-----------------------------|-----------------|-----------------|
| hCoV-19/Japan/PG-84474/2021 | EPI_ISL_3897130 | 2021-09-02      |
| hCoV-19/Japan/PG-84475/2021 | EPI_ISL_3897131 | 2021-09-02      |
| hCoV-19/Japan/PG-84476/2021 | EPI_ISL_3897132 | 2021-09-02      |
| hCoV-19/Japan/PG-84477/2021 | EPI_ISL_3897133 | 2021-09-02      |
| hCoV-19/Japan/PG-84478/2021 | EPI_ISL_3897134 | 2021-09-02      |
| hCoV-19/Japan/PG-84479/2021 | EPI_ISL_3897135 | 2021-09-02      |
| hCoV-19/Japan/PG-84480/2021 | EPI_ISL_3897136 | 2021-09-02      |
| hCoV-19/Japan/PG-84481/2021 | EPI_ISL_3897137 | 2021-09-02      |
| hCoV-19/Japan/PG-84482/2021 | EPI_ISL_3897138 | 2021-09-02      |
| hCoV-19/Japan/PG-84483/2021 | EPI_ISL_3897139 | 2021-09-02      |
| hCoV-19/Japan/PG-84484/2021 | EPI_ISL_3897140 | 2021-09-02      |
| hCoV-19/Japan/PG-84485/2021 | EPI_ISL_3897141 | 2021-09-02      |
| hCoV-19/Japan/PG-84486/2021 | EPI_ISL_3897142 | 2021-09-02      |
| hCoV-19/Japan/PG-84487/2021 | EPI_ISL_3897143 | 2021-09-02      |
| hCoV-19/Japan/PG-84488/2021 | EPI_ISL_3897144 | 2021-09-02      |
| hCoV-19/Japan/PG-84489/2021 | EPI_ISL_3897145 | 2021-09-02      |
| hCoV-19/Japan/PG-84490/2021 | EPI_ISL_3897146 | 2021-09-02      |
| hCoV-19/Japan/PG-84491/2021 | EPI_ISL_3897147 | 2021-09-02      |
| hCoV-19/Japan/PG-84492/2021 | EPI_ISL_3897148 | 2021-09-02      |
| hCoV-19/Japan/PG-84493/2021 | EPI_ISL_3897149 | 2021-09-02      |
| hCoV-19/Japan/PG-84494/2021 | EPI_ISL_3897150 | 2021-09-02      |
| hCoV-19/Japan/PG-84495/2021 | EPI_ISL_3897151 | 2021-09-02      |
| hCoV-19/Japan/PG-84496/2021 | EPI_ISL_3897152 | 2021-09-02      |
| hCoV-19/Japan/PG-84497/2021 | EPI_ISL_3897153 | 2021-09-02      |
| hCoV-19/Japan/PG-84498/2021 | EPI_ISL_3897154 | 2021-09-02      |
| hCoV-19/Japan/PG-84499/2021 | EPI_ISL_3897155 | 2021-09-02      |
| hCoV-19/Japan/PG-84500/2021 | EPI_ISL_3897156 | 2021-09-02      |
| hCoV-19/Japan/PG-84501/2021 | EPI_ISL_3897157 | 2021-09-02      |
| hCoV-19/Japan/PG-84502/2021 | EPI_ISL_3897158 | 2021-09-02      |
| hCoV-19/Japan/PG-84503/2021 | EPI_ISL_3897159 | 2021-09-02      |
| hCoV-19/Japan/PG-84504/2021 | EPI_ISL_3897160 | 2021-09-02      |
| hCoV-19/Japan/PG-84505/2021 | EPI_ISL_3897161 | 2021-09-02      |
| hCoV-19/Japan/PG-84506/2021 | EPI_ISL_3897162 | 2021-09-02      |
| hCoV-19/Japan/PG-84507/2021 | EPI_ISL_3897163 | 2021-09-02      |
| hCoV-19/Japan/PG-84508/2021 | EPI_ISL_3897164 | 2021-09-02      |
| hCoV-19/Japan/PG-84509/2021 | EPI_ISL_3897165 | 2021-09-02      |
| hCoV-19/Japan/PG-84510/2021 | EPI_ISL_3897166 | 2021-09-02      |
| hCoV-19/Japan/PG-84511/2021 | EPI_ISL_3897167 | 2021-09-02      |
| hCoV-19/Japan/PG-84512/2021 | EPI_ISL_3897168 | 2021-09-02      |
| hCoV-19/Japan/PG-84513/2021 | EPI_ISL_3897169 | 2021-09-02      |
| hCoV-19/Japan/PG-84514/2021 | EPI_ISL_3897170 | 2021-09-02      |
| hCoV-19/Japan/PG-84515/2021 | EPI_ISL_3897171 | 2021-09-02      |
| hCoV-19/Japan/PG-84516/2021 | EPI_ISL_3897172 | 2021-09-02      |
| hCoV-19/Japan/PG-84517/2021 | EPI_ISL_3897173 | 2021-09-02      |
| hCoV-19/Japan/PG-84518/2021 | EPI_ISL_3897174 | 2021-09-02      |
| hCoV-19/Japan/PG-84519/2021 | EPI_ISL_3897175 | 2021-09-02      |
| hCoV-19/Japan/PG-84520/2021 | EPI_ISL_3897176 | 2021-09-02      |
| hCoV-19/Japan/PG-84521/2021 | EPI_ISL_3897177 | 2021-09-02      |
| hCoV-19/Japan/PG-84522/2021 | EPI_ISL_3897178 | 2021-09-02      |
| hCoV-19/Japan/PG-84523/2021 | EPI_ISL_3897179 | 2021-09-02      |
| hCoV-19/Japan/PG-84524/2021 | EPI_ISL_3897180 | 2021-09-02      |
| hCoV-19/Japan/PG-84525/2021 | EPI_ISL_3897181 | 2021-09-02      |
| hCoV-19/Japan/PG-84526/2021 | EPI_ISL_3897182 | 2021-09-02      |
| hCoV-19/Japan/PG-84527/2021 | EPI_ISL_3897183 | 2021-09-02      |

| virus_name                  | epiID           | submission_date |
|-----------------------------|-----------------|-----------------|
| hCoV-19/Japan/PG-84528/2021 | EPI_ISL_3897184 | 2021-09-02      |
| hCoV-19/Japan/PG-84529/2021 | EPI_ISL_3897185 | 2021-09-02      |
| hCoV-19/Japan/PG-84530/2021 | EPI_ISL_3897186 | 2021-09-02      |
| hCoV-19/Japan/PG-84531/2021 | EPI_ISL_3897187 | 2021-09-02      |
| hCoV-19/Japan/PG-84532/2021 | EPI_ISL_3897188 | 2021-09-02      |
| hCoV-19/Japan/PG-84533/2021 | EPI_ISL_3897189 | 2021-09-02      |
| hCoV-19/Japan/PG-84534/2021 | EPI_ISL_3897190 | 2021-09-02      |
| hCoV-19/Japan/PG-84535/2021 | EPI_ISL_3897191 | 2021-09-02      |
| hCoV-19/Japan/PG-84536/2021 | EPI_ISL_3897192 | 2021-09-02      |
| hCoV-19/Japan/PG-84537/2021 | EPI_ISL_3897193 | 2021-09-02      |
| hCoV-19/Japan/PG-84538/2021 | EPI_ISL_3897194 | 2021-09-02      |
| hCoV-19/Japan/PG-84539/2021 | EPI_ISL_3897195 | 2021-09-02      |
| hCoV-19/Japan/PG-84540/2021 | EPI_ISL_3897196 | 2021-09-02      |
| hCoV-19/Japan/PG-84541/2021 | EPI_ISL_3897197 | 2021-09-02      |
| hCoV-19/Japan/PG-84542/2021 | EPI_ISL_3897198 | 2021-09-02      |
| hCoV-19/Japan/PG-84543/2021 | EPI_ISL_3897199 | 2021-09-02      |
| hCoV-19/Japan/PG-84544/2021 | EPI_ISL_3897200 | 2021-09-02      |
| hCoV-19/Japan/PG-84545/2021 | EPI_ISL_3897201 | 2021-09-02      |
| hCoV-19/Japan/PG-84546/2021 | EPI_ISL_3897202 | 2021-09-02      |
| hCoV-19/Japan/PG-84547/2021 | EPI_ISL_3897203 | 2021-09-02      |
| hCoV-19/Japan/PG-84548/2021 | EPI_ISL_3897204 | 2021-09-02      |
| hCoV-19/Japan/PG-84549/2021 | EPI_ISL_3897205 | 2021-09-02      |
| hCoV-19/Japan/PG-84550/2021 | EPI_ISL_3897206 | 2021-09-02      |
| hCoV-19/Japan/PG-84551/2021 | EPI_ISL_3897207 | 2021-09-02      |
| hCoV-19/Japan/PG-84552/2021 | EPI_ISL_3897208 | 2021-09-02      |
| hCoV-19/Japan/PG-84553/2021 | EPI_ISL_3897209 | 2021-09-02      |
| hCoV-19/Japan/PG-84554/2021 | EPI_ISL_3897210 | 2021-09-02      |
| hCoV-19/Japan/PG-84555/2021 | EPI_ISL_3897211 | 2021-09-02      |
| hCoV-19/Japan/PG-84556/2021 | EPI_ISL_3897212 | 2021-09-02      |
| hCoV-19/Japan/PG-84557/2021 | EPI_ISL_3897213 | 2021-09-02      |
| hCoV-19/Japan/PG-84558/2021 | EPI_ISL_3897214 | 2021-09-02      |
| hCoV-19/Japan/PG-84559/2021 | EPI_ISL_3897215 | 2021-09-02      |
| hCoV-19/Japan/PG-84560/2021 | EPI_ISL_3897216 | 2021-09-02      |
| hCoV-19/Japan/PG-84561/2021 | EPI_ISL_3897217 | 2021-09-02      |
| hCoV-19/Japan/PG-84562/2021 | EPI_ISL_3897218 | 2021-09-02      |
| hCoV-19/Japan/PG-84563/2021 | EPI_ISL_3897219 | 2021-09-02      |
| hCoV-19/Japan/PG-84564/2021 | EPI_ISL_3897220 | 2021-09-02      |
| hCoV-19/Japan/PG-84565/2021 | EPI_ISL_3897221 | 2021-09-02      |
| hCoV-19/Japan/PG-84566/2021 | EPI_ISL_3897222 | 2021-09-02      |
| hCoV-19/Japan/PG-84567/2021 | EPI_ISL_3897223 | 2021-09-02      |
| hCoV-19/Japan/PG-84568/2021 | EPI_ISL_3897224 | 2021-09-02      |
| hCoV-19/Japan/PG-84569/2021 | EPI_ISL_3897225 | 2021-09-02      |
| hCoV-19/Japan/PG-84570/2021 | EPI_ISL_3897226 | 2021-09-02      |
| hCoV-19/Japan/PG-84571/2021 | EPI_ISL_3897227 | 2021-09-02      |
| hCoV-19/Japan/PG-84572/2021 | EPI_ISL_3897228 | 2021-09-02      |
| hCoV-19/Japan/PG-84573/2021 | EPI_ISL_3897229 | 2021-09-02      |
| hCoV-19/Japan/PG-84574/2021 | EPI_ISL_3897230 | 2021-09-02      |
| hCoV-19/Japan/PG-84575/2021 | EPI_ISL_3897231 | 2021-09-02      |
| hCoV-19/Japan/PG-84576/2021 | EPI_ISL_3897232 | 2021-09-02      |
| hCoV-19/Japan/PG-84577/2021 | EPI_ISL_3897233 | 2021-09-02      |
| hCoV-19/Japan/PG-84578/2021 | EPI_ISL_3897234 | 2021-09-02      |
| hCoV-19/Japan/PG-84579/2021 | EPI_ISL_3897235 | 2021-09-02      |
| hCoV-19/Japan/PG-84580/2021 | EPI_ISL_3897236 | 2021-09-02      |
| hCoV-19/Japan/PG-84581/2021 | EPI_ISL_3897237 | 2021-09-02      |

| virus_name                  | epiID           | submission_date |
|-----------------------------|-----------------|-----------------|
| hCoV-19/Japan/PG-84582/2021 | EPI_ISL_3897238 | 2021-09-02      |
| hCoV-19/Japan/PG-84583/2021 | EPI_ISL_3897239 | 2021-09-02      |
| hCoV-19/Japan/PG-84584/2021 | EPI_ISL_3897240 | 2021-09-02      |
| hCoV-19/Japan/PG-84585/2021 | EPI_ISL_3897241 | 2021-09-02      |
| hCoV-19/Japan/PG-84586/2021 | EPI_ISL_3897242 | 2021-09-02      |
| hCoV-19/Japan/PG-84587/2021 | EPI_ISL_3897243 | 2021-09-02      |
| hCoV-19/Japan/PG-84588/2021 | EPI_ISL_3897244 | 2021-09-02      |
| hCoV-19/Japan/PG-84589/2021 | EPI_ISL_3897245 | 2021-09-02      |
| hCoV-19/Japan/PG-84590/2021 | EPI_ISL_3897246 | 2021-09-02      |
| hCoV-19/Japan/PG-84591/2021 | EPI_ISL_3897247 | 2021-09-02      |
| hCoV-19/Japan/PG-84592/2021 | EPI_ISL_3897248 | 2021-09-02      |
| hCoV-19/Japan/PG-84593/2021 | EPI_ISL_3897249 | 2021-09-02      |
| hCoV-19/Japan/PG-84594/2021 | EPI_ISL_3897250 | 2021-09-02      |
| hCoV-19/Japan/PG-84595/2021 | EPI_ISL_3897251 | 2021-09-02      |
| hCoV-19/Japan/PG-84596/2021 | EPI_ISL_3897252 | 2021-09-02      |
| hCoV-19/Japan/PG-84597/2021 | EPI_ISL_3873838 | 2021-09-02      |
| hCoV-19/Japan/PG-84598/2021 | EPI_ISL_3873839 | 2021-09-02      |
| hCoV-19/Japan/PG-84599/2021 | EPI_ISL_3873840 | 2021-09-02      |
| hCoV-19/Japan/PG-84600/2021 | EPI_ISL_3873841 | 2021-09-02      |
| hCoV-19/Japan/PG-84601/2021 | EPI_ISL_3873842 | 2021-09-02      |
| hCoV-19/Japan/PG-84602/2021 | EPI_ISL_3873843 | 2021-09-02      |
| hCoV-19/Japan/PG-84603/2021 | EPI_ISL_3873844 | 2021-09-02      |
| hCoV-19/Japan/PG-84604/2021 | EPI_ISL_3873845 | 2021-09-02      |
| hCoV-19/Japan/PG-84605/2021 | EPI_ISL_3873846 | 2021-09-02      |
| hCoV-19/Japan/PG-84606/2021 | EPI_ISL_3873847 | 2021-09-02      |
| hCoV-19/Japan/PG-84607/2021 | EPI_ISL_3873848 | 2021-09-02      |
| hCoV-19/Japan/PG-84608/2021 | EPI_ISL_3873849 | 2021-09-02      |
| hCoV-19/Japan/PG-84609/2021 | EPI_ISL_3873850 | 2021-09-02      |
| hCoV-19/Japan/PG-84610/2021 | EPI_ISL_3873851 | 2021-09-02      |
| hCoV-19/Japan/PG-84611/2021 | EPI_ISL_3873852 | 2021-09-02      |
| hCoV-19/Japan/PG-84612/2021 | EPI_ISL_3873853 | 2021-09-02      |
| hCoV-19/Japan/PG-84613/2021 | EPI_ISL_3873854 | 2021-09-02      |
| hCoV-19/Japan/PG-84614/2021 | EPI_ISL_3873855 | 2021-09-02      |
| hCoV-19/Japan/PG-84615/2021 | EPI_ISL_3873856 | 2021-09-02      |
| hCoV-19/Japan/PG-84616/2021 | EPI_ISL_3873857 | 2021-09-02      |
| hCoV-19/Japan/PG-84617/2021 | EPI_ISL_3873858 | 2021-09-02      |
| hCoV-19/Japan/PG-84618/2021 | EPI_ISL_3873859 | 2021-09-02      |
| hCoV-19/Japan/PG-84619/2021 | EPI_ISL_3873860 | 2021-09-02      |
| hCoV-19/Japan/PG-84620/2021 | EPI_ISL_3873861 | 2021-09-02      |
| hCoV-19/Japan/PG-84621/2021 | EPI_ISL_3873862 | 2021-09-02      |
| hCoV-19/Japan/PG-84622/2021 | EPI_ISL_3873863 | 2021-09-02      |
| hCoV-19/Japan/PG-84623/2021 | EPI_ISL_3873864 | 2021-09-02      |
| hCoV-19/Japan/PG-84624/2021 | EPI_ISL_3873865 | 2021-09-02      |
| hCoV-19/Japan/PG-84625/2021 | EPI_ISL_3873866 | 2021-09-02      |
| hCoV-19/Japan/PG-84626/2021 | EPI_ISL_3873867 | 2021-09-02      |
| hCoV-19/Japan/PG-84627/2021 | EPI_ISL_3873868 | 2021-09-02      |
| hCoV-19/Japan/PG-84628/2021 | EPI_ISL_3873869 | 2021-09-02      |
| hCoV-19/Japan/PG-84629/2021 | EPI_ISL_3873870 | 2021-09-02      |
| hCoV-19/Japan/PG-84630/2021 | EPI_ISL_3873871 | 2021-09-02      |
| hCoV-19/Japan/PG-84631/2021 | EPI_ISL_3873872 | 2021-09-02      |
| hCoV-19/Japan/PG-84632/2021 | EPI_ISL_3873873 | 2021-09-02      |
| hCoV-19/Japan/PG-84633/2021 | EPI_ISL_3873874 | 2021-09-02      |
| hCoV-19/Japan/PG-84634/2021 | EPI_ISL_3873875 | 2021-09-02      |
| hCoV-19/Japan/PG-84635/2021 | EPI_ISL_3873876 | 2021-09-02      |



| virus_name                  | epiID           | submission_date |
|-----------------------------|-----------------|-----------------|
| hCoV-19/Japan/PG-84636/2021 | EPI_ISL_3873877 | 2021-09-02      |
| hCoV-19/Japan/PG-84637/2021 | EPI_ISL_3873878 | 2021-09-02      |
| hCoV-19/Japan/PG-84638/2021 | EPI_ISL_3873879 | 2021-09-02      |
| hCoV-19/Japan/PG-84639/2021 | EPI_ISL_3873880 | 2021-09-02      |
| hCoV-19/Japan/PG-84640/2021 | EPI_ISL_3873881 | 2021-09-02      |
| hCoV-19/Japan/PG-84641/2021 | EPI_ISL_3875598 | 2021-09-02      |
| hCoV-19/Japan/PG-84642/2021 | EPI_ISL_3875599 | 2021-09-02      |
| hCoV-19/Japan/PG-84643/2021 | EPI_ISL_3875600 | 2021-09-02      |
| hCoV-19/Japan/PG-84644/2021 | EPI_ISL_3875601 | 2021-09-02      |
| hCoV-19/Japan/PG-84645/2021 | EPI_ISL_3875602 | 2021-09-02      |
| hCoV-19/Japan/PG-84646/2021 | EPI_ISL_3875603 | 2021-09-02      |
| hCoV-19/Japan/PG-84647/2021 | EPI_ISL_3875604 | 2021-09-02      |
| hCoV-19/Japan/PG-84648/2021 | EPI_ISL_3875605 | 2021-09-02      |
| hCoV-19/Japan/PG-84649/2021 | EPI_ISL_3875606 | 2021-09-02      |
| hCoV-19/Japan/PG-84650/2021 | EPI_ISL_3875607 | 2021-09-02      |
| hCoV-19/Japan/PG-84651/2021 | EPI_ISL_3875608 | 2021-09-02      |
| hCoV-19/Japan/PG-84652/2021 | EPI_ISL_3875609 | 2021-09-02      |
| hCoV-19/Japan/PG-84653/2021 | EPI_ISL_3875610 | 2021-09-02      |
| hCoV-19/Japan/PG-84654/2021 | EPI_ISL_3875611 | 2021-09-02      |
| hCoV-19/Japan/PG-84655/2021 | EPI_ISL_3875612 | 2021-09-02      |
| hCoV-19/Japan/PG-84656/2021 | EPI_ISL_3875613 | 2021-09-02      |
| hCoV-19/Japan/PG-84657/2021 | EPI_ISL_3875614 | 2021-09-02      |
| hCoV-19/Japan/PG-84658/2021 | EPI_ISL_3875615 | 2021-09-02      |
| hCoV-19/Japan/PG-84659/2021 | EPI_ISL_3875616 | 2021-09-02      |
| hCoV-19/Japan/PG-84660/2021 | EPI_ISL_3875617 | 2021-09-02      |
| hCoV-19/Japan/PG-84661/2021 | EPI_ISL_3875618 | 2021-09-02      |
| hCoV-19/Japan/PG-84662/2021 | EPI_ISL_3875619 | 2021-09-02      |
| hCoV-19/Japan/PG-84663/2021 | EPI_ISL_3875620 | 2021-09-02      |
| hCoV-19/Japan/PG-84664/2021 | EPI_ISL_3875621 | 2021-09-02      |
| hCoV-19/Japan/PG-84665/2021 | EPI_ISL_3875622 | 2021-09-02      |
| hCoV-19/Japan/PG-84667/2021 | EPI_ISL_3875623 | 2021-09-02      |
| hCoV-19/Japan/PG-84668/2021 | EPI_ISL_3875624 | 2021-09-02      |
| hCoV-19/Japan/PG-84669/2021 | EPI_ISL_3875625 | 2021-09-02      |
| hCoV-19/Japan/PG-84670/2021 | EPI_ISL_3875626 | 2021-09-02      |
| hCoV-19/Japan/PG-84671/2021 | EPI_ISL_3875627 | 2021-09-02      |
| hCoV-19/Japan/PG-84672/2021 | EPI_ISL_3875628 | 2021-09-02      |
| hCoV-19/Japan/PG-84673/2021 | EPI_ISL_3875629 | 2021-09-02      |
| hCoV-19/Japan/PG-84674/2021 | EPI_ISL_3875630 | 2021-09-02      |
| hCoV-19/Japan/PG-84675/2021 | EPI_ISL_3875631 | 2021-09-02      |
| hCoV-19/Japan/PG-84676/2021 | EPI_ISL_3875632 | 2021-09-02      |
| hCoV-19/Japan/PG-84677/2021 | EPI_ISL_3875633 | 2021-09-02      |
| hCoV-19/Japan/PG-84678/2021 | EPI_ISL_3875634 | 2021-09-02      |
| hCoV-19/Japan/PG-84679/2021 | EPI_ISL_3875635 | 2021-09-02      |
| hCoV-19/Japan/PG-84680/2021 | EPI_ISL_3875636 | 2021-09-02      |
| hCoV-19/Japan/PG-84681/2021 | EPI_ISL_3875637 | 2021-09-02      |
| hCoV-19/Japan/PG-84682/2021 | EPI_ISL_3875638 | 2021-09-02      |
| hCoV-19/Japan/PG-84683/2021 | EPI_ISL_3875639 | 2021-09-02      |
| hCoV-19/Japan/PG-84684/2021 | EPI_ISL_3875640 | 2021-09-02      |
| hCoV-19/Japan/PG-84685/2021 | EPI_ISL_3875641 | 2021-09-02      |
| hCoV-19/Japan/PG-84686/2021 | EPI_ISL_3875642 | 2021-09-02      |
| hCoV-19/Japan/PG-84687/2021 | EPI_ISL_3875643 | 2021-09-02      |
| hCoV-19/Japan/PG-84688/2021 | EPI_ISL_3875644 | 2021-09-02      |
| hCoV-19/Japan/PG-84689/2021 | EPI_ISL_3875645 | 2021-09-02      |
| hCoV-19/Japan/PG-84690/2021 | EPI_ISL_3875647 | 2021-09-02      |

| virus_name                  | epiID           | submission_date |
|-----------------------------|-----------------|-----------------|
| hCoV-19/Japan/PG-84691/2021 | EPI_ISL_3875649 | 2021-09-02      |
| hCoV-19/Japan/PG-84692/2021 | EPI_ISL_3875653 | 2021-09-02      |
| hCoV-19/Japan/PG-84693/2021 | EPI_ISL_3875656 | 2021-09-02      |
| hCoV-19/Japan/PG-84694/2021 | EPI_ISL_3875659 | 2021-09-02      |
| hCoV-19/Japan/PG-84695/2021 | EPI_ISL_3871415 | 2021-09-02      |
| hCoV-19/Japan/PG-84696/2021 | EPI_ISL_3871416 | 2021-09-02      |
| hCoV-19/Japan/PG-84697/2021 | EPI_ISL_3871417 | 2021-09-02      |
| hCoV-19/Japan/PG-84698/2021 | EPI_ISL_3871418 | 2021-09-02      |
| hCoV-19/Japan/PG-84699/2021 | EPI_ISL_3871419 | 2021-09-02      |
| hCoV-19/Japan/PG-84700/2021 | EPI_ISL_3871420 | 2021-09-02      |
| hCoV-19/Japan/PG-84701/2021 | EPI_ISL_3871421 | 2021-09-02      |
| hCoV-19/Japan/PG-84702/2021 | EPI_ISL_3871422 | 2021-09-02      |
| hCoV-19/Japan/PG-84703/2021 | EPI_ISL_3871423 | 2021-09-02      |
| hCoV-19/Japan/PG-84704/2021 | EPI_ISL_3871424 | 2021-09-02      |
| hCoV-19/Japan/PG-84705/2021 | EPI_ISL_3871425 | 2021-09-02      |
| hCoV-19/Japan/PG-84706/2021 | EPI_ISL_3871426 | 2021-09-02      |
| hCoV-19/Japan/PG-84707/2021 | EPI_ISL_3871427 | 2021-09-02      |
| hCoV-19/Japan/PG-84708/2021 | EPI_ISL_3871428 | 2021-09-02      |
| hCoV-19/Japan/PG-84709/2021 | EPI_ISL_3871429 | 2021-09-02      |
| hCoV-19/Japan/PG-84710/2021 | EPI_ISL_3871823 | 2021-09-02      |
| hCoV-19/Japan/PG-84711/2021 | EPI_ISL_3871824 | 2021-09-02      |
| hCoV-19/Japan/PG-84712/2021 | EPI_ISL_3871825 | 2021-09-02      |
| hCoV-19/Japan/PG-84713/2021 | EPI_ISL_3871826 | 2021-09-02      |
| hCoV-19/Japan/PG-84714/2021 | EPI_ISL_3871827 | 2021-09-02      |
| hCoV-19/Japan/PG-84715/2021 | EPI_ISL_3871828 | 2021-09-02      |
| hCoV-19/Japan/PG-84716/2021 | EPI_ISL_3871829 | 2021-09-02      |
| hCoV-19/Japan/PG-84717/2021 | EPI_ISL_3871830 | 2021-09-02      |
| hCoV-19/Japan/PG-84718/2021 | EPI_ISL_3871831 | 2021-09-02      |
| hCoV-19/Japan/PG-84719/2021 | EPI_ISL_3871832 | 2021-09-02      |
| hCoV-19/Japan/PG-84720/2021 | EPI_ISL_3871833 | 2021-09-02      |
| hCoV-19/Japan/PG-84721/2021 | EPI_ISL_3871834 | 2021-09-02      |
| hCoV-19/Japan/PG-84722/2021 | EPI_ISL_3871835 | 2021-09-02      |
| hCoV-19/Japan/PG-84723/2021 | EPI_ISL_3871836 | 2021-09-02      |
| hCoV-19/Japan/PG-84724/2021 | EPI_ISL_3871837 | 2021-09-02      |
| hCoV-19/Japan/PG-84725/2021 | EPI_ISL_3871838 | 2021-09-02      |
| hCoV-19/Japan/PG-84726/2021 | EPI_ISL_3871839 | 2021-09-02      |
| hCoV-19/Japan/PG-84727/2021 | EPI_ISL_3871840 | 2021-09-02      |
| hCoV-19/Japan/PG-84728/2021 | EPI_ISL_3871841 | 2021-09-02      |
| hCoV-19/Japan/PG-84729/2021 | EPI_ISL_3871842 | 2021-09-02      |
| hCoV-19/Japan/PG-84730/2021 | EPI_ISL_3871843 | 2021-09-02      |
| hCoV-19/Japan/PG-84731/2021 | EPI_ISL_3871844 | 2021-09-02      |
| hCoV-19/Japan/PG-84732/2021 | EPI_ISL_3871845 | 2021-09-02      |
| hCoV-19/Japan/PG-84733/2021 | EPI_ISL_3876168 | 2021-09-02      |
| hCoV-19/Japan/PG-84734/2021 | EPI_ISL_3876169 | 2021-09-02      |
| hCoV-19/Japan/PG-84735/2021 | EPI_ISL_3876170 | 2021-09-02      |
| hCoV-19/Japan/PG-84736/2021 | EPI_ISL_3876171 | 2021-09-02      |
| hCoV-19/Japan/PG-84737/2021 | EPI_ISL_3876172 | 2021-09-02      |
| hCoV-19/Japan/PG-84738/2021 | EPI_ISL_3876173 | 2021-09-02      |
| hCoV-19/Japan/PG-84739/2021 | EPI_ISL_3876174 | 2021-09-02      |
| hCoV-19/Japan/PG-84740/2021 | EPI_ISL_3876175 | 2021-09-02      |
| hCoV-19/Japan/PG-84741/2021 | EPI_ISL_3876176 | 2021-09-02      |
| hCoV-19/Japan/PG-84742/2021 | EPI_ISL_3876177 | 2021-09-02      |
| hCoV-19/Japan/PG-84743/2021 | EPI_ISL_3876178 | 2021-09-02      |
| hCoV-19/Japan/PG-84744/2021 | EPI_ISL_3876179 | 2021-09-02      |

| virus_name                  | epiID           | submission_date |
|-----------------------------|-----------------|-----------------|
| hCoV-19/Japan/PG-84745/2021 | EPI_ISL_3876180 | 2021-09-02      |
| hCoV-19/Japan/PG-84746/2021 | EPI_ISL_3876181 | 2021-09-02      |
| hCoV-19/Japan/PG-84747/2021 | EPI_ISL_3876182 | 2021-09-02      |
| hCoV-19/Japan/PG-84748/2021 | EPI_ISL_3876183 | 2021-09-02      |
| hCoV-19/Japan/PG-84749/2021 | EPI_ISL_3876184 | 2021-09-02      |
| hCoV-19/Japan/PG-84750/2021 | EPI_ISL_3876185 | 2021-09-02      |
| hCoV-19/Japan/PG-84751/2021 | EPI_ISL_3876186 | 2021-09-02      |
| hCoV-19/Japan/PG-84752/2021 | EPI_ISL_3876187 | 2021-09-02      |
| hCoV-19/Japan/PG-84753/2021 | EPI_ISL_3876188 | 2021-09-02      |
| hCoV-19/Japan/PG-84754/2021 | EPI_ISL_3876189 | 2021-09-02      |
| hCoV-19/Japan/PG-84759/2021 | EPI_ISL_3876190 | 2021-09-02      |
| hCoV-19/Japan/PG-84760/2021 | EPI_ISL_3876191 | 2021-09-02      |
| hCoV-19/Japan/PG-84761/2021 | EPI_ISL_3876192 | 2021-09-02      |
| hCoV-19/Japan/PG-84762/2021 | EPI_ISL_3876193 | 2021-09-02      |
| hCoV-19/Japan/PG-84763/2021 | EPI_ISL_3876194 | 2021-09-02      |
| hCoV-19/Japan/PG-84765/2021 | EPI_ISL_3870782 | 2021-09-02      |
| hCoV-19/Japan/PG-84766/2021 | EPI_ISL_3870783 | 2021-09-02      |
| hCoV-19/Japan/PG-84767/2021 | EPI_ISL_3870784 | 2021-09-02      |
| hCoV-19/Japan/PG-84768/2021 | EPI_ISL_3870785 | 2021-09-02      |
| hCoV-19/Japan/PG-84769/2021 | EPI_ISL_3870786 | 2021-09-02      |
| hCoV-19/Japan/PG-84770/2021 | EPI_ISL_3870787 | 2021-09-02      |
| hCoV-19/Japan/PG-84771/2021 | EPI_ISL_3870788 | 2021-09-02      |
| hCoV-19/Japan/PG-84772/2021 | EPI_ISL_3870789 | 2021-09-02      |
| hCoV-19/Japan/PG-84773/2021 | EPI_ISL_3870790 | 2021-09-02      |
| hCoV-19/Japan/PG-84774/2021 | EPI_ISL_3870791 | 2021-09-02      |
| hCoV-19/Japan/PG-84775/2021 | EPI_ISL_3870792 | 2021-09-02      |
| hCoV-19/Japan/PG-84776/2021 | EPI_ISL_3870793 | 2021-09-02      |
| hCoV-19/Japan/PG-84777/2021 | EPI_ISL_3870794 | 2021-09-02      |
| hCoV-19/Japan/PG-84778/2021 | EPI_ISL_3870795 | 2021-09-02      |
| hCoV-19/Japan/PG-84779/2021 | EPI_ISL_3870796 | 2021-09-02      |
| hCoV-19/Japan/PG-84780/2021 | EPI_ISL_3870797 | 2021-09-02      |
| hCoV-19/Japan/PG-84781/2021 | EPI_ISL_3870798 | 2021-09-02      |
| hCoV-19/Japan/PG-84782/2021 | EPI_ISL_3870799 | 2021-09-02      |
| hCoV-19/Japan/PG-84783/2021 | EPI_ISL_3870800 | 2021-09-02      |
| hCoV-19/Japan/PG-84784/2021 | EPI_ISL_3870801 | 2021-09-02      |
| hCoV-19/Japan/PG-84785/2021 | EPI_ISL_3870802 | 2021-09-02      |
| hCoV-19/Japan/PG-84786/2021 | EPI_ISL_3870803 | 2021-09-02      |
| hCoV-19/Japan/PG-84787/2021 | EPI_ISL_3870804 | 2021-09-02      |
| hCoV-19/Japan/PG-84788/2021 | EPI_ISL_3870805 | 2021-09-02      |
| hCoV-19/Japan/PG-84789/2021 | EPI_ISL_3870806 | 2021-09-02      |
| hCoV-19/Japan/PG-84790/2021 | EPI_ISL_3870807 | 2021-09-02      |
| hCoV-19/Japan/PG-84791/2021 | EPI_ISL_3870808 | 2021-09-02      |
| hCoV-19/Japan/PG-84792/2021 | EPI_ISL_3870809 | 2021-09-02      |
| hCoV-19/Japan/PG-84793/2021 | EPI_ISL_3870810 | 2021-09-02      |
| hCoV-19/Japan/PG-84794/2021 | EPI_ISL_3870811 | 2021-09-02      |
| hCoV-19/Japan/PG-84795/2021 | EPI_ISL_3870812 | 2021-09-02      |
| hCoV-19/Japan/PG-84796/2021 | EPI_ISL_3870813 | 2021-09-02      |
| hCoV-19/Japan/PG-84797/2021 | EPI_ISL_3870814 | 2021-09-02      |
| hCoV-19/Japan/PG-84798/2021 | EPI_ISL_3870815 | 2021-09-02      |
| hCoV-19/Japan/PG-84799/2021 | EPI_ISL_3870816 | 2021-09-02      |
| hCoV-19/Japan/PG-84800/2021 | EPI_ISL_3870817 | 2021-09-02      |
| hCoV-19/Japan/PG-84801/2021 | EPI_ISL_3870818 | 2021-09-02      |
| hCoV-19/Japan/PG-84802/2021 | EPI_ISL_3870819 | 2021-09-02      |
| hCoV-19/Japan/PG-84803/2021 | EPI_ISL_3870820 | 2021-09-02      |

| virus_name                  | epiID           | submission_date |
|-----------------------------|-----------------|-----------------|
| hCoV-19/Japan/PG-84804/2021 | EPI_ISL_3870821 | 2021-09-02      |
| hCoV-19/Japan/PG-84805/2021 | EPI_ISL_3870822 | 2021-09-02      |
| hCoV-19/Japan/PG-84806/2021 | EPI_ISL_3870823 | 2021-09-02      |
| hCoV-19/Japan/PG-84807/2021 | EPI_ISL_3871375 | 2021-09-02      |
| hCoV-19/Japan/PG-84808/2021 | EPI_ISL_3871376 | 2021-09-02      |
| hCoV-19/Japan/PG-84809/2021 | EPI_ISL_3871377 | 2021-09-02      |
| hCoV-19/Japan/PG-84810/2021 | EPI_ISL_3871378 | 2021-09-02      |
| hCoV-19/Japan/PG-84811/2021 | EPI_ISL_3871379 | 2021-09-02      |
| hCoV-19/Japan/PG-84812/2021 | EPI_ISL_3872450 | 2021-09-02      |
| hCoV-19/Japan/PG-84813/2021 | EPI_ISL_3872451 | 2021-09-02      |
| hCoV-19/Japan/PG-84814/2021 | EPI_ISL_3872452 | 2021-09-02      |
| hCoV-19/Japan/PG-84815/2021 | EPI_ISL_3872453 | 2021-09-02      |
| hCoV-19/Japan/PG-84816/2021 | EPI_ISL_3872454 | 2021-09-02      |
| hCoV-19/Japan/PG-84817/2021 | EPI_ISL_3872455 | 2021-09-02      |
| hCoV-19/Japan/PG-84818/2021 | EPI_ISL_3872456 | 2021-09-02      |
| hCoV-19/Japan/PG-84819/2021 | EPI_ISL_3872457 | 2021-09-02      |
| hCoV-19/Japan/PG-84820/2021 | EPI_ISL_3872458 | 2021-09-02      |
| hCoV-19/Japan/PG-84821/2021 | EPI_ISL_3872459 | 2021-09-02      |
| hCoV-19/Japan/PG-84823/2021 | EPI_ISL_3872460 | 2021-09-02      |
| hCoV-19/Japan/PG-84824/2021 | EPI_ISL_3872461 | 2021-09-02      |
| hCoV-19/Japan/PG-84825/2021 | EPI_ISL_3872462 | 2021-09-02      |
| hCoV-19/Japan/PG-84826/2021 | EPI_ISL_3872463 | 2021-09-02      |
| hCoV-19/Japan/PG-84827/2021 | EPI_ISL_3872464 | 2021-09-02      |
| hCoV-19/Japan/PG-84828/2021 | EPI_ISL_3872465 | 2021-09-02      |
| hCoV-19/Japan/PG-84829/2021 | EPI_ISL_3872466 | 2021-09-02      |
| hCoV-19/Japan/PG-84830/2021 | EPI_ISL_3872467 | 2021-09-02      |
| hCoV-19/Japan/PG-84831/2021 | EPI_ISL_3872468 | 2021-09-02      |
| hCoV-19/Japan/PG-84832/2021 | EPI_ISL_3872469 | 2021-09-02      |
| hCoV-19/Japan/PG-84833/2021 | EPI_ISL_3872470 | 2021-09-02      |
| hCoV-19/Japan/PG-84834/2021 | EPI_ISL_3872471 | 2021-09-02      |
| hCoV-19/Japan/PG-84835/2021 | EPI_ISL_3872472 | 2021-09-02      |
| hCoV-19/Japan/PG-84836/2021 | EPI_ISL_3872473 | 2021-09-02      |
| hCoV-19/Japan/PG-84837/2021 | EPI_ISL_3872474 | 2021-09-02      |
| hCoV-19/Japan/PG-84838/2021 | EPI_ISL_3872475 | 2021-09-02      |
| hCoV-19/Japan/PG-84839/2021 | EPI_ISL_3872476 | 2021-09-02      |
| hCoV-19/Japan/PG-84840/2021 | EPI_ISL_3872477 | 2021-09-02      |
| hCoV-19/Japan/PG-84841/2021 | EPI_ISL_3872478 | 2021-09-02      |
| hCoV-19/Japan/PG-84842/2021 | EPI_ISL_3872479 | 2021-09-02      |
| hCoV-19/Japan/PG-84843/2021 | EPI_ISL_3872480 | 2021-09-02      |
| hCoV-19/Japan/PG-84844/2021 | EPI_ISL_3872481 | 2021-09-02      |
| hCoV-19/Japan/PG-84845/2021 | EPI_ISL_3872482 | 2021-09-02      |
| hCoV-19/Japan/PG-84846/2021 | EPI_ISL_3872483 | 2021-09-02      |
| hCoV-19/Japan/PG-84847/2021 | EPI_ISL_3872484 | 2021-09-02      |
| hCoV-19/Japan/PG-84848/2021 | EPI_ISL_3872485 | 2021-09-02      |
| hCoV-19/Japan/PG-84849/2021 | EPI_ISL_3872486 | 2021-09-02      |
| hCoV-19/Japan/PG-84850/2021 | EPI_ISL_3872487 | 2021-09-02      |
| hCoV-19/Japan/PG-84851/2021 | EPI_ISL_3872488 | 2021-09-02      |
| hCoV-19/Japan/PG-84852/2021 | EPI_ISL_3872489 | 2021-09-02      |
| hCoV-19/Japan/PG-84853/2021 | EPI_ISL_3872490 | 2021-09-02      |
| hCoV-19/Japan/PG-84854/2021 | EPI_ISL_3872491 | 2021-09-02      |
| hCoV-19/Japan/PG-84855/2021 | EPI_ISL_3872492 | 2021-09-02      |
| hCoV-19/Japan/PG-84856/2021 | EPI_ISL_3872493 | 2021-09-02      |
| hCoV-19/Japan/PG-84857/2021 | EPI_ISL_3872494 | 2021-09-02      |
| hCoV-19/Japan/PG-84858/2021 | EPI_ISL_3872495 | 2021-09-02      |

| virus_name                  | epiID           | submission_date |
|-----------------------------|-----------------|-----------------|
| hCoV-19/Japan/PG-84859/2021 | EPI_ISL_3872496 | 2021-09-02      |
| hCoV-19/Japan/PG-84860/2021 | EPI_ISL_3872942 | 2021-09-02      |
| hCoV-19/Japan/PG-84861/2021 | EPI_ISL_3872943 | 2021-09-02      |
| hCoV-19/Japan/PG-84862/2021 | EPI_ISL_3872944 | 2021-09-02      |
| hCoV-19/Japan/PG-84863/2021 | EPI_ISL_3872945 | 2021-09-02      |
| hCoV-19/Japan/PG-84864/2021 | EPI_ISL_3872946 | 2021-09-02      |
| hCoV-19/Japan/PG-84865/2021 | EPI_ISL_3872947 | 2021-09-02      |
| hCoV-19/Japan/PG-84866/2021 | EPI_ISL_3872948 | 2021-09-02      |
| hCoV-19/Japan/PG-84867/2021 | EPI_ISL_3872949 | 2021-09-02      |
| hCoV-19/Japan/PG-84868/2021 | EPI_ISL_3872950 | 2021-09-02      |
| hCoV-19/Japan/PG-84869/2021 | EPI_ISL_3872951 | 2021-09-02      |
| hCoV-19/Japan/PG-84870/2021 | EPI_ISL_3872952 | 2021-09-02      |
| hCoV-19/Japan/PG-84871/2021 | EPI_ISL_3872953 | 2021-09-02      |
| hCoV-19/Japan/PG-84872/2021 | EPI_ISL_3872954 | 2021-09-02      |
| hCoV-19/Japan/PG-84873/2021 | EPI_ISL_3872955 | 2021-09-02      |
| hCoV-19/Japan/PG-84874/2021 | EPI_ISL_3872956 | 2021-09-02      |
| hCoV-19/Japan/PG-84875/2021 | EPI_ISL_3872957 | 2021-09-02      |
| hCoV-19/Japan/PG-84876/2021 | EPI_ISL_3872958 | 2021-09-02      |
| hCoV-19/Japan/PG-84877/2021 | EPI_ISL_3872959 | 2021-09-02      |
| hCoV-19/Japan/PG-84878/2021 | EPI_ISL_3872960 | 2021-09-02      |
| hCoV-19/Japan/PG-84879/2021 | EPI_ISL_3872961 | 2021-09-02      |
| hCoV-19/Japan/PG-84880/2021 | EPI_ISL_3872962 | 2021-09-02      |
| hCoV-19/Japan/PG-84881/2021 | EPI_ISL_3872963 | 2021-09-02      |
| hCoV-19/Japan/PG-84882/2021 | EPI_ISL_3872964 | 2021-09-02      |
| hCoV-19/Japan/PG-84883/2021 | EPI_ISL_3872965 | 2021-09-02      |
| hCoV-19/Japan/PG-84884/2021 | EPI_ISL_3872966 | 2021-09-02      |
| hCoV-19/Japan/PG-84885/2021 | EPI_ISL_3872967 | 2021-09-02      |
| hCoV-19/Japan/PG-84886/2021 | EPI_ISL_3872968 | 2021-09-02      |
| hCoV-19/Japan/PG-84887/2021 | EPI_ISL_3872969 | 2021-09-02      |
| hCoV-19/Japan/PG-84888/2021 | EPI_ISL_3872970 | 2021-09-02      |
| hCoV-19/Japan/PG-84889/2021 | EPI_ISL_3872971 | 2021-09-02      |
| hCoV-19/Japan/PG-84890/2021 | EPI_ISL_3872972 | 2021-09-02      |
| hCoV-19/Japan/PG-84891/2021 | EPI_ISL_3872973 | 2021-09-02      |
| hCoV-19/Japan/PG-84892/2021 | EPI_ISL_3872974 | 2021-09-02      |
| hCoV-19/Japan/PG-84893/2021 | EPI_ISL_3872975 | 2021-09-02      |
| hCoV-19/Japan/PG-84894/2021 | EPI_ISL_3872976 | 2021-09-02      |
| hCoV-19/Japan/PG-84895/2021 | EPI_ISL_3872977 | 2021-09-02      |
| hCoV-19/Japan/PG-84896/2021 | EPI_ISL_3872978 | 2021-09-02      |
| hCoV-19/Japan/PG-84897/2021 | EPI_ISL_3872979 | 2021-09-02      |
| hCoV-19/Japan/PG-84898/2021 | EPI_ISL_3872980 | 2021-09-02      |
| hCoV-19/Japan/PG-84899/2021 | EPI_ISL_3872981 | 2021-09-02      |
| hCoV-19/Japan/PG-84900/2021 | EPI_ISL_3872982 | 2021-09-02      |
| hCoV-19/Japan/PG-84901/2021 | EPI_ISL_3872983 | 2021-09-02      |
| hCoV-19/Japan/PG-84902/2021 | EPI_ISL_3872984 | 2021-09-02      |
| hCoV-19/Japan/PG-84903/2021 | EPI_ISL_3872985 | 2021-09-02      |
| hCoV-19/Japan/PG-84904/2021 | EPI_ISL_3872986 | 2021-09-02      |
| hCoV-19/Japan/PG-84905/2021 | EPI_ISL_3872987 | 2021-09-02      |
| hCoV-19/Japan/PG-84906/2021 | EPI_ISL_3872988 | 2021-09-02      |
| hCoV-19/Japan/PG-84907/2021 | EPI_ISL_3872989 | 2021-09-02      |
| hCoV-19/Japan/PG-84908/2021 | EPI_ISL_3872990 | 2021-09-02      |
| hCoV-19/Japan/PG-84909/2021 | EPI_ISL_3872991 | 2021-09-02      |
| hCoV-19/Japan/PG-84910/2021 | EPI_ISL_3872992 | 2021-09-02      |
| hCoV-19/Japan/PG-84911/2021 | EPI_ISL_3872993 | 2021-09-02      |
| hCoV-19/Japan/PG-84912/2021 | EPI_ISL_3872994 | 2021-09-02      |

| virus_name                  | epiID           | submission_date |
|-----------------------------|-----------------|-----------------|
| hCoV-19/Japan/PG-84913/2021 | EPI_ISL_3872995 | 2021-09-02      |
| hCoV-19/Japan/PG-84914/2021 | EPI_ISL_3872996 | 2021-09-02      |
| hCoV-19/Japan/PG-84915/2021 | EPI_ISL_3872997 | 2021-09-02      |
| hCoV-19/Japan/PG-84916/2021 | EPI_ISL_3872998 | 2021-09-02      |
| hCoV-19/Japan/PG-84917/2021 | EPI_ISL_3872999 | 2021-09-02      |
| hCoV-19/Japan/PG-84918/2021 | EPI_ISL_3873000 | 2021-09-02      |
| hCoV-19/Japan/PG-84919/2021 | EPI_ISL_3873001 | 2021-09-02      |
| hCoV-19/Japan/PG-84920/2021 | EPI_ISL_3873002 | 2021-09-02      |
| hCoV-19/Japan/PG-84921/2021 | EPI_ISL_3873003 | 2021-09-02      |
| hCoV-19/Japan/PG-84922/2021 | EPI_ISL_3873004 | 2021-09-02      |
| hCoV-19/Japan/PG-84923/2021 | EPI_ISL_3873005 | 2021-09-02      |
| hCoV-19/Japan/PG-84924/2021 | EPI_ISL_3873006 | 2021-09-02      |
| hCoV-19/Japan/PG-84925/2021 | EPI_ISL_3873007 | 2021-09-02      |
| hCoV-19/Japan/PG-84926/2021 | EPI_ISL_3873008 | 2021-09-02      |
| hCoV-19/Japan/PG-84927/2021 | EPI_ISL_3873009 | 2021-09-02      |
| hCoV-19/Japan/PG-84928/2021 | EPI_ISL_3873010 | 2021-09-02      |
| hCoV-19/Japan/PG-84929/2021 | EPI_ISL_3873011 | 2021-09-02      |
| hCoV-19/Japan/PG-84930/2021 | EPI_ISL_3873012 | 2021-09-02      |
| hCoV-19/Japan/PG-84931/2021 | EPI_ISL_3873013 | 2021-09-02      |
| hCoV-19/Japan/PG-84932/2021 | EPI_ISL_3873014 | 2021-09-02      |
| hCoV-19/Japan/PG-84933/2021 | EPI_ISL_3873015 | 2021-09-02      |
| hCoV-19/Japan/PG-84934/2021 | EPI_ISL_3873016 | 2021-09-02      |
| hCoV-19/Japan/PG-84935/2021 | EPI_ISL_3873017 | 2021-09-02      |
| hCoV-19/Japan/PG-84936/2021 | EPI_ISL_3873018 | 2021-09-02      |
| hCoV-19/Japan/PG-84937/2021 | EPI_ISL_3873019 | 2021-09-02      |
| hCoV-19/Japan/PG-84938/2021 | EPI_ISL_3873020 | 2021-09-02      |
| hCoV-19/Japan/PG-84939/2021 | EPI_ISL_3873021 | 2021-09-02      |
| hCoV-19/Japan/PG-84940/2021 | EPI_ISL_3873022 | 2021-09-02      |
| hCoV-19/Japan/PG-84941/2021 | EPI_ISL_3873023 | 2021-09-02      |
| hCoV-19/Japan/PG-84959/2021 | EPI_ISL_3871641 | 2021-09-02      |
| hCoV-19/Japan/PG-84960/2021 | EPI_ISL_3871642 | 2021-09-02      |
| hCoV-19/Japan/PG-84961/2021 | EPI_ISL_3871643 | 2021-09-02      |
| hCoV-19/Japan/PG-84962/2021 | EPI_ISL_3871644 | 2021-09-02      |
| hCoV-19/Japan/PG-84963/2021 | EPI_ISL_3871645 | 2021-09-02      |
| hCoV-19/Japan/PG-84964/2021 | EPI_ISL_3871646 | 2021-09-02      |
| hCoV-19/Japan/PG-84965/2021 | EPI_ISL_3871647 | 2021-09-02      |
| hCoV-19/Japan/PG-84966/2021 | EPI_ISL_3871648 | 2021-09-02      |
| hCoV-19/Japan/PG-84967/2021 | EPI_ISL_3871649 | 2021-09-02      |
| hCoV-19/Japan/PG-84968/2021 | EPI_ISL_3871650 | 2021-09-02      |
| hCoV-19/Japan/PG-84969/2021 | EPI_ISL_3871651 | 2021-09-02      |
| hCoV-19/Japan/PG-84970/2021 | EPI_ISL_3871652 | 2021-09-02      |
| hCoV-19/Japan/PG-84971/2021 | EPI_ISL_3871653 | 2021-09-02      |
| hCoV-19/Japan/PG-84972/2021 | EPI_ISL_3871654 | 2021-09-02      |
| hCoV-19/Japan/PG-84973/2021 | EPI_ISL_3871655 | 2021-09-02      |
| hCoV-19/Japan/PG-84974/2021 | EPI_ISL_3871656 | 2021-09-02      |
| hCoV-19/Japan/PG-84975/2021 | EPI_ISL_3871657 | 2021-09-02      |
| hCoV-19/Japan/PG-84976/2021 | EPI_ISL_3874509 | 2021-09-02      |
| hCoV-19/Japan/PG-84977/2021 | EPI_ISL_3874510 | 2021-09-02      |
| hCoV-19/Japan/PG-84978/2021 | EPI_ISL_3874511 | 2021-09-02      |
| hCoV-19/Japan/PG-84979/2021 | EPI_ISL_3874512 | 2021-09-02      |
| hCoV-19/Japan/PG-84980/2021 | EPI_ISL_3874513 | 2021-09-02      |
| hCoV-19/Japan/PG-84981/2021 | EPI_ISL_3874514 | 2021-09-02      |
| hCoV-19/Japan/PG-84982/2021 | EPI_ISL_3874515 | 2021-09-02      |
| hCoV-19/Japan/PG-84983/2021 | EPI_ISL_3874516 | 2021-09-02      |

| virus_name                  | epiID           | submission_date |
|-----------------------------|-----------------|-----------------|
| hCoV-19/Japan/PG-84984/2021 | EPI_ISL_3874517 | 2021-09-02      |
| hCoV-19/Japan/PG-84985/2021 | EPI_ISL_3873984 | 2021-09-02      |
| hCoV-19/Japan/PG-84986/2021 | EPI_ISL_3873985 | 2021-09-02      |
| hCoV-19/Japan/PG-84987/2021 | EPI_ISL_3873986 | 2021-09-02      |
| hCoV-19/Japan/PG-84988/2021 | EPI_ISL_3873987 | 2021-09-02      |
| hCoV-19/Japan/PG-84989/2021 | EPI_ISL_3873988 | 2021-09-02      |
| hCoV-19/Japan/PG-84990/2021 | EPI_ISL_3873989 | 2021-09-02      |
| hCoV-19/Japan/PG-84991/2021 | EPI_ISL_3873990 | 2021-09-02      |
| hCoV-19/Japan/PG-84992/2021 | EPI_ISL_3873991 | 2021-09-02      |
| hCoV-19/Japan/PG-84993/2021 | EPI_ISL_3873992 | 2021-09-02      |
| hCoV-19/Japan/PG-84994/2021 | EPI_ISL_3873993 | 2021-09-02      |
| hCoV-19/Japan/PG-84995/2021 | EPI_ISL_3873994 | 2021-09-02      |
| hCoV-19/Japan/PG-84996/2021 | EPI_ISL_3873995 | 2021-09-02      |
| hCoV-19/Japan/PG-84997/2021 | EPI_ISL_3873996 | 2021-09-02      |
| hCoV-19/Japan/PG-84998/2021 | EPI_ISL_3873997 | 2021-09-02      |
| hCoV-19/Japan/PG-84999/2021 | EPI_ISL_3873998 | 2021-09-02      |
| hCoV-19/Japan/PG-85000/2021 | EPI_ISL_3873999 | 2021-09-02      |
| hCoV-19/Japan/PG-85001/2021 | EPI_ISL_3874000 | 2021-09-02      |
| hCoV-19/Japan/PG-85002/2021 | EPI_ISL_3874001 | 2021-09-02      |
| hCoV-19/Japan/PG-85003/2021 | EPI_ISL_3874002 | 2021-09-02      |
| hCoV-19/Japan/PG-85004/2021 | EPI_ISL_3874003 | 2021-09-02      |
| hCoV-19/Japan/PG-85005/2021 | EPI_ISL_3874004 | 2021-09-02      |
| hCoV-19/Japan/PG-85006/2021 | EPI_ISL_3874005 | 2021-09-02      |
| hCoV-19/Japan/PG-85007/2021 | EPI_ISL_3871291 | 2021-09-02      |
| hCoV-19/Japan/PG-85008/2021 | EPI_ISL_3871292 | 2021-09-02      |
| hCoV-19/Japan/PG-85009/2021 | EPI_ISL_3871293 | 2021-09-02      |
| hCoV-19/Japan/PG-85010/2021 | EPI_ISL_3871294 | 2021-09-02      |
| hCoV-19/Japan/PG-85011/2021 | EPI_ISL_3871295 | 2021-09-02      |
| hCoV-19/Japan/PG-85012/2021 | EPI_ISL_3871296 | 2021-09-02      |
| hCoV-19/Japan/PG-85013/2021 | EPI_ISL_3871297 | 2021-09-02      |
| hCoV-19/Japan/PG-85014/2021 | EPI_ISL_3871298 | 2021-09-02      |
| hCoV-19/Japan/PG-85015/2021 | EPI_ISL_3871299 | 2021-09-02      |
| hCoV-19/Japan/PG-85016/2021 | EPI_ISL_3871300 | 2021-09-02      |
| hCoV-19/Japan/PG-85017/2021 | EPI_ISL_3871301 | 2021-09-02      |
| hCoV-19/Japan/PG-85018/2021 | EPI_ISL_3871302 | 2021-09-02      |
| hCoV-19/Japan/PG-85019/2021 | EPI_ISL_3871303 | 2021-09-02      |
| hCoV-19/Japan/PG-85020/2021 | EPI_ISL_3871304 | 2021-09-02      |
| hCoV-19/Japan/PG-85021/2021 | EPI_ISL_3871305 | 2021-09-02      |
| hCoV-19/Japan/PG-85022/2021 | EPI_ISL_3871306 | 2021-09-02      |
| hCoV-19/Japan/PG-85023/2021 | EPI_ISL_3871307 | 2021-09-02      |
| hCoV-19/Japan/PG-85024/2021 | EPI_ISL_3871308 | 2021-09-02      |
| hCoV-19/Japan/PG-85025/2021 | EPI_ISL_3871309 | 2021-09-02      |
| hCoV-19/Japan/PG-85026/2021 | EPI_ISL_3871310 | 2021-09-02      |
| hCoV-19/Japan/PG-85027/2021 | EPI_ISL_3871311 | 2021-09-02      |
| hCoV-19/Japan/PG-85028/2021 | EPI_ISL_3871312 | 2021-09-02      |
| hCoV-19/Japan/PG-85029/2021 | EPI_ISL_3871313 | 2021-09-02      |
| hCoV-19/Japan/PG-85030/2021 | EPI_ISL_3872084 | 2021-09-02      |
| hCoV-19/Japan/PG-85031/2021 | EPI_ISL_3872085 | 2021-09-02      |
| hCoV-19/Japan/PG-85032/2021 | EPI_ISL_3872086 | 2021-09-02      |
| hCoV-19/Japan/PG-85033/2021 | EPI_ISL_3872087 | 2021-09-02      |
| hCoV-19/Japan/PG-85034/2021 | EPI_ISL_3872088 | 2021-09-02      |
| hCoV-19/Japan/PG-85035/2021 | EPI_ISL_3872089 | 2021-09-02      |
| hCoV-19/Japan/PG-85036/2021 | EPI_ISL_3872090 | 2021-09-02      |
| hCoV-19/Japan/PG-85037/2021 | EPI_ISL_3872091 | 2021-09-02      |

| virus_name                  | epiID           | submission_date |
|-----------------------------|-----------------|-----------------|
| hCoV-19/Japan/PG-85038/2021 | EPI_ISL_3872092 | 2021-09-02      |
| hCoV-19/Japan/PG-85039/2021 | EPI_ISL_3872093 | 2021-09-02      |
| hCoV-19/Japan/PG-85040/2021 | EPI_ISL_3872094 | 2021-09-02      |
| hCoV-19/Japan/PG-85041/2021 | EPI_ISL_3872095 | 2021-09-02      |
| hCoV-19/Japan/PG-85042/2021 | EPI_ISL_3872096 | 2021-09-02      |
| hCoV-19/Japan/PG-85043/2021 | EPI_ISL_3872097 | 2021-09-02      |
| hCoV-19/Japan/PG-85044/2021 | EPI_ISL_3872098 | 2021-09-02      |
| hCoV-19/Japan/PG-85045/2021 | EPI_ISL_3872099 | 2021-09-02      |
| hCoV-19/Japan/PG-85046/2021 | EPI_ISL_3872100 | 2021-09-02      |
| hCoV-19/Japan/PG-85047/2021 | EPI_ISL_3872101 | 2021-09-02      |
| hCoV-19/Japan/PG-85048/2021 | EPI_ISL_3872102 | 2021-09-02      |
| hCoV-19/Japan/PG-85049/2021 | EPI_ISL_3872103 | 2021-09-02      |
| hCoV-19/Japan/PG-85050/2021 | EPI_ISL_3872104 | 2021-09-02      |
| hCoV-19/Japan/PG-85051/2021 | EPI_ISL_3872105 | 2021-09-02      |
| hCoV-19/Japan/PG-85052/2021 | EPI_ISL_3872106 | 2021-09-02      |
| hCoV-19/Japan/PG-85053/2021 | EPI_ISL_3872107 | 2021-09-02      |
| hCoV-19/Japan/PG-85054/2021 | EPI_ISL_3872108 | 2021-09-02      |
| hCoV-19/Japan/PG-85055/2021 | EPI_ISL_3872109 | 2021-09-02      |
| hCoV-19/Japan/PG-85056/2021 | EPI_ISL_3872110 | 2021-09-02      |
| hCoV-19/Japan/PG-85057/2021 | EPI_ISL_3872111 | 2021-09-02      |
| hCoV-19/Japan/PG-85058/2021 | EPI_ISL_3872112 | 2021-09-02      |
| hCoV-19/Japan/PG-85059/2021 | EPI_ISL_3872113 | 2021-09-02      |
| hCoV-19/Japan/PG-85060/2021 | EPI_ISL_3872114 | 2021-09-02      |
| hCoV-19/Japan/PG-85061/2021 | EPI_ISL_3872115 | 2021-09-02      |
| hCoV-19/Japan/PG-85063/2021 | EPI_ISL_3874371 | 2021-09-02      |
| hCoV-19/Japan/PG-85064/2021 | EPI_ISL_3874372 | 2021-09-02      |
| hCoV-19/Japan/PG-85065/2021 | EPI_ISL_3874373 | 2021-09-02      |
| hCoV-19/Japan/PG-85066/2021 | EPI_ISL_3874374 | 2021-09-02      |
| hCoV-19/Japan/PG-85067/2021 | EPI_ISL_3874375 | 2021-09-02      |
| hCoV-19/Japan/PG-85068/2021 | EPI_ISL_3874376 | 2021-09-02      |
| hCoV-19/Japan/PG-85069/2021 | EPI_ISL_3874377 | 2021-09-02      |
| hCoV-19/Japan/PG-85070/2021 | EPI_ISL_3874378 | 2021-09-02      |
| hCoV-19/Japan/PG-85071/2021 | EPI_ISL_3874379 | 2021-09-02      |
| hCoV-19/Japan/PG-85072/2021 | EPI_ISL_3874380 | 2021-09-02      |
| hCoV-19/Japan/PG-85073/2021 | EPI_ISL_3874381 | 2021-09-02      |
| hCoV-19/Japan/PG-85074/2021 | EPI_ISL_3874382 | 2021-09-02      |
| hCoV-19/Japan/PG-85075/2021 | EPI_ISL_3874383 | 2021-09-02      |
| hCoV-19/Japan/PG-85076/2021 | EPI_ISL_3874384 | 2021-09-02      |
| hCoV-19/Japan/PG-85077/2021 | EPI_ISL_3874385 | 2021-09-02      |
| hCoV-19/Japan/PG-85078/2021 | EPI_ISL_3874386 | 2021-09-02      |
| hCoV-19/Japan/PG-85079/2021 | EPI_ISL_3874387 | 2021-09-02      |
| hCoV-19/Japan/PG-85080/2021 | EPI_ISL_3874388 | 2021-09-02      |
| hCoV-19/Japan/PG-85081/2021 | EPI_ISL_3874389 | 2021-09-02      |
| hCoV-19/Japan/PG-85082/2021 | EPI_ISL_3874390 | 2021-09-02      |
| hCoV-19/Japan/PG-85083/2021 | EPI_ISL_3874391 | 2021-09-02      |
| hCoV-19/Japan/PG-85084/2021 | EPI_ISL_3874392 | 2021-09-02      |
| hCoV-19/Japan/PG-85085/2021 | EPI_ISL_3874393 | 2021-09-02      |
| hCoV-19/Japan/PG-85086/2021 | EPI_ISL_3874394 | 2021-09-02      |
| hCoV-19/Japan/PG-85087/2021 | EPI_ISL_3874439 | 2021-09-02      |
| hCoV-19/Japan/PG-85088/2021 | EPI_ISL_3874440 | 2021-09-02      |
| hCoV-19/Japan/PG-85089/2021 | EPI_ISL_3874441 | 2021-09-02      |
| hCoV-19/Japan/PG-85090/2021 | EPI_ISL_3874442 | 2021-09-02      |
| hCoV-19/Japan/PG-85091/2021 | EPI_ISL_3874443 | 2021-09-02      |
| hCoV-19/Japan/PG-85092/2021 | EPI_ISL_3874444 | 2021-09-02      |



| virus_name                  | epiID           | submission_date |
|-----------------------------|-----------------|-----------------|
| hCoV-19/Japan/PG-85093/2021 | EPI_ISL_3874445 | 2021-09-02      |
| hCoV-19/Japan/PG-85094/2021 | EPI_ISL_3874446 | 2021-09-02      |
| hCoV-19/Japan/PG-85095/2021 | EPI_ISL_3874447 | 2021-09-02      |
| hCoV-19/Japan/PG-85096/2021 | EPI_ISL_3874448 | 2021-09-02      |
| hCoV-19/Japan/PG-85097/2021 | EPI_ISL_3874449 | 2021-09-02      |
| hCoV-19/Japan/PG-85098/2021 | EPI_ISL_3874450 | 2021-09-02      |
| hCoV-19/Japan/PG-85099/2021 | EPI_ISL_3874451 | 2021-09-02      |
| hCoV-19/Japan/PG-85100/2021 | EPI_ISL_3874452 | 2021-09-02      |
| hCoV-19/Japan/PG-85101/2021 | EPI_ISL_3874453 | 2021-09-02      |
| hCoV-19/Japan/PG-85102/2021 | EPI_ISL_3874454 | 2021-09-02      |
| hCoV-19/Japan/PG-85103/2021 | EPI_ISL_3874455 | 2021-09-02      |
| hCoV-19/Japan/PG-85104/2021 | EPI_ISL_3874456 | 2021-09-02      |
| hCoV-19/Japan/PG-85105/2021 | EPI_ISL_3874457 | 2021-09-02      |
| hCoV-19/Japan/PG-85106/2021 | EPI_ISL_3874458 | 2021-09-02      |
| hCoV-19/Japan/PG-85107/2021 | EPI_ISL_3874459 | 2021-09-02      |
| hCoV-19/Japan/PG-85108/2021 | EPI_ISL_3874460 | 2021-09-02      |
| hCoV-19/Japan/PG-85109/2021 | EPI_ISL_3874461 | 2021-09-02      |
| hCoV-19/Japan/PG-85110/2021 | EPI_ISL_3874213 | 2021-09-02      |
| hCoV-19/Japan/PG-85111/2021 | EPI_ISL_3874214 | 2021-09-02      |
| hCoV-19/Japan/PG-85112/2021 | EPI_ISL_3874215 | 2021-09-02      |
| hCoV-19/Japan/PG-85113/2021 | EPI_ISL_3874216 | 2021-09-02      |
| hCoV-19/Japan/PG-85114/2021 | EPI_ISL_3874217 | 2021-09-02      |
| hCoV-19/Japan/PG-85115/2021 | EPI_ISL_3874218 | 2021-09-02      |
| hCoV-19/Japan/PG-85116/2021 | EPI_ISL_3874219 | 2021-09-02      |
| hCoV-19/Japan/PG-85117/2021 | EPI_ISL_3874220 | 2021-09-02      |
| hCoV-19/Japan/PG-85118/2021 | EPI_ISL_3874221 | 2021-09-02      |
| hCoV-19/Japan/PG-85119/2021 | EPI_ISL_3874222 | 2021-09-02      |
| hCoV-19/Japan/PG-85120/2021 | EPI_ISL_3874223 | 2021-09-02      |
| hCoV-19/Japan/PG-85121/2021 | EPI_ISL_3874224 | 2021-09-02      |
| hCoV-19/Japan/PG-85122/2021 | EPI_ISL_3874225 | 2021-09-02      |
| hCoV-19/Japan/PG-85123/2021 | EPI_ISL_3874226 | 2021-09-02      |
| hCoV-19/Japan/PG-85124/2021 | EPI_ISL_3874227 | 2021-09-02      |
| hCoV-19/Japan/PG-85125/2021 | EPI_ISL_3874228 | 2021-09-02      |
| hCoV-19/Japan/PG-85126/2021 | EPI_ISL_3874229 | 2021-09-02      |
| hCoV-19/Japan/PG-85127/2021 | EPI_ISL_3874230 | 2021-09-02      |
| hCoV-19/Japan/PG-85128/2021 | EPI_ISL_3874231 | 2021-09-02      |
| hCoV-19/Japan/PG-85129/2021 | EPI_ISL_3874232 | 2021-09-02      |
| hCoV-19/Japan/PG-85130/2021 | EPI_ISL_3874233 | 2021-09-02      |
| hCoV-19/Japan/PG-85131/2021 | EPI_ISL_3874234 | 2021-09-02      |
| hCoV-19/Japan/PG-85132/2021 | EPI_ISL_3870981 | 2021-09-02      |
| hCoV-19/Japan/PG-85133/2021 | EPI_ISL_3870982 | 2021-09-02      |
| hCoV-19/Japan/PG-85134/2021 | EPI_ISL_3870983 | 2021-09-02      |
| hCoV-19/Japan/PG-85135/2021 | EPI_ISL_3870984 | 2021-09-02      |
| hCoV-19/Japan/PG-85136/2021 | EPI_ISL_3870985 | 2021-09-02      |
| hCoV-19/Japan/PG-85137/2021 | EPI_ISL_3870986 | 2021-09-02      |
| hCoV-19/Japan/PG-85138/2021 | EPI_ISL_3870987 | 2021-09-02      |
| hCoV-19/Japan/PG-85139/2021 | EPI_ISL_3870988 | 2021-09-02      |
| hCoV-19/Japan/PG-85140/2021 | EPI_ISL_3870989 | 2021-09-02      |
| hCoV-19/Japan/PG-85141/2021 | EPI_ISL_3870990 | 2021-09-02      |
| hCoV-19/Japan/PG-85142/2021 | EPI_ISL_3870991 | 2021-09-02      |
| hCoV-19/Japan/PG-85143/2021 | EPI_ISL_3870992 | 2021-09-02      |
| hCoV-19/Japan/PG-85144/2021 | EPI_ISL_3870993 | 2021-09-02      |
| hCoV-19/Japan/PG-85145/2021 | EPI_ISL_3870994 | 2021-09-02      |
| hCoV-19/Japan/PG-85146/2021 | EPI_ISL_3897253 | 2021-09-02      |

| virus_name                  | epiID           | submission_date |
|-----------------------------|-----------------|-----------------|
| hCoV-19/Japan/PG-85147/2021 | EPI_ISL_3897254 | 2021-09-02      |
| hCoV-19/Japan/PG-85148/2021 | EPI_ISL_3897255 | 2021-09-02      |
| hCoV-19/Japan/PG-85149/2021 | EPI_ISL_3897256 | 2021-09-02      |
| hCoV-19/Japan/PG-85150/2021 | EPI_ISL_3897257 | 2021-09-02      |
| hCoV-19/Japan/PG-85151/2021 | EPI_ISL_3897258 | 2021-09-02      |
| hCoV-19/Japan/PG-85152/2021 | EPI_ISL_3897259 | 2021-09-02      |
| hCoV-19/Japan/PG-85153/2021 | EPI_ISL_3897260 | 2021-09-02      |
| hCoV-19/Japan/PG-85154/2021 | EPI_ISL_3897261 | 2021-09-02      |
| hCoV-19/Japan/PG-85155/2021 | EPI_ISL_3897262 | 2021-09-02      |
| hCoV-19/Japan/PG-85156/2021 | EPI_ISL_3897263 | 2021-09-02      |
| hCoV-19/Japan/PG-85157/2021 | EPI_ISL_3897264 | 2021-09-02      |
| hCoV-19/Japan/PG-85158/2021 | EPI_ISL_3897265 | 2021-09-02      |
| hCoV-19/Japan/PG-85159/2021 | EPI_ISL_3897266 | 2021-09-02      |
| hCoV-19/Japan/PG-85160/2021 | EPI_ISL_3897267 | 2021-09-02      |
| hCoV-19/Japan/PG-85161/2021 | EPI_ISL_3897268 | 2021-09-02      |
| hCoV-19/Japan/PG-85162/2021 | EPI_ISL_3897269 | 2021-09-02      |
| hCoV-19/Japan/PG-85163/2021 | EPI_ISL_3897270 | 2021-09-02      |
| hCoV-19/Japan/PG-85164/2021 | EPI_ISL_3897271 | 2021-09-02      |
| hCoV-19/Japan/PG-85165/2021 | EPI_ISL_3897272 | 2021-09-02      |
| hCoV-19/Japan/PG-85166/2021 | EPI_ISL_3897273 | 2021-09-02      |
| hCoV-19/Japan/PG-85167/2021 | EPI_ISL_3897274 | 2021-09-02      |
| hCoV-19/Japan/PG-85168/2021 | EPI_ISL_3897275 | 2021-09-02      |
| hCoV-19/Japan/PG-85169/2021 | EPI_ISL_3897276 | 2021-09-02      |
| hCoV-19/Japan/PG-85170/2021 | EPI_ISL_3897277 | 2021-09-02      |
| hCoV-19/Japan/PG-85171/2021 | EPI_ISL_3897278 | 2021-09-02      |
| hCoV-19/Japan/PG-85172/2021 | EPI_ISL_3897279 | 2021-09-02      |
| hCoV-19/Japan/PG-85173/2021 | EPI_ISL_3897280 | 2021-09-02      |
| hCoV-19/Japan/PG-85174/2021 | EPI_ISL_3897281 | 2021-09-02      |
| hCoV-19/Japan/PG-85175/2021 | EPI_ISL_3897282 | 2021-09-02      |
| hCoV-19/Japan/PG-85176/2021 | EPI_ISL_3897283 | 2021-09-02      |
| hCoV-19/Japan/PG-85177/2021 | EPI_ISL_3897284 | 2021-09-02      |
| hCoV-19/Japan/PG-85178/2021 | EPI_ISL_3897285 | 2021-09-02      |
| hCoV-19/Japan/PG-85179/2021 | EPI_ISL_3897286 | 2021-09-02      |
| hCoV-19/Japan/PG-85180/2021 | EPI_ISL_3897287 | 2021-09-02      |
| hCoV-19/Japan/PG-85181/2021 | EPI_ISL_3897288 | 2021-09-02      |
| hCoV-19/Japan/PG-85182/2021 | EPI_ISL_3897289 | 2021-09-02      |
| hCoV-19/Japan/PG-85183/2021 | EPI_ISL_3897290 | 2021-09-02      |
| hCoV-19/Japan/PG-85184/2021 | EPI_ISL_3897291 | 2021-09-02      |
| hCoV-19/Japan/PG-85185/2021 | EPI_ISL_3897292 | 2021-09-02      |
| hCoV-19/Japan/PG-85186/2021 | EPI_ISL_3897293 | 2021-09-02      |
| hCoV-19/Japan/PG-85187/2021 | EPI_ISL_3897294 | 2021-09-02      |
| hCoV-19/Japan/PG-85188/2021 | EPI_ISL_3897295 | 2021-09-02      |
| hCoV-19/Japan/PG-85189/2021 | EPI_ISL_3897296 | 2021-09-02      |
| hCoV-19/Japan/PG-85190/2021 | EPI_ISL_3897297 | 2021-09-02      |
| hCoV-19/Japan/PG-85191/2021 | EPI_ISL_3897298 | 2021-09-02      |
| hCoV-19/Japan/PG-85192/2021 | EPI_ISL_3897299 | 2021-09-02      |
| hCoV-19/Japan/PG-85193/2021 | EPI_ISL_3897300 | 2021-09-02      |
| hCoV-19/Japan/PG-85194/2021 | EPI_ISL_3897301 | 2021-09-02      |
| hCoV-19/Japan/PG-85195/2021 | EPI_ISL_3897302 | 2021-09-02      |
| hCoV-19/Japan/PG-85196/2021 | EPI_ISL_3897303 | 2021-09-02      |
| hCoV-19/Japan/PG-85197/2021 | EPI_ISL_3897304 | 2021-09-02      |
| hCoV-19/Japan/PG-85198/2021 | EPI_ISL_3897305 | 2021-09-02      |
| hCoV-19/Japan/PG-85199/2021 | EPI_ISL_3897306 | 2021-09-02      |
| hCoV-19/Japan/PG-85200/2021 | EPI_ISL_3897307 | 2021-09-02      |

| virus_name                  | epiID           | submission_date |
|-----------------------------|-----------------|-----------------|
| hCoV-19/Japan/PG-85201/2021 | EPI_ISL_3897308 | 2021-09-02      |
| hCoV-19/Japan/PG-85202/2021 | EPI_ISL_3897309 | 2021-09-02      |
| hCoV-19/Japan/PG-85203/2021 | EPI_ISL_3897310 | 2021-09-02      |
| hCoV-19/Japan/PG-85204/2021 | EPI_ISL_3897311 | 2021-09-02      |
| hCoV-19/Japan/PG-85205/2021 | EPI_ISL_3897312 | 2021-09-02      |
| hCoV-19/Japan/PG-85206/2021 | EPI_ISL_3897313 | 2021-09-02      |
| hCoV-19/Japan/PG-85207/2021 | EPI_ISL_3897314 | 2021-09-02      |
| hCoV-19/Japan/PG-85208/2021 | EPI_ISL_3897315 | 2021-09-02      |
| hCoV-19/Japan/PG-85209/2021 | EPI_ISL_3897316 | 2021-09-02      |
| hCoV-19/Japan/PG-85210/2021 | EPI_ISL_3897317 | 2021-09-02      |
| hCoV-19/Japan/PG-85211/2021 | EPI_ISL_3897318 | 2021-09-02      |
| hCoV-19/Japan/PG-85212/2021 | EPI_ISL_3897319 | 2021-09-02      |
| hCoV-19/Japan/PG-85213/2021 | EPI_ISL_3897320 | 2021-09-02      |
| hCoV-19/Japan/PG-85214/2021 | EPI_ISL_3897321 | 2021-09-02      |
| hCoV-19/Japan/PG-85215/2021 | EPI_ISL_3897322 | 2021-09-02      |
| hCoV-19/Japan/PG-85216/2021 | EPI_ISL_3897323 | 2021-09-02      |
| hCoV-19/Japan/PG-85217/2021 | EPI_ISL_3897324 | 2021-09-02      |
| hCoV-19/Japan/PG-85218/2021 | EPI_ISL_3897325 | 2021-09-02      |
| hCoV-19/Japan/PG-85219/2021 | EPI_ISL_3897326 | 2021-09-02      |
| hCoV-19/Japan/PG-85220/2021 | EPI_ISL_3897327 | 2021-09-02      |
| hCoV-19/Japan/PG-85221/2021 | EPI_ISL_3897328 | 2021-09-02      |
| hCoV-19/Japan/PG-85222/2021 | EPI_ISL_3897329 | 2021-09-02      |
| hCoV-19/Japan/PG-85223/2021 | EPI_ISL_3897330 | 2021-09-02      |
| hCoV-19/Japan/PG-85224/2021 | EPI_ISL_3897331 | 2021-09-02      |
| hCoV-19/Japan/PG-85225/2021 | EPI_ISL_3897332 | 2021-09-02      |
| hCoV-19/Japan/PG-85226/2021 | EPI_ISL_3897333 | 2021-09-02      |
| hCoV-19/Japan/PG-85227/2021 | EPI_ISL_3897334 | 2021-09-02      |
| hCoV-19/Japan/PG-85228/2021 | EPI_ISL_3897335 | 2021-09-02      |
| hCoV-19/Japan/PG-85229/2021 | EPI_ISL_3897336 | 2021-09-02      |
| hCoV-19/Japan/PG-85230/2021 | EPI_ISL_3897337 | 2021-09-02      |
| hCoV-19/Japan/PG-85231/2021 | EPI_ISL_3897338 | 2021-09-02      |
| hCoV-19/Japan/PG-85232/2021 | EPI_ISL_3897339 | 2021-09-02      |
| hCoV-19/Japan/PG-85233/2021 | EPI_ISL_3897340 | 2021-09-02      |
| hCoV-19/Japan/PG-85234/2021 | EPI_ISL_3897341 | 2021-09-02      |
| hCoV-19/Japan/PG-85235/2021 | EPI_ISL_3897342 | 2021-09-02      |
| hCoV-19/Japan/PG-85236/2021 | EPI_ISL_3897343 | 2021-09-02      |
| hCoV-19/Japan/PG-85237/2021 | EPI_ISL_3897344 | 2021-09-02      |
| hCoV-19/Japan/PG-85238/2021 | EPI_ISL_3897345 | 2021-09-02      |
| hCoV-19/Japan/PG-85239/2021 | EPI_ISL_3897346 | 2021-09-02      |
| hCoV-19/Japan/PG-85240/2021 | EPI_ISL_3897347 | 2021-09-02      |
| hCoV-19/Japan/PG-85241/2021 | EPI_ISL_3897348 | 2021-09-02      |
| hCoV-19/Japan/PG-85242/2021 | EPI_ISL_3897349 | 2021-09-02      |
| hCoV-19/Japan/PG-85243/2021 | EPI_ISL_3897350 | 2021-09-02      |
| hCoV-19/Japan/PG-85244/2021 | EPI_ISL_3897351 | 2021-09-02      |
| hCoV-19/Japan/PG-85245/2021 | EPI_ISL_3897352 | 2021-09-02      |
| hCoV-19/Japan/PG-85246/2021 | EPI_ISL_3897353 | 2021-09-02      |
| hCoV-19/Japan/PG-85247/2021 | EPI_ISL_3897354 | 2021-09-02      |
| hCoV-19/Japan/PG-85248/2021 | EPI_ISL_3897355 | 2021-09-02      |
| hCoV-19/Japan/PG-85249/2021 | EPI_ISL_3897356 | 2021-09-02      |
| hCoV-19/Japan/PG-85250/2021 | EPI_ISL_3897357 | 2021-09-02      |
| hCoV-19/Japan/PG-85251/2021 | EPI_ISL_3897358 | 2021-09-02      |
| hCoV-19/Japan/PG-85252/2021 | EPI_ISL_3897359 | 2021-09-02      |
| hCoV-19/Japan/PG-85253/2021 | EPI_ISL_3897360 | 2021-09-02      |
| hCoV-19/Japan/PG-85254/2021 | EPI_ISL_3897362 | 2021-09-02      |

| virus_name                  | epiID           | submission_date |
|-----------------------------|-----------------|-----------------|
| hCoV-19/Japan/PG-85255/2021 | EPI_ISL_3897363 | 2021-09-02      |
| hCoV-19/Japan/PG-85256/2021 | EPI_ISL_3897364 | 2021-09-02      |
| hCoV-19/Japan/PG-85257/2021 | EPI_ISL_3897365 | 2021-09-02      |
| hCoV-19/Japan/PG-85258/2021 | EPI_ISL_3897366 | 2021-09-02      |
| hCoV-19/Japan/PG-85259/2021 | EPI_ISL_3897367 | 2021-09-02      |
| hCoV-19/Japan/PG-85260/2021 | EPI_ISL_3897368 | 2021-09-02      |
| hCoV-19/Japan/PG-85261/2021 | EPI_ISL_3897369 | 2021-09-02      |
| hCoV-19/Japan/PG-85262/2021 | EPI_ISL_3897370 | 2021-09-02      |
| hCoV-19/Japan/PG-85263/2021 | EPI_ISL_3897371 | 2021-09-02      |
| hCoV-19/Japan/PG-85264/2021 | EPI_ISL_3897372 | 2021-09-02      |
| hCoV-19/Japan/PG-85265/2021 | EPI_ISL_3897373 | 2021-09-02      |
| hCoV-19/Japan/PG-85266/2021 | EPI_ISL_3897374 | 2021-09-02      |
| hCoV-19/Japan/PG-85267/2021 | EPI_ISL_3897375 | 2021-09-02      |
| hCoV-19/Japan/PG-85268/2021 | EPI_ISL_3897376 | 2021-09-02      |
| hCoV-19/Japan/PG-85269/2021 | EPI_ISL_3897377 | 2021-09-02      |
| hCoV-19/Japan/PG-85270/2021 | EPI_ISL_3897378 | 2021-09-02      |
| hCoV-19/Japan/PG-85271/2021 | EPI_ISL_3897379 | 2021-09-02      |
| hCoV-19/Japan/PG-85272/2021 | EPI_ISL_3897380 | 2021-09-02      |
| hCoV-19/Japan/PG-85273/2021 | EPI_ISL_3897381 | 2021-09-02      |
| hCoV-19/Japan/PG-85274/2021 | EPI_ISL_3897382 | 2021-09-02      |
| hCoV-19/Japan/PG-85275/2021 | EPI_ISL_3897383 | 2021-09-02      |
| hCoV-19/Japan/PG-85276/2021 | EPI_ISL_3897384 | 2021-09-02      |
| hCoV-19/Japan/PG-85277/2021 | EPI_ISL_3897385 | 2021-09-02      |
| hCoV-19/Japan/PG-85278/2021 | EPI_ISL_3897386 | 2021-09-02      |
| hCoV-19/Japan/PG-85279/2021 | EPI_ISL_3897387 | 2021-09-02      |
| hCoV-19/Japan/PG-85280/2021 | EPI_ISL_3897388 | 2021-09-02      |
| hCoV-19/Japan/PG-85281/2021 | EPI_ISL_3897389 | 2021-09-02      |
| hCoV-19/Japan/PG-85282/2021 | EPI_ISL_3897392 | 2021-09-02      |
| hCoV-19/Japan/PG-85283/2021 | EPI_ISL_3897395 | 2021-09-02      |
| hCoV-19/Japan/PG-85284/2021 | EPI_ISL_3897398 | 2021-09-02      |
| hCoV-19/Japan/PG-85285/2021 | EPI_ISL_3897401 | 2021-09-02      |
| hCoV-19/Japan/PG-85286/2021 | EPI_ISL_3897405 | 2021-09-02      |
| hCoV-19/Japan/PG-85287/2021 | EPI_ISL_3897407 | 2021-09-02      |
| hCoV-19/Japan/PG-85288/2021 | EPI_ISL_3897409 | 2021-09-02      |
| hCoV-19/Japan/PG-85289/2021 | EPI_ISL_3897410 | 2021-09-02      |
| hCoV-19/Japan/PG-85290/2021 | EPI_ISL_3897412 | 2021-09-02      |
| hCoV-19/Japan/PG-85291/2021 | EPI_ISL_3897413 | 2021-09-02      |
| hCoV-19/Japan/PG-85292/2021 | EPI_ISL_3897415 | 2021-09-02      |
| hCoV-19/Japan/PG-85293/2021 | EPI_ISL_3897416 | 2021-09-02      |
| hCoV-19/Japan/PG-85294/2021 | EPI_ISL_3897417 | 2021-09-02      |
| hCoV-19/Japan/PG-85295/2021 | EPI_ISL_3897419 | 2021-09-02      |
| hCoV-19/Japan/PG-85296/2021 | EPI_ISL_3897420 | 2021-09-02      |
| hCoV-19/Japan/PG-85297/2021 | EPI_ISL_3897422 | 2021-09-02      |
| hCoV-19/Japan/PG-85298/2021 | EPI_ISL_3897423 | 2021-09-02      |
| hCoV-19/Japan/PG-85299/2021 | EPI_ISL_3897424 | 2021-09-02      |
| hCoV-19/Japan/PG-85300/2021 | EPI_ISL_3897426 | 2021-09-02      |
| hCoV-19/Japan/PG-85301/2021 | EPI_ISL_3897427 | 2021-09-02      |
| hCoV-19/Japan/PG-85302/2021 | EPI_ISL_3897429 | 2021-09-02      |
| hCoV-19/Japan/PG-85303/2021 | EPI_ISL_3897430 | 2021-09-02      |
| hCoV-19/Japan/PG-85304/2021 | EPI_ISL_3897431 | 2021-09-02      |
| hCoV-19/Japan/PG-85305/2021 | EPI_ISL_3897434 | 2021-09-02      |
| hCoV-19/Japan/PG-85306/2021 | EPI_ISL_3897437 | 2021-09-02      |
| hCoV-19/Japan/PG-85307/2021 | EPI_ISL_3897441 | 2021-09-02      |
| hCoV-19/Japan/PG-85308/2021 | EPI_ISL_3897444 | 2021-09-02      |

| virus_name                  | epiID           | submission_date |
|-----------------------------|-----------------|-----------------|
| hCoV-19/Japan/PG-85309/2021 | EPI_ISL_3897447 | 2021-09-02      |
| hCoV-19/Japan/PG-85310/2021 | EPI_ISL_3897449 | 2021-09-02      |
| hCoV-19/Japan/PG-85311/2021 | EPI_ISL_3897450 | 2021-09-02      |
| hCoV-19/Japan/PG-85312/2021 | EPI_ISL_3897452 | 2021-09-02      |
| hCoV-19/Japan/PG-85313/2021 | EPI_ISL_3897453 | 2021-09-02      |
| hCoV-19/Japan/PG-85314/2021 | EPI_ISL_3897455 | 2021-09-02      |
| hCoV-19/Japan/PG-85315/2021 | EPI_ISL_3897456 | 2021-09-02      |
| hCoV-19/Japan/PG-85316/2021 | EPI_ISL_3897457 | 2021-09-02      |
| hCoV-19/Japan/PG-85317/2021 | EPI_ISL_3897459 | 2021-09-02      |
| hCoV-19/Japan/PG-85318/2021 | EPI_ISL_3897460 | 2021-09-02      |
| hCoV-19/Japan/PG-85319/2021 | EPI_ISL_3897462 | 2021-09-02      |
| hCoV-19/Japan/PG-85320/2021 | EPI_ISL_3897463 | 2021-09-02      |
| hCoV-19/Japan/PG-85321/2021 | EPI_ISL_3897465 | 2021-09-02      |
| hCoV-19/Japan/PG-85322/2021 | EPI_ISL_3897466 | 2021-09-02      |
| hCoV-19/Japan/PG-85323/2021 | EPI_ISL_3897467 | 2021-09-02      |
| hCoV-19/Japan/PG-85324/2021 | EPI_ISL_3897469 | 2021-09-02      |
| hCoV-19/Japan/PG-85325/2021 | EPI_ISL_3897470 | 2021-09-02      |
| hCoV-19/Japan/PG-85326/2021 | EPI_ISL_3897472 | 2021-09-02      |
| hCoV-19/Japan/PG-85327/2021 | EPI_ISL_3897473 | 2021-09-02      |
| hCoV-19/Japan/PG-85328/2021 | EPI_ISL_3897475 | 2021-09-02      |
| hCoV-19/Japan/PG-85329/2021 | EPI_ISL_3897476 | 2021-09-02      |
| hCoV-19/Japan/PG-85330/2021 | EPI_ISL_3897477 | 2021-09-02      |
| hCoV-19/Japan/PG-85331/2021 | EPI_ISL_3897479 | 2021-09-02      |
| hCoV-19/Japan/PG-85332/2021 | EPI_ISL_3897480 | 2021-09-02      |
| hCoV-19/Japan/PG-85333/2021 | EPI_ISL_3897482 | 2021-09-02      |
| hCoV-19/Japan/PG-85334/2021 | EPI_ISL_3897483 | 2021-09-02      |
| hCoV-19/Japan/PG-85335/2021 | EPI_ISL_3897484 | 2021-09-02      |
| hCoV-19/Japan/PG-85336/2021 | EPI_ISL_3897486 | 2021-09-02      |
| hCoV-19/Japan/PG-85337/2021 | EPI_ISL_3897487 | 2021-09-02      |
| hCoV-19/Japan/PG-85338/2021 | EPI_ISL_3897489 | 2021-09-02      |
| hCoV-19/Japan/PG-85339/2021 | EPI_ISL_3897490 | 2021-09-02      |
| hCoV-19/Japan/PG-85340/2021 | EPI_ISL_3897492 | 2021-09-02      |
| hCoV-19/Japan/PG-85341/2021 | EPI_ISL_3897493 | 2021-09-02      |
| hCoV-19/Japan/PG-85342/2021 | EPI_ISL_3897495 | 2021-09-02      |
| hCoV-19/Japan/PG-85343/2021 | EPI_ISL_3897496 | 2021-09-02      |
| hCoV-19/Japan/PG-85344/2021 | EPI_ISL_3897498 | 2021-09-02      |
| hCoV-19/Japan/PG-85345/2021 | EPI_ISL_3897501 | 2021-09-02      |
| hCoV-19/Japan/PG-85346/2021 | EPI_ISL_3897504 | 2021-09-02      |
| hCoV-19/Japan/PG-85347/2021 | EPI_ISL_3897506 | 2021-09-02      |
| hCoV-19/Japan/PG-85348/2021 | EPI_ISL_3897507 | 2021-09-02      |
| hCoV-19/Japan/PG-85349/2021 | EPI_ISL_3897509 | 2021-09-02      |
| hCoV-19/Japan/PG-85350/2021 | EPI_ISL_3897510 | 2021-09-02      |
| hCoV-19/Japan/PG-85351/2021 | EPI_ISL_3897512 | 2021-09-02      |
| hCoV-19/Japan/PG-85352/2021 | EPI_ISL_3897513 | 2021-09-02      |
| hCoV-19/Japan/PG-85353/2021 | EPI_ISL_3897515 | 2021-09-02      |
| hCoV-19/Japan/PG-85354/2021 | EPI_ISL_3897516 | 2021-09-02      |
| hCoV-19/Japan/PG-85355/2021 | EPI_ISL_3897518 | 2021-09-02      |
| hCoV-19/Japan/PG-85356/2021 | EPI_ISL_3897519 | 2021-09-02      |
| hCoV-19/Japan/PG-85357/2021 | EPI_ISL_3897521 | 2021-09-02      |
| hCoV-19/Japan/PG-85358/2021 | EPI_ISL_3897522 | 2021-09-02      |
| hCoV-19/Japan/PG-85359/2021 | EPI_ISL_3897524 | 2021-09-02      |
| hCoV-19/Japan/PG-85360/2021 | EPI_ISL_3897527 | 2021-09-02      |
| hCoV-19/Japan/PG-85361/2021 | EPI_ISL_3897531 | 2021-09-02      |
| hCoV-19/Japan/PG-85362/2021 | EPI_ISL_3897534 | 2021-09-02      |

| virus_name                  | epiID           | submission_date |
|-----------------------------|-----------------|-----------------|
| hCoV-19/Japan/PG-85363/2021 | EPI_ISL_3897537 | 2021-09-02      |
| hCoV-19/Japan/PG-85364/2021 | EPI_ISL_3897540 | 2021-09-02      |
| hCoV-19/Japan/PG-85365/2021 | EPI_ISL_3897541 | 2021-09-02      |
| hCoV-19/Japan/PG-85366/2021 | EPI_ISL_3897542 | 2021-09-02      |
| hCoV-19/Japan/PG-85367/2021 | EPI_ISL_3897544 | 2021-09-02      |
| hCoV-19/Japan/PG-85368/2021 | EPI_ISL_3897545 | 2021-09-02      |
| hCoV-19/Japan/PG-85369/2021 | EPI_ISL_3897547 | 2021-09-02      |
| hCoV-19/Japan/PG-85370/2021 | EPI_ISL_3897548 | 2021-09-02      |
| hCoV-19/Japan/PG-85371/2021 | EPI_ISL_3897550 | 2021-09-02      |
| hCoV-19/Japan/PG-85372/2021 | EPI_ISL_3897551 | 2021-09-02      |
| hCoV-19/Japan/PG-85373/2021 | EPI_ISL_3897553 | 2021-09-02      |
| hCoV-19/Japan/PG-85374/2021 | EPI_ISL_3897554 | 2021-09-02      |
| hCoV-19/Japan/PG-85375/2021 | EPI_ISL_3897555 | 2021-09-02      |
| hCoV-19/Japan/PG-85376/2021 | EPI_ISL_3897557 | 2021-09-02      |
| hCoV-19/Japan/PG-85377/2021 | EPI_ISL_3897558 | 2021-09-02      |
| hCoV-19/Japan/PG-85378/2021 | EPI_ISL_3897560 | 2021-09-02      |
| hCoV-19/Japan/PG-85379/2021 | EPI_ISL_3897561 | 2021-09-02      |
| hCoV-19/Japan/PG-85380/2021 | EPI_ISL_3897563 | 2021-09-02      |
| hCoV-19/Japan/PG-85381/2021 | EPI_ISL_3897564 | 2021-09-02      |
| hCoV-19/Japan/PG-85382/2021 | EPI_ISL_3897566 | 2021-09-02      |
| hCoV-19/Japan/PG-85383/2021 | EPI_ISL_3897567 | 2021-09-02      |
| hCoV-19/Japan/PG-85384/2021 | EPI_ISL_3897569 | 2021-09-02      |
| hCoV-19/Japan/PG-85385/2021 | EPI_ISL_3897570 | 2021-09-02      |
| hCoV-19/Japan/PG-85386/2021 | EPI_ISL_3897572 | 2021-09-02      |
| hCoV-19/Japan/PG-85387/2021 | EPI_ISL_3897573 | 2021-09-02      |
| hCoV-19/Japan/PG-85388/2021 | EPI_ISL_3897575 | 2021-09-02      |
| hCoV-19/Japan/PG-85389/2021 | EPI_ISL_3897576 | 2021-09-02      |
| hCoV-19/Japan/PG-85390/2021 | EPI_ISL_3897579 | 2021-09-02      |
| hCoV-19/Japan/PG-85391/2021 | EPI_ISL_3897582 | 2021-09-02      |
| hCoV-19/Japan/PG-85392/2021 | EPI_ISL_3897585 | 2021-09-02      |
| hCoV-19/Japan/PG-85393/2021 | EPI_ISL_3897589 | 2021-09-02      |
| hCoV-19/Japan/PG-85394/2021 | EPI_ISL_3897592 | 2021-09-02      |
| hCoV-19/Japan/PG-85395/2021 | EPI_ISL_3897593 | 2021-09-02      |
| hCoV-19/Japan/PG-85396/2021 | EPI_ISL_3897595 | 2021-09-02      |
| hCoV-19/Japan/PG-85397/2021 | EPI_ISL_3897596 | 2021-09-02      |
| hCoV-19/Japan/PG-85398/2021 | EPI_ISL_3897599 | 2021-09-02      |
| hCoV-19/Japan/PG-85399/2021 | EPI_ISL_3897602 | 2021-09-02      |
| hCoV-19/Japan/PG-85400/2021 | EPI_ISL_3897606 | 2021-09-02      |
| hCoV-19/Japan/PG-85401/2021 | EPI_ISL_3897609 | 2021-09-02      |
| hCoV-19/Japan/PG-85402/2021 | EPI_ISL_3897613 | 2021-09-02      |
| hCoV-19/Japan/PG-85403/2021 | EPI_ISL_3897616 | 2021-09-02      |
| hCoV-19/Japan/PG-85404/2021 | EPI_ISL_3897620 | 2021-09-02      |
| hCoV-19/Japan/PG-85405/2021 | EPI_ISL_3897623 | 2021-09-02      |
| hCoV-19/Japan/PG-85406/2021 | EPI_ISL_3897627 | 2021-09-02      |
| hCoV-19/Japan/PG-85407/2021 | EPI_ISL_3897628 | 2021-09-02      |
| hCoV-19/Japan/PG-85408/2021 | EPI_ISL_3897629 | 2021-09-02      |
| hCoV-19/Japan/PG-85409/2021 | EPI_ISL_3897631 | 2021-09-02      |
| hCoV-19/Japan/PG-85410/2021 | EPI_ISL_3897632 | 2021-09-02      |
| hCoV-19/Japan/PG-85411/2021 | EPI_ISL_3897635 | 2021-09-02      |
| hCoV-19/Japan/PG-85412/2021 | EPI_ISL_3897638 | 2021-09-02      |
| hCoV-19/Japan/PG-85413/2021 | EPI_ISL_3897641 | 2021-09-02      |
| hCoV-19/Japan/PG-85414/2021 | EPI_ISL_3897643 | 2021-09-02      |
| hCoV-19/Japan/PG-85415/2021 | EPI_ISL_3897644 | 2021-09-02      |
| hCoV-19/Japan/PG-85416/2021 | EPI_ISL_3897646 | 2021-09-02      |

| virus_name                  | epiID           | submission_date |
|-----------------------------|-----------------|-----------------|
| hCoV-19/Japan/PG-85417/2021 | EPI_ISL_3897647 | 2021-09-02      |
| hCoV-19/Japan/PG-85418/2021 | EPI_ISL_3897648 | 2021-09-02      |
| hCoV-19/Japan/PG-85419/2021 | EPI_ISL_3897650 | 2021-09-02      |
| hCoV-19/Japan/PG-85420/2021 | EPI_ISL_3897651 | 2021-09-02      |
| hCoV-19/Japan/PG-85421/2021 | EPI_ISL_3897653 | 2021-09-02      |
| hCoV-19/Japan/PG-85422/2021 | EPI_ISL_3897654 | 2021-09-02      |
| hCoV-19/Japan/PG-85423/2021 | EPI_ISL_3897655 | 2021-09-02      |
| hCoV-19/Japan/PG-85424/2021 | EPI_ISL_3897659 | 2021-09-02      |
| hCoV-19/Japan/PG-85425/2021 | EPI_ISL_3897662 | 2021-09-02      |
| hCoV-19/Japan/PG-85426/2021 | EPI_ISL_3897665 | 2021-09-02      |
| hCoV-19/Japan/PG-85427/2021 | EPI_ISL_3897669 | 2021-09-02      |
| hCoV-19/Japan/PG-85428/2021 | EPI_ISL_3897672 | 2021-09-02      |
| hCoV-19/Japan/PG-85429/2021 | EPI_ISL_3897676 | 2021-09-02      |
| hCoV-19/Japan/PG-85430/2021 | EPI_ISL_3897679 | 2021-09-02      |
| hCoV-19/Japan/PG-85431/2021 | EPI_ISL_3897683 | 2021-09-02      |
| hCoV-19/Japan/PG-85432/2021 | EPI_ISL_3897686 | 2021-09-02      |
| hCoV-19/Japan/PG-85433/2021 | EPI_ISL_3897689 | 2021-09-02      |
| hCoV-19/Japan/PG-85434/2021 | EPI_ISL_3897692 | 2021-09-02      |
| hCoV-19/Japan/PG-85435/2021 | EPI_ISL_3897696 | 2021-09-02      |
| hCoV-19/Japan/PG-85436/2021 | EPI_ISL_3897699 | 2021-09-02      |
| hCoV-19/Japan/PG-85437/2021 | EPI_ISL_3897703 | 2021-09-02      |
| hCoV-19/Japan/PG-85438/2021 | EPI_ISL_3897706 | 2021-09-02      |
| hCoV-19/Japan/PG-85439/2021 | EPI_ISL_3897710 | 2021-09-02      |
| hCoV-19/Japan/PG-85440/2021 | EPI_ISL_3897713 | 2021-09-02      |
| hCoV-19/Japan/PG-85441/2021 | EPI_ISL_3897717 | 2021-09-02      |
| hCoV-19/Japan/PG-85442/2021 | EPI_ISL_3897718 | 2021-09-02      |
| hCoV-19/Japan/PG-85443/2021 | EPI_ISL_3897720 | 2021-09-02      |
| hCoV-19/Japan/PG-85444/2021 | EPI_ISL_3897721 | 2021-09-02      |
| hCoV-19/Japan/PG-85445/2021 | EPI_ISL_3897722 | 2021-09-02      |
| hCoV-19/Japan/PG-85446/2021 | EPI_ISL_3897724 | 2021-09-02      |
| hCoV-19/Japan/PG-85447/2021 | EPI_ISL_3897725 | 2021-09-02      |
| hCoV-19/Japan/PG-85448/2021 | EPI_ISL_3897727 | 2021-09-02      |
| hCoV-19/Japan/PG-85449/2021 | EPI_ISL_3897728 | 2021-09-02      |
| hCoV-19/Japan/PG-85450/2021 | EPI_ISL_3897729 | 2021-09-02      |
| hCoV-19/Japan/PG-85451/2021 | EPI_ISL_3897731 | 2021-09-02      |
| hCoV-19/Japan/PG-85452/2021 | EPI_ISL_3897732 | 2021-09-02      |
| hCoV-19/Japan/PG-85453/2021 | EPI_ISL_3897733 | 2021-09-02      |
| hCoV-19/Japan/PG-85454/2021 | EPI_ISL_3897736 | 2021-09-02      |
| hCoV-19/Japan/PG-85455/2021 | EPI_ISL_3897739 | 2021-09-02      |
| hCoV-19/Japan/PG-85456/2021 | EPI_ISL_3897742 | 2021-09-02      |
| hCoV-19/Japan/PG-85457/2021 | EPI_ISL_3897743 | 2021-09-02      |
| hCoV-19/Japan/PG-85458/2021 | EPI_ISL_3897744 | 2021-09-02      |
| hCoV-19/Japan/PG-85459/2021 | EPI_ISL_3897747 | 2021-09-02      |
| hCoV-19/Japan/PG-85460/2021 | EPI_ISL_3897751 | 2021-09-02      |
| hCoV-19/Japan/PG-85461/2021 | EPI_ISL_3897752 | 2021-09-02      |
| hCoV-19/Japan/PG-85462/2021 | EPI_ISL_3897753 | 2021-09-02      |
| hCoV-19/Japan/PG-85463/2021 | EPI_ISL_3897754 | 2021-09-02      |
| hCoV-19/Japan/PG-85464/2021 | EPI_ISL_3897755 | 2021-09-02      |
| hCoV-19/Japan/PG-85465/2021 | EPI_ISL_3897756 | 2021-09-02      |
| hCoV-19/Japan/PG-85466/2021 | EPI_ISL_3897757 | 2021-09-02      |
| hCoV-19/Japan/PG-85467/2021 | EPI_ISL_3897758 | 2021-09-02      |
| hCoV-19/Japan/PG-85468/2021 | EPI_ISL_3897759 | 2021-09-02      |
| hCoV-19/Japan/PG-85469/2021 | EPI_ISL_3897760 | 2021-09-02      |
| hCoV-19/Japan/PG-85470/2021 | EPI_ISL_3897761 | 2021-09-02      |

| virus_name                  | epiID           | submission_date |
|-----------------------------|-----------------|-----------------|
| hCoV-19/Japan/PG-85471/2021 | EPI_ISL_3897762 | 2021-09-02      |
| hCoV-19/Japan/PG-85472/2021 | EPI_ISL_3897763 | 2021-09-02      |
| hCoV-19/Japan/PG-85473/2021 | EPI_ISL_3897764 | 2021-09-02      |
| hCoV-19/Japan/PG-85474/2021 | EPI_ISL_3897765 | 2021-09-02      |
| hCoV-19/Japan/PG-85475/2021 | EPI_ISL_3897766 | 2021-09-02      |
| hCoV-19/Japan/PG-85476/2021 | EPI_ISL_3897767 | 2021-09-02      |
| hCoV-19/Japan/PG-85477/2021 | EPI_ISL_3897768 | 2021-09-02      |
| hCoV-19/Japan/PG-85478/2021 | EPI_ISL_3897769 | 2021-09-02      |
| hCoV-19/Japan/PG-85479/2021 | EPI_ISL_3897770 | 2021-09-02      |
| hCoV-19/Japan/PG-85480/2021 | EPI_ISL_3897771 | 2021-09-02      |
| hCoV-19/Japan/PG-85481/2021 | EPI_ISL_3897772 | 2021-09-02      |
| hCoV-19/Japan/PG-85482/2021 | EPI_ISL_3897773 | 2021-09-02      |
| hCoV-19/Japan/PG-85483/2021 | EPI_ISL_3897774 | 2021-09-02      |
| hCoV-19/Japan/PG-85484/2021 | EPI_ISL_3897775 | 2021-09-02      |
| hCoV-19/Japan/PG-85485/2021 | EPI_ISL_3897776 | 2021-09-02      |
| hCoV-19/Japan/PG-85486/2021 | EPI_ISL_3897777 | 2021-09-02      |
| hCoV-19/Japan/PG-85487/2021 | EPI_ISL_3897778 | 2021-09-02      |
| hCoV-19/Japan/PG-85488/2021 | EPI_ISL_3897779 | 2021-09-02      |
| hCoV-19/Japan/PG-85489/2021 | EPI_ISL_3897780 | 2021-09-02      |
| hCoV-19/Japan/PG-85490/2021 | EPI_ISL_3897781 | 2021-09-02      |
| hCoV-19/Japan/PG-85491/2021 | EPI_ISL_3897782 | 2021-09-02      |
| hCoV-19/Japan/PG-85492/2021 | EPI_ISL_3897783 | 2021-09-02      |
| hCoV-19/Japan/PG-85493/2021 | EPI_ISL_3897784 | 2021-09-02      |
| hCoV-19/Japan/PG-85494/2021 | EPI_ISL_3897785 | 2021-09-02      |
| hCoV-19/Japan/PG-85495/2021 | EPI_ISL_3897786 | 2021-09-02      |
| hCoV-19/Japan/PG-85496/2021 | EPI_ISL_3897787 | 2021-09-02      |
| hCoV-19/Japan/PG-85497/2021 | EPI_ISL_3897788 | 2021-09-02      |
| hCoV-19/Japan/PG-85498/2021 | EPI_ISL_3897789 | 2021-09-02      |
| hCoV-19/Japan/PG-85499/2021 | EPI_ISL_3897790 | 2021-09-02      |
| hCoV-19/Japan/PG-85500/2021 | EPI_ISL_3897791 | 2021-09-02      |
| hCoV-19/Japan/PG-85501/2021 | EPI_ISL_3897792 | 2021-09-02      |
| hCoV-19/Japan/PG-85502/2021 | EPI_ISL_3897793 | 2021-09-02      |
| hCoV-19/Japan/PG-85503/2021 | EPI_ISL_3897794 | 2021-09-02      |
| hCoV-19/Japan/PG-85504/2021 | EPI_ISL_3897795 | 2021-09-02      |
| hCoV-19/Japan/PG-85505/2021 | EPI_ISL_3897796 | 2021-09-02      |
| hCoV-19/Japan/PG-85506/2021 | EPI_ISL_3897797 | 2021-09-02      |
| hCoV-19/Japan/PG-85507/2021 | EPI_ISL_3897798 | 2021-09-02      |
| hCoV-19/Japan/PG-85508/2021 | EPI_ISL_3897799 | 2021-09-02      |
| hCoV-19/Japan/PG-85509/2021 | EPI_ISL_3897800 | 2021-09-02      |
| hCoV-19/Japan/PG-85510/2021 | EPI_ISL_3897801 | 2021-09-02      |
| hCoV-19/Japan/PG-85511/2021 | EPI_ISL_3897802 | 2021-09-02      |
| hCoV-19/Japan/PG-85512/2021 | EPI_ISL_3897803 | 2021-09-02      |
| hCoV-19/Japan/PG-85513/2021 | EPI_ISL_3897804 | 2021-09-02      |
| hCoV-19/Japan/PG-85514/2021 | EPI_ISL_3897805 | 2021-09-02      |
| hCoV-19/Japan/PG-85515/2021 | EPI_ISL_3897806 | 2021-09-02      |
| hCoV-19/Japan/PG-85516/2021 | EPI_ISL_3897807 | 2021-09-02      |
| hCoV-19/Japan/PG-85517/2021 | EPI_ISL_3897808 | 2021-09-02      |
| hCoV-19/Japan/PG-85518/2021 | EPI_ISL_3897809 | 2021-09-02      |
| hCoV-19/Japan/PG-85519/2021 | EPI_ISL_3897810 | 2021-09-02      |
| hCoV-19/Japan/PG-85520/2021 | EPI_ISL_3897811 | 2021-09-02      |
| hCoV-19/Japan/PG-85521/2021 | EPI_ISL_3897812 | 2021-09-02      |
| hCoV-19/Japan/PG-85522/2021 | EPI_ISL_3897813 | 2021-09-02      |
| hCoV-19/Japan/PG-85523/2021 | EPI_ISL_3897814 | 2021-09-02      |
| hCoV-19/Japan/PG-85524/2021 | EPI_ISL_3897815 | 2021-09-02      |



| virus_name                  | epiID           | submission_date |
|-----------------------------|-----------------|-----------------|
| hCoV-19/Japan/PG-85525/2021 | EPI_ISL_3897816 | 2021-09-02      |
| hCoV-19/Japan/PG-85526/2021 | EPI_ISL_3897817 | 2021-09-02      |
| hCoV-19/Japan/PG-85527/2021 | EPI_ISL_3897818 | 2021-09-02      |
| hCoV-19/Japan/PG-85528/2021 | EPI_ISL_3897819 | 2021-09-02      |
| hCoV-19/Japan/PG-85529/2021 | EPI_ISL_3897820 | 2021-09-02      |
| hCoV-19/Japan/PG-85530/2021 | EPI_ISL_3897821 | 2021-09-02      |
| hCoV-19/Japan/PG-85531/2021 | EPI_ISL_3897822 | 2021-09-02      |
| hCoV-19/Japan/PG-85532/2021 | EPI_ISL_3897823 | 2021-09-02      |
| hCoV-19/Japan/PG-85533/2021 | EPI_ISL_3897824 | 2021-09-02      |
| hCoV-19/Japan/PG-85534/2021 | EPI_ISL_3897825 | 2021-09-02      |
| hCoV-19/Japan/PG-85535/2021 | EPI_ISL_3897826 | 2021-09-02      |
| hCoV-19/Japan/PG-85536/2021 | EPI_ISL_3897827 | 2021-09-02      |
| hCoV-19/Japan/PG-85537/2021 | EPI_ISL_3897828 | 2021-09-02      |
| hCoV-19/Japan/PG-85538/2021 | EPI_ISL_3897829 | 2021-09-02      |
| hCoV-19/Japan/PG-85539/2021 | EPI_ISL_3897830 | 2021-09-02      |
| hCoV-19/Japan/PG-85540/2021 | EPI_ISL_3897831 | 2021-09-02      |
| hCoV-19/Japan/PG-85541/2021 | EPI_ISL_3897832 | 2021-09-02      |
| hCoV-19/Japan/PG-85542/2021 | EPI_ISL_3897833 | 2021-09-02      |
| hCoV-19/Japan/PG-85543/2021 | EPI_ISL_3897834 | 2021-09-02      |
| hCoV-19/Japan/PG-85544/2021 | EPI_ISL_3897835 | 2021-09-02      |
| hCoV-19/Japan/PG-85545/2021 | EPI_ISL_3897836 | 2021-09-02      |
| hCoV-19/Japan/PG-85546/2021 | EPI_ISL_3897837 | 2021-09-02      |
| hCoV-19/Japan/PG-85547/2021 | EPI_ISL_3897838 | 2021-09-02      |
| hCoV-19/Japan/PG-85548/2021 | EPI_ISL_3897839 | 2021-09-02      |
| hCoV-19/Japan/PG-85549/2021 | EPI_ISL_3897840 | 2021-09-02      |
| hCoV-19/Japan/PG-85550/2021 | EPI_ISL_3897841 | 2021-09-02      |
| hCoV-19/Japan/PG-85551/2021 | EPI_ISL_3897842 | 2021-09-02      |
| hCoV-19/Japan/PG-85552/2021 | EPI_ISL_3897843 | 2021-09-02      |
| hCoV-19/Japan/PG-85553/2021 | EPI_ISL_3897844 | 2021-09-02      |
| hCoV-19/Japan/PG-85554/2021 | EPI_ISL_3897845 | 2021-09-02      |
| hCoV-19/Japan/PG-85555/2021 | EPI_ISL_3897846 | 2021-09-02      |
| hCoV-19/Japan/PG-85556/2021 | EPI_ISL_3897847 | 2021-09-02      |
| hCoV-19/Japan/PG-85557/2021 | EPI_ISL_3897848 | 2021-09-02      |
| hCoV-19/Japan/PG-85558/2021 | EPI_ISL_3897849 | 2021-09-02      |
| hCoV-19/Japan/PG-85559/2021 | EPI_ISL_3897850 | 2021-09-02      |
| hCoV-19/Japan/PG-85560/2021 | EPI_ISL_3897851 | 2021-09-02      |
| hCoV-19/Japan/PG-85561/2021 | EPI_ISL_3897852 | 2021-09-02      |
| hCoV-19/Japan/PG-85562/2021 | EPI_ISL_3897853 | 2021-09-02      |
| hCoV-19/Japan/PG-85563/2021 | EPI_ISL_3897854 | 2021-09-02      |
| hCoV-19/Japan/PG-85564/2021 | EPI_ISL_3897855 | 2021-09-02      |
| hCoV-19/Japan/PG-85565/2021 | EPI_ISL_3897856 | 2021-09-02      |
| hCoV-19/Japan/PG-85566/2021 | EPI_ISL_3897857 | 2021-09-02      |
| hCoV-19/Japan/PG-85567/2021 | EPI_ISL_3897858 | 2021-09-02      |
| hCoV-19/Japan/PG-85568/2021 | EPI_ISL_3897859 | 2021-09-02      |
| hCoV-19/Japan/PG-85569/2021 | EPI_ISL_3897860 | 2021-09-02      |
| hCoV-19/Japan/PG-85570/2021 | EPI_ISL_3897861 | 2021-09-02      |
| hCoV-19/Japan/PG-85571/2021 | EPI_ISL_3897862 | 2021-09-02      |
| hCoV-19/Japan/PG-85572/2021 | EPI_ISL_3897863 | 2021-09-02      |
| hCoV-19/Japan/PG-85573/2021 | EPI_ISL_3897864 | 2021-09-02      |
| hCoV-19/Japan/PG-85574/2021 | EPI_ISL_3897865 | 2021-09-02      |
| hCoV-19/Japan/PG-85575/2021 | EPI_ISL_3897866 | 2021-09-02      |
| hCoV-19/Japan/PG-85576/2021 | EPI_ISL_3897867 | 2021-09-02      |
| hCoV-19/Japan/PG-85577/2021 | EPI_ISL_3897868 | 2021-09-02      |
| hCoV-19/Japan/PG-85578/2021 | EPI_ISL_3897869 | 2021-09-02      |

| virus_name                  | epiID           | submission_date |
|-----------------------------|-----------------|-----------------|
| hCoV-19/Japan/PG-85579/2021 | EPI_ISL_3897870 | 2021-09-02      |
| hCoV-19/Japan/PG-85580/2021 | EPI_ISL_3897871 | 2021-09-02      |
| hCoV-19/Japan/PG-85581/2021 | EPI_ISL_3897872 | 2021-09-02      |
| hCoV-19/Japan/PG-85582/2021 | EPI_ISL_3897873 | 2021-09-02      |
| hCoV-19/Japan/PG-85583/2021 | EPI_ISL_3897874 | 2021-09-02      |
| hCoV-19/Japan/PG-85584/2021 | EPI_ISL_3897875 | 2021-09-02      |
| hCoV-19/Japan/PG-85585/2021 | EPI_ISL_3897876 | 2021-09-02      |
| hCoV-19/Japan/PG-85586/2021 | EPI_ISL_3897877 | 2021-09-02      |
| hCoV-19/Japan/PG-85587/2021 | EPI_ISL_3897878 | 2021-09-02      |
| hCoV-19/Japan/PG-85588/2021 | EPI_ISL_3897879 | 2021-09-02      |
| hCoV-19/Japan/PG-85589/2021 | EPI_ISL_3897880 | 2021-09-02      |
| hCoV-19/Japan/PG-85590/2021 | EPI_ISL_3897881 | 2021-09-02      |
| hCoV-19/Japan/PG-85591/2021 | EPI_ISL_3897882 | 2021-09-02      |
| hCoV-19/Japan/PG-85592/2021 | EPI_ISL_3897883 | 2021-09-02      |
| hCoV-19/Japan/PG-85593/2021 | EPI_ISL_3897884 | 2021-09-02      |
| hCoV-19/Japan/PG-85594/2021 | EPI_ISL_3897885 | 2021-09-02      |
| hCoV-19/Japan/PG-85595/2021 | EPI_ISL_3897886 | 2021-09-02      |
| hCoV-19/Japan/PG-85596/2021 | EPI_ISL_3897887 | 2021-09-02      |
| hCoV-19/Japan/PG-85597/2021 | EPI_ISL_3897888 | 2021-09-02      |
| hCoV-19/Japan/PG-85598/2021 | EPI_ISL_3897889 | 2021-09-02      |
| hCoV-19/Japan/PG-85599/2021 | EPI_ISL_3897890 | 2021-09-02      |
| hCoV-19/Japan/PG-85600/2021 | EPI_ISL_3897891 | 2021-09-02      |
| hCoV-19/Japan/PG-85601/2021 | EPI_ISL_3897892 | 2021-09-02      |
| hCoV-19/Japan/PG-85602/2021 | EPI_ISL_3897893 | 2021-09-02      |
| hCoV-19/Japan/PG-85603/2021 | EPI_ISL_3897894 | 2021-09-02      |
| hCoV-19/Japan/PG-85604/2021 | EPI_ISL_3897895 | 2021-09-02      |
| hCoV-19/Japan/PG-85605/2021 | EPI_ISL_3897896 | 2021-09-02      |
| hCoV-19/Japan/PG-85606/2021 | EPI_ISL_3897897 | 2021-09-02      |
| hCoV-19/Japan/PG-85607/2021 | EPI_ISL_3897898 | 2021-09-02      |
| hCoV-19/Japan/PG-85608/2021 | EPI_ISL_3897899 | 2021-09-02      |
| hCoV-19/Japan/PG-85609/2021 | EPI_ISL_3897900 | 2021-09-02      |
| hCoV-19/Japan/PG-85610/2021 | EPI_ISL_3897901 | 2021-09-02      |
| hCoV-19/Japan/PG-85611/2021 | EPI_ISL_3897902 | 2021-09-02      |
| hCoV-19/Japan/PG-85612/2021 | EPI_ISL_3897903 | 2021-09-02      |
| hCoV-19/Japan/PG-85613/2021 | EPI_ISL_3897904 | 2021-09-02      |
| hCoV-19/Japan/PG-85614/2021 | EPI_ISL_3897905 | 2021-09-02      |
| hCoV-19/Japan/PG-85615/2021 | EPI_ISL_3897906 | 2021-09-02      |
| hCoV-19/Japan/PG-85616/2021 | EPI_ISL_3897907 | 2021-09-02      |
| hCoV-19/Japan/PG-85617/2021 | EPI_ISL_3897908 | 2021-09-02      |
| hCoV-19/Japan/PG-85618/2021 | EPI_ISL_3897909 | 2021-09-02      |
| hCoV-19/Japan/PG-85619/2021 | EPI_ISL_3897910 | 2021-09-02      |
| hCoV-19/Japan/PG-85620/2021 | EPI_ISL_3897911 | 2021-09-02      |
| hCoV-19/Japan/PG-85621/2021 | EPI_ISL_3897912 | 2021-09-02      |
| hCoV-19/Japan/PG-85622/2021 | EPI_ISL_3897913 | 2021-09-02      |
| hCoV-19/Japan/PG-85623/2021 | EPI_ISL_3897914 | 2021-09-02      |
| hCoV-19/Japan/PG-85624/2021 | EPI_ISL_3897915 | 2021-09-02      |
| hCoV-19/Japan/PG-85625/2021 | EPI_ISL_3897916 | 2021-09-02      |
| hCoV-19/Japan/PG-85626/2021 | EPI_ISL_3897917 | 2021-09-02      |
| hCoV-19/Japan/PG-85627/2021 | EPI_ISL_3897918 | 2021-09-02      |
| hCoV-19/Japan/PG-85628/2021 | EPI_ISL_3897919 | 2021-09-02      |
| hCoV-19/Japan/PG-85629/2021 | EPI_ISL_3897920 | 2021-09-02      |
| hCoV-19/Japan/PG-85630/2021 | EPI_ISL_3897921 | 2021-09-02      |
| hCoV-19/Japan/PG-85631/2021 | EPI_ISL_3897922 | 2021-09-02      |
| hCoV-19/Japan/PG-85632/2021 | EPI_ISL_3897923 | 2021-09-02      |

| virus_name                  | epiID           | submission_date |
|-----------------------------|-----------------|-----------------|
| hCoV-19/Japan/PG-85633/2021 | EPI_ISL_3897924 | 2021-09-02      |
| hCoV-19/Japan/PG-85634/2021 | EPI_ISL_3897925 | 2021-09-02      |
| hCoV-19/Japan/PG-85635/2021 | EPI_ISL_3897926 | 2021-09-02      |
| hCoV-19/Japan/PG-85636/2021 | EPI_ISL_3897927 | 2021-09-02      |
| hCoV-19/Japan/PG-85637/2021 | EPI_ISL_3897928 | 2021-09-02      |
| hCoV-19/Japan/PG-85638/2021 | EPI_ISL_3897929 | 2021-09-02      |
| hCoV-19/Japan/PG-85639/2021 | EPI_ISL_3897930 | 2021-09-02      |
| hCoV-19/Japan/PG-85640/2021 | EPI_ISL_3897931 | 2021-09-02      |
| hCoV-19/Japan/PG-85641/2021 | EPI_ISL_3897932 | 2021-09-02      |
| hCoV-19/Japan/PG-85642/2021 | EPI_ISL_3897933 | 2021-09-02      |
| hCoV-19/Japan/PG-85643/2021 | EPI_ISL_3897934 | 2021-09-02      |
| hCoV-19/Japan/PG-85644/2021 | EPI_ISL_3897935 | 2021-09-02      |
| hCoV-19/Japan/PG-85645/2021 | EPI_ISL_3897936 | 2021-09-02      |
| hCoV-19/Japan/PG-85646/2021 | EPI_ISL_3897937 | 2021-09-02      |
| hCoV-19/Japan/PG-85647/2021 | EPI_ISL_3897938 | 2021-09-02      |
| hCoV-19/Japan/PG-85648/2021 | EPI_ISL_3897939 | 2021-09-02      |
| hCoV-19/Japan/PG-85649/2021 | EPI_ISL_3897940 | 2021-09-02      |
| hCoV-19/Japan/PG-85650/2021 | EPI_ISL_3897941 | 2021-09-02      |
| hCoV-19/Japan/PG-85651/2021 | EPI_ISL_3897942 | 2021-09-02      |
| hCoV-19/Japan/PG-85652/2021 | EPI_ISL_3897943 | 2021-09-02      |
| hCoV-19/Japan/PG-85653/2021 | EPI_ISL_3897944 | 2021-09-02      |
| hCoV-19/Japan/PG-85654/2021 | EPI_ISL_3897945 | 2021-09-02      |
| hCoV-19/Japan/PG-85655/2021 | EPI_ISL_3897946 | 2021-09-02      |
| hCoV-19/Japan/PG-85656/2021 | EPI_ISL_3897947 | 2021-09-02      |
| hCoV-19/Japan/PG-85657/2021 | EPI_ISL_3897948 | 2021-09-02      |
| hCoV-19/Japan/PG-85658/2021 | EPI_ISL_3897949 | 2021-09-02      |
| hCoV-19/Japan/PG-85659/2021 | EPI_ISL_3897950 | 2021-09-02      |
| hCoV-19/Japan/PG-85660/2021 | EPI_ISL_3897951 | 2021-09-02      |
| hCoV-19/Japan/PG-85661/2021 | EPI_ISL_3897952 | 2021-09-02      |
| hCoV-19/Japan/PG-85662/2021 | EPI_ISL_3897953 | 2021-09-02      |
| hCoV-19/Japan/PG-85663/2021 | EPI_ISL_3897954 | 2021-09-02      |
| hCoV-19/Japan/PG-85664/2021 | EPI_ISL_3897955 | 2021-09-02      |
| hCoV-19/Japan/PG-85665/2021 | EPI_ISL_3897956 | 2021-09-02      |
| hCoV-19/Japan/PG-85666/2021 | EPI_ISL_3897957 | 2021-09-02      |
| hCoV-19/Japan/PG-85667/2021 | EPI_ISL_3897958 | 2021-09-02      |
| hCoV-19/Japan/PG-85668/2021 | EPI_ISL_3897959 | 2021-09-02      |
| hCoV-19/Japan/PG-85669/2021 | EPI_ISL_3897960 | 2021-09-02      |
| hCoV-19/Japan/PG-85670/2021 | EPI_ISL_3897961 | 2021-09-02      |
| hCoV-19/Japan/PG-85671/2021 | EPI_ISL_3897962 | 2021-09-02      |
| hCoV-19/Japan/PG-85672/2021 | EPI_ISL_3897963 | 2021-09-02      |
| hCoV-19/Japan/PG-85673/2021 | EPI_ISL_3897964 | 2021-09-02      |
| hCoV-19/Japan/PG-85674/2021 | EPI_ISL_3897965 | 2021-09-02      |
| hCoV-19/Japan/PG-85675/2021 | EPI_ISL_3897966 | 2021-09-02      |
| hCoV-19/Japan/PG-85676/2021 | EPI_ISL_3897967 | 2021-09-02      |
| hCoV-19/Japan/PG-85677/2021 | EPI_ISL_3897968 | 2021-09-02      |
| hCoV-19/Japan/PG-85678/2021 | EPI_ISL_3897969 | 2021-09-02      |
| hCoV-19/Japan/PG-85679/2021 | EPI_ISL_3897970 | 2021-09-02      |
| hCoV-19/Japan/PG-85680/2021 | EPI_ISL_3897971 | 2021-09-02      |
| hCoV-19/Japan/PG-85681/2021 | EPI_ISL_3897972 | 2021-09-02      |
| hCoV-19/Japan/PG-85682/2021 | EPI_ISL_3897973 | 2021-09-02      |
| hCoV-19/Japan/PG-85683/2021 | EPI_ISL_3897974 | 2021-09-02      |
| hCoV-19/Japan/PG-85684/2021 | EPI_ISL_3897975 | 2021-09-02      |
| hCoV-19/Japan/PG-85685/2021 | EPI_ISL_3897976 | 2021-09-02      |
| hCoV-19/Japan/PG-85686/2021 | EPI_ISL_3897977 | 2021-09-02      |

| virus_name                  | epiID           | submission_date |
|-----------------------------|-----------------|-----------------|
| hCoV-19/Japan/PG-85687/2021 | EPI_ISL_3897978 | 2021-09-02      |
| hCoV-19/Japan/PG-85688/2021 | EPI_ISL_3897979 | 2021-09-02      |
| hCoV-19/Japan/PG-85689/2021 | EPI_ISL_3897980 | 2021-09-02      |
| hCoV-19/Japan/PG-85690/2021 | EPI_ISL_3897981 | 2021-09-02      |
| hCoV-19/Japan/PG-85691/2021 | EPI_ISL_3897982 | 2021-09-02      |
| hCoV-19/Japan/PG-85692/2021 | EPI_ISL_3897983 | 2021-09-02      |
| hCoV-19/Japan/PG-85693/2021 | EPI_ISL_3897984 | 2021-09-02      |
| hCoV-19/Japan/PG-85694/2021 | EPI_ISL_3897985 | 2021-09-02      |
| hCoV-19/Japan/PG-85695/2021 | EPI_ISL_3897986 | 2021-09-02      |
| hCoV-19/Japan/PG-85696/2021 | EPI_ISL_3897987 | 2021-09-02      |
| hCoV-19/Japan/PG-85697/2021 | EPI_ISL_3897988 | 2021-09-02      |
| hCoV-19/Japan/PG-85698/2021 | EPI_ISL_3897989 | 2021-09-02      |
| hCoV-19/Japan/PG-85699/2021 | EPI_ISL_3897990 | 2021-09-02      |
| hCoV-19/Japan/PG-85700/2021 | EPI_ISL_3897991 | 2021-09-02      |
| hCoV-19/Japan/PG-85701/2021 | EPI_ISL_3897992 | 2021-09-02      |
| hCoV-19/Japan/PG-85702/2021 | EPI_ISL_3897993 | 2021-09-02      |
| hCoV-19/Japan/PG-85703/2021 | EPI_ISL_3897994 | 2021-09-02      |
| hCoV-19/Japan/PG-85704/2021 | EPI_ISL_3897995 | 2021-09-02      |
| hCoV-19/Japan/PG-85705/2021 | EPI_ISL_3897996 | 2021-09-02      |
| hCoV-19/Japan/PG-85706/2021 | EPI_ISL_3897997 | 2021-09-02      |
| hCoV-19/Japan/PG-85709/2021 | EPI_ISL_3897998 | 2021-09-02      |
| hCoV-19/Japan/PG-85710/2021 | EPI_ISL_3897999 | 2021-09-02      |
| hCoV-19/Japan/PG-85711/2021 | EPI_ISL_3898000 | 2021-09-02      |
| hCoV-19/Japan/PG-85712/2021 | EPI_ISL_3898001 | 2021-09-02      |
| hCoV-19/Japan/PG-85713/2021 | EPI_ISL_3898002 | 2021-09-02      |
| hCoV-19/Japan/PG-85714/2021 | EPI_ISL_3898003 | 2021-09-02      |
| hCoV-19/Japan/PG-85716/2021 | EPI_ISL_3898004 | 2021-09-02      |
| hCoV-19/Japan/PG-85717/2021 | EPI_ISL_3898005 | 2021-09-02      |
| hCoV-19/Japan/PG-85718/2021 | EPI_ISL_3898006 | 2021-09-02      |
| hCoV-19/Japan/PG-85719/2021 | EPI_ISL_3898007 | 2021-09-02      |
| hCoV-19/Japan/PG-85720/2021 | EPI_ISL_3898008 | 2021-09-02      |
| hCoV-19/Japan/PG-85721/2021 | EPI_ISL_3898009 | 2021-09-02      |
| hCoV-19/Japan/PG-85722/2021 | EPI_ISL_3898010 | 2021-09-02      |
| hCoV-19/Japan/PG-85723/2021 | EPI_ISL_3898011 | 2021-09-02      |
| hCoV-19/Japan/PG-85724/2021 | EPI_ISL_3898012 | 2021-09-02      |
| hCoV-19/Japan/PG-85725/2021 | EPI_ISL_3898013 | 2021-09-02      |
| hCoV-19/Japan/PG-85726/2021 | EPI_ISL_3898014 | 2021-09-02      |
| hCoV-19/Japan/PG-85727/2021 | EPI_ISL_3898015 | 2021-09-02      |
| hCoV-19/Japan/PG-85728/2021 | EPI_ISL_3898016 | 2021-09-02      |
| hCoV-19/Japan/PG-85729/2021 | EPI_ISL_3898017 | 2021-09-02      |
| hCoV-19/Japan/PG-85730/2021 | EPI_ISL_3898018 | 2021-09-02      |
| hCoV-19/Japan/PG-85731/2021 | EPI_ISL_3898019 | 2021-09-02      |
| hCoV-19/Japan/PG-85732/2021 | EPI_ISL_3898020 | 2021-09-02      |
| hCoV-19/Japan/PG-85733/2021 | EPI_ISL_3898021 | 2021-09-02      |
| hCoV-19/Japan/PG-85734/2021 | EPI_ISL_3898022 | 2021-09-02      |
| hCoV-19/Japan/PG-85742/2021 | EPI_ISL_3898023 | 2021-09-02      |
| hCoV-19/Japan/PG-85743/2021 | EPI_ISL_3898024 | 2021-09-02      |
| hCoV-19/Japan/PG-85744/2021 | EPI_ISL_3898025 | 2021-09-02      |
| hCoV-19/Japan/PG-85745/2021 | EPI_ISL_3898026 | 2021-09-02      |
| hCoV-19/Japan/PG-85746/2021 | EPI_ISL_3898027 | 2021-09-02      |
| hCoV-19/Japan/PG-85747/2021 | EPI_ISL_3898028 | 2021-09-02      |
| hCoV-19/Japan/PG-85748/2021 | EPI_ISL_3898029 | 2021-09-02      |
| hCoV-19/Japan/PG-85749/2021 | EPI_ISL_3898030 | 2021-09-02      |
| hCoV-19/Japan/PG-85750/2021 | EPI_ISL_3898031 | 2021-09-02      |

| virus_name                  | epiID           | submission_date |
|-----------------------------|-----------------|-----------------|
| hCoV-19/Japan/PG-85751/2021 | EPI_ISL_3898032 | 2021-09-02      |
| hCoV-19/Japan/PG-85752/2021 | EPI_ISL_3898033 | 2021-09-02      |
| hCoV-19/Japan/PG-85753/2021 | EPI_ISL_3898034 | 2021-09-02      |
| hCoV-19/Japan/PG-85754/2021 | EPI_ISL_3898035 | 2021-09-02      |
| hCoV-19/Japan/PG-85755/2021 | EPI_ISL_3898036 | 2021-09-02      |
| hCoV-19/Japan/PG-85756/2021 | EPI_ISL_3898037 | 2021-09-02      |
| hCoV-19/Japan/PG-85757/2021 | EPI_ISL_3898038 | 2021-09-02      |
| hCoV-19/Japan/PG-85758/2021 | EPI_ISL_3898039 | 2021-09-02      |
| hCoV-19/Japan/PG-85761/2021 | EPI_ISL_3898040 | 2021-09-02      |
| hCoV-19/Japan/PG-85762/2021 | EPI_ISL_3898041 | 2021-09-02      |
| hCoV-19/Japan/PG-85763/2021 | EPI_ISL_3898042 | 2021-09-02      |
| hCoV-19/Japan/PG-85764/2021 | EPI_ISL_3898043 | 2021-09-02      |
| hCoV-19/Japan/PG-85765/2021 | EPI_ISL_3898044 | 2021-09-02      |
| hCoV-19/Japan/PG-85766/2021 | EPI_ISL_3898045 | 2021-09-02      |
| hCoV-19/Japan/PG-85767/2021 | EPI_ISL_3898046 | 2021-09-02      |
| hCoV-19/Japan/PG-85768/2021 | EPI_ISL_3898047 | 2021-09-02      |
| hCoV-19/Japan/PG-85769/2021 | EPI_ISL_3898048 | 2021-09-02      |
| hCoV-19/Japan/PG-85770/2021 | EPI_ISL_3898049 | 2021-09-02      |
| hCoV-19/Japan/PG-85771/2021 | EPI_ISL_3898050 | 2021-09-02      |
| hCoV-19/Japan/PG-85772/2021 | EPI_ISL_3898051 | 2021-09-02      |
| hCoV-19/Japan/PG-85773/2021 | EPI_ISL_3898052 | 2021-09-02      |
| hCoV-19/Japan/PG-85774/2021 | EPI_ISL_3898053 | 2021-09-02      |
| hCoV-19/Japan/PG-85775/2021 | EPI_ISL_3898054 | 2021-09-02      |
| hCoV-19/Japan/PG-85776/2021 | EPI_ISL_3898055 | 2021-09-02      |
| hCoV-19/Japan/PG-85777/2021 | EPI_ISL_3898056 | 2021-09-02      |
| hCoV-19/Japan/PG-85778/2021 | EPI_ISL_3898057 | 2021-09-02      |
| hCoV-19/Japan/PG-85779/2021 | EPI_ISL_3898058 | 2021-09-02      |
| hCoV-19/Japan/PG-85780/2021 | EPI_ISL_3898059 | 2021-09-02      |
| hCoV-19/Japan/PG-85781/2021 | EPI_ISL_3898060 | 2021-09-02      |
| hCoV-19/Japan/PG-85782/2021 | EPI_ISL_3898061 | 2021-09-02      |
| hCoV-19/Japan/PG-85783/2021 | EPI_ISL_3898062 | 2021-09-02      |
| hCoV-19/Japan/PG-85784/2021 | EPI_ISL_3898063 | 2021-09-02      |
| hCoV-19/Japan/PG-85785/2021 | EPI_ISL_3898064 | 2021-09-02      |
| hCoV-19/Japan/PG-85786/2021 | EPI_ISL_3898065 | 2021-09-02      |
| hCoV-19/Japan/PG-85787/2021 | EPI_ISL_3898066 | 2021-09-02      |
| hCoV-19/Japan/PG-85788/2021 | EPI_ISL_3898067 | 2021-09-02      |
| hCoV-19/Japan/PG-85789/2021 | EPI_ISL_3898068 | 2021-09-02      |
| hCoV-19/Japan/PG-85790/2021 | EPI_ISL_3898069 | 2021-09-02      |
| hCoV-19/Japan/PG-85791/2021 | EPI_ISL_3898070 | 2021-09-02      |
| hCoV-19/Japan/PG-85792/2021 | EPI_ISL_3898071 | 2021-09-02      |
| hCoV-19/Japan/PG-85793/2021 | EPI_ISL_3898072 | 2021-09-02      |
| hCoV-19/Japan/PG-85794/2021 | EPI_ISL_3898073 | 2021-09-02      |
| hCoV-19/Japan/PG-85795/2021 | EPI_ISL_3898074 | 2021-09-02      |
| hCoV-19/Japan/PG-85796/2021 | EPI_ISL_3898075 | 2021-09-02      |
| hCoV-19/Japan/PG-85797/2021 | EPI_ISL_3898076 | 2021-09-02      |
| hCoV-19/Japan/PG-85798/2021 | EPI_ISL_3898077 | 2021-09-02      |
| hCoV-19/Japan/PG-85799/2021 | EPI_ISL_3898078 | 2021-09-02      |
| hCoV-19/Japan/PG-85800/2021 | EPI_ISL_3898079 | 2021-09-02      |
| hCoV-19/Japan/PG-85801/2021 | EPI_ISL_3898080 | 2021-09-02      |
| hCoV-19/Japan/PG-85802/2021 | EPI_ISL_3898081 | 2021-09-02      |
| hCoV-19/Japan/PG-85803/2021 | EPI_ISL_3898082 | 2021-09-02      |
| hCoV-19/Japan/PG-85804/2021 | EPI_ISL_3898083 | 2021-09-02      |
| hCoV-19/Japan/PG-85805/2021 | EPI_ISL_3898084 | 2021-09-02      |
| hCoV-19/Japan/PG-85806/2021 | EPI_ISL_3898085 | 2021-09-02      |

| virus_name                  | epiID           | submission_date |
|-----------------------------|-----------------|-----------------|
| hCoV-19/Japan/PG-85807/2021 | EPI_ISL_3898086 | 2021-09-02      |
| hCoV-19/Japan/PG-85808/2021 | EPI_ISL_3898087 | 2021-09-02      |
| hCoV-19/Japan/PG-85809/2021 | EPI_ISL_3898088 | 2021-09-02      |
| hCoV-19/Japan/PG-85810/2021 | EPI_ISL_3898089 | 2021-09-02      |
| hCoV-19/Japan/PG-85811/2021 | EPI_ISL_3898090 | 2021-09-02      |
| hCoV-19/Japan/PG-85812/2021 | EPI_ISL_3898091 | 2021-09-02      |
| hCoV-19/Japan/PG-85813/2021 | EPI_ISL_3898092 | 2021-09-02      |
| hCoV-19/Japan/PG-85814/2021 | EPI_ISL_3898093 | 2021-09-02      |
| hCoV-19/Japan/PG-85815/2021 | EPI_ISL_3898094 | 2021-09-02      |
| hCoV-19/Japan/PG-85816/2021 | EPI_ISL_3898095 | 2021-09-02      |
| hCoV-19/Japan/PG-85817/2021 | EPI_ISL_3898096 | 2021-09-02      |
| hCoV-19/Japan/PG-85818/2021 | EPI_ISL_3898097 | 2021-09-02      |
| hCoV-19/Japan/PG-85819/2021 | EPI_ISL_3898098 | 2021-09-02      |
| hCoV-19/Japan/PG-85820/2021 | EPI_ISL_3898099 | 2021-09-02      |
| hCoV-19/Japan/PG-85821/2021 | EPI_ISL_3898100 | 2021-09-02      |
| hCoV-19/Japan/PG-85822/2021 | EPI_ISL_3898101 | 2021-09-02      |
| hCoV-19/Japan/PG-85823/2021 | EPI_ISL_3898102 | 2021-09-02      |
| hCoV-19/Japan/PG-85824/2021 | EPI_ISL_3898103 | 2021-09-02      |
| hCoV-19/Japan/PG-85825/2021 | EPI_ISL_3898104 | 2021-09-02      |
| hCoV-19/Japan/PG-85826/2021 | EPI_ISL_3898105 | 2021-09-02      |
| hCoV-19/Japan/PG-85827/2021 | EPI_ISL_3875108 | 2021-09-02      |
| hCoV-19/Japan/PG-85828/2021 | EPI_ISL_3875109 | 2021-09-02      |
| hCoV-19/Japan/PG-85829/2021 | EPI_ISL_3875110 | 2021-09-02      |
| hCoV-19/Japan/PG-85830/2021 | EPI_ISL_3875111 | 2021-09-02      |
| hCoV-19/Japan/PG-85831/2021 | EPI_ISL_3875112 | 2021-09-02      |
| hCoV-19/Japan/PG-85832/2021 | EPI_ISL_3875113 | 2021-09-02      |
| hCoV-19/Japan/PG-85833/2021 | EPI_ISL_3875114 | 2021-09-02      |
| hCoV-19/Japan/PG-85834/2021 | EPI_ISL_3875115 | 2021-09-02      |
| hCoV-19/Japan/PG-85835/2021 | EPI_ISL_3875116 | 2021-09-02      |
| hCoV-19/Japan/PG-85836/2021 | EPI_ISL_3875117 | 2021-09-02      |
| hCoV-19/Japan/PG-85837/2021 | EPI_ISL_3875118 | 2021-09-02      |
| hCoV-19/Japan/PG-85838/2021 | EPI_ISL_3875119 | 2021-09-02      |
| hCoV-19/Japan/PG-85839/2021 | EPI_ISL_3875120 | 2021-09-02      |
| hCoV-19/Japan/PG-85840/2021 | EPI_ISL_3875121 | 2021-09-02      |
| hCoV-19/Japan/PG-85841/2021 | EPI_ISL_3875122 | 2021-09-02      |
| hCoV-19/Japan/PG-85842/2021 | EPI_ISL_3875123 | 2021-09-02      |
| hCoV-19/Japan/PG-85843/2021 | EPI_ISL_3875124 | 2021-09-02      |
| hCoV-19/Japan/PG-85844/2021 | EPI_ISL_3875125 | 2021-09-02      |
| hCoV-19/Japan/PG-85845/2021 | EPI_ISL_3875126 | 2021-09-02      |
| hCoV-19/Japan/PG-85846/2021 | EPI_ISL_3875127 | 2021-09-02      |
| hCoV-19/Japan/PG-85847/2021 | EPI_ISL_3875128 | 2021-09-02      |
| hCoV-19/Japan/PG-85848/2021 | EPI_ISL_3875129 | 2021-09-02      |
| hCoV-19/Japan/PG-85849/2021 | EPI_ISL_3875130 | 2021-09-02      |
| hCoV-19/Japan/PG-85850/2021 | EPI_ISL_3875131 | 2021-09-02      |
| hCoV-19/Japan/PG-85851/2021 | EPI_ISL_3875132 | 2021-09-02      |
| hCoV-19/Japan/PG-85852/2021 | EPI_ISL_3875133 | 2021-09-02      |
| hCoV-19/Japan/PG-85853/2021 | EPI_ISL_3875134 | 2021-09-02      |
| hCoV-19/Japan/PG-85854/2021 | EPI_ISL_3875135 | 2021-09-02      |
| hCoV-19/Japan/PG-85855/2021 | EPI_ISL_3875136 | 2021-09-02      |
| hCoV-19/Japan/PG-85856/2021 | EPI_ISL_3875137 | 2021-09-02      |
| hCoV-19/Japan/PG-85857/2021 | EPI_ISL_3875138 | 2021-09-02      |
| hCoV-19/Japan/PG-85858/2021 | EPI_ISL_3875139 | 2021-09-02      |
| hCoV-19/Japan/PG-85859/2021 | EPI_ISL_3875140 | 2021-09-02      |
| hCoV-19/Japan/PG-85860/2021 | EPI_ISL_3875141 | 2021-09-02      |

| virus_name                  | epiID           | submission_date |
|-----------------------------|-----------------|-----------------|
| hCoV-19/Japan/PG-85861/2021 | EPI_ISL_3875142 | 2021-09-02      |
| hCoV-19/Japan/PG-85862/2021 | EPI_ISL_3875143 | 2021-09-02      |
| hCoV-19/Japan/PG-85863/2021 | EPI_ISL_3875144 | 2021-09-02      |
| hCoV-19/Japan/PG-85864/2021 | EPI_ISL_3875145 | 2021-09-02      |
| hCoV-19/Japan/PG-85865/2021 | EPI_ISL_3875146 | 2021-09-02      |
| hCoV-19/Japan/PG-85866/2021 | EPI_ISL_3875147 | 2021-09-02      |
| hCoV-19/Japan/PG-85867/2021 | EPI_ISL_3875148 | 2021-09-02      |
| hCoV-19/Japan/PG-85868/2021 | EPI_ISL_3875149 | 2021-09-02      |
| hCoV-19/Japan/PG-85869/2021 | EPI_ISL_3875150 | 2021-09-02      |
| hCoV-19/Japan/PG-85870/2021 | EPI_ISL_3875151 | 2021-09-02      |
| hCoV-19/Japan/PG-85871/2021 | EPI_ISL_3875152 | 2021-09-02      |
| hCoV-19/Japan/PG-85872/2021 | EPI_ISL_3875153 | 2021-09-02      |
| hCoV-19/Japan/PG-85873/2021 | EPI_ISL_3875154 | 2021-09-02      |
| hCoV-19/Japan/PG-85874/2021 | EPI_ISL_3875155 | 2021-09-02      |
| hCoV-19/Japan/PG-85875/2021 | EPI_ISL_3875156 | 2021-09-02      |
| hCoV-19/Japan/PG-85876/2021 | EPI_ISL_3875157 | 2021-09-02      |
| hCoV-19/Japan/PG-85877/2021 | EPI_ISL_3875158 | 2021-09-02      |
| hCoV-19/Japan/PG-85878/2021 | EPI_ISL_3875159 | 2021-09-02      |
| hCoV-19/Japan/PG-85879/2021 | EPI_ISL_3875160 | 2021-09-02      |
| hCoV-19/Japan/PG-85880/2021 | EPI_ISL_3875161 | 2021-09-02      |
| hCoV-19/Japan/PG-85881/2021 | EPI_ISL_3875162 | 2021-09-02      |
| hCoV-19/Japan/PG-85882/2021 | EPI_ISL_3875163 | 2021-09-02      |
| hCoV-19/Japan/PG-85883/2021 | EPI_ISL_3875164 | 2021-09-02      |
| hCoV-19/Japan/PG-85884/2021 | EPI_ISL_3875165 | 2021-09-02      |
| hCoV-19/Japan/PG-85885/2021 | EPI_ISL_3875166 | 2021-09-02      |
| hCoV-19/Japan/PG-85886/2021 | EPI_ISL_3875167 | 2021-09-02      |
| hCoV-19/Japan/PG-85887/2021 | EPI_ISL_3875168 | 2021-09-02      |
| hCoV-19/Japan/PG-85888/2021 | EPI_ISL_3875169 | 2021-09-02      |
| hCoV-19/Japan/PG-85889/2021 | EPI_ISL_3875170 | 2021-09-02      |
| hCoV-19/Japan/PG-85890/2021 | EPI_ISL_3875171 | 2021-09-02      |
| hCoV-19/Japan/PG-85891/2021 | EPI_ISL_3875172 | 2021-09-02      |
| hCoV-19/Japan/PG-85892/2021 | EPI_ISL_3875173 | 2021-09-02      |
| hCoV-19/Japan/PG-85893/2021 | EPI_ISL_3875174 | 2021-09-02      |
| hCoV-19/Japan/PG-85894/2021 | EPI_ISL_3875175 | 2021-09-02      |
| hCoV-19/Japan/PG-85895/2021 | EPI_ISL_3875176 | 2021-09-02      |
| hCoV-19/Japan/PG-85896/2021 | EPI_ISL_3875177 | 2021-09-02      |
| hCoV-19/Japan/PG-85897/2021 | EPI_ISL_3875178 | 2021-09-02      |
| hCoV-19/Japan/PG-85898/2021 | EPI_ISL_3875179 | 2021-09-02      |
| hCoV-19/Japan/PG-85899/2021 | EPI_ISL_3875180 | 2021-09-02      |
| hCoV-19/Japan/PG-85900/2021 | EPI_ISL_3875181 | 2021-09-02      |
| hCoV-19/Japan/PG-85901/2021 | EPI_ISL_3875182 | 2021-09-02      |
| hCoV-19/Japan/PG-85902/2021 | EPI_ISL_3875183 | 2021-09-02      |
| hCoV-19/Japan/PG-85903/2021 | EPI_ISL_3875184 | 2021-09-02      |
| hCoV-19/Japan/PG-85904/2021 | EPI_ISL_3875185 | 2021-09-02      |
| hCoV-19/Japan/PG-85905/2021 | EPI_ISL_3875186 | 2021-09-02      |
| hCoV-19/Japan/PG-85906/2021 | EPI_ISL_3875187 | 2021-09-02      |
| hCoV-19/Japan/PG-85907/2021 | EPI_ISL_3875188 | 2021-09-02      |
| hCoV-19/Japan/PG-85908/2021 | EPI_ISL_3875189 | 2021-09-02      |
| hCoV-19/Japan/PG-85909/2021 | EPI_ISL_3875190 | 2021-09-02      |
| hCoV-19/Japan/PG-85910/2021 | EPI_ISL_3875191 | 2021-09-02      |
| hCoV-19/Japan/PG-85911/2021 | EPI_ISL_3875192 | 2021-09-02      |
| hCoV-19/Japan/PG-85912/2021 | EPI_ISL_3875193 | 2021-09-02      |
| hCoV-19/Japan/PG-85913/2021 | EPI_ISL_3875194 | 2021-09-02      |
| hCoV-19/Japan/PG-85914/2021 | EPI_ISL_3875195 | 2021-09-02      |

| virus_name                  | epiID           | submission_date |
|-----------------------------|-----------------|-----------------|
| hCoV-19/Japan/PG-85915/2021 | EPI_ISL_3875906 | 2021-09-02      |
| hCoV-19/Japan/PG-85916/2021 | EPI_ISL_3875907 | 2021-09-02      |
| hCoV-19/Japan/PG-85917/2021 | EPI_ISL_3875908 | 2021-09-02      |
| hCoV-19/Japan/PG-85918/2021 | EPI_ISL_3875909 | 2021-09-02      |
| hCoV-19/Japan/PG-85919/2021 | EPI_ISL_3875910 | 2021-09-02      |
| hCoV-19/Japan/PG-85920/2021 | EPI_ISL_3875911 | 2021-09-02      |
| hCoV-19/Japan/PG-85921/2021 | EPI_ISL_3875912 | 2021-09-02      |
| hCoV-19/Japan/PG-85922/2021 | EPI_ISL_3875913 | 2021-09-02      |
| hCoV-19/Japan/PG-85923/2021 | EPI_ISL_3875914 | 2021-09-02      |
| hCoV-19/Japan/PG-85924/2021 | EPI_ISL_3875915 | 2021-09-02      |
| hCoV-19/Japan/PG-85925/2021 | EPI_ISL_3875916 | 2021-09-02      |
| hCoV-19/Japan/PG-85926/2021 | EPI_ISL_3875917 | 2021-09-02      |
| hCoV-19/Japan/PG-85927/2021 | EPI_ISL_3875918 | 2021-09-02      |
| hCoV-19/Japan/PG-85928/2021 | EPI_ISL_3875919 | 2021-09-02      |
| hCoV-19/Japan/PG-85929/2021 | EPI_ISL_3875920 | 2021-09-02      |
| hCoV-19/Japan/PG-85930/2021 | EPI_ISL_3875921 | 2021-09-02      |
| hCoV-19/Japan/PG-85931/2021 | EPI_ISL_3875922 | 2021-09-02      |
| hCoV-19/Japan/PG-85932/2021 | EPI_ISL_3875923 | 2021-09-02      |
| hCoV-19/Japan/PG-85933/2021 | EPI_ISL_3875924 | 2021-09-02      |
| hCoV-19/Japan/PG-85934/2021 | EPI_ISL_3875925 | 2021-09-02      |
| hCoV-19/Japan/PG-85935/2021 | EPI_ISL_3870824 | 2021-09-02      |
| hCoV-19/Japan/PG-85936/2021 | EPI_ISL_3870825 | 2021-09-02      |
| hCoV-19/Japan/PG-85937/2021 | EPI_ISL_3870826 | 2021-09-02      |
| hCoV-19/Japan/PG-85938/2021 | EPI_ISL_3870827 | 2021-09-02      |
| hCoV-19/Japan/PG-85939/2021 | EPI_ISL_3870828 | 2021-09-02      |
| hCoV-19/Japan/PG-85940/2021 | EPI_ISL_3870829 | 2021-09-02      |
| hCoV-19/Japan/PG-85941/2021 | EPI_ISL_3870830 | 2021-09-02      |
| hCoV-19/Japan/PG-85942/2021 | EPI_ISL_3870831 | 2021-09-02      |
| hCoV-19/Japan/PG-85943/2021 | EPI_ISL_3870832 | 2021-09-02      |
| hCoV-19/Japan/PG-85944/2021 | EPI_ISL_3870833 | 2021-09-02      |
| hCoV-19/Japan/PG-85945/2021 | EPI_ISL_3870834 | 2021-09-02      |
| hCoV-19/Japan/PG-85946/2021 | EPI_ISL_3870835 | 2021-09-02      |
| hCoV-19/Japan/PG-85947/2021 | EPI_ISL_3870836 | 2021-09-02      |
| hCoV-19/Japan/PG-85948/2021 | EPI_ISL_3870837 | 2021-09-02      |
| hCoV-19/Japan/PG-85949/2021 | EPI_ISL_3870838 | 2021-09-02      |
| hCoV-19/Japan/PG-85950/2021 | EPI_ISL_3870839 | 2021-09-02      |
| hCoV-19/Japan/PG-85951/2021 | EPI_ISL_3870840 | 2021-09-02      |
| hCoV-19/Japan/PG-85952/2021 | EPI_ISL_3870841 | 2021-09-02      |
| hCoV-19/Japan/PG-85953/2021 | EPI_ISL_3873024 | 2021-09-02      |
| hCoV-19/Japan/PG-85954/2021 | EPI_ISL_3873025 | 2021-09-02      |
| hCoV-19/Japan/PG-85955/2021 | EPI_ISL_3873026 | 2021-09-02      |
| hCoV-19/Japan/PG-85956/2021 | EPI_ISL_3873027 | 2021-09-02      |
| hCoV-19/Japan/PG-85957/2021 | EPI_ISL_3873028 | 2021-09-02      |
| hCoV-19/Japan/PG-85958/2021 | EPI_ISL_3873029 | 2021-09-02      |
| hCoV-19/Japan/PG-85959/2021 | EPI_ISL_3873030 | 2021-09-02      |
| hCoV-19/Japan/PG-85960/2021 | EPI_ISL_3873031 | 2021-09-02      |
| hCoV-19/Japan/PG-85961/2021 | EPI_ISL_3873032 | 2021-09-02      |
| hCoV-19/Japan/PG-85962/2021 | EPI_ISL_3873033 | 2021-09-02      |
| hCoV-19/Japan/PG-85963/2021 | EPI_ISL_3873034 | 2021-09-02      |
| hCoV-19/Japan/PG-85964/2021 | EPI_ISL_3873035 | 2021-09-02      |
| hCoV-19/Japan/PG-85965/2021 | EPI_ISL_3873036 | 2021-09-02      |
| hCoV-19/Japan/PG-85966/2021 | EPI_ISL_3873037 | 2021-09-02      |
| hCoV-19/Japan/PG-85967/2021 | EPI_ISL_3873038 | 2021-09-02      |
| hCoV-19/Japan/PG-85968/2021 | EPI_ISL_3873039 | 2021-09-02      |



| virus_name                  | epiID           | submission_date |
|-----------------------------|-----------------|-----------------|
| hCoV-19/Japan/PG-86006/2021 | EPI_ISL_3873040 | 2021-09-02      |
| hCoV-19/Japan/PG-86007/2021 | EPI_ISL_3873041 | 2021-09-02      |
| hCoV-19/Japan/PG-86008/2021 | EPI_ISL_3873042 | 2021-09-02      |
| hCoV-19/Japan/PG-86009/2021 | EPI_ISL_3873043 | 2021-09-02      |
| hCoV-19/Japan/PG-86010/2021 | EPI_ISL_3873044 | 2021-09-02      |
| hCoV-19/Japan/PG-86011/2021 | EPI_ISL_3873045 | 2021-09-02      |
| hCoV-19/Japan/PG-86012/2021 | EPI_ISL_3873046 | 2021-09-02      |
| hCoV-19/Japan/PG-86013/2021 | EPI_ISL_3873047 | 2021-09-02      |
| hCoV-19/Japan/PG-86014/2021 | EPI_ISL_3873048 | 2021-09-02      |
| hCoV-19/Japan/PG-86015/2021 | EPI_ISL_3873049 | 2021-09-02      |
| hCoV-19/Japan/PG-86016/2021 | EPI_ISL_3873050 | 2021-09-02      |
| hCoV-19/Japan/PG-86017/2021 | EPI_ISL_3873051 | 2021-09-02      |
| hCoV-19/Japan/PG-86018/2021 | EPI_ISL_3873052 | 2021-09-02      |
| hCoV-19/Japan/PG-86019/2021 | EPI_ISL_3873053 | 2021-09-02      |
| hCoV-19/Japan/PG-86020/2021 | EPI_ISL_3873054 | 2021-09-02      |
| hCoV-19/Japan/PG-86021/2021 | EPI_ISL_3873055 | 2021-09-02      |
| hCoV-19/Japan/PG-86022/2021 | EPI_ISL_3873056 | 2021-09-02      |
| hCoV-19/Japan/PG-86023/2021 | EPI_ISL_3873057 | 2021-09-02      |
| hCoV-19/Japan/PG-86024/2021 | EPI_ISL_3873058 | 2021-09-02      |
| hCoV-19/Japan/PG-86025/2021 | EPI_ISL_3873059 | 2021-09-02      |
| hCoV-19/Japan/PG-86026/2021 | EPI_ISL_3873060 | 2021-09-02      |
| hCoV-19/Japan/PG-86027/2021 | EPI_ISL_3873061 | 2021-09-02      |
| hCoV-19/Japan/PG-86028/2021 | EPI_ISL_3873062 | 2021-09-02      |
| hCoV-19/Japan/PG-86029/2021 | EPI_ISL_3873063 | 2021-09-02      |
| hCoV-19/Japan/PG-86030/2021 | EPI_ISL_3873064 | 2021-09-02      |
| hCoV-19/Japan/PG-86031/2021 | EPI_ISL_3873065 | 2021-09-02      |
| hCoV-19/Japan/PG-86032/2021 | EPI_ISL_3873066 | 2021-09-02      |
| hCoV-19/Japan/PG-86033/2021 | EPI_ISL_3873067 | 2021-09-02      |
| hCoV-19/Japan/PG-86034/2021 | EPI_ISL_3873068 | 2021-09-02      |
| hCoV-19/Japan/PG-86035/2021 | EPI_ISL_3873069 | 2021-09-02      |
| hCoV-19/Japan/PG-86036/2021 | EPI_ISL_3873070 | 2021-09-02      |
| hCoV-19/Japan/PG-86037/2021 | EPI_ISL_3873071 | 2021-09-02      |
| hCoV-19/Japan/PG-86038/2021 | EPI_ISL_3873072 | 2021-09-02      |
| hCoV-19/Japan/PG-86039/2021 | EPI_ISL_3873073 | 2021-09-02      |
| hCoV-19/Japan/PG-86040/2021 | EPI_ISL_3873074 | 2021-09-02      |
| hCoV-19/Japan/PG-86041/2021 | EPI_ISL_3873075 | 2021-09-02      |
| hCoV-19/Japan/PG-86042/2021 | EPI_ISL_3873076 | 2021-09-02      |
| hCoV-19/Japan/PG-86043/2021 | EPI_ISL_3873077 | 2021-09-02      |
| hCoV-19/Japan/PG-86044/2021 | EPI_ISL_3873078 | 2021-09-02      |
| hCoV-19/Japan/PG-86045/2021 | EPI_ISL_3873079 | 2021-09-02      |
| hCoV-19/Japan/PG-86046/2021 | EPI_ISL_3873080 | 2021-09-02      |
| hCoV-19/Japan/PG-86047/2021 | EPI_ISL_3873081 | 2021-09-02      |
| hCoV-19/Japan/PG-86048/2021 | EPI_ISL_3873082 | 2021-09-02      |
| hCoV-19/Japan/PG-86049/2021 | EPI_ISL_3873083 | 2021-09-02      |
| hCoV-19/Japan/PG-86050/2021 | EPI_ISL_3873084 | 2021-09-02      |
| hCoV-19/Japan/PG-86051/2021 | EPI_ISL_3873085 | 2021-09-02      |
| hCoV-19/Japan/PG-86052/2021 | EPI_ISL_3873086 | 2021-09-02      |
| hCoV-19/Japan/PG-86053/2021 | EPI_ISL_3873087 | 2021-09-02      |
| hCoV-19/Japan/PG-86054/2021 | EPI_ISL_3873088 | 2021-09-02      |
| hCoV-19/Japan/PG-86055/2021 | EPI_ISL_3873089 | 2021-09-02      |
| hCoV-19/Japan/PG-86056/2021 | EPI_ISL_3873090 | 2021-09-02      |
| hCoV-19/Japan/PG-86057/2021 | EPI_ISL_3873091 | 2021-09-02      |
| hCoV-19/Japan/PG-86058/2021 | EPI_ISL_3873092 | 2021-09-02      |
| hCoV-19/Japan/PG-86059/2021 | EPI_ISL_3873093 | 2021-09-02      |

| virus_name                  | epiID           | submission_date |
|-----------------------------|-----------------|-----------------|
| hCoV-19/Japan/PG-86060/2021 | EPI_ISL_3873094 | 2021-09-02      |
| hCoV-19/Japan/PG-86061/2021 | EPI_ISL_3873095 | 2021-09-02      |
| hCoV-19/Japan/PG-86062/2021 | EPI_ISL_3873096 | 2021-09-02      |
| hCoV-19/Japan/PG-86063/2021 | EPI_ISL_3873097 | 2021-09-02      |
| hCoV-19/Japan/PG-86064/2021 | EPI_ISL_3873098 | 2021-09-02      |
| hCoV-19/Japan/PG-86065/2021 | EPI_ISL_3873099 | 2021-09-02      |
| hCoV-19/Japan/PG-86066/2021 | EPI_ISL_3873100 | 2021-09-02      |
| hCoV-19/Japan/PG-86067/2021 | EPI_ISL_3873101 | 2021-09-02      |
| hCoV-19/Japan/PG-86068/2021 | EPI_ISL_3873102 | 2021-09-02      |
| hCoV-19/Japan/PG-86069/2021 | EPI_ISL_3873103 | 2021-09-02      |
| hCoV-19/Japan/PG-86070/2021 | EPI_ISL_3873104 | 2021-09-02      |
| hCoV-19/Japan/PG-86071/2021 | EPI_ISL_3873105 | 2021-09-02      |
| hCoV-19/Japan/PG-86072/2021 | EPI_ISL_3873106 | 2021-09-02      |
| hCoV-19/Japan/PG-86073/2021 | EPI_ISL_3873107 | 2021-09-02      |
| hCoV-19/Japan/PG-86074/2021 | EPI_ISL_3873108 | 2021-09-02      |
| hCoV-19/Japan/PG-86075/2021 | EPI_ISL_3873109 | 2021-09-02      |
| hCoV-19/Japan/PG-86076/2021 | EPI_ISL_3873110 | 2021-09-02      |
| hCoV-19/Japan/PG-86077/2021 | EPI_ISL_3873111 | 2021-09-02      |
| hCoV-19/Japan/PG-86078/2021 | EPI_ISL_3873112 | 2021-09-02      |
| hCoV-19/Japan/PG-86079/2021 | EPI_ISL_3873113 | 2021-09-02      |
| hCoV-19/Japan/PG-86080/2021 | EPI_ISL_3873114 | 2021-09-02      |
| hCoV-19/Japan/PG-86081/2021 | EPI_ISL_3873115 | 2021-09-02      |
| hCoV-19/Japan/PG-86082/2021 | EPI_ISL_3873116 | 2021-09-02      |
| hCoV-19/Japan/PG-86083/2021 | EPI_ISL_3873117 | 2021-09-02      |
| hCoV-19/Japan/PG-86084/2021 | EPI_ISL_3873118 | 2021-09-02      |
| hCoV-19/Japan/PG-86085/2021 | EPI_ISL_3873119 | 2021-09-02      |
| hCoV-19/Japan/PG-86086/2021 | EPI_ISL_3873120 | 2021-09-02      |
| hCoV-19/Japan/PG-86087/2021 | EPI_ISL_3873121 | 2021-09-02      |
| hCoV-19/Japan/PG-86088/2021 | EPI_ISL_3873122 | 2021-09-02      |
| hCoV-19/Japan/PG-86089/2021 | EPI_ISL_3873123 | 2021-09-02      |
| hCoV-19/Japan/PG-86090/2021 | EPI_ISL_3873124 | 2021-09-02      |
| hCoV-19/Japan/PG-86091/2021 | EPI_ISL_3873125 | 2021-09-02      |
| hCoV-19/Japan/PG-86092/2021 | EPI_ISL_3873126 | 2021-09-02      |
| hCoV-19/Japan/PG-86093/2021 | EPI_ISL_3873127 | 2021-09-02      |
| hCoV-19/Japan/PG-86094/2021 | EPI_ISL_3873128 | 2021-09-02      |
| hCoV-19/Japan/PG-86095/2021 | EPI_ISL_3873129 | 2021-09-02      |
| hCoV-19/Japan/PG-86096/2021 | EPI_ISL_3873130 | 2021-09-02      |
| hCoV-19/Japan/PG-86097/2021 | EPI_ISL_3873131 | 2021-09-02      |
| hCoV-19/Japan/PG-86098/2021 | EPI_ISL_3873132 | 2021-09-02      |
| hCoV-19/Japan/PG-86099/2021 | EPI_ISL_3873133 | 2021-09-02      |
| hCoV-19/Japan/PG-86100/2021 | EPI_ISL_3873134 | 2021-09-02      |
| hCoV-19/Japan/PG-86101/2021 | EPI_ISL_3873135 | 2021-09-02      |
| hCoV-19/Japan/PG-86102/2021 | EPI_ISL_3873136 | 2021-09-02      |
| hCoV-19/Japan/PG-86103/2021 | EPI_ISL_3873137 | 2021-09-02      |
| hCoV-19/Japan/PG-86104/2021 | EPI_ISL_3873138 | 2021-09-02      |
| hCoV-19/Japan/PG-86105/2021 | EPI_ISL_3873139 | 2021-09-02      |
| hCoV-19/Japan/PG-86106/2021 | EPI_ISL_3873140 | 2021-09-02      |
| hCoV-19/Japan/PG-86107/2021 | EPI_ISL_3873141 | 2021-09-02      |
| hCoV-19/Japan/PG-86108/2021 | EPI_ISL_3873142 | 2021-09-02      |
| hCoV-19/Japan/PG-86109/2021 | EPI_ISL_3873143 | 2021-09-02      |
| hCoV-19/Japan/PG-86110/2021 | EPI_ISL_3873144 | 2021-09-02      |
| hCoV-19/Japan/PG-86111/2021 | EPI_ISL_3873145 | 2021-09-02      |
| hCoV-19/Japan/PG-86112/2021 | EPI_ISL_3873146 | 2021-09-02      |
| hCoV-19/Japan/PG-86113/2021 | EPI_ISL_3873147 | 2021-09-02      |

| virus_name                  | epiID           | submission_date |
|-----------------------------|-----------------|-----------------|
| hCoV-19/Japan/PG-86114/2021 | EPI_ISL_3873148 | 2021-09-02      |
| hCoV-19/Japan/PG-86115/2021 | EPI_ISL_3873149 | 2021-09-02      |
| hCoV-19/Japan/PG-86116/2021 | EPI_ISL_3873150 | 2021-09-02      |
| hCoV-19/Japan/PG-86117/2021 | EPI_ISL_3873151 | 2021-09-02      |
| hCoV-19/Japan/PG-86118/2021 | EPI_ISL_3873152 | 2021-09-02      |
| hCoV-19/Japan/PG-86119/2021 | EPI_ISL_3873153 | 2021-09-02      |
| hCoV-19/Japan/PG-86120/2021 | EPI_ISL_3871523 | 2021-09-02      |
| hCoV-19/Japan/PG-86121/2021 | EPI_ISL_3871524 | 2021-09-02      |
| hCoV-19/Japan/PG-86122/2021 | EPI_ISL_3871525 | 2021-09-02      |
| hCoV-19/Japan/PG-86123/2021 | EPI_ISL_3871526 | 2021-09-02      |
| hCoV-19/Japan/PG-86124/2021 | EPI_ISL_3871527 | 2021-09-02      |
| hCoV-19/Japan/PG-86125/2021 | EPI_ISL_3871528 | 2021-09-02      |
| hCoV-19/Japan/PG-86126/2021 | EPI_ISL_3871529 | 2021-09-02      |
| hCoV-19/Japan/PG-86127/2021 | EPI_ISL_3871530 | 2021-09-02      |
| hCoV-19/Japan/PG-86128/2021 | EPI_ISL_3871531 | 2021-09-02      |
| hCoV-19/Japan/PG-86129/2021 | EPI_ISL_3871532 | 2021-09-02      |
| hCoV-19/Japan/PG-86130/2021 | EPI_ISL_3871533 | 2021-09-02      |
| hCoV-19/Japan/PG-86131/2021 | EPI_ISL_3871534 | 2021-09-02      |
| hCoV-19/Japan/PG-86132/2021 | EPI_ISL_3871535 | 2021-09-02      |
| hCoV-19/Japan/PG-86133/2021 | EPI_ISL_3871536 | 2021-09-02      |
| hCoV-19/Japan/PG-86134/2021 | EPI_ISL_3871537 | 2021-09-02      |
| hCoV-19/Japan/PG-86135/2021 | EPI_ISL_3871538 | 2021-09-02      |
| hCoV-19/Japan/PG-86136/2021 | EPI_ISL_3871539 | 2021-09-02      |
| hCoV-19/Japan/PG-86137/2021 | EPI_ISL_3871540 | 2021-09-02      |
| hCoV-19/Japan/PG-86138/2021 | EPI_ISL_3871541 | 2021-09-02      |
| hCoV-19/Japan/PG-86139/2021 | EPI_ISL_3871542 | 2021-09-02      |
| hCoV-19/Japan/PG-86140/2021 | EPI_ISL_3871543 | 2021-09-02      |
| hCoV-19/Japan/PG-86141/2021 | EPI_ISL_3871090 | 2021-09-02      |
| hCoV-19/Japan/PG-86142/2021 | EPI_ISL_3871091 | 2021-09-02      |
| hCoV-19/Japan/PG-86143/2021 | EPI_ISL_3871092 | 2021-09-02      |
| hCoV-19/Japan/PG-86144/2021 | EPI_ISL_3871093 | 2021-09-02      |
| hCoV-19/Japan/PG-86145/2021 | EPI_ISL_3871094 | 2021-09-02      |
| hCoV-19/Japan/PG-86146/2021 | EPI_ISL_3871095 | 2021-09-02      |
| hCoV-19/Japan/PG-86147/2021 | EPI_ISL_3871096 | 2021-09-02      |
| hCoV-19/Japan/PG-86148/2021 | EPI_ISL_3871097 | 2021-09-02      |
| hCoV-19/Japan/PG-86149/2021 | EPI_ISL_3871098 | 2021-09-02      |
| hCoV-19/Japan/PG-86150/2021 | EPI_ISL_3871099 | 2021-09-02      |
| hCoV-19/Japan/PG-86151/2021 | EPI_ISL_3871100 | 2021-09-02      |
| hCoV-19/Japan/PG-86152/2021 | EPI_ISL_3871101 | 2021-09-02      |
| hCoV-19/Japan/PG-86153/2021 | EPI_ISL_3871102 | 2021-09-02      |
| hCoV-19/Japan/PG-86154/2021 | EPI_ISL_3871103 | 2021-09-02      |
| hCoV-19/Japan/PG-86155/2021 | EPI_ISL_3871104 | 2021-09-02      |
| hCoV-19/Japan/PG-86156/2021 | EPI_ISL_3871105 | 2021-09-02      |
| hCoV-19/Japan/PG-86157/2021 | EPI_ISL_3871106 | 2021-09-02      |
| hCoV-19/Japan/PG-86158/2021 | EPI_ISL_3871107 | 2021-09-02      |
| hCoV-19/Japan/PG-86159/2021 | EPI_ISL_3871108 | 2021-09-02      |
| hCoV-19/Japan/PG-86160/2021 | EPI_ISL_3871109 | 2021-09-02      |
| hCoV-19/Japan/PG-86161/2021 | EPI_ISL_3871314 | 2021-09-02      |
| hCoV-19/Japan/PG-86162/2021 | EPI_ISL_3871315 | 2021-09-02      |
| hCoV-19/Japan/PG-86163/2021 | EPI_ISL_3871316 | 2021-09-02      |
| hCoV-19/Japan/PG-86164/2021 | EPI_ISL_3871317 | 2021-09-02      |
| hCoV-19/Japan/PG-86165/2021 | EPI_ISL_3871318 | 2021-09-02      |
| hCoV-19/Japan/PG-86166/2021 | EPI_ISL_3871319 | 2021-09-02      |
| hCoV-19/Japan/PG-86167/2021 | EPI_ISL_3871320 | 2021-09-02      |

| virus_name                  | epiID           | submission_date |
|-----------------------------|-----------------|-----------------|
| hCoV-19/Japan/PG-86168/2021 | EPI_ISL_3871321 | 2021-09-02      |
| hCoV-19/Japan/PG-86169/2021 | EPI_ISL_3871322 | 2021-09-02      |
| hCoV-19/Japan/PG-86170/2021 | EPI_ISL_3871323 | 2021-09-02      |
| hCoV-19/Japan/PG-86171/2021 | EPI_ISL_3871324 | 2021-09-02      |
| hCoV-19/Japan/PG-86172/2021 | EPI_ISL_3871325 | 2021-09-02      |
| hCoV-19/Japan/PG-86173/2021 | EPI_ISL_3871326 | 2021-09-02      |
| hCoV-19/Japan/PG-86174/2021 | EPI_ISL_3871327 | 2021-09-02      |
| hCoV-19/Japan/PG-86175/2021 | EPI_ISL_3871328 | 2021-09-02      |
| hCoV-19/Japan/PG-86176/2021 | EPI_ISL_3871329 | 2021-09-02      |
| hCoV-19/Japan/PG-86177/2021 | EPI_ISL_3871330 | 2021-09-02      |
| hCoV-19/Japan/PG-86178/2021 | EPI_ISL_3871331 | 2021-09-02      |
| hCoV-19/Japan/PG-86179/2021 | EPI_ISL_3871332 | 2021-09-02      |
| hCoV-19/Japan/PG-86180/2021 | EPI_ISL_3871333 | 2021-09-02      |
| hCoV-19/Japan/PG-86181/2021 | EPI_ISL_3871334 | 2021-09-02      |
| hCoV-19/Japan/PG-86182/2021 | EPI_ISL_3871335 | 2021-09-02      |
| hCoV-19/Japan/PG-86183/2021 | EPI_ISL_3874037 | 2021-09-02      |
| hCoV-19/Japan/PG-86184/2021 | EPI_ISL_3874038 | 2021-09-02      |
| hCoV-19/Japan/PG-86185/2021 | EPI_ISL_3874039 | 2021-09-02      |
| hCoV-19/Japan/PG-86186/2021 | EPI_ISL_3874040 | 2021-09-02      |
| hCoV-19/Japan/PG-86187/2021 | EPI_ISL_3874041 | 2021-09-02      |
| hCoV-19/Japan/PG-86188/2021 | EPI_ISL_3874042 | 2021-09-02      |
| hCoV-19/Japan/PG-86189/2021 | EPI_ISL_3874043 | 2021-09-02      |
| hCoV-19/Japan/PG-86190/2021 | EPI_ISL_3874044 | 2021-09-02      |
| hCoV-19/Japan/PG-86191/2021 | EPI_ISL_3874045 | 2021-09-02      |
| hCoV-19/Japan/PG-86192/2021 | EPI_ISL_3874046 | 2021-09-02      |
| hCoV-19/Japan/PG-86193/2021 | EPI_ISL_3874047 | 2021-09-02      |
| hCoV-19/Japan/PG-86194/2021 | EPI_ISL_3874048 | 2021-09-02      |
| hCoV-19/Japan/PG-86195/2021 | EPI_ISL_3874049 | 2021-09-02      |
| hCoV-19/Japan/PG-86196/2021 | EPI_ISL_3874050 | 2021-09-02      |
| hCoV-19/Japan/PG-86197/2021 | EPI_ISL_3874051 | 2021-09-02      |
| hCoV-19/Japan/PG-86198/2021 | EPI_ISL_3874052 | 2021-09-02      |
| hCoV-19/Japan/PG-86199/2021 | EPI_ISL_3874053 | 2021-09-02      |
| hCoV-19/Japan/PG-86200/2021 | EPI_ISL_3874054 | 2021-09-02      |
| hCoV-19/Japan/PG-86201/2021 | EPI_ISL_3874055 | 2021-09-02      |
| hCoV-19/Japan/PG-86202/2021 | EPI_ISL_3874056 | 2021-09-02      |
| hCoV-19/Japan/PG-86203/2021 | EPI_ISL_3874057 | 2021-09-02      |
| hCoV-19/Japan/PG-86204/2021 | EPI_ISL_3874058 | 2021-09-02      |
| hCoV-19/Japan/PG-86205/2021 | EPI_ISL_3874059 | 2021-09-02      |
| hCoV-19/Japan/PG-86206/2021 | EPI_ISL_3874060 | 2021-09-02      |
| hCoV-19/Japan/PG-86207/2021 | EPI_ISL_3874061 | 2021-09-02      |
| hCoV-19/Japan/PG-86208/2021 | EPI_ISL_3874062 | 2021-09-02      |
| hCoV-19/Japan/PG-86209/2021 | EPI_ISL_3874063 | 2021-09-02      |
| hCoV-19/Japan/PG-86210/2021 | EPI_ISL_3874064 | 2021-09-02      |
| hCoV-19/Japan/PG-86212/2021 | EPI_ISL_3874065 | 2021-09-02      |
| hCoV-19/Japan/PG-86213/2021 | EPI_ISL_3870468 | 2021-09-02      |
| hCoV-19/Japan/PG-86214/2021 | EPI_ISL_3870469 | 2021-09-02      |
| hCoV-19/Japan/PG-86215/2021 | EPI_ISL_3870470 | 2021-09-02      |
| hCoV-19/Japan/PG-86216/2021 | EPI_ISL_3870471 | 2021-09-02      |
| hCoV-19/Japan/PG-86217/2021 | EPI_ISL_3870472 | 2021-09-02      |
| hCoV-19/Japan/PG-86218/2021 | EPI_ISL_3870473 | 2021-09-02      |
| hCoV-19/Japan/PG-86219/2021 | EPI_ISL_3870474 | 2021-09-02      |
| hCoV-19/Japan/PG-86220/2021 | EPI_ISL_3870475 | 2021-09-02      |
| hCoV-19/Japan/PG-86221/2021 | EPI_ISL_3870476 | 2021-09-02      |
| hCoV-19/Japan/PG-86222/2021 | EPI_ISL_3870477 | 2021-09-02      |

| virus_name                  | epiID           | submission_date |
|-----------------------------|-----------------|-----------------|
| hCoV-19/Japan/PG-86223/2021 | EPI_ISL_3870478 | 2021-09-02      |
| hCoV-19/Japan/PG-86224/2021 | EPI_ISL_3870479 | 2021-09-02      |
| hCoV-19/Japan/PG-86225/2021 | EPI_ISL_3870480 | 2021-09-02      |
| hCoV-19/Japan/PG-86226/2021 | EPI_ISL_3870481 | 2021-09-02      |
| hCoV-19/Japan/PG-86227/2021 | EPI_ISL_3870482 | 2021-09-02      |
| hCoV-19/Japan/PG-86232/2021 | EPI_ISL_3874235 | 2021-09-02      |
| hCoV-19/Japan/PG-86233/2021 | EPI_ISL_3874236 | 2021-09-02      |
| hCoV-19/Japan/PG-86234/2021 | EPI_ISL_3874237 | 2021-09-02      |
| hCoV-19/Japan/PG-86236/2021 | EPI_ISL_3874238 | 2021-09-02      |
| hCoV-19/Japan/PG-86237/2021 | EPI_ISL_3874239 | 2021-09-02      |
| hCoV-19/Japan/PG-86238/2021 | EPI_ISL_3874240 | 2021-09-02      |
| hCoV-19/Japan/PG-86239/2021 | EPI_ISL_3874241 | 2021-09-02      |
| hCoV-19/Japan/PG-86240/2021 | EPI_ISL_3874242 | 2021-09-02      |
| hCoV-19/Japan/PG-86241/2021 | EPI_ISL_3874243 | 2021-09-02      |
| hCoV-19/Japan/PG-86243/2021 | EPI_ISL_3874244 | 2021-09-02      |
| hCoV-19/Japan/PG-86244/2021 | EPI_ISL_3874245 | 2021-09-02      |
| hCoV-19/Japan/PG-86245/2021 | EPI_ISL_3874246 | 2021-09-02      |
| hCoV-19/Japan/PG-86246/2021 | EPI_ISL_3874247 | 2021-09-02      |
| hCoV-19/Japan/PG-86247/2021 | EPI_ISL_3874248 | 2021-09-02      |
| hCoV-19/Japan/PG-86248/2021 | EPI_ISL_3874249 | 2021-09-02      |
| hCoV-19/Japan/PG-86249/2021 | EPI_ISL_3872197 | 2021-09-02      |
| hCoV-19/Japan/PG-86251/2021 | EPI_ISL_3872198 | 2021-09-02      |
| hCoV-19/Japan/PG-86252/2021 | EPI_ISL_3872199 | 2021-09-02      |
| hCoV-19/Japan/PG-86253/2021 | EPI_ISL_3872200 | 2021-09-02      |
| hCoV-19/Japan/PG-86254/2021 | EPI_ISL_3872201 | 2021-09-02      |
| hCoV-19/Japan/PG-86255/2021 | EPI_ISL_3872202 | 2021-09-02      |
| hCoV-19/Japan/PG-86256/2021 | EPI_ISL_3872203 | 2021-09-02      |
| hCoV-19/Japan/PG-86258/2021 | EPI_ISL_3872204 | 2021-09-02      |
| hCoV-19/Japan/PG-86259/2021 | EPI_ISL_3872205 | 2021-09-02      |
| hCoV-19/Japan/PG-86260/2021 | EPI_ISL_3872206 | 2021-09-02      |
| hCoV-19/Japan/PG-86261/2021 | EPI_ISL_3872207 | 2021-09-02      |
| hCoV-19/Japan/PG-86262/2021 | EPI_ISL_3872208 | 2021-09-02      |
| hCoV-19/Japan/PG-86263/2021 | EPI_ISL_3872209 | 2021-09-02      |
| hCoV-19/Japan/PG-86264/2021 | EPI_ISL_3872210 | 2021-09-02      |
| hCoV-19/Japan/PG-86265/2021 | EPI_ISL_3872211 | 2021-09-02      |
| hCoV-19/Japan/PG-86266/2021 | EPI_ISL_3872212 | 2021-09-02      |
| hCoV-19/Japan/PG-86267/2021 | EPI_ISL_3872213 | 2021-09-02      |
| hCoV-19/Japan/PG-86268/2021 | EPI_ISL_3872214 | 2021-09-02      |
| hCoV-19/Japan/PG-86269/2021 | EPI_ISL_3872215 | 2021-09-02      |
| hCoV-19/Japan/PG-86270/2021 | EPI_ISL_3872216 | 2021-09-02      |
| hCoV-19/Japan/PG-86273/2021 | EPI_ISL_3872312 | 2021-09-02      |
| hCoV-19/Japan/PG-86274/2021 | EPI_ISL_3872313 | 2021-09-02      |
| hCoV-19/Japan/PG-86275/2021 | EPI_ISL_3872314 | 2021-09-02      |
| hCoV-19/Japan/PG-86276/2021 | EPI_ISL_3872315 | 2021-09-02      |
| hCoV-19/Japan/PG-86277/2021 | EPI_ISL_3872316 | 2021-09-02      |
| hCoV-19/Japan/PG-86278/2021 | EPI_ISL_3872317 | 2021-09-02      |
| hCoV-19/Japan/PG-86279/2021 | EPI_ISL_3872318 | 2021-09-02      |
| hCoV-19/Japan/PG-86280/2021 | EPI_ISL_3872319 | 2021-09-02      |
| hCoV-19/Japan/PG-86281/2021 | EPI_ISL_3872320 | 2021-09-02      |
| hCoV-19/Japan/PG-86282/2021 | EPI_ISL_3872321 | 2021-09-02      |
| hCoV-19/Japan/PG-86283/2021 | EPI_ISL_3872322 | 2021-09-02      |
| hCoV-19/Japan/PG-86284/2021 | EPI_ISL_3872323 | 2021-09-02      |
| hCoV-19/Japan/PG-86285/2021 | EPI_ISL_3872324 | 2021-09-02      |
| hCoV-19/Japan/PG-86286/2021 | EPI_ISL_3872325 | 2021-09-02      |

| virus_name                  | epiID           | submission_date |
|-----------------------------|-----------------|-----------------|
| hCoV-19/Japan/PG-86287/2021 | EPI_ISL_3872326 | 2021-09-02      |
| hCoV-19/Japan/PG-86288/2021 | EPI_ISL_3872327 | 2021-09-02      |
| hCoV-19/Japan/PG-86289/2021 | EPI_ISL_3872328 | 2021-09-02      |
| hCoV-19/Japan/PG-86290/2021 | EPI_ISL_3871846 | 2021-09-02      |
| hCoV-19/Japan/PG-86291/2021 | EPI_ISL_3871847 | 2021-09-02      |
| hCoV-19/Japan/PG-86292/2021 | EPI_ISL_3871848 | 2021-09-02      |
| hCoV-19/Japan/PG-86293/2021 | EPI_ISL_3871849 | 2021-09-02      |
| hCoV-19/Japan/PG-86294/2021 | EPI_ISL_3871850 | 2021-09-02      |
| hCoV-19/Japan/PG-86295/2021 | EPI_ISL_3871851 | 2021-09-02      |
| hCoV-19/Japan/PG-86298/2021 | EPI_ISL_3871852 | 2021-09-02      |
| hCoV-19/Japan/PG-86299/2021 | EPI_ISL_3871853 | 2021-09-02      |
| hCoV-19/Japan/PG-86300/2021 | EPI_ISL_3871854 | 2021-09-02      |
| hCoV-19/Japan/PG-86301/2021 | EPI_ISL_3871855 | 2021-09-02      |
| hCoV-19/Japan/PG-86302/2021 | EPI_ISL_3871856 | 2021-09-02      |
| hCoV-19/Japan/PG-86303/2021 | EPI_ISL_3871857 | 2021-09-02      |
| hCoV-19/Japan/PG-86304/2021 | EPI_ISL_3871858 | 2021-09-02      |
| hCoV-19/Japan/PG-86305/2021 | EPI_ISL_3871859 | 2021-09-02      |
| hCoV-19/Japan/PG-86306/2021 | EPI_ISL_3871860 | 2021-09-02      |
| hCoV-19/Japan/PG-86307/2021 | EPI_ISL_3871861 | 2021-09-02      |
| hCoV-19/Japan/PG-86308/2021 | EPI_ISL_3871862 | 2021-09-02      |
| hCoV-19/Japan/PG-86309/2021 | EPI_ISL_3871863 | 2021-09-02      |
| hCoV-19/Japan/PG-86310/2021 | EPI_ISL_3871864 | 2021-09-02      |
| hCoV-19/Japan/PG-86311/2021 | EPI_ISL_3871865 | 2021-09-02      |
| hCoV-19/Japan/PG-86312/2021 | EPI_ISL_3871866 | 2021-09-02      |
| hCoV-19/Japan/PG-86314/2021 | EPI_ISL_3871900 | 2021-09-02      |
| hCoV-19/Japan/PG-86315/2021 | EPI_ISL_3871901 | 2021-09-02      |
| hCoV-19/Japan/PG-86316/2021 | EPI_ISL_3871902 | 2021-09-02      |
| hCoV-19/Japan/PG-86317/2021 | EPI_ISL_3871903 | 2021-09-02      |
| hCoV-19/Japan/PG-86318/2021 | EPI_ISL_3871904 | 2021-09-02      |
| hCoV-19/Japan/PG-86319/2021 | EPI_ISL_3871905 | 2021-09-02      |
| hCoV-19/Japan/PG-86320/2021 | EPI_ISL_3871906 | 2021-09-02      |
| hCoV-19/Japan/PG-86321/2021 | EPI_ISL_3871907 | 2021-09-02      |
| hCoV-19/Japan/PG-86322/2021 | EPI_ISL_3871908 | 2021-09-02      |
| hCoV-19/Japan/PG-86323/2021 | EPI_ISL_3871909 | 2021-09-02      |
| hCoV-19/Japan/PG-86324/2021 | EPI_ISL_3871910 | 2021-09-02      |
| hCoV-19/Japan/PG-86325/2021 | EPI_ISL_3871911 | 2021-09-02      |
| hCoV-19/Japan/PG-86326/2021 | EPI_ISL_3871912 | 2021-09-02      |
| hCoV-19/Japan/PG-86327/2021 | EPI_ISL_3871913 | 2021-09-02      |
| hCoV-19/Japan/PG-86328/2021 | EPI_ISL_3871914 | 2021-09-02      |
| hCoV-19/Japan/PG-86329/2021 | EPI_ISL_3871915 | 2021-09-02      |
| hCoV-19/Japan/PG-86330/2021 | EPI_ISL_3871916 | 2021-09-02      |
| hCoV-19/Japan/PG-86331/2021 | EPI_ISL_3871917 | 2021-09-02      |
| hCoV-19/Japan/PG-86332/2021 | EPI_ISL_3871918 | 2021-09-02      |
| hCoV-19/Japan/PG-86333/2021 | EPI_ISL_3871919 | 2021-09-02      |
| hCoV-19/Japan/PG-86334/2021 | EPI_ISL_3871920 | 2021-09-02      |
| hCoV-19/Japan/PG-86335/2021 | EPI_ISL_3871921 | 2021-09-02      |
| hCoV-19/Japan/PG-86336/2021 | EPI_ISL_3871922 | 2021-09-02      |
| hCoV-19/Japan/PG-86337/2021 | EPI_ISL_3871923 | 2021-09-02      |
| hCoV-19/Japan/PG-86338/2021 | EPI_ISL_3871924 | 2021-09-02      |
| hCoV-19/Japan/PG-86339/2021 | EPI_ISL_3871925 | 2021-09-02      |
| hCoV-19/Japan/PG-86340/2021 | EPI_ISL_3871926 | 2021-09-02      |
| hCoV-19/Japan/PG-86341/2021 | EPI_ISL_3871927 | 2021-09-02      |
| hCoV-19/Japan/PG-86342/2021 | EPI_ISL_3871928 | 2021-09-02      |
| hCoV-19/Japan/PG-86343/2021 | EPI_ISL_3871929 | 2021-09-02      |

| virus_name                  | epiID           | submission_date |
|-----------------------------|-----------------|-----------------|
| hCoV-19/Japan/PG-86344/2021 | EPI_ISL_3871930 | 2021-09-02      |
| hCoV-19/Japan/PG-86345/2021 | EPI_ISL_3871931 | 2021-09-02      |
| hCoV-19/Japan/PG-86346/2021 | EPI_ISL_3871932 | 2021-09-02      |
| hCoV-19/Japan/PG-86347/2021 | EPI_ISL_3871933 | 2021-09-02      |
| hCoV-19/Japan/PG-86348/2021 | EPI_ISL_3871934 | 2021-09-02      |
| hCoV-19/Japan/PG-86349/2021 | EPI_ISL_3871935 | 2021-09-02      |
| hCoV-19/Japan/PG-86350/2021 | EPI_ISL_3871936 | 2021-09-02      |
| hCoV-19/Japan/PG-86351/2021 | EPI_ISL_3871937 | 2021-09-02      |
| hCoV-19/Japan/PG-86352/2021 | EPI_ISL_3871938 | 2021-09-02      |
| hCoV-19/Japan/PG-86353/2021 | EPI_ISL_3871939 | 2021-09-02      |
| hCoV-19/Japan/PG-86354/2021 | EPI_ISL_3871940 | 2021-09-02      |
| hCoV-19/Japan/PG-86355/2021 | EPI_ISL_3871941 | 2021-09-02      |
| hCoV-19/Japan/PG-86356/2021 | EPI_ISL_3871942 | 2021-09-02      |
| hCoV-19/Japan/PG-86357/2021 | EPI_ISL_3871943 | 2021-09-02      |
| hCoV-19/Japan/PG-86358/2021 | EPI_ISL_3871944 | 2021-09-02      |
| hCoV-19/Japan/PG-86359/2021 | EPI_ISL_3871945 | 2021-09-02      |
| hCoV-19/Japan/PG-86360/2021 | EPI_ISL_3871946 | 2021-09-02      |
| hCoV-19/Japan/PG-86361/2021 | EPI_ISL_3871947 | 2021-09-02      |
| hCoV-19/Japan/PG-86362/2021 | EPI_ISL_3873415 | 2021-09-02      |
| hCoV-19/Japan/PG-86363/2021 | EPI_ISL_3873416 | 2021-09-02      |
| hCoV-19/Japan/PG-86364/2021 | EPI_ISL_3873417 | 2021-09-02      |
| hCoV-19/Japan/PG-86376/2021 | EPI_ISL_3873418 | 2021-09-02      |
| hCoV-19/Japan/PG-86377/2021 | EPI_ISL_3873419 | 2021-09-02      |
| hCoV-19/Japan/PG-86378/2021 | EPI_ISL_3873420 | 2021-09-02      |
| hCoV-19/Japan/PG-86379/2021 | EPI_ISL_3873421 | 2021-09-02      |
| hCoV-19/Japan/PG-86380/2021 | EPI_ISL_3873422 | 2021-09-02      |
| hCoV-19/Japan/PG-86385/2021 | EPI_ISL_3874250 | 2021-09-02      |
| hCoV-19/Japan/PG-86386/2021 | EPI_ISL_3872329 | 2021-09-02      |
| hCoV-19/Japan/PG-86387/2021 | EPI_ISL_3872330 | 2021-09-02      |
| hCoV-19/Japan/PG-86388/2021 | EPI_ISL_3872331 | 2021-09-02      |
| hCoV-19/Japan/PG-86389/2021 | EPI_ISL_3872332 | 2021-09-02      |
| hCoV-19/Japan/PG-86390/2021 | EPI_ISL_3872333 | 2021-09-02      |
| hCoV-19/Japan/PG-86391/2021 | EPI_ISL_3898106 | 2021-09-02      |
| hCoV-19/Japan/PG-86392/2021 | EPI_ISL_3898107 | 2021-09-02      |
| hCoV-19/Japan/PG-86393/2021 | EPI_ISL_3898108 | 2021-09-02      |
| hCoV-19/Japan/PG-86394/2021 | EPI_ISL_3898109 | 2021-09-02      |
| hCoV-19/Japan/PG-86395/2021 | EPI_ISL_3898110 | 2021-09-02      |
| hCoV-19/Japan/PG-86396/2021 | EPI_ISL_3898111 | 2021-09-02      |
| hCoV-19/Japan/PG-86397/2021 | EPI_ISL_3898112 | 2021-09-02      |
| hCoV-19/Japan/PG-86398/2021 | EPI_ISL_3898113 | 2021-09-02      |
| hCoV-19/Japan/PG-86399/2021 | EPI_ISL_3898114 | 2021-09-02      |
| hCoV-19/Japan/PG-86400/2021 | EPI_ISL_3898115 | 2021-09-02      |
| hCoV-19/Japan/PG-86401/2021 | EPI_ISL_3898116 | 2021-09-02      |
| hCoV-19/Japan/PG-86402/2021 | EPI_ISL_3898117 | 2021-09-02      |
| hCoV-19/Japan/PG-86403/2021 | EPI_ISL_3898118 | 2021-09-02      |
| hCoV-19/Japan/PG-86404/2021 | EPI_ISL_3898119 | 2021-09-02      |
| hCoV-19/Japan/PG-86405/2021 | EPI_ISL_3898120 | 2021-09-02      |
| hCoV-19/Japan/PG-86406/2021 | EPI_ISL_3898121 | 2021-09-02      |
| hCoV-19/Japan/PG-86407/2021 | EPI_ISL_3898122 | 2021-09-02      |
| hCoV-19/Japan/PG-86408/2021 | EPI_ISL_3898123 | 2021-09-02      |
| hCoV-19/Japan/PG-86409/2021 | EPI_ISL_3898124 | 2021-09-02      |
| hCoV-19/Japan/PG-86410/2021 | EPI_ISL_3898125 | 2021-09-02      |
| hCoV-19/Japan/PG-86411/2021 | EPI_ISL_3898126 | 2021-09-02      |
| hCoV-19/Japan/PG-86412/2021 | EPI_ISL_3898127 | 2021-09-02      |

| virus_name                  | epiID           | submission_date |
|-----------------------------|-----------------|-----------------|
| hCoV-19/Japan/PG-86413/2021 | EPI_ISL_3898128 | 2021-09-02      |
| hCoV-19/Japan/PG-86414/2021 | EPI_ISL_3898129 | 2021-09-02      |
| hCoV-19/Japan/PG-86415/2021 | EPI_ISL_3898130 | 2021-09-02      |
| hCoV-19/Japan/PG-86416/2021 | EPI_ISL_3898131 | 2021-09-02      |
| hCoV-19/Japan/PG-86417/2021 | EPI_ISL_3898132 | 2021-09-02      |
| hCoV-19/Japan/PG-86418/2021 | EPI_ISL_3898133 | 2021-09-02      |
| hCoV-19/Japan/PG-86419/2021 | EPI_ISL_3898134 | 2021-09-02      |
| hCoV-19/Japan/PG-86420/2021 | EPI_ISL_3898135 | 2021-09-02      |
| hCoV-19/Japan/PG-86421/2021 | EPI_ISL_3898136 | 2021-09-02      |
| hCoV-19/Japan/PG-86422/2021 | EPI_ISL_3898137 | 2021-09-02      |
| hCoV-19/Japan/PG-86423/2021 | EPI_ISL_3898138 | 2021-09-02      |
| hCoV-19/Japan/PG-86424/2021 | EPI_ISL_3898139 | 2021-09-02      |
| hCoV-19/Japan/PG-86425/2021 | EPI_ISL_3898140 | 2021-09-02      |
| hCoV-19/Japan/PG-86426/2021 | EPI_ISL_3898141 | 2021-09-02      |
| hCoV-19/Japan/PG-86427/2021 | EPI_ISL_3898142 | 2021-09-02      |
| hCoV-19/Japan/PG-86428/2021 | EPI_ISL_3898143 | 2021-09-02      |
| hCoV-19/Japan/PG-86429/2021 | EPI_ISL_3898144 | 2021-09-02      |
| hCoV-19/Japan/PG-86430/2021 | EPI_ISL_3898145 | 2021-09-02      |
| hCoV-19/Japan/PG-86431/2021 | EPI_ISL_3898146 | 2021-09-02      |
| hCoV-19/Japan/PG-86432/2021 | EPI_ISL_3898147 | 2021-09-02      |
| hCoV-19/Japan/PG-86433/2021 | EPI_ISL_3898148 | 2021-09-02      |
| hCoV-19/Japan/PG-86434/2021 | EPI_ISL_3898149 | 2021-09-02      |
| hCoV-19/Japan/PG-86435/2021 | EPI_ISL_3898150 | 2021-09-02      |
| hCoV-19/Japan/PG-86436/2021 | EPI_ISL_3898151 | 2021-09-02      |
| hCoV-19/Japan/PG-86437/2021 | EPI_ISL_3898152 | 2021-09-02      |
| hCoV-19/Japan/PG-86438/2021 | EPI_ISL_3898153 | 2021-09-02      |
| hCoV-19/Japan/PG-86439/2021 | EPI_ISL_3898154 | 2021-09-02      |
| hCoV-19/Japan/PG-86440/2021 | EPI_ISL_3898155 | 2021-09-02      |
| hCoV-19/Japan/PG-86441/2021 | EPI_ISL_3898156 | 2021-09-02      |
| hCoV-19/Japan/PG-86442/2021 | EPI_ISL_3898157 | 2021-09-02      |
| hCoV-19/Japan/PG-86443/2021 | EPI_ISL_3898158 | 2021-09-02      |
| hCoV-19/Japan/PG-86444/2021 | EPI_ISL_3898159 | 2021-09-02      |
| hCoV-19/Japan/PG-86445/2021 | EPI_ISL_3898160 | 2021-09-02      |
| hCoV-19/Japan/PG-86446/2021 | EPI_ISL_3898161 | 2021-09-02      |
| hCoV-19/Japan/PG-86447/2021 | EPI_ISL_3898162 | 2021-09-02      |
| hCoV-19/Japan/PG-86448/2021 | EPI_ISL_3898163 | 2021-09-02      |
| hCoV-19/Japan/PG-86449/2021 | EPI_ISL_3898164 | 2021-09-02      |
| hCoV-19/Japan/PG-86450/2021 | EPI_ISL_3898165 | 2021-09-02      |
| hCoV-19/Japan/PG-86451/2021 | EPI_ISL_3898166 | 2021-09-02      |
| hCoV-19/Japan/PG-86452/2021 | EPI_ISL_3898167 | 2021-09-02      |
| hCoV-19/Japan/PG-86453/2021 | EPI_ISL_3898168 | 2021-09-02      |
| hCoV-19/Japan/PG-86454/2021 | EPI_ISL_3898169 | 2021-09-02      |
| hCoV-19/Japan/PG-86455/2021 | EPI_ISL_3898170 | 2021-09-02      |
| hCoV-19/Japan/PG-86456/2021 | EPI_ISL_3898171 | 2021-09-02      |
| hCoV-19/Japan/PG-86457/2021 | EPI_ISL_3898172 | 2021-09-02      |
| hCoV-19/Japan/PG-86458/2021 | EPI_ISL_3898173 | 2021-09-02      |
| hCoV-19/Japan/PG-86459/2021 | EPI_ISL_3898174 | 2021-09-02      |
| hCoV-19/Japan/PG-86460/2021 | EPI_ISL_3898175 | 2021-09-02      |
| hCoV-19/Japan/PG-86461/2021 | EPI_ISL_3898176 | 2021-09-02      |
| hCoV-19/Japan/PG-86462/2021 | EPI_ISL_3898177 | 2021-09-02      |
| hCoV-19/Japan/PG-86463/2021 | EPI_ISL_3898178 | 2021-09-02      |
| hCoV-19/Japan/PG-86464/2021 | EPI_ISL_3898179 | 2021-09-02      |
| hCoV-19/Japan/PG-86465/2021 | EPI_ISL_3898180 | 2021-09-02      |
| hCoV-19/Japan/PG-86466/2021 | EPI_ISL_3898181 | 2021-09-02      |



| virus_name                  | epiID           | submission_date |
|-----------------------------|-----------------|-----------------|
| hCoV-19/Japan/PG-86467/2021 | EPI_ISL_3898182 | 2021-09-02      |
| hCoV-19/Japan/PG-86468/2021 | EPI_ISL_3898183 | 2021-09-02      |
| hCoV-19/Japan/PG-86469/2021 | EPI_ISL_3898184 | 2021-09-02      |
| hCoV-19/Japan/PG-86470/2021 | EPI_ISL_3898185 | 2021-09-02      |
| hCoV-19/Japan/PG-86471/2021 | EPI_ISL_3898186 | 2021-09-02      |
| hCoV-19/Japan/PG-86472/2021 | EPI_ISL_3898187 | 2021-09-02      |
| hCoV-19/Japan/PG-86473/2021 | EPI_ISL_3898188 | 2021-09-02      |
| hCoV-19/Japan/PG-86474/2021 | EPI_ISL_3898189 | 2021-09-02      |
| hCoV-19/Japan/PG-86475/2021 | EPI_ISL_3898190 | 2021-09-02      |
| hCoV-19/Japan/PG-86476/2021 | EPI_ISL_3898191 | 2021-09-02      |
| hCoV-19/Japan/PG-86477/2021 | EPI_ISL_3898192 | 2021-09-02      |
| hCoV-19/Japan/PG-86478/2021 | EPI_ISL_3898193 | 2021-09-02      |
| hCoV-19/Japan/PG-86479/2021 | EPI_ISL_3898194 | 2021-09-02      |
| hCoV-19/Japan/PG-86480/2021 | EPI_ISL_3898195 | 2021-09-02      |
| hCoV-19/Japan/PG-86481/2021 | EPI_ISL_3898196 | 2021-09-02      |
| hCoV-19/Japan/PG-86482/2021 | EPI_ISL_3898197 | 2021-09-02      |
| hCoV-19/Japan/PG-86483/2021 | EPI_ISL_3898198 | 2021-09-02      |
| hCoV-19/Japan/PG-86484/2021 | EPI_ISL_3898199 | 2021-09-02      |
| hCoV-19/Japan/PG-86485/2021 | EPI_ISL_3898200 | 2021-09-02      |
| hCoV-19/Japan/PG-86486/2021 | EPI_ISL_3898201 | 2021-09-02      |
| hCoV-19/Japan/PG-86487/2021 | EPI_ISL_3898202 | 2021-09-02      |
| hCoV-19/Japan/PG-86488/2021 | EPI_ISL_3898203 | 2021-09-02      |
| hCoV-19/Japan/PG-86489/2021 | EPI_ISL_3898204 | 2021-09-02      |
| hCoV-19/Japan/PG-86490/2021 | EPI_ISL_3898205 | 2021-09-02      |
| hCoV-19/Japan/PG-86491/2021 | EPI_ISL_3898206 | 2021-09-02      |
| hCoV-19/Japan/PG-86492/2021 | EPI_ISL_3898207 | 2021-09-02      |
| hCoV-19/Japan/PG-86493/2021 | EPI_ISL_3898208 | 2021-09-02      |
| hCoV-19/Japan/PG-86494/2021 | EPI_ISL_3898209 | 2021-09-02      |
| hCoV-19/Japan/PG-86495/2021 | EPI_ISL_3898210 | 2021-09-02      |
| hCoV-19/Japan/PG-86496/2021 | EPI_ISL_3898211 | 2021-09-02      |
| hCoV-19/Japan/PG-86497/2021 | EPI_ISL_3898212 | 2021-09-02      |
| hCoV-19/Japan/PG-86498/2021 | EPI_ISL_3898213 | 2021-09-02      |
| hCoV-19/Japan/PG-86499/2021 | EPI_ISL_3898214 | 2021-09-02      |
| hCoV-19/Japan/PG-86500/2021 | EPI_ISL_3898215 | 2021-09-02      |
| hCoV-19/Japan/PG-86501/2021 | EPI_ISL_3898216 | 2021-09-02      |
| hCoV-19/Japan/PG-86502/2021 | EPI_ISL_3898217 | 2021-09-02      |
| hCoV-19/Japan/PG-86503/2021 | EPI_ISL_3898218 | 2021-09-02      |
| hCoV-19/Japan/PG-86504/2021 | EPI_ISL_3898219 | 2021-09-02      |
| hCoV-19/Japan/PG-86505/2021 | EPI_ISL_3898220 | 2021-09-02      |
| hCoV-19/Japan/PG-86506/2021 | EPI_ISL_3898221 | 2021-09-02      |
| hCoV-19/Japan/PG-86507/2021 | EPI_ISL_3898222 | 2021-09-02      |
| hCoV-19/Japan/PG-86508/2021 | EPI_ISL_3898223 | 2021-09-02      |
| hCoV-19/Japan/PG-86509/2021 | EPI_ISL_3898224 | 2021-09-02      |
| hCoV-19/Japan/PG-86510/2021 | EPI_ISL_3898225 | 2021-09-02      |
| hCoV-19/Japan/PG-86511/2021 | EPI_ISL_3898226 | 2021-09-02      |
| hCoV-19/Japan/PG-86512/2021 | EPI_ISL_3898227 | 2021-09-02      |
| hCoV-19/Japan/PG-86513/2021 | EPI_ISL_3898228 | 2021-09-02      |
| hCoV-19/Japan/PG-86514/2021 | EPI_ISL_3898229 | 2021-09-02      |
| hCoV-19/Japan/PG-86515/2021 | EPI_ISL_3898230 | 2021-09-02      |
| hCoV-19/Japan/PG-86516/2021 | EPI_ISL_3898231 | 2021-09-02      |
| hCoV-19/Japan/PG-86517/2021 | EPI_ISL_3898232 | 2021-09-02      |
| hCoV-19/Japan/PG-86518/2021 | EPI_ISL_3898233 | 2021-09-02      |
| hCoV-19/Japan/PG-86519/2021 | EPI_ISL_3898234 | 2021-09-02      |
| hCoV-19/Japan/PG-86520/2021 | EPI_ISL_3898235 | 2021-09-02      |

| virus_name                  | epiID           | submission_date |
|-----------------------------|-----------------|-----------------|
| hCoV-19/Japan/PG-86521/2021 | EPI_ISL_3898236 | 2021-09-02      |
| hCoV-19/Japan/PG-86522/2021 | EPI_ISL_3898237 | 2021-09-02      |
| hCoV-19/Japan/PG-86523/2021 | EPI_ISL_3898238 | 2021-09-02      |
| hCoV-19/Japan/PG-86524/2021 | EPI_ISL_3898239 | 2021-09-02      |
| hCoV-19/Japan/PG-86525/2021 | EPI_ISL_3898240 | 2021-09-02      |
| hCoV-19/Japan/PG-86526/2021 | EPI_ISL_3898241 | 2021-09-02      |
| hCoV-19/Japan/PG-86527/2021 | EPI_ISL_3898242 | 2021-09-02      |
| hCoV-19/Japan/PG-86528/2021 | EPI_ISL_3898243 | 2021-09-02      |
| hCoV-19/Japan/PG-86529/2021 | EPI_ISL_3898244 | 2021-09-02      |
| hCoV-19/Japan/PG-86530/2021 | EPI_ISL_3898245 | 2021-09-02      |
| hCoV-19/Japan/PG-86531/2021 | EPI_ISL_3898246 | 2021-09-02      |
| hCoV-19/Japan/PG-86532/2021 | EPI_ISL_3898247 | 2021-09-02      |
| hCoV-19/Japan/PG-86533/2021 | EPI_ISL_3898248 | 2021-09-02      |
| hCoV-19/Japan/PG-86534/2021 | EPI_ISL_3898249 | 2021-09-02      |
| hCoV-19/Japan/PG-86535/2021 | EPI_ISL_3898250 | 2021-09-02      |
| hCoV-19/Japan/PG-86536/2021 | EPI_ISL_3898251 | 2021-09-02      |
| hCoV-19/Japan/PG-86537/2021 | EPI_ISL_3898252 | 2021-09-02      |
| hCoV-19/Japan/PG-86538/2021 | EPI_ISL_3898253 | 2021-09-02      |
| hCoV-19/Japan/PG-86539/2021 | EPI_ISL_3898254 | 2021-09-02      |
| hCoV-19/Japan/PG-86540/2021 | EPI_ISL_3898255 | 2021-09-02      |
| hCoV-19/Japan/PG-86541/2021 | EPI_ISL_3898256 | 2021-09-02      |
| hCoV-19/Japan/PG-86542/2021 | EPI_ISL_3898257 | 2021-09-02      |
| hCoV-19/Japan/PG-86543/2021 | EPI_ISL_3898258 | 2021-09-02      |
| hCoV-19/Japan/PG-86544/2021 | EPI_ISL_3898259 | 2021-09-02      |
| hCoV-19/Japan/PG-86545/2021 | EPI_ISL_3898260 | 2021-09-02      |
| hCoV-19/Japan/PG-86546/2021 | EPI_ISL_3898261 | 2021-09-02      |
| hCoV-19/Japan/PG-86547/2021 | EPI_ISL_3898262 | 2021-09-02      |
| hCoV-19/Japan/PG-86548/2021 | EPI_ISL_3898263 | 2021-09-02      |
| hCoV-19/Japan/PG-86549/2021 | EPI_ISL_3898264 | 2021-09-02      |
| hCoV-19/Japan/PG-86550/2021 | EPI_ISL_3898265 | 2021-09-02      |
| hCoV-19/Japan/PG-86551/2021 | EPI_ISL_3898266 | 2021-09-02      |
| hCoV-19/Japan/PG-86552/2021 | EPI_ISL_3898267 | 2021-09-02      |
| hCoV-19/Japan/PG-86553/2021 | EPI_ISL_3898268 | 2021-09-02      |
| hCoV-19/Japan/PG-86554/2021 | EPI_ISL_3898269 | 2021-09-02      |
| hCoV-19/Japan/PG-86555/2021 | EPI_ISL_3898270 | 2021-09-02      |
| hCoV-19/Japan/PG-86556/2021 | EPI_ISL_3898271 | 2021-09-02      |
| hCoV-19/Japan/PG-86557/2021 | EPI_ISL_3898272 | 2021-09-02      |
| hCoV-19/Japan/PG-86558/2021 | EPI_ISL_3898273 | 2021-09-02      |
| hCoV-19/Japan/PG-86559/2021 | EPI_ISL_3898274 | 2021-09-02      |
| hCoV-19/Japan/PG-86560/2021 | EPI_ISL_3898275 | 2021-09-02      |
| hCoV-19/Japan/PG-86561/2021 | EPI_ISL_3898276 | 2021-09-02      |
| hCoV-19/Japan/PG-86562/2021 | EPI_ISL_3898277 | 2021-09-02      |
| hCoV-19/Japan/PG-86563/2021 | EPI_ISL_3898278 | 2021-09-02      |
| hCoV-19/Japan/PG-86564/2021 | EPI_ISL_3898279 | 2021-09-02      |
| hCoV-19/Japan/PG-86565/2021 | EPI_ISL_3898280 | 2021-09-02      |
| hCoV-19/Japan/PG-86566/2021 | EPI_ISL_3898281 | 2021-09-02      |
| hCoV-19/Japan/PG-86567/2021 | EPI_ISL_3898282 | 2021-09-02      |
| hCoV-19/Japan/PG-86568/2021 | EPI_ISL_3898283 | 2021-09-02      |
| hCoV-19/Japan/PG-86569/2021 | EPI_ISL_3898284 | 2021-09-02      |
| hCoV-19/Japan/PG-86570/2021 | EPI_ISL_3898285 | 2021-09-02      |
| hCoV-19/Japan/PG-86571/2021 | EPI_ISL_3898286 | 2021-09-02      |
| hCoV-19/Japan/PG-86572/2021 | EPI_ISL_3898287 | 2021-09-02      |
| hCoV-19/Japan/PG-86573/2021 | EPI_ISL_3898288 | 2021-09-02      |
| hCoV-19/Japan/PG-86574/2021 | EPI_ISL_3898289 | 2021-09-02      |

| virus_name                  | epiID           | submission_date |
|-----------------------------|-----------------|-----------------|
| hCoV-19/Japan/PG-86575/2021 | EPI_ISL_3898290 | 2021-09-02      |
| hCoV-19/Japan/PG-86576/2021 | EPI_ISL_3898291 | 2021-09-02      |
| hCoV-19/Japan/PG-86577/2021 | EPI_ISL_3898292 | 2021-09-02      |
| hCoV-19/Japan/PG-86578/2021 | EPI_ISL_3898293 | 2021-09-02      |
| hCoV-19/Japan/PG-86579/2021 | EPI_ISL_3898294 | 2021-09-02      |
| hCoV-19/Japan/PG-86580/2021 | EPI_ISL_3898295 | 2021-09-02      |
| hCoV-19/Japan/PG-86581/2021 | EPI_ISL_3898296 | 2021-09-02      |
| hCoV-19/Japan/PG-86582/2021 | EPI_ISL_3898297 | 2021-09-02      |
| hCoV-19/Japan/PG-86583/2021 | EPI_ISL_3898298 | 2021-09-02      |
| hCoV-19/Japan/PG-86584/2021 | EPI_ISL_3898299 | 2021-09-02      |
| hCoV-19/Japan/PG-86585/2021 | EPI_ISL_3898300 | 2021-09-02      |
| hCoV-19/Japan/PG-86586/2021 | EPI_ISL_3898301 | 2021-09-02      |
| hCoV-19/Japan/PG-86587/2021 | EPI_ISL_3898302 | 2021-09-02      |
| hCoV-19/Japan/PG-86588/2021 | EPI_ISL_3898303 | 2021-09-02      |
| hCoV-19/Japan/PG-86589/2021 | EPI_ISL_3898304 | 2021-09-02      |
| hCoV-19/Japan/PG-86590/2021 | EPI_ISL_3898305 | 2021-09-02      |
| hCoV-19/Japan/PG-86591/2021 | EPI_ISL_3898306 | 2021-09-02      |
| hCoV-19/Japan/PG-86592/2021 | EPI_ISL_3898307 | 2021-09-02      |
| hCoV-19/Japan/PG-86593/2021 | EPI_ISL_3898308 | 2021-09-02      |
| hCoV-19/Japan/PG-86594/2021 | EPI_ISL_3898309 | 2021-09-02      |
| hCoV-19/Japan/PG-86595/2021 | EPI_ISL_3898310 | 2021-09-02      |
| hCoV-19/Japan/PG-86596/2021 | EPI_ISL_3898311 | 2021-09-02      |
| hCoV-19/Japan/PG-86597/2021 | EPI_ISL_3898312 | 2021-09-02      |
| hCoV-19/Japan/PG-86598/2021 | EPI_ISL_3898313 | 2021-09-02      |
| hCoV-19/Japan/PG-86599/2021 | EPI_ISL_3898314 | 2021-09-02      |
| hCoV-19/Japan/PG-86600/2021 | EPI_ISL_3898315 | 2021-09-02      |
| hCoV-19/Japan/PG-86601/2021 | EPI_ISL_3898316 | 2021-09-02      |
| hCoV-19/Japan/PG-86602/2021 | EPI_ISL_3898317 | 2021-09-02      |
| hCoV-19/Japan/PG-86603/2021 | EPI_ISL_3898318 | 2021-09-02      |
| hCoV-19/Japan/PG-86604/2021 | EPI_ISL_3898319 | 2021-09-02      |
| hCoV-19/Japan/PG-86605/2021 | EPI_ISL_3898320 | 2021-09-02      |
| hCoV-19/Japan/PG-86606/2021 | EPI_ISL_3898321 | 2021-09-02      |
| hCoV-19/Japan/PG-86607/2021 | EPI_ISL_3898322 | 2021-09-02      |
| hCoV-19/Japan/PG-86608/2021 | EPI_ISL_3898323 | 2021-09-02      |
| hCoV-19/Japan/PG-86609/2021 | EPI_ISL_3898324 | 2021-09-02      |
| hCoV-19/Japan/PG-86610/2021 | EPI_ISL_3898325 | 2021-09-02      |
| hCoV-19/Japan/PG-86611/2021 | EPI_ISL_3898326 | 2021-09-02      |
| hCoV-19/Japan/PG-86612/2021 | EPI_ISL_3898327 | 2021-09-02      |
| hCoV-19/Japan/PG-86613/2021 | EPI_ISL_3898328 | 2021-09-02      |
| hCoV-19/Japan/PG-86614/2021 | EPI_ISL_3898329 | 2021-09-02      |
| hCoV-19/Japan/PG-86615/2021 | EPI_ISL_3898330 | 2021-09-02      |
| hCoV-19/Japan/PG-86616/2021 | EPI_ISL_3898331 | 2021-09-02      |
| hCoV-19/Japan/PG-86617/2021 | EPI_ISL_3898332 | 2021-09-02      |
| hCoV-19/Japan/PG-86618/2021 | EPI_ISL_3898333 | 2021-09-02      |
| hCoV-19/Japan/PG-86619/2021 | EPI_ISL_3898334 | 2021-09-02      |
| hCoV-19/Japan/PG-86620/2021 | EPI_ISL_3898335 | 2021-09-02      |
| hCoV-19/Japan/PG-86621/2021 | EPI_ISL_3898336 | 2021-09-02      |
| hCoV-19/Japan/PG-86622/2021 | EPI_ISL_3898337 | 2021-09-02      |
| hCoV-19/Japan/PG-86623/2021 | EPI_ISL_3898338 | 2021-09-02      |
| hCoV-19/Japan/PG-86624/2021 | EPI_ISL_3898339 | 2021-09-02      |
| hCoV-19/Japan/PG-86625/2021 | EPI_ISL_3898340 | 2021-09-02      |
| hCoV-19/Japan/PG-86626/2021 | EPI_ISL_3898341 | 2021-09-02      |
| hCoV-19/Japan/PG-86627/2021 | EPI_ISL_3898342 | 2021-09-02      |
| hCoV-19/Japan/PG-86628/2021 | EPI_ISL_3898343 | 2021-09-02      |

| virus_name                  | epiID           | submission_date |
|-----------------------------|-----------------|-----------------|
| hCoV-19/Japan/PG-86629/2021 | EPI_ISL_3898344 | 2021-09-02      |
| hCoV-19/Japan/PG-86630/2021 | EPI_ISL_3898345 | 2021-09-02      |
| hCoV-19/Japan/PG-86631/2021 | EPI_ISL_3898346 | 2021-09-02      |
| hCoV-19/Japan/PG-86632/2021 | EPI_ISL_3898347 | 2021-09-02      |
| hCoV-19/Japan/PG-86633/2021 | EPI_ISL_3898348 | 2021-09-02      |
| hCoV-19/Japan/PG-86634/2021 | EPI_ISL_3898349 | 2021-09-02      |
| hCoV-19/Japan/PG-86635/2021 | EPI_ISL_3898350 | 2021-09-02      |
| hCoV-19/Japan/PG-86636/2021 | EPI_ISL_3898351 | 2021-09-02      |
| hCoV-19/Japan/PG-86637/2021 | EPI_ISL_3898352 | 2021-09-02      |
| hCoV-19/Japan/PG-86638/2021 | EPI_ISL_3898353 | 2021-09-02      |
| hCoV-19/Japan/PG-86639/2021 | EPI_ISL_3898354 | 2021-09-02      |
| hCoV-19/Japan/PG-86640/2021 | EPI_ISL_3898355 | 2021-09-02      |
| hCoV-19/Japan/PG-86641/2021 | EPI_ISL_3898356 | 2021-09-02      |
| hCoV-19/Japan/PG-86642/2021 | EPI_ISL_3898357 | 2021-09-02      |
| hCoV-19/Japan/PG-86643/2021 | EPI_ISL_3898358 | 2021-09-02      |
| hCoV-19/Japan/PG-86644/2021 | EPI_ISL_3898359 | 2021-09-02      |
| hCoV-19/Japan/PG-86645/2021 | EPI_ISL_3898360 | 2021-09-02      |
| hCoV-19/Japan/PG-86646/2021 | EPI_ISL_3898361 | 2021-09-02      |
| hCoV-19/Japan/PG-86647/2021 | EPI_ISL_3898362 | 2021-09-02      |
| hCoV-19/Japan/PG-86648/2021 | EPI_ISL_3898363 | 2021-09-02      |
| hCoV-19/Japan/PG-86649/2021 | EPI_ISL_3898364 | 2021-09-02      |
| hCoV-19/Japan/PG-86650/2021 | EPI_ISL_3898365 | 2021-09-02      |
| hCoV-19/Japan/PG-86651/2021 | EPI_ISL_3898366 | 2021-09-02      |
| hCoV-19/Japan/PG-86652/2021 | EPI_ISL_3898367 | 2021-09-02      |
| hCoV-19/Japan/PG-86653/2021 | EPI_ISL_3898368 | 2021-09-02      |
| hCoV-19/Japan/PG-86654/2021 | EPI_ISL_3898369 | 2021-09-02      |
| hCoV-19/Japan/PG-86655/2021 | EPI_ISL_3898370 | 2021-09-02      |
| hCoV-19/Japan/PG-86656/2021 | EPI_ISL_3898371 | 2021-09-02      |
| hCoV-19/Japan/PG-86657/2021 | EPI_ISL_3898372 | 2021-09-02      |
| hCoV-19/Japan/PG-86658/2021 | EPI_ISL_3898373 | 2021-09-02      |
| hCoV-19/Japan/PG-86659/2021 | EPI_ISL_3898374 | 2021-09-02      |
| hCoV-19/Japan/PG-86660/2021 | EPI_ISL_3898375 | 2021-09-02      |
| hCoV-19/Japan/PG-86661/2021 | EPI_ISL_3898376 | 2021-09-02      |
| hCoV-19/Japan/PG-86662/2021 | EPI_ISL_3898377 | 2021-09-02      |
| hCoV-19/Japan/PG-86663/2021 | EPI_ISL_3898378 | 2021-09-02      |
| hCoV-19/Japan/PG-86664/2021 | EPI_ISL_3898379 | 2021-09-02      |
| hCoV-19/Japan/PG-86665/2021 | EPI_ISL_3898380 | 2021-09-02      |
| hCoV-19/Japan/PG-86666/2021 | EPI_ISL_3898381 | 2021-09-02      |
| hCoV-19/Japan/PG-86667/2021 | EPI_ISL_3898382 | 2021-09-02      |
| hCoV-19/Japan/PG-86668/2021 | EPI_ISL_3898383 | 2021-09-02      |
| hCoV-19/Japan/PG-86669/2021 | EPI_ISL_3898384 | 2021-09-02      |
| hCoV-19/Japan/PG-86670/2021 | EPI_ISL_3898385 | 2021-09-02      |
| hCoV-19/Japan/PG-86671/2021 | EPI_ISL_3898386 | 2021-09-02      |
| hCoV-19/Japan/PG-86672/2021 | EPI_ISL_3898387 | 2021-09-02      |
| hCoV-19/Japan/PG-86673/2021 | EPI_ISL_3898388 | 2021-09-02      |
| hCoV-19/Japan/PG-86674/2021 | EPI_ISL_3898389 | 2021-09-02      |
| hCoV-19/Japan/PG-86675/2021 | EPI_ISL_3898390 | 2021-09-02      |
| hCoV-19/Japan/PG-86676/2021 | EPI_ISL_3898391 | 2021-09-02      |
| hCoV-19/Japan/PG-86677/2021 | EPI_ISL_3898392 | 2021-09-02      |
| hCoV-19/Japan/PG-86678/2021 | EPI_ISL_3898393 | 2021-09-02      |
| hCoV-19/Japan/PG-86679/2021 | EPI_ISL_3898394 | 2021-09-02      |
| hCoV-19/Japan/PG-86680/2021 | EPI_ISL_3898395 | 2021-09-02      |
| hCoV-19/Japan/PG-86681/2021 | EPI_ISL_3898396 | 2021-09-02      |
| hCoV-19/Japan/PG-86682/2021 | EPI_ISL_3898397 | 2021-09-02      |

| virus_name                  | epiID           | submission_date |
|-----------------------------|-----------------|-----------------|
| hCoV-19/Japan/PG-86683/2021 | EPI_ISL_3898398 | 2021-09-02      |
| hCoV-19/Japan/PG-86684/2021 | EPI_ISL_3898399 | 2021-09-02      |
| hCoV-19/Japan/PG-86685/2021 | EPI_ISL_3898400 | 2021-09-02      |
| hCoV-19/Japan/PG-86686/2021 | EPI_ISL_3898401 | 2021-09-02      |
| hCoV-19/Japan/PG-86687/2021 | EPI_ISL_3898402 | 2021-09-02      |
| hCoV-19/Japan/PG-86688/2021 | EPI_ISL_3898403 | 2021-09-02      |
| hCoV-19/Japan/PG-86689/2021 | EPI_ISL_3898404 | 2021-09-02      |
| hCoV-19/Japan/PG-86690/2021 | EPI_ISL_3898405 | 2021-09-02      |
| hCoV-19/Japan/PG-86691/2021 | EPI_ISL_3898406 | 2021-09-02      |
| hCoV-19/Japan/PG-86692/2021 | EPI_ISL_3898407 | 2021-09-02      |
| hCoV-19/Japan/PG-86693/2021 | EPI_ISL_3898408 | 2021-09-02      |
| hCoV-19/Japan/PG-86694/2021 | EPI_ISL_3898409 | 2021-09-02      |
| hCoV-19/Japan/PG-86695/2021 | EPI_ISL_3898410 | 2021-09-02      |
| hCoV-19/Japan/PG-86696/2021 | EPI_ISL_3898411 | 2021-09-02      |
| hCoV-19/Japan/PG-86697/2021 | EPI_ISL_3898412 | 2021-09-02      |
| hCoV-19/Japan/PG-86698/2021 | EPI_ISL_3898413 | 2021-09-02      |
| hCoV-19/Japan/PG-86699/2021 | EPI_ISL_3898414 | 2021-09-02      |
| hCoV-19/Japan/PG-86700/2021 | EPI_ISL_3898415 | 2021-09-02      |
| hCoV-19/Japan/PG-86701/2021 | EPI_ISL_3898416 | 2021-09-02      |
| hCoV-19/Japan/PG-86702/2021 | EPI_ISL_3898417 | 2021-09-02      |
| hCoV-19/Japan/PG-86703/2021 | EPI_ISL_3898418 | 2021-09-02      |
| hCoV-19/Japan/PG-86704/2021 | EPI_ISL_3898419 | 2021-09-02      |
| hCoV-19/Japan/PG-86705/2021 | EPI_ISL_3898420 | 2021-09-02      |
| hCoV-19/Japan/PG-86706/2021 | EPI_ISL_3898421 | 2021-09-02      |
| hCoV-19/Japan/PG-86707/2021 | EPI_ISL_3898422 | 2021-09-02      |
| hCoV-19/Japan/PG-86708/2021 | EPI_ISL_3898423 | 2021-09-02      |
| hCoV-19/Japan/PG-86709/2021 | EPI_ISL_3898424 | 2021-09-02      |
| hCoV-19/Japan/PG-86710/2021 | EPI_ISL_3898425 | 2021-09-02      |
| hCoV-19/Japan/PG-86711/2021 | EPI_ISL_3898426 | 2021-09-02      |
| hCoV-19/Japan/PG-86712/2021 | EPI_ISL_3898427 | 2021-09-02      |
| hCoV-19/Japan/PG-86713/2021 | EPI_ISL_3898428 | 2021-09-02      |
| hCoV-19/Japan/PG-86714/2021 | EPI_ISL_3898429 | 2021-09-02      |
| hCoV-19/Japan/PG-86715/2021 | EPI_ISL_3898430 | 2021-09-02      |
| hCoV-19/Japan/PG-86716/2021 | EPI_ISL_3898431 | 2021-09-02      |
| hCoV-19/Japan/PG-86717/2021 | EPI_ISL_3898432 | 2021-09-02      |
| hCoV-19/Japan/PG-86718/2021 | EPI_ISL_3898433 | 2021-09-02      |
| hCoV-19/Japan/PG-86719/2021 | EPI_ISL_3898434 | 2021-09-02      |
| hCoV-19/Japan/PG-86720/2021 | EPI_ISL_3898435 | 2021-09-02      |
| hCoV-19/Japan/PG-86721/2021 | EPI_ISL_3898436 | 2021-09-02      |
| hCoV-19/Japan/PG-86722/2021 | EPI_ISL_3898437 | 2021-09-02      |
| hCoV-19/Japan/PG-86723/2021 | EPI_ISL_3898438 | 2021-09-02      |
| hCoV-19/Japan/PG-86724/2021 | EPI_ISL_3898439 | 2021-09-02      |
| hCoV-19/Japan/PG-86725/2021 | EPI_ISL_3898440 | 2021-09-02      |
| hCoV-19/Japan/PG-86726/2021 | EPI_ISL_3898441 | 2021-09-02      |
| hCoV-19/Japan/PG-86727/2021 | EPI_ISL_3898442 | 2021-09-02      |
| hCoV-19/Japan/PG-86728/2021 | EPI_ISL_3898443 | 2021-09-02      |
| hCoV-19/Japan/PG-86729/2021 | EPI_ISL_3898444 | 2021-09-02      |
| hCoV-19/Japan/PG-86730/2021 | EPI_ISL_3898445 | 2021-09-02      |
| hCoV-19/Japan/PG-86731/2021 | EPI_ISL_3898446 | 2021-09-02      |
| hCoV-19/Japan/PG-86732/2021 | EPI_ISL_3898447 | 2021-09-02      |
| hCoV-19/Japan/PG-86733/2021 | EPI_ISL_3898448 | 2021-09-02      |
| hCoV-19/Japan/PG-86734/2021 | EPI_ISL_3898449 | 2021-09-02      |
| hCoV-19/Japan/PG-86735/2021 | EPI_ISL_3898450 | 2021-09-02      |
| hCoV-19/Japan/PG-86736/2021 | EPI_ISL_3898451 | 2021-09-02      |

| virus_name                  | epiID           | submission_date |
|-----------------------------|-----------------|-----------------|
| hCoV-19/Japan/PG-86737/2021 | EPI_ISL_3898452 | 2021-09-02      |
| hCoV-19/Japan/PG-86738/2021 | EPI_ISL_3898453 | 2021-09-02      |
| hCoV-19/Japan/PG-86739/2021 | EPI_ISL_3898454 | 2021-09-02      |
| hCoV-19/Japan/PG-86740/2021 | EPI_ISL_3898455 | 2021-09-02      |
| hCoV-19/Japan/PG-86741/2021 | EPI_ISL_3898456 | 2021-09-02      |
| hCoV-19/Japan/PG-86742/2021 | EPI_ISL_3898457 | 2021-09-02      |
| hCoV-19/Japan/PG-86743/2021 | EPI_ISL_3898458 | 2021-09-02      |
| hCoV-19/Japan/PG-86744/2021 | EPI_ISL_3898459 | 2021-09-02      |
| hCoV-19/Japan/PG-86745/2021 | EPI_ISL_3898460 | 2021-09-02      |
| hCoV-19/Japan/PG-86746/2021 | EPI_ISL_3898461 | 2021-09-02      |
| hCoV-19/Japan/PG-86747/2021 | EPI_ISL_3898462 | 2021-09-02      |
| hCoV-19/Japan/PG-86748/2021 | EPI_ISL_3898463 | 2021-09-02      |
| hCoV-19/Japan/PG-86749/2021 | EPI_ISL_3898464 | 2021-09-02      |
| hCoV-19/Japan/PG-86750/2021 | EPI_ISL_3898465 | 2021-09-02      |
| hCoV-19/Japan/PG-86751/2021 | EPI_ISL_3898466 | 2021-09-02      |
| hCoV-19/Japan/PG-86752/2021 | EPI_ISL_3898467 | 2021-09-02      |
| hCoV-19/Japan/PG-86753/2021 | EPI_ISL_3898468 | 2021-09-02      |
| hCoV-19/Japan/PG-86754/2021 | EPI_ISL_3898469 | 2021-09-02      |
| hCoV-19/Japan/PG-86755/2021 | EPI_ISL_3898470 | 2021-09-02      |
| hCoV-19/Japan/PG-86756/2021 | EPI_ISL_3898471 | 2021-09-02      |
| hCoV-19/Japan/PG-86757/2021 | EPI_ISL_3898472 | 2021-09-02      |
| hCoV-19/Japan/PG-86758/2021 | EPI_ISL_3898473 | 2021-09-02      |
| hCoV-19/Japan/PG-86759/2021 | EPI_ISL_3898474 | 2021-09-02      |
| hCoV-19/Japan/PG-86760/2021 | EPI_ISL_3898475 | 2021-09-02      |
| hCoV-19/Japan/PG-86761/2021 | EPI_ISL_3898476 | 2021-09-02      |
| hCoV-19/Japan/PG-86762/2021 | EPI_ISL_3898477 | 2021-09-02      |
| hCoV-19/Japan/PG-86763/2021 | EPI_ISL_3898478 | 2021-09-02      |
| hCoV-19/Japan/PG-86764/2021 | EPI_ISL_3898479 | 2021-09-02      |
| hCoV-19/Japan/PG-86765/2021 | EPI_ISL_3898480 | 2021-09-02      |
| hCoV-19/Japan/PG-86766/2021 | EPI_ISL_3898481 | 2021-09-02      |
| hCoV-19/Japan/PG-86767/2021 | EPI_ISL_3898482 | 2021-09-02      |
| hCoV-19/Japan/PG-86768/2021 | EPI_ISL_3898483 | 2021-09-02      |
| hCoV-19/Japan/PG-86769/2021 | EPI_ISL_3898484 | 2021-09-02      |
| hCoV-19/Japan/PG-86770/2021 | EPI_ISL_3898485 | 2021-09-02      |
| hCoV-19/Japan/PG-86771/2021 | EPI_ISL_3898486 | 2021-09-02      |
| hCoV-19/Japan/PG-86772/2021 | EPI_ISL_3898487 | 2021-09-02      |
| hCoV-19/Japan/PG-86773/2021 | EPI_ISL_3898488 | 2021-09-02      |
| hCoV-19/Japan/PG-86774/2021 | EPI_ISL_3898489 | 2021-09-02      |
| hCoV-19/Japan/PG-86775/2021 | EPI_ISL_3898490 | 2021-09-02      |
| hCoV-19/Japan/PG-86776/2021 | EPI_ISL_3898491 | 2021-09-02      |
| hCoV-19/Japan/PG-86777/2021 | EPI_ISL_3898492 | 2021-09-02      |
| hCoV-19/Japan/PG-86778/2021 | EPI_ISL_3898493 | 2021-09-02      |
| hCoV-19/Japan/PG-86779/2021 | EPI_ISL_3898494 | 2021-09-02      |
| hCoV-19/Japan/PG-86780/2021 | EPI_ISL_3898495 | 2021-09-02      |
| hCoV-19/Japan/PG-86781/2021 | EPI_ISL_3898496 | 2021-09-02      |
| hCoV-19/Japan/PG-86782/2021 | EPI_ISL_3898497 | 2021-09-02      |
| hCoV-19/Japan/PG-86783/2021 | EPI_ISL_3898498 | 2021-09-02      |
| hCoV-19/Japan/PG-86784/2021 | EPI_ISL_3898499 | 2021-09-02      |
| hCoV-19/Japan/PG-86785/2021 | EPI_ISL_3898500 | 2021-09-02      |
| hCoV-19/Japan/PG-86786/2021 | EPI_ISL_3898501 | 2021-09-02      |
| hCoV-19/Japan/PG-86787/2021 | EPI_ISL_3898502 | 2021-09-02      |
| hCoV-19/Japan/PG-86788/2021 | EPI_ISL_3898503 | 2021-09-02      |
| hCoV-19/Japan/PG-86789/2021 | EPI_ISL_3898504 | 2021-09-02      |
| hCoV-19/Japan/PG-86790/2021 | EPI_ISL_3898505 | 2021-09-02      |

| virus_name                  | epiID           | submission_date |
|-----------------------------|-----------------|-----------------|
| hCoV-19/Japan/PG-86791/2021 | EPI_ISL_3898506 | 2021-09-02      |
| hCoV-19/Japan/PG-86792/2021 | EPI_ISL_3898507 | 2021-09-02      |
| hCoV-19/Japan/PG-86793/2021 | EPI_ISL_3898508 | 2021-09-02      |
| hCoV-19/Japan/PG-86794/2021 | EPI_ISL_3898509 | 2021-09-02      |
| hCoV-19/Japan/PG-86795/2021 | EPI_ISL_3898510 | 2021-09-02      |
| hCoV-19/Japan/PG-86796/2021 | EPI_ISL_3898511 | 2021-09-02      |
| hCoV-19/Japan/PG-86797/2021 | EPI_ISL_3898512 | 2021-09-02      |
| hCoV-19/Japan/PG-86798/2021 | EPI_ISL_3898513 | 2021-09-02      |
| hCoV-19/Japan/PG-86799/2021 | EPI_ISL_3898514 | 2021-09-02      |
| hCoV-19/Japan/PG-86800/2021 | EPI_ISL_3898515 | 2021-09-02      |
| hCoV-19/Japan/PG-86801/2021 | EPI_ISL_3898516 | 2021-09-02      |
| hCoV-19/Japan/PG-86802/2021 | EPI_ISL_3898517 | 2021-09-02      |
| hCoV-19/Japan/PG-86803/2021 | EPI_ISL_3898518 | 2021-09-02      |
| hCoV-19/Japan/PG-86804/2021 | EPI_ISL_3898519 | 2021-09-02      |
| hCoV-19/Japan/PG-86805/2021 | EPI_ISL_3898520 | 2021-09-02      |
| hCoV-19/Japan/PG-86806/2021 | EPI_ISL_3898521 | 2021-09-02      |
| hCoV-19/Japan/PG-86807/2021 | EPI_ISL_3898522 | 2021-09-02      |
| hCoV-19/Japan/PG-86808/2021 | EPI_ISL_3898523 | 2021-09-02      |
| hCoV-19/Japan/PG-86809/2021 | EPI_ISL_3898524 | 2021-09-02      |
| hCoV-19/Japan/PG-86810/2021 | EPI_ISL_3898525 | 2021-09-02      |
| hCoV-19/Japan/PG-86811/2021 | EPI_ISL_3898526 | 2021-09-02      |
| hCoV-19/Japan/PG-86812/2021 | EPI_ISL_3898527 | 2021-09-02      |
| hCoV-19/Japan/PG-86813/2021 | EPI_ISL_3898528 | 2021-09-02      |
| hCoV-19/Japan/PG-86814/2021 | EPI_ISL_3898529 | 2021-09-02      |
| hCoV-19/Japan/PG-86815/2021 | EPI_ISL_3898530 | 2021-09-02      |
| hCoV-19/Japan/PG-86816/2021 | EPI_ISL_3898531 | 2021-09-02      |
| hCoV-19/Japan/PG-86817/2021 | EPI_ISL_3898532 | 2021-09-02      |
| hCoV-19/Japan/PG-86818/2021 | EPI_ISL_3898533 | 2021-09-02      |
| hCoV-19/Japan/PG-86819/2021 | EPI_ISL_3898534 | 2021-09-02      |
| hCoV-19/Japan/PG-86820/2021 | EPI_ISL_3898535 | 2021-09-02      |
| hCoV-19/Japan/PG-86821/2021 | EPI_ISL_3898536 | 2021-09-02      |
| hCoV-19/Japan/PG-86822/2021 | EPI_ISL_3898537 | 2021-09-02      |
| hCoV-19/Japan/PG-86823/2021 | EPI_ISL_3898538 | 2021-09-02      |
| hCoV-19/Japan/PG-86824/2021 | EPI_ISL_3898539 | 2021-09-02      |
| hCoV-19/Japan/PG-86825/2021 | EPI_ISL_3898540 | 2021-09-02      |
| hCoV-19/Japan/PG-86826/2021 | EPI_ISL_3898541 | 2021-09-02      |
| hCoV-19/Japan/PG-86827/2021 | EPI_ISL_3898542 | 2021-09-02      |
| hCoV-19/Japan/PG-86828/2021 | EPI_ISL_3898543 | 2021-09-02      |
| hCoV-19/Japan/PG-86829/2021 | EPI_ISL_3898544 | 2021-09-02      |
| hCoV-19/Japan/PG-86830/2021 | EPI_ISL_3898545 | 2021-09-02      |
| hCoV-19/Japan/PG-86831/2021 | EPI_ISL_3898546 | 2021-09-02      |
| hCoV-19/Japan/PG-86832/2021 | EPI_ISL_3898547 | 2021-09-02      |
| hCoV-19/Japan/PG-86833/2021 | EPI_ISL_3898548 | 2021-09-02      |
| hCoV-19/Japan/PG-86834/2021 | EPI_ISL_3898549 | 2021-09-02      |
| hCoV-19/Japan/PG-86835/2021 | EPI_ISL_3898550 | 2021-09-02      |
| hCoV-19/Japan/PG-86836/2021 | EPI_ISL_3898551 | 2021-09-02      |
| hCoV-19/Japan/PG-86837/2021 | EPI_ISL_3898552 | 2021-09-02      |
| hCoV-19/Japan/PG-86838/2021 | EPI_ISL_3898553 | 2021-09-02      |
| hCoV-19/Japan/PG-86839/2021 | EPI_ISL_3898554 | 2021-09-02      |
| hCoV-19/Japan/PG-86840/2021 | EPI_ISL_3898555 | 2021-09-02      |
| hCoV-19/Japan/PG-86841/2021 | EPI_ISL_3898556 | 2021-09-02      |
| hCoV-19/Japan/PG-86842/2021 | EPI_ISL_3898557 | 2021-09-02      |
| hCoV-19/Japan/PG-86843/2021 | EPI_ISL_3898558 | 2021-09-02      |
| hCoV-19/Japan/PG-86844/2021 | EPI_ISL_3898559 | 2021-09-02      |

| virus_name                  | epiID           | submission_date |
|-----------------------------|-----------------|-----------------|
| hCoV-19/Japan/PG-86845/2021 | EPI_ISL_3898560 | 2021-09-02      |
| hCoV-19/Japan/PG-86846/2021 | EPI_ISL_3898561 | 2021-09-02      |
| hCoV-19/Japan/PG-86847/2021 | EPI_ISL_3898562 | 2021-09-02      |
| hCoV-19/Japan/PG-86848/2021 | EPI_ISL_3898563 | 2021-09-02      |
| hCoV-19/Japan/PG-86849/2021 | EPI_ISL_3898564 | 2021-09-02      |
| hCoV-19/Japan/PG-86850/2021 | EPI_ISL_3898565 | 2021-09-02      |
| hCoV-19/Japan/PG-86851/2021 | EPI_ISL_3898566 | 2021-09-02      |
| hCoV-19/Japan/PG-86852/2021 | EPI_ISL_3898567 | 2021-09-02      |
| hCoV-19/Japan/PG-86853/2021 | EPI_ISL_3898568 | 2021-09-02      |
| hCoV-19/Japan/PG-86854/2021 | EPI_ISL_3898569 | 2021-09-02      |
| hCoV-19/Japan/PG-86855/2021 | EPI_ISL_3898570 | 2021-09-02      |
| hCoV-19/Japan/PG-86856/2021 | EPI_ISL_3898571 | 2021-09-02      |
| hCoV-19/Japan/PG-86857/2021 | EPI_ISL_3898572 | 2021-09-02      |
| hCoV-19/Japan/PG-86858/2021 | EPI_ISL_3898573 | 2021-09-02      |
| hCoV-19/Japan/PG-86859/2021 | EPI_ISL_3898574 | 2021-09-02      |
| hCoV-19/Japan/PG-86860/2021 | EPI_ISL_3898575 | 2021-09-02      |
| hCoV-19/Japan/PG-86861/2021 | EPI_ISL_3898576 | 2021-09-02      |
| hCoV-19/Japan/PG-86862/2021 | EPI_ISL_3898577 | 2021-09-02      |
| hCoV-19/Japan/PG-86863/2021 | EPI_ISL_3898578 | 2021-09-02      |
| hCoV-19/Japan/PG-86864/2021 | EPI_ISL_3898579 | 2021-09-02      |
| hCoV-19/Japan/PG-86865/2021 | EPI_ISL_3898580 | 2021-09-02      |
| hCoV-19/Japan/PG-86866/2021 | EPI_ISL_3898581 | 2021-09-02      |
| hCoV-19/Japan/PG-86867/2021 | EPI_ISL_3898582 | 2021-09-02      |
| hCoV-19/Japan/PG-86868/2021 | EPI_ISL_3898583 | 2021-09-02      |
| hCoV-19/Japan/PG-86869/2021 | EPI_ISL_3898584 | 2021-09-02      |
| hCoV-19/Japan/PG-86870/2021 | EPI_ISL_3898585 | 2021-09-02      |
| hCoV-19/Japan/PG-86871/2021 | EPI_ISL_3898586 | 2021-09-02      |
| hCoV-19/Japan/PG-86872/2021 | EPI_ISL_3898587 | 2021-09-02      |
| hCoV-19/Japan/PG-86873/2021 | EPI_ISL_3898588 | 2021-09-02      |
| hCoV-19/Japan/PG-86874/2021 | EPI_ISL_3898589 | 2021-09-02      |
| hCoV-19/Japan/PG-86875/2021 | EPI_ISL_3898590 | 2021-09-02      |
| hCoV-19/Japan/PG-86876/2021 | EPI_ISL_3898591 | 2021-09-02      |
| hCoV-19/Japan/PG-86877/2021 | EPI_ISL_3898592 | 2021-09-02      |
| hCoV-19/Japan/PG-86878/2021 | EPI_ISL_3898593 | 2021-09-02      |
| hCoV-19/Japan/PG-86879/2021 | EPI_ISL_3898594 | 2021-09-02      |
| hCoV-19/Japan/PG-86880/2021 | EPI_ISL_3898595 | 2021-09-02      |
| hCoV-19/Japan/PG-86881/2021 | EPI_ISL_3898596 | 2021-09-02      |
| hCoV-19/Japan/PG-86882/2021 | EPI_ISL_3898597 | 2021-09-02      |
| hCoV-19/Japan/PG-86883/2021 | EPI_ISL_3898598 | 2021-09-02      |
| hCoV-19/Japan/PG-86884/2021 | EPI_ISL_3898599 | 2021-09-02      |
| hCoV-19/Japan/PG-86885/2021 | EPI_ISL_3898600 | 2021-09-02      |
| hCoV-19/Japan/PG-86886/2021 | EPI_ISL_3898601 | 2021-09-02      |
| hCoV-19/Japan/PG-86887/2021 | EPI_ISL_3898602 | 2021-09-02      |
| hCoV-19/Japan/PG-86888/2021 | EPI_ISL_3898603 | 2021-09-02      |
| hCoV-19/Japan/PG-86889/2021 | EPI_ISL_3898604 | 2021-09-02      |
| hCoV-19/Japan/PG-86890/2021 | EPI_ISL_3898605 | 2021-09-02      |
| hCoV-19/Japan/PG-86891/2021 | EPI_ISL_3898606 | 2021-09-02      |
| hCoV-19/Japan/PG-86892/2021 | EPI_ISL_3898607 | 2021-09-02      |
| hCoV-19/Japan/PG-86893/2021 | EPI_ISL_3898608 | 2021-09-02      |
| hCoV-19/Japan/PG-86894/2021 | EPI_ISL_3898609 | 2021-09-02      |
| hCoV-19/Japan/PG-86895/2021 | EPI_ISL_3898610 | 2021-09-02      |
| hCoV-19/Japan/PG-86896/2021 | EPI_ISL_3898611 | 2021-09-02      |
| hCoV-19/Japan/PG-86897/2021 | EPI_ISL_3898612 | 2021-09-02      |
| hCoV-19/Japan/PG-86898/2021 | EPI_ISL_3898613 | 2021-09-02      |



| virus_name                  | epiID           | submission_date |
|-----------------------------|-----------------|-----------------|
| hCoV-19/Japan/PG-86899/2021 | EPI_ISL_3898614 | 2021-09-02      |
| hCoV-19/Japan/PG-86900/2021 | EPI_ISL_3898615 | 2021-09-02      |
| hCoV-19/Japan/PG-86901/2021 | EPI_ISL_3898616 | 2021-09-02      |
| hCoV-19/Japan/PG-86902/2021 | EPI_ISL_3898617 | 2021-09-02      |
| hCoV-19/Japan/PG-86903/2021 | EPI_ISL_3898618 | 2021-09-02      |
| hCoV-19/Japan/PG-86904/2021 | EPI_ISL_3898619 | 2021-09-02      |
| hCoV-19/Japan/PG-86905/2021 | EPI_ISL_3898620 | 2021-09-02      |
| hCoV-19/Japan/PG-86906/2021 | EPI_ISL_3898621 | 2021-09-02      |
| hCoV-19/Japan/PG-86907/2021 | EPI_ISL_3898622 | 2021-09-02      |
| hCoV-19/Japan/PG-86908/2021 | EPI_ISL_3898623 | 2021-09-02      |
| hCoV-19/Japan/PG-86909/2021 | EPI_ISL_3898624 | 2021-09-02      |
| hCoV-19/Japan/PG-86910/2021 | EPI_ISL_3898625 | 2021-09-02      |
| hCoV-19/Japan/PG-86911/2021 | EPI_ISL_3898626 | 2021-09-02      |
| hCoV-19/Japan/PG-86912/2021 | EPI_ISL_3898627 | 2021-09-02      |
| hCoV-19/Japan/PG-86913/2021 | EPI_ISL_3898628 | 2021-09-02      |
| hCoV-19/Japan/PG-86914/2021 | EPI_ISL_3898629 | 2021-09-02      |
| hCoV-19/Japan/PG-86915/2021 | EPI_ISL_3898630 | 2021-09-02      |
| hCoV-19/Japan/PG-86916/2021 | EPI_ISL_3898631 | 2021-09-02      |
| hCoV-19/Japan/PG-86917/2021 | EPI_ISL_3898632 | 2021-09-02      |
| hCoV-19/Japan/PG-86918/2021 | EPI_ISL_3898633 | 2021-09-02      |
| hCoV-19/Japan/PG-86919/2021 | EPI_ISL_3898634 | 2021-09-02      |
| hCoV-19/Japan/PG-86920/2021 | EPI_ISL_3898635 | 2021-09-02      |
| hCoV-19/Japan/PG-86921/2021 | EPI_ISL_3898636 | 2021-09-02      |
| hCoV-19/Japan/PG-86922/2021 | EPI_ISL_3898637 | 2021-09-02      |
| hCoV-19/Japan/PG-86923/2021 | EPI_ISL_3898638 | 2021-09-02      |
| hCoV-19/Japan/PG-86924/2021 | EPI_ISL_3898639 | 2021-09-02      |
| hCoV-19/Japan/PG-86925/2021 | EPI_ISL_3898640 | 2021-09-02      |
| hCoV-19/Japan/PG-86926/2021 | EPI_ISL_3898641 | 2021-09-02      |
| hCoV-19/Japan/PG-86927/2021 | EPI_ISL_3898642 | 2021-09-02      |
| hCoV-19/Japan/PG-86928/2021 | EPI_ISL_3898643 | 2021-09-02      |
| hCoV-19/Japan/PG-86929/2021 | EPI_ISL_3898644 | 2021-09-02      |
| hCoV-19/Japan/PG-86930/2021 | EPI_ISL_3898645 | 2021-09-02      |
| hCoV-19/Japan/PG-86931/2021 | EPI_ISL_3898646 | 2021-09-02      |
| hCoV-19/Japan/PG-86932/2021 | EPI_ISL_3898647 | 2021-09-02      |
| hCoV-19/Japan/PG-86933/2021 | EPI_ISL_3898648 | 2021-09-02      |
| hCoV-19/Japan/PG-86934/2021 | EPI_ISL_3898649 | 2021-09-02      |
| hCoV-19/Japan/PG-86935/2021 | EPI_ISL_3898650 | 2021-09-02      |
| hCoV-19/Japan/PG-86936/2021 | EPI_ISL_3898651 | 2021-09-02      |
| hCoV-19/Japan/PG-86937/2021 | EPI_ISL_3898652 | 2021-09-02      |
| hCoV-19/Japan/PG-86938/2021 | EPI_ISL_3898653 | 2021-09-02      |
| hCoV-19/Japan/PG-86939/2021 | EPI_ISL_3898654 | 2021-09-02      |
| hCoV-19/Japan/PG-86940/2021 | EPI_ISL_3898655 | 2021-09-02      |
| hCoV-19/Japan/PG-86941/2021 | EPI_ISL_3898656 | 2021-09-02      |
| hCoV-19/Japan/PG-86942/2021 | EPI_ISL_3898657 | 2021-09-02      |
| hCoV-19/Japan/PG-86943/2021 | EPI_ISL_3898658 | 2021-09-02      |
| hCoV-19/Japan/PG-86944/2021 | EPI_ISL_3898659 | 2021-09-02      |
| hCoV-19/Japan/PG-86945/2021 | EPI_ISL_3898660 | 2021-09-02      |
| hCoV-19/Japan/PG-86946/2021 | EPI_ISL_3898661 | 2021-09-02      |
| hCoV-19/Japan/PG-86947/2021 | EPI_ISL_3898662 | 2021-09-02      |
| hCoV-19/Japan/PG-86948/2021 | EPI_ISL_3898663 | 2021-09-02      |
| hCoV-19/Japan/PG-86949/2021 | EPI_ISL_3898664 | 2021-09-02      |
| hCoV-19/Japan/PG-86950/2021 | EPI_ISL_3898665 | 2021-09-02      |
| hCoV-19/Japan/PG-86951/2021 | EPI_ISL_3898666 | 2021-09-02      |
| hCoV-19/Japan/PG-86952/2021 | EPI_ISL_3898667 | 2021-09-02      |

| virus_name                  | epiID           | submission_date |
|-----------------------------|-----------------|-----------------|
| hCoV-19/Japan/PG-86953/2021 | EPI_ISL_3898668 | 2021-09-02      |
| hCoV-19/Japan/PG-86954/2021 | EPI_ISL_3898669 | 2021-09-02      |
| hCoV-19/Japan/PG-86955/2021 | EPI_ISL_3898670 | 2021-09-02      |
| hCoV-19/Japan/PG-86956/2021 | EPI_ISL_3898671 | 2021-09-02      |
| hCoV-19/Japan/PG-86957/2021 | EPI_ISL_3898672 | 2021-09-02      |
| hCoV-19/Japan/PG-86958/2021 | EPI_ISL_3898673 | 2021-09-02      |
| hCoV-19/Japan/PG-86959/2021 | EPI_ISL_3898674 | 2021-09-02      |
| hCoV-19/Japan/PG-86960/2021 | EPI_ISL_3898675 | 2021-09-02      |
| hCoV-19/Japan/PG-86961/2021 | EPI_ISL_3898676 | 2021-09-02      |
| hCoV-19/Japan/PG-86962/2021 | EPI_ISL_3898677 | 2021-09-02      |
| hCoV-19/Japan/PG-86963/2021 | EPI_ISL_3898678 | 2021-09-02      |
| hCoV-19/Japan/PG-86964/2021 | EPI_ISL_3898679 | 2021-09-02      |
| hCoV-19/Japan/PG-86965/2021 | EPI_ISL_3898680 | 2021-09-02      |
| hCoV-19/Japan/PG-86966/2021 | EPI_ISL_3898681 | 2021-09-02      |
| hCoV-19/Japan/PG-86967/2021 | EPI_ISL_3898682 | 2021-09-02      |
| hCoV-19/Japan/PG-86968/2021 | EPI_ISL_3898683 | 2021-09-02      |
| hCoV-19/Japan/PG-86969/2021 | EPI_ISL_3898684 | 2021-09-02      |
| hCoV-19/Japan/PG-86970/2021 | EPI_ISL_3898685 | 2021-09-02      |
| hCoV-19/Japan/PG-86971/2021 | EPI_ISL_3898686 | 2021-09-02      |
| hCoV-19/Japan/PG-86972/2021 | EPI_ISL_3898687 | 2021-09-02      |
| hCoV-19/Japan/PG-86973/2021 | EPI_ISL_3898688 | 2021-09-02      |
| hCoV-19/Japan/PG-86974/2021 | EPI_ISL_3898689 | 2021-09-02      |
| hCoV-19/Japan/PG-86975/2021 | EPI_ISL_3898690 | 2021-09-02      |
| hCoV-19/Japan/PG-86976/2021 | EPI_ISL_3898691 | 2021-09-02      |
| hCoV-19/Japan/PG-86977/2021 | EPI_ISL_3898692 | 2021-09-02      |
| hCoV-19/Japan/PG-86978/2021 | EPI_ISL_3898693 | 2021-09-02      |
| hCoV-19/Japan/PG-86979/2021 | EPI_ISL_3898694 | 2021-09-02      |
| hCoV-19/Japan/PG-86980/2021 | EPI_ISL_3898695 | 2021-09-02      |
| hCoV-19/Japan/PG-86981/2021 | EPI_ISL_3898696 | 2021-09-02      |
| hCoV-19/Japan/PG-86982/2021 | EPI_ISL_3898697 | 2021-09-02      |
| hCoV-19/Japan/PG-86983/2021 | EPI_ISL_3898698 | 2021-09-02      |
| hCoV-19/Japan/PG-86984/2021 | EPI_ISL_3898699 | 2021-09-02      |
| hCoV-19/Japan/PG-86985/2021 | EPI_ISL_3898700 | 2021-09-02      |
| hCoV-19/Japan/PG-86986/2021 | EPI_ISL_3898701 | 2021-09-02      |
| hCoV-19/Japan/PG-86987/2021 | EPI_ISL_3898702 | 2021-09-02      |
| hCoV-19/Japan/PG-86988/2021 | EPI_ISL_3898703 | 2021-09-02      |
| hCoV-19/Japan/PG-86989/2021 | EPI_ISL_3898704 | 2021-09-02      |
| hCoV-19/Japan/PG-86990/2021 | EPI_ISL_3898705 | 2021-09-02      |
| hCoV-19/Japan/PG-86991/2021 | EPI_ISL_3898706 | 2021-09-02      |
| hCoV-19/Japan/PG-86992/2021 | EPI_ISL_3898707 | 2021-09-02      |
| hCoV-19/Japan/PG-86993/2021 | EPI_ISL_3898708 | 2021-09-02      |
| hCoV-19/Japan/PG-86994/2021 | EPI_ISL_3898709 | 2021-09-02      |
| hCoV-19/Japan/PG-86995/2021 | EPI_ISL_3898710 | 2021-09-02      |
| hCoV-19/Japan/PG-86996/2021 | EPI_ISL_3898711 | 2021-09-02      |
| hCoV-19/Japan/PG-86997/2021 | EPI_ISL_3898712 | 2021-09-02      |
| hCoV-19/Japan/PG-86998/2021 | EPI_ISL_3898713 | 2021-09-02      |
| hCoV-19/Japan/PG-86999/2021 | EPI_ISL_3898714 | 2021-09-02      |
| hCoV-19/Japan/PG-87000/2021 | EPI_ISL_3898715 | 2021-09-02      |
| hCoV-19/Japan/PG-87001/2021 | EPI_ISL_3898716 | 2021-09-02      |
| hCoV-19/Japan/PG-87002/2021 | EPI_ISL_3898717 | 2021-09-02      |
| hCoV-19/Japan/PG-87003/2021 | EPI_ISL_3898718 | 2021-09-02      |
| hCoV-19/Japan/PG-87004/2021 | EPI_ISL_3898719 | 2021-09-02      |
| hCoV-19/Japan/PG-87005/2021 | EPI_ISL_3898720 | 2021-09-02      |
| hCoV-19/Japan/PG-87006/2021 | EPI_ISL_3898721 | 2021-09-02      |

| virus_name                  | epiID           | submission_date |
|-----------------------------|-----------------|-----------------|
| hCoV-19/Japan/PG-87007/2021 | EPI_ISL_3898722 | 2021-09-02      |
| hCoV-19/Japan/PG-87008/2021 | EPI_ISL_3898723 | 2021-09-02      |
| hCoV-19/Japan/PG-87009/2021 | EPI_ISL_3898724 | 2021-09-02      |
| hCoV-19/Japan/PG-87010/2021 | EPI_ISL_3898725 | 2021-09-02      |
| hCoV-19/Japan/PG-87011/2021 | EPI_ISL_3898726 | 2021-09-02      |
| hCoV-19/Japan/PG-87012/2021 | EPI_ISL_3898727 | 2021-09-02      |
| hCoV-19/Japan/PG-87013/2021 | EPI_ISL_3898728 | 2021-09-02      |
| hCoV-19/Japan/PG-87014/2021 | EPI_ISL_3898729 | 2021-09-02      |
| hCoV-19/Japan/PG-87015/2021 | EPI_ISL_3898730 | 2021-09-02      |
| hCoV-19/Japan/PG-87016/2021 | EPI_ISL_3898731 | 2021-09-02      |
| hCoV-19/Japan/PG-87017/2021 | EPI_ISL_3898732 | 2021-09-02      |
| hCoV-19/Japan/PG-87018/2021 | EPI_ISL_3898733 | 2021-09-02      |
| hCoV-19/Japan/PG-87019/2021 | EPI_ISL_3898734 | 2021-09-02      |
| hCoV-19/Japan/PG-87020/2021 | EPI_ISL_3898735 | 2021-09-02      |
| hCoV-19/Japan/PG-87021/2021 | EPI_ISL_3898736 | 2021-09-02      |
| hCoV-19/Japan/PG-87022/2021 | EPI_ISL_3898737 | 2021-09-02      |
| hCoV-19/Japan/PG-87023/2021 | EPI_ISL_3898738 | 2021-09-02      |
| hCoV-19/Japan/PG-87024/2021 | EPI_ISL_3898739 | 2021-09-02      |
| hCoV-19/Japan/PG-87025/2021 | EPI_ISL_3898740 | 2021-09-02      |
| hCoV-19/Japan/PG-87026/2021 | EPI_ISL_3898741 | 2021-09-02      |
| hCoV-19/Japan/PG-87027/2021 | EPI_ISL_3898742 | 2021-09-02      |
| hCoV-19/Japan/PG-87028/2021 | EPI_ISL_3898743 | 2021-09-02      |
| hCoV-19/Japan/PG-87029/2021 | EPI_ISL_3898744 | 2021-09-02      |
| hCoV-19/Japan/PG-87030/2021 | EPI_ISL_3898745 | 2021-09-02      |
| hCoV-19/Japan/PG-87031/2021 | EPI_ISL_3898746 | 2021-09-02      |
| hCoV-19/Japan/PG-87032/2021 | EPI_ISL_3898747 | 2021-09-02      |
| hCoV-19/Japan/PG-87033/2021 | EPI_ISL_3898748 | 2021-09-02      |
| hCoV-19/Japan/PG-87034/2021 | EPI_ISL_3898749 | 2021-09-02      |
| hCoV-19/Japan/PG-87035/2021 | EPI_ISL_3898750 | 2021-09-02      |
| hCoV-19/Japan/PG-87036/2021 | EPI_ISL_3898751 | 2021-09-02      |
| hCoV-19/Japan/PG-87037/2021 | EPI_ISL_3898752 | 2021-09-02      |
| hCoV-19/Japan/PG-87038/2021 | EPI_ISL_3898753 | 2021-09-02      |
| hCoV-19/Japan/PG-87039/2021 | EPI_ISL_3898754 | 2021-09-02      |
| hCoV-19/Japan/PG-87040/2021 | EPI_ISL_3898755 | 2021-09-02      |
| hCoV-19/Japan/PG-87041/2021 | EPI_ISL_3898756 | 2021-09-02      |
| hCoV-19/Japan/PG-87042/2021 | EPI_ISL_3898757 | 2021-09-02      |
| hCoV-19/Japan/PG-87043/2021 | EPI_ISL_3898758 | 2021-09-02      |
| hCoV-19/Japan/PG-87044/2021 | EPI_ISL_3898759 | 2021-09-02      |
| hCoV-19/Japan/PG-87045/2021 | EPI_ISL_3898760 | 2021-09-02      |
| hCoV-19/Japan/PG-87046/2021 | EPI_ISL_3898761 | 2021-09-02      |
| hCoV-19/Japan/PG-87047/2021 | EPI_ISL_3898762 | 2021-09-02      |
| hCoV-19/Japan/PG-87048/2021 | EPI_ISL_3898763 | 2021-09-02      |
| hCoV-19/Japan/PG-87049/2021 | EPI_ISL_3898764 | 2021-09-02      |
| hCoV-19/Japan/PG-87050/2021 | EPI_ISL_3898765 | 2021-09-02      |
| hCoV-19/Japan/PG-87051/2021 | EPI_ISL_3898766 | 2021-09-02      |
| hCoV-19/Japan/PG-87052/2021 | EPI_ISL_3898767 | 2021-09-02      |
| hCoV-19/Japan/PG-87053/2021 | EPI_ISL_3898768 | 2021-09-02      |
| hCoV-19/Japan/PG-87054/2021 | EPI_ISL_3898769 | 2021-09-02      |
| hCoV-19/Japan/PG-87055/2021 | EPI_ISL_3898770 | 2021-09-02      |
| hCoV-19/Japan/PG-87056/2021 | EPI_ISL_3898771 | 2021-09-02      |
| hCoV-19/Japan/PG-87057/2021 | EPI_ISL_3898772 | 2021-09-02      |
| hCoV-19/Japan/PG-87058/2021 | EPI_ISL_3898773 | 2021-09-02      |
| hCoV-19/Japan/PG-87059/2021 | EPI_ISL_3898774 | 2021-09-02      |
| hCoV-19/Japan/PG-87060/2021 | EPI_ISL_3898775 | 2021-09-02      |

| virus_name                  | epiID           | submission_date |
|-----------------------------|-----------------|-----------------|
| hCoV-19/Japan/PG-87061/2021 | EPI_ISL_3898776 | 2021-09-02      |
| hCoV-19/Japan/PG-87062/2021 | EPI_ISL_3898777 | 2021-09-02      |
| hCoV-19/Japan/PG-87063/2021 | EPI_ISL_3898778 | 2021-09-02      |
| hCoV-19/Japan/PG-87064/2021 | EPI_ISL_3898779 | 2021-09-02      |
| hCoV-19/Japan/PG-87065/2021 | EPI_ISL_3898780 | 2021-09-02      |
| hCoV-19/Japan/PG-87066/2021 | EPI_ISL_3898781 | 2021-09-02      |
| hCoV-19/Japan/PG-87067/2021 | EPI_ISL_3898782 | 2021-09-02      |
| hCoV-19/Japan/PG-87068/2021 | EPI_ISL_3898783 | 2021-09-02      |
| hCoV-19/Japan/PG-87069/2021 | EPI_ISL_3898784 | 2021-09-02      |
| hCoV-19/Japan/PG-87070/2021 | EPI_ISL_3898785 | 2021-09-02      |
| hCoV-19/Japan/PG-87071/2021 | EPI_ISL_3898786 | 2021-09-02      |
| hCoV-19/Japan/PG-87072/2021 | EPI_ISL_3898787 | 2021-09-02      |
| hCoV-19/Japan/PG-87073/2021 | EPI_ISL_3898788 | 2021-09-02      |
| hCoV-19/Japan/PG-87074/2021 | EPI_ISL_3898789 | 2021-09-02      |
| hCoV-19/Japan/PG-87075/2021 | EPI_ISL_3898790 | 2021-09-02      |
| hCoV-19/Japan/PG-87076/2021 | EPI_ISL_3898791 | 2021-09-02      |
| hCoV-19/Japan/PG-87077/2021 | EPI_ISL_3898792 | 2021-09-02      |
| hCoV-19/Japan/PG-87078/2021 | EPI_ISL_3898793 | 2021-09-02      |
| hCoV-19/Japan/PG-87079/2021 | EPI_ISL_3898794 | 2021-09-02      |
| hCoV-19/Japan/PG-87080/2021 | EPI_ISL_3898795 | 2021-09-02      |
| hCoV-19/Japan/PG-87081/2021 | EPI_ISL_3898796 | 2021-09-02      |
| hCoV-19/Japan/PG-87082/2021 | EPI_ISL_3898797 | 2021-09-02      |
| hCoV-19/Japan/PG-87083/2021 | EPI_ISL_3898798 | 2021-09-02      |
| hCoV-19/Japan/PG-87084/2021 | EPI_ISL_3898799 | 2021-09-02      |
| hCoV-19/Japan/PG-87085/2021 | EPI_ISL_3898800 | 2021-09-02      |
| hCoV-19/Japan/PG-87086/2021 | EPI_ISL_3898801 | 2021-09-02      |
| hCoV-19/Japan/PG-87087/2021 | EPI_ISL_3898802 | 2021-09-02      |
| hCoV-19/Japan/PG-87088/2021 | EPI_ISL_3898803 | 2021-09-02      |
| hCoV-19/Japan/PG-87089/2021 | EPI_ISL_3898804 | 2021-09-02      |
| hCoV-19/Japan/PG-87090/2021 | EPI_ISL_3898805 | 2021-09-02      |
| hCoV-19/Japan/PG-87091/2021 | EPI_ISL_3898806 | 2021-09-02      |
| hCoV-19/Japan/PG-87092/2021 | EPI_ISL_3898807 | 2021-09-02      |
| hCoV-19/Japan/PG-87093/2021 | EPI_ISL_3898808 | 2021-09-02      |
| hCoV-19/Japan/PG-87094/2021 | EPI_ISL_3898809 | 2021-09-02      |
| hCoV-19/Japan/PG-87095/2021 | EPI_ISL_3898810 | 2021-09-02      |
| hCoV-19/Japan/PG-87096/2021 | EPI_ISL_3898811 | 2021-09-02      |
| hCoV-19/Japan/PG-87097/2021 | EPI_ISL_3898812 | 2021-09-02      |
| hCoV-19/Japan/PG-87098/2021 | EPI_ISL_3898813 | 2021-09-02      |
| hCoV-19/Japan/PG-87099/2021 | EPI_ISL_3898814 | 2021-09-02      |
| hCoV-19/Japan/PG-87100/2021 | EPI_ISL_3898815 | 2021-09-02      |
| hCoV-19/Japan/PG-87101/2021 | EPI_ISL_3898816 | 2021-09-02      |
| hCoV-19/Japan/PG-87102/2021 | EPI_ISL_3898817 | 2021-09-02      |
| hCoV-19/Japan/PG-87103/2021 | EPI_ISL_3898818 | 2021-09-02      |
| hCoV-19/Japan/PG-87104/2021 | EPI_ISL_3898819 | 2021-09-02      |
| hCoV-19/Japan/PG-87105/2021 | EPI_ISL_3898820 | 2021-09-02      |
| hCoV-19/Japan/PG-87106/2021 | EPI_ISL_3898821 | 2021-09-02      |
| hCoV-19/Japan/PG-87107/2021 | EPI_ISL_3898822 | 2021-09-02      |
| hCoV-19/Japan/PG-87108/2021 | EPI_ISL_3898823 | 2021-09-02      |
| hCoV-19/Japan/PG-87109/2021 | EPI_ISL_3898824 | 2021-09-02      |
| hCoV-19/Japan/PG-87110/2021 | EPI_ISL_3898825 | 2021-09-02      |
| hCoV-19/Japan/PG-87111/2021 | EPI_ISL_3898826 | 2021-09-02      |
| hCoV-19/Japan/PG-87112/2021 | EPI_ISL_3898827 | 2021-09-02      |
| hCoV-19/Japan/PG-87113/2021 | EPI_ISL_3898828 | 2021-09-02      |
| hCoV-19/Japan/PG-87114/2021 | EPI_ISL_3898829 | 2021-09-02      |

| virus_name                  | epiID           | submission_date |
|-----------------------------|-----------------|-----------------|
| hCoV-19/Japan/PG-87115/2021 | EPI_ISL_3898830 | 2021-09-02      |
| hCoV-19/Japan/PG-87116/2021 | EPI_ISL_3898831 | 2021-09-02      |
| hCoV-19/Japan/PG-87117/2021 | EPI_ISL_3898832 | 2021-09-02      |
| hCoV-19/Japan/PG-87118/2021 | EPI_ISL_3898833 | 2021-09-02      |
| hCoV-19/Japan/PG-87119/2021 | EPI_ISL_3898834 | 2021-09-02      |
| hCoV-19/Japan/PG-87120/2021 | EPI_ISL_3898835 | 2021-09-02      |
| hCoV-19/Japan/PG-87121/2021 | EPI_ISL_3898836 | 2021-09-02      |
| hCoV-19/Japan/PG-87122/2021 | EPI_ISL_3898837 | 2021-09-02      |
| hCoV-19/Japan/PG-87123/2021 | EPI_ISL_3898838 | 2021-09-02      |
| hCoV-19/Japan/PG-87124/2021 | EPI_ISL_3898839 | 2021-09-02      |
| hCoV-19/Japan/PG-87125/2021 | EPI_ISL_3898840 | 2021-09-02      |
| hCoV-19/Japan/PG-87126/2021 | EPI_ISL_3898841 | 2021-09-02      |
| hCoV-19/Japan/PG-87127/2021 | EPI_ISL_3898842 | 2021-09-02      |
| hCoV-19/Japan/PG-87128/2021 | EPI_ISL_3898843 | 2021-09-02      |
| hCoV-19/Japan/PG-87129/2021 | EPI_ISL_3898844 | 2021-09-02      |
| hCoV-19/Japan/PG-87130/2021 | EPI_ISL_3898845 | 2021-09-02      |
| hCoV-19/Japan/PG-87131/2021 | EPI_ISL_3898846 | 2021-09-02      |
| hCoV-19/Japan/PG-87132/2021 | EPI_ISL_3898847 | 2021-09-02      |
| hCoV-19/Japan/PG-87133/2021 | EPI_ISL_3898848 | 2021-09-02      |
| hCoV-19/Japan/PG-87134/2021 | EPI_ISL_3898849 | 2021-09-02      |
| hCoV-19/Japan/PG-87135/2021 | EPI_ISL_3898850 | 2021-09-02      |
| hCoV-19/Japan/PG-87136/2021 | EPI_ISL_3898851 | 2021-09-02      |
| hCoV-19/Japan/PG-87137/2021 | EPI_ISL_3898852 | 2021-09-02      |
| hCoV-19/Japan/PG-87138/2021 | EPI_ISL_3898853 | 2021-09-02      |
| hCoV-19/Japan/PG-87139/2021 | EPI_ISL_3898854 | 2021-09-02      |
| hCoV-19/Japan/PG-87140/2021 | EPI_ISL_3898855 | 2021-09-02      |
| hCoV-19/Japan/PG-87141/2021 | EPI_ISL_3898856 | 2021-09-02      |
| hCoV-19/Japan/PG-87142/2021 | EPI_ISL_3898857 | 2021-09-02      |
| hCoV-19/Japan/PG-87143/2021 | EPI_ISL_3898858 | 2021-09-02      |
| hCoV-19/Japan/PG-87144/2021 | EPI_ISL_3898859 | 2021-09-02      |
| hCoV-19/Japan/PG-87145/2021 | EPI_ISL_3898860 | 2021-09-02      |
| hCoV-19/Japan/PG-87146/2021 | EPI_ISL_3898861 | 2021-09-02      |
| hCoV-19/Japan/PG-87147/2021 | EPI_ISL_3898862 | 2021-09-02      |
| hCoV-19/Japan/PG-87148/2021 | EPI_ISL_3898863 | 2021-09-02      |
| hCoV-19/Japan/PG-87149/2021 | EPI_ISL_3898864 | 2021-09-02      |
| hCoV-19/Japan/PG-87150/2021 | EPI_ISL_3898865 | 2021-09-02      |
| hCoV-19/Japan/PG-87151/2021 | EPI_ISL_3898866 | 2021-09-02      |
| hCoV-19/Japan/PG-87152/2021 | EPI_ISL_3898867 | 2021-09-02      |
| hCoV-19/Japan/PG-87153/2021 | EPI_ISL_3898868 | 2021-09-02      |
| hCoV-19/Japan/PG-87154/2021 | EPI_ISL_3898869 | 2021-09-02      |
| hCoV-19/Japan/PG-87155/2021 | EPI_ISL_3898870 | 2021-09-02      |
| hCoV-19/Japan/PG-87156/2021 | EPI_ISL_3898871 | 2021-09-02      |
| hCoV-19/Japan/PG-87157/2021 | EPI_ISL_3898872 | 2021-09-02      |
| hCoV-19/Japan/PG-87158/2021 | EPI_ISL_3898873 | 2021-09-02      |
| hCoV-19/Japan/PG-87159/2021 | EPI_ISL_3898874 | 2021-09-02      |
| hCoV-19/Japan/PG-87160/2021 | EPI_ISL_3898875 | 2021-09-02      |
| hCoV-19/Japan/PG-87161/2021 | EPI_ISL_3898876 | 2021-09-02      |
| hCoV-19/Japan/PG-87162/2021 | EPI_ISL_3898877 | 2021-09-02      |
| hCoV-19/Japan/PG-87163/2021 | EPI_ISL_3898878 | 2021-09-02      |
| hCoV-19/Japan/PG-87164/2021 | EPI_ISL_3898879 | 2021-09-02      |
| hCoV-19/Japan/PG-87165/2021 | EPI_ISL_3898880 | 2021-09-02      |
| hCoV-19/Japan/PG-87166/2021 | EPI_ISL_3898881 | 2021-09-02      |
| hCoV-19/Japan/PG-87167/2021 | EPI_ISL_3898882 | 2021-09-02      |
| hCoV-19/Japan/PG-87168/2021 | EPI_ISL_3898883 | 2021-09-02      |

| virus_name                  | epiID           | submission_date |
|-----------------------------|-----------------|-----------------|
| hCoV-19/Japan/PG-87169/2021 | EPI_ISL_3898884 | 2021-09-02      |
| hCoV-19/Japan/PG-87170/2021 | EPI_ISL_3898885 | 2021-09-02      |
| hCoV-19/Japan/PG-87171/2021 | EPI_ISL_3898886 | 2021-09-02      |
| hCoV-19/Japan/PG-87172/2021 | EPI_ISL_3898887 | 2021-09-02      |
| hCoV-19/Japan/PG-87173/2021 | EPI_ISL_3898888 | 2021-09-02      |
| hCoV-19/Japan/PG-87174/2021 | EPI_ISL_3898889 | 2021-09-02      |
| hCoV-19/Japan/PG-87175/2021 | EPI_ISL_3898890 | 2021-09-02      |
| hCoV-19/Japan/PG-87176/2021 | EPI_ISL_3898891 | 2021-09-02      |
| hCoV-19/Japan/PG-87177/2021 | EPI_ISL_3898892 | 2021-09-02      |
| hCoV-19/Japan/PG-87178/2021 | EPI_ISL_3898893 | 2021-09-02      |
| hCoV-19/Japan/PG-87179/2021 | EPI_ISL_3898894 | 2021-09-02      |
| hCoV-19/Japan/PG-87180/2021 | EPI_ISL_3898895 | 2021-09-02      |
| hCoV-19/Japan/PG-87181/2021 | EPI_ISL_3898896 | 2021-09-02      |
| hCoV-19/Japan/PG-87182/2021 | EPI_ISL_3898897 | 2021-09-02      |
| hCoV-19/Japan/PG-87183/2021 | EPI_ISL_3898898 | 2021-09-02      |
| hCoV-19/Japan/PG-87184/2021 | EPI_ISL_3898899 | 2021-09-02      |
| hCoV-19/Japan/PG-87185/2021 | EPI_ISL_3898900 | 2021-09-02      |
| hCoV-19/Japan/PG-87186/2021 | EPI_ISL_3898901 | 2021-09-02      |
| hCoV-19/Japan/PG-87187/2021 | EPI_ISL_3898902 | 2021-09-02      |
| hCoV-19/Japan/PG-87188/2021 | EPI_ISL_3898903 | 2021-09-02      |
| hCoV-19/Japan/PG-87189/2021 | EPI_ISL_3898904 | 2021-09-02      |
| hCoV-19/Japan/PG-87190/2021 | EPI_ISL_3898905 | 2021-09-02      |
| hCoV-19/Japan/PG-87191/2021 | EPI_ISL_3898906 | 2021-09-02      |
| hCoV-19/Japan/PG-87192/2021 | EPI_ISL_3898907 | 2021-09-02      |
| hCoV-19/Japan/PG-87193/2021 | EPI_ISL_3898908 | 2021-09-02      |
| hCoV-19/Japan/PG-87194/2021 | EPI_ISL_3898909 | 2021-09-02      |
| hCoV-19/Japan/PG-87195/2021 | EPI_ISL_3898910 | 2021-09-02      |
| hCoV-19/Japan/PG-87196/2021 | EPI_ISL_3898911 | 2021-09-02      |
| hCoV-19/Japan/PG-87197/2021 | EPI_ISL_3898912 | 2021-09-02      |
| hCoV-19/Japan/PG-87198/2021 | EPI_ISL_3898913 | 2021-09-02      |
| hCoV-19/Japan/PG-87199/2021 | EPI_ISL_3898914 | 2021-09-02      |
| hCoV-19/Japan/PG-87200/2021 | EPI_ISL_3898915 | 2021-09-02      |
| hCoV-19/Japan/PG-87201/2021 | EPI_ISL_3898916 | 2021-09-02      |
| hCoV-19/Japan/PG-87202/2021 | EPI_ISL_3898917 | 2021-09-02      |
| hCoV-19/Japan/PG-87203/2021 | EPI_ISL_3898918 | 2021-09-02      |
| hCoV-19/Japan/PG-87204/2021 | EPI_ISL_3898919 | 2021-09-02      |
| hCoV-19/Japan/PG-87205/2021 | EPI_ISL_3898920 | 2021-09-02      |
| hCoV-19/Japan/PG-87206/2021 | EPI_ISL_3898921 | 2021-09-02      |
| hCoV-19/Japan/PG-87207/2021 | EPI_ISL_3898922 | 2021-09-02      |
| hCoV-19/Japan/PG-87208/2021 | EPI_ISL_3898923 | 2021-09-02      |
| hCoV-19/Japan/PG-87209/2021 | EPI_ISL_3898924 | 2021-09-02      |
| hCoV-19/Japan/PG-87210/2021 | EPI_ISL_3898925 | 2021-09-02      |
| hCoV-19/Japan/PG-87211/2021 | EPI_ISL_3898926 | 2021-09-02      |
| hCoV-19/Japan/PG-87212/2021 | EPI_ISL_3898927 | 2021-09-02      |
| hCoV-19/Japan/PG-87213/2021 | EPI_ISL_3898928 | 2021-09-02      |
| hCoV-19/Japan/PG-87214/2021 | EPI_ISL_3898929 | 2021-09-02      |
| hCoV-19/Japan/PG-87215/2021 | EPI_ISL_3898930 | 2021-09-02      |
| hCoV-19/Japan/PG-87216/2021 | EPI_ISL_3898931 | 2021-09-02      |
| hCoV-19/Japan/PG-87217/2021 | EPI_ISL_3898932 | 2021-09-02      |
| hCoV-19/Japan/PG-87218/2021 | EPI_ISL_3898933 | 2021-09-02      |
| hCoV-19/Japan/PG-87219/2021 | EPI_ISL_3898934 | 2021-09-02      |
| hCoV-19/Japan/PG-87220/2021 | EPI_ISL_3898935 | 2021-09-02      |
| hCoV-19/Japan/PG-87221/2021 | EPI_ISL_3898936 | 2021-09-02      |
| hCoV-19/Japan/PG-87222/2021 | EPI_ISL_3898937 | 2021-09-02      |

| virus_name                  | epiID           | submission_date |
|-----------------------------|-----------------|-----------------|
| hCoV-19/Japan/PG-87223/2021 | EPI_ISL_3898938 | 2021-09-02      |
| hCoV-19/Japan/PG-87224/2021 | EPI_ISL_3898939 | 2021-09-02      |
| hCoV-19/Japan/PG-87225/2021 | EPI_ISL_3898940 | 2021-09-02      |
| hCoV-19/Japan/PG-87226/2021 | EPI_ISL_3898941 | 2021-09-02      |
| hCoV-19/Japan/PG-87227/2021 | EPI_ISL_3898942 | 2021-09-02      |
| hCoV-19/Japan/PG-87228/2021 | EPI_ISL_3898943 | 2021-09-02      |
| hCoV-19/Japan/PG-87229/2021 | EPI_ISL_3898944 | 2021-09-02      |
| hCoV-19/Japan/PG-87230/2021 | EPI_ISL_3898945 | 2021-09-02      |
| hCoV-19/Japan/PG-87231/2021 | EPI_ISL_3898946 | 2021-09-02      |
| hCoV-19/Japan/PG-87232/2021 | EPI_ISL_3898947 | 2021-09-02      |
| hCoV-19/Japan/PG-87233/2021 | EPI_ISL_3898948 | 2021-09-02      |
| hCoV-19/Japan/PG-87234/2021 | EPI_ISL_3898949 | 2021-09-02      |
| hCoV-19/Japan/PG-87235/2021 | EPI_ISL_3898950 | 2021-09-02      |
| hCoV-19/Japan/PG-87236/2021 | EPI_ISL_3898952 | 2021-09-02      |
| hCoV-19/Japan/PG-87237/2021 | EPI_ISL_3898954 | 2021-09-02      |
| hCoV-19/Japan/PG-87238/2021 | EPI_ISL_3898956 | 2021-09-02      |
| hCoV-19/Japan/PG-87239/2021 | EPI_ISL_3898957 | 2021-09-02      |
| hCoV-19/Japan/PG-87240/2021 | EPI_ISL_3898958 | 2021-09-02      |
| hCoV-19/Japan/PG-87241/2021 | EPI_ISL_3898959 | 2021-09-02      |
| hCoV-19/Japan/PG-87242/2021 | EPI_ISL_3898960 | 2021-09-02      |
| hCoV-19/Japan/PG-87243/2021 | EPI_ISL_3898961 | 2021-09-02      |
| hCoV-19/Japan/PG-87244/2021 | EPI_ISL_3898962 | 2021-09-02      |
| hCoV-19/Japan/PG-87245/2021 | EPI_ISL_3898963 | 2021-09-02      |
| hCoV-19/Japan/PG-87246/2021 | EPI_ISL_3898964 | 2021-09-02      |
| hCoV-19/Japan/PG-87247/2021 | EPI_ISL_3898965 | 2021-09-02      |
| hCoV-19/Japan/PG-87248/2021 | EPI_ISL_3898966 | 2021-09-02      |
| hCoV-19/Japan/PG-87249/2021 | EPI_ISL_3898967 | 2021-09-02      |
| hCoV-19/Japan/PG-87250/2021 | EPI_ISL_3898968 | 2021-09-02      |
| hCoV-19/Japan/PG-87251/2021 | EPI_ISL_3898969 | 2021-09-02      |
| hCoV-19/Japan/PG-87252/2021 | EPI_ISL_3898970 | 2021-09-02      |
| hCoV-19/Japan/PG-87253/2021 | EPI_ISL_3898971 | 2021-09-02      |
| hCoV-19/Japan/PG-87254/2021 | EPI_ISL_3898972 | 2021-09-02      |
| hCoV-19/Japan/PG-87255/2021 | EPI_ISL_3898973 | 2021-09-02      |
| hCoV-19/Japan/PG-87256/2021 | EPI_ISL_3898974 | 2021-09-02      |
| hCoV-19/Japan/PG-87257/2021 | EPI_ISL_3898975 | 2021-09-02      |
| hCoV-19/Japan/PG-87258/2021 | EPI_ISL_3898976 | 2021-09-02      |
| hCoV-19/Japan/PG-87259/2021 | EPI_ISL_3898977 | 2021-09-02      |
| hCoV-19/Japan/PG-87260/2021 | EPI_ISL_3898978 | 2021-09-02      |
| hCoV-19/Japan/PG-87261/2021 | EPI_ISL_3898979 | 2021-09-02      |
| hCoV-19/Japan/PG-87262/2021 | EPI_ISL_3898980 | 2021-09-02      |
| hCoV-19/Japan/PG-87263/2021 | EPI_ISL_3898981 | 2021-09-02      |
| hCoV-19/Japan/PG-87264/2021 | EPI_ISL_3898982 | 2021-09-02      |
| hCoV-19/Japan/PG-87265/2021 | EPI_ISL_3898983 | 2021-09-02      |
| hCoV-19/Japan/PG-87266/2021 | EPI_ISL_3898984 | 2021-09-02      |
| hCoV-19/Japan/PG-87267/2021 | EPI_ISL_3898985 | 2021-09-02      |
| hCoV-19/Japan/PG-87268/2021 | EPI_ISL_3898986 | 2021-09-02      |
| hCoV-19/Japan/PG-87269/2021 | EPI_ISL_3898987 | 2021-09-02      |
| hCoV-19/Japan/PG-87270/2021 | EPI_ISL_3898988 | 2021-09-02      |
| hCoV-19/Japan/PG-87271/2021 | EPI_ISL_3898989 | 2021-09-02      |
| hCoV-19/Japan/PG-87272/2021 | EPI_ISL_3898990 | 2021-09-02      |
| hCoV-19/Japan/PG-87273/2021 | EPI_ISL_3898991 | 2021-09-02      |
| hCoV-19/Japan/PG-87274/2021 | EPI_ISL_3898992 | 2021-09-02      |
| hCoV-19/Japan/PG-87275/2021 | EPI_ISL_3898993 | 2021-09-02      |
| hCoV-19/Japan/PG-87276/2021 | EPI_ISL_3898994 | 2021-09-02      |

| virus_name                  | epiID           | submission_date |
|-----------------------------|-----------------|-----------------|
| hCoV-19/Japan/PG-87277/2021 | EPI_ISL_3898995 | 2021-09-02      |
| hCoV-19/Japan/PG-87278/2021 | EPI_ISL_3898996 | 2021-09-02      |
| hCoV-19/Japan/PG-87279/2021 | EPI_ISL_3898997 | 2021-09-02      |
| hCoV-19/Japan/PG-87280/2021 | EPI_ISL_3898998 | 2021-09-02      |
| hCoV-19/Japan/PG-87281/2021 | EPI_ISL_3898999 | 2021-09-02      |
| hCoV-19/Japan/PG-87282/2021 | EPI_ISL_3899000 | 2021-09-02      |
| hCoV-19/Japan/PG-87283/2021 | EPI_ISL_3899001 | 2021-09-02      |
| hCoV-19/Japan/PG-87284/2021 | EPI_ISL_3899002 | 2021-09-02      |
| hCoV-19/Japan/PG-87285/2021 | EPI_ISL_3899003 | 2021-09-02      |
| hCoV-19/Japan/PG-87286/2021 | EPI_ISL_3899004 | 2021-09-02      |
| hCoV-19/Japan/PG-87287/2021 | EPI_ISL_3899005 | 2021-09-02      |
| hCoV-19/Japan/PG-87288/2021 | EPI_ISL_3899006 | 2021-09-02      |
| hCoV-19/Japan/PG-87289/2021 | EPI_ISL_3899007 | 2021-09-02      |
| hCoV-19/Japan/PG-87290/2021 | EPI_ISL_3899008 | 2021-09-02      |
| hCoV-19/Japan/PG-87291/2021 | EPI_ISL_3899009 | 2021-09-02      |
| hCoV-19/Japan/PG-87292/2021 | EPI_ISL_3899010 | 2021-09-02      |
| hCoV-19/Japan/PG-87293/2021 | EPI_ISL_3899011 | 2021-09-02      |
| hCoV-19/Japan/PG-87294/2021 | EPI_ISL_3899012 | 2021-09-02      |
| hCoV-19/Japan/PG-87295/2021 | EPI_ISL_3899013 | 2021-09-02      |
| hCoV-19/Japan/PG-87296/2021 | EPI_ISL_3899014 | 2021-09-02      |
| hCoV-19/Japan/PG-87297/2021 | EPI_ISL_3899015 | 2021-09-02      |
| hCoV-19/Japan/PG-87298/2021 | EPI_ISL_3899016 | 2021-09-02      |
| hCoV-19/Japan/PG-87299/2021 | EPI_ISL_3899017 | 2021-09-02      |
| hCoV-19/Japan/PG-87300/2021 | EPI_ISL_3899018 | 2021-09-02      |
| hCoV-19/Japan/PG-87301/2021 | EPI_ISL_3899019 | 2021-09-02      |
| hCoV-19/Japan/PG-87302/2021 | EPI_ISL_3899020 | 2021-09-02      |
| hCoV-19/Japan/PG-87303/2021 | EPI_ISL_3899021 | 2021-09-02      |
| hCoV-19/Japan/PG-87304/2021 | EPI_ISL_3899022 | 2021-09-02      |
| hCoV-19/Japan/PG-87305/2021 | EPI_ISL_3899023 | 2021-09-02      |
| hCoV-19/Japan/PG-87306/2021 | EPI_ISL_3899024 | 2021-09-02      |
| hCoV-19/Japan/PG-87307/2021 | EPI_ISL_3899025 | 2021-09-02      |
| hCoV-19/Japan/PG-87308/2021 | EPI_ISL_3899026 | 2021-09-02      |
| hCoV-19/Japan/PG-87309/2021 | EPI_ISL_3899027 | 2021-09-02      |
| hCoV-19/Japan/PG-87310/2021 | EPI_ISL_3899028 | 2021-09-02      |
| hCoV-19/Japan/PG-87311/2021 | EPI_ISL_3899029 | 2021-09-02      |
| hCoV-19/Japan/PG-87312/2021 | EPI_ISL_3899030 | 2021-09-02      |
| hCoV-19/Japan/PG-87313/2021 | EPI_ISL_3899031 | 2021-09-02      |
| hCoV-19/Japan/PG-87314/2021 | EPI_ISL_3899032 | 2021-09-02      |
| hCoV-19/Japan/PG-87315/2021 | EPI_ISL_3899033 | 2021-09-02      |
| hCoV-19/Japan/PG-87316/2021 | EPI_ISL_3899034 | 2021-09-02      |
| hCoV-19/Japan/PG-87317/2021 | EPI_ISL_3899035 | 2021-09-02      |
| hCoV-19/Japan/PG-87318/2021 | EPI_ISL_3899036 | 2021-09-02      |
| hCoV-19/Japan/PG-87319/2021 | EPI_ISL_3899037 | 2021-09-02      |
| hCoV-19/Japan/PG-87320/2021 | EPI_ISL_3899038 | 2021-09-02      |
| hCoV-19/Japan/PG-87321/2021 | EPI_ISL_3899039 | 2021-09-02      |
| hCoV-19/Japan/PG-87322/2021 | EPI_ISL_3899040 | 2021-09-02      |
| hCoV-19/Japan/PG-87323/2021 | EPI_ISL_3899041 | 2021-09-02      |
| hCoV-19/Japan/PG-87324/2021 | EPI_ISL_3899042 | 2021-09-02      |
| hCoV-19/Japan/PG-87325/2021 | EPI_ISL_3899043 | 2021-09-02      |
| hCoV-19/Japan/PG-87326/2021 | EPI_ISL_3899044 | 2021-09-02      |
| hCoV-19/Japan/PG-87327/2021 | EPI_ISL_3899045 | 2021-09-02      |
| hCoV-19/Japan/PG-87328/2021 | EPI_ISL_3899046 | 2021-09-02      |
| hCoV-19/Japan/PG-87329/2021 | EPI_ISL_3899047 | 2021-09-02      |
| hCoV-19/Japan/PG-87330/2021 | EPI_ISL_3899048 | 2021-09-02      |



| virus_name                  | epiID           | submission_date |
|-----------------------------|-----------------|-----------------|
| hCoV-19/Japan/PG-87331/2021 | EPI_ISL_3899049 | 2021-09-02      |
| hCoV-19/Japan/PG-87332/2021 | EPI_ISL_3899050 | 2021-09-02      |
| hCoV-19/Japan/PG-87333/2021 | EPI_ISL_3899051 | 2021-09-02      |
| hCoV-19/Japan/PG-87334/2021 | EPI_ISL_3899052 | 2021-09-02      |
| hCoV-19/Japan/PG-87335/2021 | EPI_ISL_3899053 | 2021-09-02      |
| hCoV-19/Japan/PG-87336/2021 | EPI_ISL_3899054 | 2021-09-02      |
| hCoV-19/Japan/PG-87337/2021 | EPI_ISL_3899055 | 2021-09-02      |
| hCoV-19/Japan/PG-87338/2021 | EPI_ISL_3899056 | 2021-09-02      |
| hCoV-19/Japan/PG-87339/2021 | EPI_ISL_3899057 | 2021-09-02      |
| hCoV-19/Japan/PG-87340/2021 | EPI_ISL_3899058 | 2021-09-02      |
| hCoV-19/Japan/PG-87341/2021 | EPI_ISL_3899059 | 2021-09-02      |
| hCoV-19/Japan/PG-87342/2021 | EPI_ISL_3899060 | 2021-09-02      |
| hCoV-19/Japan/PG-87343/2021 | EPI_ISL_3899061 | 2021-09-02      |
| hCoV-19/Japan/PG-87344/2021 | EPI_ISL_3899062 | 2021-09-02      |
| hCoV-19/Japan/PG-87345/2021 | EPI_ISL_3899063 | 2021-09-02      |
| hCoV-19/Japan/PG-87346/2021 | EPI_ISL_3899064 | 2021-09-02      |
| hCoV-19/Japan/PG-87347/2021 | EPI_ISL_3899065 | 2021-09-02      |
| hCoV-19/Japan/PG-87348/2021 | EPI_ISL_3899066 | 2021-09-02      |
| hCoV-19/Japan/PG-87349/2021 | EPI_ISL_3899067 | 2021-09-02      |
| hCoV-19/Japan/PG-87350/2021 | EPI_ISL_3899068 | 2021-09-02      |
| hCoV-19/Japan/PG-87351/2021 | EPI_ISL_3899069 | 2021-09-02      |
| hCoV-19/Japan/PG-87352/2021 | EPI_ISL_3899070 | 2021-09-02      |
| hCoV-19/Japan/PG-87353/2021 | EPI_ISL_3899071 | 2021-09-02      |
| hCoV-19/Japan/PG-87354/2021 | EPI_ISL_3899072 | 2021-09-02      |
| hCoV-19/Japan/PG-87355/2021 | EPI_ISL_3899073 | 2021-09-02      |
| hCoV-19/Japan/PG-87356/2021 | EPI_ISL_3899074 | 2021-09-02      |
| hCoV-19/Japan/PG-87357/2021 | EPI_ISL_3899075 | 2021-09-02      |
| hCoV-19/Japan/PG-87358/2021 | EPI_ISL_3899076 | 2021-09-02      |
| hCoV-19/Japan/PG-87359/2021 | EPI_ISL_3899077 | 2021-09-02      |
| hCoV-19/Japan/PG-87360/2021 | EPI_ISL_3899078 | 2021-09-02      |
| hCoV-19/Japan/PG-87361/2021 | EPI_ISL_3899079 | 2021-09-02      |
| hCoV-19/Japan/PG-87362/2021 | EPI_ISL_3899080 | 2021-09-02      |
| hCoV-19/Japan/PG-87363/2021 | EPI_ISL_3899081 | 2021-09-02      |
| hCoV-19/Japan/PG-87364/2021 | EPI_ISL_3899082 | 2021-09-02      |
| hCoV-19/Japan/PG-87365/2021 | EPI_ISL_3899083 | 2021-09-02      |
| hCoV-19/Japan/PG-87366/2021 | EPI_ISL_3899084 | 2021-09-02      |
| hCoV-19/Japan/PG-87367/2021 | EPI_ISL_3899085 | 2021-09-02      |
| hCoV-19/Japan/PG-87368/2021 | EPI_ISL_3899086 | 2021-09-02      |
| hCoV-19/Japan/PG-87369/2021 | EPI_ISL_3899087 | 2021-09-02      |
| hCoV-19/Japan/PG-87370/2021 | EPI_ISL_3899088 | 2021-09-02      |
| hCoV-19/Japan/PG-87371/2021 | EPI_ISL_3899089 | 2021-09-02      |
| hCoV-19/Japan/PG-87372/2021 | EPI_ISL_3899090 | 2021-09-02      |
| hCoV-19/Japan/PG-87373/2021 | EPI_ISL_3899091 | 2021-09-02      |
| hCoV-19/Japan/PG-87374/2021 | EPI_ISL_3899092 | 2021-09-02      |
| hCoV-19/Japan/PG-87375/2021 | EPI_ISL_3899093 | 2021-09-02      |
| hCoV-19/Japan/PG-87376/2021 | EPI_ISL_3899094 | 2021-09-02      |
| hCoV-19/Japan/PG-87377/2021 | EPI_ISL_3899095 | 2021-09-02      |
| hCoV-19/Japan/PG-87378/2021 | EPI_ISL_3899096 | 2021-09-02      |
| hCoV-19/Japan/PG-87379/2021 | EPI_ISL_3899097 | 2021-09-02      |
| hCoV-19/Japan/PG-87380/2021 | EPI_ISL_3899098 | 2021-09-02      |
| hCoV-19/Japan/PG-87381/2021 | EPI_ISL_3899099 | 2021-09-02      |
| hCoV-19/Japan/PG-87382/2021 | EPI_ISL_3899100 | 2021-09-02      |
| hCoV-19/Japan/PG-87383/2021 | EPI_ISL_3899101 | 2021-09-02      |
| hCoV-19/Japan/PG-87384/2021 | EPI_ISL_3899102 | 2021-09-02      |

| virus_name                  | epiID           | submission_date |
|-----------------------------|-----------------|-----------------|
| hCoV-19/Japan/PG-87385/2021 | EPI_ISL_3899103 | 2021-09-02      |
| hCoV-19/Japan/PG-87386/2021 | EPI_ISL_3899104 | 2021-09-02      |
| hCoV-19/Japan/PG-87387/2021 | EPI_ISL_3899105 | 2021-09-02      |
| hCoV-19/Japan/PG-87388/2021 | EPI_ISL_3899106 | 2021-09-02      |
| hCoV-19/Japan/PG-87389/2021 | EPI_ISL_3899107 | 2021-09-02      |
| hCoV-19/Japan/PG-87390/2021 | EPI_ISL_3899108 | 2021-09-02      |
| hCoV-19/Japan/PG-87391/2021 | EPI_ISL_3899109 | 2021-09-02      |
| hCoV-19/Japan/PG-87392/2021 | EPI_ISL_3899110 | 2021-09-02      |
| hCoV-19/Japan/PG-87393/2021 | EPI_ISL_3899111 | 2021-09-02      |
| hCoV-19/Japan/PG-87394/2021 | EPI_ISL_3899112 | 2021-09-02      |
| hCoV-19/Japan/PG-87395/2021 | EPI_ISL_3899113 | 2021-09-02      |
| hCoV-19/Japan/PG-87396/2021 | EPI_ISL_3899114 | 2021-09-02      |
| hCoV-19/Japan/PG-87397/2021 | EPI_ISL_3899115 | 2021-09-02      |
| hCoV-19/Japan/PG-87398/2021 | EPI_ISL_3899116 | 2021-09-02      |
| hCoV-19/Japan/PG-87399/2021 | EPI_ISL_3899117 | 2021-09-02      |
| hCoV-19/Japan/PG-87400/2021 | EPI_ISL_3899118 | 2021-09-02      |
| hCoV-19/Japan/PG-87401/2021 | EPI_ISL_3899119 | 2021-09-02      |
| hCoV-19/Japan/PG-87402/2021 | EPI_ISL_3899120 | 2021-09-02      |
| hCoV-19/Japan/PG-87403/2021 | EPI_ISL_3899121 | 2021-09-02      |
| hCoV-19/Japan/PG-87404/2021 | EPI_ISL_3899122 | 2021-09-02      |
| hCoV-19/Japan/PG-87405/2021 | EPI_ISL_3899123 | 2021-09-02      |
| hCoV-19/Japan/PG-87406/2021 | EPI_ISL_3899124 | 2021-09-02      |
| hCoV-19/Japan/PG-87407/2021 | EPI_ISL_3899125 | 2021-09-02      |
| hCoV-19/Japan/PG-87408/2021 | EPI_ISL_3899126 | 2021-09-02      |
| hCoV-19/Japan/PG-87409/2021 | EPI_ISL_3899127 | 2021-09-02      |
| hCoV-19/Japan/PG-87410/2021 | EPI_ISL_3899128 | 2021-09-02      |
| hCoV-19/Japan/PG-87411/2021 | EPI_ISL_3899129 | 2021-09-02      |
| hCoV-19/Japan/PG-87412/2021 | EPI_ISL_3899130 | 2021-09-02      |
| hCoV-19/Japan/PG-87413/2021 | EPI_ISL_3899131 | 2021-09-02      |
| hCoV-19/Japan/PG-87414/2021 | EPI_ISL_3899132 | 2021-09-02      |
| hCoV-19/Japan/PG-87415/2021 | EPI_ISL_3899133 | 2021-09-02      |
| hCoV-19/Japan/PG-87416/2021 | EPI_ISL_3899134 | 2021-09-02      |
| hCoV-19/Japan/PG-87417/2021 | EPI_ISL_3899135 | 2021-09-02      |
| hCoV-19/Japan/PG-87418/2021 | EPI_ISL_3899136 | 2021-09-02      |
| hCoV-19/Japan/PG-87419/2021 | EPI_ISL_3899137 | 2021-09-02      |
| hCoV-19/Japan/PG-87420/2021 | EPI_ISL_3899138 | 2021-09-02      |
| hCoV-19/Japan/PG-87421/2021 | EPI_ISL_3899139 | 2021-09-02      |
| hCoV-19/Japan/PG-87422/2021 | EPI_ISL_3899140 | 2021-09-02      |
| hCoV-19/Japan/PG-87423/2021 | EPI_ISL_3899141 | 2021-09-02      |
| hCoV-19/Japan/PG-87424/2021 | EPI_ISL_3899142 | 2021-09-02      |
| hCoV-19/Japan/PG-87425/2021 | EPI_ISL_3899143 | 2021-09-02      |
| hCoV-19/Japan/PG-87426/2021 | EPI_ISL_3899144 | 2021-09-02      |
| hCoV-19/Japan/PG-87427/2021 | EPI_ISL_3899145 | 2021-09-02      |
| hCoV-19/Japan/PG-87428/2021 | EPI_ISL_3899146 | 2021-09-02      |
| hCoV-19/Japan/PG-87429/2021 | EPI_ISL_3899147 | 2021-09-02      |
| hCoV-19/Japan/PG-87430/2021 | EPI_ISL_3899148 | 2021-09-02      |
| hCoV-19/Japan/PG-87431/2021 | EPI_ISL_3899149 | 2021-09-02      |
| hCoV-19/Japan/PG-87432/2021 | EPI_ISL_3899150 | 2021-09-02      |
| hCoV-19/Japan/PG-87433/2021 | EPI_ISL_3899151 | 2021-09-02      |
| hCoV-19/Japan/PG-87434/2021 | EPI_ISL_3899152 | 2021-09-02      |
| hCoV-19/Japan/PG-87435/2021 | EPI_ISL_3899153 | 2021-09-02      |
| hCoV-19/Japan/PG-87436/2021 | EPI_ISL_3899154 | 2021-09-02      |
| hCoV-19/Japan/PG-87437/2021 | EPI_ISL_3899155 | 2021-09-02      |
| hCoV-19/Japan/PG-87438/2021 | EPI_ISL_3899156 | 2021-09-02      |

| virus_name                  | epiID           | submission_date |
|-----------------------------|-----------------|-----------------|
| hCoV-19/Japan/PG-87439/2021 | EPI_ISL_3899157 | 2021-09-02      |
| hCoV-19/Japan/PG-87440/2021 | EPI_ISL_3899158 | 2021-09-02      |
| hCoV-19/Japan/PG-87441/2021 | EPI_ISL_3899159 | 2021-09-02      |
| hCoV-19/Japan/PG-87442/2021 | EPI_ISL_3899160 | 2021-09-02      |
| hCoV-19/Japan/PG-87443/2021 | EPI_ISL_3899161 | 2021-09-02      |
| hCoV-19/Japan/PG-87444/2021 | EPI_ISL_3899162 | 2021-09-02      |
| hCoV-19/Japan/PG-87445/2021 | EPI_ISL_3899163 | 2021-09-02      |
| hCoV-19/Japan/PG-87446/2021 | EPI_ISL_3899164 | 2021-09-02      |
| hCoV-19/Japan/PG-87447/2021 | EPI_ISL_3899165 | 2021-09-02      |
| hCoV-19/Japan/PG-87448/2021 | EPI_ISL_3899166 | 2021-09-02      |
| hCoV-19/Japan/PG-87449/2021 | EPI_ISL_3899167 | 2021-09-02      |
| hCoV-19/Japan/PG-87450/2021 | EPI_ISL_3899169 | 2021-09-02      |
| hCoV-19/Japan/PG-87451/2021 | EPI_ISL_3899171 | 2021-09-02      |
| hCoV-19/Japan/PG-87452/2021 | EPI_ISL_3899174 | 2021-09-02      |
| hCoV-19/Japan/PG-87453/2021 | EPI_ISL_3899176 | 2021-09-02      |
| hCoV-19/Japan/PG-87454/2021 | EPI_ISL_3899179 | 2021-09-02      |
| hCoV-19/Japan/PG-87455/2021 | EPI_ISL_3899182 | 2021-09-02      |
| hCoV-19/Japan/PG-87456/2021 | EPI_ISL_3899185 | 2021-09-02      |
| hCoV-19/Japan/PG-87457/2021 | EPI_ISL_3899188 | 2021-09-02      |
| hCoV-19/Japan/PG-87458/2021 | EPI_ISL_3899191 | 2021-09-02      |
| hCoV-19/Japan/PG-87459/2021 | EPI_ISL_3899194 | 2021-09-02      |
| hCoV-19/Japan/PG-87460/2021 | EPI_ISL_3899197 | 2021-09-02      |
| hCoV-19/Japan/PG-87461/2021 | EPI_ISL_3899201 | 2021-09-02      |
| hCoV-19/Japan/PG-87462/2021 | EPI_ISL_3899204 | 2021-09-02      |
| hCoV-19/Japan/PG-87463/2021 | EPI_ISL_3899207 | 2021-09-02      |
| hCoV-19/Japan/PG-87464/2021 | EPI_ISL_3899210 | 2021-09-02      |
| hCoV-19/Japan/PG-87465/2021 | EPI_ISL_3899213 | 2021-09-02      |
| hCoV-19/Japan/PG-87466/2021 | EPI_ISL_3899214 | 2021-09-02      |
| hCoV-19/Japan/PG-87467/2021 | EPI_ISL_3899215 | 2021-09-02      |
| hCoV-19/Japan/PG-87468/2021 | EPI_ISL_3899216 | 2021-09-02      |
| hCoV-19/Japan/PG-87469/2021 | EPI_ISL_3899217 | 2021-09-02      |
| hCoV-19/Japan/PG-87470/2021 | EPI_ISL_3899218 | 2021-09-02      |
| hCoV-19/Japan/PG-87471/2021 | EPI_ISL_3899219 | 2021-09-02      |
| hCoV-19/Japan/PG-87472/2021 | EPI_ISL_3899220 | 2021-09-02      |
| hCoV-19/Japan/PG-87473/2021 | EPI_ISL_3899221 | 2021-09-02      |
| hCoV-19/Japan/PG-87474/2021 | EPI_ISL_3899222 | 2021-09-02      |
| hCoV-19/Japan/PG-87475/2021 | EPI_ISL_3899223 | 2021-09-02      |
| hCoV-19/Japan/PG-87476/2021 | EPI_ISL_3899224 | 2021-09-02      |
| hCoV-19/Japan/PG-87477/2021 | EPI_ISL_3899225 | 2021-09-02      |
| hCoV-19/Japan/PG-87478/2021 | EPI_ISL_3899226 | 2021-09-02      |
| hCoV-19/Japan/PG-87479/2021 | EPI_ISL_3899227 | 2021-09-02      |
| hCoV-19/Japan/PG-87480/2021 | EPI_ISL_3899228 | 2021-09-02      |
| hCoV-19/Japan/PG-87481/2021 | EPI_ISL_3899229 | 2021-09-02      |
| hCoV-19/Japan/PG-87482/2021 | EPI_ISL_3899230 | 2021-09-02      |
| hCoV-19/Japan/PG-87483/2021 | EPI_ISL_3899231 | 2021-09-02      |
| hCoV-19/Japan/PG-87484/2021 | EPI_ISL_3899232 | 2021-09-02      |
| hCoV-19/Japan/PG-87485/2021 | EPI_ISL_3899233 | 2021-09-02      |
| hCoV-19/Japan/PG-87486/2021 | EPI_ISL_3899234 | 2021-09-02      |
| hCoV-19/Japan/PG-87487/2021 | EPI_ISL_3899235 | 2021-09-02      |
| hCoV-19/Japan/PG-87488/2021 | EPI_ISL_3899236 | 2021-09-02      |
| hCoV-19/Japan/PG-87489/2021 | EPI_ISL_3899237 | 2021-09-02      |
| hCoV-19/Japan/PG-87490/2021 | EPI_ISL_3899238 | 2021-09-02      |
| hCoV-19/Japan/PG-87491/2021 | EPI_ISL_3899239 | 2021-09-02      |
| hCoV-19/Japan/PG-87492/2021 | EPI_ISL_3899240 | 2021-09-02      |

| virus_name                  | epiID           | submission_date |
|-----------------------------|-----------------|-----------------|
| hCoV-19/Japan/PG-87493/2021 | EPI_ISL_3899241 | 2021-09-02      |
| hCoV-19/Japan/PG-87494/2021 | EPI_ISL_3899244 | 2021-09-02      |
| hCoV-19/Japan/PG-87495/2021 | EPI_ISL_3899247 | 2021-09-02      |
| hCoV-19/Japan/PG-87496/2021 | EPI_ISL_3899249 | 2021-09-02      |
| hCoV-19/Japan/PG-87497/2021 | EPI_ISL_3899250 | 2021-09-02      |
| hCoV-19/Japan/PG-87498/2021 | EPI_ISL_3899252 | 2021-09-02      |
| hCoV-19/Japan/PG-87499/2021 | EPI_ISL_3899255 | 2021-09-02      |
| hCoV-19/Japan/PG-87500/2021 | EPI_ISL_3899257 | 2021-09-02      |
| hCoV-19/Japan/PG-87501/2021 | EPI_ISL_3899260 | 2021-09-02      |
| hCoV-19/Japan/PG-87502/2021 | EPI_ISL_3899261 | 2021-09-02      |
| hCoV-19/Japan/PG-87503/2021 | EPI_ISL_3899262 | 2021-09-02      |
| hCoV-19/Japan/PG-87504/2021 | EPI_ISL_3899264 | 2021-09-02      |
| hCoV-19/Japan/PG-87505/2021 | EPI_ISL_3899267 | 2021-09-02      |
| hCoV-19/Japan/PG-87506/2021 | EPI_ISL_3899270 | 2021-09-02      |
| hCoV-19/Japan/PG-87507/2021 | EPI_ISL_3899273 | 2021-09-02      |
| hCoV-19/Japan/PG-87508/2021 | EPI_ISL_3899276 | 2021-09-02      |
| hCoV-19/Japan/PG-87509/2021 | EPI_ISL_3899279 | 2021-09-02      |
| hCoV-19/Japan/PG-87510/2021 | EPI_ISL_3899283 | 2021-09-02      |
| hCoV-19/Japan/PG-87511/2021 | EPI_ISL_3899286 | 2021-09-02      |
| hCoV-19/Japan/PG-87512/2021 | EPI_ISL_3899288 | 2021-09-02      |
| hCoV-19/Japan/PG-87513/2021 | EPI_ISL_3899292 | 2021-09-02      |
| hCoV-19/Japan/PG-87514/2021 | EPI_ISL_3899295 | 2021-09-02      |
| hCoV-19/Japan/PG-87515/2021 | EPI_ISL_3899298 | 2021-09-02      |
| hCoV-19/Japan/PG-87516/2021 | EPI_ISL_3899302 | 2021-09-02      |
| hCoV-19/Japan/PG-87517/2021 | EPI_ISL_3899303 | 2021-09-02      |
| hCoV-19/Japan/PG-87518/2021 | EPI_ISL_3899304 | 2021-09-02      |
| hCoV-19/Japan/PG-87519/2021 | EPI_ISL_3899305 | 2021-09-02      |
| hCoV-19/Japan/PG-87520/2021 | EPI_ISL_3899306 | 2021-09-02      |
| hCoV-19/Japan/PG-87521/2021 | EPI_ISL_3899307 | 2021-09-02      |
| hCoV-19/Japan/PG-87522/2021 | EPI_ISL_3899308 | 2021-09-02      |
| hCoV-19/Japan/PG-87523/2021 | EPI_ISL_3899309 | 2021-09-02      |
| hCoV-19/Japan/PG-87524/2021 | EPI_ISL_3899310 | 2021-09-02      |
| hCoV-19/Japan/PG-87525/2021 | EPI_ISL_3899311 | 2021-09-02      |
| hCoV-19/Japan/PG-87526/2021 | EPI_ISL_3899312 | 2021-09-02      |
| hCoV-19/Japan/PG-87527/2021 | EPI_ISL_3899313 | 2021-09-02      |
| hCoV-19/Japan/PG-87528/2021 | EPI_ISL_3899314 | 2021-09-02      |
| hCoV-19/Japan/PG-87529/2021 | EPI_ISL_3899315 | 2021-09-02      |
| hCoV-19/Japan/PG-87530/2021 | EPI_ISL_3899316 | 2021-09-02      |
| hCoV-19/Japan/PG-87531/2021 | EPI_ISL_3899317 | 2021-09-02      |
| hCoV-19/Japan/PG-87532/2021 | EPI_ISL_3899318 | 2021-09-02      |
| hCoV-19/Japan/PG-87533/2021 | EPI_ISL_3899319 | 2021-09-02      |
| hCoV-19/Japan/PG-87534/2021 | EPI_ISL_3899320 | 2021-09-02      |
| hCoV-19/Japan/PG-87535/2021 | EPI_ISL_3899321 | 2021-09-02      |
| hCoV-19/Japan/PG-87536/2021 | EPI_ISL_3899322 | 2021-09-02      |
| hCoV-19/Japan/PG-87537/2021 | EPI_ISL_3899323 | 2021-09-02      |
| hCoV-19/Japan/PG-87538/2021 | EPI_ISL_3899324 | 2021-09-02      |
| hCoV-19/Japan/PG-87539/2021 | EPI_ISL_3899325 | 2021-09-02      |
| hCoV-19/Japan/PG-87540/2021 | EPI_ISL_3899326 | 2021-09-02      |
| hCoV-19/Japan/PG-87541/2021 | EPI_ISL_3899327 | 2021-09-02      |
| hCoV-19/Japan/PG-87542/2021 | EPI_ISL_3899328 | 2021-09-02      |
| hCoV-19/Japan/PG-87543/2021 | EPI_ISL_3899329 | 2021-09-02      |
| hCoV-19/Japan/PG-87544/2021 | EPI_ISL_3899330 | 2021-09-02      |
| hCoV-19/Japan/PG-87545/2021 | EPI_ISL_3899331 | 2021-09-02      |
| hCoV-19/Japan/PG-87546/2021 | EPI_ISL_3899332 | 2021-09-02      |

| virus_name                  | epiID           | submission_date |
|-----------------------------|-----------------|-----------------|
| hCoV-19/Japan/PG-87547/2021 | EPI_ISL_3899333 | 2021-09-02      |
| hCoV-19/Japan/PG-87548/2021 | EPI_ISL_3899334 | 2021-09-02      |
| hCoV-19/Japan/PG-87549/2021 | EPI_ISL_3899335 | 2021-09-02      |
| hCoV-19/Japan/PG-87550/2021 | EPI_ISL_3899336 | 2021-09-02      |
| hCoV-19/Japan/PG-87551/2021 | EPI_ISL_3899337 | 2021-09-02      |
| hCoV-19/Japan/PG-87552/2021 | EPI_ISL_3899338 | 2021-09-02      |
| hCoV-19/Japan/PG-87553/2021 | EPI_ISL_3899339 | 2021-09-02      |
| hCoV-19/Japan/PG-87554/2021 | EPI_ISL_3899340 | 2021-09-02      |
| hCoV-19/Japan/PG-87555/2021 | EPI_ISL_3899341 | 2021-09-02      |
| hCoV-19/Japan/PG-87556/2021 | EPI_ISL_3899342 | 2021-09-02      |
| hCoV-19/Japan/PG-87557/2021 | EPI_ISL_3899343 | 2021-09-02      |
| hCoV-19/Japan/PG-87558/2021 | EPI_ISL_3899344 | 2021-09-02      |
| hCoV-19/Japan/PG-87559/2021 | EPI_ISL_3899345 | 2021-09-02      |
| hCoV-19/Japan/PG-87560/2021 | EPI_ISL_3899346 | 2021-09-02      |
| hCoV-19/Japan/PG-87561/2021 | EPI_ISL_3899347 | 2021-09-02      |
| hCoV-19/Japan/PG-87562/2021 | EPI_ISL_3899348 | 2021-09-02      |
| hCoV-19/Japan/PG-87563/2021 | EPI_ISL_3899349 | 2021-09-02      |
| hCoV-19/Japan/PG-87564/2021 | EPI_ISL_3899350 | 2021-09-02      |
| hCoV-19/Japan/PG-87565/2021 | EPI_ISL_3899351 | 2021-09-02      |
| hCoV-19/Japan/PG-87566/2021 | EPI_ISL_3899352 | 2021-09-02      |
| hCoV-19/Japan/PG-87567/2021 | EPI_ISL_3899353 | 2021-09-02      |
| hCoV-19/Japan/PG-87568/2021 | EPI_ISL_3899354 | 2021-09-02      |
| hCoV-19/Japan/PG-87569/2021 | EPI_ISL_3899355 | 2021-09-02      |
| hCoV-19/Japan/PG-87570/2021 | EPI_ISL_3899356 | 2021-09-02      |
| hCoV-19/Japan/PG-87571/2021 | EPI_ISL_3899357 | 2021-09-02      |
| hCoV-19/Japan/PG-87572/2021 | EPI_ISL_3899358 | 2021-09-02      |
| hCoV-19/Japan/PG-87573/2021 | EPI_ISL_3899359 | 2021-09-02      |
| hCoV-19/Japan/PG-87574/2021 | EPI_ISL_3899360 | 2021-09-02      |
| hCoV-19/Japan/PG-87575/2021 | EPI_ISL_3899361 | 2021-09-02      |
| hCoV-19/Japan/PG-87576/2021 | EPI_ISL_3899362 | 2021-09-02      |
| hCoV-19/Japan/PG-87577/2021 | EPI_ISL_3899363 | 2021-09-02      |
| hCoV-19/Japan/PG-87578/2021 | EPI_ISL_3899364 | 2021-09-02      |
| hCoV-19/Japan/PG-87579/2021 | EPI_ISL_3899365 | 2021-09-02      |
| hCoV-19/Japan/PG-87580/2021 | EPI_ISL_3899366 | 2021-09-02      |
| hCoV-19/Japan/PG-87581/2021 | EPI_ISL_3899367 | 2021-09-02      |
| hCoV-19/Japan/PG-87582/2021 | EPI_ISL_3899368 | 2021-09-02      |
| hCoV-19/Japan/PG-87583/2021 | EPI_ISL_3899369 | 2021-09-02      |
| hCoV-19/Japan/PG-87584/2021 | EPI_ISL_3899370 | 2021-09-02      |
| hCoV-19/Japan/PG-87585/2021 | EPI_ISL_3899371 | 2021-09-02      |
| hCoV-19/Japan/PG-87586/2021 | EPI_ISL_3899372 | 2021-09-02      |
| hCoV-19/Japan/PG-87587/2021 | EPI_ISL_3899373 | 2021-09-02      |
| hCoV-19/Japan/PG-87588/2021 | EPI_ISL_3899374 | 2021-09-02      |
| hCoV-19/Japan/PG-87589/2021 | EPI_ISL_3899375 | 2021-09-02      |
| hCoV-19/Japan/PG-87590/2021 | EPI_ISL_3899376 | 2021-09-02      |
| hCoV-19/Japan/PG-87591/2021 | EPI_ISL_3899377 | 2021-09-02      |
| hCoV-19/Japan/PG-87592/2021 | EPI_ISL_3899378 | 2021-09-02      |
| hCoV-19/Japan/PG-87593/2021 | EPI_ISL_3899379 | 2021-09-02      |
| hCoV-19/Japan/PG-87594/2021 | EPI_ISL_3899380 | 2021-09-02      |
| hCoV-19/Japan/PG-87595/2021 | EPI_ISL_3899381 | 2021-09-02      |
| hCoV-19/Japan/PG-87596/2021 | EPI_ISL_3899382 | 2021-09-02      |
| hCoV-19/Japan/PG-87597/2021 | EPI_ISL_3899383 | 2021-09-02      |
| hCoV-19/Japan/PG-87766/2021 | EPI_ISL_3899384 | 2021-09-02      |
| hCoV-19/Japan/PG-87767/2021 | EPI_ISL_3899385 | 2021-09-02      |
| hCoV-19/Japan/PG-87768/2021 | EPI_ISL_3899386 | 2021-09-02      |

| virus_name                  | epiID           | submission_date |
|-----------------------------|-----------------|-----------------|
| hCoV-19/Japan/PG-87769/2021 | EPI_ISL_3899387 | 2021-09-02      |
| hCoV-19/Japan/PG-87770/2021 | EPI_ISL_3899388 | 2021-09-02      |
| hCoV-19/Japan/PG-87771/2021 | EPI_ISL_3899389 | 2021-09-02      |
| hCoV-19/Japan/PG-87772/2021 | EPI_ISL_3899390 | 2021-09-02      |
| hCoV-19/Japan/PG-87773/2021 | EPI_ISL_3899391 | 2021-09-02      |
| hCoV-19/Japan/PG-87774/2021 | EPI_ISL_3899392 | 2021-09-02      |
| hCoV-19/Japan/PG-87775/2021 | EPI_ISL_3899393 | 2021-09-02      |
| hCoV-19/Japan/PG-87776/2021 | EPI_ISL_3899394 | 2021-09-02      |
| hCoV-19/Japan/PG-87777/2021 | EPI_ISL_3899395 | 2021-09-02      |
| hCoV-19/Japan/PG-87778/2021 | EPI_ISL_3899396 | 2021-09-02      |
| hCoV-19/Japan/PG-87779/2021 | EPI_ISL_3899397 | 2021-09-02      |
| hCoV-19/Japan/PG-87780/2021 | EPI_ISL_3899398 | 2021-09-02      |
| hCoV-19/Japan/PG-87781/2021 | EPI_ISL_3899399 | 2021-09-02      |
| hCoV-19/Japan/PG-87782/2021 | EPI_ISL_3899400 | 2021-09-02      |
| hCoV-19/Japan/PG-87783/2021 | EPI_ISL_3899401 | 2021-09-02      |
| hCoV-19/Japan/PG-87784/2021 | EPI_ISL_3899402 | 2021-09-02      |
| hCoV-19/Japan/PG-87785/2021 | EPI_ISL_3899403 | 2021-09-02      |
| hCoV-19/Japan/PG-87786/2021 | EPI_ISL_3899404 | 2021-09-02      |
| hCoV-19/Japan/PG-87787/2021 | EPI_ISL_3899405 | 2021-09-02      |
| hCoV-19/Japan/PG-87788/2021 | EPI_ISL_3899406 | 2021-09-02      |
| hCoV-19/Japan/PG-87789/2021 | EPI_ISL_3899407 | 2021-09-02      |
| hCoV-19/Japan/PG-87790/2021 | EPI_ISL_3899408 | 2021-09-02      |
| hCoV-19/Japan/PG-87791/2021 | EPI_ISL_3899409 | 2021-09-02      |
| hCoV-19/Japan/PG-87792/2021 | EPI_ISL_3899410 | 2021-09-02      |
| hCoV-19/Japan/PG-87793/2021 | EPI_ISL_3899411 | 2021-09-02      |
| hCoV-19/Japan/PG-87794/2021 | EPI_ISL_3899412 | 2021-09-02      |
| hCoV-19/Japan/PG-87795/2021 | EPI_ISL_3899413 | 2021-09-02      |
| hCoV-19/Japan/PG-87796/2021 | EPI_ISL_3899414 | 2021-09-02      |
| hCoV-19/Japan/PG-87797/2021 | EPI_ISL_3899416 | 2021-09-02      |
| hCoV-19/Japan/PG-87798/2021 | EPI_ISL_3899417 | 2021-09-02      |
| hCoV-19/Japan/PG-87799/2021 | EPI_ISL_3899418 | 2021-09-02      |
| hCoV-19/Japan/PG-87800/2021 | EPI_ISL_3899419 | 2021-09-02      |
| hCoV-19/Japan/PG-87801/2021 | EPI_ISL_3899420 | 2021-09-02      |
| hCoV-19/Japan/PG-87802/2021 | EPI_ISL_3899421 | 2021-09-02      |
| hCoV-19/Japan/PG-87803/2021 | EPI_ISL_3899422 | 2021-09-02      |
| hCoV-19/Japan/PG-87804/2021 | EPI_ISL_3899423 | 2021-09-02      |
| hCoV-19/Japan/PG-87805/2021 | EPI_ISL_3899424 | 2021-09-02      |
| hCoV-19/Japan/PG-87806/2021 | EPI_ISL_3899425 | 2021-09-02      |
| hCoV-19/Japan/PG-87807/2021 | EPI_ISL_3899426 | 2021-09-02      |
| hCoV-19/Japan/PG-87808/2021 | EPI_ISL_3899427 | 2021-09-02      |
| hCoV-19/Japan/PG-87809/2021 | EPI_ISL_3899428 | 2021-09-02      |
| hCoV-19/Japan/PG-87810/2021 | EPI_ISL_3899429 | 2021-09-02      |
| hCoV-19/Japan/PG-87811/2021 | EPI_ISL_3899430 | 2021-09-02      |
| hCoV-19/Japan/PG-87812/2021 | EPI_ISL_3899431 | 2021-09-02      |
| hCoV-19/Japan/PG-87813/2021 | EPI_ISL_3899432 | 2021-09-02      |
| hCoV-19/Japan/PG-87814/2021 | EPI_ISL_3899433 | 2021-09-02      |
| hCoV-19/Japan/PG-87815/2021 | EPI_ISL_3899434 | 2021-09-02      |
| hCoV-19/Japan/PG-87816/2021 | EPI_ISL_3899435 | 2021-09-02      |
| hCoV-19/Japan/PG-87817/2021 | EPI_ISL_3899436 | 2021-09-02      |
| hCoV-19/Japan/PG-87818/2021 | EPI_ISL_3899437 | 2021-09-02      |
| hCoV-19/Japan/PG-87819/2021 | EPI_ISL_3899438 | 2021-09-02      |
| hCoV-19/Japan/PG-87820/2021 | EPI_ISL_3899440 | 2021-09-02      |
| hCoV-19/Japan/PG-87821/2021 | EPI_ISL_3899442 | 2021-09-02      |
| hCoV-19/Japan/PG-87822/2021 | EPI_ISL_3899444 | 2021-09-02      |

| virus_name                  | epiID           | submission_date |
|-----------------------------|-----------------|-----------------|
| hCoV-19/Japan/PG-87823/2021 | EPI_ISL_3899445 | 2021-09-02      |
| hCoV-19/Japan/PG-87824/2021 | EPI_ISL_3899447 | 2021-09-02      |
| hCoV-19/Japan/PG-87825/2021 | EPI_ISL_3899449 | 2021-09-02      |
| hCoV-19/Japan/PG-87826/2021 | EPI_ISL_3899452 | 2021-09-02      |
| hCoV-19/Japan/PG-87827/2021 | EPI_ISL_3899455 | 2021-09-02      |
| hCoV-19/Japan/PG-87828/2021 | EPI_ISL_3899458 | 2021-09-02      |
| hCoV-19/Japan/PG-87829/2021 | EPI_ISL_3899460 | 2021-09-02      |
| hCoV-19/Japan/PG-87830/2021 | EPI_ISL_3899461 | 2021-09-02      |
| hCoV-19/Japan/PG-87831/2021 | EPI_ISL_3899462 | 2021-09-02      |
| hCoV-19/Japan/PG-87832/2021 | EPI_ISL_3899463 | 2021-09-02      |
| hCoV-19/Japan/PG-87833/2021 | EPI_ISL_3899467 | 2021-09-02      |
| hCoV-19/Japan/PG-87834/2021 | EPI_ISL_3899470 | 2021-09-02      |
| hCoV-19/Japan/PG-87835/2021 | EPI_ISL_3899473 | 2021-09-02      |
| hCoV-19/Japan/PG-87836/2021 | EPI_ISL_3899474 | 2021-09-02      |
| hCoV-19/Japan/PG-87837/2021 | EPI_ISL_3899475 | 2021-09-02      |
| hCoV-19/Japan/PG-87838/2021 | EPI_ISL_3899477 | 2021-09-02      |
| hCoV-19/Japan/PG-87839/2021 | EPI_ISL_3899480 | 2021-09-02      |
| hCoV-19/Japan/PG-87840/2021 | EPI_ISL_3899483 | 2021-09-02      |
| hCoV-19/Japan/PG-87841/2021 | EPI_ISL_3899485 | 2021-09-02      |
| hCoV-19/Japan/PG-87842/2021 | EPI_ISL_3899486 | 2021-09-02      |
| hCoV-19/Japan/PG-87843/2021 | EPI_ISL_3899487 | 2021-09-02      |
| hCoV-19/Japan/PG-87844/2021 | EPI_ISL_3899490 | 2021-09-02      |
| hCoV-19/Japan/PG-87845/2021 | EPI_ISL_3899492 | 2021-09-02      |
| hCoV-19/Japan/PG-87846/2021 | EPI_ISL_3899494 | 2021-09-02      |
| hCoV-19/Japan/PG-87847/2021 | EPI_ISL_3899496 | 2021-09-02      |
| hCoV-19/Japan/PG-87848/2021 | EPI_ISL_3899499 | 2021-09-02      |
| hCoV-19/Japan/PG-87849/2021 | EPI_ISL_3899502 | 2021-09-02      |
| hCoV-19/Japan/PG-87850/2021 | EPI_ISL_3899505 | 2021-09-02      |
| hCoV-19/Japan/PG-87851/2021 | EPI_ISL_3899508 | 2021-09-02      |
| hCoV-19/Japan/PG-87852/2021 | EPI_ISL_3899511 | 2021-09-02      |
| hCoV-19/Japan/PG-87853/2021 | EPI_ISL_3899512 | 2021-09-02      |
| hCoV-19/Japan/PG-87854/2021 | EPI_ISL_3899513 | 2021-09-02      |
| hCoV-19/Japan/PG-87855/2021 | EPI_ISL_3899515 | 2021-09-02      |
| hCoV-19/Japan/PG-87856/2021 | EPI_ISL_3899516 | 2021-09-02      |
| hCoV-19/Japan/PG-87857/2021 | EPI_ISL_3899517 | 2021-09-02      |
| hCoV-19/Japan/PG-87858/2021 | EPI_ISL_3899520 | 2021-09-02      |
| hCoV-19/Japan/PG-87859/2021 | EPI_ISL_3899523 | 2021-09-02      |
| hCoV-19/Japan/PG-87860/2021 | EPI_ISL_3899527 | 2021-09-02      |
| hCoV-19/Japan/PG-87861/2021 | EPI_ISL_3899530 | 2021-09-02      |
| hCoV-19/Japan/PG-87862/2021 | EPI_ISL_3899533 | 2021-09-02      |
| hCoV-19/Japan/PG-87863/2021 | EPI_ISL_3899536 | 2021-09-02      |
| hCoV-19/Japan/PG-87864/2021 | EPI_ISL_3899539 | 2021-09-02      |
| hCoV-19/Japan/PG-87865/2021 | EPI_ISL_3899541 | 2021-09-02      |
| hCoV-19/Japan/PG-87866/2021 | EPI_ISL_3899543 | 2021-09-02      |
| hCoV-19/Japan/PG-87867/2021 | EPI_ISL_3899544 | 2021-09-02      |
| hCoV-19/Japan/PG-87868/2021 | EPI_ISL_3899546 | 2021-09-02      |
| hCoV-19/Japan/PG-87869/2021 | EPI_ISL_3899547 | 2021-09-02      |
| hCoV-19/Japan/PG-87870/2021 | EPI_ISL_3899548 | 2021-09-02      |
| hCoV-19/Japan/PG-87871/2021 | EPI_ISL_3899549 | 2021-09-02      |
| hCoV-19/Japan/PG-87872/2021 | EPI_ISL_3899551 | 2021-09-02      |
| hCoV-19/Japan/PG-87873/2021 | EPI_ISL_3899554 | 2021-09-02      |
| hCoV-19/Japan/PG-87874/2021 | EPI_ISL_3899556 | 2021-09-02      |
| hCoV-19/Japan/PG-87875/2021 | EPI_ISL_3899559 | 2021-09-02      |
| hCoV-19/Japan/PG-87876/2021 | EPI_ISL_3899560 | 2021-09-02      |

| virus_name                  | epiID           | submission_date |
|-----------------------------|-----------------|-----------------|
| hCoV-19/Japan/PG-87877/2021 | EPI_ISL_3899561 | 2021-09-02      |
| hCoV-19/Japan/PG-87878/2021 | EPI_ISL_3899563 | 2021-09-02      |
| hCoV-19/Japan/PG-87879/2021 | EPI_ISL_3899566 | 2021-09-02      |
| hCoV-19/Japan/PG-87880/2021 | EPI_ISL_3899569 | 2021-09-02      |
| hCoV-19/Japan/PG-87881/2021 | EPI_ISL_3899572 | 2021-09-02      |
| hCoV-19/Japan/PG-87882/2021 | EPI_ISL_3899573 | 2021-09-02      |
| hCoV-19/Japan/PG-87883/2021 | EPI_ISL_3899574 | 2021-09-02      |
| hCoV-19/Japan/PG-87884/2021 | EPI_ISL_3899575 | 2021-09-02      |
| hCoV-19/Japan/PG-87885/2021 | EPI_ISL_3899576 | 2021-09-02      |
| hCoV-19/Japan/PG-87886/2021 | EPI_ISL_3899577 | 2021-09-02      |
| hCoV-19/Japan/PG-87887/2021 | EPI_ISL_3899578 | 2021-09-02      |
| hCoV-19/Japan/PG-87888/2021 | EPI_ISL_3899579 | 2021-09-02      |
| hCoV-19/Japan/PG-87889/2021 | EPI_ISL_3899580 | 2021-09-02      |
| hCoV-19/Japan/PG-87890/2021 | EPI_ISL_3899581 | 2021-09-02      |
| hCoV-19/Japan/PG-87891/2021 | EPI_ISL_3899582 | 2021-09-02      |
| hCoV-19/Japan/PG-87892/2021 | EPI_ISL_3899583 | 2021-09-02      |
| hCoV-19/Japan/PG-87893/2021 | EPI_ISL_3899584 | 2021-09-02      |
| hCoV-19/Japan/PG-87894/2021 | EPI_ISL_3899585 | 2021-09-02      |
| hCoV-19/Japan/PG-87895/2021 | EPI_ISL_3899586 | 2021-09-02      |
| hCoV-19/Japan/PG-87896/2021 | EPI_ISL_3899587 | 2021-09-02      |
| hCoV-19/Japan/PG-87897/2021 | EPI_ISL_3899588 | 2021-09-02      |
| hCoV-19/Japan/PG-87898/2021 | EPI_ISL_3899589 | 2021-09-02      |
| hCoV-19/Japan/PG-87899/2021 | EPI_ISL_3899590 | 2021-09-02      |
| hCoV-19/Japan/PG-87900/2021 | EPI_ISL_3899591 | 2021-09-02      |
| hCoV-19/Japan/PG-87901/2021 | EPI_ISL_3899592 | 2021-09-02      |
| hCoV-19/Japan/PG-87902/2021 | EPI_ISL_3899593 | 2021-09-02      |
| hCoV-19/Japan/PG-87903/2021 | EPI_ISL_3899594 | 2021-09-02      |
| hCoV-19/Japan/PG-87904/2021 | EPI_ISL_3899595 | 2021-09-02      |
| hCoV-19/Japan/PG-87905/2021 | EPI_ISL_3899596 | 2021-09-02      |
| hCoV-19/Japan/PG-87906/2021 | EPI_ISL_3899597 | 2021-09-02      |
| hCoV-19/Japan/PG-87907/2021 | EPI_ISL_3899598 | 2021-09-02      |
| hCoV-19/Japan/PG-87908/2021 | EPI_ISL_3899599 | 2021-09-02      |
| hCoV-19/Japan/PG-87909/2021 | EPI_ISL_3899600 | 2021-09-02      |
| hCoV-19/Japan/PG-87910/2021 | EPI_ISL_3899601 | 2021-09-02      |
| hCoV-19/Japan/PG-87911/2021 | EPI_ISL_3899602 | 2021-09-02      |
| hCoV-19/Japan/PG-87912/2021 | EPI_ISL_3899603 | 2021-09-02      |
| hCoV-19/Japan/PG-87913/2021 | EPI_ISL_3899604 | 2021-09-02      |
| hCoV-19/Japan/PG-87914/2021 | EPI_ISL_3899605 | 2021-09-02      |
| hCoV-19/Japan/PG-87915/2021 | EPI_ISL_3899606 | 2021-09-02      |
| hCoV-19/Japan/PG-87916/2021 | EPI_ISL_3899607 | 2021-09-02      |
| hCoV-19/Japan/PG-87917/2021 | EPI_ISL_3899608 | 2021-09-02      |
| hCoV-19/Japan/PG-87918/2021 | EPI_ISL_3899609 | 2021-09-02      |
| hCoV-19/Japan/PG-87919/2021 | EPI_ISL_3899610 | 2021-09-02      |
| hCoV-19/Japan/PG-87920/2021 | EPI_ISL_3899611 | 2021-09-02      |
| hCoV-19/Japan/PG-87921/2021 | EPI_ISL_3899612 | 2021-09-02      |
| hCoV-19/Japan/PG-87922/2021 | EPI_ISL_3899613 | 2021-09-02      |
| hCoV-19/Japan/PG-87923/2021 | EPI_ISL_3899614 | 2021-09-02      |
| hCoV-19/Japan/PG-87924/2021 | EPI_ISL_3899615 | 2021-09-02      |
| hCoV-19/Japan/PG-87925/2021 | EPI_ISL_3899616 | 2021-09-02      |
| hCoV-19/Japan/PG-87926/2021 | EPI_ISL_3899617 | 2021-09-02      |
| hCoV-19/Japan/PG-87927/2021 | EPI_ISL_3899618 | 2021-09-02      |
| hCoV-19/Japan/PG-87928/2021 | EPI_ISL_3899619 | 2021-09-02      |
| hCoV-19/Japan/PG-87929/2021 | EPI_ISL_3899620 | 2021-09-02      |
| hCoV-19/Japan/PG-87930/2021 | EPI_ISL_3899621 | 2021-09-02      |



| virus_name                  | epiID           | submission_date |
|-----------------------------|-----------------|-----------------|
| hCoV-19/Japan/PG-87931/2021 | EPI_ISL_3899622 | 2021-09-02      |
| hCoV-19/Japan/PG-87932/2021 | EPI_ISL_3899623 | 2021-09-02      |
| hCoV-19/Japan/PG-87933/2021 | EPI_ISL_3899624 | 2021-09-02      |
| hCoV-19/Japan/PG-87934/2021 | EPI_ISL_3899625 | 2021-09-02      |
| hCoV-19/Japan/PG-87935/2021 | EPI_ISL_3899626 | 2021-09-02      |
| hCoV-19/Japan/PG-87936/2021 | EPI_ISL_3899627 | 2021-09-02      |
| hCoV-19/Japan/PG-87937/2021 | EPI_ISL_3899628 | 2021-09-02      |
| hCoV-19/Japan/PG-87938/2021 | EPI_ISL_3899629 | 2021-09-02      |
| hCoV-19/Japan/PG-87939/2021 | EPI_ISL_3899630 | 2021-09-02      |
| hCoV-19/Japan/PG-87940/2021 | EPI_ISL_3899631 | 2021-09-02      |
| hCoV-19/Japan/PG-87941/2021 | EPI_ISL_3899632 | 2021-09-02      |
| hCoV-19/Japan/PG-87942/2021 | EPI_ISL_3899633 | 2021-09-02      |
| hCoV-19/Japan/PG-87943/2021 | EPI_ISL_3899634 | 2021-09-02      |
| hCoV-19/Japan/PG-87944/2021 | EPI_ISL_3899635 | 2021-09-02      |
| hCoV-19/Japan/PG-87945/2021 | EPI_ISL_3899636 | 2021-09-02      |
| hCoV-19/Japan/PG-87946/2021 | EPI_ISL_3899637 | 2021-09-02      |
| hCoV-19/Japan/PG-87947/2021 | EPI_ISL_3899638 | 2021-09-02      |
| hCoV-19/Japan/PG-87948/2021 | EPI_ISL_3899639 | 2021-09-02      |
| hCoV-19/Japan/PG-87949/2021 | EPI_ISL_3899640 | 2021-09-02      |
| hCoV-19/Japan/PG-87950/2021 | EPI_ISL_3899641 | 2021-09-02      |
| hCoV-19/Japan/PG-87951/2021 | EPI_ISL_3899642 | 2021-09-02      |
| hCoV-19/Japan/PG-87952/2021 | EPI_ISL_3899643 | 2021-09-02      |
| hCoV-19/Japan/PG-87953/2021 | EPI_ISL_3899644 | 2021-09-02      |
| hCoV-19/Japan/PG-87954/2021 | EPI_ISL_3899645 | 2021-09-02      |
| hCoV-19/Japan/PG-87955/2021 | EPI_ISL_3899646 | 2021-09-02      |
| hCoV-19/Japan/PG-87956/2021 | EPI_ISL_3899647 | 2021-09-02      |
| hCoV-19/Japan/PG-87957/2021 | EPI_ISL_3899648 | 2021-09-02      |
| hCoV-19/Japan/PG-87958/2021 | EPI_ISL_3899649 | 2021-09-02      |
| hCoV-19/Japan/PG-87959/2021 | EPI_ISL_3899650 | 2021-09-02      |
| hCoV-19/Japan/PG-87960/2021 | EPI_ISL_3899651 | 2021-09-02      |
| hCoV-19/Japan/PG-87961/2021 | EPI_ISL_3899652 | 2021-09-02      |
| hCoV-19/Japan/PG-87962/2021 | EPI_ISL_3899653 | 2021-09-02      |
| hCoV-19/Japan/PG-87963/2021 | EPI_ISL_3899654 | 2021-09-02      |
| hCoV-19/Japan/PG-87964/2021 | EPI_ISL_3899655 | 2021-09-02      |
| hCoV-19/Japan/PG-87965/2021 | EPI_ISL_3899656 | 2021-09-02      |
| hCoV-19/Japan/PG-87966/2021 | EPI_ISL_3899657 | 2021-09-02      |
| hCoV-19/Japan/PG-87967/2021 | EPI_ISL_3899658 | 2021-09-02      |
| hCoV-19/Japan/PG-87968/2021 | EPI_ISL_3899659 | 2021-09-02      |
| hCoV-19/Japan/PG-87969/2021 | EPI_ISL_3899660 | 2021-09-02      |
| hCoV-19/Japan/PG-87970/2021 | EPI_ISL_3899661 | 2021-09-02      |
| hCoV-19/Japan/PG-87971/2021 | EPI_ISL_3899662 | 2021-09-02      |
| hCoV-19/Japan/PG-87972/2021 | EPI_ISL_3899663 | 2021-09-02      |
| hCoV-19/Japan/PG-87973/2021 | EPI_ISL_3899664 | 2021-09-02      |
| hCoV-19/Japan/PG-87974/2021 | EPI_ISL_3899665 | 2021-09-02      |
| hCoV-19/Japan/PG-87975/2021 | EPI_ISL_3899666 | 2021-09-02      |
| hCoV-19/Japan/PG-87976/2021 | EPI_ISL_3899667 | 2021-09-02      |
| hCoV-19/Japan/PG-87977/2021 | EPI_ISL_3899668 | 2021-09-02      |
| hCoV-19/Japan/PG-87978/2021 | EPI_ISL_3899669 | 2021-09-02      |
| hCoV-19/Japan/PG-87979/2021 | EPI_ISL_3899670 | 2021-09-02      |
| hCoV-19/Japan/PG-87980/2021 | EPI_ISL_3899671 | 2021-09-02      |
| hCoV-19/Japan/PG-87981/2021 | EPI_ISL_3899672 | 2021-09-02      |
| hCoV-19/Japan/PG-87982/2021 | EPI_ISL_3899673 | 2021-09-02      |
| hCoV-19/Japan/PG-87983/2021 | EPI_ISL_3899674 | 2021-09-02      |
| hCoV-19/Japan/PG-87984/2021 | EPI_ISL_3899675 | 2021-09-02      |

| virus_name                  | epiID           | submission_date |
|-----------------------------|-----------------|-----------------|
| hCoV-19/Japan/PG-87985/2021 | EPI_ISL_3899676 | 2021-09-02      |
| hCoV-19/Japan/PG-87986/2021 | EPI_ISL_3899677 | 2021-09-02      |
| hCoV-19/Japan/PG-87987/2021 | EPI_ISL_3899678 | 2021-09-02      |
| hCoV-19/Japan/PG-87988/2021 | EPI_ISL_3899679 | 2021-09-02      |
| hCoV-19/Japan/PG-87989/2021 | EPI_ISL_3899680 | 2021-09-02      |
| hCoV-19/Japan/PG-87990/2021 | EPI_ISL_3899681 | 2021-09-02      |
| hCoV-19/Japan/PG-87991/2021 | EPI_ISL_3899682 | 2021-09-02      |
| hCoV-19/Japan/PG-87992/2021 | EPI_ISL_3899683 | 2021-09-02      |
| hCoV-19/Japan/PG-87993/2021 | EPI_ISL_3899684 | 2021-09-02      |
| hCoV-19/Japan/PG-87994/2021 | EPI_ISL_3899685 | 2021-09-02      |
| hCoV-19/Japan/PG-87995/2021 | EPI_ISL_3899686 | 2021-09-02      |
| hCoV-19/Japan/PG-87996/2021 | EPI_ISL_3899687 | 2021-09-02      |
| hCoV-19/Japan/PG-87997/2021 | EPI_ISL_3899688 | 2021-09-02      |
| hCoV-19/Japan/PG-87998/2021 | EPI_ISL_3899689 | 2021-09-02      |
| hCoV-19/Japan/PG-87999/2021 | EPI_ISL_3899690 | 2021-09-02      |
| hCoV-19/Japan/PG-88000/2021 | EPI_ISL_3899691 | 2021-09-02      |
| hCoV-19/Japan/PG-88001/2021 | EPI_ISL_3899692 | 2021-09-02      |
| hCoV-19/Japan/PG-88002/2021 | EPI_ISL_3899693 | 2021-09-02      |
| hCoV-19/Japan/PG-88003/2021 | EPI_ISL_3899694 | 2021-09-02      |
| hCoV-19/Japan/PG-88004/2021 | EPI_ISL_3899695 | 2021-09-02      |
| hCoV-19/Japan/PG-88005/2021 | EPI_ISL_3899696 | 2021-09-02      |
| hCoV-19/Japan/PG-88006/2021 | EPI_ISL_3899698 | 2021-09-02      |
| hCoV-19/Japan/PG-88007/2021 | EPI_ISL_3899699 | 2021-09-02      |
| hCoV-19/Japan/PG-88008/2021 | EPI_ISL_3899702 | 2021-09-02      |
| hCoV-19/Japan/PG-88009/2021 | EPI_ISL_3899705 | 2021-09-02      |
| hCoV-19/Japan/PG-88010/2021 | EPI_ISL_3899708 | 2021-09-02      |
| hCoV-19/Japan/PG-88011/2021 | EPI_ISL_3899712 | 2021-09-02      |
| hCoV-19/Japan/PG-88012/2021 | EPI_ISL_3899714 | 2021-09-02      |
| hCoV-19/Japan/PG-88013/2021 | EPI_ISL_3899715 | 2021-09-02      |
| hCoV-19/Japan/PG-88014/2021 | EPI_ISL_3899716 | 2021-09-02      |
| hCoV-19/Japan/PG-88015/2021 | EPI_ISL_3899720 | 2021-09-02      |
| hCoV-19/Japan/PG-88016/2021 | EPI_ISL_3899723 | 2021-09-02      |
| hCoV-19/Japan/PG-88017/2021 | EPI_ISL_3899726 | 2021-09-02      |
| hCoV-19/Japan/PG-88018/2021 | EPI_ISL_3899727 | 2021-09-02      |
| hCoV-19/Japan/PG-88019/2021 | EPI_ISL_3899729 | 2021-09-02      |
| hCoV-19/Japan/PG-88020/2021 | EPI_ISL_3899732 | 2021-09-02      |
| hCoV-19/Japan/PG-88021/2021 | EPI_ISL_3899736 | 2021-09-02      |
| hCoV-19/Japan/PG-88022/2021 | EPI_ISL_3899738 | 2021-09-02      |
| hCoV-19/Japan/PG-88023/2021 | EPI_ISL_3899742 | 2021-09-02      |
| hCoV-19/Japan/PG-88024/2021 | EPI_ISL_3899745 | 2021-09-02      |
| hCoV-19/Japan/PG-88025/2021 | EPI_ISL_3899748 | 2021-09-02      |
| hCoV-19/Japan/PG-88026/2021 | EPI_ISL_3899751 | 2021-09-02      |
| hCoV-19/Japan/PG-88027/2021 | EPI_ISL_3899754 | 2021-09-02      |
| hCoV-19/Japan/PG-88028/2021 | EPI_ISL_3899758 | 2021-09-02      |
| hCoV-19/Japan/PG-88029/2021 | EPI_ISL_3899761 | 2021-09-02      |
| hCoV-19/Japan/PG-88030/2021 | EPI_ISL_3899763 | 2021-09-02      |
| hCoV-19/Japan/PG-88031/2021 | EPI_ISL_3899764 | 2021-09-02      |
| hCoV-19/Japan/PG-88032/2021 | EPI_ISL_3899765 | 2021-09-02      |
| hCoV-19/Japan/PG-88033/2021 | EPI_ISL_3899768 | 2021-09-02      |
| hCoV-19/Japan/PG-88034/2021 | EPI_ISL_3899772 | 2021-09-02      |
| hCoV-19/Japan/PG-88035/2021 | EPI_ISL_3899775 | 2021-09-02      |
| hCoV-19/Japan/PG-88036/2021 | EPI_ISL_3899778 | 2021-09-02      |
| hCoV-19/Japan/PG-88037/2021 | EPI_ISL_3899781 | 2021-09-02      |
| hCoV-19/Japan/PG-88038/2021 | EPI_ISL_3899784 | 2021-09-02      |

| virus_name                  | epiID           | submission_date |
|-----------------------------|-----------------|-----------------|
| hCoV-19/Japan/PG-88039/2021 | EPI_ISL_3870842 | 2021-09-02      |
| hCoV-19/Japan/PG-88040/2021 | EPI_ISL_3870843 | 2021-09-02      |
| hCoV-19/Japan/PG-88041/2021 | EPI_ISL_3870844 | 2021-09-02      |
| hCoV-19/Japan/PG-88042/2021 | EPI_ISL_3870845 | 2021-09-02      |
| hCoV-19/Japan/PG-88043/2021 | EPI_ISL_3870846 | 2021-09-02      |
| hCoV-19/Japan/PG-88044/2021 | EPI_ISL_3870847 | 2021-09-02      |
| hCoV-19/Japan/PG-88045/2021 | EPI_ISL_3870848 | 2021-09-02      |
| hCoV-19/Japan/PG-88046/2021 | EPI_ISL_3870849 | 2021-09-02      |
| hCoV-19/Japan/PG-88047/2021 | EPI_ISL_3870850 | 2021-09-02      |
| hCoV-19/Japan/PG-88048/2021 | EPI_ISL_3870851 | 2021-09-02      |
| hCoV-19/Japan/PG-88049/2021 | EPI_ISL_3870852 | 2021-09-02      |
| hCoV-19/Japan/PG-88050/2021 | EPI_ISL_3870853 | 2021-09-02      |
| hCoV-19/Japan/PG-88051/2021 | EPI_ISL_3870854 | 2021-09-02      |
| hCoV-19/Japan/PG-88052/2021 | EPI_ISL_3870855 | 2021-09-02      |
| hCoV-19/Japan/PG-88053/2021 | EPI_ISL_3870857 | 2021-09-02      |
| hCoV-19/Japan/PG-88054/2021 | EPI_ISL_3870859 | 2021-09-02      |
| hCoV-19/Japan/PG-88055/2021 | EPI_ISL_3873154 | 2021-09-02      |
| hCoV-19/Japan/PG-88056/2021 | EPI_ISL_3873155 | 2021-09-02      |
| hCoV-19/Japan/PG-88057/2021 | EPI_ISL_3873156 | 2021-09-02      |
| hCoV-19/Japan/PG-88058/2021 | EPI_ISL_3873157 | 2021-09-02      |
| hCoV-19/Japan/PG-88059/2021 | EPI_ISL_3873158 | 2021-09-02      |
| hCoV-19/Japan/PG-88060/2021 | EPI_ISL_3873159 | 2021-09-02      |
| hCoV-19/Japan/PG-88061/2021 | EPI_ISL_3873160 | 2021-09-02      |
| hCoV-19/Japan/PG-88062/2021 | EPI_ISL_3873161 | 2021-09-02      |
| hCoV-19/Japan/PG-88063/2021 | EPI_ISL_3873162 | 2021-09-02      |
| hCoV-19/Japan/PG-88064/2021 | EPI_ISL_3873163 | 2021-09-02      |
| hCoV-19/Japan/PG-88065/2021 | EPI_ISL_3873164 | 2021-09-02      |
| hCoV-19/Japan/PG-88066/2021 | EPI_ISL_3873165 | 2021-09-02      |
| hCoV-19/Japan/PG-88067/2021 | EPI_ISL_3873166 | 2021-09-02      |
| hCoV-19/Japan/PG-88068/2021 | EPI_ISL_3873167 | 2021-09-02      |
| hCoV-19/Japan/PG-88069/2021 | EPI_ISL_3873168 | 2021-09-02      |
| hCoV-19/Japan/PG-88070/2021 | EPI_ISL_3873169 | 2021-09-02      |
| hCoV-19/Japan/PG-88071/2021 | EPI_ISL_3873170 | 2021-09-02      |
| hCoV-19/Japan/PG-88072/2021 | EPI_ISL_3873171 | 2021-09-02      |
| hCoV-19/Japan/PG-88073/2021 | EPI_ISL_3873172 | 2021-09-02      |
| hCoV-19/Japan/PG-88074/2021 | EPI_ISL_3873173 | 2021-09-02      |
| hCoV-19/Japan/PG-88075/2021 | EPI_ISL_3873174 | 2021-09-02      |
| hCoV-19/Japan/PG-88076/2021 | EPI_ISL_3873175 | 2021-09-02      |
| hCoV-19/Japan/PG-88077/2021 | EPI_ISL_3873176 | 2021-09-02      |
| hCoV-19/Japan/PG-88078/2021 | EPI_ISL_3873177 | 2021-09-02      |
| hCoV-19/Japan/PG-88079/2021 | EPI_ISL_3873178 | 2021-09-02      |
| hCoV-19/Japan/PG-88080/2021 | EPI_ISL_3873179 | 2021-09-02      |
| hCoV-19/Japan/PG-88081/2021 | EPI_ISL_3873180 | 2021-09-02      |
| hCoV-19/Japan/PG-88082/2021 | EPI_ISL_3873181 | 2021-09-02      |
| hCoV-19/Japan/PG-88083/2021 | EPI_ISL_3873182 | 2021-09-02      |
| hCoV-19/Japan/PG-88084/2021 | EPI_ISL_3873183 | 2021-09-02      |
| hCoV-19/Japan/PG-88085/2021 | EPI_ISL_3873184 | 2021-09-02      |
| hCoV-19/Japan/PG-88086/2021 | EPI_ISL_3873185 | 2021-09-02      |
| hCoV-19/Japan/PG-88087/2021 | EPI_ISL_3873186 | 2021-09-02      |
| hCoV-19/Japan/PG-88088/2021 | EPI_ISL_3873187 | 2021-09-02      |
| hCoV-19/Japan/PG-88089/2021 | EPI_ISL_3873188 | 2021-09-02      |
| hCoV-19/Japan/PG-88090/2021 | EPI_ISL_3873189 | 2021-09-02      |
| hCoV-19/Japan/PG-88091/2021 | EPI_ISL_3873190 | 2021-09-02      |
| hCoV-19/Japan/PG-88092/2021 | EPI_ISL_3873191 | 2021-09-02      |

| virus_name                  | epiID           | submission_date |
|-----------------------------|-----------------|-----------------|
| hCoV-19/Japan/PG-88093/2021 | EPI_ISL_3873192 | 2021-09-02      |
| hCoV-19/Japan/PG-88094/2021 | EPI_ISL_3873193 | 2021-09-02      |
| hCoV-19/Japan/PG-88095/2021 | EPI_ISL_3873194 | 2021-09-02      |
| hCoV-19/Japan/PG-88096/2021 | EPI_ISL_3873195 | 2021-09-02      |
| hCoV-19/Japan/PG-88097/2021 | EPI_ISL_3873196 | 2021-09-02      |
| hCoV-19/Japan/PG-88098/2021 | EPI_ISL_3873197 | 2021-09-02      |
| hCoV-19/Japan/PG-88099/2021 | EPI_ISL_3873198 | 2021-09-02      |
| hCoV-19/Japan/PG-88100/2021 | EPI_ISL_3873199 | 2021-09-02      |
| hCoV-19/Japan/PG-88101/2021 | EPI_ISL_3873200 | 2021-09-02      |
| hCoV-19/Japan/PG-88102/2021 | EPI_ISL_3873201 | 2021-09-02      |
| hCoV-19/Japan/PG-88103/2021 | EPI_ISL_3873202 | 2021-09-02      |
| hCoV-19/Japan/PG-88104/2021 | EPI_ISL_3873203 | 2021-09-02      |
| hCoV-19/Japan/PG-88105/2021 | EPI_ISL_3873204 | 2021-09-02      |
| hCoV-19/Japan/PG-88106/2021 | EPI_ISL_3873205 | 2021-09-02      |
| hCoV-19/Japan/PG-88107/2021 | EPI_ISL_3873206 | 2021-09-02      |
| hCoV-19/Japan/PG-88108/2021 | EPI_ISL_3873207 | 2021-09-02      |
| hCoV-19/Japan/PG-88109/2021 | EPI_ISL_3873208 | 2021-09-02      |
| hCoV-19/Japan/PG-88110/2021 | EPI_ISL_3873209 | 2021-09-02      |
| hCoV-19/Japan/PG-88111/2021 | EPI_ISL_3873210 | 2021-09-02      |
| hCoV-19/Japan/PG-88112/2021 | EPI_ISL_3873211 | 2021-09-02      |
| hCoV-19/Japan/PG-88113/2021 | EPI_ISL_3873212 | 2021-09-02      |
| hCoV-19/Japan/PG-88114/2021 | EPI_ISL_3873213 | 2021-09-02      |
| hCoV-19/Japan/PG-88115/2021 | EPI_ISL_3873214 | 2021-09-02      |
| hCoV-19/Japan/PG-88116/2021 | EPI_ISL_3873215 | 2021-09-02      |
| hCoV-19/Japan/PG-88117/2021 | EPI_ISL_3873216 | 2021-09-02      |
| hCoV-19/Japan/PG-88118/2021 | EPI_ISL_3873217 | 2021-09-02      |
| hCoV-19/Japan/PG-88119/2021 | EPI_ISL_3873218 | 2021-09-02      |
| hCoV-19/Japan/PG-88120/2021 | EPI_ISL_3873219 | 2021-09-02      |
| hCoV-19/Japan/PG-88121/2021 | EPI_ISL_3873220 | 2021-09-02      |
| hCoV-19/Japan/PG-88122/2021 | EPI_ISL_3873221 | 2021-09-02      |
| hCoV-19/Japan/PG-88123/2021 | EPI_ISL_3873222 | 2021-09-02      |
| hCoV-19/Japan/PG-88124/2021 | EPI_ISL_3873223 | 2021-09-02      |
| hCoV-19/Japan/PG-88125/2021 | EPI_ISL_3873224 | 2021-09-02      |
| hCoV-19/Japan/PG-88126/2021 | EPI_ISL_3873225 | 2021-09-02      |
| hCoV-19/Japan/PG-88130/2021 | EPI_ISL_3873226 | 2021-09-02      |
| hCoV-19/Japan/PG-88131/2021 | EPI_ISL_3873227 | 2021-09-02      |
| hCoV-19/Japan/PG-88132/2021 | EPI_ISL_3873228 | 2021-09-02      |
| hCoV-19/Japan/PG-88133/2021 | EPI_ISL_3873229 | 2021-09-02      |
| hCoV-19/Japan/PG-88134/2021 | EPI_ISL_3873230 | 2021-09-02      |
| hCoV-19/Japan/PG-88135/2021 | EPI_ISL_3873231 | 2021-09-02      |
| hCoV-19/Japan/PG-88136/2021 | EPI_ISL_3871954 | 2021-09-02      |
| hCoV-19/Japan/PG-88137/2021 | EPI_ISL_3871955 | 2021-09-02      |
| hCoV-19/Japan/PG-88138/2021 | EPI_ISL_3871956 | 2021-09-02      |
| hCoV-19/Japan/PG-88139/2021 | EPI_ISL_3871957 | 2021-09-02      |
| hCoV-19/Japan/PG-88140/2021 | EPI_ISL_3871958 | 2021-09-02      |
| hCoV-19/Japan/PG-88141/2021 | EPI_ISL_3871959 | 2021-09-02      |
| hCoV-19/Japan/PG-88142/2021 | EPI_ISL_3871960 | 2021-09-02      |
| hCoV-19/Japan/PG-88143/2021 | EPI_ISL_3871961 | 2021-09-02      |
| hCoV-19/Japan/PG-88144/2021 | EPI_ISL_3871962 | 2021-09-02      |
| hCoV-19/Japan/PG-88145/2021 | EPI_ISL_3871963 | 2021-09-02      |
| hCoV-19/Japan/PG-88146/2021 | EPI_ISL_3871964 | 2021-09-02      |
| hCoV-19/Japan/PG-88147/2021 | EPI_ISL_3871965 | 2021-09-02      |
| hCoV-19/Japan/PG-88148/2021 | EPI_ISL_3871966 | 2021-09-02      |
| hCoV-19/Japan/PG-88149/2021 | EPI_ISL_3871110 | 2021-09-02      |

| virus_name                  | epiID           | submission_date |
|-----------------------------|-----------------|-----------------|
| hCoV-19/Japan/PG-88150/2021 | EPI_ISL_3871111 | 2021-09-02      |
| hCoV-19/Japan/PG-88151/2021 | EPI_ISL_3871112 | 2021-09-02      |
| hCoV-19/Japan/PG-88152/2021 | EPI_ISL_3871113 | 2021-09-02      |
| hCoV-19/Japan/PG-88153/2021 | EPI_ISL_3871114 | 2021-09-02      |
| hCoV-19/Japan/PG-88154/2021 | EPI_ISL_3871115 | 2021-09-02      |
| hCoV-19/Japan/PG-88155/2021 | EPI_ISL_3871116 | 2021-09-02      |
| hCoV-19/Japan/PG-88156/2021 | EPI_ISL_3871117 | 2021-09-02      |
| hCoV-19/Japan/PG-88157/2021 | EPI_ISL_3871118 | 2021-09-02      |
| hCoV-19/Japan/PG-88158/2021 | EPI_ISL_3871119 | 2021-09-02      |
| hCoV-19/Japan/PG-88159/2021 | EPI_ISL_3899788 | 2021-09-02      |
| hCoV-19/Japan/PG-88160/2021 | EPI_ISL_3899791 | 2021-09-02      |
| hCoV-19/Japan/PG-88161/2021 | EPI_ISL_3899794 | 2021-09-02      |
| hCoV-19/Japan/PG-88162/2021 | EPI_ISL_3899797 | 2021-09-02      |
| hCoV-19/Japan/PG-88163/2021 | EPI_ISL_3899800 | 2021-09-02      |
| hCoV-19/Japan/PG-88164/2021 | EPI_ISL_3899801 | 2021-09-02      |
| hCoV-19/Japan/PG-88165/2021 | EPI_ISL_3899802 | 2021-09-02      |
| hCoV-19/Japan/PG-88166/2021 | EPI_ISL_3899805 | 2021-09-02      |
| hCoV-19/Japan/PG-88167/2021 | EPI_ISL_3899808 | 2021-09-02      |
| hCoV-19/Japan/PG-88168/2021 | EPI_ISL_3899811 | 2021-09-02      |
| hCoV-19/Japan/PG-88169/2021 | EPI_ISL_3899813 | 2021-09-02      |
| hCoV-19/Japan/PG-88170/2021 | EPI_ISL_3899814 | 2021-09-02      |
| hCoV-19/Japan/PG-88171/2021 | EPI_ISL_3899816 | 2021-09-02      |
| hCoV-19/Japan/PG-88172/2021 | EPI_ISL_3899819 | 2021-09-02      |
| hCoV-19/Japan/PG-88173/2021 | EPI_ISL_3899821 | 2021-09-02      |
| hCoV-19/Japan/PG-88174/2021 | EPI_ISL_3899822 | 2021-09-02      |
| hCoV-19/Japan/PG-88175/2021 | EPI_ISL_3899823 | 2021-09-02      |
| hCoV-19/Japan/PG-88176/2021 | EPI_ISL_3899824 | 2021-09-02      |
| hCoV-19/Japan/PG-88177/2021 | EPI_ISL_3899825 | 2021-09-02      |
| hCoV-19/Japan/PG-88178/2021 | EPI_ISL_3899826 | 2021-09-02      |
| hCoV-19/Japan/PG-88179/2021 | EPI_ISL_3899827 | 2021-09-02      |
| hCoV-19/Japan/PG-88180/2021 | EPI_ISL_3899828 | 2021-09-02      |
| hCoV-19/Japan/PG-88181/2021 | EPI_ISL_3899829 | 2021-09-02      |
| hCoV-19/Japan/PG-88182/2021 | EPI_ISL_3899830 | 2021-09-02      |
| hCoV-19/Japan/PG-88183/2021 | EPI_ISL_3899831 | 2021-09-02      |
| hCoV-19/Japan/PG-88184/2021 | EPI_ISL_3899832 | 2021-09-02      |
| hCoV-19/Japan/PG-88185/2021 | EPI_ISL_3899833 | 2021-09-02      |
| hCoV-19/Japan/PG-88186/2021 | EPI_ISL_3899834 | 2021-09-02      |
| hCoV-19/Japan/PG-88187/2021 | EPI_ISL_3899835 | 2021-09-02      |
| hCoV-19/Japan/PG-88188/2021 | EPI_ISL_3899836 | 2021-09-02      |
| hCoV-19/Japan/PG-88189/2021 | EPI_ISL_3899837 | 2021-09-02      |
| hCoV-19/Japan/PG-88190/2021 | EPI_ISL_3899838 | 2021-09-02      |
| hCoV-19/Japan/PG-88191/2021 | EPI_ISL_3899839 | 2021-09-02      |
| hCoV-19/Japan/PG-88192/2021 | EPI_ISL_3899840 | 2021-09-02      |
| hCoV-19/Japan/PG-88193/2021 | EPI_ISL_3899841 | 2021-09-02      |
| hCoV-19/Japan/PG-88194/2021 | EPI_ISL_3899842 | 2021-09-02      |
| hCoV-19/Japan/PG-88195/2021 | EPI_ISL_3899843 | 2021-09-02      |
| hCoV-19/Japan/PG-88196/2021 | EPI_ISL_3899844 | 2021-09-02      |
| hCoV-19/Japan/PG-88197/2021 | EPI_ISL_3899845 | 2021-09-02      |
| hCoV-19/Japan/PG-88198/2021 | EPI_ISL_3899846 | 2021-09-02      |
| hCoV-19/Japan/PG-88199/2021 | EPI_ISL_3899847 | 2021-09-02      |
| hCoV-19/Japan/PG-88200/2021 | EPI_ISL_3899848 | 2021-09-02      |
| hCoV-19/Japan/PG-88201/2021 | EPI_ISL_3899849 | 2021-09-02      |
| hCoV-19/Japan/PG-88202/2021 | EPI_ISL_3899850 | 2021-09-02      |
| hCoV-19/Japan/PG-88203/2021 | EPI_ISL_3899851 | 2021-09-02      |

| virus_name                  | epiID           | submission_date |
|-----------------------------|-----------------|-----------------|
| hCoV-19/Japan/PG-88204/2021 | EPI_ISL_3899853 | 2021-09-02      |
| hCoV-19/Japan/PG-88205/2021 | EPI_ISL_3899856 | 2021-09-02      |
| hCoV-19/Japan/PG-88206/2021 | EPI_ISL_3899859 | 2021-09-02      |
| hCoV-19/Japan/PG-88207/2021 | EPI_ISL_3899862 | 2021-09-02      |
| hCoV-19/Japan/PG-88208/2021 | EPI_ISL_3899865 | 2021-09-02      |
| hCoV-19/Japan/PG-88209/2021 | EPI_ISL_3899868 | 2021-09-02      |
| hCoV-19/Japan/PG-88210/2021 | EPI_ISL_3899872 | 2021-09-02      |
| hCoV-19/Japan/PG-88211/2021 | EPI_ISL_3899875 | 2021-09-02      |
| hCoV-19/Japan/PG-88212/2021 | EPI_ISL_3899878 | 2021-09-02      |
| hCoV-19/Japan/PG-88213/2021 | EPI_ISL_3899881 | 2021-09-02      |
| hCoV-19/Japan/PG-88214/2021 | EPI_ISL_3899884 | 2021-09-02      |
| hCoV-19/Japan/PG-88215/2021 | EPI_ISL_3899887 | 2021-09-02      |
| hCoV-19/Japan/PG-88216/2021 | EPI_ISL_3899891 | 2021-09-02      |
| hCoV-19/Japan/PG-88217/2021 | EPI_ISL_3899894 | 2021-09-02      |
| hCoV-19/Japan/PG-88218/2021 | EPI_ISL_3899898 | 2021-09-02      |
| hCoV-19/Japan/PG-88219/2021 | EPI_ISL_3899901 | 2021-09-02      |
| hCoV-19/Japan/PG-88220/2021 | EPI_ISL_3899904 | 2021-09-02      |
| hCoV-19/Japan/PG-88221/2021 | EPI_ISL_3899907 | 2021-09-02      |
| hCoV-19/Japan/PG-88222/2021 | EPI_ISL_3899910 | 2021-09-02      |
| hCoV-19/Japan/PG-88223/2021 | EPI_ISL_3899914 | 2021-09-02      |
| hCoV-19/Japan/PG-88224/2021 | EPI_ISL_3899917 | 2021-09-02      |
| hCoV-19/Japan/PG-88225/2021 | EPI_ISL_3899920 | 2021-09-02      |
| hCoV-19/Japan/PG-88226/2021 | EPI_ISL_3899923 | 2021-09-02      |
| hCoV-19/Japan/PG-88227/2021 | EPI_ISL_3899925 | 2021-09-02      |
| hCoV-19/Japan/PG-88228/2021 | EPI_ISL_3899929 | 2021-09-02      |
| hCoV-19/Japan/PG-88229/2021 | EPI_ISL_3899931 | 2021-09-02      |
| hCoV-19/Japan/PG-88230/2021 | EPI_ISL_3899935 | 2021-09-02      |
| hCoV-19/Japan/PG-88231/2021 | EPI_ISL_3899938 | 2021-09-02      |
| hCoV-19/Japan/PG-88232/2021 | EPI_ISL_3899941 | 2021-09-02      |
| hCoV-19/Japan/PG-88233/2021 | EPI_ISL_3899945 | 2021-09-02      |
| hCoV-19/Japan/PG-88234/2021 | EPI_ISL_3899948 | 2021-09-02      |
| hCoV-19/Japan/PG-88235/2021 | EPI_ISL_3899951 | 2021-09-02      |
| hCoV-19/Japan/PG-88236/2021 | EPI_ISL_3899954 | 2021-09-02      |
| hCoV-19/Japan/PG-88237/2021 | EPI_ISL_3899957 | 2021-09-02      |
| hCoV-19/Japan/PG-88238/2021 | EPI_ISL_3899958 | 2021-09-02      |
| hCoV-19/Japan/PG-88239/2021 | EPI_ISL_3899959 | 2021-09-02      |
| hCoV-19/Japan/PG-88240/2021 | EPI_ISL_3899960 | 2021-09-02      |
| hCoV-19/Japan/PG-88241/2021 | EPI_ISL_3899961 | 2021-09-02      |
| hCoV-19/Japan/PG-88242/2021 | EPI_ISL_3899963 | 2021-09-02      |
| hCoV-19/Japan/PG-88243/2021 | EPI_ISL_3899964 | 2021-09-02      |
| hCoV-19/Japan/PG-88244/2021 | EPI_ISL_3899965 | 2021-09-02      |
| hCoV-19/Japan/PG-88245/2021 | EPI_ISL_3899966 | 2021-09-02      |
| hCoV-19/Japan/PG-88246/2021 | EPI_ISL_3899967 | 2021-09-02      |
| hCoV-19/Japan/PG-88247/2021 | EPI_ISL_3899968 | 2021-09-02      |
| hCoV-19/Japan/PG-88248/2021 | EPI_ISL_3899969 | 2021-09-02      |
| hCoV-19/Japan/PG-88249/2021 | EPI_ISL_3899970 | 2021-09-02      |
| hCoV-19/Japan/PG-88250/2021 | EPI_ISL_3899971 | 2021-09-02      |
| hCoV-19/Japan/PG-88251/2021 | EPI_ISL_3899972 | 2021-09-02      |
| hCoV-19/Japan/PG-88252/2021 | EPI_ISL_3899973 | 2021-09-02      |
| hCoV-19/Japan/PG-88253/2021 | EPI_ISL_3899974 | 2021-09-02      |
| hCoV-19/Japan/PG-88254/2021 | EPI_ISL_3899975 | 2021-09-02      |
| hCoV-19/Japan/PG-88255/2021 | EPI_ISL_3899976 | 2021-09-02      |
| hCoV-19/Japan/PG-88256/2021 | EPI_ISL_3899977 | 2021-09-02      |
| hCoV-19/Japan/PG-88257/2021 | EPI_ISL_3899978 | 2021-09-02      |

| virus_name                  | epiID           | submission_date |
|-----------------------------|-----------------|-----------------|
| hCoV-19/Japan/PG-88258/2021 | EPI_ISL_3899979 | 2021-09-02      |
| hCoV-19/Japan/PG-88259/2021 | EPI_ISL_3899980 | 2021-09-02      |
| hCoV-19/Japan/PG-88260/2021 | EPI_ISL_3899981 | 2021-09-02      |
| hCoV-19/Japan/PG-88261/2021 | EPI_ISL_3899982 | 2021-09-02      |
| hCoV-19/Japan/PG-88262/2021 | EPI_ISL_3899983 | 2021-09-02      |
| hCoV-19/Japan/PG-88263/2021 | EPI_ISL_3899984 | 2021-09-02      |
| hCoV-19/Japan/PG-88264/2021 | EPI_ISL_3899985 | 2021-09-02      |
| hCoV-19/Japan/PG-88265/2021 | EPI_ISL_3899986 | 2021-09-02      |
| hCoV-19/Japan/PG-88266/2021 | EPI_ISL_3899987 | 2021-09-02      |
| hCoV-19/Japan/PG-88267/2021 | EPI_ISL_3899988 | 2021-09-02      |
| hCoV-19/Japan/PG-88268/2021 | EPI_ISL_3899989 | 2021-09-02      |
| hCoV-19/Japan/PG-88269/2021 | EPI_ISL_3899990 | 2021-09-02      |
| hCoV-19/Japan/PG-88270/2021 | EPI_ISL_3899991 | 2021-09-02      |
| hCoV-19/Japan/PG-88271/2021 | EPI_ISL_3899992 | 2021-09-02      |
| hCoV-19/Japan/PG-88272/2021 | EPI_ISL_3899993 | 2021-09-02      |
| hCoV-19/Japan/PG-88273/2021 | EPI_ISL_3899994 | 2021-09-02      |
| hCoV-19/Japan/PG-88274/2021 | EPI_ISL_3899995 | 2021-09-02      |
| hCoV-19/Japan/PG-88275/2021 | EPI_ISL_3899996 | 2021-09-02      |
| hCoV-19/Japan/PG-88276/2021 | EPI_ISL_3899997 | 2021-09-02      |
| hCoV-19/Japan/PG-88277/2021 | EPI_ISL_3899998 | 2021-09-02      |
| hCoV-19/Japan/PG-88278/2021 | EPI_ISL_3899999 | 2021-09-02      |
| hCoV-19/Japan/PG-88279/2021 | EPI_ISL_3900000 | 2021-09-02      |
| hCoV-19/Japan/PG-88280/2021 | EPI_ISL_3900001 | 2021-09-02      |
| hCoV-19/Japan/PG-88281/2021 | EPI_ISL_3900002 | 2021-09-02      |
| hCoV-19/Japan/PG-88282/2021 | EPI_ISL_3900003 | 2021-09-02      |
| hCoV-19/Japan/PG-88283/2021 | EPI_ISL_3900004 | 2021-09-02      |
| hCoV-19/Japan/PG-88284/2021 | EPI_ISL_3900005 | 2021-09-02      |
| hCoV-19/Japan/PG-88285/2021 | EPI_ISL_3900006 | 2021-09-02      |
| hCoV-19/Japan/PG-88286/2021 | EPI_ISL_3900007 | 2021-09-02      |
| hCoV-19/Japan/PG-88287/2021 | EPI_ISL_3900008 | 2021-09-02      |
| hCoV-19/Japan/PG-88288/2021 | EPI_ISL_3900009 | 2021-09-02      |
| hCoV-19/Japan/PG-88289/2021 | EPI_ISL_3900010 | 2021-09-02      |
| hCoV-19/Japan/PG-88290/2021 | EPI_ISL_3900011 | 2021-09-02      |
| hCoV-19/Japan/PG-88291/2021 | EPI_ISL_3900012 | 2021-09-02      |
| hCoV-19/Japan/PG-88292/2021 | EPI_ISL_3900013 | 2021-09-02      |
| hCoV-19/Japan/PG-88293/2021 | EPI_ISL_3900014 | 2021-09-02      |
| hCoV-19/Japan/PG-88294/2021 | EPI_ISL_3900015 | 2021-09-02      |
| hCoV-19/Japan/PG-88295/2021 | EPI_ISL_3900016 | 2021-09-02      |
| hCoV-19/Japan/PG-88296/2021 | EPI_ISL_3900017 | 2021-09-02      |
| hCoV-19/Japan/PG-88297/2021 | EPI_ISL_3900018 | 2021-09-02      |
| hCoV-19/Japan/PG-88298/2021 | EPI_ISL_3900019 | 2021-09-02      |
| hCoV-19/Japan/PG-88299/2021 | EPI_ISL_3900020 | 2021-09-02      |
| hCoV-19/Japan/PG-88300/2021 | EPI_ISL_3900021 | 2021-09-02      |
| hCoV-19/Japan/PG-88301/2021 | EPI_ISL_3900022 | 2021-09-02      |
| hCoV-19/Japan/PG-88302/2021 | EPI_ISL_3900023 | 2021-09-02      |
| hCoV-19/Japan/PG-88303/2021 | EPI_ISL_3900024 | 2021-09-02      |
| hCoV-19/Japan/PG-88304/2021 | EPI_ISL_3900025 | 2021-09-02      |
| hCoV-19/Japan/PG-88305/2021 | EPI_ISL_3900026 | 2021-09-02      |
| hCoV-19/Japan/PG-88306/2021 | EPI_ISL_3900027 | 2021-09-02      |
| hCoV-19/Japan/PG-88307/2021 | EPI_ISL_3900028 | 2021-09-02      |
| hCoV-19/Japan/PG-88308/2021 | EPI_ISL_3900029 | 2021-09-02      |
| hCoV-19/Japan/PG-88309/2021 | EPI_ISL_3900030 | 2021-09-02      |
| hCoV-19/Japan/PG-88310/2021 | EPI_ISL_3900031 | 2021-09-02      |
| hCoV-19/Japan/PG-88311/2021 | EPI_ISL_3900032 | 2021-09-02      |

| virus_name                  | epiID           | submission_date |
|-----------------------------|-----------------|-----------------|
| hCoV-19/Japan/PG-88312/2021 | EPI_ISL_3900033 | 2021-09-02      |
| hCoV-19/Japan/PG-88313/2021 | EPI_ISL_3900034 | 2021-09-02      |
| hCoV-19/Japan/PG-88314/2021 | EPI_ISL_3900035 | 2021-09-02      |
| hCoV-19/Japan/PG-88315/2021 | EPI_ISL_3900036 | 2021-09-02      |
| hCoV-19/Japan/PG-88316/2021 | EPI_ISL_3900037 | 2021-09-02      |
| hCoV-19/Japan/PG-88317/2021 | EPI_ISL_3900038 | 2021-09-02      |
| hCoV-19/Japan/PG-88318/2021 | EPI_ISL_3900039 | 2021-09-02      |
| hCoV-19/Japan/PG-88319/2021 | EPI_ISL_3900040 | 2021-09-02      |
| hCoV-19/Japan/PG-88320/2021 | EPI_ISL_3900041 | 2021-09-02      |
| hCoV-19/Japan/PG-88321/2021 | EPI_ISL_3900042 | 2021-09-02      |
| hCoV-19/Japan/PG-88322/2021 | EPI_ISL_3900043 | 2021-09-02      |
| hCoV-19/Japan/PG-88323/2021 | EPI_ISL_3900044 | 2021-09-02      |
| hCoV-19/Japan/PG-88324/2021 | EPI_ISL_3900045 | 2021-09-02      |
| hCoV-19/Japan/PG-88325/2021 | EPI_ISL_3900046 | 2021-09-02      |
| hCoV-19/Japan/PG-88326/2021 | EPI_ISL_3900047 | 2021-09-02      |
| hCoV-19/Japan/PG-88327/2021 | EPI_ISL_3900048 | 2021-09-02      |
| hCoV-19/Japan/PG-88328/2021 | EPI_ISL_3900049 | 2021-09-02      |
| hCoV-19/Japan/PG-88329/2021 | EPI_ISL_3900050 | 2021-09-02      |
| hCoV-19/Japan/PG-88330/2021 | EPI_ISL_3900051 | 2021-09-02      |
| hCoV-19/Japan/PG-88331/2021 | EPI_ISL_3900052 | 2021-09-02      |
| hCoV-19/Japan/PG-88332/2021 | EPI_ISL_3900053 | 2021-09-02      |
| hCoV-19/Japan/PG-88333/2021 | EPI_ISL_3900054 | 2021-09-02      |
| hCoV-19/Japan/PG-88334/2021 | EPI_ISL_3900055 | 2021-09-02      |
| hCoV-19/Japan/PG-88335/2021 | EPI_ISL_3900056 | 2021-09-02      |
| hCoV-19/Japan/PG-88336/2021 | EPI_ISL_3900057 | 2021-09-02      |
| hCoV-19/Japan/PG-88337/2021 | EPI_ISL_3900058 | 2021-09-02      |
| hCoV-19/Japan/PG-88338/2021 | EPI_ISL_3900059 | 2021-09-02      |
| hCoV-19/Japan/PG-88339/2021 | EPI_ISL_3900060 | 2021-09-02      |
| hCoV-19/Japan/PG-88340/2021 | EPI_ISL_3900061 | 2021-09-02      |
| hCoV-19/Japan/PG-88341/2021 | EPI_ISL_3900062 | 2021-09-02      |
| hCoV-19/Japan/PG-88342/2021 | EPI_ISL_3900063 | 2021-09-02      |
| hCoV-19/Japan/PG-88343/2021 | EPI_ISL_3900064 | 2021-09-02      |
| hCoV-19/Japan/PG-88344/2021 | EPI_ISL_3900065 | 2021-09-02      |
| hCoV-19/Japan/PG-88345/2021 | EPI_ISL_3900066 | 2021-09-02      |
| hCoV-19/Japan/PG-88346/2021 | EPI_ISL_3900067 | 2021-09-02      |
| hCoV-19/Japan/PG-88347/2021 | EPI_ISL_3900068 | 2021-09-02      |
| hCoV-19/Japan/PG-88348/2021 | EPI_ISL_3900069 | 2021-09-02      |
| hCoV-19/Japan/PG-88349/2021 | EPI_ISL_3900070 | 2021-09-02      |
| hCoV-19/Japan/PG-88350/2021 | EPI_ISL_3900071 | 2021-09-02      |
| hCoV-19/Japan/PG-88351/2021 | EPI_ISL_3900072 | 2021-09-02      |
| hCoV-19/Japan/PG-88352/2021 | EPI_ISL_3900073 | 2021-09-02      |
| hCoV-19/Japan/PG-88353/2021 | EPI_ISL_3900074 | 2021-09-02      |
| hCoV-19/Japan/PG-88354/2021 | EPI_ISL_3900075 | 2021-09-02      |
| hCoV-19/Japan/PG-88355/2021 | EPI_ISL_3900076 | 2021-09-02      |
| hCoV-19/Japan/PG-88356/2021 | EPI_ISL_3900077 | 2021-09-02      |
| hCoV-19/Japan/PG-88357/2021 | EPI_ISL_3900078 | 2021-09-02      |
| hCoV-19/Japan/PG-88358/2021 | EPI_ISL_3900079 | 2021-09-02      |
| hCoV-19/Japan/PG-88359/2021 | EPI_ISL_3900080 | 2021-09-02      |
| hCoV-19/Japan/PG-88360/2021 | EPI_ISL_3900081 | 2021-09-02      |
| hCoV-19/Japan/PG-88361/2021 | EPI_ISL_3900082 | 2021-09-02      |
| hCoV-19/Japan/PG-88362/2021 | EPI_ISL_3900083 | 2021-09-02      |
| hCoV-19/Japan/PG-88363/2021 | EPI_ISL_3900084 | 2021-09-02      |
| hCoV-19/Japan/PG-88364/2021 | EPI_ISL_3900085 | 2021-09-02      |
| hCoV-19/Japan/PG-88365/2021 | EPI_ISL_3900086 | 2021-09-02      |



| virus_name                  | epiID           | submission_date |
|-----------------------------|-----------------|-----------------|
| hCoV-19/Japan/PG-88366/2021 | EPI_ISL_3900087 | 2021-09-02      |
| hCoV-19/Japan/PG-88367/2021 | EPI_ISL_3900088 | 2021-09-02      |
| hCoV-19/Japan/PG-88368/2021 | EPI_ISL_3900089 | 2021-09-02      |
| hCoV-19/Japan/PG-88369/2021 | EPI_ISL_3900090 | 2021-09-02      |
| hCoV-19/Japan/PG-88370/2021 | EPI_ISL_3900091 | 2021-09-02      |
| hCoV-19/Japan/PG-88371/2021 | EPI_ISL_3900092 | 2021-09-02      |
| hCoV-19/Japan/PG-88372/2021 | EPI_ISL_3900093 | 2021-09-02      |
| hCoV-19/Japan/PG-88373/2021 | EPI_ISL_3900094 | 2021-09-02      |
| hCoV-19/Japan/PG-88374/2021 | EPI_ISL_3900095 | 2021-09-02      |
| hCoV-19/Japan/PG-88375/2021 | EPI_ISL_3900096 | 2021-09-02      |
| hCoV-19/Japan/PG-88376/2021 | EPI_ISL_3900097 | 2021-09-02      |
| hCoV-19/Japan/PG-88377/2021 | EPI_ISL_3900098 | 2021-09-02      |
| hCoV-19/Japan/PG-88378/2021 | EPI_ISL_3900099 | 2021-09-02      |
| hCoV-19/Japan/PG-88379/2021 | EPI_ISL_3900100 | 2021-09-02      |
| hCoV-19/Japan/PG-88380/2021 | EPI_ISL_3900101 | 2021-09-02      |
| hCoV-19/Japan/PG-88381/2021 | EPI_ISL_3900102 | 2021-09-02      |
| hCoV-19/Japan/PG-88382/2021 | EPI_ISL_3900103 | 2021-09-02      |
| hCoV-19/Japan/PG-88383/2021 | EPI_ISL_3900104 | 2021-09-02      |
| hCoV-19/Japan/PG-88384/2021 | EPI_ISL_3900105 | 2021-09-02      |
| hCoV-19/Japan/PG-88385/2021 | EPI_ISL_3900106 | 2021-09-02      |
| hCoV-19/Japan/PG-88386/2021 | EPI_ISL_3900107 | 2021-09-02      |
| hCoV-19/Japan/PG-88387/2021 | EPI_ISL_3900108 | 2021-09-02      |
| hCoV-19/Japan/PG-88388/2021 | EPI_ISL_3900109 | 2021-09-02      |
| hCoV-19/Japan/PG-88389/2021 | EPI_ISL_3900110 | 2021-09-02      |
| hCoV-19/Japan/PG-88390/2021 | EPI_ISL_3900111 | 2021-09-02      |
| hCoV-19/Japan/PG-88391/2021 | EPI_ISL_3900112 | 2021-09-02      |
| hCoV-19/Japan/PG-88392/2021 | EPI_ISL_3900113 | 2021-09-02      |
| hCoV-19/Japan/PG-88393/2021 | EPI_ISL_3900114 | 2021-09-02      |
| hCoV-19/Japan/PG-88394/2021 | EPI_ISL_3900115 | 2021-09-02      |
| hCoV-19/Japan/PG-88395/2021 | EPI_ISL_3900116 | 2021-09-02      |
| hCoV-19/Japan/PG-88396/2021 | EPI_ISL_3900117 | 2021-09-02      |
| hCoV-19/Japan/PG-88397/2021 | EPI_ISL_3900118 | 2021-09-02      |
| hCoV-19/Japan/PG-88398/2021 | EPI_ISL_3900119 | 2021-09-02      |
| hCoV-19/Japan/PG-88399/2021 | EPI_ISL_3900120 | 2021-09-02      |
| hCoV-19/Japan/PG-88400/2021 | EPI_ISL_3900121 | 2021-09-02      |
| hCoV-19/Japan/PG-88401/2021 | EPI_ISL_3900122 | 2021-09-02      |
| hCoV-19/Japan/PG-88402/2021 | EPI_ISL_3900123 | 2021-09-02      |
| hCoV-19/Japan/PG-88403/2021 | EPI_ISL_3900124 | 2021-09-02      |
| hCoV-19/Japan/PG-88404/2021 | EPI_ISL_3900125 | 2021-09-02      |
| hCoV-19/Japan/PG-88405/2021 | EPI_ISL_3900126 | 2021-09-02      |
| hCoV-19/Japan/PG-88406/2021 | EPI_ISL_3900127 | 2021-09-02      |
| hCoV-19/Japan/PG-88407/2021 | EPI_ISL_3900128 | 2021-09-02      |
| hCoV-19/Japan/PG-88408/2021 | EPI_ISL_3900129 | 2021-09-02      |
| hCoV-19/Japan/PG-88409/2021 | EPI_ISL_3900130 | 2021-09-02      |
| hCoV-19/Japan/PG-88410/2021 | EPI_ISL_3900131 | 2021-09-02      |
| hCoV-19/Japan/PG-88411/2021 | EPI_ISL_3900132 | 2021-09-02      |
| hCoV-19/Japan/PG-88412/2021 | EPI_ISL_3900133 | 2021-09-02      |
| hCoV-19/Japan/PG-88413/2021 | EPI_ISL_3900134 | 2021-09-02      |
| hCoV-19/Japan/PG-88414/2021 | EPI_ISL_3900135 | 2021-09-02      |
| hCoV-19/Japan/PG-88415/2021 | EPI_ISL_3900136 | 2021-09-02      |
| hCoV-19/Japan/PG-88416/2021 | EPI_ISL_3900137 | 2021-09-02      |
| hCoV-19/Japan/PG-88417/2021 | EPI_ISL_3900138 | 2021-09-02      |
| hCoV-19/Japan/PG-88418/2021 | EPI_ISL_3900139 | 2021-09-02      |
| hCoV-19/Japan/PG-88419/2021 | EPI_ISL_3900140 | 2021-09-02      |

| virus_name                  | epiID           | submission_date |
|-----------------------------|-----------------|-----------------|
| hCoV-19/Japan/PG-88420/2021 | EPI_ISL_3900141 | 2021-09-02      |
| hCoV-19/Japan/PG-88421/2021 | EPI_ISL_3900142 | 2021-09-02      |
| hCoV-19/Japan/PG-88422/2021 | EPI_ISL_3900144 | 2021-09-02      |
| hCoV-19/Japan/PG-88423/2021 | EPI_ISL_3900145 | 2021-09-02      |
| hCoV-19/Japan/PG-88424/2021 | EPI_ISL_3900146 | 2021-09-02      |
| hCoV-19/Japan/PG-88425/2021 | EPI_ISL_3900147 | 2021-09-02      |
| hCoV-19/Japan/PG-88426/2021 | EPI_ISL_3900148 | 2021-09-02      |
| hCoV-19/Japan/PG-88427/2021 | EPI_ISL_3900149 | 2021-09-02      |
| hCoV-19/Japan/PG-88428/2021 | EPI_ISL_3900150 | 2021-09-02      |
| hCoV-19/Japan/PG-88429/2021 | EPI_ISL_3900151 | 2021-09-02      |
| hCoV-19/Japan/PG-88430/2021 | EPI_ISL_3900152 | 2021-09-02      |
| hCoV-19/Japan/PG-88431/2021 | EPI_ISL_3900153 | 2021-09-02      |
| hCoV-19/Japan/PG-88432/2021 | EPI_ISL_3900154 | 2021-09-02      |
| hCoV-19/Japan/PG-88433/2021 | EPI_ISL_3900155 | 2021-09-02      |
| hCoV-19/Japan/PG-88434/2021 | EPI_ISL_3900156 | 2021-09-02      |
| hCoV-19/Japan/PG-88435/2021 | EPI_ISL_3900157 | 2021-09-02      |
| hCoV-19/Japan/PG-88436/2021 | EPI_ISL_3900158 | 2021-09-02      |
| hCoV-19/Japan/PG-88437/2021 | EPI_ISL_3900159 | 2021-09-02      |
| hCoV-19/Japan/PG-88438/2021 | EPI_ISL_3900160 | 2021-09-02      |
| hCoV-19/Japan/PG-88439/2021 | EPI_ISL_3900161 | 2021-09-02      |
| hCoV-19/Japan/PG-88440/2021 | EPI_ISL_3900162 | 2021-09-02      |
| hCoV-19/Japan/PG-88441/2021 | EPI_ISL_3900163 | 2021-09-02      |
| hCoV-19/Japan/PG-88442/2021 | EPI_ISL_3900164 | 2021-09-02      |
| hCoV-19/Japan/PG-88443/2021 | EPI_ISL_3900165 | 2021-09-02      |
| hCoV-19/Japan/PG-88444/2021 | EPI_ISL_3900166 | 2021-09-02      |
| hCoV-19/Japan/PG-88445/2021 | EPI_ISL_3900167 | 2021-09-02      |
| hCoV-19/Japan/PG-88446/2021 | EPI_ISL_3900168 | 2021-09-02      |
| hCoV-19/Japan/PG-88447/2021 | EPI_ISL_3900169 | 2021-09-02      |
| hCoV-19/Japan/PG-88448/2021 | EPI_ISL_3900170 | 2021-09-02      |
| hCoV-19/Japan/PG-88449/2021 | EPI_ISL_3900171 | 2021-09-02      |
| hCoV-19/Japan/PG-88450/2021 | EPI_ISL_3900172 | 2021-09-02      |
| hCoV-19/Japan/PG-88451/2021 | EPI_ISL_3900173 | 2021-09-02      |
| hCoV-19/Japan/PG-88452/2021 | EPI_ISL_3900174 | 2021-09-02      |
| hCoV-19/Japan/PG-88453/2021 | EPI_ISL_3900175 | 2021-09-02      |
| hCoV-19/Japan/PG-88454/2021 | EPI_ISL_3900176 | 2021-09-02      |
| hCoV-19/Japan/PG-88455/2021 | EPI_ISL_3900177 | 2021-09-02      |
| hCoV-19/Japan/PG-88456/2021 | EPI_ISL_3900178 | 2021-09-02      |
| hCoV-19/Japan/PG-88457/2021 | EPI_ISL_3900179 | 2021-09-02      |
| hCoV-19/Japan/PG-88458/2021 | EPI_ISL_3900180 | 2021-09-02      |
| hCoV-19/Japan/PG-88459/2021 | EPI_ISL_3900181 | 2021-09-02      |
| hCoV-19/Japan/PG-88460/2021 | EPI_ISL_3900182 | 2021-09-02      |
| hCoV-19/Japan/PG-88461/2021 | EPI_ISL_3900183 | 2021-09-02      |
| hCoV-19/Japan/PG-88462/2021 | EPI_ISL_3900184 | 2021-09-02      |
| hCoV-19/Japan/PG-88463/2021 | EPI_ISL_3900185 | 2021-09-02      |
| hCoV-19/Japan/PG-88464/2021 | EPI_ISL_3900186 | 2021-09-02      |
| hCoV-19/Japan/PG-88465/2021 | EPI_ISL_3900187 | 2021-09-02      |
| hCoV-19/Japan/PG-88466/2021 | EPI_ISL_3900188 | 2021-09-02      |
| hCoV-19/Japan/PG-88467/2021 | EPI_ISL_3900189 | 2021-09-02      |
| hCoV-19/Japan/PG-88468/2021 | EPI_ISL_3900190 | 2021-09-02      |
| hCoV-19/Japan/PG-88469/2021 | EPI_ISL_3900191 | 2021-09-02      |
| hCoV-19/Japan/PG-88470/2021 | EPI_ISL_3900192 | 2021-09-02      |
| hCoV-19/Japan/PG-88471/2021 | EPI_ISL_3900193 | 2021-09-02      |
| hCoV-19/Japan/PG-88472/2021 | EPI_ISL_3900194 | 2021-09-02      |
| hCoV-19/Japan/PG-88473/2021 | EPI_ISL_3900195 | 2021-09-02      |

| virus_name                  | epiID           | submission_date |
|-----------------------------|-----------------|-----------------|
| hCoV-19/Japan/PG-88474/2021 | EPI_ISL_3900196 | 2021-09-02      |
| hCoV-19/Japan/PG-88475/2021 | EPI_ISL_3900197 | 2021-09-02      |
| hCoV-19/Japan/PG-88476/2021 | EPI_ISL_3900198 | 2021-09-02      |
| hCoV-19/Japan/PG-88477/2021 | EPI_ISL_3900199 | 2021-09-02      |
| hCoV-19/Japan/PG-88478/2021 | EPI_ISL_3900200 | 2021-09-02      |
| hCoV-19/Japan/PG-88479/2021 | EPI_ISL_3900201 | 2021-09-02      |
| hCoV-19/Japan/PG-88480/2021 | EPI_ISL_3900202 | 2021-09-02      |
| hCoV-19/Japan/PG-88481/2021 | EPI_ISL_3900203 | 2021-09-02      |
| hCoV-19/Japan/PG-88482/2021 | EPI_ISL_3900204 | 2021-09-02      |
| hCoV-19/Japan/PG-88483/2021 | EPI_ISL_3900205 | 2021-09-02      |
| hCoV-19/Japan/PG-88484/2021 | EPI_ISL_3900206 | 2021-09-02      |
| hCoV-19/Japan/PG-88485/2021 | EPI_ISL_3900207 | 2021-09-02      |
| hCoV-19/Japan/PG-88486/2021 | EPI_ISL_3900208 | 2021-09-02      |
| hCoV-19/Japan/PG-88487/2021 | EPI_ISL_3900209 | 2021-09-02      |
| hCoV-19/Japan/PG-88488/2021 | EPI_ISL_3900210 | 2021-09-02      |
| hCoV-19/Japan/PG-88489/2021 | EPI_ISL_3900211 | 2021-09-02      |
| hCoV-19/Japan/PG-88490/2021 | EPI_ISL_3900212 | 2021-09-02      |
| hCoV-19/Japan/PG-88491/2021 | EPI_ISL_3900213 | 2021-09-02      |
| hCoV-19/Japan/PG-88492/2021 | EPI_ISL_3900214 | 2021-09-02      |
| hCoV-19/Japan/PG-88493/2021 | EPI_ISL_3900215 | 2021-09-02      |
| hCoV-19/Japan/PG-88494/2021 | EPI_ISL_3900216 | 2021-09-02      |
| hCoV-19/Japan/PG-88495/2021 | EPI_ISL_3900217 | 2021-09-02      |
| hCoV-19/Japan/PG-88496/2021 | EPI_ISL_3900218 | 2021-09-02      |
| hCoV-19/Japan/PG-88497/2021 | EPI_ISL_3900219 | 2021-09-02      |
| hCoV-19/Japan/PG-88498/2021 | EPI_ISL_3900220 | 2021-09-02      |
| hCoV-19/Japan/PG-88499/2021 | EPI_ISL_3900221 | 2021-09-02      |
| hCoV-19/Japan/PG-88500/2021 | EPI_ISL_3900222 | 2021-09-02      |
| hCoV-19/Japan/PG-88501/2021 | EPI_ISL_3900223 | 2021-09-02      |
| hCoV-19/Japan/PG-88502/2021 | EPI_ISL_3900224 | 2021-09-02      |
| hCoV-19/Japan/PG-88503/2021 | EPI_ISL_3900225 | 2021-09-02      |
| hCoV-19/Japan/PG-88504/2021 | EPI_ISL_3900226 | 2021-09-02      |
| hCoV-19/Japan/PG-88505/2021 | EPI_ISL_3900227 | 2021-09-02      |
| hCoV-19/Japan/PG-88506/2021 | EPI_ISL_3900228 | 2021-09-02      |
| hCoV-19/Japan/PG-88507/2021 | EPI_ISL_3900229 | 2021-09-02      |
| hCoV-19/Japan/PG-88508/2021 | EPI_ISL_3900230 | 2021-09-02      |
| hCoV-19/Japan/PG-88509/2021 | EPI_ISL_3900231 | 2021-09-02      |
| hCoV-19/Japan/PG-88510/2021 | EPI_ISL_3900232 | 2021-09-02      |
| hCoV-19/Japan/PG-88511/2021 | EPI_ISL_3900233 | 2021-09-02      |
| hCoV-19/Japan/PG-88512/2021 | EPI_ISL_3900234 | 2021-09-02      |
| hCoV-19/Japan/PG-88513/2021 | EPI_ISL_3900235 | 2021-09-02      |
| hCoV-19/Japan/PG-88514/2021 | EPI_ISL_3900236 | 2021-09-02      |
| hCoV-19/Japan/PG-88515/2021 | EPI_ISL_3900237 | 2021-09-02      |
| hCoV-19/Japan/PG-88516/2021 | EPI_ISL_3900238 | 2021-09-02      |
| hCoV-19/Japan/PG-88517/2021 | EPI_ISL_3900239 | 2021-09-02      |
| hCoV-19/Japan/PG-88518/2021 | EPI_ISL_3900240 | 2021-09-02      |
| hCoV-19/Japan/PG-88519/2021 | EPI_ISL_3900241 | 2021-09-02      |
| hCoV-19/Japan/PG-88520/2021 | EPI_ISL_3900242 | 2021-09-02      |
| hCoV-19/Japan/PG-88521/2021 | EPI_ISL_3900243 | 2021-09-02      |
| hCoV-19/Japan/PG-88522/2021 | EPI_ISL_3900244 | 2021-09-02      |
| hCoV-19/Japan/PG-88523/2021 | EPI_ISL_3900245 | 2021-09-02      |
| hCoV-19/Japan/PG-88524/2021 | EPI_ISL_3900246 | 2021-09-02      |
| hCoV-19/Japan/PG-88525/2021 | EPI_ISL_3900247 | 2021-09-02      |
| hCoV-19/Japan/PG-88526/2021 | EPI_ISL_3900248 | 2021-09-02      |
| hCoV-19/Japan/PG-88527/2021 | EPI_ISL_3900249 | 2021-09-02      |

| virus_name                  | epiID           | submission_date |
|-----------------------------|-----------------|-----------------|
| hCoV-19/Japan/PG-88528/2021 | EPI_ISL_3900250 | 2021-09-02      |
| hCoV-19/Japan/PG-88529/2021 | EPI_ISL_3900251 | 2021-09-02      |
| hCoV-19/Japan/PG-88530/2021 | EPI_ISL_3900252 | 2021-09-02      |
| hCoV-19/Japan/PG-88531/2021 | EPI_ISL_3900253 | 2021-09-02      |
| hCoV-19/Japan/PG-88532/2021 | EPI_ISL_3900254 | 2021-09-02      |
| hCoV-19/Japan/PG-88533/2021 | EPI_ISL_3900255 | 2021-09-02      |
| hCoV-19/Japan/PG-88534/2021 | EPI_ISL_3900256 | 2021-09-02      |
| hCoV-19/Japan/PG-88535/2021 | EPI_ISL_3900257 | 2021-09-02      |
| hCoV-19/Japan/PG-88536/2021 | EPI_ISL_3900258 | 2021-09-02      |
| hCoV-19/Japan/PG-88537/2021 | EPI_ISL_3900259 | 2021-09-02      |
| hCoV-19/Japan/PG-88538/2021 | EPI_ISL_3900260 | 2021-09-02      |
| hCoV-19/Japan/PG-88539/2021 | EPI_ISL_3900261 | 2021-09-02      |
| hCoV-19/Japan/PG-88540/2021 | EPI_ISL_3900262 | 2021-09-02      |
| hCoV-19/Japan/PG-88541/2021 | EPI_ISL_3900263 | 2021-09-02      |
| hCoV-19/Japan/PG-88542/2021 | EPI_ISL_3900264 | 2021-09-02      |
| hCoV-19/Japan/PG-88543/2021 | EPI_ISL_3900265 | 2021-09-02      |
| hCoV-19/Japan/PG-88544/2021 | EPI_ISL_3900266 | 2021-09-02      |
| hCoV-19/Japan/PG-88545/2021 | EPI_ISL_3900267 | 2021-09-02      |
| hCoV-19/Japan/PG-88546/2021 | EPI_ISL_3900268 | 2021-09-02      |
| hCoV-19/Japan/PG-88547/2021 | EPI_ISL_3900269 | 2021-09-02      |
| hCoV-19/Japan/PG-88548/2021 | EPI_ISL_3900270 | 2021-09-02      |
| hCoV-19/Japan/PG-88549/2021 | EPI_ISL_3900271 | 2021-09-02      |
| hCoV-19/Japan/PG-88550/2021 | EPI_ISL_3900272 | 2021-09-02      |
| hCoV-19/Japan/PG-88551/2021 | EPI_ISL_3900273 | 2021-09-02      |
| hCoV-19/Japan/PG-88552/2021 | EPI_ISL_3900274 | 2021-09-02      |
| hCoV-19/Japan/PG-88553/2021 | EPI_ISL_3900275 | 2021-09-02      |
| hCoV-19/Japan/PG-88554/2021 | EPI_ISL_3900276 | 2021-09-02      |
| hCoV-19/Japan/PG-88555/2021 | EPI_ISL_3900277 | 2021-09-02      |
| hCoV-19/Japan/PG-88556/2021 | EPI_ISL_3900278 | 2021-09-02      |
| hCoV-19/Japan/PG-88557/2021 | EPI_ISL_3900279 | 2021-09-02      |
| hCoV-19/Japan/PG-88558/2021 | EPI_ISL_3900280 | 2021-09-02      |
| hCoV-19/Japan/PG-88559/2021 | EPI_ISL_3900281 | 2021-09-02      |
| hCoV-19/Japan/PG-88560/2021 | EPI_ISL_3900282 | 2021-09-02      |
| hCoV-19/Japan/PG-88561/2021 | EPI_ISL_3900283 | 2021-09-02      |
| hCoV-19/Japan/PG-88562/2021 | EPI_ISL_3900284 | 2021-09-02      |
| hCoV-19/Japan/PG-88563/2021 | EPI_ISL_3900285 | 2021-09-02      |
| hCoV-19/Japan/PG-88564/2021 | EPI_ISL_3900286 | 2021-09-02      |
| hCoV-19/Japan/PG-88565/2021 | EPI_ISL_3900287 | 2021-09-02      |
| hCoV-19/Japan/PG-88566/2021 | EPI_ISL_3900288 | 2021-09-02      |
| hCoV-19/Japan/PG-88567/2021 | EPI_ISL_3900289 | 2021-09-02      |
| hCoV-19/Japan/PG-88568/2021 | EPI_ISL_3900290 | 2021-09-02      |
| hCoV-19/Japan/PG-88569/2021 | EPI_ISL_3900291 | 2021-09-02      |
| hCoV-19/Japan/PG-88570/2021 | EPI_ISL_3900292 | 2021-09-02      |
| hCoV-19/Japan/PG-88571/2021 | EPI_ISL_3900293 | 2021-09-02      |
| hCoV-19/Japan/PG-88572/2021 | EPI_ISL_3900294 | 2021-09-02      |
| hCoV-19/Japan/PG-88573/2021 | EPI_ISL_3900295 | 2021-09-02      |
| hCoV-19/Japan/PG-88574/2021 | EPI_ISL_3900296 | 2021-09-02      |
| hCoV-19/Japan/PG-88575/2021 | EPI_ISL_3900297 | 2021-09-02      |
| hCoV-19/Japan/PG-88576/2021 | EPI_ISL_3900298 | 2021-09-02      |
| hCoV-19/Japan/PG-88577/2021 | EPI_ISL_3900299 | 2021-09-02      |
| hCoV-19/Japan/PG-88578/2021 | EPI_ISL_3900300 | 2021-09-02      |
| hCoV-19/Japan/PG-88579/2021 | EPI_ISL_3900301 | 2021-09-02      |
| hCoV-19/Japan/PG-88580/2021 | EPI_ISL_3900302 | 2021-09-02      |
| hCoV-19/Japan/PG-88581/2021 | EPI_ISL_3900303 | 2021-09-02      |

| virus_name                  | epiID           | submission_date |
|-----------------------------|-----------------|-----------------|
| hCoV-19/Japan/PG-88582/2021 | EPI_ISL_3900304 | 2021-09-02      |
| hCoV-19/Japan/PG-88583/2021 | EPI_ISL_3900305 | 2021-09-02      |
| hCoV-19/Japan/PG-88584/2021 | EPI_ISL_3900306 | 2021-09-02      |
| hCoV-19/Japan/PG-88585/2021 | EPI_ISL_3900307 | 2021-09-02      |
| hCoV-19/Japan/PG-88586/2021 | EPI_ISL_3900308 | 2021-09-02      |
| hCoV-19/Japan/PG-88587/2021 | EPI_ISL_3900309 | 2021-09-02      |
| hCoV-19/Japan/PG-88588/2021 | EPI_ISL_3900310 | 2021-09-02      |
| hCoV-19/Japan/PG-88589/2021 | EPI_ISL_3900311 | 2021-09-02      |
| hCoV-19/Japan/PG-88590/2021 | EPI_ISL_3900312 | 2021-09-02      |
| hCoV-19/Japan/PG-88591/2021 | EPI_ISL_3900313 | 2021-09-02      |
| hCoV-19/Japan/PG-88592/2021 | EPI_ISL_3900314 | 2021-09-02      |
| hCoV-19/Japan/PG-88593/2021 | EPI_ISL_3900315 | 2021-09-02      |
| hCoV-19/Japan/PG-88594/2021 | EPI_ISL_3900316 | 2021-09-02      |
| hCoV-19/Japan/PG-88595/2021 | EPI_ISL_3900317 | 2021-09-02      |
| hCoV-19/Japan/PG-88596/2021 | EPI_ISL_3900318 | 2021-09-02      |
| hCoV-19/Japan/PG-88597/2021 | EPI_ISL_3900319 | 2021-09-02      |
| hCoV-19/Japan/PG-88598/2021 | EPI_ISL_3900320 | 2021-09-02      |
| hCoV-19/Japan/PG-88599/2021 | EPI_ISL_3900321 | 2021-09-02      |
| hCoV-19/Japan/PG-88600/2021 | EPI_ISL_3900322 | 2021-09-02      |
| hCoV-19/Japan/PG-88601/2021 | EPI_ISL_3900323 | 2021-09-02      |
| hCoV-19/Japan/PG-88602/2021 | EPI_ISL_3900324 | 2021-09-02      |
| hCoV-19/Japan/PG-88603/2021 | EPI_ISL_3900325 | 2021-09-02      |
| hCoV-19/Japan/PG-88604/2021 | EPI_ISL_3900326 | 2021-09-02      |
| hCoV-19/Japan/PG-88605/2021 | EPI_ISL_3900327 | 2021-09-02      |
| hCoV-19/Japan/PG-88606/2021 | EPI_ISL_3900328 | 2021-09-02      |
| hCoV-19/Japan/PG-88607/2021 | EPI_ISL_3900329 | 2021-09-02      |
| hCoV-19/Japan/PG-88608/2021 | EPI_ISL_3900330 | 2021-09-02      |
| hCoV-19/Japan/PG-88609/2021 | EPI_ISL_3900331 | 2021-09-02      |
| hCoV-19/Japan/PG-88610/2021 | EPI_ISL_3900332 | 2021-09-02      |
| hCoV-19/Japan/PG-88611/2021 | EPI_ISL_3900333 | 2021-09-02      |
| hCoV-19/Japan/PG-88612/2021 | EPI_ISL_3900334 | 2021-09-02      |
| hCoV-19/Japan/PG-88613/2021 | EPI_ISL_3900335 | 2021-09-02      |
| hCoV-19/Japan/PG-88614/2021 | EPI_ISL_3900336 | 2021-09-02      |
| hCoV-19/Japan/PG-88615/2021 | EPI_ISL_3900337 | 2021-09-02      |
| hCoV-19/Japan/PG-88616/2021 | EPI_ISL_3900338 | 2021-09-02      |
| hCoV-19/Japan/PG-88617/2021 | EPI_ISL_3900339 | 2021-09-02      |
| hCoV-19/Japan/PG-88618/2021 | EPI_ISL_3900340 | 2021-09-02      |
| hCoV-19/Japan/PG-88619/2021 | EPI_ISL_3900341 | 2021-09-02      |
| hCoV-19/Japan/PG-88620/2021 | EPI_ISL_3900342 | 2021-09-02      |
| hCoV-19/Japan/PG-88621/2021 | EPI_ISL_3900343 | 2021-09-02      |
| hCoV-19/Japan/PG-88622/2021 | EPI_ISL_3900344 | 2021-09-02      |
| hCoV-19/Japan/PG-88623/2021 | EPI_ISL_3900345 | 2021-09-02      |
| hCoV-19/Japan/PG-88624/2021 | EPI_ISL_3900346 | 2021-09-02      |
| hCoV-19/Japan/PG-88625/2021 | EPI_ISL_3900347 | 2021-09-02      |
| hCoV-19/Japan/PG-88626/2021 | EPI_ISL_3900348 | 2021-09-02      |
| hCoV-19/Japan/PG-88627/2021 | EPI_ISL_3900349 | 2021-09-02      |
| hCoV-19/Japan/PG-88628/2021 | EPI_ISL_3900350 | 2021-09-02      |
| hCoV-19/Japan/PG-88629/2021 | EPI_ISL_3900351 | 2021-09-02      |
| hCoV-19/Japan/PG-88630/2021 | EPI_ISL_3900352 | 2021-09-02      |
| hCoV-19/Japan/PG-88631/2021 | EPI_ISL_3900353 | 2021-09-02      |
| hCoV-19/Japan/PG-88632/2021 | EPI_ISL_3900354 | 2021-09-02      |
| hCoV-19/Japan/PG-88633/2021 | EPI_ISL_3900355 | 2021-09-02      |
| hCoV-19/Japan/PG-88634/2021 | EPI_ISL_3900356 | 2021-09-02      |
| hCoV-19/Japan/PG-88635/2021 | EPI_ISL_3900357 | 2021-09-02      |

| virus_name                  | epiID           | submission_date |
|-----------------------------|-----------------|-----------------|
| hCoV-19/Japan/PG-88636/2021 | EPI_ISL_3900358 | 2021-09-02      |
| hCoV-19/Japan/PG-88637/2021 | EPI_ISL_3900359 | 2021-09-02      |
| hCoV-19/Japan/PG-88638/2021 | EPI_ISL_3900360 | 2021-09-02      |
| hCoV-19/Japan/PG-88639/2021 | EPI_ISL_3900361 | 2021-09-02      |
| hCoV-19/Japan/PG-88640/2021 | EPI_ISL_3900362 | 2021-09-02      |
| hCoV-19/Japan/PG-88641/2021 | EPI_ISL_3900363 | 2021-09-02      |
| hCoV-19/Japan/PG-88642/2021 | EPI_ISL_3900364 | 2021-09-02      |
| hCoV-19/Japan/PG-88643/2021 | EPI_ISL_3900365 | 2021-09-02      |
| hCoV-19/Japan/PG-88644/2021 | EPI_ISL_3900366 | 2021-09-02      |
| hCoV-19/Japan/PG-88645/2021 | EPI_ISL_3900367 | 2021-09-02      |
| hCoV-19/Japan/PG-88646/2021 | EPI_ISL_3900368 | 2021-09-02      |
| hCoV-19/Japan/PG-88647/2021 | EPI_ISL_3900369 | 2021-09-02      |
| hCoV-19/Japan/PG-88648/2021 | EPI_ISL_3900370 | 2021-09-02      |
| hCoV-19/Japan/PG-88649/2021 | EPI_ISL_3900371 | 2021-09-02      |
| hCoV-19/Japan/PG-88650/2021 | EPI_ISL_3900372 | 2021-09-02      |
| hCoV-19/Japan/PG-88651/2021 | EPI_ISL_3900373 | 2021-09-02      |
| hCoV-19/Japan/PG-88652/2021 | EPI_ISL_3900374 | 2021-09-02      |
| hCoV-19/Japan/PG-88653/2021 | EPI_ISL_3900375 | 2021-09-02      |
| hCoV-19/Japan/PG-88654/2021 | EPI_ISL_3900376 | 2021-09-02      |
| hCoV-19/Japan/PG-88655/2021 | EPI_ISL_3900377 | 2021-09-02      |
| hCoV-19/Japan/PG-88656/2021 | EPI_ISL_3900378 | 2021-09-02      |
| hCoV-19/Japan/PG-88657/2021 | EPI_ISL_3900379 | 2021-09-02      |
| hCoV-19/Japan/PG-88658/2021 | EPI_ISL_3900380 | 2021-09-02      |
| hCoV-19/Japan/PG-88659/2021 | EPI_ISL_3900381 | 2021-09-02      |
| hCoV-19/Japan/PG-88660/2021 | EPI_ISL_3900382 | 2021-09-02      |
| hCoV-19/Japan/PG-88661/2021 | EPI_ISL_3900383 | 2021-09-02      |
| hCoV-19/Japan/PG-88662/2021 | EPI_ISL_3900384 | 2021-09-02      |
| hCoV-19/Japan/PG-88663/2021 | EPI_ISL_3900385 | 2021-09-02      |
| hCoV-19/Japan/PG-88664/2021 | EPI_ISL_3900386 | 2021-09-02      |
| hCoV-19/Japan/PG-88665/2021 | EPI_ISL_3900387 | 2021-09-02      |
| hCoV-19/Japan/PG-88666/2021 | EPI_ISL_3900388 | 2021-09-02      |
| hCoV-19/Japan/PG-88667/2021 | EPI_ISL_3900389 | 2021-09-02      |
| hCoV-19/Japan/PG-88668/2021 | EPI_ISL_3900390 | 2021-09-02      |
| hCoV-19/Japan/PG-88669/2021 | EPI_ISL_3900391 | 2021-09-02      |
| hCoV-19/Japan/PG-88670/2021 | EPI_ISL_3900392 | 2021-09-02      |
| hCoV-19/Japan/PG-88671/2021 | EPI_ISL_3900393 | 2021-09-02      |
| hCoV-19/Japan/PG-88672/2021 | EPI_ISL_3900394 | 2021-09-02      |
| hCoV-19/Japan/PG-88673/2021 | EPI_ISL_3900395 | 2021-09-02      |
| hCoV-19/Japan/PG-88674/2021 | EPI_ISL_3900396 | 2021-09-02      |
| hCoV-19/Japan/PG-88675/2021 | EPI_ISL_3900397 | 2021-09-02      |
| hCoV-19/Japan/PG-88676/2021 | EPI_ISL_3900398 | 2021-09-02      |
| hCoV-19/Japan/PG-88677/2021 | EPI_ISL_3900399 | 2021-09-02      |
| hCoV-19/Japan/PG-88678/2021 | EPI_ISL_3900400 | 2021-09-02      |
| hCoV-19/Japan/PG-88679/2021 | EPI_ISL_3900401 | 2021-09-02      |
| hCoV-19/Japan/PG-88680/2021 | EPI_ISL_3900402 | 2021-09-02      |
| hCoV-19/Japan/PG-88681/2021 | EPI_ISL_3900403 | 2021-09-02      |
| hCoV-19/Japan/PG-88682/2021 | EPI_ISL_3900404 | 2021-09-02      |
| hCoV-19/Japan/PG-88683/2021 | EPI_ISL_3900405 | 2021-09-02      |
| hCoV-19/Japan/PG-88684/2021 | EPI_ISL_3900406 | 2021-09-02      |
| hCoV-19/Japan/PG-88685/2021 | EPI_ISL_3900407 | 2021-09-02      |
| hCoV-19/Japan/PG-88686/2021 | EPI_ISL_3900408 | 2021-09-02      |
| hCoV-19/Japan/PG-88687/2021 | EPI_ISL_3900409 | 2021-09-02      |
| hCoV-19/Japan/PG-88688/2021 | EPI_ISL_3900410 | 2021-09-02      |
| hCoV-19/Japan/PG-88689/2021 | EPI_ISL_3900411 | 2021-09-02      |

| virus_name                  | epiID           | submission_date |
|-----------------------------|-----------------|-----------------|
| hCoV-19/Japan/PG-88690/2021 | EPI_ISL_3900412 | 2021-09-02      |
| hCoV-19/Japan/PG-88691/2021 | EPI_ISL_3900413 | 2021-09-02      |
| hCoV-19/Japan/PG-88692/2021 | EPI_ISL_3900414 | 2021-09-02      |
| hCoV-19/Japan/PG-88693/2021 | EPI_ISL_3900415 | 2021-09-02      |
| hCoV-19/Japan/PG-88694/2021 | EPI_ISL_3900416 | 2021-09-02      |
| hCoV-19/Japan/PG-88695/2021 | EPI_ISL_3900417 | 2021-09-02      |
| hCoV-19/Japan/PG-88696/2021 | EPI_ISL_3900418 | 2021-09-02      |
| hCoV-19/Japan/PG-88697/2021 | EPI_ISL_3900419 | 2021-09-02      |
| hCoV-19/Japan/PG-88698/2021 | EPI_ISL_3900420 | 2021-09-02      |
| hCoV-19/Japan/PG-88699/2021 | EPI_ISL_3900421 | 2021-09-02      |
| hCoV-19/Japan/PG-88700/2021 | EPI_ISL_3900422 | 2021-09-02      |
| hCoV-19/Japan/PG-88701/2021 | EPI_ISL_3900423 | 2021-09-02      |
| hCoV-19/Japan/PG-88702/2021 | EPI_ISL_3900424 | 2021-09-02      |
| hCoV-19/Japan/PG-88703/2021 | EPI_ISL_3900425 | 2021-09-02      |
| hCoV-19/Japan/PG-88704/2021 | EPI_ISL_3900426 | 2021-09-02      |
| hCoV-19/Japan/PG-88705/2021 | EPI_ISL_3900427 | 2021-09-02      |
| hCoV-19/Japan/PG-88706/2021 | EPI_ISL_3900428 | 2021-09-02      |
| hCoV-19/Japan/PG-88707/2021 | EPI_ISL_3900429 | 2021-09-02      |
| hCoV-19/Japan/PG-88708/2021 | EPI_ISL_3900430 | 2021-09-02      |
| hCoV-19/Japan/PG-88709/2021 | EPI_ISL_3900431 | 2021-09-02      |
| hCoV-19/Japan/PG-88710/2021 | EPI_ISL_3900432 | 2021-09-02      |
| hCoV-19/Japan/PG-88711/2021 | EPI_ISL_3900433 | 2021-09-02      |
| hCoV-19/Japan/PG-88712/2021 | EPI_ISL_3900434 | 2021-09-02      |
| hCoV-19/Japan/PG-88713/2021 | EPI_ISL_3900435 | 2021-09-02      |
| hCoV-19/Japan/PG-88714/2021 | EPI_ISL_3900436 | 2021-09-02      |
| hCoV-19/Japan/PG-88715/2021 | EPI_ISL_3900437 | 2021-09-02      |
| hCoV-19/Japan/PG-88716/2021 | EPI_ISL_3900438 | 2021-09-02      |
| hCoV-19/Japan/PG-88717/2021 | EPI_ISL_3900439 | 2021-09-02      |
| hCoV-19/Japan/PG-88718/2021 | EPI_ISL_3900440 | 2021-09-02      |
| hCoV-19/Japan/PG-88719/2021 | EPI_ISL_3900441 | 2021-09-02      |
| hCoV-19/Japan/PG-88720/2021 | EPI_ISL_3900442 | 2021-09-02      |
| hCoV-19/Japan/PG-88721/2021 | EPI_ISL_3900443 | 2021-09-02      |
| hCoV-19/Japan/PG-88722/2021 | EPI_ISL_3900444 | 2021-09-02      |
| hCoV-19/Japan/PG-88723/2021 | EPI_ISL_3900445 | 2021-09-02      |
| hCoV-19/Japan/PG-88724/2021 | EPI_ISL_3900446 | 2021-09-02      |
| hCoV-19/Japan/PG-88725/2021 | EPI_ISL_3900447 | 2021-09-02      |
| hCoV-19/Japan/PG-88726/2021 | EPI_ISL_3900448 | 2021-09-02      |
| hCoV-19/Japan/PG-88727/2021 | EPI_ISL_3900449 | 2021-09-02      |
| hCoV-19/Japan/PG-88728/2021 | EPI_ISL_3900450 | 2021-09-02      |
| hCoV-19/Japan/PG-88729/2021 | EPI_ISL_3900451 | 2021-09-02      |
| hCoV-19/Japan/PG-88730/2021 | EPI_ISL_3900452 | 2021-09-02      |
| hCoV-19/Japan/PG-88731/2021 | EPI_ISL_3900453 | 2021-09-02      |
| hCoV-19/Japan/PG-88732/2021 | EPI_ISL_3900454 | 2021-09-02      |
| hCoV-19/Japan/PG-88733/2021 | EPI_ISL_3900455 | 2021-09-02      |
| hCoV-19/Japan/PG-88734/2021 | EPI_ISL_3900456 | 2021-09-02      |
| hCoV-19/Japan/PG-88735/2021 | EPI_ISL_3900457 | 2021-09-02      |
| hCoV-19/Japan/PG-88736/2021 | EPI_ISL_3900458 | 2021-09-02      |
| hCoV-19/Japan/PG-88737/2021 | EPI_ISL_3900459 | 2021-09-02      |
| hCoV-19/Japan/PG-88738/2021 | EPI_ISL_3900460 | 2021-09-02      |
| hCoV-19/Japan/PG-88739/2021 | EPI_ISL_3900461 | 2021-09-02      |
| hCoV-19/Japan/PG-88740/2021 | EPI_ISL_3900462 | 2021-09-02      |
| hCoV-19/Japan/PG-88741/2021 | EPI_ISL_3900463 | 2021-09-02      |
| hCoV-19/Japan/PG-88742/2021 | EPI_ISL_3900464 | 2021-09-02      |
| hCoV-19/Japan/PG-88743/2021 | EPI_ISL_3900465 | 2021-09-02      |

| virus_name                  | epiID           | submission_date |
|-----------------------------|-----------------|-----------------|
| hCoV-19/Japan/PG-88744/2021 | EPI_ISL_3900466 | 2021-09-02      |
| hCoV-19/Japan/PG-88745/2021 | EPI_ISL_3900467 | 2021-09-02      |
| hCoV-19/Japan/PG-88746/2021 | EPI_ISL_3900468 | 2021-09-02      |
| hCoV-19/Japan/PG-88747/2021 | EPI_ISL_3900469 | 2021-09-02      |
| hCoV-19/Japan/PG-88748/2021 | EPI_ISL_3900470 | 2021-09-02      |
| hCoV-19/Japan/PG-88749/2021 | EPI_ISL_3900471 | 2021-09-02      |
| hCoV-19/Japan/PG-88750/2021 | EPI_ISL_3900472 | 2021-09-02      |
| hCoV-19/Japan/PG-88751/2021 | EPI_ISL_3900473 | 2021-09-02      |
| hCoV-19/Japan/PG-88752/2021 | EPI_ISL_3900474 | 2021-09-02      |
| hCoV-19/Japan/PG-88753/2021 | EPI_ISL_3900475 | 2021-09-02      |
| hCoV-19/Japan/PG-88754/2021 | EPI_ISL_3900476 | 2021-09-02      |
| hCoV-19/Japan/PG-88755/2021 | EPI_ISL_3900477 | 2021-09-02      |
| hCoV-19/Japan/PG-88756/2021 | EPI_ISL_3900478 | 2021-09-02      |
| hCoV-19/Japan/PG-88757/2021 | EPI_ISL_3900479 | 2021-09-02      |
| hCoV-19/Japan/PG-88758/2021 | EPI_ISL_3900480 | 2021-09-02      |
| hCoV-19/Japan/PG-88759/2021 | EPI_ISL_3900481 | 2021-09-02      |
| hCoV-19/Japan/PG-88760/2021 | EPI_ISL_3900482 | 2021-09-02      |
| hCoV-19/Japan/PG-88761/2021 | EPI_ISL_3900483 | 2021-09-02      |
| hCoV-19/Japan/PG-88762/2021 | EPI_ISL_3900484 | 2021-09-02      |
| hCoV-19/Japan/PG-88763/2021 | EPI_ISL_3900485 | 2021-09-02      |
| hCoV-19/Japan/PG-88764/2021 | EPI_ISL_3900486 | 2021-09-02      |
| hCoV-19/Japan/PG-88765/2021 | EPI_ISL_3900487 | 2021-09-02      |
| hCoV-19/Japan/PG-88766/2021 | EPI_ISL_3900488 | 2021-09-02      |
| hCoV-19/Japan/PG-88767/2021 | EPI_ISL_3900489 | 2021-09-02      |
| hCoV-19/Japan/PG-88768/2021 | EPI_ISL_3900490 | 2021-09-02      |
| hCoV-19/Japan/PG-88769/2021 | EPI_ISL_3900491 | 2021-09-02      |
| hCoV-19/Japan/PG-88770/2021 | EPI_ISL_3900492 | 2021-09-02      |
| hCoV-19/Japan/PG-88771/2021 | EPI_ISL_3900493 | 2021-09-02      |
| hCoV-19/Japan/PG-88772/2021 | EPI_ISL_3900494 | 2021-09-02      |
| hCoV-19/Japan/PG-88773/2021 | EPI_ISL_3900495 | 2021-09-02      |
| hCoV-19/Japan/PG-88774/2021 | EPI_ISL_3900496 | 2021-09-02      |
| hCoV-19/Japan/PG-88775/2021 | EPI_ISL_3900497 | 2021-09-02      |
| hCoV-19/Japan/PG-88776/2021 | EPI_ISL_3900498 | 2021-09-02      |
| hCoV-19/Japan/PG-88777/2021 | EPI_ISL_3900499 | 2021-09-02      |
| hCoV-19/Japan/PG-88778/2021 | EPI_ISL_3900500 | 2021-09-02      |
| hCoV-19/Japan/PG-88779/2021 | EPI_ISL_3900501 | 2021-09-02      |
| hCoV-19/Japan/PG-88780/2021 | EPI_ISL_3900502 | 2021-09-02      |
| hCoV-19/Japan/PG-88781/2021 | EPI_ISL_3900503 | 2021-09-02      |
| hCoV-19/Japan/PG-88782/2021 | EPI_ISL_3900504 | 2021-09-02      |
| hCoV-19/Japan/PG-88783/2021 | EPI_ISL_3900505 | 2021-09-02      |
| hCoV-19/Japan/PG-88784/2021 | EPI_ISL_3900506 | 2021-09-02      |
| hCoV-19/Japan/PG-88785/2021 | EPI_ISL_3900507 | 2021-09-02      |
| hCoV-19/Japan/PG-88786/2021 | EPI_ISL_3900508 | 2021-09-02      |
| hCoV-19/Japan/PG-88787/2021 | EPI_ISL_3900509 | 2021-09-02      |
| hCoV-19/Japan/PG-88788/2021 | EPI_ISL_3900510 | 2021-09-02      |
| hCoV-19/Japan/PG-88789/2021 | EPI_ISL_3900511 | 2021-09-02      |
| hCoV-19/Japan/PG-88790/2021 | EPI_ISL_3900512 | 2021-09-02      |
| hCoV-19/Japan/PG-88791/2021 | EPI_ISL_3900513 | 2021-09-02      |
| hCoV-19/Japan/PG-88792/2021 | EPI_ISL_3900514 | 2021-09-02      |
| hCoV-19/Japan/PG-88793/2021 | EPI_ISL_3900515 | 2021-09-02      |
| hCoV-19/Japan/PG-88794/2021 | EPI_ISL_3900516 | 2021-09-02      |
| hCoV-19/Japan/PG-88795/2021 | EPI_ISL_3900517 | 2021-09-02      |
| hCoV-19/Japan/PG-88796/2021 | EPI_ISL_3900518 | 2021-09-02      |
| hCoV-19/Japan/PG-88797/2021 | EPI_ISL_3900519 | 2021-09-02      |



| virus_name                  | epiID           | submission_date |
|-----------------------------|-----------------|-----------------|
| hCoV-19/Japan/PG-88798/2021 | EPI_ISL_3900520 | 2021-09-02      |
| hCoV-19/Japan/PG-88799/2021 | EPI_ISL_3900521 | 2021-09-02      |
| hCoV-19/Japan/PG-88800/2021 | EPI_ISL_3900522 | 2021-09-02      |
| hCoV-19/Japan/PG-88801/2021 | EPI_ISL_3900523 | 2021-09-02      |
| hCoV-19/Japan/PG-88802/2021 | EPI_ISL_3900524 | 2021-09-02      |
| hCoV-19/Japan/PG-88803/2021 | EPI_ISL_3900525 | 2021-09-02      |
| hCoV-19/Japan/PG-88804/2021 | EPI_ISL_3900526 | 2021-09-02      |
| hCoV-19/Japan/PG-88805/2021 | EPI_ISL_3900527 | 2021-09-02      |
| hCoV-19/Japan/PG-88806/2021 | EPI_ISL_3900528 | 2021-09-02      |
| hCoV-19/Japan/PG-88807/2021 | EPI_ISL_3900529 | 2021-09-02      |
| hCoV-19/Japan/PG-88808/2021 | EPI_ISL_3900530 | 2021-09-02      |
| hCoV-19/Japan/PG-88809/2021 | EPI_ISL_3900531 | 2021-09-02      |
| hCoV-19/Japan/PG-88810/2021 | EPI_ISL_3900532 | 2021-09-02      |
| hCoV-19/Japan/PG-88811/2021 | EPI_ISL_3900533 | 2021-09-02      |
| hCoV-19/Japan/PG-88812/2021 | EPI_ISL_3900534 | 2021-09-02      |
| hCoV-19/Japan/PG-88813/2021 | EPI_ISL_3900535 | 2021-09-02      |
| hCoV-19/Japan/PG-88814/2021 | EPI_ISL_3900536 | 2021-09-02      |
| hCoV-19/Japan/PG-88815/2021 | EPI_ISL_3900537 | 2021-09-02      |
| hCoV-19/Japan/PG-88816/2021 | EPI_ISL_3900538 | 2021-09-02      |
| hCoV-19/Japan/PG-88817/2021 | EPI_ISL_3900539 | 2021-09-02      |
| hCoV-19/Japan/PG-88818/2021 | EPI_ISL_3900540 | 2021-09-02      |
| hCoV-19/Japan/PG-88819/2021 | EPI_ISL_3900541 | 2021-09-02      |
| hCoV-19/Japan/PG-88820/2021 | EPI_ISL_3900542 | 2021-09-02      |
| hCoV-19/Japan/PG-88821/2021 | EPI_ISL_3900543 | 2021-09-02      |
| hCoV-19/Japan/PG-88822/2021 | EPI_ISL_3900544 | 2021-09-02      |
| hCoV-19/Japan/PG-88823/2021 | EPI_ISL_3900545 | 2021-09-02      |
| hCoV-19/Japan/PG-88824/2021 | EPI_ISL_3900546 | 2021-09-02      |
| hCoV-19/Japan/PG-88825/2021 | EPI_ISL_3900547 | 2021-09-02      |
| hCoV-19/Japan/PG-88826/2021 | EPI_ISL_3900548 | 2021-09-02      |
| hCoV-19/Japan/PG-88827/2021 | EPI_ISL_3900549 | 2021-09-02      |
| hCoV-19/Japan/PG-88828/2021 | EPI_ISL_3900550 | 2021-09-02      |
| hCoV-19/Japan/PG-88829/2021 | EPI_ISL_3900551 | 2021-09-02      |
| hCoV-19/Japan/PG-88830/2021 | EPI_ISL_3900552 | 2021-09-02      |
| hCoV-19/Japan/PG-88831/2021 | EPI_ISL_3900553 | 2021-09-02      |
| hCoV-19/Japan/PG-88832/2021 | EPI_ISL_3900554 | 2021-09-02      |
| hCoV-19/Japan/PG-88833/2021 | EPI_ISL_3900555 | 2021-09-02      |
| hCoV-19/Japan/PG-89248/2021 | EPI_ISL_3900556 | 2021-09-02      |
| hCoV-19/Japan/PG-89249/2021 | EPI_ISL_3900557 | 2021-09-02      |
| hCoV-19/Japan/PG-89250/2021 | EPI_ISL_3900558 | 2021-09-02      |
| hCoV-19/Japan/PG-89251/2021 | EPI_ISL_3900559 | 2021-09-02      |
| hCoV-19/Japan/PG-89252/2021 | EPI_ISL_3900560 | 2021-09-02      |
| hCoV-19/Japan/PG-89254/2021 | EPI_ISL_3900561 | 2021-09-02      |
| hCoV-19/Japan/PG-89255/2021 | EPI_ISL_3900562 | 2021-09-02      |
| hCoV-19/Japan/PG-89256/2021 | EPI_ISL_3900563 | 2021-09-02      |
| hCoV-19/Japan/PG-89257/2021 | EPI_ISL_3900564 | 2021-09-02      |
| hCoV-19/Japan/PG-89258/2021 | EPI_ISL_3900565 | 2021-09-02      |
| hCoV-19/Japan/PG-89259/2021 | EPI_ISL_3900566 | 2021-09-02      |
| hCoV-19/Japan/PG-89260/2021 | EPI_ISL_3900567 | 2021-09-02      |
| hCoV-19/Japan/PG-89261/2021 | EPI_ISL_3900568 | 2021-09-02      |
| hCoV-19/Japan/PG-89262/2021 | EPI_ISL_3900569 | 2021-09-02      |
| hCoV-19/Japan/PG-89263/2021 | EPI_ISL_3900570 | 2021-09-02      |
| hCoV-19/Japan/PG-89264/2021 | EPI_ISL_3900571 | 2021-09-02      |
| hCoV-19/Japan/PG-89265/2021 | EPI_ISL_3900572 | 2021-09-02      |
| hCoV-19/Japan/PG-89266/2021 | EPI_ISL_3900573 | 2021-09-02      |

| virus_name                  | epiID           | submission_date |
|-----------------------------|-----------------|-----------------|
| hCoV-19/Japan/PG-89267/2021 | EPI_ISL_3900574 | 2021-09-02      |
| hCoV-19/Japan/PG-89268/2021 | EPI_ISL_3900575 | 2021-09-02      |
| hCoV-19/Japan/PG-89269/2021 | EPI_ISL_3900576 | 2021-09-02      |
| hCoV-19/Japan/PG-89270/2021 | EPI_ISL_3900577 | 2021-09-02      |
| hCoV-19/Japan/PG-89271/2021 | EPI_ISL_3900578 | 2021-09-02      |
| hCoV-19/Japan/PG-89272/2021 | EPI_ISL_3900579 | 2021-09-02      |
| hCoV-19/Japan/PG-89273/2021 | EPI_ISL_3900580 | 2021-09-02      |
| hCoV-19/Japan/PG-89274/2021 | EPI_ISL_3900581 | 2021-09-02      |
| hCoV-19/Japan/PG-89275/2021 | EPI_ISL_3900582 | 2021-09-02      |
| hCoV-19/Japan/PG-89276/2021 | EPI_ISL_3900583 | 2021-09-02      |
| hCoV-19/Japan/PG-89277/2021 | EPI_ISL_3900584 | 2021-09-02      |
| hCoV-19/Japan/PG-89278/2021 | EPI_ISL_3900585 | 2021-09-02      |
| hCoV-19/Japan/PG-89279/2021 | EPI_ISL_3900586 | 2021-09-02      |
| hCoV-19/Japan/PG-89280/2021 | EPI_ISL_3900587 | 2021-09-02      |
| hCoV-19/Japan/PG-89281/2021 | EPI_ISL_3900588 | 2021-09-02      |
| hCoV-19/Japan/PG-89282/2021 | EPI_ISL_3900589 | 2021-09-02      |
| hCoV-19/Japan/PG-89283/2021 | EPI_ISL_3900590 | 2021-09-02      |
| hCoV-19/Japan/PG-89284/2021 | EPI_ISL_3900591 | 2021-09-02      |
| hCoV-19/Japan/PG-89285/2021 | EPI_ISL_3900592 | 2021-09-02      |
| hCoV-19/Japan/PG-89286/2021 | EPI_ISL_3900593 | 2021-09-02      |
| hCoV-19/Japan/PG-89287/2021 | EPI_ISL_3900594 | 2021-09-02      |
| hCoV-19/Japan/PG-89288/2021 | EPI_ISL_3900595 | 2021-09-02      |
| hCoV-19/Japan/PG-89290/2021 | EPI_ISL_3900596 | 2021-09-02      |
| hCoV-19/Japan/PG-89291/2021 | EPI_ISL_3900597 | 2021-09-02      |
| hCoV-19/Japan/PG-89292/2021 | EPI_ISL_3900598 | 2021-09-02      |
| hCoV-19/Japan/PG-89293/2021 | EPI_ISL_3900599 | 2021-09-02      |
| hCoV-19/Japan/PG-89294/2021 | EPI_ISL_3900600 | 2021-09-02      |
| hCoV-19/Japan/PG-89295/2021 | EPI_ISL_3900601 | 2021-09-02      |
| hCoV-19/Japan/PG-89296/2021 | EPI_ISL_3900602 | 2021-09-02      |
| hCoV-19/Japan/PG-89297/2021 | EPI_ISL_3900603 | 2021-09-02      |
| hCoV-19/Japan/PG-89298/2021 | EPI_ISL_3900604 | 2021-09-02      |
| hCoV-19/Japan/PG-89299/2021 | EPI_ISL_3900605 | 2021-09-02      |
| hCoV-19/Japan/PG-89300/2021 | EPI_ISL_3900606 | 2021-09-02      |
| hCoV-19/Japan/PG-89301/2021 | EPI_ISL_3900607 | 2021-09-02      |
| hCoV-19/Japan/PG-89302/2021 | EPI_ISL_3900608 | 2021-09-02      |
| hCoV-19/Japan/PG-89303/2021 | EPI_ISL_3873882 | 2021-09-02      |
| hCoV-19/Japan/PG-89304/2021 | EPI_ISL_3873883 | 2021-09-02      |
| hCoV-19/Japan/PG-89305/2021 | EPI_ISL_3873884 | 2021-09-02      |
| hCoV-19/Japan/PG-89306/2021 | EPI_ISL_3873885 | 2021-09-02      |
| hCoV-19/Japan/PG-89307/2021 | EPI_ISL_3873886 | 2021-09-02      |
| hCoV-19/Japan/PG-89308/2021 | EPI_ISL_3873887 | 2021-09-02      |
| hCoV-19/Japan/PG-89309/2021 | EPI_ISL_3873888 | 2021-09-02      |
| hCoV-19/Japan/PG-89310/2021 | EPI_ISL_3873889 | 2021-09-02      |
| hCoV-19/Japan/PG-89311/2021 | EPI_ISL_3873890 | 2021-09-02      |
| hCoV-19/Japan/PG-89312/2021 | EPI_ISL_3873891 | 2021-09-02      |
| hCoV-19/Japan/PG-89313/2021 | EPI_ISL_3873892 | 2021-09-02      |
| hCoV-19/Japan/PG-89314/2021 | EPI_ISL_3873893 | 2021-09-02      |
| hCoV-19/Japan/PG-89315/2021 | EPI_ISL_3873894 | 2021-09-02      |
| hCoV-19/Japan/PG-89316/2021 | EPI_ISL_3873895 | 2021-09-02      |
| hCoV-19/Japan/PG-89317/2021 | EPI_ISL_3873896 | 2021-09-02      |
| hCoV-19/Japan/PG-89318/2021 | EPI_ISL_3873897 | 2021-09-02      |
| hCoV-19/Japan/PG-89319/2021 | EPI_ISL_3873898 | 2021-09-02      |
| hCoV-19/Japan/PG-89320/2021 | EPI_ISL_3873899 | 2021-09-02      |
| hCoV-19/Japan/PG-89321/2021 | EPI_ISL_3873900 | 2021-09-02      |

| virus_name                  | epiID           | submission_date |
|-----------------------------|-----------------|-----------------|
| hCoV-19/Japan/PG-89322/2021 | EPI_ISL_3873901 | 2021-09-02      |
| hCoV-19/Japan/PG-89323/2021 | EPI_ISL_3873902 | 2021-09-02      |
| hCoV-19/Japan/PG-89324/2021 | EPI_ISL_3873903 | 2021-09-02      |
| hCoV-19/Japan/PG-89325/2021 | EPI_ISL_3873904 | 2021-09-02      |
| hCoV-19/Japan/PG-89326/2021 | EPI_ISL_3873905 | 2021-09-02      |
| hCoV-19/Japan/PG-89327/2021 | EPI_ISL_3873906 | 2021-09-02      |
| hCoV-19/Japan/PG-89328/2021 | EPI_ISL_3873907 | 2021-09-02      |
| hCoV-19/Japan/PG-89329/2021 | EPI_ISL_3873908 | 2021-09-02      |
| hCoV-19/Japan/PG-89330/2021 | EPI_ISL_3873909 | 2021-09-02      |
| hCoV-19/Japan/PG-89331/2021 | EPI_ISL_3873910 | 2021-09-02      |
| hCoV-19/Japan/PG-89332/2021 | EPI_ISL_3873911 | 2021-09-02      |
| hCoV-19/Japan/PG-89333/2021 | EPI_ISL_3873912 | 2021-09-02      |
| hCoV-19/Japan/PG-89334/2021 | EPI_ISL_3873913 | 2021-09-02      |
| hCoV-19/Japan/PG-89335/2021 | EPI_ISL_3873914 | 2021-09-02      |
| hCoV-19/Japan/PG-89336/2021 | EPI_ISL_3873915 | 2021-09-02      |
| hCoV-19/Japan/PG-89337/2021 | EPI_ISL_3873916 | 2021-09-02      |
| hCoV-19/Japan/PG-89338/2021 | EPI_ISL_3873917 | 2021-09-02      |
| hCoV-19/Japan/PG-89339/2021 | EPI_ISL_3873918 | 2021-09-02      |
| hCoV-19/Japan/PG-89340/2021 | EPI_ISL_3873919 | 2021-09-02      |
| hCoV-19/Japan/PG-89341/2021 | EPI_ISL_3873920 | 2021-09-02      |
| hCoV-19/Japan/PG-89342/2021 | EPI_ISL_3873921 | 2021-09-02      |
| hCoV-19/Japan/PG-89343/2021 | EPI_ISL_3873922 | 2021-09-02      |
| hCoV-19/Japan/PG-89344/2021 | EPI_ISL_3873923 | 2021-09-02      |
| hCoV-19/Japan/PG-89345/2021 | EPI_ISL_3873924 | 2021-09-02      |
| hCoV-19/Japan/PG-89346/2021 | EPI_ISL_3873925 | 2021-09-02      |
| hCoV-19/Japan/PG-89347/2021 | EPI_ISL_3873926 | 2021-09-02      |
| hCoV-19/Japan/PG-89348/2021 | EPI_ISL_3873927 | 2021-09-02      |
| hCoV-19/Japan/PG-89349/2021 | EPI_ISL_3873928 | 2021-09-02      |
| hCoV-19/Japan/PG-89350/2021 | EPI_ISL_3873929 | 2021-09-02      |
| hCoV-19/Japan/PG-89351/2021 | EPI_ISL_3873930 | 2021-09-02      |
| hCoV-19/Japan/PG-89352/2021 | EPI_ISL_3873931 | 2021-09-02      |
| hCoV-19/Japan/PG-89356/2021 | EPI_ISL_3873932 | 2021-09-02      |
| hCoV-19/Japan/PG-89357/2021 | EPI_ISL_3873933 | 2021-09-02      |
| hCoV-19/Japan/PG-89358/2021 | EPI_ISL_3873934 | 2021-09-02      |
| hCoV-19/Japan/PG-89359/2021 | EPI_ISL_3873935 | 2021-09-02      |
| hCoV-19/Japan/PG-89360/2021 | EPI_ISL_3873936 | 2021-09-02      |
| hCoV-19/Japan/PG-89361/2021 | EPI_ISL_3873937 | 2021-09-02      |
| hCoV-19/Japan/PG-89362/2021 | EPI_ISL_3873938 | 2021-09-02      |
| hCoV-19/Japan/PG-89363/2021 | EPI_ISL_3873939 | 2021-09-02      |
| hCoV-19/Japan/PG-89364/2021 | EPI_ISL_3873940 | 2021-09-02      |
| hCoV-19/Japan/PG-89365/2021 | EPI_ISL_3873941 | 2021-09-02      |
| hCoV-19/Japan/PG-89366/2021 | EPI_ISL_3873942 | 2021-09-02      |
| hCoV-19/Japan/PG-89367/2021 | EPI_ISL_3873943 | 2021-09-02      |
| hCoV-19/Japan/PG-89368/2021 | EPI_ISL_3873944 | 2021-09-02      |
| hCoV-19/Japan/PG-89369/2021 | EPI_ISL_3873945 | 2021-09-02      |
| hCoV-19/Japan/PG-89370/2021 | EPI_ISL_3873946 | 2021-09-02      |
| hCoV-19/Japan/PG-89371/2021 | EPI_ISL_3873947 | 2021-09-02      |
| hCoV-19/Japan/PG-89372/2021 | EPI_ISL_3873948 | 2021-09-02      |
| hCoV-19/Japan/PG-89373/2021 | EPI_ISL_3873949 | 2021-09-02      |
| hCoV-19/Japan/PG-89374/2021 | EPI_ISL_3873950 | 2021-09-02      |
| hCoV-19/Japan/PG-89375/2021 | EPI_ISL_3873951 | 2021-09-02      |
| hCoV-19/Japan/PG-89377/2021 | EPI_ISL_3875661 | 2021-09-02      |
| hCoV-19/Japan/PG-89378/2021 | EPI_ISL_3875665 | 2021-09-02      |
| hCoV-19/Japan/PG-89379/2021 | EPI_ISL_3875668 | 2021-09-02      |

| virus_name                  | epiID           | submission_date |
|-----------------------------|-----------------|-----------------|
| hCoV-19/Japan/PG-89390/2021 | EPI_ISL_3875671 | 2021-09-02      |
| hCoV-19/Japan/PG-89391/2021 | EPI_ISL_3875674 | 2021-09-02      |
| hCoV-19/Japan/PG-89392/2021 | EPI_ISL_3875676 | 2021-09-02      |
| hCoV-19/Japan/PG-89393/2021 | EPI_ISL_3875680 | 2021-09-02      |
| hCoV-19/Japan/PG-89394/2021 | EPI_ISL_3875683 | 2021-09-02      |
| hCoV-19/Japan/PG-89395/2021 | EPI_ISL_3875686 | 2021-09-02      |
| hCoV-19/Japan/PG-89396/2021 | EPI_ISL_3875688 | 2021-09-02      |
| hCoV-19/Japan/PG-89397/2021 | EPI_ISL_3875690 | 2021-09-02      |
| hCoV-19/Japan/PG-89398/2021 | EPI_ISL_3875691 | 2021-09-02      |
| hCoV-19/Japan/PG-89399/2021 | EPI_ISL_3875694 | 2021-09-02      |
| hCoV-19/Japan/PG-89400/2021 | EPI_ISL_3875697 | 2021-09-02      |
| hCoV-19/Japan/PG-89401/2021 | EPI_ISL_3875700 | 2021-09-02      |
| hCoV-19/Japan/PG-89402/2021 | EPI_ISL_3875703 | 2021-09-02      |
| hCoV-19/Japan/PG-89403/2021 | EPI_ISL_3875707 | 2021-09-02      |
| hCoV-19/Japan/PG-89404/2021 | EPI_ISL_3875710 | 2021-09-02      |
| hCoV-19/Japan/PG-89405/2021 | EPI_ISL_3871867 | 2021-09-02      |
| hCoV-19/Japan/PG-89417/2021 | EPI_ISL_3871868 | 2021-09-02      |
| hCoV-19/Japan/PG-89418/2021 | EPI_ISL_3871869 | 2021-09-02      |
| hCoV-19/Japan/PG-89419/2021 | EPI_ISL_3871870 | 2021-09-02      |
| hCoV-19/Japan/PG-89421/2021 | EPI_ISL_3871871 | 2021-09-02      |
| hCoV-19/Japan/PG-89422/2021 | EPI_ISL_3871872 | 2021-09-02      |
| hCoV-19/Japan/PG-89423/2021 | EPI_ISL_3871873 | 2021-09-02      |
| hCoV-19/Japan/PG-89427/2021 | EPI_ISL_3871874 | 2021-09-02      |
| hCoV-19/Japan/PG-89428/2021 | EPI_ISL_3871875 | 2021-09-02      |
| hCoV-19/Japan/PG-89429/2021 | EPI_ISL_3871380 | 2021-09-02      |
| hCoV-19/Japan/PG-89430/2021 | EPI_ISL_3871381 | 2021-09-02      |
| hCoV-19/Japan/PG-89431/2021 | EPI_ISL_3871382 | 2021-09-02      |
| hCoV-19/Japan/PG-89432/2021 | EPI_ISL_3871383 | 2021-09-02      |
| hCoV-19/Japan/PG-89433/2021 | EPI_ISL_3871384 | 2021-09-02      |
| hCoV-19/Japan/PG-89434/2021 | EPI_ISL_3871385 | 2021-09-02      |
| hCoV-19/Japan/PG-89435/2021 | EPI_ISL_3871386 | 2021-09-02      |
| hCoV-19/Japan/PG-89436/2021 | EPI_ISL_3871658 | 2021-09-02      |
| hCoV-19/Japan/PG-89437/2021 | EPI_ISL_3871659 | 2021-09-02      |
| hCoV-19/Japan/PG-89438/2021 | EPI_ISL_3871660 | 2021-09-02      |
| hCoV-19/Japan/PG-89439/2021 | EPI_ISL_3871661 | 2021-09-02      |
| hCoV-19/Japan/PG-89440/2021 | EPI_ISL_3871662 | 2021-09-02      |
| hCoV-19/Japan/PG-89441/2021 | EPI_ISL_3871663 | 2021-09-02      |
| hCoV-19/Japan/PG-89442/2021 | EPI_ISL_3871664 | 2021-09-02      |
| hCoV-19/Japan/PG-89443/2021 | EPI_ISL_3871665 | 2021-09-02      |
| hCoV-19/Japan/PG-89444/2021 | EPI_ISL_3871666 | 2021-09-02      |
| hCoV-19/Japan/PG-89445/2021 | EPI_ISL_3871667 | 2021-09-02      |
| hCoV-19/Japan/PG-89446/2021 | EPI_ISL_3871457 | 2021-09-02      |
| hCoV-19/Japan/PG-89447/2021 | EPI_ISL_3871458 | 2021-09-02      |
| hCoV-19/Japan/PG-89448/2021 | EPI_ISL_3871459 | 2021-09-02      |
| hCoV-19/Japan/PG-89449/2021 | EPI_ISL_3871460 | 2021-09-02      |
| hCoV-19/Japan/PG-89450/2021 | EPI_ISL_3871461 | 2021-09-02      |
| hCoV-19/Japan/PG-89451/2021 | EPI_ISL_3871462 | 2021-09-02      |
| hCoV-19/Japan/PG-89452/2021 | EPI_ISL_3871463 | 2021-09-02      |
| hCoV-19/Japan/PG-89453/2021 | EPI_ISL_3871336 | 2021-09-02      |
| hCoV-19/Japan/PG-89454/2021 | EPI_ISL_3871337 | 2021-09-02      |
| hCoV-19/Japan/PG-89455/2021 | EPI_ISL_3871338 | 2021-09-02      |
| hCoV-19/Japan/PG-89456/2021 | EPI_ISL_3871339 | 2021-09-02      |
| hCoV-19/Japan/PG-89457/2021 | EPI_ISL_3871340 | 2021-09-02      |
| hCoV-19/Japan/PG-89458/2021 | EPI_ISL_3871341 | 2021-09-02      |

| virus_name                  | epiID           | submission_date |
|-----------------------------|-----------------|-----------------|
| hCoV-19/Japan/PG-89459/2021 | EPI_ISL_3871342 | 2021-09-02      |
| hCoV-19/Japan/PG-89460/2021 | EPI_ISL_3871343 | 2021-09-02      |
| hCoV-19/Japan/PG-89461/2021 | EPI_ISL_3871344 | 2021-09-02      |
| hCoV-19/Japan/PG-89462/2021 | EPI_ISL_3871345 | 2021-09-02      |
| hCoV-19/Japan/PG-89463/2021 | EPI_ISL_3871346 | 2021-09-02      |
| hCoV-19/Japan/PG-89464/2021 | EPI_ISL_3871347 | 2021-09-02      |
| hCoV-19/Japan/PG-89465/2021 | EPI_ISL_3871348 | 2021-09-02      |
| hCoV-19/Japan/PG-89466/2021 | EPI_ISL_3871349 | 2021-09-02      |
| hCoV-19/Japan/PG-89467/2021 | EPI_ISL_3871350 | 2021-09-02      |
| hCoV-19/Japan/PG-89468/2021 | EPI_ISL_3871351 | 2021-09-02      |
| hCoV-19/Japan/PG-89469/2021 | EPI_ISL_3871352 | 2021-09-02      |
| hCoV-19/Japan/PG-89470/2021 | EPI_ISL_3871353 | 2021-09-02      |
| hCoV-19/Japan/PG-89471/2021 | EPI_ISL_3871354 | 2021-09-02      |
| hCoV-19/Japan/PG-89472/2021 | EPI_ISL_3871355 | 2021-09-02      |
| hCoV-19/Japan/PG-89473/2021 | EPI_ISL_3871356 | 2021-09-02      |
| hCoV-19/Japan/PG-89474/2021 | EPI_ISL_3871357 | 2021-09-02      |
| hCoV-19/Japan/PG-89475/2021 | EPI_ISL_3871358 | 2021-09-02      |
| hCoV-19/Japan/PG-89493/2021 | EPI_ISL_3873502 | 2021-09-02      |
| hCoV-19/Japan/PG-89494/2021 | EPI_ISL_3873503 | 2021-09-02      |
| hCoV-19/Japan/PG-89495/2021 | EPI_ISL_3873504 | 2021-09-02      |
| hCoV-19/Japan/PG-89496/2021 | EPI_ISL_3873505 | 2021-09-02      |
| hCoV-19/Japan/PG-89497/2021 | EPI_ISL_3873506 | 2021-09-02      |
| hCoV-19/Japan/PG-89498/2021 | EPI_ISL_3873507 | 2021-09-02      |
| hCoV-19/Japan/PG-89499/2021 | EPI_ISL_3873508 | 2021-09-02      |
| hCoV-19/Japan/PG-89500/2021 | EPI_ISL_3873509 | 2021-09-02      |
| hCoV-19/Japan/PG-89501/2021 | EPI_ISL_3873510 | 2021-09-02      |
| hCoV-19/Japan/PG-89502/2021 | EPI_ISL_3873511 | 2021-09-02      |
| hCoV-19/Japan/PG-89503/2021 | EPI_ISL_3873512 | 2021-09-02      |
| hCoV-19/Japan/PG-89504/2021 | EPI_ISL_3873513 | 2021-09-02      |
| hCoV-19/Japan/PG-89505/2021 | EPI_ISL_3873514 | 2021-09-02      |
| hCoV-19/Japan/PG-89506/2021 | EPI_ISL_3873515 | 2021-09-02      |
| hCoV-19/Japan/PG-89507/2021 | EPI_ISL_3873516 | 2021-09-02      |
| hCoV-19/Japan/PG-89508/2021 | EPI_ISL_3873517 | 2021-09-02      |
| hCoV-19/Japan/PG-89509/2021 | EPI_ISL_3873518 | 2021-09-02      |
| hCoV-19/Japan/PG-89510/2021 | EPI_ISL_3873519 | 2021-09-02      |
| hCoV-19/Japan/PG-89511/2021 | EPI_ISL_3873520 | 2021-09-02      |
| hCoV-19/Japan/PG-89512/2021 | EPI_ISL_3873521 | 2021-09-02      |
| hCoV-19/Japan/PG-89513/2021 | EPI_ISL_3873522 | 2021-09-02      |
| hCoV-19/Japan/PG-89514/2021 | EPI_ISL_3873523 | 2021-09-02      |
| hCoV-19/Japan/PG-89515/2021 | EPI_ISL_3873524 | 2021-09-02      |
| hCoV-19/Japan/PG-89516/2021 | EPI_ISL_3874570 | 2021-09-02      |
| hCoV-19/Japan/PG-89517/2021 | EPI_ISL_3874571 | 2021-09-02      |
| hCoV-19/Japan/PG-89518/2021 | EPI_ISL_3874574 | 2021-09-02      |
| hCoV-19/Japan/PG-89519/2021 | EPI_ISL_3874577 | 2021-09-02      |
| hCoV-19/Japan/PG-89520/2021 | EPI_ISL_3874579 | 2021-09-02      |
| hCoV-19/Japan/PG-89521/2021 | EPI_ISL_3874582 | 2021-09-02      |
| hCoV-19/Japan/PG-89522/2021 | EPI_ISL_3874585 | 2021-09-02      |
| hCoV-19/Japan/PG-89523/2021 | EPI_ISL_3874587 | 2021-09-02      |
| hCoV-19/Japan/PG-89524/2021 | EPI_ISL_3874589 | 2021-09-02      |
| hCoV-19/Japan/PG-89525/2021 | EPI_ISL_3874592 | 2021-09-02      |
| hCoV-19/Japan/PG-89526/2021 | EPI_ISL_3874594 | 2021-09-02      |
| hCoV-19/Japan/PG-89527/2021 | EPI_ISL_3874597 | 2021-09-02      |
| hCoV-19/Japan/PG-89528/2021 | EPI_ISL_3874599 | 2021-09-02      |
| hCoV-19/Japan/PG-89529/2021 | EPI_ISL_3874601 | 2021-09-02      |

| virus_name                  | epiID           | submission_date |
|-----------------------------|-----------------|-----------------|
| hCoV-19/Japan/PG-89530/2021 | EPI_ISL_3874603 | 2021-09-02      |
| hCoV-19/Japan/PG-89531/2021 | EPI_ISL_3874606 | 2021-09-02      |
| hCoV-19/Japan/PG-89532/2021 | EPI_ISL_3874609 | 2021-09-02      |
| hCoV-19/Japan/PG-89533/2021 | EPI_ISL_3874611 | 2021-09-02      |
| hCoV-19/Japan/PG-89534/2021 | EPI_ISL_3874614 | 2021-09-02      |
| hCoV-19/Japan/PG-89535/2021 | EPI_ISL_3874615 | 2021-09-02      |
| hCoV-19/Japan/PG-89536/2021 | EPI_ISL_3874617 | 2021-09-02      |
| hCoV-19/Japan/PG-89537/2021 | EPI_ISL_3874619 | 2021-09-02      |
| hCoV-19/Japan/PG-89538/2021 | EPI_ISL_3874622 | 2021-09-02      |
| hCoV-19/Japan/PG-89539/2021 | EPI_ISL_3874624 | 2021-09-02      |
| hCoV-19/Japan/PG-89540/2021 | EPI_ISL_3872334 | 2021-09-02      |
| hCoV-19/Japan/PG-89541/2021 | EPI_ISL_3872335 | 2021-09-02      |
| hCoV-19/Japan/PG-89542/2021 | EPI_ISL_3872336 | 2021-09-02      |
| hCoV-19/Japan/PG-89543/2021 | EPI_ISL_3872337 | 2021-09-02      |
| hCoV-19/Japan/PG-89544/2021 | EPI_ISL_3872338 | 2021-09-02      |
| hCoV-19/Japan/PG-89545/2021 | EPI_ISL_3872339 | 2021-09-02      |
| hCoV-19/Japan/PG-89546/2021 | EPI_ISL_3872340 | 2021-09-02      |
| hCoV-19/Japan/PG-89547/2021 | EPI_ISL_3872341 | 2021-09-02      |
| hCoV-19/Japan/PG-89548/2021 | EPI_ISL_3872342 | 2021-09-02      |
| hCoV-19/Japan/PG-89549/2021 | EPI_ISL_3872343 | 2021-09-02      |
| hCoV-19/Japan/PG-89550/2021 | EPI_ISL_3872344 | 2021-09-02      |
| hCoV-19/Japan/PG-89551/2021 | EPI_ISL_3872345 | 2021-09-02      |
| hCoV-19/Japan/PG-89552/2021 | EPI_ISL_3872346 | 2021-09-02      |
| hCoV-19/Japan/PG-89553/2021 | EPI_ISL_3900609 | 2021-09-02      |
| hCoV-19/Japan/PG-89554/2021 | EPI_ISL_3900610 | 2021-09-02      |
| hCoV-19/Japan/PG-89555/2021 | EPI_ISL_3900611 | 2021-09-02      |
| hCoV-19/Japan/PG-89556/2021 | EPI_ISL_3900612 | 2021-09-02      |
| hCoV-19/Japan/PG-89557/2021 | EPI_ISL_3900613 | 2021-09-02      |
| hCoV-19/Japan/PG-89558/2021 | EPI_ISL_3900614 | 2021-09-02      |
| hCoV-19/Japan/PG-89559/2021 | EPI_ISL_3900615 | 2021-09-02      |
| hCoV-19/Japan/PG-89560/2021 | EPI_ISL_3900616 | 2021-09-02      |
| hCoV-19/Japan/PG-89561/2021 | EPI_ISL_3900617 | 2021-09-02      |
| hCoV-19/Japan/PG-89562/2021 | EPI_ISL_3900618 | 2021-09-02      |
| hCoV-19/Japan/PG-89563/2021 | EPI_ISL_3900619 | 2021-09-02      |
| hCoV-19/Japan/PG-89564/2021 | EPI_ISL_3900620 | 2021-09-02      |
| hCoV-19/Japan/PG-89565/2021 | EPI_ISL_3900621 | 2021-09-02      |
| hCoV-19/Japan/PG-89566/2021 | EPI_ISL_3900622 | 2021-09-02      |
| hCoV-19/Japan/PG-89567/2021 | EPI_ISL_3900623 | 2021-09-02      |
| hCoV-19/Japan/PG-89568/2021 | EPI_ISL_3900624 | 2021-09-02      |
| hCoV-19/Japan/PG-89569/2021 | EPI_ISL_3900625 | 2021-09-02      |
| hCoV-19/Japan/PG-89570/2021 | EPI_ISL_3900626 | 2021-09-02      |
| hCoV-19/Japan/PG-89571/2021 | EPI_ISL_3900627 | 2021-09-02      |
| hCoV-19/Japan/PG-89572/2021 | EPI_ISL_3900628 | 2021-09-02      |
| hCoV-19/Japan/PG-89573/2021 | EPI_ISL_3900629 | 2021-09-02      |
| hCoV-19/Japan/PG-89574/2021 | EPI_ISL_3900630 | 2021-09-02      |
| hCoV-19/Japan/PG-89575/2021 | EPI_ISL_3900631 | 2021-09-02      |
| hCoV-19/Japan/PG-89576/2021 | EPI_ISL_3900632 | 2021-09-02      |
| hCoV-19/Japan/PG-89577/2021 | EPI_ISL_3900633 | 2021-09-02      |
| hCoV-19/Japan/PG-89578/2021 | EPI_ISL_3900634 | 2021-09-02      |
| hCoV-19/Japan/PG-89579/2021 | EPI_ISL_3900635 | 2021-09-02      |
| hCoV-19/Japan/PG-89580/2021 | EPI_ISL_3900636 | 2021-09-02      |
| hCoV-19/Japan/PG-89581/2021 | EPI_ISL_3900637 | 2021-09-02      |
| hCoV-19/Japan/PG-89582/2021 | EPI_ISL_3900638 | 2021-09-02      |
| hCoV-19/Japan/PG-89583/2021 | EPI_ISL_3900639 | 2021-09-02      |

| virus_name                  | epiID           | submission_date |
|-----------------------------|-----------------|-----------------|
| hCoV-19/Japan/PG-89584/2021 | EPI_ISL_3900640 | 2021-09-02      |
| hCoV-19/Japan/PG-89585/2021 | EPI_ISL_3900641 | 2021-09-02      |
| hCoV-19/Japan/PG-89586/2021 | EPI_ISL_3900642 | 2021-09-02      |
| hCoV-19/Japan/PG-89587/2021 | EPI_ISL_3900643 | 2021-09-02      |
| hCoV-19/Japan/PG-89588/2021 | EPI_ISL_3900644 | 2021-09-02      |
| hCoV-19/Japan/PG-89589/2021 | EPI_ISL_3900645 | 2021-09-02      |
| hCoV-19/Japan/PG-89590/2021 | EPI_ISL_3900646 | 2021-09-02      |
| hCoV-19/Japan/PG-89591/2021 | EPI_ISL_3900647 | 2021-09-02      |
| hCoV-19/Japan/PG-89592/2021 | EPI_ISL_3900648 | 2021-09-02      |
| hCoV-19/Japan/PG-89593/2021 | EPI_ISL_3900649 | 2021-09-02      |
| hCoV-19/Japan/PG-89594/2021 | EPI_ISL_3900650 | 2021-09-02      |
| hCoV-19/Japan/PG-89595/2021 | EPI_ISL_3900651 | 2021-09-02      |
| hCoV-19/Japan/PG-89596/2021 | EPI_ISL_3900652 | 2021-09-02      |
| hCoV-19/Japan/PG-89597/2021 | EPI_ISL_3900653 | 2021-09-02      |
| hCoV-19/Japan/PG-89598/2021 | EPI_ISL_3900654 | 2021-09-02      |
| hCoV-19/Japan/PG-89599/2021 | EPI_ISL_3900655 | 2021-09-02      |
| hCoV-19/Japan/PG-89600/2021 | EPI_ISL_3900656 | 2021-09-02      |
| hCoV-19/Japan/PG-89601/2021 | EPI_ISL_3900657 | 2021-09-02      |
| hCoV-19/Japan/PG-89602/2021 | EPI_ISL_3900658 | 2021-09-02      |
| hCoV-19/Japan/PG-89603/2021 | EPI_ISL_3900659 | 2021-09-02      |
| hCoV-19/Japan/PG-89604/2021 | EPI_ISL_3900661 | 2021-09-02      |
| hCoV-19/Japan/PG-89605/2021 | EPI_ISL_3900663 | 2021-09-02      |
| hCoV-19/Japan/PG-89606/2021 | EPI_ISL_3900666 | 2021-09-02      |
| hCoV-19/Japan/PG-89607/2021 | EPI_ISL_3900669 | 2021-09-02      |
| hCoV-19/Japan/PG-89608/2021 | EPI_ISL_3900673 | 2021-09-02      |
| hCoV-19/Japan/PG-89609/2021 | EPI_ISL_3900676 | 2021-09-02      |
| hCoV-19/Japan/PG-89610/2021 | EPI_ISL_3900679 | 2021-09-02      |
| hCoV-19/Japan/PG-89611/2021 | EPI_ISL_3900683 | 2021-09-02      |
| hCoV-19/Japan/PG-89612/2021 | EPI_ISL_3900686 | 2021-09-02      |
| hCoV-19/Japan/PG-89613/2021 | EPI_ISL_3900689 | 2021-09-02      |
| hCoV-19/Japan/PG-89614/2021 | EPI_ISL_3900692 | 2021-09-02      |
| hCoV-19/Japan/PG-89615/2021 | EPI_ISL_3900695 | 2021-09-02      |
| hCoV-19/Japan/PG-89616/2021 | EPI_ISL_3900699 | 2021-09-02      |
| hCoV-19/Japan/PG-89617/2021 | EPI_ISL_3900702 | 2021-09-02      |
| hCoV-19/Japan/PG-89618/2021 | EPI_ISL_3900705 | 2021-09-02      |
| hCoV-19/Japan/PG-89619/2021 | EPI_ISL_3900708 | 2021-09-02      |
| hCoV-19/Japan/PG-89620/2021 | EPI_ISL_3900711 | 2021-09-02      |
| hCoV-19/Japan/PG-89621/2021 | EPI_ISL_3900714 | 2021-09-02      |
| hCoV-19/Japan/PG-89622/2021 | EPI_ISL_3900717 | 2021-09-02      |
| hCoV-19/Japan/PG-89623/2021 | EPI_ISL_3900720 | 2021-09-02      |
| hCoV-19/Japan/PG-89624/2021 | EPI_ISL_3900723 | 2021-09-02      |
| hCoV-19/Japan/PG-89625/2021 | EPI_ISL_3900726 | 2021-09-02      |
| hCoV-19/Japan/PG-89626/2021 | EPI_ISL_3900729 | 2021-09-02      |
| hCoV-19/Japan/PG-89627/2021 | EPI_ISL_3900732 | 2021-09-02      |
| hCoV-19/Japan/PG-89628/2021 | EPI_ISL_3900734 | 2021-09-02      |
| hCoV-19/Japan/PG-89629/2021 | EPI_ISL_3900736 | 2021-09-02      |
| hCoV-19/Japan/PG-89630/2021 | EPI_ISL_3900739 | 2021-09-02      |
| hCoV-19/Japan/PG-89631/2021 | EPI_ISL_3900742 | 2021-09-02      |
| hCoV-19/Japan/PG-89632/2021 | EPI_ISL_3900744 | 2021-09-02      |
| hCoV-19/Japan/PG-89633/2021 | EPI_ISL_3900745 | 2021-09-02      |
| hCoV-19/Japan/PG-89634/2021 | EPI_ISL_3900746 | 2021-09-02      |
| hCoV-19/Japan/PG-89635/2021 | EPI_ISL_3900747 | 2021-09-02      |
| hCoV-19/Japan/PG-89636/2021 | EPI_ISL_3900748 | 2021-09-02      |
| hCoV-19/Japan/PG-89637/2021 | EPI_ISL_3900749 | 2021-09-02      |

| virus_name                  | epiID           | submission_date |
|-----------------------------|-----------------|-----------------|
| hCoV-19/Japan/PG-89638/2021 | EPI_ISL_3900750 | 2021-09-02      |
| hCoV-19/Japan/PG-89639/2021 | EPI_ISL_3900751 | 2021-09-02      |
| hCoV-19/Japan/PG-89640/2021 | EPI_ISL_3900752 | 2021-09-02      |
| hCoV-19/Japan/PG-89641/2021 | EPI_ISL_3900753 | 2021-09-02      |
| hCoV-19/Japan/PG-89642/2021 | EPI_ISL_3900754 | 2021-09-02      |
| hCoV-19/Japan/PG-89643/2021 | EPI_ISL_3900755 | 2021-09-02      |
| hCoV-19/Japan/PG-89644/2021 | EPI_ISL_3900756 | 2021-09-02      |
| hCoV-19/Japan/PG-89645/2021 | EPI_ISL_3900757 | 2021-09-02      |
| hCoV-19/Japan/PG-89646/2021 | EPI_ISL_3900758 | 2021-09-02      |
| hCoV-19/Japan/PG-89647/2021 | EPI_ISL_3900759 | 2021-09-02      |
| hCoV-19/Japan/PG-89648/2021 | EPI_ISL_3900760 | 2021-09-02      |
| hCoV-19/Japan/PG-89649/2021 | EPI_ISL_3900761 | 2021-09-02      |
| hCoV-19/Japan/PG-89650/2021 | EPI_ISL_3900762 | 2021-09-02      |
| hCoV-19/Japan/PG-89651/2021 | EPI_ISL_3900763 | 2021-09-02      |
| hCoV-19/Japan/PG-89652/2021 | EPI_ISL_3900764 | 2021-09-02      |
| hCoV-19/Japan/PG-89653/2021 | EPI_ISL_3900765 | 2021-09-02      |
| hCoV-19/Japan/PG-89654/2021 | EPI_ISL_3900766 | 2021-09-02      |
| hCoV-19/Japan/PG-89655/2021 | EPI_ISL_3900767 | 2021-09-02      |
| hCoV-19/Japan/PG-89656/2021 | EPI_ISL_3900768 | 2021-09-02      |
| hCoV-19/Japan/PG-89657/2021 | EPI_ISL_3900769 | 2021-09-02      |
| hCoV-19/Japan/PG-89658/2021 | EPI_ISL_3900770 | 2021-09-02      |
| hCoV-19/Japan/PG-89659/2021 | EPI_ISL_3900771 | 2021-09-02      |
| hCoV-19/Japan/PG-89660/2021 | EPI_ISL_3900772 | 2021-09-02      |
| hCoV-19/Japan/PG-89661/2021 | EPI_ISL_3900773 | 2021-09-02      |
| hCoV-19/Japan/PG-89662/2021 | EPI_ISL_3900774 | 2021-09-02      |
| hCoV-19/Japan/PG-89663/2021 | EPI_ISL_3900775 | 2021-09-02      |
| hCoV-19/Japan/PG-89664/2021 | EPI_ISL_3900776 | 2021-09-02      |
| hCoV-19/Japan/PG-89665/2021 | EPI_ISL_3900777 | 2021-09-02      |
| hCoV-19/Japan/PG-89666/2021 | EPI_ISL_3900778 | 2021-09-02      |
| hCoV-19/Japan/PG-89667/2021 | EPI_ISL_3900779 | 2021-09-02      |
| hCoV-19/Japan/PG-89668/2021 | EPI_ISL_3900780 | 2021-09-02      |
| hCoV-19/Japan/PG-89669/2021 | EPI_ISL_3900781 | 2021-09-02      |
| hCoV-19/Japan/PG-89670/2021 | EPI_ISL_3900782 | 2021-09-02      |
| hCoV-19/Japan/PG-89671/2021 | EPI_ISL_3900783 | 2021-09-02      |
| hCoV-19/Japan/PG-89672/2021 | EPI_ISL_3900784 | 2021-09-02      |
| hCoV-19/Japan/PG-89673/2021 | EPI_ISL_3900785 | 2021-09-02      |
| hCoV-19/Japan/PG-89674/2021 | EPI_ISL_3900786 | 2021-09-02      |
| hCoV-19/Japan/PG-89675/2021 | EPI_ISL_3900787 | 2021-09-02      |
| hCoV-19/Japan/PG-89676/2021 | EPI_ISL_3900788 | 2021-09-02      |
| hCoV-19/Japan/PG-89677/2021 | EPI_ISL_3900789 | 2021-09-02      |
| hCoV-19/Japan/PG-89678/2021 | EPI_ISL_3900790 | 2021-09-02      |
| hCoV-19/Japan/PG-89679/2021 | EPI_ISL_3900791 | 2021-09-02      |
| hCoV-19/Japan/PG-89680/2021 | EPI_ISL_3900792 | 2021-09-02      |
| hCoV-19/Japan/PG-89681/2021 | EPI_ISL_3900793 | 2021-09-02      |
| hCoV-19/Japan/PG-89682/2021 | EPI_ISL_3900794 | 2021-09-02      |
| hCoV-19/Japan/PG-89683/2021 | EPI_ISL_3900795 | 2021-09-02      |
| hCoV-19/Japan/PG-89684/2021 | EPI_ISL_3900796 | 2021-09-02      |
| hCoV-19/Japan/PG-89685/2021 | EPI_ISL_3900797 | 2021-09-02      |
| hCoV-19/Japan/PG-89686/2021 | EPI_ISL_3900798 | 2021-09-02      |
| hCoV-19/Japan/PG-89687/2021 | EPI_ISL_3900799 | 2021-09-02      |
| hCoV-19/Japan/PG-89688/2021 | EPI_ISL_3900800 | 2021-09-02      |
| hCoV-19/Japan/PG-89689/2021 | EPI_ISL_3900801 | 2021-09-02      |
| hCoV-19/Japan/PG-89690/2021 | EPI_ISL_3900802 | 2021-09-02      |
| hCoV-19/Japan/PG-89691/2021 | EPI_ISL_3900803 | 2021-09-02      |



| virus_name                  | epiID           | submission_date |
|-----------------------------|-----------------|-----------------|
| hCoV-19/Japan/PG-89692/2021 | EPI_ISL_3900804 | 2021-09-02      |
| hCoV-19/Japan/PG-89693/2021 | EPI_ISL_3900805 | 2021-09-02      |
| hCoV-19/Japan/PG-89694/2021 | EPI_ISL_3900806 | 2021-09-02      |
| hCoV-19/Japan/PG-89695/2021 | EPI_ISL_3900807 | 2021-09-02      |
| hCoV-19/Japan/PG-89696/2021 | EPI_ISL_3900808 | 2021-09-02      |
| hCoV-19/Japan/PG-89697/2021 | EPI_ISL_3900809 | 2021-09-02      |
| hCoV-19/Japan/PG-89698/2021 | EPI_ISL_3900810 | 2021-09-02      |
| hCoV-19/Japan/PG-89699/2021 | EPI_ISL_3900811 | 2021-09-02      |
| hCoV-19/Japan/PG-89700/2021 | EPI_ISL_3900812 | 2021-09-02      |
| hCoV-19/Japan/PG-89701/2021 | EPI_ISL_3900813 | 2021-09-02      |
| hCoV-19/Japan/PG-89702/2021 | EPI_ISL_3900814 | 2021-09-02      |
| hCoV-19/Japan/PG-89703/2021 | EPI_ISL_3900815 | 2021-09-02      |
| hCoV-19/Japan/PG-89704/2021 | EPI_ISL_3900816 | 2021-09-02      |
| hCoV-19/Japan/PG-89705/2021 | EPI_ISL_3900817 | 2021-09-02      |
| hCoV-19/Japan/PG-89706/2021 | EPI_ISL_3900818 | 2021-09-02      |
| hCoV-19/Japan/PG-89707/2021 | EPI_ISL_3900819 | 2021-09-02      |
| hCoV-19/Japan/PG-89708/2021 | EPI_ISL_3900820 | 2021-09-02      |
| hCoV-19/Japan/PG-89709/2021 | EPI_ISL_3900821 | 2021-09-02      |
| hCoV-19/Japan/PG-89710/2021 | EPI_ISL_3900822 | 2021-09-02      |
| hCoV-19/Japan/PG-89711/2021 | EPI_ISL_3900823 | 2021-09-02      |
| hCoV-19/Japan/PG-89712/2021 | EPI_ISL_3900824 | 2021-09-02      |
| hCoV-19/Japan/PG-89713/2021 | EPI_ISL_3900825 | 2021-09-02      |
| hCoV-19/Japan/PG-89714/2021 | EPI_ISL_3900826 | 2021-09-02      |
| hCoV-19/Japan/PG-89715/2021 | EPI_ISL_3900827 | 2021-09-02      |
| hCoV-19/Japan/PG-89716/2021 | EPI_ISL_3900828 | 2021-09-02      |
| hCoV-19/Japan/PG-89717/2021 | EPI_ISL_3900829 | 2021-09-02      |
| hCoV-19/Japan/PG-89718/2021 | EPI_ISL_3900830 | 2021-09-02      |
| hCoV-19/Japan/PG-89719/2021 | EPI_ISL_3900831 | 2021-09-02      |
| hCoV-19/Japan/PG-89720/2021 | EPI_ISL_3900832 | 2021-09-02      |
| hCoV-19/Japan/PG-89721/2021 | EPI_ISL_3900833 | 2021-09-02      |
| hCoV-19/Japan/PG-89722/2021 | EPI_ISL_3900834 | 2021-09-02      |
| hCoV-19/Japan/PG-89723/2021 | EPI_ISL_3900835 | 2021-09-02      |
| hCoV-19/Japan/PG-89724/2021 | EPI_ISL_3900836 | 2021-09-02      |
| hCoV-19/Japan/PG-89725/2021 | EPI_ISL_3900837 | 2021-09-02      |
| hCoV-19/Japan/PG-89726/2021 | EPI_ISL_3900838 | 2021-09-02      |
| hCoV-19/Japan/PG-89727/2021 | EPI_ISL_3900839 | 2021-09-02      |
| hCoV-19/Japan/PG-89728/2021 | EPI_ISL_3900840 | 2021-09-02      |
| hCoV-19/Japan/PG-89729/2021 | EPI_ISL_3900841 | 2021-09-02      |
| hCoV-19/Japan/PG-89730/2021 | EPI_ISL_3900842 | 2021-09-02      |
| hCoV-19/Japan/PG-89731/2021 | EPI_ISL_3900843 | 2021-09-02      |
| hCoV-19/Japan/PG-89732/2021 | EPI_ISL_3900844 | 2021-09-02      |
| hCoV-19/Japan/PG-89733/2021 | EPI_ISL_3900845 | 2021-09-02      |
| hCoV-19/Japan/PG-89734/2021 | EPI_ISL_3900846 | 2021-09-02      |
| hCoV-19/Japan/PG-89735/2021 | EPI_ISL_3900847 | 2021-09-02      |
| hCoV-19/Japan/PG-89736/2021 | EPI_ISL_3900848 | 2021-09-02      |
| hCoV-19/Japan/PG-89737/2021 | EPI_ISL_3900849 | 2021-09-02      |
| hCoV-19/Japan/PG-89738/2021 | EPI_ISL_3900850 | 2021-09-02      |
| hCoV-19/Japan/PG-89739/2021 | EPI_ISL_3900851 | 2021-09-02      |
| hCoV-19/Japan/PG-89740/2021 | EPI_ISL_3900852 | 2021-09-02      |
| hCoV-19/Japan/PG-89741/2021 | EPI_ISL_3872217 | 2021-09-02      |
| hCoV-19/Japan/PG-89742/2021 | EPI_ISL_3872218 | 2021-09-02      |
| hCoV-19/Japan/PG-89743/2021 | EPI_ISL_3872219 | 2021-09-02      |
| hCoV-19/Japan/PG-89744/2021 | EPI_ISL_3872220 | 2021-09-02      |
| hCoV-19/Japan/PG-89745/2021 | EPI_ISL_3872221 | 2021-09-02      |

| virus_name                  | epiID           | submission_date |
|-----------------------------|-----------------|-----------------|
| hCoV-19/Japan/PG-89746/2021 | EPI_ISL_3873952 | 2021-09-02      |
| hCoV-19/Japan/PG-89747/2021 | EPI_ISL_3873953 | 2021-09-02      |
| hCoV-19/Japan/PG-89748/2021 | EPI_ISL_3873954 | 2021-09-02      |
| hCoV-19/Japan/PG-89749/2021 | EPI_ISL_3873955 | 2021-09-02      |
| hCoV-19/Japan/PG-89750/2021 | EPI_ISL_3874683 | 2021-09-02      |
| hCoV-19/Japan/PG-89752/2021 | EPI_ISL_3874685 | 2021-09-02      |
| hCoV-19/Japan/PG-89753/2021 | EPI_ISL_3874686 | 2021-09-02      |
| hCoV-19/Japan/PG-89754/2021 | EPI_ISL_3874687 | 2021-09-02      |
| hCoV-19/Japan/PG-89755/2021 | EPI_ISL_3874688 | 2021-09-02      |
| hCoV-19/Japan/PG-89756/2021 | EPI_ISL_3874689 | 2021-09-02      |
| hCoV-19/Japan/PG-89757/2021 | EPI_ISL_3874691 | 2021-09-02      |
| hCoV-19/Japan/PG-89762/2021 | EPI_ISL_3874693 | 2021-09-02      |
| hCoV-19/Japan/PG-89764/2021 | EPI_ISL_3874695 | 2021-09-02      |
| hCoV-19/Japan/PG-89765/2021 | EPI_ISL_3874696 | 2021-09-02      |
| hCoV-19/Japan/PG-89767/2021 | EPI_ISL_3874698 | 2021-09-02      |
| hCoV-19/Japan/PG-89768/2021 | EPI_ISL_3874700 | 2021-09-02      |
| hCoV-19/Japan/PG-89769/2021 | EPI_ISL_3874702 | 2021-09-02      |
| hCoV-19/Japan/PG-89770/2021 | EPI_ISL_3874703 | 2021-09-02      |
| hCoV-19/Japan/PG-89771/2021 | EPI_ISL_3874705 | 2021-09-02      |
| hCoV-19/Japan/PG-89772/2021 | EPI_ISL_3874707 | 2021-09-02      |
| hCoV-19/Japan/PG-89773/2021 | EPI_ISL_3875196 | 2021-09-02      |
| hCoV-19/Japan/PG-89774/2021 | EPI_ISL_3875197 | 2021-09-02      |
| hCoV-19/Japan/PG-89775/2021 | EPI_ISL_3875198 | 2021-09-02      |
| hCoV-19/Japan/PG-89776/2021 | EPI_ISL_3875199 | 2021-09-02      |
| hCoV-19/Japan/PG-89777/2021 | EPI_ISL_3875200 | 2021-09-02      |
| hCoV-19/Japan/PG-89778/2021 | EPI_ISL_3875201 | 2021-09-02      |
| hCoV-19/Japan/PG-89779/2021 | EPI_ISL_3875202 | 2021-09-02      |
| hCoV-19/Japan/PG-89780/2021 | EPI_ISL_3875203 | 2021-09-02      |
| hCoV-19/Japan/PG-89781/2021 | EPI_ISL_3875204 | 2021-09-02      |
| hCoV-19/Japan/PG-89782/2021 | EPI_ISL_3875205 | 2021-09-02      |
| hCoV-19/Japan/PG-89783/2021 | EPI_ISL_3875206 | 2021-09-02      |
| hCoV-19/Japan/PG-89784/2021 | EPI_ISL_3875207 | 2021-09-02      |
| hCoV-19/Japan/PG-89785/2021 | EPI_ISL_3875208 | 2021-09-02      |
| hCoV-19/Japan/PG-89786/2021 | EPI_ISL_3875209 | 2021-09-02      |
| hCoV-19/Japan/PG-89787/2021 | EPI_ISL_3875210 | 2021-09-02      |
| hCoV-19/Japan/PG-89788/2021 | EPI_ISL_3875211 | 2021-09-02      |
| hCoV-19/Japan/PG-89789/2021 | EPI_ISL_3875212 | 2021-09-02      |
| hCoV-19/Japan/PG-89790/2021 | EPI_ISL_3875213 | 2021-09-02      |
| hCoV-19/Japan/PG-89791/2021 | EPI_ISL_3875214 | 2021-09-02      |
| hCoV-19/Japan/PG-89792/2021 | EPI_ISL_3875215 | 2021-09-02      |
| hCoV-19/Japan/PG-89793/2021 | EPI_ISL_3875216 | 2021-09-02      |
| hCoV-19/Japan/PG-89794/2021 | EPI_ISL_3875217 | 2021-09-02      |
| hCoV-19/Japan/PG-89795/2021 | EPI_ISL_3875218 | 2021-09-02      |
| hCoV-19/Japan/PG-89796/2021 | EPI_ISL_3875219 | 2021-09-02      |
| hCoV-19/Japan/PG-89797/2021 | EPI_ISL_3875220 | 2021-09-02      |
| hCoV-19/Japan/PG-89798/2021 | EPI_ISL_3875221 | 2021-09-02      |
| hCoV-19/Japan/PG-89799/2021 | EPI_ISL_3875222 | 2021-09-02      |
| hCoV-19/Japan/PG-89800/2021 | EPI_ISL_3875223 | 2021-09-02      |
| hCoV-19/Japan/PG-89801/2021 | EPI_ISL_3875224 | 2021-09-02      |
| hCoV-19/Japan/PG-89802/2021 | EPI_ISL_3875225 | 2021-09-02      |
| hCoV-19/Japan/PG-89803/2021 | EPI_ISL_3875226 | 2021-09-02      |
| hCoV-19/Japan/PG-89804/2021 | EPI_ISL_3875227 | 2021-09-02      |
| hCoV-19/Japan/PG-89805/2021 | EPI_ISL_3875228 | 2021-09-02      |
| hCoV-19/Japan/PG-89806/2021 | EPI_ISL_3875229 | 2021-09-02      |

| virus_name                  | epiID           | submission_date |
|-----------------------------|-----------------|-----------------|
| hCoV-19/Japan/PG-89807/2021 | EPI_ISL_3875230 | 2021-09-02      |
| hCoV-19/Japan/PG-89808/2021 | EPI_ISL_3875231 | 2021-09-02      |
| hCoV-19/Japan/PG-89809/2021 | EPI_ISL_3875232 | 2021-09-02      |
| hCoV-19/Japan/PG-89810/2021 | EPI_ISL_3875233 | 2021-09-02      |
| hCoV-19/Japan/PG-89811/2021 | EPI_ISL_3875234 | 2021-09-02      |
| hCoV-19/Japan/PG-89812/2021 | EPI_ISL_3875235 | 2021-09-02      |
| hCoV-19/Japan/PG-89813/2021 | EPI_ISL_3875236 | 2021-09-02      |
| hCoV-19/Japan/PG-89814/2021 | EPI_ISL_3875237 | 2021-09-02      |
| hCoV-19/Japan/PG-89815/2021 | EPI_ISL_3875238 | 2021-09-02      |
| hCoV-19/Japan/PG-89816/2021 | EPI_ISL_3875239 | 2021-09-02      |
| hCoV-19/Japan/PG-89817/2021 | EPI_ISL_3875240 | 2021-09-02      |
| hCoV-19/Japan/PG-89818/2021 | EPI_ISL_3875241 | 2021-09-02      |
| hCoV-19/Japan/PG-89819/2021 | EPI_ISL_3875242 | 2021-09-02      |
| hCoV-19/Japan/PG-89820/2021 | EPI_ISL_3875243 | 2021-09-02      |
| hCoV-19/Japan/PG-89821/2021 | EPI_ISL_3875244 | 2021-09-02      |
| hCoV-19/Japan/PG-89822/2021 | EPI_ISL_3875245 | 2021-09-02      |
| hCoV-19/Japan/PG-89847/2021 | EPI_ISL_3875246 | 2021-09-02      |
| hCoV-19/Japan/PG-89848/2021 | EPI_ISL_3875247 | 2021-09-02      |
| hCoV-19/Japan/PG-89849/2021 | EPI_ISL_3875248 | 2021-09-02      |
| hCoV-19/Japan/PG-89850/2021 | EPI_ISL_3875249 | 2021-09-02      |
| hCoV-19/Japan/PG-89851/2021 | EPI_ISL_3875250 | 2021-09-02      |
| hCoV-19/Japan/PG-89852/2021 | EPI_ISL_3875251 | 2021-09-02      |
| hCoV-19/Japan/PG-89853/2021 | EPI_ISL_3875252 | 2021-09-02      |
| hCoV-19/Japan/PG-89854/2021 | EPI_ISL_3875253 | 2021-09-02      |
| hCoV-19/Japan/PG-89855/2021 | EPI_ISL_3875254 | 2021-09-02      |
| hCoV-19/Japan/PG-89856/2021 | EPI_ISL_3875255 | 2021-09-02      |
| hCoV-19/Japan/PG-89857/2021 | EPI_ISL_3875256 | 2021-09-02      |
| hCoV-19/Japan/PG-89858/2021 | EPI_ISL_3875257 | 2021-09-02      |
| hCoV-19/Japan/PG-89859/2021 | EPI_ISL_3875258 | 2021-09-02      |
| hCoV-19/Japan/PG-89860/2021 | EPI_ISL_3875259 | 2021-09-02      |
| hCoV-19/Japan/PG-89861/2021 | EPI_ISL_3875260 | 2021-09-02      |
| hCoV-19/Japan/PG-89862/2021 | EPI_ISL_3875261 | 2021-09-02      |
| hCoV-19/Japan/PG-89863/2021 | EPI_ISL_3875262 | 2021-09-02      |
| hCoV-19/Japan/PG-89864/2021 | EPI_ISL_3875263 | 2021-09-02      |
| hCoV-19/Japan/PG-89865/2021 | EPI_ISL_3875264 | 2021-09-02      |
| hCoV-19/Japan/PG-89866/2021 | EPI_ISL_3875265 | 2021-09-02      |
| hCoV-19/Japan/PG-89867/2021 | EPI_ISL_3875266 | 2021-09-02      |
| hCoV-19/Japan/PG-89868/2021 | EPI_ISL_3875267 | 2021-09-02      |
| hCoV-19/Japan/PG-89869/2021 | EPI_ISL_3875268 | 2021-09-02      |
| hCoV-19/Japan/PG-89870/2021 | EPI_ISL_3875269 | 2021-09-02      |
| hCoV-19/Japan/PG-89871/2021 | EPI_ISL_3875270 | 2021-09-02      |
| hCoV-19/Japan/PG-89872/2021 | EPI_ISL_3875271 | 2021-09-02      |
| hCoV-19/Japan/PG-89873/2021 | EPI_ISL_3875272 | 2021-09-02      |
| hCoV-19/Japan/PG-89874/2021 | EPI_ISL_3875273 | 2021-09-02      |
| hCoV-19/Japan/PG-89875/2021 | EPI_ISL_3875274 | 2021-09-02      |
| hCoV-19/Japan/PG-89876/2021 | EPI_ISL_3875275 | 2021-09-02      |
| hCoV-19/Japan/PG-89877/2021 | EPI_ISL_3875276 | 2021-09-02      |
| hCoV-19/Japan/PG-89878/2021 | EPI_ISL_3871430 | 2021-09-02      |
| hCoV-19/Japan/PG-89879/2021 | EPI_ISL_3871431 | 2021-09-02      |
| hCoV-19/Japan/PG-89880/2021 | EPI_ISL_3871432 | 2021-09-02      |
| hCoV-19/Japan/PG-89881/2021 | EPI_ISL_3871433 | 2021-09-02      |
| hCoV-19/Japan/PG-89882/2021 | EPI_ISL_3871434 | 2021-09-02      |
| hCoV-19/Japan/PG-89883/2021 | EPI_ISL_3871435 | 2021-09-02      |
| hCoV-19/Japan/PG-89884/2021 | EPI_ISL_3871436 | 2021-09-02      |

| virus_name                  | epiID           | submission_date |
|-----------------------------|-----------------|-----------------|
| hCoV-19/Japan/PG-89885/2021 | EPI_ISL_3871437 | 2021-09-02      |
| hCoV-19/Japan/PG-89886/2021 | EPI_ISL_3871438 | 2021-09-02      |
| hCoV-19/Japan/PG-89887/2021 | EPI_ISL_3871439 | 2021-09-02      |
| hCoV-19/Japan/PG-89888/2021 | EPI_ISL_3871440 | 2021-09-02      |
| hCoV-19/Japan/PG-89889/2021 | EPI_ISL_3871441 | 2021-09-02      |
| hCoV-19/Japan/PG-89890/2021 | EPI_ISL_3871442 | 2021-09-02      |
| hCoV-19/Japan/PG-89900/2021 | EPI_ISL_3871706 | 2021-09-02      |
| hCoV-19/Japan/PG-89901/2021 | EPI_ISL_3876195 | 2021-09-02      |
| hCoV-19/Japan/PG-89902/2021 | EPI_ISL_3876196 | 2021-09-02      |
| hCoV-19/Japan/PG-89904/2021 | EPI_ISL_3876197 | 2021-09-02      |
| hCoV-19/Japan/PG-89906/2021 | EPI_ISL_3876198 | 2021-09-02      |
| hCoV-19/Japan/PG-89907/2021 | EPI_ISL_3876199 | 2021-09-02      |
| hCoV-19/Japan/PG-89908/2021 | EPI_ISL_3876200 | 2021-09-02      |
| hCoV-19/Japan/PG-89909/2021 | EPI_ISL_3876202 | 2021-09-02      |
| hCoV-19/Japan/PG-89910/2021 | EPI_ISL_3876206 | 2021-09-02      |
| hCoV-19/Japan/PG-89912/2021 | EPI_ISL_3876209 | 2021-09-02      |
| hCoV-19/Japan/PG-89913/2021 | EPI_ISL_3876212 | 2021-09-02      |
| hCoV-19/Japan/PG-89914/2021 | EPI_ISL_3876215 | 2021-09-02      |
| hCoV-19/Japan/PG-89915/2021 | EPI_ISL_3876219 | 2021-09-02      |
| hCoV-19/Japan/PG-89916/2021 | EPI_ISL_3876221 | 2021-09-02      |
| hCoV-19/Japan/PG-89917/2021 | EPI_ISL_3876225 | 2021-09-02      |
| hCoV-19/Japan/PG-89918/2021 | EPI_ISL_3876228 | 2021-09-02      |
| hCoV-19/Japan/PG-89919/2021 | EPI_ISL_3876231 | 2021-09-02      |
| hCoV-19/Japan/PG-89920/2021 | EPI_ISL_3876235 | 2021-09-02      |
| hCoV-19/Japan/PG-89921/2021 | EPI_ISL_3876238 | 2021-09-02      |
| hCoV-19/Japan/PG-89925/2021 | EPI_ISL_3876241 | 2021-09-02      |
| hCoV-19/Japan/PG-89926/2021 | EPI_ISL_3876243 | 2021-09-02      |
| hCoV-19/Japan/PG-89927/2021 | EPI_ISL_3876244 | 2021-09-02      |
| hCoV-19/Japan/PG-89928/2021 | EPI_ISL_3876245 | 2021-09-02      |
| hCoV-19/Japan/PG-89929/2021 | EPI_ISL_3876246 | 2021-09-02      |
| hCoV-19/Japan/PG-89930/2021 | EPI_ISL_3876247 | 2021-09-02      |
| hCoV-19/Japan/PG-89931/2021 | EPI_ISL_3876248 | 2021-09-02      |
| hCoV-19/Japan/PG-89932/2021 | EPI_ISL_3876249 | 2021-09-02      |
| hCoV-19/Japan/PG-89933/2021 | EPI_ISL_3876250 | 2021-09-02      |
| hCoV-19/Japan/PG-89935/2021 | EPI_ISL_3876251 | 2021-09-02      |
| hCoV-19/Japan/PG-89936/2021 | EPI_ISL_3876252 | 2021-09-02      |
| hCoV-19/Japan/PG-89937/2021 | EPI_ISL_3876253 | 2021-09-02      |
| hCoV-19/Japan/PG-89938/2021 | EPI_ISL_3876254 | 2021-09-02      |
| hCoV-19/Japan/PG-89939/2021 | EPI_ISL_3876255 | 2021-09-02      |
| hCoV-19/Japan/PG-89970/2021 | EPI_ISL_3873487 | 2021-09-02      |
| hCoV-19/Japan/PG-89971/2021 | EPI_ISL_3873488 | 2021-09-02      |
| hCoV-19/Japan/PG-89972/2021 | EPI_ISL_3873489 | 2021-09-02      |
| hCoV-19/Japan/PG-89973/2021 | EPI_ISL_3873490 | 2021-09-02      |
| hCoV-19/Japan/PG-89974/2021 | EPI_ISL_3873491 | 2021-09-02      |
| hCoV-19/Japan/PG-89975/2021 | EPI_ISL_3873492 | 2021-09-02      |
| hCoV-19/Japan/PG-89976/2021 | EPI_ISL_3873493 | 2021-09-02      |
| hCoV-19/Japan/PG-89977/2021 | EPI_ISL_3873494 | 2021-09-02      |
| hCoV-19/Japan/PG-89978/2021 | EPI_ISL_3873495 | 2021-09-02      |
| hCoV-19/Japan/PG-89979/2021 | EPI_ISL_3873496 | 2021-09-02      |
| hCoV-19/Japan/PG-89980/2021 | EPI_ISL_3873497 | 2021-09-02      |
| hCoV-19/Japan/PG-89981/2021 | EPI_ISL_3873498 | 2021-09-02      |
| hCoV-19/Japan/PG-89982/2021 | EPI_ISL_3873499 | 2021-09-02      |
| hCoV-19/Japan/PG-89983/2021 | EPI_ISL_3873500 | 2021-09-02      |
| hCoV-19/Japan/PG-89984/2021 | EPI_ISL_3873501 | 2021-09-02      |

| virus_name                  | epiID           | submission_date |
|-----------------------------|-----------------|-----------------|
| hCoV-19/Japan/PG-89989/2021 | EPI_ISL_3872497 | 2021-09-02      |
| hCoV-19/Japan/PG-89990/2021 | EPI_ISL_3872498 | 2021-09-02      |
| hCoV-19/Japan/PG-89991/2021 | EPI_ISL_3872499 | 2021-09-02      |
| hCoV-19/Japan/PG-89992/2021 | EPI_ISL_3872500 | 2021-09-02      |
| hCoV-19/Japan/PG-89993/2021 | EPI_ISL_3872501 | 2021-09-02      |
| hCoV-19/Japan/PG-89995/2021 | EPI_ISL_3872502 | 2021-09-02      |
| hCoV-19/Japan/PG-89996/2021 | EPI_ISL_3872503 | 2021-09-02      |
| hCoV-19/Japan/PG-89997/2021 | EPI_ISL_3872504 | 2021-09-02      |
| hCoV-19/Japan/PG-89998/2021 | EPI_ISL_3872505 | 2021-09-02      |
| hCoV-19/Japan/PG-89999/2021 | EPI_ISL_3872506 | 2021-09-02      |
| hCoV-19/Japan/PG-90001/2021 | EPI_ISL_3872507 | 2021-09-02      |
| hCoV-19/Japan/PG-90002/2021 | EPI_ISL_3872508 | 2021-09-02      |
| hCoV-19/Japan/PG-90005/2021 | EPI_ISL_3872509 | 2021-09-02      |
| hCoV-19/Japan/PG-90009/2021 | EPI_ISL_3872510 | 2021-09-02      |
| hCoV-19/Japan/PG-90039/2021 | EPI_ISL_3873232 | 2021-09-02      |
| hCoV-19/Japan/PG-90040/2021 | EPI_ISL_3873233 | 2021-09-02      |
| hCoV-19/Japan/PG-90041/2021 | EPI_ISL_3873234 | 2021-09-02      |
| hCoV-19/Japan/PG-90042/2021 | EPI_ISL_3873235 | 2021-09-02      |
| hCoV-19/Japan/PG-90043/2021 | EPI_ISL_3873236 | 2021-09-02      |
| hCoV-19/Japan/PG-90044/2021 | EPI_ISL_3873237 | 2021-09-02      |
| hCoV-19/Japan/PG-90045/2021 | EPI_ISL_3873238 | 2021-09-02      |
| hCoV-19/Japan/PG-90046/2021 | EPI_ISL_3873239 | 2021-09-02      |
| hCoV-19/Japan/PG-90047/2021 | EPI_ISL_3873240 | 2021-09-02      |
| hCoV-19/Japan/PG-90048/2021 | EPI_ISL_3873241 | 2021-09-02      |
| hCoV-19/Japan/PG-90049/2021 | EPI_ISL_3873242 | 2021-09-02      |
| hCoV-19/Japan/PG-90050/2021 | EPI_ISL_3873243 | 2021-09-02      |
| hCoV-19/Japan/PG-90051/2021 | EPI_ISL_3873244 | 2021-09-02      |
| hCoV-19/Japan/PG-90052/2021 | EPI_ISL_3873245 | 2021-09-02      |
| hCoV-19/Japan/PG-90053/2021 | EPI_ISL_3873246 | 2021-09-02      |
| hCoV-19/Japan/PG-90054/2021 | EPI_ISL_3873247 | 2021-09-02      |
| hCoV-19/Japan/PG-90055/2021 | EPI_ISL_3873248 | 2021-09-02      |
| hCoV-19/Japan/PG-90056/2021 | EPI_ISL_3873249 | 2021-09-02      |
| hCoV-19/Japan/PG-90057/2021 | EPI_ISL_3873250 | 2021-09-02      |
| hCoV-19/Japan/PG-90058/2021 | EPI_ISL_3873251 | 2021-09-02      |
| hCoV-19/Japan/PG-90059/2021 | EPI_ISL_3873252 | 2021-09-02      |
| hCoV-19/Japan/PG-90060/2021 | EPI_ISL_3873253 | 2021-09-02      |
| hCoV-19/Japan/PG-90070/2021 | EPI_ISL_3873254 | 2021-09-02      |
| hCoV-19/Japan/PG-90071/2021 | EPI_ISL_3873255 | 2021-09-02      |
| hCoV-19/Japan/PG-90072/2021 | EPI_ISL_3873256 | 2021-09-02      |
| hCoV-19/Japan/PG-90073/2021 | EPI_ISL_3873257 | 2021-09-02      |
| hCoV-19/Japan/PG-90074/2021 | EPI_ISL_3873258 | 2021-09-02      |
| hCoV-19/Japan/PG-90075/2021 | EPI_ISL_3873259 | 2021-09-02      |
| hCoV-19/Japan/PG-90076/2021 | EPI_ISL_3873260 | 2021-09-02      |
| hCoV-19/Japan/PG-90077/2021 | EPI_ISL_3873261 | 2021-09-02      |
| hCoV-19/Japan/PG-90078/2021 | EPI_ISL_3873262 | 2021-09-02      |
| hCoV-19/Japan/PG-90079/2021 | EPI_ISL_3873263 | 2021-09-02      |
| hCoV-19/Japan/PG-90080/2021 | EPI_ISL_3873264 | 2021-09-02      |
| hCoV-19/Japan/PG-90081/2021 | EPI_ISL_3873265 | 2021-09-02      |
| hCoV-19/Japan/PG-90082/2021 | EPI_ISL_3873266 | 2021-09-02      |
| hCoV-19/Japan/PG-90083/2021 | EPI_ISL_3873267 | 2021-09-02      |
| hCoV-19/Japan/PG-90101/2021 | EPI_ISL_3873268 | 2021-09-02      |
| hCoV-19/Japan/PG-90102/2021 | EPI_ISL_3873269 | 2021-09-02      |
| hCoV-19/Japan/PG-90103/2021 | EPI_ISL_3873270 | 2021-09-02      |
| hCoV-19/Japan/PG-90104/2021 | EPI_ISL_3873271 | 2021-09-02      |

| virus_name                  | epiID           | submission_date |
|-----------------------------|-----------------|-----------------|
| hCoV-19/Japan/PG-90108/2021 | EPI_ISL_3873272 | 2021-09-02      |
| hCoV-19/Japan/PG-90109/2021 | EPI_ISL_3873273 | 2021-09-02      |
| hCoV-19/Japan/PG-90110/2021 | EPI_ISL_3871668 | 2021-09-02      |
| hCoV-19/Japan/PG-90111/2021 | EPI_ISL_3871669 | 2021-09-02      |
| hCoV-19/Japan/PG-90112/2021 | EPI_ISL_3871670 | 2021-09-02      |
| hCoV-19/Japan/PG-90113/2021 | EPI_ISL_3871671 | 2021-09-02      |
| hCoV-19/Japan/PG-90114/2021 | EPI_ISL_3871672 | 2021-09-02      |
| hCoV-19/Japan/PG-90115/2021 | EPI_ISL_3871673 | 2021-09-02      |
| hCoV-19/Japan/PG-90116/2021 | EPI_ISL_3871674 | 2021-09-02      |
| hCoV-19/Japan/PG-90117/2021 | EPI_ISL_3871675 | 2021-09-02      |
| hCoV-19/Japan/PG-90118/2021 | EPI_ISL_3871676 | 2021-09-02      |
| hCoV-19/Japan/PG-90119/2021 | EPI_ISL_3871677 | 2021-09-02      |
| hCoV-19/Japan/PG-90120/2021 | EPI_ISL_3871678 | 2021-09-02      |
| hCoV-19/Japan/PG-90121/2021 | EPI_ISL_3871679 | 2021-09-02      |
| hCoV-19/Japan/PG-90122/2021 | EPI_ISL_3871680 | 2021-09-02      |
| hCoV-19/Japan/PG-90123/2021 | EPI_ISL_3871544 | 2021-09-02      |
| hCoV-19/Japan/PG-90124/2021 | EPI_ISL_3871545 | 2021-09-02      |
| hCoV-19/Japan/PG-90125/2021 | EPI_ISL_3871546 | 2021-09-02      |
| hCoV-19/Japan/PG-90126/2021 | EPI_ISL_3871547 | 2021-09-02      |
| hCoV-19/Japan/PG-90127/2021 | EPI_ISL_3871548 | 2021-09-02      |
| hCoV-19/Japan/PG-90128/2021 | EPI_ISL_3871549 | 2021-09-02      |
| hCoV-19/Japan/PG-90129/2021 | EPI_ISL_3871550 | 2021-09-02      |
| hCoV-19/Japan/PG-90130/2021 | EPI_ISL_3871551 | 2021-09-02      |
| hCoV-19/Japan/PG-90131/2021 | EPI_ISL_3871552 | 2021-09-02      |
| hCoV-19/Japan/PG-90132/2021 | EPI_ISL_3871553 | 2021-09-02      |
| hCoV-19/Japan/PG-90133/2021 | EPI_ISL_3871554 | 2021-09-02      |
| hCoV-19/Japan/PG-90134/2021 | EPI_ISL_3871555 | 2021-09-02      |
| hCoV-19/Japan/PG-90135/2021 | EPI_ISL_3871556 | 2021-09-02      |
| hCoV-19/Japan/PG-90136/2021 | EPI_ISL_3871557 | 2021-09-02      |
| hCoV-19/Japan/PG-90137/2021 | EPI_ISL_3871558 | 2021-09-02      |
| hCoV-19/Japan/PG-90138/2021 | EPI_ISL_3871559 | 2021-09-02      |
| hCoV-19/Japan/PG-90139/2021 | EPI_ISL_3871560 | 2021-09-02      |
| hCoV-19/Japan/PG-90140/2021 | EPI_ISL_3871561 | 2021-09-02      |
| hCoV-19/Japan/PG-90141/2021 | EPI_ISL_3871562 | 2021-09-02      |
| hCoV-19/Japan/PG-90142/2021 | EPI_ISL_3874518 | 2021-09-02      |
| hCoV-19/Japan/PG-90154/2021 | EPI_ISL_3871120 | 2021-09-02      |
| hCoV-19/Japan/PG-90155/2021 | EPI_ISL_3871121 | 2021-09-02      |
| hCoV-19/Japan/PG-90156/2021 | EPI_ISL_3871122 | 2021-09-02      |
| hCoV-19/Japan/PG-90157/2021 | EPI_ISL_3871123 | 2021-09-02      |
| hCoV-19/Japan/PG-90158/2021 | EPI_ISL_3871124 | 2021-09-02      |
| hCoV-19/Japan/PG-90159/2021 | EPI_ISL_3871125 | 2021-09-02      |
| hCoV-19/Japan/PG-90162/2021 | EPI_ISL_3871126 | 2021-09-02      |
| hCoV-19/Japan/PG-90164/2021 | EPI_ISL_3871127 | 2021-09-02      |
| hCoV-19/Japan/PG-90166/2021 | EPI_ISL_3871128 | 2021-09-02      |
| hCoV-19/Japan/PG-90167/2021 | EPI_ISL_3871129 | 2021-09-02      |
| hCoV-19/Japan/PG-90168/2021 | EPI_ISL_3871130 | 2021-09-02      |
| hCoV-19/Japan/PG-90169/2021 | EPI_ISL_3871131 | 2021-09-02      |
| hCoV-19/Japan/PG-90170/2021 | EPI_ISL_3871132 | 2021-09-02      |
| hCoV-19/Japan/PG-90171/2021 | EPI_ISL_3871133 | 2021-09-02      |
| hCoV-19/Japan/PG-90172/2021 | EPI_ISL_3871134 | 2021-09-02      |
| hCoV-19/Japan/PG-90173/2021 | EPI_ISL_3871135 | 2021-09-02      |
| hCoV-19/Japan/PG-90174/2021 | EPI_ISL_3871136 | 2021-09-02      |
| hCoV-19/Japan/PG-90175/2021 | EPI_ISL_3871137 | 2021-09-02      |
| hCoV-19/Japan/PG-90176/2021 | EPI_ISL_3871138 | 2021-09-02      |

| virus_name                  | epiID           | submission_date |
|-----------------------------|-----------------|-----------------|
| hCoV-19/Japan/PG-90203/2021 | EPI_ISL_3874395 | 2021-09-02      |
| hCoV-19/Japan/PG-90204/2021 | EPI_ISL_3874396 | 2021-09-02      |
| hCoV-19/Japan/PG-90218/2021 | EPI_ISL_3874397 | 2021-09-02      |
| hCoV-19/Japan/PG-90220/2021 | EPI_ISL_3874398 | 2021-09-02      |
| hCoV-19/Japan/PG-90224/2021 | EPI_ISL_3872222 | 2021-09-02      |
| hCoV-19/Japan/PG-90225/2021 | EPI_ISL_3872223 | 2021-09-02      |
| hCoV-19/Japan/PG-90226/2021 | EPI_ISL_3872224 | 2021-09-02      |
| hCoV-19/Japan/PG-90227/2021 | EPI_ISL_3872225 | 2021-09-02      |
| hCoV-19/Japan/PG-90228/2021 | EPI_ISL_3872226 | 2021-09-02      |
| hCoV-19/Japan/PG-90230/2021 | EPI_ISL_3872227 | 2021-09-02      |
| hCoV-19/Japan/PG-90231/2021 | EPI_ISL_3872228 | 2021-09-02      |
| hCoV-19/Japan/PG-90233/2021 | EPI_ISL_3872229 | 2021-09-02      |
| hCoV-19/Japan/PG-90234/2021 | EPI_ISL_3872230 | 2021-09-02      |
| hCoV-19/Japan/PG-90248/2021 | EPI_ISL_3900853 | 2021-09-02      |
| hCoV-19/Japan/PG-90249/2021 | EPI_ISL_3900854 | 2021-09-02      |
| hCoV-19/Japan/PG-90250/2021 | EPI_ISL_3900855 | 2021-09-02      |
| hCoV-19/Japan/PG-90251/2021 | EPI_ISL_3900856 | 2021-09-02      |
| hCoV-19/Japan/PG-90252/2021 | EPI_ISL_3900857 | 2021-09-02      |
| hCoV-19/Japan/PG-90253/2021 | EPI_ISL_3900858 | 2021-09-02      |
| hCoV-19/Japan/PG-90254/2021 | EPI_ISL_3900859 | 2021-09-02      |
| hCoV-19/Japan/PG-90255/2021 | EPI_ISL_3900860 | 2021-09-02      |
| hCoV-19/Japan/PG-90256/2021 | EPI_ISL_3900861 | 2021-09-02      |
| hCoV-19/Japan/PG-90257/2021 | EPI_ISL_3900862 | 2021-09-02      |
| hCoV-19/Japan/PG-90258/2021 | EPI_ISL_3900863 | 2021-09-02      |
| hCoV-19/Japan/PG-90259/2021 | EPI_ISL_3900864 | 2021-09-02      |
| hCoV-19/Japan/PG-90260/2021 | EPI_ISL_3900865 | 2021-09-02      |
| hCoV-19/Japan/PG-90261/2021 | EPI_ISL_3900866 | 2021-09-02      |
| hCoV-19/Japan/PG-90262/2021 | EPI_ISL_3900867 | 2021-09-02      |
| hCoV-19/Japan/PG-90263/2021 | EPI_ISL_3900868 | 2021-09-02      |
| hCoV-19/Japan/PG-90264/2021 | EPI_ISL_3900869 | 2021-09-02      |
| hCoV-19/Japan/PG-90265/2021 | EPI_ISL_3900870 | 2021-09-02      |
| hCoV-19/Japan/PG-90266/2021 | EPI_ISL_3900871 | 2021-09-02      |
| hCoV-19/Japan/PG-90267/2021 | EPI_ISL_3900872 | 2021-09-02      |
| hCoV-19/Japan/PG-90268/2021 | EPI_ISL_3900873 | 2021-09-02      |
| hCoV-19/Japan/PG-90269/2021 | EPI_ISL_3900874 | 2021-09-02      |
| hCoV-19/Japan/PG-90270/2021 | EPI_ISL_3900875 | 2021-09-02      |
| hCoV-19/Japan/PG-90271/2021 | EPI_ISL_3900876 | 2021-09-02      |
| hCoV-19/Japan/PG-90272/2021 | EPI_ISL_3900877 | 2021-09-02      |
| hCoV-19/Japan/PG-90273/2021 | EPI_ISL_3900878 | 2021-09-02      |
| hCoV-19/Japan/PG-90274/2021 | EPI_ISL_3900879 | 2021-09-02      |
| hCoV-19/Japan/PG-90275/2021 | EPI_ISL_3900880 | 2021-09-02      |
| hCoV-19/Japan/PG-90276/2021 | EPI_ISL_3900881 | 2021-09-02      |
| hCoV-19/Japan/PG-90277/2021 | EPI_ISL_3900882 | 2021-09-02      |
| hCoV-19/Japan/PG-90278/2021 | EPI_ISL_3900883 | 2021-09-02      |
| hCoV-19/Japan/PG-90279/2021 | EPI_ISL_3900884 | 2021-09-02      |
| hCoV-19/Japan/PG-90280/2021 | EPI_ISL_3900885 | 2021-09-02      |
| hCoV-19/Japan/PG-90281/2021 | EPI_ISL_3900886 | 2021-09-02      |
| hCoV-19/Japan/PG-90282/2021 | EPI_ISL_3900887 | 2021-09-02      |
| hCoV-19/Japan/PG-90283/2021 | EPI_ISL_3900888 | 2021-09-02      |
| hCoV-19/Japan/PG-90284/2021 | EPI_ISL_3900889 | 2021-09-02      |
| hCoV-19/Japan/PG-90285/2021 | EPI_ISL_3900890 | 2021-09-02      |
| hCoV-19/Japan/PG-90286/2021 | EPI_ISL_3900891 | 2021-09-02      |
| hCoV-19/Japan/PG-90287/2021 | EPI_ISL_3900892 | 2021-09-02      |
| hCoV-19/Japan/PG-90288/2021 | EPI_ISL_3900893 | 2021-09-02      |

| virus_name                  | epiID           | submission_date |
|-----------------------------|-----------------|-----------------|
| hCoV-19/Japan/PG-90289/2021 | EPI_ISL_3900894 | 2021-09-02      |
| hCoV-19/Japan/PG-90290/2021 | EPI_ISL_3900895 | 2021-09-02      |
| hCoV-19/Japan/PG-90291/2021 | EPI_ISL_3900896 | 2021-09-02      |
| hCoV-19/Japan/PG-90292/2021 | EPI_ISL_3900897 | 2021-09-02      |
| hCoV-19/Japan/PG-90293/2021 | EPI_ISL_3900898 | 2021-09-02      |
| hCoV-19/Japan/PG-90294/2021 | EPI_ISL_3900899 | 2021-09-02      |
| hCoV-19/Japan/PG-90295/2021 | EPI_ISL_3900900 | 2021-09-02      |
| hCoV-19/Japan/PG-90296/2021 | EPI_ISL_3900901 | 2021-09-02      |
| hCoV-19/Japan/PG-90297/2021 | EPI_ISL_3900902 | 2021-09-02      |
| hCoV-19/Japan/PG-90298/2021 | EPI_ISL_3900903 | 2021-09-02      |
| hCoV-19/Japan/PG-90299/2021 | EPI_ISL_3900904 | 2021-09-02      |
| hCoV-19/Japan/PG-90300/2021 | EPI_ISL_3900905 | 2021-09-02      |
| hCoV-19/Japan/PG-90301/2021 | EPI_ISL_3900906 | 2021-09-02      |
| hCoV-19/Japan/PG-90302/2021 | EPI_ISL_3900907 | 2021-09-02      |
| hCoV-19/Japan/PG-90303/2021 | EPI_ISL_3900908 | 2021-09-02      |
| hCoV-19/Japan/PG-90304/2021 | EPI_ISL_3900909 | 2021-09-02      |
| hCoV-19/Japan/PG-90305/2021 | EPI_ISL_3900910 | 2021-09-02      |
| hCoV-19/Japan/PG-90306/2021 | EPI_ISL_3900911 | 2021-09-02      |
| hCoV-19/Japan/PG-90307/2021 | EPI_ISL_3900912 | 2021-09-02      |
| hCoV-19/Japan/PG-90308/2021 | EPI_ISL_3900913 | 2021-09-02      |
| hCoV-19/Japan/PG-90309/2021 | EPI_ISL_3900914 | 2021-09-02      |
| hCoV-19/Japan/PG-90310/2021 | EPI_ISL_3900915 | 2021-09-02      |
| hCoV-19/Japan/PG-90311/2021 | EPI_ISL_3900916 | 2021-09-02      |
| hCoV-19/Japan/PG-90312/2021 | EPI_ISL_3900917 | 2021-09-02      |
| hCoV-19/Japan/PG-90313/2021 | EPI_ISL_3900918 | 2021-09-02      |
| hCoV-19/Japan/PG-90314/2021 | EPI_ISL_3900919 | 2021-09-02      |
| hCoV-19/Japan/PG-90315/2021 | EPI_ISL_3900920 | 2021-09-02      |
| hCoV-19/Japan/PG-90316/2021 | EPI_ISL_3900921 | 2021-09-02      |
| hCoV-19/Japan/PG-90317/2021 | EPI_ISL_3900922 | 2021-09-02      |
| hCoV-19/Japan/PG-90318/2021 | EPI_ISL_3900923 | 2021-09-02      |
| hCoV-19/Japan/PG-90319/2021 | EPI_ISL_3900924 | 2021-09-02      |
| hCoV-19/Japan/PG-90320/2021 | EPI_ISL_3900925 | 2021-09-02      |
| hCoV-19/Japan/PG-90321/2021 | EPI_ISL_3900926 | 2021-09-02      |
| hCoV-19/Japan/PG-90322/2021 | EPI_ISL_3900927 | 2021-09-02      |
| hCoV-19/Japan/PG-90323/2021 | EPI_ISL_3900928 | 2021-09-02      |
| hCoV-19/Japan/PG-90324/2021 | EPI_ISL_3900929 | 2021-09-02      |
| hCoV-19/Japan/PG-90325/2021 | EPI_ISL_3900930 | 2021-09-02      |
| hCoV-19/Japan/PG-90326/2021 | EPI_ISL_3900931 | 2021-09-02      |
| hCoV-19/Japan/PG-90327/2021 | EPI_ISL_3900932 | 2021-09-02      |
| hCoV-19/Japan/PG-90328/2021 | EPI_ISL_3900933 | 2021-09-02      |
| hCoV-19/Japan/PG-90329/2021 | EPI_ISL_3900934 | 2021-09-02      |
| hCoV-19/Japan/PG-90330/2021 | EPI_ISL_3900935 | 2021-09-02      |
| hCoV-19/Japan/PG-90331/2021 | EPI_ISL_3900936 | 2021-09-02      |
| hCoV-19/Japan/PG-90332/2021 | EPI_ISL_3900937 | 2021-09-02      |
| hCoV-19/Japan/PG-90333/2021 | EPI_ISL_3900938 | 2021-09-02      |
| hCoV-19/Japan/PG-90334/2021 | EPI_ISL_3900939 | 2021-09-02      |
| hCoV-19/Japan/PG-90335/2021 | EPI_ISL_3900940 | 2021-09-02      |
| hCoV-19/Japan/PG-90336/2021 | EPI_ISL_3900941 | 2021-09-02      |
| hCoV-19/Japan/PG-90337/2021 | EPI_ISL_3900942 | 2021-09-02      |
| hCoV-19/Japan/PG-90338/2021 | EPI_ISL_3900943 | 2021-09-02      |
| hCoV-19/Japan/PG-90339/2021 | EPI_ISL_3900944 | 2021-09-02      |
| hCoV-19/Japan/PG-90340/2021 | EPI_ISL_3900945 | 2021-09-02      |
| hCoV-19/Japan/PG-90341/2021 | EPI_ISL_3900946 | 2021-09-02      |
| hCoV-19/Japan/PG-90342/2021 | EPI_ISL_3900947 | 2021-09-02      |



| virus_name                  | epiID           | submission_date |
|-----------------------------|-----------------|-----------------|
| hCoV-19/Japan/PG-90343/2021 | EPI_ISL_3900948 | 2021-09-02      |
| hCoV-19/Japan/PG-90344/2021 | EPI_ISL_3900949 | 2021-09-02      |
| hCoV-19/Japan/PG-90345/2021 | EPI_ISL_3900950 | 2021-09-02      |
| hCoV-19/Japan/PG-90346/2021 | EPI_ISL_3900951 | 2021-09-02      |
| hCoV-19/Japan/PG-90347/2021 | EPI_ISL_3900952 | 2021-09-02      |
| hCoV-19/Japan/PG-90348/2021 | EPI_ISL_3900953 | 2021-09-02      |
| hCoV-19/Japan/PG-90349/2021 | EPI_ISL_3900954 | 2021-09-02      |
| hCoV-19/Japan/PG-90350/2021 | EPI_ISL_3900955 | 2021-09-02      |
| hCoV-19/Japan/PG-90351/2021 | EPI_ISL_3900956 | 2021-09-02      |
| hCoV-19/Japan/PG-90352/2021 | EPI_ISL_3900957 | 2021-09-02      |
| hCoV-19/Japan/PG-90353/2021 | EPI_ISL_3900958 | 2021-09-02      |
| hCoV-19/Japan/PG-90354/2021 | EPI_ISL_3900959 | 2021-09-02      |
| hCoV-19/Japan/PG-90355/2021 | EPI_ISL_3900960 | 2021-09-02      |
| hCoV-19/Japan/PG-90356/2021 | EPI_ISL_3900961 | 2021-09-02      |
| hCoV-19/Japan/PG-90357/2021 | EPI_ISL_3900962 | 2021-09-02      |
| hCoV-19/Japan/PG-90358/2021 | EPI_ISL_3900963 | 2021-09-02      |
| hCoV-19/Japan/PG-90359/2021 | EPI_ISL_3900964 | 2021-09-02      |
| hCoV-19/Japan/PG-90360/2021 | EPI_ISL_3900965 | 2021-09-02      |
| hCoV-19/Japan/PG-90361/2021 | EPI_ISL_3900966 | 2021-09-02      |
| hCoV-19/Japan/PG-90362/2021 | EPI_ISL_3900967 | 2021-09-02      |
| hCoV-19/Japan/PG-90363/2021 | EPI_ISL_3900968 | 2021-09-02      |
| hCoV-19/Japan/PG-90364/2021 | EPI_ISL_3900969 | 2021-09-02      |
| hCoV-19/Japan/PG-90365/2021 | EPI_ISL_3900970 | 2021-09-02      |
| hCoV-19/Japan/PG-90366/2021 | EPI_ISL_3900971 | 2021-09-02      |
| hCoV-19/Japan/PG-90367/2021 | EPI_ISL_3900972 | 2021-09-02      |
| hCoV-19/Japan/PG-90368/2021 | EPI_ISL_3900973 | 2021-09-02      |
| hCoV-19/Japan/PG-90369/2021 | EPI_ISL_3900974 | 2021-09-02      |
| hCoV-19/Japan/PG-90370/2021 | EPI_ISL_3900975 | 2021-09-02      |
| hCoV-19/Japan/PG-90371/2021 | EPI_ISL_3900976 | 2021-09-02      |
| hCoV-19/Japan/PG-90372/2021 | EPI_ISL_3900977 | 2021-09-02      |
| hCoV-19/Japan/PG-90373/2021 | EPI_ISL_3900978 | 2021-09-02      |
| hCoV-19/Japan/PG-90374/2021 | EPI_ISL_3900979 | 2021-09-02      |
| hCoV-19/Japan/PG-90375/2021 | EPI_ISL_3900980 | 2021-09-02      |
| hCoV-19/Japan/PG-90376/2021 | EPI_ISL_3900981 | 2021-09-02      |
| hCoV-19/Japan/PG-90377/2021 | EPI_ISL_3900982 | 2021-09-02      |
| hCoV-19/Japan/PG-90378/2021 | EPI_ISL_3900983 | 2021-09-02      |
| hCoV-19/Japan/PG-90379/2021 | EPI_ISL_3900984 | 2021-09-02      |
| hCoV-19/Japan/PG-90380/2021 | EPI_ISL_3900985 | 2021-09-02      |
| hCoV-19/Japan/PG-90384/2021 | EPI_ISL_3900986 | 2021-09-02      |
| hCoV-19/Japan/PG-90385/2021 | EPI_ISL_3900987 | 2021-09-02      |
| hCoV-19/Japan/PG-90386/2021 | EPI_ISL_3900988 | 2021-09-02      |
| hCoV-19/Japan/PG-90387/2021 | EPI_ISL_3900989 | 2021-09-02      |
| hCoV-19/Japan/PG-90388/2021 | EPI_ISL_3900990 | 2021-09-02      |
| hCoV-19/Japan/PG-90389/2021 | EPI_ISL_3900991 | 2021-09-02      |
| hCoV-19/Japan/PG-90390/2021 | EPI_ISL_3900992 | 2021-09-02      |
| hCoV-19/Japan/PG-90391/2021 | EPI_ISL_3900993 | 2021-09-02      |
| hCoV-19/Japan/PG-90392/2021 | EPI_ISL_3900994 | 2021-09-02      |
| hCoV-19/Japan/PG-90393/2021 | EPI_ISL_3900995 | 2021-09-02      |
| hCoV-19/Japan/PG-90394/2021 | EPI_ISL_3900996 | 2021-09-02      |
| hCoV-19/Japan/PG-90395/2021 | EPI_ISL_3900997 | 2021-09-02      |
| hCoV-19/Japan/PG-90396/2021 | EPI_ISL_3900998 | 2021-09-02      |
| hCoV-19/Japan/PG-90397/2021 | EPI_ISL_3900999 | 2021-09-02      |
| hCoV-19/Japan/PG-90398/2021 | EPI_ISL_3901000 | 2021-09-02      |
| hCoV-19/Japan/PG-90399/2021 | EPI_ISL_3901001 | 2021-09-02      |

| virus_name                  | epiID           | submission_date |
|-----------------------------|-----------------|-----------------|
| hCoV-19/Japan/PG-90400/2021 | EPI_ISL_3901002 | 2021-09-02      |
| hCoV-19/Japan/PG-90401/2021 | EPI_ISL_3901003 | 2021-09-02      |
| hCoV-19/Japan/PG-90402/2021 | EPI_ISL_3901004 | 2021-09-02      |
| hCoV-19/Japan/PG-90406/2021 | EPI_ISL_3901005 | 2021-09-02      |
| hCoV-19/Japan/PG-90407/2021 | EPI_ISL_3901006 | 2021-09-02      |
| hCoV-19/Japan/PG-90408/2021 | EPI_ISL_3901007 | 2021-09-02      |
| hCoV-19/Japan/PG-90409/2021 | EPI_ISL_3901008 | 2021-09-02      |
| hCoV-19/Japan/PG-90410/2021 | EPI_ISL_3901009 | 2021-09-02      |
| hCoV-19/Japan/PG-90411/2021 | EPI_ISL_3901010 | 2021-09-02      |
| hCoV-19/Japan/PG-90412/2021 | EPI_ISL_3901011 | 2021-09-02      |
| hCoV-19/Japan/PG-90413/2021 | EPI_ISL_3901012 | 2021-09-02      |
| hCoV-19/Japan/PG-90419/2021 | EPI_ISL_3901013 | 2021-09-02      |
| hCoV-19/Japan/PG-90420/2021 | EPI_ISL_3901014 | 2021-09-02      |
| hCoV-19/Japan/PG-90421/2021 | EPI_ISL_3901015 | 2021-09-02      |
| hCoV-19/Japan/PG-90422/2021 | EPI_ISL_3901016 | 2021-09-02      |
| hCoV-19/Japan/PG-90423/2021 | EPI_ISL_3901017 | 2021-09-02      |
| hCoV-19/Japan/PG-90424/2021 | EPI_ISL_3901018 | 2021-09-02      |
| hCoV-19/Japan/PG-90425/2021 | EPI_ISL_3901019 | 2021-09-02      |
| hCoV-19/Japan/PG-90426/2021 | EPI_ISL_3901020 | 2021-09-02      |
| hCoV-19/Japan/PG-90427/2021 | EPI_ISL_3901021 | 2021-09-02      |
| hCoV-19/Japan/PG-90428/2021 | EPI_ISL_3901022 | 2021-09-02      |
| hCoV-19/Japan/PG-90429/2021 | EPI_ISL_3901023 | 2021-09-02      |
| hCoV-19/Japan/PG-90430/2021 | EPI_ISL_3901024 | 2021-09-02      |
| hCoV-19/Japan/PG-90431/2021 | EPI_ISL_3901025 | 2021-09-02      |
| hCoV-19/Japan/PG-90432/2021 | EPI_ISL_3901026 | 2021-09-02      |
| hCoV-19/Japan/PG-90433/2021 | EPI_ISL_3901027 | 2021-09-02      |
| hCoV-19/Japan/PG-90434/2021 | EPI_ISL_3901028 | 2021-09-02      |
| hCoV-19/Japan/PG-90435/2021 | EPI_ISL_3901029 | 2021-09-02      |
| hCoV-19/Japan/PG-90436/2021 | EPI_ISL_3901030 | 2021-09-02      |
| hCoV-19/Japan/PG-90437/2021 | EPI_ISL_3901031 | 2021-09-02      |
| hCoV-19/Japan/PG-90438/2021 | EPI_ISL_3901032 | 2021-09-02      |
| hCoV-19/Japan/PG-90441/2021 | EPI_ISL_3901033 | 2021-09-02      |
| hCoV-19/Japan/PG-90442/2021 | EPI_ISL_3901034 | 2021-09-02      |
| hCoV-19/Japan/PG-90443/2021 | EPI_ISL_3901035 | 2021-09-02      |
| hCoV-19/Japan/PG-90444/2021 | EPI_ISL_3901036 | 2021-09-02      |
| hCoV-19/Japan/PG-90445/2021 | EPI_ISL_3901037 | 2021-09-02      |
| hCoV-19/Japan/PG-90446/2021 | EPI_ISL_3901038 | 2021-09-02      |
| hCoV-19/Japan/PG-90447/2021 | EPI_ISL_3901039 | 2021-09-02      |
| hCoV-19/Japan/PG-90448/2021 | EPI_ISL_3901040 | 2021-09-02      |
| hCoV-19/Japan/PG-90449/2021 | EPI_ISL_3901041 | 2021-09-02      |
| hCoV-19/Japan/PG-90450/2021 | EPI_ISL_3901042 | 2021-09-02      |
| hCoV-19/Japan/PG-90451/2021 | EPI_ISL_3901043 | 2021-09-02      |
| hCoV-19/Japan/PG-90452/2021 | EPI_ISL_3901044 | 2021-09-02      |
| hCoV-19/Japan/PG-90453/2021 | EPI_ISL_3901045 | 2021-09-02      |
| hCoV-19/Japan/PG-90489/2021 | EPI_ISL_3901046 | 2021-09-02      |
| hCoV-19/Japan/PG-90490/2021 | EPI_ISL_3901047 | 2021-09-02      |
| hCoV-19/Japan/PG-90491/2021 | EPI_ISL_3901048 | 2021-09-02      |
| hCoV-19/Japan/PG-90492/2021 | EPI_ISL_3901049 | 2021-09-02      |
| hCoV-19/Japan/PG-90493/2021 | EPI_ISL_3901050 | 2021-09-02      |
| hCoV-19/Japan/PG-90494/2021 | EPI_ISL_3901051 | 2021-09-02      |
| hCoV-19/Japan/PG-90495/2021 | EPI_ISL_3901052 | 2021-09-02      |
| hCoV-19/Japan/PG-90496/2021 | EPI_ISL_3901053 | 2021-09-02      |
| hCoV-19/Japan/PG-90497/2021 | EPI_ISL_3901054 | 2021-09-02      |
| hCoV-19/Japan/PG-90498/2021 | EPI_ISL_3901055 | 2021-09-02      |

| virus_name                  | epiID           | submission_date |
|-----------------------------|-----------------|-----------------|
| hCoV-19/Japan/PG-90499/2021 | EPI_ISL_3901056 | 2021-09-02      |
| hCoV-19/Japan/PG-90500/2021 | EPI_ISL_3901057 | 2021-09-02      |
| hCoV-19/Japan/PG-90501/2021 | EPI_ISL_3901058 | 2021-09-02      |
| hCoV-19/Japan/PG-90502/2021 | EPI_ISL_3901059 | 2021-09-02      |
| hCoV-19/Japan/PG-90503/2021 | EPI_ISL_3901060 | 2021-09-02      |
| hCoV-19/Japan/PG-90504/2021 | EPI_ISL_3901061 | 2021-09-02      |
| hCoV-19/Japan/PG-90505/2021 | EPI_ISL_3901062 | 2021-09-02      |
| hCoV-19/Japan/PG-90506/2021 | EPI_ISL_3901063 | 2021-09-02      |
| hCoV-19/Japan/PG-90507/2021 | EPI_ISL_3901064 | 2021-09-02      |
| hCoV-19/Japan/PG-90508/2021 | EPI_ISL_3901065 | 2021-09-02      |
| hCoV-19/Japan/PG-90509/2021 | EPI_ISL_3901066 | 2021-09-02      |
| hCoV-19/Japan/PG-90510/2021 | EPI_ISL_3901067 | 2021-09-02      |
| hCoV-19/Japan/PG-90511/2021 | EPI_ISL_3901068 | 2021-09-02      |
| hCoV-19/Japan/PG-90512/2021 | EPI_ISL_3901069 | 2021-09-02      |
| hCoV-19/Japan/PG-90513/2021 | EPI_ISL_3901070 | 2021-09-02      |
| hCoV-19/Japan/PG-90514/2021 | EPI_ISL_3901071 | 2021-09-02      |
| hCoV-19/Japan/PG-90515/2021 | EPI_ISL_3901072 | 2021-09-02      |
| hCoV-19/Japan/PG-90516/2021 | EPI_ISL_3901073 | 2021-09-02      |
| hCoV-19/Japan/PG-90517/2021 | EPI_ISL_3901074 | 2021-09-02      |
| hCoV-19/Japan/PG-90518/2021 | EPI_ISL_3901075 | 2021-09-02      |
| hCoV-19/Japan/PG-90519/2021 | EPI_ISL_3901076 | 2021-09-02      |
| hCoV-19/Japan/PG-90520/2021 | EPI_ISL_3901077 | 2021-09-02      |
| hCoV-19/Japan/PG-90521/2021 | EPI_ISL_3901078 | 2021-09-02      |
| hCoV-19/Japan/PG-90522/2021 | EPI_ISL_3901079 | 2021-09-02      |
| hCoV-19/Japan/PG-90523/2021 | EPI_ISL_3901080 | 2021-09-02      |
| hCoV-19/Japan/PG-90524/2021 | EPI_ISL_3901081 | 2021-09-02      |
| hCoV-19/Japan/PG-90525/2021 | EPI_ISL_3901082 | 2021-09-02      |
| hCoV-19/Japan/PG-90526/2021 | EPI_ISL_3901083 | 2021-09-02      |
| hCoV-19/Japan/PG-90527/2021 | EPI_ISL_3901084 | 2021-09-02      |
| hCoV-19/Japan/PG-90528/2021 | EPI_ISL_3901085 | 2021-09-02      |
| hCoV-19/Japan/PG-90529/2021 | EPI_ISL_3901086 | 2021-09-02      |
| hCoV-19/Japan/PG-90530/2021 | EPI_ISL_3901087 | 2021-09-02      |
| hCoV-19/Japan/PG-90531/2021 | EPI_ISL_3901088 | 2021-09-02      |
| hCoV-19/Japan/PG-90532/2021 | EPI_ISL_3901089 | 2021-09-02      |
| hCoV-19/Japan/PG-90533/2021 | EPI_ISL_3901090 | 2021-09-02      |
| hCoV-19/Japan/PG-90534/2021 | EPI_ISL_3901091 | 2021-09-02      |
| hCoV-19/Japan/PG-90535/2021 | EPI_ISL_3901092 | 2021-09-02      |
| hCoV-19/Japan/PG-90536/2021 | EPI_ISL_3901093 | 2021-09-02      |
| hCoV-19/Japan/PG-90537/2021 | EPI_ISL_3901094 | 2021-09-02      |
| hCoV-19/Japan/PG-90538/2021 | EPI_ISL_3901095 | 2021-09-02      |
| hCoV-19/Japan/PG-90539/2021 | EPI_ISL_3901096 | 2021-09-02      |
| hCoV-19/Japan/PG-90540/2021 | EPI_ISL_3901097 | 2021-09-02      |
| hCoV-19/Japan/PG-90541/2021 | EPI_ISL_3901098 | 2021-09-02      |
| hCoV-19/Japan/PG-90542/2021 | EPI_ISL_3901099 | 2021-09-02      |
| hCoV-19/Japan/PG-90543/2021 | EPI_ISL_3901100 | 2021-09-02      |
| hCoV-19/Japan/PG-90544/2021 | EPI_ISL_3901101 | 2021-09-02      |
| hCoV-19/Japan/PG-90545/2021 | EPI_ISL_3901102 | 2021-09-02      |
| hCoV-19/Japan/PG-90546/2021 | EPI_ISL_3901103 | 2021-09-02      |
| hCoV-19/Japan/PG-90547/2021 | EPI_ISL_3901104 | 2021-09-02      |
| hCoV-19/Japan/PG-90548/2021 | EPI_ISL_3901105 | 2021-09-02      |
| hCoV-19/Japan/PG-90549/2021 | EPI_ISL_3901106 | 2021-09-02      |
| hCoV-19/Japan/PG-90550/2021 | EPI_ISL_3901107 | 2021-09-02      |
| hCoV-19/Japan/PG-90551/2021 | EPI_ISL_3901108 | 2021-09-02      |
| hCoV-19/Japan/PG-90552/2021 | EPI_ISL_3901109 | 2021-09-02      |

| virus_name                  | epiID           | submission_date |
|-----------------------------|-----------------|-----------------|
| hCoV-19/Japan/PG-90553/2021 | EPI_ISL_3901110 | 2021-09-02      |
| hCoV-19/Japan/PG-90554/2021 | EPI_ISL_3901111 | 2021-09-02      |
| hCoV-19/Japan/PG-90555/2021 | EPI_ISL_3901112 | 2021-09-02      |
| hCoV-19/Japan/PG-90556/2021 | EPI_ISL_3901113 | 2021-09-02      |
| hCoV-19/Japan/PG-90557/2021 | EPI_ISL_3901114 | 2021-09-02      |
| hCoV-19/Japan/PG-90558/2021 | EPI_ISL_3901115 | 2021-09-02      |
| hCoV-19/Japan/PG-90559/2021 | EPI_ISL_3901116 | 2021-09-02      |
| hCoV-19/Japan/PG-90560/2021 | EPI_ISL_3901117 | 2021-09-02      |
| hCoV-19/Japan/PG-90561/2021 | EPI_ISL_3901118 | 2021-09-02      |
| hCoV-19/Japan/PG-90562/2021 | EPI_ISL_3901119 | 2021-09-02      |
| hCoV-19/Japan/PG-90563/2021 | EPI_ISL_3901120 | 2021-09-02      |
| hCoV-19/Japan/PG-90564/2021 | EPI_ISL_3901121 | 2021-09-02      |
| hCoV-19/Japan/PG-90565/2021 | EPI_ISL_3901122 | 2021-09-02      |
| hCoV-19/Japan/PG-90566/2021 | EPI_ISL_3901123 | 2021-09-02      |
| hCoV-19/Japan/PG-90567/2021 | EPI_ISL_3901124 | 2021-09-02      |
| hCoV-19/Japan/PG-90568/2021 | EPI_ISL_3901125 | 2021-09-02      |
| hCoV-19/Japan/PG-90569/2021 | EPI_ISL_3901126 | 2021-09-02      |
| hCoV-19/Japan/PG-90570/2021 | EPI_ISL_3901127 | 2021-09-02      |
| hCoV-19/Japan/PG-90571/2021 | EPI_ISL_3901128 | 2021-09-02      |
| hCoV-19/Japan/PG-90572/2021 | EPI_ISL_3901129 | 2021-09-02      |
| hCoV-19/Japan/PG-90573/2021 | EPI_ISL_3901130 | 2021-09-02      |
| hCoV-19/Japan/PG-90574/2021 | EPI_ISL_3901131 | 2021-09-02      |
| hCoV-19/Japan/PG-90575/2021 | EPI_ISL_3901132 | 2021-09-02      |
| hCoV-19/Japan/PG-90576/2021 | EPI_ISL_3901133 | 2021-09-02      |
| hCoV-19/Japan/PG-90577/2021 | EPI_ISL_3901134 | 2021-09-02      |
| hCoV-19/Japan/PG-90578/2021 | EPI_ISL_3901135 | 2021-09-02      |
| hCoV-19/Japan/PG-90579/2021 | EPI_ISL_3901136 | 2021-09-02      |
| hCoV-19/Japan/PG-90580/2021 | EPI_ISL_3901137 | 2021-09-02      |
| hCoV-19/Japan/PG-90581/2021 | EPI_ISL_3901138 | 2021-09-02      |
| hCoV-19/Japan/PG-90582/2021 | EPI_ISL_3901139 | 2021-09-02      |
| hCoV-19/Japan/PG-90583/2021 | EPI_ISL_3901140 | 2021-09-02      |
| hCoV-19/Japan/PG-90584/2021 | EPI_ISL_3901141 | 2021-09-02      |
| hCoV-19/Japan/PG-90585/2021 | EPI_ISL_3901142 | 2021-09-02      |
| hCoV-19/Japan/PG-90586/2021 | EPI_ISL_3901143 | 2021-09-02      |
| hCoV-19/Japan/PG-90587/2021 | EPI_ISL_3901144 | 2021-09-02      |
| hCoV-19/Japan/PG-90588/2021 | EPI_ISL_3901145 | 2021-09-02      |
| hCoV-19/Japan/PG-90589/2021 | EPI_ISL_3901146 | 2021-09-02      |
| hCoV-19/Japan/PG-90590/2021 | EPI_ISL_3901147 | 2021-09-02      |
| hCoV-19/Japan/PG-90591/2021 | EPI_ISL_3901148 | 2021-09-02      |
| hCoV-19/Japan/PG-90592/2021 | EPI_ISL_3901149 | 2021-09-02      |
| hCoV-19/Japan/PG-90593/2021 | EPI_ISL_3901150 | 2021-09-02      |
| hCoV-19/Japan/PG-90594/2021 | EPI_ISL_3901151 | 2021-09-02      |
| hCoV-19/Japan/PG-90595/2021 | EPI_ISL_3901152 | 2021-09-02      |
| hCoV-19/Japan/PG-90596/2021 | EPI_ISL_3901153 | 2021-09-02      |
| hCoV-19/Japan/PG-90597/2021 | EPI_ISL_3901154 | 2021-09-02      |
| hCoV-19/Japan/PG-90598/2021 | EPI_ISL_3901155 | 2021-09-02      |
| hCoV-19/Japan/PG-90599/2021 | EPI_ISL_3901156 | 2021-09-02      |
| hCoV-19/Japan/PG-90600/2021 | EPI_ISL_3901157 | 2021-09-02      |
| hCoV-19/Japan/PG-90601/2021 | EPI_ISL_3901158 | 2021-09-02      |
| hCoV-19/Japan/PG-90602/2021 | EPI_ISL_3901159 | 2021-09-02      |
| hCoV-19/Japan/PG-90603/2021 | EPI_ISL_3901160 | 2021-09-02      |
| hCoV-19/Japan/PG-90604/2021 | EPI_ISL_3901161 | 2021-09-02      |
| hCoV-19/Japan/PG-90605/2021 | EPI_ISL_3901162 | 2021-09-02      |
| hCoV-19/Japan/PG-90606/2021 | EPI_ISL_3901163 | 2021-09-02      |

| virus_name                  | epiID           | submission_date |
|-----------------------------|-----------------|-----------------|
| hCoV-19/Japan/PG-90607/2021 | EPI_ISL_3901164 | 2021-09-02      |
| hCoV-19/Japan/PG-90608/2021 | EPI_ISL_3901165 | 2021-09-02      |
| hCoV-19/Japan/PG-90609/2021 | EPI_ISL_3901166 | 2021-09-02      |
| hCoV-19/Japan/PG-90610/2021 | EPI_ISL_3901167 | 2021-09-02      |
| hCoV-19/Japan/PG-90611/2021 | EPI_ISL_3901168 | 2021-09-02      |
| hCoV-19/Japan/PG-90612/2021 | EPI_ISL_3901169 | 2021-09-02      |
| hCoV-19/Japan/PG-90613/2021 | EPI_ISL_3901170 | 2021-09-02      |
| hCoV-19/Japan/PG-90614/2021 | EPI_ISL_3901171 | 2021-09-02      |
| hCoV-19/Japan/PG-90615/2021 | EPI_ISL_3901172 | 2021-09-02      |
| hCoV-19/Japan/PG-90616/2021 | EPI_ISL_3901173 | 2021-09-02      |
| hCoV-19/Japan/PG-90617/2021 | EPI_ISL_3901174 | 2021-09-02      |
| hCoV-19/Japan/PG-90618/2021 | EPI_ISL_3901175 | 2021-09-02      |
| hCoV-19/Japan/PG-90619/2021 | EPI_ISL_3901176 | 2021-09-02      |
| hCoV-19/Japan/PG-90620/2021 | EPI_ISL_3901177 | 2021-09-02      |
| hCoV-19/Japan/PG-90621/2021 | EPI_ISL_3901178 | 2021-09-02      |
| hCoV-19/Japan/PG-90622/2021 | EPI_ISL_3901179 | 2021-09-02      |
| hCoV-19/Japan/PG-90623/2021 | EPI_ISL_3901180 | 2021-09-02      |
| hCoV-19/Japan/PG-90624/2021 | EPI_ISL_3901181 | 2021-09-02      |
| hCoV-19/Japan/PG-90625/2021 | EPI_ISL_3901182 | 2021-09-02      |
| hCoV-19/Japan/PG-90626/2021 | EPI_ISL_3901183 | 2021-09-02      |
| hCoV-19/Japan/PG-90627/2021 | EPI_ISL_3901184 | 2021-09-02      |
| hCoV-19/Japan/PG-90628/2021 | EPI_ISL_3901185 | 2021-09-02      |
| hCoV-19/Japan/PG-90629/2021 | EPI_ISL_3901186 | 2021-09-02      |
| hCoV-19/Japan/PG-90630/2021 | EPI_ISL_3901187 | 2021-09-02      |
| hCoV-19/Japan/PG-90631/2021 | EPI_ISL_3901188 | 2021-09-02      |
| hCoV-19/Japan/PG-90632/2021 | EPI_ISL_3901189 | 2021-09-02      |
| hCoV-19/Japan/PG-90633/2021 | EPI_ISL_3901190 | 2021-09-02      |
| hCoV-19/Japan/PG-90634/2021 | EPI_ISL_3901191 | 2021-09-02      |
| hCoV-19/Japan/PG-90635/2021 | EPI_ISL_3901192 | 2021-09-02      |
| hCoV-19/Japan/PG-90636/2021 | EPI_ISL_3901193 | 2021-09-02      |
| hCoV-19/Japan/PG-90637/2021 | EPI_ISL_3901194 | 2021-09-02      |
| hCoV-19/Japan/PG-90638/2021 | EPI_ISL_3901195 | 2021-09-02      |
| hCoV-19/Japan/PG-90639/2021 | EPI_ISL_3901196 | 2021-09-02      |
| hCoV-19/Japan/PG-90640/2021 | EPI_ISL_3901197 | 2021-09-02      |
| hCoV-19/Japan/PG-90641/2021 | EPI_ISL_3901198 | 2021-09-02      |
| hCoV-19/Japan/PG-90642/2021 | EPI_ISL_3901199 | 2021-09-02      |
| hCoV-19/Japan/PG-90643/2021 | EPI_ISL_3901200 | 2021-09-02      |
| hCoV-19/Japan/PG-90644/2021 | EPI_ISL_3901201 | 2021-09-02      |
| hCoV-19/Japan/PG-90645/2021 | EPI_ISL_3901202 | 2021-09-02      |
| hCoV-19/Japan/PG-90646/2021 | EPI_ISL_3901203 | 2021-09-02      |
| hCoV-19/Japan/PG-90647/2021 | EPI_ISL_3901204 | 2021-09-02      |
| hCoV-19/Japan/PG-90648/2021 | EPI_ISL_3901205 | 2021-09-02      |
| hCoV-19/Japan/PG-90649/2021 | EPI_ISL_3901206 | 2021-09-02      |
| hCoV-19/Japan/PG-90650/2021 | EPI_ISL_3901207 | 2021-09-02      |
| hCoV-19/Japan/PG-90651/2021 | EPI_ISL_3901208 | 2021-09-02      |
| hCoV-19/Japan/PG-90652/2021 | EPI_ISL_3901209 | 2021-09-02      |
| hCoV-19/Japan/PG-90653/2021 | EPI_ISL_3901210 | 2021-09-02      |
| hCoV-19/Japan/PG-90654/2021 | EPI_ISL_3901211 | 2021-09-02      |
| hCoV-19/Japan/PG-90655/2021 | EPI_ISL_3901212 | 2021-09-02      |
| hCoV-19/Japan/PG-90656/2021 | EPI_ISL_3901213 | 2021-09-02      |
| hCoV-19/Japan/PG-90657/2021 | EPI_ISL_3901214 | 2021-09-02      |
| hCoV-19/Japan/PG-90658/2021 | EPI_ISL_3901215 | 2021-09-02      |
| hCoV-19/Japan/PG-90659/2021 | EPI_ISL_3901216 | 2021-09-02      |
| hCoV-19/Japan/PG-90660/2021 | EPI_ISL_3901217 | 2021-09-02      |

| virus_name                  | epiID           | submission_date |
|-----------------------------|-----------------|-----------------|
| hCoV-19/Japan/PG-90661/2021 | EPI_ISL_3901218 | 2021-09-02      |
| hCoV-19/Japan/PG-90662/2021 | EPI_ISL_3901219 | 2021-09-02      |
| hCoV-19/Japan/PG-90663/2021 | EPI_ISL_3901220 | 2021-09-02      |
| hCoV-19/Japan/PG-90664/2021 | EPI_ISL_3901221 | 2021-09-02      |
| hCoV-19/Japan/PG-90665/2021 | EPI_ISL_3901222 | 2021-09-02      |
| hCoV-19/Japan/PG-90666/2021 | EPI_ISL_3901223 | 2021-09-02      |
| hCoV-19/Japan/PG-90667/2021 | EPI_ISL_3901224 | 2021-09-02      |
| hCoV-19/Japan/PG-90668/2021 | EPI_ISL_3901225 | 2021-09-02      |
| hCoV-19/Japan/PG-90669/2021 | EPI_ISL_3901226 | 2021-09-02      |
| hCoV-19/Japan/PG-90670/2021 | EPI_ISL_3901227 | 2021-09-02      |
| hCoV-19/Japan/PG-90671/2021 | EPI_ISL_3901228 | 2021-09-02      |
| hCoV-19/Japan/PG-90672/2021 | EPI_ISL_3901229 | 2021-09-02      |
| hCoV-19/Japan/PG-90673/2021 | EPI_ISL_3901230 | 2021-09-02      |
| hCoV-19/Japan/PG-90674/2021 | EPI_ISL_3901231 | 2021-09-02      |
| hCoV-19/Japan/PG-90675/2021 | EPI_ISL_3901232 | 2021-09-02      |
| hCoV-19/Japan/PG-90676/2021 | EPI_ISL_3901233 | 2021-09-02      |
| hCoV-19/Japan/PG-90677/2021 | EPI_ISL_3901234 | 2021-09-02      |
| hCoV-19/Japan/PG-90678/2021 | EPI_ISL_3901235 | 2021-09-02      |
| hCoV-19/Japan/PG-90679/2021 | EPI_ISL_3901236 | 2021-09-02      |
| hCoV-19/Japan/PG-90680/2021 | EPI_ISL_3901237 | 2021-09-02      |
| hCoV-19/Japan/PG-90681/2021 | EPI_ISL_3901238 | 2021-09-02      |
| hCoV-19/Japan/PG-90682/2021 | EPI_ISL_3901239 | 2021-09-02      |
| hCoV-19/Japan/PG-90683/2021 | EPI_ISL_3901240 | 2021-09-02      |
| hCoV-19/Japan/PG-90684/2021 | EPI_ISL_3901241 | 2021-09-02      |
| hCoV-19/Japan/PG-90685/2021 | EPI_ISL_3901242 | 2021-09-02      |
| hCoV-19/Japan/PG-90686/2021 | EPI_ISL_3901243 | 2021-09-02      |
| hCoV-19/Japan/PG-90687/2021 | EPI_ISL_3901244 | 2021-09-02      |
| hCoV-19/Japan/PG-90688/2021 | EPI_ISL_3901245 | 2021-09-02      |
| hCoV-19/Japan/PG-90689/2021 | EPI_ISL_3901246 | 2021-09-02      |
| hCoV-19/Japan/PG-90690/2021 | EPI_ISL_3901247 | 2021-09-02      |
| hCoV-19/Japan/PG-90691/2021 | EPI_ISL_3901248 | 2021-09-02      |
| hCoV-19/Japan/PG-90692/2021 | EPI_ISL_3901249 | 2021-09-02      |
| hCoV-19/Japan/PG-90693/2021 | EPI_ISL_3901250 | 2021-09-02      |
| hCoV-19/Japan/PG-90694/2021 | EPI_ISL_3901251 | 2021-09-02      |
| hCoV-19/Japan/PG-90695/2021 | EPI_ISL_3901252 | 2021-09-02      |
| hCoV-19/Japan/PG-90696/2021 | EPI_ISL_3901253 | 2021-09-02      |
| hCoV-19/Japan/PG-90697/2021 | EPI_ISL_3901254 | 2021-09-02      |
| hCoV-19/Japan/PG-90698/2021 | EPI_ISL_3901255 | 2021-09-02      |
| hCoV-19/Japan/PG-90699/2021 | EPI_ISL_3901256 | 2021-09-02      |
| hCoV-19/Japan/PG-90700/2021 | EPI_ISL_3901257 | 2021-09-02      |
| hCoV-19/Japan/PG-90701/2021 | EPI_ISL_3901258 | 2021-09-02      |
| hCoV-19/Japan/PG-90702/2021 | EPI_ISL_3901259 | 2021-09-02      |
| hCoV-19/Japan/PG-90703/2021 | EPI_ISL_3901260 | 2021-09-02      |
| hCoV-19/Japan/PG-90704/2021 | EPI_ISL_3901261 | 2021-09-02      |
| hCoV-19/Japan/PG-90705/2021 | EPI_ISL_3901262 | 2021-09-02      |
| hCoV-19/Japan/PG-90706/2021 | EPI_ISL_3901263 | 2021-09-02      |
| hCoV-19/Japan/PG-90707/2021 | EPI_ISL_3901264 | 2021-09-02      |
| hCoV-19/Japan/PG-90708/2021 | EPI_ISL_3901265 | 2021-09-02      |
| hCoV-19/Japan/PG-90709/2021 | EPI_ISL_3901266 | 2021-09-02      |
| hCoV-19/Japan/PG-90710/2021 | EPI_ISL_3901267 | 2021-09-02      |
| hCoV-19/Japan/PG-90711/2021 | EPI_ISL_3901268 | 2021-09-02      |
| hCoV-19/Japan/PG-90712/2021 | EPI_ISL_3901269 | 2021-09-02      |
| hCoV-19/Japan/PG-90713/2021 | EPI_ISL_3901270 | 2021-09-02      |
| hCoV-19/Japan/PG-90714/2021 | EPI_ISL_3901271 | 2021-09-02      |

| virus_name                  | epiID           | submission_date |
|-----------------------------|-----------------|-----------------|
| hCoV-19/Japan/PG-90715/2021 | EPI_ISL_3901272 | 2021-09-02      |
| hCoV-19/Japan/PG-90716/2021 | EPI_ISL_3901273 | 2021-09-02      |
| hCoV-19/Japan/PG-90717/2021 | EPI_ISL_3901274 | 2021-09-02      |
| hCoV-19/Japan/PG-90718/2021 | EPI_ISL_3901275 | 2021-09-02      |
| hCoV-19/Japan/PG-90719/2021 | EPI_ISL_3901276 | 2021-09-02      |
| hCoV-19/Japan/PG-90720/2021 | EPI_ISL_3901277 | 2021-09-02      |
| hCoV-19/Japan/PG-90721/2021 | EPI_ISL_3901278 | 2021-09-02      |
| hCoV-19/Japan/PG-90722/2021 | EPI_ISL_3901279 | 2021-09-02      |
| hCoV-19/Japan/PG-90723/2021 | EPI_ISL_3901280 | 2021-09-02      |
| hCoV-19/Japan/PG-90724/2021 | EPI_ISL_3901281 | 2021-09-02      |
| hCoV-19/Japan/PG-90725/2021 | EPI_ISL_3901282 | 2021-09-02      |
| hCoV-19/Japan/PG-90726/2021 | EPI_ISL_3901283 | 2021-09-02      |
| hCoV-19/Japan/PG-90727/2021 | EPI_ISL_3901284 | 2021-09-02      |
| hCoV-19/Japan/PG-90728/2021 | EPI_ISL_3901285 | 2021-09-02      |
| hCoV-19/Japan/PG-90729/2021 | EPI_ISL_3901286 | 2021-09-02      |
| hCoV-19/Japan/PG-90730/2021 | EPI_ISL_3901287 | 2021-09-02      |
| hCoV-19/Japan/PG-90731/2021 | EPI_ISL_3901288 | 2021-09-02      |
| hCoV-19/Japan/PG-90732/2021 | EPI_ISL_3901289 | 2021-09-02      |
| hCoV-19/Japan/PG-90733/2021 | EPI_ISL_3901290 | 2021-09-02      |
| hCoV-19/Japan/PG-90734/2021 | EPI_ISL_3901291 | 2021-09-02      |
| hCoV-19/Japan/PG-90735/2021 | EPI_ISL_3901292 | 2021-09-02      |
| hCoV-19/Japan/PG-90736/2021 | EPI_ISL_3901293 | 2021-09-02      |
| hCoV-19/Japan/PG-90737/2021 | EPI_ISL_3901294 | 2021-09-02      |
| hCoV-19/Japan/PG-90738/2021 | EPI_ISL_3901295 | 2021-09-02      |
| hCoV-19/Japan/PG-90739/2021 | EPI_ISL_3901296 | 2021-09-02      |
| hCoV-19/Japan/PG-90740/2021 | EPI_ISL_3901297 | 2021-09-02      |
| hCoV-19/Japan/PG-90741/2021 | EPI_ISL_3901298 | 2021-09-02      |
| hCoV-19/Japan/PG-90742/2021 | EPI_ISL_3901299 | 2021-09-02      |
| hCoV-19/Japan/PG-90743/2021 | EPI_ISL_3901300 | 2021-09-02      |
| hCoV-19/Japan/PG-90744/2021 | EPI_ISL_3901301 | 2021-09-02      |
| hCoV-19/Japan/PG-90745/2021 | EPI_ISL_3901302 | 2021-09-02      |
| hCoV-19/Japan/PG-90746/2021 | EPI_ISL_3901303 | 2021-09-02      |
| hCoV-19/Japan/PG-90747/2021 | EPI_ISL_3901304 | 2021-09-02      |
| hCoV-19/Japan/PG-90748/2021 | EPI_ISL_3901305 | 2021-09-02      |
| hCoV-19/Japan/PG-90749/2021 | EPI_ISL_3901306 | 2021-09-02      |
| hCoV-19/Japan/PG-90750/2021 | EPI_ISL_3901307 | 2021-09-02      |
| hCoV-19/Japan/PG-90751/2021 | EPI_ISL_3901308 | 2021-09-02      |
| hCoV-19/Japan/PG-90752/2021 | EPI_ISL_3901309 | 2021-09-02      |
| hCoV-19/Japan/PG-90753/2021 | EPI_ISL_3901310 | 2021-09-02      |
| hCoV-19/Japan/PG-90754/2021 | EPI_ISL_3901311 | 2021-09-02      |
| hCoV-19/Japan/PG-90755/2021 | EPI_ISL_3901312 | 2021-09-02      |
| hCoV-19/Japan/PG-90756/2021 | EPI_ISL_3901313 | 2021-09-02      |
| hCoV-19/Japan/PG-90757/2021 | EPI_ISL_3901314 | 2021-09-02      |
| hCoV-19/Japan/PG-90758/2021 | EPI_ISL_3901315 | 2021-09-02      |
| hCoV-19/Japan/PG-90759/2021 | EPI_ISL_3901316 | 2021-09-02      |
| hCoV-19/Japan/PG-90760/2021 | EPI_ISL_3901317 | 2021-09-02      |
| hCoV-19/Japan/PG-90761/2021 | EPI_ISL_3901318 | 2021-09-02      |
| hCoV-19/Japan/PG-90762/2021 | EPI_ISL_3901319 | 2021-09-02      |
| hCoV-19/Japan/PG-90763/2021 | EPI_ISL_3901320 | 2021-09-02      |
| hCoV-19/Japan/PG-90764/2021 | EPI_ISL_3901321 | 2021-09-02      |
| hCoV-19/Japan/PG-90765/2021 | EPI_ISL_3901322 | 2021-09-02      |
| hCoV-19/Japan/PG-90766/2021 | EPI_ISL_3901323 | 2021-09-02      |
| hCoV-19/Japan/PG-90767/2021 | EPI_ISL_3901324 | 2021-09-02      |
| hCoV-19/Japan/PG-90768/2021 | EPI_ISL_3901325 | 2021-09-02      |

| virus_name                  | epiID           | submission_date |
|-----------------------------|-----------------|-----------------|
| hCoV-19/Japan/PG-90769/2021 | EPI_ISL_3901326 | 2021-09-02      |
| hCoV-19/Japan/PG-90770/2021 | EPI_ISL_3901327 | 2021-09-02      |
| hCoV-19/Japan/PG-90771/2021 | EPI_ISL_3901328 | 2021-09-02      |
| hCoV-19/Japan/PG-90772/2021 | EPI_ISL_3901329 | 2021-09-02      |
| hCoV-19/Japan/PG-90773/2021 | EPI_ISL_3901330 | 2021-09-02      |
| hCoV-19/Japan/PG-90774/2021 | EPI_ISL_3901331 | 2021-09-02      |
| hCoV-19/Japan/PG-90775/2021 | EPI_ISL_3901332 | 2021-09-02      |
| hCoV-19/Japan/PG-90776/2021 | EPI_ISL_3901333 | 2021-09-02      |
| hCoV-19/Japan/PG-90777/2021 | EPI_ISL_3901334 | 2021-09-02      |
| hCoV-19/Japan/PG-90778/2021 | EPI_ISL_3901335 | 2021-09-02      |
| hCoV-19/Japan/PG-90779/2021 | EPI_ISL_3901336 | 2021-09-02      |
| hCoV-19/Japan/PG-90780/2021 | EPI_ISL_3901337 | 2021-09-02      |
| hCoV-19/Japan/PG-90781/2021 | EPI_ISL_3901338 | 2021-09-02      |
| hCoV-19/Japan/PG-90782/2021 | EPI_ISL_3901339 | 2021-09-02      |
| hCoV-19/Japan/PG-90783/2021 | EPI_ISL_3901340 | 2021-09-02      |
| hCoV-19/Japan/PG-90784/2021 | EPI_ISL_3901341 | 2021-09-02      |
| hCoV-19/Japan/PG-90785/2021 | EPI_ISL_3901342 | 2021-09-02      |
| hCoV-19/Japan/PG-90786/2021 | EPI_ISL_3901343 | 2021-09-02      |
| hCoV-19/Japan/PG-90787/2021 | EPI_ISL_3901344 | 2021-09-02      |
| hCoV-19/Japan/PG-90788/2021 | EPI_ISL_3901345 | 2021-09-02      |
| hCoV-19/Japan/PG-90789/2021 | EPI_ISL_3901346 | 2021-09-02      |
| hCoV-19/Japan/PG-90790/2021 | EPI_ISL_3901347 | 2021-09-02      |
| hCoV-19/Japan/PG-90791/2021 | EPI_ISL_3901348 | 2021-09-02      |
| hCoV-19/Japan/PG-90792/2021 | EPI_ISL_3901349 | 2021-09-02      |
| hCoV-19/Japan/PG-90793/2021 | EPI_ISL_3901350 | 2021-09-02      |
| hCoV-19/Japan/PG-90794/2021 | EPI_ISL_3901351 | 2021-09-02      |
| hCoV-19/Japan/PG-90795/2021 | EPI_ISL_3901352 | 2021-09-02      |
| hCoV-19/Japan/PG-90796/2021 | EPI_ISL_3901353 | 2021-09-02      |
| hCoV-19/Japan/PG-90797/2021 | EPI_ISL_3901354 | 2021-09-02      |
| hCoV-19/Japan/PG-90798/2021 | EPI_ISL_3901355 | 2021-09-02      |
| hCoV-19/Japan/PG-90799/2021 | EPI_ISL_3901356 | 2021-09-02      |
| hCoV-19/Japan/PG-90800/2021 | EPI_ISL_3901357 | 2021-09-02      |
| hCoV-19/Japan/PG-90801/2021 | EPI_ISL_3901358 | 2021-09-02      |
| hCoV-19/Japan/PG-90802/2021 | EPI_ISL_3901359 | 2021-09-02      |
| hCoV-19/Japan/PG-90803/2021 | EPI_ISL_3901360 | 2021-09-02      |
| hCoV-19/Japan/PG-90804/2021 | EPI_ISL_3901361 | 2021-09-02      |
| hCoV-19/Japan/PG-90805/2021 | EPI_ISL_3901362 | 2021-09-02      |
| hCoV-19/Japan/PG-90806/2021 | EPI_ISL_3901363 | 2021-09-02      |
| hCoV-19/Japan/PG-90807/2021 | EPI_ISL_3901364 | 2021-09-02      |
| hCoV-19/Japan/PG-90808/2021 | EPI_ISL_3901365 | 2021-09-02      |
| hCoV-19/Japan/PG-90809/2021 | EPI_ISL_3901366 | 2021-09-02      |
| hCoV-19/Japan/PG-90810/2021 | EPI_ISL_3901367 | 2021-09-02      |
| hCoV-19/Japan/PG-90811/2021 | EPI_ISL_3901368 | 2021-09-02      |
| hCoV-19/Japan/PG-90812/2021 | EPI_ISL_3901369 | 2021-09-02      |
| hCoV-19/Japan/PG-90813/2021 | EPI_ISL_3901370 | 2021-09-02      |
| hCoV-19/Japan/PG-90814/2021 | EPI_ISL_3901371 | 2021-09-02      |
| hCoV-19/Japan/PG-90815/2021 | EPI_ISL_3901372 | 2021-09-02      |
| hCoV-19/Japan/PG-90816/2021 | EPI_ISL_3901373 | 2021-09-02      |
| hCoV-19/Japan/PG-90817/2021 | EPI_ISL_3901374 | 2021-09-02      |
| hCoV-19/Japan/PG-90818/2021 | EPI_ISL_3901375 | 2021-09-02      |
| hCoV-19/Japan/PG-90819/2021 | EPI_ISL_3901376 | 2021-09-02      |
| hCoV-19/Japan/PG-90820/2021 | EPI_ISL_3901377 | 2021-09-02      |
| hCoV-19/Japan/PG-90821/2021 | EPI_ISL_3901378 | 2021-09-02      |
| hCoV-19/Japan/PG-90822/2021 | EPI_ISL_3901379 | 2021-09-02      |



| virus_name                  | epiID           | submission_date |
|-----------------------------|-----------------|-----------------|
| hCoV-19/Japan/PG-90823/2021 | EPI_ISL_3901380 | 2021-09-02      |
| hCoV-19/Japan/PG-90824/2021 | EPI_ISL_3901381 | 2021-09-02      |
| hCoV-19/Japan/PG-90825/2021 | EPI_ISL_3901382 | 2021-09-02      |
| hCoV-19/Japan/PG-90826/2021 | EPI_ISL_3901383 | 2021-09-02      |
| hCoV-19/Japan/PG-90827/2021 | EPI_ISL_3901384 | 2021-09-02      |
| hCoV-19/Japan/PG-90828/2021 | EPI_ISL_3901385 | 2021-09-02      |
| hCoV-19/Japan/PG-90829/2021 | EPI_ISL_3901386 | 2021-09-02      |
| hCoV-19/Japan/PG-90830/2021 | EPI_ISL_3901387 | 2021-09-02      |
| hCoV-19/Japan/PG-90831/2021 | EPI_ISL_3901388 | 2021-09-02      |
| hCoV-19/Japan/PG-90832/2021 | EPI_ISL_3901389 | 2021-09-02      |
| hCoV-19/Japan/PG-90833/2021 | EPI_ISL_3901390 | 2021-09-02      |
| hCoV-19/Japan/PG-90834/2021 | EPI_ISL_3901391 | 2021-09-02      |
| hCoV-19/Japan/PG-90835/2021 | EPI_ISL_3901392 | 2021-09-02      |
| hCoV-19/Japan/PG-90836/2021 | EPI_ISL_3901393 | 2021-09-02      |
| hCoV-19/Japan/PG-90837/2021 | EPI_ISL_3901394 | 2021-09-02      |
| hCoV-19/Japan/PG-90838/2021 | EPI_ISL_3901395 | 2021-09-02      |
| hCoV-19/Japan/PG-90839/2021 | EPI_ISL_3901396 | 2021-09-02      |
| hCoV-19/Japan/PG-90840/2021 | EPI_ISL_3901397 | 2021-09-02      |
| hCoV-19/Japan/PG-90841/2021 | EPI_ISL_3901398 | 2021-09-02      |
| hCoV-19/Japan/PG-90842/2021 | EPI_ISL_3901399 | 2021-09-02      |
| hCoV-19/Japan/PG-90843/2021 | EPI_ISL_3901400 | 2021-09-02      |
| hCoV-19/Japan/PG-90844/2021 | EPI_ISL_3901401 | 2021-09-02      |
| hCoV-19/Japan/PG-90845/2021 | EPI_ISL_3901402 | 2021-09-02      |
| hCoV-19/Japan/PG-90846/2021 | EPI_ISL_3901403 | 2021-09-02      |
| hCoV-19/Japan/PG-90847/2021 | EPI_ISL_3901404 | 2021-09-02      |
| hCoV-19/Japan/PG-90848/2021 | EPI_ISL_3901405 | 2021-09-02      |
| hCoV-19/Japan/PG-90849/2021 | EPI_ISL_3901406 | 2021-09-02      |
| hCoV-19/Japan/PG-90850/2021 | EPI_ISL_3901407 | 2021-09-02      |
| hCoV-19/Japan/PG-90851/2021 | EPI_ISL_3901408 | 2021-09-02      |
| hCoV-19/Japan/PG-90852/2021 | EPI_ISL_3901409 | 2021-09-02      |
| hCoV-19/Japan/PG-90853/2021 | EPI_ISL_3901410 | 2021-09-02      |
| hCoV-19/Japan/PG-90854/2021 | EPI_ISL_3901411 | 2021-09-02      |
| hCoV-19/Japan/PG-90855/2021 | EPI_ISL_3901412 | 2021-09-02      |
| hCoV-19/Japan/PG-90856/2021 | EPI_ISL_3901413 | 2021-09-02      |
| hCoV-19/Japan/PG-90857/2021 | EPI_ISL_3901414 | 2021-09-02      |
| hCoV-19/Japan/PG-90858/2021 | EPI_ISL_3901415 | 2021-09-02      |
| hCoV-19/Japan/PG-90859/2021 | EPI_ISL_3901416 | 2021-09-02      |
| hCoV-19/Japan/PG-90860/2021 | EPI_ISL_3901417 | 2021-09-02      |
| hCoV-19/Japan/PG-90861/2021 | EPI_ISL_3901418 | 2021-09-02      |
| hCoV-19/Japan/PG-90862/2021 | EPI_ISL_3901419 | 2021-09-02      |
| hCoV-19/Japan/PG-90863/2021 | EPI_ISL_3901420 | 2021-09-02      |
| hCoV-19/Japan/PG-90864/2021 | EPI_ISL_3901421 | 2021-09-02      |
| hCoV-19/Japan/PG-90865/2021 | EPI_ISL_3901422 | 2021-09-02      |
| hCoV-19/Japan/PG-90866/2021 | EPI_ISL_3901423 | 2021-09-02      |
| hCoV-19/Japan/PG-90867/2021 | EPI_ISL_3901424 | 2021-09-02      |
| hCoV-19/Japan/PG-90868/2021 | EPI_ISL_3901425 | 2021-09-02      |
| hCoV-19/Japan/PG-90869/2021 | EPI_ISL_3901426 | 2021-09-02      |
| hCoV-19/Japan/PG-90870/2021 | EPI_ISL_3901427 | 2021-09-02      |
| hCoV-19/Japan/PG-90871/2021 | EPI_ISL_3901428 | 2021-09-02      |
| hCoV-19/Japan/PG-90872/2021 | EPI_ISL_3901429 | 2021-09-02      |
| hCoV-19/Japan/PG-90873/2021 | EPI_ISL_3901430 | 2021-09-02      |
| hCoV-19/Japan/PG-90874/2021 | EPI_ISL_3901431 | 2021-09-02      |
| hCoV-19/Japan/PG-90875/2021 | EPI_ISL_3901432 | 2021-09-02      |
| hCoV-19/Japan/PG-90876/2021 | EPI_ISL_3901433 | 2021-09-02      |

| virus_name                  | epiID           | submission_date |
|-----------------------------|-----------------|-----------------|
| hCoV-19/Japan/PG-90877/2021 | EPI_ISL_3901434 | 2021-09-02      |
| hCoV-19/Japan/PG-90878/2021 | EPI_ISL_3901435 | 2021-09-02      |
| hCoV-19/Japan/PG-90879/2021 | EPI_ISL_3901436 | 2021-09-02      |
| hCoV-19/Japan/PG-90880/2021 | EPI_ISL_3901437 | 2021-09-02      |
| hCoV-19/Japan/PG-90881/2021 | EPI_ISL_3901438 | 2021-09-02      |
| hCoV-19/Japan/PG-90882/2021 | EPI_ISL_3901439 | 2021-09-02      |
| hCoV-19/Japan/PG-90883/2021 | EPI_ISL_3901440 | 2021-09-02      |
| hCoV-19/Japan/PG-90884/2021 | EPI_ISL_3901441 | 2021-09-02      |
| hCoV-19/Japan/PG-90885/2021 | EPI_ISL_3901442 | 2021-09-02      |
| hCoV-19/Japan/PG-90886/2021 | EPI_ISL_3901443 | 2021-09-02      |
| hCoV-19/Japan/PG-90887/2021 | EPI_ISL_3901444 | 2021-09-02      |
| hCoV-19/Japan/PG-90888/2021 | EPI_ISL_3901445 | 2021-09-02      |
| hCoV-19/Japan/PG-90889/2021 | EPI_ISL_3901446 | 2021-09-02      |
| hCoV-19/Japan/PG-90890/2021 | EPI_ISL_3901447 | 2021-09-02      |
| hCoV-19/Japan/PG-90891/2021 | EPI_ISL_3901448 | 2021-09-02      |
| hCoV-19/Japan/PG-90892/2021 | EPI_ISL_3901449 | 2021-09-02      |
| hCoV-19/Japan/PG-90893/2021 | EPI_ISL_3901450 | 2021-09-02      |
| hCoV-19/Japan/PG-90894/2021 | EPI_ISL_3901451 | 2021-09-02      |
| hCoV-19/Japan/PG-90895/2021 | EPI_ISL_3901452 | 2021-09-02      |
| hCoV-19/Japan/PG-90896/2021 | EPI_ISL_3901453 | 2021-09-02      |
| hCoV-19/Japan/PG-90897/2021 | EPI_ISL_3901454 | 2021-09-02      |
| hCoV-19/Japan/PG-90898/2021 | EPI_ISL_3901455 | 2021-09-02      |
| hCoV-19/Japan/PG-90899/2021 | EPI_ISL_3901456 | 2021-09-02      |
| hCoV-19/Japan/PG-90900/2021 | EPI_ISL_3901457 | 2021-09-02      |
| hCoV-19/Japan/PG-90901/2021 | EPI_ISL_3901458 | 2021-09-02      |
| hCoV-19/Japan/PG-90902/2021 | EPI_ISL_3901459 | 2021-09-02      |
| hCoV-19/Japan/PG-90903/2021 | EPI_ISL_3901460 | 2021-09-02      |
| hCoV-19/Japan/PG-90904/2021 | EPI_ISL_3901461 | 2021-09-02      |
| hCoV-19/Japan/PG-90905/2021 | EPI_ISL_3901462 | 2021-09-02      |
| hCoV-19/Japan/PG-90906/2021 | EPI_ISL_3901463 | 2021-09-02      |
| hCoV-19/Japan/PG-90907/2021 | EPI_ISL_3901464 | 2021-09-02      |
| hCoV-19/Japan/PG-90908/2021 | EPI_ISL_3901465 | 2021-09-02      |
| hCoV-19/Japan/PG-90909/2021 | EPI_ISL_3901466 | 2021-09-02      |
| hCoV-19/Japan/PG-90910/2021 | EPI_ISL_3901467 | 2021-09-02      |
| hCoV-19/Japan/PG-90911/2021 | EPI_ISL_3901468 | 2021-09-02      |
| hCoV-19/Japan/PG-90912/2021 | EPI_ISL_3901469 | 2021-09-02      |
| hCoV-19/Japan/PG-90913/2021 | EPI_ISL_3901470 | 2021-09-02      |
| hCoV-19/Japan/PG-90914/2021 | EPI_ISL_3901471 | 2021-09-02      |
| hCoV-19/Japan/PG-90915/2021 | EPI_ISL_3901472 | 2021-09-02      |
| hCoV-19/Japan/PG-90916/2021 | EPI_ISL_3901473 | 2021-09-02      |
| hCoV-19/Japan/PG-90917/2021 | EPI_ISL_3901474 | 2021-09-02      |
| hCoV-19/Japan/PG-90918/2021 | EPI_ISL_3901475 | 2021-09-02      |
| hCoV-19/Japan/PG-90919/2021 | EPI_ISL_3901476 | 2021-09-02      |
| hCoV-19/Japan/PG-90920/2021 | EPI_ISL_3901477 | 2021-09-02      |
| hCoV-19/Japan/PG-90921/2021 | EPI_ISL_3901478 | 2021-09-02      |
| hCoV-19/Japan/PG-90922/2021 | EPI_ISL_3901479 | 2021-09-02      |
| hCoV-19/Japan/PG-90923/2021 | EPI_ISL_3901480 | 2021-09-02      |
| hCoV-19/Japan/PG-90924/2021 | EPI_ISL_3901481 | 2021-09-02      |
| hCoV-19/Japan/PG-90925/2021 | EPI_ISL_3901482 | 2021-09-02      |
| hCoV-19/Japan/PG-90926/2021 | EPI_ISL_3901483 | 2021-09-02      |
| hCoV-19/Japan/PG-90927/2021 | EPI_ISL_3901484 | 2021-09-02      |
| hCoV-19/Japan/PG-90928/2021 | EPI_ISL_3901485 | 2021-09-02      |
| hCoV-19/Japan/PG-90929/2021 | EPI_ISL_3901486 | 2021-09-02      |
| hCoV-19/Japan/PG-90930/2021 | EPI_ISL_3901487 | 2021-09-02      |

| virus_name                  | epiID           | submission_date |
|-----------------------------|-----------------|-----------------|
| hCoV-19/Japan/PG-90931/2021 | EPI_ISL_3901488 | 2021-09-02      |
| hCoV-19/Japan/PG-90932/2021 | EPI_ISL_3901489 | 2021-09-02      |
| hCoV-19/Japan/PG-90933/2021 | EPI_ISL_3901490 | 2021-09-02      |
| hCoV-19/Japan/PG-90934/2021 | EPI_ISL_3901491 | 2021-09-02      |
| hCoV-19/Japan/PG-90935/2021 | EPI_ISL_3901492 | 2021-09-02      |
| hCoV-19/Japan/PG-90936/2021 | EPI_ISL_3901493 | 2021-09-02      |
| hCoV-19/Japan/PG-90937/2021 | EPI_ISL_3901494 | 2021-09-02      |
| hCoV-19/Japan/PG-90938/2021 | EPI_ISL_3901495 | 2021-09-02      |
| hCoV-19/Japan/PG-90939/2021 | EPI_ISL_3901496 | 2021-09-02      |
| hCoV-19/Japan/PG-90940/2021 | EPI_ISL_3901497 | 2021-09-02      |
| hCoV-19/Japan/PG-90941/2021 | EPI_ISL_3901498 | 2021-09-02      |
| hCoV-19/Japan/PG-90942/2021 | EPI_ISL_3901499 | 2021-09-02      |
| hCoV-19/Japan/PG-90943/2021 | EPI_ISL_3901500 | 2021-09-02      |
| hCoV-19/Japan/PG-90944/2021 | EPI_ISL_3901501 | 2021-09-02      |
| hCoV-19/Japan/PG-90945/2021 | EPI_ISL_3901502 | 2021-09-02      |
| hCoV-19/Japan/PG-90946/2021 | EPI_ISL_3901503 | 2021-09-02      |
| hCoV-19/Japan/PG-90947/2021 | EPI_ISL_3901504 | 2021-09-02      |
| hCoV-19/Japan/PG-90948/2021 | EPI_ISL_3901505 | 2021-09-02      |
| hCoV-19/Japan/PG-90949/2021 | EPI_ISL_3901506 | 2021-09-02      |
| hCoV-19/Japan/PG-90950/2021 | EPI_ISL_3901507 | 2021-09-02      |
| hCoV-19/Japan/PG-90951/2021 | EPI_ISL_3901508 | 2021-09-02      |
| hCoV-19/Japan/PG-90952/2021 | EPI_ISL_3901509 | 2021-09-02      |
| hCoV-19/Japan/PG-90953/2021 | EPI_ISL_3901510 | 2021-09-02      |
| hCoV-19/Japan/PG-90954/2021 | EPI_ISL_3901511 | 2021-09-02      |
| hCoV-19/Japan/PG-90955/2021 | EPI_ISL_3901512 | 2021-09-02      |
| hCoV-19/Japan/PG-90956/2021 | EPI_ISL_3901513 | 2021-09-02      |
| hCoV-19/Japan/PG-90957/2021 | EPI_ISL_3901514 | 2021-09-02      |
| hCoV-19/Japan/PG-90958/2021 | EPI_ISL_3901515 | 2021-09-02      |
| hCoV-19/Japan/PG-90959/2021 | EPI_ISL_3901516 | 2021-09-02      |
| hCoV-19/Japan/PG-90960/2021 | EPI_ISL_3901517 | 2021-09-02      |
| hCoV-19/Japan/PG-90961/2021 | EPI_ISL_3901518 | 2021-09-02      |
| hCoV-19/Japan/PG-90962/2021 | EPI_ISL_3901519 | 2021-09-02      |
| hCoV-19/Japan/PG-90963/2021 | EPI_ISL_3901520 | 2021-09-02      |
| hCoV-19/Japan/PG-90964/2021 | EPI_ISL_3901521 | 2021-09-02      |
| hCoV-19/Japan/PG-90965/2021 | EPI_ISL_3901522 | 2021-09-02      |
| hCoV-19/Japan/PG-90966/2021 | EPI_ISL_3901523 | 2021-09-02      |
| hCoV-19/Japan/PG-90967/2021 | EPI_ISL_3901524 | 2021-09-02      |
| hCoV-19/Japan/PG-90968/2021 | EPI_ISL_3901525 | 2021-09-02      |
| hCoV-19/Japan/PG-90969/2021 | EPI_ISL_3901526 | 2021-09-02      |
| hCoV-19/Japan/PG-90970/2021 | EPI_ISL_3901527 | 2021-09-02      |
| hCoV-19/Japan/PG-90971/2021 | EPI_ISL_3901528 | 2021-09-02      |
| hCoV-19/Japan/PG-90972/2021 | EPI_ISL_3901529 | 2021-09-02      |
| hCoV-19/Japan/PG-90973/2021 | EPI_ISL_3901530 | 2021-09-02      |
| hCoV-19/Japan/PG-90974/2021 | EPI_ISL_3901531 | 2021-09-02      |
| hCoV-19/Japan/PG-90975/2021 | EPI_ISL_3901532 | 2021-09-02      |
| hCoV-19/Japan/PG-90976/2021 | EPI_ISL_3901533 | 2021-09-02      |
| hCoV-19/Japan/PG-90977/2021 | EPI_ISL_3901534 | 2021-09-02      |
| hCoV-19/Japan/PG-90978/2021 | EPI_ISL_3901535 | 2021-09-02      |
| hCoV-19/Japan/PG-90979/2021 | EPI_ISL_3901536 | 2021-09-02      |
| hCoV-19/Japan/PG-90980/2021 | EPI_ISL_3901537 | 2021-09-02      |
| hCoV-19/Japan/PG-90981/2021 | EPI_ISL_3901538 | 2021-09-02      |
| hCoV-19/Japan/PG-90982/2021 | EPI_ISL_3901539 | 2021-09-02      |
| hCoV-19/Japan/PG-90983/2021 | EPI_ISL_3901540 | 2021-09-02      |
| hCoV-19/Japan/PG-90984/2021 | EPI_ISL_3901541 | 2021-09-02      |

| virus_name                  | epiID           | submission_date |
|-----------------------------|-----------------|-----------------|
| hCoV-19/Japan/PG-90985/2021 | EPI_ISL_3901542 | 2021-09-02      |
| hCoV-19/Japan/PG-90986/2021 | EPI_ISL_3901543 | 2021-09-02      |
| hCoV-19/Japan/PG-90987/2021 | EPI_ISL_3901544 | 2021-09-02      |
| hCoV-19/Japan/PG-90988/2021 | EPI_ISL_3901545 | 2021-09-02      |
| hCoV-19/Japan/PG-90989/2021 | EPI_ISL_3901546 | 2021-09-02      |
| hCoV-19/Japan/PG-90990/2021 | EPI_ISL_3901547 | 2021-09-02      |
| hCoV-19/Japan/PG-90991/2021 | EPI_ISL_3901548 | 2021-09-02      |
| hCoV-19/Japan/PG-90992/2021 | EPI_ISL_3901549 | 2021-09-02      |
| hCoV-19/Japan/PG-90993/2021 | EPI_ISL_3901550 | 2021-09-02      |
| hCoV-19/Japan/PG-90994/2021 | EPI_ISL_3901551 | 2021-09-02      |
| hCoV-19/Japan/PG-90995/2021 | EPI_ISL_3901552 | 2021-09-02      |
| hCoV-19/Japan/PG-90996/2021 | EPI_ISL_3901553 | 2021-09-02      |
| hCoV-19/Japan/PG-90997/2021 | EPI_ISL_3901554 | 2021-09-02      |
| hCoV-19/Japan/PG-90998/2021 | EPI_ISL_3901555 | 2021-09-02      |
| hCoV-19/Japan/PG-90999/2021 | EPI_ISL_3901556 | 2021-09-02      |
| hCoV-19/Japan/PG-91000/2021 | EPI_ISL_3901557 | 2021-09-02      |
| hCoV-19/Japan/PG-91001/2021 | EPI_ISL_3901558 | 2021-09-02      |
| hCoV-19/Japan/PG-91002/2021 | EPI_ISL_3901559 | 2021-09-02      |
| hCoV-19/Japan/PG-91003/2021 | EPI_ISL_3901560 | 2021-09-02      |
| hCoV-19/Japan/PG-91004/2021 | EPI_ISL_3901562 | 2021-09-02      |
| hCoV-19/Japan/PG-91005/2021 | EPI_ISL_3901563 | 2021-09-02      |
| hCoV-19/Japan/PG-91006/2021 | EPI_ISL_3901564 | 2021-09-02      |
| hCoV-19/Japan/PG-91007/2021 | EPI_ISL_3901565 | 2021-09-02      |
| hCoV-19/Japan/PG-91008/2021 | EPI_ISL_3901566 | 2021-09-02      |
| hCoV-19/Japan/PG-91009/2021 | EPI_ISL_3901567 | 2021-09-02      |
| hCoV-19/Japan/PG-91010/2021 | EPI_ISL_3901568 | 2021-09-02      |
| hCoV-19/Japan/PG-91011/2021 | EPI_ISL_3901569 | 2021-09-02      |
| hCoV-19/Japan/PG-91012/2021 | EPI_ISL_3901570 | 2021-09-02      |
| hCoV-19/Japan/PG-91013/2021 | EPI_ISL_3901571 | 2021-09-02      |
| hCoV-19/Japan/PG-91014/2021 | EPI_ISL_3901572 | 2021-09-02      |
| hCoV-19/Japan/PG-91015/2021 | EPI_ISL_3901573 | 2021-09-02      |
| hCoV-19/Japan/PG-91016/2021 | EPI_ISL_3901574 | 2021-09-02      |
| hCoV-19/Japan/PG-91017/2021 | EPI_ISL_3901575 | 2021-09-02      |
| hCoV-19/Japan/PG-91018/2021 | EPI_ISL_3901576 | 2021-09-02      |
| hCoV-19/Japan/PG-91019/2021 | EPI_ISL_3901577 | 2021-09-02      |
| hCoV-19/Japan/PG-91020/2021 | EPI_ISL_3901578 | 2021-09-02      |
| hCoV-19/Japan/PG-91021/2021 | EPI_ISL_3901579 | 2021-09-02      |
| hCoV-19/Japan/PG-91022/2021 | EPI_ISL_3901580 | 2021-09-02      |
| hCoV-19/Japan/PG-91023/2021 | EPI_ISL_3901581 | 2021-09-02      |
| hCoV-19/Japan/PG-91024/2021 | EPI_ISL_3901582 | 2021-09-02      |
| hCoV-19/Japan/PG-91025/2021 | EPI_ISL_3901583 | 2021-09-02      |
| hCoV-19/Japan/PG-91026/2021 | EPI_ISL_3901584 | 2021-09-02      |
| hCoV-19/Japan/PG-91027/2021 | EPI_ISL_3901585 | 2021-09-02      |
| hCoV-19/Japan/PG-91028/2021 | EPI_ISL_3901586 | 2021-09-02      |
| hCoV-19/Japan/PG-91029/2021 | EPI_ISL_3901587 | 2021-09-02      |
| hCoV-19/Japan/PG-91030/2021 | EPI_ISL_3901588 | 2021-09-02      |
| hCoV-19/Japan/PG-91031/2021 | EPI_ISL_3901589 | 2021-09-02      |
| hCoV-19/Japan/PG-91032/2021 | EPI_ISL_3901590 | 2021-09-02      |
| hCoV-19/Japan/PG-91033/2021 | EPI_ISL_3901591 | 2021-09-02      |
| hCoV-19/Japan/PG-91034/2021 | EPI_ISL_3901592 | 2021-09-02      |
| hCoV-19/Japan/PG-91035/2021 | EPI_ISL_3901593 | 2021-09-02      |
| hCoV-19/Japan/PG-91036/2021 | EPI_ISL_3901594 | 2021-09-02      |
| hCoV-19/Japan/PG-91037/2021 | EPI_ISL_3901595 | 2021-09-02      |
| hCoV-19/Japan/PG-91038/2021 | EPI_ISL_3901596 | 2021-09-02      |

| virus_name                  | epiID           | submission_date |
|-----------------------------|-----------------|-----------------|
| hCoV-19/Japan/PG-91039/2021 | EPI_ISL_3901597 | 2021-09-02      |
| hCoV-19/Japan/PG-91040/2021 | EPI_ISL_3901598 | 2021-09-02      |
| hCoV-19/Japan/PG-91041/2021 | EPI_ISL_3901599 | 2021-09-02      |
| hCoV-19/Japan/PG-91042/2021 | EPI_ISL_3901600 | 2021-09-02      |
| hCoV-19/Japan/PG-91043/2021 | EPI_ISL_3901601 | 2021-09-02      |
| hCoV-19/Japan/PG-91044/2021 | EPI_ISL_3901602 | 2021-09-02      |
| hCoV-19/Japan/PG-91045/2021 | EPI_ISL_3901603 | 2021-09-02      |
| hCoV-19/Japan/PG-91046/2021 | EPI_ISL_3901604 | 2021-09-02      |
| hCoV-19/Japan/PG-91047/2021 | EPI_ISL_3901605 | 2021-09-02      |
| hCoV-19/Japan/PG-91048/2021 | EPI_ISL_3901606 | 2021-09-02      |
| hCoV-19/Japan/PG-91049/2021 | EPI_ISL_3901607 | 2021-09-02      |
| hCoV-19/Japan/PG-91050/2021 | EPI_ISL_3901608 | 2021-09-02      |
| hCoV-19/Japan/PG-91051/2021 | EPI_ISL_3901609 | 2021-09-02      |
| hCoV-19/Japan/PG-91052/2021 | EPI_ISL_3901610 | 2021-09-02      |
| hCoV-19/Japan/PG-91053/2021 | EPI_ISL_3901612 | 2021-09-02      |
| hCoV-19/Japan/PG-91054/2021 | EPI_ISL_3901613 | 2021-09-02      |
| hCoV-19/Japan/PG-91055/2021 | EPI_ISL_3901614 | 2021-09-02      |
| hCoV-19/Japan/PG-91056/2021 | EPI_ISL_3901617 | 2021-09-02      |
| hCoV-19/Japan/PG-91057/2021 | EPI_ISL_3901620 | 2021-09-02      |
| hCoV-19/Japan/PG-91058/2021 | EPI_ISL_3901623 | 2021-09-02      |
| hCoV-19/Japan/PG-91059/2021 | EPI_ISL_3901626 | 2021-09-02      |
| hCoV-19/Japan/PG-91060/2021 | EPI_ISL_3901629 | 2021-09-02      |
| hCoV-19/Japan/PG-91061/2021 | EPI_ISL_3901633 | 2021-09-02      |
| hCoV-19/Japan/PG-91062/2021 | EPI_ISL_3901636 | 2021-09-02      |
| hCoV-19/Japan/PG-91063/2021 | EPI_ISL_3901639 | 2021-09-02      |
| hCoV-19/Japan/PG-91064/2021 | EPI_ISL_3901642 | 2021-09-02      |
| hCoV-19/Japan/PG-91065/2021 | EPI_ISL_3901645 | 2021-09-02      |
| hCoV-19/Japan/PG-91066/2021 | EPI_ISL_3901648 | 2021-09-02      |
| hCoV-19/Japan/PG-91067/2021 | EPI_ISL_3901649 | 2021-09-02      |
| hCoV-19/Japan/PG-91068/2021 | EPI_ISL_3901650 | 2021-09-02      |
| hCoV-19/Japan/PG-91069/2021 | EPI_ISL_3901652 | 2021-09-02      |
| hCoV-19/Japan/PG-91070/2021 | EPI_ISL_3901653 | 2021-09-02      |
| hCoV-19/Japan/PG-91071/2021 | EPI_ISL_3901654 | 2021-09-02      |
| hCoV-19/Japan/PG-91072/2021 | EPI_ISL_3901655 | 2021-09-02      |
| hCoV-19/Japan/PG-91073/2021 | EPI_ISL_3901657 | 2021-09-02      |
| hCoV-19/Japan/PG-91074/2021 | EPI_ISL_3901658 | 2021-09-02      |
| hCoV-19/Japan/PG-91075/2021 | EPI_ISL_3901659 | 2021-09-02      |
| hCoV-19/Japan/PG-91076/2021 | EPI_ISL_3901662 | 2021-09-02      |
| hCoV-19/Japan/PG-91077/2021 | EPI_ISL_3901665 | 2021-09-02      |
| hCoV-19/Japan/PG-91078/2021 | EPI_ISL_3901668 | 2021-09-02      |
| hCoV-19/Japan/PG-91079/2021 | EPI_ISL_3901670 | 2021-09-02      |
| hCoV-19/Japan/PG-91080/2021 | EPI_ISL_3901671 | 2021-09-02      |
| hCoV-19/Japan/PG-91081/2021 | EPI_ISL_3901672 | 2021-09-02      |
| hCoV-19/Japan/PG-91082/2021 | EPI_ISL_3901674 | 2021-09-02      |
| hCoV-19/Japan/PG-91083/2021 | EPI_ISL_3901675 | 2021-09-02      |
| hCoV-19/Japan/PG-91084/2021 | EPI_ISL_3901676 | 2021-09-02      |
| hCoV-19/Japan/PG-91085/2021 | EPI_ISL_3901678 | 2021-09-02      |
| hCoV-19/Japan/PG-91086/2021 | EPI_ISL_3901679 | 2021-09-02      |
| hCoV-19/Japan/PG-91087/2021 | EPI_ISL_3901680 | 2021-09-02      |
| hCoV-19/Japan/PG-91088/2021 | EPI_ISL_3901682 | 2021-09-02      |
| hCoV-19/Japan/PG-91089/2021 | EPI_ISL_3901683 | 2021-09-02      |
| hCoV-19/Japan/PG-91090/2021 | EPI_ISL_3901684 | 2021-09-02      |
| hCoV-19/Japan/PG-91091/2021 | EPI_ISL_3901686 | 2021-09-02      |
| hCoV-19/Japan/PG-91092/2021 | EPI_ISL_3901687 | 2021-09-02      |

| virus_name                  | epiID           | submission_date |
|-----------------------------|-----------------|-----------------|
| hCoV-19/Japan/PG-91093/2021 | EPI_ISL_3901688 | 2021-09-02      |
| hCoV-19/Japan/PG-91094/2021 | EPI_ISL_3901690 | 2021-09-02      |
| hCoV-19/Japan/PG-91095/2021 | EPI_ISL_3901691 | 2021-09-02      |
| hCoV-19/Japan/PG-91096/2021 | EPI_ISL_3901692 | 2021-09-02      |
| hCoV-19/Japan/PG-91097/2021 | EPI_ISL_3901694 | 2021-09-02      |
| hCoV-19/Japan/PG-91098/2021 | EPI_ISL_3901695 | 2021-09-02      |
| hCoV-19/Japan/PG-91099/2021 | EPI_ISL_3901696 | 2021-09-02      |
| hCoV-19/Japan/PG-91100/2021 | EPI_ISL_3901698 | 2021-09-02      |
| hCoV-19/Japan/PG-91101/2021 | EPI_ISL_3901699 | 2021-09-02      |
| hCoV-19/Japan/PG-91102/2021 | EPI_ISL_3901701 | 2021-09-02      |
| hCoV-19/Japan/PG-91103/2021 | EPI_ISL_3901702 | 2021-09-02      |
| hCoV-19/Japan/PG-91104/2021 | EPI_ISL_3901703 | 2021-09-02      |
| hCoV-19/Japan/PG-91105/2021 | EPI_ISL_3901705 | 2021-09-02      |
| hCoV-19/Japan/PG-91106/2021 | EPI_ISL_3901706 | 2021-09-02      |
| hCoV-19/Japan/PG-91107/2021 | EPI_ISL_3901707 | 2021-09-02      |
| hCoV-19/Japan/PG-91108/2021 | EPI_ISL_3901709 | 2021-09-02      |
| hCoV-19/Japan/PG-91109/2021 | EPI_ISL_3901710 | 2021-09-02      |
| hCoV-19/Japan/PG-91110/2021 | EPI_ISL_3901711 | 2021-09-02      |
| hCoV-19/Japan/PG-91111/2021 | EPI_ISL_3901713 | 2021-09-02      |
| hCoV-19/Japan/PG-91112/2021 | EPI_ISL_3901714 | 2021-09-02      |
| hCoV-19/Japan/PG-91113/2021 | EPI_ISL_3901715 | 2021-09-02      |
| hCoV-19/Japan/PG-91114/2021 | EPI_ISL_3901718 | 2021-09-02      |
| hCoV-19/Japan/PG-91115/2021 | EPI_ISL_3901721 | 2021-09-02      |
| hCoV-19/Japan/PG-91116/2021 | EPI_ISL_3901724 | 2021-09-02      |
| hCoV-19/Japan/PG-91117/2021 | EPI_ISL_3901726 | 2021-09-02      |
| hCoV-19/Japan/PG-91118/2021 | EPI_ISL_3901727 | 2021-09-02      |
| hCoV-19/Japan/PG-91119/2021 | EPI_ISL_3901728 | 2021-09-02      |
| hCoV-19/Japan/PG-91120/2021 | EPI_ISL_3901731 | 2021-09-02      |
| hCoV-19/Japan/PG-91121/2021 | EPI_ISL_3901734 | 2021-09-02      |
| hCoV-19/Japan/PG-91122/2021 | EPI_ISL_3901737 | 2021-09-02      |
| hCoV-19/Japan/PG-91123/2021 | EPI_ISL_3901739 | 2021-09-02      |
| hCoV-19/Japan/PG-91124/2021 | EPI_ISL_3901740 | 2021-09-02      |
| hCoV-19/Japan/PG-91125/2021 | EPI_ISL_3901741 | 2021-09-02      |
| hCoV-19/Japan/PG-91126/2021 | EPI_ISL_3901745 | 2021-09-02      |
| hCoV-19/Japan/PG-91127/2021 | EPI_ISL_3901748 | 2021-09-02      |
| hCoV-19/Japan/PG-91128/2021 | EPI_ISL_3901751 | 2021-09-02      |
| hCoV-19/Japan/PG-91129/2021 | EPI_ISL_3901752 | 2021-09-02      |
| hCoV-19/Japan/PG-91130/2021 | EPI_ISL_3901753 | 2021-09-02      |
| hCoV-19/Japan/PG-91131/2021 | EPI_ISL_3901755 | 2021-09-02      |
| hCoV-19/Japan/PG-91132/2021 | EPI_ISL_3901758 | 2021-09-02      |
| hCoV-19/Japan/PG-91133/2021 | EPI_ISL_3901761 | 2021-09-02      |
| hCoV-19/Japan/PG-91134/2021 | EPI_ISL_3901763 | 2021-09-02      |
| hCoV-19/Japan/PG-91135/2021 | EPI_ISL_3901764 | 2021-09-02      |
| hCoV-19/Japan/PG-91136/2021 | EPI_ISL_3901766 | 2021-09-02      |
| hCoV-19/Japan/PG-91137/2021 | EPI_ISL_3901769 | 2021-09-02      |
| hCoV-19/Japan/PG-91138/2021 | EPI_ISL_3901773 | 2021-09-02      |
| hCoV-19/Japan/PG-91139/2021 | EPI_ISL_3901776 | 2021-09-02      |
| hCoV-19/Japan/PG-91140/2021 | EPI_ISL_3901779 | 2021-09-02      |
| hCoV-19/Japan/PG-91141/2021 | EPI_ISL_3901782 | 2021-09-02      |
| hCoV-19/Japan/PG-91142/2021 | EPI_ISL_3901785 | 2021-09-02      |
| hCoV-19/Japan/PG-91143/2021 | EPI_ISL_3901788 | 2021-09-02      |
| hCoV-19/Japan/PG-91144/2021 | EPI_ISL_3901792 | 2021-09-02      |
| hCoV-19/Japan/PG-91145/2021 | EPI_ISL_3901795 | 2021-09-02      |
| hCoV-19/Japan/PG-91146/2021 | EPI_ISL_3901798 | 2021-09-02      |

| virus_name                  | epiID           | submission_date |
|-----------------------------|-----------------|-----------------|
| hCoV-19/Japan/PG-91147/2021 | EPI_ISL_3901801 | 2021-09-02      |
| hCoV-19/Japan/PG-91148/2021 | EPI_ISL_3901805 | 2021-09-02      |
| hCoV-19/Japan/PG-91149/2021 | EPI_ISL_3901806 | 2021-09-02      |
| hCoV-19/Japan/PG-91150/2021 | EPI_ISL_3901807 | 2021-09-02      |
| hCoV-19/Japan/PG-91151/2021 | EPI_ISL_3901809 | 2021-09-02      |
| hCoV-19/Japan/PG-91152/2021 | EPI_ISL_3901812 | 2021-09-02      |
| hCoV-19/Japan/PG-91153/2021 | EPI_ISL_3901815 | 2021-09-02      |
| hCoV-19/Japan/PG-91154/2021 | EPI_ISL_3901818 | 2021-09-02      |
| hCoV-19/Japan/PG-91155/2021 | EPI_ISL_3901820 | 2021-09-02      |
| hCoV-19/Japan/PG-91156/2021 | EPI_ISL_3901821 | 2021-09-02      |
| hCoV-19/Japan/PG-91157/2021 | EPI_ISL_3901823 | 2021-09-02      |
| hCoV-19/Japan/PG-91158/2021 | EPI_ISL_3901826 | 2021-09-02      |
| hCoV-19/Japan/PG-91159/2021 | EPI_ISL_3901829 | 2021-09-02      |
| hCoV-19/Japan/PG-91160/2021 | EPI_ISL_3901832 | 2021-09-02      |
| hCoV-19/Japan/PG-91161/2021 | EPI_ISL_3901835 | 2021-09-02      |
| hCoV-19/Japan/PG-91162/2021 | EPI_ISL_3901839 | 2021-09-02      |
| hCoV-19/Japan/PG-91163/2021 | EPI_ISL_3901842 | 2021-09-02      |
| hCoV-19/Japan/PG-91164/2021 | EPI_ISL_3901843 | 2021-09-02      |
| hCoV-19/Japan/PG-91165/2021 | EPI_ISL_3901844 | 2021-09-02      |
| hCoV-19/Japan/PG-91166/2021 | EPI_ISL_3901846 | 2021-09-02      |
| hCoV-19/Japan/PG-91167/2021 | EPI_ISL_3901847 | 2021-09-02      |
| hCoV-19/Japan/PG-91168/2021 | EPI_ISL_3901848 | 2021-09-02      |
| hCoV-19/Japan/PG-91169/2021 | EPI_ISL_3901850 | 2021-09-02      |
| hCoV-19/Japan/PG-91170/2021 | EPI_ISL_3901851 | 2021-09-02      |
| hCoV-19/Japan/PG-91171/2021 | EPI_ISL_3901852 | 2021-09-02      |
| hCoV-19/Japan/PG-91172/2021 | EPI_ISL_3901854 | 2021-09-02      |
| hCoV-19/Japan/PG-91173/2021 | EPI_ISL_3901855 | 2021-09-02      |
| hCoV-19/Japan/PG-91174/2021 | EPI_ISL_3901856 | 2021-09-02      |
| hCoV-19/Japan/PG-91175/2021 | EPI_ISL_3901858 | 2021-09-02      |
| hCoV-19/Japan/PG-91176/2021 | EPI_ISL_3901859 | 2021-09-02      |
| hCoV-19/Japan/PG-91177/2021 | EPI_ISL_3901860 | 2021-09-02      |
| hCoV-19/Japan/PG-91178/2021 | EPI_ISL_3901861 | 2021-09-02      |
| hCoV-19/Japan/PG-91179/2021 | EPI_ISL_3901864 | 2021-09-02      |
| hCoV-19/Japan/PG-91180/2021 | EPI_ISL_3901868 | 2021-09-02      |
| hCoV-19/Japan/PG-91181/2021 | EPI_ISL_3901870 | 2021-09-02      |
| hCoV-19/Japan/PG-91182/2021 | EPI_ISL_3901873 | 2021-09-02      |
| hCoV-19/Japan/PG-91183/2021 | EPI_ISL_3901876 | 2021-09-02      |
| hCoV-19/Japan/PG-91184/2021 | EPI_ISL_3901880 | 2021-09-02      |
| hCoV-19/Japan/PG-91185/2021 | EPI_ISL_3901883 | 2021-09-02      |
| hCoV-19/Japan/PG-91186/2021 | EPI_ISL_3901886 | 2021-09-02      |
| hCoV-19/Japan/PG-91187/2021 | EPI_ISL_3901889 | 2021-09-02      |
| hCoV-19/Japan/PG-91188/2021 | EPI_ISL_3901892 | 2021-09-02      |
| hCoV-19/Japan/PG-91189/2021 | EPI_ISL_3901893 | 2021-09-02      |
| hCoV-19/Japan/PG-91190/2021 | EPI_ISL_3901894 | 2021-09-02      |
| hCoV-19/Japan/PG-91191/2021 | EPI_ISL_3901897 | 2021-09-02      |
| hCoV-19/Japan/PG-91192/2021 | EPI_ISL_3901900 | 2021-09-02      |
| hCoV-19/Japan/PG-91193/2021 | EPI_ISL_3901903 | 2021-09-02      |
| hCoV-19/Japan/PG-91194/2021 | EPI_ISL_3901906 | 2021-09-02      |
| hCoV-19/Japan/PG-91195/2021 | EPI_ISL_3901910 | 2021-09-02      |
| hCoV-19/Japan/PG-91196/2021 | EPI_ISL_3901913 | 2021-09-02      |
| hCoV-19/Japan/PG-91197/2021 | EPI_ISL_3901916 | 2021-09-02      |
| hCoV-19/Japan/PG-91198/2021 | EPI_ISL_3901919 | 2021-09-02      |
| hCoV-19/Japan/PG-91199/2021 | EPI_ISL_3901921 | 2021-09-02      |
| hCoV-19/Japan/PG-91200/2021 | EPI_ISL_3901922 | 2021-09-02      |

| virus_name                  | epiID           | submission_date |
|-----------------------------|-----------------|-----------------|
| hCoV-19/Japan/PG-91201/2021 | EPI_ISL_3901924 | 2021-09-02      |
| hCoV-19/Japan/PG-91202/2021 | EPI_ISL_3901928 | 2021-09-02      |
| hCoV-19/Japan/PG-91203/2021 | EPI_ISL_3901931 | 2021-09-02      |
| hCoV-19/Japan/PG-91204/2021 | EPI_ISL_3901934 | 2021-09-02      |
| hCoV-19/Japan/PG-91205/2021 | EPI_ISL_3901937 | 2021-09-02      |
| hCoV-19/Japan/PG-91206/2021 | EPI_ISL_3901940 | 2021-09-02      |
| hCoV-19/Japan/PG-91207/2021 | EPI_ISL_3901944 | 2021-09-02      |
| hCoV-19/Japan/PG-91208/2021 | EPI_ISL_3901947 | 2021-09-02      |
| hCoV-19/Japan/PG-91209/2021 | EPI_ISL_3901950 | 2021-09-02      |
| hCoV-19/Japan/PG-91210/2021 | EPI_ISL_3901953 | 2021-09-02      |
| hCoV-19/Japan/PG-91211/2021 | EPI_ISL_3901956 | 2021-09-02      |
| hCoV-19/Japan/PG-91212/2021 | EPI_ISL_3901960 | 2021-09-02      |
| hCoV-19/Japan/PG-91213/2021 | EPI_ISL_3901963 | 2021-09-02      |
| hCoV-19/Japan/PG-91214/2021 | EPI_ISL_3901966 | 2021-09-02      |
| hCoV-19/Japan/PG-91215/2021 | EPI_ISL_3901969 | 2021-09-02      |
| hCoV-19/Japan/PG-91216/2021 | EPI_ISL_3901973 | 2021-09-02      |
| hCoV-19/Japan/PG-91217/2021 | EPI_ISL_3901974 | 2021-09-02      |
| hCoV-19/Japan/PG-91218/2021 | EPI_ISL_3901975 | 2021-09-02      |
| hCoV-19/Japan/PG-91219/2021 | EPI_ISL_3901977 | 2021-09-02      |
| hCoV-19/Japan/PG-91220/2021 | EPI_ISL_3901981 | 2021-09-02      |
| hCoV-19/Japan/PG-91221/2021 | EPI_ISL_3901984 | 2021-09-02      |
| hCoV-19/Japan/PG-91222/2021 | EPI_ISL_3901987 | 2021-09-02      |
| hCoV-19/Japan/PG-91223/2021 | EPI_ISL_3901990 | 2021-09-02      |
| hCoV-19/Japan/PG-91224/2021 | EPI_ISL_3901993 | 2021-09-02      |
| hCoV-19/Japan/PG-91225/2021 | EPI_ISL_3901995 | 2021-09-02      |
| hCoV-19/Japan/PG-91226/2021 | EPI_ISL_3901996 | 2021-09-02      |
| hCoV-19/Japan/PG-91227/2021 | EPI_ISL_3901998 | 2021-09-02      |
| hCoV-19/Japan/PG-91228/2021 | EPI_ISL_3902000 | 2021-09-02      |
| hCoV-19/Japan/PG-91229/2021 | EPI_ISL_3902001 | 2021-09-02      |
| hCoV-19/Japan/PG-91230/2021 | EPI_ISL_3902002 | 2021-09-02      |
| hCoV-19/Japan/PG-91231/2021 | EPI_ISL_3902004 | 2021-09-02      |
| hCoV-19/Japan/PG-91232/2021 | EPI_ISL_3902005 | 2021-09-02      |
| hCoV-19/Japan/PG-91233/2021 | EPI_ISL_3902006 | 2021-09-02      |
| hCoV-19/Japan/PG-91234/2021 | EPI_ISL_3902008 | 2021-09-02      |
| hCoV-19/Japan/PG-91235/2021 | EPI_ISL_3902009 | 2021-09-02      |
| hCoV-19/Japan/PG-91236/2021 | EPI_ISL_3902010 | 2021-09-02      |
| hCoV-19/Japan/PG-91237/2021 | EPI_ISL_3902012 | 2021-09-02      |
| hCoV-19/Japan/PG-91238/2021 | EPI_ISL_3902013 | 2021-09-02      |
| hCoV-19/Japan/PG-91239/2021 | EPI_ISL_3902015 | 2021-09-02      |
| hCoV-19/Japan/PG-91240/2021 | EPI_ISL_3902016 | 2021-09-02      |
| hCoV-19/Japan/PG-91241/2021 | EPI_ISL_3902017 | 2021-09-02      |
| hCoV-19/Japan/PG-91242/2021 | EPI_ISL_3902019 | 2021-09-02      |
| hCoV-19/Japan/PG-91243/2021 | EPI_ISL_3902020 | 2021-09-02      |
| hCoV-19/Japan/PG-91244/2021 | EPI_ISL_3902021 | 2021-09-02      |
| hCoV-19/Japan/PG-91245/2021 | EPI_ISL_3902023 | 2021-09-02      |
| hCoV-19/Japan/PG-91246/2021 | EPI_ISL_3902024 | 2021-09-02      |
| hCoV-19/Japan/PG-91247/2021 | EPI_ISL_3902025 | 2021-09-02      |
| hCoV-19/Japan/PG-91248/2021 | EPI_ISL_3902028 | 2021-09-02      |
| hCoV-19/Japan/PG-91249/2021 | EPI_ISL_3902031 | 2021-09-02      |
| hCoV-19/Japan/PG-91250/2021 | EPI_ISL_3902035 | 2021-09-02      |
| hCoV-19/Japan/PG-91251/2021 | EPI_ISL_3902036 | 2021-09-02      |
| hCoV-19/Japan/PG-91252/2021 | EPI_ISL_3902037 | 2021-09-02      |
| hCoV-19/Japan/PG-91253/2021 | EPI_ISL_3902039 | 2021-09-02      |
| hCoV-19/Japan/PG-91254/2021 | EPI_ISL_3902040 | 2021-09-02      |



| virus_name                  | epiID           | submission_date |
|-----------------------------|-----------------|-----------------|
| hCoV-19/Japan/PG-91255/2021 | EPI_ISL_3902042 | 2021-09-02      |
| hCoV-19/Japan/PG-91256/2021 | EPI_ISL_3902043 | 2021-09-02      |
| hCoV-19/Japan/PG-91257/2021 | EPI_ISL_3902044 | 2021-09-02      |
| hCoV-19/Japan/PG-91258/2021 | EPI_ISL_3902046 | 2021-09-02      |
| hCoV-19/Japan/PG-91259/2021 | EPI_ISL_3902047 | 2021-09-02      |
| hCoV-19/Japan/PG-91260/2021 | EPI_ISL_3902048 | 2021-09-02      |
| hCoV-19/Japan/PG-91261/2021 | EPI_ISL_3902050 | 2021-09-02      |
| hCoV-19/Japan/PG-91262/2021 | EPI_ISL_3902051 | 2021-09-02      |
| hCoV-19/Japan/PG-91263/2021 | EPI_ISL_3902052 | 2021-09-02      |
| hCoV-19/Japan/PG-91264/2021 | EPI_ISL_3902054 | 2021-09-02      |
| hCoV-19/Japan/PG-91265/2021 | EPI_ISL_3902055 | 2021-09-02      |
| hCoV-19/Japan/PG-91266/2021 | EPI_ISL_3902057 | 2021-09-02      |
| hCoV-19/Japan/PG-91267/2021 | EPI_ISL_3902058 | 2021-09-02      |
| hCoV-19/Japan/PG-91268/2021 | EPI_ISL_3902059 | 2021-09-02      |
| hCoV-19/Japan/PG-91269/2021 | EPI_ISL_3902061 | 2021-09-02      |
| hCoV-19/Japan/PG-91270/2021 | EPI_ISL_3902062 | 2021-09-02      |
| hCoV-19/Japan/PG-91271/2021 | EPI_ISL_3902063 | 2021-09-02      |
| hCoV-19/Japan/PG-91272/2021 | EPI_ISL_3902065 | 2021-09-02      |
| hCoV-19/Japan/PG-91273/2021 | EPI_ISL_3902066 | 2021-09-02      |
| hCoV-19/Japan/PG-91274/2021 | EPI_ISL_3902067 | 2021-09-02      |
| hCoV-19/Japan/PG-91275/2021 | EPI_ISL_3902069 | 2021-09-02      |
| hCoV-19/Japan/PG-91276/2021 | EPI_ISL_3902070 | 2021-09-02      |
| hCoV-19/Japan/PG-91277/2021 | EPI_ISL_3902071 | 2021-09-02      |
| hCoV-19/Japan/PG-91278/2021 | EPI_ISL_3902073 | 2021-09-02      |
| hCoV-19/Japan/PG-91279/2021 | EPI_ISL_3902074 | 2021-09-02      |
| hCoV-19/Japan/PG-91280/2021 | EPI_ISL_3902075 | 2021-09-02      |
| hCoV-19/Japan/PG-91281/2021 | EPI_ISL_3902077 | 2021-09-02      |
| hCoV-19/Japan/PG-91282/2021 | EPI_ISL_3902078 | 2021-09-02      |
| hCoV-19/Japan/PG-91283/2021 | EPI_ISL_3902080 | 2021-09-02      |
| hCoV-19/Japan/PG-91284/2021 | EPI_ISL_3902083 | 2021-09-02      |
| hCoV-19/Japan/PG-91285/2021 | EPI_ISL_3875277 | 2021-09-02      |
| hCoV-19/Japan/PG-91286/2021 | EPI_ISL_3875278 | 2021-09-02      |
| hCoV-19/Japan/PG-91287/2021 | EPI_ISL_3875279 | 2021-09-02      |
| hCoV-19/Japan/PG-91290/2021 | EPI_ISL_3875280 | 2021-09-02      |
| hCoV-19/Japan/PG-91291/2021 | EPI_ISL_3875281 | 2021-09-02      |
| hCoV-19/Japan/PG-91292/2021 | EPI_ISL_3875282 | 2021-09-02      |
| hCoV-19/Japan/PG-91293/2021 | EPI_ISL_3875283 | 2021-09-02      |
| hCoV-19/Japan/PG-91294/2021 | EPI_ISL_3875284 | 2021-09-02      |
| hCoV-19/Japan/PG-91295/2021 | EPI_ISL_3875285 | 2021-09-02      |
| hCoV-19/Japan/PG-91296/2021 | EPI_ISL_3875286 | 2021-09-02      |
| hCoV-19/Japan/PG-91297/2021 | EPI_ISL_3875287 | 2021-09-02      |
| hCoV-19/Japan/PG-91298/2021 | EPI_ISL_3875288 | 2021-09-02      |
| hCoV-19/Japan/PG-91299/2021 | EPI_ISL_3875289 | 2021-09-02      |
| hCoV-19/Japan/PG-91300/2021 | EPI_ISL_3875290 | 2021-09-02      |
| hCoV-19/Japan/PG-91301/2021 | EPI_ISL_3875291 | 2021-09-02      |
| hCoV-19/Japan/PG-91302/2021 | EPI_ISL_3875292 | 2021-09-02      |
| hCoV-19/Japan/PG-91303/2021 | EPI_ISL_3875293 | 2021-09-02      |
| hCoV-19/Japan/PG-91304/2021 | EPI_ISL_3875294 | 2021-09-02      |
| hCoV-19/Japan/PG-91305/2021 | EPI_ISL_3875295 | 2021-09-02      |
| hCoV-19/Japan/PG-91306/2021 | EPI_ISL_3875296 | 2021-09-02      |
| hCoV-19/Japan/PG-91307/2021 | EPI_ISL_3875297 | 2021-09-02      |
| hCoV-19/Japan/PG-91308/2021 | EPI_ISL_3875298 | 2021-09-02      |
| hCoV-19/Japan/PG-91309/2021 | EPI_ISL_3875299 | 2021-09-02      |
| hCoV-19/Japan/PG-91310/2021 | EPI_ISL_3875300 | 2021-09-02      |

| virus_name                  | epiID           | submission_date |
|-----------------------------|-----------------|-----------------|
| hCoV-19/Japan/PG-91311/2021 | EPI_ISL_3875301 | 2021-09-02      |
| hCoV-19/Japan/PG-91312/2021 | EPI_ISL_3875302 | 2021-09-02      |
| hCoV-19/Japan/PG-91313/2021 | EPI_ISL_3875303 | 2021-09-02      |
| hCoV-19/Japan/PG-91314/2021 | EPI_ISL_3875304 | 2021-09-02      |
| hCoV-19/Japan/PG-91315/2021 | EPI_ISL_3875305 | 2021-09-02      |
| hCoV-19/Japan/PG-91316/2021 | EPI_ISL_3875306 | 2021-09-02      |
| hCoV-19/Japan/PG-91317/2021 | EPI_ISL_3875307 | 2021-09-02      |
| hCoV-19/Japan/PG-91318/2021 | EPI_ISL_3875308 | 2021-09-02      |
| hCoV-19/Japan/PG-91319/2021 | EPI_ISL_3875309 | 2021-09-02      |
| hCoV-19/Japan/PG-91320/2021 | EPI_ISL_3875310 | 2021-09-02      |
| hCoV-19/Japan/PG-91321/2021 | EPI_ISL_3875311 | 2021-09-02      |
| hCoV-19/Japan/PG-91322/2021 | EPI_ISL_3875312 | 2021-09-02      |
| hCoV-19/Japan/PG-91323/2021 | EPI_ISL_3875313 | 2021-09-02      |
| hCoV-19/Japan/PG-91324/2021 | EPI_ISL_3875314 | 2021-09-02      |
| hCoV-19/Japan/PG-91325/2021 | EPI_ISL_3875315 | 2021-09-02      |
| hCoV-19/Japan/PG-91326/2021 | EPI_ISL_3875316 | 2021-09-02      |
| hCoV-19/Japan/PG-91327/2021 | EPI_ISL_3875317 | 2021-09-02      |
| hCoV-19/Japan/PG-91328/2021 | EPI_ISL_3875318 | 2021-09-02      |
| hCoV-19/Japan/PG-91329/2021 | EPI_ISL_3875319 | 2021-09-02      |
| hCoV-19/Japan/PG-91330/2021 | EPI_ISL_3875320 | 2021-09-02      |
| hCoV-19/Japan/PG-91331/2021 | EPI_ISL_3875321 | 2021-09-02      |
| hCoV-19/Japan/PG-91332/2021 | EPI_ISL_3875322 | 2021-09-02      |
| hCoV-19/Japan/PG-91333/2021 | EPI_ISL_3875323 | 2021-09-02      |
| hCoV-19/Japan/PG-91334/2021 | EPI_ISL_3875324 | 2021-09-02      |
| hCoV-19/Japan/PG-91335/2021 | EPI_ISL_3875325 | 2021-09-02      |
| hCoV-19/Japan/PG-91336/2021 | EPI_ISL_3875326 | 2021-09-02      |
| hCoV-19/Japan/PG-91337/2021 | EPI_ISL_3875327 | 2021-09-02      |
| hCoV-19/Japan/PG-91338/2021 | EPI_ISL_3875328 | 2021-09-02      |
| hCoV-19/Japan/PG-91339/2021 | EPI_ISL_3875329 | 2021-09-02      |
| hCoV-19/Japan/PG-91340/2021 | EPI_ISL_3875330 | 2021-09-02      |
| hCoV-19/Japan/PG-91341/2021 | EPI_ISL_3875331 | 2021-09-02      |
| hCoV-19/Japan/PG-91342/2021 | EPI_ISL_3875332 | 2021-09-02      |
| hCoV-19/Japan/PG-91343/2021 | EPI_ISL_3875333 | 2021-09-02      |
| hCoV-19/Japan/PG-91344/2021 | EPI_ISL_3875334 | 2021-09-02      |
| hCoV-19/Japan/PG-91345/2021 | EPI_ISL_3875335 | 2021-09-02      |
| hCoV-19/Japan/PG-91346/2021 | EPI_ISL_3875336 | 2021-09-02      |
| hCoV-19/Japan/PG-91347/2021 | EPI_ISL_3875337 | 2021-09-02      |
| hCoV-19/Japan/PG-91348/2021 | EPI_ISL_3875338 | 2021-09-02      |
| hCoV-19/Japan/PG-91349/2021 | EPI_ISL_3875339 | 2021-09-02      |
| hCoV-19/Japan/PG-91350/2021 | EPI_ISL_3875340 | 2021-09-02      |
| hCoV-19/Japan/PG-91351/2021 | EPI_ISL_3875341 | 2021-09-02      |
| hCoV-19/Japan/PG-91352/2021 | EPI_ISL_3875342 | 2021-09-02      |
| hCoV-19/Japan/PG-91353/2021 | EPI_ISL_3875343 | 2021-09-02      |
| hCoV-19/Japan/PG-91354/2021 | EPI_ISL_3875344 | 2021-09-02      |
| hCoV-19/Japan/PG-91355/2021 | EPI_ISL_3875345 | 2021-09-02      |
| hCoV-19/Japan/PG-91356/2021 | EPI_ISL_3875346 | 2021-09-02      |
| hCoV-19/Japan/PG-91357/2021 | EPI_ISL_3875347 | 2021-09-02      |
| hCoV-19/Japan/PG-91358/2021 | EPI_ISL_3875348 | 2021-09-02      |
| hCoV-19/Japan/PG-91359/2021 | EPI_ISL_3875349 | 2021-09-02      |
| hCoV-19/Japan/PG-91360/2021 | EPI_ISL_3875350 | 2021-09-02      |
| hCoV-19/Japan/PG-91361/2021 | EPI_ISL_3875351 | 2021-09-02      |
| hCoV-19/Japan/PG-91362/2021 | EPI_ISL_3875352 | 2021-09-02      |
| hCoV-19/Japan/PG-91363/2021 | EPI_ISL_3875353 | 2021-09-02      |
| hCoV-19/Japan/PG-91364/2021 | EPI_ISL_3875354 | 2021-09-02      |

| virus_name                  | epiID           | submission_date |
|-----------------------------|-----------------|-----------------|
| hCoV-19/Japan/PG-91365/2021 | EPI_ISL_3875355 | 2021-09-02      |
| hCoV-19/Japan/PG-91366/2021 | EPI_ISL_3875356 | 2021-09-02      |
| hCoV-19/Japan/PG-91367/2021 | EPI_ISL_3875357 | 2021-09-02      |
| hCoV-19/Japan/PG-91368/2021 | EPI_ISL_3875358 | 2021-09-02      |
| hCoV-19/Japan/PG-91369/2021 | EPI_ISL_3875359 | 2021-09-02      |
| hCoV-19/Japan/PG-91370/2021 | EPI_ISL_3875360 | 2021-09-02      |
| hCoV-19/Japan/PG-91371/2021 | EPI_ISL_3875361 | 2021-09-02      |
| hCoV-19/Japan/PG-91372/2021 | EPI_ISL_3875362 | 2021-09-02      |
| hCoV-19/Japan/PG-91373/2021 | EPI_ISL_3875363 | 2021-09-02      |
| hCoV-19/Japan/PG-91374/2021 | EPI_ISL_3875364 | 2021-09-02      |
| hCoV-19/Japan/PG-91375/2021 | EPI_ISL_3875365 | 2021-09-02      |
| hCoV-19/Japan/PG-91376/2021 | EPI_ISL_3875366 | 2021-09-02      |
| hCoV-19/Japan/PG-91377/2021 | EPI_ISL_3875367 | 2021-09-02      |
| hCoV-19/Japan/PG-91378/2021 | EPI_ISL_3875368 | 2021-09-02      |
| hCoV-19/Japan/PG-91379/2021 | EPI_ISL_3875369 | 2021-09-02      |
| hCoV-19/Japan/PG-91380/2021 | EPI_ISL_3875370 | 2021-09-02      |
| hCoV-19/Japan/PG-91381/2021 | EPI_ISL_3875371 | 2021-09-02      |
| hCoV-19/Japan/PG-91382/2021 | EPI_ISL_3875372 | 2021-09-02      |
| hCoV-19/Japan/PG-91383/2021 | EPI_ISL_3875373 | 2021-09-02      |
| hCoV-19/Japan/PG-91384/2021 | EPI_ISL_3875374 | 2021-09-02      |
| hCoV-19/Japan/PG-91385/2021 | EPI_ISL_3875375 | 2021-09-02      |
| hCoV-19/Japan/PG-91386/2021 | EPI_ISL_3875376 | 2021-09-02      |
| hCoV-19/Japan/PG-91387/2021 | EPI_ISL_3875377 | 2021-09-02      |
| hCoV-19/Japan/PG-91388/2021 | EPI_ISL_3875378 | 2021-09-02      |
| hCoV-19/Japan/PG-91389/2021 | EPI_ISL_3875379 | 2021-09-02      |
| hCoV-19/Japan/PG-91390/2021 | EPI_ISL_3875380 | 2021-09-02      |
| hCoV-19/Japan/PG-91393/2021 | EPI_ISL_3875381 | 2021-09-02      |
| hCoV-19/Japan/PG-91394/2021 | EPI_ISL_3875382 | 2021-09-02      |
| hCoV-19/Japan/PG-91395/2021 | EPI_ISL_3875383 | 2021-09-02      |
| hCoV-19/Japan/PG-91396/2021 | EPI_ISL_3875384 | 2021-09-02      |
| hCoV-19/Japan/PG-91397/2021 | EPI_ISL_3875385 | 2021-09-02      |
| hCoV-19/Japan/PG-91398/2021 | EPI_ISL_3875386 | 2021-09-02      |
| hCoV-19/Japan/PG-91399/2021 | EPI_ISL_3875387 | 2021-09-02      |
| hCoV-19/Japan/PG-91400/2021 | EPI_ISL_3875388 | 2021-09-02      |
| hCoV-19/Japan/PG-91401/2021 | EPI_ISL_3875389 | 2021-09-02      |
| hCoV-19/Japan/PG-91402/2021 | EPI_ISL_3875390 | 2021-09-02      |
| hCoV-19/Japan/PG-91403/2021 | EPI_ISL_3875391 | 2021-09-02      |
| hCoV-19/Japan/PG-91404/2021 | EPI_ISL_3875392 | 2021-09-02      |
| hCoV-19/Japan/PG-91405/2021 | EPI_ISL_3875393 | 2021-09-02      |
| hCoV-19/Japan/PG-91406/2021 | EPI_ISL_3875394 | 2021-09-02      |
| hCoV-19/Japan/PG-91407/2021 | EPI_ISL_3875395 | 2021-09-02      |
| hCoV-19/Japan/PG-91408/2021 | EPI_ISL_3875396 | 2021-09-02      |
| hCoV-19/Japan/PG-91409/2021 | EPI_ISL_3875397 | 2021-09-02      |
| hCoV-19/Japan/PG-91410/2021 | EPI_ISL_3875398 | 2021-09-02      |
| hCoV-19/Japan/PG-91411/2021 | EPI_ISL_3875399 | 2021-09-02      |
| hCoV-19/Japan/PG-91412/2021 | EPI_ISL_3875400 | 2021-09-02      |
| hCoV-19/Japan/PG-91413/2021 | EPI_ISL_3875401 | 2021-09-02      |
| hCoV-19/Japan/PG-91414/2021 | EPI_ISL_3875402 | 2021-09-02      |
| hCoV-19/Japan/PG-91415/2021 | EPI_ISL_3875403 | 2021-09-02      |
| hCoV-19/Japan/PG-91416/2021 | EPI_ISL_3875404 | 2021-09-02      |
| hCoV-19/Japan/PG-91417/2021 | EPI_ISL_3875405 | 2021-09-02      |
| hCoV-19/Japan/PG-91418/2021 | EPI_ISL_3875406 | 2021-09-02      |
| hCoV-19/Japan/PG-91419/2021 | EPI_ISL_3875407 | 2021-09-02      |
| hCoV-19/Japan/PG-91420/2021 | EPI_ISL_3875408 | 2021-09-02      |

| virus_name                  | epiID           | submission_date |
|-----------------------------|-----------------|-----------------|
| hCoV-19/Japan/PG-91421/2021 | EPI_ISL_3875409 | 2021-09-02      |
| hCoV-19/Japan/PG-91422/2021 | EPI_ISL_3875410 | 2021-09-02      |
| hCoV-19/Japan/PG-91423/2021 | EPI_ISL_3875411 | 2021-09-02      |
| hCoV-19/Japan/PG-91424/2021 | EPI_ISL_3875412 | 2021-09-02      |
| hCoV-19/Japan/PG-91425/2021 | EPI_ISL_3875413 | 2021-09-02      |
| hCoV-19/Japan/PG-91426/2021 | EPI_ISL_3875414 | 2021-09-02      |
| hCoV-19/Japan/PG-91427/2021 | EPI_ISL_3875416 | 2021-09-02      |
| hCoV-19/Japan/PG-91428/2021 | EPI_ISL_3875418 | 2021-09-02      |
| hCoV-19/Japan/PG-91429/2021 | EPI_ISL_3875421 | 2021-09-02      |
| hCoV-19/Japan/PG-91430/2021 | EPI_ISL_3875425 | 2021-09-02      |
| hCoV-19/Japan/PG-91431/2021 | EPI_ISL_3875428 | 2021-09-02      |
| hCoV-19/Japan/PG-91432/2021 | EPI_ISL_3875432 | 2021-09-02      |
| hCoV-19/Japan/PG-91433/2021 | EPI_ISL_3875436 | 2021-09-02      |
| hCoV-19/Japan/PG-91434/2021 | EPI_ISL_3875439 | 2021-09-02      |
| hCoV-19/Japan/PG-91435/2021 | EPI_ISL_3875443 | 2021-09-02      |
| hCoV-19/Japan/PG-91436/2021 | EPI_ISL_3875446 | 2021-09-02      |
| hCoV-19/Japan/PG-91437/2021 | EPI_ISL_3875450 | 2021-09-02      |
| hCoV-19/Japan/PG-91438/2021 | EPI_ISL_3875453 | 2021-09-02      |
| hCoV-19/Japan/PG-91439/2021 | EPI_ISL_3875456 | 2021-09-02      |
| hCoV-19/Japan/PG-91440/2021 | EPI_ISL_3875457 | 2021-09-02      |
| hCoV-19/Japan/PG-91441/2021 | EPI_ISL_3875458 | 2021-09-02      |
| hCoV-19/Japan/PG-91442/2021 | EPI_ISL_3875459 | 2021-09-02      |
| hCoV-19/Japan/PG-91443/2021 | EPI_ISL_3871707 | 2021-09-02      |
| hCoV-19/Japan/PG-91444/2021 | EPI_ISL_3871708 | 2021-09-02      |
| hCoV-19/Japan/PG-91445/2021 | EPI_ISL_3871709 | 2021-09-02      |
| hCoV-19/Japan/PG-91446/2021 | EPI_ISL_3871710 | 2021-09-02      |
| hCoV-19/Japan/PG-91447/2021 | EPI_ISL_3871711 | 2021-09-02      |
| hCoV-19/Japan/PG-91448/2021 | EPI_ISL_3871712 | 2021-09-02      |
| hCoV-19/Japan/PG-91449/2021 | EPI_ISL_3871713 | 2021-09-02      |
| hCoV-19/Japan/PG-91450/2021 | EPI_ISL_3871714 | 2021-09-02      |
| hCoV-19/Japan/PG-91451/2021 | EPI_ISL_3871715 | 2021-09-02      |
| hCoV-19/Japan/PG-91452/2021 | EPI_ISL_3871716 | 2021-09-02      |
| hCoV-19/Japan/PG-91453/2021 | EPI_ISL_3871717 | 2021-09-02      |
| hCoV-19/Japan/PG-91454/2021 | EPI_ISL_3871718 | 2021-09-02      |
| hCoV-19/Japan/PG-91455/2021 | EPI_ISL_3871719 | 2021-09-02      |
| hCoV-19/Japan/PG-91456/2021 | EPI_ISL_3871720 | 2021-09-02      |
| hCoV-19/Japan/PG-91457/2021 | EPI_ISL_3871721 | 2021-09-02      |
| hCoV-19/Japan/PG-91458/2021 | EPI_ISL_3871722 | 2021-09-02      |
| hCoV-19/Japan/PG-91459/2021 | EPI_ISL_3871723 | 2021-09-02      |
| hCoV-19/Japan/PG-91460/2021 | EPI_ISL_3871724 | 2021-09-02      |
| hCoV-19/Japan/PG-91461/2021 | EPI_ISL_3871725 | 2021-09-02      |
| hCoV-19/Japan/PG-91462/2021 | EPI_ISL_3871726 | 2021-09-02      |
| hCoV-19/Japan/PG-91463/2021 | EPI_ISL_3871727 | 2021-09-02      |
| hCoV-19/Japan/PG-91464/2021 | EPI_ISL_3871728 | 2021-09-02      |
| hCoV-19/Japan/PG-91465/2021 | EPI_ISL_3871729 | 2021-09-02      |
| hCoV-19/Japan/PG-91466/2021 | EPI_ISL_3871730 | 2021-09-02      |
| hCoV-19/Japan/PG-91467/2021 | EPI_ISL_3871731 | 2021-09-02      |
| hCoV-19/Japan/PG-91468/2021 | EPI_ISL_3871732 | 2021-09-02      |
| hCoV-19/Japan/PG-91469/2021 | EPI_ISL_3871733 | 2021-09-02      |
| hCoV-19/Japan/PG-91470/2021 | EPI_ISL_3871734 | 2021-09-02      |
| hCoV-19/Japan/PG-91471/2021 | EPI_ISL_3871735 | 2021-09-02      |
| hCoV-19/Japan/PG-91472/2021 | EPI_ISL_3871736 | 2021-09-02      |
| hCoV-19/Japan/PG-91473/2021 | EPI_ISL_3871737 | 2021-09-02      |
| hCoV-19/Japan/PG-91474/2021 | EPI_ISL_3871738 | 2021-09-02      |

| virus_name                  | epiID           | submission_date |
|-----------------------------|-----------------|-----------------|
| hCoV-19/Japan/PG-91475/2021 | EPI_ISL_3871739 | 2021-09-02      |
| hCoV-19/Japan/PG-91476/2021 | EPI_ISL_3871740 | 2021-09-02      |
| hCoV-19/Japan/PG-91477/2021 | EPI_ISL_3871741 | 2021-09-02      |
| hCoV-19/Japan/PG-91478/2021 | EPI_ISL_3871742 | 2021-09-02      |
| hCoV-19/Japan/PG-91479/2021 | EPI_ISL_3871743 | 2021-09-02      |
| hCoV-19/Japan/PG-91480/2021 | EPI_ISL_3871744 | 2021-09-02      |
| hCoV-19/Japan/PG-91481/2021 | EPI_ISL_3871745 | 2021-09-02      |
| hCoV-19/Japan/PG-91496/2021 | EPI_ISL_3876256 | 2021-09-02      |
| hCoV-19/Japan/PG-91497/2021 | EPI_ISL_3876257 | 2021-09-02      |
| hCoV-19/Japan/PG-91498/2021 | EPI_ISL_3876258 | 2021-09-02      |
| hCoV-19/Japan/PG-91513/2021 | EPI_ISL_3875926 | 2021-09-02      |
| hCoV-19/Japan/PG-91514/2021 | EPI_ISL_3875927 | 2021-09-02      |
| hCoV-19/Japan/PG-91515/2021 | EPI_ISL_3875928 | 2021-09-02      |
| hCoV-19/Japan/PG-91516/2021 | EPI_ISL_3875929 | 2021-09-02      |
| hCoV-19/Japan/PG-91517/2021 | EPI_ISL_3875930 | 2021-09-02      |
| hCoV-19/Japan/PG-91518/2021 | EPI_ISL_3875931 | 2021-09-02      |
| hCoV-19/Japan/PG-91519/2021 | EPI_ISL_3875932 | 2021-09-02      |
| hCoV-19/Japan/PG-91520/2021 | EPI_ISL_3875933 | 2021-09-02      |
| hCoV-19/Japan/PG-91521/2021 | EPI_ISL_3875934 | 2021-09-02      |
| hCoV-19/Japan/PG-91522/2021 | EPI_ISL_3875935 | 2021-09-02      |
| hCoV-19/Japan/PG-91523/2021 | EPI_ISL_3875936 | 2021-09-02      |
| hCoV-19/Japan/PG-91524/2021 | EPI_ISL_3875937 | 2021-09-02      |
| hCoV-19/Japan/PG-91525/2021 | EPI_ISL_3875938 | 2021-09-02      |
| hCoV-19/Japan/PG-91526/2021 | EPI_ISL_3875939 | 2021-09-02      |
| hCoV-19/Japan/PG-91527/2021 | EPI_ISL_3875940 | 2021-09-02      |
| hCoV-19/Japan/PG-91528/2021 | EPI_ISL_3875941 | 2021-09-02      |
| hCoV-19/Japan/PG-91529/2021 | EPI_ISL_3875942 | 2021-09-02      |
| hCoV-19/Japan/PG-91530/2021 | EPI_ISL_3875943 | 2021-09-02      |
| hCoV-19/Japan/PG-91531/2021 | EPI_ISL_3875944 | 2021-09-02      |
| hCoV-19/Japan/PG-91532/2021 | EPI_ISL_3875945 | 2021-09-02      |
| hCoV-19/Japan/PG-91533/2021 | EPI_ISL_3875946 | 2021-09-02      |
| hCoV-19/Japan/PG-91534/2021 | EPI_ISL_3875947 | 2021-09-02      |
| hCoV-19/Japan/PG-91535/2021 | EPI_ISL_3875948 | 2021-09-02      |
| hCoV-19/Japan/PG-91536/2021 | EPI_ISL_3875949 | 2021-09-02      |
| hCoV-19/Japan/PG-91537/2021 | EPI_ISL_3875950 | 2021-09-02      |
| hCoV-19/Japan/PG-91538/2021 | EPI_ISL_3875951 | 2021-09-02      |
| hCoV-19/Japan/PG-91539/2021 | EPI_ISL_3875952 | 2021-09-02      |
| hCoV-19/Japan/PG-91540/2021 | EPI_ISL_3875953 | 2021-09-02      |
| hCoV-19/Japan/PG-91545/2021 | EPI_ISL_3875954 | 2021-09-02      |
| hCoV-19/Japan/PG-91628/2021 | EPI_ISL_3873274 | 2021-09-02      |
| hCoV-19/Japan/PG-91629/2021 | EPI_ISL_3873275 | 2021-09-02      |
| hCoV-19/Japan/PG-91630/2021 | EPI_ISL_3873276 | 2021-09-02      |
| hCoV-19/Japan/PG-91631/2021 | EPI_ISL_3873277 | 2021-09-02      |
| hCoV-19/Japan/PG-91632/2021 | EPI_ISL_3873278 | 2021-09-02      |
| hCoV-19/Japan/PG-91633/2021 | EPI_ISL_3873279 | 2021-09-02      |
| hCoV-19/Japan/PG-91634/2021 | EPI_ISL_3873280 | 2021-09-02      |
| hCoV-19/Japan/PG-91642/2021 | EPI_ISL_3873281 | 2021-09-02      |
| hCoV-19/Japan/PG-91643/2021 | EPI_ISL_3873282 | 2021-09-02      |
| hCoV-19/Japan/PG-91644/2021 | EPI_ISL_3873283 | 2021-09-02      |
| hCoV-19/Japan/PG-91645/2021 | EPI_ISL_3873284 | 2021-09-02      |
| hCoV-19/Japan/PG-91663/2021 | EPI_ISL_3873285 | 2021-09-02      |
| hCoV-19/Japan/PG-91664/2021 | EPI_ISL_3873286 | 2021-09-02      |
| hCoV-19/Japan/PG-91665/2021 | EPI_ISL_3873287 | 2021-09-02      |
| hCoV-19/Japan/PG-91666/2021 | EPI_ISL_3873288 | 2021-09-02      |

| virus_name                  | epiID           | submission_date |
|-----------------------------|-----------------|-----------------|
| hCoV-19/Japan/PG-91667/2021 | EPI_ISL_3873289 | 2021-09-02      |
| hCoV-19/Japan/PG-91668/2021 | EPI_ISL_3873290 | 2021-09-02      |
| hCoV-19/Japan/PG-91704/2021 | EPI_ISL_3873291 | 2021-09-02      |
| hCoV-19/Japan/PG-91705/2021 | EPI_ISL_3873292 | 2021-09-02      |
| hCoV-19/Japan/PG-91741/2021 | EPI_ISL_3874087 | 2021-09-02      |
| hCoV-19/Japan/PG-91742/2021 | EPI_ISL_3874088 | 2021-09-02      |
| hCoV-19/Japan/PG-91743/2021 | EPI_ISL_3874089 | 2021-09-02      |
| hCoV-19/Japan/PG-91744/2021 | EPI_ISL_3874090 | 2021-09-02      |
| hCoV-19/Japan/PG-91745/2021 | EPI_ISL_3874091 | 2021-09-02      |
| hCoV-19/Japan/PG-91746/2021 | EPI_ISL_3874092 | 2021-09-02      |
| hCoV-19/Japan/PG-91747/2021 | EPI_ISL_3874093 | 2021-09-02      |
| hCoV-19/Japan/PG-91748/2021 | EPI_ISL_3874094 | 2021-09-02      |
| hCoV-19/Japan/PG-91749/2021 | EPI_ISL_3874097 | 2021-09-02      |
| hCoV-19/Japan/PG-91750/2021 | EPI_ISL_3874100 | 2021-09-02      |
| hCoV-19/Japan/PG-91751/2021 | EPI_ISL_3874103 | 2021-09-02      |
| hCoV-19/Japan/PG-91752/2021 | EPI_ISL_3874105 | 2021-09-02      |
| hCoV-19/Japan/PG-91753/2021 | EPI_ISL_3874108 | 2021-09-02      |
| hCoV-19/Japan/PG-91754/2021 | EPI_ISL_3874111 | 2021-09-02      |
| hCoV-19/Japan/PG-91755/2021 | EPI_ISL_3874113 | 2021-09-02      |
| hCoV-19/Japan/PG-91756/2021 | EPI_ISL_3874116 | 2021-09-02      |
| hCoV-19/Japan/PG-91757/2021 | EPI_ISL_3874118 | 2021-09-02      |
| hCoV-19/Japan/PG-91758/2021 | EPI_ISL_3874119 | 2021-09-02      |
| hCoV-19/Japan/PG-91759/2021 | EPI_ISL_3874120 | 2021-09-02      |
| hCoV-19/Japan/PG-91760/2021 | EPI_ISL_3874121 | 2021-09-02      |
| hCoV-19/Japan/PG-91761/2021 | EPI_ISL_3874122 | 2021-09-02      |
| hCoV-19/Japan/PG-91762/2021 | EPI_ISL_3874123 | 2021-09-02      |
| hCoV-19/Japan/PG-91763/2021 | EPI_ISL_3874124 | 2021-09-02      |
| hCoV-19/Japan/PG-91764/2021 | EPI_ISL_3874125 | 2021-09-02      |
| hCoV-19/Japan/PG-91765/2021 | EPI_ISL_3874126 | 2021-09-02      |
| hCoV-19/Japan/PG-91766/2021 | EPI_ISL_3874127 | 2021-09-02      |
| hCoV-19/Japan/PG-91767/2021 | EPI_ISL_3874128 | 2021-09-02      |
| hCoV-19/Japan/PG-91768/2021 | EPI_ISL_3874129 | 2021-09-02      |
| hCoV-19/Japan/PG-91769/2021 | EPI_ISL_3874130 | 2021-09-02      |
| hCoV-19/Japan/PG-91770/2021 | EPI_ISL_3874131 | 2021-09-02      |
| hCoV-19/Japan/PG-91771/2021 | EPI_ISL_3874132 | 2021-09-02      |
| hCoV-19/Japan/PG-91785/2021 | EPI_ISL_3871359 | 2021-09-02      |
| hCoV-19/Japan/PG-91791/2021 | EPI_ISL_3871360 | 2021-09-02      |
| hCoV-19/Japan/PG-91792/2021 | EPI_ISL_3871361 | 2021-09-02      |
| hCoV-19/Japan/PG-91794/2021 | EPI_ISL_3871362 | 2021-09-02      |
| hCoV-19/Japan/PG-91795/2021 | EPI_ISL_3871363 | 2021-09-02      |
| hCoV-19/Japan/PG-91796/2021 | EPI_ISL_3874066 | 2021-09-02      |
| hCoV-19/Japan/PG-91797/2021 | EPI_ISL_3874067 | 2021-09-02      |
| hCoV-19/Japan/PG-91798/2021 | EPI_ISL_3874068 | 2021-09-02      |
| hCoV-19/Japan/PG-91799/2021 | EPI_ISL_3874069 | 2021-09-02      |
| hCoV-19/Japan/PG-91800/2021 | EPI_ISL_3874070 | 2021-09-02      |
| hCoV-19/Japan/PG-91801/2021 | EPI_ISL_3874071 | 2021-09-02      |
| hCoV-19/Japan/PG-91802/2021 | EPI_ISL_3874072 | 2021-09-02      |
| hCoV-19/Japan/PG-91803/2021 | EPI_ISL_3874073 | 2021-09-02      |
| hCoV-19/Japan/PG-91815/2021 | EPI_ISL_3874074 | 2021-09-02      |
| hCoV-19/Japan/PG-91816/2021 | EPI_ISL_3874075 | 2021-09-02      |
| hCoV-19/Japan/PG-91882/2021 | EPI_ISL_3874251 | 2021-09-02      |
| hCoV-19/Japan/PG-91883/2021 | EPI_ISL_3874252 | 2021-09-02      |
| hCoV-19/Japan/PG-91884/2021 | EPI_ISL_3874253 | 2021-09-02      |
| hCoV-19/Japan/PG-91885/2021 | EPI_ISL_3874254 | 2021-09-02      |

| virus_name                  | epiID           | submission_date |
|-----------------------------|-----------------|-----------------|
| hCoV-19/Japan/PG-91886/2021 | EPI_ISL_3874255 | 2021-09-02      |
| hCoV-19/Japan/PG-91887/2021 | EPI_ISL_3874256 | 2021-09-02      |
| hCoV-19/Japan/PG-91891/2021 | EPI_ISL_3872347 | 2021-09-02      |
| hCoV-19/Japan/PG-91898/2021 | EPI_ISL_3872348 | 2021-09-02      |
| hCoV-19/Japan/PG-91901/2021 | EPI_ISL_3872349 | 2021-09-02      |
| hCoV-19/Japan/PG-91905/2021 | EPI_ISL_3872350 | 2021-09-02      |
| hCoV-19/Japan/PG-91907/2021 | EPI_ISL_3872351 | 2021-09-02      |
| hCoV-19/Japan/PG-91908/2021 | EPI_ISL_3872352 | 2021-09-02      |
| hCoV-19/Japan/PG-91910/2021 | EPI_ISL_3872353 | 2021-09-02      |
| hCoV-19/Japan/PG-91917/2021 | EPI_ISL_3872354 | 2021-09-02      |
| hCoV-19/Japan/PG-91918/2021 | EPI_ISL_3872355 | 2021-09-02      |
| hCoV-19/Japan/PG-91919/2021 | EPI_ISL_3902086 | 2021-09-02      |
| hCoV-19/Japan/PG-91920/2021 | EPI_ISL_3902090 | 2021-09-02      |
| hCoV-19/Japan/PG-91921/2021 | EPI_ISL_3902093 | 2021-09-02      |
| hCoV-19/Japan/PG-91922/2021 | EPI_ISL_3902096 | 2021-09-02      |
| hCoV-19/Japan/PG-91923/2021 | EPI_ISL_3902100 | 2021-09-02      |
| hCoV-19/Japan/PG-91924/2021 | EPI_ISL_3902103 | 2021-09-02      |
| hCoV-19/Japan/PG-91925/2021 | EPI_ISL_3902106 | 2021-09-02      |
| hCoV-19/Japan/PG-91926/2021 | EPI_ISL_3902107 | 2021-09-02      |
| hCoV-19/Japan/PG-91928/2021 | EPI_ISL_3902108 | 2021-09-02      |
| hCoV-19/Japan/PG-91931/2021 | EPI_ISL_3902109 | 2021-09-02      |
| hCoV-19/Japan/PG-91932/2021 | EPI_ISL_3902111 | 2021-09-02      |
| hCoV-19/Japan/PG-91933/2021 | EPI_ISL_3902112 | 2021-09-02      |
| hCoV-19/Japan/PG-91934/2021 | EPI_ISL_3902113 | 2021-09-02      |
| hCoV-19/Japan/PG-91935/2021 | EPI_ISL_3902116 | 2021-09-02      |
| hCoV-19/Japan/PG-91936/2021 | EPI_ISL_3902119 | 2021-09-02      |
| hCoV-19/Japan/PG-91937/2021 | EPI_ISL_3902122 | 2021-09-02      |
| hCoV-19/Japan/PG-91938/2021 | EPI_ISL_3902125 | 2021-09-02      |
| hCoV-19/Japan/PG-91939/2021 | EPI_ISL_3902128 | 2021-09-02      |
| hCoV-19/Japan/PG-91940/2021 | EPI_ISL_3902130 | 2021-09-02      |
| hCoV-19/Japan/PG-91941/2021 | EPI_ISL_3902133 | 2021-09-02      |
| hCoV-19/Japan/PG-91942/2021 | EPI_ISL_3902136 | 2021-09-02      |
| hCoV-19/Japan/PG-91943/2021 | EPI_ISL_3902139 | 2021-09-02      |
| hCoV-19/Japan/PG-91944/2021 | EPI_ISL_3902142 | 2021-09-02      |
| hCoV-19/Japan/PG-91945/2021 | EPI_ISL_3902146 | 2021-09-02      |
| hCoV-19/Japan/PG-91946/2021 | EPI_ISL_3902148 | 2021-09-02      |
| hCoV-19/Japan/PG-91947/2021 | EPI_ISL_3902151 | 2021-09-02      |
| hCoV-19/Japan/PG-91948/2021 | EPI_ISL_3902154 | 2021-09-02      |
| hCoV-19/Japan/PG-91949/2021 | EPI_ISL_3902157 | 2021-09-02      |
| hCoV-19/Japan/PG-91950/2021 | EPI_ISL_3902161 | 2021-09-02      |
| hCoV-19/Japan/PG-91951/2021 | EPI_ISL_3902163 | 2021-09-02      |
| hCoV-19/Japan/PG-91952/2021 | EPI_ISL_3902167 | 2021-09-02      |
| hCoV-19/Japan/PG-91953/2021 | EPI_ISL_3902170 | 2021-09-02      |
| hCoV-19/Japan/PG-91954/2021 | EPI_ISL_3902171 | 2021-09-02      |
| hCoV-19/Japan/PG-91955/2021 | EPI_ISL_3902172 | 2021-09-02      |
| hCoV-19/Japan/PG-91956/2021 | EPI_ISL_3902174 | 2021-09-02      |
| hCoV-19/Japan/PG-91957/2021 | EPI_ISL_3902177 | 2021-09-02      |
| hCoV-19/Japan/PG-91958/2021 | EPI_ISL_3902180 | 2021-09-02      |
| hCoV-19/Japan/PG-91966/2021 | EPI_ISL_3902183 | 2021-09-02      |
| hCoV-19/Japan/PG-91967/2021 | EPI_ISL_3902186 | 2021-09-02      |
| hCoV-19/Japan/PG-91968/2021 | EPI_ISL_3902189 | 2021-09-02      |
| hCoV-19/Japan/PG-91969/2021 | EPI_ISL_3902192 | 2021-09-02      |
| hCoV-19/Japan/PG-91970/2021 | EPI_ISL_3902195 | 2021-09-02      |
| hCoV-19/Japan/PG-91971/2021 | EPI_ISL_3902199 | 2021-09-02      |

| virus_name                  | epiID           | submission_date |
|-----------------------------|-----------------|-----------------|
| hCoV-19/Japan/PG-91972/2021 | EPI_ISL_3902202 | 2021-09-02      |
| hCoV-19/Japan/PG-91973/2021 | EPI_ISL_3902205 | 2021-09-02      |
| hCoV-19/Japan/PG-91974/2021 | EPI_ISL_3902209 | 2021-09-02      |
| hCoV-19/Japan/PG-91975/2021 | EPI_ISL_3902212 | 2021-09-02      |
| hCoV-19/Japan/PG-91976/2021 | EPI_ISL_3902216 | 2021-09-02      |
| hCoV-19/Japan/PG-91977/2021 | EPI_ISL_3902217 | 2021-09-02      |
| hCoV-19/Japan/PG-91978/2021 | EPI_ISL_3902218 | 2021-09-02      |
| hCoV-19/Japan/PG-91979/2021 | EPI_ISL_3902220 | 2021-09-02      |
| hCoV-19/Japan/PG-91980/2021 | EPI_ISL_3902221 | 2021-09-02      |
| hCoV-19/Japan/PG-91981/2021 | EPI_ISL_3902222 | 2021-09-02      |
| hCoV-19/Japan/PG-91982/2021 | EPI_ISL_3902224 | 2021-09-02      |
| hCoV-19/Japan/PG-91983/2021 | EPI_ISL_3902225 | 2021-09-02      |
| hCoV-19/Japan/PG-91984/2021 | EPI_ISL_3902227 | 2021-09-02      |
| hCoV-19/Japan/PG-91985/2021 | EPI_ISL_3902228 | 2021-09-02      |
| hCoV-19/Japan/PG-91986/2021 | EPI_ISL_3902229 | 2021-09-02      |
| hCoV-19/Japan/PG-91987/2021 | EPI_ISL_3902232 | 2021-09-02      |
| hCoV-19/Japan/PG-91988/2021 | EPI_ISL_3902234 | 2021-09-02      |
| hCoV-19/Japan/PG-91989/2021 | EPI_ISL_3902238 | 2021-09-02      |
| hCoV-19/Japan/PG-91990/2021 | EPI_ISL_3902241 | 2021-09-02      |
| hCoV-19/Japan/PG-91991/2021 | EPI_ISL_3902245 | 2021-09-02      |
| hCoV-19/Japan/PG-91992/2021 | EPI_ISL_3902248 | 2021-09-02      |
| hCoV-19/Japan/PG-91993/2021 | EPI_ISL_3902251 | 2021-09-02      |
| hCoV-19/Japan/PG-91994/2021 | EPI_ISL_3902255 | 2021-09-02      |
| hCoV-19/Japan/PG-91995/2021 | EPI_ISL_3902258 | 2021-09-02      |
| hCoV-19/Japan/PG-91996/2021 | EPI_ISL_3902262 | 2021-09-02      |
| hCoV-19/Japan/PG-91997/2021 | EPI_ISL_3902265 | 2021-09-02      |
| hCoV-19/Japan/PG-91998/2021 | EPI_ISL_3902269 | 2021-09-02      |
| hCoV-19/Japan/PG-91999/2021 | EPI_ISL_3902272 | 2021-09-02      |
| hCoV-19/Japan/PG-92000/2021 | EPI_ISL_3902276 | 2021-09-02      |
| hCoV-19/Japan/PG-92001/2021 | EPI_ISL_3902279 | 2021-09-02      |
| hCoV-19/Japan/PG-92002/2021 | EPI_ISL_3902283 | 2021-09-02      |
| hCoV-19/Japan/PG-92003/2021 | EPI_ISL_3902286 | 2021-09-02      |
| hCoV-19/Japan/PG-92004/2021 | EPI_ISL_3902287 | 2021-09-02      |
| hCoV-19/Japan/PG-92005/2021 | EPI_ISL_3902288 | 2021-09-02      |
| hCoV-19/Japan/PG-92006/2021 | EPI_ISL_3902290 | 2021-09-02      |
| hCoV-19/Japan/PG-92007/2021 | EPI_ISL_3902291 | 2021-09-02      |
| hCoV-19/Japan/PG-92008/2021 | EPI_ISL_3902292 | 2021-09-02      |
| hCoV-19/Japan/PG-92009/2021 | EPI_ISL_3902294 | 2021-09-02      |
| hCoV-19/Japan/PG-92010/2021 | EPI_ISL_3902295 | 2021-09-02      |
| hCoV-19/Japan/PG-92011/2021 | EPI_ISL_3902296 | 2021-09-02      |
| hCoV-19/Japan/PG-92012/2021 | EPI_ISL_3902299 | 2021-09-02      |
| hCoV-19/Japan/PG-92013/2021 | EPI_ISL_3902302 | 2021-09-02      |
| hCoV-19/Japan/PG-92014/2021 | EPI_ISL_3902305 | 2021-09-02      |
| hCoV-19/Japan/PG-92015/2021 | EPI_ISL_3902309 | 2021-09-02      |
| hCoV-19/Japan/PG-92016/2021 | EPI_ISL_3902311 | 2021-09-02      |
| hCoV-19/Japan/PG-92017/2021 | EPI_ISL_3902313 | 2021-09-02      |
| hCoV-19/Japan/PG-92018/2021 | EPI_ISL_3902316 | 2021-09-02      |
| hCoV-19/Japan/PG-92019/2021 | EPI_ISL_3902319 | 2021-09-02      |
| hCoV-19/Japan/PG-92020/2021 | EPI_ISL_3902322 | 2021-09-02      |
| hCoV-19/Japan/PG-92021/2021 | EPI_ISL_3902325 | 2021-09-02      |
| hCoV-19/Japan/PG-92022/2021 | EPI_ISL_3902328 | 2021-09-02      |
| hCoV-19/Japan/PG-92023/2021 | EPI_ISL_3902329 | 2021-09-02      |
| hCoV-19/Japan/PG-92024/2021 | EPI_ISL_3902330 | 2021-09-02      |
| hCoV-19/Japan/PG-92025/2021 | EPI_ISL_3902332 | 2021-09-02      |



| virus_name                  | epiID           | submission_date |
|-----------------------------|-----------------|-----------------|
| hCoV-19/Japan/PG-92026/2021 | EPI_ISL_3902333 | 2021-09-02      |
| hCoV-19/Japan/PG-92027/2021 | EPI_ISL_3902334 | 2021-09-02      |
| hCoV-19/Japan/PG-92028/2021 | EPI_ISL_3902336 | 2021-09-02      |
| hCoV-19/Japan/PG-92052/2021 | EPI_ISL_3902337 | 2021-09-02      |
| hCoV-19/Japan/PG-92053/2021 | EPI_ISL_3902338 | 2021-09-02      |
| hCoV-19/Japan/PG-92054/2021 | EPI_ISL_3902340 | 2021-09-02      |
| hCoV-19/Japan/PG-92055/2021 | EPI_ISL_3902341 | 2021-09-02      |
| hCoV-19/Japan/PG-92056/2021 | EPI_ISL_3902342 | 2021-09-02      |
| hCoV-19/Japan/PG-92057/2021 | EPI_ISL_3902345 | 2021-09-02      |
| hCoV-19/Japan/PG-92058/2021 | EPI_ISL_3902348 | 2021-09-02      |
| hCoV-19/Japan/PG-92059/2021 | EPI_ISL_3902351 | 2021-09-02      |
| hCoV-19/Japan/PG-92060/2021 | EPI_ISL_3902354 | 2021-09-02      |
| hCoV-19/Japan/PG-92061/2021 | EPI_ISL_3902358 | 2021-09-02      |
| hCoV-19/Japan/PG-92062/2021 | EPI_ISL_3902361 | 2021-09-02      |
| hCoV-19/Japan/PG-92063/2021 | EPI_ISL_3902364 | 2021-09-02      |
| hCoV-19/Japan/PG-92064/2021 | EPI_ISL_3902367 | 2021-09-02      |
| hCoV-19/Japan/PG-92065/2021 | EPI_ISL_3902370 | 2021-09-02      |
| hCoV-19/Japan/PG-92066/2021 | EPI_ISL_3902373 | 2021-09-02      |
| hCoV-19/Japan/PG-92067/2021 | EPI_ISL_3902376 | 2021-09-02      |
| hCoV-19/Japan/PG-92068/2021 | EPI_ISL_3902379 | 2021-09-02      |
| hCoV-19/Japan/PG-92069/2021 | EPI_ISL_3902383 | 2021-09-02      |
| hCoV-19/Japan/PG-92070/2021 | EPI_ISL_3902386 | 2021-09-02      |
| hCoV-19/Japan/PG-92071/2021 | EPI_ISL_3902389 | 2021-09-02      |
| hCoV-19/Japan/PG-92072/2021 | EPI_ISL_3902392 | 2021-09-02      |
| hCoV-19/Japan/PG-92073/2021 | EPI_ISL_3902395 | 2021-09-02      |
| hCoV-19/Japan/PG-92074/2021 | EPI_ISL_3902398 | 2021-09-02      |
| hCoV-19/Japan/PG-92075/2021 | EPI_ISL_3902402 | 2021-09-02      |
| hCoV-19/Japan/PG-92076/2021 | EPI_ISL_3902404 | 2021-09-02      |
| hCoV-19/Japan/PG-92077/2021 | EPI_ISL_3902408 | 2021-09-02      |
| hCoV-19/Japan/PG-92078/2021 | EPI_ISL_3902410 | 2021-09-02      |
| hCoV-19/Japan/PG-92079/2021 | EPI_ISL_3902414 | 2021-09-02      |
| hCoV-19/Japan/PG-92080/2021 | EPI_ISL_3902416 | 2021-09-02      |
| hCoV-19/Japan/PG-92081/2021 | EPI_ISL_3902420 | 2021-09-02      |
| hCoV-19/Japan/PG-92082/2021 | EPI_ISL_3902423 | 2021-09-02      |
| hCoV-19/Japan/PG-92083/2021 | EPI_ISL_3902426 | 2021-09-02      |
| hCoV-19/Japan/PG-92084/2021 | EPI_ISL_3902429 | 2021-09-02      |
| hCoV-19/Japan/PG-92085/2021 | EPI_ISL_3902432 | 2021-09-02      |
| hCoV-19/Japan/PG-92086/2021 | EPI_ISL_3902436 | 2021-09-02      |
| hCoV-19/Japan/PG-92087/2021 | EPI_ISL_3902439 | 2021-09-02      |
| hCoV-19/Japan/PG-92088/2021 | EPI_ISL_3902442 | 2021-09-02      |
| hCoV-19/Japan/PG-92089/2021 | EPI_ISL_3902446 | 2021-09-02      |
| hCoV-19/Japan/PG-92090/2021 | EPI_ISL_3902449 | 2021-09-02      |
| hCoV-19/Japan/PG-92091/2021 | EPI_ISL_3902452 | 2021-09-02      |
| hCoV-19/Japan/PG-92092/2021 | EPI_ISL_3902455 | 2021-09-02      |
| hCoV-19/Japan/PG-92093/2021 | EPI_ISL_3902458 | 2021-09-02      |
| hCoV-19/Japan/PG-92094/2021 | EPI_ISL_3902462 | 2021-09-02      |
| hCoV-19/Japan/PG-92095/2021 | EPI_ISL_3902465 | 2021-09-02      |
| hCoV-19/Japan/PG-92096/2021 | EPI_ISL_3902468 | 2021-09-02      |
| hCoV-19/Japan/PG-92097/2021 | EPI_ISL_3902471 | 2021-09-02      |
| hCoV-19/Japan/PG-92113/2021 | EPI_ISL_3902475 | 2021-09-02      |
| hCoV-19/Japan/PG-92114/2021 | EPI_ISL_3902478 | 2021-09-02      |
| hCoV-19/Japan/PG-92115/2021 | EPI_ISL_3902481 | 2021-09-02      |
| hCoV-19/Japan/PG-92116/2021 | EPI_ISL_3902484 | 2021-09-02      |
| hCoV-19/Japan/PG-92117/2021 | EPI_ISL_3902487 | 2021-09-02      |

| virus_name                  | epiID           | submission_date |
|-----------------------------|-----------------|-----------------|
| hCoV-19/Japan/PG-92118/2021 | EPI_ISL_3902491 | 2021-09-02      |
| hCoV-19/Japan/PG-92119/2021 | EPI_ISL_3902494 | 2021-09-02      |
| hCoV-19/Japan/PG-92120/2021 | EPI_ISL_3902497 | 2021-09-02      |
| hCoV-19/Japan/PG-92121/2021 | EPI_ISL_3902500 | 2021-09-02      |
| hCoV-19/Japan/PG-92122/2021 | EPI_ISL_3902504 | 2021-09-02      |
| hCoV-19/Japan/PG-92123/2021 | EPI_ISL_3902507 | 2021-09-02      |
| hCoV-19/Japan/PG-92124/2021 | EPI_ISL_3902510 | 2021-09-02      |
| hCoV-19/Japan/PG-92127/2021 | EPI_ISL_3902514 | 2021-09-02      |
| hCoV-19/Japan/PG-92128/2021 | EPI_ISL_3902517 | 2021-09-02      |
| hCoV-19/Japan/PG-92129/2021 | EPI_ISL_3902520 | 2021-09-02      |
| hCoV-19/Japan/PG-92130/2021 | EPI_ISL_3902523 | 2021-09-02      |
| hCoV-19/Japan/PG-92131/2021 | EPI_ISL_3902526 | 2021-09-02      |
| hCoV-19/Japan/PG-92132/2021 | EPI_ISL_3902529 | 2021-09-02      |
| hCoV-19/Japan/PG-92133/2021 | EPI_ISL_3902532 | 2021-09-02      |
| hCoV-19/Japan/PG-92134/2021 | EPI_ISL_3902535 | 2021-09-02      |
| hCoV-19/Japan/PG-92135/2021 | EPI_ISL_3902539 | 2021-09-02      |
| hCoV-19/Japan/PG-92136/2021 | EPI_ISL_3902542 | 2021-09-02      |
| hCoV-19/Japan/PG-92137/2021 | EPI_ISL_3902545 | 2021-09-02      |
| hCoV-19/Japan/PG-92138/2021 | EPI_ISL_3902548 | 2021-09-02      |
| hCoV-19/Japan/PG-92139/2021 | EPI_ISL_3902551 | 2021-09-02      |
| hCoV-19/Japan/PG-92140/2021 | EPI_ISL_3902553 | 2021-09-02      |
| hCoV-19/Japan/PG-92141/2021 | EPI_ISL_3902557 | 2021-09-02      |
| hCoV-19/Japan/PG-92142/2021 | EPI_ISL_3902558 | 2021-09-02      |
| hCoV-19/Japan/PG-92168/2021 | EPI_ISL_3902562 | 2021-09-02      |
| hCoV-19/Japan/PG-92169/2021 | EPI_ISL_3902565 | 2021-09-02      |
| hCoV-19/Japan/PG-92170/2021 | EPI_ISL_3902568 | 2021-09-02      |
| hCoV-19/Japan/PG-92171/2021 | EPI_ISL_3902571 | 2021-09-02      |
| hCoV-19/Japan/PG-92172/2021 | EPI_ISL_3902575 | 2021-09-02      |
| hCoV-19/Japan/PG-92173/2021 | EPI_ISL_3902577 | 2021-09-02      |
| hCoV-19/Japan/PG-92174/2021 | EPI_ISL_3902581 | 2021-09-02      |
| hCoV-19/Japan/PG-92175/2021 | EPI_ISL_3902584 | 2021-09-02      |
| hCoV-19/Japan/PG-92176/2021 | EPI_ISL_3902587 | 2021-09-02      |
| hCoV-19/Japan/PG-92177/2021 | EPI_ISL_3902590 | 2021-09-02      |
| hCoV-19/Japan/PG-92178/2021 | EPI_ISL_3902593 | 2021-09-02      |
| hCoV-19/Japan/PG-92179/2021 | EPI_ISL_3902596 | 2021-09-02      |
| hCoV-19/Japan/PG-92180/2021 | EPI_ISL_3902598 | 2021-09-02      |
| hCoV-19/Japan/PG-92181/2021 | EPI_ISL_3902602 | 2021-09-02      |
| hCoV-19/Japan/PG-92182/2021 | EPI_ISL_3902605 | 2021-09-02      |
| hCoV-19/Japan/PG-92183/2021 | EPI_ISL_3902608 | 2021-09-02      |
| hCoV-19/Japan/PG-92184/2021 | EPI_ISL_3902610 | 2021-09-02      |
| hCoV-19/Japan/PG-92185/2021 | EPI_ISL_3902614 | 2021-09-02      |
| hCoV-19/Japan/PG-92186/2021 | EPI_ISL_3902616 | 2021-09-02      |
| hCoV-19/Japan/PG-92187/2021 | EPI_ISL_3902619 | 2021-09-02      |
| hCoV-19/Japan/PG-92188/2021 | EPI_ISL_3902623 | 2021-09-02      |
| hCoV-19/Japan/PG-92189/2021 | EPI_ISL_3902626 | 2021-09-02      |
| hCoV-19/Japan/PG-92190/2021 | EPI_ISL_3902629 | 2021-09-02      |
| hCoV-19/Japan/PG-92191/2021 | EPI_ISL_3902632 | 2021-09-02      |
| hCoV-19/Japan/PG-92192/2021 | EPI_ISL_3902635 | 2021-09-02      |
| hCoV-19/Japan/PG-92193/2021 | EPI_ISL_3902638 | 2021-09-02      |
| hCoV-19/Japan/PG-92194/2021 | EPI_ISL_3902641 | 2021-09-02      |
| hCoV-19/Japan/PG-92195/2021 | EPI_ISL_3902645 | 2021-09-02      |
| hCoV-19/Japan/PG-92196/2021 | EPI_ISL_3902648 | 2021-09-02      |
| hCoV-19/Japan/PG-92197/2021 | EPI_ISL_3902651 | 2021-09-02      |
| hCoV-19/Japan/PG-92198/2021 | EPI_ISL_3902654 | 2021-09-02      |

| virus_name                  | epiID           | submission_date |
|-----------------------------|-----------------|-----------------|
| hCoV-19/Japan/PG-92199/2021 | EPI_ISL_3902657 | 2021-09-02      |
| hCoV-19/Japan/PG-92200/2021 | EPI_ISL_3902661 | 2021-09-02      |
| hCoV-19/Japan/PG-92201/2021 | EPI_ISL_3902664 | 2021-09-02      |
| hCoV-19/Japan/PG-92202/2021 | EPI_ISL_3902667 | 2021-09-02      |
| hCoV-19/Japan/PG-92203/2021 | EPI_ISL_3902670 | 2021-09-02      |
| hCoV-19/Japan/PG-92204/2021 | EPI_ISL_3902673 | 2021-09-02      |
| hCoV-19/Japan/PG-92205/2021 | EPI_ISL_3902676 | 2021-09-02      |
| hCoV-19/Japan/PG-92206/2021 | EPI_ISL_3902680 | 2021-09-02      |
| hCoV-19/Japan/PG-92207/2021 | EPI_ISL_3902682 | 2021-09-02      |
| hCoV-19/Japan/PG-92208/2021 | EPI_ISL_3902686 | 2021-09-02      |
| hCoV-19/Japan/PG-92209/2021 | EPI_ISL_3902689 | 2021-09-02      |
| hCoV-19/Japan/PG-92210/2021 | EPI_ISL_3902692 | 2021-09-02      |
| hCoV-19/Japan/PG-92211/2021 | EPI_ISL_3902695 | 2021-09-02      |
| hCoV-19/Japan/PG-92212/2021 | EPI_ISL_3902699 | 2021-09-02      |
| hCoV-19/Japan/PG-92213/2021 | EPI_ISL_3902702 | 2021-09-02      |
| hCoV-19/Japan/PG-92214/2021 | EPI_ISL_3902705 | 2021-09-02      |
| hCoV-19/Japan/PG-92215/2021 | EPI_ISL_3902709 | 2021-09-02      |
| hCoV-19/Japan/PG-92216/2021 | EPI_ISL_3902712 | 2021-09-02      |
| hCoV-19/Japan/PG-92217/2021 | EPI_ISL_3902715 | 2021-09-02      |
| hCoV-19/Japan/PG-92218/2021 | EPI_ISL_3902718 | 2021-09-02      |
| hCoV-19/Japan/PG-92219/2021 | EPI_ISL_3902722 | 2021-09-02      |
| hCoV-19/Japan/PG-92220/2021 | EPI_ISL_3902725 | 2021-09-02      |
| hCoV-19/Japan/PG-92221/2021 | EPI_ISL_3902728 | 2021-09-02      |
| hCoV-19/Japan/PG-92222/2021 | EPI_ISL_3902731 | 2021-09-02      |
| hCoV-19/Japan/PG-92223/2021 | EPI_ISL_3902733 | 2021-09-02      |
| hCoV-19/Japan/PG-92224/2021 | EPI_ISL_3902734 | 2021-09-02      |
| hCoV-19/Japan/PG-92225/2021 | EPI_ISL_3902735 | 2021-09-02      |
| hCoV-19/Japan/PG-92226/2021 | EPI_ISL_3902736 | 2021-09-02      |
| hCoV-19/Japan/PG-92227/2021 | EPI_ISL_3902737 | 2021-09-02      |
| hCoV-19/Japan/PG-92228/2021 | EPI_ISL_3902738 | 2021-09-02      |
| hCoV-19/Japan/PG-92229/2021 | EPI_ISL_3902739 | 2021-09-02      |
| hCoV-19/Japan/PG-92230/2021 | EPI_ISL_3902740 | 2021-09-02      |
| hCoV-19/Japan/PG-92231/2021 | EPI_ISL_3902741 | 2021-09-02      |
| hCoV-19/Japan/PG-92232/2021 | EPI_ISL_3902742 | 2021-09-02      |
| hCoV-19/Japan/PG-92233/2021 | EPI_ISL_3902743 | 2021-09-02      |
| hCoV-19/Japan/PG-92234/2021 | EPI_ISL_3902744 | 2021-09-02      |
| hCoV-19/Japan/PG-92235/2021 | EPI_ISL_3902745 | 2021-09-02      |
| hCoV-19/Japan/PG-92236/2021 | EPI_ISL_3902746 | 2021-09-02      |
| hCoV-19/Japan/PG-92237/2021 | EPI_ISL_3902747 | 2021-09-02      |
| hCoV-19/Japan/PG-92238/2021 | EPI_ISL_3902748 | 2021-09-02      |
| hCoV-19/Japan/PG-92239/2021 | EPI_ISL_3902749 | 2021-09-02      |
| hCoV-19/Japan/PG-92240/2021 | EPI_ISL_3902750 | 2021-09-02      |
| hCoV-19/Japan/PG-92241/2021 | EPI_ISL_3902751 | 2021-09-02      |
| hCoV-19/Japan/PG-92242/2021 | EPI_ISL_3902752 | 2021-09-02      |
| hCoV-19/Japan/PG-92243/2021 | EPI_ISL_3902753 | 2021-09-02      |
| hCoV-19/Japan/PG-92244/2021 | EPI_ISL_3902754 | 2021-09-02      |
| hCoV-19/Japan/PG-92245/2021 | EPI_ISL_3902755 | 2021-09-02      |
| hCoV-19/Japan/PG-92246/2021 | EPI_ISL_3902756 | 2021-09-02      |
| hCoV-19/Japan/PG-92247/2021 | EPI_ISL_3902757 | 2021-09-02      |
| hCoV-19/Japan/PG-92248/2021 | EPI_ISL_3902758 | 2021-09-02      |
| hCoV-19/Japan/PG-92249/2021 | EPI_ISL_3902759 | 2021-09-02      |
| hCoV-19/Japan/PG-92250/2021 | EPI_ISL_3902760 | 2021-09-02      |
| hCoV-19/Japan/PG-92251/2021 | EPI_ISL_3902761 | 2021-09-02      |
| hCoV-19/Japan/PG-92252/2021 | EPI_ISL_3902762 | 2021-09-02      |

| virus_name                  | epiID           | submission_date |
|-----------------------------|-----------------|-----------------|
| hCoV-19/Japan/PG-92253/2021 | EPI_ISL_3902763 | 2021-09-02      |
| hCoV-19/Japan/PG-92254/2021 | EPI_ISL_3902764 | 2021-09-02      |
| hCoV-19/Japan/PG-92255/2021 | EPI_ISL_3902765 | 2021-09-02      |
| hCoV-19/Japan/PG-92256/2021 | EPI_ISL_3902766 | 2021-09-02      |
| hCoV-19/Japan/PG-92257/2021 | EPI_ISL_3902767 | 2021-09-02      |
| hCoV-19/Japan/PG-92258/2021 | EPI_ISL_3902768 | 2021-09-02      |
| hCoV-19/Japan/PG-92259/2021 | EPI_ISL_3902769 | 2021-09-02      |
| hCoV-19/Japan/PG-92260/2021 | EPI_ISL_3902770 | 2021-09-02      |
| hCoV-19/Japan/PG-92261/2021 | EPI_ISL_3902771 | 2021-09-02      |
| hCoV-19/Japan/PG-92262/2021 | EPI_ISL_3902772 | 2021-09-02      |
| hCoV-19/Japan/PG-92263/2021 | EPI_ISL_3902773 | 2021-09-02      |
| hCoV-19/Japan/PG-92264/2021 | EPI_ISL_3902774 | 2021-09-02      |
| hCoV-19/Japan/PG-92265/2021 | EPI_ISL_3902775 | 2021-09-02      |
| hCoV-19/Japan/PG-92266/2021 | EPI_ISL_3902776 | 2021-09-02      |
| hCoV-19/Japan/PG-92267/2021 | EPI_ISL_3902777 | 2021-09-02      |
| hCoV-19/Japan/PG-92268/2021 | EPI_ISL_3902778 | 2021-09-02      |
| hCoV-19/Japan/PG-92269/2021 | EPI_ISL_3902779 | 2021-09-02      |
| hCoV-19/Japan/PG-92270/2021 | EPI_ISL_3902780 | 2021-09-02      |
| hCoV-19/Japan/PG-92271/2021 | EPI_ISL_3902781 | 2021-09-02      |
| hCoV-19/Japan/PG-92272/2021 | EPI_ISL_3902782 | 2021-09-02      |
| hCoV-19/Japan/PG-92273/2021 | EPI_ISL_3902783 | 2021-09-02      |
| hCoV-19/Japan/PG-92274/2021 | EPI_ISL_3902784 | 2021-09-02      |
| hCoV-19/Japan/PG-92275/2021 | EPI_ISL_3902785 | 2021-09-02      |
| hCoV-19/Japan/PG-92276/2021 | EPI_ISL_3902786 | 2021-09-02      |
| hCoV-19/Japan/PG-92277/2021 | EPI_ISL_3902787 | 2021-09-02      |
| hCoV-19/Japan/PG-92278/2021 | EPI_ISL_3902788 | 2021-09-02      |
| hCoV-19/Japan/PG-92279/2021 | EPI_ISL_3902789 | 2021-09-02      |
| hCoV-19/Japan/PG-92280/2021 | EPI_ISL_3902790 | 2021-09-02      |
| hCoV-19/Japan/PG-92281/2021 | EPI_ISL_3902791 | 2021-09-02      |
| hCoV-19/Japan/PG-92282/2021 | EPI_ISL_3902792 | 2021-09-02      |
| hCoV-19/Japan/PG-92283/2021 | EPI_ISL_3902793 | 2021-09-02      |
| hCoV-19/Japan/PG-92284/2021 | EPI_ISL_3902794 | 2021-09-02      |
| hCoV-19/Japan/PG-92285/2021 | EPI_ISL_3902795 | 2021-09-02      |
| hCoV-19/Japan/PG-92286/2021 | EPI_ISL_3902796 | 2021-09-02      |
| hCoV-19/Japan/PG-92287/2021 | EPI_ISL_3902797 | 2021-09-02      |
| hCoV-19/Japan/PG-92288/2021 | EPI_ISL_3902798 | 2021-09-02      |
| hCoV-19/Japan/PG-92289/2021 | EPI_ISL_3902799 | 2021-09-02      |
| hCoV-19/Japan/PG-92290/2021 | EPI_ISL_3902800 | 2021-09-02      |
| hCoV-19/Japan/PG-92291/2021 | EPI_ISL_3902801 | 2021-09-02      |
| hCoV-19/Japan/PG-92292/2021 | EPI_ISL_3902802 | 2021-09-02      |
| hCoV-19/Japan/PG-92293/2021 | EPI_ISL_3902803 | 2021-09-02      |
| hCoV-19/Japan/PG-92294/2021 | EPI_ISL_3902804 | 2021-09-02      |
| hCoV-19/Japan/PG-92295/2021 | EPI_ISL_3902805 | 2021-09-02      |
| hCoV-19/Japan/PG-92296/2021 | EPI_ISL_3902806 | 2021-09-02      |
| hCoV-19/Japan/PG-92297/2021 | EPI_ISL_3902807 | 2021-09-02      |
| hCoV-19/Japan/PG-92298/2021 | EPI_ISL_3902808 | 2021-09-02      |
| hCoV-19/Japan/PG-92299/2021 | EPI_ISL_3902809 | 2021-09-02      |
| hCoV-19/Japan/PG-92300/2021 | EPI_ISL_3902810 | 2021-09-02      |
| hCoV-19/Japan/PG-92301/2021 | EPI_ISL_3902811 | 2021-09-02      |
| hCoV-19/Japan/PG-92302/2021 | EPI_ISL_3902812 | 2021-09-02      |
| hCoV-19/Japan/PG-92303/2021 | EPI_ISL_3902813 | 2021-09-02      |
| hCoV-19/Japan/PG-92304/2021 | EPI_ISL_3902814 | 2021-09-02      |
| hCoV-19/Japan/PG-92305/2021 | EPI_ISL_3902815 | 2021-09-02      |
| hCoV-19/Japan/PG-92306/2021 | EPI_ISL_3904546 | 2021-09-02      |

| virus_name                  | epiID           | submission_date |
|-----------------------------|-----------------|-----------------|
| hCoV-19/Japan/PG-92307/2021 | EPI_ISL_3902817 | 2021-09-02      |
| hCoV-19/Japan/PG-92308/2021 | EPI_ISL_3902820 | 2021-09-02      |
| hCoV-19/Japan/PG-92309/2021 | EPI_ISL_3902823 | 2021-09-02      |
| hCoV-19/Japan/PG-92310/2021 | EPI_ISL_3902826 | 2021-09-02      |
| hCoV-19/Japan/PG-92311/2021 | EPI_ISL_3902830 | 2021-09-02      |
| hCoV-19/Japan/PG-92312/2021 | EPI_ISL_3902833 | 2021-09-02      |
| hCoV-19/Japan/PG-92313/2021 | EPI_ISL_3902836 | 2021-09-02      |
| hCoV-19/Japan/PG-92314/2021 | EPI_ISL_3902840 | 2021-09-02      |
| hCoV-19/Japan/PG-92315/2021 | EPI_ISL_3902843 | 2021-09-02      |
| hCoV-19/Japan/PG-92316/2021 | EPI_ISL_3902847 | 2021-09-02      |
| hCoV-19/Japan/PG-92317/2021 | EPI_ISL_3902850 | 2021-09-02      |
| hCoV-19/Japan/PG-92318/2021 | EPI_ISL_3902853 | 2021-09-02      |
| hCoV-19/Japan/PG-92319/2021 | EPI_ISL_3902856 | 2021-09-02      |
| hCoV-19/Japan/PG-92320/2021 | EPI_ISL_3902859 | 2021-09-02      |
| hCoV-19/Japan/PG-92321/2021 | EPI_ISL_3902863 | 2021-09-02      |
| hCoV-19/Japan/PG-92322/2021 | EPI_ISL_3902866 | 2021-09-02      |
| hCoV-19/Japan/PG-92323/2021 | EPI_ISL_3902869 | 2021-09-02      |
| hCoV-19/Japan/PG-92324/2021 | EPI_ISL_3902872 | 2021-09-02      |
| hCoV-19/Japan/PG-92325/2021 | EPI_ISL_3902874 | 2021-09-02      |
| hCoV-19/Japan/PG-92326/2021 | EPI_ISL_3902877 | 2021-09-02      |
| hCoV-19/Japan/PG-92327/2021 | EPI_ISL_3902881 | 2021-09-02      |
| hCoV-19/Japan/PG-92328/2021 | EPI_ISL_3902884 | 2021-09-02      |
| hCoV-19/Japan/PG-92329/2021 | EPI_ISL_3902887 | 2021-09-02      |
| hCoV-19/Japan/PG-92330/2021 | EPI_ISL_3904547 | 2021-09-02      |
| hCoV-19/Japan/PG-92331/2021 | EPI_ISL_3902893 | 2021-09-02      |
| hCoV-19/Japan/PG-92332/2021 | EPI_ISL_3902896 | 2021-09-02      |
| hCoV-19/Japan/PG-92333/2021 | EPI_ISL_3902900 | 2021-09-02      |
| hCoV-19/Japan/PG-92334/2021 | EPI_ISL_3902903 | 2021-09-02      |
| hCoV-19/Japan/PG-92335/2021 | EPI_ISL_3902907 | 2021-09-02      |
| hCoV-19/Japan/PG-92336/2021 | EPI_ISL_3902910 | 2021-09-02      |
| hCoV-19/Japan/PG-92337/2021 | EPI_ISL_3902913 | 2021-09-02      |
| hCoV-19/Japan/PG-92338/2021 | EPI_ISL_3902916 | 2021-09-02      |
| hCoV-19/Japan/PG-92339/2021 | EPI_ISL_3902920 | 2021-09-02      |
| hCoV-19/Japan/PG-92340/2021 | EPI_ISL_3902922 | 2021-09-02      |
| hCoV-19/Japan/PG-92341/2021 | EPI_ISL_3902926 | 2021-09-02      |
| hCoV-19/Japan/PG-92342/2021 | EPI_ISL_3902929 | 2021-09-02      |
| hCoV-19/Japan/PG-92343/2021 | EPI_ISL_3902931 | 2021-09-02      |
| hCoV-19/Japan/PG-92344/2021 | EPI_ISL_3902935 | 2021-09-02      |
| hCoV-19/Japan/PG-92345/2021 | EPI_ISL_3904548 | 2021-09-02      |
| hCoV-19/Japan/PG-92346/2021 | EPI_ISL_3902940 | 2021-09-02      |
| hCoV-19/Japan/PG-92347/2021 | EPI_ISL_3902944 | 2021-09-02      |
| hCoV-19/Japan/PG-92348/2021 | EPI_ISL_3902947 | 2021-09-02      |
| hCoV-19/Japan/PG-92349/2021 | EPI_ISL_3902951 | 2021-09-02      |
| hCoV-19/Japan/PG-92350/2021 | EPI_ISL_3902954 | 2021-09-02      |
| hCoV-19/Japan/PG-92351/2021 | EPI_ISL_3902958 | 2021-09-02      |
| hCoV-19/Japan/PG-92352/2021 | EPI_ISL_3902961 | 2021-09-02      |
| hCoV-19/Japan/PG-92353/2021 | EPI_ISL_3902965 | 2021-09-02      |
| hCoV-19/Japan/PG-92354/2021 | EPI_ISL_3902968 | 2021-09-02      |
| hCoV-19/Japan/PG-92355/2021 | EPI_ISL_3902971 | 2021-09-02      |
| hCoV-19/Japan/PG-92356/2021 | EPI_ISL_3902974 | 2021-09-02      |
| hCoV-19/Japan/PG-92357/2021 | EPI_ISL_3902978 | 2021-09-02      |
| hCoV-19/Japan/PG-92358/2021 | EPI_ISL_3902981 | 2021-09-02      |
| hCoV-19/Japan/PG-92359/2021 | EPI_ISL_3902984 | 2021-09-02      |
| hCoV-19/Japan/PG-92360/2021 | EPI_ISL_3902988 | 2021-09-02      |

| virus_name                  | epiID           | submission_date |
|-----------------------------|-----------------|-----------------|
| hCoV-19/Japan/PG-92361/2021 | EPI_ISL_3902991 | 2021-09-02      |
| hCoV-19/Japan/PG-92362/2021 | EPI_ISL_3902994 | 2021-09-02      |
| hCoV-19/Japan/PG-92363/2021 | EPI_ISL_3902997 | 2021-09-02      |
| hCoV-19/Japan/PG-92364/2021 | EPI_ISL_3903000 | 2021-09-02      |
| hCoV-19/Japan/PG-92365/2021 | EPI_ISL_3903004 | 2021-09-02      |
| hCoV-19/Japan/PG-92366/2021 | EPI_ISL_3903007 | 2021-09-02      |
| hCoV-19/Japan/PG-92367/2021 | EPI_ISL_3903010 | 2021-09-02      |
| hCoV-19/Japan/PG-92368/2021 | EPI_ISL_3903013 | 2021-09-02      |
| hCoV-19/Japan/PG-92369/2021 | EPI_ISL_3903016 | 2021-09-02      |
| hCoV-19/Japan/PG-92370/2021 | EPI_ISL_3903019 | 2021-09-02      |
| hCoV-19/Japan/PG-92371/2021 | EPI_ISL_3903022 | 2021-09-02      |
| hCoV-19/Japan/PG-92372/2021 | EPI_ISL_3903025 | 2021-09-02      |
| hCoV-19/Japan/PG-92373/2021 | EPI_ISL_3903028 | 2021-09-02      |
| hCoV-19/Japan/PG-92374/2021 | EPI_ISL_3903032 | 2021-09-02      |
| hCoV-19/Japan/PG-92375/2021 | EPI_ISL_3903035 | 2021-09-02      |
| hCoV-19/Japan/PG-92376/2021 | EPI_ISL_3903039 | 2021-09-02      |
| hCoV-19/Japan/PG-92377/2021 | EPI_ISL_3903042 | 2021-09-02      |
| hCoV-19/Japan/PG-92378/2021 | EPI_ISL_3903046 | 2021-09-02      |
| hCoV-19/Japan/PG-92379/2021 | EPI_ISL_3903049 | 2021-09-02      |
| hCoV-19/Japan/PG-92380/2021 | EPI_ISL_3903053 | 2021-09-02      |
| hCoV-19/Japan/PG-92381/2021 | EPI_ISL_3903056 | 2021-09-02      |
| hCoV-19/Japan/PG-92382/2021 | EPI_ISL_3903060 | 2021-09-02      |
| hCoV-19/Japan/PG-92383/2021 | EPI_ISL_3903063 | 2021-09-02      |
| hCoV-19/Japan/PG-92384/2021 | EPI_ISL_3903066 | 2021-09-02      |
| hCoV-19/Japan/PG-92385/2021 | EPI_ISL_3903069 | 2021-09-02      |
| hCoV-19/Japan/PG-92386/2021 | EPI_ISL_3903073 | 2021-09-02      |
| hCoV-19/Japan/PG-92387/2021 | EPI_ISL_3903076 | 2021-09-02      |
| hCoV-19/Japan/PG-92388/2021 | EPI_ISL_3903079 | 2021-09-02      |
| hCoV-19/Japan/PG-92389/2021 | EPI_ISL_3903082 | 2021-09-02      |
| hCoV-19/Japan/PG-92390/2021 | EPI_ISL_3903085 | 2021-09-02      |
| hCoV-19/Japan/PG-92391/2021 | EPI_ISL_3903088 | 2021-09-02      |
| hCoV-19/Japan/PG-92392/2021 | EPI_ISL_3903092 | 2021-09-02      |
| hCoV-19/Japan/PG-92393/2021 | EPI_ISL_3903094 | 2021-09-02      |
| hCoV-19/Japan/PG-92394/2021 | EPI_ISL_3903098 | 2021-09-02      |
| hCoV-19/Japan/PG-92395/2021 | EPI_ISL_3903101 | 2021-09-02      |
| hCoV-19/Japan/PG-92396/2021 | EPI_ISL_3903104 | 2021-09-02      |
| hCoV-19/Japan/PG-92397/2021 | EPI_ISL_3903108 | 2021-09-02      |
| hCoV-19/Japan/PG-92398/2021 | EPI_ISL_3903111 | 2021-09-02      |
| hCoV-19/Japan/PG-92399/2021 | EPI_ISL_3903114 | 2021-09-02      |
| hCoV-19/Japan/PG-92400/2021 | EPI_ISL_3903118 | 2021-09-02      |
| hCoV-19/Japan/PG-92401/2021 | EPI_ISL_3903121 | 2021-09-02      |
| hCoV-19/Japan/PG-92402/2021 | EPI_ISL_3903125 | 2021-09-02      |
| hCoV-19/Japan/PG-92403/2021 | EPI_ISL_3903128 | 2021-09-02      |
| hCoV-19/Japan/PG-92404/2021 | EPI_ISL_3903131 | 2021-09-02      |
| hCoV-19/Japan/PG-92405/2021 | EPI_ISL_3903133 | 2021-09-02      |
| hCoV-19/Japan/PG-92406/2021 | EPI_ISL_3904549 | 2021-09-02      |
| hCoV-19/Japan/PG-92407/2021 | EPI_ISL_3903139 | 2021-09-02      |
| hCoV-19/Japan/PG-92408/2021 | EPI_ISL_3903142 | 2021-09-02      |
| hCoV-19/Japan/PG-92409/2021 | EPI_ISL_3903144 | 2021-09-02      |
| hCoV-19/Japan/PG-92410/2021 | EPI_ISL_3903147 | 2021-09-02      |
| hCoV-19/Japan/PG-92411/2021 | EPI_ISL_3903151 | 2021-09-02      |
| hCoV-19/Japan/PG-92412/2021 | EPI_ISL_3903154 | 2021-09-02      |
| hCoV-19/Japan/PG-92413/2021 | EPI_ISL_3903157 | 2021-09-02      |
| hCoV-19/Japan/PG-92414/2021 | EPI_ISL_3903161 | 2021-09-02      |

| virus_name                  | epiID           | submission_date |
|-----------------------------|-----------------|-----------------|
| hCoV-19/Japan/PG-92415/2021 | EPI_ISL_3903164 | 2021-09-02      |
| hCoV-19/Japan/PG-92416/2021 | EPI_ISL_3903168 | 2021-09-02      |
| hCoV-19/Japan/PG-92417/2021 | EPI_ISL_3903171 | 2021-09-02      |
| hCoV-19/Japan/PG-92418/2021 | EPI_ISL_3903174 | 2021-09-02      |
| hCoV-19/Japan/PG-92419/2021 | EPI_ISL_3903178 | 2021-09-02      |
| hCoV-19/Japan/PG-92420/2021 | EPI_ISL_3903180 | 2021-09-02      |
| hCoV-19/Japan/PG-92421/2021 | EPI_ISL_3903184 | 2021-09-02      |
| hCoV-19/Japan/PG-92422/2021 | EPI_ISL_3903187 | 2021-09-02      |
| hCoV-19/Japan/PG-92425/2021 | EPI_ISL_3903189 | 2021-09-02      |
| hCoV-19/Japan/PG-92426/2021 | EPI_ISL_3903193 | 2021-09-02      |
| hCoV-19/Japan/PG-92427/2021 | EPI_ISL_3903195 | 2021-09-02      |
| hCoV-19/Japan/PG-92428/2021 | EPI_ISL_3903198 | 2021-09-02      |
| hCoV-19/Japan/PG-92429/2021 | EPI_ISL_3903201 | 2021-09-02      |
| hCoV-19/Japan/PG-92430/2021 | EPI_ISL_3903205 | 2021-09-02      |
| hCoV-19/Japan/PG-92431/2021 | EPI_ISL_3903208 | 2021-09-02      |
| hCoV-19/Japan/PG-92432/2021 | EPI_ISL_3903211 | 2021-09-02      |
| hCoV-19/Japan/PG-92433/2021 | EPI_ISL_3903215 | 2021-09-02      |
| hCoV-19/Japan/PG-92434/2021 | EPI_ISL_3903218 | 2021-09-02      |
| hCoV-19/Japan/PG-92435/2021 | EPI_ISL_3903222 | 2021-09-02      |
| hCoV-19/Japan/PG-92436/2021 | EPI_ISL_3903225 | 2021-09-02      |
| hCoV-19/Japan/PG-92437/2021 | EPI_ISL_3903228 | 2021-09-02      |
| hCoV-19/Japan/PG-92438/2021 | EPI_ISL_3903232 | 2021-09-02      |
| hCoV-19/Japan/PG-92439/2021 | EPI_ISL_3903241 | 2021-09-02      |
| hCoV-19/Japan/PG-92440/2021 | EPI_ISL_3903244 | 2021-09-02      |
| hCoV-19/Japan/PG-92441/2021 | EPI_ISL_3903248 | 2021-09-02      |
| hCoV-19/Japan/PG-92442/2021 | EPI_ISL_3903251 | 2021-09-02      |
| hCoV-19/Japan/PG-92443/2021 | EPI_ISL_3903255 | 2021-09-02      |
| hCoV-19/Japan/PG-92444/2021 | EPI_ISL_3903259 | 2021-09-02      |
| hCoV-19/Japan/PG-92445/2021 | EPI_ISL_3903262 | 2021-09-02      |
| hCoV-19/Japan/PG-92446/2021 | EPI_ISL_3903265 | 2021-09-02      |
| hCoV-19/Japan/PG-92447/2021 | EPI_ISL_3903268 | 2021-09-02      |
| hCoV-19/Japan/PG-92448/2021 | EPI_ISL_3903272 | 2021-09-02      |
| hCoV-19/Japan/PG-92449/2021 | EPI_ISL_3903275 | 2021-09-02      |
| hCoV-19/Japan/PG-92450/2021 | EPI_ISL_3903278 | 2021-09-02      |
| hCoV-19/Japan/PG-92451/2021 | EPI_ISL_3903281 | 2021-09-02      |
| hCoV-19/Japan/PG-92452/2021 | EPI_ISL_3903284 | 2021-09-02      |
| hCoV-19/Japan/PG-92453/2021 | EPI_ISL_3903288 | 2021-09-02      |
| hCoV-19/Japan/PG-92454/2021 | EPI_ISL_3903291 | 2021-09-02      |
| hCoV-19/Japan/PG-92455/2021 | EPI_ISL_3903294 | 2021-09-02      |
| hCoV-19/Japan/PG-92456/2021 | EPI_ISL_3903297 | 2021-09-02      |
| hCoV-19/Japan/PG-92457/2021 | EPI_ISL_3903301 | 2021-09-02      |
| hCoV-19/Japan/PG-92458/2021 | EPI_ISL_3903304 | 2021-09-02      |
| hCoV-19/Japan/PG-92459/2021 | EPI_ISL_3903308 | 2021-09-02      |
| hCoV-19/Japan/PG-92460/2021 | EPI_ISL_3903311 | 2021-09-02      |
| hCoV-19/Japan/PG-92461/2021 | EPI_ISL_3903314 | 2021-09-02      |
| hCoV-19/Japan/PG-92462/2021 | EPI_ISL_3903318 | 2021-09-02      |
| hCoV-19/Japan/PG-92463/2021 | EPI_ISL_3903321 | 2021-09-02      |
| hCoV-19/Japan/PG-92464/2021 | EPI_ISL_3903324 | 2021-09-02      |
| hCoV-19/Japan/PG-92465/2021 | EPI_ISL_3903327 | 2021-09-02      |
| hCoV-19/Japan/PG-92466/2021 | EPI_ISL_3903330 | 2021-09-02      |
| hCoV-19/Japan/PG-92467/2021 | EPI_ISL_3903334 | 2021-09-02      |
| hCoV-19/Japan/PG-92468/2021 | EPI_ISL_3903337 | 2021-09-02      |
| hCoV-19/Japan/PG-92469/2021 | EPI_ISL_3903338 | 2021-09-02      |
| hCoV-19/Japan/PG-92470/2021 | EPI_ISL_3903339 | 2021-09-02      |

| virus_name                  | epiID           | submission_date |
|-----------------------------|-----------------|-----------------|
| hCoV-19/Japan/PG-92471/2021 | EPI_ISL_3903341 | 2021-09-02      |
| hCoV-19/Japan/PG-92472/2021 | EPI_ISL_3903342 | 2021-09-02      |
| hCoV-19/Japan/PG-92473/2021 | EPI_ISL_3903343 | 2021-09-02      |
| hCoV-19/Japan/PG-92474/2021 | EPI_ISL_3903345 | 2021-09-02      |
| hCoV-19/Japan/PG-92475/2021 | EPI_ISL_3903346 | 2021-09-02      |
| hCoV-19/Japan/PG-92476/2021 | EPI_ISL_3903347 | 2021-09-02      |
| hCoV-19/Japan/PG-92477/2021 | EPI_ISL_3903349 | 2021-09-02      |
| hCoV-19/Japan/PG-92478/2021 | EPI_ISL_3903350 | 2021-09-02      |
| hCoV-19/Japan/PG-92479/2021 | EPI_ISL_3903351 | 2021-09-02      |
| hCoV-19/Japan/PG-92480/2021 | EPI_ISL_3903352 | 2021-09-02      |
| hCoV-19/Japan/PG-92481/2021 | EPI_ISL_3903354 | 2021-09-02      |
| hCoV-19/Japan/PG-92482/2021 | EPI_ISL_3903355 | 2021-09-02      |
| hCoV-19/Japan/PG-92483/2021 | EPI_ISL_3903356 | 2021-09-02      |
| hCoV-19/Japan/PG-92484/2021 | EPI_ISL_3903358 | 2021-09-02      |
| hCoV-19/Japan/PG-92485/2021 | EPI_ISL_3903359 | 2021-09-02      |
| hCoV-19/Japan/PG-92486/2021 | EPI_ISL_3903360 | 2021-09-02      |
| hCoV-19/Japan/PG-92487/2021 | EPI_ISL_3903362 | 2021-09-02      |
| hCoV-19/Japan/PG-92488/2021 | EPI_ISL_3903363 | 2021-09-02      |
| hCoV-19/Japan/PG-92489/2021 | EPI_ISL_3903364 | 2021-09-02      |
| hCoV-19/Japan/PG-92490/2021 | EPI_ISL_3903366 | 2021-09-02      |
| hCoV-19/Japan/PG-92491/2021 | EPI_ISL_3903367 | 2021-09-02      |
| hCoV-19/Japan/PG-92492/2021 | EPI_ISL_3903368 | 2021-09-02      |
| hCoV-19/Japan/PG-92493/2021 | EPI_ISL_3903369 | 2021-09-02      |
| hCoV-19/Japan/PG-92494/2021 | EPI_ISL_3903371 | 2021-09-02      |
| hCoV-19/Japan/PG-92495/2021 | EPI_ISL_3903372 | 2021-09-02      |
| hCoV-19/Japan/PG-92496/2021 | EPI_ISL_3903373 | 2021-09-02      |
| hCoV-19/Japan/PG-92505/2021 | EPI_ISL_3870860 | 2021-09-02      |
| hCoV-19/Japan/PG-92506/2021 | EPI_ISL_3870861 | 2021-09-02      |
| hCoV-19/Japan/PG-92507/2021 | EPI_ISL_3870862 | 2021-09-02      |
| hCoV-19/Japan/PG-92508/2021 | EPI_ISL_3870863 | 2021-09-02      |
| hCoV-19/Japan/PG-92509/2021 | EPI_ISL_3870864 | 2021-09-02      |
| hCoV-19/Japan/PG-92510/2021 | EPI_ISL_3870865 | 2021-09-02      |
| hCoV-19/Japan/PG-92511/2021 | EPI_ISL_3870866 | 2021-09-02      |
| hCoV-19/Japan/PG-92512/2021 | EPI_ISL_3870867 | 2021-09-02      |
| hCoV-19/Japan/PG-92513/2021 | EPI_ISL_3870868 | 2021-09-02      |
| hCoV-19/Japan/PG-92514/2021 | EPI_ISL_3870869 | 2021-09-02      |
| hCoV-19/Japan/PG-92515/2021 | EPI_ISL_3870870 | 2021-09-02      |
| hCoV-19/Japan/PG-92516/2021 | EPI_ISL_3870871 | 2021-09-02      |
| hCoV-19/Japan/PG-92517/2021 | EPI_ISL_3870872 | 2021-09-02      |
| hCoV-19/Japan/PG-92518/2021 | EPI_ISL_3870873 | 2021-09-02      |
| hCoV-19/Japan/PG-92519/2021 | EPI_ISL_3870874 | 2021-09-02      |
| hCoV-19/Japan/PG-92520/2021 | EPI_ISL_3870875 | 2021-09-02      |
| hCoV-19/Japan/PG-92521/2021 | EPI_ISL_3870876 | 2021-09-02      |
| hCoV-19/Japan/PG-92522/2021 | EPI_ISL_3870877 | 2021-09-02      |
| hCoV-19/Japan/PG-92523/2021 | EPI_ISL_3870878 | 2021-09-02      |
| hCoV-19/Japan/PG-92524/2021 | EPI_ISL_3870879 | 2021-09-02      |
| hCoV-19/Japan/PG-92525/2021 | EPI_ISL_3870880 | 2021-09-02      |
| hCoV-19/Japan/PG-92526/2021 | EPI_ISL_3870881 | 2021-09-02      |
| hCoV-19/Japan/PG-92527/2021 | EPI_ISL_3870882 | 2021-09-02      |
| hCoV-19/Japan/PG-92528/2021 | EPI_ISL_3870883 | 2021-09-02      |
| hCoV-19/Japan/PG-92529/2021 | EPI_ISL_3870884 | 2021-09-02      |
| hCoV-19/Japan/PG-92530/2021 | EPI_ISL_3870885 | 2021-09-02      |
| hCoV-19/Japan/PG-92531/2021 | EPI_ISL_3870886 | 2021-09-02      |
| hCoV-19/Japan/PG-92532/2021 | EPI_ISL_3870887 | 2021-09-02      |



| virus_name                  | epiID           | submission_date |
|-----------------------------|-----------------|-----------------|
| hCoV-19/Japan/PG-92533/2021 | EPI_ISL_3870888 | 2021-09-02      |
| hCoV-19/Japan/PG-92534/2021 | EPI_ISL_3870889 | 2021-09-02      |
| hCoV-19/Japan/PG-92535/2021 | EPI_ISL_3870890 | 2021-09-02      |
| hCoV-19/Japan/PG-92536/2021 | EPI_ISL_3870891 | 2021-09-02      |
| hCoV-19/Japan/PG-92537/2021 | EPI_ISL_3870892 | 2021-09-02      |
| hCoV-19/Japan/PG-92538/2021 | EPI_ISL_3870893 | 2021-09-02      |
| hCoV-19/Japan/PG-92539/2021 | EPI_ISL_3870894 | 2021-09-02      |
| hCoV-19/Japan/PG-92540/2021 | EPI_ISL_3870895 | 2021-09-02      |
| hCoV-19/Japan/PG-92541/2021 | EPI_ISL_3870896 | 2021-09-02      |
| hCoV-19/Japan/PG-92542/2021 | EPI_ISL_3870897 | 2021-09-02      |
| hCoV-19/Japan/PG-92543/2021 | EPI_ISL_3870898 | 2021-09-02      |
| hCoV-19/Japan/PG-92544/2021 | EPI_ISL_3870899 | 2021-09-02      |
| hCoV-19/Japan/PG-92545/2021 | EPI_ISL_3870900 | 2021-09-02      |
| hCoV-19/Japan/PG-92546/2021 | EPI_ISL_3870901 | 2021-09-02      |
| hCoV-19/Japan/PG-92547/2021 | EPI_ISL_3870902 | 2021-09-02      |
| hCoV-19/Japan/PG-92548/2021 | EPI_ISL_3870903 | 2021-09-02      |
| hCoV-19/Japan/PG-92549/2021 | EPI_ISL_3870904 | 2021-09-02      |
| hCoV-19/Japan/PG-92550/2021 | EPI_ISL_3870905 | 2021-09-02      |
| hCoV-19/Japan/PG-92551/2021 | EPI_ISL_3870906 | 2021-09-02      |
| hCoV-19/Japan/PG-92552/2021 | EPI_ISL_3870907 | 2021-09-02      |
| hCoV-19/Japan/PG-92553/2021 | EPI_ISL_3870908 | 2021-09-02      |
| hCoV-19/Japan/PG-92554/2021 | EPI_ISL_3870909 | 2021-09-02      |
| hCoV-19/Japan/PG-92555/2021 | EPI_ISL_3870910 | 2021-09-02      |
| hCoV-19/Japan/PG-92556/2021 | EPI_ISL_3870911 | 2021-09-02      |
| hCoV-19/Japan/PG-92557/2021 | EPI_ISL_3870912 | 2021-09-02      |
| hCoV-19/Japan/PG-92558/2021 | EPI_ISL_3870913 | 2021-09-02      |
| hCoV-19/Japan/PG-92559/2021 | EPI_ISL_3870914 | 2021-09-02      |
| hCoV-19/Japan/PG-92560/2021 | EPI_ISL_3870915 | 2021-09-02      |
| hCoV-19/Japan/PG-92561/2021 | EPI_ISL_3870916 | 2021-09-02      |
| hCoV-19/Japan/PG-92562/2021 | EPI_ISL_3870917 | 2021-09-02      |
| hCoV-19/Japan/PG-92563/2021 | EPI_ISL_3870918 | 2021-09-02      |
| hCoV-19/Japan/PG-92564/2021 | EPI_ISL_3870919 | 2021-09-02      |
| hCoV-19/Japan/PG-92565/2021 | EPI_ISL_3870920 | 2021-09-02      |
| hCoV-19/Japan/PG-92566/2021 | EPI_ISL_3870921 | 2021-09-02      |
| hCoV-19/Japan/PG-92567/2021 | EPI_ISL_3870922 | 2021-09-02      |
| hCoV-19/Japan/PG-92568/2021 | EPI_ISL_3870923 | 2021-09-02      |
| hCoV-19/Japan/PG-92569/2021 | EPI_ISL_3870924 | 2021-09-02      |
| hCoV-19/Japan/PG-92570/2021 | EPI_ISL_3870925 | 2021-09-02      |
| hCoV-19/Japan/PG-92571/2021 | EPI_ISL_3870926 | 2021-09-02      |
| hCoV-19/Japan/PG-92572/2021 | EPI_ISL_3870927 | 2021-09-02      |
| hCoV-19/Japan/PG-92573/2021 | EPI_ISL_3870928 | 2021-09-02      |
| hCoV-19/Japan/PG-92574/2021 | EPI_ISL_3870929 | 2021-09-02      |
| hCoV-19/Japan/PG-92575/2021 | EPI_ISL_3870930 | 2021-09-02      |
| hCoV-19/Japan/PG-92576/2021 | EPI_ISL_3870931 | 2021-09-02      |
| hCoV-19/Japan/PG-92577/2021 | EPI_ISL_3870932 | 2021-09-02      |
| hCoV-19/Japan/PG-92578/2021 | EPI_ISL_3870933 | 2021-09-02      |
| hCoV-19/Japan/PG-92579/2021 | EPI_ISL_3870934 | 2021-09-02      |
| hCoV-19/Japan/PG-92580/2021 | EPI_ISL_3870935 | 2021-09-02      |
| hCoV-19/Japan/PG-92581/2021 | EPI_ISL_3870936 | 2021-09-02      |
| hCoV-19/Japan/PG-92582/2021 | EPI_ISL_3870937 | 2021-09-02      |
| hCoV-19/Japan/PG-92583/2021 | EPI_ISL_3870938 | 2021-09-02      |
| hCoV-19/Japan/PG-92584/2021 | EPI_ISL_3870939 | 2021-09-02      |
| hCoV-19/Japan/PG-92585/2021 | EPI_ISL_3870940 | 2021-09-02      |
| hCoV-19/Japan/PG-92586/2021 | EPI_ISL_3870941 | 2021-09-02      |

| virus_name                   | epiID           | submission_date |
|------------------------------|-----------------|-----------------|
| hCoV-19/Japan/PG-92587/2021  | EPI_ISL_3870942 | 2021-09-02      |
| hCoV-19/Japan/PG-92588/2021  | EPI_ISL_3870943 | 2021-09-02      |
| hCoV-19/Japan/PG-92589/2021  | EPI_ISL_3870944 | 2021-09-02      |
| hCoV-19/Japan/PG-92590/2021  | EPI_ISL_3870945 | 2021-09-02      |
| hCoV-19/Japan/PG-92591/2021  | EPI_ISL_3870946 | 2021-09-02      |
| hCoV-19/Japan/PG-92592/2021  | EPI_ISL_3870947 | 2021-09-02      |
| hCoV-19/Japan/PG-92593/2021  | EPI_ISL_3870948 | 2021-09-02      |
| hCoV-19/Japan/PG-92594/2021  | EPI_ISL_3870949 | 2021-09-02      |
| hCoV-19/Japan/PG-92595/2021  | EPI_ISL_3870950 | 2021-09-02      |
| hCoV-19/Japan/PG-92596/2021  | EPI_ISL_3870951 | 2021-09-02      |
| hCoV-19/Japan/PG-92597/2021  | EPI_ISL_3870952 | 2021-09-02      |
| hCoV-19/Japan/PG-92598/2021  | EPI_ISL_3870953 | 2021-09-02      |
| hCoV-19/Japan/PG-92706/2021  | EPI_ISL_3874462 | 2021-09-02      |
| hCoV-19/Japan/PG-92707/2021  | EPI_ISL_3874463 | 2021-09-02      |
| hCoV-19/Japan/PG-92708/2021  | EPI_ISL_3874464 | 2021-09-02      |
| hCoV-19/Japan/PG-92709/2021  | EPI_ISL_3874465 | 2021-09-02      |
| hCoV-19/Japan/PG-92710/2021  | EPI_ISL_3874466 | 2021-09-02      |
| hCoV-19/Japan/PG-92711/2021  | EPI_ISL_3874467 | 2021-09-02      |
| hCoV-19/Japan/PG-92712/2021  | EPI_ISL_3874468 | 2021-09-02      |
| hCoV-19/Japan/PG-92713/2021  | EPI_ISL_3874469 | 2021-09-02      |
| hCoV-19/Japan/PG-92714/2021  | EPI_ISL_3874470 | 2021-09-02      |
| hCoV-19/Japan/PG-92715/2021  | EPI_ISL_3870995 | 2021-09-02      |
| hCoV-19/Japan/PG-92716/2021  | EPI_ISL_3870996 | 2021-09-02      |
| hCoV-19/Japan/PG-92717/2021  | EPI_ISL_3870997 | 2021-09-02      |
| hCoV-19/Japan/PG-92718/2021  | EPI_ISL_3870998 | 2021-09-02      |
| hCoV-19/Japan/PG-92719/2021  | EPI_ISL_3870999 | 2021-09-02      |
| hCoV-19/Japan/PG-92720/2021  | EPI_ISL_3871000 | 2021-09-02      |
| hCoV-19/Japan/PG-92721/2021  | EPI_ISL_3871001 | 2021-09-02      |
| hCoV-19/Japan/PG-92722/2021  | EPI_ISL_3871002 | 2021-09-02      |
| hCoV-19/Japan/PG-92723/2021  | EPI_ISL_3871003 | 2021-09-02      |
| hCoV-19/Japan/PG-92724/2021  | EPI_ISL_3871004 | 2021-09-02      |
| hCoV-19/Japan/PG-92725/2021  | EPI_ISL_3871005 | 2021-09-02      |
| hCoV-19/Japan/TKYK26491/2021 | EPI_ISL_3907913 | 2021-09-02      |
| hCoV-19/Japan/TKYK26496/2021 | EPI_ISL_3907914 | 2021-09-02      |
| hCoV-19/Japan/TKYK26530/2021 | EPI_ISL_3907915 | 2021-09-02      |
| hCoV-19/Japan/TKYK26635/2021 | EPI_ISL_3907916 | 2021-09-02      |
| hCoV-19/Japan/TKYK26816/2021 | EPI_ISL_3907917 | 2021-09-02      |
| hCoV-19/Japan/TKYK26869/2021 | EPI_ISL_3907918 | 2021-09-02      |
| hCoV-19/Japan/TKYK26935/2021 | EPI_ISL_3907919 | 2021-09-02      |
| hCoV-19/Japan/TKYK27003/2021 | EPI_ISL_3907925 | 2021-09-02      |
| hCoV-19/Japan/TKYK27011/2021 | EPI_ISL_3907926 | 2021-09-02      |
| hCoV-19/Japan/TKYK27013/2021 | EPI_ISL_3907927 | 2021-09-02      |
| hCoV-19/Japan/TKYK27382/2021 | EPI_ISL_3907928 | 2021-09-02      |
| hCoV-19/Japan/TKYK27393/2021 | EPI_ISL_3907929 | 2021-09-02      |
| hCoV-19/Japan/TKYK27738/2021 | EPI_ISL_3907930 | 2021-09-02      |
| hCoV-19/Japan/TKYK27762/2021 | EPI_ISL_3907931 | 2021-09-02      |
| hCoV-19/Japan/TKYK28006/2021 | EPI_ISL_3907932 | 2021-09-02      |
| hCoV-19/Japan/TKYS00490/2021 | EPI_ISL_3907920 | 2021-09-02      |
| hCoV-19/Japan/TKYS00493/2021 | EPI_ISL_3907921 | 2021-09-02      |
| hCoV-19/Japan/TKYS00521/2021 | EPI_ISL_3907922 | 2021-09-02      |
| hCoV-19/Japan/TKYS00524/2021 | EPI_ISL_3907923 | 2021-09-02      |
| hCoV-19/Japan/TKYS00534/2021 | EPI_ISL_3907924 | 2021-09-02      |
| hCoV-19/Japan/YCH0639/2021   | EPI_ISL_3909431 | 2021-09-02      |
| hCoV-19/Japan/YCH0640/2021   | EPI_ISL_3909432 | 2021-09-02      |

| virus_name                 | epiID           | submission_date |
|----------------------------|-----------------|-----------------|
| hCoV-19/Japan/YCH0641/2021 | EPI_ISL_3909433 | 2021-09-02      |
| hCoV-19/Japan/YCH0642/2021 | EPI_ISL_3909434 | 2021-09-02      |
| hCoV-19/Japan/YCH0643/2021 | EPI_ISL_3909435 | 2021-09-02      |
| hCoV-19/Japan/YCH0644/2021 | EPI_ISL_3909436 | 2021-09-02      |
| hCoV-19/Japan/YCH0645/2021 | EPI_ISL_3909437 | 2021-09-02      |
| hCoV-19/Japan/YCH0646/2021 | EPI_ISL_3909438 | 2021-09-02      |
| hCoV-19/Japan/YCH0647/2021 | EPI_ISL_3909439 | 2021-09-02      |
| hCoV-19/Japan/YCH0648/2021 | EPI_ISL_3909440 | 2021-09-02      |
| hCoV-19/Japan/YCH0649/2021 | EPI_ISL_3909441 | 2021-09-02      |
| hCoV-19/Japan/YCH0650/2021 | EPI_ISL_3909442 | 2021-09-02      |
| hCoV-19/Japan/YCH0651/2021 | EPI_ISL_3909443 | 2021-09-02      |
| hCoV-19/Japan/YCH0652/2021 | EPI_ISL_3909444 | 2021-09-02      |
| hCoV-19/Japan/YCH0653/2021 | EPI_ISL_3909445 | 2021-09-02      |
| hCoV-19/Japan/YCH0654/2021 | EPI_ISL_3909446 | 2021-09-02      |
