# Supplementary material for: Genome Profiling of SARS-CoV-2 in Indonesia, ASEAN and the Neighbouring East Asian Countries: Features, Challenges and Achievements
Source: MDPI journal article supplement (doi:10.3390/v14040778), 2022-04-08
Supplement: s1 [file s1]

Authors are sorted alphabetically.

|                                                                                                                                                                                                                                                                                                                                                                                                                                                                                                                                                                                                                                                                                                                                                                                                                                                                                                                                                                                                                                                                                                                                                                                                                                                                                                                                                                                                                                                                                                                                                                                                                                                                                                                                                                                                                                                                                                                                                                                                                                                                                                                                                     |                                         |                                                                                  |                                                                                                                                                                                                                            |                                                                                                                                                                                                                                                                          |
|-----------------------------------------------------------------------------------------------------------------------------------------------------------------------------------------------------------------------------------------------------------------------------------------------------------------------------------------------------------------------------------------------------------------------------------------------------------------------------------------------------------------------------------------------------------------------------------------------------------------------------------------------------------------------------------------------------------------------------------------------------------------------------------------------------------------------------------------------------------------------------------------------------------------------------------------------------------------------------------------------------------------------------------------------------------------------------------------------------------------------------------------------------------------------------------------------------------------------------------------------------------------------------------------------------------------------------------------------------------------------------------------------------------------------------------------------------------------------------------------------------------------------------------------------------------------------------------------------------------------------------------------------------------------------------------------------------------------------------------------------------------------------------------------------------------------------------------------------------------------------------------------------------------------------------------------------------------------------------------------------------------------------------------------------------------------------------------------------------------------------------------------------------|-----------------------------------------|----------------------------------------------------------------------------------|----------------------------------------------------------------------------------------------------------------------------------------------------------------------------------------------------------------------------|--------------------------------------------------------------------------------------------------------------------------------------------------------------------------------------------------------------------------------------------------------------------------|
| EPI_ISL_1257857,<br>EPI_ISL_1257857,<br>EPI_ISL_1257858                                                                                                                                                                                                                                                                                                                                                                                                                                                                                                                                                                                                                                                                                                                                                                                                                                                                                                                                                                                                                                                                                                                                                                                                                                                                                                                                                                                                                                                                                                                                                                                                                                                                                                                                                                                                                                                                                                                                                                                                                                                                                             | BTKLPP Yogyakarta                       | National Institute of Health Research and Development                            | Arie Ardiansyah Nugraha; Hana Aparsi Pawestri; Hartanti Dian Ikwati; Havid Setyawan; Indaryati; Irene; Kartika Dewi Puspa; Krisna Pangesti; Nelly Puspandari; Subangkit; Vivi Setiawaty                                    |                                                                                                                                                                                                                                                                          |
| EPI_ISL_2617537,<br>EPI_ISL_2617538,<br>EPI_ISL_2617539,<br>EPI_ISL_2617540,<br>EPI_ISL_2617541,<br>EPI_ISL_2617542                                                                                                                                                                                                                                                                                                                                                                                                                                                                                                                                                                                                                                                                                                                                                                                                                                                                                                                                                                                                                                                                                                                                                                                                                                                                                                                                                                                                                                                                                                                                                                                                                                                                                                                                                                                                                                                                                                                                                                                                                                 | BLK Dan Pengujian Alkes Semarang Jateng | National Institute of Health Research and Development                            | Arie Ardiansyah Nugraha; Hana Aparsi Pawestri; Hartanti Dian Ikwati; Kartika Dewi Puspa; Krisna Pangesti; Nelly Puspandari; Subangkit; Triyani Soekarso; Vivi Setiawaty                                                    |                                                                                                                                                                                                                                                                          |
| EPI_ISL_4104499, EPI_ISL_4104500, EPI_ISL_4104501, EPI_ISL_4104502, EPI_ISL_4104503, EPI_ISL_4104504, EPI_ISL_4104505, EPI_ISL_4104506, EPI_ISL_4104507, EPI_ISL_4104508, EPI_ISL_4104509, EPI_ISL_4104510, EPI_ISL_4104511, EPI_ISL_4104512, EPI_ISL_5022948                                                                                                                                                                                                                                                                                                                                                                                                                                                                                                                                                                                                                                                                                                                                                                                                                                                                                                                                                                                                                                                                                                                                                                                                                                                                                                                                                                                                                                                                                                                                                                                                                                                                                                                                                                                                                                                                                       | see above                               | BLPKP Bangka Belitung (RSUD Depati Hamzah)                                       | National Institute of Health Research and Development                                                                                                                                                                      | Arie Ardiansyah Nugraha; Fajar Nur Sulistiyohadi; Hana Aparsi Pawestri; Hartanti Dian Ikwati; Kartika Dewi Puspa; Krisna Pangesti; Nelly Puspandari; Subangkit; Triyani Soekarso; Vivi Setiawaty                                                                         |
| EPI_ISL_2811837                                                                                                                                                                                                                                                                                                                                                                                                                                                                                                                                                                                                                                                                                                                                                                                                                                                                                                                                                                                                                                                                                                                                                                                                                                                                                                                                                                                                                                                                                                                                                                                                                                                                                                                                                                                                                                                                                                                                                                                                                                                                                                                                     | BMC Mayapada Hospital                   | Eijkman Institute for Molecular Biology, National Research and Innovation Agency | Amin Soebandrio; Edison Johar; Filasita A Yudhaputri; Hidayat Trimarsanto; Iskandar Adnan; Khin Saw Myint; Lidwina Priliani; Lydia V. Panggalo; Muhammad Rezki Rasyak; Safarina G Malik; Sukma Oktavianthi; Willy Agustine |                                                                                                                                                                                                                                                                          |
| EPI_ISL_1915579, EPI_ISL_2106975, EPI_ISL_5107784, EPI_ISL_5107785, EPI_ISL_5107786, EPI_ISL_5107787, EPI_ISL_5107788, EPI_ISL_5107789, EPI_ISL_5107790, EPI_ISL_5107791, EPI_ISL_5107792, EPI_ISL_5107793, EPI_ISL_5107794, EPI_ISL_5107795, EPI_ISL_5107796, EPI_ISL_5107797, EPI_ISL_5107799, EPI_ISL_5107800, EPI_ISL_5107801, EPI_ISL_5107802, EPI_ISL_5107803, EPI_ISL_5107804, EPI_ISL_5107805, EPI_ISL_5107806, EPI_ISL_5107807, EPI_ISL_5107808, EPI_ISL_5107809, EPI_ISL_5107810, EPI_ISL_5107811, EPI_ISL_5107812                                                                                                                                                                                                                                                                                                                                                                                                                                                                                                                                                                                                                                                                                                                                                                                                                                                                                                                                                                                                                                                                                                                                                                                                                                                                                                                                                                                                                                                                                                                                                                                                                        | see above                               | BPOM Gorontalo                                                                   | National Institute of Health Research and Development                                                                                                                                                                      | Arie Ardiansyah Nugraha; Fajar Nur Sulistiyohadi; Hana Aparsi Pawestri; Hartanti Dian Ikwati; Kartika Dewi Puspa; Krisna Pangesti; Nelly Puspandari; Subangkit; Triyani Soekarso; Vivi Setiawaty                                                                         |
| EPI_ISL_3151609, EPI_ISL_3151616, EPI_ISL_3151623, EPI_ISL_3151630, EPI_ISL_3151636, EPI_ISL_3151643, EPI_ISL_3151676                                                                                                                                                                                                                                                                                                                                                                                                                                                                                                                                                                                                                                                                                                                                                                                                                                                                                                                                                                                                                                                                                                                                                                                                                                                                                                                                                                                                                                                                                                                                                                                                                                                                                                                                                                                                                                                                                                                                                                                                                               | see above                               | BPOM Makassar                                                                    | National Institute of Health Research and Development                                                                                                                                                                      | Arie Ardiansyah Nugraha; Fajar Nur Sulistiyohadi; Hana Aparsi Pawestri; Hartanti Dian Ikwati; Kartika Dewi Puspa; Krisna Pangesti; Nelly Puspandari; Subangkit; Triyani Soekarso; Vivi Setiawaty                                                                         |
| EPI_ISL_1257855,<br>EPI_ISL_5441860,<br>EPI_ISL_5441861,<br>EPI_ISL_5441862                                                                                                                                                                                                                                                                                                                                                                                                                                                                                                                                                                                                                                                                                                                                                                                                                                                                                                                                                                                                                                                                                                                                                                                                                                                                                                                                                                                                                                                                                                                                                                                                                                                                                                                                                                                                                                                                                                                                                                                                                                                                         | BPOM Mamuju                             | National Institute of Health Research and Development                            | Arie Ardiansyah Nugraha; Fajar Nur Sulistiyohadi; Hana Aparsi Pawestri; Hartanti Dian Ikwati; Kartika Dewi Puspa; Krisna Pangesti; Nelly Puspandari; Subangkit; Triyani Soekarso; Vivi Setiawaty                           |                                                                                                                                                                                                                                                                          |
| EPI_ISL_2854753, EPI_ISL_2854754, EPI_ISL_2854755, EPI_ISL_2854756, EPI_ISL_2868929, EPI_ISL_2987580, EPI_ISL_2987581, EPI_ISL_2987582, EPI_ISL_2987583, EPI_ISL_3019943                                                                                                                                                                                                                                                                                                                                                                                                                                                                                                                                                                                                                                                                                                                                                                                                                                                                                                                                                                                                                                                                                                                                                                                                                                                                                                                                                                                                                                                                                                                                                                                                                                                                                                                                                                                                                                                                                                                                                                            | see above                               | BPMP Aceh                                                                        | National Institute of Health Research and Development                                                                                                                                                                      | Arie Ardiansyah Nugraha; Fajar Nur Sulistiyohadi; Hana Aparsi Pawestri; Hartanti Dian Ikwati; Kartika Dewi Puspa; Krisna Pangesti; Nelly Puspandari; Subangkit; Triyani Soekarso; Vivi Setiawaty                                                                         |
| EPI_ISL_2101216, EPI_ISL_2101217, EPI_ISL_2101218, EPI_ISL_2101219, EPI_ISL_2101220, EPI_ISL_2101221, EPI_ISL_2101222, EPI_ISL_2101223, EPI_ISL_2101224, EPI_ISL_2101225, EPI_ISL_2101226, EPI_ISL_2101227, EPI_ISL_2101228                                                                                                                                                                                                                                                                                                                                                                                                                                                                                                                                                                                                                                                                                                                                                                                                                                                                                                                                                                                                                                                                                                                                                                                                                                                                                                                                                                                                                                                                                                                                                                                                                                                                                                                                                                                                                                                                                                                         | see above                               | BRSU Tabanan                                                                     | Eijkman Institute for Molecular Biology, National Agency for Research and Innovation; Molecular Biology Laboratory, Faculty Medicine and Health Sciences, Warmadewa University                                             | Amin Soebandrio; Edison Johar; Ery Sintya; Frilasita A Yudhaputri; Hidayat Trimarsanto; I Wayan Duta Krisna; Iskandar Adnan; Khin Saw Myint; Lidwina Priliani; Lydia V. Panggalo; Muhammad Rezki Rasyak; Safarina G Malik; Sri Maseny; Sukma Oktavianthi; Willy Agustine |
| EPI_ISL_1202186,<br>EPI_ISL_1137600                                                                                                                                                                                                                                                                                                                                                                                                                                                                                                                                                                                                                                                                                                                                                                                                                                                                                                                                                                                                                                                                                                                                                                                                                                                                                                                                                                                                                                                                                                                                                                                                                                                                                                                                                                                                                                                                                                                                                                                                                                                                                                                 | BSL3 Laboratory, Bogor, West Java       | Biosafety Level-3 Laboratory, Indonesian Institute of Sciences (LIPI)            | Anggia Prasetyoputri; Eko Wahyu Putro; Gita Syahputra; Isa Nuryana; Rath Asmana Ningrum; Sri Swasthikawati; Sugiyono Saputra; Syam Budi Iryanto                                                                            |                                                                                                                                                                                                                                                                          |
| EPI_ISL_3138875, EPI_ISL_3138876, EPI_ISL_3138877, EPI_ISL_3138878, EPI_ISL_3138879, EPI_ISL_3138880, EPI_ISL_3138881, EPI_ISL_3138882, EPI_ISL_3138883, EPI_ISL_3138884                                                                                                                                                                                                                                                                                                                                                                                                                                                                                                                                                                                                                                                                                                                                                                                                                                                                                                                                                                                                                                                                                                                                                                                                                                                                                                                                                                                                                                                                                                                                                                                                                                                                                                                                                                                                                                                                                                                                                                            | see above                               | BTKL PP Ambon                                                                    | National Institute of Health Research and Development                                                                                                                                                                      | Arie Ardiansyah Nugraha; Fajar Nur Sulistiyohadi; Hana Aparsi Pawestri; Hartanti Dian Ikwati; Kartika Dewi Puspa; Krisna Pangesti; Nelly Puspandari; Subangkit; Triyani Soekarso; Vivi Setiawaty                                                                         |
| EPI_ISL_3138886, EPI_ISL_3138887, EPI_ISL_3138888, EPI_ISL_3138889, EPI_ISL_3138890, EPI_ISL_3138891, EPI_ISL_3138892, EPI_ISL_3138893, EPI_ISL_4254900, EPI_ISL_4254901, EPI_ISL_4254902, EPI_ISL_4254903, EPI_ISL_4254904, EPI_ISL_4254905, EPI_ISL_4254906, EPI_ISL_4254907, EPI_ISL_4254908, EPI_ISL_4254909, EPI_ISL_4254910, EPI_ISL_4254911, EPI_ISL_4254912, EPI_ISL_4254913, EPI_ISL_4254914, EPI_ISL_4254915, EPI_ISL_4254916, EPI_ISL_4254917, EPI_ISL_4254918, EPI_ISL_4254919, EPI_ISL_4254920, EPI_ISL_4254921, EPI_ISL_4254922, EPI_ISL_4254923, EPI_ISL_4254924, EPI_ISL_4254925, EPI_ISL_4254926, EPI_ISL_4254927, EPI_ISL_4254928, EPI_ISL_4254929, EPI_ISL_4254930, EPI_ISL_4254931, EPI_ISL_4254932, EPI_ISL_4254933, EPI_ISL_4254934, EPI_ISL_4254935, EPI_ISL_4254936, EPI_ISL_4254937, EPI_ISL_4254938, EPI_ISL_4254939, EPI_ISL_4254940, EPI_ISL_4254941, EPI_ISL_4254942, EPI_ISL_4254943, EPI_ISL_4254944, EPI_ISL_4254945, EPI_ISL_4254946, EPI_ISL_4254947, EPI_ISL_4254948, EPI_ISL_4254949, EPI_ISL_4254950, EPI_ISL_4254951, EPI_ISL_4254952, EPI_ISL_4254953, EPI_ISL_4254954, EPI_ISL_4254955, EPI_ISL_4254956, EPI_ISL_4254957, EPI_ISL_4254958, EPI_ISL_4254959, EPI_ISL_4254960, EPI_ISL_4254961, EPI_ISL_4254962, EPI_ISL_4254963, EPI_ISL_4254964, EPI_ISL_4254965, EPI_ISL_4254966, EPI_ISL_4254967, EPI_ISL_4254968, EPI_ISL_4254969, EPI_ISL_4254970, EPI_ISL_4254971, EPI_ISL_4254972, EPI_ISL_4254973, EPI_ISL_4254974, EPI_ISL_4254975, EPI_ISL_4254976, EPI_ISL_4254977, EPI_ISL_4254978, EPI_ISL_4254979, EPI_ISL_4254980, EPI_ISL_4254981, EPI_ISL_4254982, EPI_ISL_4254983, EPI_ISL_4254984, EPI_ISL_4254985, EPI_ISL_4254986, EPI_ISL_4254987, EPI_ISL_4254988, EPI_ISL_4254989, EPI_ISL_4254990, EPI_ISL_4254991, EPI_ISL_4254992, EPI_ISL_4254993, EPI_ISL_4254994, EPI_ISL_4254995, EPI_ISL_4254996, EPI_ISL_4254997, EPI_ISL_4254998, EPI_ISL_4254999, EPI_ISL_4255000, EPI_ISL_4255001, EPI_ISL_4255002, EPI_ISL_4255003, EPI_ISL_4255004, EPI_ISL_4255005, EPI_ISL_4255006, EPI_ISL_4255007, EPI_ISL_4255008, EPI_ISL_4255009, EPI_ISL_4255010, EPI_ISL_4255011, EPI_ISL_4255012, EPI_ISL_42 |                                         |                                                                                  |                                                                                                                                                                                                                            |                                                                                                                                                                                                                                                                          |

|                                                                                                                                                                                                                                                                                                                                                                                                                                                                                                                                                                                                                                                                                                                                                                                                                                                                                                                                                                                                                                                                                                                                                                   |                                                                            |                                                                                                       |                                                                                                                                                                                                                                                                                                                                                      |                                                                                                                                                                                                                                                                                                                                                          |
|-------------------------------------------------------------------------------------------------------------------------------------------------------------------------------------------------------------------------------------------------------------------------------------------------------------------------------------------------------------------------------------------------------------------------------------------------------------------------------------------------------------------------------------------------------------------------------------------------------------------------------------------------------------------------------------------------------------------------------------------------------------------------------------------------------------------------------------------------------------------------------------------------------------------------------------------------------------------------------------------------------------------------------------------------------------------------------------------------------------------------------------------------------------------|----------------------------------------------------------------------------|-------------------------------------------------------------------------------------------------------|------------------------------------------------------------------------------------------------------------------------------------------------------------------------------------------------------------------------------------------------------------------------------------------------------------------------------------------------------|----------------------------------------------------------------------------------------------------------------------------------------------------------------------------------------------------------------------------------------------------------------------------------------------------------------------------------------------------------|
| EPI_ISL_3267186, EPI_ISL_4056009, EPI_ISL_4056011, EPI_ISL_4056012                                                                                                                                                                                                                                                                                                                                                                                                                                                                                                                                                                                                                                                                                                                                                                                                                                                                                                                                                                                                                                                                                                | Balai Besar Laboratorium Kesehatan - Center for Health Laboratory Surabaya | Institute of Tropical Disease, Universitas Airlangga                                                  | Adi Pramono Hendrata; Aldise M Nastri; Gatot Soegiarto; Jezzy R Dewantari; Kazufumi Shimizu; Kohar Hari Santoso; Krisnoadi Rahardjo; Laksmi Wulandari; Maria I Lusida; Resti Yudhawati; Rima R Prasetya; Soetjipto; Yasuko Mori                                                                                                                      |                                                                                                                                                                                                                                                                                                                                                          |
| EPI_ISL_791988                                                                                                                                                                                                                                                                                                                                                                                                                                                                                                                                                                                                                                                                                                                                                                                                                                                                                                                                                                                                                                                                                                                                                    | Balai Besar POM Semarang                                                   | National Institute of Health Research and Development                                                 | AA; Aryanti; HA; HD; Ikawati; KD; KNA; N; Nugraha; Pangesti; Pawestri; Puspa; Puspandari; Setiawaty; Soekarso; Subangkit; T; V                                                                                                                                                                                                                       |                                                                                                                                                                                                                                                                                                                                                          |
| EPI_ISL_2537486, EPI_ISL_2537488, EPI_ISL_2537489, EPI_ISL_2537491, EPI_ISL_2537492, EPI_ISL_2538126, EPI_ISL_2543614, EPI_ISL_2543668, EPI_ISL_2544800, EPI_ISL_2544801, EPI_ISL_2558705, EPI_ISL_2558706, EPI_ISL_2558707, EPI_ISL_2558708, EPI_ISL_2558709, EPI_ISL_2558710, EPI_ISL_2558711, EPI_ISL_2558712, EPI_ISL_2558714, EPI_ISL_2558716, EPI_ISL_2558717, EPI_ISL_2558721, EPI_ISL_2558722, EPI_ISL_2558723, EPI_ISL_2558724, EPI_ISL_2558725, EPI_ISL_2558726, EPI_ISL_2558727, EPI_ISL_2558728, EPI_ISL_2558729, EPI_ISL_2558730, EPI_ISL_2558731, EPI_ISL_2558736, EPI_ISL_2558737                                                                                                                                                                                                                                                                                                                                                                                                                                                                                                                                                                  | see above                                                                  | Balai Besar Penelitian dan Pengembangan dan Reservoir Penyakit, Salatiga                              | Genomik Solidaritas Indonesia Laboratorium                                                                                                                                                                                                                                                                                                           | Alfin Mohammad Abdillah; Anindya Pradipta Susanto; Annisa Muthiah Sukirman; Anuraj Shankar; Ariel Pradipta; Budi Wiweko; Carissa Sintca Wijaya; Dhahlia Agustina Cahyono; Gracia Felias Enos Korompis; Joko Waluyo; Louisa Markus; Meutia Ayuputeri Kumaheri; Normastuti Adhini Tantygo; Pratiwi Sudarmono; Vania Gavrla Wikasa; Yudistira Aditya Rahmat |
| EPI_ISL_1020199                                                                                                                                                                                                                                                                                                                                                                                                                                                                                                                                                                                                                                                                                                                                                                                                                                                                                                                                                                                                                                                                                                                                                   | Balai Besar Rehabilitasi (BNN)                                             | Biosafety Level-3 Laboratory, Indonesian Institute of Sciences (LIPI)                                 | Alfi T. Fathurahman; Idris; Linda Sukmarini; Masrukhin; Ratih Asmana Ningrum; Ruby Setiawan; Sri Swasthikawati; Suglyono Saputra                                                                                                                                                                                                                     |                                                                                                                                                                                                                                                                                                                                                          |
| EPI_ISL_775599                                                                                                                                                                                                                                                                                                                                                                                                                                                                                                                                                                                                                                                                                                                                                                                                                                                                                                                                                                                                                                                                                                                                                    | Balai Besar Veteriner Maros                                                | National Institute of Health Research and Development                                                 | AA; HA; HD; Ikawati; KD; KNA; Mangidi; Muflihanah; N; Nugraha; Pangesti; Pawestri; Puspa; Puspandari; R; Setiawaty; Soekarso; Subangkit; T; V                                                                                                                                                                                                        |                                                                                                                                                                                                                                                                                                                                                          |
| EPI_ISL_753698                                                                                                                                                                                                                                                                                                                                                                                                                                                                                                                                                                                                                                                                                                                                                                                                                                                                                                                                                                                                                                                                                                                                                    | Balai Besar Veteriner Maros, Sulawesi Selatan                              | National Institute of Health Research and Development                                                 | AA; HA; HD; Ikawati; KD; KNA; Mangidi; Muflihanah; N; Nugraha; Pangesti; Pawestri; Puspa; Puspandari; R; Setiawaty; Soekarso; Subangkit; T; V                                                                                                                                                                                                        |                                                                                                                                                                                                                                                                                                                                                          |
| EPI_ISL_4847177                                                                                                                                                                                                                                                                                                                                                                                                                                                                                                                                                                                                                                                                                                                                                                                                                                                                                                                                                                                                                                                                                                                                                   | Balai Kesehatan Masyarakat AHD Klaten                                      | Balai Laboratorium Kesehatan Dan Pengujian Alat Kesehatan Provinsi Jawa Tengah                        | Alia Wijayanti; Dwi Nursetyaasih; Dyah Ayu; Endah Wahyu Y; Ismi Farhati; Purnomo; Sekti Handayani; Wiwik Peni; Yekti Hediningsih                                                                                                                                                                                                                     |                                                                                                                                                                                                                                                                                                                                                          |
| EPI_ISL_4756054, EPI_ISL_4756056                                                                                                                                                                                                                                                                                                                                                                                                                                                                                                                                                                                                                                                                                                                                                                                                                                                                                                                                                                                                                                                                                                                                  | Balai Kesehatan Masyarakat Klaten                                          | Balai Laboratorium Kesehatan Dan Pengujian Alat Kesehatan Provinsi Jawa Tengah                        | Alia Wijayanti; Dwi Nursetyaasih; Dyah Ayu; Endah Wahyu Y; Ismi Farhati; Purnomo; Sekti Handayani; Wiwik Peni; Yekti Hediningsih                                                                                                                                                                                                                     |                                                                                                                                                                                                                                                                                                                                                          |
| EPI_ISL_5616256, EPI_ISL_5616267, EPI_ISL_5616292, EPI_ISL_5616301, EPI_ISL_5616334, EPI_ISL_5616344, EPI_ISL_5616363, EPI_ISL_5616472, EPI_ISL_5616512                                                                                                                                                                                                                                                                                                                                                                                                                                                                                                                                                                                                                                                                                                                                                                                                                                                                                                                                                                                                           | see above                                                                  | Balai Kesehatan Masyarakat Klaten                                                                     | Balai Laboratorium Kesehatan dan Pengujian Alat Kesehatan Provinsi Jawa Tengah                                                                                                                                                                                                                                                                       | Alia Wijayanti; Dwi Nursetyaasih; Dyah Ayu; Endah Wahyu Y; Ismi Farhati; Purnomo; Sekti Handayani; Wiwik Peni; Yekti Hediningsih                                                                                                                                                                                                                         |
| EPI_ISL_4826927, EPI_ISL_4829453, EPI_ISL_4847261, EPI_ISL_4847415                                                                                                                                                                                                                                                                                                                                                                                                                                                                                                                                                                                                                                                                                                                                                                                                                                                                                                                                                                                                                                                                                                | Balai Kesehatan Masyarakat Klaten AHD                                      | Balai Laboratorium Kesehatan Dan Pengujian Alat Kesehatan Provinsi Jawa Tengah                        | Alia Wijayanti; Dwi Nursetyaasih; Dyah Ayu; Endah Wahyu Y; Ismi Farhati; Purnomo; Sekti Handayani; Wiwik Peni; Yekti Hediningsih                                                                                                                                                                                                                     |                                                                                                                                                                                                                                                                                                                                                          |
| EPI_ISL_5616484                                                                                                                                                                                                                                                                                                                                                                                                                                                                                                                                                                                                                                                                                                                                                                                                                                                                                                                                                                                                                                                                                                                                                   | Balai Kesehatan Masyarakat Semarang                                        | Balai Laboratorium Kesehatan dan Pengujian Alat Kesehatan Provinsi Jawa Tengah                        | Alia Wijayanti; Dwi Nursetyaasih; Dyah Ayu; Endah Wahyu Y; Ismi Farhati; Purnomo; Sekti Handayani; Wiwik Peni; Yekti Hediningsih                                                                                                                                                                                                                     |                                                                                                                                                                                                                                                                                                                                                          |
| EPI_ISL_4824126                                                                                                                                                                                                                                                                                                                                                                                                                                                                                                                                                                                                                                                                                                                                                                                                                                                                                                                                                                                                                                                                                                                                                   | Balai Kesehatan Masyarakat Semarang BPSDM                                  | Balai Laboratorium Kesehatan Dan Pengujian Alat Kesehatan Provinsi Jawa Tengah                        | Alia Wijayanti; Dwi Nursetyaasih; Dyah Ayu; Endah Wahyu Y; Ismi Farhati; Purnomo; Sekti Handayani; Wiwik Peni; Yekti Hediningsih                                                                                                                                                                                                                     |                                                                                                                                                                                                                                                                                                                                                          |
| EPI_ISL_4826621                                                                                                                                                                                                                                                                                                                                                                                                                                                                                                                                                                                                                                                                                                                                                                                                                                                                                                                                                                                                                                                                                                                                                   | Balai Kkesehatan Masyarakat Klaten AHD                                     | Balai Laboratorium Kesehatan Dan Pengujian Alat Kesehatan Provinsi Jawa Tengah                        | Alia Wijayanti; Dwi Nursetyaasih; Dyah Ayu; Endah Wahyu Y; Ismi Farhati; Purnomo; Sekti Handayani; Wiwik Peni; Yekti Hediningsih                                                                                                                                                                                                                     |                                                                                                                                                                                                                                                                                                                                                          |
| EPI_ISL_791978                                                                                                                                                                                                                                                                                                                                                                                                                                                                                                                                                                                                                                                                                                                                                                                                                                                                                                                                                                                                                                                                                                                                                    | Balai Labkes Lampung                                                       | National Institute of Health Research and Development                                                 | AA; HA; HD; Ikawati; KD; KNA; L; N; Nugraha; Pangesti; Pawestri; Puspa; Puspandari; Setiawaty; Soekarso; Subangkit; T; V; Yurina                                                                                                                                                                                                                     |                                                                                                                                                                                                                                                                                                                                                          |
| EPI_ISL_791981                                                                                                                                                                                                                                                                                                                                                                                                                                                                                                                                                                                                                                                                                                                                                                                                                                                                                                                                                                                                                                                                                                                                                    | Balai Litbang Aceh                                                         | National Institute of Health Research and Development                                                 | AA; E; F; Fitria; HA; HD; Ichwansyah; Ikawati; KD; KNA; N; Nugraha; Pangesti; Pawestri; Puspa; Puspandari; Setiawaty; Soekarso; Subangkit; T; V                                                                                                                                                                                                      |                                                                                                                                                                                                                                                                                                                                                          |
| EPI_ISL_1257818, EPI_ISL_1257819, EPI_ISL_1257820, EPI_ISL_1257821, EPI_ISL_1257822                                                                                                                                                                                                                                                                                                                                                                                                                                                                                                                                                                                                                                                                                                                                                                                                                                                                                                                                                                                                                                                                               | Balai Litbangkes Papua                                                     | National Institute of Health Research and Development                                                 | Antonius Octavian; Arie Ardiansyah Nugraha; Hana Apsari Pawestri; Hartanti Dian Ikawati; Hotma Sitompul; Kartika Dewi Puspa; Krisna Pangesti; Nelly Puspandari; Subangkit; Vivi Setiawaty                                                                                                                                                            |                                                                                                                                                                                                                                                                                                                                                          |
| EPI_ISL_1257830, EPI_ISL_1257831, EPI_ISL_2047561, EPI_ISL_2047562, EPI_ISL_2047563, EPI_ISL_2047564, EPI_ISL_2047565, EPI_ISL_2047566, EPI_ISL_2047567, EPI_ISL_2047568, EPI_ISL_2047569                                                                                                                                                                                                                                                                                                                                                                                                                                                                                                                                                                                                                                                                                                                                                                                                                                                                                                                                                                         | see above                                                                  | Balai Litbangkes Tanah Bumbu                                                                          | National Institute of Health Research and Development                                                                                                                                                                                                                                                                                                | Arie Ardiansyah Nugraha; Hana Apsari Pawestri; Hartanti Dian Ikawati; Juhairiyah; Kartika Dewi Puspa; Krisna Pangesti; Nelly Puspandari; Subangkit; Syarif Hidayat; Triyani Soekarso; Vivi Setiawaty                                                                                                                                                     |
| EPI_ISL_4090578, EPI_ISL_4090579, EPI_ISL_4090580, EPI_ISL_4090581, EPI_ISL_4090582                                                                                                                                                                                                                                                                                                                                                                                                                                                                                                                                                                                                                                                                                                                                                                                                                                                                                                                                                                                                                                                                               | Balai Penelitian Dan Pengembangan kesehatan Tanah Bumbu                    | National Institute of Health Research and Development                                                 | Arie Ardiansyah Nugraha; Fajar Nur Sulistiyohadi; Hana Apsari Pawestri; Hartanti Dian Ikawati; Kartika Dewi Puspa; Krisna Pangesti; Nelly Puspandari; Subangkit; Triyani Soekarso; Vivi Setiawaty                                                                                                                                                    |                                                                                                                                                                                                                                                                                                                                                          |
| EPI_ISL_3394979, EPI_ISL_3394980, EPI_ISL_3394981, EPI_ISL_3394982, EPI_ISL_3394983, EPI_ISL_3394984, EPI_ISL_3394985, EPI_ISL_3394986, EPI_ISL_3394987, EPI_ISL_3394988, EPI_ISL_3394989, EPI_ISL_3394990, EPI_ISL_3394991, EPI_ISL_3394992, EPI_ISL_3394993, EPI_ISL_3394994, EPI_ISL_3394995, EPI_ISL_3394996, EPI_ISL_3394997, EPI_ISL_3394998, EPI_ISL_3394999, EPI_ISL_3395000, EPI_ISL_3395001, EPI_ISL_3395002, EPI_ISL_3395003, EPI_ISL_3395004, EPI_ISL_3395005, EPI_ISL_3395006, EPI_ISL_3395007                                                                                                                                                                                                                                                                                                                                                                                                                                                                                                                                                                                                                                                       | see above                                                                  | Balai Penelitian dan Pengembangan Aceh                                                                | National Institute of Health Research and Development                                                                                                                                                                                                                                                                                                | Arie Ardiansyah Nugraha; Fahmi Ichwansyah; Hana Apsari Pawestri; Hartanti Dian Ikawati; Kartika Dewi Puspa; Krisna Pangesti; Nelly Puspandari; Subangkit; Triyani Soekarso; Vivi Setiawaty                                                                                                                                                               |
| EPI_ISL_538506, EPI_ISL_538507, EPI_ISL_538512, EPI_ISL_1048406                                                                                                                                                                                                                                                                                                                                                                                                                                                                                                                                                                                                                                                                                                                                                                                                                                                                                                                                                                                                                                                                                                   | Balai Penelitian dan Pengembangan Biomedis Papua                           | National Institute of Health Research and Development                                                 | A; AA; Anton Oktavianus; Arie Ardiansyah Nugraha; HA; HD; HML; Hana Apsari Pawestri; Hartanti Dian Ikawati; Hotma Sitompul; Hutapea; Ikawati; KD; KNA; Kartika Dewi Puspa; Krisna Nur Andriana Pangesti; M; Nelly Puspandari; Nugraha; Oktavian; Paisal; Pangesti; Pasaribu; Pawestri; Puspa; Setiawaty, V.; Soekarso; Subangkit; T; Vivi Setiawaty. |                                                                                                                                                                                                                                                                                                                                                          |
| EPI_ISL_5107675, EPI_ISL_5107676, EPI_ISL_5107677, EPI_ISL_5107678, EPI_ISL_5107679, EPI_ISL_5107680, EPI_ISL_5107681, EPI_ISL_5107682, EPI_ISL_5107683, EPI_ISL_5107684, EPI_ISL_5107685, EPI_ISL_5107686, EPI_ISL_5107687, EPI_ISL_5107688, EPI_ISL_5107689, EPI_ISL_5107690, EPI_ISL_5107691, EPI_ISL_5107692, EPI_ISL_5107693, EPI_ISL_5107694, EPI_ISL_5107695, EPI_ISL_5107696, EPI_ISL_5107697, EPI_ISL_5107698, EPI_ISL_5107699, EPI_ISL_5107700, EPI_ISL_5107701, EPI_ISL_5107702, EPI_ISL_5107703, EPI_ISL_5107704, EPI_ISL_5107705, EPI_ISL_5107706, EPI_ISL_5107707, EPI_ISL_5107708, EPI_ISL_5107709, EPI_ISL_5107710, EPI_ISL_5107711, EPI_ISL_5107712, EPI_ISL_5107713, EPI_ISL_5107714, EPI_ISL_5107715                                                                                                                                                                                                                                                                                                                                                                                                                                           | see above                                                                  | Balai Penelitian dan Pengembangan Kesehatan Papua                                                     | National Institute of Health Research and Development                                                                                                                                                                                                                                                                                                | Antonius Oktavian; Choirul Huda; Clara Imaniar; Hana Apsari Pawestri; Hana Krismawati; Hartanti Dian Ikawati; Hotma Hutapea; Moh.Fadri Rokhmad; Ratna Tanjung; Sophia M.Yansip; Tri wahyuni; Triyani Soekarso; Vivi Setiawaty; Yuli Arisanti; Yustinus Maladan                                                                                           |
| EPI_ISL_4730586, EPI_ISL_4730587, EPI_ISL_4730588, EPI_ISL_4730592, EPI_ISL_4730593, EPI_ISL_4730594, EPI_ISL_4730595, EPI_ISL_4730596, EPI_ISL_4730597, EPI_ISL_4730598, EPI_ISL_5022694, EPI_ISL_5022695, EPI_ISL_5022696, EPI_ISL_5022697, EPI_ISL_5022698, EPI_ISL_5022699, EPI_ISL_5022700, EPI_ISL_5022701, EPI_ISL_5022702, EPI_ISL_5022703, EPI_ISL_5022704, EPI_ISL_5022705, EPI_ISL_5022706, EPI_ISL_5022707, EPI_ISL_5107858, EPI_ISL_5107859, EPI_ISL_5107860, EPI_ISL_5107861, EPI_ISL_5107862, EPI_ISL_5107863, EPI_ISL_5107864, EPI_ISL_5107865, EPI_ISL_5107866, EPI_ISL_5107867                                                                                                                                                                                                                                                                                                                                                                                                                                                                                                                                                                  | see above                                                                  | Balai Pengawas Obat Dan Makanan Ambon                                                                 | National Institute of Health Research and Development                                                                                                                                                                                                                                                                                                | Arie Ardiansyah Nugraha; Fajar Nur; Fajar Nur Sulistiyohadi; Hana Apsari Pawestri; Hartanti Dian Ikawati; Kartika Dewi Puspa; Krisna Pangesti; Nelly Puspandari; Subangkit; Sulistiyohadi; Triyani Soekarso; Vivi Setiawaty                                                                                                                              |
| EPI_ISL_1915572, EPI_ISL_1915573, EPI_ISL_1915574, EPI_ISL_1915575                                                                                                                                                                                                                                                                                                                                                                                                                                                                                                                                                                                                                                                                                                                                                                                                                                                                                                                                                                                                                                                                                                | Balitbang Tanah Bumbu                                                      | National Institute of Health Research and Development                                                 | Arie Ardiansyah Nugraha; Hana Apsari Pawestri; Hartanti Dian Ikawati; Kartika Dewi Puspa; Krisna Pangesti; Nelly Puspandari; Subangkit; Vivi Setiawaty                                                                                                                                                                                               |                                                                                                                                                                                                                                                                                                                                                          |
| EPI_ISL_775594                                                                                                                                                                                                                                                                                                                                                                                                                                                                                                                                                                                                                                                                                                                                                                                                                                                                                                                                                                                                                                                                                                                                                    | Balitvet Lampung                                                           | National Institute of Health Research and Development                                                 | AA; E; EA; HA; HD; Ikawati; KD; KNA; N; Nugraha; Pangesti; Pawestri; Puspa; Puspandari; Saswiyanti; Setiawaty; Soekarso; Srihanto; Subangkit; T; V                                                                                                                                                                                                   |                                                                                                                                                                                                                                                                                                                                                          |
| EPI_ISL_4885303, EPI_ISL_4885304, EPI_ISL_4885305, EPI_ISL_4885306, EPI_ISL_4885307, EPI_ISL_4885308, EPI_ISL_4885309, EPI_ISL_4885310, EPI_ISL_4885311, EPI_ISL_4885312, EPI_ISL_4885313, EPI_ISL_4885314, EPI_ISL_4885315, EPI_ISL_4885316, EPI_ISL_4885317, EPI_ISL_4885318, EPI_ISL_4885319, EPI_ISL_4885320, EPI_ISL_4885321, EPI_ISL_4885322                                                                                                                                                                                                                                                                                                                                                                                                                                                                                                                                                                                                                                                                                                                                                                                                                | see above                                                                  | Bandung Health Laboratory                                                                             | West Java Health Laboratory                                                                                                                                                                                                                                                                                                                          | Azzania Fibriani; Cut Nur Cinthia Alamanda; Ema Rahmawati; Isak Solihin; Karimatu Khoirunnisa; Miftahul Faridi; Rifky Waluyajati Rachman; Rini Robiani; Ryan Bayusantika Ristandi                                                                                                                                                                        |
| EPI_ISL_4885323, EPI_ISL_4885324, EPI_ISL_4885325, EPI_ISL_4885326, EPI_ISL_4885327, EPI_ISL_4885328, EPI_ISL_4885329, EPI_ISL_4885330, EPI_ISL_4885331, EPI_ISL_4885332, EPI_ISL_4885333                                                                                                                                                                                                                                                                                                                                                                                                                                                                                                                                                                                                                                                                                                                                                                                                                                                                                                                                                                         | see above                                                                  | Bandung Health Polytechnic                                                                            | West Java Health Laboratory                                                                                                                                                                                                                                                                                                                          | Azzania Fibriani; Cut Nur Cinthia Alamanda; Ema Rahmawati; Isak Solihin; Karimatu Khoirunnisa; Miftahul Faridi; Rifky Waluyajati Rachman; Rini Robiani; Ryan Bayusantika Ristandi                                                                                                                                                                        |
| EPI_ISL_5328474, EPI_ISL_5328475, EPI_ISL_5328476, EPI_ISL_5328477, EPI_ISL_5328478, EPI_ISL_5328479, EPI_ISL_5328480, EPI_ISL_5328481, EPI_ISL_5328482, EPI_ISL_5328483, EPI_ISL_5328484, EPI_ISL_5328485, EPI_ISL_5328486, EPI_ISL_5328487, EPI_ISL_5328488, EPI_ISL_5328489, EPI_ISL_5328490, EPI_ISL_5328491, EPI_ISL_5328492                                                                                                                                                                                                                                                                                                                                                                                                                                                                                                                                                                                                                                                                                                                                                                                                                                 | see above                                                                  | Bandung Health Polytechnic                                                                            | West Java Health Laboratory; School of Life Sciences and Technology, Institut Teknologi Bandung                                                                                                                                                                                                                                                      | Azzania Fibriani; Cut Nur Cinthia Alamanda; Ema Rahmawati; Karimatu Khoirunnisa; Miftahul Faridi; Rifky Waluyajati Rachman; Rini Robiani; Ryan Bayusantika Ristandi                                                                                                                                                                                      |
| EPI_ISL_1615587, EPI_ISL_1615656, EPI_ISL_1633339, EPI_ISL_1634465, EPI_ISL_1660472                                                                                                                                                                                                                                                                                                                                                                                                                                                                                                                                                                                                                                                                                                                                                                                                                                                                                                                                                                                                                                                                               | Bandung Public Health                                                      | West Java Health Laboratory; School of Life Sciences and Technology, Institut Teknologi Bandung       | Aulia Saraswati Wicaksono; Azzania Fibriani; Cut Nur Cinthia Alamanda; Ema Rahmawati; Karimatu Khoirunnisa; Miftahul Faridi; Rifky Waluyajati Rachman; Rini Robiani; Ryan Bayusantika Ristandi                                                                                                                                                       |                                                                                                                                                                                                                                                                                                                                                          |
| EPI_ISL_1072964                                                                                                                                                                                                                                                                                                                                                                                                                                                                                                                                                                                                                                                                                                                                                                                                                                                                                                                                                                                                                                                                                                                                                   | Bhayangkara Hospital Medan                                                 | Institute of Tropical Disease, Universitas Airlangga; Faculty of Medicine, Universitas Sumatera Utara | Aldise M Nastri; Franciscus Ginting; Inke N D Lubis; Irbah R Nainggolan; Jezzy R Dewantari; Kazufumi Shimizu; Krisnoadi Rahardjo; Maria I Lusida; Meliani; Mirzan Hasibuan; Muhammad Ichwan; R Andika D Cahyadi; R Lia Kusumawati; Ramadhan Bestari; Rima R Prasetya; Soetjipto; Yasuko Mori                                                         |                                                                                                                                                                                                                                                                                                                                                          |
| EPI_ISL_1069153                                                                                                                                                                                                                                                                                                                                                                                                                                                                                                                                                                                                                                                                                                                                                                                                                                                                                                                                                                                                                                                                                                                                                   | Binjai Health Office                                                       | Institute of Tropical Disease, Universitas Airlangga; Fakultas Kedokteran, Universitas Sumatra Utara  | Aldise M Nastri; Franciscus Ginting; Inke N D Lubis; Irbah R Nainggolan; Jezzy R Dewantari; Kazufumi Shimizu; Krisnoadi Rahardjo; Maria I Lusida; Meliani; Mirzan Hasibuan; Muhammad Ichwan; R Andika D Cahyadi; R Lia Kusumawati; Ramadhan Bestari; Rima R Prasetya; Soetjipto; Yasuko Mori                                                         |                                                                                                                                                                                                                                                                                                                                                          |
| EPI_ISL_4004656, EPI_ISL_4004657, EPI_ISL_4004658                                                                                                                                                                                                                                                                                                                                                                                                                                                                                                                                                                                                                                                                                                                                                                                                                                                                                                                                                                                                                                                                                                                 | Biosafety Level 3 Laboratory BRIN                                          | National Research and Innovation Agency (BRIN-Indonesia)                                              | Ahmad Randy; Akhrita Atikana; Aliyatur Rosyidah; Beti E. Dewi; Dian F. Agustiyani; Hariyatun; Herjuno A. Nugroho; Lucia D. Antika; Marissa Angelina; Masrukhin; Popi H. Wisnuwardhani; Ratih A. Ningrum; Suglyono Saputra; Syaiful Rizal; Syam B. Iryanto                                                                                            |                                                                                                                                                                                                                                                                                                                                                          |
| EPI_ISL_747238                                                                                                                                                                                                                                                                                                                                                                                                                                                                                                                                                                                                                                                                                                                                                                                                                                                                                                                                                                                                                                                                                                                                                    | Bogor Public Health                                                        | West Java Health Laboratory; School of Life Sciences and Technology, Institut Teknologi Bandung       | Azzania Fibriani; Cut Nur Cinthia Alamanda; Ema Rahmawati; Isak Solihin; Karimatu Khoirunnisa; Miftahul Faridi; Rifky Waluyajati Rachman; Rini Robiani; Ryan Bayusantika Ristandi                                                                                                                                                                    |                                                                                                                                                                                                                                                                                                                                                          |
| EPI_ISL_5328534, EPI_ISL_5328535, EPI_ISL_5328536                                                                                                                                                                                                                                                                                                                                                                                                                                                                                                                                                                                                                                                                                                                                                                                                                                                                                                                                                                                                                                                                                                                 | Bogor Regional Hospital                                                    | West Java Health Laboratory; School of Life Sciences and Technology, Institut Teknologi Bandung       | Azzania Fibriani; Cut Nur Cinthia Alamanda; Ema Rahmawati; Karimatu Khoirunnisa; Miftahul Faridi; Rifky Waluyajati Rachman; Rini Robiani; Ryan Bayusantika Ristandi                                                                                                                                                                                  |                                                                                                                                                                                                                                                                                                                                                          |
| EPI_ISL_3188923, EPI_ISL_3188924, EPI_ISL_3188925, EPI_ISL_3188926, EPI_ISL_3188927, EPI_ISL_3188928, EPI_ISL_3188929, EPI_ISL_3188930, EPI_ISL_3188931, EPI_ISL_3188932, EPI_ISL_3188933, EPI_ISL_3188934, EPI_ISL_3188935, EPI_ISL_3188936, EPI_ISL_3188937, EPI_ISL_3188938, EPI_ISL_3188939, EPI_ISL_3188940, EPI_ISL_3188941, EPI_ISL_3188942, EPI_ISL_3188943, EPI_ISL_3188944, EPI_ISL_3200768, EPI_ISL_3200769, EPI_ISL_3200770, EPI_ISL_3200771, EPI_ISL_3200772, EPI_ISL_3200773, EPI_ISL_3200774, EPI_ISL_3200775, EPI_ISL_3200776, EPI_ISL_3200777, EPI_ISL_3200778, EPI_ISL_3200779, EPI_ISL_3200780, EPI_ISL_3200781, EPI_ISL_3200782, EPI_ISL_3200783, EPI_ISL_3200784, EPI_ISL_3200785, EPI_ISL_3200786, EPI_ISL_3200787, EPI_ISL_3200788, EPI_ISL_3200789, EPI_ISL_3200790, EPI_ISL_3200791, EPI_ISL_3200792, EPI_ISL_3200793, EPI_ISL_3200794, EPI_ISL_3200795, EPI_ISL_3200796, EPI_ISL_3200797, EPI_ISL_3200798, EPI_ISL_3200799, EPI_ISL_3200800, EPI_ISL_3200801, EPI_ISL_3200802, EPI_ISL_3200803, EPI_ISL_3200804, EPI_ISL_3200805, EPI_ISL_3200806, EPI_ISL_3200807, EPI_ISL_3200808, EPI_ISL_3200809, EPI_ISL_3200810, EPI_ISL_3200811, | see above                                                                  | Bandung Health Polytechnic                                                                            | West Java Health Laboratory; School of Life Sciences and Technology, Institut Teknologi Bandung                                                                                                                                                                                                                                                      | Azzania Fibriani; Cut Nur Cinthia Alamanda; Ema Rahmawati; Karimatu Khoirunnisa; Miftahul Faridi; Rifky Waluyajati Rachman; Rini Robiani; Ryan Bayusantika Ristandi                                                                                                                                                                                      |

|                                                                                                                                                                                                                                                                                                                                                                                                                                                                                                                                                                                                                                                                                                                                          |                                                               |                                                                                                                                                                                                                                                                                                                                                                                                                                                                                     |                                                                                                                                                                                                                                                                                                                                                                                                    |
|------------------------------------------------------------------------------------------------------------------------------------------------------------------------------------------------------------------------------------------------------------------------------------------------------------------------------------------------------------------------------------------------------------------------------------------------------------------------------------------------------------------------------------------------------------------------------------------------------------------------------------------------------------------------------------------------------------------------------------------|---------------------------------------------------------------|-------------------------------------------------------------------------------------------------------------------------------------------------------------------------------------------------------------------------------------------------------------------------------------------------------------------------------------------------------------------------------------------------------------------------------------------------------------------------------------|----------------------------------------------------------------------------------------------------------------------------------------------------------------------------------------------------------------------------------------------------------------------------------------------------------------------------------------------------------------------------------------------------|
| EPI_ISL_3200812, EPI_ISL_3200813, EPI_ISL_3200814, EPI_ISL_3200815, EPI_ISL_3200816, EPI_ISL_3200817, EPI_ISL_3200818, EPI_ISL_3200819                                                                                                                                                                                                                                                                                                                                                                                                                                                                                                                                                                                                   | Genomik Solidaritas Indonesia Laboratorium                    |                                                                                                                                                                                                                                                                                                                                                                                                                                                                                     | Anna Christina Brazilia; Annisa Muthiah Sukirman; Anuraj Shankar; Ariel Pradipta; Ayodhia Pitaloka Pasaribu; Beni Satria; Carissa Sintca; Carissa Sintca Wijaya; Decy Subekti; Eka Airlangga; Gracia Felias Enos Korompis; Hendri Wijaya; Louisa Markus; Meutia Ayuputeri Kumaher; Mutiara; Raph Hamers; Suwarti; Vania Gavrilla Wikasa; Vania Gavrilla Wikasa                                     |
| see above                                                                                                                                                                                                                                                                                                                                                                                                                                                                                                                                                                                                                                                                                                                                | Bunda Thamrin Hospital / EIKMAN OXFORD CLINICAL RESEARCH UNIT |                                                                                                                                                                                                                                                                                                                                                                                                                                                                                     |                                                                                                                                                                                                                                                                                                                                                                                                    |
| EPI_ISL_2931797                                                                                                                                                                                                                                                                                                                                                                                                                                                                                                                                                                                                                                                                                                                          | CIPAKU KOTA BOGOR                                             | National Institute of Health Research and Development                                                                                                                                                                                                                                                                                                                                                                                                                               | ; Arie Ardiansyah Nugraha; Hana Apsari Pawestri; Hartanti Dian Ikawati; Kartika Dewi Puspa; Krisna Pangesti; Nelly Puspandari; Subangkit; Triyani Soekarso; Vivi Setiawaty                                                                                                                                                                                                                         |
| EPI_ISL_5328539, EPI_ISL_5328540, EPI_ISL_5328541                                                                                                                                                                                                                                                                                                                                                                                                                                                                                                                                                                                                                                                                                        | Ciamis Public Health                                          | West Java Health Laboratory; School of Life Sciences and Technology, Institut Teknologi Bandung                                                                                                                                                                                                                                                                                                                                                                                     | Azzania Fibriani; Cut Nur Cinthia Alamanda; Ema Rahmawati; Karimatu Khoirunnisa; Miftahul Faridi; Rifky Waluyajati Rachman; Rini Robiani; Ryan Bayusantika Ristandi                                                                                                                                                                                                                                |
| EPI_ISL_1346485, EPI_ISL_1398367, EPI_ISL_1398565, EPI_ISL_1398939, EPI_ISL_1398942, EPI_ISL_1398955, EPI_ISL_1398983                                                                                                                                                                                                                                                                                                                                                                                                                                                                                                                                                                                                                    | see above                                                     | Cianjur Public Health                                                                                                                                                                                                                                                                                                                                                                                                                                                               | Azzania Fibriani; Cut Nur Cinthia Alamanda; Ema Rahmawati; Isak Solihin; Kamila Tania; Karimatu Khoirunnisa; Miftahul Faridi; Rifky Waluyajati Rachman; Rini Robiani; Ryan Bayusantika Ristandi                                                                                                                                                                                                    |
| EPI_ISL_1634474                                                                                                                                                                                                                                                                                                                                                                                                                                                                                                                                                                                                                                                                                                                          | Cimahi Public Health                                          | West Java Health Laboratory; School of Life Sciences and Technology, Institut Teknologi Bandung                                                                                                                                                                                                                                                                                                                                                                                     | Aulia Saraswati Wicaksono; Azzania Fibriani; Cut Nur Cinthia Alamanda; Ema Rahmawati; Karimatu Khoirunnisa; Miftahul Faridi; Rifky Waluyajati Rachman; Rini Robiani; Ryan Bayusantika Ristandi                                                                                                                                                                                                     |
| EPI_ISL_1534697, EPI_ISL_1534698, EPI_ISL_1534699, EPI_ISL_1534700, EPI_ISL_2106982                                                                                                                                                                                                                                                                                                                                                                                                                                                                                                                                                                                                                                                      | Ciputra Hospital Citra Garden City                            | National Institute of Health Research and Development                                                                                                                                                                                                                                                                                                                                                                                                                               | Arie Ardiansyah Nugraha; Hana Apsari Pawestri; Hartanti Dian Ikawati; Kartika Dewi Puspa; Krisna Pangesti; Nelly Puspandari; Subangkit; Vivi Setiawaty                                                                                                                                                                                                                                             |
| EPI_ISL_2364584                                                                                                                                                                                                                                                                                                                                                                                                                                                                                                                                                                                                                                                                                                                          | Ciputra Hospital Citra Raya Tangerang                         | Eijkman Institute for Molecular Biology, National Agency for Research and Innovation                                                                                                                                                                                                                                                                                                                                                                                                | Amin Soebandrio; Edison Johar; Frilasita A Yudhaputri; Hidayat Trimarsanto; Iskandar Adnan; Khin Saw Myint; Lidwina Priliani; Lydia V. Panggalo; Muhammad Rezki Rasyak; Safarina G Malik; Sukma Oktavianthi; Willy Agustine                                                                                                                                                                        |
| EPI_ISL_5417758, EPI_ISL_5417759, EPI_ISL_5417760, EPI_ISL_5417761, EPI_ISL_5417762, EPI_ISL_5417763                                                                                                                                                                                                                                                                                                                                                                                                                                                                                                                                                                                                                                     | Cirebon Gunung Jati Regional Hospital                         | West Java Health Laboratory; School of Life Sciences and Technology, Institut Teknologi Bandung                                                                                                                                                                                                                                                                                                                                                                                     | Azzania Fibriani; Cut Nur Cinthia Alamanda; Ema Rahmawati; Karimatu Khoirunnisa; Miftahul Faridi; Rifky Waluyajati Rachman; Rini Robiani; Ryan Bayusantika Ristandi                                                                                                                                                                                                                                |
| EPI_ISL_877422, EPI_ISL_1795059                                                                                                                                                                                                                                                                                                                                                                                                                                                                                                                                                                                                                                                                                                          | Citra Medika Hospital                                         | Institute of Tropical Disease, Universitas Airlangga                                                                                                                                                                                                                                                                                                                                                                                                                                | Aldise M Nastri; Gatot Soegiarto; Jezzy R Dewantari; Kazufumi Shimizu; Krisnoadi Rahardjo; Laksmi Wulandari; Maria I Lusida; Resti Yudhawati; Rima R Prasetya; Soetjipto; Wahidah Rachmaniyah; Yasuko Mori                                                                                                                                                                                         |
| EPI_ISL_1248934, EPI_ISL_1249610, EPI_ISL_1250222, EPI_ISL_1258423, EPI_ISL_1258424, EPI_ISL_1258463, EPI_ISL_1258464, EPI_ISL_1258465, EPI_ISL_1263319, EPI_ISL_1263320, EPI_ISL_1263321, EPI_ISL_1263322, EPI_ISL_1630278, EPI_ISL_1630279, EPI_ISL_1630280, EPI_ISL_1630281, EPI_ISL_2691912, EPI_ISL_2692142, EPI_ISL_2692143, EPI_ISL_2692144, EPI_ISL_2692169, EPI_ISL_2692170, EPI_ISL_2692171, EPI_ISL_2692179, EPI_ISL_2692205, EPI_ISL_2692206, EPI_ISL_2692533, EPI_ISL_2692706, EPI_ISL_2692880, EPI_ISL_2692882, EPI_ISL_2692886, EPI_ISL_2692887, EPI_ISL_2692889, EPI_ISL_2692891, EPI_ISL_2692892, EPI_ISL_2692896, EPI_ISL_2692897, EPI_ISL_2692899, EPI_ISL_2692900, EPI_ISL_2692902, EPI_ISL_2692903, EPI_ISL_2692905 | see above                                                     | Clinical Microbiology Lab RSPTN Universitas Hasanuddin                                                                                                                                                                                                                                                                                                                                                                                                                              | Gita Vita Soraya; Handayani; Handayani Halik; Muhammad Nasrum Massi; Muhammad Yusuf Usman; Rizalinda Sjahri; Rufika Shari; Triwibawa                                                                                                                                                                                                                                                               |
| EPI_ISL_747194, EPI_ISL_1122422, EPI_ISL_1122423, EPI_ISL_1122424, EPI_ISL_2692207, EPI_ISL_2692909, EPI_ISL_2692981, EPI_ISL_2692983, EPI_ISL_2692986, EPI_ISL_2692987, EPI_ISL_2692989, EPI_ISL_2692990, EPI_ISL_2692991, EPI_ISL_2692992, EPI_ISL_2692993, EPI_ISL_2692994, EPI_ISL_2692995, EPI_ISL_2993340, EPI_ISL_2993341, EPI_ISL_2993432, EPI_ISL_2993433, EPI_ISL_2993434, EPI_ISL_2993539, EPI_ISL_2993632, EPI_ISL_2993633, EPI_ISL_2993658, EPI_ISL_2993659, EPI_ISL_3000155, EPI_ISL_3456060, EPI_ISL_4847411, EPI_ISL_4847413, EPI_ISL_5054899, EPI_ISL_5054915, EPI_ISL_5054918                                                                                                                                          | see above                                                     | Clinical Microbiology Laboratory, Faculty of Medicine, Universitas Indonesia                                                                                                                                                                                                                                                                                                                                                                                                        | Andi Yasmon; Anis Karuniawati; Augustine Natasha; Dewi LF; Erni J. Nelwan; Faculty of Medicine; Febriani R; Fera Ibrahim; Fithriyah; Fithriyah; Ibrahim F; Karuniawati A; Makhtaromi A; Natasha A; Nurzhah I; Pratiwi Sudarmono; Rahmawaty RG; Saharman YR; Sudarmono P.; Syarurachman A; Universitas Indonesia; Yasmon A; Yulia Rosa Saharman; Ilnical Microbiology Laboratory                    |
| EPI_ISL_1196774, EPI_ISL_1196792, EPI_ISL_1196793, EPI_ISL_1196795, EPI_ISL_1196798, EPI_ISL_2835609, EPI_ISL_2835610, EPI_ISL_2835643, EPI_ISL_2835644, EPI_ISL_2835645, EPI_ISL_2835646, EPI_ISL_2835647, EPI_ISL_2835648, EPI_ISL_2835649, EPI_ISL_2835650, EPI_ISL_2835651, EPI_ISL_2835652, EPI_ISL_2835653, EPI_ISL_2835654, EPI_ISL_2835655, EPI_ISL_2835656, EPI_ISL_2835657, EPI_ISL_2835658, EPI_ISL_3503134, EPI_ISL_3503135, EPI_ISL_3534497, EPI_ISL_3534498, EPI_ISL_3534500, EPI_ISL_3534501, EPI_ISL_3534502, EPI_ISL_3534505, EPI_ISL_3534508, EPI_ISL_3534510, EPI_ISL_3534513, EPI_ISL_3534514, EPI_ISL_3534515, EPI_ISL_3534516, EPI_ISL_3534517, EPI_ISL_3534518, EPI_ISL_3534519, EPI_ISL_3534520                  | see above                                                     | Clinical Microbiology Laboratory, Faculty of Medicine, Universitas Indonesia                                                                                                                                                                                                                                                                                                                                                                                                        | Andi Yasmon; Anis Karuniawati; Ari Fahrial Syam; Augustine Natasha; Badriul Hegar; Beti Ernawati; Beti Ernawati dewi; Budi Wiweko; Dwiana Ocyvianti; Fadilah; Fera Ibrahim; Fithriyah; Hana Apsari Pawestri; Khaerunisa Anbar Istiadi; Linda Erlina; Pratiwi Sudarmono; Rafika Indah Paramita; Vivi Setiawaty; Yulia Rosa                                                                          |
| EPI_ISL_4392617                                                                                                                                                                                                                                                                                                                                                                                                                                                                                                                                                                                                                                                                                                                          | Clinical Pathology Laboratory, RSUP Dr. Hasan Sadikin         | Eijkman Institute for Molecular Biology, National Agency for Research and Innovation                                                                                                                                                                                                                                                                                                                                                                                                | Amin Soebandrio; Edison Johar; Frilasita A Yudhaputri; Hidayat Trimarsanto; Iskandar Adnan; Jessica R Saragih; Khin Saw Myint; Lidwina Priliani; Lydia V Panggalo; Muhammad Rezki Rasyak; Safarina G Malik; Sukma Oktavianthi; Willy Agustine                                                                                                                                                      |
| EPI_ISL_3466962, EPI_ISL_3466968, EPI_ISL_3466974, EPI_ISL_3466979, EPI_ISL_3466986, EPI_ISL_3550572, EPI_ISL_3550574, EPI_ISL_3550575, EPI_ISL_3550576, EPI_ISL_3550577, EPI_ISL_3550578, EPI_ISL_3550579, EPI_ISL_3550580, EPI_ISL_3550581, EPI_ISL_3550582, EPI_ISL_3550583, EPI_ISL_3550584, EPI_ISL_3550585, EPI_ISL_3550586, EPI_ISL_3550587, EPI_ISL_3550588, EPI_ISL_3550589, EPI_ISL_3550590, EPI_ISL_3550591, EPI_ISL_3550592, EPI_ISL_3550593, EPI_ISL_3550594, EPI_ISL_3550595, EPI_ISL_3550596, EPI_ISL_3550597, EPI_ISL_3550598, EPI_ISL_3550599, EPI_ISL_3550600, EPI_ISL_3550601, EPI_ISL_3550602, EPI_ISL_3550603, EPI_ISL_3550604, EPI_ISL_3550605                                                                     | see above                                                     | Clinical Pathology Laboratory, RSUP Dr. Hasan Sadikin                                                                                                                                                                                                                                                                                                                                                                                                                               | Amin Soebandrio; Edison Johar; Frilasita A Yudhaputri; Hidayat Trimarsanto; Iskandar Adnan; Jessica R. Saragih; Khin Saw Myint; Lidwina Priliani; Lydia V. Panggalo; Muhammad Rezki Rasyak; Safarina G Malik; Sukma Oktavianthi; Willy Agustine                                                                                                                                                    |
| EPI_ISL_1247019                                                                                                                                                                                                                                                                                                                                                                                                                                                                                                                                                                                                                                                                                                                          | Clinical microbiology lab, RSPTN Universitas Hasanuddin       | Clinical microbiology lab, RSPTN Universitas Hasanuddin                                                                                                                                                                                                                                                                                                                                                                                                                             | Gita Vita Soraya; Handayani; Muhammad Nasrum Massi; Muhammad Yusuf Usman; Rizalinda Sjahri; Rufika Shari; Triwibawa                                                                                                                                                                                                                                                                                |
| EPI_ISL_1335896                                                                                                                                                                                                                                                                                                                                                                                                                                                                                                                                                                                                                                                                                                                          | Columbia Asia Hospital Medan                                  | Faculty of Medicine, Universitas Sumatera Utara; Institute of Tropical Disease, Universitas Airlangga                                                                                                                                                                                                                                                                                                                                                                               | Aldise M Nastri; Franciscus Ginting; Inke N D Lubis; Irbah R Nainggolan; Jezzy R Dewantari; Kazufumi Shimizu; Krisnoadi Rahardjo; Maria I Lusida; Meliani; Mirzan Hasibuan; Muhammad Ichwan; R Andika D Cahyadi; R Lia Kusumawati; Ramadhan Bestari; Rima R Prasetya; Soetjipto; Yasuko Mori                                                                                                       |
| EPI_ISL_1020204                                                                                                                                                                                                                                                                                                                                                                                                                                                                                                                                                                                                                                                                                                                          | DD Klinik Ciputat, South Tangerang, Banten                    | Biosafety Level-3 Laboratory, Indonesian Institute of Sciences (LIPI)                                                                                                                                                                                                                                                                                                                                                                                                               | Anggia Prasetyoputri; Eko Wahyu Putro; Fahrurrozi; Isa Nuryana; Rath Asmana Ningrum; Sri Swasthikawati; Sugiyono Saputra; Syam Budi Iryanto                                                                                                                                                                                                                                                        |
| EPI_ISL_3092457, EPI_ISL_3092464, EPI_ISL_3098445, EPI_ISL_3098759                                                                                                                                                                                                                                                                                                                                                                                                                                                                                                                                                                                                                                                                       | DINAS KESEHATAN DKI JAKARTA                                   | Genomik Solidaritas Indonesia Laboratorium                                                                                                                                                                                                                                                                                                                                                                                                                                          | Alfin Mohammad Abdillah; Annisa Muthiah Sukirman; Anuraj Shankar; Ariel Pradipta; Carissa Sintca Wijaya; Dhahlia Agustina Cahyono; Dwi Oktavia; Gracia Felias Enos Korompis; Meutia Ayuputeri Kumaheri; Mohammad Anang Syarifudin; Ngabila Salama; Normastuti Adhini Tanty; Prati Vindha; Vania Gavrilla Wikasa; Widyastuti                                                                        |
| EPI_ISL_2964704, EPI_ISL_2964706                                                                                                                                                                                                                                                                                                                                                                                                                                                                                                                                                                                                                                                                                                         | DINKES KAB. GROBOGAN                                          | Genetics Working Group (Pokja Genetik) Faculty of Medicine, Public Health and Nursing Universitas Gadjah Mada (FK-KMK UGM); Disease Investigation Center Wates Ministry of Agriculture Indonesia; Department of Microbiology FK-KMK UGM; Laboratorium Diagnostik Yayasan Tahjia World Mosquito Program (WMP) Yogyakarta Center for Tropical Medicine FK-KMK UGM; Integrated Research Center FK-KMK UGM; Department of Computer Science and Electronics FMIPA UGM; RSUP Dr. Sardjito | Afiahayati; Dwi AA Nugrahaningsih; Dwi Indaryati; Dyah A Puspitarani; Edwin W. Daniwijaya; Eggi Arguni; Endah Supriyati; Gunadi; Hana F Hanifin; Hendra Wibawa; Indarto Sulistiyono; Irene Tania; Kristy Iskandar; Ludhang P. Rizki; Marcellus; Mohamad S. Hakim; Nungki Anggorowati; Pramesti G Dewi; Siswanto; Susan Simanjaya; Titik Nuryastuti; Tri Wibawa                                     |
| EPI_ISL_2964697, EPI_ISL_2964700                                                                                                                                                                                                                                                                                                                                                                                                                                                                                                                                                                                                                                                                                                         | DINKES KAB. JEPARA                                            | Genetics Working Group (Pokja Genetik) Faculty of Medicine, Public Health and Nursing Universitas Gadjah Mada (FK-KMK UGM); Disease Investigation Center Wates Ministry of Agriculture Indonesia; Department of Microbiology FK-KMK UGM; Laboratorium Diagnostik Yayasan Tahjia World Mosquito Program (WMP) Yogyakarta Center for Tropical Medicine FK-KMK UGM; Integrated Research Center FK-KMK UGM; Department of Computer Science and Electronics FMIPA UGM; RSUP Dr. Sardjito | Afiahayati; Alvina A Setiawan; Cita S Amalia; Dwi AA Nugrahaningsih; Dwi Indaryati; Edwin W. Daniwijaya; Eggi Arguni; Endah Supriyati; Gunadi; Hendra Wibawa; Indarto Sulistiyono; Khanza a Vujira; Kristy Iskandar; Ludhang P. Rizki; Marcellus; Mohamad S. Hakim; Nungki Anggorowati; Pramesti G Dewi; Siswanto; Titik Nuryastuti; Tri Wibawa                                                    |
| EPI_ISL_2931771, EPI_ISL_2931780, EPI_ISL_2931787                                                                                                                                                                                                                                                                                                                                                                                                                                                                                                                                                                                                                                                                                        | DINKES KOTA BOGOR                                             | National Institute of Health Research and Development                                                                                                                                                                                                                                                                                                                                                                                                                               | ; Arie Ardiansyah Nugraha; Hana Apsari Pawestri; Hartanti Dian Ikawati; Kartika Dewi Puspa; Krisna Pangesti; Nelly Puspandari; Subangkit; Triyani Soekarso; Vivi Setiawaty                                                                                                                                                                                                                         |
| EPI_ISL_2868916, EPI_ISL_2868918                                                                                                                                                                                                                                                                                                                                                                                                                                                                                                                                                                                                                                                                                                         | DINKES Kab Bogor                                              | National Institute of Health Research and Development                                                                                                                                                                                                                                                                                                                                                                                                                               | Arie Ardiansyah Nugraha; Hana Apsari Pawestri; Hartanti Dian Ikawati; Kartika Dewi Puspa; Krisna Pangesti; Nelly Puspandari; Subangkit; Triyani Soekarso; Vivi Setiawaty                                                                                                                                                                                                                           |
| EPI_ISL_2617550, EPI_ISL_2617551, EPI_ISL_2617552, EPI_ISL_2617553, EPI_ISL_2617554                                                                                                                                                                                                                                                                                                                                                                                                                                                                                                                                                                                                                                                      | DINKES Kab TAPIN KalSel                                       | National Institute of Health Research and Development                                                                                                                                                                                                                                                                                                                                                                                                                               | Arie Ardiansyah Nugraha; Hana Apsari Pawestri; Hartanti Dian Ikawati; Kartika Dewi Puspa; Krisna Pangesti; Nelly Puspandari; Subangkit; Triyani Soekarso; Vivi Setiawaty                                                                                                                                                                                                                           |
| EPI_ISL_2932712                                                                                                                                                                                                                                                                                                                                                                                                                                                                                                                                                                                                                                                                                                                          | DINKES Kota Waringin Barat Kalteng                            | National Institute of Health Research and Development                                                                                                                                                                                                                                                                                                                                                                                                                               | ; Arie Ardiansyah Nugraha; Hana Apsari Pawestri; Hartanti Dian Ikawati; Kartika Dewi Puspa; Krisna Pangesti; Nelly Puspandari; Subangkit; Triyani Soekarso; Vivi Setiawaty                                                                                                                                                                                                                         |
| EPI_ISL_2854762, EPI_ISL_2868937, EPI_ISL_2868939, EPI_ISL_2868941, EPI_ISL_2868942, EPI_ISL_2868944, EPI_ISL_2896196                                                                                                                                                                                                                                                                                                                                                                                                                                                                                                                                                                                                                    | see above                                                     | DINKES Prov Kalimantan Timur                                                                                                                                                                                                                                                                                                                                                                                                                                                        | Arie Ardiansyah Nugraha; Hana Apsari Pawestri; Hartanti Dian Ikawati; Kartika Dewi Puspa; Krisna Pangesti; Nelly Puspandari; Subangkit; Triyani Soekarso; Vivi Setiawaty                                                                                                                                                                                                                           |
| EPI_ISL_4730546, EPI_ISL_4730547, EPI_ISL_4730548, EPI_ISL_4730549, EPI_ISL_4730550, EPI_ISL_4730551, EPI_ISL_4730552, EPI_ISL_4730553, EPI_ISL_4730554                                                                                                                                                                                                                                                                                                                                                                                                                                                                                                                                                                                  | see above                                                     | DINKES Provinsi Jambi                                                                                                                                                                                                                                                                                                                                                                                                                                                               | Arie Ardiansyah Nugraha; Fajar Nur; Fajar Nur Sulistiyohadi; Hana Apsari Pawestri; Hartanti Dian Ikawati; Kartika Dewi Puspa; Krisna Pangesti; Nelly Puspandari; Subangkit; Sulistiyohadi; Triyani Soekarso; Vivi Setiawaty                                                                                                                                                                        |
| EPI_ISL_4730536, EPI_ISL_4730537, EPI_ISL_4730538, EPI_ISL_4730539, EPI_ISL_4730540, EPI_ISL_4730541, EPI_ISL_4730542, EPI_ISL_4730543, EPI_ISL_4730544, EPI_ISL_4730545                                                                                                                                                                                                                                                                                                                                                                                                                                                                                                                                                                 | see above                                                     | DINKES Rejang Lebong Bengkulu                                                                                                                                                                                                                                                                                                                                                                                                                                                       | Arie Ardiansyah Nugraha; Fajar Nur; Hana Apsari Pawestri; Hartanti Dian Ikawati; Kartika Dewi Puspa; Krisna Pangesti; Nelly Puspandari; Subangkit; Sulistiyohadi; Triyani Soekarso; Vivi Setiawaty                                                                                                                                                                                                 |
| EPI_ISL_2954684                                                                                                                                                                                                                                                                                                                                                                                                                                                                                                                                                                                                                                                                                                                          | DKK Gunungkidul/ Puskesmas Girisubo                           | Genetics Working Group (Pokja Genetik) Faculty of Medicine, Public Health and Nursing Universitas Gadjah Mada (FK-KMK UGM); Disease Investigation Center Wates Ministry of Agriculture Indonesia; Department of Microbiology FK-KMK UGM; Laboratorium Diagnostik Yayasan Tahjia World Mosquito Program (WMP) Yogyakarta Center for Tropical Medicine FK-KMK UGM; Integrated Research Center FK-KMK UGM; Department of Computer Science and Electronics FMIPA UGM; RSUP Dr. Sardjito | Afiahayati; Alvina A Setiawan; Cita S Amalia; Dwi AA Nugrahaningsih; Dwi Indaryati; Edwin W. Daniwijaya; Eggi Arguni; Endah Supriyati; Gunadi; Hendra Wibawa; Indarto Sulistiyono; Kristy Iskandar; Ludhang P. Rizki; Marcellus; Mohamad S. Hakim; Nungki Anggorowati; Pramesti G Dewi; Siswanto; Titik Nuryastuti; Tri Wibawa                                                                     |
| EPI_ISL_2955335, EPI_ISL_2955586, EPI_ISL_2955597, EPI_ISL_2955598                                                                                                                                                                                                                                                                                                                                                                                                                                                                                                                                                                                                                                                                       | DKK Gunungkidul/ Puskesmas Karangmoyo I                       | Genetics Working Group (Pokja Genetik) Faculty of Medicine, Public Health and Nursing Universitas Gadjah Mada (FK-KMK UGM); Disease Investigation Center Wates Ministry of Agriculture Indonesia; Department of Microbiology FK-KMK UGM; Laboratorium Diagnostik Yayasan Tahjia World Mosquito Program (WMP) Yogyakarta Center for Tropical Medicine FK-KMK UGM; Integrated Research Center FK-KMK UGM; Department of Computer Science and Electronics                              | Afiahayati; Alvina A Setiawan; Dwi AA Nugrahaningsih; Dwi Indaryati; Dyah A Puspitarani; Edwin W. Daniwijaya; Eggi Arguni; Endah Supriyati; Gunadi; Hana F Hanifin; Hendra Wibawa; Indarto Sulistiyono; Irene Tania; Khanza a Vujira; Kristy Iskandar; Ludhang P. Rizki; Marcellus; Mohamad S. Hakim; Nungki Anggorowati; Pramesti G Dewi; Siswanto; Susan Simanjaya; Titik Nuryastuti; Tri Wibawa |



[illegible]

|                                                                                                                                                                                                                                                                                                                                                                                                                                                                                                                                                                                                                                                                                                                                                                                                                                                                                                                                                                                                                                                                                                                                                                                                                                                                                                                                                                                                                                                                                                                                                                                                                                                                                                                                                                                                                                                                                                                                                                                                                                                                                                                                                                                                                                                                                                                                                                                                                                                                                                                                                                                                                                                                                                                                                                                                                                                                                                                                                                                                                                                                                                                                                                                                                                                                                                                                                                                                                                                                                                                                                                                                                                                                                                                                                                                                                                                                                                                                                                                                                                                                                                                                                                                                                                                                                                                                                                                                                                                                                                                                                                                                                                                                                                                                                                                                                                                                                                                                                                                                                                                                                                                                                                                                                                                                                                                                                                                                                                                                                                                                                                                                                                                                                                                                                                                                                                                                                                                                                                                                                                                                                                                                                                                                                                                                                                                                                                                                                                                                                                                                                                                                                                                                                                                                                                                                                                                                                                                                                                                                                                                                                                                                                                                                                                                                                                                                                                                                                                                                                                                                                                                                                                                                                                                                                                                                                                                                                                                                                                                                                                                                                                                                                                                                                                                                                                                                                                                                                                                                                                                                                                                                                                                                                                                                                                                                                                                                                                                                                                                                                                                                                                                                                                                                                                                                                                                                                                                                                                                                                                                                                                                                                                                                                                                                                                                                                                                                                                                                                                                                                                                                                                                                                                                                                                                                                                                                                                                                                                                                                                                                                                                                                                                                                                                                                                                                                                                                                                                                                                                                                                                                                                                                                                                                                                                                                                                                                                                                                                                                                                                                                                                                                                                                                                                                                                                                                                                                                                                                                                                                                                                                                                                                                                                                                                                                                                                                              |                                                 |                                                                                                                                                                                                                 |                                                                                                                                                                                                                                                                                                                                                                                                                                             |
|----------------------------------------------------------------------------------------------------------------------------------------------------------------------------------------------------------------------------------------------------------------------------------------------------------------------------------------------------------------------------------------------------------------------------------------------------------------------------------------------------------------------------------------------------------------------------------------------------------------------------------------------------------------------------------------------------------------------------------------------------------------------------------------------------------------------------------------------------------------------------------------------------------------------------------------------------------------------------------------------------------------------------------------------------------------------------------------------------------------------------------------------------------------------------------------------------------------------------------------------------------------------------------------------------------------------------------------------------------------------------------------------------------------------------------------------------------------------------------------------------------------------------------------------------------------------------------------------------------------------------------------------------------------------------------------------------------------------------------------------------------------------------------------------------------------------------------------------------------------------------------------------------------------------------------------------------------------------------------------------------------------------------------------------------------------------------------------------------------------------------------------------------------------------------------------------------------------------------------------------------------------------------------------------------------------------------------------------------------------------------------------------------------------------------------------------------------------------------------------------------------------------------------------------------------------------------------------------------------------------------------------------------------------------------------------------------------------------------------------------------------------------------------------------------------------------------------------------------------------------------------------------------------------------------------------------------------------------------------------------------------------------------------------------------------------------------------------------------------------------------------------------------------------------------------------------------------------------------------------------------------------------------------------------------------------------------------------------------------------------------------------------------------------------------------------------------------------------------------------------------------------------------------------------------------------------------------------------------------------------------------------------------------------------------------------------------------------------------------------------------------------------------------------------------------------------------------------------------------------------------------------------------------------------------------------------------------------------------------------------------------------------------------------------------------------------------------------------------------------------------------------------------------------------------------------------------------------------------------------------------------------------------------------------------------------------------------------------------------------------------------------------------------------------------------------------------------------------------------------------------------------------------------------------------------------------------------------------------------------------------------------------------------------------------------------------------------------------------------------------------------------------------------------------------------------------------------------------------------------------------------------------------------------------------------------------------------------------------------------------------------------------------------------------------------------------------------------------------------------------------------------------------------------------------------------------------------------------------------------------------------------------------------------------------------------------------------------------------------------------------------------------------------------------------------------------------------------------------------------------------------------------------------------------------------------------------------------------------------------------------------------------------------------------------------------------------------------------------------------------------------------------------------------------------------------------------------------------------------------------------------------------------------------------------------------------------------------------------------------------------------------------------------------------------------------------------------------------------------------------------------------------------------------------------------------------------------------------------------------------------------------------------------------------------------------------------------------------------------------------------------------------------------------------------------------------------------------------------------------------------------------------------------------------------------------------------------------------------------------------------------------------------------------------------------------------------------------------------------------------------------------------------------------------------------------------------------------------------------------------------------------------------------------------------------------------------------------------------------------------------------------------------------------------------------------------------------------------------------------------------------------------------------------------------------------------------------------------------------------------------------------------------------------------------------------------------------------------------------------------------------------------------------------------------------------------------------------------------------------------------------------------------------------------------------------------------------------------------------------------------------------------------------------------------------------------------------------------------------------------------------------------------------------------------------------------------------------------------------------------------------------------------------------------------------------------------------------------------------------------------------------------------------------------------------------------------------------------------------------------------------------------------------------------------------------------------------------------------------------------------------------------------------------------------------------------------------------------------------------------------------------------------------------------------------------------------------------------------------------------------------------------------------------------------------------------------------------------------------------------------------------------------------------------------------------------------------------------------------------------------------------------------------------------------------------------------------------------------------------------------------------------------------------------------------------------------------------------------------------------------------------------------------------------------------------------------------------------------------------------------------------------------------------------------------------------------------------------------------------------------------------------------------------------------------------------------------------------------------------------------------------------------------------------------------------------------------------------------------------------------------------------------------------------------------------------------------------------------------------------------------------------------------------------------------------------------------------------------------------------------------------------------------------------------------------------------------------------------------------------------------------------------------------------------------------------------------------------------------------------------------------------------------------------------------------------------------------------------------------------------------------------------------------------------------------------------------------------------------------------------------------------------------------------------------------------------------------------------------------------------------------------------------------------------------------------------------------------------------------------------------------------------------------------------------------------------------------------------------------------------------------------------------------------------------------------------------------------------------------------------------------------------------------------------------------------------------------------------------------------------------------------------------------------------------------------------------------------------------------------------------------------------------------------------------------------------------------------------------------------------------------------------------------------------------------------------------------------------------------------------------------------------------------------------------------------------------------------------------------------------------------------------------------------------------------------------------------------------------------------------------------------------------------------------------------------------------------------------------------------------------------------------------------------------------------------------------------------------------------------------------------------------------------------------------------------------------------------------------------------------------------------------------------------------------------------------------------------------------------------------------------------------------------------------------------------------------------------------------------------------------------------------------------------------------------------------------------------------------------------------------------------------------------------------------------------------------------------|-------------------------------------------------|-----------------------------------------------------------------------------------------------------------------------------------------------------------------------------------------------------------------|---------------------------------------------------------------------------------------------------------------------------------------------------------------------------------------------------------------------------------------------------------------------------------------------------------------------------------------------------------------------------------------------------------------------------------------------|
| EPI_ISL_2931733,<br>EPI_ISL_2931741,<br>EPI_ISL_2931751,<br>EPI_ISL_2931760                                                                                                                                                                                                                                                                                                                                                                                                                                                                                                                                                                                                                                                                                                                                                                                                                                                                                                                                                                                                                                                                                                                                                                                                                                                                                                                                                                                                                                                                                                                                                                                                                                                                                                                                                                                                                                                                                                                                                                                                                                                                                                                                                                                                                                                                                                                                                                                                                                                                                                                                                                                                                                                                                                                                                                                                                                                                                                                                                                                                                                                                                                                                                                                                                                                                                                                                                                                                                                                                                                                                                                                                                                                                                                                                                                                                                                                                                                                                                                                                                                                                                                                                                                                                                                                                                                                                                                                                                                                                                                                                                                                                                                                                                                                                                                                                                                                                                                                                                                                                                                                                                                                                                                                                                                                                                                                                                                                                                                                                                                                                                                                                                                                                                                                                                                                                                                                                                                                                                                                                                                                                                                                                                                                                                                                                                                                                                                                                                                                                                                                                                                                                                                                                                                                                                                                                                                                                                                                                                                                                                                                                                                                                                                                                                                                                                                                                                                                                                                                                                                                                                                                                                                                                                                                                                                                                                                                                                                                                                                                                                                                                                                                                                                                                                                                                                                                                                                                                                                                                                                                                                                                                                                                                                                                                                                                                                                                                                                                                                                                                                                                                                                                                                                                                                                                                                                                                                                                                                                                                                                                                                                                                                                                                                                                                                                                                                                                                                                                                                                                                                                                                                                                                                                                                                                                                                                                                                                                                                                                                                                                                                                                                                                                                                                                                                                                                                                                                                                                                                                                                                                                                                                                                                                                                                                                                                                                                                                                                                                                                                                                                                                                                                                                                                                                                                                                                                                                                                                                                                                                                                                                                                                                                                                                                                                                                  | Utara (RSUD Tarakan)<br>Dinkes Provinsi Lampung | National Institute of Health Research and Development                                                                                                                                                           | Arie Ardiansyah Nugraha; Hana Aparsi Pawestri; Hartanti Dian Ikawati; Kartika Dewi Puspa; Krisna Pangesti; Nelly Puspandari; Subangkit; Triyani Soekarso; Vivi Setiawaty                                                                                                                                                                                                                                                                    |
| EPI_ISL_3375297, EPI_ISL_3375298, EPI_ISL_3375299, EPI_ISL_3375300, EPI_ISL_3375301, EPI_ISL_3375302, EPI_ISL_3375303, EPI_ISL_3375304, EPI_ISL_3375305, EPI_ISL_3375306, EPI_ISL_3375307, EPI_ISL_3375308, EPI_ISL_3375309, EPI_ISL_3375310, EPI_ISL_3375311, EPI_ISL_3375312, EPI_ISL_3375313, EPI_ISL_3375314, EPI_ISL_3375315, EPI_ISL_3375316, EPI_ISL_3375317, EPI_ISL_3375318, EPI_ISL_3375319, EPI_ISL_3375320, EPI_ISL_3375321, EPI_ISL_3375322, EPI_ISL_3375323, EPI_ISL_3375324, EPI_ISL_3375325, EPI_ISL_3375326                                                                                                                                                                                                                                                                                                                                                                                                                                                                                                                                                                                                                                                                                                                                                                                                                                                                                                                                                                                                                                                                                                                                                                                                                                                                                                                                                                                                                                                                                                                                                                                                                                                                                                                                                                                                                                                                                                                                                                                                                                                                                                                                                                                                                                                                                                                                                                                                                                                                                                                                                                                                                                                                                                                                                                                                                                                                                                                                                                                                                                                                                                                                                                                                                                                                                                                                                                                                                                                                                                                                                                                                                                                                                                                                                                                                                                                                                                                                                                                                                                                                                                                                                                                                                                                                                                                                                                                                                                                                                                                                                                                                                                                                                                                                                                                                                                                                                                                                                                                                                                                                                                                                                                                                                                                                                                                                                                                                                                                                                                                                                                                                                                                                                                                                                                                                                                                                                                                                                                                                                                                                                                                                                                                                                                                                                                                                                                                                                                                                                                                                                                                                                                                                                                                                                                                                                                                                                                                                                                                                                                                                                                                                                                                                                                                                                                                                                                                                                                                                                                                                                                                                                                                                                                                                                                                                                                                                                                                                                                                                                                                                                                                                                                                                                                                                                                                                                                                                                                                                                                                                                                                                                                                                                                                                                                                                                                                                                                                                                                                                                                                                                                                                                                                                                                                                                                                                                                                                                                                                                                                                                                                                                                                                                                                                                                                                                                                                                                                                                                                                                                                                                                                                                                                                                                                                                                                                                                                                                                                                                                                                                                                                                                                                                                                                                                                                                                                                                                                                                                                                                                                                                                                                                                                                                                                                                                                                                                                                                                                                                                                                                                                                                                                                                                                                                                                                                 | see above                                       | Dinkes Provinsi Sulawesi Tengah<br>National Institute of Health Research and Development                                                                                                                        | Arie Ardiansyah Nugraha; Fajar Nur Sulistiyohadi; Hana Aparsi Pawestri; Hartanti Dian Ikawati; Kartika Dewi Puspa; Krisna Pangesti; Nelly Puspandari; Subangkit; Triyani Soekarso; Vivi Setiawaty                                                                                                                                                                                                                                           |
| EPI_ISL_4090584                                                                                                                                                                                                                                                                                                                                                                                                                                                                                                                                                                                                                                                                                                                                                                                                                                                                                                                                                                                                                                                                                                                                                                                                                                                                                                                                                                                                                                                                                                                                                                                                                                                                                                                                                                                                                                                                                                                                                                                                                                                                                                                                                                                                                                                                                                                                                                                                                                                                                                                                                                                                                                                                                                                                                                                                                                                                                                                                                                                                                                                                                                                                                                                                                                                                                                                                                                                                                                                                                                                                                                                                                                                                                                                                                                                                                                                                                                                                                                                                                                                                                                                                                                                                                                                                                                                                                                                                                                                                                                                                                                                                                                                                                                                                                                                                                                                                                                                                                                                                                                                                                                                                                                                                                                                                                                                                                                                                                                                                                                                                                                                                                                                                                                                                                                                                                                                                                                                                                                                                                                                                                                                                                                                                                                                                                                                                                                                                                                                                                                                                                                                                                                                                                                                                                                                                                                                                                                                                                                                                                                                                                                                                                                                                                                                                                                                                                                                                                                                                                                                                                                                                                                                                                                                                                                                                                                                                                                                                                                                                                                                                                                                                                                                                                                                                                                                                                                                                                                                                                                                                                                                                                                                                                                                                                                                                                                                                                                                                                                                                                                                                                                                                                                                                                                                                                                                                                                                                                                                                                                                                                                                                                                                                                                                                                                                                                                                                                                                                                                                                                                                                                                                                                                                                                                                                                                                                                                                                                                                                                                                                                                                                                                                                                                                                                                                                                                                                                                                                                                                                                                                                                                                                                                                                                                                                                                                                                                                                                                                                                                                                                                                                                                                                                                                                                                                                                                                                                                                                                                                                                                                                                                                                                                                                                                                                                                                              | Dinkes Provinsi Sulawesi Tengah RSUD Mokopido   | National Institute of Health Research and Development                                                                                                                                                           | Arie Ardiansyah Nugraha; Fajar Nur Sulistiyohadi; Hana Aparsi Pawestri; Hartanti Dian Ikawati; Kartika Dewi Puspa; Krisna Pangesti; Nelly Puspandari; Subangkit; Triyani Soekarso; Vivi Setiawaty                                                                                                                                                                                                                                           |
| EPI_ISL_467374                                                                                                                                                                                                                                                                                                                                                                                                                                                                                                                                                                                                                                                                                                                                                                                                                                                                                                                                                                                                                                                                                                                                                                                                                                                                                                                                                                                                                                                                                                                                                                                                                                                                                                                                                                                                                                                                                                                                                                                                                                                                                                                                                                                                                                                                                                                                                                                                                                                                                                                                                                                                                                                                                                                                                                                                                                                                                                                                                                                                                                                                                                                                                                                                                                                                                                                                                                                                                                                                                                                                                                                                                                                                                                                                                                                                                                                                                                                                                                                                                                                                                                                                                                                                                                                                                                                                                                                                                                                                                                                                                                                                                                                                                                                                                                                                                                                                                                                                                                                                                                                                                                                                                                                                                                                                                                                                                                                                                                                                                                                                                                                                                                                                                                                                                                                                                                                                                                                                                                                                                                                                                                                                                                                                                                                                                                                                                                                                                                                                                                                                                                                                                                                                                                                                                                                                                                                                                                                                                                                                                                                                                                                                                                                                                                                                                                                                                                                                                                                                                                                                                                                                                                                                                                                                                                                                                                                                                                                                                                                                                                                                                                                                                                                                                                                                                                                                                                                                                                                                                                                                                                                                                                                                                                                                                                                                                                                                                                                                                                                                                                                                                                                                                                                                                                                                                                                                                                                                                                                                                                                                                                                                                                                                                                                                                                                                                                                                                                                                                                                                                                                                                                                                                                                                                                                                                                                                                                                                                                                                                                                                                                                                                                                                                                                                                                                                                                                                                                                                                                                                                                                                                                                                                                                                                                                                                                                                                                                                                                                                                                                                                                                                                                                                                                                                                                                                                                                                                                                                                                                                                                                                                                                                                                                                                                                                                                                               | Dinkes Samarinda                                | Eijkman Institute for Molecular Biology, Ministry of Research and Technology/National Agency for Research and Innovation                                                                                        | Amin Soebandrio; David H Muljono; Edison Johar; Frilasita A Yudhaputri; Hidayat Trimarsanto; Khin Saw Myint; Safarina G Malik                                                                                                                                                                                                                                                                                                               |
| EPI_ISL_2233090                                                                                                                                                                                                                                                                                                                                                                                                                                                                                                                                                                                                                                                                                                                                                                                                                                                                                                                                                                                                                                                                                                                                                                                                                                                                                                                                                                                                                                                                                                                                                                                                                                                                                                                                                                                                                                                                                                                                                                                                                                                                                                                                                                                                                                                                                                                                                                                                                                                                                                                                                                                                                                                                                                                                                                                                                                                                                                                                                                                                                                                                                                                                                                                                                                                                                                                                                                                                                                                                                                                                                                                                                                                                                                                                                                                                                                                                                                                                                                                                                                                                                                                                                                                                                                                                                                                                                                                                                                                                                                                                                                                                                                                                                                                                                                                                                                                                                                                                                                                                                                                                                                                                                                                                                                                                                                                                                                                                                                                                                                                                                                                                                                                                                                                                                                                                                                                                                                                                                                                                                                                                                                                                                                                                                                                                                                                                                                                                                                                                                                                                                                                                                                                                                                                                                                                                                                                                                                                                                                                                                                                                                                                                                                                                                                                                                                                                                                                                                                                                                                                                                                                                                                                                                                                                                                                                                                                                                                                                                                                                                                                                                                                                                                                                                                                                                                                                                                                                                                                                                                                                                                                                                                                                                                                                                                                                                                                                                                                                                                                                                                                                                                                                                                                                                                                                                                                                                                                                                                                                                                                                                                                                                                                                                                                                                                                                                                                                                                                                                                                                                                                                                                                                                                                                                                                                                                                                                                                                                                                                                                                                                                                                                                                                                                                                                                                                                                                                                                                                                                                                                                                                                                                                                                                                                                                                                                                                                                                                                                                                                                                                                                                                                                                                                                                                                                                                                                                                                                                                                                                                                                                                                                                                                                                                                                                                                                                              | Dinkes Samarinda                                | National Institute of Health Research and Development                                                                                                                                                           | Arie Ardiansyah Nugraha; Hana Aparsi Pawestri; Hartanti Dian Ikawati; Kartika Dewi Puspa; Krisna Pangesti; Nelly Puspandari; Subangkit; Triyani Soekarso; Vivi Setiawaty                                                                                                                                                                                                                                                                    |
| EPI_ISL_754241                                                                                                                                                                                                                                                                                                                                                                                                                                                                                                                                                                                                                                                                                                                                                                                                                                                                                                                                                                                                                                                                                                                                                                                                                                                                                                                                                                                                                                                                                                                                                                                                                                                                                                                                                                                                                                                                                                                                                                                                                                                                                                                                                                                                                                                                                                                                                                                                                                                                                                                                                                                                                                                                                                                                                                                                                                                                                                                                                                                                                                                                                                                                                                                                                                                                                                                                                                                                                                                                                                                                                                                                                                                                                                                                                                                                                                                                                                                                                                                                                                                                                                                                                                                                                                                                                                                                                                                                                                                                                                                                                                                                                                                                                                                                                                                                                                                                                                                                                                                                                                                                                                                                                                                                                                                                                                                                                                                                                                                                                                                                                                                                                                                                                                                                                                                                                                                                                                                                                                                                                                                                                                                                                                                                                                                                                                                                                                                                                                                                                                                                                                                                                                                                                                                                                                                                                                                                                                                                                                                                                                                                                                                                                                                                                                                                                                                                                                                                                                                                                                                                                                                                                                                                                                                                                                                                                                                                                                                                                                                                                                                                                                                                                                                                                                                                                                                                                                                                                                                                                                                                                                                                                                                                                                                                                                                                                                                                                                                                                                                                                                                                                                                                                                                                                                                                                                                                                                                                                                                                                                                                                                                                                                                                                                                                                                                                                                                                                                                                                                                                                                                                                                                                                                                                                                                                                                                                                                                                                                                                                                                                                                                                                                                                                                                                                                                                                                                                                                                                                                                                                                                                                                                                                                                                                                                                                                                                                                                                                                                                                                                                                                                                                                                                                                                                                                                                                                                                                                                                                                                                                                                                                                                                                                                                                                                                                                                               | Dinkes Tasikmalaya                              | "School of Life Sciences and Technology & School of Pharmacy-Institut Teknologi Bandung; Molecular Genetics Laboratory-Faculty of Medicine-Universitas Padjadjaran; Laboratorium Kesehatan Provinsi Jawa Barat" | Agung Eru Wibowo; Azzania Fibriani; Catur Riani; Cut Nur Cinthia Alamanda; Ema Rahmawati; Hammam Riza; Hesti Lina Wiraswati; Husna Nugrahapraja; Irvan Faizal; Karimatu Khoirunnisa; Lia Faridah; Marselina Irasonia Tan; Miftahul Faridl; Rifky Waluyajati Rachman; Ryan Bayusantika Ristandi; Savira Ekawardhani; Soni Solistia Wirawan; Tarwadi; Yunia Sribudiani                                                                        |
| EPI_ISL_1020197, EPI_ISL_1117591, EPI_ISL_2840871, EPI_ISL_2840872, EPI_ISL_2840873, EPI_ISL_2840874, EPI_ISL_2840875, EPI_ISL_2840876, EPI_ISL_2840877, EPI_ISL_2840879, EPI_ISL_2840880, EPI_ISL_2840886, EPI_ISL_2840887, EPI_ISL_2840888, EPI_ISL_2840890, EPI_ISL_2840891, EPI_ISL_2840892                                                                                                                                                                                                                                                                                                                                                                                                                                                                                                                                                                                                                                                                                                                                                                                                                                                                                                                                                                                                                                                                                                                                                                                                                                                                                                                                                                                                                                                                                                                                                                                                                                                                                                                                                                                                                                                                                                                                                                                                                                                                                                                                                                                                                                                                                                                                                                                                                                                                                                                                                                                                                                                                                                                                                                                                                                                                                                                                                                                                                                                                                                                                                                                                                                                                                                                                                                                                                                                                                                                                                                                                                                                                                                                                                                                                                                                                                                                                                                                                                                                                                                                                                                                                                                                                                                                                                                                                                                                                                                                                                                                                                                                                                                                                                                                                                                                                                                                                                                                                                                                                                                                                                                                                                                                                                                                                                                                                                                                                                                                                                                                                                                                                                                                                                                                                                                                                                                                                                                                                                                                                                                                                                                                                                                                                                                                                                                                                                                                                                                                                                                                                                                                                                                                                                                                                                                                                                                                                                                                                                                                                                                                                                                                                                                                                                                                                                                                                                                                                                                                                                                                                                                                                                                                                                                                                                                                                                                                                                                                                                                                                                                                                                                                                                                                                                                                                                                                                                                                                                                                                                                                                                                                                                                                                                                                                                                                                                                                                                                                                                                                                                                                                                                                                                                                                                                                                                                                                                                                                                                                                                                                                                                                                                                                                                                                                                                                                                                                                                                                                                                                                                                                                                                                                                                                                                                                                                                                                                                                                                                                                                                                                                                                                                                                                                                                                                                                                                                                                                                                                                                                                                                                                                                                                                                                                                                                                                                                                                                                                                                                                                                                                                                                                                                                                                                                                                                                                                                                                                                                                                                              | see above                                       | Dinkes, Bogor, West Java<br>Biosafety Level-3 Laboratory, Indonesian Institute of Sciences (LIPI)                                                                                                               | Ade Andriani; Andri Wardiana; Anggia Prasetyoputri; Anik Budhi Dharmayanthi; Asep M. Ridwanulloh; Asep M. Ridwanulloh; Eko Wahyu Putro; Erwin F. Hasrianda; Fahrurrozi; Gita Syahputra; Hariyaton; Herjuno A. Nugroho; Inswasti Cahyani; Listiana Oktavia; Matthew W. Loose; Mohammad Ilyas; Nova D. Yanthi; Puspita Lisdianti; Rathi A. Ningrum; Sugiyono Saputra; Susanti; Syam B. Iryanto; Syam Budi Iryanto; Wien Kusharyoto; Yuliawati |
| EPI_ISL_1041030, EPI_ISL_2991995                                                                                                                                                                                                                                                                                                                                                                                                                                                                                                                                                                                                                                                                                                                                                                                                                                                                                                                                                                                                                                                                                                                                                                                                                                                                                                                                                                                                                                                                                                                                                                                                                                                                                                                                                                                                                                                                                                                                                                                                                                                                                                                                                                                                                                                                                                                                                                                                                                                                                                                                                                                                                                                                                                                                                                                                                                                                                                                                                                                                                                                                                                                                                                                                                                                                                                                                                                                                                                                                                                                                                                                                                                                                                                                                                                                                                                                                                                                                                                                                                                                                                                                                                                                                                                                                                                                                                                                                                                                                                                                                                                                                                                                                                                                                                                                                                                                                                                                                                                                                                                                                                                                                                                                                                                                                                                                                                                                                                                                                                                                                                                                                                                                                                                                                                                                                                                                                                                                                                                                                                                                                                                                                                                                                                                                                                                                                                                                                                                                                                                                                                                                                                                                                                                                                                                                                                                                                                                                                                                                                                                                                                                                                                                                                                                                                                                                                                                                                                                                                                                                                                                                                                                                                                                                                                                                                                                                                                                                                                                                                                                                                                                                                                                                                                                                                                                                                                                                                                                                                                                                                                                                                                                                                                                                                                                                                                                                                                                                                                                                                                                                                                                                                                                                                                                                                                                                                                                                                                                                                                                                                                                                                                                                                                                                                                                                                                                                                                                                                                                                                                                                                                                                                                                                                                                                                                                                                                                                                                                                                                                                                                                                                                                                                                                                                                                                                                                                                                                                                                                                                                                                                                                                                                                                                                                                                                                                                                                                                                                                                                                                                                                                                                                                                                                                                                                                                                                                                                                                                                                                                                                                                                                                                                                                                                                                                                                             | Dr. Cipto Mangunkusumo (RSCM) Hospital          | Faculty of Medicine, Universitas Indonesia                                                                                                                                                                      | Aliya Fatimah; Ari Fahrial Syam; Mei Riasanti; Rani Dwi Ningtias; Rina La Distia Nora                                                                                                                                                                                                                                                                                                                                                       |
| EPI_ISL_528752                                                                                                                                                                                                                                                                                                                                                                                                                                                                                                                                                                                                                                                                                                                                                                                                                                                                                                                                                                                                                                                                                                                                                                                                                                                                                                                                                                                                                                                                                                                                                                                                                                                                                                                                                                                                                                                                                                                                                                                                                                                                                                                                                                                                                                                                                                                                                                                                                                                                                                                                                                                                                                                                                                                                                                                                                                                                                                                                                                                                                                                                                                                                                                                                                                                                                                                                                                                                                                                                                                                                                                                                                                                                                                                                                                                                                                                                                                                                                                                                                                                                                                                                                                                                                                                                                                                                                                                                                                                                                                                                                                                                                                                                                                                                                                                                                                                                                                                                                                                                                                                                                                                                                                                                                                                                                                                                                                                                                                                                                                                                                                                                                                                                                                                                                                                                                                                                                                                                                                                                                                                                                                                                                                                                                                                                                                                                                                                                                                                                                                                                                                                                                                                                                                                                                                                                                                                                                                                                                                                                                                                                                                                                                                                                                                                                                                                                                                                                                                                                                                                                                                                                                                                                                                                                                                                                                                                                                                                                                                                                                                                                                                                                                                                                                                                                                                                                                                                                                                                                                                                                                                                                                                                                                                                                                                                                                                                                                                                                                                                                                                                                                                                                                                                                                                                                                                                                                                                                                                                                                                                                                                                                                                                                                                                                                                                                                                                                                                                                                                                                                                                                                                                                                                                                                                                                                                                                                                                                                                                                                                                                                                                                                                                                                                                                                                                                                                                                                                                                                                                                                                                                                                                                                                                                                                                                                                                                                                                                                                                                                                                                                                                                                                                                                                                                                                                                                                                                                                                                                                                                                                                                                                                                                                                                                                                                                                                               | Dr. H. A. Rotinsulu Lung Hospital               | School of Pharmacy & School of Life Sciences and Technology - Institut Teknologi Bandung; Molecular Genetics Laboratory-Faculty of Medicine-Universitas Padjadjaran; Laboratorium Kesehatan Provinsi Jawa Barat | Adelina Khristiani Rahayu; Agung Eru Wibowo; Azzania Fibriani; Catur Riani; Cut Nur Cinthia Alamanda; Ema Rahmawati; Gusti Ayu Prani Pradani; Hammam Riza; Hesti Lina Wiraswati; Husna Nugrahapraja; Irvan Faizal; Lia Faridah; Marselina Irasonia Tan; Rifky Waluyajati Rachman; Ryan Bayusantika Ristandi; Savira Ekawardhani; Sony Solistia Wirawan; Tarwadi; Yunia Sribudiani                                                           |
| EPI_ISL_4885279, EPI_ISL_4885280, EPI_ISL_4885281, EPI_ISL_4885282, EPI_ISL_4885283, EPI_ISL_4885284                                                                                                                                                                                                                                                                                                                                                                                                                                                                                                                                                                                                                                                                                                                                                                                                                                                                                                                                                                                                                                                                                                                                                                                                                                                                                                                                                                                                                                                                                                                                                                                                                                                                                                                                                                                                                                                                                                                                                                                                                                                                                                                                                                                                                                                                                                                                                                                                                                                                                                                                                                                                                                                                                                                                                                                                                                                                                                                                                                                                                                                                                                                                                                                                                                                                                                                                                                                                                                                                                                                                                                                                                                                                                                                                                                                                                                                                                                                                                                                                                                                                                                                                                                                                                                                                                                                                                                                                                                                                                                                                                                                                                                                                                                                                                                                                                                                                                                                                                                                                                                                                                                                                                                                                                                                                                                                                                                                                                                                                                                                                                                                                                                                                                                                                                                                                                                                                                                                                                                                                                                                                                                                                                                                                                                                                                                                                                                                                                                                                                                                                                                                                                                                                                                                                                                                                                                                                                                                                                                                                                                                                                                                                                                                                                                                                                                                                                                                                                                                                                                                                                                                                                                                                                                                                                                                                                                                                                                                                                                                                                                                                                                                                                                                                                                                                                                                                                                                                                                                                                                                                                                                                                                                                                                                                                                                                                                                                                                                                                                                                                                                                                                                                                                                                                                                                                                                                                                                                                                                                                                                                                                                                                                                                                                                                                                                                                                                                                                                                                                                                                                                                                                                                                                                                                                                                                                                                                                                                                                                                                                                                                                                                                                                                                                                                                                                                                                                                                                                                                                                                                                                                                                                                                                                                                                                                                                                                                                                                                                                                                                                                                                                                                                                                                                                                                                                                                                                                                                                                                                                                                                                                                                                                                                                                                                         | Dr. Slamet Garut Public Hospital                | West Java Health Laboratory                                                                                                                                                                                     | Azzania Fibriani; Cut Nur Cinthia Alamanda; Ema Rahmawati; Isak Solihin; Karimatu Khoirunnisa; Miftahul Faridl; Rifky Waluyajati Rachman; Rini Robiani; Ryan Bayusantika Ristandi                                                                                                                                                                                                                                                           |
| EPI_ISL_4885266, EPI_ISL_4885267, EPI_ISL_4885268, EPI_ISL_4885269, EPI_ISL_4885270, EPI_ISL_4885271, EPI_ISL_4885272, EPI_ISL_4885273, EPI_ISL_4885274, EPI_ISL_4885275, EPI_ISL_4885276, EPI_ISL_4885277, EPI_ISL_4885278                                                                                                                                                                                                                                                                                                                                                                                                                                                                                                                                                                                                                                                                                                                                                                                                                                                                                                                                                                                                                                                                                                                                                                                                                                                                                                                                                                                                                                                                                                                                                                                                                                                                                                                                                                                                                                                                                                                                                                                                                                                                                                                                                                                                                                                                                                                                                                                                                                                                                                                                                                                                                                                                                                                                                                                                                                                                                                                                                                                                                                                                                                                                                                                                                                                                                                                                                                                                                                                                                                                                                                                                                                                                                                                                                                                                                                                                                                                                                                                                                                                                                                                                                                                                                                                                                                                                                                                                                                                                                                                                                                                                                                                                                                                                                                                                                                                                                                                                                                                                                                                                                                                                                                                                                                                                                                                                                                                                                                                                                                                                                                                                                                                                                                                                                                                                                                                                                                                                                                                                                                                                                                                                                                                                                                                                                                                                                                                                                                                                                                                                                                                                                                                                                                                                                                                                                                                                                                                                                                                                                                                                                                                                                                                                                                                                                                                                                                                                                                                                                                                                                                                                                                                                                                                                                                                                                                                                                                                                                                                                                                                                                                                                                                                                                                                                                                                                                                                                                                                                                                                                                                                                                                                                                                                                                                                                                                                                                                                                                                                                                                                                                                                                                                                                                                                                                                                                                                                                                                                                                                                                                                                                                                                                                                                                                                                                                                                                                                                                                                                                                                                                                                                                                                                                                                                                                                                                                                                                                                                                                                                                                                                                                                                                                                                                                                                                                                                                                                                                                                                                                                                                                                                                                                                                                                                                                                                                                                                                                                                                                                                                                                                                                                                                                                                                                                                                                                                                                                                                                                                                                                                                                                                  | see above                                       | Dr. Slamet Garut Public Hospital<br>West Java Health Laboratory; School of Life Sciences and Technology, Institut Teknologi Bandung                                                                             | Azzania Fibriani; Cut Nur Cinthia Alamanda; Ema Rahmawati; Isak Solihin; Karimatu Khoirunnisa; Miftahul Faridl; Rifky Waluyajati Rachman; Rini Robiani; Ryan Bayusantika Ristandi                                                                                                                                                                                                                                                           |
| EPI_ISL_5328538                                                                                                                                                                                                                                                                                                                                                                                                                                                                                                                                                                                                                                                                                                                                                                                                                                                                                                                                                                                                                                                                                                                                                                                                                                                                                                                                                                                                                                                                                                                                                                                                                                                                                                                                                                                                                                                                                                                                                                                                                                                                                                                                                                                                                                                                                                                                                                                                                                                                                                                                                                                                                                                                                                                                                                                                                                                                                                                                                                                                                                                                                                                                                                                                                                                                                                                                                                                                                                                                                                                                                                                                                                                                                                                                                                                                                                                                                                                                                                                                                                                                                                                                                                                                                                                                                                                                                                                                                                                                                                                                                                                                                                                                                                                                                                                                                                                                                                                                                                                                                                                                                                                                                                                                                                                                                                                                                                                                                                                                                                                                                                                                                                                                                                                                                                                                                                                                                                                                                                                                                                                                                                                                                                                                                                                                                                                                                                                                                                                                                                                                                                                                                                                                                                                                                                                                                                                                                                                                                                                                                                                                                                                                                                                                                                                                                                                                                                                                                                                                                                                                                                                                                                                                                                                                                                                                                                                                                                                                                                                                                                                                                                                                                                                                                                                                                                                                                                                                                                                                                                                                                                                                                                                                                                                                                                                                                                                                                                                                                                                                                                                                                                                                                                                                                                                                                                                                                                                                                                                                                                                                                                                                                                                                                                                                                                                                                                                                                                                                                                                                                                                                                                                                                                                                                                                                                                                                                                                                                                                                                                                                                                                                                                                                                                                                                                                                                                                                                                                                                                                                                                                                                                                                                                                                                                                                                                                                                                                                                                                                                                                                                                                                                                                                                                                                                                                                                                                                                                                                                                                                                                                                                                                                                                                                                                                                                                                              | Dr. Slamet Garut Public Regional Hospital       | West Java Health Laboratory; School of Life Sciences and Technology, Institut Teknologi Bandung                                                                                                                 | Azzania Fibriani; Cut Nur Cinthia Alamanda; Ema Rahmawati; Karimatu Khoirunnisa; Miftahul Faridl; Rifky Waluyajati Rachman; Rini Robiani; Ryan Bayusantika Ristandi                                                                                                                                                                                                                                                                         |
| EPI_ISL_1364466, EPI_ISL_1364467, EPI_ISL_1364468, EPI_ISL_1366083, EPI_ISL_1366238, EPI_ISL_1366269, EPI_ISL_1366271                                                                                                                                                                                                                                                                                                                                                                                                                                                                                                                                                                                                                                                                                                                                                                                                                                                                                                                                                                                                                                                                                                                                                                                                                                                                                                                                                                                                                                                                                                                                                                                                                                                                                                                                                                                                                                                                                                                                                                                                                                                                                                                                                                                                                                                                                                                                                                                                                                                                                                                                                                                                                                                                                                                                                                                                                                                                                                                                                                                                                                                                                                                                                                                                                                                                                                                                                                                                                                                                                                                                                                                                                                                                                                                                                                                                                                                                                                                                                                                                                                                                                                                                                                                                                                                                                                                                                                                                                                                                                                                                                                                                                                                                                                                                                                                                                                                                                                                                                                                                                                                                                                                                                                                                                                                                                                                                                                                                                                                                                                                                                                                                                                                                                                                                                                                                                                                                                                                                                                                                                                                                                                                                                                                                                                                                                                                                                                                                                                                                                                                                                                                                                                                                                                                                                                                                                                                                                                                                                                                                                                                                                                                                                                                                                                                                                                                                                                                                                                                                                                                                                                                                                                                                                                                                                                                                                                                                                                                                                                                                                                                                                                                                                                                                                                                                                                                                                                                                                                                                                                                                                                                                                                                                                                                                                                                                                                                                                                                                                                                                                                                                                                                                                                                                                                                                                                                                                                                                                                                                                                                                                                                                                                                                                                                                                                                                                                                                                                                                                                                                                                                                                                                                                                                                                                                                                                                                                                                                                                                                                                                                                                                                                                                                                                                                                                                                                                                                                                                                                                                                                                                                                                                                                                                                                                                                                                                                                                                                                                                                                                                                                                                                                                                                                                                                                                                                                                                                                                                                                                                                                                                                                                                                                                                                                        | see above                                       | Dr. Soetomo Teaching Hospital<br>Research Center for Vaccine Technology and Development, Institute of Tropical Disease, Airlangga University                                                                    | Andi Yasmin Wijaya; Aryati; Cita Rosita Sigit Prakoeswa; Damayanti Tinduh; Dominicus Husada; Dwiyaniti Puspitasari; Fedik Abdul Rantam; Helen Susilowati; Jusak Nugraha; Neneng Dewi Kurniati; Ni Nyoman Tri Puspangingsih                                                                                                                                                                                                                  |
| EPI_ISL_4417852, EPI_ISL_4417853, EPI_ISL_4417854, EPI_ISL_4417855, EPI_ISL_4417856, EPI_ISL_4417857, EPI_ISL_4417858, EPI_ISL_4417861, EPI_ISL_4417862, EPI_ISL_4417864, EPI_ISL_4417865, EPI_ISL_4417866, EPI_ISL_4417867, EPI_ISL_4417868, EPI_ISL_4417869, EPI_ISL_4417870, EPI_ISL_4417871, EPI_ISL_4417872, EPI_ISL_4417873, EPI_ISL_4417874, EPI_ISL_4417875, EPI_ISL_4417876, EPI_ISL_4417885, EPI_ISL_4417886, EPI_ISL_4417887, EPI_ISL_4417888, EPI_ISL_4417889, EPI_ISL_4417890, EPI_ISL_4417891, EPI_ISL_4417892, EPI_ISL_4417893                                                                                                                                                                                                                                                                                                                                                                                                                                                                                                                                                                                                                                                                                                                                                                                                                                                                                                                                                                                                                                                                                                                                                                                                                                                                                                                                                                                                                                                                                                                                                                                                                                                                                                                                                                                                                                                                                                                                                                                                                                                                                                                                                                                                                                                                                                                                                                                                                                                                                                                                                                                                                                                                                                                                                                                                                                                                                                                                                                                                                                                                                                                                                                                                                                                                                                                                                                                                                                                                                                                                                                                                                                                                                                                                                                                                                                                                                                                                                                                                                                                                                                                                                                                                                                                                                                                                                                                                                                                                                                                                                                                                                                                                                                                                                                                                                                                                                                                                                                                                                                                                                                                                                                                                                                                                                                                                                                                                                                                                                                                                                                                                                                                                                                                                                                                                                                                                                                                                                                                                                                                                                                                                                                                                                                                                                                                                                                                                                                                                                                                                                                                                                                                                                                                                                                                                                                                                                                                                                                                                                                                                                                                                                                                                                                                                                                                                                                                                                                                                                                                                                                                                                                                                                                                                                                                                                                                                                                                                                                                                                                                                                                                                                                                                                                                                                                                                                                                                                                                                                                                                                                                                                                                                                                                                                                                                                                                                                                                                                                                                                                                                                                                                                                                                                                                                                                                                                                                                                                                                                                                                                                                                                                                                                                                                                                                                                                                                                                                                                                                                                                                                                                                                                                                                                                                                                                                                                                                                                                                                                                                                                                                                                                                                                                                                                                                                                                                                                                                                                                                                                                                                                                                                                                                                                                                                                                                                                                                                                                                                                                                                                                                                                                                                                                                                                                                                | see above                                       | EIJKMAN OXFORD CLINICAL RESEARCH UNIT / RS Fatmawati<br>Genomik Solidaritas Indonesia Laboratorium                                                                                                              | Anis Karuniawati; Annisa Muthiah Sukirman; Anuraj Shankar; Ariel Pradipta; Carissa Sintca Wijaya; Decy Subekti; Dhahlia Agustina Cahyono; Dian Tri Wahyudi; Gracia Felias Enos Korompis; Himawan Masyhuri; Louisa Markus; Meutia Ayuputeri Kumaheri; Raph Hamers; Stefanus Bernard; Suwarti; Vera Irawany                                                                                                                                   |
| EPI_ISL_4417877, EPI_ISL_4417878, EPI_ISL_4417879, EPI_ISL_4417880, EPI_ISL_4417881, EPI_ISL_4417882, EPI_ISL_4417883, EPI_ISL_4417884, EPI_ISL_4417915, EPI_ISL_4417916, EPI_ISL_4468051, EPI_ISL_4468052, EPI_ISL_4468053, EPI_ISL_4468054, EPI_ISL_4468055, EPI_ISL_4468056, EPI_ISL_4468057, EPI_ISL_4468058, EPI_ISL_4468059, EPI_ISL_4468060, EPI_ISL_4468061, EPI_ISL_4468062, EPI_ISL_4468063, EPI_ISL_4468064, EPI_ISL_4468065, EPI_ISL_4468066, EPI_ISL_4468067, EPI_ISL_4468068, EPI_ISL_4468069, EPI_ISL_4468070, EPI_ISL_4468071, EPI_ISL_4468072, EPI_ISL_4468073, EPI_ISL_4468074, EPI_ISL_4468075, EPI_ISL_4468076, EPI_ISL_4468077, EPI_ISL_4468078, EPI_ISL_4468079, EPI_ISL_4468080, EPI_ISL_4468081, EPI_ISL_4468082, EPI_ISL_4468083, EPI_ISL_4468084, EPI_ISL_4468085, EPI_ISL_4468086, EPI_ISL_4468087, EPI_ISL_4468088, EPI_ISL_4468089, EPI_ISL_4468090, EPI_ISL_4468091, EPI_ISL_4468092, EPI_ISL_4468093, EPI_ISL_4468094, EPI_ISL_4468095, EPI_ISL_4468096, EPI_ISL_4468097, EPI_ISL_4468098, EPI_ISL_4468099, EPI_ISL_4468100, EPI_ISL_4468101, EPI_ISL_4468102, EPI_ISL_4468103, EPI_ISL_4468104, EPI_ISL_4468105, EPI_ISL_4468106, EPI_ISL_4468107, EPI_ISL_4468108, EPI_ISL_4468109, EPI_ISL_4468110, EPI_ISL_4468111, EPI_ISL_4468112, EPI_ISL_4468113, EPI_ISL_4468114, EPI_ISL_4468115, EPI_ISL_4468116, EPI_ISL_4468117, EPI_ISL_4468118, EPI_ISL_4468119, EPI_ISL_4468120, EPI_ISL_4468121, EPI_ISL_4468122, EPI_ISL_4468123, EPI_ISL_4468124, EPI_ISL_4468125, EPI_ISL_4468126, EPI_ISL_4468127, EPI_ISL_4468128, EPI_ISL_4468129, EPI_ISL_4468130, EPI_ISL_4468131, EPI_ISL_4468132, EPI_ISL_4468133, EPI_ISL_4468134, EPI_ISL_4468135, EPI_ISL_4468136, EPI_ISL_4468137, EPI_ISL_4468138, EPI_ISL_4468139, EPI_ISL_4468140, EPI_ISL_4468141, EPI_ISL_4468142, EPI_ISL_4468143, EPI_ISL_4468144, EPI_ISL_4468145, EPI_ISL_4468146, EPI_ISL_4468147, EPI_ISL_4468148, EPI_ISL_4468149, EPI_ISL_4468150, EPI_ISL_4468151, EPI_ISL_4468152, EPI_ISL_4468153, EPI_ISL_4468154, EPI_ISL_4468155, EPI_ISL_4468156, EPI_ISL_4468157, EPI_ISL_4468158, EPI_ISL_4468159, EPI_ISL_4468160, EPI_ISL_4468161, EPI_ISL_4468162, EPI_ISL_4468163, EPI_ISL_4468164, EPI_ISL_4468165, EPI_ISL_4468166, EPI_ISL_4468167, EPI_ISL_4468168, EPI_ISL_4468169, EPI_ISL_4468170, EPI_ISL_4468171, EPI_ISL_4468172, EPI_ISL_4468173, EPI_ISL_4468174, EPI_ISL_4468175, EPI_ISL_4468176, EPI_ISL_4468177, EPI_ISL_4468178, EPI_ISL_4468179, EPI_ISL_4468180, EPI_ISL_4468181, EPI_ISL_4468182, EPI_ISL_4468183, EPI_ISL_4468184, EPI_ISL_4468185, EPI_ISL_4468186, EPI_ISL_4468187, EPI_ISL_4468188, EPI_ISL_4468189, EPI_ISL_4468190, EPI_ISL_4468191, EPI_ISL_4468192, EPI_ISL_4468193, EPI_ISL_4468194, EPI_ISL_4468195, EPI_ISL_4468196, EPI_ISL_4468197, EPI_ISL_4468198, EPI_ISL_4468199, EPI_ISL_4468200, EPI_ISL_4468201, EPI_ISL_4468202, EPI_ISL_4468203, EPI_ISL_4468204, EPI_ISL_4468205, EPI_ISL_4468206, EPI_ISL_4468207, EPI_ISL_4468208, EPI_ISL_4468209, EPI_ISL_4468210, EPI_ISL_4468211, EPI_ISL_4468212, EPI_ISL_4468213, EPI_ISL_4468214, EPI_ISL_4468215, EPI_ISL_4468216, EPI_ISL_4468217, EPI_ISL_4468218, EPI_ISL_4468219, EPI_ISL_4468220, EPI_ISL_4468221, EPI_ISL_4468222, EPI_ISL_4468223, EPI_ISL_4468224, EPI_ISL_4468225, EPI_ISL_4468226, EPI_ISL_4468227, EPI_ISL_4468228, EPI_ISL_4468229, EPI_ISL_4468230, EPI_ISL_4468231, EPI_ISL_4468232, EPI_ISL_4468233, EPI_ISL_4468234, EPI_ISL_4468235, EPI_ISL_4468236, EPI_ISL_4468237, EPI_ISL_4468238, EPI_ISL_4468239, EPI_ISL_4468240, EPI_ISL_4468241, EPI_ISL_4468242, EPI_ISL_4468243, EPI_ISL_4468244, EPI_ISL_4468245, EPI_ISL_4468246, EPI_ISL_4468247, EPI_ISL_4468248, EPI_ISL_4468249, EPI_ISL_4468250, EPI_ISL_4468251, EPI_ISL_4468252, EPI_ISL_4468253, EPI_ISL_4468254, EPI_ISL_4468255, EPI_ISL_4468256, EPI_ISL_4468257, EPI_ISL_4468258, EPI_ISL_4468259, EPI_ISL_4468260, EPI_ISL_4468261, EPI_ISL_4468262, EPI_ISL_4468263, EPI_ISL_4468264, EPI_ISL_4468265, EPI_ISL_4468266, EPI_ISL_4468267, EPI_ISL_4468268, EPI_ISL_4468269, EPI_ISL_4468270, EPI_ISL_4468271, EPI_ISL_4468272, EPI_ISL_4468273, EPI_ISL_4468274, EPI_ISL_4468275, EPI_ISL_4468276, EPI_ISL_4468277, EPI_ISL_4468278, EPI_ISL_4468279, EPI_ISL_4468280, EPI_ISL_4468281, EPI_ISL_4468282, EPI_ISL_4468283, EPI_ISL_4468284, EPI_ISL_4468285, EPI_ISL_4468286, EPI_ISL_4468287, EPI_ISL_4468288, EPI_ISL_4468289, EPI_ISL_4468290, EPI_ISL_4468291, EPI_ISL_4468292, EPI_ISL_4468293, EPI_ISL_4468294, EPI_ISL_4468295, EPI_ISL_4468296, EPI_ISL_4468297, EPI_ISL_4468298, EPI_ISL_4468299, EPI_ISL_4468300, EPI_ISL_4468301, EPI_ISL_4468302, EPI_ISL_4468303, EPI_ISL_4468304, EPI_ISL_4468305, EPI_ISL_4468306, EPI_ISL_4468307, EPI_ISL_4468308, EPI_ISL_4468309, EPI_ISL_4468310, EPI_ISL_4468311, EPI_ISL_4468312, EPI_ISL_4468313, EPI_ISL_4468314, EPI_ISL_4468315, EPI_ISL_4468316, EPI_ISL_4468317, EPI_ISL_4468318, EPI_ISL_4468319, EPI_ISL_4468320, EPI_ISL_4468321, EPI_ISL_4468322, EPI_ISL_4468323, EPI_ISL_4468324, EPI_ISL_4468325, EPI_ISL_4468326, EPI_ISL_4468327, EPI_ISL_4468328, EPI_ISL_4468329, EPI_ISL_4468330, EPI_ISL_4468331, EPI_ISL_4468332, EPI_ISL_4468333, EPI_ISL_4468334, EPI_ISL_4468335, EPI_ISL_4468336, EPI_ISL_4468337, EPI_ISL_4468338, EPI_ISL_4468339, EPI_ISL_4468340, EPI_ISL_4468341, EPI_ISL_4468342, EPI_ISL_4468343, EPI_ISL_4468344, EPI_ISL_4468345, EPI_ISL_4468346, EPI_ISL_4468347, EPI_ISL_4468348, EPI_ISL_4468349, EPI_ISL_4468350, EPI_ISL_4468351, EPI_ISL_4468352, EPI_ISL_4468353, EPI_ISL_4468354, EPI_ISL_4468355, EPI_ISL_4468356, EPI_ISL_4468357, EPI_ISL_4468358, EPI_ISL_4468359, EPI_ISL_4468360, EPI_ISL_4468361, EPI_ISL_4468362, EPI_ISL_4468363, EPI_ISL_4468364, EPI_ISL_4468365, EPI_ISL_4468366, EPI_ISL_4468367, EPI_ISL_4468368, EPI_ISL_4468369, EPI_ISL_4468370, EPI_ISL_4468371, EPI_ISL_4468372, EPI_ISL_4468373, EPI_ISL_4468374, EPI_ISL_4468375, EPI_ISL_4468376, EPI_ISL_4468377, EPI_ISL_4468378, EPI_ISL_4468379, EPI_ISL_4468380, EPI_ISL_4468381, EPI_ISL_4468382, EPI_ISL_4468383, EPI_ISL_4468384, EPI_ISL_4468385, EPI_ISL_4468386, EPI_ISL_4468387, EPI_ISL_4468388, EPI_ISL_4468389, EPI_ISL_4468390, EPI_ISL_4468391, EPI_ISL_4468392, EPI_ISL_4468393, EPI_ISL_4468394, EPI_ISL_4468395, EPI_ISL_4468396, EPI_ISL_4468397, EPI_ISL_4468398, EPI_ISL_4468399, EPI_ISL_4468400, EPI_ISL_4468401, EPI_ISL_4468402, EPI_ISL_4468403, EPI_ISL_4468404, EPI_ISL_4468405, EPI_ISL_4468406, EPI_ISL_4468407, EPI_ISL_4468408, EPI_ISL_4468409, EPI_ISL_4468410, EPI_ISL_4468411, EPI_ISL_4468412, EPI_ISL_4468413, EPI_ISL_4468414, EPI_ISL_4468415, EPI_ISL_4468416, EPI_ISL_4468417, EPI_ISL_4468418, EPI_ISL_4468419, EPI_ISL_4468420, EPI_ISL_4468421, EPI_ISL_4468422, EPI_ISL_4468423, EPI_ISL_4468424, EPI_ISL_4468425, EPI_ISL_4468426, EPI_ISL_4468427, EPI_ISL_4468428, EPI_ISL_4468429, EPI_ISL_4468430, EPI_ISL_4468431, EPI_ISL_4468432, EPI_ISL_4468433, EPI_ISL_4468434, EPI_ISL_4468435, EPI_ISL_4468436, EPI_ISL_4468437, EPI_ISL_4468438, EPI_ISL_4468439, EPI_ISL_4468440, EPI_ISL_4468441, EPI_ISL_4468442, EPI_ISL_4468443, EPI_ISL_4468444, EPI_ISL_4468445, EPI_ISL_4468446, EPI_ISL_4468447, EPI_ISL_4468448, EPI_ISL_4468449, EPI_ISL_4468450, EPI_ISL_4468451, EPI_ISL_4468452, EPI_ISL_4468453, EPI_ISL_4468454, EPI_ISL_4468455, EPI_ISL_4468456, EPI_ISL_4468457, EPI_ISL_4468458, EPI_ISL_4468459, EPI_ISL_4468460, EPI_ISL_4468461, EPI_ISL_4468462, EPI_ISL_4468463, EPI_ISL_4468464, EPI_ISL_4468465, EPI_ISL_4468466, EPI_ISL_4468467, EPI_ISL_4468468, EPI_ISL_4468469, EPI_ISL_4468470, EPI_ISL_4468471, EPI_ISL_4468472, EPI_ISL_4468473, EPI_ISL_4468474, EPI_ISL_4468475, EPI_ISL_4468476, EPI_ISL_4468477, EPI_ISL_4468478, EPI_ISL_4468479, EPI_ISL_4468480, EPI_ISL_4468481, EPI_ISL_4468482, EPI_ISL_4468483, EPI_ISL_4468484, EPI_ISL_4468485, EPI_ISL_4468486, EPI_ISL_4468487, EPI_ISL_4468488, EPI_ISL_4468489, EPI_ISL_4468490, EPI_ISL_4468491, EPI_ISL_4468492, EPI_ISL_4468493, EPI_ISL_4468494, EPI_ISL_4468495, EPI_ISL_4468496, EPI_ISL_4468497, EPI_ISL_4468498, EPI_ISL_4468499, EPI_ISL_4468500, EPI_ISL_4468501, EPI_ISL_4468502, EPI_ISL_4468503, EPI_ISL_4468504, EPI_ISL_4468505, EPI_ISL_4468506, EPI_ISL_4468507, EPI_ISL_4468508, EPI_ISL_4468509, EPI_ISL_4468510, EPI_ISL_4468511, EPI_ISL_4468512, EPI_ISL_4468513, EPI_ISL_4468514, EPI_ISL_4468515, EPI_ISL_4468516, EPI_ISL_4468517, EPI_ISL_4468518, EPI_ISL_4468519, EPI_ISL_4468520, EPI_ISL_4468521, EPI_ISL_4468522, EPI_ISL_4468523, EPI_ISL_4468524, EPI_ISL_4468525, EPI_ISL_4468526, EPI_ISL_4468527, EPI_ISL_4468528, EPI_ISL_4468529, EPI_ISL_4468530, EPI_ISL_4468531, EPI_ISL_4468532, EPI_ISL_4468533, EPI_ISL_4468534, EPI_ISL_4468535, EPI_ISL_4468536, EPI_ISL_4468537, EPI_ISL_4468538, EPI_ISL_4468539, EPI_ISL_4468540, EPI_ISL_4468541, EPI_ISL_4468542, EPI_ISL_4468543, EPI_ISL_4468544, EPI_ISL_4468545, EPI_ISL_4468546, EPI_ISL_4468547, EPI_ISL_4468548, EPI_ISL_4468549, EPI_ISL_4468550, EPI_ISL_4468551, EPI_ISL_4468552, EPI_ISL_4468553, EPI_ISL_4468554, EPI_ISL_4468555, EPI_ISL_4468556, EPI_ISL_4468557, EPI_ISL_4468558, EPI_ISL_4468559, EPI_ISL_4468560, EPI_ISL_4468561, EPI_ISL_4468562, EPI_ISL_4468563, EPI_ISL_4468564, EPI_ISL_4468565, EPI_ISL_4468566, EPI_ISL_4468567, EPI_ISL_4468568, EPI_ISL_4468569, EPI_ISL_4468570, EPI_ISL_4468571, EPI_ISL_4468572, EPI_ISL_4468573, EPI_ISL_4468574, EPI_ISL_4468575, EPI_ISL_4468576, EPI_ISL_4468577, EPI_ISL_4468578, EPI_ISL_4468579, EPI_ISL_4468580, EPI_ISL_4468581, EPI_ISL_4468582, EPI_ISL_4468583, EPI_ISL_4468584, EPI_ISL_4468585, EPI_ISL_4468586, EPI_ISL_4468587, EPI_ISL_4468588, EPI_ISL_4468589, EPI_ISL_4468590, EPI_ISL_4468591, EPI_ISL_4468592, EPI_ISL_4468593, EPI_ISL_4468594, EPI_ISL_4468595, EPI_ISL_4468596, EPI_ISL_4468597, EPI_ISL_4468598, EPI_ISL_4468599, EPI_ISL_4468600, EPI_ISL_4468601, EPI_ISL_4468602, EPI_ISL_4468603, EPI_ISL_4468604, EPI_ISL_4468605, EPI_ISL_4468606, EPI_ISL_4468607, EPI_ISL_4468608, EPI_ISL_4468609, EPI_ISL_4468610, EPI_ISL_4468611, EPI_ISL_4468612, EPI_ISL_4468613, EPI_ISL_4468614, EPI_ISL_4468615, EPI_ISL_4468616, EPI_ISL_4468617, EPI_ISL_4468618, EPI_ISL_4468619, EPI_ISL_4468620, EPI_ISL_4468621, EPI_ISL_4468622, EPI_ISL_4468623, EPI_ISL_4468624, EPI_ISL_4468625, EPI_ISL_4468626, EPI_ISL_4468627, EPI_ISL_4468628, EPI_ISL_4468629, EPI_ISL_4468630, EPI_ISL_4468631, EPI_ISL_4468632, EPI_ISL_4468633, EPI_ISL_4468634, EPI_ISL_4468635, EPI_ISL_4468636, EPI_ISL_4468637, EPI_ISL_4468638, EPI_ISL_4468639, EPI_ISL_4468640, EPI_ISL_4468641, EPI_ISL_4468642, EPI_ISL_4468643, EPI_ISL_4468644, EPI_ISL_4468645, EPI_ISL_4468646, EPI_ISL_4468647, EPI_ISL_4468648, EPI_ISL_4468649, EPI_ISL_4468650, EPI_ISL_4468651, EPI_ISL_4468652, EPI_ISL_4468653, EPI_ISL_4468654, EPI_ISL_4468655, EPI_ISL_4468656, EPI_ISL_4468657, EPI_ISL_4468658, EPI_ISL_4468659, EPI_ISL_4468660, EPI_ISL_4468661, EPI_ISL_4468662, EPI_ISL_4468663, EPI_ISL_4468664, EPI_ISL_4468665, EPI_ISL_4468666, EPI_ISL_4468667, EPI_ISL_4468668, EPI_ISL_4468669, EPI_ISL_4468670, EPI_ISL_4468671, EPI_ISL_4468672, EPI_ISL_4468673, EPI_ISL_4468674, EPI_ISL_4468675, EPI_ISL_4468676, EPI_ISL_4468677, EPI_ISL_4468678, EPI_ISL_4468679, EPI_ISL_4468680, EPI_ISL_4468681, EPI_ISL_4468682, EPI_ISL_4468683, EPI_ISL_4468684, EPI_ISL_4468685, EPI_ISL_4468686, EPI_ISL_4468687, EPI_ISL_4468688, EPI_ISL_4468689, EPI_ISL_4468690, EPI_ISL_4468691, EPI_ISL_4468692, EPI_ISL_4468693, EPI_ISL_4468694, EPI_ISL_4468695, EPI_ISL_4468696, EPI_ISL_4468697, EPI_ISL_4468698, EPI_ISL_4468699, EPI_ISL_4468700, EPI_ISL_4468701, EPI_ISL_4468702, EPI_ISL_4468703, EPI_ISL_4468704, EPI_ISL_4468705, EPI_ISL_4468706, EPI_ISL_4468707, EPI_ISL_4468708, EPI_ISL_4468709, EPI_ISL_4468710, EPI_ISL_4468711, EPI_ISL_4468712, EPI_ISL_4468713, EPI_ISL_4468714, EPI_ISL_4468715, EPI_ISL_4468716, EPI_ISL_4468717, EPI_ISL_4468718, EPI_ISL_4468719, EPI_ISL_4468720, EPI_ISL_4468721, EPI_ISL_4468722, EPI_ISL_4468723, EPI_ISL_4468724, EPI_ISL_4468725, EPI_ISL_4468726, EPI_ISL_4468727, EPI_ISL_4468728, EPI_ISL_4468729, EPI_ISL_4468730, EPI_ISL_4468731, EPI_ISL_4468732, EPI_ISL_4468733, EPI_ISL_4468734, EPI_ISL_4468735, EPI_ISL_4468736, EPI_ISL_4468737, EPI |                                                 |                                                                                                                                                                                                                 |                                                                                                                                                                                                                                                                                                                                                                                                                                             |

|                                                                                                                                                                                                                                                                                                                                                                                                                                                                                                                                                                                                                                                                                                                                                                                                                                                                                                                                                                                                                                                                                                                                                                                                                                                                                                                                                                                                                                                                                                                                                                                                                                                                                                                                                                                                                                                                                                                                                                                                                                                                                                                                                                                                                                                                                                                                                                                                                                                                                                                                                                                                                                                                                                                                                                                                                                                                                                                                                                                                                                                                                                                                                                                                                                                                                                                                                                                                                                                                                                                                                                                                                                                                                                                                                                                                                                                                                                                                                                                                                                                                                                                                                                                                                                                                                                                                                                                                                                                                                                                                                                                                                                                                                                                                                                                                                                                                                                                                                                                                                                             |           |                           |  |                                                       |  |                                                                                                                                                                                                                                                                         |  |
|---------------------------------------------------------------------------------------------------------------------------------------------------------------------------------------------------------------------------------------------------------------------------------------------------------------------------------------------------------------------------------------------------------------------------------------------------------------------------------------------------------------------------------------------------------------------------------------------------------------------------------------------------------------------------------------------------------------------------------------------------------------------------------------------------------------------------------------------------------------------------------------------------------------------------------------------------------------------------------------------------------------------------------------------------------------------------------------------------------------------------------------------------------------------------------------------------------------------------------------------------------------------------------------------------------------------------------------------------------------------------------------------------------------------------------------------------------------------------------------------------------------------------------------------------------------------------------------------------------------------------------------------------------------------------------------------------------------------------------------------------------------------------------------------------------------------------------------------------------------------------------------------------------------------------------------------------------------------------------------------------------------------------------------------------------------------------------------------------------------------------------------------------------------------------------------------------------------------------------------------------------------------------------------------------------------------------------------------------------------------------------------------------------------------------------------------------------------------------------------------------------------------------------------------------------------------------------------------------------------------------------------------------------------------------------------------------------------------------------------------------------------------------------------------------------------------------------------------------------------------------------------------------------------------------------------------------------------------------------------------------------------------------------------------------------------------------------------------------------------------------------------------------------------------------------------------------------------------------------------------------------------------------------------------------------------------------------------------------------------------------------------------------------------------------------------------------------------------------------------------------------------------------------------------------------------------------------------------------------------------------------------------------------------------------------------------------------------------------------------------------------------------------------------------------------------------------------------------------------------------------------------------------------------------------------------------------------------------------------------------------------------------------------------------------------------------------------------------------------------------------------------------------------------------------------------------------------------------------------------------------------------------------------------------------------------------------------------------------------------------------------------------------------------------------------------------------------------------------------------------------------------------------------------------------------------------------------------------------------------------------------------------------------------------------------------------------------------------------------------------------------------------------------------------------------------------------------------------------------------------------------------------------------------------------------------------------------------------------------------------------------------------------------------------|-----------|---------------------------|--|-------------------------------------------------------|--|-------------------------------------------------------------------------------------------------------------------------------------------------------------------------------------------------------------------------------------------------------------------------|--|
| see above                                                                                                                                                                                                                                                                                                                                                                                                                                                                                                                                                                                                                                                                                                                                                                                                                                                                                                                                                                                                                                                                                                                                                                                                                                                                                                                                                                                                                                                                                                                                                                                                                                                                                                                                                                                                                                                                                                                                                                                                                                                                                                                                                                                                                                                                                                                                                                                                                                                                                                                                                                                                                                                                                                                                                                                                                                                                                                                                                                                                                                                                                                                                                                                                                                                                                                                                                                                                                                                                                                                                                                                                                                                                                                                                                                                                                                                                                                                                                                                                                                                                                                                                                                                                                                                                                                                                                                                                                                                                                                                                                                                                                                                                                                                                                                                                                                                                                                                                                                                                                                   |           | GSI LAB                   |  | National Institute of Health Research and Development |  | Arie Ardiansyah Nugraha; Fajar Nur Sulistiyohadi; Hana Apsari Pawestri; Hartanti Dian Ikawati; Kartika Dewi Puspa; Krisna Pangesti; Meutia Kumaheri; Nelly Puspandari; Subangkit; Triyani Soekarso; Vivi Setiawaty                                                      |  |
| EPI_ISL_3548627, EPI_ISL_3548628, EPI_ISL_3548635, EPI_ISL_3548674, EPI_ISL_3548698, EPI_ISL_3548700, EPI_ISL_3548701, EPI_ISL_3548702, EPI_ISL_3695857                                                                                                                                                                                                                                                                                                                                                                                                                                                                                                                                                                                                                                                                                                                                                                                                                                                                                                                                                                                                                                                                                                                                                                                                                                                                                                                                                                                                                                                                                                                                                                                                                                                                                                                                                                                                                                                                                                                                                                                                                                                                                                                                                                                                                                                                                                                                                                                                                                                                                                                                                                                                                                                                                                                                                                                                                                                                                                                                                                                                                                                                                                                                                                                                                                                                                                                                                                                                                                                                                                                                                                                                                                                                                                                                                                                                                                                                                                                                                                                                                                                                                                                                                                                                                                                                                                                                                                                                                                                                                                                                                                                                                                                                                                                                                                                                                                                                                     | see above | GSI MEDICA PLAZA CILANDAK |  | Genomik Solidaritas Indonesia Laboratorium            |  | Annisa Muthiah Sukirman; Anuraj Shankar; Ariel Pradipta; Carissa Sintca Wijaya; Dhalhia Agustina Cahyono; Dwi Oktavia; Gracia Felias Enos Korompis; Louisa Markus; Meutia Ayuputeri Kumaheri; Neng Hilma Hamidah; Ngabila Salama; Tiranti Windha; Vania Gavrilva Wikasa |  |
| EPI_ISL_2296526, EPI_ISL_2434061, EPI_ISL_2434123, EPI_ISL_2434157, EPI_ISL_2434161, EPI_ISL_2434168, EPI_ISL_2434173, EPI_ISL_2434175, EPI_ISL_2434973, EPI_ISL_2434978, EPI_ISL_2434988, EPI_ISL_2434991, EPI_ISL_2437093, EPI_ISL_2499962, EPI_ISL_2499963, EPI_ISL_2499964, EPI_ISL_2499965, EPI_ISL_2500017, EPI_ISL_2500218, EPI_ISL_2500362, EPI_ISL_2500464, EPI_ISL_2500465, EPI_ISL_2500466, EPI_ISL_2500467, EPI_ISL_2500468, EPI_ISL_2500469, EPI_ISL_2500470, EPI_ISL_2500471, EPI_ISL_2500488, EPI_ISL_2500489, EPI_ISL_2500490, EPI_ISL_2500491, EPI_ISL_2500492, EPI_ISL_2500493, EPI_ISL_2500494, EPI_ISL_2537490, EPI_ISL_2543760, EPI_ISL_2547285, EPI_ISL_2558713, EPI_ISL_2558715, EPI_ISL_2558716, EPI_ISL_2558717, EPI_ISL_2558720, EPI_ISL_2558732, EPI_ISL_2558733, EPI_ISL_2558734, EPI_ISL_2558735, EPI_ISL_2620719, EPI_ISL_2620720, EPI_ISL_2620721, EPI_ISL_2620722, EPI_ISL_2620723, EPI_ISL_2620724, EPI_ISL_2620725, EPI_ISL_2620726, EPI_ISL_2620727, EPI_ISL_2620728, EPI_ISL_2620729, EPI_ISL_2620730, EPI_ISL_2620731, EPI_ISL_2620732, EPI_ISL_2620733, EPI_ISL_2620734, EPI_ISL_2620735, EPI_ISL_2620736, EPI_ISL_2620737, EPI_ISL_2620738, EPI_ISL_2620739, EPI_ISL_2620740, EPI_ISL_2620741, EPI_ISL_2620742, EPI_ISL_2620743, EPI_ISL_2620744, EPI_ISL_2620745, EPI_ISL_2620746, EPI_ISL_2620747, EPI_ISL_2620748, EPI_ISL_2620749, EPI_ISL_2620750, EPI_ISL_2620751, EPI_ISL_2620752, EPI_ISL_2620753, EPI_ISL_2620754, EPI_ISL_2620755, EPI_ISL_2620756, EPI_ISL_2620757, EPI_ISL_2620758, EPI_ISL_2620759, EPI_ISL_2620760, EPI_ISL_2620761, EPI_ISL_2620762, EPI_ISL_2620763, EPI_ISL_2620764, EPI_ISL_2620765, EPI_ISL_2620766, EPI_ISL_2620767, EPI_ISL_2620768, EPI_ISL_2620769, EPI_ISL_2620770, EPI_ISL_2620771, EPI_ISL_2620772, EPI_ISL_2620773, EPI_ISL_2620774, EPI_ISL_2620775, EPI_ISL_2620776, EPI_ISL_2620777, EPI_ISL_2620778, EPI_ISL_2620779, EPI_ISL_2620780, EPI_ISL_2620781, EPI_ISL_2620782, EPI_ISL_2620783, EPI_ISL_2620784, EPI_ISL_2620785, EPI_ISL_2620786, EPI_ISL_2620787, EPI_ISL_2620788, EPI_ISL_2620789, EPI_ISL_2620790, EPI_ISL_2620791, EPI_ISL_2620792, EPI_ISL_2620793, EPI_ISL_2620794, EPI_ISL_2620795, EPI_ISL_2620796, EPI_ISL_2620797, EPI_ISL_2620798, EPI_ISL_2620799, EPI_ISL_2620800, EPI_ISL_2620801, EPI_ISL_2620802, EPI_ISL_2620803, EPI_ISL_2620804, EPI_ISL_2620805, EPI_ISL_2620806, EPI_ISL_2620807, EPI_ISL_2620808, EPI_ISL_2620809, EPI_ISL_2620810, EPI_ISL_2620811, EPI_ISL_2620812, EPI_ISL_2620813, EPI_ISL_2620814, EPI_ISL_2620815, EPI_ISL_2620816, EPI_ISL_2620817, EPI_ISL_2620818, EPI_ISL_2620819, EPI_ISL_2620820, EPI_ISL_2620821, EPI_ISL_2620822, EPI_ISL_2620823, EPI_ISL_2620824, EPI_ISL_2620825, EPI_ISL_2620826, EPI_ISL_2620827, EPI_ISL_2620828, EPI_ISL_2620829, EPI_ISL_2620830, EPI_ISL_2620831, EPI_ISL_2620832, EPI_ISL_2620833, EPI_ISL_2620834, EPI_ISL_2620835, EPI_ISL_2620836, EPI_ISL_2620837, EPI_ISL_2620838, EPI_ISL_2620839, EPI_ISL_2620840, EPI_ISL_2620841, EPI_ISL_2620842, EPI_ISL_2620843, EPI_ISL_2620844, EPI_ISL_2620845, EPI_ISL_2620846, EPI_ISL_2620847, EPI_ISL_2620848, EPI_ISL_2620849, EPI_ISL_2620850, EPI_ISL_2620851, EPI_ISL_2620852, EPI_ISL_2620853, EPI_ISL_2620854, EPI_ISL_2620855, EPI_ISL_2620856, EPI_ISL_2620857, EPI_ISL_2620858, EPI_ISL_2620859, EPI_ISL_2620860, EPI_ISL_2620861, EPI_ISL_2620862, EPI_ISL_2620863, EPI_ISL_2620864, EPI_ISL_2620865, EPI_ISL_2620866, EPI_ISL_2620867, EPI_ISL_2620868, EPI_ISL_2620869, EPI_ISL_2620870, EPI_ISL_2620871, EPI_ISL_2620872, EPI_ISL_2620873, EPI_ISL_2620874, EPI_ISL_2620875, EPI_ISL_2620876, EPI_ISL_2620877, EPI_ISL_2620878, EPI_ISL_2620879, EPI_ISL_2620880, EPI_ISL_2620881, EPI_ISL_2620882, EPI_ISL_2620883, EPI_ISL_2620884, EPI_ISL_2620885, EPI_ISL_2620886, EPI_ISL_2620887, EPI_ISL_2620888, EPI_ISL_2620889, EPI_ISL_2620890, EPI_ISL_2620891, EPI_ISL_2620892, EPI_ISL_2620893, EPI_ISL_2620894, EPI_ISL_2620895, EPI_ISL_2620896, EPI_ISL_2620897, EPI_ISL_2620898, EPI_ISL_2620899, EPI_ISL_2620900, EPI_ISL_2620901, EPI_ISL_2620902, EPI_ISL_2620903, EPI_ISL_2620904, EPI_ISL_2620905, EPI_ISL_2620906, EPI_ISL_2620907, EPI_ISL_2620908, EPI_ISL_2620909, EPI_ISL_2620910, EPI_ISL_2620911, EPI_ISL_2620912, EPI_ISL_2620913, EPI_ISL_2620914, EPI_ISL_2620915, EPI_ISL_2620916, EPI_ISL_2620917, EPI_ISL_2620918, EPI_ISL_2620919, EPI_ISL_2620920, EPI_ISL_2620921, EPI_ISL_2620922, EPI_ISL_2620923, EPI_ISL_2620924, EPI_ISL_2620925, EPI_ISL_2620926, EPI_ISL_2620927, EPI_ISL_2620928, EPI_ISL_2620929, EPI_ISL_2620930, EPI_ISL_2620931, EPI_ISL_2620932, EPI_ISL_2620933, EPI_ISL_2620934, EPI_ISL_2620935, EPI_ISL_2620936, EPI_ISL_2620937, EPI_ISL_2620938, EPI_ISL_2620939, EPI_ISL_2620940, EPI_ISL_2620941, EPI_ISL_2620942, EPI_ISL_2620943, EPI_ISL_2620944, EPI_ISL_2620945, EPI_ISL_2620946, EPI_ISL_2620947, EPI_ISL_2620948, EPI_ISL_2620949, EPI_ISL_2620950, EPI_ISL_2620951, EPI_ISL_2620952, EPI_ISL_2620953, EPI_ISL_2620954, EPI_ISL_2620955, EPI_ISL_2620956 |           |                           |  |                                                       |  |                                                                                                                                                                                                                                                                         |  |

|                                                                                                                                                                                                                                                                                                                                                                                                                                                                                                                                               |                                                             |                                                                                                                                                                                                                                                                                                                                    |                                                                                                                                                                                                                                                                                                                                                                                                                                                                                                                                                    |
|-----------------------------------------------------------------------------------------------------------------------------------------------------------------------------------------------------------------------------------------------------------------------------------------------------------------------------------------------------------------------------------------------------------------------------------------------------------------------------------------------------------------------------------------------|-------------------------------------------------------------|------------------------------------------------------------------------------------------------------------------------------------------------------------------------------------------------------------------------------------------------------------------------------------------------------------------------------------|----------------------------------------------------------------------------------------------------------------------------------------------------------------------------------------------------------------------------------------------------------------------------------------------------------------------------------------------------------------------------------------------------------------------------------------------------------------------------------------------------------------------------------------------------|
| EPI_ISL_4503094<br>EPI_ISL_956311                                                                                                                                                                                                                                                                                                                                                                                                                                                                                                             | Islamic Hospital                                            | Institute of Tropical Disease, Universitas Airlangga                                                                                                                                                                                                                                                                               | Putri; Reinhart Gabriel; Stefanus Bernard; Umar Soh; Vania Gavrilă Wikasa; Yuni Suci Lestari                                                                                                                                                                                                                                                                                                                                                                                                                                                       |
| EPI_ISL_3730781, EPI_ISL_3730784, EPI_ISL_3730792, EPI_ISL_3730793, EPI_ISL_3730794, EPI_ISL_3730795, EPI_ISL_3730796, EPI_ISL_3730800, EPI_ISL_3730801, EPI_ISL_3730803, EPI_ISL_3730804, EPI_ISL_3730807, EPI_ISL_3799748, EPI_ISL_3922114, EPI_ISL_3922115, EPI_ISL_3922116, EPI_ISL_3922117, EPI_ISL_3922118, EPI_ISL_3922119, EPI_ISL_4030482, EPI_ISL_4030483, EPI_ISL_4030484, EPI_ISL_4030485, EPI_ISL_4468050, EPI_ISL_4475423, EPI_ISL_4520545, EPI_ISL_5031091, EPI_ISL_5031092, EPI_ISL_5031093, EPI_ISL_5031094, EPI_ISL_5462141 |                                                             |                                                                                                                                                                                                                                                                                                                                    | Aldise M Nastri; Dodo Anondo; Gatot Soegiarto; Jezy R Dewantari; Kazufumi Shimizu; Krisnoadi Rahardjo; Laksmi Wulandari; Maria I Lusida; Resti Yudhawati; Rima R Prasetya; Soetjipto; Yasuko Mori                                                                                                                                                                                                                                                                                                                                                  |
| see above                                                                                                                                                                                                                                                                                                                                                                                                                                                                                                                                     | KALGEN INNOLAB                                              | Genomik Solidaritas Indonesia Laboratorium                                                                                                                                                                                                                                                                                         | Andi Utama; Anna Christina Brazila; Annisa Muthiah Sukirman; Anuraj Shankar; Ariel Pradipta; Arih Daimah; Asma Mujahidah; Carissa Sintca Wijaya; David Hendra Haryanto; Dhahlia Agustina Cahyono; Dian Tri Wahyudi; Dwi Oktavia; Esti Rahayuning Tias; Gracia Felias Enos Korompis; Himawan Masyhuri; Jedidiah Abel Mehola; Louisa Markus; Meutia Ayuputeri Kumaheri; Neng Hilma Hamidah; Ngabila Salama; Reinhart Gabriel; Ridho Assidicky; Stefanus Bernard; Tiranti Vindha; Vania Gavrilă Wikasa; Vania Gavrilă Wikasa Dhahlia Agustina Cahyono |
| EPI_ISL_3208078, EPI_ISL_3208079, EPI_ISL_3208081                                                                                                                                                                                                                                                                                                                                                                                                                                                                                             | KIMIA FARMA / DINAS KESEHATAN DKI JAKARTA                   | Genomik Solidaritas Indonesia Laboratorium                                                                                                                                                                                                                                                                                         | Annisa Muthiah Sukirman; Anuraj Shankar; Ariel Pradipta; Carissa Sintca Wijaya; Gracia Felias Enos Korompis; Latifah Anandari; Meutia Ayuputeri Kumaheri; Reinhart Gabriel; Vania Gavrilă Wikasa                                                                                                                                                                                                                                                                                                                                                   |
| EPI_ISL_2854779                                                                                                                                                                                                                                                                                                                                                                                                                                                                                                                               | KKP Kelas II Cilacap                                        | National Institute of Health Research and Development                                                                                                                                                                                                                                                                              | Arie Ardiansyah Nugraha; Hana Apsari Pawestri; Hartanti Dian Ikawati; Kartika Dewi Puspa; Krisna Pangesti; Nelly Puspandari; Subangkit; Triyani Soekarso; Vivi Setiawaty                                                                                                                                                                                                                                                                                                                                                                           |
| EPI_ISL_1257859                                                                                                                                                                                                                                                                                                                                                                                                                                                                                                                               | KKP Soekarno Hatta                                          | National Institute of Health Research and Development                                                                                                                                                                                                                                                                              | Arie Ardiansyah Nugraha; Hana Apsari Pawestri; Hartanti Dian Ikawati; Kartika Dewi Puspa; Krisna Pangesti; Nelly Puspandari; Subangkit; Vivi Setiawaty                                                                                                                                                                                                                                                                                                                                                                                             |
| EPI_ISL_2932610                                                                                                                                                                                                                                                                                                                                                                                                                                                                                                                               | KOTA Yogya DKK Gondokusuman II                              | Genetics Working Group (Pokja Genetik) Faculty of Medicine, Public Health and Nursing Universitas Gadjah Mada (FK-KMK UGM); Disease Investigation Center Wates Ministry of Agriculture Indonesia; Department of Microbiology FK-KMK UGM; Laboratorium Diagnostik Yayasan Tahija World Mosquito Program (WMP) Yogyakarta Center for | Afiahayati; Alvina A Setiawan; Dwi AA Nugrahaniingsih; Dwi Indaryati; Edwin W. Daniwijaya; Eggi Arguni; Endah Supriyati; Gunadi; Hendra Wibawa; Indarto Sulistiyono; Kanza a Vujira; Kristy Iskandar; Ludhang P. Rizki; Marcellus; Mohamad S. Hakim; Nungki Anggorowati; Pramesti G Dewi; Siswanto; Titik Nuryastuti; Tri Wibawa                                                                                                                                                                                                                   |
| EPI_ISL_4885262, EPI_ISL_4885263, EPI_ISL_4951281                                                                                                                                                                                                                                                                                                                                                                                                                                                                                             | Kabupaten Karawang Lung Speciality Hospital                 | West Java Health Laboratory; School of Life Sciences and Technology, Institut Teknologi Bandung                                                                                                                                                                                                                                    | Azzania Fibriani; Cut Nur Cinthia Alamanda; Ema Rahmawati; Isak Solihin; Karimatu Khoirunnisa; Miftahul Faridi; Rifky Waluyajati Rachman; Rini Robiani; Ryan Bayusantika Ristandi                                                                                                                                                                                                                                                                                                                                                                  |
| EPI_ISL_3691649                                                                                                                                                                                                                                                                                                                                                                                                                                                                                                                               | Kantor Kesehatan Pelabuhan Bangka Belitung                  | National Institute of Health Research and Development                                                                                                                                                                                                                                                                              | Arie Ardiansyah Nugraha; Fajar Nur Sulistiyohadi; Hana Apsari Pawestri; Hartanti Dian Ikawati; Kartika Dewi Puspa; Krisna Pangesti; Nelly Puspandari; Subangkit; Triyani Soekarso; Vivi Setiawaty                                                                                                                                                                                                                                                                                                                                                  |
| EPI_ISL_4730569, EPI_ISL_4730570, EPI_ISL_4730571, EPI_ISL_4730572, EPI_ISL_5022954, EPI_ISL_5107815, EPI_ISL_5107816, EPI_ISL_5107817, EPI_ISL_5107818                                                                                                                                                                                                                                                                                                                                                                                       |                                                             |                                                                                                                                                                                                                                                                                                                                    |                                                                                                                                                                                                                                                                                                                                                                                                                                                                                                                                                    |
| see above                                                                                                                                                                                                                                                                                                                                                                                                                                                                                                                                     | Kantor Kesehatan Pelabuhan Kelas 2 Cilacap                  | National Institute of Health Research and Development                                                                                                                                                                                                                                                                              | Arie Ardiansyah Nugraha; Fajar Nur; Fajar Nur Sulistiyohadi; Hana Apsari Pawestri; Hartanti Dian Ikawati; Kartika Dewi Puspa; Krisna Pangesti; Nelly Puspandari; Subangkit; Sulistiyohadi; Triyani Soekarso; Vivi Setiawaty                                                                                                                                                                                                                                                                                                                        |
| EPI_ISL_2854781, EPI_ISL_2854782, EPI_ISL_2854783, EPI_ISL_2854784, EPI_ISL_2854785, EPI_ISL_2854786, EPI_ISL_2854787, EPI_ISL_2854788, EPI_ISL_2854789, EPI_ISL_2854790, EPI_ISL_2854791, EPI_ISL_2854792, EPI_ISL_2854793, EPI_ISL_2854794, EPI_ISL_2854795, EPI_ISL_2854796, EPI_ISL_2896199, EPI_ISL_2896201                                                                                                                                                                                                                              |                                                             |                                                                                                                                                                                                                                                                                                                                    |                                                                                                                                                                                                                                                                                                                                                                                                                                                                                                                                                    |
| see above                                                                                                                                                                                                                                                                                                                                                                                                                                                                                                                                     | Kantor Kesehatan Pelabuhan Kelas I Medan                    | National Institute of Health Research and Development                                                                                                                                                                                                                                                                              | Arie Ardiansyah Nugraha; Hana Apsari Pawestri; Hartanti Dian Ikawati; Kartika Dewi Puspa; Krisna Pangesti; Nelly Puspandari; Subangkit; Triyani Soekarso; Vivi Setiawaty                                                                                                                                                                                                                                                                                                                                                                           |
| EPI_ISL_2233091, EPI_ISL_2233092, EPI_ISL_2233093, EPI_ISL_2233096, EPI_ISL_2233097, EPI_ISL_2233098, EPI_ISL_2233099, EPI_ISL_2233100, EPI_ISL_2233101, EPI_ISL_2233102, EPI_ISL_2233103, EPI_ISL_2233104, EPI_ISL_2233105                                                                                                                                                                                                                                                                                                                   |                                                             |                                                                                                                                                                                                                                                                                                                                    |                                                                                                                                                                                                                                                                                                                                                                                                                                                                                                                                                    |
| see above                                                                                                                                                                                                                                                                                                                                                                                                                                                                                                                                     | Kantor Kesehatan Pelabuhan Kelas II Cilacap                 | National Institute of Health Research and Development                                                                                                                                                                                                                                                                              | Arie Ardiansyah Nugraha; Hana Apsari Pawestri; Hartanti Dian Ikawati; Kartika Dewi Puspa; Krisna Pangesti; Nelly Puspandari; Subangkit; Triyani Soekarso; Vivi Setiawaty                                                                                                                                                                                                                                                                                                                                                                           |
| EPI_ISL_3138838                                                                                                                                                                                                                                                                                                                                                                                                                                                                                                                               | Kantor Kesehatan Pelabuhan Kelas II Tarakan                 | National Institute of Health Research and Development                                                                                                                                                                                                                                                                              | Arie Ardiansyah Nugraha; Fajar Nur Sulistiyohadi; Hana Apsari Pawestri; Hartanti Dian Ikawati; Kartika Dewi Puspa; Krisna Pangesti; Nelly Puspandari; Subangkit; Triyani Soekarso; Vivi Setiawaty                                                                                                                                                                                                                                                                                                                                                  |
| EPI_ISL_2854757, EPI_ISL_2854758, EPI_ISL_2854759                                                                                                                                                                                                                                                                                                                                                                                                                                                                                             | Kantor Kesehatan Pelabuhan Kelas III Bengkulu               | National Institute of Health Research and Development                                                                                                                                                                                                                                                                              | Arie Ardiansyah Nugraha; Hana Apsari Pawestri; Hartanti Dian Ikawati; Kartika Dewi Puspa; Krisna Pangesti; Nelly Puspandari; Subangkit; Triyani Soekarso; Vivi Setiawaty                                                                                                                                                                                                                                                                                                                                                                           |
| EPI_ISL_1915564, EPI_ISL_1915565, EPI_ISL_2047555, EPI_ISL_2047556, EPI_ISL_2047557, EPI_ISL_2047558, EPI_ISL_2047559                                                                                                                                                                                                                                                                                                                                                                                                                         |                                                             |                                                                                                                                                                                                                                                                                                                                    |                                                                                                                                                                                                                                                                                                                                                                                                                                                                                                                                                    |
| see above                                                                                                                                                                                                                                                                                                                                                                                                                                                                                                                                     | Kantor Pengelola Sumbawa Technopark                         | National Institute of Health Research and Development                                                                                                                                                                                                                                                                              | Arie Ardiansyah Nugraha; Arief Budi Witarto; Hana Apsari Pawestri; Hartanti Dian Ikawati; Kartika Dewi Puspa; Krisna Pangesti; Laily Indrayanti; Lalu Hamzi Fikri; Nelly Puspandari; Nurhandini Eka Dewi; Rian Adha Ardinata; Subangkit; Triyani Soekarso; Vivi Setiawaty                                                                                                                                                                                                                                                                          |
| EPI_ISL_833498                                                                                                                                                                                                                                                                                                                                                                                                                                                                                                                                | Kartika Pulomas Hospital, Jakarta, Indonesia                | Biosafety Level-3 Laboratory, Indonesian Institute of Sciences (LIPI)                                                                                                                                                                                                                                                              | Ade Andriani; Ahmad Fathoni; Andri Wardiana; Anggia Prasetyoputri; Anik Budhi Dharmayanthi; Isa Nuryana; Pinka Alisa Diena Shafa; Ratih Asmana Ningrum; Syam Budi Iryanto; Winda Tasia                                                                                                                                                                                                                                                                                                                                                             |
| EPI_ISL_1398357                                                                                                                                                                                                                                                                                                                                                                                                                                                                                                                               | Kasih Bunda Hospital                                        | West Java Health Laboratory; School of Life Sciences and Technology, Institut Teknologi Bandung                                                                                                                                                                                                                                    | Azzania Fibriani; Cut Nur Cinthia Alamanda; Ema Rahmawati; Isak Solihin; Kamila Tania; Karimatu Khoirunnisa; Miftahul Faridi; Rifky Waluyajati Rachman; Rini Robiani; Ryan Bayusantika Ristandi                                                                                                                                                                                                                                                                                                                                                    |
| EPI_ISL_518820, EPI_ISL_833388, EPI_ISL_833389, EPI_ISL_833390, EPI_ISL_833391, EPI_ISL_833495, EPI_ISL_833497, EPI_ISL_833500, EPI_ISL_833508                                                                                                                                                                                                                                                                                                                                                                                                |                                                             |                                                                                                                                                                                                                                                                                                                                    |                                                                                                                                                                                                                                                                                                                                                                                                                                                                                                                                                    |
| see above                                                                                                                                                                                                                                                                                                                                                                                                                                                                                                                                     | Klinik Apotek Dein, Jakarta, Indonesia                      | Biosafety Level-3 Laboratory, Indonesian Institute of Sciences (LIPI)                                                                                                                                                                                                                                                              | Ade Andriani; Ahmad Fathoni; Akhirta Atikana; Alfi Taufik Fathurahman; Andri Wardiana; Anggia Prasetyoputri; Anik Budhi Dharmayanthi; Ario Betha Juanssilfero; Asep M Ridwanulloh; Asrul M. Foad; Dadang Supriatna; Dian Fitria Agustiyanti; Fahrurrozy; Hariyatu; Herman Irawan; Isa Nuryana; Pamela Apriliana; Popi Hadi Wisnuwardhani; Puspita Lisdijanti; Rath Asmana Ningrum; Rifki Sadikin; Saiful anwar; Sri Swasthikawati; Syam Budi Iryanto; Wien Kusharyoto                                                                              |
| EPI_ISL_1020203, EPI_ISL_1117457, EPI_ISL_2840889                                                                                                                                                                                                                                                                                                                                                                                                                                                                                             | Klinik Apotik Dien, Jakarta                                 | Biosafety Level-3 Laboratory, Indonesian Institute of Sciences (LIPI)                                                                                                                                                                                                                                                              | Ade Andriani; Anik Budhi Dharmayanthi; Asep M. Ridwanulloh; Asep M. Ridwanulloh; Eko Wahyu Putro; Eko Wahyu Putro; Gita Sya Putra; Hariyatu; Inswasti Cahyani; Listiana Oktavia; Matthew W. Loose; Mohammad Ilyas; Sugiyono Saputra; Susanti; Syam Budi Iryanto; Wien Kusharyoto; Yuliawati                                                                                                                                                                                                                                                        |
| EPI_ISL_1284204                                                                                                                                                                                                                                                                                                                                                                                                                                                                                                                               | Klinik Ciputra Medical Center                               | Eijkman Institute for Molecular Biology, Ministry of Research and Technology/National Agency for Research and Innovation                                                                                                                                                                                                           | Amin Soebandrio; Edison Johar; Frilasita A Yudhaputri; Hidayat Trimarsanto; Iskandar Adnan; Khin Saw Myint; Lydia V. Panggalo; Safarina G Malik; Sukma Oktavianthi; Willy Agustine                                                                                                                                                                                                                                                                                                                                                                 |
| EPI_ISL_2860294, EPI_ISL_2860295, EPI_ISL_2860347                                                                                                                                                                                                                                                                                                                                                                                                                                                                                             | Klinik Dr Nurdin                                            | Biosafety Level-3 Laboratory, Indonesian Institute of Sciences (LIPI)                                                                                                                                                                                                                                                              | Andri Wardiana; Anggia Prasetyoputri; Anik B. Dharmayanthi; Asep M. Ridwanulloh; Asep M.Ridwanulloh; Fahrurrozi; Indriawati; Linda Sukmarini; Listiana Oktavia; Nova D. Yanthi; Ruby Setiawan; Syam B. Iryanto; Yuliawati                                                                                                                                                                                                                                                                                                                          |
| EPI_ISL_2854713, EPI_ISL_2854714, EPI_ISL_2854715, EPI_ISL_2854716, EPI_ISL_2854717, EPI_ISL_2854718                                                                                                                                                                                                                                                                                                                                                                                                                                          | Klinik Kimia Farma Garuda                                   | National Institute of Health Research and Development                                                                                                                                                                                                                                                                              | ; Arie Ardiansyah Nugraha; Hana Apsari Pawestri; Hartanti Dian Ikawati; Kartika Dewi Puspa; Krisna Pangesti; Nelly Puspandari; Subangkit; Triyani Soekarso; Vivi Setiawaty                                                                                                                                                                                                                                                                                                                                                                         |
| EPI_ISL_2614679                                                                                                                                                                                                                                                                                                                                                                                                                                                                                                                               | Klinik Lamina                                               | Eijkman Institute for Molecular Biology, National Research and Innovation Agency                                                                                                                                                                                                                                                   | Amin Soebandrio; Edison Johar; Frilasita A Yudhaputri; Hidayat Trimarsanto; Iskandar Adnan; Khin Saw Myint; Lidwina Priliani; Lydia V. Panggalo; Muhammad Rezki Rasyak; Safarina G Malik; Sukma Oktavianthi; Willy Agustine                                                                                                                                                                                                                                                                                                                        |
| EPI_ISL_2860281, EPI_ISL_2860282, EPI_ISL_2860283, EPI_ISL_2860284, EPI_ISL_2860285, EPI_ISL_2860286, EPI_ISL_2860287, EPI_ISL_2860288, EPI_ISL_2860289, EPI_ISL_2860348, EPI_ISL_2860349, EPI_ISL_2860368                                                                                                                                                                                                                                                                                                                                    |                                                             |                                                                                                                                                                                                                                                                                                                                    |                                                                                                                                                                                                                                                                                                                                                                                                                                                                                                                                                    |
| see above                                                                                                                                                                                                                                                                                                                                                                                                                                                                                                                                     | Klinik Primera Clinica                                      | Biosafety Level-3 Laboratory, Indonesian Institute of Sciences (LIPI)                                                                                                                                                                                                                                                              | Andri Wardiana; Anggia Prasetyoputri; Anik B. Dharmayanthi; Annisa D. Septiani; Asep M. Ridwanulloh; Asep M.Ridwanulloh; Fahrurrozi; Idris; Indriawati; Linda Sukmarini; Listiana Oktavia; Lusiana; Masrukhin; Maya Komalasari; Nova D. Yanthi; Rath A. Ningrum; Ruby Setiawan; Sri Swasthikawati; Sugiyono Saputra; Syam B. Iryanto; Yuliawati                                                                                                                                                                                                    |
| EPI_ISL_4004697, EPI_ISL_4004704                                                                                                                                                                                                                                                                                                                                                                                                                                                                                                              | Klinik Primera Clinica                                      | National Research and Innovation Agency (BRIN-Indonesia)                                                                                                                                                                                                                                                                           | Ahmad Fathoni; Anggia Prasetyoputri; Anik B. Dharmayanthi; Asep M. Ridwanulloh; Hariyatu; Indriawati; Rifki Sadikin; Sugiyono Saputra; Suvia Widyaningrum; Syam B. Iryanto                                                                                                                                                                                                                                                                                                                                                                         |
| EPI_ISL_2844826                                                                                                                                                                                                                                                                                                                                                                                                                                                                                                                               | Klinik Primera Clinica, Jakarta                             | Biosafety Level-3 Laboratory, Indonesian Institute of Sciences (LIPI)                                                                                                                                                                                                                                                              | Anggia Prasetyoputri; Erwin F. Hasrianda; Fahrurrozi; Herjuno A. Nugroho; Nova D. Yanthi; Wien Kusharyoto                                                                                                                                                                                                                                                                                                                                                                                                                                          |
| EPI_ISL_4106128                                                                                                                                                                                                                                                                                                                                                                                                                                                                                                                               | Klinik Primera Clinica, Jakarta                             | National Research and Innovation Agency (BRIN-Indonesia, VenomCoV Project Team)                                                                                                                                                                                                                                                    | Andri Wardiana; Anggia Prasetyoputri; Erwin F. Hasrianda; Fahrurrozi; Herjuno A. Nugroho; Nova D. Yanthi; Sugiyono Saputra; Syam B. Iryanto                                                                                                                                                                                                                                                                                                                                                                                                        |
| EPI_ISL_1789112                                                                                                                                                                                                                                                                                                                                                                                                                                                                                                                               | Klinik Tanjung Laboratory                                   | Institute of Tropical Disease, Universitas Airlangga                                                                                                                                                                                                                                                                               | Aldise M Nastri; Gatot Soegiarto; Jezy R Dewantari; Kazufumi Shimizu; Krisnoadi Rahardjo; Laksmi Wulandari; Maria I Lusida; Resti Yudhawati; Rima R Prasetya; Soetjipto; Yasuko Mori                                                                                                                                                                                                                                                                                                                                                               |
| EPI_ISL_1072962                                                                                                                                                                                                                                                                                                                                                                                                                                                                                                                               | Kota Nopan Primary Health Center, Mandailing Natal District | Institute of Tropical Disease, Universitas Airlangga; Faculty of Medicine, Universitas Sumatera Utara                                                                                                                                                                                                                              | Aldise M Nastri; Franciscus Ginting; Inke N D Lubis; Irbah R Nainggolan; Jezy R Dewantari; Kazufumi Shimizu; Krisnoadi Rahardjo; Maria I Lusida; Meliani; Mirzan Hasibuan; Muhammad Ichwan; R Andika D Cahyadi; R Lia Kusumawati; Ramadhan Bestari; Rima R Prasetya; Soetjipto; Yasuko Mori                                                                                                                                                                                                                                                        |
| EPI_ISL_1398353, EPI_ISL_1398369, EPI_ISL_1615617                                                                                                                                                                                                                                                                                                                                                                                                                                                                                             | Kuningan Public Health                                      | West Java Health Laboratory; School of Life Sciences and Technology, Institut Teknologi Bandung                                                                                                                                                                                                                                    | Aulia Saraswati Wicaksono; Azzania Fibriani; Cut Nur Cinthia Alamanda; Ema Rahmawati; Isak Solihin; Kamila Tania; Karimatu Khoirunnisa; Miftahul Faridi; Rifky Waluyajati Rachman; Rini Robiani; Ryan Bayusantika Ristandi                                                                                                                                                                                                                                                                                                                         |
| EPI_ISL_747239                                                                                                                                                                                                                                                                                                                                                                                                                                                                                                                                | Kuningan Public Health Office                               | West Java Health Laboratory; School of Life Sciences and Technology, Institut Teknologi Bandung                                                                                                                                                                                                                                    | Azzania Fibriani; Cut Nur Cinthia Alamanda; Ema Rahmawati; Isak Solihin; Karimatu Khoirunnisa; Miftahul Faridi; Rifky Waluyajati Rachman; Rini Robiani; Ryan Bayusantika Ristandi                                                                                                                                                                                                                                                                                                                                                                  |
| EPI_ISL_4090576                                                                                                                                                                                                                                                                                                                                                                                                                                                                                                                               | LAB Bina Husada Mitra Keluarga                              | National Institute of Health Research and Development                                                                                                                                                                                                                                                                              | Arie Ardiansyah Nugraha; Fajar Nur Sulistiyohadi; Hana Apsari Pawestri; Hartanti Dian Ikawati; Kartika Dewi Puspa; Krisna Pangesti; Nelly Puspandari; Subangkit; Triyani Soekarso; Vivi Setiawaty                                                                                                                                                                                                                                                                                                                                                  |
| EPI_ISL_4508301, EPI_ISL_4508302, EPI_ISL_4508303, EPI_ISL_4508304, EPI_ISL_4508305, EPI_ISL_4508306, EPI_ISL_4508307, EPI_ISL_4508308, EPI_ISL_4508309, EPI_ISL_4508310, EPI_ISL_4508311, EPI_ISL_4508312, EPI_ISL_4508313, EPI_ISL_4508314, EPI_ISL_4508315                                                                                                                                                                                                                                                                                 |                                                             |                                                                                                                                                                                                                                                                                                                                    |                                                                                                                                                                                                                                                                                                                                                                                                                                                                                                                                                    |
| see above                                                                                                                                                                                                                                                                                                                                                                                                                                                                                                                                     | LAB Hamera Sarana Indonesia                                 | National Institute of Health Research and Development                                                                                                                                                                                                                                                                              | Arie Ardiansyah Nugraha; Fajar Nur Sulistiyohadi; Hana Apsari Pawestri; Hartanti Dian Ikawati; Kartika Dewi Puspa; Krisna Pangesti; Nelly Puspandari; Subangkit; Triyani Soekarso; Vivi Setiawaty                                                                                                                                                                                                                                                                                                                                                  |
| EPI_ISL_2790716, EPI_ISL_2790717, EPI_ISL_2790718, EPI_ISL_2790719, EPI_ISL_2790720, EPI_ISL_3418685                                                                                                                                                                                                                                                                                                                                                                                                                                          | LAB MIKROBIOLOGI FKUI / DINAS KESEHATAN DKI JAKARTA         | Genomik Solidaritas Indonesia Laboratorium                                                                                                                                                                                                                                                                                         | Alfin Mohammad Abdillah; Anna Christina Brazila; Annisa Muthiah Sukirman; Anuraj Shankar; Ariel Pradipta; Carissa Sintca Wijaya; Dhahlia Agustina Cahyono; Dwi Oktavia; Fera Ibrahim; Gracia Felias Enos Korompis; Meutia Ayuputeri Kumaheri; Ngabila Salama; Normastuti Adhini Tanyto; Pratiwi Sudarmono; Reinhart Gabriel; Tiranti Vindha; Vania Gavrilă Wikasa; Widyastuti; Yulia Rosa                                                                                                                                                          |
| EPI_ISL_2617496, EPI_ISL_2617497, EPI_ISL_2617498                                                                                                                                                                                                                                                                                                                                                                                                                                                                                             | LAB Mitra Keluarga Pratama                                  | National Institute of Health Research and Development                                                                                                                                                                                                                                                                              | Arie Ardiansyah Nugraha; Hana Apsari Pawestri; Hartanti Dian Ikawati; Kartika Dewi Puspa; Krisna Pangesti; Nelly Puspandari; Subangkit; Triyani Soekarso; Vivi Setiawaty                                                                                                                                                                                                                                                                                                                                                                           |
| EPI_ISL_2617500                                                                                                                                                                                                                                                                                                                                                                                                                                                                                                                               | LAB RS Hermina Depok                                        | National Institute of Health Research and Development                                                                                                                                                                                                                                                                              | Arie Ardiansyah Nugraha; Hana Apsari Pawestri; Hartanti Dian Ikawati; Kartika Dewi Puspa; Krisna Pangesti; Nelly Puspandari; Subangkit; Triyani Soekarso; Vivi Setiawaty                                                                                                                                                                                                                                                                                                                                                                           |
| EPI_ISL_3138787,                                                                                                                                                                                                                                                                                                                                                                                                                                                                                                                              | LAB RS Kartika Pulomas                                      | National Institute of Health Research and Development                                                                                                                                                                                                                                                                              | Arie Ardiansyah Nugraha; Fajar Nur Sulistiyohadi; Hana Apsari Pawestri; Hartanti Dian Ikawati; Kartika Dewi Puspa; Krisna Pangesti; Nelly Puspandari; Subangkit; Triyani Soekarso; Vivi Setiawaty                                                                                                                                                                                                                                                                                                                                                  |

[illegible]

|                                                                                                                                                                                                                                                                                                                                                                                       |                                                                          |                                                                                                                                                                                                               |                                                                                                                                                                                                                                                                                                                                                                                                                                                                                                                            |
|---------------------------------------------------------------------------------------------------------------------------------------------------------------------------------------------------------------------------------------------------------------------------------------------------------------------------------------------------------------------------------------|--------------------------------------------------------------------------|---------------------------------------------------------------------------------------------------------------------------------------------------------------------------------------------------------------|----------------------------------------------------------------------------------------------------------------------------------------------------------------------------------------------------------------------------------------------------------------------------------------------------------------------------------------------------------------------------------------------------------------------------------------------------------------------------------------------------------------------------|
| EPI_ISL_1469288,<br>EPI_ISL_1469289,<br>EPI_ISL_1534708,<br>EPI_ISL_2106981                                                                                                                                                                                                                                                                                                           | Labkesda Karawang                                                        | National Institute of Health Research and Development                                                                                                                                                         | Arie Ardiansyah Nugraha; Hana Aparsi Pawestri; Hartanti Dian Ikawati; Kartika Dewi Puspa; Krisna Pangesti; Nelly Puspandari; Subangkit; Vivi Setiawaty                                                                                                                                                                                                                                                                                                                                                                     |
| EPI_ISL_2854726, EPI_ISL_2854727, EPI_ISL_2854728, EPI_ISL_3216541, EPI_ISL_3216542, EPI_ISL_3216543, EPI_ISL_3216544, EPI_ISL_3216545                                                                                                                                                                                                                                                | see above                                                                | Labkesda Kota Tangerang                                                                                                                                                                                       | National Institute of Health Research and Development<br>; Arie Ardiansyah Nugraha; Fajar Nur Sulistiyohadi; Hana Aparsi Pawestri; Hartanti Dian Ikawati; Kartika Dewi Puspa; Krisna Pangesti; Nelly Puspandari; Subangkit; Triyani Soekarso; Vivi Setiawaty                                                                                                                                                                                                                                                               |
| EPI_ISL_3691587, EPI_ISL_3691588, EPI_ISL_3691589, EPI_ISL_3691591, EPI_ISL_3691644, EPI_ISL_3691645, EPI_ISL_3691646, EPI_ISL_3691647, EPI_ISL_3691648, EPI_ISL_3691669, EPI_ISL_3691670, EPI_ISL_3691671, EPI_ISL_3691673, EPI_ISL_3691674, EPI_ISL_3691675, EPI_ISL_3691676, EPI_ISL_3691677                                                                                       | see above                                                                | Labkesda Pangkalpinang                                                                                                                                                                                        | National Institute of Health Research and Development<br>Arie Ardiansyah Nugraha; Fajar Nur Sulistiyohadi; Hana Aparsi Pawestri; Hartanti Dian Ikawati; Kartika Dewi Puspa; Krisna Pangesti; Nelly Puspandari; Subangkit; Triyani Soekarso; Vivi Setiawaty                                                                                                                                                                                                                                                                 |
| EPI_ISL_2854731, EPI_ISL_2854732, EPI_ISL_2854733, EPI_ISL_2854734, EPI_ISL_2854735, EPI_ISL_2854736, EPI_ISL_3138810, EPI_ISL_3138811, EPI_ISL_3138812                                                                                                                                                                                                                               | see above                                                                | Labkesda Prov DKI Jakarta                                                                                                                                                                                     | National Institute of Health Research and Development<br>; Arie Ardiansyah Nugraha; Fajar Nur Sulistiyohadi; Hana Aparsi Pawestri; Hartanti Dian Ikawati; Kartika Dewi Puspa; Krisna Pangesti; Nelly Puspandari; Subangkit; Triyani Soekarso; Vivi Setiawaty                                                                                                                                                                                                                                                               |
| EPI_ISL_2233094                                                                                                                                                                                                                                                                                                                                                                       | Labkesda Prov Kai Tim                                                    | National Institute of Health Research and Development                                                                                                                                                         | Arie Ardiansyah Nugraha; Hana Aparsi Pawestri; Hartanti Dian Ikawati; Kartika Dewi Puspa; Krisna Pangesti; Nelly Puspandari; Subangkit; Triyani Soekarso; Vivi Setiawaty                                                                                                                                                                                                                                                                                                                                                   |
| EPI_ISL_3946306                                                                                                                                                                                                                                                                                                                                                                       | Labkesda Prov. DKI Jakarta                                               | Genomik Solidaritas Indonesia Laboratorium                                                                                                                                                                    | Annisa Muthiah Sukirman; Anuraj Shankar; Ariel Pradipta; Carissa Sintca Wijaya; Dhahlia Agustina Cahyono; Dwi Oktavia; Gracia Felias Enos Korompis; Himawan Masyhuri; Louisa Markus; Meutia Ayuputeri Kumaheri; Neng Hilma Hamidah; Ngabila Salama; Pratiwi Srikandi Yudhastari; Suhartiningih; Syifa Khairunnisa; Tiranti Vindha                                                                                                                                                                                          |
| EPI_ISL_3548629                                                                                                                                                                                                                                                                                                                                                                       | Laboearorium RSPP                                                        | Genomik Solidaritas Indonesia Laboratorium                                                                                                                                                                    | Annisa Muthiah Sukirman; Anuraj Shankar; Ariel Pradipta; Carissa Sintca Wijaya; Dhahlia Agustina Cahyono; Dian Prastiti; Dwi Oktavia; Gracia Felias Enos Korompis; Louisa Markus; Meutia Ayuputeri Kumaheri; Neng Hilma Hamidah; Ngabila Salama; Tiranti Vindha; Vania Gavrla Wikasa                                                                                                                                                                                                                                       |
| EPI_ISL_3401859,<br>EPI_ISL_3401868,<br>EPI_ISL_3401872,<br>EPI_ISL_3401873                                                                                                                                                                                                                                                                                                           | Laboratorium RSUP Fatmawati                                              | Genomik Solidaritas Indonesia Laboratorium                                                                                                                                                                    | Annisa Muthiah Sukirman; Anuraj Shankar; Ariel Pradipta; Carissa Sintca Wijaya; Devi; Dhahlia Agustina Cahyono; Dwi Oktavia; Gracia Felias Enos Korompis; Himawan Masyhuri; Jerry; Lidya Utami; Loli Simajuntak; Louisa Markus; Meutia Ayuputeri Kumaheri; Ngabila Salama; Siska Situmorang; Tiranti Vindha; Triana Puspita Dewi; Vania Gavrla Wikasa                                                                                                                                                                      |
| EPI_ISL_5103932, EPI_ISL_5103934, EPI_ISL_5103935, EPI_ISL_5103936, EPI_ISL_5103937, EPI_ISL_5103938, EPI_ISL_5103939, EPI_ISL_5103940, EPI_ISL_5103941, EPI_ISL_5103942, EPI_ISL_5103943, EPI_ISL_5103944, EPI_ISL_5103945, EPI_ISL_5103946, EPI_ISL_5103947, EPI_ISL_5103948, EPI_ISL_5103950, EPI_ISL_5103951, EPI_ISL_5103952, EPI_ISL_5103953, EPI_ISL_5103954, EPI_ISL_5103955, | see above                                                                | Laboratorium Biologi Molekuler, Patologi Klinik RS Hasan Sadikin                                                                                                                                              | Laboratorium Genetik Molekuler, Biomedik Lanjut, FK UNPAD<br>Chrysanti Murad; Delita Prihatni; Dwi Agustian; Fensi Amalia; Ida Parwati; Jessi Annisa; Lidya Chaidir; Nuni Haeruni; Nurul Setia Rahayu; Savira Ekawardhani; Shinta; Tri Hanggono Ahmad; Yanu; Yeni Rendieni; Yulia Sribudiani                                                                                                                                                                                                                               |
| EPI_ISL_5103933,<br>EPI_ISL_5103949                                                                                                                                                                                                                                                                                                                                                   | Laboratorium Biomolekuler RSUD Al Ihsan                                  | Laboratorium Genetik Molekuler, Biomedik Lanjut, FK UNPAD                                                                                                                                                     | Chrysanti Murad; Dewi Rinakanti; Dwi Agustian; Fensi Amalia; Ida Parwati; Jessi Annisa; Lidya Chaidir; Nuni Haeruni; Nurul Setia Rahayu; Savira Ekawardhani; Shinta; Tri Hanggono Ahmad; Yanu; Yeni Rendieni; Yulia Sribudiani                                                                                                                                                                                                                                                                                             |
| EPI_ISL_5022784, EPI_ISL_5022785, EPI_ISL_5022786, EPI_ISL_5022787, EPI_ISL_5022788, EPI_ISL_5022789, EPI_ISL_5022790, EPI_ISL_5022791, EPI_ISL_5022792, EPI_ISL_5022793, EPI_ISL_5022794, EPI_ISL_5022795, EPI_ISL_5022796, EPI_ISL_5022797, EPI_ISL_5022798, EPI_ISL_5022799, EPI_ISL_5022803, EPI_ISL_5022804, EPI_ISL_5022805, EPI_ISL_5022806, EPI_ISL_5022807, EPI_ISL_5022808, | see above                                                                | Laboratorium Hamera Sarana Indonesia                                                                                                                                                                          | National Institute of Health Research and Development<br>Arie Ardiansyah Nugraha; Fajar Nur Sulistiyohadi; Hana Aparsi Pawestri; Hartanti Dian Ikawati; Kartika Dewi Puspa; Krisna Pangesti; Nelly Puspandari; Subangkit; Triyani Soekarso; Vivi Setiawaty                                                                                                                                                                                                                                                                 |
| EPI_ISL_1415898                                                                                                                                                                                                                                                                                                                                                                       | Laboratorium Intibios Karawang                                           | National Institute of Health Research and Development                                                                                                                                                         | Arie Ardiansyah Nugraha; Hana Aparsi Pawestri; Hartanti Dian Ikawati; Kartika Dewi Puspa; Krisna Nur Andriana Pangesti; Nelly Puspandari; Subangkit; Vivi Setiawaty                                                                                                                                                                                                                                                                                                                                                        |
| EPI_ISL_3030055                                                                                                                                                                                                                                                                                                                                                                       | Laboratorium Kesehatan Daerah Kota Bandung, Dinas Kesehatan Kota Bandung | Eijkman Institute for Molecular Biology, National Research and Innovation Agency; West Java Health Laboratory                                                                                                 | Amin Soebandrio; Azzania Fibriani; Cut Nur Cinthia Alamanda; Edison Johar; Ema Rahmawati; Frilasita A Yudhaputri; Hidayat Trimarsanto; Husna Nugrahapraja; Iskandar Adnan; Khin Saw Myint; Lidwina Priliani; Lydia V. Panggalo; Muhammad Rezki Rasyak; Rifky Waluyajati Rachman; Ryan Bayusantika Ristandi; Safarina G Malik; Sheila Widia Trisakti; Sukma Oktavianthi; Tati Sutarti Sastrowiyoto; Usman Abdul Jabar; Willy Agustine                                                                                       |
| EPI_ISL_4056004                                                                                                                                                                                                                                                                                                                                                                       | Laboratorium Kesehatan Daerah Surabaya                                   | Institute of Tropical Disease, Universitas Airlangga                                                                                                                                                          | Aldise M Nastri; Gatot Soegiarto; Jezzy R Dewantari; Kazufumi Shimizu; Kohar Hari Santoso; Krisnodo Rahardjo; Laksmi Wulandari; Maria I Lusida; Resti Yudhawati; Rima R Prasetya; Soetjipto; Yasuko Mori                                                                                                                                                                                                                                                                                                                   |
| EPI_ISL_5536496, EPI_ISL_5536511, EPI_ISL_5536512, EPI_ISL_5536518, EPI_ISL_5536522, EPI_ISL_5536526, EPI_ISL_5536528, EPI_ISL_5536529, EPI_ISL_5536553, EPI_ISL_5536558, EPI_ISL_5536559, EPI_ISL_5536560, EPI_ISL_5536561, EPI_ISL_5536568, EPI_ISL_5536571, EPI_ISL_5536574, EPI_ISL_5536575                                                                                       | see above                                                                | Laboratorium Kesehatan Kab. Bogor                                                                                                                                                                             | National Research and Innovation Agency (BRIN-Indonesia, VenomCoV Project Team); Dinas Kesehatan Kab. Bogor<br>Ahmad R. Al Fiqri; Alvira R. Sativa; Anggia Prasetyoputri; Anik B. Dharmayanthi; Dimas Prapanca; Gustomo; Indriawati; Isnaini Z. Asyifa; Muhammad M. Adzdzakiy; Ratih A. Ningrum; Sugiyono Saputra; Syaiful Rizal; Syam B. Iryanto                                                                                                                                                                          |
| EPI_ISL_5796080,<br>EPI_ISL_5796081                                                                                                                                                                                                                                                                                                                                                   | Laboratorium Kesehatan Provinsi Bali                                     | National Institute of Health Research and Development                                                                                                                                                         | Arie Ardiansyah Nugraha; Fajar Nur Sulistiyohadi; Hana Aparsi Pawestri; Hartanti Dian Ikawati; Kartika Dewi Puspa; Krisna Pangesti; Nelly Puspandari; Subangkit; Triyani Soekarso; Vivi Setiawaty                                                                                                                                                                                                                                                                                                                          |
| EPI_ISL_511879                                                                                                                                                                                                                                                                                                                                                                        | Laboratorium Kesehatan Provinsi Jawa Barat                               | Molecular Genetics Laboratory-Faculty of Medicine-Universitas Padjadjaran; School of Life Sciences and Technology & School of Pharmacy-Institut Teknologi Bandung; Laboratorium Kesehatan Provinsi Jawa Barat | Agung Eru Wibowo; Azzania Fibriani; Catur Riani; Cut Nur Cinthia Alamanda; Ema Rahmawati; Hammam Riza; Hesti Lina Wiraswati; Husna Nugrahapraja; Lia Faridah; Marselina Irasonia Tan; Rifky Waluyajati Rachman; Ryan Bayusantika Ristandi; Savira Ekawardhani; Soni Solistia Wirawan; Tarwadi; Yulia Sribudiani                                                                                                                                                                                                            |
| EPI_ISL_528745                                                                                                                                                                                                                                                                                                                                                                        | Laboratorium Kesehatan Provinsi Jawa Barat                               | School of Life Sciences and Technology & School of Pharmacy-Institut Teknologi Bandung; Molecular Genetics Laboratory-Faculty of Medicine-Universitas Padjadjaran; Laboratorium Kesehatan Provinsi Jawa Barat | Agung Eru Wibowo; Azzania Fibriani; Catur Riani; Cut Nur Cinthia Alamanda; Ema Rahmawati; Fensi Amalina; Hammam Riza; Hesti Lina Wiraswati; Husna Nugrahapraja; Irvan Faizal; Lia Faridah; Marselina Irasonia Tan; Mas Rizky A.A. Syamsunarno; Rifky Waluyajati Rachman; Ryan Bayusantika Ristandi; Savira Ekawardhani; Sony Solistia Wirawan; Tarwadi; Tri Hanggono Achmad; Yulia Sribudiani                                                                                                                              |
| EPI_ISL_3385402, EPI_ISL_3385403, EPI_ISL_3385404, EPI_ISL_3385405, EPI_ISL_3385406, EPI_ISL_3385407, EPI_ISL_3385408, EPI_ISL_3385409, EPI_ISL_3385410, EPI_ISL_3385411, EPI_ISL_3385412, EPI_ISL_3385413, EPI_ISL_3385414, EPI_ISL_3385415, EPI_ISL_3385416, EPI_ISL_3386093, EPI_ISL_3404356, EPI_ISL_3404357, EPI_ISL_3404358, EPI_ISL_3404359, EPI_ISL_3404360, EPI_ISL_3404361, | see above                                                                | Laboratorium Khusus Speedlab Jakarta                                                                                                                                                                          | Genomik Solidaritas Indonesia Laboratorium<br>Annisa Muthiah Sukirman; Anuraj Shankar; Ariel Pradipta; Carissa Sintca Wijaya; Dhahlia Agustina Cahyono; Gracia Felias Enos Korompis; Himawan Masyhuri; Louisa Markus; Meutia Ayuputeri Kumaheri; Neng Hilma Hamidah; Vania Gavrla Wikasa                                                                                                                                                                                                                                   |
| EPI_ISL_791977                                                                                                                                                                                                                                                                                                                                                                        | Laboratorium Mikrobiologi Samarinda                                      | National Institute of Health Research and Development                                                                                                                                                         | AA; HA; HD; Ikawati; KD; KNA; N; Nugraha; Pangesti; Pawestri; Puspa; Puspandari; Setiawaty; Soekarso; Subangkit; T; Tandirogang; V; Yadi                                                                                                                                                                                                                                                                                                                                                                                   |
| EPI_ISL_3691592, EPI_ISL_3691625, EPI_ISL_3691626, EPI_ISL_3691627, EPI_ISL_3691628, EPI_ISL_3691629, EPI_ISL_3691630, EPI_ISL_3691631, EPI_ISL_3691632, EPI_ISL_3691633, EPI_ISL_3691634, EPI_ISL_3691635, EPI_ISL_3691636, EPI_ISL_3691637, EPI_ISL_3691638, EPI_ISL_3691639, EPI_ISL_3691640, EPI_ISL_3691641, EPI_ISL_3691642, EPI_ISL_3691643                                    | see above                                                                | Laboratorium PCR PT Halmahera Persada Lygend                                                                                                                                                                  | National Institute of Health Research and Development<br>Arie Ardiansyah Nugraha; Fajar Nur Sulistiyohadi; Hana Aparsi Pawestri; Hartanti Dian Ikawati; Kartika Dewi Puspa; Krisna Pangesti; Nelly Puspandari; Subangkit; Triyani Soekarso; Vivi Setiawaty                                                                                                                                                                                                                                                                 |
| EPI_ISL_3691594, EPI_ISL_3691596, EPI_ISL_3691617, EPI_ISL_3691618, EPI_ISL_3691619, EPI_ISL_3691620, EPI_ISL_3691621, EPI_ISL_3691622, EPI_ISL_3691623, EPI_ISL_3691624                                                                                                                                                                                                              | see above                                                                | Laboratorium PCR PT Nusa Halmahera Minerals                                                                                                                                                                   | National Institute of Health Research and Development<br>Arie Ardiansyah Nugraha; Fajar Nur Sulistiyohadi; Hana Aparsi Pawestri; Hartanti Dian Ikawati; Kartika Dewi Puspa; Krisna Pangesti; Nelly Puspandari; Subangkit; Triyani Soekarso; Vivi Setiawaty                                                                                                                                                                                                                                                                 |
| EPI_ISL_5307520                                                                                                                                                                                                                                                                                                                                                                       | Laboratorium RS Al Islam                                                 | Laboratorium Genetik Molekuler, Biomedik Lanjut, FK UNPAD                                                                                                                                                     | Chrysanti Murad; Dwi Agustian; Fensi Amalia; Ida Parwati; Jessi Annisa; Lidya Chaidir; Nuni Haeruni; Nurul Setia Rahayu; Rita Herawati; Savira Ekawardhani; Shinta; Tri Hanggono Ahmad; Yanu; Yeni Rendieni; Yulia Sribudiani                                                                                                                                                                                                                                                                                              |
| EPI_ISL_4468049                                                                                                                                                                                                                                                                                                                                                                       | Laboratorium RSPAD Gatot Soebroto                                        | Genomik Solidaritas Indonesia Laboratorium                                                                                                                                                                    | Annisa Muthiah Sukirman; Anuraj Shankar; Ariel Pradipta; Carissa Sintca Wijaya; Dhahlia Agustina Cahyono; Dian Tri Wahyudi; Gracia Felias Enos Korompis; Himawan Masyhuri; Louisa Markus; Martina Lily Yana; Meutia Ayuputeri Kumaheri; Stefanus Bernard                                                                                                                                                                                                                                                                   |
| EPI_ISL_3548640,<br>EPI_ISL_3548689,<br>EPI_ISL_3548690,<br>EPI_ISL_3548691,<br>EPI_ISL_3548692                                                                                                                                                                                                                                                                                       | Laboratorium RSPP                                                        | Genomik Solidaritas Indonesia Laboratorium                                                                                                                                                                    | Annisa Muthiah Sukirman; Anuraj Shankar; Ariel Pradipta; Carissa Sintca Wijaya; Dhahlia Agustina Cahyono; Dwi Oktavia; Gracia Felias Enos Korompis; Louisa Markus; Meutia Ayuputeri Kumaheri; Neng Hilma Hamidah; Ngabila Salama; Tiranti Vindha; Vania Gavrla Wikasa; Wahyuningih                                                                                                                                                                                                                                         |
| EPI_ISL_4090575                                                                                                                                                                                                                                                                                                                                                                       | Laboratorium RSUD Poso                                                   | National Institute of Health Research and Development                                                                                                                                                         | Arie Ardiansyah Nugraha; Fajar Nur Sulistiyohadi; Hana Aparsi Pawestri; Hartanti Dian Ikawati; Kartika Dewi Puspa; Krisna Pangesti; Nelly Puspandari; Subangkit; Triyani Soekarso; Vivi Setiawaty                                                                                                                                                                                                                                                                                                                          |
| EPI_ISL_3086886, EPI_ISL_3086887, EPI_ISL_3086888, EPI_ISL_3086889, EPI_ISL_3086890, EPI_ISL_3086891, EPI_ISL_3086892, EPI_ISL_3086893, EPI_ISL_3086894, EPI_ISL_3086895, EPI_ISL_3086896                                                                                                                                                                                             | see above                                                                | Laboratorium Riset Unsoed                                                                                                                                                                                     | Indonesian Institute of Sciences (LIPI) and Laboratorium Riset Universitas Jenderal Soedirman<br>Anggia Prasetyoputri; Anik B. Dharmayanthi; Dhadhang W. Kurniawan; Dody Novrial; Endang S. Kusmintarsih; Erwin F. Hasrianda; Herjuno A. Nugroho; Idris; Indriawati; Isa Nuryana; Listiana Oktavia; M. M. Rudi Prihatno; M. Z. Syamsul Hidayat; Masrukhin; Norman A. Prayogi; Puspita Lisdianti; Ratih A. Ningrum; Ruby Setiawan; Sugiyono Saputra; Suprayogi; Syaiful Rizal; Syam B. Iryanto; Wahyu Siswandari; Yuliawati |
| EPI_ISL_4106136,<br>EPI_ISL_4106137,<br>EPI_ISL_4106138,<br>EPI_ISL_4106139                                                                                                                                                                                                                                                                                                           | Laboratorium Riset Unsoed                                                | National Research and Innovation Agency (BRIN-Indonesia, VenomCoV Project Team); Laboratorium Riset Unsoed                                                                                                    | Dhadhang W. Kurniawan; Dody Novrial; Endang S. Kusmintarsih; Idris; Indriawati; Isa Nuryana; M. M. Rudi Prihatno; M. Z. Syamsul Hidayat; Norman A. Prayogi; Puspita Lisdianti; Ratih A. Ningrum; Sugiyono Saputra; Suprayogi; Syaiful Rizal; Syam B. Iryanto; Wahyu Siswandari                                                                                                                                                                                                                                             |
| EPI_ISL_3466838, EPI_ISL_3466844, EPI_ISL_3466856, EPI_ISL_3466862, EPI_ISL_3466869, EPI_ISL_3466875, EPI_ISL_3466881, EPI_ISL_3466888, EPI_ISL_3466894, EPI_ISL_3466900, EPI_ISL_3466905, EPI_ISL_3466912, EPI_ISL_3466918, EPI_ISL_3466924, EPI_ISL_3466936, EPI_ISL_3466942, EPI_ISL_3466949, EPI_ISL_3466956, EPI_ISL_3550555, EPI_ISL_3550556, EPI_ISL_3550557, EPI_ISL_3550558, | see above                                                                | Laboratory of Clinical Microbiology, Faculty of Medicine, University of Indonesia                                                                                                                             | Eijkman Institute for Molecular Biology, National Research and Innovation Agency<br>Amin Soebandrio; Edison Johar; Frilasita A Yudhaputri; Hidayat Trimarsanto; Iskandar Adnan; Jessica R. Saragih; Khin Saw Myint; Lidwina Priliani; Lydia V. Panggalo; Muhammad Rezki Rasyak; Safarina G Malik; Sukma Oktavianthi; Willy Agustine                                                                                                                                                                                        |
| EPI_ISL_4056010                                                                                                                                                                                                                                                                                                                                                                       | Malang Health Office                                                     | Institute of Tropical Disease, Universitas Airlangga                                                                                                                                                          | Aldise M Nastri; Gatot Soegiarto; Jezzy R Dewantari; Kazufumi Shimizu; Kohar Hari Santoso; Krisnodo Rahardjo; Laksmi Wulandari; Maria I Lusida; Resti Yudhawati; Rima R Prasetya; Soetjipto; Yasuko Mori                                                                                                                                                                                                                                                                                                                   |
| EPI_ISL_1335888,<br>EPI_ISL_1335895                                                                                                                                                                                                                                                                                                                                                   | Martha Friska Multatuli Hospital Medan                                   | Faculty of Medicine, Universitas Sumatera Utara; Institute of Tropical Disease, Universitas Airlangga                                                                                                         | Aldise M Nastri; Franciscus Ginting; Inke N D Lubis; Irbah R Nainggolan; Jezzy R Dewantari; Kazufumi Shimizu; Krisnodo Rahardjo; Maria I Lusida; Meliani; Mirzan Hasibuan; Muhammad Ichwan; R Andika D Cahyadi; R Lia Kusumawati; Ramadhan Bestari; Rima R Prasetya; Soetjipto; Yasuko Mori                                                                                                                                                                                                                                |
| EPI_ISL_707692, EPI_ISL_707696, EPI_ISL_707778, EPI_ISL_707890, EPI_ISL_708652, EPI_ISL_882645, EPI_ISL_882646, EPI_ISL_882656, EPI_ISL_883957, EPI_ISL_933575, EPI_ISL_933576, EPI_ISL_1523640, EPI_ISL_1523641, EPI_ISL_1523642                                                                                                                                                     | see above                                                                | Medical Research Center, Faculty of Medicine, Syarif Hidayatullah State Islamic University Jakarta                                                                                                            | Medical Research Center, Faculty of Medicine, Syarif Hidayatullah State Islamic University Jakarta<br>Chris Adhiyanto; Dennis Nurjadi; Endah Wulandari; Erike A Suwarsono; Erike Suwarsono; Fermania Mela; Fika Ekayanti; Flori R Sari; Flori Ratna Sari; Hari Hendarto; Laifa Hendarmin; Rini Puspitaningrum; Zeti Harriyati                                                                                                                                                                                              |
| EPI_ISL_435281                                                                                                                                                                                                                                                                                                                                                                        | Medistra Hospital Jakarta                                                | Eijkman Institute for Molecular Biology, Ministry of Research and Technology/National Agency for Research and Innovation                                                                                      | Amin Soebandrio; David H Muljono; Edison Johar; Frilasita A Yudhaputri; Hidayat Trimarsanto; Khin Saw Myint; Safarina G Malik                                                                                                                                                                                                                                                                                                                                                                                              |
| EPI_ISL_1117592                                                                                                                                                                                                                                                                                                                                                                       | Melania Hospital, Bagor , West                                           | Biosafety Level-3 Laboratory, Indonesian Institute of Sciences (LIPI)                                                                                                                                         | Ade Andriani; Anik Budhi Dharmayanthi; Asep M. Ridwanuloh; Eko Wahyu Putro; Gita Syahputra; Hariyatun; Inswasti Cahyani; Matthew W. Loose; Mohammad Ilyas; Susanti; Syam Budi Iryanto; Wien Kusharyoto                                                                                                                                                                                                                                                                                                                     |



|                                                                                                                                                                                                                                                                                                                                                                                                                                                                                                                                                                                                                                                                                                                                                                                                                                                                                                                                                                                                                                                                                                                                                                                                                                                                                                                                                                                                                                                                                                                                                        |                                                   |                                                                                                                                                                                                                                                                                                                                                                                                                                                                                                                                                          |                                                                                                                                                                                                                                                                                                                                                                                                                                                 |
|--------------------------------------------------------------------------------------------------------------------------------------------------------------------------------------------------------------------------------------------------------------------------------------------------------------------------------------------------------------------------------------------------------------------------------------------------------------------------------------------------------------------------------------------------------------------------------------------------------------------------------------------------------------------------------------------------------------------------------------------------------------------------------------------------------------------------------------------------------------------------------------------------------------------------------------------------------------------------------------------------------------------------------------------------------------------------------------------------------------------------------------------------------------------------------------------------------------------------------------------------------------------------------------------------------------------------------------------------------------------------------------------------------------------------------------------------------------------------------------------------------------------------------------------------------|---------------------------------------------------|----------------------------------------------------------------------------------------------------------------------------------------------------------------------------------------------------------------------------------------------------------------------------------------------------------------------------------------------------------------------------------------------------------------------------------------------------------------------------------------------------------------------------------------------------------|-------------------------------------------------------------------------------------------------------------------------------------------------------------------------------------------------------------------------------------------------------------------------------------------------------------------------------------------------------------------------------------------------------------------------------------------------|
| see above                                                                                                                                                                                                                                                                                                                                                                                                                                                                                                                                                                                                                                                                                                                                                                                                                                                                                                                                                                                                                                                                                                                                                                                                                                                                                                                                                                                                                                                                                                                                              | PKM Abiansemal III, Bali                          | National Institute of Health Research and Development                                                                                                                                                                                                                                                                                                                                                                                                                                                                                                    | ; Arie Ardiansyah Nugraha; Fajar Nur Sulistiyohadi; Hana Apsari Pawestri; Hartanti Dian Ikawati; Kartika Dewi Puspa; Krisna Pangesti; Nelly Puspandari; Subangkit; Triyani Soekarso; Vivi Setiawaty                                                                                                                                                                                                                                             |
| EPI_ISL_3138839                                                                                                                                                                                                                                                                                                                                                                                                                                                                                                                                                                                                                                                                                                                                                                                                                                                                                                                                                                                                                                                                                                                                                                                                                                                                                                                                                                                                                                                                                                                                        | PKM Kec Kramat Jati                               | National Institute of Health Research and Development                                                                                                                                                                                                                                                                                                                                                                                                                                                                                                    | Arie Ardiansyah Nugraha; Fajar Nur Sulistiyohadi; Hana Apsari Pawestri; Hartanti Dian Ikawati; Kartika Dewi Puspa; Krisna Pangesti; Nelly Puspandari; Subangkit; Triyani Soekarso; Vivi Setiawaty                                                                                                                                                                                                                                               |
| EPI_ISL_3401891, EPI_ISL_3401892, EPI_ISL_3401894                                                                                                                                                                                                                                                                                                                                                                                                                                                                                                                                                                                                                                                                                                                                                                                                                                                                                                                                                                                                                                                                                                                                                                                                                                                                                                                                                                                                                                                                                                      | PKM Kelapa Gading                                 | Genomik Solidaritas Indonesia Laboratorium                                                                                                                                                                                                                                                                                                                                                                                                                                                                                                               | Annisa Muthiah Sukirman; Anuraj Shankar; Ariel Pradipta; Carissa Sintca Wijaya; Dhahlia Agustina Cahyono; Dwi Oktavia; Gracia Felias Enos Korompis; Himawan Masyhuri; Louisa Markus; Meutia Ayuputeri Kumaheri; Ngabila Salama; Tiranti Vindh; Vania Gavrila Wikasa                                                                                                                                                                             |
| EPI_ISL_2617466, EPI_ISL_2617467, EPI_ISL_2617468, EPI_ISL_2617469, EPI_ISL_2617470, EPI_ISL_2617471, EPI_ISL_2617472, EPI_ISL_2617473, EPI_ISL_2617474, EPI_ISL_2617475, EPI_ISL_2617476, EPI_ISL_2617477, EPI_ISL_2617478, EPI_ISL_2617479, EPI_ISL_2617480, EPI_ISL_2617481, EPI_ISL_2617482, EPI_ISL_2617483, EPI_ISL_2617484, EPI_ISL_2617485, EPI_ISL_2617486, EPI_ISL_2617487, EPI_ISL_2617488, EPI_ISL_2617489, EPI_ISL_2617490, EPI_ISL_2617491, EPI_ISL_2617492                                                                                                                                                                                                                                                                                                                                                                                                                                                                                                                                                                                                                                                                                                                                                                                                                                                                                                                                                                                                                                                                              |                                                   |                                                                                                                                                                                                                                                                                                                                                                                                                                                                                                                                                          |                                                                                                                                                                                                                                                                                                                                                                                                                                                 |
| see above                                                                                                                                                                                                                                                                                                                                                                                                                                                                                                                                                                                                                                                                                                                                                                                                                                                                                                                                                                                                                                                                                                                                                                                                                                                                                                                                                                                                                                                                                                                                              | PKM SINDANG BARANG BOGOR                          | National Institute of Health Research and Development                                                                                                                                                                                                                                                                                                                                                                                                                                                                                                    | Agustiningsih; Arie Ardiansyah Nugraha; Fauzul Muna; Hana Apsari Pawestri; Hartanti Dian Ikawati; Herna; Holy Arif Wibowo; Irene Lorinda Indalao; Kartika Dewi Puspa; Kindi Adam; Krisna Nur Andriana Pangesti; Natalie Laurencia Kipuw; Nelly Puspandari; Ni Ketut Susilarini; Nike Susanti; Nurika Hariastuti; Reni Herman; Rinin Ramadhany; Subangkit; Tati Febriyanti; Triyani Soekarso; Ulyi Alfi Nikmah; Vivi Setiawaty.; Yuni Rukminiati |
| EPI_ISL_1469258                                                                                                                                                                                                                                                                                                                                                                                                                                                                                                                                                                                                                                                                                                                                                                                                                                                                                                                                                                                                                                                                                                                                                                                                                                                                                                                                                                                                                                                                                                                                        | PKM TEMPURAN KARAWANG                             | National Institute of Health Research and Development                                                                                                                                                                                                                                                                                                                                                                                                                                                                                                    | Agustiningsih; Arie Ardiansyah Nugraha; Fauzul Muna; Hana Apsari Pawestri; Hartanti Dian Ikawati; Herna; Holy Arif Wibowo; Irene Lorinda Indalao; Kartika Dewi Puspa; Kindi Adam; Krisna Nur Andriana Pangesti; Natalie Laurencia Kipuw; Nelly Puspandari; Ni Ketut Susilarini; Nike Susanti; Nurika Hariastuti; Reni Herman; Rinin Ramadhany; Subangkit; Tati Febriyanti; Triyani Soekarso; Ulyi Alfi Nikmah; Vivi Setiawaty.; Yuni Rukminiati |
| EPI_ISL_3401893                                                                                                                                                                                                                                                                                                                                                                                                                                                                                                                                                                                                                                                                                                                                                                                                                                                                                                                                                                                                                                                                                                                                                                                                                                                                                                                                                                                                                                                                                                                                        | PKM Tanjung Priok                                 | Genomik Solidaritas Indonesia Laboratorium                                                                                                                                                                                                                                                                                                                                                                                                                                                                                                               | Annisa Muthiah Sukirman; Anuraj Shankar; Ariel Pradipta; Carissa Sintca Wijaya; Dhahlia Agustina Cahyono; Dwi Oktavia; Gracia Felias Enos Korompis; Himawan Masyhuri; Louisa Markus; Meutia Ayuputeri Kumaheri; Ngabila Salama; Tiranti Vindh; Vania Gavrila Wikasa; Wahyudi                                                                                                                                                                    |
| EPI_ISL_1824604, EPI_ISL_1915551, EPI_ISL_1915552, EPI_ISL_1915553                                                                                                                                                                                                                                                                                                                                                                                                                                                                                                                                                                                                                                                                                                                                                                                                                                                                                                                                                                                                                                                                                                                                                                                                                                                                                                                                                                                                                                                                                     | PRVKP FK UI                                       | National Institute of Health Research and Development                                                                                                                                                                                                                                                                                                                                                                                                                                                                                                    | Arie Ardiansyah Nugraha; Hana Apsari Pawestri; Hartanti Dian Ikawati; Kartika Dewi Puspa; Krisna Pangesti; Nelly Puspandari; Subangkit; Triyani Soekarso; Vivi Setiawaty                                                                                                                                                                                                                                                                        |
| EPI_ISL_4508324, EPI_ISL_4508325, EPI_ISL_4508326, EPI_ISL_4508327, EPI_ISL_4508328, EPI_ISL_4508329, EPI_ISL_4508330, EPI_ISL_4508331, EPI_ISL_4508332, EPI_ISL_4508333, EPI_ISL_4730555, EPI_ISL_4730556, EPI_ISL_4730557, EPI_ISL_4730558, EPI_ISL_4730559, EPI_ISL_4730560, EPI_ISL_4730561, EPI_ISL_4730562, EPI_ISL_4730563, EPI_ISL_5022836, EPI_ISL_5022837, EPI_ISL_5022838, EPI_ISL_5022839, EPI_ISL_5022840, EPI_ISL_5022841, EPI_ISL_5022842, EPI_ISL_5022843, EPI_ISL_5022844, EPI_ISL_5022852, EPI_ISL_5022853, EPI_ISL_5022854, EPI_ISL_5022855, EPI_ISL_5022856, EPI_ISL_5022857, EPI_ISL_5022957, EPI_ISL_5107846, EPI_ISL_5107847, EPI_ISL_5107848, EPI_ISL_5107849, EPI_ISL_5107850, EPI_ISL_5107851, EPI_ISL_5107852, EPI_ISL_5107853, EPI_ISL_5107854, EPI_ISL_5107855, EPI_ISL_5441736, EPI_ISL_5441737, EPI_ISL_5441738, EPI_ISL_5441739, EPI_ISL_5441740, EPI_ISL_5441741, EPI_ISL_5441742, EPI_ISL_5441743, EPI_ISL_5441748, EPI_ISL_5441749, EPI_ISL_5441750, EPI_ISL_5441773, EPI_ISL_5441774, EPI_ISL_5441775, EPI_ISL_5441776, EPI_ISL_5441777, EPI_ISL_5441778, EPI_ISL_5441779, EPI_ISL_5441780, EPI_ISL_5441781, EPI_ISL_5441782, EPI_ISL_5441783, EPI_ISL_5743645, EPI_ISL_5743662, EPI_ISL_5743672, EPI_ISL_5743681, EPI_ISL_5743686, EPI_ISL_5743716, EPI_ISL_5743725, EPI_ISL_5743726, EPI_ISL_5743736, EPI_ISL_5743737, EPI_ISL_5743742, EPI_ISL_5743743, EPI_ISL_5743744, EPI_ISL_5743751, EPI_ISL_5743752, EPI_ISL_5743760, EPI_ISL_5743761, EPI_ISL_5743769, EPI_ISL_5743770, EPI_ISL_5743771, EPI_ISL_5743776 |                                                   |                                                                                                                                                                                                                                                                                                                                                                                                                                                                                                                                                          |                                                                                                                                                                                                                                                                                                                                                                                                                                                 |
| see above                                                                                                                                                                                                                                                                                                                                                                                                                                                                                                                                                                                                                                                                                                                                                                                                                                                                                                                                                                                                                                                                                                                                                                                                                                                                                                                                                                                                                                                                                                                                              | PRVKP FKUI                                        | National Institute of Health Research and Development                                                                                                                                                                                                                                                                                                                                                                                                                                                                                                    | Arie Ardiansyah Nugraha; Fajar Nur Sulistiyohadi; Hana Apsari Pawestri; Hartanti Dian Ikawati; Kartika Dewi Puspa; Krisna Pangesti; Nelly Puspandari; Subangkit; Triyani Soekarso; Vivi Setiawaty                                                                                                                                                                                                                                               |
| EPI_ISL_5022916, EPI_ISL_5022917, EPI_ISL_5022918, EPI_ISL_5022919, EPI_ISL_5441744, EPI_ISL_5441745, EPI_ISL_5441746, EPI_ISL_5441747                                                                                                                                                                                                                                                                                                                                                                                                                                                                                                                                                                                                                                                                                                                                                                                                                                                                                                                                                                                                                                                                                                                                                                                                                                                                                                                                                                                                                 | PRVKP FKUI (Lab Hamera Sarana Indonesia)          | National Institute of Health Research and Development                                                                                                                                                                                                                                                                                                                                                                                                                                                                                                    | Arie Ardiansyah Nugraha; Fajar Nur Sulistiyohadi; Hana Apsari Pawestri; Hartanti Dian Ikawati; Kartika Dewi Puspa; Krisna Pangesti; Nelly Puspandari; Subangkit; Triyani Soekarso; Vivi Setiawaty                                                                                                                                                                                                                                               |
| EPI_ISL_3730787                                                                                                                                                                                                                                                                                                                                                                                                                                                                                                                                                                                                                                                                                                                                                                                                                                                                                                                                                                                                                                                                                                                                                                                                                                                                                                                                                                                                                                                                                                                                        | PT Kartika Bina Medikatama (Medika Plaza)         | Genomik Solidaritas Indonesia Laboratorium                                                                                                                                                                                                                                                                                                                                                                                                                                                                                                               | Anna Christina Brazia; Annisa Muthiah Sukirman; Anuraj Shankar; Ariel Pradipta; Dhahlia Agustina Cahyono; Dwi Oktavia; Gracia Felias Enos Korompis; Louisa Markus; Meutia Ayuputeri Kumaheri; Ngabila Salama; Rafikana Desi; Reinhart Gabriel; Tiranti Vindh; Vania Gavrila Wikasa                                                                                                                                                              |
| EPI_ISL_2987613, EPI_ISL_2987617, EPI_ISL_2987621, EPI_ISL_2987622, EPI_ISL_2987623, EPI_ISL_2987624                                                                                                                                                                                                                                                                                                                                                                                                                                                                                                                                                                                                                                                                                                                                                                                                                                                                                                                                                                                                                                                                                                                                                                                                                                                                                                                                                                                                                                                   | PUSKESMAS BOJONGSARI                              | National Institute of Health Research and Development                                                                                                                                                                                                                                                                                                                                                                                                                                                                                                    | Arie Ardiansyah Nugraha; Fajar Nur Sulistiyohadi; Hana Apsari Pawestri; Hartanti Dian Ikawati; Kartika Dewi Puspa; Krisna Pangesti; Nelly Puspandari; Subangkit; Triyani Soekarso; Vivi Setiawaty                                                                                                                                                                                                                                               |
| EPI_ISL_2337255                                                                                                                                                                                                                                                                                                                                                                                                                                                                                                                                                                                                                                                                                                                                                                                                                                                                                                                                                                                                                                                                                                                                                                                                                                                                                                                                                                                                                                                                                                                                        | PUSKESMAS JEPARA                                  | Genetics Working Group (Pokja Genetik) Faculty of Medicine, Public Health and Nursing Universitas Gadjah Mada (FK-KMK UGM); Disease Investigation Center Wates Ministry of Agriculture Indonesia; Department of Microbiology FK-KMK UGM; Laboratorium Diagnostik Yayasan Tahija World Mosquito Program (WMP) Yogyakarta Center for Tropical Medicine FK-KMK UGM; Integrated Research Center FK-KMK UGM; Department of Computer Science and Electronics FMIPA UGM; RSUP Dr. Sardjito                                                                      | Afiahayati; Alvina A Setiawan; Cita S Amalia; Dwi AA Nugrahaningsih; Edwin W. Daniwijaya; Eggi Arguni; Endah Supriyati; Gunadi; Hendra Wibawa; Kristy Iskandar; Ludhang P. Rizki; Marcellus; Mohamad S. Hakim; Nungki Anggorowati; Siswanto; Titik Nuryastuti; Tri Wibawa                                                                                                                                                                       |
| EPI_ISL_5200494, EPI_ISL_5200495, EPI_ISL_5200496, EPI_ISL_5200501                                                                                                                                                                                                                                                                                                                                                                                                                                                                                                                                                                                                                                                                                                                                                                                                                                                                                                                                                                                                                                                                                                                                                                                                                                                                                                                                                                                                                                                                                     | PUSKESMAS KECAMATAN CAKUNG                        | Genomik Solidaritas Indonesia Laboratorium                                                                                                                                                                                                                                                                                                                                                                                                                                                                                                               | Annisa Muthiah Sukirman; Anuraj Shankar; Ariel Pradipta; Carissa Sintca Wijaya; Gracia Felias Enos Korompis; Junaidah; Louisa Markus; Meutia Ayuputeri Kumaheri; Rahmaniwati Sulaiman; Reinhart Gabriel; Santi Rosamarlia; Stefanus Bernard; Vania Gavrila Wikasa                                                                                                                                                                               |
| EPI_ISL_3730786, EPI_ISL_3730798                                                                                                                                                                                                                                                                                                                                                                                                                                                                                                                                                                                                                                                                                                                                                                                                                                                                                                                                                                                                                                                                                                                                                                                                                                                                                                                                                                                                                                                                                                                       | PUSKESMAS KECAMATAN PANCORAN                      | Genomik Solidaritas Indonesia Laboratorium                                                                                                                                                                                                                                                                                                                                                                                                                                                                                                               | Aisyah Rachmadini; Anna Christina Brazia; Annisa Muthiah Sukirman; Anuraj Shankar; Ariel Pradipta; Dhahlia Agustina Cahyono; Dwi Oktavia; Gracia Felias Enos Korompis; Louisa Markus; Meutia Ayuputeri Kumaheri; Ngabila Salama; Reinhart Gabriel; Tiranti Vindh; Vania Gavrila Wikasa                                                                                                                                                          |
| EPI_ISL_3541163, EPI_ISL_3541164                                                                                                                                                                                                                                                                                                                                                                                                                                                                                                                                                                                                                                                                                                                                                                                                                                                                                                                                                                                                                                                                                                                                                                                                                                                                                                                                                                                                                                                                                                                       | PUSKESMAS KECAMATAN PASAR MINGGU                  | National Institute of Health Research and Development                                                                                                                                                                                                                                                                                                                                                                                                                                                                                                    | Arie Ardiansyah Nugraha; Fajar Nur Sulistiyohadi; Hana Apsari Pawestri; Hartanti Dian Ikawati; Kartika Dewi Puspa; Krisna Pangesti; Nelly Puspandari; Subangkit; Triyani Soekarso; Vivi Setiawaty                                                                                                                                                                                                                                               |
| EPI_ISL_2987612, EPI_ISL_2987620                                                                                                                                                                                                                                                                                                                                                                                                                                                                                                                                                                                                                                                                                                                                                                                                                                                                                                                                                                                                                                                                                                                                                                                                                                                                                                                                                                                                                                                                                                                       | PUSKESMAS SINDANG BARANG                          | National Institute of Health Research and Development                                                                                                                                                                                                                                                                                                                                                                                                                                                                                                    | Arie Ardiansyah Nugraha; Fajar Nur Sulistiyohadi; Hana Apsari Pawestri; Hartanti Dian Ikawati; Kartika Dewi Puspa; Krisna Pangesti; Nelly Puspandari; Subangkit; Triyani Soekarso; Vivi Setiawaty                                                                                                                                                                                                                                               |
| EPI_ISL_2987614                                                                                                                                                                                                                                                                                                                                                                                                                                                                                                                                                                                                                                                                                                                                                                                                                                                                                                                                                                                                                                                                                                                                                                                                                                                                                                                                                                                                                                                                                                                                        | PUSKESMAS TANA SEREAL                             | National Institute of Health Research and Development                                                                                                                                                                                                                                                                                                                                                                                                                                                                                                    | Arie Ardiansyah Nugraha; Fajar Nur Sulistiyohadi; Hana Apsari Pawestri; Hartanti Dian Ikawati; Kartika Dewi Puspa; Krisna Pangesti; Nelly Puspandari; Subangkit; Triyani Soekarso; Vivi Setiawaty                                                                                                                                                                                                                                               |
| EPI_ISL_2987616                                                                                                                                                                                                                                                                                                                                                                                                                                                                                                                                                                                                                                                                                                                                                                                                                                                                                                                                                                                                                                                                                                                                                                                                                                                                                                                                                                                                                                                                                                                                        | PUSKESMAS TANAH SEREAL BOGOR                      | National Institute of Health Research and Development                                                                                                                                                                                                                                                                                                                                                                                                                                                                                                    | Arie Ardiansyah Nugraha; Fajar Nur Sulistiyohadi; Hana Apsari Pawestri; Hartanti Dian Ikawati; Kartika Dewi Puspa; Krisna Pangesti; Nelly Puspandari; Subangkit; Triyani Soekarso; Vivi Setiawaty                                                                                                                                                                                                                                               |
| EPI_ISL_956277, EPI_ISL_956314, EPI_ISL_1159388, EPI_ISL_1165075, EPI_ISL_1789202                                                                                                                                                                                                                                                                                                                                                                                                                                                                                                                                                                                                                                                                                                                                                                                                                                                                                                                                                                                                                                                                                                                                                                                                                                                                                                                                                                                                                                                                      | Paru Hospital                                     | Institute of Tropical Disease, Universitas Airlangga                                                                                                                                                                                                                                                                                                                                                                                                                                                                                                     | Aldise M Nastri; Dyah Retno; Gatot Soegiarto; Jezzy R Dewantari; Kazufumi Shimizu; Krisnoadi Rahardjo; Laksmi Wulandari; Maria I Lusida; Resti Yudhawati; Rima R Prasetya; Soetjipto; Yasuko Mori                                                                                                                                                                                                                                               |
| EPI_ISL_5328537                                                                                                                                                                                                                                                                                                                                                                                                                                                                                                                                                                                                                                                                                                                                                                                                                                                                                                                                                                                                                                                                                                                                                                                                                                                                                                                                                                                                                                                                                                                                        | Pelabuhan Ratu Sukabumi Regional Hospital         | West Java Health Laboratory; School of Life Sciences and Technology, Institut Teknologi Bandung                                                                                                                                                                                                                                                                                                                                                                                                                                                          | Azzania Fibriani; Cut Nur Cinthia Alamanda; Ema Rahmawati; Karimatu Khoirunnisa; Miftahul Faridi; Rifky Waluyajati Rachman; Rini Robiani; Ryan Bayusantika Ristandi                                                                                                                                                                                                                                                                             |
| EPI_ISL_4885264, EPI_ISL_4885265                                                                                                                                                                                                                                                                                                                                                                                                                                                                                                                                                                                                                                                                                                                                                                                                                                                                                                                                                                                                                                                                                                                                                                                                                                                                                                                                                                                                                                                                                                                       | Pelabuhan Ratu Sukabumi Regional Public Hospital  | West Java Health Laboratory; School of Life Sciences and Technology, Institut Teknologi Bandung                                                                                                                                                                                                                                                                                                                                                                                                                                                          | Azzania Fibriani; Cut Nur Cinthia Alamanda; Ema Rahmawati; Isak Solihin; Karimatu Khoirunnisa; Miftahul Faridi; Rifky Waluyajati Rachman; Rini Robiani; Ryan Bayusantika Ristandi                                                                                                                                                                                                                                                               |
| EPI_ISL_5616413                                                                                                                                                                                                                                                                                                                                                                                                                                                                                                                                                                                                                                                                                                                                                                                                                                                                                                                                                                                                                                                                                                                                                                                                                                                                                                                                                                                                                                                                                                                                        | Politeknik Kesehatan Kemenkes Semarang            | Balai Laboratorium Kesehatan dan Pengujian Alat Kesehatan Provinsi Jawa Tengah                                                                                                                                                                                                                                                                                                                                                                                                                                                                           | Alia Wijayanti; Dwi Nursetyaaasih; Dyah Ayu; Endah Wahyu Y; Ismi Farhati; Purnomo; Sekti Handayani; Wiwik Peni; Yekti Hediningsih                                                                                                                                                                                                                                                                                                               |
| EPI_ISL_759959                                                                                                                                                                                                                                                                                                                                                                                                                                                                                                                                                                                                                                                                                                                                                                                                                                                                                                                                                                                                                                                                                                                                                                                                                                                                                                                                                                                                                                                                                                                                         | Premier Hospital Surabaya                         | Institute of Tropical Disease, Universitas Airlangga                                                                                                                                                                                                                                                                                                                                                                                                                                                                                                     | Aldise M Nastri; Gatot Soegiarto; Hartono Tanto; Jezzy R Dewantari; Kazufumi Shimizu; Krisnoadi Rahardjo; Laksmi Wulandari; Maria I Lusida; Resti Yudhawati; Rima R Prasetya; Soetjipto; Yasuko Mori                                                                                                                                                                                                                                            |
| EPI_ISL_759955, EPI_ISL_877423, EPI_ISL_877456, EPI_ISL_877457, EPI_ISL_956307, EPI_ISL_2284868, EPI_ISL_2284882, EPI_ISL_4056014                                                                                                                                                                                                                                                                                                                                                                                                                                                                                                                                                                                                                                                                                                                                                                                                                                                                                                                                                                                                                                                                                                                                                                                                                                                                                                                                                                                                                      | Primasatya Husada Citra Hospital                  | Institute of Tropical Disease, Universitas Airlangga                                                                                                                                                                                                                                                                                                                                                                                                                                                                                                     | Aldise M Nastri; Gatot Soegiarto; Jezzy R Dewantari; Kazufumi Shimizu; Kohar Hari Santoso; Krisnoadi Rahardjo; Laksmi Wulandari; Maria I Lusida; Pudji Djanuartono; Resti Yudhawati; Rima R Prasetya; Soetjipto; Yasuko Mori                                                                                                                                                                                                                    |
| see above                                                                                                                                                                                                                                                                                                                                                                                                                                                                                                                                                                                                                                                                                                                                                                                                                                                                                                                                                                                                                                                                                                                                                                                                                                                                                                                                                                                                                                                                                                                                              |                                                   |                                                                                                                                                                                                                                                                                                                                                                                                                                                                                                                                                          |                                                                                                                                                                                                                                                                                                                                                                                                                                                 |
| EPI_ISL_1020179, EPI_ISL_1020181, EPI_ISL_1020191, EPI_ISL_2840868                                                                                                                                                                                                                                                                                                                                                                                                                                                                                                                                                                                                                                                                                                                                                                                                                                                                                                                                                                                                                                                                                                                                                                                                                                                                                                                                                                                                                                                                                     | Primera Clinica, Jakarta                          | Biosafety Level-3 Laboratory, Indonesian Institute of Sciences (LIPI)                                                                                                                                                                                                                                                                                                                                                                                                                                                                                    | Andri Wardiana; Anggia Prasetyoputri; Anik B. Dharmayanthi; Ari S. Wulandari; Erwin F. Hasrianda; Fahrurrozi; Herjuno A. Nugroho; Indriawati; Isa Nuryana; Nova D. Yanthi; Ratih Asmana Ningrum; Sugiyono Saputra; Syaiful Rizal; Syam B. Iryanto; Syam Budi Iryanto                                                                                                                                                                            |
| EPI_ISL_2631478, EPI_ISL_2631479, EPI_ISL_2631480                                                                                                                                                                                                                                                                                                                                                                                                                                                                                                                                                                                                                                                                                                                                                                                                                                                                                                                                                                                                                                                                                                                                                                                                                                                                                                                                                                                                                                                                                                      | Prodia Karawang                                   | Indonesian Institute of Sciences (LIPI)/National Agency of Research and Innovation (BRIN) and National Institute of Health Research and Development (NIHRD)                                                                                                                                                                                                                                                                                                                                                                                              | Alfi T. Fathurahman; Andri Wardiana; Anik B. Dharmayanthi; Asep M. Ridwanulloh; Erwin F. Hasrianda; Hariyatan; Ratih A. Ningrum; Ruby Setiawan; Subangkit; Sugiyono Saputra; Syam B. Iryanto; Vivi Setiawaty; Yayuk Sri Rahayu                                                                                                                                                                                                                  |
| EPI_ISL_538513                                                                                                                                                                                                                                                                                                                                                                                                                                                                                                                                                                                                                                                                                                                                                                                                                                                                                                                                                                                                                                                                                                                                                                                                                                                                                                                                                                                                                                                                                                                                         | Provincial Health Laboratory Bekasi West Java     | National Institute of Health Research and Development                                                                                                                                                                                                                                                                                                                                                                                                                                                                                                    | AA; HA; HD; Ikawati; KD; KNA; Nugraha; Paisal; Pangesti; Pawestri; Puspa; Setiawaty, V.; Soekarso; Subangkit; T                                                                                                                                                                                                                                                                                                                                 |
| EPI_ISL_1398936                                                                                                                                                                                                                                                                                                                                                                                                                                                                                                                                                                                                                                                                                                                                                                                                                                                                                                                                                                                                                                                                                                                                                                                                                                                                                                                                                                                                                                                                                                                                        | Purwakarta Public Health                          | West Java Health Laboratory                                                                                                                                                                                                                                                                                                                                                                                                                                                                                                                              | Azzania Fibriani; Cut Nur Cinthia Alamanda; Ema Rahmawati; Isak Solihin; Kamila Tania; Karimatu Khoirunnisa; Miftahul Faridi; Rifky Waluyajati Rachman; Rini Robiani; Ryan Bayusantika Ristandi                                                                                                                                                                                                                                                 |
| EPI_ISL_1634467                                                                                                                                                                                                                                                                                                                                                                                                                                                                                                                                                                                                                                                                                                                                                                                                                                                                                                                                                                                                                                                                                                                                                                                                                                                                                                                                                                                                                                                                                                                                        | Purwakarta Public Health                          | West Java Health Laboratory; School of Life Sciences and Technology, Institut Teknologi Bandung                                                                                                                                                                                                                                                                                                                                                                                                                                                          | Aulia Saraswati Wicaksono; Azzania Fibriani; Cut Nur Cinthia Alamanda; Ema Rahmawati; Karimatu Khoirunnisa; Miftahul Faridi; Rifky Waluyajati Rachman; Rini Robiani; Ryan Bayusantika Ristandi                                                                                                                                                                                                                                                  |
| EPI_ISL_437189                                                                                                                                                                                                                                                                                                                                                                                                                                                                                                                                                                                                                                                                                                                                                                                                                                                                                                                                                                                                                                                                                                                                                                                                                                                                                                                                                                                                                                                                                                                                         | Pusat Pertamina Hospital                          | Eijkman Institute for Molecular Biology, Ministry of Research and Technology/National Agency for Research and Innovation                                                                                                                                                                                                                                                                                                                                                                                                                                 | Amin Soebandrio; David H Muljono; Edison Johar; Frilasita A Yudhaputri; Hidayat Trimarsanto; Khin Saw Myint; Safarina G Malik                                                                                                                                                                                                                                                                                                                   |
| EPI_ISL_3030049                                                                                                                                                                                                                                                                                                                                                                                                                                                                                                                                                                                                                                                                                                                                                                                                                                                                                                                                                                                                                                                                                                                                                                                                                                                                                                                                                                                                                                                                                                                                        | Puskesmas Arcamanik, Dinas Kesehatan Kota Bandung | Eijkman Institute for Molecular Biology, National Research and Innovation Agency; West Java Health Laboratory                                                                                                                                                                                                                                                                                                                                                                                                                                            | Amin Soebandrio; Azzania Fibriani; Cut Nur Cinthia Alamanda; Edison Johar; Ema Rahmawati; Frilasita A Yudhaputri; Hidayat Trimarsanto; Husna Nugrahapraja; Iskandar Adnan; Khin Saw Myint; Lidwina Priliani; Lydia V. Panggalo; Muhammad Rezki Rasyak; Rifky Waluyajati Rachman; Ryan Bayusantika Ristandi; Safarina G Malik; Sheila Widia Trisakti; Sukma Oktavianthi; Tati Sutarti Sastrowijoto; Usman Abdul Jabar; Willy Agustine            |
| EPI_ISL_2918646, EPI_ISL_2918647, EPI_ISL_2918648, EPI_ISL_2918649                                                                                                                                                                                                                                                                                                                                                                                                                                                                                                                                                                                                                                                                                                                                                                                                                                                                                                                                                                                                                                                                                                                                                                                                                                                                                                                                                                                                                                                                                     | Puskesmas Baleendah                               | Eijkman Institute for Molecular Biology, National Research and Innovation Agency; West Java Health Laboratory                                                                                                                                                                                                                                                                                                                                                                                                                                            | Amin Soebandrio; Azzania Fibriani; Cut Nur Cinthia Alamanda; Edison Johar; Ema Rahmawati; Frilasita A Yudhaputri; Hidayat Trimarsanto; Iskandar Adnan; Khin Saw Myint; Lidwina Priliani; Lydia V. Panggalo; Muhammad Rezki Rasyak; Rifky Waluyajati Rachman; Ryan Bayusantika Ristandi; Safarina G Malik; Sukma Oktavianthi; Willy Agustine                                                                                                     |
| EPI_ISL_2918639                                                                                                                                                                                                                                                                                                                                                                                                                                                                                                                                                                                                                                                                                                                                                                                                                                                                                                                                                                                                                                                                                                                                                                                                                                                                                                                                                                                                                                                                                                                                        | Puskesmas Banjaran Kota                           | Eijkman Institute for Molecular Biology, National Research and Innovation Agency; West Java Health Laboratory                                                                                                                                                                                                                                                                                                                                                                                                                                            | Amin Soebandrio; Azzania Fibriani; Cut Nur Cinthia Alamanda; Edison Johar; Ema Rahmawati; Frilasita A Yudhaputri; Hidayat Trimarsanto; Iskandar Adnan; Khin Saw Myint; Lidwina Priliani; Lydia V. Panggalo; Muhammad Rezki Rasyak; Rifky Waluyajati Rachman; Ryan Bayusantika Ristandi; Safarina G Malik; Sukma Oktavianthi; Willy Agustine                                                                                                     |
| EPI_ISL_610155                                                                                                                                                                                                                                                                                                                                                                                                                                                                                                                                                                                                                                                                                                                                                                                                                                                                                                                                                                                                                                                                                                                                                                                                                                                                                                                                                                                                                                                                                                                                         | Puskesmas Cangkre                                 | Genetics Working Group (Pokja Genetik) Faculty of Medicine, Public Health and Nursing Universitas Gadjah Mada (FK-KMK UGM); Disease Investigation Center Wates Ministry of Agriculture Indonesia; Department of Microbiology FK-KMK UGM; Laboratorium Diagnostik Yayasan Tahija World Mosquito Program (WMP) Yogyakarta Center for Tropical Medicine FK-KMK UGM; Integrated Research Center FK-KMK UGM; Department of Computer Science and Electronics FMIPA UGM; Balai Besar Teknik Kesehatan Lingkungan dan Pengendalian Penyakit (BBTKLPP) Yogyakarta | Afiahayati; Dwi AA Nugrahaningsih; Edwin W. Daniwijaya; Eggi Arguni; Endah Supriyati; Fadil Fahri; Gunadi; Havid Setyawan; Hendra Wibawa; Indaryati; Irene; Kristy Iskandar; Ludhang P. Rizki; Marcellus; Mohamad S. Hakim; Nawang Sukestningsih; Nungki Anggorowati; Rinin Enggy Yuliyanti; Siswanto; Titik Nuryastuti; Tri Wibawa                                                                                                             |
| EPI_ISL_3030044                                                                                                                                                                                                                                                                                                                                                                                                                                                                                                                                                                                                                                                                                                                                                                                                                                                                                                                                                                                                                                                                                                                                                                                                                                                                                                                                                                                                                                                                                                                                        | Puskesmas Ciawigebang                             | Eijkman Institute for Molecular Biology, National Research and Innovation Agency; West Java Health Laboratory                                                                                                                                                                                                                                                                                                                                                                                                                                            | Amin Soebandrio; Azzania Fibriani; Cut Nur Cinthia Alamanda; Edison Johar; Ema Rahmawati; Frilasita A Yudhaputri; Hidayat Trimarsanto; Iskandar Adnan; Khin Saw Myint; Lidwina Priliani; Lydia V. Panggalo; Muhammad Rezki                                                                                                                                                                                                                      |

|                                                                                                                                                                                                                                                                                                                                                    |                                                    |                                                                                                                                                                                                                                                                                                                                                                                                                                                                                     |                                                                                                                                                                                                                                                                                                                                                                                                                                                                                                                                                                         |
|----------------------------------------------------------------------------------------------------------------------------------------------------------------------------------------------------------------------------------------------------------------------------------------------------------------------------------------------------|----------------------------------------------------|-------------------------------------------------------------------------------------------------------------------------------------------------------------------------------------------------------------------------------------------------------------------------------------------------------------------------------------------------------------------------------------------------------------------------------------------------------------------------------------|-------------------------------------------------------------------------------------------------------------------------------------------------------------------------------------------------------------------------------------------------------------------------------------------------------------------------------------------------------------------------------------------------------------------------------------------------------------------------------------------------------------------------------------------------------------------------|
| EPI_ISL_2964681                                                                                                                                                                                                                                                                                                                                    | Puskesmas Colomadu 1 DKK Karanganyar               | Genetics Working Group (Pokja Genetik) Faculty of Medicine, Public Health and Nursing Universitas Gadjah Mada (FK-KMK UGM); Disease Investigation Center Wates Ministry of Agriculture Indonesia; Department of Microbiology FK-KMK UGM; Laboratorium Diagnostik Yayasan Tahija World Mosquito Program (WMP) Yogyakarta Center for Tropical Medicine FK-KMK UGM; Integrated Research Center FK-KMK UGM; Department of Computer Science and Electronics FMIPA UGM; RSUP Dr. Sardjito | Afiyahayati; Alvina A Setiawan; Dwi AA Nugrahaningsih; Dwi Indaryati; Edwin W. Daniwijaya; Eggi Arguni; Endah Supriyati; Gunadi; Hendra Wibawa; Indarto Sulistiyono; Khanza a Vujira; Kristy Iskandar; Ludhang P. Rizki; Marcellus; Mohamad S. Hakim; Nungki Anggorowati; Pramesti G Dewi; Siswanto; Titik Nuryastuti; Tri Wibawa                                                                                                                                                                                                                                       |
| EPI_ISL_4828221                                                                                                                                                                                                                                                                                                                                    | Puskesmas Doplang Blora                            | Balai Laboratorium Kesehatan Dan Pengujian Alat Kesehatan Provinsi Jawa Tengah                                                                                                                                                                                                                                                                                                                                                                                                      | Alia Wijayanti; Dwi Nursetyaasih; Dyah Ayu; Endah Wahyu Y; Ismi Farhati; Purnomo; Sekti Handayani; Wiwik Peni; Yekti Hediningsih                                                                                                                                                                                                                                                                                                                                                                                                                                        |
| EPI_ISL_4969122, EPI_ISL_4969127, EPI_ISL_4969136, see above                                                                                                                                                                                                                                                                                       | Puskesmas Galur I                                  | Genetics Working Group (Pokja Genetik) Faculty of Medicine, Public Health and Nursing Universitas Gadjah Mada (FK-KMK UGM); Disease Investigation Center Wates Ministry of Agriculture Indonesia; Department of Microbiology FK-KMK UGM; Laboratorium Diagnostik Yayasan Tahija World Mosquito Program (WMP) Yogyakarta Center for Tropical Medicine FK-KMK UGM; Integrated Research Center FK-KMK UGM; Department of Computer Science and Electronics FMIPA UGM; RSUP Dr. Sardjito | Afiyahayati; Alvina A Setiawan; Cita S Amalia; Dwi AA Nugrahaningsih; Dwi Indaryati; Dyah A Puspitarani; Edwin W. Daniwijaya; Eggi Arguni; Endah Supriyati; Gunadi; Hana F Hanifin; Hendra Wibawa; Indarto Sulistiyono; Irene Tania; Khanza a Vujira; Kristy Iskandar; Ludhang P. Rizki; Marcellus; Mohamad S. Hakim; Nungki Anggorowati; Pramesti G Dewi; Siswanto; Susan Simanjaya; Titik Nuryastuti; Tri Wibawa                                                                                                                                                      |
| EPI_ISL_4982801                                                                                                                                                                                                                                                                                                                                    | Puskesmas Grimulyo I                               | Genetics Working Group (Pokja Genetik) Faculty of Medicine, Public Health and Nursing Universitas Gadjah Mada (FK-KMK UGM); Disease Investigation Center Wates Ministry of Agriculture Indonesia; Department of Microbiology FK-KMK UGM; Laboratorium Diagnostik Yayasan Tahija World Mosquito Program (WMP) Yogyakarta Center for Tropical Medicine FK-KMK UGM; Integrated Research Center FK-KMK UGM; Department of Computer Science and Electronics FMIPA UGM; RSUP Dr. Sardjito | Afiyahayati; Dwi AA Nugrahaningsih; Dwi Indaryati; Edwin W. Daniwijaya; Eggi Arguni; Endah Supriyati; Gunadi; Hana F Hanifin; Hendra Wibawa; Indarto Sulistiyono; Irene Tania; Kristy Iskandar; Ludhang P. Rizki; Marcellus; Mohamad S. Hakim; Nungki Anggorowati; Pramesti G Dewi; Siswanto; Titik Nuryastuti; Tri Wibawa                                                                                                                                                                                                                                              |
| EPI_ISL_763066                                                                                                                                                                                                                                                                                                                                     | Puskesmas Grogol, Sukoharjo                        | Universitas Sebelas Maret (UNS); Rumah Sakit UNS (RS-UNS); National Institute of Health Research and Development, Indonesian Ministry of Health.                                                                                                                                                                                                                                                                                                                                    | Aff A Ghufron; Arie A Nugraha; Betty Suryawati; Dewi Puspa; Hana A Pawestri; Hartanti Dian Ika; Hartono; Kartika; Maryani; Revi G H Novika; Vivi Setiawaty.; Yulia Sari                                                                                                                                                                                                                                                                                                                                                                                                 |
| EPI_ISL_3030043                                                                                                                                                                                                                                                                                                                                    | Puskesmas Hantara                                  | Eijkman Institute for Molecular Biology, National Research and Innovation Agency; West Java Health Laboratory                                                                                                                                                                                                                                                                                                                                                                       | Amin Soebandrio; Azzania Fibriani; Cut Nur Cinthia Alamanda; Edison Johar; Ema Rahmawati; Filasita A Yudhaputri; Hidayat Trimarsanto; Iskandar Adnan; Khin Saw Myint; Lidwina Priliani; Lydia V. Panggalo; Muhammad Rezki Rasyak; Rifky Waluyajati Rachman; Ryan Bayusantika Ristandi; Safarina G Malik; Sukma Oktavianthi; Willy Agustine                                                                                                                                                                                                                              |
| EPI_ISL_763070                                                                                                                                                                                                                                                                                                                                     | Puskesmas Jambu Kulon, Klaten                      | Universitas Sebelas Maret (UNS); Rumah Sakit UNS (RS-UNS); National Institute of Health Research and Development, Indonesian Ministry of Health.                                                                                                                                                                                                                                                                                                                                    | Aff A Ghufron; Arie A Nugraha; Betty Suryawati.; Dewi Puspa; Hana A Pawestri; Hartanti Dian Ika; Hartono; Kartika; Maryani; Vivi Setiawaty; Yulia Sari                                                                                                                                                                                                                                                                                                                                                                                                                  |
| EPI_ISL_3030045, EPI_ISL_3030046, EPI_ISL_3030058                                                                                                                                                                                                                                                                                                  | Puskesmas Jatihandap, Dinas Kesehatan Kota Bandung | Eijkman Institute for Molecular Biology, National Research and Innovation Agency; West Java Health Laboratory                                                                                                                                                                                                                                                                                                                                                                       | Ade Fany Safftri; Amin Soebandrio; Azzania Fibriani; Cut Nur Cinthia Alamanda; Edison Johar; Ema Rahmawati; Filasita A Yudhaputri; Hidayat Trimarsanto; Husna Nugrahapraja; Iskandar Adnan; Khin Saw Myint; Lidwina Priliani; Lydia V. Panggalo; Muhammad Rezki Rasyak; Ranza Fadhill Pratama; Rifky Waluyajati Rachman; Ryan Bayusantika Ristandi; Safarina G Malik; Sukma Oktavianthi; Tati Sutarti Sastrowiyoto; Willy Agustine                                                                                                                                      |
| EPI_ISL_3030041                                                                                                                                                                                                                                                                                                                                    | Puskesmas Jelegong                                 | Eijkman Institute for Molecular Biology, National Research and Innovation Agency; West Java Health Laboratory                                                                                                                                                                                                                                                                                                                                                                       | Amin Soebandrio; Azzania Fibriani; Cut Nur Cinthia Alamanda; Edison Johar; Ema Rahmawati; Filasita A Yudhaputri; Hidayat Trimarsanto; Iskandar Adnan; Khin Saw Myint; Lidwina Priliani; Lydia V. Panggalo; Muhammad Rezki Rasyak; Rifky Waluyajati Rachman; Ryan Bayusantika Ristandi; Safarina G Malik; Sukma Oktavianthi; Willy Agustine                                                                                                                                                                                                                              |
| EPI_ISL_5010106                                                                                                                                                                                                                                                                                                                                    | Puskesmas Kalibawang                               | Genetics Working Group (Pokja Genetik) Faculty of Medicine, Public Health and Nursing Universitas Gadjah Mada (FK-KMK UGM); Disease Investigation Center Wates Ministry of Agriculture Indonesia; Department of Microbiology FK-KMK UGM; Laboratorium Diagnostik Yayasan Tahija World Mosquito Program (WMP) Yogyakarta Center for Tropical Medicine FK-KMK UGM; Integrated Research Center FK-KMK UGM; Department of Computer Science and Electronics FMIPA UGM; RSUP Dr. Sardjito | Afiyahayati; Alvina A Setiawan; Cita S Amalia; Dwi AA Nugrahaningsih; Dwi Indaryati; Edwin W. Daniwijaya; Eggi Arguni; Endah Supriyati; Gunadi; Hendra Wibawa; Indarto Sulistiyono; Kristy Iskandar; Ludhang P. Rizki; Marcellus; Mohamad S. Hakim; Nungki Anggorowati; Pramesti G Dewi; Siswanto; Titik Nuryastuti; Tri Wibawa                                                                                                                                                                                                                                         |
| EPI_ISL_4828937                                                                                                                                                                                                                                                                                                                                    | Puskesmas Karangrayung II – Kab Grobogan           | Balai Laboratorium Kesehatan Dan Pengujian Alat Kesehatan Provinsi Jawa Tengah                                                                                                                                                                                                                                                                                                                                                                                                      | Alia Wijayanti; Dwi Nursetyaasih; Dyah Ayu; Endah Wahyu Y; Ismi Farhati; Purnomo; Sekti Handayani; Wiwik Peni; Yekti Hediningsih                                                                                                                                                                                                                                                                                                                                                                                                                                        |
| EPI_ISL_3401900, EPI_ISL_3401901, EPI_ISL_3401902, EPI_ISL_3401903                                                                                                                                                                                                                                                                                 | Puskesmas Kecamatan Pandemangan                    | Genomik Solidaritas Indonesia Laboratorium                                                                                                                                                                                                                                                                                                                                                                                                                                          | Annisa Muthiah Sukirman; Anuraj Shankar; Ariel Pradipta; Carissa Sintca Wijaya; Dhahlia Agustina Cahyono; Dwi Oktavia; Gracia Felias Enos Korompis; Himawan Masyhuri; Louisa Markus; Meutia Ayuputeri Kumaheri; Ngabila Salama; Tiranti Vindha; Vania Gavrilva Wikasa                                                                                                                                                                                                                                                                                                   |
| EPI_ISL_3401855, EPI_ISL_3401879, EPI_ISL_3401880, EPI_ISL_3401881, EPI_ISL_3401882, EPI_ISL_3401883, EPI_ISL_3401884, EPI_ISL_3401885, EPI_ISL_3401886, EPI_ISL_3401887, EPI_ISL_3401888, EPI_ISL_3401889, EPI_ISL_3401890, EPI_ISL_3664305, EPI_ISL_3664306, EPI_ISL_3664307, EPI_ISL_3664308, EPI_ISL_3664309, EPI_ISL_3664310, EPI_ISL_3664311 | see above                                          | Genomik Solidaritas Indonesia Laboratorium                                                                                                                                                                                                                                                                                                                                                                                                                                          | Ahrahayati Wildany; Annisa Muthiah Sukirman; Anuraj Shankar; Ariel Pradipta; Carissa Sintca Wijaya; Dhahlia Agustina Cahyono; Dwi Oktavia; Gracia Felias Enos Korompis; Himawan Masyhuri; Louisa Markus; Meutia Ayuputeri Kumaheri; Ngabila Salama; Tiranti Vindha; Vania Gavrilva Wikasa                                                                                                                                                                                                                                                                               |
| EPI_ISL_2918640                                                                                                                                                                                                                                                                                                                                    | Puskesmas Kiangroke                                | Eijkman Institute for Molecular Biology, National Research and Innovation Agency; West Java Health Laboratory                                                                                                                                                                                                                                                                                                                                                                       | Amin Soebandrio; Azzania Fibriani; Cut Nur Cinthia Alamanda; Edison Johar; Ema Rahmawati; Filasita A Yudhaputri; Hidayat Trimarsanto; Iskandar Adnan; Khin Saw Myint; Lidwina Priliani; Lydia V. Panggalo; Muhammad Rezki Rasyak; Rifky Waluyajati Rachman; Ryan Bayusantika Ristandi; Safarina G Malik; Sukma Oktavianthi; Willy Agustine                                                                                                                                                                                                                              |
| EPI_ISL_4983057, EPI_ISL_5010024, EPI_ISL_5010104, EPI_ISL_5010355                                                                                                                                                                                                                                                                                 | Puskesmas Kopak II                                 | Genetics Working Group (Pokja Genetik) Faculty of Medicine, Public Health and Nursing Universitas Gadjah Mada (FK-KMK UGM); Disease Investigation Center Wates Ministry of Agriculture Indonesia; Department of Microbiology FK-KMK UGM; Laboratorium Diagnostik Yayasan Tahija World Mosquito Program (WMP) Yogyakarta Center for Tropical Medicine FK-KMK UGM; Integrated Research Center FK-KMK UGM; Department of Computer Science and Electronics FMIPA UGM; RSUP Dr. Sardjito | Afiyahayati; Alvina A Setiawan; Cita S Amalia; Dwi AA Nugrahaningsih; Dwi Indaryati; Dyah A Puspitarani; Edwin W. Daniwijaya; Eggi Arguni; Endah Supriyati; Gunadi; Hana F Hanifin; Hendra Wibawa; Indarto Sulistiyono; Irene Tania; Kristy Iskandar; Ludhang P. Rizki; Marcellus; Mohamad S. Hakim; Nungki Anggorowati; Pramesti G Dewi; Siswanto; Susan Simanjaya; Titik Nuryastuti; Tri Wibawa                                                                                                                                                                       |
| EPI_ISL_2918631                                                                                                                                                                                                                                                                                                                                    | Puskesmas Kramatmulya                              | Eijkman Institute for Molecular Biology, National Research and Innovation Agency; West Java Health Laboratory                                                                                                                                                                                                                                                                                                                                                                       | Amin Soebandrio; Azzania Fibriani; Cut Nur Cinthia Alamanda; Edison Johar; Ema Rahmawati; Filasita A Yudhaputri; Hidayat Trimarsanto; Iskandar Adnan; Khin Saw Myint; Lidwina Priliani; Lydia V. Panggalo; Muhammad Rezki Rasyak; Rifky Waluyajati Rachman; Ryan Bayusantika Ristandi; Safarina G Malik; Sukma Oktavianthi; Willy Agustine                                                                                                                                                                                                                              |
| EPI_ISL_5010073                                                                                                                                                                                                                                                                                                                                    | Puskesmas Lendah I                                 | Genetics Working Group (Pokja Genetik) Faculty of Medicine, Public Health and Nursing Universitas Gadjah Mada (FK-KMK UGM); Disease Investigation Center Wates Ministry of Agriculture Indonesia; Department of Microbiology FK-KMK UGM; Laboratorium Diagnostik Yayasan Tahija World Mosquito Program (WMP) Yogyakarta Center for Tropical Medicine FK-KMK UGM; Integrated Research Center FK-KMK UGM; Department of Computer Science and Electronics FMIPA UGM; RSUP Dr. Sardjito | Afiyahayati; Alvina A Setiawan; Cita S Amalia; Dwi AA Nugrahaningsih; Dwi Indaryati; Edwin W. Daniwijaya; Eggi Arguni; Endah Supriyati; Gunadi; Hendra Wibawa; Indarto Sulistiyono; Kristy Iskandar; Ludhang P. Rizki; Marcellus; Mohamad S. Hakim; Nungki Anggorowati; Pramesti G Dewi; Siswanto; Titik Nuryastuti; Tri Wibawa                                                                                                                                                                                                                                         |
| EPI_ISL_3030042                                                                                                                                                                                                                                                                                                                                    | Puskesmas Luragung                                 | Eijkman Institute for Molecular Biology, National Research and Innovation Agency; West Java Health Laboratory                                                                                                                                                                                                                                                                                                                                                                       | Amin Soebandrio; Azzania Fibriani; Cut Nur Cinthia Alamanda; Edison Johar; Ema Rahmawati; Filasita A Yudhaputri; Hidayat Trimarsanto; Iskandar Adnan; Khin Saw Myint; Lidwina Priliani; Lydia V. Panggalo; Muhammad Rezki Rasyak; Rifky Waluyajati Rachman; Ryan Bayusantika Ristandi; Safarina G Malik; Sukma Oktavianthi; Willy Agustine                                                                                                                                                                                                                              |
| EPI_ISL_2918632, EPI_ISL_2918636                                                                                                                                                                                                                                                                                                                   | Puskesmas Margajaya                                | Eijkman Institute for Molecular Biology, National Research and Innovation Agency; West Java Health Laboratory                                                                                                                                                                                                                                                                                                                                                                       | Amin Soebandrio; Azzania Fibriani; Cut Nur Cinthia Alamanda; Edison Johar; Ema Rahmawati; Filasita A Yudhaputri; Hidayat Trimarsanto; Iskandar Adnan; Khin Saw Myint; Lidwina Priliani; Lydia V. Panggalo; Muhammad Rezki Rasyak; Rifky Waluyajati Rachman; Ryan Bayusantika Ristandi; Safarina G Malik; Sukma Oktavianthi; Willy Agustine                                                                                                                                                                                                                              |
| EPI_ISL_632936                                                                                                                                                                                                                                                                                                                                     | Puskesmas Mlati 1 Sleman                           | Genetics Working Group (Pokja Genetik) Faculty of Medicine, Public Health and Nursing Universitas Gadjah Mada (FK-KMK UGM); Disease Investigation Center Wates Ministry of Agriculture Indonesia; Department of Microbiology FK-KMK UGM; Laboratorium Diagnostik Yayasan Tahija World Mosquito Program (WMP) Yogyakarta Center for Tropical Medicine FK-KMK UGM; Integrated Research Center FK-KMK UGM; Department of Computer Science and Electronics FMIPA UGM; RSUP Dr. Sardjito | Afiyahayati; Bambang Sigit Riyanto; Dwi AA Nugrahaningsih; Edwin W. Daniwijaya; Eggi Arguni; Eko Budiono; Endah Supriyati; Ernawati; Gunadi; Hendra Wibawa; Heni Retnowulan; Ika Trisnawati; Ira Puspitawati; Kristy Iskandar; Ludhang P. Rizki; Marcellus; Mohamad S. Hakim; Munawar Gani; Nungki Anggorowati; Nur Imma Fatimah Harahap; Nur Rahmi Ananda; Osman Sianipar; Riat El Khair; Satria Maulana; Siswanto; Sumardi; Titik Nuryastuti; Tri Wibawa; Umi Solekhah Intansari; Untung Wirawan; William Widitjiarsjo; Yunka Puspadewi; Elizabeth Henny Herringtiyas |
| EPI_ISL_5010492                                                                                                                                                                                                                                                                                                                                    | Puskesmas PLERET                                   | Genetics Working Group (Pokja Genetik) Faculty of Medicine, Public Health and Nursing Universitas Gadjah Mada (FK-KMK UGM); Disease Investigation Center Wates Ministry of Agriculture Indonesia; Department of Microbiology FK-KMK UGM; Laboratorium Diagnostik Yayasan Tahija World Mosquito Program (WMP) Yogyakarta Center for Tropical Medicine FK-KMK UGM; Integrated Research Center FK-KMK UGM; Department of Computer Science and Electronics FMIPA UGM; RSUP Dr. Sardjito | Afiyahayati; Alvina A Setiawan; Dwi AA Nugrahaningsih; Dwi Indaryati; Edwin W. Daniwijaya; Eggi Arguni; Endah Supriyati; Gunadi; Hendra Wibawa; Indarto Sulistiyono; Khanza a Vujira; Kristy Iskandar; Ludhang P. Rizki; Marcellus; Mohamad S. Hakim; Nungki Anggorowati; Pramesti G Dewi; Siswanto; Titik Nuryastuti; Tri Wibawa                                                                                                                                                                                                                                       |
| EPI_ISL_2918638, EPI_ISL_3030040                                                                                                                                                                                                                                                                                                                   | Puskesmas Pakutandang                              | Eijkman Institute for Molecular Biology, National Research and Innovation Agency; West Java Health Laboratory                                                                                                                                                                                                                                                                                                                                                                       | Amin Soebandrio; Azzania Fibriani; Cut Nur Cinthia Alamanda; Edison Johar; Ema Rahmawati; Filasita A Yudhaputri; Hidayat Trimarsanto; Iskandar Adnan; Khin Saw Myint; Lidwina Priliani; Lydia V. Panggalo; Muhammad Rezki Rasyak; Rifky Waluyajati Rachman; Ryan Bayusantika Ristandi; Safarina G Malik; Sukma Oktavianthi; Willy Agustine                                                                                                                                                                                                                              |
| EPI_ISL_766037                                                                                                                                                                                                                                                                                                                                     | Puskesmas Palmerah                                 | Eijkman Institute for Molecular Biology, Ministry of Research and Technology/National Agency for Research and Innovation                                                                                                                                                                                                                                                                                                                                                            | Amin Soebandrio; David H Muljono; Edison Johar; Filasita A Yudhaputri; Hidayat Trimarsanto; Khin Saw Myint; Safarina G Malik                                                                                                                                                                                                                                                                                                                                                                                                                                            |
| EPI_ISL_2918628                                                                                                                                                                                                                                                                                                                                    | Puskesmas Pameungpeuk                              | Eijkman Institute for Molecular Biology, National Research and Innovation Agency; West Java Health Laboratory                                                                                                                                                                                                                                                                                                                                                                       | Amin Soebandrio; Azzania Fibriani; Cut Nur Cinthia Alamanda; Edison Johar; Ema Rahmawati; Filasita A Yudhaputri; Hidayat Trimarsanto; Iskandar Adnan; Khin Saw Myint; Lidwina Priliani; Lydia V. Panggalo; Muhammad Rezki Rasyak; Rifky Waluyajati Rachman; Ryan Bayusantika Ristandi; Safarina G Malik; Sukma Oktavianthi; Willy Agustine                                                                                                                                                                                                                              |
| EPI_ISL_2918630, EPI_ISL_2918637                                                                                                                                                                                                                                                                                                                   | Puskesmas Pangalengan                              | Eijkman Institute for Molecular Biology, National Research and Innovation Agency; West Java Health Laboratory                                                                                                                                                                                                                                                                                                                                                                       | Amin Soebandrio; Azzania Fibriani; Cut Nur Cinthia Alamanda; Edison Johar; Ema Rahmawati; Filasita A Yudhaputri; Hidayat Trimarsanto; Iskandar Adnan; Khin Saw Myint; Lidwina Priliani; Lydia V. Panggalo; Muhammad Rezki Rasyak; Rifky Waluyajati Rachman; Ryan Bayusantika Ristandi; Safarina G Malik; Sukma Oktavianthi; Willy Agustine                                                                                                                                                                                                                              |
| EPI_ISL_4980593                                                                                                                                                                                                                                                                                                                                    | Puskesmas Pengasih I                               | Genetics Working Group (Pokja Genetik) Faculty of Medicine, Public Health and Nursing Universitas Gadjah Mada (FK-KMK UGM); Disease Investigation Center Wates Ministry of Agriculture Indonesia; Department of Microbiology FK-KMK UGM; Laboratorium Diagnostik Yayasan Tahija World Mosquito Program (WMP) Yogyakarta Center for Tropical Medicine FK-KMK UGM; Integrated Research Center FK-KMK UGM; Department of Computer Science and Electronics FMIPA UGM; RSUP Dr. Sardjito | Afiyahayati; Alvina A Setiawan; Dwi AA Nugrahaningsih; Dwi Indaryati; Edwin W. Daniwijaya; Eggi Arguni; Endah Supriyati; Gunadi; Hendra Wibawa; Indarto Sulistiyono; Khanza a Vujira; Kristy Iskandar; Ludhang P. Rizki; Marcellus; Mohamad S. Hakim; Nungki Anggorowati; Pramesti G Dewi; Siswanto; Titik Nuryastuti; Tri Wibawa                                                                                                                                                                                                                                       |
| EPI_ISL_4980431, EPI_ISL_4983391                                                                                                                                                                                                                                                                                                                   | Puskesmas Pengasih II                              | Genetics Working Group (Pokja Genetik) Faculty of Medicine, Public Health and Nursing Universitas Gadjah Mada (FK-KMK UGM); Disease Investigation Center Wates Ministry of Agriculture Indonesia; Department of Microbiology FK-KMK UGM; Laboratorium Diagnostik Yayasan Tahija World Mosquito Program (WMP) Yogyakarta Center for Tropical Medicine FK-KMK UGM; Integrated Research Center FK-KMK UGM; Department of Computer Science and Electronics FMIPA UGM; RSUP Dr. Sardjito | Afiyahayati; Alvina A Setiawan; Cita S Amalia; Dwi AA Nugrahaningsih; Dwi Indaryati; Edwin W. Daniwijaya; Eggi Arguni; Endah Supriyati; Gunadi; Hendra Wibawa; Indarto Sulistiyono; Khanza a Vujira; Kristy Iskandar; Ludhang P. Rizki; Marcellus; Mohamad S. Hakim; Nungki Anggorowati; Pramesti G Dewi; Siswanto; Titik Nuryastuti; Tri Wibawa                                                                                                                                                                                                                        |
| EPI_ISL_5010416                                                                                                                                                                                                                                                                                                                                    | Puskesmas Pleret                                   | Genetics Working Group (Pokja Genetik) Faculty of Medicine, Public Health and Nursing Universitas Gadjah Mada (FK-KMK UGM); Disease Investigation Center Wates Ministry of Agriculture Indonesia; Department of Microbiology FK-KMK UGM; Laboratorium Diagnostik Yayasan Tahija World Mosquito Program (WMP) Yogyakarta Center for Tropical Medicine FK-KMK UGM; Integrated Research Center FK-KMK UGM; Department of Computer Science and Electronics FMIPA UGM; RSUP Dr. Sardjito | Afiyahayati; Dwi AA Nugrahaningsih; Dwi Indaryati; Dyah A Puspitarani; Edwin W. Daniwijaya; Eggi Arguni; Endah Supriyati; Gunadi; Hendra Wibawa; Indarto Sulistiyono; Kristy Iskandar; Ludhang P. Rizki; Marcellus; Mohamad S. Hakim; Nungki Anggorowati; Pramesti G Dewi; Siswanto; Susan Simanjaya; Titik Nuryastuti; Tri Wibawa                                                                                                                                                                                                                                      |
| EPI_ISL_2918635                                                                                                                                                                                                                                                                                                                                    | Puskesmas Rancakalong                              | Eijkman Institute for Molecular Biology, National Research and Innovation Agency; West Java Health Laboratory                                                                                                                                                                                                                                                                                                                                                                       | Amin Soebandrio; Azzania Fibriani; Cut Nur Cinthia Alamanda; Edison Johar; Ema Rahmawati; Filasita A Yudhaputri; Hidayat Trimarsanto; Iskandar Adnan; Khin Saw Myint; Lidwina Priliani; Lydia V. Panggalo; Muhammad Rezki Rasyak; Rifky Waluyajati Rachman; Ryan Bayusantika Ristandi; Safarina G Malik; Sukma Oktavianthi; Willy Agustine                                                                                                                                                                                                                              |

|                                                                                                                                                                          |                                                   |                                                                                                                                                                                                                                                                                                                                                                                                                                                                                     |                                                                                                                                                                                                                                                                                                                                                                                                                                     |
|--------------------------------------------------------------------------------------------------------------------------------------------------------------------------|---------------------------------------------------|-------------------------------------------------------------------------------------------------------------------------------------------------------------------------------------------------------------------------------------------------------------------------------------------------------------------------------------------------------------------------------------------------------------------------------------------------------------------------------------|-------------------------------------------------------------------------------------------------------------------------------------------------------------------------------------------------------------------------------------------------------------------------------------------------------------------------------------------------------------------------------------------------------------------------------------|
| EPI_ISL_2918641,<br>EPI_ISL_2918642,<br>EPI_ISL_2918643,<br>EPI_ISL_2918644,<br>EPI_ISL_2918645                                                                          | Puskesmas Rancamanyar                             | Eijkman Institute for Molecular Biology, National Research and Innovation Agency; West Java Health Laboratory                                                                                                                                                                                                                                                                                                                                                                       | Amin Soebandrio; Azzania Fibriani; Cut Nur Cinthia Alamanda; Edison Johar; Ema Rahmawati; Frilasita A Yudhaputri; Hidayat Trimarsanto; Iskandar Adnan; Khin Saw Myint; Lidwina Priliani; Lydia V. Panggalo; Muhammad Rezki Rasyak; Rifky Waluyajati Rachman; Ryan Bayusantika Ristandi; Safarina G Malik; Sukma Oktavianthi; Willy Agustine                                                                                         |
| EPI_ISL_5010063                                                                                                                                                          | Puskesmas Samigaluh I                             | Genetics Working Group (Pokja Genetik) Faculty of Medicine, Public Health and Nursing Universitas Gadjah Mada (FK-KMK UGM); Disease Investigation Center Wates Ministry of Agriculture Indonesia; Department of Microbiology FK-KMK UGM; Laboratorium Diagnostik Yayasan Tahija World Mosquito Program (WMP) Yogyakarta Center for Tropical Medicine FK-KMK UGM; Integrated Research Center FK-KMK UGM; Department of Computer Science and Electronics FMIPA UGM; RSUP Dr. Sardjito | Afiahayati; Dwi AA Nugrahaningsih; Dwi Indaryati; Dyah A Puspitarani; Edwin W. Daniwijaya; Eggi Arguni; Endah Supriyati; Gunadi; Hendra Wibawa; Indarto Sulistiyono; Kristy Iskandar; Ludhang P. Rizki; Marcellus; Mohamad S. Hakim; Nungki Anggorowati; Pramesti G Dewi; Siswanto; Susan Simanjaya; Titik Nuryastuti; Tri Wibawa                                                                                                   |
| EPI_ISL_2918629                                                                                                                                                          | Puskesmas Sangkanhurip                            | Eijkman Institute for Molecular Biology, National Research and Innovation Agency; West Java Health Laboratory                                                                                                                                                                                                                                                                                                                                                                       | Amin Soebandrio; Azzania Fibriani; Cut Nur Cinthia Alamanda; Edison Johar; Ema Rahmawati; Frilasita A Yudhaputri; Hidayat Trimarsanto; Iskandar Adnan; Khin Saw Myint; Lidwina Priliani; Lydia V. Panggalo; Muhammad Rezki Rasyak; Rifky Waluyajati Rachman; Ryan Bayusantika Ristandi; Safarina G Malik; Sukma Oktavianthi; Willy Agustine                                                                                         |
| EPI_ISL_3030053,<br>EPI_ISL_3030059                                                                                                                                      | Puskesmas Sarijadi, Dinas Kesehatan Kota Bandung  | Eijkman Institute for Molecular Biology, National Research and Innovation Agency; West Java Health Laboratory                                                                                                                                                                                                                                                                                                                                                                       | Ade Fany Safitri; Amin Soebandrio; Azzania Fibriani; Cut Nur Cinthia Alamanda; Edison Johar; Ema Rahmawati; Frilasita A Yudhaputri; Hidayat Trimarsanto; Iskandar Adnan; Khin Saw Myint; Lidwina Priliani; Lydia V. Panggalo; Muhammad Rezki Rasyak; Ranza Fadhill Pratama; Rifky Waluyajati Rachman; Ryan Bayusantika Ristandi; Safarina G Malik; Sukma Oktavianthi; Tati Sutarti Sastrowiyoto; Willy Agustine                     |
| EPI_ISL_2918627                                                                                                                                                          | Puskesmas Sugihmukti                              | Eijkman Institute for Molecular Biology, National Research and Innovation Agency; West Java Health Laboratory                                                                                                                                                                                                                                                                                                                                                                       | Amin Soebandrio; Azzania Fibriani; Cut Nur Cinthia Alamanda; Edison Johar; Ema Rahmawati; Frilasita A Yudhaputri; Hidayat Trimarsanto; Iskandar Adnan; Khin Saw Myint; Lidwina Priliani; Lydia V. Panggalo; Muhammad Rezki Rasyak; Rifky Waluyajati Rachman; Ryan Bayusantika Ristandi; Safarina G Malik; Sukma Oktavianthi; Willy Agustine                                                                                         |
| EPI_ISL_3030048                                                                                                                                                          | Puskesmas Sukawarna, Dinas Kesehatan Kota Bandung | Eijkman Institute for Molecular Biology, National Research and Innovation Agency; West Java Health Laboratory                                                                                                                                                                                                                                                                                                                                                                       | Ade Fany Safitri; Amin Soebandrio; Azzania Fibriani; Cut Nur Cinthia Alamanda; Edison Johar; Ema Rahmawati; Frilasita A Yudhaputri; Hidayat Trimarsanto; Husna Nugrahapraja; Iskandar Adnan; Khin Saw Myint; Lidwina Priliani; Lydia V. Panggalo; Muhammad Rezki Rasyak; Ranza Fadhill Pratama; Rifky Waluyajati Rachman; Ryan Bayusantika Ristandi; Safarina G Malik; Sukma Oktavianthi; Tati Sutarti Sastrowiyoto; Willy Agustine |
| EPI_ISL_574610                                                                                                                                                           | Puskesmas Tambora                                 | Eijkman Institute for Molecular Biology, Ministry of Research and Technology/National Agency for Research and Innovation                                                                                                                                                                                                                                                                                                                                                            | Amin Soebandrio; David H Muljono; Edison Johar; Frilasita A Yudhaputri; Herawati Sudoyo; Hidayat Trimarsanto; Iskandar A Adnan; Khin Saw Myint; Safarina G Malik; Willy Agustine                                                                                                                                                                                                                                                    |
| EPI_ISL_4969291                                                                                                                                                          | Puskesmas Temon 2                                 | Genetics Working Group (Pokja Genetik) Faculty of Medicine, Public Health and Nursing Universitas Gadjah Mada (FK-KMK UGM); Disease Investigation Center Wates Ministry of Agriculture Indonesia; Department of Microbiology FK-KMK UGM; Laboratorium Diagnostik Yayasan Tahija World Mosquito Program (WMP) Yogyakarta Center for Tropical Medicine FK-KMK UGM; Integrated Research Center FK-KMK UGM; Department of Computer Science and Electronics FMIPA UGM; RSUP Dr. Sardjito | Afiahayati; Alvina A Setiawan; Dwi AA Nugrahaningsih; Dwi Indaryati; Edwin W. Daniwijaya; Eggi Arguni; Endah Supriyati; Gunadi; Hendra Wibawa; Indarto Sulistiyono; Khanza a Vujira; Kristy Iskandar; Ludhang P. Rizki; Marcellus; Mohamad S. Hakim; Nungki Anggorowati; Pramesti G Dewi; Siswanto; Titik Nuryastuti; Tri Wibawa                                                                                                    |
| EPI_ISL_2854780                                                                                                                                                          | Puskesmas kec Menteng                             | National Institute of Health Research and Development                                                                                                                                                                                                                                                                                                                                                                                                                               | Arie Ardiansyah Nugraha; Hana Apsari Pawestri; Hartanti Dian Ikawati; Kartika Dewi Puspa; Krisna Pangesti; Nelly Puspandari; Subangkit; Triyani Soekarso; Vivi Setiawaty                                                                                                                                                                                                                                                            |
| EPI_ISL_4004699,<br>EPI_ISL_4004700,<br>EPI_ISL_4004702                                                                                                                  | QR Lab                                            | National Research and Innovation Agency (BRIN-Indonesia)                                                                                                                                                                                                                                                                                                                                                                                                                            | Ahmad Fathoni; Anggia Prasetyoputri; Anik B. Dharmayanthi; Asep M. Ridwanulloh; Hariyatun; Indriawati; Rifki Sadikin; Sugiyono Saputra; Suvia Widyaningrum; Syam B. Iryanto                                                                                                                                                                                                                                                         |
| EPI_ISL_518819,<br>EPI_ISL_1020206                                                                                                                                       | Qadr Hospital, Tangerang, Banten                  | Biosafety Level-3 Laboratory, Indonesian Institute of Sciences (LIPI)                                                                                                                                                                                                                                                                                                                                                                                                               | Ade Andriani; Ahmad Fathoni; Andri Wardiana; Anggia Prasetyoputri; Anik Budhi Dharmayanthi; Ari Sulistyo Wulandari; Ario Betha Juansilifero; Asep M Ridwanuloh; Eko Wahyu Putro; Gita Syahputra; Isa Nuryana; Puspita Lisdianti; Ratih Asmana Ningrum; Rifki Sadikin; Sri Swasthikawati; Sugiyono Saputra; Syam Budi Iryanto; Wlen Kusharyoto                                                                                       |
| EPI_ISL_2854775,<br>EPI_ISL_2931796,<br>EPI_ISL_2965759                                                                                                                  | RS Advent Bandar Lampung                          | National Institute of Health Research and Development                                                                                                                                                                                                                                                                                                                                                                                                                               | ; Arie Ardiansyah Nugraha; Fajar Nur Sulistiyohadi; Hana Apsari Pawestri; Hartanti Dian Ikawati; Kartika Dewi Puspa; Krisna Pangesti; Nelly Puspandari; Subangkit; Triyani Soekarso; Vivi Setiawaty                                                                                                                                                                                                                                 |
| EPI_ISL_2364593                                                                                                                                                          | RS An-Nisa Tangerang                              | Eijkman Institute for Molecular Biology, National Agency for Research and Innovation                                                                                                                                                                                                                                                                                                                                                                                                | Amin Soebandrio; Edison Johar; Frilasita A Yudhaputri; Hidayat Trimarsanto; Iskandar Adnan; Khin Saw Myint; Lidwina Priliani; Lydia V. Panggalo; Muhammad Rezki Rasyak; Safarina G Malik; Sukma Oktavianthi; Willy Agustine                                                                                                                                                                                                         |
| EPI_ISL_888980,<br>EPI_ISL_889015,<br>EPI_ISL_889022                                                                                                                     | RS Anna                                           | Eijkman Institute for Molecular Biology, Ministry of Research and Technology/National Agency for Research and Innovation                                                                                                                                                                                                                                                                                                                                                            | Amin Soebandrio; Edison Johar; Frilasita A Yudhaputri; Hidayat Trimarsanto; Iskandar Adnan; Khin Saw Myint; Lydia V. Panggalo; Safarina G Malik; Sukma Oktavianthi; Willy Agustine                                                                                                                                                                                                                                                  |
| EPI_ISL_1283960                                                                                                                                                          | RS Asy-Syifaa Leuwiliang                          | Eijkman Institute for Molecular Biology, Ministry of Research and Technology/National Agency for Research and Innovation                                                                                                                                                                                                                                                                                                                                                            | Amin Soebandrio; Edison Johar; Frilasita A Yudhaputri; Hidayat Trimarsanto; Iskandar Adnan; Khin Saw Myint; Lydia V. Panggalo; Safarina G Malik; Sukma Oktavianthi; Willy Agustine                                                                                                                                                                                                                                                  |
| EPI_ISL_2364578                                                                                                                                                          | RS Asy-Syifaa Leuwiliang                          | Eijkman Institute for Molecular Biology, National Agency for Research and Innovation                                                                                                                                                                                                                                                                                                                                                                                                | Amin Soebandrio; Edison Johar; Frilasita A Yudhaputri; Hidayat Trimarsanto; Iskandar Adnan; Khin Saw Myint; Lidwina Priliani; Lydia V. Panggalo; Muhammad Rezki Rasyak; Safarina G Malik; Sukma Oktavianthi; Willy Agustine                                                                                                                                                                                                         |
| EPI_ISL_3401867,<br>EPI_ISL_3401895,<br>EPI_ISL_3401898,<br>EPI_ISL_3401899                                                                                              | RS Atma Jaya                                      | Genomik Solidaritas Indonesia Laboratorium                                                                                                                                                                                                                                                                                                                                                                                                                                          | Annisa Muthiah Sukirman; Anuraj Shankar; Ariel Pradipta; Carissa Sintca Wijaya; Dhahila Agustina Cahyono; Dwi Oktavia; Gracia Felias Enos Korompis; Himawan Masyhuri; Louisa Markus; Meutia Ayuputeri Kumaheri; Ngabila Salama; Tiranti Vindha; Vania Gavrila Wikasa                                                                                                                                                                |
| EPI_ISL_3138851                                                                                                                                                          | RS Bali Jimbaran                                  | National Institute of Health Research and Development                                                                                                                                                                                                                                                                                                                                                                                                                               | Arie Ardiansyah Nugraha; Fajar Nur Sulistiyohadi; Hana Apsari Pawestri; Hartanti Dian Ikawati; Kartika Dewi Puspa; Krisna Pangesti; Nelly Puspandari; Subangkit; Triyani Soekarso; Vivi Setiawaty                                                                                                                                                                                                                                   |
| EPI_ISL_3138853,<br>EPI_ISL_3138854                                                                                                                                      | RS Balimed Karangasem                             | National Institute of Health Research and Development                                                                                                                                                                                                                                                                                                                                                                                                                               | ; Arie Ardiansyah Nugraha; Fajar Nur Sulistiyohadi; Hana Apsari Pawestri; Hartanti Dian Ikawati; Kartika Dewi Puspa; Krisna Pangesti; Nelly Puspandari; Subangkit; Triyani Soekarso; Vivi Setiawaty                                                                                                                                                                                                                                 |
| EPI_ISL_2631464,<br>EPI_ISL_2631465,<br>EPI_ISL_2631466,<br>EPI_ISL_2631467,<br>EPI_ISL_2631468                                                                          | RS Bayukarta                                      | Indonesian Institute of Sciences (LIPI)/National Agency of Research and Innovation (BRIN) and National Institute of Health Research and Development (NIHRD)                                                                                                                                                                                                                                                                                                                         | Anggia Prasetyoputri; Eko Wahyu Putro; Fahrurrozi; Herjuno A. Nugroho; Idris; Indriawati; Isa Nuryana; Linda Sukmarini; Listiana Oktavia; Nova D. Yanthi; Puspita Lisdianti; Sri Swasthikawati; Subangkit; Sugiyono Saputra; Syam B. Iryanto; Vivi Setiawaty; Yayuk Sri Rahayu; Yullawati                                                                                                                                           |
| EPI_ISL_1284044, EPI_ISL_1284048, EPI_ISL_1284201, see above                                                                                                             | RS Bhakti Husada Cikarang                         | Eijkman Institute for Molecular Biology, Ministry of Research and Technology/National Agency for Research and Innovation                                                                                                                                                                                                                                                                                                                                                            | Amin Soebandrio; Edison Johar; Frilasita A Yudhaputri; Hidayat Trimarsanto; Iskandar Adnan; Khin Saw Myint; Lydia V. Panggalo; Muhammad Rezki Rasyak; Safarina G Malik; Sukma Oktavianthi; Willy Agustine                                                                                                                                                                                                                           |
| EPI_ISL_2364573,<br>EPI_ISL_2364574,<br>EPI_ISL_2364590,<br>EPI_ISL_2364604,<br>EPI_ISL_2364629                                                                          | RS Bhakti Husada Cikarang                         | Eijkman Institute for Molecular Biology, National Agency for Research and Innovation                                                                                                                                                                                                                                                                                                                                                                                                | Amin Soebandrio; Edison Johar; Frilasita A Yudhaputri; Hidayat Trimarsanto; Iskandar Adnan; Khin Saw Myint; Lidwina Priliani; Lydia V. Panggalo; Muhammad Rezki Rasyak; Safarina G Malik; Sukma Oktavianthi; Willy Agustine                                                                                                                                                                                                         |
| EPI_ISL_2614708<br>EPI_ISL_888979,<br>EPI_ISL_1283991,<br>EPI_ISL_1284121,<br>EPI_ISL_1284125,<br>EPI_ISL_1622414                                                        | RS Bhakti Mulia                                   | Eijkman Institute for Molecular Biology, Ministry of Research and Technology/National Agency for Research and Innovation                                                                                                                                                                                                                                                                                                                                                            | Amin Soebandrio; Edison Johar; Frilasita A Yudhaputri; Hidayat Trimarsanto; Iskandar Adnan; Khin Saw Myint; Lydia V. Panggalo; Muhammad Rezki Rasyak; Safarina G Malik; Sukma Oktavianthi; Willy Agustine                                                                                                                                                                                                                           |
| EPI_ISL_2364595<br>EPI_ISL_2614652,<br>EPI_ISL_2614653,<br>EPI_ISL_2614654,<br>EPI_ISL_2614665,<br>EPI_ISL_2614704,<br>EPI_ISL_2614722                                   | RS Bhakti Mulia                                   | Eijkman Institute for Molecular Biology, National Agency for Research and Innovation                                                                                                                                                                                                                                                                                                                                                                                                | Amin Soebandrio; Edison Johar; Frilasita A Yudhaputri; Hidayat Trimarsanto; Iskandar Adnan; Khin Saw Myint; Lidwina Priliani; Lydia V. Panggalo; Muhammad Rezki Rasyak; Safarina G Malik; Sukma Oktavianthi; Willy Agustine                                                                                                                                                                                                         |
| EPI_ISL_2614652,<br>EPI_ISL_2614653,<br>EPI_ISL_2614654,<br>EPI_ISL_2614665,<br>EPI_ISL_2614704,<br>EPI_ISL_2614722                                                      | RS Bhakti Mulia                                   | Eijkman Institute for Molecular Biology, National Research and Innovation Agency                                                                                                                                                                                                                                                                                                                                                                                                    | Amin Soebandrio; Edison Johar; Frilasita A Yudhaputri; Hidayat Trimarsanto; Iskandar Adnan; Khin Saw Myint; Lidwina Priliani; Lydia V. Panggalo; Muhammad Rezki Rasyak; Safarina G Malik; Sukma Oktavianthi; Willy Agustine                                                                                                                                                                                                         |
| EPI_ISL_766035                                                                                                                                                           | RS Bhayangkara Brimob Kelapa Dua                  | Eijkman Institute for Molecular Biology, Ministry of Research and Technology/National Agency for Research and Innovation                                                                                                                                                                                                                                                                                                                                                            | Amin Soebandrio; David H Muljono; Edison Johar; Frilasita A Yudhaputri; Hidayat Trimarsanto; Khin Saw Myint; Safarina G Malik                                                                                                                                                                                                                                                                                                       |
| EPI_ISL_5022922,<br>EPI_ISL_5022923,<br>EPI_ISL_5022924,<br>EPI_ISL_5022925,<br>EPI_ISL_5022926                                                                          | RS Bhayangkara Jambi                              | National Institute of Health Research and Development                                                                                                                                                                                                                                                                                                                                                                                                                               | Arie Ardiansyah Nugraha; Fajar Nur Sulistiyohadi; Hana Apsari Pawestri; Hartanti Dian Ikawati; Kartika Dewi Puspa; Krisna Pangesti; Nelly Puspandari; Subangkit; Triyani Soekarso; Vivi Setiawaty                                                                                                                                                                                                                                   |
| EPI_ISL_4730608,<br>EPI_ISL_4730609,<br>EPI_ISL_4730610,<br>EPI_ISL_4730611,<br>EPI_ISL_4730612                                                                          | RS Bhayangkara TK II Makassar                     | National Institute of Health Research and Development                                                                                                                                                                                                                                                                                                                                                                                                                               | Arie Ardiansyah Nugraha; Fajar Nur Sulistiyohadi; Hana Apsari Pawestri; Hartanti Dian Ikawati; Kartika Dewi Puspa; Krisna Pangesti; Nelly Puspandari; Subangkit; Triyani Soekarso; Vivi Setiawaty                                                                                                                                                                                                                                   |
| EPI_ISL_5796066, EPI_ISL_5796067, EPI_ISL_5796068, EPI_ISL_5796069, EPI_ISL_5796070, EPI_ISL_5796071, EPI_ISL_5796072, EPI_ISL_5796073, EPI_ISL_5796074, EPI_ISL_5796075 | see above                                         | RS Bhayangkara TK III Banjarmasin                                                                                                                                                                                                                                                                                                                                                                                                                                                   | Arie Ardiansyah Nugraha; Fajar Nur Sulistiyohadi; Hana Apsari Pawestri; Hartanti Dian Ikawati; Kartika Dewi Puspa; Krisna Pangesti; Nelly Puspandari; Subangkit; Triyani Soekarso; Vivi Setiawaty                                                                                                                                                                                                                                   |
| EPI_ISL_766039,<br>EPI_ISL_766048                                                                                                                                        | RS Bhayangkara Tk. III                            | Eijkman Institute for Molecular Biology, Ministry of Research and Technology/National Agency for Research and Innovation                                                                                                                                                                                                                                                                                                                                                            | Amin Soebandrio; David H Muljono; Edison Johar; Frilasita A Yudhaputri; Hidayat Trimarsanto; Khin Saw Myint; Safarina G Malik                                                                                                                                                                                                                                                                                                       |
| EPI_ISL_1283967                                                                                                                                                          | RS Bina Husada Bogor                              | Eijkman Institute for Molecular Biology, Ministry of Research and Technology/National Agency for Research and Innovation                                                                                                                                                                                                                                                                                                                                                            | Amin Soebandrio; Edison Johar; Frilasita A Yudhaputri; Hidayat Trimarsanto; Iskandar Adnan; Khin Saw Myint; Lydia V. Panggalo; Safarina G Malik; Sukma Oktavianthi; Willy Agustine                                                                                                                                                                                                                                                  |
| EPI_ISL_947249,                                                                                                                                                          | RS Bina Husada Cibinong                           | Eijkman Institute for Molecular Biology, Ministry of Research and Technology/National Agency for Research and                                                                                                                                                                                                                                                                                                                                                                       | Amin Soebandrio; Edison Johar; Frilasita A Yudhaputri; Hidayat Trimarsanto; Iskandar Adnan; Khin Saw Myint; Lydia V. Panggalo; Safarina G Malik; Sukma Oktavianthi; Willy Agustine                                                                                                                                                                                                                                                  |

|                                                                                                                                                                                                                                                                                                                                                                                                                                                                                                                                                                                                                                                                                                                                                                                                                                                                                  |                                            |                                                                                                                                                                                                                                                                                                                                                                                                                                                                                     |                                                                                                                                                                                                                                                                                                                                                                                                                   |
|----------------------------------------------------------------------------------------------------------------------------------------------------------------------------------------------------------------------------------------------------------------------------------------------------------------------------------------------------------------------------------------------------------------------------------------------------------------------------------------------------------------------------------------------------------------------------------------------------------------------------------------------------------------------------------------------------------------------------------------------------------------------------------------------------------------------------------------------------------------------------------|--------------------------------------------|-------------------------------------------------------------------------------------------------------------------------------------------------------------------------------------------------------------------------------------------------------------------------------------------------------------------------------------------------------------------------------------------------------------------------------------------------------------------------------------|-------------------------------------------------------------------------------------------------------------------------------------------------------------------------------------------------------------------------------------------------------------------------------------------------------------------------------------------------------------------------------------------------------------------|
| EPI_ISL_947252, EPI_ISL_947257                                                                                                                                                                                                                                                                                                                                                                                                                                                                                                                                                                                                                                                                                                                                                                                                                                                   |                                            | Innovation                                                                                                                                                                                                                                                                                                                                                                                                                                                                          |                                                                                                                                                                                                                                                                                                                                                                                                                   |
| EPI_ISL_1284069, EPI_ISL_1284072, EPI_ISL_1622383                                                                                                                                                                                                                                                                                                                                                                                                                                                                                                                                                                                                                                                                                                                                                                                                                                | RS Bina Sehat Mandiri                      | Eijkman Institute for Molecular Biology, Ministry of Research and Technology/National Agency for Research and Innovation                                                                                                                                                                                                                                                                                                                                                            | Amin Soebandrio; Edison Johar; Frilasita A Yudhaputri; Hidayat Trimarsanto; Iskandar Adnan; Khin Saw Myint; Lydia V. Panggalo; Muhammad Rezki Rasyak; Safarina G Malik; Sukma Oktavianthi; Willy Agustine                                                                                                                                                                                                         |
| EPI_ISL_3070858                                                                                                                                                                                                                                                                                                                                                                                                                                                                                                                                                                                                                                                                                                                                                                                                                                                                  | RS Bogor Senior                            | Eijkman Institute for Molecular Biology, National Research and Innovation Agency                                                                                                                                                                                                                                                                                                                                                                                                    | Amin Soebandrio; Edison Johar; Frilasita A Yudhaputri; Hidayat Trimarsanto; Iskandar Adnan; Khin Saw Myint; Lidwina Priliani; Lydia V. Panggalo; Muhammad Rezki Rasyak; Safarina G Malik; Sukma Oktavianthi; Willy Agustine                                                                                                                                                                                       |
| EPI_ISL_1915577                                                                                                                                                                                                                                                                                                                                                                                                                                                                                                                                                                                                                                                                                                                                                                                                                                                                  | RS Bunda                                   | National Institute of Health Research and Development                                                                                                                                                                                                                                                                                                                                                                                                                               | Arie Ardiansyah Nugraha; Hana Apsari Pawestri; Hartanti Dian Ikawati; Kartika Dewi Puspa; Krisna Pangesti; Nelly Puspandari; Subangkit; Vivi Setiawaty                                                                                                                                                                                                                                                            |
| EPI_ISL_4491502, EPI_ISL_4491503, EPI_ISL_4491504, EPI_ISL_4491505, EPI_ISL_4491506, EPI_ISL_4491507, EPI_ISL_4491508, EPI_ISL_4491509, EPI_ISL_4491510, EPI_ISL_4491511, EPI_ISL_4491512, EPI_ISL_4491513, EPI_ISL_4491515, EPI_ISL_4491516, EPI_ISL_4491517, EPI_ISL_4491518, EPI_ISL_4491519, EPI_ISL_4491520                                                                                                                                                                                                                                                                                                                                                                                                                                                                                                                                                                 | see above                                  | Genomik Solidaritas Indonesia Laboratorium                                                                                                                                                                                                                                                                                                                                                                                                                                          | Annisa Muthiah Sukirman; Anuraj Shankar; Ariel Pradipta; Ayodhia Pitaloka Pasaribu; Decy Subekti; Dhahlia Agustina Cahyono; Eka Airlangga; Esti Rahayuning Tias; Gracia Felias Enos Korompis; Hasanul Arifin; Hendri Wijaya; Louisa Markus; Meutia Ayuputeri Kumaheir; Raph Hamers; Reinhart Gabriel; Stefanus Bernard; Suwari; Vania Gavrilika Wikasa                                                            |
| EPI_ISL_1283979, EPI_ISL_1284058, EPI_ISL_1284186, EPI_ISL_1622410                                                                                                                                                                                                                                                                                                                                                                                                                                                                                                                                                                                                                                                                                                                                                                                                               | RS Cendana                                 | Eijkman Institute for Molecular Biology, Ministry of Research and Technology/National Agency for Research and Innovation                                                                                                                                                                                                                                                                                                                                                            | Amin Soebandrio; Edison Johar; Frilasita A Yudhaputri; Hidayat Trimarsanto; Iskandar Adnan; Khin Saw Myint; Lydia V. Panggalo; Muhammad Rezki Rasyak; Safarina G Malik; Sukma Oktavianthi; Willy Agustine                                                                                                                                                                                                         |
| EPI_ISL_2868902, EPI_ISL_2868907, EPI_ISL_2868909, EPI_ISL_2868910, EPI_ISL_2987596                                                                                                                                                                                                                                                                                                                                                                                                                                                                                                                                                                                                                                                                                                                                                                                              | RS Cinta Kasih Tzu Chi                     | National Institute of Health Research and Development                                                                                                                                                                                                                                                                                                                                                                                                                               | Arie Ardiansyah Nugraha; Fajar Nur Sulistiyohadi; Hana Apsari Pawestri; Hartanti Dian Ikawati; Kartika Dewi Puspa; Krisna Pangesti; Nelly Puspandari; Subangkit; Triyani Soekarso; Vivi Setiawaty                                                                                                                                                                                                                 |
| EPI_ISL_3138767                                                                                                                                                                                                                                                                                                                                                                                                                                                                                                                                                                                                                                                                                                                                                                                                                                                                  | RS Cinta Kasih Tzuchi                      | National Institute of Health Research and Development                                                                                                                                                                                                                                                                                                                                                                                                                               | Arie Ardiansyah Nugraha; Fajar Nur Sulistiyohadi; Hana Apsari Pawestri; Hartanti Dian Ikawati; Kartika Dewi Puspa; Krisna Pangesti; Nelly Puspandari; Subangkit; Triyani Soekarso; Vivi Setiawaty                                                                                                                                                                                                                 |
| EPI_ISL_3086880                                                                                                                                                                                                                                                                                                                                                                                                                                                                                                                                                                                                                                                                                                                                                                                                                                                                  | RS Citra Medika                            | Indonesian Institute of Sciences (LIPI)                                                                                                                                                                                                                                                                                                                                                                                                                                             | Annisa D. Septiani; Asep M. Ridwanulloh; Indriawati; Isa Nuryana; Lusiana; Maya Komalasari; Michael Saut Parulian; Ocha P. Meitha; Sugiyono Saputra; Syaiful Rizal; Willery Yeo; Yuhoniz A. Maryam                                                                                                                                                                                                                |
| EPI_ISL_888987                                                                                                                                                                                                                                                                                                                                                                                                                                                                                                                                                                                                                                                                                                                                                                                                                                                                   | RS Citra Medika Depok                      | Eijkman Institute for Molecular Biology, Ministry of Research and Technology/National Agency for Research and Innovation                                                                                                                                                                                                                                                                                                                                                            | Amin Soebandrio; Edison Johar; Frilasita A Yudhaputri; Hidayat Trimarsanto; Iskandar Adnan; Khin Saw Myint; Lydia V. Panggalo; Safarina G Malik; Sukma Oktavianthi; Willy Agustine                                                                                                                                                                                                                                |
| EPI_ISL_5021361, EPI_ISL_5021369, EPI_ISL_5021489, EPI_ISL_5021497, EPI_ISL_5021536, EPI_ISL_5021552, EPI_ISL_5021569, EPI_ISL_5021577, EPI_ISL_5021587, EPI_ISL_5021590                                                                                                                                                                                                                                                                                                                                                                                                                                                                                                                                                                                                                                                                                                         | see above                                  | Eijkman Research Center for Molecular Biology, National Research and Innovation Agency; Microbiology Laboratory, Faculty of Medicine, University of Sumatera Utara                                                                                                                                                                                                                                                                                                                  | Amin Soebandrio; Ananda Wibawanta Ginting; Dian Dwi Wahyuni; Edison Johar; Frilasita A Yudhaputri; Hidayat Trimarsanto; Inke Nadia Diniyanti Lubis; Iskandar Adnan; Jessica R Saragih; Khin Saw Myint; Lidwina Priliani; Lydia V Panggalo; Muhammad Rezki Rasyak; R Lia Kusumawati; Safarina G Malik; Sukma Oktavianthi; Tryna Tania; Willy Agustine                                                              |
| EPI_ISL_4760490                                                                                                                                                                                                                                                                                                                                                                                                                                                                                                                                                                                                                                                                                                                                                                                                                                                                  | RS Darurat Covid Wonokerto Kab Pekalongan  | Balai Laboratorium Kesehatan Dan Pengujian Alat Kesehatan Provinsi Jawa Tengah                                                                                                                                                                                                                                                                                                                                                                                                      | Alia Wijayanti; Dwi Nursetyaaasih; Dyah Ayu; Endah Wahyu Y; Ismi Farhati; Purnomo; Sekti Handayani; Wiwik Peni; Yekti Hediningsih                                                                                                                                                                                                                                                                                 |
| EPI_ISL_4730564, EPI_ISL_4730565, EPI_ISL_4730566, EPI_ISL_4730567, EPI_ISL_4730568, EPI_ISL_5022958, EPI_ISL_5022959                                                                                                                                                                                                                                                                                                                                                                                                                                                                                                                                                                                                                                                                                                                                                            | see above                                  | National Institute of Health Research and Development                                                                                                                                                                                                                                                                                                                                                                                                                               | Arie Ardiansyah Nugraha; Fajar Nur Sulistiyohadi; Hana Apsari Pawestri; Hartanti Dian Ikawati; Kartika Dewi Puspa; Krisna Pangesti; Nelly Puspandari; Subangkit; Triyani Soekarso; Vivi Setiawaty                                                                                                                                                                                                                 |
| EPI_ISL_2337254                                                                                                                                                                                                                                                                                                                                                                                                                                                                                                                                                                                                                                                                                                                                                                                                                                                                  | RS Dr Oen Solo Baru                        | Genetics Working Group (Pokja Genetik) Faculty of Medicine, Public Health and Nursing Universitas Gadjah Mada (FK-KMK UGM); Disease Investigation Center Wates Ministry of Agriculture Indonesia; Department of Microbiology FK-KMK UGM; Laboratorium Diagnostik Yayasan Tahija World Mosquito Program (WMP) Yogyakarta Center for Tropical Medicine FK-KMK UGM; Integrated Research Center FK-KMK UGM; Department of Computer Science and Electronics FMIPA UGM; RSUP Dr. Sardjito | Afiahayati; Dwi AA Nugrahaningsih; Edwin W. Daniwijaya; Eggi Arguni; Endah Supriyati; Gunadi; Hana F Hanifin; Hendra Wibawa; Irene Tania; Kristy Iskandar; Ludhang P. Rizki; Marcellus; Mohamad S. Hakim; Nungki Anggorowati; Siswanto; Titik Nuryastuti; Tri Wibawa                                                                                                                                              |
| EPI_ISL_2964917, EPI_ISL_2964918, EPI_ISL_2964919, EPI_ISL_2964920, EPI_ISL_2964921                                                                                                                                                                                                                                                                                                                                                                                                                                                                                                                                                                                                                                                                                                                                                                                              | RS Dr. OEN KANDANG SAPI SOLO               | Genetics Working Group (Pokja Genetik) Faculty of Medicine, Public Health and Nursing Universitas Gadjah Mada (FK-KMK UGM); Disease Investigation Center Wates Ministry of Agriculture Indonesia; Department of Microbiology FK-KMK UGM; Laboratorium Diagnostik Yayasan Tahija World Mosquito Program (WMP) Yogyakarta Center for Tropical Medicine FK-KMK UGM; Integrated Research Center FK-KMK UGM; Department of Computer Science and Electronics FMIPA UGM; RSUP Dr. Sardjito | Afiahayati; Alvina A Setiawan; Cita S Amalia; Dwi AA Nugrahaningsih; Dwi Indaryati; Dyah A Puspitarani; Edwin W. Daniwijaya; Eggi Arguni; Endah Supriyati; Gunadi; Hana F Hanifin; Hendra Wibawa; Indarto Sulistiyono; Irene Tania; Khanza A Vujira; Kristy Iskandar; Ludhang P. Rizki; Marcellus; Mohamad S. Hakim; Nungki Anggorowati; Pramesti G Dewi; Siswanto; Susan Simanjaya; Titik Nuryastuti; Tri Wibawa |
| EPI_ISL_2964707, EPI_ISL_2964872                                                                                                                                                                                                                                                                                                                                                                                                                                                                                                                                                                                                                                                                                                                                                                                                                                                 | RS Dr. Oen Kandang Sapi Solo               | Genetics Working Group (Pokja Genetik) Faculty of Medicine, Public Health and Nursing Universitas Gadjah Mada (FK-KMK UGM); Disease Investigation Center Wates Ministry of Agriculture Indonesia; Department of Microbiology FK-KMK UGM; Laboratorium Diagnostik Yayasan Tahija World Mosquito Program (WMP) Yogyakarta Center for Tropical Medicine FK-KMK UGM; Integrated Research Center FK-KMK UGM; Department of Computer Science and Electronics FMIPA UGM; RSUP Dr. Sardjito | Afiahayati; Alvina A Setiawan; Cita S Amalia; Dwi AA Nugrahaningsih; Dwi Indaryati; Dyah A Puspitarani; Edwin W. Daniwijaya; Eggi Arguni; Endah Supriyati; Gunadi; Hendra Wibawa; Indarto Sulistiyono; Kristy Iskandar; Ludhang P. Rizki; Marcellus; Mohamad S. Hakim; Nungki Anggorowati; Pramesti G Dewi; Siswanto; Susan Simanjaya; Titik Nuryastuti; Tri Wibawa                                               |
| EPI_ISL_2844824                                                                                                                                                                                                                                                                                                                                                                                                                                                                                                                                                                                                                                                                                                                                                                                                                                                                  | RS Family Medical center, Bogor, West Java | Biosafety Level-3 Laboratory, Indonesian Institute of Sciences (LIPI)                                                                                                                                                                                                                                                                                                                                                                                                               | Anggia Prasetyoputri; Erwin F. Hasrianda; Fahrurrozi; Herjuno A. Nugroho; Nova D. Yanthi; Ratih A. Ningrum                                                                                                                                                                                                                                                                                                        |
| EPI_ISL_568693, EPI_ISL_574603                                                                                                                                                                                                                                                                                                                                                                                                                                                                                                                                                                                                                                                                                                                                                                                                                                                   | RS Freeport TembagaPura                    | Eijkman Institute for Molecular Biology, Ministry of Research and Technology/National Agency for Research and Innovation                                                                                                                                                                                                                                                                                                                                                            | Amin Soebandrio; David H Muljono; Edison Johar; Frilasita A Yudhaputri; Herawati Sudoyo; Hidayat Trimarsanto; Iskandar A Adnan; Khin Saw Myint; Safarina G Malik; Willy Agustine                                                                                                                                                                                                                                  |
| EPI_ISL_3836265                                                                                                                                                                                                                                                                                                                                                                                                                                                                                                                                                                                                                                                                                                                                                                                                                                                                  | RS GADING PLUIT                            | Genomik Solidaritas Indonesia Laboratorium                                                                                                                                                                                                                                                                                                                                                                                                                                          | Anna Christina Brazil; Annisa Muthiah Sukirman; Anuraj Shankar; Ariel Pradipta; David Hendra Haryanto; Dhahlia Agustina Cahyono; Dwi Oktavia; Eko Susanti; Gracia Felias Enos Korompis; Louisa Markus; Meutia Ayuputeri Kumaheir; Ngabila Salama; Pratiwi Srikandi Yudhastari; Reinhart Gabriel; Tiranti Vindha; Vania Gavrilika Wikasa                                                                           |
| EPI_ISL_2868915                                                                                                                                                                                                                                                                                                                                                                                                                                                                                                                                                                                                                                                                                                                                                                                                                                                                  | RS Gading Pluit                            | National Institute of Health Research and Development                                                                                                                                                                                                                                                                                                                                                                                                                               | Arie Ardiansyah Nugraha; Hana Apsari Pawestri; Hartanti Dian Ikawati; Kartika Dewi Puspa; Krisna Pangesti; Nelly Puspandari; Subangkit; Triyani Soekarso; Vivi Setiawaty                                                                                                                                                                                                                                          |
| EPI_ISL_2364586, EPI_ISL_2364591                                                                                                                                                                                                                                                                                                                                                                                                                                                                                                                                                                                                                                                                                                                                                                                                                                                 | RS Graha Juanda                            | Eijkman Institute for Molecular Biology, National Agency for Research and Innovation                                                                                                                                                                                                                                                                                                                                                                                                | Amin Soebandrio; Edison Johar; Frilasita A Yudhaputri; Hidayat Trimarsanto; Iskandar Adnan; Khin Saw Myint; Lidwina Priliani; Lydia V. Panggalo; Muhammad Rezki Rasyak; Safarina G Malik; Sukma Oktavianthi; Willy Agustine                                                                                                                                                                                       |
| EPI_ISL_1284303                                                                                                                                                                                                                                                                                                                                                                                                                                                                                                                                                                                                                                                                                                                                                                                                                                                                  | RS Grha Kedoya                             | Eijkman Institute for Molecular Biology, Ministry of Research and Technology/National Agency for Research and Innovation                                                                                                                                                                                                                                                                                                                                                            | Amin Soebandrio; Edison Johar; Frilasita A Yudhaputri; Hidayat Trimarsanto; Iskandar Adnan; Khin Saw Myint; Lydia V. Panggalo; Safarina G Malik; Sukma Oktavianthi; Willy Agustine                                                                                                                                                                                                                                |
| EPI_ISL_2614728, EPI_ISL_2614729                                                                                                                                                                                                                                                                                                                                                                                                                                                                                                                                                                                                                                                                                                                                                                                                                                                 | RS Grha Kedoya                             | Eijkman Institute for Molecular Biology, National Research and Innovation Agency                                                                                                                                                                                                                                                                                                                                                                                                    | Amin Soebandrio; Edison Johar; Frilasita A Yudhaputri; Hidayat Trimarsanto; Iskandar Adnan; Khin Saw Myint; Lidwina Priliani; Lydia V. Panggalo; Muhammad Rezki Rasyak; Safarina G Malik; Sukma Oktavianthi; Willy Agustine                                                                                                                                                                                       |
| EPI_ISL_3030000                                                                                                                                                                                                                                                                                                                                                                                                                                                                                                                                                                                                                                                                                                                                                                                                                                                                  | RS Grha MM2100                             | Eijkman Institute for Molecular Biology, National Research and Innovation Agency                                                                                                                                                                                                                                                                                                                                                                                                    | Amin Soebandrio; Edison Johar; Frilasita A Yudhaputri; Hidayat Trimarsanto; Iskandar Adnan; Khin Saw Myint; Lidwina Priliani; Lydia V. Panggalo; Muhammad Rezki Rasyak; Safarina G Malik; Sukma Oktavianthi; Willy Agustine                                                                                                                                                                                       |
| EPI_ISL_4115720, EPI_ISL_4115728, EPI_ISL_4115731, EPI_ISL_4115734, EPI_ISL_4115738, EPI_ISL_4115742, EPI_ISL_4115745, EPI_ISL_4115748, EPI_ISL_4115751, EPI_ISL_4115755, EPI_ISL_4115758, EPI_ISL_4115762, EPI_ISL_4115765, EPI_ISL_4115768, EPI_ISL_4115771, EPI_ISL_4115774, EPI_ISL_4115778, EPI_ISL_4115782, EPI_ISL_4115786, EPI_ISL_4115789, EPI_ISL_4115793, EPI_ISL_4115796, EPI_ISL_4115799, EPI_ISL_4115802, EPI_ISL_4115806, EPI_ISL_4115810, EPI_ISL_4115813, EPI_ISL_4115817, EPI_ISL_4115820, EPI_ISL_4115823, EPI_ISL_4115827, EPI_ISL_4115834, EPI_ISL_4115839, EPI_ISL_4115845, EPI_ISL_4115850, EPI_ISL_4115853, EPI_ISL_4115856, EPI_ISL_4115859, EPI_ISL_4115864, EPI_ISL_4115867, EPI_ISL_4115870, EPI_ISL_4115878, EPI_ISL_4115888, EPI_ISL_4115891, EPI_ISL_4115901, EPI_ISL_4115904, EPI_ISL_4115908, EPI_ISL_4740190, EPI_ISL_4740191, EPI_ISL_4740193 | see above                                  | Genomik Solidaritas Indonesia Laboratorium                                                                                                                                                                                                                                                                                                                                                                                                                                          | Annisa Muthiah Sukirman; Anuraj Shankar; Ariel Pradipta; Basti Andriyoko; Carissa Sintca Wijaya; Delita Prihatni; Dewi Kartika Turbawati; Dhahlia Agustina Cahyono; Gracia Felias Enos Korompis; Himawan Masyhuri; Louisa Markus; Meutia Ayuputeri Kumaheir; Neng Hilma Hamidah; Pratiwi Srikandi Yudhastari; Vania Gavrilika Wikasa; Vivi Setyawati                                                              |
| EPI_ISL_574613, EPI_ISL_574615, EPI_ISL_1622367, EPI_ISL_1622384, EPI_ISL_1622385                                                                                                                                                                                                                                                                                                                                                                                                                                                                                                                                                                                                                                                                                                                                                                                                | RS Harapan Bunda                           | Eijkman Institute for Molecular Biology, Ministry of Research and Technology/National Agency for Research and Innovation                                                                                                                                                                                                                                                                                                                                                            | Amin Soebandrio; David H Muljono; Edison Johar; Frilasita A Yudhaputri; Herawati Sudoyo; Hidayat Trimarsanto; Iskandar Adnan; Khin Saw Myint; Lydia V. Panggalo; Muhammad Rezki Rasyak; Safarina G Malik; Sukma Oktavianthi; Willy Agustine                                                                                                                                                                       |
| EPI_ISL_2013509, EPI_ISL_2364576, EPI_ISL_2364608, EPI_ISL_2364609, EPI_ISL_2364635                                                                                                                                                                                                                                                                                                                                                                                                                                                                                                                                                                                                                                                                                                                                                                                              | RS Harapan Bunda                           | Eijkman Institute for Molecular Biology, National Agency for Research and Innovation                                                                                                                                                                                                                                                                                                                                                                                                | Amin Soebandrio; Edison Johar; Frilasita A Yudhaputri; Hidayat Trimarsanto; Iskandar Adnan; Khin Saw Myint; Lidwina Priliani; Lydia V. Panggalo; Muhammad Rezki Rasyak; Safarina G Malik; Sukma Oktavianthi; Willy Agustine                                                                                                                                                                                       |
| EPI_ISL_2614655, EPI_ISL_2614690, EPI_ISL_2614697, EPI_ISL_2614698, EPI_ISL_2614714                                                                                                                                                                                                                                                                                                                                                                                                                                                                                                                                                                                                                                                                                                                                                                                              | RS Harapan Bunda                           | Eijkman Institute for Molecular Biology, National Research and Innovation Agency                                                                                                                                                                                                                                                                                                                                                                                                    | Amin Soebandrio; Edison Johar; Frilasita A Yudhaputri; Hidayat Trimarsanto; Iskandar Adnan; Khin Saw Myint; Lidwina Priliani; Lydia V. Panggalo; Muhammad Rezki Rasyak; Safarina G Malik; Sukma Oktavianthi; Willy Agustine                                                                                                                                                                                       |
| EPI_ISL_1284176, EPI_ISL_1284240                                                                                                                                                                                                                                                                                                                                                                                                                                                                                                                                                                                                                                                                                                                                                                                                                                                 | RS Harapan Mulia Cibarusah                 | Eijkman Institute for Molecular Biology, Ministry of Research and Technology/National Agency for Research and Innovation                                                                                                                                                                                                                                                                                                                                                            | Amin Soebandrio; Edison Johar; Frilasita A Yudhaputri; Hidayat Trimarsanto; Iskandar Adnan; Khin Saw Myint; Lydia V. Panggalo; Safarina G Malik; Sukma Oktavianthi; Willy Agustine                                                                                                                                                                                                                                |
| EPI_ISL_2614699, EPI_ISL_947290                                                                                                                                                                                                                                                                                                                                                                                                                                                                                                                                                                                                                                                                                                                                                                                                                                                  | RS Harapan Mulia Cibarusah                 | Eijkman Institute for Molecular Biology, National Research and Innovation Agency                                                                                                                                                                                                                                                                                                                                                                                                    | Amin Soebandrio; Edison Johar; Frilasita A Yudhaputri; Hidayat Trimarsanto; Iskandar Adnan; Khin Saw Myint; Lidwina Priliani; Lydia V. Panggalo; Muhammad Rezki Rasyak; Safarina G Malik; Sukma Oktavianthi; Willy Agustine                                                                                                                                                                                       |
| EPI_ISL_888983                                                                                                                                                                                                                                                                                                                                                                                                                                                                                                                                                                                                                                                                                                                                                                                                                                                                   | RS Hermina Bitung                          | Eijkman Institute for Molecular Biology, Ministry of Research and Technology/National Agency for Research and Innovation                                                                                                                                                                                                                                                                                                                                                            | Amin Soebandrio; Edison Johar; Frilasita A Yudhaputri; Hidayat Trimarsanto; Iskandar Adnan; Khin Saw Myint; Lydia V. Panggalo; Safarina G Malik; Sukma Oktavianthi; Willy Agustine                                                                                                                                                                                                                                |
| EPI_ISL_888984                                                                                                                                                                                                                                                                                                                                                                                                                                                                                                                                                                                                                                                                                                                                                                                                                                                                   | RS Hermina Depok                           | Eijkman Institute for Molecular Biology, Ministry of Research and Technology/National Agency for Research and Innovation                                                                                                                                                                                                                                                                                                                                                            | Amin Soebandrio; Edison Johar; Frilasita A Yudhaputri; Hidayat Trimarsanto; Iskandar Adnan; Khin Saw Myint; Lydia V. Panggalo; Safarina G Malik; Sukma Oktavianthi; Willy Agustine                                                                                                                                                                                                                                |
| EPI_ISL_2614736, EPI_ISL_3029934, EPI_ISL_3029935                                                                                                                                                                                                                                                                                                                                                                                                                                                                                                                                                                                                                                                                                                                                                                                                                                | RS Hermina Depok                           | Eijkman Institute for Molecular Biology, National Research and Innovation Agency                                                                                                                                                                                                                                                                                                                                                                                                    | Amin Soebandrio; Edison Johar; Frilasita A Yudhaputri; Hidayat Trimarsanto; Iskandar Adnan; Khin Saw Myint; Lidwina Priliani; Lydia V. Panggalo; Muhammad Rezki Rasyak; Safarina G Malik; Sukma Oktavianthi; Willy Agustine                                                                                                                                                                                       |

|                                                                                                                                                                                                                                                                                                                                                                                                                                                                                            |                                                                            |                                                                                                                                                                                                                                                                                                                                                                                                                                                                                     |                                                                                                                                                                                                                                                                                                                                                                                                                                                                                                                                            |
|--------------------------------------------------------------------------------------------------------------------------------------------------------------------------------------------------------------------------------------------------------------------------------------------------------------------------------------------------------------------------------------------------------------------------------------------------------------------------------------------|----------------------------------------------------------------------------|-------------------------------------------------------------------------------------------------------------------------------------------------------------------------------------------------------------------------------------------------------------------------------------------------------------------------------------------------------------------------------------------------------------------------------------------------------------------------------------|--------------------------------------------------------------------------------------------------------------------------------------------------------------------------------------------------------------------------------------------------------------------------------------------------------------------------------------------------------------------------------------------------------------------------------------------------------------------------------------------------------------------------------------------|
| EPI_ISL_2854712,<br>EPI_ISL_2854723,<br>EPI_ISL_2854724                                                                                                                                                                                                                                                                                                                                                                                                                                    | RS Hermina Depok                                                           | National Institute of Health Research and Development                                                                                                                                                                                                                                                                                                                                                                                                                               | ; Arie Ardiansyah Nugraha; Hana Apsari Pawestri; Hartanti Dian Ikawati; Kartika Dewi Puspa; Krisna Pangesti; Nelly Puspandari; Subangkit; Triyani Soekarso; Vivi Setiawaty                                                                                                                                                                                                                                                                                                                                                                 |
| EPI_ISL_2854725<br>EPI_ISL_2617518<br>EPI_ISL_574612                                                                                                                                                                                                                                                                                                                                                                                                                                       | RS Hermina Galaxy<br>RS Hermina Kemayoran<br>RS Hermina Mekarsari          | National Institute of Health Research and Development<br>National Institute of Health Research and Development<br>Eijkman Institute for Molecular Biology, Ministry of Research and Technology/National Agency for Research and Innovation                                                                                                                                                                                                                                          | ; Arie Ardiansyah Nugraha; Hana Apsari Pawestri; Hartanti Dian Ikawati; Kartika Dewi Puspa; Krisna Pangesti; Nelly Puspandari; Subangkit; Triyani Soekarso; Vivi Setiawaty<br>Arie Ardiansyah Nugraha; Hana Apsari Pawestri; Hartanti Dian Ikawati; Kartika Dewi Puspa; Krisna Pangesti; Nelly Puspandari; Subangkit; Triyani Soekarso; Vivi Setiawaty<br>Amin Soebandrio; David H Muljono; Edison Johar; Frilasita A Yudhaputri; Herawati Sudoyo; Hidayat Trimarsanto; Iskandar A Adnan; Khin Saw Myint; Safarina G Malik; Willy Agustine |
| EPI_ISL_3029937<br>EPI_ISL_888985                                                                                                                                                                                                                                                                                                                                                                                                                                                          | RS Hermina Periku<br>RS Hermina Serpong                                    | Eijkman Institute for Molecular Biology, National Research and Innovation Agency<br>Eijkman Institute for Molecular Biology, Ministry of Research and Technology/National Agency for Research and Innovation                                                                                                                                                                                                                                                                        | Amin Soebandrio; Edison Johar; Frilasita A Yudhaputri; Hidayat Trimarsanto; Iskandar Adnan; Khin Saw Myint; Lidwina Priliani; Lydia V. Panggalo; Muhammad Rezki Rasyak; Safarina G Malik; Sukma Oktavianthi; Willy Agustine<br>Amin Soebandrio; Edison Johar; Frilasita A Yudhaputri; Hidayat Trimarsanto; Iskandar Adnan; Khin Saw Myint; Lydia V. Panggalo; Safarina G Malik; Sukma Oktavianthi; Willy Agustine                                                                                                                          |
| EPI_ISL_889017<br><br>EPI_ISL_574607                                                                                                                                                                                                                                                                                                                                                                                                                                                       | RS Hermina Tangerang<br><br>RS Husada                                      | Eijkman Institute for Molecular Biology, Ministry of Research and Technology/National Agency for Research and Innovation<br>Eijkman Institute for Molecular Biology, Ministry of Research and Technology/National Agency for Research and Innovation                                                                                                                                                                                                                                | Amin Soebandrio; Edison Johar; Frilasita A Yudhaputri; Hidayat Trimarsanto; Iskandar Adnan; Khin Saw Myint; Lydia V. Panggalo; Safarina G Malik; Sukma Oktavianthi; Willy Agustine<br>Amin Soebandrio; David H Muljono; Edison Johar; Frilasita A Yudhaputri; Herawati Sudoyo; Hidayat Trimarsanto; Iskandar A Adnan; Khin Saw Myint; Safarina G Malik; Willy Agustine                                                                                                                                                                     |
| EPI_ISL_2617519,<br>EPI_ISL_2617522,<br>EPI_ISL_2617523,<br>EPI_ISL_3138837                                                                                                                                                                                                                                                                                                                                                                                                                | RS IMC Bintaro                                                             | National Institute of Health Research and Development                                                                                                                                                                                                                                                                                                                                                                                                                               | Arie Ardiansyah Nugraha; Fajar Nur Sulistiyohadi; Hana Apsari Pawestri; Hartanti Dian Ikawati; Kartika Dewi Puspa; Krisna Pangesti; Nelly Puspandari; Subangkit; Triyani Soekarso; Vivi Setiawaty                                                                                                                                                                                                                                                                                                                                          |
| EPI_ISL_4004698,<br>EPI_ISL_4004703<br>EPI_ISL_2854748                                                                                                                                                                                                                                                                                                                                                                                                                                     | RS Ibu dan Anak Permata Pertiwi<br>RS Ichsan Medical Centre Bintaro Tangel | National Research and Innovation Agency (BRIN-Indonesia)<br>National Institute of Health Research and Development                                                                                                                                                                                                                                                                                                                                                                   | Ahmad Fathoni; Anggia Prasetyoputri; Anik B. Dharmayanthi; Asep M. Ridwanulloh; Hariyatun; Indriawati; Rifki Sadikin; Sugiyono Saputra; Suvia Widyaningrum; Syam B. Iryanto<br>; Arie Ardiansyah Nugraha; Hana Apsari Pawestri; Hartanti Dian Ikawati; Kartika Dewi Puspa; Krisna Pangesti; Nelly Puspandari; Subangkit; Triyani Soekarso; Vivi Setiawaty                                                                                                                                                                                  |
| EPI_ISL_4778322                                                                                                                                                                                                                                                                                                                                                                                                                                                                            | RS Islam Muhammadiyah Rodiyah Achid Moga Pemalang                          | Balai Laboratorium Kesehatan Dan Pengujian Alat Kesehatan Provinsi Jawa Tengah                                                                                                                                                                                                                                                                                                                                                                                                      | Alia Wijayanti; Dwi Nursetyaasih; Dyah Ayu; Endah Wahyu Y; Ismi Farhati; Purnomo; Sekti Handayani; Wiwik Peni; Yekti Hediningsih                                                                                                                                                                                                                                                                                                                                                                                                           |
| EPI_ISL_4757248,<br>EPI_ISL_4760364                                                                                                                                                                                                                                                                                                                                                                                                                                                        | RS Islam Purwodadi Grobogan                                                | Balai Laboratorium Kesehatan Dan Pengujian Alat Kesehatan Provinsi Jawa Tengah                                                                                                                                                                                                                                                                                                                                                                                                      | Alia Wijayanti; Dwi Nursetyaasih; Dyah Ayu; Endah Wahyu Y; Ismi Farhati; Purnomo; Sekti Handayani; Wiwik Peni; Yekti Hediningsih                                                                                                                                                                                                                                                                                                                                                                                                           |
| EPI_ISL_1283987,<br>EPI_ISL_1284322                                                                                                                                                                                                                                                                                                                                                                                                                                                        | RS Islam Sari Asih Ar-Rahmah                                               | Eijkman Institute for Molecular Biology, Ministry of Research and Technology/National Agency for Research and Innovation                                                                                                                                                                                                                                                                                                                                                            | Amin Soebandrio; Edison Johar; Frilasita A Yudhaputri; Hidayat Trimarsanto; Iskandar Adnan; Khin Saw Myint; Lydia V. Panggalo; Safarina G Malik; Sukma Oktavianthi; Willy Agustine                                                                                                                                                                                                                                                                                                                                                         |
| EPI_ISL_2364605<br>EPI_ISL_4968087,<br>EPI_ISL_4969010,<br>EPI_ISL_4969082,<br>EPI_ISL_4969086                                                                                                                                                                                                                                                                                                                                                                                             | RS IJH                                                                     | Genetics Working Group (Pokja Genetik) Faculty of Medicine, Public Health and Nursing Universitas Gadjah Mada (FK-KMK UGM); Disease Investigation Center Wates Ministry of Agriculture Indonesia; Department of Microbiology FK-KMK UGM; Laboratorium Diagnostik Yayasan Tahlia World Mosquito Program (WMP) Yogyakarta Center for Tropical Medicine FK-KMK UGM; Integrated Research Center FK-KMK UGM; Department of Computer Science and Electronics FMIPA UGM; RSUP Dr. Sardjito | Afhayahati; Alvina A Setiawan; Cita S Amalia; Dwi AA Nugrahaningsih; Dwi Indaryati; Dyah A Puspitarani; Edwin W. Darniwijaya; Eggi Arguni; Endah Supriyati; Gunadi; Hana F Hanifin; Hendra Wibawa; Indarto Sulistiyono; Irene Tania; Khanza a Vujira; Kristy Iskandar; Ludhang P. Rizki; Marcellus; Mohamad S. Hakim; Nungki Anggorowati; Pramesti G Dewi; Siswanto; Susan Simanjaya; Titik Nuryastuti; Tri Wibawa                                                                                                                         |
| EPI_ISL_3138833,<br>EPI_ISL_3138834,<br>EPI_ISL_3138835,<br>EPI_ISL_3138836                                                                                                                                                                                                                                                                                                                                                                                                                | RS Jantung Dan Pembuluh Darah Harapan Kita                                 | National Institute of Health Research and Development                                                                                                                                                                                                                                                                                                                                                                                                                               | Arie Ardiansyah Nugraha; Fajar Nur Sulistiyohadi; Hana Apsari Pawestri; Hartanti Dian Ikawati; Kartika Dewi Puspa; Krisna Pangesti; Nelly Puspandari; Subangkit; Triyani Soekarso; Vivi Setiawaty                                                                                                                                                                                                                                                                                                                                          |
| EPI_ISL_3138860,<br>EPI_ISL_3138861,<br>EPI_ISL_3138862                                                                                                                                                                                                                                                                                                                                                                                                                                    | RS Jantung dan Pembulu Darah Harapan Kita                                  | National Institute of Health Research and Development                                                                                                                                                                                                                                                                                                                                                                                                                               | ; Arie Ardiansyah Nugraha; Fajar Nur Sulistiyohadi; Hana Apsari Pawestri; Hartanti Dian Ikawati; Kartika Dewi Puspa; Krisna Pangesti; Nelly Puspandari; Subangkit; Triyani Soekarso; Vivi Setiawaty                                                                                                                                                                                                                                                                                                                                        |
| EPI_ISL_3216546,<br>EPI_ISL_3216547                                                                                                                                                                                                                                                                                                                                                                                                                                                        | RS Jantung dan Pembuluh Darah Harapan Kita                                 | National Institute of Health Research and Development                                                                                                                                                                                                                                                                                                                                                                                                                               | Arie Ardiansyah Nugraha; Fajar Nur Sulistiyohadi; Hana Apsari Pawestri; Hartanti Dian Ikawati; Kartika Dewi Puspa; Krisna Pangesti; Nelly Puspandari; Subangkit; Triyani Soekarso; Vivi Setiawaty                                                                                                                                                                                                                                                                                                                                          |
| EPI_ISL_4090556,<br>EPI_ISL_4090557,<br>EPI_ISL_4090558,<br>EPI_ISL_4090559,<br>EPI_ISL_4090560                                                                                                                                                                                                                                                                                                                                                                                            | RS Karakau Medika                                                          | National Institute of Health Research and Development                                                                                                                                                                                                                                                                                                                                                                                                                               | Arie Ardiansyah Nugraha; Fajar Nur; Hana Apsari Pawestri; Hartanti Dian Ikawati; Kartika Dewi Puspa; Krisna Pangesti; Nelly Puspandari; Subangkit; Sulistiyohadi; Triyani Soekarso; Vivi Setiawaty                                                                                                                                                                                                                                                                                                                                         |
| EPI_ISL_4417826, EPI_ISL_4417827, EPI_ISL_4417828, EPI_ISL_4417829, EPI_ISL_4417830, EPI_ISL_4417831, EPI_ISL_4417832, EPI_ISL_4417833, EPI_ISL_4417834, EPI_ISL_4417835, EPI_ISL_4417836, EPI_ISL_4417837, EPI_ISL_4417838, EPI_ISL_4417839, EPI_ISL_4417840, EPI_ISL_4417841, EPI_ISL_4417842, EPI_ISL_4417843, EPI_ISL_4417844, EPI_ISL_4417845, EPI_ISL_4417846, EPI_ISL_4417847, EPI_ISL_4417849, EPI_ISL_4417850, EPI_ISL_4417851, EPI_ISL_4468542, EPI_ISL_4491514, EPI_ISL_5098156 | RS Karitas / EIJKMAN OXFORD CLINICAL RESEARCH UNIT<br>see above            | Genomik Solidaritas Indonesia Laboratorium                                                                                                                                                                                                                                                                                                                                                                                                                                          | ; Anis Karunlawati; Annisa Muthiah Sukirman; Anuraj Shankar; Ariel Pradipta; Bonifacius; Carissa Sintca Wijaya; Claus Bough; Decy Subekti; Dhahlia Agustina Cahyono; Dian Tri Wahyudi; Dwi Utomo Nusantara; Esti Rahayuning Tias; Gracia Felias Enos Korompis; Himawan Masyhuri; Kevin Baird; Louisa Markus; Meutia Ayuputeri Kumaheri; Raph Hamers; Reinhart Gabriel; Stefanus Bernard; Suwarti; Vania Gavriila Wikasa                                                                                                                    |
| EPI_ISL_2854749,<br>EPI_ISL_2868905,<br>EPI_ISL_3138820,<br>EPI_ISL_3138821,<br>EPI_ISL_3138822,<br>EPI_ISL_3278297                                                                                                                                                                                                                                                                                                                                                                        | RS Kartika Pulomas                                                         | National Institute of Health Research and Development                                                                                                                                                                                                                                                                                                                                                                                                                               | Arie Ardiansyah Nugraha; Fajar Nur Sulistiyohadi; Hana Apsari Pawestri; Hartanti Dian Ikawati; Kartika Dewi Puspa; Krisna Pangesti; Nelly Puspandari; Subangkit; Triyani Soekarso; Vivi Setiawaty                                                                                                                                                                                                                                                                                                                                          |
| EPI_ISL_763064                                                                                                                                                                                                                                                                                                                                                                                                                                                                             | RS Kasih Ibu, Surakarta                                                    | Universitas Sebelas Maret (UNS); Rumah Sakit UNS (RS-UNS); National Institute of Health Research and Development, Indonesian Ministry of Health.                                                                                                                                                                                                                                                                                                                                    | Affif A Ghufron; Arie A Nugraha; Betty Suryawati; Dewi Puspa; Hana A Pawestri; Hartanti Dian Ika; Hartono; Kartika; Maryani; Revi G H Novika; Vivi Setiawaty.; Yulia Sari                                                                                                                                                                                                                                                                                                                                                                  |
| EPI_ISL_4825226,<br>EPI_ISL_4825512                                                                                                                                                                                                                                                                                                                                                                                                                                                        | RS Ken Saras Ungaran                                                       | Balai Laboratorium Kesehatan Dan Pengujian Alat Kesehatan Provinsi Jawa Tengah                                                                                                                                                                                                                                                                                                                                                                                                      | Alia Wijayanti; Dwi Nursetyaasih; Dyah Ayu; Endah Wahyu Y; Ismi Farhati; Purnomo; Sekti Handayani; Wiwik Peni; Yekti Hediningsih                                                                                                                                                                                                                                                                                                                                                                                                           |
| EPI_ISL_4847179                                                                                                                                                                                                                                                                                                                                                                                                                                                                            | RS Ken Saras Ungaran Semarang                                              | Balai Laboratorium Kesehatan Dan Pengujian Alat Kesehatan Provinsi Jawa Tengah                                                                                                                                                                                                                                                                                                                                                                                                      | Alia Wijayanti; Dwi Nursetyaasih; Dyah Ayu; Endah Wahyu Y; Ismi Farhati; Purnomo; Sekti Handayani; Wiwik Peni; Yekti Hediningsih                                                                                                                                                                                                                                                                                                                                                                                                           |
| EPI_ISL_3030052,<br>EPI_ISL_3030056,<br>EPI_ISL_3030057                                                                                                                                                                                                                                                                                                                                                                                                                                    | RS Khusus Gigi dan Mulut Kota Bandung, Dinas Kesehatan Kota Bandung        | Eijkman Institute for Molecular Biology, National Research and Innovation Agency; West Java Health Laboratory                                                                                                                                                                                                                                                                                                                                                                       | Ade Fany Safitri; Amin Soebandrio; Azzania Fibriani; Cut Nur Cinthia Alamanda; Edison Johar; Ema Rahmawati; Frilasita A Yudhaputri; Hidayat Trimarsanto; Husna Nugrahapraja; Iskandar Adnan; Khin Saw Myint; Lidwina Priliani; Lydia V. Panggalo; Muhammad Rezki Rasyak; Ranza Fadhill Pratama; Rifky Waluyajati Rachman; Ryan Bayusantika Ristandi; Safarina G Malik; Sukma Oktavianthi; Tati Sutarti Sastrowiyoto; Willy Agustine                                                                                                        |
| EPI_ISL_2987604                                                                                                                                                                                                                                                                                                                                                                                                                                                                            | RS Khusus Kanker MRCCC Siloam Semanggi                                     | National Institute of Health Research and Development                                                                                                                                                                                                                                                                                                                                                                                                                               | Arie Ardiansyah Nugraha; Fajar Nur Sulistiyohadi; Hana Apsari Pawestri; Hartanti Dian Ikawati; Kartika Dewi Puspa; Krisna Pangesti; Nelly Puspandari; Subangkit; Triyani Soekarso; Vivi Setiawaty                                                                                                                                                                                                                                                                                                                                          |
| EPI_ISL_4004705                                                                                                                                                                                                                                                                                                                                                                                                                                                                            | RS Khusus Paru Kabupaten Karawang                                          | National Research and Innovation Agency (BRIN-Indonesia, VenomCoV Project Team); West Java Health Laboratory                                                                                                                                                                                                                                                                                                                                                                        | Ahmad Fathoni; Anggia Prasetyoputri; Anik B. Dharmayanthi; Asep M. Ridwanulloh; Azzania Fibriani; Cut Nur Cinthia Alamanda; Ema Rahmawati; Hariyatun; Indriawati; Karimatu Khoirunnisa; Miftahul Faridi; Rathif A. Ningrum; Rifki Sadikin; Rifky Waluyajati Rachman; Rini Robiani; Ryan Bayusantika Ristandi; Sugiyono Saputra; Syam B. Iryanto                                                                                                                                                                                            |
| EPI_ISL_1469247,<br>EPI_ISL_1469256,<br>EPI_ISL_1469257,<br>EPI_ISL_1469285,<br>EPI_ISL_1469286                                                                                                                                                                                                                                                                                                                                                                                            | RS Khusus Paru Karawang                                                    | National Institute of Health Research and Development                                                                                                                                                                                                                                                                                                                                                                                                                               | Arie Ardiansyah Nugraha; Hana Apsari Pawestri; Hartanti Dian Ikawati; Kartika Dewi Puspa; Krisna Pangesti; Nelly Puspandari; Subangkit; Triyani Soekarso; Vivi Setiawaty                                                                                                                                                                                                                                                                                                                                                                   |
| EPI_ISL_2868931<br>EPI_ISL_2854778                                                                                                                                                                                                                                                                                                                                                                                                                                                         | RS Kogabwilhan II Surabaya<br>RS Krakatau Medika, Cilegon                  | National Institute of Health Research and Development<br>National Institute of Health Research and Development                                                                                                                                                                                                                                                                                                                                                                      | Arie Ardiansyah Nugraha; Hana Apsari Pawestri; Hartanti Dian Ikawati; Kartika Dewi Puspa; Krisna Pangesti; Nelly Puspandari; Subangkit; Triyani Soekarso; Vivi Setiawaty<br>Arie Ardiansyah Nugraha; Hana Apsari Pawestri; Hartanti Dian Ikawati; Kartika Dewi Puspa; Krisna Pangesti; Nelly Puspandari; Subangkit; Triyani Soekarso; Vivi Setiawaty                                                                                                                                                                                       |
| EPI_ISL_568692,<br>EPI_ISL_574614,<br>EPI_ISL_574616,<br>EPI_ISL_574617,<br>EPI_ISL_574618,<br>EPI_ISL_766047                                                                                                                                                                                                                                                                                                                                                                              | RS Kramat 128                                                              | Eijkman Institute for Molecular Biology, Ministry of Research and Technology/National Agency for Research and Innovation                                                                                                                                                                                                                                                                                                                                                            | Amin Soebandrio; David H Muljono; Edison Johar; Frilasita A Yudhaputri; Herawati Sudoyo; Hidayat Trimarsanto; Iskandar A Adnan; Khin Saw Myint; Safarina G Malik; Willy Agustine                                                                                                                                                                                                                                                                                                                                                           |
| EPI_ISL_2854699,<br>EPI_ISL_2854700                                                                                                                                                                                                                                                                                                                                                                                                                                                        | RS Larangan Kogabwilhan II Indrapura Sby                                   | National Institute of Health Research and Development                                                                                                                                                                                                                                                                                                                                                                                                                               | Arie Ardiansyah Nugraha; Hana Apsari Pawestri; Hartanti Dian Ikawati; Kartika Dewi Puspa; Krisna Pangesti; Nelly Puspandari; Subangkit; Triyani Soekarso; Vivi Setiawaty                                                                                                                                                                                                                                                                                                                                                                   |
| EPI_ISL_538499<br>EPI_ISL_1469254                                                                                                                                                                                                                                                                                                                                                                                                                                                          | RS Lavallete Malang East Java<br>RS Lira Medika Karawang                   | National Institute of Health Research and Development<br>National Institute of Health Research and Development                                                                                                                                                                                                                                                                                                                                                                      | AA; HA; HD; Ikawati; KD; KNA; Nugraha; Paisal; Pangesti; Pawestri; Puspa; Setiawaty, V.; Soekarso; Subangkit; T<br>Arie Ardiansyah Nugraha; Hana Apsari Pawestri; Hartanti Dian Ikawati; Kartika Dewi Puspa; Krisna Pangesti; Nelly Puspandari; Subangkit; Vivi Setiawaty                                                                                                                                                                                                                                                                  |
| EPI_ISL_833393,<br>EPI_ISL_833492                                                                                                                                                                                                                                                                                                                                                                                                                                                          | RS MMC Jakarta, Indonesia                                                  | Biosafety Level-3 Laboratory, Indonesian Institute of Sciences (LIPI)                                                                                                                                                                                                                                                                                                                                                                                                               | Ade Andriani; Ahmad Fathoni; Andri Wardiana; Anggia Prasetyoputri; Anik Budhi Dharmayanthi; Eva Erdayani; Isa Nuryana; Linda Sukmarini; Nova Dilla Yanthi; Rathif Asmana Ningrum; Syam Budi Iryanto; Yuliawati                                                                                                                                                                                                                                                                                                                             |
| EPI_ISL_833503,<br>EPI_ISL_833504,<br>EPI_ISL_833505,<br>EPI_ISL_833507                                                                                                                                                                                                                                                                                                                                                                                                                    | RS MMC, Jakarta, Indonesia                                                 | Biosafety Level-3 Laboratory, Indonesian Institute of Sciences (LIPI)                                                                                                                                                                                                                                                                                                                                                                                                               | Ade Andriani; Ahmad Fathoni; Ahmad Randy; Andri Wardiana; Anggia Prasetyoputri; Anik Budhi Dharmayanthi; Idris; Isa Nuryana; Listiana Oktavia; Muhammad Ridwan; Pangda Sopha; Rathif Asmana Ningrum; Ruby Setiawan; Syaiful Rizal; Syam Budi Iryanto                                                                                                                                                                                                                                                                                       |

|                                                                                                                                                                                                                                                                                                                                                                                                                                                                                                                                                                                                                             |                                                              |                                                                                                                          |                                                                                                                                                                                                                                                                                                                                              |
|-----------------------------------------------------------------------------------------------------------------------------------------------------------------------------------------------------------------------------------------------------------------------------------------------------------------------------------------------------------------------------------------------------------------------------------------------------------------------------------------------------------------------------------------------------------------------------------------------------------------------------|--------------------------------------------------------------|--------------------------------------------------------------------------------------------------------------------------|----------------------------------------------------------------------------------------------------------------------------------------------------------------------------------------------------------------------------------------------------------------------------------------------------------------------------------------------|
| EPI_ISL_2790724,<br>EPI_ISL_2790725,<br>EPI_ISL_2790726,<br>EPI_ISL_2790727,<br>EPI_ISL_2790728,<br>EPI_ISL_2790729                                                                                                                                                                                                                                                                                                                                                                                                                                                                                                         | RS MRCCC SILOAM SEMANGGI /<br>DINAS KESEHATAN DKI<br>JAKARTA | Genomik Solidaritas Indonesia Laboratorium                                                                               | Alfin Mohammad Abdullah; Anna Christina Brazia; Annisa Muthiah Sukirman; Anuraj Shankar; Ariel Pradipta; Carissa Sintca Wijaya; Dahilia Agustina Cahyono; Dwi Oktavia; Gracia Felias Enos Korompis; Meutia Ayuputeri Kumaheri; Ngebila Salama; Normastuti Adhni Tanty; Reinhart Gabriel; Tiranti Vindha; Vania Gavriila Wikasa; Widyastuti   |
| EPI_ISL_1469248,<br>EPI_ISL_1469253,<br>EPI_ISL_1469287,<br>EPI_ISL_2106980                                                                                                                                                                                                                                                                                                                                                                                                                                                                                                                                                 | RS Mandaya Karawang                                          | National Institute of Health Research and Development                                                                    | Arie Ardiansyah Nugraha; Hana Apsari Pawestri; Hartanti Dian Ikawati; Kartika Dewi Puspa; Krisna Pangesti; Nelly Puspandari; Subangkit; Vivi Setiawaty                                                                                                                                                                                       |
| EPI_ISL_1622373,<br>EPI_ISL_1622426                                                                                                                                                                                                                                                                                                                                                                                                                                                                                                                                                                                         | RS Mary Cileungsij Hijau                                     | Eijkman Institute for Molecular Biology, Ministry of Research and Technology/National Agency for Research and Innovation | Amin Soebandrio; Edison Johar; Frilasita A Yudhaputri; Hidayat Trimarsanto; Iskandar Adnan; Khin Saw Myint; Lydia V. Panggalo; Muhammad Rezki Rasyak; Safarina G Malik; Sukma Oktavianthi; Willy Agustine                                                                                                                                    |
| EPI_ISL_2364601,<br>EPI_ISL_2364614,<br>EPI_ISL_2364638,<br>EPI_ISL_2364641                                                                                                                                                                                                                                                                                                                                                                                                                                                                                                                                                 | RS Mary Cileungsij Hijau                                     | Eijkman Institute for Molecular Biology, National Agency for Research and Innovation                                     | Amin Soebandrio; Edison Johar; Frilasita A Yudhaputri; Hidayat Trimarsanto; Iskandar Adnan; Khin Saw Myint; Lidwina Priliani; Lydia V. Panggalo; Muhammad Rezki Rasyak; Safarina G Malik; Sukma Oktavianthi; Willy Agustine                                                                                                                  |
| EPI_ISL_2614693                                                                                                                                                                                                                                                                                                                                                                                                                                                                                                                                                                                                             | RS Mary Cileungsij Hijau                                     | Eijkman Institute for Molecular Biology, National Research and Innovation Agency                                         | Amin Soebandrio; Edison Johar; Frilasita A Yudhaputri; Hidayat Trimarsanto; Iskandar Adnan; Khin Saw Myint; Lidwina Priliani; Lydia V. Panggalo; Muhammad Rezki Rasyak; Safarina G Malik; Sukma Oktavianthi; Willy Agustine                                                                                                                  |
| EPI_ISL_1284244,<br>EPI_ISL_1284247,<br>EPI_ISL_1622389                                                                                                                                                                                                                                                                                                                                                                                                                                                                                                                                                                     | RS Masmitra                                                  | Eijkman Institute for Molecular Biology, Ministry of Research and Technology/National Agency for Research and Innovation | Amin Soebandrio; Edison Johar; Frilasita A Yudhaputri; Hidayat Trimarsanto; Iskandar Adnan; Khin Saw Myint; Lydia V. Panggalo; Muhammad Rezki Rasyak; Safarina G Malik; Sukma Oktavianthi; Willy Agustine                                                                                                                                    |
| EPI_ISL_2364575                                                                                                                                                                                                                                                                                                                                                                                                                                                                                                                                                                                                             | RS Masmitra                                                  | Eijkman Institute for Molecular Biology, National Agency for Research and Innovation                                     | Amin Soebandrio; Edison Johar; Frilasita A Yudhaputri; Hidayat Trimarsanto; Iskandar Adnan; Khin Saw Myint; Lidwina Priliani; Lydia V. Panggalo; Muhammad Rezki Rasyak; Safarina G Malik; Sukma Oktavianthi; Willy Agustine                                                                                                                  |
| EPI_ISL_2987615,<br>EPI_ISL_2987618,<br>EPI_ISL_2987619                                                                                                                                                                                                                                                                                                                                                                                                                                                                                                                                                                     | RS Mata Cicendo Bandung                                      | National Institute of Health Research and Development                                                                    | Arie Ardiansyah Nugraha; Fajar Nur Sulistiyohadi; Hana Apsari Pawestri; Hartanti Dian Ikawati; Kartika Dewi Puspa; Krisna Pangesti; Nelly Puspandari; Subangkit; Triyani Soekarso; Vivi Setiawaty                                                                                                                                            |
| EPI_ISL_4783718                                                                                                                                                                                                                                                                                                                                                                                                                                                                                                                                                                                                             | RS Mayapada Jakarta Selatan                                  | Genomik Solidaritas Indonesia Laboratorium                                                                               | Annisa Muthiah Sukirman; Anuraj Shankar; Ariel Pradipta; Benny Hosiana Tumbelaka; Carissa Sintca Wijaya; Esti Rahayuning Tias; Gracia Felias Enos Korompis; Himawan Masyhuri; Louisa Markus; Marlina; Meutia Ayuputeri Kumaheri; Shinta Vr Hutajulu; Stefanus Bernard                                                                        |
| EPI_ISL_3466023                                                                                                                                                                                                                                                                                                                                                                                                                                                                                                                                                                                                             | RS Mayapada Tangerang                                        | Eijkman Institute for Molecular Biology, National Research and Innovation Agency                                         | Amin Soebandrio; Edison Johar; Frilasita A Yudhaputri; Hidayat Trimarsanto; Iskandar Adnan; Jessica R. Saragih; Khin Saw Myint; Lidwina Priliani; Lydia V. Panggalo; Muhammad Rezki Rasyak; Safarina G Malik; Sukma Oktavianthi; Willy Agustine                                                                                              |
| EPI_ISL_1622382                                                                                                                                                                                                                                                                                                                                                                                                                                                                                                                                                                                                             | RS Medika Dramaga                                            | Eijkman Institute for Molecular Biology, Ministry of Research and Technology/National Agency for Research and Innovation | Amin Soebandrio; Edison Johar; Frilasita A Yudhaputri; Hidayat Trimarsanto; Iskandar Adnan; Khin Saw Myint; Lydia V. Panggalo; Muhammad Rezki Rasyak; Safarina G Malik; Sukma Oktavianthi; Willy Agustine                                                                                                                                    |
| EPI_ISL_2364589,<br>EPI_ISL_2364606,<br>EPI_ISL_2364607                                                                                                                                                                                                                                                                                                                                                                                                                                                                                                                                                                     | RS Medika Dramaga                                            | Eijkman Institute for Molecular Biology, National Agency for Research and Innovation                                     | Amin Soebandrio; Edison Johar; Frilasita A Yudhaputri; Hidayat Trimarsanto; Iskandar Adnan; Khin Saw Myint; Lidwina Priliani; Lydia V. Panggalo; Muhammad Rezki Rasyak; Safarina G Malik; Sukma Oktavianthi; Willy Agustine                                                                                                                  |
| EPI_ISL_1284129                                                                                                                                                                                                                                                                                                                                                                                                                                                                                                                                                                                                             | RS Medika Permata Hijau                                      | Eijkman Institute for Molecular Biology, Ministry of Research and Technology/National Agency for Research and Innovation | Amin Soebandrio; Edison Johar; Frilasita A Yudhaputri; Hidayat Trimarsanto; Iskandar Adnan; Khin Saw Myint; Lydia V. Panggalo; Safarina G Malik; Sukma Oktavianthi; Willy Agustine                                                                                                                                                           |
| EPI_ISL_2614648                                                                                                                                                                                                                                                                                                                                                                                                                                                                                                                                                                                                             | RS Medika Permata Hijau                                      | Eijkman Institute for Molecular Biology, National Research and Innovation Agency                                         | Amin Soebandrio; Edison Johar; Frilasita A Yudhaputri; Hidayat Trimarsanto; Iskandar Adnan; Khin Saw Myint; Lidwina Priliani; Lydia V. Panggalo; Muhammad Rezki Rasyak; Safarina G Malik; Sukma Oktavianthi; Willy Agustine                                                                                                                  |
| EPI_ISL_1284215, EPI_ISL_1284273, EPI_ISL_1284277, EPI_ISL_1622391, EPI_ISL_1622408, EPI_ISL_1622412, EPI_ISL_1622421, EPI_ISL_1622422                                                                                                                                                                                                                                                                                                                                                                                                                                                                                      | RS Medirossa Cikarang                                        | Eijkman Institute for Molecular Biology, Ministry of Research and Technology/National Agency for Research and Innovation | Amin Soebandrio; Edison Johar; Frilasita A Yudhaputri; Hidayat Trimarsanto; Iskandar Adnan; Khin Saw Myint; Lydia V. Panggalo; Muhammad Rezki Rasyak; Safarina G Malik; Sukma Oktavianthi; Willy Agustine                                                                                                                                    |
| EPI_ISL_2364568,<br>EPI_ISL_2364659,<br>EPI_ISL_2364663                                                                                                                                                                                                                                                                                                                                                                                                                                                                                                                                                                     | RS Medirossa Cikarang                                        | Eijkman Institute for Molecular Biology, National Agency for Research and Innovation                                     | Amin Soebandrio; Edison Johar; Frilasita A Yudhaputri; Hidayat Trimarsanto; Iskandar Adnan; Khin Saw Myint; Lidwina Priliani; Lydia V. Panggalo; Muhammad Rezki Rasyak; Safarina G Malik; Sukma Oktavianthi; Willy Agustine                                                                                                                  |
| EPI_ISL_2614667,<br>EPI_ISL_2614671,<br>EPI_ISL_2614688,<br>EPI_ISL_2614689,<br>EPI_ISL_2614711                                                                                                                                                                                                                                                                                                                                                                                                                                                                                                                             | RS Medirossa Cikarang                                        | Eijkman Institute for Molecular Biology, National Research and Innovation Agency                                         | Amin Soebandrio; Edison Johar; Frilasita A Yudhaputri; Hidayat Trimarsanto; Iskandar Adnan; Khin Saw Myint; Lidwina Priliani; Lydia V. Panggalo; Muhammad Rezki Rasyak; Safarina G Malik; Sukma Oktavianthi; Willy Agustine                                                                                                                  |
| EPI_ISL_2918613                                                                                                                                                                                                                                                                                                                                                                                                                                                                                                                                                                                                             | RS Medistra                                                  | Eijkman Institute for Molecular Biology, National Research and Innovation Agency                                         | Amin Soebandrio; Edison Johar; Frilasita A Yudhaputri; Hidayat Trimarsanto; Iskandar Adnan; Khin Saw Myint; Lidwina Priliani; Lydia V. Panggalo; Muhammad Rezki Rasyak; Safarina G Malik; Sukma Oktavianthi; Willy Agustine                                                                                                                  |
| EPI_ISL_833509,<br>EPI_ISL_833510                                                                                                                                                                                                                                                                                                                                                                                                                                                                                                                                                                                           | RS Melania, Bogor, Indonesia                                 | Biosafety Level-3 Laboratory, Indonesian Institute of Sciences (LIPI)                                                    | Ade Andriani; Ahmad Fathoni; Andri Wardiana; Anggia Prasetyoputri; Anik Budhi Dharmayanthi; Isa Nuryana; Rathil Asmana Ningrum; Syam Budi Iryanto                                                                                                                                                                                            |
| EPI_ISL_5022905,<br>EPI_ISL_5022906                                                                                                                                                                                                                                                                                                                                                                                                                                                                                                                                                                                         | RS Metta Medika II Sibolga                                   | National Institute of Health Research and Development                                                                    | Arie Ardiansyah Nugraha; Fajar Nur Sulistiyohadi; Hana Apsari Pawestri; Hartanti Dian Ikawati; Kartika Dewi Puspa; Krisna Pangesti; Nelly Puspandari; Subangkit; Triyani Soekarso; Vivi Setiawaty                                                                                                                                            |
| EPI_ISL_889016                                                                                                                                                                                                                                                                                                                                                                                                                                                                                                                                                                                                              | RS Mitra Husada                                              | Eijkman Institute for Molecular Biology, Ministry of Research and Technology/National Agency for Research and Innovation | Amin Soebandrio; Edison Johar; Frilasita A Yudhaputri; Hidayat Trimarsanto; Iskandar Adnan; Khin Saw Myint; Lydia V. Panggalo; Safarina G Malik; Sukma Oktavianthi; Willy Agustine                                                                                                                                                           |
| EPI_ISL_1284210                                                                                                                                                                                                                                                                                                                                                                                                                                                                                                                                                                                                             | RS Mitra Husada Pringsewu                                    | Eijkman Institute for Molecular Biology, Ministry of Research and Technology/National Agency for Research and Innovation | Amin Soebandrio; Edison Johar; Frilasita A Yudhaputri; Hidayat Trimarsanto; Iskandar Adnan; Khin Saw Myint; Lydia V. Panggalo; Safarina G Malik; Sukma Oktavianthi; Willy Agustine                                                                                                                                                           |
| EPI_ISL_1284105                                                                                                                                                                                                                                                                                                                                                                                                                                                                                                                                                                                                             | RS Mitra Husada Tangerang                                    | Eijkman Institute for Molecular Biology, Ministry of Research and Technology/National Agency for Research and Innovation | Amin Soebandrio; Edison Johar; Frilasita A Yudhaputri; Hidayat Trimarsanto; Iskandar Adnan; Khin Saw Myint; Lydia V. Panggalo; Safarina G Malik; Sukma Oktavianthi; Willy Agustine                                                                                                                                                           |
| EPI_ISL_2614710                                                                                                                                                                                                                                                                                                                                                                                                                                                                                                                                                                                                             | RS Mitra Husada Tangerang                                    | Eijkman Institute for Molecular Biology, National Research and Innovation Agency                                         | Amin Soebandrio; Edison Johar; Frilasita A Yudhaputri; Hidayat Trimarsanto; Iskandar Adnan; Khin Saw Myint; Lidwina Priliani; Lydia V. Panggalo; Muhammad Rezki Rasyak; Safarina G Malik; Sukma Oktavianthi; Willy Agustine                                                                                                                  |
| EPI_ISL_3070963                                                                                                                                                                                                                                                                                                                                                                                                                                                                                                                                                                                                             | RS Mitra Kasih                                               | Eijkman Institute for Molecular Biology, National Research and Innovation Agency; West Java Health Laboratory            | Amin Soebandrio; Azzania Fibrilani; Cut Nur Cinthia Alamanda; Edison Johar; Ema Rahmawati; Frilasita A Yudhaputri; Hidayat Trimarsanto; Iskandar Adnan; Khin Saw Myint; Lidwina Priliani; Lydia V. Panggalo; Muhammad Rezki Rasyak; Rifky Waluyajati Rachman; Ryan Bayusantika Ristandi; Safarina G Malik; Sukma Oktavianthi; Willy Agustine |
| EPI_ISL_2987600,<br>EPI_ISL_2987602                                                                                                                                                                                                                                                                                                                                                                                                                                                                                                                                                                                         | RS Mitra Keluarga                                            | National Institute of Health Research and Development                                                                    | Arie Ardiansyah Nugraha; Fajar Nur Sulistiyohadi; Hana Apsari Pawestri; Hartanti Dian Ikawati; Kartika Dewi Puspa; Krisna Pangesti; Nelly Puspandari; Subangkit; Triyani Soekarso; Vivi Setiawaty                                                                                                                                            |
| EPI_ISL_1284269                                                                                                                                                                                                                                                                                                                                                                                                                                                                                                                                                                                                             | RS Mitra Keluarga Bekasi Barat                               | Eijkman Institute for Molecular Biology, Ministry of Research and Technology/National Agency for Research and Innovation | Amin Soebandrio; Edison Johar; Frilasita A Yudhaputri; Hidayat Trimarsanto; Iskandar Adnan; Khin Saw Myint; Lydia V. Panggalo; Safarina G Malik; Sukma Oktavianthi; Willy Agustine                                                                                                                                                           |
| EPI_ISL_2364632                                                                                                                                                                                                                                                                                                                                                                                                                                                                                                                                                                                                             | RS Mitra Keluarga Bekasi Barat                               | Eijkman Institute for Molecular Biology, National Agency for Research and Innovation                                     | Amin Soebandrio; Edison Johar; Frilasita A Yudhaputri; Hidayat Trimarsanto; Iskandar Adnan; Khin Saw Myint; Lidwina Priliani; Lydia V. Panggalo; Muhammad Rezki Rasyak; Safarina G Malik; Sukma Oktavianthi; Willy Agustine                                                                                                                  |
| EPI_ISL_766034,<br>EPI_ISL_766036,<br>EPI_ISL_889009                                                                                                                                                                                                                                                                                                                                                                                                                                                                                                                                                                        | RS Mitra Keluarga Bintaro                                    | Eijkman Institute for Molecular Biology, Ministry of Research and Technology/National Agency for Research and Innovation | Amin Soebandrio; David H Muljono; Edison Johar; Frilasita A Yudhaputri; Hidayat Trimarsanto; Iskandar Adnan; Khin Saw Myint; Lydia V. Panggalo; Safarina G Malik; Sukma Oktavianthi; Willy Agustine                                                                                                                                          |
| EPI_ISL_2614721                                                                                                                                                                                                                                                                                                                                                                                                                                                                                                                                                                                                             | RS Mitra Keluarga Bintaro                                    | Eijkman Institute for Molecular Biology, National Research and Innovation Agency                                         | Amin Soebandrio; Edison Johar; Frilasita A Yudhaputri; Hidayat Trimarsanto; Iskandar Adnan; Khin Saw Myint; Lidwina Priliani; Lydia V. Panggalo; Muhammad Rezki Rasyak; Safarina G Malik; Sukma Oktavianthi; Willy Agustine                                                                                                                  |
| EPI_ISL_888999,<br>EPI_ISL_947301,<br>EPI_ISL_1284207                                                                                                                                                                                                                                                                                                                                                                                                                                                                                                                                                                       | RS Mitra Keluarga Cibubur                                    | Eijkman Institute for Molecular Biology, Ministry of Research and Technology/National Agency for Research and Innovation | Amin Soebandrio; Edison Johar; Frilasita A Yudhaputri; Hidayat Trimarsanto; Iskandar Adnan; Khin Saw Myint; Lydia V. Panggalo; Safarina G Malik; Sukma Oktavianthi; Willy Agustine                                                                                                                                                           |
| EPI_ISL_2364579,<br>EPI_ISL_2364600                                                                                                                                                                                                                                                                                                                                                                                                                                                                                                                                                                                         | RS Mitra Keluarga Cibubur                                    | Eijkman Institute for Molecular Biology, National Agency for Research and Innovation                                     | Amin Soebandrio; Edison Johar; Frilasita A Yudhaputri; Hidayat Trimarsanto; Iskandar Adnan; Khin Saw Myint; Lidwina Priliani; Lydia V. Panggalo; Muhammad Rezki Rasyak; Safarina G Malik; Sukma Oktavianthi; Willy Agustine                                                                                                                  |
| EPI_ISL_3029941,<br>EPI_ISL_3029942,<br>EPI_ISL_3029995,<br>EPI_ISL_3029999                                                                                                                                                                                                                                                                                                                                                                                                                                                                                                                                                 | RS Mitra Keluarga Cibubur                                    | Eijkman Institute for Molecular Biology, National Research and Innovation Agency                                         | Amin Soebandrio; Edison Johar; Frilasita A Yudhaputri; Hidayat Trimarsanto; Iskandar Adnan; Khin Saw Myint; Lidwina Priliani; Lydia V. Panggalo; Muhammad Rezki Rasyak; Safarina G Malik; Sukma Oktavianthi; Willy Agustine                                                                                                                  |
| EPI_ISL_2013045                                                                                                                                                                                                                                                                                                                                                                                                                                                                                                                                                                                                             | RS Mitra Keluarga Cikarang                                   | Eijkman Institute for Molecular Biology, National Agency for Research and Innovation                                     | Amin Soebandrio; Edison Johar; Frilasita A Yudhaputri; Hidayat Trimarsanto; Iskandar Adnan; Khin Saw Myint; Lydia V. Panggalo; Muhammad Rezki Rasyak; Safarina G Malik; Sukma Oktavianthi; Willy Agustine                                                                                                                                    |
| EPI_ISL_947328                                                                                                                                                                                                                                                                                                                                                                                                                                                                                                                                                                                                              | RS Mitra Keluarga Depok                                      | Eijkman Institute for Molecular Biology, Ministry of Research and Technology/National Agency for Research and Innovation | Amin Soebandrio; Edison Johar; Frilasita A Yudhaputri; Hidayat Trimarsanto; Iskandar Adnan; Khin Saw Myint; Lydia V. Panggalo; Safarina G Malik; Sukma Oktavianthi; Willy Agustine                                                                                                                                                           |
| EPI_ISL_888991, EPI_ISL_888992, EPI_ISL_889003, EPI_ISL_889004, EPI_ISL_947270, EPI_ISL_947326, EPI_ISL_947327, EPI_ISL_1283933, EPI_ISL_1283941, EPI_ISL_1283945, EPI_ISL_1283949, EPI_ISL_1283953, EPI_ISL_1283964, EPI_ISL_1283982, EPI_ISL_1283984, EPI_ISL_1284007, EPI_ISL_1284008, EPI_ISL_1284021, EPI_ISL_1284025, EPI_ISL_1284063, EPI_ISL_1284133, EPI_ISL_1284136, EPI_ISL_1284251, EPI_ISL_1284254, EPI_ISL_1284307, EPI_ISL_1622360, EPI_ISL_1622361, EPI_ISL_1622371, EPI_ISL_1622372, EPI_ISL_1622379, EPI_ISL_1622380, EPI_ISL_1622388, EPI_ISL_1622413, EPI_ISL_1622428, EPI_ISL_1622429, EPI_ISL_1622430 | RS Mitra Keluarga Gading Serpong                             | Eijkman Institute for Molecular Biology, Ministry of Research and Technology/National Agency for Research and Innovation | Amin Soebandrio; Edison Johar; Frilasita A Yudhaputri; Hidayat Trimarsanto; Iskandar Adnan; Khin Saw Myint; Lydia V. Panggalo; Muhammad Rezki Rasyak; Safarina G Malik; Sukma Oktavianthi; Willy Agustine                                                                                                                                    |
| EPI_ISL_2364587,<br>EPI_ISL_2364588,<br>EPI_ISL_2364592,<br>EPI_ISL_2364603,<br>EPI_ISL_2364616,<br>EPI_ISL_2364617                                                                                                                                                                                                                                                                                                                                                                                                                                                                                                         | RS Mitra Keluarga Gading Serpong                             | Eijkman Institute for Molecular Biology, National Agency for Research and Innovation                                     | Amin Soebandrio; Edison Johar; Frilasita A Yudhaputri; Hidayat Trimarsanto; Iskandar Adnan; Khin Saw Myint; Lidwina Priliani; Lydia V. Panggalo; Muhammad Rezki Rasyak; Safarina G Malik; Sukma Oktavianthi; Willy Agustine                                                                                                                  |

|                                                                                                                                                                                                                                                               |                                                       |                                  |                                                                                                                                                                                                                                                                                                                                                                                                                                                        |                                                                                                                                                                                                                                                                                                                                                                                                                                                                                                                                                                                                                                       |
|---------------------------------------------------------------------------------------------------------------------------------------------------------------------------------------------------------------------------------------------------------------|-------------------------------------------------------|----------------------------------|--------------------------------------------------------------------------------------------------------------------------------------------------------------------------------------------------------------------------------------------------------------------------------------------------------------------------------------------------------------------------------------------------------------------------------------------------------|---------------------------------------------------------------------------------------------------------------------------------------------------------------------------------------------------------------------------------------------------------------------------------------------------------------------------------------------------------------------------------------------------------------------------------------------------------------------------------------------------------------------------------------------------------------------------------------------------------------------------------------|
| EPI_ISL_2614650, EPI_ISL_2614651, EPI_ISL_2614661, EPI_ISL_2614662, EPI_ISL_2614668, EPI_ISL_2614675, EPI_ISL_2614701, EPI_ISL_2614702, EPI_ISL_2614703, EPI_ISL_2614712, EPI_ISL_2614717, EPI_ISL_2614718, EPI_ISL_3070859, EPI_ISL_3465996                  | see above                                             | RS Mitra Keluarga Gading Serpong | Eijkman Institute for Molecular Biology, National Research and Innovation Agency                                                                                                                                                                                                                                                                                                                                                                       | Amin Soebandrio; Edison Johar; Frilasita A Yudhaputri; Hidayat Trimarsanto; Iskandar Adnan; Jessica R. Saragih; Khin Saw Myint; Lidwina Priliani; Lydia V. Panggalo; Muhammad Rezki Rasyak; Safarina G Malik; Sukma Oktavianthi; Willy Agustine                                                                                                                                                                                                                                                                                                                                                                                       |
| EPI_ISL_1283998, EPI_ISL_1284017, EPI_ISL_1284101, EPI_ISL_1284163, EPI_ISL_1284165, EPI_ISL_1284219, EPI_ISL_1284223, EPI_ISL_1284284, EPI_ISL_1284288, EPI_ISL_1284292, EPI_ISL_1284314, EPI_ISL_1284327, EPI_ISL_1284331, EPI_ISL_1284335, EPI_ISL_1622409 | see above                                             | RS Mitra Keluarga Kalideres      | Eijkman Institute for Molecular Biology, Ministry of Research and Technology/National Agency for Research and Innovation                                                                                                                                                                                                                                                                                                                               | Amin Soebandrio; Edison Johar; Frilasita A Yudhaputri; Hidayat Trimarsanto; Iskandar Adnan; Khin Saw Myint; Lydia V. Panggalo; Muhammad Rezki Rasyak; Safarina G Malik; Sukma Oktavianthi; Willy Agustine                                                                                                                                                                                                                                                                                                                                                                                                                             |
| EPI_ISL_2364610, EPI_ISL_2617493                                                                                                                                                                                                                              | RS Mitra Keluarga Kalideres                           |                                  | Eijkman Institute for Molecular Biology, National Agency for Research and Innovation                                                                                                                                                                                                                                                                                                                                                                   | Amin Soebandrio; Edison Johar; Frilasita A Yudhaputri; Hidayat Trimarsanto; Iskandar Adnan; Khin Saw Myint; Lidwina Priliani; Lydia V. Panggalo; Muhammad Rezki Rasyak; Safarina G Malik; Sukma Oktavianthi; Willy Agustine                                                                                                                                                                                                                                                                                                                                                                                                           |
| EPI_ISL_574608, EPI_ISL_947322, EPI_ISL_1283929, EPI_ISL_1283994, EPI_ISL_1622425                                                                                                                                                                             | RS Mitra Keluarga Kelapa Gading                       |                                  | Eijkman Institute for Molecular Biology, Ministry of Research and Technology/National Agency for Research and Innovation                                                                                                                                                                                                                                                                                                                               | Arie Ardiansyah Nugraha; Hana Aparsi Pawestri; Hartanti Dian Ikawati; Kartika Dewi Puspa; Krisna Pangesti; Nelly Puspandari; Subangkit; Triyani Soekarso; Vivi Setiawaty                                                                                                                                                                                                                                                                                                                                                                                                                                                              |
| EPI_ISL_2013047, EPI_ISL_2364596, EPI_ISL_2364618, EPI_ISL_2364619                                                                                                                                                                                            | RS Mitra Keluarga Kelapa Gading                       |                                  | Eijkman Institute for Molecular Biology, National Agency for Research and Innovation                                                                                                                                                                                                                                                                                                                                                                   | Amin Soebandrio; Edison Johar; Frilasita A Yudhaputri; Hidayat Trimarsanto; Iskandar Adnan; Khin Saw Myint; Lidwina Priliani; Lydia V. Panggalo; Muhammad Rezki Rasyak; Safarina G Malik; Sukma Oktavianthi; Willy Agustine                                                                                                                                                                                                                                                                                                                                                                                                           |
| EPI_ISL_2614656, EPI_ISL_2614657, EPI_ISL_2614666, EPI_ISL_2614676                                                                                                                                                                                            | RS Mitra Keluarga Kelapa Gading                       |                                  | Eijkman Institute for Molecular Biology, National Research and Innovation Agency                                                                                                                                                                                                                                                                                                                                                                       | Amin Soebandrio; Edison Johar; Frilasita A Yudhaputri; Hidayat Trimarsanto; Iskandar Adnan; Khin Saw Myint; Lidwina Priliani; Lydia V. Panggalo; Muhammad Rezki Rasyak; Safarina G Malik; Sukma Oktavianthi; Willy Agustine                                                                                                                                                                                                                                                                                                                                                                                                           |
| EPI_ISL_3030001, EPI_ISL_889012, EPI_ISL_1284067, EPI_ISL_1284197                                                                                                                                                                                             | RS Mitra Keluarga Kemayoran                           |                                  | Eijkman Institute for Molecular Biology, National Research and Innovation Agency                                                                                                                                                                                                                                                                                                                                                                       | Amin Soebandrio; Edison Johar; Frilasita A Yudhaputri; Hidayat Trimarsanto; Iskandar Adnan; Khin Saw Myint; Lidwina Priliani; Lydia V. Panggalo; Muhammad Rezki Rasyak; Safarina G Malik; Sukma Oktavianthi; Willy Agustine                                                                                                                                                                                                                                                                                                                                                                                                           |
| EPI_ISL_889012, EPI_ISL_1284067, EPI_ISL_1284197                                                                                                                                                                                                              | RS Mitra Keluarga Pratama Jatiasih                    |                                  | Eijkman Institute for Molecular Biology, Ministry of Research and Technology/National Agency for Research and Innovation                                                                                                                                                                                                                                                                                                                               | Amin Soebandrio; Edison Johar; Frilasita A Yudhaputri; Hidayat Trimarsanto; Iskandar Adnan; Khin Saw Myint; Lydia V. Panggalo; Safarina G Malik; Sukma Oktavianthi; Willy Agustine                                                                                                                                                                                                                                                                                                                                                                                                                                                    |
| EPI_ISL_2617512                                                                                                                                                                                                                                               | RS Mitra Kemayoran                                    |                                  | National Institute of Health Research and Development                                                                                                                                                                                                                                                                                                                                                                                                  | Arie Ardiansyah Nugraha; Hana Aparsi Pawestri; Hartanti Dian Ikawati; Kartika Dewi Puspa; Krisna Pangesti; Nelly Puspandari; Subangkit; Triyani Soekarso; Vivi Setiawaty                                                                                                                                                                                                                                                                                                                                                                                                                                                              |
| EPI_ISL_3030050, EPI_ISL_3030051                                                                                                                                                                                                                              | RS Muhammadiyah Bandung, Dinas Kesehatan Kota Bandung |                                  | Eijkman Institute for Molecular Biology, National Research and Innovation Agency; West Java Health Laboratory                                                                                                                                                                                                                                                                                                                                          | Ade Fany Safftri; Amin Soebandrio; Azzania Fibrini; Cut Nur Cinthia Alamanda; Edison Johar; Ema Rahmawati; Frilasita A Yudhaputri; Hidayat Trimarsanto; Husna Nugrahapraja; Iskandar Adnan; Khin Saw Myint; Lidwina Priliani; Lydia V. Panggalo; Muhammad Rezki Rasyak; Ranza Fadhill Pratama; Rifky Waluyajati Rachman; Ryan Bayusantika Ristandi; Safarina G Malik; Sukma Oktavianthi; Tati Sutarti Sastrowiyoto; Willy Agustine                                                                                                                                                                                                    |
| EPI_ISL_1284258                                                                                                                                                                                                                                               | RS Mulia Pajajaran                                    |                                  | Eijkman Institute for Molecular Biology, Ministry of Research and Technology/National Agency for Research and Innovation                                                                                                                                                                                                                                                                                                                               | Amin Soebandrio; Edison Johar; Frilasita A Yudhaputri; Hidayat Trimarsanto; Iskandar Adnan; Khin Saw Myint; Lydia V. Panggalo; Safarina G Malik; Sukma Oktavianthi; Willy Agustine                                                                                                                                                                                                                                                                                                                                                                                                                                                    |
| EPI_ISL_1283932, EPI_ISL_1284266                                                                                                                                                                                                                              | RS Mulya Tangerang                                    |                                  | Eijkman Institute for Molecular Biology, Ministry of Research and Technology/National Agency for Research and Innovation                                                                                                                                                                                                                                                                                                                               | Amin Soebandrio; Edison Johar; Frilasita A Yudhaputri; Hidayat Trimarsanto; Iskandar Adnan; Khin Saw Myint; Lydia V. Panggalo; Safarina G Malik; Sukma Oktavianthi; Willy Agustine                                                                                                                                                                                                                                                                                                                                                                                                                                                    |
| EPI_ISL_1284031, EPI_ISL_1284262                                                                                                                                                                                                                              | RS OMNI Alam Sutera                                   |                                  | Eijkman Institute for Molecular Biology, Ministry of Research and Technology/National Agency for Research and Innovation                                                                                                                                                                                                                                                                                                                               | Amin Soebandrio; Edison Johar; Frilasita A Yudhaputri; Hidayat Trimarsanto; Iskandar Adnan; Khin Saw Myint; Lydia V. Panggalo; Safarina G Malik; Sukma Oktavianthi; Willy Agustine                                                                                                                                                                                                                                                                                                                                                                                                                                                    |
| EPI_ISL_1622427                                                                                                                                                                                                                                               | RS OMNI Pulomas                                       |                                  | Eijkman Institute for Molecular Biology, Ministry of Research and Technology/National Agency for Research and Innovation                                                                                                                                                                                                                                                                                                                               | Amin Soebandrio; Edison Johar; Frilasita A Yudhaputri; Hidayat Trimarsanto; Iskandar Adnan; Khin Saw Myint; Lydia V. Panggalo; Muhammad Rezki Rasyak; Safarina G Malik; Sukma Oktavianthi; Willy Agustine                                                                                                                                                                                                                                                                                                                                                                                                                             |
| EPI_ISL_2614719, EPI_ISL_2709359, EPI_ISL_2709360, EPI_ISL_2709378, EPI_ISL_2709383, EPI_ISL_2709389, EPI_ISL_2709390, EPI_ISL_2709395, EPI_ISL_2811830, EPI_ISL_2811831, EPI_ISL_2811832                                                                     | see above                                             | RS OMNI Pulomas                  | Eijkman Institute for Molecular Biology, National Research and Innovation Agency                                                                                                                                                                                                                                                                                                                                                                       | Amin Soebandrio; Edison Johar; Frilasita A Yudhaputri; Hidayat Trimarsanto; Iskandar Adnan; Khin Saw Myint; Lidwina Priliani; Lydia V. Panggalo; Muhammad Rezki Rasyak; Safarina G Malik; Sukma Oktavianthi; Willy Agustine                                                                                                                                                                                                                                                                                                                                                                                                           |
| EPI_ISL_889020                                                                                                                                                                                                                                                | RS OMni Cikarang                                      |                                  | Eijkman Institute for Molecular Biology, Ministry of Research and Technology/National Agency for Research and Innovation                                                                                                                                                                                                                                                                                                                               | Amin Soebandrio; Edison Johar; Frilasita A Yudhaputri; Hidayat Trimarsanto; Iskandar Adnan; Khin Saw Myint; Lydia V. Panggalo; Safarina G Malik; Sukma Oktavianthi; Willy Agustine                                                                                                                                                                                                                                                                                                                                                                                                                                                    |
| EPI_ISL_888981, EPI_ISL_1284002                                                                                                                                                                                                                               | RS OMni Pulomas                                       |                                  | Eijkman Institute for Molecular Biology, Ministry of Research and Technology/National Agency for Research and Innovation                                                                                                                                                                                                                                                                                                                               | Amin Soebandrio; Edison Johar; Frilasita A Yudhaputri; Hidayat Trimarsanto; Iskandar Adnan; Khin Saw Myint; Lydia V. Panggalo; Safarina G Malik; Sukma Oktavianthi; Willy Agustine                                                                                                                                                                                                                                                                                                                                                                                                                                                    |
| EPI_ISL_2723600, EPI_ISL_2723601, EPI_ISL_2723602, EPI_ISL_2723603, EPI_ISL_2723604                                                                                                                                                                           | RS PELNI                                              |                                  | Genomik Solidaritas Indonesia Laboratorium                                                                                                                                                                                                                                                                                                                                                                                                             | Alfin Mohammad Abdillah; Annisa Muthiah Sukirman; Anuraj Shankar; Ariel Pradipta; Carissa Sintca Wijaya; Dhahlia Agustina Cahyono; Dwi Oktavia; Gracia Felias Enos Korompis; Meutia Ayuputeri Kumaheri; Mohammad Anang Syarifudin; Ngabila Salama; Normastuti Adhini Tantyto; Tiranti Vindhra; Vania Gavrla Wikasa; Widyastuti                                                                                                                                                                                                                                                                                                        |
| EPI_ISL_3836266                                                                                                                                                                                                                                               | RS PLUIT                                              |                                  | Genomik Solidaritas Indonesia Laboratorium                                                                                                                                                                                                                                                                                                                                                                                                             | Anna Christina Brazia; Annisa Muthiah Sukirman; Anuraj Shankar; Ariel Pradipta; David Hendra Haryanto; Dhahlia Agustina Cahyono; Dwi Oktavia; Eko Susanti; Gracia Felias Enos Korompis; Louisa Markus; Meutia Ayuputeri Kumaheri; Ngabila Salama; Pratiwi Srikandi Yudhastari; Reinhart Gabriel; Tiranti Vindhra; Vania Gavrla Wikasa                                                                                                                                                                                                                                                                                                 |
| EPI_ISL_833493, EPI_ISL_833494, EPI_ISL_833496                                                                                                                                                                                                                | RS PMI Bogor, Indonesia                               |                                  | Biosafety Level-3 Laboratory, Indonesian Institute of Sciences (LIPI)                                                                                                                                                                                                                                                                                                                                                                                  | Ade Andriani; Ahmad Fathoni; Andri Wardiana; Anggia Prasetyoputri; Anik Budhi Dharmayanthi; Anky Zannati; Ari Wulandari; Indriawati; Isa Nuryana; Maritsa Nurfatwa; Nurulliatwy; Rathin Asmana Ningrum; Syam Budi Iryanto; Yana Rubiyana                                                                                                                                                                                                                                                                                                                                                                                              |
| EPI_ISL_833506                                                                                                                                                                                                                                                | RS PMI, Bogor, Indonesia                              |                                  | Biosafety Level-3 Laboratory, Indonesian Institute of Sciences (LIPI)                                                                                                                                                                                                                                                                                                                                                                                  | Ade Andriani; Ahmad Fathoni; Andri Wardiana; Anggia Prasetyoputri; Anik Budhi Dharmayanthi; Gilang Akbariani; Isa Nuryana; Rathin Asmana Ningrum; Satrio Haryo Benowo; Syam Budi Iryanto                                                                                                                                                                                                                                                                                                                                                                                                                                              |
| EPI_ISL_1020175, EPI_ISL_1020180, EPI_ISL_1020184, EPI_ISL_1020193, EPI_ISL_1020196, EPI_ISL_1117451, EPI_ISL_1117589, EPI_ISL_1137601, EPI_ISL_2840894, EPI_ISL_2844815, EPI_ISL_2844822, EPI_ISL_2844825, EPI_ISL_2844827, EPI_ISL_2844828, EPI_ISL_2844831 | see above                                             | RS PMI, Bogor, West Java         | Biosafety Level-3 Laboratory, Indonesian Institute of Sciences (LIPI)                                                                                                                                                                                                                                                                                                                                                                                  | Ade Andriani; Afifi T. Fathurahman; Andri Wardiana; Anggia Prasetyoputri; Anik B. Dharmayanthi; Anik Budhi Dharmayanthi; Ari S. Wulandari; Asep M. Ridwanulloh; Asep M. Ridwanulloh; Eko Wahyu Putro; Eko Wahyu Putro; Erwin F. Hasrianda; Fahrurrozi; Gita Syahputra; Hariyunto; Herjuno A. Nugroho; Idris; Indriawati; Inswasti Cahyani; Isa Nuryana; Linda Sukmarini; Listiana Oktavia; Matthew W. Loose; Mohammad Ilyas; Nova D. Yanthi; Puspita Lisdianti; Rathin A. Ningrum; Rathin Asmana Ningrum; Sri Swasthikawati; Sugiyono Saputra; Susanti; Syaiful Rizal; Syam B. Iryanto; Syam Budi Iryanto; Wren Kusharyoto; Yuliawati |
| EPI_ISL_4106123, EPI_ISL_4106127                                                                                                                                                                                                                              | RS PMI, Bogor, West Java                              |                                  | National Research and Innovation Agency (BRIN-Indonesia, VenomCoV Project Team)                                                                                                                                                                                                                                                                                                                                                                        | Andri Wardiana; Anggia Prasetyoputri; Erwin F. Hasrianda; Fahrurrozi; Herjuno A. Nugroho; Nova D. Yanthi; Sugiyono Saputra; Syam B. Iryanto                                                                                                                                                                                                                                                                                                                                                                                                                                                                                           |
| EPI_ISL_2943230                                                                                                                                                                                                                                               | RS Pantir Rapih                                       |                                  | Genetics Working Group (Pokja Genetik) Faculty of Medicine, Public Health and Nursing Universitas Gadjah Mada (FK-KMK UGM); Disease Investigation Center Wates Ministry of Agriculture Indonesia; Department of Microbiology FK-KMK UGM; Laboratorium Diagnostik Yayasan Tahjia World Mosquito Program (WMP) Yogyakarta Center for Tropical Medicine FK-KMK UGM; Integrated Research Center FK-KMK UGM; Department of Computer Science and Electronics | Afiahayati; Alvina A Setiawan; Dwi AA Nugrahaningsih; Dwi Indaryati; Edwin W. Daniwijaya; Eggi Arguni; Endah Supriyati; Gunadi; Hendra Wibawa; Indarto Sulistyono; Khanza a Vujira; Kristy Iskandar; Ludhang P. Rizki; Marcellus; Mohamad S. Hakim; Nungki Anggorowati; Pramesti G Dewi; Siswanto; Titik Nuryastuti; Tri Wibawa                                                                                                                                                                                                                                                                                                       |
| EPI_ISL_2943232                                                                                                                                                                                                                                               | RS Pantir Rapih                                       |                                  | Genetics Working Group (Pokja Genetik) Faculty of Medicine, Public Health and Nursing Universitas Gadjah Mada (FK-KMK UGM); Disease Investigation Center Wates Ministry of Agriculture Indonesia; Department of Microbiology FK-KMK UGM; Laboratorium Diagnostik Yayasan Tahjia World Mosquito Program (WMP) Yogyakarta Center for Tropical Medicine FK-KMK UGM; Integrated Research Center FK-KMK UGM; Department of Computer Science and Electronics | Afiahayati; Alvina A Setiawan; Cita S Amalia; Dwi AA Nugrahaningsih; Dwi Indaryati; Edwin W. Daniwijaya; Eggi Arguni; Endah Supriyati; Gunadi; Hendra Wibawa; Indarto Sulistyono; Kristy Iskandar; Ludhang P. Rizki; Marcellus; Mohamad S. Hakim; Nungki Anggorowati; Pramesti G Dewi; Siswanto; Titik Nuryastuti; Tri Wibawa                                                                                                                                                                                                                                                                                                         |
| EPI_ISL_610158                                                                                                                                                                                                                                                | RS Pantir Rini                                        |                                  | Genetics Working Group (Pokja Genetik) Faculty of Medicine, Public Health and Nursing Universitas Gadjah Mada (FK-KMK UGM); Disease Investigation Center Wates Ministry of Agriculture Indonesia; Department of Microbiology FK-KMK UGM; Laboratorium Diagnostik Yayasan Tahjia World Mosquito Program (WMP) Yogyakarta Center for Tropical Medicine FK-KMK UGM; Integrated Research Center FK-KMK UGM; Department of Computer Science and Electronics | Afiahayati; Dwi AA Nugrahaningsih; Dwiki Afandy; Dyah Ayu Puspitarani; Edwin W. Daniwijaya; Eggi Arguni; Endah Supriyati; Gunadi; Hendra Wibawa; Kristy Iskandar; Ludhang P. Rizki; Marcellus; Mohamad S. Hakim; Nungki Anggorowati; Siswanto; Titik Nuryastuti; Tri Wibawa; V. Noegroho Isti Donodjati; Wawan Triharjanto                                                                                                                                                                                                                                                                                                            |
| EPI_ISL_763063                                                                                                                                                                                                                                                | RS Pantir Waluyo, Surakarta                           |                                  | Universitas Sebelas Maret (UNS); Rumah Sakit UNS (RS-UNS); National Institute of Health Research and Development, Indonesian Ministry of Health.                                                                                                                                                                                                                                                                                                       | Afif A Ghufroon; Arie A Nugraha; Betty Suryawati; Dewi Puspa; Hana A Pawestri; Hartanti Dian Ika; Hartono; Kartika; Maryani; Revi G H Novika; Vivi Setiawaty; Yulia Sari                                                                                                                                                                                                                                                                                                                                                                                                                                                              |
| EPI_ISL_568688, EPI_ISL_766043, EPI_ISL_766045                                                                                                                                                                                                                | RS Peln                                               |                                  | Eijkman Institute for Molecular Biology, Ministry of Research and Technology/National Agency for Research and Innovation                                                                                                                                                                                                                                                                                                                               | Amin Soebandrio; David H Muljono; Edison Johar; Frilasita A Yudhaputri; Herawati Sudoyo; Hidayat Trimarsanto; Iskandar A Adnan; Khin Saw Myint; Safarina G Malik; Willy Agustine                                                                                                                                                                                                                                                                                                                                                                                                                                                      |
| EPI_ISL_2614725, EPI_ISL_2614726, EPI_ISL_2614727, EPI_ISL_2614731, EPI_ISL_2709366, EPI_ISL_2709367, EPI_ISL_2709368, EPI_ISL_2709382, EPI_ISL_3029940                                                                                                       | see above                                             | RS Peln                          | Eijkman Institute for Molecular Biology, National Research and Innovation Agency                                                                                                                                                                                                                                                                                                                                                                       | Amin Soebandrio; Edison Johar; Frilasita A Yudhaputri; Hidayat Trimarsanto; Iskandar Adnan; Khin Saw Myint; Lidwina Priliani; Lydia V. Panggalo; Muhammad Rezki Rasyak; Safarina G Malik; Sukma Oktavianthi; Willy Agustine                                                                                                                                                                                                                                                                                                                                                                                                           |
| EPI_ISL_2364577                                                                                                                                                                                                                                               | RS Permata Bekasi                                     |                                  | Eijkman Institute for Molecular Biology, National Agency for Research and Innovation                                                                                                                                                                                                                                                                                                                                                                   | Amin Soebandrio; Edison Johar; Frilasita A Yudhaputri; Hidayat Trimarsanto; Iskandar Adnan; Khin Saw Myint; Lidwina Priliani; Lydia V. Panggalo; Muhammad Rezki Rasyak; Safarina G Malik; Sukma Oktavianthi; Willy Agustine                                                                                                                                                                                                                                                                                                                                                                                                           |
| EPI_ISL_1284190, EPI_ISL_1284193, EPI_ISL_1622416, EPI_ISL_1622417, EPI_ISL_1622434                                                                                                                                                                           | RS Permata Cibubur                                    |                                  | Eijkman Institute for Molecular Biology, Ministry of Research and Technology/National Agency for Research and Innovation                                                                                                                                                                                                                                                                                                                               | Amin Soebandrio; Edison Johar; Frilasita A Yudhaputri; Hidayat Trimarsanto; Iskandar Adnan; Khin Saw Myint; Lydia V. Panggalo; Muhammad Rezki Rasyak; Safarina G Malik; Sukma Oktavianthi; Willy Agustine                                                                                                                                                                                                                                                                                                                                                                                                                             |
| EPI_ISL_2364597, EPI_ISL_2364646, EPI_ISL_2364650                                                                                                                                                                                                             | RS Permata Cibubur                                    |                                  | Eijkman Institute for Molecular Biology, National Agency for Research and Innovation                                                                                                                                                                                                                                                                                                                                                                   | Amin Soebandrio; Edison Johar; Frilasita A Yudhaputri; Hidayat Trimarsanto; Iskandar Adnan; Khin Saw Myint; Lidwina Priliani; Lydia V. Panggalo; Muhammad Rezki Rasyak; Safarina G Malik; Sukma Oktavianthi; Willy Agustine                                                                                                                                                                                                                                                                                                                                                                                                           |
| EPI_ISL_2614681, EPI_ISL_2614682, EPI_ISL_2614694                                                                                                                                                                                                             | RS Permata Cibubur                                    |                                  | Eijkman Institute for Molecular Biology, National Research and Innovation Agency                                                                                                                                                                                                                                                                                                                                                                       | Amin Soebandrio; Edison Johar; Frilasita A Yudhaputri; Hidayat Trimarsanto; Iskandar Adnan; Khin Saw Myint; Lidwina Priliani; Lydia V. Panggalo; Muhammad Rezki Rasyak; Safarina G Malik; Sukma Oktavianthi; Willy Agustine                                                                                                                                                                                                                                                                                                                                                                                                           |

|                                                                                                                                                                                                                                                                                                                                                                                                                                                                                                                              |                                                                                  |                                                                                                                                                                                                                                                                                                                                                                                                                                                                                                                                                                  |                                                                                                                                                                                                                                                                                                                                                                                                                                                                                                                                                                                                                                                                                                    |
|------------------------------------------------------------------------------------------------------------------------------------------------------------------------------------------------------------------------------------------------------------------------------------------------------------------------------------------------------------------------------------------------------------------------------------------------------------------------------------------------------------------------------|----------------------------------------------------------------------------------|------------------------------------------------------------------------------------------------------------------------------------------------------------------------------------------------------------------------------------------------------------------------------------------------------------------------------------------------------------------------------------------------------------------------------------------------------------------------------------------------------------------------------------------------------------------|----------------------------------------------------------------------------------------------------------------------------------------------------------------------------------------------------------------------------------------------------------------------------------------------------------------------------------------------------------------------------------------------------------------------------------------------------------------------------------------------------------------------------------------------------------------------------------------------------------------------------------------------------------------------------------------------------|
| EPI_ISL_2709394<br>EPI_ISL_775597<br>EPI_ISL_766041                                                                                                                                                                                                                                                                                                                                                                                                                                                                          | RS Pertamina Sorong<br><br>RS Polri                                              | National Institute of Health Research and Development<br><br>Eijkman Institute for Molecular Biology, Ministry of Research and Technology/National Agency for Research and Innovation                                                                                                                                                                                                                                                                                                                                                                            | AA; HA; HD; Ikawati; KD; KNA; N; Nugraha; Pangesti; Pawestri; Puspa; Puspandari; Setiawaty; Soekarso; Subangkit; T; V; Yosepin<br>Amin Soebandrio; David H Muljono; Edison Johar; Frilasita A Yudhaputri; Hidayat Trimarsanto; Khin Saw Myint; Safarina G Malik                                                                                                                                                                                                                                                                                                                                                                                                                                    |
| EPI_ISL_888989<br>EPI_ISL_888990                                                                                                                                                                                                                                                                                                                                                                                                                                                                                             | RS Pondok Indah Bintaro Jaya                                                     | Eijkman Institute for Molecular Biology, Ministry of Research and Technology/National Agency for Research and Innovation                                                                                                                                                                                                                                                                                                                                                                                                                                         | Amin Soebandrio; Edison Johar; Frilasita A Yudhaputri; Hidayat Trimarsanto; Iskandar Adnan; Khin Saw Myint; Lydia V. Panggalo; Safarina G Malik; Sukma Oktavianthi; Willy Agustine                                                                                                                                                                                                                                                                                                                                                                                                                                                                                                                 |
| EPI_ISL_435282,<br>EPI_ISL_435283,<br>EPI_ISL_437190,<br>EPI_ISL_437191,<br>EPI_ISL_888982                                                                                                                                                                                                                                                                                                                                                                                                                                   | RS Pondok Indah Hospital – Pondok Indah                                          | Eijkman Institute for Molecular Biology, Ministry of Research and Technology/National Agency for Research and Innovation                                                                                                                                                                                                                                                                                                                                                                                                                                         | Amin Soebandrio; David H Muljono; Edison Johar; Frilasita A Yudhaputri; Hidayat Trimarsanto; Iskandar Adnan; Khin Saw Myint; Lydia V. Panggalo; Safarina G Malik; Sukma Oktavianthi; Willy Agustine                                                                                                                                                                                                                                                                                                                                                                                                                                                                                                |
| EPI_ISL_2614735, EPI_ISL_2614737, EPI_ISL_2614738, EPI_ISL_2709358, EPI_ISL_2709369, EPI_ISL_2709373, EPI_ISL_2709374, EPI_ISL_2709375, EPI_ISL_2709376, EPI_ISL_2709377, EPI_ISL_2709381, EPI_ISL_2709387, EPI_ISL_2709391, EPI_ISL_2709401, EPI_ISL_2709402, EPI_ISL_2811834, EPI_ISL_2811835, EPI_ISL_2811836, EPI_ISL_2918604, EPI_ISL_2918605, EPI_ISL_2918606, EPI_ISL_2918607, EPI_ISL_2918609, EPI_ISL_2918610, EPI_ISL_2918611, EPI_ISL_2918612, EPI_ISL_3029931, EPI_ISL_3029932, EPI_ISL_3029997, EPI_ISL_3029998 | Eijkman Institute for Molecular Biology, National Research and Innovation Agency | Amin Soebandrio; Edison Johar; Frilasita A Yudhaputri; Hidayat Trimarsanto; Iskandar Adnan; Khin Saw Myint; Lidwina Priliani; Lydia V. Panggalo; Muhammad Rezki Rasyak; Safarina G Malik; Sukma Oktavianthi; Willy Agustine                                                                                                                                                                                                                                                                                                                                      |                                                                                                                                                                                                                                                                                                                                                                                                                                                                                                                                                                                                                                                                                                    |
| see above<br>EPI_ISL_5021156                                                                                                                                                                                                                                                                                                                                                                                                                                                                                                 | RS Pondok Indah Pondok Indah<br>RS Pondok Indah Pondok Indah                     | Eijkman Research Center for Molecular Biology, National Research and Innovation Agency                                                                                                                                                                                                                                                                                                                                                                                                                                                                           | Amin Soebandrio; Edison Johar; Frilasita A Yudhaputri; Hidayat Trimarsanto; Iskandar Adnan; Jessica R Saragih; Khin Saw Myint; Lidwina Priliani; Lydia V Panggalo; Muhammad Rezki Rasyak; Safarina G Malik; Sukma Oktavianthi; Willy Agustine                                                                                                                                                                                                                                                                                                                                                                                                                                                      |
| EPI_ISL_568689                                                                                                                                                                                                                                                                                                                                                                                                                                                                                                               | RS Pondok Indah Puri Indah                                                       | Eijkman Institute for Molecular Biology, Ministry of Research and Technology/National Agency for Research and Innovation                                                                                                                                                                                                                                                                                                                                                                                                                                         | Amin Soebandrio; David H Muljono; Edison Johar; Frilasita A Yudhaputri; Herawati Sudoyo; Hidayat Trimarsanto; Iskandar A Adnan; Khin Saw Myint; Safarina G Malik; Willy Agustine                                                                                                                                                                                                                                                                                                                                                                                                                                                                                                                   |
| EPI_ISL_3159693,<br>EPI_ISL_3466003,<br>EPI_ISL_3466009,<br>EPI_ISL_3550458<br>EPI_ISL_574611                                                                                                                                                                                                                                                                                                                                                                                                                                | RS Pondok Indah Puri Indah<br><br>RS Premier Bintaro                             | Eijkman Institute for Molecular Biology, National Research and Innovation Agency<br><br>Eijkman Institute for Molecular Biology, Ministry of Research and Technology/National Agency for Research and Innovation                                                                                                                                                                                                                                                                                                                                                 | Amin Soebandrio; Edison Johar; Frilasita A Yudhaputri; Hidayat Trimarsanto; Iskandar Adnan; Jessica R. Saragih; Khin Saw Myint; Lidwina Priliani; Lydia V. Panggalo; Muhammad Rezki Rasyak; Safarina G Malik; Sukma Oktavianthi; Willy Agustine<br><br>Amin Soebandrio; David H Muljono; Edison Johar; Frilasita A Yudhaputri; Herawati Sudoyo; Hidayat Trimarsanto; Iskandar A Adnan; Khin Saw Myint; Safarina G Malik; Willy Agustine                                                                                                                                                                                                                                                            |
| EPI_ISL_2709403,<br>EPI_ISL_3029938<br>EPI_ISL_2987634<br>EPI_ISL_2965787,<br>EPI_ISL_2965788                                                                                                                                                                                                                                                                                                                                                                                                                                | RS Premier Surabaya<br>RS Prima Husada Cipta                                     | Eijkman Institute for Molecular Biology, National Research and Innovation Agency<br><br>National Institute of Health Research and Development<br>National Institute of Health Research and Development                                                                                                                                                                                                                                                                                                                                                           | Amin Soebandrio; Edison Johar; Frilasita A Yudhaputri; Hidayat Trimarsanto; Iskandar Adnan; Khin Saw Myint; Lidwina Priliani; Lydia V. Panggalo; Muhammad Rezki Rasyak; Safarina G Malik; Sukma Oktavianthi; Willy Agustine<br><br>Arie Ardiansyah Nugraha; Fajar Nur Sulistiyohadi; Hana Apsari Pawestri; Hartanti Dian Ikawati; Kartika Dewi Puspa; Krisna Pangesti; Nelly Puspandari; Subangkit; Triyani Soekarso; Vivi Setiawaty<br>Arie Ardiansyah Nugraha; Fajar Nur Sulistiyohadi; Hana Apsari Pawestri; Hartanti Dian Ikawati; Kartika Dewi Puspa; Krisna Pangesti; Nelly Puspandari; Subangkit; Triyani Soekarso; Vivi Setiawaty                                                          |
| EPI_ISL_538500,<br>EPI_ISL_538501                                                                                                                                                                                                                                                                                                                                                                                                                                                                                            | RS Prima Husada Cipta Medan North Sumatra                                        | National Institute of Health Research and Development                                                                                                                                                                                                                                                                                                                                                                                                                                                                                                            | AA; HA; HD; Ikawati; KD; KNA; Nugraha; Paisal; Pangesti; Pawestri; Puspa; Setiawaty, V.; Soekarso; Subangkit; T                                                                                                                                                                                                                                                                                                                                                                                                                                                                                                                                                                                    |
| EPI_ISL_2631481,<br>EPI_ISL_2631482,<br>EPI_ISL_2631483,<br>EPI_ISL_2631484,<br>EPI_ISL_2631485,<br>EPI_ISL_2631486                                                                                                                                                                                                                                                                                                                                                                                                          | RS Primaya                                                                       | Indonesian Institute of Sciences (LIPI)/National Agency of Research and Innovation (BRIN) and National Institute of Health Research and Development (NIHRD)                                                                                                                                                                                                                                                                                                                                                                                                      | Alfi T. Fathurahman; Andri Wardiana; Anggia Prasetyoputri; Anik B. Dharmayanthi; Asep M. Ridwanulloh; Erwin F. Hasrianda; Hariyatus; Idris; Rathih A. Ningrum; Ruby Setiawan; Subangkit; Sugiyono Saputra; Syam B. Iryanto; Vivi Setiawaty; Yayuk Sri Rahayu                                                                                                                                                                                                                                                                                                                                                                                                                                       |
| EPI_ISL_1284057                                                                                                                                                                                                                                                                                                                                                                                                                                                                                                              | RS Primaya Tangerang                                                             | Eijkman Institute for Molecular Biology, Ministry of Research and Technology/National Agency for Research and Innovation                                                                                                                                                                                                                                                                                                                                                                                                                                         | Amin Soebandrio; Edison Johar; Frilasita A Yudhaputri; Hidayat Trimarsanto; Iskandar Adnan; Khin Saw Myint; Lydia V. Panggalo; Safarina G Malik; Sukma Oktavianthi; Willy Agustine                                                                                                                                                                                                                                                                                                                                                                                                                                                                                                                 |
| EPI_ISL_2896198                                                                                                                                                                                                                                                                                                                                                                                                                                                                                                              | RS Pusat Otak Nasional Prof dr. Mahar Mardjono                                   | National Institute of Health Research and Development                                                                                                                                                                                                                                                                                                                                                                                                                                                                                                            | Arie Ardiansyah Nugraha; Hana Apsari Pawestri; Hartanti Dian Ikawati; Kartika Dewi Puspa; Krisna Pangesti; Nelly Puspandari; Subangkit; Triyani Soekarso; Vivi Setiawaty                                                                                                                                                                                                                                                                                                                                                                                                                                                                                                                           |
| EPI_ISL_2614733, EPI_ISL_2614734, EPI_ISL_2709362, EPI_ISL_2709363, EPI_ISL_2709364, EPI_ISL_2709365, EPI_ISL_2709370, EPI_ISL_2709371, EPI_ISL_2709372, EPI_ISL_2709379, EPI_ISL_2709380                                                                                                                                                                                                                                                                                                                                    | see above<br>RS Pusat Pertamina<br>RS Qadr                                       | Eijkman Institute for Molecular Biology, National Research and Innovation Agency<br>Eijkman Institute for Molecular Biology, Ministry of Research and Technology/National Agency for Research and Innovation                                                                                                                                                                                                                                                                                                                                                     | Amin Soebandrio; Edison Johar; Frilasita A Yudhaputri; Hidayat Trimarsanto; Iskandar Adnan; Khin Saw Myint; Lidwina Priliani; Lydia V. Panggalo; Muhammad Rezki Rasyak; Safarina G Malik; Sukma Oktavianthi; Willy Agustine<br>Amin Soebandrio; Edison Johar; Frilasita A Yudhaputri; Hidayat Trimarsanto; Iskandar Adnan; Khin Saw Myint; Lydia V. Panggalo; Muhammad Rezki Rasyak; Safarina G Malik; Sukma Oktavianthi; Willy Agustine                                                                                                                                                                                                                                                           |
| EPI_ISL_888988,<br>EPI_ISL_947262,<br>EPI_ISL_1622418<br>EPI_ISL_833499,<br>EPI_ISL_833571<br>EPI_ISL_5010527                                                                                                                                                                                                                                                                                                                                                                                                                | RS Qadr, Tangerang, Indonesia<br><br>RS Rajawali Citra                           | Biosafety Level-3 Laboratory, Indonesian Institute of Sciences (LIPI)<br><br>Genetics Working Group (Pokja Genetik) Faculty of Medicine, Public Health and Nursing Universitas Gadjah Mada (FK-KMK UGM); Disease Investigation Center Wates Ministry of Agriculture Indonesia; Department of Microbiology FK-KMK UGM; Laboratorium Diagnostik Yayasan Tahija World Mosquito Program (WMP) Yogyakarta Center for Tropical Medicine FK-KMK UGM; Integrated Research Center FK-KMK UGM; Department of Computer Science and Electronics FMIPA UGM; RSUP Dr. Sardjito | Ade Andriani; Ahmad Fathoni; Andri Wardiana; Anggia Prasetyoputri; Anik Budhi Dharmayanthi; Erwin Fajar Hasrianda; Isa Nuryana; Rathih Asmana Ningrum; Ratna Dwi Ramadani; Ryan Haryo Setiawan; Sugiyono Saputra; Syam Budi Iryanto<br>Afiahayati; Alvina A Setiawan; Cita S Amalia; Dwi AA Nugrahaningsih; Dwi Indaryati; Edwin W. Daniwijaya; Eggi Arguni; Endah Supriyati; Gunadi; Hendra Wibawa; Indarto Sulistiyono; Kristy Iskandar; Ludhang P. Rizki; Marcellus; Mohamad S. Hakim; Nungki Anggorowati; Pramesti G Dewi; Siswanto; Titik Nuryastuti; Tri Wibawa                                                                                                                              |
| EPI_ISL_889013                                                                                                                                                                                                                                                                                                                                                                                                                                                                                                               | RS Rawa Lumbu                                                                    | Eijkman Institute for Molecular Biology, Ministry of Research and Technology/National Agency for Research and Innovation                                                                                                                                                                                                                                                                                                                                                                                                                                         | Amin Soebandrio; Edison Johar; Frilasita A Yudhaputri; Hidayat Trimarsanto; Iskandar Adnan; Khin Saw Myint; Lydia V. Panggalo; Safarina G Malik; Sukma Oktavianthi; Willy Agustine                                                                                                                                                                                                                                                                                                                                                                                                                                                                                                                 |
| EPI_ISL_3070862<br>EPI_ISL_4741896                                                                                                                                                                                                                                                                                                                                                                                                                                                                                           | RS Rawa Lumbu<br>RS Roemani Muhammadiyah                                         | Eijkman Institute for Molecular Biology, National Research and Innovation Agency<br>Balai Laboratorium Kesehatan Dan Pengujian Alat Kesehatan Provinsi Jawa Tengah                                                                                                                                                                                                                                                                                                                                                                                               | Amin Soebandrio; Edison Johar; Frilasita A Yudhaputri; Hidayat Trimarsanto; Iskandar Adnan; Khin Saw Myint; Lidwina Priliani; Lydia V. Panggalo; Muhammad Rezki Rasyak; Safarina G Malik; Sukma Oktavianthi; Willy Agustine<br>Alia Wijayanti; Dwi Nursetyaasih; Dyah Ayu; Endah Wahyu Y; Ismi Farhati; Purnomo; Sekti Handayani; Wiwik Peni; Yekti Hediningsih                                                                                                                                                                                                                                                                                                                                    |
| EPI_ISL_2868912,<br>EPI_ISL_2868913<br>EPI_ISL_1284281                                                                                                                                                                                                                                                                                                                                                                                                                                                                       | RS Royal Progress<br>RS Royal Taruma                                             | National Institute of Health Research and Development<br>Eijkman Institute for Molecular Biology, Ministry of Research and Technology/National Agency for Research and Innovation                                                                                                                                                                                                                                                                                                                                                                                | Arie Ardiansyah Nugraha; Hana Apsari Pawestri; Hartanti Dian Ikawati; Kartika Dewi Puspa; Krisna Pangesti; Nelly Puspandari; Subangkit; Triyani Soekarso; Vivi Setiawaty<br><br>Amin Soebandrio; Edison Johar; Frilasita A Yudhaputri; Hidayat Trimarsanto; Iskandar Adnan; Khin Saw Myint; Lydia V. Panggalo; Safarina G Malik; Sukma Oktavianthi; Willy Agustine                                                                                                                                                                                                                                                                                                                                 |
| EPI_ISL_1284052,<br>EPI_ISL_1284078<br>EPI_ISL_791985                                                                                                                                                                                                                                                                                                                                                                                                                                                                        | RS Rumah Indonesia Sehat<br>RS Santa Maria Pekanbaru                             | Eijkman Institute for Molecular Biology, Ministry of Research and Technology/National Agency for Research and Innovation<br><br>National Institute of Health Research and Development                                                                                                                                                                                                                                                                                                                                                                            | Amin Soebandrio; Edison Johar; Frilasita A Yudhaputri; Hidayat Trimarsanto; Iskandar Adnan; Khin Saw Myint; Lydia V. Panggalo; Safarina G Malik; Sukma Oktavianthi; Willy Agustine<br><br>AA; Fridayenti; HA; HD; Ikawati; KD; KNA; N; Nugraha; Pangesti; Pawestri; Puspa; Puspandari; Setiawaty; Soekarso; Subangkit; T; V                                                                                                                                                                                                                                                                                                                                                                        |
| EPI_ISL_766042,<br>EPI_ISL_947265,<br>EPI_ISL_947320,<br>EPI_ISL_1622363,<br>EPI_ISL_1622364                                                                                                                                                                                                                                                                                                                                                                                                                                 | RS Sari Asih Ciledug                                                             | Eijkman Institute for Molecular Biology, Ministry of Research and Technology/National Agency for Research and Innovation                                                                                                                                                                                                                                                                                                                                                                                                                                         | Amin Soebandrio; David H Muljono; Edison Johar; Frilasita A Yudhaputri; Hidayat Trimarsanto; Iskandar Adnan; Khin Saw Myint; Lydia V. Panggalo; Muhammad Rezki Rasyak; Safarina G Malik; Sukma Oktavianthi; Willy Agustine                                                                                                                                                                                                                                                                                                                                                                                                                                                                         |
| EPI_ISL_2364599<br>EPI_ISL_2709385,<br>EPI_ISL_2709386                                                                                                                                                                                                                                                                                                                                                                                                                                                                       | RS Sari Asih Ciledug<br>RS Sari Asih Cipondoh                                    | Eijkman Institute for Molecular Biology, National Agency for Research and Innovation<br>Eijkman Institute for Molecular Biology, National Research and Innovation Agency                                                                                                                                                                                                                                                                                                                                                                                         | Amin Soebandrio; Edison Johar; Frilasita A Yudhaputri; Hidayat Trimarsanto; Iskandar Adnan; Khin Saw Myint; Lidwina Priliani; Lydia V. Panggalo; Muhammad Rezki Rasyak; Safarina G Malik; Sukma Oktavianthi; Willy Agustine<br>Amin Soebandrio; Edison Johar; Frilasita A Yudhaputri; Hidayat Trimarsanto; Iskandar Adnan; Khin Saw Myint; Lidwina Priliani; Lydia V. Panggalo; Muhammad Rezki Rasyak; Safarina G Malik; Sukma Oktavianthi; Willy Agustine                                                                                                                                                                                                                                         |
| EPI_ISL_833501,<br>EPI_ISL_833502<br>EPI_ISL_2617464,<br>EPI_ISL_2617465                                                                                                                                                                                                                                                                                                                                                                                                                                                     | RS Sayang Bunda, Makasar, Indonesia<br>RS Semen Gresik                           | Biosafety Level-3 Laboratory, Indonesian Institute of Sciences (LIPI)<br><br>National Institute of Health Research and Development                                                                                                                                                                                                                                                                                                                                                                                                                               | Ade Andriani; Ahmad Fathoni; Andri Wardiana; Anggia Prasetyoputri; Anik Budhi Dharmayanthi; Fajarrudin Ahmad; Herjuno Ari Eko Nugroho; I sa Nuryana; Isa Nuryana; Masrukhin; Onny Nurrahman Marwayana; Rathih Asmana Ningrum; Syam Budi Iryanto<br>Agustiningsih; Arie Ardiansyah Nugraha; Fauzul Muna; Hana Apsari Pawestri; Hartanti Dian Ikawati; Herna; Holy Arif Wibowo; Irene Lorinda Indalao; Kartika Dewi Puspa; Kindi Adam; Krisna Nur Andriana Pangesti; Natalie Laurencia Kipuw; Nelly Puspandari; Ni Ketut Susilarini; Nike Susanti; Nurika Hariastuti; Reni Herman; Rinin Ramadhany; Subangkit; Tati Febriyanti; Triyani Soekarso; Uily Alfi Nikmah; Vivi Setiawaty.; Yuni Rukminiati |
| EPI_ISL_889008                                                                                                                                                                                                                                                                                                                                                                                                                                                                                                               | RS Sentra Medika Cibinong                                                        | Eijkman Institute for Molecular Biology, Ministry of Research and Technology/National Agency for Research and Innovation                                                                                                                                                                                                                                                                                                                                                                                                                                         | Amin Soebandrio; Edison Johar; Frilasita A Yudhaputri; Hidayat Trimarsanto; Iskandar Adnan; Khin Saw Myint; Lydia V. Panggalo; Safarina G Malik; Sukma Oktavianthi; Willy Agustine                                                                                                                                                                                                                                                                                                                                                                                                                                                                                                                 |
| EPI_ISL_2364615<br>EPI_ISL_2709392,<br>EPI_ISL_3029994                                                                                                                                                                                                                                                                                                                                                                                                                                                                       | RS Sentra Medika Cibinong<br>RS Sentra Medika Cibinong                           | Eijkman Institute for Molecular Biology, National Agency for Research and Innovation<br>Eijkman Institute for Molecular Biology, National Research and Innovation Agency                                                                                                                                                                                                                                                                                                                                                                                         | Amin Soebandrio; Edison Johar; Frilasita A Yudhaputri; Hidayat Trimarsanto; Iskandar Adnan; Khin Saw Myint; Lidwina Priliani; Lydia V. Panggalo; Muhammad Rezki Rasyak; Safarina G Malik; Sukma Oktavianthi; Willy Agustine<br>Amin Soebandrio; Edison Johar; Frilasita A Yudhaputri; Hidayat Trimarsanto; Iskandar Adnan; Khin Saw Myint; Lidwina Priliani; Lydia V. Panggalo; Muhammad Rezki Rasyak; Safarina G Malik; Sukma Oktavianthi; Willy Agustine                                                                                                                                                                                                                                         |
| EPI_ISL_947307, EPI_ISL_947309, EPI_ISL_1283936, EPI_ISL_1284027, EPI_ISL_1284029, EPI_ISL_1284156, EPI_ISL_1284160, EPI_ISL_1284318, EPI_ISL_1284340, EPI_ISL_1622362, EPI_ISL_1622374, EPI_ISL_1622390, EPI_ISL_1622419, EPI_ISL_1622420, EPI_ISL_1622431, EPI_ISL_1622432                                                                                                                                                                                                                                                 | see above<br>RS Sentra Medika Cikarang                                           | Eijkman Institute for Molecular Biology, Ministry of Research and Technology/National Agency for Research and Innovation                                                                                                                                                                                                                                                                                                                                                                                                                                         | Amin Soebandrio; Edison Johar; Frilasita A Yudhaputri; Hidayat Trimarsanto; Iskandar Adnan; Khin Saw Myint; Lydia V. Panggalo; Muhammad Rezki Rasyak; Safarina G Malik; Sukma Oktavianthi; Willy Agustine                                                                                                                                                                                                                                                                                                                                                                                                                                                                                          |
| EPI_ISL_2013043, EPI_ISL_2013044, EPI_ISL_2364569, EPI_ISL_2364570, EPI_ISL_2364571, EPI_ISL_2364572, EPI_ISL_2364581, EPI_ISL_2364582, EPI_ISL_2364621, EPI_ISL_2364624, EPI_ISL_2364626                                                                                                                                                                                                                                                                                                                                    | see above<br>RS Sentra Medika Cikarang                                           | Eijkman Institute for Molecular Biology, National Agency for Research and Innovation                                                                                                                                                                                                                                                                                                                                                                                                                                                                             | Amin Soebandrio; Edison Johar; Frilasita A Yudhaputri; Hidayat Trimarsanto; Iskandar Adnan; Khin Saw Myint; Lidwina Priliani; Lydia V. Panggalo; Muhammad Rezki Rasyak; Safarina G Malik; Sukma Oktavianthi; Willy Agustine                                                                                                                                                                                                                                                                                                                                                                                                                                                                        |
| EPI_ISL_2614649, EPI_ISL_2614660, EPI_ISL_2614672, EPI_ISL_2614673, EPI_ISL_2614674, EPI_ISL_2614683, EPI_ISL_2614684, EPI_ISL_2614685, EPI_ISL_2614686, EPI_ISL_2614687, EPI_ISL_2614695, EPI_ISL_2614696, EPI_ISL_2614706, EPI_ISL_2614707, EPI_ISL_2614713, EPI_ISL_2614720                                                                                                                                                                                                                                               | see above<br>RS Sentra Medika Cikarang                                           | Eijkman Institute for Molecular Biology, National Research and Innovation Agency                                                                                                                                                                                                                                                                                                                                                                                                                                                                                 | Amin Soebandrio; Edison Johar; Frilasita A Yudhaputri; Hidayat Trimarsanto; Iskandar Adnan; Khin Saw Myint; Lidwina Priliani; Lydia V. Panggalo; Muhammad Rezki Rasyak; Safarina G Malik; Sukma Oktavianthi; Willy Agustine                                                                                                                                                                                                                                                                                                                                                                                                                                                                        |
| EPI_ISL_947323                                                                                                                                                                                                                                                                                                                                                                                                                                                                                                               | RS Siloam Kebon Jeruk                                                            | Eijkman Institute for Molecular Biology, Ministry of Research and Technology/National Agency for Research and Innovation                                                                                                                                                                                                                                                                                                                                                                                                                                         | Amin Soebandrio; Edison Johar; Frilasita A Yudhaputri; Hidayat Trimarsanto; Iskandar Adnan; Khin Saw Myint; Lydia V. Panggalo; Safarina G Malik; Sukma Oktavianthi; Willy Agustine                                                                                                                                                                                                                                                                                                                                                                                                                                                                                                                 |

|                                                                                                                                                                                                                                                                                                                                                                                                                                                                                            |                                               |                                                                                                                                                                                                                                                                                                                                                                                                                                                        |                                                                                                                                                                                                                                                                                                                                                                                                                                                                                                                                                                                                                                                                                                  |
|--------------------------------------------------------------------------------------------------------------------------------------------------------------------------------------------------------------------------------------------------------------------------------------------------------------------------------------------------------------------------------------------------------------------------------------------------------------------------------------------|-----------------------------------------------|--------------------------------------------------------------------------------------------------------------------------------------------------------------------------------------------------------------------------------------------------------------------------------------------------------------------------------------------------------------------------------------------------------------------------------------------------------|--------------------------------------------------------------------------------------------------------------------------------------------------------------------------------------------------------------------------------------------------------------------------------------------------------------------------------------------------------------------------------------------------------------------------------------------------------------------------------------------------------------------------------------------------------------------------------------------------------------------------------------------------------------------------------------------------|
| EPI_ISL_574606                                                                                                                                                                                                                                                                                                                                                                                                                                                                             | RS Siloam Purwakarta                          | Eijkman Institute for Molecular Biology, Ministry of Research and Technology/National Agency for Research and Innovation                                                                                                                                                                                                                                                                                                                               | Amin Soebandrio; David H Muljono; Edison Johar; Frilasita A Yudhaputri; Herawati Sudoyo; Hidayat Trimarsanto; Iskandar A Adnan; Khin Saw Myint; Safarina G Malik; Willy Agustine                                                                                                                                                                                                                                                                                                                                                                                                                                                                                                                 |
| EPI_ISL_1622369, EPI_ISL_1622424                                                                                                                                                                                                                                                                                                                                                                                                                                                           | RS Sumber Waras                               | Eijkman Institute for Molecular Biology, Ministry of Research and Technology/National Agency for Research and Innovation                                                                                                                                                                                                                                                                                                                               | Amin Soebandrio; Edison Johar; Frilasita A Yudhaputri; Hidayat Trimarsanto; Iskandar Adnan; Khin Saw Myint; Lydia V. Panggalo; Muhammad Rezki Rasyak; Safarina G Malik; Sukma Oktavianthi; Willy Agustine                                                                                                                                                                                                                                                                                                                                                                                                                                                                                        |
| EPI_ISL_2364602                                                                                                                                                                                                                                                                                                                                                                                                                                                                            | RS Sumber Waras                               | Eijkman Institute for Molecular Biology, National Agency for Research and Innovation                                                                                                                                                                                                                                                                                                                                                                   | Amin Soebandrio; Edison Johar; Frilasita A Yudhaputri; Hidayat Trimarsanto; Iskandar Adnan; Khin Saw Myint; Lidwina Priliani; Lydia V. Panggalo; Muhammad Rezki Rasyak; Safarina G Malik; Sukma Oktavianthi; Willy Agustine                                                                                                                                                                                                                                                                                                                                                                                                                                                                      |
| EPI_ISL_2614646, EPI_ISL_2614647, EPI_ISL_2614669, EPI_ISL_2614670, EPI_ISL_2614715, EPI_ISL_2614732                                                                                                                                                                                                                                                                                                                                                                                       | RS Sumber Waras                               | Eijkman Institute for Molecular Biology, National Research and Innovation Agency                                                                                                                                                                                                                                                                                                                                                                       | Amin Soebandrio; Edison Johar; Frilasita A Yudhaputri; Hidayat Trimarsanto; Iskandar Adnan; Khin Saw Myint; Lidwina Priliani; Lydia V. Panggalo; Muhammad Rezki Rasyak; Safarina G Malik; Sukma Oktavianthi; Willy Agustine                                                                                                                                                                                                                                                                                                                                                                                                                                                                      |
| EPI_ISL_833039                                                                                                                                                                                                                                                                                                                                                                                                                                                                             | RS TK II 02.05.01 dr. AK Gani Palembang       | National Institute of Health Research and Development                                                                                                                                                                                                                                                                                                                                                                                                  | A; AA; HA; HD; Ikawati; KD; KNA; N; Nugraha; Pangesti; Pawestri; Puspa; Puspandari; RP; Setiawaty; Soekarso; Subangkit; T; Tantula; V; Wiradharma                                                                                                                                                                                                                                                                                                                                                                                                                                                                                                                                                |
| EPI_ISL_2854698, EPI_ISL_2896197                                                                                                                                                                                                                                                                                                                                                                                                                                                           | RS TK II M Ridwan Meuraksa                    | National Institute of Health Research and Development                                                                                                                                                                                                                                                                                                                                                                                                  | Arie Ardiansyah Nugraha; Hana Aparsi Pawestri; Hartanti Dian Ikawati; Kartika Dewi Puspa; Krisna Pangesti; Nelly Puspandari; Subangkit; Triyani Soekarso; Vivi Setiawaty                                                                                                                                                                                                                                                                                                                                                                                                                                                                                                                         |
| EPI_ISL_1284034, EPI_ISL_1284035, EPI_ISL_1622375                                                                                                                                                                                                                                                                                                                                                                                                                                          | RS Taman Harapan Baru                         | Eijkman Institute for Molecular Biology, Ministry of Research and Technology/National Agency for Research and Innovation                                                                                                                                                                                                                                                                                                                               | Amin Soebandrio; Edison Johar; Frilasita A Yudhaputri; Hidayat Trimarsanto; Iskandar Adnan; Khin Saw Myint; Lydia V. Panggalo; Muhammad Rezki Rasyak; Safarina G Malik; Sukma Oktavianthi; Willy Agustine                                                                                                                                                                                                                                                                                                                                                                                                                                                                                        |
| EPI_ISL_766040                                                                                                                                                                                                                                                                                                                                                                                                                                                                             | RS Tingkat II Moh. Ridwan Meuraksa            | Eijkman Institute for Molecular Biology, Ministry of Research and Technology/National Agency for Research and Innovation                                                                                                                                                                                                                                                                                                                               | Amin Soebandrio; David H Muljono; Edison Johar; Frilasita A Yudhaputri; Hidayat Trimarsanto; Khin Saw Myint; Safarina G Malik                                                                                                                                                                                                                                                                                                                                                                                                                                                                                                                                                                    |
| EPI_ISL_1020176, EPI_ISL_1020177, EPI_ISL_1020178, EPI_ISL_1020182, EPI_ISL_1020183, EPI_ISL_1020185, EPI_ISL_1020187, EPI_ISL_1020189, EPI_ISL_1020190, EPI_ISL_1020198, EPI_ISL_1020200, EPI_ISL_1020201, EPI_ISL_1020202, EPI_ISL_1117452, EPI_ISL_1117453, EPI_ISL_1117454, EPI_ISL_1117455, EPI_ISL_1117590, EPI_ISL_1137602, EPI_ISL_1137603, EPI_ISL_2840869, EPI_ISL_2840870, EPI_ISL_2840878, EPI_ISL_2840881, EPI_ISL_2840883, EPI_ISL_2840884, EPI_ISL_2840885, EPI_ISL_2840893 | see above                                     | RS Trimitra, Bogor, West java                                                                                                                                                                                                                                                                                                                                                                                                                          | Biosafety Level-3 Laboratory, Indonesian Institute of Sciences (LIPI)                                                                                                                                                                                                                                                                                                                                                                                                                                                                                                                                                                                                                            |
|                                                                                                                                                                                                                                                                                                                                                                                                                                                                                            |                                               |                                                                                                                                                                                                                                                                                                                                                                                                                                                        | Ade Andriani; Afli T. Fathurahman; Andri Wardiana; Anggia Prasetyoputri; Anik B. Dharmayanthi; Anik Budhi Dharmayanthi; Ari S. Wulandari; Asep M. Ridwanulloh; Asep M. Ridwanuloh; Eko Wahyu Putro; Erwin F. Hasrianda; Erwin Hasrianda; Fahrurrozi; Gita Syahputra; Hariyatun; Herjuno A. Nugroho; Idris; Indriawati; Inswasti Cahyani; Isa Nuryana; Linda Sukmarini; Listiana Oktavia; Masrukhin; Matthew W. Loose; Mohammad Ilyas; Nova D. Yanthi; Nova Dhillia Yanthi; Puspita Lisdianti; Rath A. Ningrum; Rath Asmana Ningrum; Ruby Setiawan; Sri Swasthikawati; Sugiyono Saputra; Sugiyono Saputra; Susanti; Syaiful Rizal; Syam B. Iryanto; Syam Budi Iryanto; Wien Kusharyoto; Yuliawati |
| EPI_ISL_759702                                                                                                                                                                                                                                                                                                                                                                                                                                                                             | RS UNS Surakarta                              | Universitas Sebelas Maret (UNS), Rumah sakit Universitas Sebelas Maret (RS-UNS) Surakarta, National Institute of Health Research and Development, Indonesian Ministry of Health                                                                                                                                                                                                                                                                        | Aff Avicena Gufron; Arie Ardiansyah Nugraha; Betty Suryawati; Dewi Puspa; Hana Aparsi Pawestri; Hartanti Dian Ika; Kartika; Vivi Setiawaty; Yulia sari; hartono; maryani                                                                                                                                                                                                                                                                                                                                                                                                                                                                                                                         |
| EPI_ISL_759701                                                                                                                                                                                                                                                                                                                                                                                                                                                                             | RS UNS, Surakarta                             | UNS/RS-UNS, Faculty of Medicine                                                                                                                                                                                                                                                                                                                                                                                                                        | Aff Avicenna Gufron; Arie Ardiansyah Nugraha; Betty Suryawati; HanaHana Aparsi Pawestri; Hartanti Dian Ika; Hartono; Kartika Dewi Puspa; Maryani; Vivi Setiawaty.; Yulia Sari                                                                                                                                                                                                                                                                                                                                                                                                                                                                                                                    |
| EPI_ISL_947278                                                                                                                                                                                                                                                                                                                                                                                                                                                                             | RS Umum Ciputra Hospital Citragarden City     | Eijkman Institute for Molecular Biology, Ministry of Research and Technology/National Agency for Research and Innovation                                                                                                                                                                                                                                                                                                                               | Amin Soebandrio; Edison Johar; Frilasita A Yudhaputri; Hidayat Trimarsanto; Iskandar Adnan; Khin Saw Myint; Lydia V. Panggalo; Safarina G Malik; Sukma Oktavianthi; Willy Agustine                                                                                                                                                                                                                                                                                                                                                                                                                                                                                                               |
| EPI_ISL_4104513, EPI_ISL_4104514, EPI_ISL_4104515, EPI_ISL_4104516, EPI_ISL_4104517                                                                                                                                                                                                                                                                                                                                                                                                        | RS Umum Daerah Dr. M. Yunus Bengkulu          | National Institute of Health Research and Development                                                                                                                                                                                                                                                                                                                                                                                                  | Arie Ardiansyah Nugraha; Fajar Nur Sulistiyohadi; Hana Aparsi Pawestri; Hartanti Dian Ikawati; Kartika Dewi Puspa; Krisna Pangesti; Nelly Puspandari; Subangkit; Triyani Soekarso; Vivi Setiawaty                                                                                                                                                                                                                                                                                                                                                                                                                                                                                                |
| EPI_ISL_1284083                                                                                                                                                                                                                                                                                                                                                                                                                                                                            | RS Umum Harapan Bunda                         | Eijkman Institute for Molecular Biology, Ministry of Research and Technology/National Agency for Research and Innovation                                                                                                                                                                                                                                                                                                                               | Amin Soebandrio; Edison Johar; Frilasita A Yudhaputri; Hidayat Trimarsanto; Iskandar Adnan; Khin Saw Myint; Lydia V. Panggalo; Safarina G Malik; Sukma Oktavianthi; Willy Agustine                                                                                                                                                                                                                                                                                                                                                                                                                                                                                                               |
| EPI_ISL_2262254, EPI_ISL_2262255, EPI_ISL_2262257, EPI_ISL_2262260, EPI_ISL_2262261, EPI_ISL_2262262, EPI_ISL_2262263, EPI_ISL_2262265, EPI_ISL_2854693, EPI_ISL_2854701, EPI_ISL_2854702, EPI_ISL_2854703, EPI_ISL_2854704                                                                                                                                                                                                                                                                | see above                                     | RS Umum Kartika Pulasas                                                                                                                                                                                                                                                                                                                                                                                                                                | National Institute of Health Research and Development                                                                                                                                                                                                                                                                                                                                                                                                                                                                                                                                                                                                                                            |
| EPI_ISL_2844832                                                                                                                                                                                                                                                                                                                                                                                                                                                                            | RS Umum Medika Dramaga, Bogor, West java      | Biosafety Level-3 Laboratory, Indonesian Institute of Sciences (LIPI)                                                                                                                                                                                                                                                                                                                                                                                  | Arie Ardiansyah Nugraha; Hana Aparsi Pawestri; Hartanti Dian Ikawati; Kartika Dewi Puspa; Krisna Pangesti; Nelly Puspandari; Subangkit; Triyani Soekarso; Vivi Setiawaty                                                                                                                                                                                                                                                                                                                                                                                                                                                                                                                         |
| EPI_ISL_2617494, EPI_ISL_2617499, EPI_ISL_2617501, EPI_ISL_2617513, EPI_ISL_2617516, EPI_ISL_2617517                                                                                                                                                                                                                                                                                                                                                                                       | RS Umum Medistra                              | National Institute of Health Research and Development                                                                                                                                                                                                                                                                                                                                                                                                  | Arie Ardiansyah Nugraha; Hana Aparsi Pawestri; Hartanti Dian Ikawati; Kartika Dewi Puspa; Krisna Pangesti; Nelly Puspandari; Subangkit; Triyani Soekarso; Vivi Setiawaty                                                                                                                                                                                                                                                                                                                                                                                                                                                                                                                         |
| EPI_ISL_947275                                                                                                                                                                                                                                                                                                                                                                                                                                                                             | RS Umum Mulia Pajajaran                       | Eijkman Institute for Molecular Biology, Ministry of Research and Technology/National Agency for Research and Innovation                                                                                                                                                                                                                                                                                                                               | Amin Soebandrio; Edison Johar; Frilasita A Yudhaputri; Hidayat Trimarsanto; Iskandar Adnan; Khin Saw Myint; Lydia V. Panggalo; Safarina G Malik; Sukma Oktavianthi; Willy Agustine                                                                                                                                                                                                                                                                                                                                                                                                                                                                                                               |
| EPI_ISL_2860290, EPI_ISL_2860291, EPI_ISL_2860292, EPI_ISL_2860293, EPI_ISL_2860332, EPI_ISL_2860333, EPI_ISL_2860334, EPI_ISL_2860335, EPI_ISL_2860336, EPI_ISL_2860337, EPI_ISL_2860338, EPI_ISL_2860339, EPI_ISL_2860340, EPI_ISL_2860341, EPI_ISL_2860342, EPI_ISL_2860343, EPI_ISL_2860344, EPI_ISL_2860345, EPI_ISL_2860346, EPI_ISL_2860360, EPI_ISL_2860361, EPI_ISL_2860362, EPI_ISL_2860363, EPI_ISL_2860364, EPI_ISL_2860365, EPI_ISL_2860366, EPI_ISL_2860367                  | see above                                     | RS Umum Trimitra                                                                                                                                                                                                                                                                                                                                                                                                                                       | Biosafety Level-3 Laboratory, Indonesian Institute of Sciences (LIPI)                                                                                                                                                                                                                                                                                                                                                                                                                                                                                                                                                                                                                            |
|                                                                                                                                                                                                                                                                                                                                                                                                                                                                                            |                                               |                                                                                                                                                                                                                                                                                                                                                                                                                                                        | Ade Andriani; Andri Wardiana; Anggia Prasetyoputri; Anik B. Dharmayanthi; Annisa D. Septiani; Asep M. Ridwanulloh; Asep M. Ridwanulloh; Fahrurrozi; Idris; Indriawati; Linda Sukmarini; Listiana Oktavia; Lusiana; Masrukhin; Maya Komalasari; Michael S. Parulian; Michael Saut Parulian; Nova D. Yanthi; Ocha P. Meitha; Puspita Lisdianti; Rath A. Ningrum; Ruby Setiawan; Sri Swasthikawati; Sugiyono Saputra; Syam B. Iryanto; Wien Kusharyoto; Willery Yeo; Yuhoniz A. Maryam; Yuliawati                                                                                                                                                                                                   |
| EPI_ISL_3086881, EPI_ISL_3086882, EPI_ISL_3086883, EPI_ISL_3086884, EPI_ISL_3086885                                                                                                                                                                                                                                                                                                                                                                                                        | RS Umum Trimitra                              | Indonesian Institute of Sciences (LIPI)                                                                                                                                                                                                                                                                                                                                                                                                                | Andri Wardiana; Anggia Prasetyoputri; Anik B. Dharmayanthi; Annisa D. Septiani; Indriawati; Isa Nuryana; Lusiana; Maya Komalasari; Michael Saut Parulian; Ocha P. Meitha; Rath A. Ningrum; Sugiyono Saputra; Syaiful Rizal; Syam B. Iryanto; Willery Yeo; Yuhoniz A. Maryam                                                                                                                                                                                                                                                                                                                                                                                                                      |
| EPI_ISL_2844812, EPI_ISL_2844813, EPI_ISL_2844814, EPI_ISL_2844816, EPI_ISL_2844817, EPI_ISL_2844818, EPI_ISL_2844819, EPI_ISL_2844820, EPI_ISL_2844821, EPI_ISL_2844823, EPI_ISL_2844829, EPI_ISL_2844830                                                                                                                                                                                                                                                                                 | see above                                     | RS Umum Trimitra, Bogor, West java                                                                                                                                                                                                                                                                                                                                                                                                                     | Biosafety Level-3 Laboratory, Indonesian Institute of Sciences (LIPI)                                                                                                                                                                                                                                                                                                                                                                                                                                                                                                                                                                                                                            |
|                                                                                                                                                                                                                                                                                                                                                                                                                                                                                            |                                               |                                                                                                                                                                                                                                                                                                                                                                                                                                                        | Alfi T. Fathurahman; Andri Wardiana; Anggia Prasetyoputri; Anik B. Dharmayanthi; Erwin F. Hasrianda; Fahrurrozi; Herjuno A. Nugroho; Idris; Linda Sukmarini; Nova D. Yanthi; Puspita Lisdianti; Rath A. Ningrum; Sri Swasthikawati; Sugiyono Saputra; Syam B. Iryanto                                                                                                                                                                                                                                                                                                                                                                                                                            |
| EPI_ISL_4106122, EPI_ISL_4106124, EPI_ISL_4106125, EPI_ISL_4106126                                                                                                                                                                                                                                                                                                                                                                                                                         | RS Umum Trimitra, Bogor, West java            | National Research and Innovation Agency (BRIN-Indonesia, VenomCoV Project Team)                                                                                                                                                                                                                                                                                                                                                                        | Andri Wardiana; Anggia Prasetyoputri; Erwin F. Hasrianda; Fahrurrozi; Herjuno A. Nugroho; Nova D. Yanthi; Sugiyono Saputra; Syam B. Iryanto                                                                                                                                                                                                                                                                                                                                                                                                                                                                                                                                                      |
| EPI_ISL_3279414                                                                                                                                                                                                                                                                                                                                                                                                                                                                            | RS Universitas Brawijaya                      | Institute of Tropical Disease, Universitas Airlangga                                                                                                                                                                                                                                                                                                                                                                                                   | Aldise M Nastri; Gatot Soegiarto; Jezzy R Dewantari; Kazufumi Shimizu; Krisnoadi Rahardjo; Laksmi Wulandari; Maria I Lusida; Resti Yudhawati; Rima R Prasetya; Soetjipto; Sri Andarini; Yasuko Mori                                                                                                                                                                                                                                                                                                                                                                                                                                                                                              |
| EPI_ISL_3138863, EPI_ISL_3138864, EPI_ISL_3138865                                                                                                                                                                                                                                                                                                                                                                                                                                          | RS Universitas Brawijaya                      | National Institute of Health Research and Development                                                                                                                                                                                                                                                                                                                                                                                                  | ; Arie Ardiansyah Nugraha; Fajar Nur Sulistiyohadi; Hana Aparsi Pawestri; Hartanti Dian Ikawati; Kartika Dewi Puspa; Krisna Pangesti; Nelly Puspandari; Subangkit; Triyani Soekarso; Vivi Setiawaty                                                                                                                                                                                                                                                                                                                                                                                                                                                                                              |
| EPI_ISL_2854697                                                                                                                                                                                                                                                                                                                                                                                                                                                                            | RS Universitas Brawijaya Malang               | National Institute of Health Research and Development                                                                                                                                                                                                                                                                                                                                                                                                  | Arie Ardiansyah Nugraha; Hana Aparsi Pawestri; Hartanti Dian Ikawati; Kartika Dewi Puspa; Krisna Pangesti; Nelly Puspandari; Subangkit; Triyani Soekarso; Vivi Setiawaty                                                                                                                                                                                                                                                                                                                                                                                                                                                                                                                         |
| EPI_ISL_5021323, EPI_ISL_5021333, EPI_ISL_5021344, EPI_ISL_5021349, EPI_ISL_5021357, EPI_ISL_5021375, EPI_ISL_5021410, EPI_ISL_5021416, EPI_ISL_5021420, EPI_ISL_5021424, EPI_ISL_5021430, EPI_ISL_5021433, EPI_ISL_5021438, EPI_ISL_5021461, EPI_ISL_5021471, EPI_ISL_5021527, EPI_ISL_5021581, EPI_ISL_5021589                                                                                                                                                                           | see above                                     | RS Universitas Sumatera Utara                                                                                                                                                                                                                                                                                                                                                                                                                          | Eijkman Research Center for Molecular Biology, National Research and Innovation Agency; Microbiology Laboratory, Faculty of Medicine, University of Sumatera Utara                                                                                                                                                                                                                                                                                                                                                                                                                                                                                                                               |
|                                                                                                                                                                                                                                                                                                                                                                                                                                                                                            |                                               |                                                                                                                                                                                                                                                                                                                                                                                                                                                        | Amin Soebandrio; Edison Johar; Frilasita A Yudhaputri; Hidayat Trimarsanto; Inke Nadia Diniyanti Lubis; Irbah Rea Alvida Nainggolan; Iskandar Adnan; Jessica R Saragih; Khin Saw Myint; Lidwina Priliani; Lydia V Panggalo; Mirzan Hasibuan; Muhammad Ichwan; Muhammad Rezki Rasyak; R Andika Dwi Cahyadi; R Lia Kusumawati; Ramadhan Bestari; Ranti Permatasari; Safarina G Malik; Sukma Oktavianthi; Tryna Tania; Willy Agustine                                                                                                                                                                                                                                                               |
| EPI_ISL_5107868, EPI_ISL_5107869, EPI_ISL_5107870, EPI_ISL_5107871, EPI_ISL_5107872, EPI_ISL_5107873, EPI_ISL_5107874, EPI_ISL_5107875, EPI_ISL_5107876, EPI_ISL_5107877, EPI_ISL_5107878, EPI_ISL_5107879, EPI_ISL_5107880, EPI_ISL_5107881, EPI_ISL_5107882, EPI_ISL_5107883, EPI_ISL_5107884, EPI_ISL_5107885                                                                                                                                                                           | see above                                     | RS Universitas Tanjung Pura                                                                                                                                                                                                                                                                                                                                                                                                                            | National Institute of Health Research and Development                                                                                                                                                                                                                                                                                                                                                                                                                                                                                                                                                                                                                                            |
|                                                                                                                                                                                                                                                                                                                                                                                                                                                                                            |                                               |                                                                                                                                                                                                                                                                                                                                                                                                                                                        | Andriani; Arie Ardiansyah Nugraha; Delima Fajar Liana; Fajar Nur Sulistiyohadi; Hana Aparsi Pawestri; Hartanti Dian Ikawati; Kartika Dewi Puspa; Krisna Pangesti; Nelly Puspandari; Puji Astuti; Sofi Siti Shofiyah; Subangkit; Triyani Soekarso; Virhan Novianry; Vivi Setiawaty                                                                                                                                                                                                                                                                                                                                                                                                                |
| EPI_ISL_4849719, EPI_ISL_5200499, EPI_ISL_5462140                                                                                                                                                                                                                                                                                                                                                                                                                                          | RS YARSI                                      | Genomik Solidaritas Indonesia Laboratorium                                                                                                                                                                                                                                                                                                                                                                                                             | Annisa Muthiah Sukirman; Anuraj Shankar; Ariel Pradipta; Carissa Sintca Wijaya; Dian Tri Wahyudi; Esti Rahayuning Tias; Gracia Felias Enos Korompis; Himawan Masyhuri; Intan Razari; Louisa Markus; Meutia Ayuputeri Kumaheri; Nida; Nurhayani Fatimah; Rana Zara Athaya; Reinhart Gabriel; Sayang Rahmadini; Stefanus Bernard; Sukryni Bahri; Vania Gavriila Wikasa                                                                                                                                                                                                                                                                                                                             |
| EPI_ISL_2364675                                                                                                                                                                                                                                                                                                                                                                                                                                                                            | RS Yarsi                                      | Eijkman Institute for Molecular Biology, National Agency for Research and Innovation                                                                                                                                                                                                                                                                                                                                                                   | Amin Soebandrio; Edison Johar; Frilasita A Yudhaputri; Hidayat Trimarsanto; Iskandar Adnan; Khin Saw Myint; Lidwina Priliani; Lydia V. Panggalo; Muhammad Rezki Rasyak; Safarina G Malik; Sukma Oktavianthi; Willy Agustine                                                                                                                                                                                                                                                                                                                                                                                                                                                                      |
| EPI_ISL_3278299                                                                                                                                                                                                                                                                                                                                                                                                                                                                            | RS. Moh Ridwan Meuraksa                       | National Institute of Health Research and Development                                                                                                                                                                                                                                                                                                                                                                                                  | Arie Ardiansyah Nugraha; Hana Aparsi Pawestri; Hartanti Dian Ikawati; Kartika Dewi Puspa; Krisna Pangesti; Nelly Puspandari; Subangkit; Triyani Soekarso; Vivi Setiawaty                                                                                                                                                                                                                                                                                                                                                                                                                                                                                                                         |
| EPI_ISL_3138785                                                                                                                                                                                                                                                                                                                                                                                                                                                                            | RS. Moh Ridwan Meuraksa.                      | National Institute of Health Research and Development                                                                                                                                                                                                                                                                                                                                                                                                  | Arie Ardiansyah Nugraha; Fajar Nur Sulistiyohadi; Hana Aparsi Pawestri; Hartanti Dian Ikawati; Kartika Dewi Puspa; Krisna Pangesti; Nelly Puspandari; Subangkit; Triyani Soekarso; Vivi Setiawaty                                                                                                                                                                                                                                                                                                                                                                                                                                                                                                |
| EPI_ISL_4779276                                                                                                                                                                                                                                                                                                                                                                                                                                                                            | RS. Muhammadiyah Rodliyah Achid Moga Pemalang | Balai Laboratorium Kesehatan Dan Pengujian Alat Kesehatan Provinsi Jawa Tengah                                                                                                                                                                                                                                                                                                                                                                         | Alia Wijayanti; Dwi Nursetyaasih; Dyah Ayu; Endah Wahyu Y; Ismi Farhati; Purnomo; Sekti Handayani; Wiwik Peni; Yekti Hediningsih                                                                                                                                                                                                                                                                                                                                                                                                                                                                                                                                                                 |
| EPI_ISL_5616563, EPI_ISL_5616620                                                                                                                                                                                                                                                                                                                                                                                                                                                           | RS. Panti Rahayu Yakkum Purwodadi Grobongan   | Balai Laboratorium Kesehatan dan Pengujian Alat Kesehatan Provinsi Jawa Tengah                                                                                                                                                                                                                                                                                                                                                                         | Alia Wijayanti; Dwi Nursetyaasih; Dyah Ayu; Endah Wahyu Y; Ismi Farhati; Purnomo; Sekti Handayani; Wiwik Peni; Yekti Hediningsih                                                                                                                                                                                                                                                                                                                                                                                                                                                                                                                                                                 |
| EPI_ISL_2955608                                                                                                                                                                                                                                                                                                                                                                                                                                                                            | RSA UGM                                       | Genetics Working Group (Pokja Genetik) Faculty of Medicine, Public Health and Nursing Universitas Gadjah Mada (FK-KMK UGM); Disease Investigation Center Wates Ministry of Agriculture Indonesia; Department of Microbiology FK-KMK UGM; Laboratorium Diagnostik Yayasan Tahija World Mosquito Program (WMP) Yogyakarta Center for Tropical Medicine FK-KMK UGM; Integrated Research Center FK-KMK UGM; Department of Computer Science and Electronics | Afiahayati; Dwi AA Nugrahaningsih; Dwi Indaryati; Dyah A Puspitarani; Edwin W. Daniwijaya; Eggi Arguni; Endah Supriyati; Gunadi; Hendra Wibawa; Indarto Sulistiyono; Kristy Iskandar; Ludhang P. Rizki; Marcellus; Mohamad S. Hakim; Nungki Anggorowati; Pramesti G Dewi; Siswanto; Susan Simanjaya; Titik Nuryastuti; Tri Wibawa                                                                                                                                                                                                                                                                                                                                                                |

|                                                                                                                                                                                                                                                                                                                                                                                                                                                                                                                                                                                                                                                                                                                                                                                                                                                                                                                                                                                                                                                                                                                                |                                                                                                                                                                                                                                                                                                                                                                                                  |                                                                                                                                                                                                                                                                                                                                                                                                                                                                                     |                                                                                                                                                                                                                                                                                                                                                                                                                                                  |
|--------------------------------------------------------------------------------------------------------------------------------------------------------------------------------------------------------------------------------------------------------------------------------------------------------------------------------------------------------------------------------------------------------------------------------------------------------------------------------------------------------------------------------------------------------------------------------------------------------------------------------------------------------------------------------------------------------------------------------------------------------------------------------------------------------------------------------------------------------------------------------------------------------------------------------------------------------------------------------------------------------------------------------------------------------------------------------------------------------------------------------|--------------------------------------------------------------------------------------------------------------------------------------------------------------------------------------------------------------------------------------------------------------------------------------------------------------------------------------------------------------------------------------------------|-------------------------------------------------------------------------------------------------------------------------------------------------------------------------------------------------------------------------------------------------------------------------------------------------------------------------------------------------------------------------------------------------------------------------------------------------------------------------------------|--------------------------------------------------------------------------------------------------------------------------------------------------------------------------------------------------------------------------------------------------------------------------------------------------------------------------------------------------------------------------------------------------------------------------------------------------|
| EPI_ISL_902737, EPI_ISL_902749, EPI_ISL_906050, EPI_ISL_906051, EPI_ISL_906052, EPI_ISL_985398                                                                                                                                                                                                                                                                                                                                                                                                                                                                                                                                                                                                                                                                                                                                                                                                                                                                                                                                                                                                                                 | RSA UGM                                                                                                                                                                                                                                                                                                                                                                                          | Genetics Working Group (Pokja Genetik) Faculty of Medicine, Public Health and Nursing Universitas Gadjah Mada (FK-KMK UGM); Disease Investigation Center Wates Ministry of Agriculture Indonesia; Department of Microbiology FK-KMK UGM; Laboratorium Diagnostik Yayasan Tahija World Mosquito Program (WMP) Yogyakarta Center for Tropical Medicine FK-KMK UGM; Integrated Research center FK-KMK UGM; Department of Computer Science and Electronics FMIPA UGM                    | Aditya Rifqi Fauzi; Afiahayati; Alvin Santoso Kalim; Dwi AA Nugrahainingsih; Dwiki Afandy; Dwiki afandy; Dyah Ayu Puspitarani; Edwin W. Daniwijaya; Eggi Arguni; Endah Supriyati; Fadil Fahri; Gunadi; Hendra Wibawa; Kemala Athollah; Kristy Iskandar; Ludhang P. Rizki; Marcellus; Maria Patricia Inggriani; Mohamad S. Hakim; Nungki Anggorowati; Siswanto; Susan Simanjaya; Titik Nuryastuti; Tri Wibawa; Untung Riawan; William Widitjiarso |
| EPI_ISL_576145                                                                                                                                                                                                                                                                                                                                                                                                                                                                                                                                                                                                                                                                                                                                                                                                                                                                                                                                                                                                                                                                                                                 | RSA Universitas Gadjah Mada                                                                                                                                                                                                                                                                                                                                                                      | Genetics Working Group (Pokja Genetik) Faculty of Medicine, Public Health and Nursing Universitas Gadjah Mada (FK-KMK UGM); Disease Investigation Center Wates Ministry of Agriculture Indonesia; Department of Microbiology FK-KMK UGM; Laboratorium Diagnostik Yayasan Tahija World Mosquito Program (WMP) Yogyakarta Center for Tropical Medicine FK-KMK UGM; Integrated Research Center FK-KMK UGM; Department of Computer Science and Electronics FMIPA UGM                    | Afiahayati; Dwi AA Nugrahainingsih; Edwin W. Daniwijaya; Eggi Arguni; Endah Supriyati; Fadil Fahri; Gunadi; Hendra Wibawa; Kristy Iskandar; Ludhang P. Rizki; Marcellus; Mohamad S. Hakim; Nungki Anggorowati; Siswanto; Titik Nuryastuti; Tri Wibawa; William Widitjiarso                                                                                                                                                                       |
| EPI_ISL_3548630, EPI_ISL_3548631, EPI_ISL_3548632, EPI_ISL_3548637, EPI_ISL_3548638, EPI_ISL_3548639, EPI_ISL_3548641, EPI_ISL_3548642, EPI_ISL_3548643, EPI_ISL_3548644, EPI_ISL_3548645, EPI_ISL_3548646, EPI_ISL_3548647, EPI_ISL_3548648, EPI_ISL_3548649, EPI_ISL_3548650, EPI_ISL_3548651, EPI_ISL_3548652, EPI_ISL_3548653, EPI_ISL_3548654, EPI_ISL_3548655, EPI_ISL_3548656, EPI_ISL_3548657, EPI_ISL_3548658, EPI_ISL_3548659, EPI_ISL_3548660, EPI_ISL_3548661, EPI_ISL_3548662, EPI_ISL_3548663, EPI_ISL_3548664, EPI_ISL_3548665, EPI_ISL_3548666, EPI_ISL_3548667, EPI_ISL_3548668, EPI_ISL_3548669, EPI_ISL_3548670, EPI_ISL_3548671, EPI_ISL_3548672, EPI_ISL_3548673, EPI_ISL_3548675, EPI_ISL_3548676, EPI_ISL_3548677, EPI_ISL_3548678, EPI_ISL_3548679, EPI_ISL_3548680, EPI_ISL_3548681, EPI_ISL_3548682, EPI_ISL_3548683, EPI_ISL_3548684, EPI_ISL_3730776, EPI_ISL_3730777, EPI_ISL_3730779, EPI_ISL_3730780, EPI_ISL_3730782, EPI_ISL_3730802, EPI_ISL_5462135, EPI_ISL_5462136, EPI_ISL_5462137, EPI_ISL_5462138                                                                                      | Anna Christina Brazia; Annisa Muthiah Sukirman; Anuraj Shankar; Ariel Pradipta; Carissa Sintca Wijaya; Dhahlia Agustina Cahyono; Dwi Oktavia; Esti Rahayuning Tias; Gracia Felias Enos Korompis; Himawan Masyhuri; Louisa Markus; Meutia Ayuputeri Kumaheri; Neng Hilma Hamidah; Ngabila Salama; Ni Sayu Dewi Budhiyani; Reinhart Gabriel; Stefanus Bernard; Tiranti Vindha; Vania Gavrla Wikasa |                                                                                                                                                                                                                                                                                                                                                                                                                                                                                     |                                                                                                                                                                                                                                                                                                                                                                                                                                                  |
| see above                                                                                                                                                                                                                                                                                                                                                                                                                                                                                                                                                                                                                                                                                                                                                                                                                                                                                                                                                                                                                                                                                                                      | RSAB HARAPAN KITA                                                                                                                                                                                                                                                                                                                                                                                | Genomik Solidaritas Indonesia Laboratorium                                                                                                                                                                                                                                                                                                                                                                                                                                          | Amin Soebandrio; Edison Johar; Frilasita A Yudhaputri; Hidayat Trimarsanto; Iskandar Adnan; Khin Saw Myint; Lydia V. Panggalo; Muhammad Rezki Rasyak; Safarina G Malik; Sukma Oktavianthi; Willy Agustine                                                                                                                                                                                                                                        |
| EPI_ISL_1284140, EPI_ISL_1284145, EPI_ISL_1622376, EPI_ISL_1622377, EPI_ISL_1622397, EPI_ISL_1622398, EPI_ISL_1622399                                                                                                                                                                                                                                                                                                                                                                                                                                                                                                                                                                                                                                                                                                                                                                                                                                                                                                                                                                                                          | RSAB Harapan Kita                                                                                                                                                                                                                                                                                                                                                                                | Eijkman Institute for Molecular Biology, Ministry of Research and Technology/National Agency for Research and Innovation                                                                                                                                                                                                                                                                                                                                                            | Amin Soebandrio; Edison Johar; Frilasita A Yudhaputri; Hidayat Trimarsanto; Iskandar Adnan; Khin Saw Myint; Lidwina Priliani; Lydia V. Panggalo; Muhammad Rezki Rasyak; Safarina G Malik; Sukma Oktavianthi; Willy Agustine                                                                                                                                                                                                                      |
| EPI_ISL_2614678                                                                                                                                                                                                                                                                                                                                                                                                                                                                                                                                                                                                                                                                                                                                                                                                                                                                                                                                                                                                                                                                                                                | RSAB Harapan Kita                                                                                                                                                                                                                                                                                                                                                                                | Eijkman Institute for Molecular Biology, National Research and Innovation Agency                                                                                                                                                                                                                                                                                                                                                                                                    | Amin Soebandrio; Edison Johar; Frilasita A Yudhaputri; Hidayat Trimarsanto; Iskandar Adnan; Khin Saw Myint; Lidwina Priliani; Lydia V. Panggalo; Muhammad Rezki Rasyak; Safarina G Malik; Sukma Oktavianthi; Willy Agustine                                                                                                                                                                                                                      |
| EPI_ISL_5462139                                                                                                                                                                                                                                                                                                                                                                                                                                                                                                                                                                                                                                                                                                                                                                                                                                                                                                                                                                                                                                                                                                                | RSAB Harapan Kita                                                                                                                                                                                                                                                                                                                                                                                | Genomik Solidaritas Indonesia Laboratorium                                                                                                                                                                                                                                                                                                                                                                                                                                          | Annisa Muthiah Sukirman; Anuraj Shankar; Ariel Pradipta; Esti Rahayuning Tias; Gracia Felias Enos Korompis; Himawan Masyhuri; Louisa Markus; Meutia Ayuputeri Kumaheri; Ni Sayu Dewi Budhiyani; Stefanus Bernard; Vania Gavrla Wikasa                                                                                                                                                                                                            |
| EPI_ISL_529138                                                                                                                                                                                                                                                                                                                                                                                                                                                                                                                                                                                                                                                                                                                                                                                                                                                                                                                                                                                                                                                                                                                 | RSAL Dr. Ramelan Surabaya                                                                                                                                                                                                                                                                                                                                                                        | Institute of Tropical Disease, Universitas Airlangga                                                                                                                                                                                                                                                                                                                                                                                                                                | Aldise M Nastri; Gatot Soegiarto; Jezzy R Dewantari; Kazufumi Shimizu; Krisnoadi Rahardjo; Laksmi Wulandari; Maria I Lusida; Mitsuhiro Nishimura; Radito Soesanto; Resti Yudhawati; Retno A Setyoningrum; Rima R Prasetya; Soetjipto; Yasuko Mori; Yohko K Shimizu                                                                                                                                                                               |
| EPI_ISL_3138792, EPI_ISL_3138793, EPI_ISL_3138794                                                                                                                                                                                                                                                                                                                                                                                                                                                                                                                                                                                                                                                                                                                                                                                                                                                                                                                                                                                                                                                                              | RSAU Esnawan Antariksa                                                                                                                                                                                                                                                                                                                                                                           | National Institute of Health Research and Development                                                                                                                                                                                                                                                                                                                                                                                                                               | Arie Ardiansyah Nugraha; Fajar Nur Sulistiyohadi; Hana Apsari Pawestri; Hartanti Dian Ikawati; Kartika Dewi Puspa; Krisna Pangesti; Nelly Puspandari; Subangkit; Triyani Soekarso; Vivi Setiawaty                                                                                                                                                                                                                                                |
| EPI_ISL_5446152, EPI_ISL_5446156                                                                                                                                                                                                                                                                                                                                                                                                                                                                                                                                                                                                                                                                                                                                                                                                                                                                                                                                                                                                                                                                                               | RSAU dr.M. Salaman                                                                                                                                                                                                                                                                                                                                                                               | Laboratorium Genetik Molekuler, Biomedik Lanjut, FK UNPAD                                                                                                                                                                                                                                                                                                                                                                                                                           | Any Yuliani; Chrysanti Murad; Dwi Agustian; Fensi Amalia; Jessi Annisa; Lidya Chaidir; Nuni Haeruni; Nurul Setia Rahayu; Rima Destya Triatin; Savira Ekawardhani; Shinta; Tri Hanggono Ahmad; Yanu; Yeni Rendieni; Yunia Sribudiani                                                                                                                                                                                                              |
| EPI_ISL_2709384, EPI_ISL_2709388, EPI_ISL_2918608, EPI_ISL_3029996                                                                                                                                                                                                                                                                                                                                                                                                                                                                                                                                                                                                                                                                                                                                                                                                                                                                                                                                                                                                                                                             | RSCM                                                                                                                                                                                                                                                                                                                                                                                             | Eijkman Institute for Molecular Biology, National Research and Innovation Agency                                                                                                                                                                                                                                                                                                                                                                                                    | Amin Soebandrio; Edison Johar; Frilasita A Yudhaputri; Hidayat Trimarsanto; Iskandar Adnan; Khin Saw Myint; Lidwina Priliani; Lydia V. Panggalo; Muhammad Rezki Rasyak; Safarina G Malik; Sukma Oktavianthi; Willy Agustine                                                                                                                                                                                                                      |
| EPI_ISL_2987603, EPI_ISL_2987607, EPI_ISL_2987609, EPI_ISL_3278300, EPI_ISL_4508295, EPI_ISL_4508296, EPI_ISL_4508297, EPI_ISL_4508298, EPI_ISL_4508299, EPI_ISL_4508300, EPI_ISL_4508334, EPI_ISL_4508335, EPI_ISL_4508336, EPI_ISL_4508337, EPI_ISL_5022800, EPI_ISL_5022801, EPI_ISL_5022802, EPI_ISL_5022845, EPI_ISL_5022846, EPI_ISL_5022847, EPI_ISL_5022848, EPI_ISL_5022849, EPI_ISL_5022850, EPI_ISL_5022851, EPI_ISL_5022894, EPI_ISL_5022895, EPI_ISL_5022896, EPI_ISL_5022898, EPI_ISL_5022899, EPI_ISL_5022900, EPI_ISL_5022901, EPI_ISL_5022902, EPI_ISL_5022943, EPI_ISL_5022944, EPI_ISL_5022945, EPI_ISL_5107834, EPI_ISL_5107856, EPI_ISL_5107857, EPI_ISL_5441751, EPI_ISL_5441752, EPI_ISL_5441753, EPI_ISL_5441754, EPI_ISL_5441755, EPI_ISL_5441756, EPI_ISL_5441757, EPI_ISL_5441758, EPI_ISL_5441759, EPI_ISL_5441760, EPI_ISL_5441761, EPI_ISL_5441762, EPI_ISL_5441763, EPI_ISL_5441764, EPI_ISL_5441769, EPI_ISL_5441770, EPI_ISL_5441771, EPI_ISL_5441772, EPI_ISL_5743648, EPI_ISL_5743649, EPI_ISL_5743650, EPI_ISL_5743654, EPI_ISL_5743663, EPI_ISL_5743682, EPI_ISL_5743778, EPI_ISL_5743780 | National Institute of Health Research and Development                                                                                                                                                                                                                                                                                                                                            | Arie Ardiansyah Nugraha; Fajar Nur Sulistiyohadi; Hana Apsari Pawestri; Hartanti Dian Ikawati; Kartika Dewi Puspa; Krisna Pangesti; Nelly Puspandari; Subangkit; Triyani Soekarso; Vivi Setiawaty                                                                                                                                                                                                                                                                                   |                                                                                                                                                                                                                                                                                                                                                                                                                                                  |
| EPI_ISL_759968                                                                                                                                                                                                                                                                                                                                                                                                                                                                                                                                                                                                                                                                                                                                                                                                                                                                                                                                                                                                                                                                                                                 | RSI Darus Syifa'                                                                                                                                                                                                                                                                                                                                                                                 | Institute of Tropical Disease, Universitas Airlangga                                                                                                                                                                                                                                                                                                                                                                                                                                | Aldise M Nastri; Gatot Soegiarto; HM Faiz; Jezzy R Dewantari; Kazufumi Shimizu; Krisnoadi Rahardjo; Laksmi Wulandari; Maria I Lusida; Resti Yudhawati; Rima R Prasetya; Soetjipto; Yasuko Mori                                                                                                                                                                                                                                                   |
| EPI_ISL_4969084                                                                                                                                                                                                                                                                                                                                                                                                                                                                                                                                                                                                                                                                                                                                                                                                                                                                                                                                                                                                                                                                                                                | RSI NU Demak                                                                                                                                                                                                                                                                                                                                                                                     | Genetics Working Group (Pokja Genetik) Faculty of Medicine, Public Health and Nursing Universitas Gadjah Mada (FK-KMK UGM); Disease Investigation Center Wates Ministry of Agriculture Indonesia; Department of Microbiology FK-KMK UGM; Laboratorium Diagnostik Yayasan Tahija World Mosquito Program (WMP) Yogyakarta Center for Tropical Medicine FK-KMK UGM; Integrated Research Center FK-KMK UGM; Department of Computer Science and Electronics FMIPA UGM; RSUP Dr. Sardjito | Afiahayati; Alvina A Setiawan; Dwi AA Nugrahainingsih; Dwi Indaryati; Edwin W. Daniwijaya; Eggi Arguni; Endah Supriyati; Gunadi; Hendra Wibawa; Indarto Sulistiyono; Khanza a Vujira; Kristy Iskandar; Ludhang P. Rizki; Marcellus; Mohamad S. Hakim; Nungki Anggorowati; Pramesti G Dewi; Siswanto; Titik Nuryastuti; Tri Wibawa                                                                                                                |
| EPI_ISL_2364656                                                                                                                                                                                                                                                                                                                                                                                                                                                                                                                                                                                                                                                                                                                                                                                                                                                                                                                                                                                                                                                                                                                | RSIA Assyifa                                                                                                                                                                                                                                                                                                                                                                                     | Eijkman Institute for Molecular Biology, National Agency for Research and Innovation                                                                                                                                                                                                                                                                                                                                                                                                | Amin Soebandrio; Edison Johar; Frilasita A Yudhaputri; Hidayat Trimarsanto; Iskandar Adnan; Khin Saw Myint; Lidwina Priliani; Lydia V. Panggalo; Muhammad Rezki Rasyak; Safarina G Malik; Sukma Oktavianthi; Willy Agustine                                                                                                                                                                                                                      |
| EPI_ISL_3730785, EPI_ISL_3730787, EPI_ISL_3946309, EPI_ISL_3946310, EPI_ISL_3946311                                                                                                                                                                                                                                                                                                                                                                                                                                                                                                                                                                                                                                                                                                                                                                                                                                                                                                                                                                                                                                            | RSIA Budhi Jaya                                                                                                                                                                                                                                                                                                                                                                                  | Genomik Solidaritas Indonesia Laboratorium                                                                                                                                                                                                                                                                                                                                                                                                                                          | Anna Christina Brazia; Annisa Muthiah Sukirman; Anuraj Shankar; Ariel Pradipta; Carissa Sintca Wijaya; Dhahlia Agustina Cahyono; Dwi Oktavia; Gracia Felias Enos Korompis; Himawan Masyhuri; Louisa Markus; Lulu Nursyifa; Meutia Ayuputeri Kumaheri; Neng Hilma Hamidah; Ngabila Salama; Pratiwi Srikanadi Yudhastari; Reinhart Gabriel; Tiranti Vindha; Vania Gavrla Wikasa                                                                    |
| EPI_ISL_1622378                                                                                                                                                                                                                                                                                                                                                                                                                                                                                                                                                                                                                                                                                                                                                                                                                                                                                                                                                                                                                                                                                                                | RSIA Bun                                                                                                                                                                                                                                                                                                                                                                                         | Eijkman Institute for Molecular Biology, Ministry of Research and Technology/National Agency for Research and Innovation                                                                                                                                                                                                                                                                                                                                                            | Amin Soebandrio; Edison Johar; Frilasita A Yudhaputri; Hidayat Trimarsanto; Iskandar Adnan; Khin Saw Myint; Lydia V. Panggalo; Muhammad Rezki Rasyak; Safarina G Malik; Sukma Oktavianthi; Willy Agustine                                                                                                                                                                                                                                        |
| EPI_ISL_1283996, EPI_ISL_1284149, EPI_ISL_1284152                                                                                                                                                                                                                                                                                                                                                                                                                                                                                                                                                                                                                                                                                                                                                                                                                                                                                                                                                                                                                                                                              | RSIA Bunda Sejahtera                                                                                                                                                                                                                                                                                                                                                                             | Eijkman Institute for Molecular Biology, Ministry of Research and Technology/National Agency for Research and Innovation                                                                                                                                                                                                                                                                                                                                                            | Amin Soebandrio; Edison Johar; Frilasita A Yudhaputri; Hidayat Trimarsanto; Iskandar Adnan; Khin Saw Myint; Lydia V. Panggalo; Safarina G Malik; Sukma Oktavianthi; Willy Agustine                                                                                                                                                                                                                                                               |
| EPI_ISL_2364598                                                                                                                                                                                                                                                                                                                                                                                                                                                                                                                                                                                                                                                                                                                                                                                                                                                                                                                                                                                                                                                                                                                | RSIA Bunda Sejahtera                                                                                                                                                                                                                                                                                                                                                                             | Eijkman Institute for Molecular Biology, National Agency for Research and Innovation                                                                                                                                                                                                                                                                                                                                                                                                | Amin Soebandrio; Edison Johar; Frilasita A Yudhaputri; Hidayat Trimarsanto; Iskandar Adnan; Khin Saw Myint; Lidwina Priliani; Lydia V. Panggalo; Muhammad Rezki Rasyak; Safarina G Malik; Sukma Oktavianthi; Willy Agustine                                                                                                                                                                                                                      |
| EPI_ISL_947284                                                                                                                                                                                                                                                                                                                                                                                                                                                                                                                                                                                                                                                                                                                                                                                                                                                                                                                                                                                                                                                                                                                 | RSIA Bunda Sejati                                                                                                                                                                                                                                                                                                                                                                                | Eijkman Institute for Molecular Biology, Ministry of Research and Technology/National Agency for Research and Innovation                                                                                                                                                                                                                                                                                                                                                            | Amin Soebandrio; Edison Johar; Frilasita A Yudhaputri; Hidayat Trimarsanto; Iskandar Adnan; Khin Saw Myint; Lydia V. Panggalo; Safarina G Malik; Sukma Oktavianthi; Willy Agustine                                                                                                                                                                                                                                                               |
| EPI_ISL_2614716                                                                                                                                                                                                                                                                                                                                                                                                                                                                                                                                                                                                                                                                                                                                                                                                                                                                                                                                                                                                                                                                                                                | RSIA Bunda Sejati                                                                                                                                                                                                                                                                                                                                                                                | Eijkman Institute for Molecular Biology, National Research and Innovation Agency                                                                                                                                                                                                                                                                                                                                                                                                    | Amin Soebandrio; Edison Johar; Frilasita A Yudhaputri; Hidayat Trimarsanto; Iskandar Adnan; Khin Saw Myint; Lidwina Priliani; Lydia V. Panggalo; Muhammad Rezki Rasyak; Safarina G Malik; Sukma Oktavianthi; Willy Agustine                                                                                                                                                                                                                      |
| EPI_ISL_3030054                                                                                                                                                                                                                                                                                                                                                                                                                                                                                                                                                                                                                                                                                                                                                                                                                                                                                                                                                                                                                                                                                                                | RSIA Grla Bunda, Dinas Kesehatan Kota Bandung                                                                                                                                                                                                                                                                                                                                                    | Eijkman Institute for Molecular Biology, National Research and Innovation Agency; West Java Health Laboratory                                                                                                                                                                                                                                                                                                                                                                       | Ade Fany Saffiri; Amin Soebandrio; Azzania Fibriani; Cut Nur Cinthia Alamanda; Edison Johar; Ema Rahmawati; Frilasita A Yudhaputri; Hidayat Trimarsanto; Husna Nugrahapraja; Iskandar Adnan; Khin Saw Myint; Lidwina Priliani; Lydia V. Panggalo; Muhammad Rezki Rasyak; Ranza Fadhili Pratama; Rifky Waluyajati Rachman; Ryan Bayusantika Ristandi; Safarina G Malik; Sukma Oktavianthi; Tati Sutarti Sastrowiyoto; Willy Agustine              |
| EPI_ISL_889021, EPI_ISL_1622392                                                                                                                                                                                                                                                                                                                                                                                                                                                                                                                                                                                                                                                                                                                                                                                                                                                                                                                                                                                                                                                                                                | RSIA Kenari Graha Medika                                                                                                                                                                                                                                                                                                                                                                         | Eijkman Institute for Molecular Biology, Ministry of Research and Technology/National Agency for Research and Innovation                                                                                                                                                                                                                                                                                                                                                            | Amin Soebandrio; Edison Johar; Frilasita A Yudhaputri; Hidayat Trimarsanto; Iskandar Adnan; Khin Saw Myint; Lydia V. Panggalo; Muhammad Rezki Rasyak; Safarina G Malik; Sukma Oktavianthi; Willy Agustine                                                                                                                                                                                                                                        |
| EPI_ISL_947287, EPI_ISL_947325, EPI_ISL_1284074, EPI_ISL_1284076                                                                                                                                                                                                                                                                                                                                                                                                                                                                                                                                                                                                                                                                                                                                                                                                                                                                                                                                                                                                                                                               | RSIA PKU Muhammadiyah                                                                                                                                                                                                                                                                                                                                                                            | Eijkman Institute for Molecular Biology, Ministry of Research and Technology/National Agency for Research and Innovation                                                                                                                                                                                                                                                                                                                                                            | Amin Soebandrio; Edison Johar; Frilasita A Yudhaputri; Hidayat Trimarsanto; Iskandar Adnan; Khin Saw Myint; Lydia V. Panggalo; Safarina G Malik; Sukma Oktavianthi; Willy Agustine                                                                                                                                                                                                                                                               |
| EPI_ISL_2364666, EPI_ISL_2364669                                                                                                                                                                                                                                                                                                                                                                                                                                                                                                                                                                                                                                                                                                                                                                                                                                                                                                                                                                                                                                                                                               | RSIA PKU Muhammadiyah                                                                                                                                                                                                                                                                                                                                                                            | Eijkman Institute for Molecular Biology, National Agency for Research and Innovation                                                                                                                                                                                                                                                                                                                                                                                                | Amin Soebandrio; Edison Johar; Frilasita A Yudhaputri; Hidayat Trimarsanto; Iskandar Adnan; Khin Saw Myint; Lidwina Priliani; Lydia V. Panggalo; Muhammad Rezki Rasyak; Safarina G Malik; Sukma Oktavianthi; Willy Agustine                                                                                                                                                                                                                      |
| EPI_ISL_889019, EPI_ISL_947273, EPI_ISL_1283923, EPI_ISL_1283924                                                                                                                                                                                                                                                                                                                                                                                                                                                                                                                                                                                                                                                                                                                                                                                                                                                                                                                                                                                                                                                               | RSIA Sayyidah                                                                                                                                                                                                                                                                                                                                                                                    | Eijkman Institute for Molecular Biology, Ministry of Research and Technology/National Agency for Research and Innovation                                                                                                                                                                                                                                                                                                                                                            | Amin Soebandrio; Edison Johar; Frilasita A Yudhaputri; Hidayat Trimarsanto; Iskandar Adnan; Khin Saw Myint; Lydia V. Panggalo; Safarina G Malik; Sukma Oktavianthi; Willy Agustine                                                                                                                                                                                                                                                               |
| EPI_ISL_1283957, EPI_ISL_1283970, EPI_ISL_1284178, EPI_ISL_1622370, EPI_ISL_1622435                                                                                                                                                                                                                                                                                                                                                                                                                                                                                                                                                                                                                                                                                                                                                                                                                                                                                                                                                                                                                                            | RSIA Selasih Medika                                                                                                                                                                                                                                                                                                                                                                              | Eijkman Institute for Molecular Biology, Ministry of Research and Technology/National Agency for Research and Innovation                                                                                                                                                                                                                                                                                                                                                            | Amin Soebandrio; Edison Johar; Frilasita A Yudhaputri; Hidayat Trimarsanto; Iskandar Adnan; Khin Saw Myint; Lydia V. Panggalo; Muhammad Rezki Rasyak; Safarina G Malik; Sukma Oktavianthi; Willy Agustine                                                                                                                                                                                                                                        |
| EPI_ISL_2614680                                                                                                                                                                                                                                                                                                                                                                                                                                                                                                                                                                                                                                                                                                                                                                                                                                                                                                                                                                                                                                                                                                                | RSIA Selasih Medika                                                                                                                                                                                                                                                                                                                                                                              | Eijkman Institute for Molecular Biology, National Research and Innovation Agency                                                                                                                                                                                                                                                                                                                                                                                                    | Amin Soebandrio; Edison Johar; Frilasita A Yudhaputri; Hidayat Trimarsanto; Iskandar Adnan; Khin Saw Myint; Lidwina Priliani; Lydia V. Panggalo; Muhammad Rezki Rasyak; Safarina G Malik; Sukma Oktavianthi; Willy Agustine                                                                                                                                                                                                                      |
| EPI_ISL_1284087, EPI_ISL_1284182, EPI_ISL_1284296, EPI_ISL_1622368, EPI_ISL_1622386, EPI_ISL_1622393, EPI_ISL_1622423, EPI_ISL_1622433                                                                                                                                                                                                                                                                                                                                                                                                                                                                                                                                                                                                                                                                                                                                                                                                                                                                                                                                                                                         |                                                                                                                                                                                                                                                                                                                                                                                                  |                                                                                                                                                                                                                                                                                                                                                                                                                                                                                     |                                                                                                                                                                                                                                                                                                                                                                                                                                                  |
| see above                                                                                                                                                                                                                                                                                                                                                                                                                                                                                                                                                                                                                                                                                                                                                                                                                                                                                                                                                                                                                                                                                                                      | RSJ Dr. Soeharto Heerdjan                                                                                                                                                                                                                                                                                                                                                                        | Eijkman Institute for Molecular Biology, Ministry of Research and Technology/National Agency for Research and Innovation                                                                                                                                                                                                                                                                                                                                                            | Amin Soebandrio; Edison Johar; Frilasita A Yudhaputri; Hidayat Trimarsanto; Iskandar Adnan; Khin Saw Myint; Lydia V. Panggalo; Muhammad Rezki Rasyak; Safarina G Malik; Sukma Oktavianthi; Willy Agustine                                                                                                                                                                                                                                        |
| EPI_ISL_2364583, EPI_ISL_2364672                                                                                                                                                                                                                                                                                                                                                                                                                                                                                                                                                                                                                                                                                                                                                                                                                                                                                                                                                                                                                                                                                               | RSJ Dr. Soeharto Heerdjan                                                                                                                                                                                                                                                                                                                                                                        | Eijkman Institute for Molecular Biology, National Agency for Research and Innovation                                                                                                                                                                                                                                                                                                                                                                                                | Amin Soebandrio; Edison Johar; Frilasita A Yudhaputri; Hidayat Trimarsanto; Iskandar Adnan; Khin Saw Myint; Lidwina Priliani; Lydia V. Panggalo; Muhammad Rezki Rasyak; Safarina G Malik; Sukma Oktavianthi; Willy Agustine                                                                                                                                                                                                                      |
| EPI_ISL_2614658, EPI_ISL_2614659, EPI_ISL_2614663, EPI_ISL_2614664, EPI_ISL_2614677, EPI_ISL_2614691, EPI_ISL_2614705, EPI_ISL_2614709                                                                                                                                                                                                                                                                                                                                                                                                                                                                                                                                                                                                                                                                                                                                                                                                                                                                                                                                                                                         |                                                                                                                                                                                                                                                                                                                                                                                                  |                                                                                                                                                                                                                                                                                                                                                                                                                                                                                     |                                                                                                                                                                                                                                                                                                                                                                                                                                                  |
| see above                                                                                                                                                                                                                                                                                                                                                                                                                                                                                                                                                                                                                                                                                                                                                                                                                                                                                                                                                                                                                                                                                                                      | RSJ Dr. Soeharto Heerdjan                                                                                                                                                                                                                                                                                                                                                                        | Eijkman Institute for Molecular Biology, National Research and Innovation Agency                                                                                                                                                                                                                                                                                                                                                                                                    | Amin Soebandrio; Edison Johar; Frilasita A Yudhaputri; Hidayat Trimarsanto; Iskandar Adnan; Khin Saw Myint; Lidwina Priliani; Lydia V. Panggalo; Muhammad Rezki Rasyak; Safarina G Malik; Sukma Oktavianthi; Willy Agustine                                                                                                                                                                                                                      |
| EPI_ISL_5021103, EPI_ISL_5021107, EPI_ISL_5021113, EPI_ISL_5021118, EPI_ISL_5021127, EPI_ISL_5021132, EPI_ISL_5021137, EPI_ISL_5021145, EPI_ISL_5021147                                                                                                                                                                                                                                                                                                                                                                                                                                                                                                                                                                                                                                                                                                                                                                                                                                                                                                                                                                        |                                                                                                                                                                                                                                                                                                                                                                                                  |                                                                                                                                                                                                                                                                                                                                                                                                                                                                                     |                                                                                                                                                                                                                                                                                                                                                                                                                                                  |
| see above                                                                                                                                                                                                                                                                                                                                                                                                                                                                                                                                                                                                                                                                                                                                                                                                                                                                                                                                                                                                                                                                                                                      | RSJ Dr. Soeharto Heerdjan                                                                                                                                                                                                                                                                                                                                                                        | Eijkman Research Center for Molecular Biology, National Research and Innovation Agency                                                                                                                                                                                                                                                                                                                                                                                              | Amin Soebandrio; Edison Johar; Frilasita A Yudhaputri; Hidayat Trimarsanto; Iskandar Adnan; Jessica R Saragih; Khin Saw Myint; Lidwina Priliani; Lydia V Panggalo; Muhammad Rezki Rasyak; Safarina G Malik; Sukma Oktavianthi; Willy Agustine                                                                                                                                                                                                    |
| EPI_ISL_4741237                                                                                                                                                                                                                                                                                                                                                                                                                                                                                                                                                                                                                                                                                                                                                                                                                                                                                                                                                                                                                                                                                                                | RSJD Dr Amino Gondohutomo                                                                                                                                                                                                                                                                                                                                                                        | Balai Laboratorium Kesehatan Dan Pengujian Alat Kesehatan Provinsi Jawa Tengah                                                                                                                                                                                                                                                                                                                                                                                                      | Dwi Nursetyaaasih; Dyah Ayu; Endah Wahyu Y. Ismi Farhati; Purnomo; Sekti Handayani; Wiwik Peni; Yekti Hedningsih                                                                                                                                                                                                                                                                                                                                 |
| EPI_ISL_574609, EPI_ISL_766038                                                                                                                                                                                                                                                                                                                                                                                                                                                                                                                                                                                                                                                                                                                                                                                                                                                                                                                                                                                                                                                                                                 | RSJPD Harapan Kita                                                                                                                                                                                                                                                                                                                                                                               | Eijkman Institute for Molecular Biology, Ministry of Research and Technology/National Agency for Research and Innovation                                                                                                                                                                                                                                                                                                                                                            | Amin Soebandrio; David H Muljono; Edison Johar; Frilasita A Yudhaputri; Herawati Sudoyo; Hidayat Trimarsanto; Iskandar A Adnan; Khin Saw Myint; Safarina G Malik; Willy Agustine                                                                                                                                                                                                                                                                 |
| EPI_ISL_2631454, EPI_ISL_2631455, EPI_ISL_2631456, EPI_ISL_2631457, EPI_ISL_2631458, EPI_ISL_2631459, EPI_ISL_2631460, EPI_ISL_2631461, EPI_ISL_2631462, EPI_ISL_2631463                                                                                                                                                                                                                                                                                                                                                                                                                                                                                                                                                                                                                                                                                                                                                                                                                                                                                                                                                       |                                                                                                                                                                                                                                                                                                                                                                                                  |                                                                                                                                                                                                                                                                                                                                                                                                                                                                                     |                                                                                                                                                                                                                                                                                                                                                                                                                                                  |

|                                                                                                                                                                                                                                                                                                                                                                                                                                                                                            |                                             |                                                                                                                                                             |                                                                                                                                                                                                                                                                                                                                                                                                                                                                                                                                          |                                                                                                                                                                                                                                                                                                                                                                                                                                                                             |
|--------------------------------------------------------------------------------------------------------------------------------------------------------------------------------------------------------------------------------------------------------------------------------------------------------------------------------------------------------------------------------------------------------------------------------------------------------------------------------------------|---------------------------------------------|-------------------------------------------------------------------------------------------------------------------------------------------------------------|------------------------------------------------------------------------------------------------------------------------------------------------------------------------------------------------------------------------------------------------------------------------------------------------------------------------------------------------------------------------------------------------------------------------------------------------------------------------------------------------------------------------------------------|-----------------------------------------------------------------------------------------------------------------------------------------------------------------------------------------------------------------------------------------------------------------------------------------------------------------------------------------------------------------------------------------------------------------------------------------------------------------------------|
| see above                                                                                                                                                                                                                                                                                                                                                                                                                                                                                  | RSK Paru Karawang                           | Indonesian Institute of Sciences (LIPI)/National Agency of Research and Innovation (BRIN) and National Institute of Health Research and Development (NIHRD) | ; Anggia Prasetyoputri; Anik B. Dharmayanthi; Eko Wahyu Putro; Fahrurrozi; Herjuno A. Nugroho; Idris; Isa Nuryana; Linda Sukmarini; Listiana Oktavia; Nova D. Yanthi; Puspita Lisdianti; Rath A. Ningrum; Ruby Setiawan; Sri Swasthikawati; Subangkit; Syam B. Iryanto; Vivi Setiawaty; Vivi Setiawaty Puspita Lisdianti; Yayuk Sri Rahayu; Yuliawati                                                                                                                                                                                    |                                                                                                                                                                                                                                                                                                                                                                                                                                                                             |
| EPI_ISL_2931727, EPI_ISL_2931763, EPI_ISL_2931774, EPI_ISL_2931781, EPI_ISL_2931789                                                                                                                                                                                                                                                                                                                                                                                                        | RSKIA Kota Bandung                          | National Institute of Health Research and Development                                                                                                       | ; Arie Ardiansyah Nugraha; Hana Apsari Pawestri; Hartanti Dian Ikawati; Kartika Dewi Puspa; Krisna Pangesti; Nelly Puspandari; Subangkit; Triyani Soekarso; Vivi Setiawaty                                                                                                                                                                                                                                                                                                                                                               |                                                                                                                                                                                                                                                                                                                                                                                                                                                                             |
| EPI_ISL_3308870, EPI_ISL_3308963                                                                                                                                                                                                                                                                                                                                                                                                                                                           | RSPA W                                      | Institute for Vector and Reservoir Control, Research and Development (IVRCRD)- National Institute of Health Research and Development (NIHRD), Indonesia     | Aprilia Safitri; Arief Mulyono; Arif Suryo Prasetyo; Aryo Ardanto; Ayu Pradipta Pratiwi; Dimas Bagus Wicaksono Putro; Dwi Susilo; Esti Rahardianingtyas; Evi sulistyorini; Hana Apsari Pawestri; Joko Waluyo; Kusumaningtyas Sekar Negari; Lulus Susanti; Marjianto; Mega Tyas Prihatin; Muhidin; Mujiyanto; Nur Hidayati; Restu Choirul Saban; Ristiyan; Sidiq Setyo Nugroho; Siti Alfiah; Sri Wahyuni Handayani; Subangkit; Tika Fiona Sari; Triwibowo Ambar Garjito; Vivi Setiawaty; Wimbi Kartika Ratnasari; Yusnita Mirna Anggraeni |                                                                                                                                                                                                                                                                                                                                                                                                                                                                             |
| EPI_ISL_2858700, EPI_ISL_4481519, EPI_ISL_4481523, EPI_ISL_4481548, EPI_ISL_4481557, EPI_ISL_5200491, EPI_ISL_5200500                                                                                                                                                                                                                                                                                                                                                                      | see above                                   | RSPI PROF DR. SULIANTI SAROSO                                                                                                                               | Genomik Solidaritas Indonesia Laboratorium                                                                                                                                                                                                                                                                                                                                                                                                                                                                                               | Ahmad Zoebad Foeady; Alfin Muhammad Abdillah; Anindya Pradipta Susanto; Anna Christina Brazia; Annisa Muthiah Sukirman; Anuraj Shankar; Ariel Pradipta; Carissa Sintca Wijaya; Dhahlia Agustina Cahyono; Dian Tri Wahyudi; Esti Rahayuning Tias; Gracia Felias Enos Korompis; Himawan Masyhuri; Louisa Markus; Meutia Ayuputeri Kumaheri; Normastuti Adhini Tantyo; Pompini Agustina Sitompul; Reinhart Gabriel; Stefanus Bernard; Teguh Sarry Hartono; Vania Gavrla Wikasa |
| EPI_ISL_3548636, EPI_ISL_3548693, EPI_ISL_3548694, EPI_ISL_3548695, EPI_ISL_3548696, EPI_ISL_3548697, EPI_ISL_3945456, EPI_ISL_3945457, EPI_ISL_3945458, EPI_ISL_3945459, EPI_ISL_3945460, EPI_ISL_3945461, EPI_ISL_3945462, EPI_ISL_3945463, EPI_ISL_3945464, EPI_ISL_3945465, EPI_ISL_3945466, EPI_ISL_3945467, EPI_ISL_3945468, EPI_ISL_3945469, EPI_ISL_3945470, EPI_ISL_3945471, EPI_ISL_3945472, EPI_ISL_3945473, EPI_ISL_3945474, EPI_ISL_3945475, EPI_ISL_3945476, EPI_ISL_4730630 | see above                                   | RSPI PROF DR. SULIANTI SAROSO, RS                                                                                                                           | Genomik Solidaritas Indonesia Laboratorium                                                                                                                                                                                                                                                                                                                                                                                                                                                                                               | Anna Christina Brazia; Annisa Muthiah Sukirman; Anuraj Shankar; Ariel Pradipta; Carissa Sintca Wijaya; David Hendra Haryanto; Dhahlia Agustina Cahyono; Dwi Oktavia; Gracia Felias Enos Korompis; Louisa Markus; Meutia Ayuputeri Kumaheri; Neng Hilma Hamidah; Ngabila Salama; Pratiwi Srikandi Yudhastari; Reinhart Gabriel; Teguh Sarry Hartono; Tiranti Vindha; Vania Gavrla Wikasa                                                                                     |
| EPI_ISL_1915566, EPI_ISL_1915567, EPI_ISL_1915568                                                                                                                                                                                                                                                                                                                                                                                                                                          | RSPI Prof DR. Sulianti Saroso Jakarta Utara | National Institute of Health Research and Development                                                                                                       |                                                                                                                                                                                                                                                                                                                                                                                                                                                                                                                                          | Arie Ardiansyah Nugraha; Hana Apsari Pawestri; Hartanti Dian Ikawati; Kartika Dewi Puspa; Krisna Pangesti; Nelly Puspandari; Subangkit; Triyani Soekarso; Vivi Setiawaty                                                                                                                                                                                                                                                                                                    |
| EPI_ISL_3401851, EPI_ISL_3401863, EPI_ISL_3401874, EPI_ISL_3401875, EPI_ISL_3401876, EPI_ISL_3401877, EPI_ISL_3401878, EPI_ISL_3664303                                                                                                                                                                                                                                                                                                                                                     | see above                                   | RSPI Prof DR. Sulianti Saroso, Rs                                                                                                                           | Genomik Solidaritas Indonesia Laboratorium                                                                                                                                                                                                                                                                                                                                                                                                                                                                                               | Annisa Muthiah Sukirman; Anuraj Shankar; Ariel Pradipta; Carissa Sintca Wijaya; Dhahlia Agustina Cahyono; Dwi Oktavia; Gracia Felias Enos Korompis; Himawan Masyhuri; Louisa Markus; Meutia Ayuputeri Kumaheri; Ngabila Salama; Tiranti Vindha; Vania Gavrla Wikasa                                                                                                                                                                                                         |
| EPI_ISL_2987592, EPI_ISL_2987593, EPI_ISL_2987594, EPI_ISL_2987595                                                                                                                                                                                                                                                                                                                                                                                                                         | RSPI Prof dr Sulianti Saroso                | National Institute of Health Research and Development                                                                                                       |                                                                                                                                                                                                                                                                                                                                                                                                                                                                                                                                          | Arie Ardiansyah Nugraha; Fajar Nur Sulistiyohadi; Hana Apsari Pawestri; Hartanti Dian Ikawati; Kartika Dewi Puspa; Krisna Pangesti; Nelly Puspandari; Subangkit; Triyani Soekarso; Vivi Setiawaty                                                                                                                                                                                                                                                                           |
| EPI_ISL_2854770, EPI_ISL_2854771, EPI_ISL_2854772, EPI_ISL_2854773, EPI_ISL_2854774                                                                                                                                                                                                                                                                                                                                                                                                        | RSPI Prof. DR. Sulianti Saroso              | National Institute of Health Research and Development                                                                                                       |                                                                                                                                                                                                                                                                                                                                                                                                                                                                                                                                          | Arie Ardiansyah Nugraha; Hana Apsari Pawestri; Hartanti Dian Ikawati; Kartika Dewi Puspa; Krisna Pangesti; Nelly Puspandari; Subangkit; Triyani Soekarso; Vivi Setiawaty                                                                                                                                                                                                                                                                                                    |
| EPI_ISL_2047574, EPI_ISL_2047575, EPI_ISL_2047576, EPI_ISL_2106984, EPI_ISL_2106985, EPI_ISL_2106986, EPI_ISL_2262269, EPI_ISL_2262271, EPI_ISL_2262273, EPI_ISL_2262283, EPI_ISL_2262285, EPI_ISL_2262288, EPI_ISL_2262289, EPI_ISL_2262291, EPI_ISL_2262295, EPI_ISL_2382416, EPI_ISL_3138813, EPI_ISL_3138814, EPI_ISL_3138815, EPI_ISL_3138816, EPI_ISL_3138817, EPI_ISL_3138818, EPI_ISL_3138819                                                                                      | see above                                   | RSPI Prof. Dr. Sulianti Saroso                                                                                                                              | National Institute of Health Research and Development                                                                                                                                                                                                                                                                                                                                                                                                                                                                                    | Arie Ardiansyah Nugraha; Fajar Nur Sulistiyohadi; Hana Apsari Pawestri; Hartanti Dian Ikawati; Kartika Dewi Puspa; Krisna Pangesti; Nelly Puspandari; Subangkit; Triyani Soekarso; Vivi Setiawaty                                                                                                                                                                                                                                                                           |
| EPI_ISL_1257847, EPI_ISL_1257848, EPI_ISL_1257849, EPI_ISL_1257850                                                                                                                                                                                                                                                                                                                                                                                                                         | RSPI Prof.Dr.Sulianti Saroso                | National Institute of Health Research and Development                                                                                                       |                                                                                                                                                                                                                                                                                                                                                                                                                                                                                                                                          | Arie Ardiansyah Nugraha; Hana Apsari Pawestri; Hartanti Dian Ikawati; Kartika Dewi Puspa; Krisna Pangesti; Nelly Puspandari; Subangkit; Vivi Setiawaty                                                                                                                                                                                                                                                                                                                      |
| EPI_ISL_3333238, EPI_ISL_3333240, EPI_ISL_3333241, EPI_ISL_3333242, EPI_ISL_3333243, EPI_ISL_3333244, EPI_ISL_3333245, EPI_ISL_3333246, EPI_ISL_3333247, EPI_ISL_3333248                                                                                                                                                                                                                                                                                                                   | see above                                   | RSPI SULIANTI SAROSO                                                                                                                                        | Genomik Solidaritas Indonesia Laboratorium                                                                                                                                                                                                                                                                                                                                                                                                                                                                                               | Annisa Muthiah Sukirman; Anuraj Shankar; Ariel Pradipta; Carissa Sintca Wijaya; Dhahlia Agustina Cahyono; Gracia Felias Enos Korompis; Louisa Markus; Meutia Ayuputeri Kumaheri; Reinhart Gabriel; Vania Gavrla Wikasa                                                                                                                                                                                                                                                      |
| EPI_ISL_2868873, EPI_ISL_2868876, EPI_ISL_2868879, EPI_ISL_2868881, EPI_ISL_2868883, EPI_ISL_2868884, EPI_ISL_2868886, EPI_ISL_3138804, EPI_ISL_3138805, EPI_ISL_3138806, EPI_ISL_3138807, EPI_ISL_3138808                                                                                                                                                                                                                                                                                 | see above                                   | RSPI Sulianti Saroso                                                                                                                                        | National Institute of Health Research and Development                                                                                                                                                                                                                                                                                                                                                                                                                                                                                    | Arie Ardiansyah Nugraha; Fajar Nur Sulistiyohadi; Hana Apsari Pawestri; Hartanti Dian Ikawati; Kartika Dewi Puspa; Krisna Pangesti; Nelly Puspandari; Subangkit; Triyani Soekarso; Vivi Setiawaty                                                                                                                                                                                                                                                                           |
| EPI_ISL_1915560, EPI_ISL_1915561                                                                                                                                                                                                                                                                                                                                                                                                                                                           | RSPI Sulianti Saroso Jakarta Utara          | National Institute of Health Research and Development                                                                                                       |                                                                                                                                                                                                                                                                                                                                                                                                                                                                                                                                          | Arie Ardiansyah Nugraha; Hana Apsari Pawestri; Hartanti Dian Ikawati; Kartika Dewi Puspa; Krisna Pangesti; Nelly Puspandari; Subangkit; Triyani Soekarso; Vivi Setiawaty                                                                                                                                                                                                                                                                                                    |
| EPI_ISL_3374704                                                                                                                                                                                                                                                                                                                                                                                                                                                                            | RSU ADHYAKSA                                | Genomik Solidaritas Indonesia Laboratorium                                                                                                                  |                                                                                                                                                                                                                                                                                                                                                                                                                                                                                                                                          | Annisa Muthiah Sukirman; Anuraj Shankar; Ariel Pradipta; Carissa Sintca Wijaya; Dhahlia Agustina Cahyono; Gracia Felias Enos Korompis; Himawan Masyhuri; Louisa Markus; Meutia Ayuputeri Kumaheri; Vania Gavrla Wikasa                                                                                                                                                                                                                                                      |
| EPI_ISL_2709393, EPI_ISL_2709398, EPI_ISL_2709399                                                                                                                                                                                                                                                                                                                                                                                                                                          | RSU Adhyaksa                                | Eijkman Institute for Molecular Biology, National Research and Innovation Agency                                                                            |                                                                                                                                                                                                                                                                                                                                                                                                                                                                                                                                          | Amin Soebandrio; Edison Johar; Frilasita A Yudhaputri; Hidayat Trimarsanto; Iskandar Adnan; Khin Saw Myint; Lidwina Priliani; Lydia V. Panggalo; Muhammad Rezki Rasyak; Safarina G Malik; Sukma Oktavianthi; Willy Agustine                                                                                                                                                                                                                                                 |
| EPI_ISL_947268                                                                                                                                                                                                                                                                                                                                                                                                                                                                             | RSU Anggrek Mas                             | Eijkman Institute for Molecular Biology, Ministry of Research and Technology/National Agency for Research and Innovation                                    |                                                                                                                                                                                                                                                                                                                                                                                                                                                                                                                                          | Amin Soebandrio; Edison Johar; Frilasita A Yudhaputri; Hidayat Trimarsanto; Iskandar Adnan; Khin Saw Myint; Lydia V. Panggalo; Safarina G Malik; Sukma Oktavianthi; Willy Agustine                                                                                                                                                                                                                                                                                          |
| EPI_ISL_888997                                                                                                                                                                                                                                                                                                                                                                                                                                                                             | RSU Asyasyifaa                              | Eijkman Institute for Molecular Biology, Ministry of Research and Technology/National Agency for Research and Innovation                                    |                                                                                                                                                                                                                                                                                                                                                                                                                                                                                                                                          | Amin Soebandrio; Edison Johar; Frilasita A Yudhaputri; Hidayat Trimarsanto; Iskandar Adnan; Khin Saw Myint; Lydia V. Panggalo; Safarina G Malik; Sukma Oktavianthi; Willy Agustine                                                                                                                                                                                                                                                                                          |
| EPI_ISL_889001, EPI_ISL_1284040, EPI_ISL_1284169, EPI_ISL_1284172                                                                                                                                                                                                                                                                                                                                                                                                                          | RSU Azra                                    | Eijkman Institute for Molecular Biology, Ministry of Research and Technology/National Agency for Research and Innovation                                    |                                                                                                                                                                                                                                                                                                                                                                                                                                                                                                                                          | Amin Soebandrio; Edison Johar; Frilasita A Yudhaputri; Hidayat Trimarsanto; Iskandar Adnan; Khin Saw Myint; Lydia V. Panggalo; Safarina G Malik; Sukma Oktavianthi; Willy Agustine                                                                                                                                                                                                                                                                                          |
| EPI_ISL_888986                                                                                                                                                                                                                                                                                                                                                                                                                                                                             | RSU Bhakti Kartini                          | Eijkman Institute for Molecular Biology, Ministry of Research and Technology/National Agency for Research and Innovation                                    |                                                                                                                                                                                                                                                                                                                                                                                                                                                                                                                                          | Amin Soebandrio; Edison Johar; Frilasita A Yudhaputri; Hidayat Trimarsanto; Iskandar Adnan; Khin Saw Myint; Lydia V. Panggalo; Safarina G Malik; Sukma Oktavianthi; Willy Agustine                                                                                                                                                                                                                                                                                          |
| EPI_ISL_947247, EPI_ISL_947260, EPI_ISL_947312, EPI_ISL_947329, EPI_ISL_947330                                                                                                                                                                                                                                                                                                                                                                                                             | RSU Bunda Mulia                             | Eijkman Institute for Molecular Biology, Ministry of Research and Technology/National Agency for Research and Innovation                                    |                                                                                                                                                                                                                                                                                                                                                                                                                                                                                                                                          | Amin Soebandrio; Edison Johar; Frilasita A Yudhaputri; Hidayat Trimarsanto; Iskandar Adnan; Khin Saw Myint; Lydia V. Panggalo; Safarina G Malik; Sukma Oktavianthi; Willy Agustine                                                                                                                                                                                                                                                                                          |
| EPI_ISL_1283973                                                                                                                                                                                                                                                                                                                                                                                                                                                                            | RSU Bunda Mulia Cikarang                    | Eijkman Institute for Molecular Biology, Ministry of Research and Technology/National Agency for Research and Innovation                                    |                                                                                                                                                                                                                                                                                                                                                                                                                                                                                                                                          | Amin Soebandrio; Edison Johar; Frilasita A Yudhaputri; Hidayat Trimarsanto; Iskandar Adnan; Khin Saw Myint; Lydia V. Panggalo; Safarina G Malik; Sukma Oktavianthi; Willy Agustine                                                                                                                                                                                                                                                                                          |
| EPI_ISL_3029933, EPI_ISL_3070863, EPI_ISL_3070864, EPI_ISL_3070865, EPI_ISL_3070866                                                                                                                                                                                                                                                                                                                                                                                                        | RSU Dinda Tangerang                         | Eijkman Institute for Molecular Biology, National Research and Innovation Agency                                                                            |                                                                                                                                                                                                                                                                                                                                                                                                                                                                                                                                          | Amin Soebandrio; Edison Johar; Frilasita A Yudhaputri; Hidayat Trimarsanto; Iskandar Adnan; Khin Saw Myint; Lidwina Priliani; Lydia V. Panggalo; Muhammad Rezki Rasyak; Safarina G Malik; Sukma Oktavianthi; Willy Agustine                                                                                                                                                                                                                                                 |
| EPI_ISL_888996                                                                                                                                                                                                                                                                                                                                                                                                                                                                             | RSU Graha Juanda                            | Eijkman Institute for Molecular Biology, Ministry of Research and Technology/National Agency for Research and Innovation                                    |                                                                                                                                                                                                                                                                                                                                                                                                                                                                                                                                          | Amin Soebandrio; Edison Johar; Frilasita A Yudhaputri; Hidayat Trimarsanto; Iskandar Adnan; Khin Saw Myint; Lydia V. Panggalo; Safarina G Malik; Sukma Oktavianthi; Willy Agustine                                                                                                                                                                                                                                                                                          |
| EPI_ISL_1284000, EPI_ISL_1284064, EPI_ISL_1284109, EPI_ISL_1284114, EPI_ISL_1284118, EPI_ISL_1284299, EPI_ISL_1622387, EPI_ISL_1622400, EPI_ISL_1622415                                                                                                                                                                                                                                                                                                                                    | see above                                   | RSU HGA Depok                                                                                                                                               | Eijkman Institute for Molecular Biology, Ministry of Research and Technology/National Agency for Research and Innovation                                                                                                                                                                                                                                                                                                                                                                                                                 | Amin Soebandrio; Edison Johar; Frilasita A Yudhaputri; Hidayat Trimarsanto; Iskandar Adnan; Khin Saw Myint; Lydia V. Panggalo; Muhammad Rezki Rasyak; Safarina G Malik; Sukma Oktavianthi; Willy Agustine                                                                                                                                                                                                                                                                   |
| EPI_ISL_2364653                                                                                                                                                                                                                                                                                                                                                                                                                                                                            | RSU HGA Depok                               | Eijkman Institute for Molecular Biology, National Agency for Research and Innovation                                                                        |                                                                                                                                                                                                                                                                                                                                                                                                                                                                                                                                          | Amin Soebandrio; Edison Johar; Frilasita A Yudhaputri; Hidayat Trimarsanto; Iskandar Adnan; Khin Saw Myint; Lidwina Priliani; Lydia V. Panggalo; Muhammad Rezki Rasyak; Safarina G Malik; Sukma Oktavianthi; Willy Agustine                                                                                                                                                                                                                                                 |
| EPI_ISL_2614692, EPI_ISL_2614700, EPI_ISL_2709396, EPI_ISL_2709397, EPI_ISL_3029939                                                                                                                                                                                                                                                                                                                                                                                                        | RSU HGA Depok                               | Eijkman Institute for Molecular Biology, National Research and Innovation Agency                                                                            |                                                                                                                                                                                                                                                                                                                                                                                                                                                                                                                                          | Amin Soebandrio; Edison Johar; Frilasita A Yudhaputri; Hidayat Trimarsanto; Iskandar Adnan; Khin Saw Myint; Lidwina Priliani; Lydia V. Panggalo; Muhammad Rezki Rasyak; Safarina G Malik; Sukma Oktavianthi; Willy Agustine                                                                                                                                                                                                                                                 |
| EPI_ISL_889006, EPI_ISL_947304, EPI_ISL_947315, EPI_ISL_1283927, EPI_ISL_1284049, EPI_ISL_1284168, EPI_ISL_1284226, EPI_ISL_1284230, EPI_ISL_1284234, EPI_ISL_1284237                                                                                                                                                                                                                                                                                                                      | see above                                   | RSU Harapan Bunda                                                                                                                                           | Eijkman Institute for Molecular Biology, Ministry of Research and Technology/National Agency for Research and Innovation                                                                                                                                                                                                                                                                                                                                                                                                                 | Amin Soebandrio; Edison Johar; Frilasita A Yudhaputri; Hidayat Trimarsanto; Iskandar Adnan; Khin Saw Myint; Lydia V. Panggalo; Safarina G Malik; Sukma Oktavianthi; Willy Agustine                                                                                                                                                                                                                                                                                          |
| EPI_ISL_2987610, EPI_ISL_2987611                                                                                                                                                                                                                                                                                                                                                                                                                                                           | RSU Hermina Kemayoran                       | National Institute of Health Research and Development                                                                                                       |                                                                                                                                                                                                                                                                                                                                                                                                                                                                                                                                          | Arie Ardiansyah Nugraha; Fajar Nur Sulistiyohadi; Hana Apsari Pawestri; Hartanti Dian Ikawati; Kartika Dewi Puspa; Krisna Pangesti; Nelly Puspandari; Subangkit; Triyani Soekarso; Vivi Setiawaty                                                                                                                                                                                                                                                                           |
| EPI_ISL_947296                                                                                                                                                                                                                                                                                                                                                                                                                                                                             | RSU Kartika Husada                          | Eijkman Institute for Molecular Biology, Ministry of Research and Technology/National Agency for Research and Innovation                                    |                                                                                                                                                                                                                                                                                                                                                                                                                                                                                                                                          | Amin Soebandrio; Edison Johar; Frilasita A Yudhaputri; Hidayat Trimarsanto; Iskandar Adnan; Khin Saw Myint; Lydia V. Panggalo; Safarina G Malik; Sukma Oktavianthi; Willy Agustine                                                                                                                                                                                                                                                                                          |
| EPI_ISL_2854740, EPI_ISL_2854741, EPI_ISL_2854742, EPI_ISL_2854743, EPI_ISL_2854744, EPI_ISL_3138786, EPI_ISL_3138796, EPI_ISL_3138797, EPI_ISL_3138798, EPI_ISL_3138799, EPI_ISL_3138800, EPI_ISL_3138801                                                                                                                                                                                                                                                                                 | see above                                   | RSU Kartika Pulomas                                                                                                                                         | National Institute of Health Research and Development                                                                                                                                                                                                                                                                                                                                                                                                                                                                                    | ; Arie Ardiansyah Nugraha; Fajar Nur Sulistiyohadi; Hana Apsari Pawestri; Hartanti Dian Ikawati; Kartika Dewi Puspa; Krisna Pangesti; Nelly Puspandari; Subangkit; Triyani Soekarso; Vivi Setiawaty                                                                                                                                                                                                                                                                         |

|                                                                                                                                                                                                                                                                                                                                                                                                                                                                                                                                                                                                                                                                                                                                                                                         |                                                  |                                                                                                                                                                                                                                                                                                                                                                                                                                                                                                                                                          |                                                                                                                                                                                                                                                                                                                                                                                                                                                     |
|-----------------------------------------------------------------------------------------------------------------------------------------------------------------------------------------------------------------------------------------------------------------------------------------------------------------------------------------------------------------------------------------------------------------------------------------------------------------------------------------------------------------------------------------------------------------------------------------------------------------------------------------------------------------------------------------------------------------------------------------------------------------------------------------|--------------------------------------------------|----------------------------------------------------------------------------------------------------------------------------------------------------------------------------------------------------------------------------------------------------------------------------------------------------------------------------------------------------------------------------------------------------------------------------------------------------------------------------------------------------------------------------------------------------------|-----------------------------------------------------------------------------------------------------------------------------------------------------------------------------------------------------------------------------------------------------------------------------------------------------------------------------------------------------------------------------------------------------------------------------------------------------|
| EPI_ISL_888994                                                                                                                                                                                                                                                                                                                                                                                                                                                                                                                                                                                                                                                                                                                                                                          | RSU MMC                                          | Eijkman Institute for Molecular Biology, Ministry of Research and Technology/National Agency for Research and Innovation                                                                                                                                                                                                                                                                                                                                                                                                                                 | Amin Soebandrio; Edison Johar; Frilasita A Yudhaputri; Hidayat Trimarsanto; Iskandar Adnan; Khin Saw Myint; Lydia V. Panggalo; Safarina G Malik; Sukma Oktavianthi; Willy Agustine                                                                                                                                                                                                                                                                  |
| EPI_ISL_889010, EPI_ISL_889014, EPI_ISL_889018, EPI_ISL_947281                                                                                                                                                                                                                                                                                                                                                                                                                                                                                                                                                                                                                                                                                                                          | RSU Medika Dramaga                               | Eijkman Institute for Molecular Biology, Ministry of Research and Technology/National Agency for Research and Innovation                                                                                                                                                                                                                                                                                                                                                                                                                                 | Amin Soebandrio; Edison Johar; Frilasita A Yudhaputri; Hidayat Trimarsanto; Iskandar Adnan; Khin Saw Myint; Lydia V. Panggalo; Safarina G Malik; Sukma Oktavianthi; Willy Agustine                                                                                                                                                                                                                                                                  |
| EPI_ISL_888993, EPI_ISL_947298, EPI_ISL_947317, EPI_ISL_947324, EPI_ISL_1284212                                                                                                                                                                                                                                                                                                                                                                                                                                                                                                                                                                                                                                                                                                         | RSU Medirossa                                    | Eijkman Institute for Molecular Biology, Ministry of Research and Technology/National Agency for Research and Innovation                                                                                                                                                                                                                                                                                                                                                                                                                                 | Amin Soebandrio; Edison Johar; Frilasita A Yudhaputri; Hidayat Trimarsanto; Iskandar Adnan; Khin Saw Myint; Lydia V. Panggalo; Safarina G Malik; Sukma Oktavianthi; Willy Agustine                                                                                                                                                                                                                                                                  |
| EPI_ISL_947255                                                                                                                                                                                                                                                                                                                                                                                                                                                                                                                                                                                                                                                                                                                                                                          | RSU Meilia                                       | Eijkman Institute for Molecular Biology, Ministry of Research and Technology/National Agency for Research and Innovation                                                                                                                                                                                                                                                                                                                                                                                                                                 | Amin Soebandrio; Edison Johar; Frilasita A Yudhaputri; Hidayat Trimarsanto; Iskandar Adnan; Khin Saw Myint; Lydia V. Panggalo; Safarina G Malik; Sukma Oktavianthi; Willy Agustine                                                                                                                                                                                                                                                                  |
| EPI_ISL_4090566, EPI_ISL_4090567, EPI_ISL_4090568, EPI_ISL_4090569, EPI_ISL_4090570                                                                                                                                                                                                                                                                                                                                                                                                                                                                                                                                                                                                                                                                                                     | RSU Melinda 2                                    | National Institute of Health Research and Development                                                                                                                                                                                                                                                                                                                                                                                                                                                                                                    | Arie Ardiansyah Nugraha; Fajar Nur Sulistiyohadi; Hana Apsari Pawestri; Hartanti Dian Ikawati; Kartika Dewi Puspa; Krisna Pangesti; Nelly Puspandari; Subangkit; Triyani Soekarso; Vivi Setiawaty                                                                                                                                                                                                                                                   |
| EPI_ISL_2987608                                                                                                                                                                                                                                                                                                                                                                                                                                                                                                                                                                                                                                                                                                                                                                         | RSU Mitra Keluarga Kalideres                     | National Institute of Health Research and Development                                                                                                                                                                                                                                                                                                                                                                                                                                                                                                    | Arie Ardiansyah Nugraha; Fajar Nur Sulistiyohadi; Hana Apsari Pawestri; Hartanti Dian Ikawati; Kartika Dewi Puspa; Krisna Pangesti; Nelly Puspandari; Subangkit; Triyani Soekarso; Vivi Setiawaty                                                                                                                                                                                                                                                   |
| EPI_ISL_4741904                                                                                                                                                                                                                                                                                                                                                                                                                                                                                                                                                                                                                                                                                                                                                                         | RSU PKU Muhammadiyah GUBUG                       | Balai Laboratorium Kesehatan Dan Pengujian Alat Kesehatan Provinsi Jawa Tengah                                                                                                                                                                                                                                                                                                                                                                                                                                                                           | Alia Wijayanti; Dwi Nursetyaasih; Dyah Ayu; Endah Wahyu Y; Ismi Farhati; Purnomo; Sekti Handayani; Wiwik Peni; Yekti Hediningsih                                                                                                                                                                                                                                                                                                                    |
| EPI_ISL_889011                                                                                                                                                                                                                                                                                                                                                                                                                                                                                                                                                                                                                                                                                                                                                                          | RSU Permata Cibubur                              | Eijkman Institute for Molecular Biology, Ministry of Research and Technology/National Agency for Research and Innovation                                                                                                                                                                                                                                                                                                                                                                                                                                 | Amin Soebandrio; Edison Johar; Frilasita A Yudhaputri; Hidayat Trimarsanto; Iskandar Adnan; Khin Saw Myint; Lydia V. Panggalo; Safarina G Malik; Sukma Oktavianthi; Willy Agustine                                                                                                                                                                                                                                                                  |
| EPI_ISL_2854777                                                                                                                                                                                                                                                                                                                                                                                                                                                                                                                                                                                                                                                                                                                                                                         | RSU Permata Depok                                | National Institute of Health Research and Development                                                                                                                                                                                                                                                                                                                                                                                                                                                                                                    | Arie Ardiansyah Nugraha; Hana Apsari Pawestri; Hartanti Dian Ikawati; Kartika Dewi Puspa; Krisna Pangesti; Nelly Puspandari; Subangkit; Triyani Soekarso; Vivi Setiawaty                                                                                                                                                                                                                                                                            |
| EPI_ISL_1622394, EPI_ISL_1622401, EPI_ISL_1622402                                                                                                                                                                                                                                                                                                                                                                                                                                                                                                                                                                                                                                                                                                                                       | RSU Proklamasi                                   | Eijkman Institute for Molecular Biology, Ministry of Research and Technology/National Agency for Research and Innovation                                                                                                                                                                                                                                                                                                                                                                                                                                 | Amin Soebandrio; Edison Johar; Frilasita A Yudhaputri; Hidayat Trimarsanto; Iskandar Adnan; Khin Saw Myint; Lydia V. Panggalo; Muhammad Rezki Rasyak; Safarina G Malik; Sukma Oktavianthi; Willy Agustine                                                                                                                                                                                                                                           |
| EPI_ISL_833392                                                                                                                                                                                                                                                                                                                                                                                                                                                                                                                                                                                                                                                                                                                                                                          | RSU Sayang Bunda, Makasar,Indonesia              | Biosafety Level-3 Laboratory, Indonesian Institute of Sciences (LIPI)                                                                                                                                                                                                                                                                                                                                                                                                                                                                                    | Ade Andriani; Ahmad Fathoni; Andri Wardiana; Anggia Prasetyoputri; Anik Budhi Dharmayanthi; Dini Nurdiani; Isa Nuryana; Ratih Asmana Ningrum; Syam Budi Iryanto; Wahyuni                                                                                                                                                                                                                                                                            |
| EPI_ISL_4741903                                                                                                                                                                                                                                                                                                                                                                                                                                                                                                                                                                                                                                                                                                                                                                         | RSU Siaga Medika Pemalang                        | Balai Laboratorium Kesehatan Dan Pengujian Alat Kesehatan Provinsi Jawa Tengah                                                                                                                                                                                                                                                                                                                                                                                                                                                                           | Alia Wijayanti; Dwi Nursetyaasih; Dyah Ayu; Endah Wahyu Y; Ismi Farhati; Purnomo; Sekti Handayani; Wiwik Peni; Yekti Hediningsih                                                                                                                                                                                                                                                                                                                    |
| EPI_ISL_3216555, EPI_ISL_3216556, EPI_ISL_3691574                                                                                                                                                                                                                                                                                                                                                                                                                                                                                                                                                                                                                                                                                                                                       | RSU Siloam, Bekasi                               | National Institute of Health Research and Development                                                                                                                                                                                                                                                                                                                                                                                                                                                                                                    | Arie Ardiansyah Nugraha; Fajar Nur Sulistiyohadi; Hana Apsari Pawestri; Hartanti Dian Ikawati; Kartika Dewi Puspa; Krisna Pangesti; Nelly Puspandari; Subangkit; Triyani Soekarso; Vivi Setiawaty                                                                                                                                                                                                                                                   |
| EPI_ISL_2854776                                                                                                                                                                                                                                                                                                                                                                                                                                                                                                                                                                                                                                                                                                                                                                         | RSU St Carolus                                   | National Institute of Health Research and Development                                                                                                                                                                                                                                                                                                                                                                                                                                                                                                    | Arie Ardiansyah Nugraha; Hana Apsari Pawestri; Hartanti Dian Ikawati; Kartika Dewi Puspa; Krisna Pangesti; Nelly Puspandari; Subangkit; Triyani Soekarso; Vivi Setiawaty                                                                                                                                                                                                                                                                            |
| EPI_ISL_888995, EPI_ISL_889002, EPI_ISL_1284004, EPI_ISL_1284090, EPI_ISL_1284093, EPI_ISL_1284096, EPI_ISL_1284174, EPI_ISL_1284344                                                                                                                                                                                                                                                                                                                                                                                                                                                                                                                                                                                                                                                    | see above                                        | Eijkman Institute for Molecular Biology, Ministry of Research and Technology/National Agency for Research and Innovation                                                                                                                                                                                                                                                                                                                                                                                                                                 | Amin Soebandrio; Edison Johar; Frilasita A Yudhaputri; Hidayat Trimarsanto; Iskandar Adnan; Khin Saw Myint; Lydia V. Panggalo; Safarina G Malik; Sukma Oktavianthi; Willy Agustine                                                                                                                                                                                                                                                                  |
| EPI_ISL_2932713                                                                                                                                                                                                                                                                                                                                                                                                                                                                                                                                                                                                                                                                                                                                                                         | RSU dr Abdul Radjak                              | National Institute of Health Research and Development                                                                                                                                                                                                                                                                                                                                                                                                                                                                                                    | Arie Ardiansyah Nugraha; Hana Apsari Pawestri; Hartanti Dian Ikawati; Kartika Dewi Puspa; Krisna Pangesti; Nelly Puspandari; Subangkit; Triyani Soekarso; Vivi Setiawaty                                                                                                                                                                                                                                                                            |
| EPI_ISL_4783428, EPI_ISL_4783469, EPI_ISL_4783478, EPI_ISL_4783499, EPI_ISL_4783523, EPI_ISL_4783608, EPI_ISL_4783611, EPI_ISL_4783654, EPI_ISL_4783668                                                                                                                                                                                                                                                                                                                                                                                                                                                                                                                                                                                                                                 | see above                                        | RSUD ARIFIN ACHMAD PROVINSI RIAU<br>Genomik Solidaritas Indonesia Laboratorium                                                                                                                                                                                                                                                                                                                                                                                                                                                                           | Annisa Muthiah Sukirman; Anuraj Shankar; Ariel Pradipta; Carissa Sintca Wijaya; Dewi Anggraini; Esti Rahayuning Tias; Fajri Marindra Siregar; Gracia Felias Enos Korompis; Himawan Masyhuri; Louisa Markus; Meutia Ayuputeri Kumaheri; Rahmat Azhari Kemal; Stefanus Bernard                                                                                                                                                                        |
| EPI_ISL_2233089                                                                                                                                                                                                                                                                                                                                                                                                                                                                                                                                                                                                                                                                                                                                                                         | RSUD Abdul Moeis                                 | National Institute of Health Research and Development                                                                                                                                                                                                                                                                                                                                                                                                                                                                                                    | Arie Ardiansyah Nugraha; Hana Apsari Pawestri; Hartanti Dian Ikawati; Kartika Dewi Puspa; Krisna Pangesti; Nelly Puspandari; Subangkit; Triyani Soekarso; Vivi Setiawaty                                                                                                                                                                                                                                                                            |
| EPI_ISL_5446154, EPI_ISL_5446155, EPI_ISL_5446157, EPI_ISL_5446160, EPI_ISL_5446162, EPI_ISL_5446164, EPI_ISL_5446166, EPI_ISL_5446168, EPI_ISL_5446169, EPI_ISL_5446170, EPI_ISL_5446171                                                                                                                                                                                                                                                                                                                                                                                                                                                                                                                                                                                               | see above                                        | RSUD Al Ihsan<br>Laboratorium Genetik Molekuler, Biomedik Lanjut, FK UNPAD                                                                                                                                                                                                                                                                                                                                                                                                                                                                               | Chrysanti Murad; Dewi Rinakanti; Dwi Agustian; Fensi Amalia; Jessi Annisa; Lidya Chaidir; Nurul Setia Rahayu; Rima Destya Triatini; Savira Ekawardhani; Tri Hanggono Ahmad; Yeni Rendieni; Yunia Sribudiani                                                                                                                                                                                                                                         |
| EPI_ISL_5796026, EPI_ISL_5796027, EPI_ISL_5796028, EPI_ISL_5796029, EPI_ISL_5796030, EPI_ISL_5796031, EPI_ISL_5796032, EPI_ISL_5796033, EPI_ISL_5796034, EPI_ISL_5796082, EPI_ISL_5796086, EPI_ISL_5796088                                                                                                                                                                                                                                                                                                                                                                                                                                                                                                                                                                              | see above                                        | RSUD Anugerah Tomohon<br>National Institute of Health Research and Development                                                                                                                                                                                                                                                                                                                                                                                                                                                                           | Arie Ardiansyah Nugraha; Fajar Nur; Fajar Nur Sulistiyohadi; Hana Apsari Pawestri; Hartanti Dian Ikawati; Kartika Dewi Puspa; Krisna Pangesti; Nelly Puspandari; Subangkit; Sulistiyohadi; Triyani Soekarso; Vivi Setiawaty                                                                                                                                                                                                                         |
| EPI_ISL_318937, EPI_ISL_318938, EPI_ISL_318939, EPI_ISL_318941, EPI_ISL_3216532, EPI_ISL_3216533, EPI_ISL_3216534, EPI_ISL_3216535, EPI_ISL_3216536, EPI_ISL_3216537, EPI_ISL_3216538, EPI_ISL_3216539, EPI_ISL_3216540, EPI_ISL_3541192, EPI_ISL_3541193, EPI_ISL_3541194, EPI_ISL_3541195, EPI_ISL_3541196, EPI_ISL_3541197, EPI_ISL_3541198, EPI_ISL_3541199, EPI_ISL_3541200, EPI_ISL_3541201, EPI_ISL_3541202, EPI_ISL_3541203, EPI_ISL_3541204, EPI_ISL_3541205, EPI_ISL_3541206, EPI_ISL_3541207, EPI_ISL_3541208, EPI_ISL_3541209, EPI_ISL_3541210, EPI_ISL_3541211, EPI_ISL_3541212, EPI_ISL_3541213, EPI_ISL_3541214, EPI_ISL_3541215, EPI_ISL_3541216, EPI_ISL_3541218, EPI_ISL_3541219, EPI_ISL_3541220, EPI_ISL_3541221, EPI_ISL_3541221, EPI_ISL_3691585, EPI_ISL_3691586 | see above                                        | RSUD Arifin Achmad<br>National Institute of Health Research and Development                                                                                                                                                                                                                                                                                                                                                                                                                                                                              | Arie Ardiansyah Nugraha; Fajar Nur Sulistiyohadi; Fajri Marindra; Hana Apsari Pawestri; Hartanti Dian Ikawati; Kartika Dewi Puspa; Krisna Pangesti; Nelly Puspandari; Subangkit; Triyani Soekarso; Vivi Setiawaty                                                                                                                                                                                                                                   |
| EPI_ISL_2233106, EPI_ISL_2233107, EPI_ISL_2233108, EPI_ISL_2233109, EPI_ISL_2258213, EPI_ISL_2258218                                                                                                                                                                                                                                                                                                                                                                                                                                                                                                                                                                                                                                                                                    | see above                                        | RSUD Arifin Ahmad Riau<br>National Institute of Health Research and Development                                                                                                                                                                                                                                                                                                                                                                                                                                                                          | Arie Ardiansyah Nugraha; Fajri Marinda; Hana Apsari Pawestri; Hartanti Dian Ikawati; Kartika Dewi Puspa; Krisna Pangesti; Nelly Puspandari; Subangkit; Triyani Soekarso; Vivi Setiawaty                                                                                                                                                                                                                                                             |
| EPI_ISL_1824616, EPI_ISL_1824617, EPI_ISL_1824618                                                                                                                                                                                                                                                                                                                                                                                                                                                                                                                                                                                                                                                                                                                                       | RSUD Bahteramas Kendari                          | National Institute of Health Research and Development                                                                                                                                                                                                                                                                                                                                                                                                                                                                                                    | Arie Ardiansyah Nugraha; Hana Apsari Pawestri; Hartanti Dian Ikawati; Kartika Dewi Puspa; Krisna Pangesti; Nelly Puspandari; Subangkit; Vivi Setiawaty                                                                                                                                                                                                                                                                                              |
| EPI_ISL_2047532, EPI_ISL_2106979, EPI_ISL_2617543, EPI_ISL_2617544, EPI_ISL_2617545, EPI_ISL_2617546, EPI_ISL_2617547, EPI_ISL_2617548, EPI_ISL_2617549, EPI_ISL_2854763, EPI_ISL_2854764, EPI_ISL_2854765, EPI_ISL_2854766, EPI_ISL_2854767, EPI_ISL_2854768, EPI_ISL_2854769, EPI_ISL_2896200                                                                                                                                                                                                                                                                                                                                                                                                                                                                                         | see above                                        | RSUD Bali Mandara<br>National Institute of Health Research and Development                                                                                                                                                                                                                                                                                                                                                                                                                                                                               | Arie Ardiansyah Nugraha; Hana Apsari Pawestri; Hartanti Dian Ikawati; I Wayan Agus Gede Manik Saputra; Kartika Dewi Puspa; Krisna Pangesti; Nelly Puspandari; Subangkit; Triyani Soekarso; Vivi Setiawaty                                                                                                                                                                                                                                           |
| EPI_ISL_538503                                                                                                                                                                                                                                                                                                                                                                                                                                                                                                                                                                                                                                                                                                                                                                          | RSUD Bali Mandara Denpasar Bali                  | National Institute of Health Research and Development                                                                                                                                                                                                                                                                                                                                                                                                                                                                                                    | AA; HA; HD; Ikawati; KD; KNA; Nugraha; Paisal; Pangesti; Pawestri; Puspa; Setiawaty, V.; Soekarso; Subangkit; T                                                                                                                                                                                                                                                                                                                                     |
| EPI_ISL_458081, EPI_ISL_529964                                                                                                                                                                                                                                                                                                                                                                                                                                                                                                                                                                                                                                                                                                                                                          | RSUD Bangil Pasuruan                             | Institute of Tropical Disease, Universitas Airlangga                                                                                                                                                                                                                                                                                                                                                                                                                                                                                                     | Aldise M Nastri; Arma Roosalina; Gatot Soegiarto; Jezza R Dewantari; Kazufumi Shimizu; Krisnoadi Rahardjo; Laksmi Wulandari; Maria I Lusida; Mitsuhiro Nishimura; Resti Yudhawati; Retno A Setyoningrum; Rima R Prasetya; Soetjipto; Yasuko Mori; Yokko K Shimizu                                                                                                                                                                                   |
| EPI_ISL_2600952, EPI_ISL_2600982, EPI_ISL_2601030, EPI_ISL_2601031, EPI_ISL_2601032, EPI_ISL_2601033                                                                                                                                                                                                                                                                                                                                                                                                                                                                                                                                                                                                                                                                                    | RSUD Banyumas                                    | Genetics Working Group (Pokja Genetik) Faculty of Medicine, Public Health and Nursing Universitas Gadjah Mada (FK-KMK UGM); Disease Investigation Center Wates Ministry of Agriculture Indonesia; Department of Microbiology FK-KMK UGM; Laboratorium Diagnostik Yayasan Tahija World Mosquito Program (WMP) Yogyakarta Center for Tropical Medicine FK-KMK UGM; Integrated Research Center FK-KMK UGM; Department of Computer Science and Electronics FMIPA UGM; RSUP Dr. Sardjito                                                                      | Afiahayati; Alvina A Setiawan; Cita S Amalia; Dwi AA Nugrahaningsih; Dwi Indaryati; Dyah A Puspitarani; Edwin W. Daniwijaya; Eggi Arguni; Endah Supriyati; Gunadi; Hana F Hanifin; Hendra Wibawa; Indarto Sulistiyono; Irene Tania; Kanza a Vujiri; Kristy Iskandar; Ludhang P. Rizki; Marcellus; Mohamad S. Hakim; Nungki Anggorowati; Pramesti G Dewi; Siswanto; Susan Simanjaya; Titik Nuryastuti; Tri Wibawa                                    |
| EPI_ISL_791980                                                                                                                                                                                                                                                                                                                                                                                                                                                                                                                                                                                                                                                                                                                                                                          | RSUD Blambangan Banyuwangi                       | National Institute of Health Research and Development                                                                                                                                                                                                                                                                                                                                                                                                                                                                                                    | AA; HA; HD; Ikawati; KD; KNA; N; Noor; Nugraha; Pangesti; Pawestri; Puspa; Puspandari; RI; Setiawaty; Soekarso; Subangkit; T; V                                                                                                                                                                                                                                                                                                                     |
| EPI_ISL_2262294, EPI_ISL_3216562, EPI_ISL_3216563, EPI_ISL_3216564, EPI_ISL_3216565, EPI_ISL_3216566, EPI_ISL_3216567, EPI_ISL_3216568, EPI_ISL_3216569, EPI_ISL_3216570, EPI_ISL_3691576                                                                                                                                                                                                                                                                                                                                                                                                                                                                                                                                                                                               | see above                                        | RSUD Brebes<br>National Institute of Health Research and Development                                                                                                                                                                                                                                                                                                                                                                                                                                                                                     | Arie Ardiansyah Nugraha; Fajar Nur Sulistiyohadi; Hana Apsari Pawestri; Hartanti Dian Ikawati; Kartika Dewi Puspa; Krisna Pangesti; Nelly Puspandari; Subangkit; Triyani Soekarso; Vivi Setiawaty                                                                                                                                                                                                                                                   |
| EPI_ISL_576383                                                                                                                                                                                                                                                                                                                                                                                                                                                                                                                                                                                                                                                                                                                                                                          | RSUD Budi Rahayu Kota Magelang                   | Genetics Working Group (Pokja Genetik) Faculty of Medicine, Public Health and Nursing Universitas Gadjah Mada (FK-KMK UGM); Disease Investigation Center Wates Ministry of Agriculture Indonesia; Department of Microbiology FK-KMK UGM; Laboratorium Diagnostik Yayasan Tahija World Mosquito Program (WMP) Yogyakarta Center for Tropical Medicine FK-KMK UGM; Integrated Research Center FK-KMK UGM; Department of Computer Science and Electronics FMIPA UGM; Balai Besar Teknik Kesehatan Lingkungan dan Pengendalian Penyakit (BBTKLPP) Yogyakarta | Aditya Rifqi Fauzi; Afiahayati; Ari Meliyanti; Audric Kenny Tedja; Dwi AA Nugrahaningsih; Edwin W. Daniwijaya; Eggi Arguni; Endah Supriyati; Gunadi; Havid Setyawan; Hendra Wibawa; Indaryati; Irene; Kristy Iskandar; Ludhang P. Rizki; Marcellus; Merliana Sari Situmeang; Mohamad S. Hakim; Nungki Anggorowati; Siswanto; Titik Nuryastuti; Tri Wibawa                                                                                           |
| EPI_ISL_759703                                                                                                                                                                                                                                                                                                                                                                                                                                                                                                                                                                                                                                                                                                                                                                          | RSUD Bung Karno                                  | Universitas Sebelas Maret (UNS), Rumah sakit Universitas Sebelas Maret (RS-UNS) Surakarta, National Institute of Health Research and Development, Indonesian Ministry of Health                                                                                                                                                                                                                                                                                                                                                                          | Aff Avicena Gufron; Arie Ardiansyah Nugraha; Betty Suryawati; Dewi Puspa; Hana Apsari Pawestri; Hartanti Dian Ika; Kartika; Vivi Setiawaty; Yulia sari; hartono; maryani                                                                                                                                                                                                                                                                            |
| EPI_ISL_759705                                                                                                                                                                                                                                                                                                                                                                                                                                                                                                                                                                                                                                                                                                                                                                          | RSUD Bung Karno, Surakarta                       | Universitas Sebelas Maret (UNS); Rumah Sakit Universitas Sebelas Maret (RS-UNS), Surakarta; National Institute of Health Research and Development, Indonesian Ministry of Health , Jakarta).                                                                                                                                                                                                                                                                                                                                                             | Aff Avicena Gufron; Arie Ardiansyah Nugraha; Betty Suryawati; Dewi Puspa; Hana Apsari Pawestri; Hartanti Dian Ika; Hartono; Kartika; Maryani; Vivi Setiawaty.; Yulia Sari                                                                                                                                                                                                                                                                           |
| EPI_ISL_3216520                                                                                                                                                                                                                                                                                                                                                                                                                                                                                                                                                                                                                                                                                                                                                                         | RSUD CEMPAKA PUTIH / DINAS KESEHATAN DKI JAKARTA | Genomik Solidaritas Indonesia Laboratorium                                                                                                                                                                                                                                                                                                                                                                                                                                                                                                               | Alfin Mohammad Abdilllah; Anna Christina Brazia; Annisa Muthiah Sukirman; Anuraj Shankar; Ariel Pradipta; Carissa Sintca Wijaya; Dhahlia Agustina Cahyono; Gracia Felias Enos Korompis; Himawan Masyhuri; Meutia Ayuputeri Kumaheri; Neng Hilma Hamidah; Normastuti Adhini Tantyo; Reinhart Gabriel; Vania Gavrilva Wikasa                                                                                                                          |
| EPI_ISL_2335090, EPI_ISL_2335146, EPI_ISL_2335456, EPI_ISL_2335872, EPI_ISL_2336149                                                                                                                                                                                                                                                                                                                                                                                                                                                                                                                                                                                                                                                                                                     | RSUD CILACAP                                     | Genetics Working Group (Pokja Genetik) Faculty of Medicine, Public Health and Nursing Universitas Gadjah Mada (FK-KMK UGM); Disease Investigation Center Wates Ministry of Agriculture Indonesia; Department of Microbiology FK-KMK UGM; Laboratorium Diagnostik Yayasan Tahija World Mosquito Program (WMP) Yogyakarta Center for Tropical Medicine FK-KMK UGM; Integrated Research Center FK-KMK UGM; Department of Computer Science and Electronics FMIPA UGM; RSUP Dr. Sardjito                                                                      | Afiahayati; Alvina A Setiawan; Cita S Amalia; Dwi AA Nugrahaningsih; Dwi Indaryati; Dyah A Puspitarani; Edwin W. Daniwijaya; Eggi Arguni; Endah Supriyati; Gunadi; Hana F Hanifin; Hendra Wibawa; I Putu Aditio A; Indarto Sulistiyono; Irene Tania; Kristy Iskandar; Ludhang P. Rizki; Marcellus; Maria P Inggriani; Mohamad S. Hakim; Nungki Anggorowati; Pramesti G Dewi; Siswanto; Susan Simanjaya; Titik Nuryastuti; Tri Wibawa; Untung Riawan |
| EPI_ISL_2854745, EPI_ISL_2854746,                                                                                                                                                                                                                                                                                                                                                                                                                                                                                                                                                                                                                                                                                                                                                       | RSUD Ciawi                                       | National Institute of Health Research and Development                                                                                                                                                                                                                                                                                                                                                                                                                                                                                                    | ; Arie Ardiansyah Nugraha; Hana Apsari Pawestri; Hartanti Dian Ikawati; Kartika Dewi Puspa; Krisna Pangesti; Nelly Puspandari; Subangkit; Triyani Soekarso; Vivi Setiawaty                                                                                                                                                                                                                                                                          |

|                                                                                                                                                                                                                                                                                                                                                                                      |                                                   |                                                                                                                                                                                                                                                                                                                                                                                                                                                                                                                                                          |                                                                                                                                                                                                                                                                                                                                                                                                                                                                                                                                                                                                                                                                                                |                                                                                                                                                                                                                                                                                                                                                                                                                                                                                                                               |
|--------------------------------------------------------------------------------------------------------------------------------------------------------------------------------------------------------------------------------------------------------------------------------------------------------------------------------------------------------------------------------------|---------------------------------------------------|----------------------------------------------------------------------------------------------------------------------------------------------------------------------------------------------------------------------------------------------------------------------------------------------------------------------------------------------------------------------------------------------------------------------------------------------------------------------------------------------------------------------------------------------------------|------------------------------------------------------------------------------------------------------------------------------------------------------------------------------------------------------------------------------------------------------------------------------------------------------------------------------------------------------------------------------------------------------------------------------------------------------------------------------------------------------------------------------------------------------------------------------------------------------------------------------------------------------------------------------------------------|-------------------------------------------------------------------------------------------------------------------------------------------------------------------------------------------------------------------------------------------------------------------------------------------------------------------------------------------------------------------------------------------------------------------------------------------------------------------------------------------------------------------------------|
| EPI_ISL_2854747                                                                                                                                                                                                                                                                                                                                                                      |                                                   |                                                                                                                                                                                                                                                                                                                                                                                                                                                                                                                                                          |                                                                                                                                                                                                                                                                                                                                                                                                                                                                                                                                                                                                                                                                                                |                                                                                                                                                                                                                                                                                                                                                                                                                                                                                                                               |
| EPI_ISL_2333654, EPI_ISL_2333810, EPI_ISL_2334058, EPI_ISL_2334094, EPI_ISL_2334474, EPI_ISL_2334587, EPI_ISL_2335021, EPI_ISL_2600582, EPI_ISL_2600951, EPI_ISL_2601033                                                                                                                                                                                                             | see above                                         | RSUD Cilacap                                                                                                                                                                                                                                                                                                                                                                                                                                                                                                                                             | Genetics Working Group (Pokja Genetik) Faculty of Medicine, Public Health and Nursing Universitas Gadjah Mada (FK-KMK UGM); Disease Investigation Center Wates Ministry of Agriculture Indonesia; Department of Microbiology FK-KMK UGM; Laboratorium Diagnostik Yayasan Tahaia World Mosquito Program (WMP) Yogyakarta Center for Tropical Medicine FK-KMK UGM; Integrated Research Center FK-KMK UGM; Department of Computer Science and Electronics FMIPA UGM; RSUP Dr. Sardjito                                                                                                                                                                                                            | Afiahayati; Alvina A Setiawan; Cita S Amalia; Dwi AA Nugrahaningsih; Dwi Indaryati; Dyah A Puspitarani; Edwin W. Daniwijaya; Eggi Arguni; Endah Supriyati; Gunadi; Hana F Hanifin; Hendra Wibawa; I Putu Aditio A; Indarto Sulistiyono; Irene Tania; Kristy Iskandar; Ludhang P. Rizki; Marcellus; Maria P Inggriani; Mohamad S. Hakim; Nungki Anggorowati; Pramesti G Dewi; Siswanto; Susan Simanjaya; Titik Nuryastuti; Tri Wibawa; Untung Riawan                                                                           |
| EPI_ISL_888998, EPI_ISL_889000, EPI_ISL_889007, EPI_ISL_1283938, EPI_ISL_1283988, EPI_ISL_1284014, EPI_ISL_1284061, EPI_ISL_1622366, EPI_ISL_1622395, EPI_ISL_1622396, EPI_ISL_1622405, EPI_ISL_1622406, EPI_ISL_1622407                                                                                                                                                             | see above                                         | RSUD Cileungsi                                                                                                                                                                                                                                                                                                                                                                                                                                                                                                                                           | Eijkman Institute for Molecular Biology, Ministry of Research and Technology/National Agency for Research and Innovation                                                                                                                                                                                                                                                                                                                                                                                                                                                                                                                                                                       | Amin Soebandrio; Edison Johar; Frilasita A Yudhaputri; Hidayat Trimarsanto; Iskandar Adnan; Khin Saw Myint; Lydia V. Panggalo; Muhammad Rezki Rasyak; Safarina G Malik; Sukma Oktavianthi; Willy Agustine                                                                                                                                                                                                                                                                                                                     |
| EPI_ISL_2013046, EPI_ISL_2364580, EPI_ISL_2364585, EPI_ISL_2364594, EPI_ISL_2364611, EPI_ISL_2364612, EPI_ISL_2364613, EPI_ISL_2364644                                                                                                                                                                                                                                               | see above                                         | RSUD Cileungsi                                                                                                                                                                                                                                                                                                                                                                                                                                                                                                                                           | Eijkman Institute for Molecular Biology, National Agency for Research and Innovation                                                                                                                                                                                                                                                                                                                                                                                                                                                                                                                                                                                                           | Amin Soebandrio; Edison Johar; Frilasita A Yudhaputri; Hidayat Trimarsanto; Iskandar Adnan; Khin Saw Myint; Lidwina Priliani; Lydia V. Panggalo; Muhammad Rezki Rasyak; Safarina G Malik; Sukma Oktavianthi; Willy Agustine                                                                                                                                                                                                                                                                                                   |
| EPI_ISL_2709400                                                                                                                                                                                                                                                                                                                                                                      | EPI_ISL_791979                                    | RSUD Cileungsi                                                                                                                                                                                                                                                                                                                                                                                                                                                                                                                                           | Eijkman Institute for Molecular Biology, National Research and Innovation Agency                                                                                                                                                                                                                                                                                                                                                                                                                                                                                                                                                                                                               | Amin Soebandrio; Edison Johar; Frilasita A Yudhaputri; Hidayat Trimarsanto; Iskandar Adnan; Khin Saw Myint; Lidwina Priliani; Lydia V. Panggalo; Muhammad Rezki Rasyak; Safarina G Malik; Sukma Oktavianthi; Willy Agustine                                                                                                                                                                                                                                                                                                   |
| EPI_ISL_2854690, EPI_ISL_2854691, EPI_ISL_2854692                                                                                                                                                                                                                                                                                                                                    | RSUD Curup Bengkulu                               | RSUD DR Moewardi Surakarta                                                                                                                                                                                                                                                                                                                                                                                                                                                                                                                               | National Institute of Health Research and Development                                                                                                                                                                                                                                                                                                                                                                                                                                                                                                                                                                                                                                          | AA; HA; HD; Ikawati; KD; KNA; Mardiani; N; Nugraha; Pangesti; Pawestri; Pupa; Puspandari; Setiawaty; Soekarso; Subangkit; T; V                                                                                                                                                                                                                                                                                                                                                                                                |
| EPI_ISL_2964684, EPI_ISL_2964688, EPI_ISL_2964692, EPI_ISL_2964941, EPI_ISL_2964942, EPI_ISL_2964943, EPI_ISL_2964944, EPI_ISL_2964956, EPI_ISL_2964957                                                                                                                                                                                                                              | EPI_ISL_956310                                    | RSUD DR. MOEWARDI Surakarta                                                                                                                                                                                                                                                                                                                                                                                                                                                                                                                              | National Institute of Health Research and Development                                                                                                                                                                                                                                                                                                                                                                                                                                                                                                                                                                                                                                          | Arie Ardiansyah Nugraha; Hana Apsari Pawestri; Hartanti Dian Ikawati; Kartika Dewi Pupa; Krisna Pangesti; Nelly Puspandari; Subangkit; Triyani Soekarso; Vivi Setiawaty                                                                                                                                                                                                                                                                                                                                                       |
| EPI_ISL_2964677                                                                                                                                                                                                                                                                                                                                                                      | RSUD DR. MOEWARDI Surakarta                       | Genetics Working Group (Pokja Genetik) Faculty of Medicine, Public Health and Nursing Universitas Gadjah Mada (FK-KMK UGM); Disease Investigation Center Wates Ministry of Agriculture Indonesia; Department of Microbiology FK-KMK UGM; Laboratorium Diagnostik Yayasan Tahaia World Mosquito Program (WMP) Yogyakarta Center for Tropical Medicine FK-KMK UGM; Integrated Research Center FK-KMK UGM; Department of Computer Science and Electronics FMIPA UGM; RSUP Dr. Sardjito                                                                      | Afiahayati; Alvina A Setiawan; Cita S Amalia; Dwi AA Nugrahaningsih; Dwi Indaryati; Dyah A Puspitarani; Edwin W. Daniwijaya; Eggi Arguni; Endah Supriyati; Gunadi; Hana F Hanifin; Hendra Wibawa; I Putu Aditio A; Indarto Sulistiyono; Irene Tania; Kristy Iskandar; Ludhang P. Rizki; Marcellus; Mohamad S. Hakim; Nungki Anggorowati; Pramesti G Dewi; Siswanto; Susan Simanjaya; Titik Nuryastuti; Tri Wibawa                                                                                                                                                                                                                                                                              |                                                                                                                                                                                                                                                                                                                                                                                                                                                                                                                               |
| EPI_ISL_2854737, EPI_ISL_2854738, EPI_ISL_2854739                                                                                                                                                                                                                                                                                                                                    | RSUD Dr Doris Sylvanus Kalteng                    | National Institute of Health Research and Development                                                                                                                                                                                                                                                                                                                                                                                                                                                                                                    |                                                                                                                                                                                                                                                                                                                                                                                                                                                                                                                                                                                                                                                                                                | ; Arie Ardiansyah Nugraha; Hana Apsari Pawestri; Hartanti Dian Ikawati; Kartika Dewi Pupa; Krisna Pangesti; Nelly Puspandari; Subangkit; Triyani Soekarso; Vivi Setiawaty                                                                                                                                                                                                                                                                                                                                                     |
| EPI_ISL_833040                                                                                                                                                                                                                                                                                                                                                                       | RSUD Dr. Abdul Aziz Singkawang                    | National Institute of Health Research and Development                                                                                                                                                                                                                                                                                                                                                                                                                                                                                                    |                                                                                                                                                                                                                                                                                                                                                                                                                                                                                                                                                                                                                                                                                                | AA; HA; HD; HN; Ikawati; Junus; KD; KNA; N; Nugraha; Pangesti; Pawestri; Pupa; Puspandari; Setiawaty; Soekarso; Subangkit; T; V                                                                                                                                                                                                                                                                                                                                                                                               |
| EPI_ISL_759967                                                                                                                                                                                                                                                                                                                                                                       | RSUD Dr. Iskak Tulungagung                        | Institute of Tropical Disease, Universitas Airlangga                                                                                                                                                                                                                                                                                                                                                                                                                                                                                                     | Aldise M Nastri; Gatot Soegiarto; Jezzy R Dewantari; Kazufumi Shimizu; Krisnoadi Rahardjo; Laksmi Wulandari; Maria I Lusida; Resti Yudhawati; Rima R Prasetya; Soetjipto; Supriyanto Dharmoredjo; Yasuko Mori                                                                                                                                                                                                                                                                                                                                                                                                                                                                                  |                                                                                                                                                                                                                                                                                                                                                                                                                                                                                                                               |
| EPI_ISL_4741899, EPI_ISL_4756064                                                                                                                                                                                                                                                                                                                                                     | RSUD Dr. M. Ashari Kabupaten Pemalang             | Balai Laboratorium Kesehatan Dan Pengujian Alat Kesehatan Provinsi Jawa Tengah                                                                                                                                                                                                                                                                                                                                                                                                                                                                           | Alia Wijayanti; Dwi Nursetyaasih; Dyah Ayu; Endah Wahyu Y; Ismi Farhati; Purnomo; Sekti Handayani; Wilwik Peni; Yetki Hediningsih                                                                                                                                                                                                                                                                                                                                                                                                                                                                                                                                                              |                                                                                                                                                                                                                                                                                                                                                                                                                                                                                                                               |
| EPI_ISL_956308, EPI_ISL_956310                                                                                                                                                                                                                                                                                                                                                       | RSUD Dr. M. Soewardhie                            | Institute of Tropical Disease, Universitas Airlangga                                                                                                                                                                                                                                                                                                                                                                                                                                                                                                     | Aldise M Nastri; Febria Rachmanita; Gatot Soegiarto; Jezzy R Dewantari; Kazufumi Shimizu; Krisnoadi Rahardjo; Laksmi Wulandari; Maria I Lusida; Resti Yudhawati; Rima R Prasetya; Soetjipto; Yasuko Mori                                                                                                                                                                                                                                                                                                                                                                                                                                                                                       |                                                                                                                                                                                                                                                                                                                                                                                                                                                                                                                               |
| EPI_ISL_4254872, EPI_ISL_4254873, EPI_ISL_4254874, EPI_ISL_4254875, EPI_ISL_4254876, EPI_ISL_4254877, EPI_ISL_4254878, EPI_ISL_4254879, EPI_ISL_4254880                                                                                                                                                                                                                              | see above                                         | RSUD Dr. Saiful Anwar Jawa Timur                                                                                                                                                                                                                                                                                                                                                                                                                                                                                                                         | National Institute of Health Research and Development                                                                                                                                                                                                                                                                                                                                                                                                                                                                                                                                                                                                                                          | Arie Ardiansyah Nugraha; Fajar Nur Sulistiyohadi; Hana Apsari Pawestri; Hartanti Dian Ikawati; Kartika Dewi Pupa; Krisna Pangesti; Nelly Puspandari; Subangkit; Triyani Soekarso; Vivi Setiawaty                                                                                                                                                                                                                                                                                                                              |
| EPI_ISL_4004659, EPI_ISL_4004660, EPI_ISL_4004661, EPI_ISL_4004662, EPI_ISL_4004663, EPI_ISL_4004664, EPI_ISL_4004665, EPI_ISL_4004666, EPI_ISL_4004667, EPI_ISL_4004668, EPI_ISL_4004669, EPI_ISL_4004670, EPI_ISL_4004671, EPI_ISL_4106117, EPI_ISL_4106118                                                                                                                        | see above                                         | RSUD Dr. Slamet Garut                                                                                                                                                                                                                                                                                                                                                                                                                                                                                                                                    | National Research and Innovation Agency (BRIN-Indonesia, VenomCoV Project Team); West Java Health Laboratory                                                                                                                                                                                                                                                                                                                                                                                                                                                                                                                                                                                   | Anik B. Dharmayanthi; Azzania Fibrani; Cut Nur Cinthia Alamanda; Ema Rahmawati; Indriawati; Karimatu Khoirunnisa; Listiana Oktavia; Masrukhin; Miftahul Farid; Rath A. Ningrum; Rifky Waluyajati Rachman; Rini Robiani; Ryan Bayusantika Ristandi; Sugiyono Saputra; Syaful Rizal; Syam B. Iryanto                                                                                                                                                                                                                            |
| EPI_ISL_1005695                                                                                                                                                                                                                                                                                                                                                                      | RSUD Dr. Soedirman                                | Genetics Working Group (Pokja Genetik) Faculty of Medicine, Public Health and Nursing Universitas Gadjah Mada (FK-KMK UGM); Disease Investigation Center Wates Ministry of Agriculture Indonesia; Department of Microbiology FK-KMK UGM; Laboratorium Diagnostik Yayasan Tahaia World Mosquito Program (WMP) Yogyakarta Center for Tropical Medicine FK-KMK UGM; Integrated Research Center FK-KMK UGM; Department of Computer Science and Electronics FMIPA UGM; Balai Besar Teknik Kesehatan Lingkungan dan Pengendalian Penyakit (BBTKLPP) Yogyakarta | Afiahayati; Arry Setyowati; Audric Kenny Tedja; Chusni Mubarakh; Dwi AA Nugrahaningsih; Edwin W. Daniwijaya; Eggi Arguni; Endah Supriyati; Gunadi; Havid Setyawan; Hendra Wibawa; Indaryati; Irene; Kristy Iskandar; Ludhang P. Rizki; Marcellus; Maria Patricia Inggriani; Mohamad S. Hakim; Nungki Anggorowati; Siswanto; Titik Nuryastuti; Tri Wibawa; Try Nirmala Sari                                                                                                                                                                                                                                                                                                                     |                                                                                                                                                                                                                                                                                                                                                                                                                                                                                                                               |
| EPI_ISL_437188, EPI_ISL_529965, EPI_ISL_560991, EPI_ISL_759962, EPI_ISL_759965, EPI_ISL_1226647, EPI_ISL_12274437, EPI_ISL_12284869, EPI_ISL_12284870, EPI_ISL_12284871, EPI_ISL_12284872, EPI_ISL_12284884                                                                                                                                                                          | see above                                         | RSUD Dr. Soetomo                                                                                                                                                                                                                                                                                                                                                                                                                                                                                                                                         | Institute of Tropical Disease, Universitas Airlangga                                                                                                                                                                                                                                                                                                                                                                                                                                                                                                                                                                                                                                           | Acub Zaenal; Aldise M Nastri; Gatot Soegiarto; Jezzy R Dewantari; Joni Wahyuhadi; Kazufumi Shimizu; Krisnoadi Rahardjo; Laksmi Wulandari; Maria I Lusida; Mitsuhoro Nishimura; Neneng D Kurniati; Resti Y Meliana; Resti Yudhawati; Retno A Setyoningrum; Rima R Prasetya; Soetjipto; Yasuko Mori; Yokho K Shimizu                                                                                                                                                                                                            |
| EPI_ISL_610161, EPI_ISL_610162, EPI_ISL_985396, EPI_ISL_985397, EPI_ISL_1005696, EPI_ISL_1005697, EPI_ISL_1005698                                                                                                                                                                                                                                                                    | see above                                         | RSUD Dr. Tjitrowardjo                                                                                                                                                                                                                                                                                                                                                                                                                                                                                                                                    | Genetics Working Group (Pokja Genetik) Faculty of Medicine, Public Health and Nursing Universitas Gadjah Mada (FK-KMK UGM); Disease Investigation Center Wates Ministry of Agriculture Indonesia; Department of Microbiology FK-KMK UGM; Laboratorium Diagnostik Yayasan Tahaia World Mosquito Program (WMP) Yogyakarta Center for Tropical Medicine FK-KMK UGM; Integrated Research Center FK-KMK UGM; Department of Computer Science and Electronics FMIPA UGM; Balai Besar Teknik Kesehatan Lingkungan dan Pengendalian Penyakit (BBTKLPP) Yogyakarta                                                                                                                                       | Aditya Rifqi Fauzi; Afiahayati; Alvin Santoso Kalim; Arry Setyowati; Chusni Mubarakh; Desyifa Mursalin; Dwi AA Nugrahaningsih; Dwiki afandiy; Dyah Ayu Puspitarani; Edwin W. Daniwijaya; Eggi Arguni; Endah Supriyati; Fadil Fahri; Gunadi; Havid Setyawan; Hendra Wibawa; Indaryati; Irene; Kemal Athollah; Kristy Iskandar; Ludhang P. Rizki; Marcellus; Mohamad S. Hakim; Nungki Anggorowati; Siswanto; Susan Simanjaya; Titik Nuryastuti; Tri Wibawa; Try Nirmala Sari; Untung Riawan; William Widitjiarso; Wuryanto      |
| EPI_ISL_2854750, EPI_ISL_2854751, EPI_ISL_2854752, EPI_ISL_2932710, EPI_ISL_2987658, EPI_ISL_2987659, EPI_ISL_2987660, EPI_ISL_2987661, EPI_ISL_3019945, EPI_ISL_3151601, EPI_ISL_3151605, EPI_ISL_3151606, EPI_ISL_3151612, EPI_ISL_3151613, EPI_ISL_3151619, EPI_ISL_3151620, EPI_ISL_3151626, EPI_ISL_3151627, EPI_ISL_3151631, EPI_ISL_3151632, EPI_ISL_3151633, EPI_ISL_3151639 | see above                                         | RSUD Dr. W.Z. Johannes kupang                                                                                                                                                                                                                                                                                                                                                                                                                                                                                                                            | National Institute of Health Research and Development                                                                                                                                                                                                                                                                                                                                                                                                                                                                                                                                                                                                                                          | Arie Ardiansyah Nugraha; Fajar Nur Sulistiyohadi; Hana Apsari Pawestri; Hartanti Dian Ikawati; Kartika Dewi Pupa; Krisna Pangesti; Nelly Puspandari; Subangkit; Triyani Soekarso; Vivi Setiawaty                                                                                                                                                                                                                                                                                                                              |
| EPI_ISL_4056015                                                                                                                                                                                                                                                                                                                                                                      | RSUD Dr. Wahidin Sudirohusodo                     | Institute of Tropical Disease, Universitas Airlangga                                                                                                                                                                                                                                                                                                                                                                                                                                                                                                     |                                                                                                                                                                                                                                                                                                                                                                                                                                                                                                                                                                                                                                                                                                | Aldise M Nastri; Gatot Soegiarto; Jezzy R Dewantari; Kazufumi Shimizu; Kohar Hari Santoso; Krisnoadi Rahardjo; Laksmi Wulandari; Maria I Lusida; Resti Yudhawati; Rima R Prasetya; Soetjipto; Yasuko Mori                                                                                                                                                                                                                                                                                                                     |
| EPI_ISL_3230176, EPI_ISL_3230177, EPI_ISL_3374702, EPI_ISL_3374703, EPI_ISL_3548633, EPI_ISL_3548688, EPI_ISL_3836263, EPI_ISL_3836264, EPI_ISL_3946308, EPI_ISL_4030489, EPI_ISL_4475419, EPI_ISL_4475420                                                                                                                                                                           | see above                                         | RSUD KEBAYORAN BARU                                                                                                                                                                                                                                                                                                                                                                                                                                                                                                                                      | Genomik Solidaritas Indonesia Laboratorium                                                                                                                                                                                                                                                                                                                                                                                                                                                                                                                                                                                                                                                     | Anna Christina Brazia; Annisa Muthiah Sukirman; Anuraj Shankar; Ariel Pradipta; Carissa Sintca Wijaya; David Hendra Haryanto; Dewi Isnawati Q.I.; Dhahlia Agustina Cahyono; Dwi Oktavia; Esti Rahayuning Tias; Gracia Felias Enos Korompis; Heru; Himawan Masyhuri; Juniar Dwi Jayanti; Louisa Markus; Melisa; Melly Ariyanti; Meutia Ayuputeri Kumaheri; Neng Hilma Hamidah; Ngabila Salama; Ollien Kartika; Pratiwi Srikandi Yudhastari; Reinhart Gabriel; Stefanus; Stefanus Bernard; Tiranti Vindha; Vania Gavrila Wikasa |
| EPI_ISL_2790721, EPI_ISL_2790722, EPI_ISL_2790723, EPI_ISL_2790730, EPI_ISL_3418696                                                                                                                                                                                                                                                                                                  | RSUD KEBAYORAN BARU / DINAS KESEHATAN DKI JAKARTA | Genomik Solidaritas Indonesia Laboratorium                                                                                                                                                                                                                                                                                                                                                                                                                                                                                                               |                                                                                                                                                                                                                                                                                                                                                                                                                                                                                                                                                                                                                                                                                                | Alfin Mohammad Abdillah; Anna Christina Brazia; Annisa Muthiah Sukirman; Anuraj Shankar; Ariel Pradipta; Ariel Pradipta Submitter information; Carissa Sintca Wijaya; Dhahlia Agustina Cahyono; Dwi Oktavia; Gracia Felias Enos Korompis; Meutia Ayuputeri Kumaheri; Ngabila Salama; Normastuti Adhini Tantyto; Reinhart Gabriel; Tiranti Vindha; Vania Gavrila Wikasa; Widayastuti                                                                                                                                           |
| EPI_ISL_3208082, EPI_ISL_3208083                                                                                                                                                                                                                                                                                                                                                     | RSUD KOJA / DINAS KESEHATAN DKI JAKARTA           | Genomik Solidaritas Indonesia Laboratorium                                                                                                                                                                                                                                                                                                                                                                                                                                                                                                               |                                                                                                                                                                                                                                                                                                                                                                                                                                                                                                                                                                                                                                                                                                | Annisa Muthiah Sukirman; Anuraj Shankar; Ariel Pradipta; Carissa Sintca Wijaya; Gracia Felias Enos Korompis; Meutia Ayuputeri Kumaheri; Reinhart Gabriel; Tryna Tania; Vania Gavrila Wikasa                                                                                                                                                                                                                                                                                                                                   |
| EPI_ISL_2987630, EPI_ISL_2987631, EPI_ISL_2987632, EPI_ISL_2987633, EPI_ISL_3216587, EPI_ISL_3216588, EPI_ISL_3216589, EPI_ISL_3216590, EPI_ISL_3216591, EPI_ISL_3216592, EPI_ISL_3216593, EPI_ISL_3216594, EPI_ISL_3216595                                                                                                                                                          | see above                                         | RSUD KRMT Wongsonegoro                                                                                                                                                                                                                                                                                                                                                                                                                                                                                                                                   | National Institute of Health Research and Development                                                                                                                                                                                                                                                                                                                                                                                                                                                                                                                                                                                                                                          | Arie Ardiansyah Nugraha; Fajar Nur Sulistiyohadi; Hana Apsari Pawestri; Hartanti Dian Ikawati; Kartika Dewi Pupa; Krisna Pangesti; Nelly Puspandari; Subangkit; Triyani Soekarso; Vivi Setiawaty                                                                                                                                                                                                                                                                                                                              |
| EPI_ISL_4969091, EPI_ISL_4969096, EPI_ISL_4969115, EPI_ISL_4969119                                                                                                                                                                                                                                                                                                                   | RSUD KRT. Setjonegoro Wonosobo                    | Genetics Working Group (Pokja Genetik) Faculty of Medicine, Public Health and Nursing Universitas Gadjah Mada (FK-KMK UGM); Disease Investigation Center Wates Ministry of Agriculture Indonesia; Department of Microbiology FK-KMK UGM; Laboratorium Diagnostik Yayasan Tahaia World Mosquito Program (WMP) Yogyakarta Center for Tropical Medicine FK-KMK UGM; Integrated Research Center FK-KMK UGM; Department of Computer Science and Electronics FMIPA UGM; RSUP Dr. Sardjito                                                                      | . Marcellus; Afiahayati; Alvina A Setiawan; Bambang Sigit Riyanto; Dwi AA Nugrahaningsih; Dwi Indaryati; Dyah A Puspitarani; Edwin W. Daniwijaya; Eggi Arguni; Eko Budiono; Endah Supriyati; Gunadi; Hana F Hanifin; Hendra Wibawa; Heni Retnowulan; Ika Trisnawati; Indarto Sulistiyono; Ira Puspitawati; Irene Tania; Khanza a Vujira; Kristy Iskandar; Ludhang P. Rizki; Marcellus; Mohamad S. Hakim; Munawar Gani; Nungki Anggorowati; Nur Imma Fatimah Harahap; Nur Rahmi Ananda; Osman Sianipar; Pramesti G Dewi; Riat El Khair; Satria Maulana; Siswanto; Sumardi; Susan Simanjaya; Titik Nuryastuti; Tri Wibawa; Umi Solekhan Intansari; Yunika Puspawadi; Elizabeth Henny Heringtiyas |                                                                                                                                                                                                                                                                                                                                                                                                                                                                                                                               |
| EPI_ISL_2047529                                                                                                                                                                                                                                                                                                                                                                      | RSUD Kab Buleleng                                 | National Institute of Health Research and Development                                                                                                                                                                                                                                                                                                                                                                                                                                                                                                    |                                                                                                                                                                                                                                                                                                                                                                                                                                                                                                                                                                                                                                                                                                | Arie Ardiansyah Nugraha; Hana Apsari Pawestri; Hartanti Dian Ikawati; Kartika Dewi Pupa; Krisna Pangesti; Nelly Puspandari; Subangkit; Triyani Soekarso; Vivi Setiawaty                                                                                                                                                                                                                                                                                                                                                       |
| EPI_ISL_2931750, EPI_ISL_2931759, EPI_ISL_2931769, EPI_ISL_2931770, EPI_ISL_2931777, EPI_ISL_2931779, EPI_ISL_2931786, EPI_ISL_2931795, EPI_ISL_2987591, EPI_ISL_5796078, EPI_ISL_5796079                                                                                                                                                                                            | see above                                         | RSUD Kabupaten Buleleng                                                                                                                                                                                                                                                                                                                                                                                                                                                                                                                                  | National Institute of Health Research and Development                                                                                                                                                                                                                                                                                                                                                                                                                                                                                                                                                                                                                                          | ; Arie Ardiansyah Nugraha; Fajar Nur Sulistiyohadi; Hana Apsari Pawestri; Hartanti Dian Ikawati; Kartika Dewi Pupa; Krisna Pangesti; Nelly Puspandari; Subangkit; Triyani Soekarso; Vivi Setiawaty                                                                                                                                                                                                                                                                                                                            |
| EPI_ISL_5796076, EPI_ISL_5796077, EPI_ISL_5796085                                                                                                                                                                                                                                                                                                                                    | RSUD Kabupaten Tabanan                            | National Institute of Health Research and Development                                                                                                                                                                                                                                                                                                                                                                                                                                                                                                    |                                                                                                                                                                                                                                                                                                                                                                                                                                                                                                                                                                                                                                                                                                | Arie Ardiansyah Nugraha; Fajar Nur Sulistiyohadi; Hana Apsari Pawestri; Hartanti Dian Ikawati; Kartika Dewi Pupa; Krisna Pangesti; Nelly Puspandari; Subangkit; Triyani Soekarso; Vivi Setiawaty                                                                                                                                                                                                                                                                                                                              |
| EPI_ISL_5022907, EPI_ISL_5022908, EPI_ISL_5022909, EPI_ISL_5022910                                                                                                                                                                                                                                                                                                                   | RSUD Kabupaten Teluk Bintuni Papua Barat          | National Institute of Health Research and Development                                                                                                                                                                                                                                                                                                                                                                                                                                                                                                    |                                                                                                                                                                                                                                                                                                                                                                                                                                                                                                                                                                                                                                                                                                | Arie Ardiansyah Nugraha; Fajar Nur Sulistiyohadi; Hana Apsari Pawestri; Hartanti Dian Ikawati; Kartika Dewi Pupa; Krisna Pangesti; Nelly Puspandari; Subangkit; Triyani Soekarso; Vivi Setiawaty                                                                                                                                                                                                                                                                                                                              |

|                                                                                                                                                                                                                                                                                                                                                                                                                                                                                                                                                                                                                                                                                                                                                                                                                                                                                                                                                                                                                                                                                                                                                                                                                                                                                                                                                                                                                                                                                                     |                                                           |                                                                                                                                                                                                                                                                                                                                                                                                                                                                                     |                                                                                                                                                                                                                                                                                                                                                                                                                                                                                                                                                                                                                                                                                                                               |                                                                                                                                                                                                                                                                                                                                                                                                      |
|-----------------------------------------------------------------------------------------------------------------------------------------------------------------------------------------------------------------------------------------------------------------------------------------------------------------------------------------------------------------------------------------------------------------------------------------------------------------------------------------------------------------------------------------------------------------------------------------------------------------------------------------------------------------------------------------------------------------------------------------------------------------------------------------------------------------------------------------------------------------------------------------------------------------------------------------------------------------------------------------------------------------------------------------------------------------------------------------------------------------------------------------------------------------------------------------------------------------------------------------------------------------------------------------------------------------------------------------------------------------------------------------------------------------------------------------------------------------------------------------------------|-----------------------------------------------------------|-------------------------------------------------------------------------------------------------------------------------------------------------------------------------------------------------------------------------------------------------------------------------------------------------------------------------------------------------------------------------------------------------------------------------------------------------------------------------------------|-------------------------------------------------------------------------------------------------------------------------------------------------------------------------------------------------------------------------------------------------------------------------------------------------------------------------------------------------------------------------------------------------------------------------------------------------------------------------------------------------------------------------------------------------------------------------------------------------------------------------------------------------------------------------------------------------------------------------------|------------------------------------------------------------------------------------------------------------------------------------------------------------------------------------------------------------------------------------------------------------------------------------------------------------------------------------------------------------------------------------------------------|
| EPI_ISL_2631469, EPI_ISL_2631470, EPI_ISL_2631471, EPI_ISL_2631472, EPI_ISL_2631473, EPI_ISL_2631474, EPI_ISL_2631475, EPI_ISL_2631476, EPI_ISL_2631477                                                                                                                                                                                                                                                                                                                                                                                                                                                                                                                                                                                                                                                                                                                                                                                                                                                                                                                                                                                                                                                                                                                                                                                                                                                                                                                                             |                                                           |                                                                                                                                                                                                                                                                                                                                                                                                                                                                                     | Indonesian Institute of Sciences (LIPI) National Agency of Research and Innovation (BRIN) and National Institute of Health Research and Development (NIHRD)                                                                                                                                                                                                                                                                                                                                                                                                                                                                                                                                                                   | ; Andri Wardiana; Anggia Prasetyoputri; Anik B. Dharmayanthi; Eko Wahyu Putro; Fahrurrozi; Gita Syahputra; Herjuno A. Nugroho; Idris; Indriawati; Isa Nuryana; Linda Sukmarini; Listiana Oktavia; Nova D. Yanthi; Puspita Lisdianti; Rath A. Ningrum; Sri Swasthikawati; Subangkit; Sugiyono Saputra; Syam B. Iryanto; Vivi Setiawaty; Vivi Setiawaty Puspita Lisdianti; Yayuk Sri Rahayu; Yuliawati |
| see above                                                                                                                                                                                                                                                                                                                                                                                                                                                                                                                                                                                                                                                                                                                                                                                                                                                                                                                                                                                                                                                                                                                                                                                                                                                                                                                                                                                                                                                                                           | RSUD Karawang                                             |                                                                                                                                                                                                                                                                                                                                                                                                                                                                                     |                                                                                                                                                                                                                                                                                                                                                                                                                                                                                                                                                                                                                                                                                                                               |                                                                                                                                                                                                                                                                                                                                                                                                      |
| EPI_ISL_2758647                                                                                                                                                                                                                                                                                                                                                                                                                                                                                                                                                                                                                                                                                                                                                                                                                                                                                                                                                                                                                                                                                                                                                                                                                                                                                                                                                                                                                                                                                     | RSUD Kebayoran Baru                                       | Genomik Solidaritas Indonesia Laboratorium                                                                                                                                                                                                                                                                                                                                                                                                                                          | Ahmad Zoebad Foeady; Alfin Mohammad Abdullah; Annisa Muthiah Sukirman; Anuraj Shankar; Ariel Pradipta; Carissa Sintca Wijaya; Dhahlia Agustina Cahyono; Gracia Felias Enos Korompis; Meutia Ayuputeri Kumaheri; Normastuti Adhini Tantygo; Vania Gavrla Wikasa                                                                                                                                                                                                                                                                                                                                                                                                                                                                |                                                                                                                                                                                                                                                                                                                                                                                                      |
| EPI_ISL_2617536                                                                                                                                                                                                                                                                                                                                                                                                                                                                                                                                                                                                                                                                                                                                                                                                                                                                                                                                                                                                                                                                                                                                                                                                                                                                                                                                                                                                                                                                                     | RSUD Kebayoran Baru                                       | National Institute of Health Research and Development                                                                                                                                                                                                                                                                                                                                                                                                                               | Arie Ardiansyah Nugraha; Hana Apsari Pawestri; Hartanti Dian Ikawati; Kartika Dewi Puspa; Krisna Pangesti; Nelly Puspandari; Subangkit; Triyani Soekarso; Vivi Setiawaty                                                                                                                                                                                                                                                                                                                                                                                                                                                                                                                                                      |                                                                                                                                                                                                                                                                                                                                                                                                      |
| EPI_ISL_2101229, EPI_ISL_2101230, EPI_ISL_2101231, EPI_ISL_2101232, EPI_ISL_2101233, EPI_ISL_2101234, EPI_ISL_2101235, EPI_ISL_2101236, EPI_ISL_2101237, EPI_ISL_2101238, EPI_ISL_2101239, EPI_ISL_2101240, EPI_ISL_2101241, EPI_ISL_2101242, EPI_ISL_2101243, EPI_ISL_2101244, EPI_ISL_2101245, EPI_ISL_2101246, EPI_ISL_2101247, EPI_ISL_2101248, EPI_ISL_2101249, EPI_ISL_2101250, EPI_ISL_2101251, EPI_ISL_2101252, EPI_ISL_2101253, EPI_ISL_2101254, EPI_ISL_2101255                                                                                                                                                                                                                                                                                                                                                                                                                                                                                                                                                                                                                                                                                                                                                                                                                                                                                                                                                                                                                           |                                                           |                                                                                                                                                                                                                                                                                                                                                                                                                                                                                     |                                                                                                                                                                                                                                                                                                                                                                                                                                                                                                                                                                                                                                                                                                                               |                                                                                                                                                                                                                                                                                                                                                                                                      |
| see above                                                                                                                                                                                                                                                                                                                                                                                                                                                                                                                                                                                                                                                                                                                                                                                                                                                                                                                                                                                                                                                                                                                                                                                                                                                                                                                                                                                                                                                                                           | RSUD Klungkung                                            | Eijkman Institute for Molecular Biology, National Agency for Research and Innovation; Molecular Biology Laboratory, Faculty Medicine and Health Sciences, Warmadewa University                                                                                                                                                                                                                                                                                                      | Amin Soebandrio; Edison Johar; Eryl Sintya; Filasita A Yudhaputri; Hidayat Trimarsanto; I Komang Parwata; Iskandar Adnan; Khin Saw Myint; Lidwina Priliani; Lydia V. Panggalo; Muhammad Rezki Rasyak; Safarina G Malik; Sri Masenyi; Sukma Oktavianthi; Willy Agustine                                                                                                                                                                                                                                                                                                                                                                                                                                                        |                                                                                                                                                                                                                                                                                                                                                                                                      |
| EPI_ISL_775598                                                                                                                                                                                                                                                                                                                                                                                                                                                                                                                                                                                                                                                                                                                                                                                                                                                                                                                                                                                                                                                                                                                                                                                                                                                                                                                                                                                                                                                                                      | RSUD Kota Mataram                                         | National Institute of Health Research and Development                                                                                                                                                                                                                                                                                                                                                                                                                               | AA; HA; HD; Ikawati; KD; KNA; N; Nugraha; Pangesti; Pawestri; Puspa; Puspandari; SK; Sari; Setiawaty; Soekarso; Subangkit; T; V                                                                                                                                                                                                                                                                                                                                                                                                                                                                                                                                                                                               |                                                                                                                                                                                                                                                                                                                                                                                                      |
| EPI_ISL_4090561, EPI_ISL_4090562, EPI_ISL_4090563, EPI_ISL_4090564, EPI_ISL_4090565                                                                                                                                                                                                                                                                                                                                                                                                                                                                                                                                                                                                                                                                                                                                                                                                                                                                                                                                                                                                                                                                                                                                                                                                                                                                                                                                                                                                                 | RSUD Kota Surakarta                                       | National Institute of Health Research and Development                                                                                                                                                                                                                                                                                                                                                                                                                               | Arie Ardiansyah Nugraha; Fajar Nur; Fajar Nur Sulistiyohadi; Hana Apsari Pawestri; Hartanti Dian Ikawati; Kartika Dewi Puspa; Krisna Pangesti; Nelly Puspandari; Subangkit; Sulistiyohadi; Triyani Soekarso; Vivi Setiawaty                                                                                                                                                                                                                                                                                                                                                                                                                                                                                                   |                                                                                                                                                                                                                                                                                                                                                                                                      |
| EPI_ISL_763068                                                                                                                                                                                                                                                                                                                                                                                                                                                                                                                                                                                                                                                                                                                                                                                                                                                                                                                                                                                                                                                                                                                                                                                                                                                                                                                                                                                                                                                                                      | RSUD Kota Surakarta                                       | Universitas Sebelas Maret (UNS); Rumah Sakit UNS (RS-UNS); National Institute of Health Research and Development, Indonesian Ministry of Health.                                                                                                                                                                                                                                                                                                                                    | Aff A Ghufroin; Arie A Nugraha; Betty Suryawati.; Dewi Puspa; Hana A Pawestri; Hartanti Dian Ika; Hartono; Kartika; Maryani; Revi G H Novika; Vivi Setiawaty; Yulia Sari                                                                                                                                                                                                                                                                                                                                                                                                                                                                                                                                                      |                                                                                                                                                                                                                                                                                                                                                                                                      |
| EPI_ISL_2854719                                                                                                                                                                                                                                                                                                                                                                                                                                                                                                                                                                                                                                                                                                                                                                                                                                                                                                                                                                                                                                                                                                                                                                                                                                                                                                                                                                                                                                                                                     | RSUD Kota Tangerang                                       | National Institute of Health Research and Development                                                                                                                                                                                                                                                                                                                                                                                                                               | ; Arie Ardiansyah Nugraha; Hana Apsari Pawestri; Hartanti Dian Ikawati; Kartika Dewi Puspa; Krisna Pangesti; Nelly Puspandari; Subangkit; Triyani Soekarso; Vivi Setiawaty                                                                                                                                                                                                                                                                                                                                                                                                                                                                                                                                                    |                                                                                                                                                                                                                                                                                                                                                                                                      |
| EPI_ISL_3836267, EPI_ISL_3836268                                                                                                                                                                                                                                                                                                                                                                                                                                                                                                                                                                                                                                                                                                                                                                                                                                                                                                                                                                                                                                                                                                                                                                                                                                                                                                                                                                                                                                                                    | RSUD MAMPANG PRAPATAN                                     | Genomik Solidaritas Indonesia Laboratorium                                                                                                                                                                                                                                                                                                                                                                                                                                          | Anna Christina Brazia; Annisa Muthiah Sukirman; Anuraj Shankar; Ariel Pradipta; David Hendra Haryanto; Dhahlia Agustina Cahyono; Didiet Adi Permana; Dwi Oktavia; Gracia Felias Enos Korompis; Louisa Markus; Meutia Ayuputeri Kumaheri; Ngabila Salama; Pratiwi Srikandi Yudhastari; Reinhart Gabriel; Tiranti Vindha; Vania Gavrla Wikasa                                                                                                                                                                                                                                                                                                                                                                                   |                                                                                                                                                                                                                                                                                                                                                                                                      |
| EPI_ISL_3208077                                                                                                                                                                                                                                                                                                                                                                                                                                                                                                                                                                                                                                                                                                                                                                                                                                                                                                                                                                                                                                                                                                                                                                                                                                                                                                                                                                                                                                                                                     | RSUD MATRAMAN / DINAS KESEHATAN DKI JAKARTA               | Genomik Solidaritas Indonesia Laboratorium                                                                                                                                                                                                                                                                                                                                                                                                                                          | Annisa Muthiah Sukirman; Anuraj Shankar; Ariel Pradipta; Carissa Sintca Wijaya; Gracia Felias Enos Korompis; Meutia Ayuputeri Kumaheri; Reinhart Gabriel; Tryna Tania; Vania Gavrla Wikasa                                                                                                                                                                                                                                                                                                                                                                                                                                                                                                                                    |                                                                                                                                                                                                                                                                                                                                                                                                      |
| EPI_ISL_3138795                                                                                                                                                                                                                                                                                                                                                                                                                                                                                                                                                                                                                                                                                                                                                                                                                                                                                                                                                                                                                                                                                                                                                                                                                                                                                                                                                                                                                                                                                     | RSUD Mampang                                              | National Institute of Health Research and Development                                                                                                                                                                                                                                                                                                                                                                                                                               | Arie Ardiansyah Nugraha; Fajar Nur Sulistiyohadi; Hana Apsari Pawestri; Hartanti Dian Ikawati; Kartika Dewi Puspa; Krisna Pangesti; Nelly Puspandari; Subangkit; Triyani Soekarso; Vivi Setiawaty                                                                                                                                                                                                                                                                                                                                                                                                                                                                                                                             |                                                                                                                                                                                                                                                                                                                                                                                                      |
| EPI_ISL_2101256, EPI_ISL_2101257, EPI_ISL_2101258, EPI_ISL_2101259, EPI_ISL_2101260, EPI_ISL_2101261, EPI_ISL_2101262, EPI_ISL_2101263, EPI_ISL_2101264, EPI_ISL_2101265, EPI_ISL_2101266, EPI_ISL_2101267, EPI_ISL_2101268, EPI_ISL_2101269, EPI_ISL_2101270, EPI_ISL_2101271, EPI_ISL_2101272, EPI_ISL_2101273, EPI_ISL_2101274, EPI_ISL_2101275, EPI_ISL_2101276, EPI_ISL_2101277, EPI_ISL_2101278, EPI_ISL_2101279, EPI_ISL_2101280, EPI_ISL_2101281, EPI_ISL_2101282, EPI_ISL_2101283, EPI_ISL_2101284, EPI_ISL_2101285, EPI_ISL_2101286, EPI_ISL_2101287, EPI_ISL_2101288, EPI_ISL_2101290, EPI_ISL_2101291, EPI_ISL_2101292, EPI_ISL_2101293, EPI_ISL_2101294, EPI_ISL_2101295, EPI_ISL_2101296, EPI_ISL_2101297, EPI_ISL_2101298, EPI_ISL_2101299, EPI_ISL_2101300, EPI_ISL_2101301, EPI_ISL_2101302, EPI_ISL_2101303, EPI_ISL_2101304, EPI_ISL_2101305, EPI_ISL_2101306, EPI_ISL_2101307, EPI_ISL_2101308, EPI_ISL_2101309, EPI_ISL_2101310, EPI_ISL_2101311, EPI_ISL_2101312, EPI_ISL_2101313, EPI_ISL_2101314, EPI_ISL_2101316, EPI_ISL_2101317, EPI_ISL_2101318, EPI_ISL_2101319, EPI_ISL_2101320, EPI_ISL_2101321, EPI_ISL_2101322, EPI_ISL_2101323, EPI_ISL_2101324, EPI_ISL_2101325, EPI_ISL_2101326, EPI_ISL_2101327, EPI_ISL_2101328, EPI_ISL_2101329, EPI_ISL_2101330, EPI_ISL_2101331, EPI_ISL_2101332, EPI_ISL_2101333, EPI_ISL_2101334, EPI_ISL_2101335, EPI_ISL_2101336, EPI_ISL_2101337, EPI_ISL_2101338, EPI_ISL_2101339, EPI_ISL_2101340, EPI_ISL_2101341, EPI_ISL_2101342 |                                                           |                                                                                                                                                                                                                                                                                                                                                                                                                                                                                     |                                                                                                                                                                                                                                                                                                                                                                                                                                                                                                                                                                                                                                                                                                                               |                                                                                                                                                                                                                                                                                                                                                                                                      |
| see above                                                                                                                                                                                                                                                                                                                                                                                                                                                                                                                                                                                                                                                                                                                                                                                                                                                                                                                                                                                                                                                                                                                                                                                                                                                                                                                                                                                                                                                                                           | RSUD Mangusada                                            | Eijkman Institute for Molecular Biology, National Agency for Research and Innovation; Molecular Biology Laboratory, Faculty Medicine and Health Sciences, Warmadewa University                                                                                                                                                                                                                                                                                                      | Amin Soebandrio; Edison Johar; Eryl Sintya; Filasita A Yudhaputri; Hidayat Trimarsanto; Ida Ayu Wayan Mahayani; Iskandar Adnan; Khin Saw Myint; Lidwina Priliani; Lydia V. Panggalo; Muhammad Rezki Rasyak; Safarina G Malik; Sri Masenyi; Sukma Oktavianthi; Willy Agustine                                                                                                                                                                                                                                                                                                                                                                                                                                                  |                                                                                                                                                                                                                                                                                                                                                                                                      |
| EPI_ISL_3030003, EPI_ISL_3030004, EPI_ISL_3030005, EPI_ISL_3030006, EPI_ISL_3030007, EPI_ISL_3030008, EPI_ISL_3030009, EPI_ISL_3030010, EPI_ISL_3030011, EPI_ISL_3030012, EPI_ISL_3030013, EPI_ISL_3030014, EPI_ISL_3030015, EPI_ISL_3030016, EPI_ISL_3030017, EPI_ISL_3030018, EPI_ISL_3030019, EPI_ISL_3030020, EPI_ISL_3030021, EPI_ISL_3030022, EPI_ISL_3030023, EPI_ISL_3030024, EPI_ISL_3030025, EPI_ISL_3030026, EPI_ISL_3030027, EPI_ISL_3030028, EPI_ISL_3030029, EPI_ISL_3030030, EPI_ISL_3030031, EPI_ISL_3030032, EPI_ISL_3030033, EPI_ISL_3030034, EPI_ISL_3030035, EPI_ISL_3030036, EPI_ISL_3030037, EPI_ISL_3030038, EPI_ISL_3030039                                                                                                                                                                                                                                                                                                                                                                                                                                                                                                                                                                                                                                                                                                                                                                                                                                                 |                                                           |                                                                                                                                                                                                                                                                                                                                                                                                                                                                                     |                                                                                                                                                                                                                                                                                                                                                                                                                                                                                                                                                                                                                                                                                                                               |                                                                                                                                                                                                                                                                                                                                                                                                      |
| see above                                                                                                                                                                                                                                                                                                                                                                                                                                                                                                                                                                                                                                                                                                                                                                                                                                                                                                                                                                                                                                                                                                                                                                                                                                                                                                                                                                                                                                                                                           | RSUD Mangusada                                            | Eijkman Institute for Molecular Biology, National Research and Innovation Agency; Faculty Medicine and Health Sciences, Warmadewa University                                                                                                                                                                                                                                                                                                                                        | Amin Soebandrio; Edison Johar; Eryl Sintya; Filasita A Yudhaputri; Hidayat Trimarsanto; Ida Ayu Wayan Mahayani; Iskandar Adnan; Khin Saw Myint; Lidwina Priliani; Lydia V. Panggalo; Muhammad Rezki Rasyak; Safarina G Malik; Sri Masenyi; Sukma Oktavianthi; Willy Agustine                                                                                                                                                                                                                                                                                                                                                                                                                                                  |                                                                                                                                                                                                                                                                                                                                                                                                      |
| EPI_ISL_3138885                                                                                                                                                                                                                                                                                                                                                                                                                                                                                                                                                                                                                                                                                                                                                                                                                                                                                                                                                                                                                                                                                                                                                                                                                                                                                                                                                                                                                                                                                     | RSUD Mangusada Badung                                     | National Institute of Health Research and Development                                                                                                                                                                                                                                                                                                                                                                                                                               | Arie Ardiansyah Nugraha; Fajar Nur Sulistiyohadi; Hana Apsari Pawestri; Hartanti Dian Ikawati; Kartika Dewi Puspa; Krisna Pangesti; Nelly Puspandari; Subangkit; Triyani Soekarso; Vivi Setiawaty                                                                                                                                                                                                                                                                                                                                                                                                                                                                                                                             |                                                                                                                                                                                                                                                                                                                                                                                                      |
| EPI_ISL_2617514, EPI_ISL_2617515, EPI_ISL_2620712                                                                                                                                                                                                                                                                                                                                                                                                                                                                                                                                                                                                                                                                                                                                                                                                                                                                                                                                                                                                                                                                                                                                                                                                                                                                                                                                                                                                                                                   | RSUD Mataram Prov Nusa Tenggara Barat                     | National Institute of Health Research and Development                                                                                                                                                                                                                                                                                                                                                                                                                               | Arie Ardiansyah Nugraha; Hana Apsari Pawestri; Hartanti Dian Ikawati; Kartika Dewi Puspa; Krisna Pangesti; Nelly Puspandari; Subangkit; Triyani Soekarso; Vivi Setiawaty                                                                                                                                                                                                                                                                                                                                                                                                                                                                                                                                                      |                                                                                                                                                                                                                                                                                                                                                                                                      |
| EPI_ISL_791986                                                                                                                                                                                                                                                                                                                                                                                                                                                                                                                                                                                                                                                                                                                                                                                                                                                                                                                                                                                                                                                                                                                                                                                                                                                                                                                                                                                                                                                                                      | RSUD Morotai Maluku Utara                                 | National Institute of Health Research and Development                                                                                                                                                                                                                                                                                                                                                                                                                               | AA; Denggo; HA; HD; Ikawati; KD; KNA; N; Nugraha; Pangesti; Pawestri; Puspa; Puspandari; SD; Setiawaty; Soekarso; Subangkit; T; V                                                                                                                                                                                                                                                                                                                                                                                                                                                                                                                                                                                             |                                                                                                                                                                                                                                                                                                                                                                                                      |
| EPI_ISL_2854730, EPI_ISL_4104532, EPI_ISL_4104533, EPI_ISL_4104534, EPI_ISL_4104535, EPI_ISL_4104536, EPI_ISL_4104537                                                                                                                                                                                                                                                                                                                                                                                                                                                                                                                                                                                                                                                                                                                                                                                                                                                                                                                                                                                                                                                                                                                                                                                                                                                                                                                                                                               |                                                           |                                                                                                                                                                                                                                                                                                                                                                                                                                                                                     |                                                                                                                                                                                                                                                                                                                                                                                                                                                                                                                                                                                                                                                                                                                               |                                                                                                                                                                                                                                                                                                                                                                                                      |
| see above                                                                                                                                                                                                                                                                                                                                                                                                                                                                                                                                                                                                                                                                                                                                                                                                                                                                                                                                                                                                                                                                                                                                                                                                                                                                                                                                                                                                                                                                                           | RSUD Nganjuk                                              | National Institute of Health Research and Development                                                                                                                                                                                                                                                                                                                                                                                                                               | ; Arie Ardiansyah Nugraha; Fajar Nur Sulistiyohadi; Hana Apsari Pawestri; Hartanti Dian Ikawati; Kartika Dewi Puspa; Krisna Pangesti; Nelly Puspandari; Subangkit; Triyani Soekarso; Vivi Setiawaty                                                                                                                                                                                                                                                                                                                                                                                                                                                                                                                           |                                                                                                                                                                                                                                                                                                                                                                                                      |
| EPI_ISL_516829                                                                                                                                                                                                                                                                                                                                                                                                                                                                                                                                                                                                                                                                                                                                                                                                                                                                                                                                                                                                                                                                                                                                                                                                                                                                                                                                                                                                                                                                                      | RSUD Nyi Ageng Serang                                     | Genetics Working Group (Pokja Genetik) Faculty of Medicine, Public Health and Nursing Universitas Gadjah Mada (FK-KMK UGM); Disease Investigation Center Wates Ministry of Agriculture Indonesia; Department of Microbiology FK-KMK UGM; Laboratorium Diagnostik Yayasan Tahjia World Mosquito Program (WMP) Yogyakarta Center for Tropical Medicine FK-KMK UGM; Integrated Research Center FK-KMK UGM; Department of Computer Science and Electronics FMIPA UGM                    | Marcellus; Siswanto; Afiahayati; Beby Dewi Sartika; Dwi AA Nugrahaningsih; Dyah Ayu Puspitarani; Edwin W. Daniwijaya; Eggi Arguni; Endah Supriyati; Gunadi; Hendra Wibawa; Ludhang P. Rizki; Mohamad S. Hakim; Titik Nuryastuti; Tri Wibawa                                                                                                                                                                                                                                                                                                                                                                                                                                                                                   |                                                                                                                                                                                                                                                                                                                                                                                                      |
| EPI_ISL_4978455, EPI_ISL_4980931, EPI_ISL_4981198, EPI_ISL_4981563, EPI_ISL_5010016, EPI_ISL_5010036, EPI_ISL_5010038, EPI_ISL_5010046, EPI_ISL_5010054, EPI_ISL_5010412                                                                                                                                                                                                                                                                                                                                                                                                                                                                                                                                                                                                                                                                                                                                                                                                                                                                                                                                                                                                                                                                                                                                                                                                                                                                                                                            | see above                                                 | Genetics Working Group (Pokja Genetik) Faculty of Medicine, Public Health and Nursing Universitas Gadjah Mada (FK-KMK UGM); Disease Investigation Center Wates Ministry of Agriculture Indonesia; Department of Microbiology FK-KMK UGM; Laboratorium Diagnostik Yayasan Tahjia World Mosquito Program (WMP) Yogyakarta Center for Tropical Medicine FK-KMK UGM; Integrated Research Center FK-KMK UGM; Department of Computer Science and Electronics FMIPA UGM; RSUD Dr. Sardjito | Marcellus; Afiahayati; Alvina A Setiawan; Bambang Sigit Riyanto; Cita S Amalia; Dwi AA Nugrahaningsih; Dwi Indaryati; Dyah A Puspitarani; Edwin W. Daniwijaya; Eggi Arguni; Eko Budiono; Endah Supriyati; Gunadi; Hana F Hanifin; Hendra Wibawa; Heni Retnowulan; I Putu Aditio A; Ika Trisnawati; Indarto Sulistiyono; Ira Puspitawati; Irene Tania; Khanza A Nurhika; Kristy Iskandar; Ludhang P. Rizki; Marcellus; Mohamad S. Hakim; Munawar Gani; Nungki Anggorowati; Nur Imma Fatimah Harahap; Nur Rahmi Ananda; Osman Sianipar; Pramesti G Dewi; Riat El Khari; Satria Maulana; Siswanto; Sumardi; Susan Simanjaya; Titik Nuryastuti; Tri Wibawa; Umi Solekha Intansari; Yunkika Puspadewi; Elizabeth Henny Hemingtiyas |                                                                                                                                                                                                                                                                                                                                                                                                      |
| EPI_ISL_2790731                                                                                                                                                                                                                                                                                                                                                                                                                                                                                                                                                                                                                                                                                                                                                                                                                                                                                                                                                                                                                                                                                                                                                                                                                                                                                                                                                                                                                                                                                     | RSUD PASAR MINGGU / DINAS KESEHATAN DKI JAKARTA           | Genomik Solidaritas Indonesia Laboratorium                                                                                                                                                                                                                                                                                                                                                                                                                                          | Alfin Mohammad Abdullah; Anna Christina Brazia; Annisa Muthiah Sukirman; Anuraj Shankar; Ariel Pradipta; Carissa Sintca Wijaya; Dhahlia Agustina Cahyono; Dwi Oktavia; Gracia Felias Enos Korompis; Meutia Ayuputeri Kumaheri; Ngabila Salama; Normastuti Adhini Tantygo; Reinhart Gabriel; Tiranti Vindha; Vania Gavrla Wikasa; Widayastuti                                                                                                                                                                                                                                                                                                                                                                                  |                                                                                                                                                                                                                                                                                                                                                                                                      |
| EPI_ISL_3384770, EPI_ISL_3384771, EPI_ISL_3384772, EPI_ISL_3384773, EPI_ISL_3384774, EPI_ISL_3384775, EPI_ISL_3384776, EPI_ISL_3384777, EPI_ISL_3384778, EPI_ISL_3384779, EPI_ISL_3384780, EPI_ISL_3384781, EPI_ISL_3384782, EPI_ISL_3384783, EPI_ISL_3385398, EPI_ISL_3385399, EPI_ISL_3385400, EPI_ISL_3385401, EPI_ISL_33854279                                                                                                                                                                                                                                                                                                                                                                                                                                                                                                                                                                                                                                                                                                                                                                                                                                                                                                                                                                                                                                                                                                                                                                  | see above                                                 | Genomik Solidaritas Indonesia Laboratorium                                                                                                                                                                                                                                                                                                                                                                                                                                          | Annisa Muthiah Sukirman; Anuraj Shankar; Ariel Pradipta; Carissa Sintca Wijaya; Dhahlia Agustina Cahyono; Gracia Felias Enos Korompis; Himawan Masyhuri; Louisa Markus; Meutia Ayuputeri Kumaheri; Vania Gavrla Wikasa                                                                                                                                                                                                                                                                                                                                                                                                                                                                                                        |                                                                                                                                                                                                                                                                                                                                                                                                      |
| EPI_ISL_2868904                                                                                                                                                                                                                                                                                                                                                                                                                                                                                                                                                                                                                                                                                                                                                                                                                                                                                                                                                                                                                                                                                                                                                                                                                                                                                                                                                                                                                                                                                     | RSUD Pademangan                                           | National Institute of Health Research and Development                                                                                                                                                                                                                                                                                                                                                                                                                               | Arie Ardiansyah Nugraha; Hana Apsari Pawestri; Hartanti Dian Ikawati; Kartika Dewi Puspa; Krisna Pangesti; Nelly Puspandari; Subangkit; Triyani Soekarso; Vivi Setiawaty                                                                                                                                                                                                                                                                                                                                                                                                                                                                                                                                                      |                                                                                                                                                                                                                                                                                                                                                                                                      |
| EPI_ISL_2854683, EPI_ISL_2854684, EPI_ISL_2854685, EPI_ISL_2854686, EPI_ISL_2854687, EPI_ISL_2854688, EPI_ISL_2854689, EPI_ISL_2896202, EPI_ISL_2932711, EPI_ISL_3138949                                                                                                                                                                                                                                                                                                                                                                                                                                                                                                                                                                                                                                                                                                                                                                                                                                                                                                                                                                                                                                                                                                                                                                                                                                                                                                                            | see above                                                 | National Institute of Health Research and Development                                                                                                                                                                                                                                                                                                                                                                                                                               | Arie Ardiansyah Nugraha; Fajar Nur Sulistiyohadi; Hana Apsari Pawestri; Hartanti Dian Ikawati; Kartika Dewi Puspa; Krisna Pangesti; Nelly Puspandari; Subangkit; Triyani Soekarso; Vivi Setiawaty                                                                                                                                                                                                                                                                                                                                                                                                                                                                                                                             |                                                                                                                                                                                                                                                                                                                                                                                                      |
| EPI_ISL_2954064                                                                                                                                                                                                                                                                                                                                                                                                                                                                                                                                                                                                                                                                                                                                                                                                                                                                                                                                                                                                                                                                                                                                                                                                                                                                                                                                                                                                                                                                                     | RSUD Panembahan Senopati, Bantul                          | Genetics Working Group (Pokja Genetik) Faculty of Medicine, Public Health and Nursing Universitas Gadjah Mada (FK-KMK UGM); Disease Investigation Center Wates Ministry of Agriculture Indonesia; Department of Microbiology FK-KMK UGM; Laboratorium Diagnostik Yayasan Tahjia World Mosquito Program (WMP) Yogyakarta Center for Tropical Medicine FK-KMK UGM; Integrated Research Center FK-KMK UGM; Department of Computer                                                      | Afiahayati; Dwi AA Nugrahaningsih; Dwi Indaryati; Edwin W. Daniwijaya; Eggi Arguni; Endah Supriyati; Gunadi; Hana F Hanifin; Hendra Wibawa; Indarto Sulistiyono; Irene Tania; Kristy Iskandar; Ludhang P. Rizki; Marcellus; Mohamad S. Hakim; Nungki Anggorowati; Pramesti G Dewi; Siswanto; Titik Nuryastuti; Tri Wibawa                                                                                                                                                                                                                                                                                                                                                                                                     |                                                                                                                                                                                                                                                                                                                                                                                                      |
| EPI_ISL_4279162, EPI_ISL_4279163, EPI_ISL_4279164, EPI_ISL_4279165, EPI_ISL_4279166, EPI_ISL_4279167, EPI_ISL_4279168, EPI_ISL_4279169, EPI_ISL_4279170, EPI_ISL_4279171, EPI_ISL_4279172, EPI_ISL_4279173, EPI_ISL_4279174, EPI_ISL_4279175, EPI_ISL_4279176, EPI_ISL_4279177, EPI_ISL_4279178                                                                                                                                                                                                                                                                                                                                                                                                                                                                                                                                                                                                                                                                                                                                                                                                                                                                                                                                                                                                                                                                                                                                                                                                     | see above                                                 | National Institute of Health Research and Development                                                                                                                                                                                                                                                                                                                                                                                                                               | Arie Ardiansyah Nugraha; Fajar Nur; Fajar Nur Sulistiyohadi; Hana Apsari Pawestri; Hartanti Dian Ikawati; Kartika Dewi Puspa; Krisna Pangesti; Nelly Puspandari; Subangkit; Sulistiyohadi; Triyani Soekarso; Vivi Setiawaty                                                                                                                                                                                                                                                                                                                                                                                                                                                                                                   |                                                                                                                                                                                                                                                                                                                                                                                                      |
| EPI_ISL_4417895, EPI_ISL_4417903, EPI_ISL_4417904, EPI_ISL_4417908                                                                                                                                                                                                                                                                                                                                                                                                                                                                                                                                                                                                                                                                                                                                                                                                                                                                                                                                                                                                                                                                                                                                                                                                                                                                                                                                                                                                                                  | RSUD Pasar Minggu / EIJKMAN OXFORD CLINICAL RESEARCH UNIT | Genomik Solidaritas Indonesia Laboratorium                                                                                                                                                                                                                                                                                                                                                                                                                                          | Anis Karuniawati; Annisa Muthiah Sukirman; Anuraj Shankar; Ariel Pradipta; Carissa Sintca Wijaya; Decy Subekti; Dhahlia Agustina Cahyono; Dian Tri Wahyudi; Dwi Utomo Nusantara; Gracia Felias Enos Korompis; Himawan Masyhuri; Louisa Markus; Meutia Ayuputeri Kumaheri; Raph Hamers; Robert Sinto; Stefanus Bernardi; Suwarti                                                                                                                                                                                                                                                                                                                                                                                               |                                                                                                                                                                                                                                                                                                                                                                                                      |
| EPI_ISL_1300521                                                                                                                                                                                                                                                                                                                                                                                                                                                                                                                                                                                                                                                                                                                                                                                                                                                                                                                                                                                                                                                                                                                                                                                                                                                                                                                                                                                                                                                                                     | RSUD Pasaringgu                                           | Stem Cell Lab, Universitas Pembangunan Nasional Veteran Jakarta                                                                                                                                                                                                                                                                                                                                                                                                                     | Andri Pramesyanti Pramono; Megadianty Mokoginta; Ria Maria Theresa; Yudhi Nugraha; Yudi Amiarno                                                                                                                                                                                                                                                                                                                                                                                                                                                                                                                                                                                                                               |                                                                                                                                                                                                                                                                                                                                                                                                      |
| EPI_ISL_1300496, EPI_ISL_1300522, EPI_ISL_1300535, EPI_ISL_1300540, EPI_ISL_1300644, EPI_ISL_1300660, EPI_ISL_1300661                                                                                                                                                                                                                                                                                                                                                                                                                                                                                                                                                                                                                                                                                                                                                                                                                                                                                                                                                                                                                                                                                                                                                                                                                                                                                                                                                                               | see above                                                 | Stem Cell Lab, Universitas Pembangunan Nasional Veteran Jakarta (UPNVJ)                                                                                                                                                                                                                                                                                                                                                                                                             | Andri Pramesyanti Pramono; Megadianty Mokoginta; Ria Maria Theresa; Yudhi Nugraha; Yudi Amiarno                                                                                                                                                                                                                                                                                                                                                                                                                                                                                                                                                                                                                               |                                                                                                                                                                                                                                                                                                                                                                                                      |
| EPI_ISL_1297194                                                                                                                                                                                                                                                                                                                                                                                                                                                                                                                                                                                                                                                                                                                                                                                                                                                                                                                                                                                                                                                                                                                                                                                                                                                                                                                                                                                                                                                                                     | RSUD Pasaringgu                                           | Stem Cell Lab, Universitas Pembangunan Nasional Veteran Jakarta (UPNVJ)                                                                                                                                                                                                                                                                                                                                                                                                             | Andri Pramesyanti Pramono; Megadianty Mokoginta; Ria Maria Theresa; Yudhi Nugraha; Yudi Amiarno                                                                                                                                                                                                                                                                                                                                                                                                                                                                                                                                                                                                                               |                                                                                                                                                                                                                                                                                                                                                                                                      |
| EPI_ISL_4004706, EPI_ISL_4004707, EPI_ISL_4004708, EPI_ISL_4004709, EPI_ISL_4004710, EPI_ISL_4004711, EPI_ISL_4004712, EPI_ISL_4004713, EPI_ISL_4004714, EPI_ISL_4004715, EPI_ISL_4004716, EPI_ISL_4004717, EPI_ISL_4004718, EPI_ISL_4106119                                                                                                                                                                                                                                                                                                                                                                                                                                                                                                                                                                                                                                                                                                                                                                                                                                                                                                                                                                                                                                                                                                                                                                                                                                                        | see above                                                 | National Research and Innovation Agency (BRIN-Indonesia, VenomCoV Project Team); West Java Health Laboratory                                                                                                                                                                                                                                                                                                                                                                        | Ahmad Fathoni; Anggia Prasetyoputri; Anik B. Dharmayanthi; Asep M. Ridwanulloh; Azzania Fibriani; Cut Nur Cinthia Alamanda; Ema Rahmawati; Hariyatun; Herjuno Ari Nugroho; Indriawati; Isa Nuryana; Karimatu Khoirunnisa; Karimatu Khoirunnisa Rifki Sadikin; Masrukhin; Miftahul Farid; Puspita Lisdianti; Rath A. Ningrum; Rifki Sadikin; Rifky Waluyajati Rachman; Rini Robiani; Ryan Bayusantika Ristandi; Sugiyono Saputra; Suvia Widyaningrum; Syaiful Rizal; Syam B. Iryanto; rath A. Ningrum                                                                                                                                                                                                                          |                                                                                                                                                                                                                                                                                                                                                                                                      |
| EPI_ISL_568686                                                                                                                                                                                                                                                                                                                                                                                                                                                                                                                                                                                                                                                                                                                                                                                                                                                                                                                                                                                                                                                                                                                                                                                                                                                                                                                                                                                                                                                                                      | RSUD Prof. Dr. Margono Soekarjo                           | Eijkman Institute for Molecular Biology, Ministry of Research and Technology/National Agency for Research and Innovation                                                                                                                                                                                                                                                                                                                                                            | Amin Soebandrio; David H Muljono; Edison Johar; Filasita A Yudhaputri; Herawati Sudoyo; Hidayat Trimarsanto; Iskandar A Adnan; Khin Saw Myint; Safarina G Malik; Willy Agustine                                                                                                                                                                                                                                                                                                                                                                                                                                                                                                                                               |                                                                                                                                                                                                                                                                                                                                                                                                      |
| EPI_ISL_766033                                                                                                                                                                                                                                                                                                                                                                                                                                                                                                                                                                                                                                                                                                                                                                                                                                                                                                                                                                                                                                                                                                                                                                                                                                                                                                                                                                                                                                                                                      | RSUD Prof. Dr. W. Z. Johannes Kumpang                     | Eijkman Institute for Molecular Biology, Ministry of Research and Technology/National Agency for Research and Innovation                                                                                                                                                                                                                                                                                                                                                            | Amin Soebandrio; David H Muljono; Edison Johar; Filasita A Yudhaputri; Hidayat Trimarsanto; Khin Saw Myint; Safarina G Malik                                                                                                                                                                                                                                                                                                                                                                                                                                                                                                                                                                                                  |                                                                                                                                                                                                                                                                                                                                                                                                      |
| EPI_ISL_3216548, EPI_ISL_3216549, EPI_ISL_3216550, EPI_ISL_3216551, EPI_ISL_3216552, EPI_ISL_3216553, EPI_ISL_3216554, EPI_ISL_3691573                                                                                                                                                                                                                                                                                                                                                                                                                                                                                                                                                                                                                                                                                                                                                                                                                                                                                                                                                                                                                                                                                                                                                                                                                                                                                                                                                              | see above                                                 | National Institute of Health Research and Development                                                                                                                                                                                                                                                                                                                                                                                                                               | Arie Ardiansyah Nugraha; Fajar Nur Sulistiyohadi; Hana Apsari Pawestri; Hartanti Dian Ikawati; Kartika Dewi Puspa; Krisna Pangesti; Laily Indrayanti; Nelly Puspandari; Subangkit; Triyani Soekarso; Vivi Setiawaty                                                                                                                                                                                                                                                                                                                                                                                                                                                                                                           |                                                                                                                                                                                                                                                                                                                                                                                                      |
| EPI_ISL_3151602, EPI_ISL_3151607, EPI_ISL_3151614, EPI_ISL_3151621, EPI_ISL_3151628, EPI_ISL_3151634, EPI_ISL_3151641, EPI_ISL_3151642, EPI_ISL_3151647, EPI_ISL_3151648, EPI_ISL_3151653, EPI_ISL_3151654, EPI_ISL_3151659, EPI_ISL_3151660, EPI_ISL_3151667, EPI_ISL_3151668, EPI_ISL_3151674, EPI_ISL_3151675                                                                                                                                                                                                                                                                                                                                                                                                                                                                                                                                                                                                                                                                                                                                                                                                                                                                                                                                                                                                                                                                                                                                                                                    | see above                                                 | National Institute of Health Research and Development                                                                                                                                                                                                                                                                                                                                                                                                                               | Arie Ardiansyah Nugraha; Fajar Nur Sulistiyohadi; Hana Apsari Pawestri; Hartanti Dian Ikawati; Kartika Dewi Puspa; Krisna Pangesti; Nelly Puspandari; Subangkit; Triyani Soekarso; Vivi Setiawaty                                                                                                                                                                                                                                                                                                                                                                                                                                                                                                                             |                                                                                                                                                                                                                                                                                                                                                                                                      |
| EPI_ISL_3070964, EPI_ISL_3070965, EPI_ISL_3070966, EPI_ISL_3070967, EPI_ISL_3070968, EPI_ISL_3070969, EPI_ISL_3070970, EPI_ISL_3070971, EPI_ISL_3070972, EPI_ISL_3070973, EPI_ISL_3070974, EPI_ISL_3070975, EPI_ISL_3070976, EPI_ISL_3070977, EPI_ISL_3070978, EPI_ISL_3070979, EPI_ISL_3070980, EPI_ISL_3070981, EPI_ISL_3070982, EPI_ISL_3070983, EPI_ISL_3070984, EPI_ISL_3070985, EPI_ISL_3070986, EPI_ISL_3070987, EPI_ISL_3070988, EPI_ISL_3070989, EPI_ISL_3070990, EPI_ISL_3070991, EPI_ISL_3070992, EPI_ISL_3070993, EPI_ISL_3070994, EPI_ISL_3070995, EPI_ISL_3070996, EPI_ISL_3070997, EPI_ISL_3070998, EPI_ISL_3070999, EPI_ISL_3071000, EPI_ISL_3071001, EPI_ISL_3071002, EPI_ISL_3071003, EPI_ISL_3071004, EPI_ISL_3071005, EPI_ISL_3071006, EPI_ISL_3071007                                                                                                                                                                                                                                                                                                                                                                                                                                                                                                                                                                                                                                                                                                                          |                                                           |                                                                                                                                                                                                                                                                                                                                                                                                                                                                                     |                                                                                                                                                                                                                                                                                                                                                                                                                                                                                                                                                                                                                                                                                                                               |                                                                                                                                                                                                                                                                                                                                                                                                      |

[illegible]

|                                                                                                                                                                                                                                                                                                                                                                                                                                                                                                                                                                                                                                                                      |                                                     |                                                                                                                                                                                                                                                                                                                                                                                                                                                                                     |                                                                                                                                                                                                                                                                                                                                                                                                                                                                                                                                                                                                                                                           |  |
|----------------------------------------------------------------------------------------------------------------------------------------------------------------------------------------------------------------------------------------------------------------------------------------------------------------------------------------------------------------------------------------------------------------------------------------------------------------------------------------------------------------------------------------------------------------------------------------------------------------------------------------------------------------------|-----------------------------------------------------|-------------------------------------------------------------------------------------------------------------------------------------------------------------------------------------------------------------------------------------------------------------------------------------------------------------------------------------------------------------------------------------------------------------------------------------------------------------------------------------|-----------------------------------------------------------------------------------------------------------------------------------------------------------------------------------------------------------------------------------------------------------------------------------------------------------------------------------------------------------------------------------------------------------------------------------------------------------------------------------------------------------------------------------------------------------------------------------------------------------------------------------------------------------|--|
| EPI_ISL_4254871                                                                                                                                                                                                                                                                                                                                                                                                                                                                                                                                                                                                                                                      |                                                     |                                                                                                                                                                                                                                                                                                                                                                                                                                                                                     |                                                                                                                                                                                                                                                                                                                                                                                                                                                                                                                                                                                                                                                           |  |
| EPI_ISL_3691672, EPI_ISL_3691678, EPI_ISL_3691679, EPI_ISL_3691680                                                                                                                                                                                                                                                                                                                                                                                                                                                                                                                                                                                                   | RSUD dr H Marsidi Judono                            | National Institute of Health Research and Development                                                                                                                                                                                                                                                                                                                                                                                                                               | Arie Ardiansyah Nugraha; Fajar Nur Sulistiyohadi; Hana Apsari Pawestri; Hartanti Dian Ikawati; Kartika Dewi Puspa; Krisna Pangesti; Nelly Puspandari; Subangkit; Triyani Soekarso; Vivi Setiawaty                                                                                                                                                                                                                                                                                                                                                                                                                                                         |  |
| EPI_ISL_2502615                                                                                                                                                                                                                                                                                                                                                                                                                                                                                                                                                                                                                                                      | RSUD dr Loekmono Hadi                               | Genetics Working Group (Pokja Genetik) Faculty of Medicine, Public Health and Nursing Universitas Gadjah Mada (FK-KMK UGM); Disease Investigation Center Wates Ministry of Agriculture Indonesia; Department of Microbiology FK-KMK UGM; Laboratorium Diagnostik Yayasan Tahija World Mosquito Program (WMP) Yogyakarta Center for Tropical Medicine FK-KMK UGM; Integrated Research Center FK-KMK UGM; Department of Computer Science and Electronics FMIPA UGM; RSUP Dr. Sardjito | Afiahayati; Dwi AA Nugrahaningsih; Dwi Indaryati; Dyah A Puspitarani; Edwin W. Daniwijaya; Eggi Arguni; Endah Supriyati; Gunadi; Hendra Wibawa; Indarto Sulistiyono; Kristy Iskandar; Ludhang P. Rizki; Marcellus; Mohamad S. Hakim; Nungki Anggorowati; Pramesti G Dewi; Siswanto; Susan Simanjaya; Titik Nuryastuti; Tri Wibawa                                                                                                                                                                                                                                                                                                                         |  |
| EPI_ISL_4090583                                                                                                                                                                                                                                                                                                                                                                                                                                                                                                                                                                                                                                                      | RSUD dr Sayidiman Magetan                           | National Institute of Health Research and Development                                                                                                                                                                                                                                                                                                                                                                                                                               | Arie Ardiansyah Nugraha; Fajar Nur Sulistiyohadi; Hana Apsari Pawestri; Hartanti Dian Ikawati; Kartika Dewi Puspa; Krisna Pangesti; Nelly Puspandari; Subangkit; Triyani Soekarso; Vivi Setiawaty                                                                                                                                                                                                                                                                                                                                                                                                                                                         |  |
| EPI_ISL_2987625, EPI_ISL_2987626, EPI_ISL_2987627, EPI_ISL_2987628, EPI_ISL_2987629, EPI_ISL_3019946                                                                                                                                                                                                                                                                                                                                                                                                                                                                                                                                                                 | RSUD dr Slamet Garut                                | National Institute of Health Research and Development                                                                                                                                                                                                                                                                                                                                                                                                                               | Arie Ardiansyah Nugraha; Fajar Nur Sulistiyohadi; Hana Apsari Pawestri; Hartanti Dian Ikawati; Kartika Dewi Puspa; Krisna Pangesti; Nelly Puspandari; Subangkit; Triyani Soekarso; Vivi Setiawaty                                                                                                                                                                                                                                                                                                                                                                                                                                                         |  |
| EPI_ISL_2931729, EPI_ISL_2931737, EPI_ISL_2931746, EPI_ISL_2931756, EPI_ISL_2931757, EPI_ISL_2931765, EPI_ISL_2931766, EPI_ISL_2931776, EPI_ISL_2931783, EPI_ISL_2931791                                                                                                                                                                                                                                                                                                                                                                                                                                                                                             |                                                     |                                                                                                                                                                                                                                                                                                                                                                                                                                                                                     |                                                                                                                                                                                                                                                                                                                                                                                                                                                                                                                                                                                                                                                           |  |
| see above                                                                                                                                                                                                                                                                                                                                                                                                                                                                                                                                                                                                                                                            | RSUD dr Soediran Mangun Sumarso, Wonogiri           | National Institute of Health Research and Development                                                                                                                                                                                                                                                                                                                                                                                                                               | ; Arie Ardiansyah Nugraha; Hana Apsari Pawestri; Hartanti Dian Ikawati; Kartika Dewi Puspa; Krisna Pangesti; Nelly Puspandari; Subangkit; Triyani Soekarso; Vivi Setiawaty                                                                                                                                                                                                                                                                                                                                                                                                                                                                                |  |
| EPI_ISL_3216524, EPI_ISL_3216525, EPI_ISL_3216526, EPI_ISL_3216527, EPI_ISL_3216528, EPI_ISL_3216529, EPI_ISL_3216530, EPI_ISL_3216531, EPI_ISL_3278293                                                                                                                                                                                                                                                                                                                                                                                                                                                                                                              | RSUD dr Soehadi Prijonegoro Sragen                  | National Institute of Health Research and Development                                                                                                                                                                                                                                                                                                                                                                                                                               | Arie Ardiansyah Nugraha; Fajar Nur Sulistiyohadi; Hana Apsari Pawestri; Hartanti Dian Ikawati; Kartika Dewi Puspa; Krisna Pangesti; Nelly Puspandari; Subangkit; Triyani Soekarso; Vivi Setiawaty                                                                                                                                                                                                                                                                                                                                                                                                                                                         |  |
| EPI_ISL_2258207, EPI_ISL_2262276, EPI_ISL_2262277                                                                                                                                                                                                                                                                                                                                                                                                                                                                                                                                                                                                                    | RSUD dr Soetomo Surabaya                            | National Institute of Health Research and Development                                                                                                                                                                                                                                                                                                                                                                                                                               | Arie Ardiansyah Nugraha; Hana Apsari Pawestri; Hartanti Dian Ikawati; Kartika Dewi Puspa; Krisna Pangesti; Nelly Puspandari; Subangkit; Triyani Soekarso; Vivi Setiawaty                                                                                                                                                                                                                                                                                                                                                                                                                                                                                  |  |
| EPI_ISL_4730582, EPI_ISL_4730583, EPI_ISL_4730584, EPI_ISL_4730585, EPI_ISL_4736609, EPI_ISL_5022708, EPI_ISL_5022709, EPI_ISL_5022710, EPI_ISL_5022711, EPI_ISL_5022712, EPI_ISL_5022713, EPI_ISL_5022714, EPI_ISL_5022715, EPI_ISL_5022716, EPI_ISL_5022717, EPI_ISL_5022718, EPI_ISL_5022719, EPI_ISL_5022720                                                                                                                                                                                                                                                                                                                                                     |                                                     |                                                                                                                                                                                                                                                                                                                                                                                                                                                                                     |                                                                                                                                                                                                                                                                                                                                                                                                                                                                                                                                                                                                                                                           |  |
| see above                                                                                                                                                                                                                                                                                                                                                                                                                                                                                                                                                                                                                                                            | RSUD dr. H. Ansari Saleh Banjarmasin                | National Institute of Health Research and Development                                                                                                                                                                                                                                                                                                                                                                                                                               | Arie Ardiansyah Nugraha; Fajar Nur Sulistiyohadi; Hana Apsari Pawestri; Hartanti Dian Ikawati; Kartika Dewi Puspa; Krisna Pangesti; Nelly Puspandari; Subangkit; Triyani Soekarso; Vivi Setiawaty                                                                                                                                                                                                                                                                                                                                                                                                                                                         |  |
| EPI_ISL_3404368, EPI_ISL_3404369, EPI_ISL_3404371, EPI_ISL_3404372                                                                                                                                                                                                                                                                                                                                                                                                                                                                                                                                                                                                   | RSUD dr. H. Marsidi Judono Belitung                 | Genomik Solidaritas Indonesia Laboratorium                                                                                                                                                                                                                                                                                                                                                                                                                                          | Annisa Muthiah Sukirman; Anuraj Shankar; Ariel Pradipta; Carissa Sintca Wijaya; Dhahlia Agustina Cahyono; Gracia Felias Enos Korompis; Louisa Markus; Meutia Ayuputeri Kumaheri; Neng Hilma Hamidah; Teguh A.Maulana Gultom; Titik Handayani Tanujaya; Vania Gavriila Wikasa                                                                                                                                                                                                                                                                                                                                                                              |  |
| EPI_ISL_3404370                                                                                                                                                                                                                                                                                                                                                                                                                                                                                                                                                                                                                                                      | RSUD dr. H. Marsidi Judono, Belitung                | Genomik Solidaritas Indonesia Laboratorium                                                                                                                                                                                                                                                                                                                                                                                                                                          | Annisa Muthiah Sukirman; Anuraj Shankar; Ariel Pradipta; Carissa Sintca Wijaya; Dhahlia Agustina Cahyono; Gracia Felias Enos Korompis; Louisa Markus; Meutia Ayuputeri Kumaheri; Neng Hilma Hamidah; Teguh A.Maulana Gultom; Titik Handayani Tanujaya; Vania Gavriila Wikasa                                                                                                                                                                                                                                                                                                                                                                              |  |
| EPI_ISL_4030488                                                                                                                                                                                                                                                                                                                                                                                                                                                                                                                                                                                                                                                      | RSUD dr. H.Marsidi Judono                           | Genomik Solidaritas Indonesia Laboratorium                                                                                                                                                                                                                                                                                                                                                                                                                                          | Annisa Muthiah Sukirman; Anuraj Shankar; Ariel Pradipta; Carissa Sintca Wijaya; David Hendra Haryanto; Dhahlia Agustina Cahyono; Dwi Oktavia; Gracia Felias Enos Korompis; Hendra; Himawan Masyhuri; Louisa Markus; Meutia Ayuputeri Kumaheri; Neng Hilma Hamidah; Ngabila Salama; R. Anggi Wahyu Nugroho; Tiranti Vindha; Titik Handayani Tanujaya                                                                                                                                                                                                                                                                                                       |  |
| EPI_ISL_1824615                                                                                                                                                                                                                                                                                                                                                                                                                                                                                                                                                                                                                                                      | RSUD dr. Hasri Ainun Habibie Gorontalo              | National Institute of Health Research and Development                                                                                                                                                                                                                                                                                                                                                                                                                               | Arie Ardiansyah Nugraha; Hana Apsari Pawestri; Hartanti Dian Ikawati; Kartika Dewi Puspa; Krisna Pangesti; Nelly Puspandari; Subangkit; Vivi Setiawaty                                                                                                                                                                                                                                                                                                                                                                                                                                                                                                    |  |
| EPI_ISL_791983                                                                                                                                                                                                                                                                                                                                                                                                                                                                                                                                                                                                                                                       | RSUD dr. Kanujoso Djatiwibowo Balikpapan            | National Institute of Health Research and Development                                                                                                                                                                                                                                                                                                                                                                                                                               | AA; HA; HD; Ikawati; Ivanna; KD; KNA; N; Nugraha; Pangesti; Pawestri; Puspa; Puspandari; Setiawaty; Soekarso; Subangkit; T; V                                                                                                                                                                                                                                                                                                                                                                                                                                                                                                                             |  |
| EPI_ISL_2502616, EPI_ISL_2502627, EPI_ISL_2502628, EPI_ISL_2502629, EPI_ISL_2502667, EPI_ISL_2502687, EPI_ISL_2502717, EPI_ISL_2502763, EPI_ISL_2502764, EPI_ISL_2502765, EPI_ISL_2503134, EPI_ISL_2506037, EPI_ISL_2506038, EPI_ISL_2506039, EPI_ISL_2506040, EPI_ISL_2506041, EPI_ISL_2506042, EPI_ISL_2534078, EPI_ISL_2534079, EPI_ISL_2534082, EPI_ISL_2534289, EPI_ISL_2534338, EPI_ISL_2534339, EPI_ISL_2534346, EPI_ISL_2534376, EPI_ISL_2534377, EPI_ISL_2534378, EPI_ISL_2534379, EPI_ISL_2534454, EPI_ISL_2534455, EPI_ISL_2534456, EPI_ISL_2534457, EPI_ISL_2534458, EPI_ISL_2534489, EPI_ISL_2534490, EPI_ISL_2534518                                   | RSUD dr. LOEKMONO HADI                              | Genetics Working Group (Pokja Genetik) Faculty of Medicine, Public Health and Nursing Universitas Gadjah Mada (FK-KMK UGM); Disease Investigation Center Wates Ministry of Agriculture Indonesia; Department of Microbiology FK-KMK UGM; Laboratorium Diagnostik Yayasan Tahija World Mosquito Program (WMP) Yogyakarta Center for Tropical Medicine FK-KMK UGM; Integrated Research Center FK-KMK UGM; Department of Computer Science and Electronics FMIPA UGM; RSUP Dr. Sardjito | Afiahayati; Alvina A Setiawan; Cita S Amalia; Dwi AA Nugrahaningsih; Dwi Indaryati; Dyah A Puspitarani; Edwin W. Daniwijaya; Eggi Arguni; Endah Supriyati; Gunadi; Hana F Hanifin; Hendra Wibawa; Indarto Sulistiyono; Irene Tania; Khanza a Vujira; Kristy Iskandar; Ludhang P. Rizki; Marcellus; Mohamad S. Hakim; Nungki Anggorowati; Pramesti G Dewi; Siswanto; Susan Simanjaya; Titik Nuryastuti; Tri Wibawa                                                                                                                                                                                                                                         |  |
| EPI_ISL_791987                                                                                                                                                                                                                                                                                                                                                                                                                                                                                                                                                                                                                                                       | RSUD dr. Loekmono Hadi Kudus                        | National Institute of Health Research and Development                                                                                                                                                                                                                                                                                                                                                                                                                               | AA; HA; HD; Ikawati; KD; KNA; Khoiriyah; N; Nugraha; Pangesti; Pawestri; Puspa; Puspandari; S; Setiawaty; Soekarso; Subangkit; T; V                                                                                                                                                                                                                                                                                                                                                                                                                                                                                                                       |  |
| EPI_ISL_3279412                                                                                                                                                                                                                                                                                                                                                                                                                                                                                                                                                                                                                                                      | RSUD dr. Mohammad Zyn Sampang                       | Institute of Tropical Disease, Universitas Airlangga                                                                                                                                                                                                                                                                                                                                                                                                                                | Agus Akhmadi; Aldise M Nastri; Gatot Soegiarto; Jezzy R Dewantari; Kazufumi Shimizu; Krisnoadi Rahardjo; Laksmi Wulandari; Maria I Lusida; Resti Yudhawati; Rima R Prasetya; Soetjipto; Yasuko Mori                                                                                                                                                                                                                                                                                                                                                                                                                                                       |  |
| EPI_ISL_3279413                                                                                                                                                                                                                                                                                                                                                                                                                                                                                                                                                                                                                                                      | RSUD dr. Soedarsono                                 | Institute of Tropical Disease, Universitas Airlangga                                                                                                                                                                                                                                                                                                                                                                                                                                | Aldise M Nastri; Gatot Soegiarto; Jezzy R Dewantari; Kazufumi Shimizu; Krisnoadi Rahardjo; Laksmi Wulandari; M Burhan; Maria I Lusida; Resti Yudhawati; Rima R Prasetya; Soetjipto; Yasuko Mori                                                                                                                                                                                                                                                                                                                                                                                                                                                           |  |
| EPI_ISL_3267187                                                                                                                                                                                                                                                                                                                                                                                                                                                                                                                                                                                                                                                      | RSUD dr. Soegiri Lamongan                           | Institute of Tropical Disease, Universitas Airlangga                                                                                                                                                                                                                                                                                                                                                                                                                                | Aldise M Nastri; Gatot Soegiarto; Jezzy R Dewantari; Kazufumi Shimizu; Krisnoadi Rahardjo; Laksmi Wulandari; M Chaidir Annas; Maria I Lusida; Resti Yudhawati; Rima R Prasetya; Soetjipto; Yasuko Mori                                                                                                                                                                                                                                                                                                                                                                                                                                                    |  |
| EPI_ISL_2854711                                                                                                                                                                                                                                                                                                                                                                                                                                                                                                                                                                                                                                                      | RSUD dr. Zaenael Abidin                             | National Institute of Health Research and Development                                                                                                                                                                                                                                                                                                                                                                                                                               | ; Arie Ardiansyah Nugraha; Hana Apsari Pawestri; Hartanti Dian Ikawati; Kartika Dewi Puspa; Krisna Pangesti; Nelly Puspandari; Subangkit; Triyani Soekarso; Vivi Setiawaty                                                                                                                                                                                                                                                                                                                                                                                                                                                                                |  |
| EPI_ISL_4030486, EPI_ISL_4030487                                                                                                                                                                                                                                                                                                                                                                                                                                                                                                                                                                                                                                     | RSUD dr.H.Marsidi Judono                            | Genomik Solidaritas Indonesia Laboratorium                                                                                                                                                                                                                                                                                                                                                                                                                                          | Annisa Muthiah Sukirman; Anuraj Shankar; Ariel Pradipta; Carissa Sintca Wijaya; David Hendra Haryanto; Dhahlia Agustina Cahyono; Dwi Oktavia; Gracia Felias Enos Korompis; Hendra; Himawan Masyhuri; Louisa Markus; Meutia Ayuputeri Kumaheri; Neng Hilma Hamidah; Ngabila Salama; R. Anggi Wahyu Nugroho; Tiranti Vindha; Titik Handayani Tanujaya                                                                                                                                                                                                                                                                                                       |  |
| EPI_ISL_4761496                                                                                                                                                                                                                                                                                                                                                                                                                                                                                                                                                                                                                                                      | RSUD. Dr. R Soedjati Purwodadi Grobogan             | Balai Laboratorium Kesehatan Dan Pengujian Alat Kesehatan Provinsi Jawa Tengah                                                                                                                                                                                                                                                                                                                                                                                                      | Alia Wijayanti; Dwi Nursetyaaasih; Dyah Ayu; Endah Wahyu Y; Ismi Farhati; Purnomo; Sekti Handayani; Wiwik Peni; Yekti Hediningsih                                                                                                                                                                                                                                                                                                                                                                                                                                                                                                                         |  |
| EPI_ISL_5616355, EPI_ISL_5616421                                                                                                                                                                                                                                                                                                                                                                                                                                                                                                                                                                                                                                     | RSUD. Dr. R Soedjati Purwodadi Grobogan             | Balai Laboratorium Kesehatan dan Pengujian Alat Kesehatan Provinsi Jawa Tengah                                                                                                                                                                                                                                                                                                                                                                                                      | Alia Wijayanti; Dwi Nursetyaaasih; Dyah Ayu; Endah Wahyu Y; Ismi Farhati; Purnomo; Sekti Handayani; Wiwik Peni; Yekti Hediningsih                                                                                                                                                                                                                                                                                                                                                                                                                                                                                                                         |  |
| EPI_ISL_1257865, EPI_ISL_1257866                                                                                                                                                                                                                                                                                                                                                                                                                                                                                                                                                                                                                                     | RSUP Adam Malik                                     | National Institute of Health Research and Development                                                                                                                                                                                                                                                                                                                                                                                                                               | Ade Rahmaini; Arie Ardiansyah Nugraha; Hana Apsari Pawestri; Hartanti Dian Ikawati; Kartika Dewi Puspa; Krisna Pangesti; Maliana; Nelly Elfrida Samosir; Nelly Puspandari; Rina Yunita; Subangkit; Vivi Setiawaty                                                                                                                                                                                                                                                                                                                                                                                                                                         |  |
| EPI_ISL_1169049                                                                                                                                                                                                                                                                                                                                                                                                                                                                                                                                                                                                                                                      | RSUP Adam Malik Medan Sumatera Utara                | National Institute of Health Research and Development                                                                                                                                                                                                                                                                                                                                                                                                                               | Arie Ardiansyah Nugraha; Hana Apsari Pawestri; Hartanti Dian Ikawati; Kartika Dewi Puspa; Nelly Puspandari; Subangkit; Vivi Setiawaty                                                                                                                                                                                                                                                                                                                                                                                                                                                                                                                     |  |
| EPI_ISL_791982                                                                                                                                                                                                                                                                                                                                                                                                                                                                                                                                                                                                                                                       | RSUP DR KARIADI Semarang                            | National Institute of Health Research and Development                                                                                                                                                                                                                                                                                                                                                                                                                               | AA; HA; HD; I; Ikawati; KD; KNA; N; Nugraha; Pangesti; Pawestri; Puspa; Puspandari; Puspitasari; Setiawaty; Soekarso; Subangkit; T; V                                                                                                                                                                                                                                                                                                                                                                                                                                                                                                                     |  |
| EPI_ISL_1257823, EPI_ISL_1257824, EPI_ISL_1257825, EPI_ISL_1257826, EPI_ISL_2854667, EPI_ISL_2854668, EPI_ISL_2854669, EPI_ISL_2854670, EPI_ISL_2854671, EPI_ISL_2854672                                                                                                                                                                                                                                                                                                                                                                                                                                                                                             | RSUP DR Mohammad Hoesin                             | National Institute of Health Research and Development                                                                                                                                                                                                                                                                                                                                                                                                                               | Arie Ardiansyah Nugraha; Eny Rahmawati; Hana Apsari Pawestri; Hartanti Dian Ikawati; Kartika Dewi Puspa; Krisna Pangesti; Nelly Puspandari; Rogaya; Subangkit; Triyani Soekarso; Vivi Setiawaty                                                                                                                                                                                                                                                                                                                                                                                                                                                           |  |
| EPI_ISL_2338534                                                                                                                                                                                                                                                                                                                                                                                                                                                                                                                                                                                                                                                      | RSUP DR SARDJITO                                    | Genetics Working Group (Pokja Genetik) Faculty of Medicine, Public Health and Nursing Universitas Gadjah Mada (FK-KMK UGM); Disease Investigation Center Wates Ministry of Agriculture Indonesia; Department of Microbiology FK-KMK UGM; Laboratorium Diagnostik Yayasan Tahija World Mosquito Program (WMP) Yogyakarta Center for Tropical Medicine FK-KMK UGM; Integrated Research Center FK-KMK UGM; Department of Computer Science and Electronics FMIPA UGM; RSUP Dr. Sardjito | . Marcellus; Afiahayati; Bambang Sigit Riyanto; Dwi AA Nugrahaningsih; Dyah A Puspitarani; Edwin W. Daniwijaya; Eggi Arguni; Eko Budiono; Endah Supriyati; Gunadi; Hendra Wibawa; Heni Retnowulan; Ika Trisnawati; Ira Puspitawati; Kristy Iskandar; Ludhang P. Rizki; Mohamad S. Hakim; Munawar Gani; Nungki Anggorowati; Nur Imma Fatimah Harahap; Nur Rahmi Ananda; Osman Sianipar; Riat El Khair; Satria Maulana; Siswanto; Sumardi; Titik Nuryastuti; Tri Wibawa; Umi Solekhah Intansari; Untung Riawan; Yunka Puspadewi; Elizabeth Henny Herringtiyas                                                                                               |  |
| EPI_ISL_3138918, EPI_ISL_3138919, EPI_ISL_3138920, EPI_ISL_3138921, EPI_ISL_3138922, EPI_ISL_3138923, EPI_ISL_3138924, EPI_ISL_3138925, EPI_ISL_3138926                                                                                                                                                                                                                                                                                                                                                                                                                                                                                                              | RSUP Dr Kariadi Semarang                            | National Institute of Health Research and Development                                                                                                                                                                                                                                                                                                                                                                                                                               | Arie Ardiansyah Nugraha; Fajar Nur Sulistiyohadi; Hana Apsari Pawestri; Hartanti Dian Ikawati; Kartika Dewi Puspa; Krisna Pangesti; Nelly Puspandari; Subangkit; Triyani Soekarso; Vivi Setiawaty                                                                                                                                                                                                                                                                                                                                                                                                                                                         |  |
| EPI_ISL_576115                                                                                                                                                                                                                                                                                                                                                                                                                                                                                                                                                                                                                                                       | RSUP Dr Sardjito                                    | Genetics Working Group (Pokja Genetik) Faculty of Medicine, Public Health and Nursing Universitas Gadjah Mada (FK-KMK UGM); Disease Investigation Center Wates Ministry of Agriculture Indonesia; Department of Microbiology FK-KMK UGM; Laboratorium Diagnostik Yayasan Tahija World Mosquito Program (WMP) Yogyakarta Center for Tropical Medicine FK-KMK UGM; Integrated Research Center FK-KMK UGM; Department of Computer Science and Electronics FMIPA UGM                    | . Marcellus; Afiahayati; Dwi AA Nugrahaningsih; Edwin W. Daniwijaya; Eggi Arguni; Endah Supriyati; Gunadi; Hendra Wibawa; Ika Trisnawati; Ira Puspitawati; Kristy Iskandar; Ludhang P. Rizki; Maria Patricia Inggrani; Mohamad S. Hakim; Nungki Anggorowati; Nur Imma Fatimah Harahap; Osman Sianipar; Riat El Khair; Siswanto; Titik Nuryastuti; Tri Wibawa; Umi Solekhah Intansari; Untung Wirawan; Yunka Puspadewi; Elizabeth Henny Herringtiyas                                                                                                                                                                                                       |  |
| EPI_ISL_2955607, EPI_ISL_3417523, EPI_ISL_3417524, EPI_ISL_4969112                                                                                                                                                                                                                                                                                                                                                                                                                                                                                                                                                                                                   | RSUP Dr Sardjito                                    | Genetics Working Group (Pokja Genetik) Faculty of Medicine, Public Health and Nursing Universitas Gadjah Mada (FK-KMK UGM); Disease Investigation Center Wates Ministry of Agriculture Indonesia; Department of Microbiology FK-KMK UGM; Laboratorium Diagnostik Yayasan Tahija World Mosquito Program (WMP) Yogyakarta Center for Tropical Medicine FK-KMK UGM; Integrated Research Center FK-KMK UGM; Department of Computer Science and Electronics FMIPA UGM; RSUP Dr. Sardjito | . Marcellus; Afiahayati; Alvina A Setiawan; Bambang Sigit Riyanto; Dwi AA Nugrahaningsih; Dwi Indaryati; Edwin W. Daniwijaya; Eggi Arguni; Eko Budiono; Endah Supriyati; Gunadi; Hana F Hanifin; Hendra Wibawa; Heni Retnowulan; Ika Trisnawati; Indarto Sulistiyono; Ira Puspitawati; Irene Tania; Khanza a Vujira; Kristy Iskandar; Ludhang P. Rizki; Marcellus; Mohamad S. Hakim; Munawar Gani; Nungki Anggorowati; Nur Imma Fatimah Harahap; Nur Rahmi Ananda; Osman Sianipar; Pramesti G Dewi; Riat El Khair; Satria Maulana; Siswanto; Sumardi; Titik Nuryastuti; Tri Wibawa; Umi Solekhah Intansari; Yunka Puspadewi; Elizabeth Henny Herringtiyas |  |
| EPI_ISL_1169047                                                                                                                                                                                                                                                                                                                                                                                                                                                                                                                                                                                                                                                      | RSUP Dr. Mohammad Hoesin Palembang Sumatera Selatan | National Institute of Health Research and Development                                                                                                                                                                                                                                                                                                                                                                                                                               | Arie Ardiansyah Nugraha; Hana Apsari Pawestri; Hartanti Dian Ikawati; Kartika Dewi Puspa; Nelly Puspandari; Subangkit; Vivi Setiawaty                                                                                                                                                                                                                                                                                                                                                                                                                                                                                                                     |  |
| EPI_ISL_2824988, EPI_ISL_2824989, EPI_ISL_2824990, EPI_ISL_2824991, EPI_ISL_2824992, EPI_ISL_2824993, EPI_ISL_2824994, EPI_ISL_2824995, EPI_ISL_2824996, EPI_ISL_2824997, EPI_ISL_2824998, EPI_ISL_2824999, EPI_ISL_2825000, EPI_ISL_2825001, EPI_ISL_2825002, EPI_ISL_2825003, EPI_ISL_2825004, EPI_ISL_2825005, EPI_ISL_2825006, EPI_ISL_2825007, EPI_ISL_2825008, EPI_ISL_2825009, EPI_ISL_2825010, EPI_ISL_2825011, EPI_ISL_2825012, EPI_ISL_2825013, EPI_ISL_2825014, EPI_ISL_2825015, EPI_ISL_2825016, EPI_ISL_2825017, EPI_ISL_2825018, EPI_ISL_2825019, EPI_ISL_2825020, EPI_ISL_2825021, EPI_ISL_2825022, EPI_ISL_3418699, EPI_ISL_3418666, EPI_ISL_3419363 | RSUP Dr. Hasan Sadikin Bandung                      | Genomik Solidaritas Indonesia Laboratorium                                                                                                                                                                                                                                                                                                                                                                                                                                          | Alfin Mohammad Abdillah; Anna Christina Brazila; Annisa Muthiah Sukirman; Anuraj Shankar; Basti Andriyoko; Carissa Sintca Wijaya; Delita Prihatni; Dewi Kartika Turbawati; Dhahlia Agustina Cahyono; Gracia Felias Enos Korompis; Louisa Markus; Meutia Ayuputeri Kumaheri; Normastuti Adhini Tantyo; Reinhart Gabriel; Vania Gavriila Wikasa; Vivi Setyawati                                                                                                                                                                                                                                                                                             |  |

|                                                                                                                                                                                                                                                                                                                                                                                                                                                                                                                                                                                                                                                                                                                                                                                                                                                                                                                                                      |                                                                                 |                                                                                                                                                                                                                                                                                                                                                                                                                                                                                     |                                                                                                                                                                                                                                                                                                                                                                                                                                                                                                                                                                                                                                                                                                                                                                                                                                         |
|------------------------------------------------------------------------------------------------------------------------------------------------------------------------------------------------------------------------------------------------------------------------------------------------------------------------------------------------------------------------------------------------------------------------------------------------------------------------------------------------------------------------------------------------------------------------------------------------------------------------------------------------------------------------------------------------------------------------------------------------------------------------------------------------------------------------------------------------------------------------------------------------------------------------------------------------------|---------------------------------------------------------------------------------|-------------------------------------------------------------------------------------------------------------------------------------------------------------------------------------------------------------------------------------------------------------------------------------------------------------------------------------------------------------------------------------------------------------------------------------------------------------------------------------|-----------------------------------------------------------------------------------------------------------------------------------------------------------------------------------------------------------------------------------------------------------------------------------------------------------------------------------------------------------------------------------------------------------------------------------------------------------------------------------------------------------------------------------------------------------------------------------------------------------------------------------------------------------------------------------------------------------------------------------------------------------------------------------------------------------------------------------------|
| EPI_ISL_2854720, EPI_ISL_2854721, EPI_ISL_2854722                                                                                                                                                                                                                                                                                                                                                                                                                                                                                                                                                                                                                                                                                                                                                                                                                                                                                                    | RSUP Dr. Hasan Sadikin Bandung                                                  | National Institute of Health Research and Development                                                                                                                                                                                                                                                                                                                                                                                                                               | ; Arie Ardiansyah Nugraha; Hana Apsari Pawestri; Hartanti Dian Ikawati; Kartika Dewi Puspa; Krisna Pangesti; Nelly Puspandari; Subangkit; Triyani Soekarso; Vivi Setiawaty                                                                                                                                                                                                                                                                                                                                                                                                                                                                                                                                                                                                                                                              |
| EPI_ISL_2918614, EPI_ISL_2918615, EPI_ISL_2918616, EPI_ISL_2918617, EPI_ISL_2918618, EPI_ISL_2918619, EPI_ISL_2918620, EPI_ISL_2918621, EPI_ISL_2918622, EPI_ISL_2918623, EPI_ISL_2918626, EPI_ISL_2918626, EPI_ISL_3029905, EPI_ISL_3029906, EPI_ISL_3029907, EPI_ISL_3029908, EPI_ISL_3029909, EPI_ISL_3029910, EPI_ISL_3029911, EPI_ISL_3029912, EPI_ISL_3029913, EPI_ISL_3029915, EPI_ISL_3029916, EPI_ISL_3029917, EPI_ISL_3029918, EPI_ISL_3029919, EPI_ISL_3029920, EPI_ISL_3029921, EPI_ISL_3029922, EPI_ISL_3029923, EPI_ISL_3029924, EPI_ISL_3029925, EPI_ISL_3029927, EPI_ISL_3029928, EPI_ISL_3029929, EPI_ISL_3029930, EPI_ISL_3070856, EPI_ISL_3070857                                                                                                                                                                                                                                                                                 | see above<br>RSUP Dr. Kariadi<br>EPI_ISL_766032                                 | Eijkman Institute for Molecular Biology, National Research and Innovation Agency<br>Eijkman Institute for Molecular Biology, Ministry of Research and Technology/National Agency for Research and Innovation                                                                                                                                                                                                                                                                        | Amin Soebandrio; Edison Johar; Frilasita A Yudhaputri; Hidayat Trimarsanto; Iskandar Adnan; Khin Saw Myint; Lidwina Priliani; Lydia V. Panggalo; Muhammad Rezki Rasyak; Safarina G Malik; Sukma Oktavianthi; Willy Agustine<br>Amin Soebandrio; David H Muljono; Edison Johar; Frilasita A Yudhaputri; Hidayat Trimarsanto; Khin Saw Myint; Safarina G Malik                                                                                                                                                                                                                                                                                                                                                                                                                                                                            |
| EPI_ISL_2943173                                                                                                                                                                                                                                                                                                                                                                                                                                                                                                                                                                                                                                                                                                                                                                                                                                                                                                                                      | RSUP Dr. Sardjito                                                               | Genetics Working Group (Pokja Genetik) Faculty of Medicine, Public Health and Nursing Universitas Gadjah Mada (FK-KMK UGM); Disease Investigation Center Wates Ministry of Agriculture Indonesia; Department of Microbiology FK-KMK UGM; Laboratorium Diagnostik Yayasan Tahija World Mosquito Program                                                                                                                                                                              | Marcellus; Afiahayati; Bambang Sigit Riyanto; Dwi AA Nugrahainingsih; Edwin W. Daniwijaya; Eggi Arguni; Eko Budiono; Endah Supriyati; Gunadi; Hana F Hanifin; Hendra Wibawa; Heni Retnowulan; Ika Trisnawati; Ira Puspitawati; Irene Tania; Kristy Iskandar; Ludhang P. Rizki; Mohamad S. Hakim; Munawar Gani; Nungki Anggorowati; Nur Imma Fatimah Harahap; Nur Rahmi Ananda; Osman Sianipar; Riat El Khair; Satria Maulana; Siswanto; Sumardi; Titik Nuryastuti; Tri Wibawa; Umi Solekhah Intansari; Yunka Puspadewi; Elizabeth Henny Herningtiyas                                                                                                                                                                                                                                                                                    |
| EPI_ISL_576113, EPI_ISL_576114, EPI_ISL_576116, EPI_ISL_576128, EPI_ISL_576130                                                                                                                                                                                                                                                                                                                                                                                                                                                                                                                                                                                                                                                                                                                                                                                                                                                                       | RSUP Dr. Sardjito                                                               | Genetics Working Group (Pokja Genetik) Faculty of Medicine, Public Health and Nursing Universitas Gadjah Mada (FK-KMK UGM); Disease Investigation Center Wates Ministry of Agriculture Indonesia; Department of Microbiology FK-KMK UGM; Laboratorium Diagnostik Yayasan Tahija World Mosquito Program (WMP) Yogyakarta Center for Tropical Medicine FK-KMK UGM; Integrated Research Center FK-KMK UGM; Department of Computer Science and Electronics FMIPA UGM                    | . Marcellus; Aditya Rifqi Fauzi; Afiahayati; Alvin S. Kalim; Alvin Santoso Kalim; Amalia Setyati; Audric Kenny Tedja; Bambang Sigit Riyanto; Cahya Dewi Satria; Desyifa Mursalin; Dwi AA Nugrahainingsih; Dwikisworo Setyowireni; Dyah Ayu Puspitarani; Edwin W. Daniwijaya; Eggi Arguni; Eko Budiono; Elisabeth Siti Herini; Endah Supriyati; Fadil Fahri; Gunadi; Hendra Wibawa; Heni Retnowulan; Ida Safitri Laksanawati; Ika Trisnawati; Ira Puspitawati; Kemala Athollah; Kristy Iskandar; Ludhang P. Rizki; Marcellus; Mohamad S. Hakim; Munawar Gani; Nungki Anggorowati; Nur Imma Fatimah Harahap; Nur Rahmi Ananda; Osman Sianipar; Riat El Khair; Satria Maulana; Siswanto; Sumardi; Susan Simanjaya; Titik Nuryastuti; Tri Wibawa; Umi Solekhah Intansari; William Widitjarso; Yunka Puspadewi; Elizabeth Henny Herningtiyas |
| EPI_ISL_862039, EPI_ISL_862040, EPI_ISL_862041, EPI_ISL_872188, EPI_ISL_872189, EPI_ISL_872190, EPI_ISL_885142, EPI_ISL_2601039                                                                                                                                                                                                                                                                                                                                                                                                                                                                                                                                                                                                                                                                                                                                                                                                                      | see above<br>RSUP Dr. Sardjito                                                  | Genetics Working Group (Pokja Genetik) Faculty of Medicine, Public Health and Nursing Universitas Gadjah Mada (FK-KMK UGM); Disease Investigation Center Wates Ministry of Agriculture Indonesia; Department of Microbiology FK-KMK UGM; Laboratorium Diagnostik Yayasan Tahija World Mosquito Program (WMP) Yogyakarta Center for Tropical Medicine FK-KMK UGM; Integrated Research Center FK-KMK UGM; Department of Computer Science and Electronics FMIPA UGM; RSUP Dr. Sardjito | . Marcellus; Aditya Rifqi Fauzi; Afiahayati; Alvin S. Kalim; Alvin Santoso Kalim; Audric Kenny Tedja; Bambang Sigit Riyanto; Dwi AA Nugrahainingsih; Dwiki afandy; Dyah Ayu Puspitarani; Edwin W. Daniwijaya; Eggi Arguni; Eko Budiono; Endah Supriyati; Fadil Fahri; Gunadi; Hana F Hanifin; Hendra Wibawa; Heni Retnowulan; Ika Trisnawati; Ira Puspitawati; Irene Tania; Kemala Athollah; Kristy Iskandar; Ludhang P. Rizki; Maria Patricia Inggriani; Mohamad S. Hakim; Munawar Gani; Nungki Anggorowati; Nur Imma Fatimah Harahap; Nur Rahmi Ananda; Osman Sianipar; Riat El Khair; Satria Maulana; Siswanto; Sumardi; Susan Simanjaya; Titik Nuryastuti; Tri Wibawa; Umi Solekhah Intansari; Untung Riawan; William Widitjarso; Yunka Puspadewi; Elizabeth Henny Herningtiyas                                                     |
| EPI_ISL_1257827, EPI_ISL_1257828, EPI_ISL_1257829, EPI_ISL_1257863                                                                                                                                                                                                                                                                                                                                                                                                                                                                                                                                                                                                                                                                                                                                                                                                                                                                                   | RSUP Dr. Sardjito                                                               | National Institute of Health Research and Development                                                                                                                                                                                                                                                                                                                                                                                                                               | Arie Ardiansyah Nugraha; Hana Apsari Pawestri; Hartanti Dian Ikawati; Kartika Dewi Puspa; Krisna Pangesti; Nelly Puspandari; Subangkit; Vivi Setiawaty                                                                                                                                                                                                                                                                                                                                                                                                                                                                                                                                                                                                                                                                                  |
| EPI_ISL_3216515, EPI_ISL_3216516, EPI_ISL_3216517, EPI_ISL_3216518, EPI_ISL_3216519, EPI_ISL_3216521, EPI_ISL_3230238, EPI_ISL_3230239, EPI_ISL_3230240, EPI_ISL_3230241, EPI_ISL_3230242, EPI_ISL_3230243, EPI_ISL_3230247                                                                                                                                                                                                                                                                                                                                                                                                                                                                                                                                                                                                                                                                                                                          | see above<br>RSUP FATMAWATI / DINAS KESEHATAN DKI JAKARTA                       | Genomik Solidaritas Indonesia Laboratorium                                                                                                                                                                                                                                                                                                                                                                                                                                          | Alfin Mohammad Abdillah; Anna Christina Brazia; Annisa Muthiah Sukirman; Anuraj Shankar; Ariel Pradipta; Carissa Sintca Wijaya; Dhahlia Agustina Cahyono; Gracia Felias Enos Korompis; Hartini Cahyadi; Himawan Masyhuri; Irwan Idris; Jerry; Leonardo H Simanjuntak; Lidya Utami; Loli Simanjuntak; Meutia Ayputeri Kumaheri; Neng Hilma Hamidah; Normastuti Adhini Tanty; Reinhart Gabriel; Vania Gavriila Wikasa<br>Amin Soebandrio; David H Muljono; Edison Johar; Frilasita A Yudhaputri; Herawati Sudoyo; Hidayat Trimarsanto; Iskandar A Adnan; Khin Saw Myint; Safarina G Malik; Willy Agustine                                                                                                                                                                                                                                 |
| EPI_ISL_467376, EPI_ISL_568687, EPI_ISL_568690, EPI_ISL_568691, EPI_ISL_766044, EPI_ISL_766046                                                                                                                                                                                                                                                                                                                                                                                                                                                                                                                                                                                                                                                                                                                                                                                                                                                       | RSUP Fatmawati                                                                  | Eijkman Institute for Molecular Biology, Ministry of Research and Technology/National Agency for Research and Innovation                                                                                                                                                                                                                                                                                                                                                            |                                                                                                                                                                                                                                                                                                                                                                                                                                                                                                                                                                                                                                                                                                                                                                                                                                         |
| EPI_ISL_1257842, EPI_ISL_1257843, EPI_ISL_1257844, EPI_ISL_1257845, EPI_ISL_1257846, EPI_ISL_2262252                                                                                                                                                                                                                                                                                                                                                                                                                                                                                                                                                                                                                                                                                                                                                                                                                                                 | RSUP Fatmawati                                                                  | National Institute of Health Research and Development                                                                                                                                                                                                                                                                                                                                                                                                                               | Arie Ardiansyah Nugraha; Hana Apsari Pawestri; Hartanti Dian Ikawati; Kartika Dewi Puspa; Krisna Pangesti; Lidya Utami; Luci Liana; Lusiya Ningsih; Nelly Puspandari; Subangkit; Triyani Soekarso; Vivi Setiawaty                                                                                                                                                                                                                                                                                                                                                                                                                                                                                                                                                                                                                       |
| EPI_ISL_2854673, EPI_ISL_2854674, EPI_ISL_2854675, EPI_ISL_2854676, EPI_ISL_2854677, EPI_ISL_2854678, EPI_ISL_2854679, EPI_ISL_2854680, EPI_ISL_2854681, EPI_ISL_2854682, EPI_ISL_2931731, EPI_ISL_2931732, EPI_ISL_2931739, EPI_ISL_2931740, EPI_ISL_2931748, EPI_ISL_2931749, EPI_ISL_2931758, EPI_ISL_2931778, EPI_ISL_2931784, EPI_ISL_2931785, EPI_ISL_2931793, EPI_ISL_2931794, EPI_ISL_2932709, EPI_ISL_2987664, EPI_ISL_2987665, EPI_ISL_4254854, EPI_ISL_4254855, EPI_ISL_4254856, EPI_ISL_4254857, EPI_ISL_4254858, EPI_ISL_4254859, EPI_ISL_4254861, EPI_ISL_4254862, EPI_ISL_4254863, EPI_ISL_4254864, EPI_ISL_4254865, EPI_ISL_4254866                                                                                                                                                                                                                                                                                                  | see above<br>RSUP H Adam Malik                                                  | National Institute of Health Research and Development                                                                                                                                                                                                                                                                                                                                                                                                                               | ; Arie Ardiansyah Nugraha; Fajar Nur Sulistiyohadi; Hana Apsari Pawestri; Hartanti Dian Ikawati; Kartika Dewi Puspa; Krisna Pangesti; Nelly Puspandari; Subangkit; Triyani Soekarso; Vivi Setiawaty                                                                                                                                                                                                                                                                                                                                                                                                                                                                                                                                                                                                                                     |
| EPI_ISL_2047513, EPI_ISL_2047514, EPI_ISL_2047515, EPI_ISL_2047516, EPI_ISL_2047517, EPI_ISL_2047518, EPI_ISL_2047519, EPI_ISL_2047520, EPI_ISL_2047521, EPI_ISL_2047522, EPI_ISL_2047523, EPI_ISL_2047524, EPI_ISL_2047525, EPI_ISL_2047526, EPI_ISL_2047527, EPI_ISL_2047528, EPI_ISL_2106987                                                                                                                                                                                                                                                                                                                                                                                                                                                                                                                                                                                                                                                      | see above<br>RSUP H Adam Malik Medan                                            | National Institute of Health Research and Development                                                                                                                                                                                                                                                                                                                                                                                                                               | Ade Rahmaini; Arie Ardiansyah Nugraha; Hana Apsari Pawestri; Hartanti Dian Ikawati; Kartika Dewi Puspa; Krisna Pangesti; Maliana; Nelly Elfrida Samosir; Nelly Puspandari; Rina Yunita; Subangkit; Triyani Soekarso; Vivi Setiawaty                                                                                                                                                                                                                                                                                                                                                                                                                                                                                                                                                                                                     |
| EPI_ISL_3138944, EPI_ISL_3138945, EPI_ISL_3138946, EPI_ISL_3138947, EPI_ISL_3138948                                                                                                                                                                                                                                                                                                                                                                                                                                                                                                                                                                                                                                                                                                                                                                                                                                                                  | RSUP Nasional Dr. Cipto Mangunkusumo                                            | National Institute of Health Research and Development                                                                                                                                                                                                                                                                                                                                                                                                                               | Arie Ardiansyah Nugraha; Fajar Nur Sulistiyohadi; Hana Apsari Pawestri; Hartanti Dian Ikawati; Kartika Dewi Puspa; Krisna Pangesti; Nelly Puspandari; Subangkit; Triyani Soekarso; Vivi Setiawaty                                                                                                                                                                                                                                                                                                                                                                                                                                                                                                                                                                                                                                       |
| EPI_ISL_3186060, EPI_ISL_3186061, EPI_ISL_3186064, EPI_ISL_3186065, EPI_ISL_3186066, EPI_ISL_3186067, EPI_ISL_3186068, EPI_ISL_3186069, EPI_ISL_3186070, EPI_ISL_3186071, EPI_ISL_3186072, EPI_ISL_3186073, EPI_ISL_3186074, EPI_ISL_3194636, EPI_ISL_3374423, EPI_ISL_3374424, EPI_ISL_3374425                                                                                                                                                                                                                                                                                                                                                                                                                                                                                                                                                                                                                                                      | see above<br>RSUP Persahabatan, Jakarta                                         | Biosafety Level-3 Laboratory, Indonesian Institute of Sciences (LIPI)                                                                                                                                                                                                                                                                                                                                                                                                               | Ade Andriani; Ahmad R. H. Utomo; Alfi T. Fathurahman; Andhika Candra Putra; Andri Wardiana; Anggia Prasetyoputri; Anik B. Dharmayanthi; Asep M. Ridwanulloh; Asep M. Ridwanulloh; Budi Haryanto; Hariyatun; Idris; Indriawati; Isa Nurayana; Jamal Zaini; Linda Sukmarini; Rath A. Ningrum; Sri Swasthikawati; Sugiyono Saputra; Syaiful Rizal; Syam B. Iryanto; Zahrah Saniyyah                                                                                                                                                                                                                                                                                                                                                                                                                                                        |
| EPI_ISL_4106129, EPI_ISL_4106130, EPI_ISL_4106131, EPI_ISL_4106132, EPI_ISL_4106133, EPI_ISL_4106134                                                                                                                                                                                                                                                                                                                                                                                                                                                                                                                                                                                                                                                                                                                                                                                                                                                 | RSUP Persahabatan, Jakarta                                                      | National Research and Innovation Agency (BRIN-Indonesia, VenomCoV Project Team)                                                                                                                                                                                                                                                                                                                                                                                                     | Ade Andriani; Ahmad R. H. Utomo; Andhika Candra Putra; Andri Wardiana; Anggia Prasetyoputri; Asep M. Ridwanulloh; Budi Haryanto; Hariyatun; Jamal Zaini; Rath A. Ningrum; Sugiyono Saputra; Zahrah Saniyyah                                                                                                                                                                                                                                                                                                                                                                                                                                                                                                                                                                                                                             |
| EPI_ISL_467375, EPI_ISL_568694, EPI_ISL_574604                                                                                                                                                                                                                                                                                                                                                                                                                                                                                                                                                                                                                                                                                                                                                                                                                                                                                                       | RSUP Prof. Dr. R. Kandou Manado                                                 | Eijkman Institute for Molecular Biology, Ministry of Research and Technology/National Agency for Research and Innovation                                                                                                                                                                                                                                                                                                                                                            | Amin Soebandrio; David H Muljono; Edison Johar; Frilasita A Yudhaputri; Herawati Sudoyo; Hidayat Trimarsanto; Iskandar A Adnan; Khin Saw Myint; Safarina G Malik; Willy Agustine                                                                                                                                                                                                                                                                                                                                                                                                                                                                                                                                                                                                                                                        |
| EPI_ISL_1257833, EPI_ISL_1257834, EPI_ISL_1257835, EPI_ISL_1257836, EPI_ISL_1257837, EPI_ISL_1257838, EPI_ISL_1257839, EPI_ISL_1257840, EPI_ISL_1257841, EPI_ISL_1824605, EPI_ISL_1824606, EPI_ISL_1915550, EPI_ISL_1915554, EPI_ISL_1915555, EPI_ISL_1915556, EPI_ISL_1915557, EPI_ISL_1915558, EPI_ISL_1915559, EPI_ISL_1915569, EPI_ISL_1915570, EPI_ISL_2106976, EPI_ISL_2106977, EPI_ISL_2106978, EPI_ISL_2987584, EPI_ISL_2987585, EPI_ISL_2987586, EPI_ISL_2987587, EPI_ISL_2987588, EPI_ISL_2987589, EPI_ISL_2987590, EPI_ISL_3138768, EPI_ISL_3138769, EPI_ISL_3138770, EPI_ISL_3138771, EPI_ISL_3138772, EPI_ISL_3138773, EPI_ISL_3138774, EPI_ISL_3138775, EPI_ISL_3138776, EPI_ISL_3138777, EPI_ISL_3138778, EPI_ISL_3138779, EPI_ISL_3138780, EPI_ISL_3138781, EPI_ISL_3138782, EPI_ISL_3138783, EPI_ISL_3138784, EPI_ISL_3278298, EPI_ISL_3691593, EPI_ISL_4090585, EPI_ISL_4090586, EPI_ISL_4090587, EPI_ISL_4090588, EPI_ISL_4090589 | see above<br>RSUP Sanglah                                                       | National Institute of Health Research and Development                                                                                                                                                                                                                                                                                                                                                                                                                               | Arie Ardiansyah Nugraha; Fajar Nur Sulistiyohadi; Hana Apsari Pawestri; Hartanti Dian Ikawati; I Gede Ketut Sajinadiyasa; I Nengah Tony Rustawan; Kartika Dewi Puspa; Krisna Pangesti; Nelly Puspandari; Subangkit; Triyani Soekarso; Vivi Setiawaty                                                                                                                                                                                                                                                                                                                                                                                                                                                                                                                                                                                    |
| EPI_ISL_5022739, EPI_ISL_5022740, EPI_ISL_5022741, EPI_ISL_5022742, EPI_ISL_5022743, EPI_ISL_5022744, EPI_ISL_5022745, EPI_ISL_5022746, EPI_ISL_5022747, EPI_ISL_5022748, EPI_ISL_5022749, EPI_ISL_5022750, EPI_ISL_5022751, EPI_ISL_5022752, EPI_ISL_5022753, EPI_ISL_5022754, EPI_ISL_5022755, EPI_ISL_5022756                                                                                                                                                                                                                                                                                                                                                                                                                                                                                                                                                                                                                                     | see above<br>RSUP Sanglah Bali                                                  | National Institute of Health Research and Development                                                                                                                                                                                                                                                                                                                                                                                                                               | ; Arie Ardiansyah Nugraha; Fajar Nur Sulistiyohadi; Hana Apsari Pawestri; Hartanti Dian Ikawati; Kartika Dewi Puspa; Krisna Pangesti; Nelly Puspandari; Subangkit; Triyani Soekarso; Vivi Setiawaty                                                                                                                                                                                                                                                                                                                                                                                                                                                                                                                                                                                                                                     |
| EPI_ISL_2955606                                                                                                                                                                                                                                                                                                                                                                                                                                                                                                                                                                                                                                                                                                                                                                                                                                                                                                                                      | RSUP Sardjito                                                                   | Genetics Working Group (Pokja Genetik) Faculty of Medicine, Public Health and Nursing Universitas Gadjah Mada (FK-KMK UGM); Disease Investigation Center Wates Ministry of Agriculture Indonesia; Department of Microbiology FK-KMK UGM; Laboratorium Diagnostik Yayasan Tahija World Mosquito Program (WMP) Yogyakarta Center for Tropical Medicine FK-KMK UGM; Integrated Research Center FK-KMK UGM; Department of Computer Science and Electronics FMIPA UGM; RSUP Dr. Sardjito | . Marcellus; Afiahayati; Alvina A Setiawan; Bambang Sigit Riyanto; Dwi AA Nugrahainingsih; Edwin W. Daniwijaya; Eggi Arguni; Eko Budiono; Endah Supriyati; Gunadi; Hendra Wibawa; Heni Retnowulan; Ika Trisnawati; Ira Puspitawati; Khanza a Vujira; Kristy Iskandar; Ludhang P. Rizki; Mohamad S. Hakim; Munawar Gani; Nungki Anggorowati; Nur Imma Fatimah Harahap; Nur Rahmi Ananda; Osman Sianipar; Riat El Khair; Satria Maulana; Siswanto; Sumardi; Titik Nuryastuti; Tri Wibawa; Umi Solekhah Intansari; Yunka Puspadewi; Elizabeth Henny Herningtiyas                                                                                                                                                                                                                                                                           |
| EPI_ISL_3375327, EPI_ISL_3375328, EPI_ISL_3375329, EPI_ISL_3375330, EPI_ISL_3375331, EPI_ISL_3375332, EPI_ISL_3375333, EPI_ISL_3375334, EPI_ISL_3375335, EPI_ISL_3375336, EPI_ISL_3375337, EPI_ISL_3375338, EPI_ISL_3375339, EPI_ISL_3375340, EPI_ISL_3375341, EPI_ISL_3375342, EPI_ISL_3375343, EPI_ISL_3375344, EPI_ISL_3375345, EPI_ISL_3375346, EPI_ISL_3375347, EPI_ISL_3375348, EPI_ISL_3375349, EPI_ISL_3375350, EPI_ISL_3375351, EPI_ISL_3375352, EPI_ISL_3375353, EPI_ISL_3691580                                                                                                                                                                                                                                                                                                                                                                                                                                                           | see above<br>RSUP dr. M Djamil Padang                                           | National Institute of Health Research and Development                                                                                                                                                                                                                                                                                                                                                                                                                               | Arie Ardiansyah Nugraha; Deswita Sari; Fajar Nur Sulistiyohadi; Hana Apsari Pawestri; Hartanti Dian Ikawati; Kartika Dewi Puspa; Krisna Pangesti; Nelly Puspandari; Subangkit; Triyani Soekarso; Vivi Setiawaty                                                                                                                                                                                                                                                                                                                                                                                                                                                                                                                                                                                                                         |
| EPI_ISL_4392618, EPI_ISL_4392619, EPI_ISL_4392620, EPI_ISL_4392621, EPI_ISL_4392622, EPI_ISL_4392623, EPI_ISL_4392624, EPI_ISL_4392625, EPI_ISL_4392626, EPI_ISL_4392627, EPI_ISL_4392628, EPI_ISL_4392629, EPI_ISL_4392630, EPI_ISL_4392631, EPI_ISL_4392632, EPI_ISL_4392633, EPI_ISL_4392634, EPI_ISL_4392635, EPI_ISL_4392636, EPI_ISL_4392637, EPI_ISL_4392638, EPI_ISL_4392639, EPI_ISL_4392640, EPI_ISL_4392641, EPI_ISL_4392642, EPI_ISL_4392643, EPI_ISL_4392644, EPI_ISL_4392646, EPI_ISL_4392647, EPI_ISL_4392648, EPI_ISL_4392649, EPI_ISL_4392650, EPI_ISL_4392651, EPI_ISL_4392652, EPI_ISL_4392653, EPI_ISL_4392654, EPI_ISL_4392656, EPI_ISL_4392657, EPI_ISL_4392658, EPI_ISL_4392659, EPI_ISL_4392660, EPI_ISL_4392662                                                                                                                                                                                                             | see above<br>RSUP dr. Mohammad Hoesin/Fakultas Kedokteran Universitas Sriwijaya | Eijkman Institute for Molecular Biology, National Agency for Research and Innovation; RSUP dr. Mohammad Hoesin/Fakultas Kedokteran Universitas Sriwijaya                                                                                                                                                                                                                                                                                                                            | Ahmad Ghiffari; Amin Soebandrio; Chairil Anwar; Edison Johar; Eny Rahmawati; Frilasita A Yudhaputri; Hidayat Trimarsanto; Iche Andriani Liberty; Iskandar Adnan; Jessica R Saragih; Khin Saw Myint; Lidwina Priliani; Lydia V Panggalo; Muhammad Rezki Rasyak; Nelda Aprilia Salim; Phey Liana; Safarina G Malik; Sukma Oktavianthi; Willy Agustine; Yulia Iriani                                                                                                                                                                                                                                                                                                                                                                                                                                                                       |
| EPI_ISL_3070867, EPI_ISL_3070868, EPI_ISL_3070869, EPI_ISL_3070870, EPI_ISL_3070871                                                                                                                                                                                                                                                                                                                                                                                                                                                                                                                                                                                                                                                                                                                                                                                                                                                                  | RSUP dr. Mohammad Hoesin/Fakultas Kedokteran Universitas Sriwijaya              | Eijkman Institute for Molecular Biology, National Research and Innovation Agency                                                                                                                                                                                                                                                                                                                                                                                                    | Ahmad Ghiffari; Amin Soebandrio; Chairil Anwar; Edison Johar; Eny Rahmawati; Frilasita A Yudhaputri; Hidayat Trimarsanto; Iche Andriani Liberty; Iskandar Adnan; Khin Saw Myint; Lidwina Priliani; Lydia V. Panggalo; Muhammad Rezki Rasyak; Nelda Aprilia Salim; Phey Liana; Safarina G Malik; Sukma Oktavianthi; Willy Agustine; Yulia Iriani                                                                                                                                                                                                                                                                                                                                                                                                                                                                                         |
| EPI_ISL_4549379, EPI_ISL_4549380, EPI_ISL_4549381, EPI_ISL_4549382, EPI_ISL_4549383, EPI_ISL_4549384                                                                                                                                                                                                                                                                                                                                                                                                                                                                                                                                                                                                                                                                                                                                                                                                                                                 | RSUP dr. Mohammad Hoesin/Fakultas Kedokteran Universitas Sriwijaya              | Eijkman Research Center for Molecular Biology, National Research and Innovation Agency; RSUP dr. Mohammad Hoesin/Fakultas Kedokteran Universitas Sriwijaya                                                                                                                                                                                                                                                                                                                          | Ahmad Ghiffari; Amin Soebandrio; Chairil Anwar; Edison Johar; Eny Rahmawati; Frilasita A Yudhaputri; Hidayat Trimarsanto; Iche Andriani Liberty; Iskandar Adnan; Jessica R Saragih; Khin Saw Myint; Lidwina Priliani; Lydia V Panggalo; Muhammad Rezki Rasyak; Nelda Aprilia Salim; Phey Liana; Safarina G Malik; Sukma Oktavianthi; Willy Agustine; Yulia Iriani                                                                                                                                                                                                                                                                                                                                                                                                                                                                       |
| EPI_ISL_525492                                                                                                                                                                                                                                                                                                                                                                                                                                                                                                                                                                                                                                                                                                                                                                                                                                                                                                                                       | RSUP dr. SOERADJI TIRTONEGORO                                                   | Genetics Working Group (Pokja Genetik) Faculty of Medicine, Public Health and Nursing Universitas Gadjah Mada (FK-KMK UGM), Disease Investigation Center Wates Ministry of Agriculture Indonesia, Department of Microbiology FK-                                                                                                                                                                                                                                                    | . Marcellus; . Siswanto; Afiahayati; Alvin S. Kalim; Dwi AA Nugrahainingsih; Dwiki Afandy; Edwin W. Daniwijaya; Eggi Arguni; Endah Supriyati; Gunadi; Hendra Wibawa; Indah Juliana; Kurniyanto; Ludhang P. Rizki; Mohamad S. Hakim; Titik Nuryastuti; Tri Wibawa                                                                                                                                                                                                                                                                                                                                                                                                                                                                                                                                                                        |

|                                                                                                                                                                                                                                                                                                                                                                                                                                                                                                                                                                                                                                                                                                                                                                                                                                                                                                                                                                                                                                                                                                                                                                                                                                                                                                                                                                                                                                                                                                                                                                                                                                                                                                                                                                                                                                                                                                                                                                                                                                                                                                                                                                                                                                                                                                                                                                                                                                                                                                                                                                                                                                                                                                                                                                                                                                                                                                                                                                                                                                            |                                                              |                                                                                                                                                                                                                                                                                                                                                                                                                                                                                     |                                                                                                                                                                                                                                                                                                                                                                                                                                                                                                       |                                                                                                                                                                                                                                                                                                                                                                                        |
|--------------------------------------------------------------------------------------------------------------------------------------------------------------------------------------------------------------------------------------------------------------------------------------------------------------------------------------------------------------------------------------------------------------------------------------------------------------------------------------------------------------------------------------------------------------------------------------------------------------------------------------------------------------------------------------------------------------------------------------------------------------------------------------------------------------------------------------------------------------------------------------------------------------------------------------------------------------------------------------------------------------------------------------------------------------------------------------------------------------------------------------------------------------------------------------------------------------------------------------------------------------------------------------------------------------------------------------------------------------------------------------------------------------------------------------------------------------------------------------------------------------------------------------------------------------------------------------------------------------------------------------------------------------------------------------------------------------------------------------------------------------------------------------------------------------------------------------------------------------------------------------------------------------------------------------------------------------------------------------------------------------------------------------------------------------------------------------------------------------------------------------------------------------------------------------------------------------------------------------------------------------------------------------------------------------------------------------------------------------------------------------------------------------------------------------------------------------------------------------------------------------------------------------------------------------------------------------------------------------------------------------------------------------------------------------------------------------------------------------------------------------------------------------------------------------------------------------------------------------------------------------------------------------------------------------------------------------------------------------------------------------------------------------------|--------------------------------------------------------------|-------------------------------------------------------------------------------------------------------------------------------------------------------------------------------------------------------------------------------------------------------------------------------------------------------------------------------------------------------------------------------------------------------------------------------------------------------------------------------------|-------------------------------------------------------------------------------------------------------------------------------------------------------------------------------------------------------------------------------------------------------------------------------------------------------------------------------------------------------------------------------------------------------------------------------------------------------------------------------------------------------|----------------------------------------------------------------------------------------------------------------------------------------------------------------------------------------------------------------------------------------------------------------------------------------------------------------------------------------------------------------------------------------|
| KMK UGM, Laboratorium Diagnostik Yayasan Tahija World Mosquito Program (WMP) Yogyakarta Center for Tropical Medicine FK-KMK UGM, Integrated Research Center FK-KMK UGM, Department of Computer Science and Electronics FMIPA UGM                                                                                                                                                                                                                                                                                                                                                                                                                                                                                                                                                                                                                                                                                                                                                                                                                                                                                                                                                                                                                                                                                                                                                                                                                                                                                                                                                                                                                                                                                                                                                                                                                                                                                                                                                                                                                                                                                                                                                                                                                                                                                                                                                                                                                                                                                                                                                                                                                                                                                                                                                                                                                                                                                                                                                                                                           |                                                              |                                                                                                                                                                                                                                                                                                                                                                                                                                                                                     |                                                                                                                                                                                                                                                                                                                                                                                                                                                                                                       |                                                                                                                                                                                                                                                                                                                                                                                        |
| EPI_ISL_574605                                                                                                                                                                                                                                                                                                                                                                                                                                                                                                                                                                                                                                                                                                                                                                                                                                                                                                                                                                                                                                                                                                                                                                                                                                                                                                                                                                                                                                                                                                                                                                                                                                                                                                                                                                                                                                                                                                                                                                                                                                                                                                                                                                                                                                                                                                                                                                                                                                                                                                                                                                                                                                                                                                                                                                                                                                                                                                                                                                                                                             | RSUP dr. Sardjito                                            | Eijkman Institute for Molecular Biology, Ministry of Research and Technology/National Agency for Research and Innovation                                                                                                                                                                                                                                                                                                                                                            | Amin Soebandrio; David H Muljono; Edison Johar; Filasita A Yudhaputri; Herawati Sudoyo; Hidayat Trimarsanto; Iskandar A Adnan; Khin Saw Myint; Safarina G Malik; Willy Agustine                                                                                                                                                                                                                                                                                                                       |                                                                                                                                                                                                                                                                                                                                                                                        |
| EPI_ISL_4090590, EPI_ISL_4090591, EPI_ISL_4090592, EPI_ISL_4090593, EPI_ISL_4090594                                                                                                                                                                                                                                                                                                                                                                                                                                                                                                                                                                                                                                                                                                                                                                                                                                                                                                                                                                                                                                                                                                                                                                                                                                                                                                                                                                                                                                                                                                                                                                                                                                                                                                                                                                                                                                                                                                                                                                                                                                                                                                                                                                                                                                                                                                                                                                                                                                                                                                                                                                                                                                                                                                                                                                                                                                                                                                                                                        | RSUP dr. Wahidin Sudirohusodo                                | National Institute of Health Research and Development                                                                                                                                                                                                                                                                                                                                                                                                                               | Arie Ardiansyah Nugraha; Fajar Nur Sulistiyohadi; Hana Apsari Pawestri; Hartanti Dian Ikawati; Kartika Dewi Puspa; Krisna Pangesti; Nelly Puspandari; Subangkit; Triyani Soekarso; Vivi Setiawaty                                                                                                                                                                                                                                                                                                     |                                                                                                                                                                                                                                                                                                                                                                                        |
| EPI_ISL_2601661, EPI_ISL_2601662, EPI_ISL_2601663, EPI_ISL_2601664, EPI_ISL_2601665, EPI_ISL_2601666, EPI_ISL_2601667, EPI_ISL_2601668, EPI_ISL_2601669, EPI_ISL_2601670                                                                                                                                                                                                                                                                                                                                                                                                                                                                                                                                                                                                                                                                                                                                                                                                                                                                                                                                                                                                                                                                                                                                                                                                                                                                                                                                                                                                                                                                                                                                                                                                                                                                                                                                                                                                                                                                                                                                                                                                                                                                                                                                                                                                                                                                                                                                                                                                                                                                                                                                                                                                                                                                                                                                                                                                                                                                   | see above                                                    | RSUPN Cipto Mangunkusumo                                                                                                                                                                                                                                                                                                                                                                                                                                                            | Genomik Solidaritas Indonesia Laboratorium                                                                                                                                                                                                                                                                                                                                                                                                                                                            | Ahmad Zoebad Foeady; Alfin Mohammad Abdillah; Anindya Pradipta Susanto; Annisa Muthiah Sukirman; Anuraj Shankar; Ariel Pradipta; Budi Wiweko; Carissa Sintca Wijaya; Dhahlia Agustina Cahyono; Eka Ginanjar; Eric Tenda; Gracia Felias Enos Korompis; Louisa Markus; Meutia Ayuputeri Kumaheri; Normastuti Adhini Tantyo; Nuri Dyah Indrasari; Pratiwi Sudarmono; Vania Gavrilu Wikasa |
| EPI_ISL_3160399                                                                                                                                                                                                                                                                                                                                                                                                                                                                                                                                                                                                                                                                                                                                                                                                                                                                                                                                                                                                                                                                                                                                                                                                                                                                                                                                                                                                                                                                                                                                                                                                                                                                                                                                                                                                                                                                                                                                                                                                                                                                                                                                                                                                                                                                                                                                                                                                                                                                                                                                                                                                                                                                                                                                                                                                                                                                                                                                                                                                                            | RSUPN Dr. Cipto Mangunkusumo                                 | Eijkman Institute for Molecular Biology, National Research and Innovation Agency                                                                                                                                                                                                                                                                                                                                                                                                    | Amin Soebandrio; Edison Johar; Frilasita A Yudhaputri; Hidayat Trimarsanto; Iskandar Adnan; Khin Saw Myint; Lidwina Priliani; Lydia V. Panggalo; Muhammad Rezki Rasyak; Safarina G Malik; Sukma Oktavianthi; Willy Agustine                                                                                                                                                                                                                                                                           |                                                                                                                                                                                                                                                                                                                                                                                        |
| EPI_ISL_984264, EPI_ISL_1239220                                                                                                                                                                                                                                                                                                                                                                                                                                                                                                                                                                                                                                                                                                                                                                                                                                                                                                                                                                                                                                                                                                                                                                                                                                                                                                                                                                                                                                                                                                                                                                                                                                                                                                                                                                                                                                                                                                                                                                                                                                                                                                                                                                                                                                                                                                                                                                                                                                                                                                                                                                                                                                                                                                                                                                                                                                                                                                                                                                                                            | RSUPN Dr. Cipto Mangunkusumo                                 | National Institute of Health Research and Development                                                                                                                                                                                                                                                                                                                                                                                                                               | Agustiniingsih; Arie Ardiansyah Nugraha; Dewi Wulandari; Fauzul Muna; Hana Apsari Pawestri; Hartanti Dian Ikawati; Henna; Holy Arif Wibowo; Irene Lorinda Indalao; Kartika Dewi Puspa; Kindi Adam; Krisna Nur Andriana Pangesti; Natalie Laurencia Kipuw; Nelly Puspandari; Ni Ketut Susilarini; Nike Susanti; Nuri Dyah Indrasari; Nurika Hariastuti; Reni Herman; Ririn Ramadhany; Subangkit; Tati Febriyanti; Triyani Soekarso; Ulyi Alfi Nikmah; Vivi Setiawaty; Vivi Setiawaty.; Yuni Rukminiati |                                                                                                                                                                                                                                                                                                                                                                                        |
| EPI_ISL_2617502, EPI_ISL_2617503, EPI_ISL_2617504, EPI_ISL_2617505, EPI_ISL_2617506, EPI_ISL_2617507, EPI_ISL_2617508, EPI_ISL_2617509, EPI_ISL_2617510, EPI_ISL_2617511                                                                                                                                                                                                                                                                                                                                                                                                                                                                                                                                                                                                                                                                                                                                                                                                                                                                                                                                                                                                                                                                                                                                                                                                                                                                                                                                                                                                                                                                                                                                                                                                                                                                                                                                                                                                                                                                                                                                                                                                                                                                                                                                                                                                                                                                                                                                                                                                                                                                                                                                                                                                                                                                                                                                                                                                                                                                   | see above                                                    | RSUPP Persahabatan Jakarta                                                                                                                                                                                                                                                                                                                                                                                                                                                          | National Institute of Health Research and Development                                                                                                                                                                                                                                                                                                                                                                                                                                                 | Arie Ardiansyah Nugraha; Hana Apsari Pawestri; Hartanti Dian Ikawati; Kartika Dewi Puspa; Krisna Pangesti; Nelly Puspandari; Subangkit; Triyani Soekarso; Vivi Setiawaty                                                                                                                                                                                                               |
| EPI_ISL_3755956, EPI_ISL_3755957, EPI_ISL_3755958, EPI_ISL_3755959, EPI_ISL_3755960, EPI_ISL_3755961, EPI_ISL_3755962, EPI_ISL_3755963, EPI_ISL_3755964, EPI_ISL_3755965, EPI_ISL_3755966, EPI_ISL_3755967, EPI_ISL_4503235, EPI_ISL_4503236, EPI_ISL_4503237                                                                                                                                                                                                                                                                                                                                                                                                                                                                                                                                                                                                                                                                                                                                                                                                                                                                                                                                                                                                                                                                                                                                                                                                                                                                                                                                                                                                                                                                                                                                                                                                                                                                                                                                                                                                                                                                                                                                                                                                                                                                                                                                                                                                                                                                                                                                                                                                                                                                                                                                                                                                                                                                                                                                                                              | see above                                                    | RUMAH SAKIT DAERAH IDAMAN KOTA BANJARBARU                                                                                                                                                                                                                                                                                                                                                                                                                                           | Genomik Solidaritas Indonesia Laboratorium                                                                                                                                                                                                                                                                                                                                                                                                                                                            | Anna Christina Brazia; Annisa Muthiah Sukirman; Anuraj Shankar; Ariel Pradipta; David Hendra Haryanto; Dhahlia Agustina Cahyono; Gracia Felias Enos Korompis; Louisa Markus; Meutia Ayuputeri Kumaheri; Pratiwi Srikandi Yudhastari; Rahimul Yakim; Reinhart Gabriel; Vania Gavrilu Wikasa                                                                                             |
| EPI_ISL_4549295, EPI_ISL_4549296, EPI_ISL_4549297, EPI_ISL_4549298, EPI_ISL_4549299, EPI_ISL_4549300, EPI_ISL_4549301, EPI_ISL_4549302, EPI_ISL_4549303, EPI_ISL_4549304, EPI_ISL_4549305, EPI_ISL_4549306, EPI_ISL_4549307, EPI_ISL_4549308, EPI_ISL_4549309, EPI_ISL_4549310, EPI_ISL_4549311, EPI_ISL_4549312, EPI_ISL_4549313, EPI_ISL_4549314, EPI_ISL_4549315, EPI_ISL_4549316, EPI_ISL_4549317, EPI_ISL_4549318, EPI_ISL_4549319, EPI_ISL_4549320, EPI_ISL_4549321, EPI_ISL_4549322, EPI_ISL_4549323, EPI_ISL_4549324, EPI_ISL_4549325, EPI_ISL_4549326, EPI_ISL_4549327, EPI_ISL_4549328, EPI_ISL_4549329, EPI_ISL_4549330, EPI_ISL_4549331, EPI_ISL_4549332, EPI_ISL_4549333, EPI_ISL_4549334, EPI_ISL_4549335, EPI_ISL_4549336, EPI_ISL_4549337, EPI_ISL_4549338, EPI_ISL_4549339, EPI_ISL_4549340, EPI_ISL_4549341, EPI_ISL_4549342, EPI_ISL_4549343, EPI_ISL_4549344, EPI_ISL_4549345, EPI_ISL_4549346, EPI_ISL_4549347, EPI_ISL_4549348, EPI_ISL_4549349, EPI_ISL_4549350, EPI_ISL_4549351, EPI_ISL_4549352, EPI_ISL_4549353, EPI_ISL_4549354, EPI_ISL_4549355, EPI_ISL_4549356, EPI_ISL_4549357, EPI_ISL_4549358, EPI_ISL_4549359, EPI_ISL_4549360, EPI_ISL_4549361, EPI_ISL_4549362, EPI_ISL_4549363, EPI_ISL_4549364, EPI_ISL_4549365, EPI_ISL_4549366, EPI_ISL_4549367, EPI_ISL_4549368, EPI_ISL_4549369, EPI_ISL_4549370, EPI_ISL_4549371, EPI_ISL_4549372, EPI_ISL_4549373, EPI_ISL_4549374, EPI_ISL_4549375, EPI_ISL_4549376, EPI_ISL_4549377, EPI_ISL_4549378, EPI_ISL_5021163, EPI_ISL_5021167, EPI_ISL_5021172, EPI_ISL_5021178, EPI_ISL_5021185, EPI_ISL_5021188, EPI_ISL_5021197, EPI_ISL_5021199, EPI_ISL_5021205, EPI_ISL_5021208, EPI_ISL_5021211, EPI_ISL_5021217, EPI_ISL_5021224, EPI_ISL_5021233, EPI_ISL_5021241, EPI_ISL_5021245, EPI_ISL_5021249, EPI_ISL_5021257, EPI_ISL_5021262, EPI_ISL_5021268, EPI_ISL_5021272, EPI_ISL_5021278, EPI_ISL_5021286, EPI_ISL_5021294, EPI_ISL_5021300, EPI_ISL_5021303, EPI_ISL_5021308, EPI_ISL_5021316, EPI_ISL_5395721, EPI_ISL_5395722, EPI_ISL_5395723, EPI_ISL_5395724, EPI_ISL_5395725, EPI_ISL_5395726, EPI_ISL_5395727, EPI_ISL_5395728, EPI_ISL_5395729, EPI_ISL_5395730, EPI_ISL_5395731, EPI_ISL_5395732, EPI_ISL_5395733, EPI_ISL_5395734, EPI_ISL_5395735, EPI_ISL_5395736, EPI_ISL_5395737, EPI_ISL_5395738, EPI_ISL_5395739, EPI_ISL_5395740, EPI_ISL_5395741, EPI_ISL_5395742, EPI_ISL_5395744, EPI_ISL_5395745, EPI_ISL_5395746, EPI_ISL_5395747, EPI_ISL_5395748, EPI_ISL_5395749, EPI_ISL_5395750, EPI_ISL_5395751, EPI_ISL_5395752, EPI_ISL_5395753, EPI_ISL_5395754, EPI_ISL_5395755, EPI_ISL_5395756, EPI_ISL_5395757, EPI_ISL_5395758, EPI_ISL_5395759, EPI_ISL_5395760, EPI_ISL_5395761, EPI_ISL_5395762, EPI_ISL_5395763, EPI_ISL_5395764, EPI_ISL_5395765, EPI_ISL_5395766, EPI_ISL_5395767, EPI_ISL_5395768, EPI_ISL_5395769, EPI_ISL_5395771, EPI_ISL_5395772, EPI_ISL_5395773, EPI_ISL_5395774, EPI_ISL_5395775, EPI_ISL_5395776, EPI_ISL_5395777, EPI_ISL_5395778, EPI_ISL_5395779, EPI_ISL_5395780, EPI_ISL_5395801, EPI_ISL_5395802 | see above                                                    | Raden Mattaher Regional General Hospital (RSUD)                                                                                                                                                                                                                                                                                                                                                                                                                                     | Eijkman Research Center for Molecular Biology, National Research and Innovation Agency; Raden Mattaher Regional General Hospital (RSUD)                                                                                                                                                                                                                                                                                                                                                               | Amin Soebandrio; Edison Johar; Fery Kusnadi; Filasita A Yudhaputri; Hidayat Trimarsanto; Iskandar Adnan; Jessica R Saragih; Khin Saw Myint; Lidwina Priliani; Lydia V Panggalo; Muhammad Rezki Rasyak; Safarina G Malik; Sotianingsih; Sukma Oktavianthi; Willy Agustine; Yusnidar                                                                                                     |
| EPI_ISL_1165076                                                                                                                                                                                                                                                                                                                                                                                                                                                                                                                                                                                                                                                                                                                                                                                                                                                                                                                                                                                                                                                                                                                                                                                                                                                                                                                                                                                                                                                                                                                                                                                                                                                                                                                                                                                                                                                                                                                                                                                                                                                                                                                                                                                                                                                                                                                                                                                                                                                                                                                                                                                                                                                                                                                                                                                                                                                                                                                                                                                                                            | Rahman Rahim Hospital                                        | Institute of Tropical Disease, Universitas Airlangga                                                                                                                                                                                                                                                                                                                                                                                                                                | Aldise M Nastri; Gatot Soegiarto; Jezzy R Dewantari; Kazufumi Shimizu; Krisnoadi Rahardjo; Laksmi Wulandari; Maria I Lusida; Rendra E Febrianto; Resti Yudhawati; Rima R Prasetya; Soetjipto; Yasuko Mori                                                                                                                                                                                                                                                                                             |                                                                                                                                                                                                                                                                                                                                                                                        |
| EPI_ISL_1159391                                                                                                                                                                                                                                                                                                                                                                                                                                                                                                                                                                                                                                                                                                                                                                                                                                                                                                                                                                                                                                                                                                                                                                                                                                                                                                                                                                                                                                                                                                                                                                                                                                                                                                                                                                                                                                                                                                                                                                                                                                                                                                                                                                                                                                                                                                                                                                                                                                                                                                                                                                                                                                                                                                                                                                                                                                                                                                                                                                                                                            | Royal Hospital                                               | Institute of Tropical Disease, Universitas Airlangga                                                                                                                                                                                                                                                                                                                                                                                                                                | Aldise M Nastri; Gatot Soegiarto; Henny P Margastuti; Jezzy R Dewantari; Kazufumi Shimizu; Krisnoadi Rahardjo; Laksmi Wulandari; Maria I Lusida; Resti Yudhawati; Rima R Prasetya; Soetjipto; Yasuko Mori                                                                                                                                                                                                                                                                                             |                                                                                                                                                                                                                                                                                                                                                                                        |
| EPI_ISL_3401869, EPI_ISL_3401870                                                                                                                                                                                                                                                                                                                                                                                                                                                                                                                                                                                                                                                                                                                                                                                                                                                                                                                                                                                                                                                                                                                                                                                                                                                                                                                                                                                                                                                                                                                                                                                                                                                                                                                                                                                                                                                                                                                                                                                                                                                                                                                                                                                                                                                                                                                                                                                                                                                                                                                                                                                                                                                                                                                                                                                                                                                                                                                                                                                                           | Rsia Budhi Jaya                                              | Genomik Solidaritas Indonesia Laboratorium                                                                                                                                                                                                                                                                                                                                                                                                                                          | Annisa Muthiah Sukirman; Anuraj Shankar; Ariel Pradipta; Carissa Sintca Wijaya; Dhahlia Agustina Cahyono; Dwi Oktavia; Gracia Felias Enos Korompis; Himawan Masyhuri; Louisa Markus; Lulu Nursyifa; Meutia Ayuputeri Kumaheri; Ngabila Salama; Tiranti Vindhia; Vania Gavrilu Wikasa                                                                                                                                                                                                                  |                                                                                                                                                                                                                                                                                                                                                                                        |
| EPI_ISL_3401871                                                                                                                                                                                                                                                                                                                                                                                                                                                                                                                                                                                                                                                                                                                                                                                                                                                                                                                                                                                                                                                                                                                                                                                                                                                                                                                                                                                                                                                                                                                                                                                                                                                                                                                                                                                                                                                                                                                                                                                                                                                                                                                                                                                                                                                                                                                                                                                                                                                                                                                                                                                                                                                                                                                                                                                                                                                                                                                                                                                                                            | Rsud Kebayoran Baru                                          | Genomik Solidaritas Indonesia Laboratorium                                                                                                                                                                                                                                                                                                                                                                                                                                          | Annisa Muthiah Sukirman; Anuraj Shankar; Ariel Pradipta; Carissa Sintca Wijaya; Dhahlia Agustina Cahyono; Dwi Oktavia; Gracia Felias Enos Korompis; Himawan Masyhuri; Louisa Markus; Meutia Ayuputeri Kumaheri; Ngabila Salama; Ridho Aulia Rahman; Tiranti Vindhia; Vania Gavrilu Wikasa                                                                                                                                                                                                             |                                                                                                                                                                                                                                                                                                                                                                                        |
| EPI_ISL_4090643, EPI_ISL_4090644                                                                                                                                                                                                                                                                                                                                                                                                                                                                                                                                                                                                                                                                                                                                                                                                                                                                                                                                                                                                                                                                                                                                                                                                                                                                                                                                                                                                                                                                                                                                                                                                                                                                                                                                                                                                                                                                                                                                                                                                                                                                                                                                                                                                                                                                                                                                                                                                                                                                                                                                                                                                                                                                                                                                                                                                                                                                                                                                                                                                           | Rumah Sakit Advent Bandar Lampung                            | National Institute of Health Research and Development                                                                                                                                                                                                                                                                                                                                                                                                                               | Arie Ardiansyah Nugraha; Fajar Nur Sulistiyohadi; Hana Apsari Pawestri; Hartanti Dian Ikawati; Kartika Dewi Puspa; Krisna Pangesti; Nelly Puspandari; Subangkit; Triyani Soekarso; Vivi Setiawaty                                                                                                                                                                                                                                                                                                     |                                                                                                                                                                                                                                                                                                                                                                                        |
| EPI_ISL_516800                                                                                                                                                                                                                                                                                                                                                                                                                                                                                                                                                                                                                                                                                                                                                                                                                                                                                                                                                                                                                                                                                                                                                                                                                                                                                                                                                                                                                                                                                                                                                                                                                                                                                                                                                                                                                                                                                                                                                                                                                                                                                                                                                                                                                                                                                                                                                                                                                                                                                                                                                                                                                                                                                                                                                                                                                                                                                                                                                                                                                             | Rumah Sakit Akademik Universitas Gadjah Mada                 | Genetics Working Group (Pokja Genetik) Faculty of Medicine, Public Health and Nursing Universitas Gadjah Mada (FK-KMK UGM); Disease Investigation Center Wates Ministry of Agriculture Indonesia; Department of Microbiology FK-KMK UGM; Laboratorium Diagnostik Yayasan Tahija World Mosquito Program (WMP) Yogyakarta Center for Tropical Medicine FK-KMK UGM; Integrated Research center FK-KMK UGM; Department of Computer Science and Electronics FMIPA UGM                    | . Marcellus; Afiahayati; Alvin S. Kalim; Desyifa Mursalin; Dwi AA Nugrahaningsih; Edwin W. Daniwijaya; Eggi Arguni; Endah Supriyati; Gunadi; Hendra Wibawa; Ludhang P. Rizki; Mohamad S. Hakim; Siswanto; Titik Nuryastuti; Tri Wibawa                                                                                                                                                                                                                                                                |                                                                                                                                                                                                                                                                                                                                                                                        |
| EPI_ISL_4968082                                                                                                                                                                                                                                                                                                                                                                                                                                                                                                                                                                                                                                                                                                                                                                                                                                                                                                                                                                                                                                                                                                                                                                                                                                                                                                                                                                                                                                                                                                                                                                                                                                                                                                                                                                                                                                                                                                                                                                                                                                                                                                                                                                                                                                                                                                                                                                                                                                                                                                                                                                                                                                                                                                                                                                                                                                                                                                                                                                                                                            | Rumah Sakit Bhayangkara Polda DIY                            | Genetics Working Group (Pokja Genetik) Faculty of Medicine, Public Health and Nursing Universitas Gadjah Mada (FK-KMK UGM); Disease Investigation Center Wates Ministry of Agriculture Indonesia; Department of Microbiology FK-KMK UGM; Laboratorium Diagnostik Yayasan Tahija World Mosquito Program (WMP) Yogyakarta Center for Tropical Medicine FK-KMK UGM; Integrated Research center FK-KMK UGM; Department of Computer Science and Electronics FMIPA UGM; RSUP dr. Sardjito | Afiahayati; Dwi AA Nugrahaningsih; Dwi Indaryati; Edwin W. Daniwijaya; Eggi Arguni; Endah Supriyati; Gunadi; Hana F Hanifin; Hendra Wibawa; Indarto Sulistiyono; Irene Tania; Kristy Iskandar; Ludhang P. Rizki; Marcellus; Mohamad S. Hakim; Nungki Anggorowati; Pramesti G Dewi; Siswanto; Titik Nuryastuti; Tri Wibawa                                                                                                                                                                             |                                                                                                                                                                                                                                                                                                                                                                                        |
| EPI_ISL_4768047                                                                                                                                                                                                                                                                                                                                                                                                                                                                                                                                                                                                                                                                                                                                                                                                                                                                                                                                                                                                                                                                                                                                                                                                                                                                                                                                                                                                                                                                                                                                                                                                                                                                                                                                                                                                                                                                                                                                                                                                                                                                                                                                                                                                                                                                                                                                                                                                                                                                                                                                                                                                                                                                                                                                                                                                                                                                                                                                                                                                                            | Rumah Sakit Islam Al-Ikhlis Pemalang                         | Balai Laboratorium Kesehatan Dan Pengujian Alat Kesehatan Provinsi Jawa Tengah                                                                                                                                                                                                                                                                                                                                                                                                      | Alia Wijayanti; Dwi Nursetyaasih; Dyah Ayu; Endah Wahyu Y; Ismi Farhati; Purnomo; Sekti Handayani; Wiwik Peni; Yekti Hediningsih                                                                                                                                                                                                                                                                                                                                                                      |                                                                                                                                                                                                                                                                                                                                                                                        |
| EPI_ISL_5616317, EPI_ISL_5616399                                                                                                                                                                                                                                                                                                                                                                                                                                                                                                                                                                                                                                                                                                                                                                                                                                                                                                                                                                                                                                                                                                                                                                                                                                                                                                                                                                                                                                                                                                                                                                                                                                                                                                                                                                                                                                                                                                                                                                                                                                                                                                                                                                                                                                                                                                                                                                                                                                                                                                                                                                                                                                                                                                                                                                                                                                                                                                                                                                                                           | Rumah Sakit Islam Sultan Agung Semarang                      | Balai Laboratorium Kesehatan dan Pengujian Alat Kesehatan Provinsi Jawa Tengah                                                                                                                                                                                                                                                                                                                                                                                                      | Alia Wijayanti; Dwi Nursetyaasih; Dyah Ayu; Endah Wahyu Y; Ismi Farhati; Purnomo; Sekti Handayani; Wiwik Peni; Yekti Hediningsih                                                                                                                                                                                                                                                                                                                                                                      |                                                                                                                                                                                                                                                                                                                                                                                        |
| EPI_ISL_5616630, EPI_ISL_5616635                                                                                                                                                                                                                                                                                                                                                                                                                                                                                                                                                                                                                                                                                                                                                                                                                                                                                                                                                                                                                                                                                                                                                                                                                                                                                                                                                                                                                                                                                                                                                                                                                                                                                                                                                                                                                                                                                                                                                                                                                                                                                                                                                                                                                                                                                                                                                                                                                                                                                                                                                                                                                                                                                                                                                                                                                                                                                                                                                                                                           | Rumah Sakit Jawa Daerah Dr. RM. Soedjardadi Klaten           | Balai Laboratorium Kesehatan dan Pengujian Alat Kesehatan Provinsi Jawa Tengah                                                                                                                                                                                                                                                                                                                                                                                                      | Alia Wijayanti; Dwi Nursetyaasih; Dyah Ayu; Endah Wahyu Y; Ismi Farhati; Purnomo; Sekti Handayani; Wiwik Peni; Yekti Hediningsih                                                                                                                                                                                                                                                                                                                                                                      |                                                                                                                                                                                                                                                                                                                                                                                        |
| EPI_ISL_516806                                                                                                                                                                                                                                                                                                                                                                                                                                                                                                                                                                                                                                                                                                                                                                                                                                                                                                                                                                                                                                                                                                                                                                                                                                                                                                                                                                                                                                                                                                                                                                                                                                                                                                                                                                                                                                                                                                                                                                                                                                                                                                                                                                                                                                                                                                                                                                                                                                                                                                                                                                                                                                                                                                                                                                                                                                                                                                                                                                                                                             | Rumah Sakit PKU Gamping                                      | Genetics Working Group (Pokja Genetik) Faculty of Medicine, Public Health and Nursing Universitas Gadjah Mada (FK-KMK UGM); Disease Investigation Center Wates Ministry of Agriculture Indonesia; Department of Microbiology FK-KMK UGM; Laboratorium Diagnostik Yayasan Tahija World Mosquito Program (WMP) Yogyakarta Center for Tropical Medicine FK-KMK UGM; Integrated Research center FK-KMK UGM; Department of Computer Science and Electronics FMIPA UGM                    | . Afiahayati.; Marcellus.; Siswanto; Ardorisye Sapraty Forna; Dwi AA Nugrahaningsih; Edwin W. Daniwijaya; Eggi Arguni; Endah Supriyati; Gunadi; Hendra Wibawa; Kernala Athollah; Ludhang P. Rizki; Mohamad S. Hakim; Titik Nuryastuti; Tri Wibawa                                                                                                                                                                                                                                                     |                                                                                                                                                                                                                                                                                                                                                                                        |
| EPI_ISL_4761491                                                                                                                                                                                                                                                                                                                                                                                                                                                                                                                                                                                                                                                                                                                                                                                                                                                                                                                                                                                                                                                                                                                                                                                                                                                                                                                                                                                                                                                                                                                                                                                                                                                                                                                                                                                                                                                                                                                                                                                                                                                                                                                                                                                                                                                                                                                                                                                                                                                                                                                                                                                                                                                                                                                                                                                                                                                                                                                                                                                                                            | Rumah Sakit PKU Muhammadiyah Cepu                            | Balai Laboratorium Kesehatan Dan Pengujian Alat Kesehatan Provinsi Jawa Tengah                                                                                                                                                                                                                                                                                                                                                                                                      | Alia Wijayanti; Dwi Nursetyaasih; Dyah Ayu; Endah Wahyu Y; Ismi Farhati; Purnomo; Sekti Handayani; Wiwik Peni; Yekti Hediningsih                                                                                                                                                                                                                                                                                                                                                                      |                                                                                                                                                                                                                                                                                                                                                                                        |
| EPI_ISL_3230236                                                                                                                                                                                                                                                                                                                                                                                                                                                                                                                                                                                                                                                                                                                                                                                                                                                                                                                                                                                                                                                                                                                                                                                                                                                                                                                                                                                                                                                                                                                                                                                                                                                                                                                                                                                                                                                                                                                                                                                                                                                                                                                                                                                                                                                                                                                                                                                                                                                                                                                                                                                                                                                                                                                                                                                                                                                                                                                                                                                                                            | Rumah Sakit Pantai Indah Kapuk / DINAS KESEHATAN DKI JAKARTA | Genomik Solidaritas Indonesia Laboratorium                                                                                                                                                                                                                                                                                                                                                                                                                                          | Annisa Muthiah Sukirman; Anuraj Shankar; Ariel Pradipta; Carissa Sintca Wijaya; Gracia Felias Enos Korompis; Hartini Cahyadi; Irwan Idris; Leonardo H Simanjuntak; Meutia Ayuputeri Kumaheri; Reinhart Gabriel; Vania Gavrilu Wikasa                                                                                                                                                                                                                                                                  |                                                                                                                                                                                                                                                                                                                                                                                        |
| EPI_ISL_4756061                                                                                                                                                                                                                                                                                                                                                                                                                                                                                                                                                                                                                                                                                                                                                                                                                                                                                                                                                                                                                                                                                                                                                                                                                                                                                                                                                                                                                                                                                                                                                                                                                                                                                                                                                                                                                                                                                                                                                                                                                                                                                                                                                                                                                                                                                                                                                                                                                                                                                                                                                                                                                                                                                                                                                                                                                                                                                                                                                                                                                            | Rumah Sakit Pelita Anugerah Demak                            | Balai Laboratorium Kesehatan Dan Pengujian Alat Kesehatan Provinsi Jawa Tengah                                                                                                                                                                                                                                                                                                                                                                                                      | Alia Wijayanti; Dwi Nursetyaasih; Dyah Ayu; Endah Wahyu Y; Ismi Farhati; Purnomo; Sekti Handayani; Wiwik Peni; Yekti Hediningsih                                                                                                                                                                                                                                                                                                                                                                      |                                                                                                                                                                                                                                                                                                                                                                                        |
| EPI_ISL_5616539                                                                                                                                                                                                                                                                                                                                                                                                                                                                                                                                                                                                                                                                                                                                                                                                                                                                                                                                                                                                                                                                                                                                                                                                                                                                                                                                                                                                                                                                                                                                                                                                                                                                                                                                                                                                                                                                                                                                                                                                                                                                                                                                                                                                                                                                                                                                                                                                                                                                                                                                                                                                                                                                                                                                                                                                                                                                                                                                                                                                                            | Rumah Sakit Permata Medika Semarang                          | Balai Laboratorium Kesehatan dan Pengujian Alat Kesehatan Provinsi Jawa Tengah                                                                                                                                                                                                                                                                                                                                                                                                      | Alia Wijayanti; Dwi Nursetyaasih; Dyah Ayu; Endah Wahyu Y; Ismi Farhati; Purnomo; Sekti Handayani; Wiwik Peni; Yekti Hediningsih                                                                                                                                                                                                                                                                                                                                                                      |                                                                                                                                                                                                                                                                                                                                                                                        |
| EPI_ISL_5616612                                                                                                                                                                                                                                                                                                                                                                                                                                                                                                                                                                                                                                                                                                                                                                                                                                                                                                                                                                                                                                                                                                                                                                                                                                                                                                                                                                                                                                                                                                                                                                                                                                                                                                                                                                                                                                                                                                                                                                                                                                                                                                                                                                                                                                                                                                                                                                                                                                                                                                                                                                                                                                                                                                                                                                                                                                                                                                                                                                                                                            | Rumah Sakit Roemani Semarang                                 | Balai Laboratorium Kesehatan dan Pengujian Alat Kesehatan Provinsi Jawa Tengah                                                                                                                                                                                                                                                                                                                                                                                                      | Alia Wijayanti; Dwi Nursetyaasih; Dyah Ayu; Endah Wahyu Y; Ismi Farhati; Purnomo; Sekti Handayani; Wiwik Peni; Yekti Hediningsih                                                                                                                                                                                                                                                                                                                                                                      |                                                                                                                                                                                                                                                                                                                                                                                        |
| EPI_ISL_2875769, EPI_ISL_2875770, EPI_ISL_2875772, EPI_ISL_2875773, EPI_ISL_2875775, EPI_ISL_2875776, EPI_ISL_2875778, EPI_ISL_2875780, EPI_ISL_2875781, EPI_ISL_2875783, EPI_ISL_2875784, EPI_ISL_2875786, EPI_ISL_2875787                                                                                                                                                                                                                                                                                                                                                                                                                                                                                                                                                                                                                                                                                                                                                                                                                                                                                                                                                                                                                                                                                                                                                                                                                                                                                                                                                                                                                                                                                                                                                                                                                                                                                                                                                                                                                                                                                                                                                                                                                                                                                                                                                                                                                                                                                                                                                                                                                                                                                                                                                                                                                                                                                                                                                                                                                | see above                                                    | Rumah Sakit Umum Daerah Kota Mataram                                                                                                                                                                                                                                                                                                                                                                                                                                                | Genomik Solidaritas Indonesia Laboratorium                                                                                                                                                                                                                                                                                                                                                                                                                                                            | Ahmad Zoebad Foeady; Alfin Muhammad Abdillah; Anindya Pradipta Susanto; Anna Christina Brazia; Annisa Muthiah Sukirman; Anuraj Shankar; Ariel Pradipta; Dhahlia Agustina Cahyono; Gracia Felias Enos Korompis; Himawan Masyhuri; Laely Indrayanti; Louisa Markus; Meutia Ayuputeri Kumaheri; Normastuti Adhini Tantyo                                                                  |
| EPI_ISL_1969246, EPI_ISL_1969247, EPI_ISL_1969248, EPI_ISL_2047533, EPI_ISL_2047534, EPI_ISL_2047535, EPI_ISL_2047536, EPI_ISL_2047537, EPI_ISL_2047538, EPI_ISL_2047539, EPI_ISL_2047540, EPI_ISL_2047541, EPI_ISL_2047542, EPI_ISL_2047543, EPI_ISL_2047544, EPI_ISL_2047545, EPI_ISL_2047546, EPI_ISL_2047547, EPI_ISL_2047548, EPI_ISL_2047549, EPI_ISL_2047550                                                                                                                                                                                                                                                                                                                                                                                                                                                                                                                                                                                                                                                                                                                                                                                                                                                                                                                                                                                                                                                                                                                                                                                                                                                                                                                                                                                                                                                                                                                                                                                                                                                                                                                                                                                                                                                                                                                                                                                                                                                                                                                                                                                                                                                                                                                                                                                                                                                                                                                                                                                                                                                                        | see above                                                    | Rumah Sakit Umum Daerah Palangkaraya                                                                                                                                                                                                                                                                                                                                                                                                                                                | National Institute of Health Research and Development                                                                                                                                                                                                                                                                                                                                                                                                                                                 | Alla Yunita; Arie Ardiansyah Nugraha; Fransiska JLA; Hana Apsari Pawestri; Hartanti Dian Ikawati; Kartika Dewi Puspa; Krisna Pangesti; Mayawati Mewo; Nelly Puspandari; Subangkit; Triyani Soekarso; Vivi Setiawaty                                                                                                                                                                    |
| EPI_ISL_5616230, EPI_ISL_5616392, EPI_ISL_5616525                                                                                                                                                                                                                                                                                                                                                                                                                                                                                                                                                                                                                                                                                                                                                                                                                                                                                                                                                                                                                                                                                                                                                                                                                                                                                                                                                                                                                                                                                                                                                                                                                                                                                                                                                                                                                                                                                                                                                                                                                                                                                                                                                                                                                                                                                                                                                                                                                                                                                                                                                                                                                                                                                                                                                                                                                                                                                                                                                                                          | Rumah Sakit Umum Daerah Tugurejo                             | Balai Laboratorium Kesehatan dan Pengujian Alat Kesehatan Provinsi Jawa Tengah                                                                                                                                                                                                                                                                                                                                                                                                      | Alia Wijayanti; Dwi Nursetyaasih; Dyah Ayu; Endah Wahyu Y; Ismi Farhati; Purnomo; Sekti Handayani; Wiwik Peni; Yekti Hediningsih                                                                                                                                                                                                                                                                                                                                                                      |                                                                                                                                                                                                                                                                                                                                                                                        |
| EPI_ISL_3541165, EPI_ISL_3541166, EPI_ISL_3541167, EPI_ISL_3541168, EPI_ISL_3541169, EPI_ISL_3541170, EPI_ISL_3541171, EPI_ISL_3541172, EPI_ISL_3541173, EPI_ISL_3541174, EPI_ISL_3541175, EPI_ISL_3541176, EPI_ISL_3541177, EPI_ISL_3541178, EPI_ISL_3541179, EPI_ISL_3541180, EPI_ISL_3541181, EPI_ISL_3541182, EPI_ISL_3541183, EPI_ISL_3541184, EPI_ISL_3541185, EPI_ISL_3541186, EPI_ISL_3541187, EPI_ISL_3541188, EPI_ISL_3691582, EPI_ISL_3691583, EPI_ISL_3691584                                                                                                                                                                                                                                                                                                                                                                                                                                                                                                                                                                                                                                                                                                                                                                                                                                                                                                                                                                                                                                                                                                                                                                                                                                                                                                                                                                                                                                                                                                                                                                                                                                                                                                                                                                                                                                                                                                                                                                                                                                                                                                                                                                                                                                                                                                                                                                                                                                                                                                                                                                  | see above                                                    | Rumah Sakit Umum Daerah Ulin Banjarmasin                                                                                                                                                                                                                                                                                                                                                                                                                                            | National Institute of Health Research and Development                                                                                                                                                                                                                                                                                                                                                                                                                                                 | Arie Ardiansyah Nugraha; Fajar Nur Sulistiyohadi; Hana Apsari Pawestri; Hartanti Dian Ikawati; Kartika Dewi Puspa; Krisna Pangesti; Munaroh Pasaribu; Nelly Puspandari; Subangkit; Triyani Soekarso; Vivi Setiawaty                                                                                                                                                                    |
| EPI_ISL_2860296, EPI_ISL_2860297, EPI_ISL_2860298, EPI_ISL_2860299                                                                                                                                                                                                                                                                                                                                                                                                                                                                                                                                                                                                                                                                                                                                                                                                                                                                                                                                                                                                                                                                                                                                                                                                                                                                                                                                                                                                                                                                                                                                                                                                                                                                                                                                                                                                                                                                                                                                                                                                                                                                                                                                                                                                                                                                                                                                                                                                                                                                                                                                                                                                                                                                                                                                                                                                                                                                                                                                                                         | Rumah Sakit Umum Medika Dramaga                              | Biosafety Level-3 Laboratory, Indonesian Institute of Sciences (LIPI)                                                                                                                                                                                                                                                                                                                                                                                                               | Andri Wardiana; Anik B. Dharmayanthi; Asep M.Ridwanulloh; Indriawati; Listiana Oktavia; Sugiyono Saputra; Syam B. Iryanto; Yuliawati                                                                                                                                                                                                                                                                                                                                                                  |                                                                                                                                                                                                                                                                                                                                                                                        |
| EPI_ISL_1048373                                                                                                                                                                                                                                                                                                                                                                                                                                                                                                                                                                                                                                                                                                                                                                                                                                                                                                                                                                                                                                                                                                                                                                                                                                                                                                                                                                                                                                                                                                                                                                                                                                                                                                                                                                                                                                                                                                                                                                                                                                                                                                                                                                                                                                                                                                                                                                                                                                                                                                                                                                                                                                                                                                                                                                                                                                                                                                                                                                                                                            | Rumah Sakit Umum Pusat Dr.                                   | National Institute of Health Research and Development                                                                                                                                                                                                                                                                                                                                                                                                                               | Arie Ardiansyah Nugraha; Hana Apsari Pawestri; Hartanti Dian Ikawati; Iva Puspitasari; Kartika Dewi Puspa; Krisna Nur Andriana Pangesti; Nelly Puspandari; Subangkit; Vivi Setiawaty.                                                                                                                                                                                                                                                                                                                 |                                                                                                                                                                                                                                                                                                                                                                                        |

|                                                                                                                                                                                                                                                                                                                                                                                                       |                                                |                                                                                                                                                                                                                 |                                                                                                                                                                                                                                                                                                                                                                                                                                      |
|-------------------------------------------------------------------------------------------------------------------------------------------------------------------------------------------------------------------------------------------------------------------------------------------------------------------------------------------------------------------------------------------------------|------------------------------------------------|-----------------------------------------------------------------------------------------------------------------------------------------------------------------------------------------------------------------|--------------------------------------------------------------------------------------------------------------------------------------------------------------------------------------------------------------------------------------------------------------------------------------------------------------------------------------------------------------------------------------------------------------------------------------|
| EPI_ISL_1265171, EPI_ISL_4090577                                                                                                                                                                                                                                                                                                                                                                      | Kariadi Semarang                               | National Institute of Health Research and Development                                                                                                                                                           | Arie Ardiansyah Nugraha; Fajar Nur Sulistiyohadi; Hana Aparsi Pawestri; Hartanti Dian Ikawati; Kartika Dewi Puspa; Krisna Pangesti; Lidya Utami; Luci Liana; Lusuya Ningsih; Nelly Puspandari; Subangkit; Triyani Soekarso; Vivi Setiawaty                                                                                                                                                                                           |
|                                                                                                                                                                                                                                                                                                                                                                                                       | Rumah Sakit Umum Pusat Fatmawati               |                                                                                                                                                                                                                 |                                                                                                                                                                                                                                                                                                                                                                                                                                      |
| EPI_ISL_1265273                                                                                                                                                                                                                                                                                                                                                                                       | Rumah Sakit Umum Pusat H. Adam Malik           | National Institute of Health Research and Development                                                                                                                                                           | Ade Rahmaini; Arie Ardiansyah Nugraha; Hana Aparsi Pawestri; Hartanti Dian Ikawati; Kartika Dewi Puspa; Krisna Pangesti; Maliana; Nelly Elfrida Samosir; Nelly Puspandari; Rina Yunita; Subangkit; Vivi Setiawaty                                                                                                                                                                                                                    |
| EPI_ISL_1265168                                                                                                                                                                                                                                                                                                                                                                                       | Rumah Sakit Umum Pusat Sanglah                 | National Institute of Health Research and Development                                                                                                                                                           | Arie Ardiansyah Nugraha; Hana Aparsi Pawestri; Hartanti Dian Ikawati; I Gede Ketut Sajinadiyasa; I Nengah Tony Rustawan; Kartika Dewi Puspa; Krisna Pangesti; Nelly Puspandari; Subangkit; Vivi Setiawaty                                                                                                                                                                                                                            |
| EPI_ISL_3957749                                                                                                                                                                                                                                                                                                                                                                                       | Rumah Sakit Umum Siloam (RSUS)                 | Mochtar Riady Institute for Nanotechnology-Universitas Pelita Harapan; Eijkman Institute for Molecular Biology, National Research and Innovation Agency                                                         | Aksar C Lages; Amin Soebandrio; David Rustandi; Edison Johar; Febi Andriani; Filasita A Yudhaputri; Hidayat Trimarsanto; Irawan Yusuf; Iskandar Adnan; Ivet M Suriapranata; Juandy Jo; Khin Saw Myint; Lidwina Priliani; Lydia V. Panggalo; Muhammad Rezki Rasyak; Rinaldy Kusuma; Riska N Taufik; Rury M Wahyuni; Safarina G Malik; Sukma Oktavianthi; Tandry Meriyanti; Tri Shinta Kurniasih; Willy Agustine; Young O Larasati     |
| EPI_ISL_759842                                                                                                                                                                                                                                                                                                                                                                                        | Rumah Sakit Universitas Sebelas Maret (RS-UNS) | Universitas Sebelas Maret (UNS); Rumah Sakit Universitas Sebelas Maret (RS-UNS), Surakarta; National Institute of Health Research and Development, Indonesian Ministry of Health, Jakarta.                      | Alif Awicena Ghufron; Arie Ardiansyah Nugraha; Betty Suryawati; Dewi Puspa; Hana Aparsi Pawestri; Hartanti Dian Ika; Hartono; Kartika; Maryani; Vivi Setiawaty.; Yulia Sari                                                                                                                                                                                                                                                          |
| EPI_ISL_4730573, EPI_ISL_4730574, EPI_ISL_4730575, EPI_ISL_4730576, EPI_ISL_4730577, EPI_ISL_4730578, EPI_ISL_4730579, EPI_ISL_4730580, EPI_ISL_4730581, EPI_ISL_5022955                                                                                                                                                                                                                              | see above                                      | National Institute of Health Research and Development                                                                                                                                                           | Arie Ardiansyah Nugraha; Fajar Nur Sulistiyohadi; Hana Aparsi Pawestri; Hartanti Dian Ikawati; Kartika Dewi Puspa; Krisna Pangesti; Nelly Puspandari; Subangkit; Triyani Soekarso; Vivi Setiawaty                                                                                                                                                                                                                                    |
| EPI_ISL_3375354, EPI_ISL_3375355, EPI_ISL_3375356, EPI_ISL_3375357, EPI_ISL_3375358, EPI_ISL_3375359, EPI_ISL_3375360, EPI_ISL_3375361, EPI_ISL_3375362, EPI_ISL_3375363, EPI_ISL_3375364, EPI_ISL_3375365, EPI_ISL_3375366, EPI_ISL_3375367, EPI_ISL_3375368, EPI_ISL_3375369, EPI_ISL_3375370, EPI_ISL_3375371, EPI_ISL_3375372, EPI_ISL_3375373, EPI_ISL_3375374, EPI_ISL_3375375                  | see above                                      | National Institute of Health Research and Development                                                                                                                                                           | Andriani; Arie Ardiansyah Nugraha; Delima Fajar Liana; Fajar Nur Sulistiyohadi; Hana Aparsi Pawestri; Hartanti Dian Ikawati; Kartika Dewi Puspa; Krisna Pangesti; Nelly Puspandari; Puji Astuti; Puji Astuti Vivi Setiawaty; Sofi Siti Shofiyah; Subangkit; Triyani Soekarso; Virhan Novianry; Vivi Setiawaty                                                                                                                        |
| EPI_ISL_4468543, EPI_ISL_4468544                                                                                                                                                                                                                                                                                                                                                                      | SMARTCO LABORATORY & RESEARCH                  | Genomik Solidaritas Indonesia Laboratorium                                                                                                                                                                      | Annisa Muthiah Sukirman; Anuraj Shankar; Ariel Pradipta; Carissa Sintca Wijaya; Dhahlia Agustina Cahyono; Dian Tri Wahyudi; Gracia Felias Enos Korompis; Himawan Masyhuri; Louisa Markus; Maria Mardalena Martini Kaisar; Meutia Ayuputeri Kumaheri; Sem Samuel Surja; Stefanus Bernard; Suratno Lulut Ratnoglik                                                                                                                     |
| EPI_ISL_2723605, EPI_ISL_2723606, EPI_ISL_2723607, EPI_ISL_2723608, EPI_ISL_2723609, EPI_ISL_2723610, EPI_ISL_2723611, EPI_ISL_2723612, EPI_ISL_2723613, EPI_ISL_2723614, EPI_ISL_2723615, EPI_ISL_2723616, EPI_ISL_2723617, EPI_ISL_2723619                                                                                                                                                          | see above                                      | Genomik Solidaritas Indonesia Laboratorium                                                                                                                                                                      | Alfin Mohammad Abdillah; Annisa Muthiah Sukirman; Anuraj Shankar; Ariel Pradipta; Carissa Sintca Wijaya; Dhahlia Agustina Cahyono; Dwi Oktavia; Gracia Felias Enos Korompis; Meutia Ayuputeri Kumaheri; Mohammad Anang Syarifudin; Ngablia Salama; Normastuti Adhini Tanty; Tiranti Vindha; Vania Gavrilu Wikasa; Widayastuti                                                                                                        |
| EPI_ISL_529718                                                                                                                                                                                                                                                                                                                                                                                        | Santo Borromeus Hospital                       | Laboratorium Kesehatan Provinsi Jawa Barat; School of Life Sciences and Technology & School of Pharmacy-Institut Teknologi Bandung; Molecular Genetics Laboratory-Faculty of Medicine-Universitas Padjadjaran   | Adelina Khristiani Rahayu; Agung Eru Wibowo; Azzania Fibriani; Catur Riani; Cut Nur Cinthia Alamanda; Ema Rahmawati; Gusti Ayu Prani Pradani; Hammam Riza; Hesti Lina Wiraswati; Husna Nugrahapraja; Irvan Faizal; Lia Faridah; Marselina Irasonia Tan; Rifky Waluyajati Rachman; Ryan Bayusantika Ristandi; Savira Ekawardhani; Soni Solistia Wirawan; Tarwadi; Yulia Sribudiani                                                    |
| EPI_ISL_528751                                                                                                                                                                                                                                                                                                                                                                                        | Santo Borromeus Hospital                       | Molecular Genetics Laboratory-Faculty of Medicine-Universitas Padjadjaran; School of Life Sciences and Technology & School of Pharmacy-Institut Teknologi Bandung; Laboratorium Kesehatan Provinsi Jawa Barat   | Agung Eru Wibowo; Azzania Fibriani; Catur Riani; Cut Nur Cinthia Alamanda; Ema Rahmawati; Fensi Amalina; Hammam Riza; Hesti Lina Wiraswati; Husna Nugrahapraja; Irvan Faizal; Lia Faridah; Marselina Irasonia Tan; Mas Rizky A.A. Syamsunarno; Rifky Waluyajati Rachman; Ryan Bayusantika Ristandi; Savira Ekawardhani; Soni Solistia Wirawan; Tarwadi; Tri Hanggono Achmad; Yulia Sribudiani                                        |
| EPI_ISL_528750, EPI_ISL_528759                                                                                                                                                                                                                                                                                                                                                                        | Santo Borromeus Hospital                       | School of Life Sciences and Technology & School of Pharmacy-Institut Teknologi Bandung; Molecular Genetics Laboratory-Faculty of Medicine-Universitas Padjadjaran; Laboratorium Kesehatan Provinsi Jawa Barat   | Agung Eru Wibowo; Azzania Fibriani; Catur Riani; Cut Nur Cinthia Alamanda; Ema Rahmawati; Fensi Amalina; Hammam Riza; Hesti Lina Wiraswati; Husna Nugrahapraja; Irvan Faizal; Karimatu Khoirunnisa; Lia Faridah; Marselina Irasonia Tan; Mas Rizky A.A. Syamsunarno; Miftahul Faridi; Rifky Waluyajati Rachman; Ryan Bayusantika Ristandi; Savira Ekawardhani; Soni Solistia Wirawan; Tarwadi; Tri Hanggono Achmad; Yulia Sribudiani |
| EPI_ISL_528747                                                                                                                                                                                                                                                                                                                                                                                        | Santo Borromeus Hospital                       | School of Pharmacy & School of Life Sciences and Technology - Institut Teknologi Bandung; Molecular Genetics Laboratory-Faculty of Medicine-Universitas Padjadjaran; Laboratorium Kesehatan Provinsi Jawa Barat | Agung Eru Wibowo; Azzania Fibriani; Catur Riani; Cut Nur Cinthia Alamanda; Ema Rahmawati; Hammam Riza; Hesti Lina Wiraswati; Husna Nugrahapraja; Irvan Faizal; Karimatu Khoirunnisa; Lia Faridah; Marselina Irasonia Tan; Miftahul Faridi; Rifky Waluyajati Rachman; Ryan Bayusantika Ristandi; Savira Ekawardhani; Soni Solistia Wirawan; Tarwadi; Yulia Sribudiani                                                                 |
| EPI_ISL_1615658                                                                                                                                                                                                                                                                                                                                                                                       | Santo Borromeus Hospital                       | West Java Health Laboratory; School of Life Sciences and Technology, Institut Teknologi Bandung                                                                                                                 | Aulia Saraswati Wicaksono; Azzania Fibriani; Cut Nur Cinthia Alamanda; Ema Rahmawati; Karimatu Khoirunnisa; Miftahul Faridi; Rifky Waluyajati Rachman; Rini Robiani; Ryan Bayusantika Ristandi                                                                                                                                                                                                                                       |
| EPI_ISL_3691595                                                                                                                                                                                                                                                                                                                                                                                       | Santos Hospital Bandung                        | National Institute of Health Research and Development                                                                                                                                                           | Arie Ardiansyah Nugraha; Fajar Nur Sulistiyohadi; Hana Aparsi Pawestri; Hartanti Dian Ikawati; Kartika Dewi Puspa; Krisna Pangesti; Nelly Puspandari; Subangkit; Triyani Soekarso; Vivi Setiawaty                                                                                                                                                                                                                                    |
| EPI_ISL_754239                                                                                                                                                                                                                                                                                                                                                                                        | Santosa Hospital Bandung Central               | "School of Life Sciences and Technology & School of Pharmacy-Institut Teknologi Bandung; Molecular Genetics Laboratory-Faculty of Medicine-Universitas Padjadjaran; Laboratorium Kesehatan Provinsi Jawa Barat" | Agung Eru Wibowo; Azzania Fibriani; Catur Riani; Cut Nur Cinthia Alamanda; Ema Rahmawati; Hammam Riza; Hesti Lina Wiraswati; Husna Nugrahapraja; Irvan Faizal; Karimatu Khoirunnisa; Lia Faridah; Marselina Irasonia Tan; Miftahul Faridi; Rifky Waluyajati Rachman; Ryan Bayusantika Ristandi; Savira Ekawardhani; Soni Solistia Wirawan; Tarwadi; Yulia Sribudiani                                                                 |
| EPI_ISL_528749                                                                                                                                                                                                                                                                                                                                                                                        | Santosa Hospital Bandung Central               | School of Life Sciences and Technology & School of Pharmacy-Institut Teknologi Bandung; Molecular Genetics Laboratory-Faculty of Medicine-Universitas Padjadjaran; Laboratorium Kesehatan Provinsi Jawa Barat   | Agung Eru Wibowo; Azzania Fibriani; Catur Riani; Cut Nur Cinthia Alamanda; Davin H. E. Setiarmaga; Ema Rahmawati; Hammam Riza; Hesti Lina Wiraswati; Husna Nugrahapraja; Irvan Faizal; Lia Faridah; Marselina Irasonia Tan; Rifky Waluyajati Rachman; Rizki Mardian; Ryan Bayusantika Ristandi; Savira Ekawardhani; Soni Solistia Wirawan; Tarwadi; Yulia Sribudiani                                                                 |
| EPI_ISL_511878                                                                                                                                                                                                                                                                                                                                                                                        | Santosa Hospital Bandung Kopo                  | Laboratorium Kesehatan Provinsi Jawa Barat; Molecular Genetics Laboratory-Faculty of Medicine-Universitas Padjadjaran; School of Life Sciences and Technology & School of Pharmacy-Institut Teknologi Bandung   | Agung Eru Wibowo; Azzania Fibriani; Catur Riani; Cut Nur Cinthia Alamanda; Ema Rahmawati; Hammam Riza; Hesti Lina Wiraswati; Husna Nugrahapraja; Lia Faridah; Marselina Irasonia Tan; Rifky Waluyajati Rachman; Ryan Bayusantika Ristandi; Savira Ekawardhani; Soni Solistia Wirawan; Tarwadi; Yulia Sribudiani                                                                                                                      |
| EPI_ISL_1615586, EPI_ISL_1634471, EPI_ISL_1634475, EPI_ISL_1660419                                                                                                                                                                                                                                                                                                                                    | Santosa Kopo Hospital                          | West Java Health Laboratory; School of Life Sciences and Technology, Institut Teknologi Bandung                                                                                                                 | Aulia Saraswati Wicaksono; Azzania Fibriani; Cut Nur Cinthia Alamanda; Ema Rahmawati; Karimatu Khoirunnisa; Miftahul Faridi; Rifky Waluyajati Rachman; Rini Robiani; Ryan Bayusantika Ristandi                                                                                                                                                                                                                                       |
| EPI_ISL_1159390                                                                                                                                                                                                                                                                                                                                                                                       | Semen Gresik Hospital                          | Institute of Tropical Disease, Universitas Airlangga                                                                                                                                                            | Aldise M Nastri; Gatot Soegiarto; Jezy R Dewantari; Kazufumi Shimizu; Krisnoadi Rahardjo; Laksmi Wulandari; Maria I Lusida; Muchdro; Resti Yudhawati; Rima R Prasetya; Soetjipto; Yasuko Mori                                                                                                                                                                                                                                        |
| EPI_ISL_1795056                                                                                                                                                                                                                                                                                                                                                                                       | Siloam Hospital                                | Institute of Tropical Disease, Universitas Airlangga                                                                                                                                                            | Aldise M Nastri; Gatot Soegiarto; Jezy R Dewantari; Kazufumi Shimizu; Krisnoadi Rahardjo; Laksmi Wulandari; Maria I Lusida; Maria M Padmidevi; Mitsuhiro Nishimura; Resti Yudhawati; Retno A Setyoningrum; Rima R Prasetya; Soetjipto; Yasuko Mori; Yokho K Shimizu                                                                                                                                                                  |
| EPI_ISL_4885349, EPI_ISL_4885350                                                                                                                                                                                                                                                                                                                                                                      | Siloam Hospital                                | West Java Health Laboratory                                                                                                                                                                                     | Azzania Fibriani; Cut Nur Cinthia Alamanda; Ema Rahmawati; Isak Solihin; Karimatu Khoirunnisa; Miftahul Faridi; Rifky Waluyajati Rachman; Rini Robiani; Ryan Bayusantika Ristandi                                                                                                                                                                                                                                                    |
| EPI_ISL_3957707, EPI_ISL_3957708, EPI_ISL_3957726, EPI_ISL_3957734, EPI_ISL_3957763, EPI_ISL_3957764                                                                                                                                                                                                                                                                                                  | Siloam Hospital Bangka Belitung (SHBB)         | Mochtar Riady Institute for Nanotechnology-Universitas Pelita Harapan; Eijkman Institute for Molecular Biology, National Research and Innovation Agency                                                         | Aksar C Lages; Amin Soebandrio; David Rustandi; Edison Johar; Febi Andriani; Filasita A Yudhaputri; Hidayat Trimarsanto; Irawan Yusuf; Iskandar Adnan; Ivet M Suriapranata; Juandy Jo; Khin Saw Myint; Lidwina Priliani; Lydia V. Panggalo; Muhammad Rezki Rasyak; Rinaldy Kusuma; Riska N Taufik; Rury M Wahyuni; Safarina G Malik; Sukma Oktavianthi; Tandry Meriyanti; Tri Shinta Kurniasih; Willy Agustine; Young O Larasati     |
| EPI_ISL_3957691, EPI_ISL_3957692, EPI_ISL_3957693, EPI_ISL_3957697, EPI_ISL_3957698, EPI_ISL_3957717, EPI_ISL_3957718, EPI_ISL_3957720, EPI_ISL_3957721                                                                                                                                                                                                                                               | see above                                      | Siloam Hospital Jambi (SHJB)                                                                                                                                                                                    | Aksar C Lages; Amin Soebandrio; David Rustandi; Edison Johar; Febi Andriani; Filasita A Yudhaputri; Hidayat Trimarsanto; Irawan Yusuf; Iskandar Adnan; Ivet M Suriapranata; Juandy Jo; Khin Saw Myint; Lidwina Priliani; Lydia V. Panggalo; Muhammad Rezki Rasyak; Rinaldy Kusuma; Riska N Taufik; Rury M Wahyuni; Safarina G Malik; Sukma Oktavianthi; Tandry Meriyanti; Tri Shinta Kurniasih; Willy Agustine; Young O Larasati     |
| EPI_ISL_3957744                                                                                                                                                                                                                                                                                                                                                                                       | Siloam Hospital Kelapa Dua (SHKD)              | Mochtar Riady Institute for Nanotechnology-Universitas Pelita Harapan; Eijkman Institute for Molecular Biology, National Research and Innovation Agency                                                         | Aksar C Lages; Amin Soebandrio; David Rustandi; Edison Johar; Febi Andriani; Filasita A Yudhaputri; Hidayat Trimarsanto; Irawan Yusuf; Iskandar Adnan; Ivet M Suriapranata; Juandy Jo; Khin Saw Myint; Lidwina Priliani; Lydia V. Panggalo; Muhammad Rezki Rasyak; Rinaldy Kusuma; Riska N Taufik; Rury M Wahyuni; Safarina G Malik; Sukma Oktavianthi; Tandry Meriyanti; Tri Shinta Kurniasih; Willy Agustine; Young O Larasati     |
| EPI_ISL_3957694, EPI_ISL_3957704, EPI_ISL_3957705, EPI_ISL_3957706, EPI_ISL_3957709, EPI_ISL_3957710, EPI_ISL_3957719, EPI_ISL_3957722, EPI_ISL_3957723, EPI_ISL_3957724, EPI_ISL_3957725, EPI_ISL_3957731, EPI_ISL_3957732, EPI_ISL_3957733, EPI_ISL_3957752, EPI_ISL_3957753, EPI_ISL_3957754, EPI_ISL_3957756, EPI_ISL_3957757, EPI_ISL_3957758, EPI_ISL_3957759, EPI_ISL_3957761, EPI_ISL_3957768 | see above                                      | Siloam Hospital Labuan Bajo (SHLB)                                                                                                                                                                              | Aksar C Lages; Amin Soebandrio; David Rustandi; Edison Johar; Febi Andriani; Filasita A Yudhaputri; Hidayat Trimarsanto; Irawan Yusuf; Iskandar Adnan; Ivet M Suriapranata; Juandy Jo; Khin Saw Myint; Lidwina Priliani; Lydia V. Panggalo; Muhammad Rezki Rasyak; Rinaldy Kusuma; Riska N Taufik; Rury M Wahyuni; Safarina G Malik; Sukma Oktavianthi; Tandry Meriyanti; Tri Shinta Kurniasih; Willy Agustine; Young O Larasati     |
| EPI_ISL_438546, EPI_ISL_438547, EPI_ISL_438548, EPI_ISL_438549                                                                                                                                                                                                                                                                                                                                        | Siloam Hospital Lippo Village                  | Mochtar Riady Institute for Nanotechnology, Universitas Pelita Harapan                                                                                                                                          | Aksar C Lages; David Rustandi; Febi Andriani; Irawan Yusuf; Ivet M Suriapranata; Riska N Taufik; Tri Shinta Kurniasih                                                                                                                                                                                                                                                                                                                |
| EPI_ISL_779383, EPI_ISL_779384, EPI_ISL_779385, EPI_ISL_779386, EPI_ISL_779387, EPI_ISL_779388, EPI_ISL_779389, EPI_ISL_779390, EPI_ISL_779391, EPI_ISL_779392, EPI_ISL_779393, EPI_ISL_779394, EPI_ISL_779395                                                                                                                                                                                        | see above                                      | Siloam Hospital Lippo Village                                                                                                                                                                                   | Aksar C Lages; David Rustandi; Febi Andriani; Irawan Yusuf; Ivet M Suriapranata; Rinaldy Kusuma; Riska N Taufik; Rury M Wahyuni; Tri Shinta Kurniasih; Young O Larasati                                                                                                                                                                                                                                                              |
| EPI_ISL_3957684, EPI_ISL_3957736, EPI_ISL_3957742, EPI_ISL_3957746, EPI_ISL_3957747, EPI_ISL_3957750, EPI_ISL_3957755, EPI_ISL_3957772, EPI_ISL_3957773, EPI_ISL_4037168, EPI_ISL_4037172                                                                                                                                                                                                             | see above                                      | Siloam Hospital Lippo Village (SHLV)                                                                                                                                                                            | Aksar C Lages; Amin Soebandrio; David Rustandi; Edison Johar; Febi Andriani; Filasita A Yudhaputri; Hidayat Trimarsanto; Irawan Yusuf; Iskandar Adnan; Ivet M Suriapranata; Juandy Jo; Khin Saw Myint; Lidwina Priliani; Lydia V. Panggalo; Muhammad Rezki Rasyak; Rinaldy Kusuma; Riska N Taufik; Rury M Wahyuni; Safarina G Malik; Sukma Oktavianthi; Tandry Meriyanti; Tri Shinta Kurniasih; Willy Agustine; Young O Larasati     |
| EPI_ISL_3957685, EPI_ISL_3957686                                                                                                                                                                                                                                                                                                                                                                      | Siloam Hospital Mampang (SHMA)                 | Mochtar Riady Institute for Nanotechnology-Universitas Pelita Harapan; Eijkman Institute for Molecular Biology, National Research and Innovation Agency                                                         | Aksar C Lages; Amin Soebandrio; David Rustandi; Edison Johar; Febi Andriani; Filasita A Yudhaputri; Hidayat Trimarsanto; Irawan Yusuf; Iskandar Adnan; Ivet M Suriapranata; Juandy Jo; Khin Saw Myint; Lidwina Priliani; Lydia V. Panggalo; Muhammad Rezki Rasyak; Rinaldy Kusuma; Riska N Taufik; Rury M Wahyuni; Safarina G Malik; Sukma Oktavianthi; Tandry Meriyanti; Tri Shinta Kurniasih; Willy Agustine; Young O Larasati     |
| EPI_ISL_3957681, EPI_ISL_3957682, EPI_ISL_3957689, EPI_ISL_3957690                                                                                                                                                                                                                                                                                                                                    | Siloam Hospital Manado (SHMN)                  | Mochtar Riady Institute for Nanotechnology-Universitas Pelita Harapan; Eijkman Institute for Molecular Biology, National Research and Innovation Agency                                                         | Aksar C Lages; Amin Soebandrio; David Rustandi; Edison Johar; Febi Andriani; Filasita A Yudhaputri; Hidayat Trimarsanto; Irawan Yusuf; Iskandar Adnan; Ivet M Suriapranata; Juandy Jo; Khin Saw Myint; Lidwina Priliani; Lydia V. Panggalo; Muhammad Rezki Rasyak; Rinaldy Kusuma; Riska N Taufik; Rury M Wahyuni; Safarina G Malik; Sukma Oktavianthi; Tandry Meriyanti; Tri Shinta Kurniasih; Willy Agustine; Young O Larasati     |
| EPI_ISL_3957687, EPI_ISL_3957688, EPI_ISL_3957712, EPI_ISL_4037167                                                                                                                                                                                                                                                                                                                                    | Siloam Hospital Paal Dua (SHPD)                | Mochtar Riady Institute for Nanotechnology-Universitas Pelita Harapan; Eijkman Institute for Molecular Biology, National Research and Innovation Agency                                                         | Aksar C Lages; Amin Soebandrio; David Rustandi; Edison Johar; Febi Andriani; Filasita A Yudhaputri; Hidayat Trimarsanto; Irawan Yusuf; Iskandar Adnan; Ivet M Suriapranata; Juandy Jo; Khin Saw Myint; Lidwina Priliani; Lydia V. Panggalo; Muhammad Rezki Rasyak; Rinaldy Kusuma; Riska N Taufik; Rury M Wahyuni; Safarina G Malik; Sukma Oktavianthi; Tandry Meriyanti; Tri Shinta Kurniasih; Willy Agustine; Young O Larasati     |
| EPI_ISL_3957683, EPI_ISL_3957700, EPI_ISL_3957701, EPI_ISL_3957702, EPI_ISL_3957711, EPI_ISL_3957714, EPI_ISL_3957715, EPI_ISL_3957727, EPI_ISL_3957728, EPI_ISL_3957729, EPI_ISL_3957735, EPI_ISL_3957738, EPI_ISL_3957739, EPI_ISL_3957745, EPI_ISL_3957765, EPI_ISL_3957767, EPI_ISL_3957771, EPI_ISL_4037169, EPI_ISL_4037170, EPI_ISL_4037171, EPI_ISL_4037173                                   | see above                                      | Siloam Hospital Palangkaraya (SHPR)                                                                                                                                                                             | Aksar C Lages; Amin Soebandrio; David Rustandi; Edison Johar; Febi Andriani; Filasita A Yudhaputri; Hidayat Trimarsanto; Irawan Yusuf; Iskandar Adnan; Ivet M Suriapranata; Juandy Jo; Khin Saw Myint; Lidwina Priliani; Lydia V. Panggalo; Muhammad Rezki Rasyak; Rinaldy Kusuma; Riska N Taufik; Rury M Wahyuni; Safarina G Malik; Sukma Oktavianthi; Tandry Meriyanti; Tri Shinta Kurniasih; Willy Agustine; Young O Larasati     |
| EPI_ISL_3957695, EPI_ISL_3957696, EPI_ISL_3957699, EPI_ISL_3957703, EPI_ISL_3957713, EPI_ISL_3957716, EPI_ISL_3957730, EPI_ISL_3957737, EPI_ISL_3957740, EPI_ISL_3957741, EPI_ISL_3957743, EPI_ISL_3957748, EPI_ISL_3957751, EPI_ISL_3957760, EPI_ISL_3957762, EPI_ISL_3957766, EPI_ISL_3957769, EPI_ISL_3957770                                                                                      | see above                                      | Siloam Hospital Purwakarta (SHPW)                                                                                                                                                                               | Aksar C Lages; Amin Soebandrio; David Rustandi; Edison Johar; Febi Andriani; Filasita A Yudhaputri; Hidayat Trimarsanto; Irawan Yusuf; Iskandar Adnan; Ivet M Suriapranata; Juandy Jo; Khin Saw Myint; Lidwina Priliani; Lydia V. Panggalo; Muhammad Rezki Rasyak; Rinaldy Kusuma; Riska N Taufik; Rury M Wahyuni; Safarina G Malik; Sukma Oktavianthi; Tandry Meriyanti; Tri Shinta Kurniasih; Willy Agustine; Young O Larasati     |
| EPI_ISL_437187                                                                                                                                                                                                                                                                                                                                                                                        | Siloam Hospitals                               | Institute of Tropical Disease, Universitas Airlangga                                                                                                                                                            | Aldise M Nastri; Gatot Soegiarto; Jezy R Dewantari; Kazufumi Shimizu; Krisnoadi Rahardjo; Laksmi Wulandari; Maria I Lusida; Maria M Padmidevi; Mitsuhiro Nishimura; Resti Y Meliana; Retno A Setyoningrum; Rima R Prasetya; Soetjipto; Yasuko Mori; Yokho K Shimizu                                                                                                                                                                  |

|                                                                                                                                                                                                                                                                                                                                                                                                            |                                                  |                                                                                                                                                                                                               |                                                                                                                                                                                                                                                                                                                                                                                                                                                                                                |
|------------------------------------------------------------------------------------------------------------------------------------------------------------------------------------------------------------------------------------------------------------------------------------------------------------------------------------------------------------------------------------------------------------|--------------------------------------------------|---------------------------------------------------------------------------------------------------------------------------------------------------------------------------------------------------------------|------------------------------------------------------------------------------------------------------------------------------------------------------------------------------------------------------------------------------------------------------------------------------------------------------------------------------------------------------------------------------------------------------------------------------------------------------------------------------------------------|
| EPI_ISL_1265173                                                                                                                                                                                                                                                                                                                                                                                            | Siloam Hospitals Yogyakarta                      | National Institute of Health Research and Development                                                                                                                                                         | Arie Ardiansyah Nugraha; Hana Apsari Pawestri; Hartanti Dian Ikawati; Kartika Dewi Puspa; Krisna Pangesti; Nelly Puspandari; Subangkit; Vivi Setiawaty                                                                                                                                                                                                                                                                                                                                         |
| EPI_ISL_759957, EPI_ISL_877419, EPI_ISL_877460, EPI_ISL_877538, EPI_ISL_882771, EPI_ISL_888591, EPI_ISL_888593, EPI_ISL_956278, EPI_ISL_956279, EPI_ISL_956281, EPI_ISL_956313, EPI_ISL_956315, EPI_ISL_1159383, EPI_ISL_1159386, EPI_ISL_1165067, EPI_ISL_1165069, EPI_ISL_1165070, EPI_ISL_1789113, EPI_ISL_1789114, EPI_ISL_1789115, EPI_ISL_2284874, EPI_ISL_2284883, EPI_ISL_4056018, EPI_ISL_4742355 |                                                  |                                                                                                                                                                                                               |                                                                                                                                                                                                                                                                                                                                                                                                                                                                                                |
| see above                                                                                                                                                                                                                                                                                                                                                                                                  | Siti Khodijah Hospital                           | Institute of Tropical Disease, Universitas Airlangga                                                                                                                                                          | Aldise M Nastri; Gatot Soegiarto; Jezy R Dewantari; Kazufumi Shimizu; Kohar Hari Santoso; Krisnoadi Rahardjo; Laksmi Wulandari; Maria I Lusida; Muhammad Hamdan; Resti Yudhawati; Rima R Prasetya; Soetjipto; Yasuko Mori                                                                                                                                                                                                                                                                      |
| EPI_ISL_2931772                                                                                                                                                                                                                                                                                                                                                                                            | SmartCO Lab                                      | National Institute of Health Research and Development                                                                                                                                                         | : Arie Ardiansyah Nugraha; Hana Apsari Pawestri; Hartanti Dian Ikawati; Kartika Dewi Puspa; Krisna Pangesti; Nelly Puspandari; Subangkit; Triyani Soekarso; Vivi Setiawaty                                                                                                                                                                                                                                                                                                                     |
| EPI_ISL_2382413, EPI_ISL_2382414, EPI_ISL_2382415, EPI_ISL_3138802, EPI_ISL_3138803                                                                                                                                                                                                                                                                                                                        | Smartco Lab                                      | National Institute of Health Research and Development                                                                                                                                                         | Arie Ardiansyah Nugraha; Fajar Nur Sulistiyohadi; Hana Apsari Pawestri; Hartanti Dian Ikawati; Kartika Dewi Puspa; Krisna Pangesti; Nelly Puspandari; Subangkit; Triyani Soekarso; Vivi Setiawaty                                                                                                                                                                                                                                                                                              |
| EPI_ISL_872897                                                                                                                                                                                                                                                                                                                                                                                             | Stem Cell Research and Development Center        | Stem Cell Research and Development Center                                                                                                                                                                     | Aristika Dinaryanti; Deya Karsari; Eryk Hendrianto; Igo Syaiful Ihsan; Naimah Putri; Nora Entanti; Purwati                                                                                                                                                                                                                                                                                                                                                                                     |
| EPI_ISL_1341802, EPI_ISL_1341907, EPI_ISL_1343818, EPI_ISL_1398267, EPI_ISL_1398355, EPI_ISL_1398359, EPI_ISL_1398375, EPI_ISL_1398561, EPI_ISL_1398924, EPI_ISL_1398927, EPI_ISL_1398930, EPI_ISL_1398981, EPI_ISL_1615590, EPI_ISL_1615620, EPI_ISL_1634477, EPI_ISL_1660417, EPI_ISL_1660420                                                                                                            |                                                  |                                                                                                                                                                                                               |                                                                                                                                                                                                                                                                                                                                                                                                                                                                                                |
| see above                                                                                                                                                                                                                                                                                                                                                                                                  | Subang Public Health                             | West Java Health Laboratory; School of Life Sciences and Technology, Institut Teknologi Bandung                                                                                                               | Aulia Saraswati Wicaksono; Azzania Fibriani; Cut Nur Cinthia Alamanda; Ema Rahmawati; Isak Solihin; Kamila Tania; Karimatu Khoirunnisa; Miftahul Faridi; Rifky Waluyajati Rachman; Rini Robiani; Ryan Bayusantika Ristandi                                                                                                                                                                                                                                                                     |
| EPI_ISL_747241                                                                                                                                                                                                                                                                                                                                                                                             | Subang Public Health Office                      | West Java Health Laboratory; School of Life Sciences and Technology, Institut Teknologi Bandung                                                                                                               | Azzania Fibriani; Cut Nur Cinthia Alamanda; Ema Rahmawati; Isak Solihin; Karimatu Khoirunnisa; Miftahul Faridi; Rifky Waluyajati Rachman; Rini Robiani; Ryan Bayusantika Ristandi                                                                                                                                                                                                                                                                                                              |
| EPI_ISL_747235, EPI_ISL_1341801                                                                                                                                                                                                                                                                                                                                                                            | Sukabumi Health Laboratory                       | West Java Health Laboratory; School of Life Sciences and Technology, Institut Teknologi Bandung                                                                                                               | Azzania Fibriani; Cut Nur Cinthia Alamanda; Ema Rahmawati; Isak Solihin; Karimatu Khoirunnisa; Miftahul Faridi; Rifky Waluyajati Rachman; Rini Robiani; Ryan Bayusantika Ristandi                                                                                                                                                                                                                                                                                                              |
| EPI_ISL_747236, EPI_ISL_1398374                                                                                                                                                                                                                                                                                                                                                                            | Sukabumi Public Health                           | West Java Health Laboratory; School of Life Sciences and Technology, Institut Teknologi Bandung                                                                                                               | Azzania Fibriani; Cut Nur Cinthia Alamanda; Ema Rahmawati; Isak Solihin; Kamila Tania; Karimatu Khoirunnisa; Miftahul Faridi; Rifky Waluyajati Rachman; Rini Robiani; Ryan Bayusantika Ristandi                                                                                                                                                                                                                                                                                                |
| EPI_ISL_1398365, EPI_ISL_1398980, EPI_ISL_1615589, EPI_ISL_1615621                                                                                                                                                                                                                                                                                                                                         | Sumedang Public Health                           | West Java Health Laboratory; School of Life Sciences and Technology, Institut Teknologi Bandung                                                                                                               | Aulia Saraswati Wicaksono; Azzania Fibriani; Cut Nur Cinthia Alamanda; Ema Rahmawati; Isak Solihin; Kamila Tania; Karimatu Khoirunnisa; Miftahul Faridi; Rifky Waluyajati Rachman; Rini Robiani; Ryan Bayusantika Ristandi                                                                                                                                                                                                                                                                     |
| EPI_ISL_529719                                                                                                                                                                                                                                                                                                                                                                                             | Sumedang Regional General Hospital               | Laboratorium Kesehatan Provinsi Jawa Barat; School of Life Sciences and Technology & School of Pharmacy-Institut Teknologi Bandung; Molecular Genetics Laboratory-Faculty of Medicine-Universitas Padjadjaran | Adelina Khristiani Rahayu; Agung Eru Wibowo; Azzania Fibriani; Catur Riani; Cut Nur Cinthia Alamanda; Ema Rahmawati; Gusti Ayu Prani Pradani; Hammam Riza; Hesti Lina Wiraswati; Husna Nugrahapraja; Irvan Faizal; Lia Faridah; Marselina Irasonia Tan; Rifky Waluyajati Rachman; Ryan Bayusantika Ristandi; Savira Ekawardhani; Sony Solistia Wirawan; Tarwadi; Yulia Sribudiani                                                                                                              |
| EPI_ISL_1335886                                                                                                                                                                                                                                                                                                                                                                                            | Sundari Hospital Medan                           | Faculty of Medicine, Universitas Sumatera Utara; Institute of Tropical Disease, Universitas Airlangga                                                                                                         | Aldise M Nastri; Franciscus Ginting; Inke N D Lubis; Irbah R Nainggolan; Jezy R Dewantari; Kazufumi Shimizu; Krisnoadi Rahardjo; Maria I Lusida; Meliani; Mirzan Hasbuan; Muhammad Ichwan; R Andika D Cahyadi; R Lia Kusumawati; Ramadhan Bestari; Rima R Prasetya; Soetjipto; Yasuko Mori                                                                                                                                                                                                     |
| EPI_ISL_2510687, EPI_ISL_2570808, EPI_ISL_2570809, EPI_ISL_2570811, EPI_ISL_2617435, EPI_ISL_2617436, EPI_ISL_2617437, EPI_ISL_2617438, EPI_ISL_2693669, EPI_ISL_2693670                                                                                                                                                                                                                                   |                                                  |                                                                                                                                                                                                               |                                                                                                                                                                                                                                                                                                                                                                                                                                                                                                |
| see above                                                                                                                                                                                                                                                                                                                                                                                                  | Surabaya Health Office                           | Institute of Tropical Disease, Universitas Airlangga                                                                                                                                                          | Aldise M Nastri; Febria Rachmanita; Gatot Soegiarto; Herlin Ferliana; Jezy R Dewantari; Kazufumi Shimizu; Krisnoadi Rahardjo; Laksmi Wulandari; Maria I Lusida; Resti Yudhawati; Rima R Prasetya; Soetjipto; Yasuko Mori                                                                                                                                                                                                                                                                       |
| EPI_ISL_759960, EPI_ISL_1159381                                                                                                                                                                                                                                                                                                                                                                            | Surabaya Public Health Office                    | Institute of Tropical Disease, Universitas Airlangga                                                                                                                                                          | Aldise M Nastri; Febria Rachmanita; Gatot Soegiarto; Jezy R Dewantari; Kazufumi Shimizu; Krisnoadi Rahardjo; Laksmi Wulandari; Maria I Lusida; Resti Yudhawati; Rima R Prasetya; Soetjipto; Yasuko Mori                                                                                                                                                                                                                                                                                        |
| EPI_ISL_1969242, EPI_ISL_1969243                                                                                                                                                                                                                                                                                                                                                                           | Swissbel Hotel Airport                           | National Institute of Health Research and Development                                                                                                                                                         | Arie Ardiansyah Nugraha; Hana Apsari Pawestri; Hartanti Dian Ikawati; Kartika Dewi Puspa; Krisna Pangesti; Nelly Puspandari; Subangkit; Triyani Soekarso; Vivi Setiawaty                                                                                                                                                                                                                                                                                                                       |
| EPI_ISL_3466992, EPI_ISL_3467002, EPI_ISL_3467007, EPI_ISL_3467014, EPI_ISL_3550653, EPI_ISL_3550654                                                                                                                                                                                                                                                                                                       | Syiah Kuala University                           | Eijkman Institute for Molecular Biology, National Research and Innovation Agency; Syiah Kuala University                                                                                                      | Agung Pranata; Amin Soebandrio; Edison Johar; Filisasta A Yudhaputri; Hamdani; Harapan Harapan; Hidayat Trimarsanto; Ichsan Ichsan; Irvansyah; Iskandar Adnan; Jessica R. Saragih; Khin Saw Myint; Kurnia Fitri Jamil; Lidwina Priliati; Lydia V. Panggalo; Maimun Syukri; Mudatsir Mudatsir; Muhammad Rezki Rasyak; Razali Thalib; Rudi Kurniawan; Safarina G Malik; Samsul Rizal; Sarwo Edhy S; Sukma Oktavianthi; Willy Agustine                                                            |
| EPI_ISL_902917, EPI_ISL_902918, EPI_ISL_902919, EPI_ISL_902921, EPI_ISL_902922, EPI_ISL_902924, EPI_ISL_911633, EPI_ISL_911675, EPI_ISL_911708, EPI_ISL_911732, EPI_ISL_911750, EPI_ISL_1250844, EPI_ISL_1250845, EPI_ISL_1250846, EPI_ISL_1250851, EPI_ISL_1250859, EPI_ISL_2886170, EPI_ISL_2886171, EPI_ISL_2886174, EPI_ISL_2886177, EPI_ISL_2886178, EPI_ISL_2886179                                  |                                                  |                                                                                                                                                                                                               |                                                                                                                                                                                                                                                                                                                                                                                                                                                                                                |
| see above                                                                                                                                                                                                                                                                                                                                                                                                  | Tanjungpura University Hospital                  | Tanjungpura University Hospital                                                                                                                                                                               | Ambar Rialita; Andriani; Arie Ardiansyah Nugraha; Arif Wicaksono; Delima Fajar Liana; Eka Ardiani Putri; Eka Ardiani Putri EA; Hana Apsari Pawestri; Hartanti Dian Ikawati; Helmi Sastrriawan; Kahtan MI; Kartika Dewi Puspa; Liana DF; Mahyardin; Muhammad Ibnu Kahtan; Muhammad Kahtan; Novianry V; Puji Astuti P; Putri EA; Rialita A; Rini Andriani; Sastrriawan W; Shofiyyah SS Astuti P; Sofi Siti Shofiyyah; Virhan Novianry; Vivi Setiawaty; Willy Handoko; Windarti W; Wiwik Windarti |
| EPI_ISL_4885285, EPI_ISL_4885286, EPI_ISL_4885287, EPI_ISL_4885288, EPI_ISL_4885289, EPI_ISL_4885290, EPI_ISL_4885291, EPI_ISL_4885292, EPI_ISL_4885293, EPI_ISL_4885294, EPI_ISL_4885295, EPI_ISL_4885296, EPI_ISL_4885297, EPI_ISL_4885298, EPI_ISL_4885299, EPI_ISL_4885300, EPI_ISL_4885301, EPI_ISL_4885302                                                                                           |                                                  |                                                                                                                                                                                                               |                                                                                                                                                                                                                                                                                                                                                                                                                                                                                                |
| see above                                                                                                                                                                                                                                                                                                                                                                                                  | Tasikmalaya Public Health                        | West Java Health Laboratory                                                                                                                                                                                   | Azzania Fibriani; Cut Nur Cinthia Alamanda; Ema Rahmawati; Isak Solihin; Karimatu Khoirunnisa; Miftahul Faridi; Rifky Waluyajati Rachman; Rini Robiani; Ryan Bayusantika Ristandi                                                                                                                                                                                                                                                                                                              |
| EPI_ISL_1341799, EPI_ISL_1341800, EPI_ISL_1634470                                                                                                                                                                                                                                                                                                                                                          | Tasikmalaya Public Health                        | West Java Health Laboratory; School of Life Sciences and Technology, Institut Teknologi Bandung                                                                                                               | Aulia Saraswati Wicaksono; Azzania Fibriani; Cut Nur Cinthia Alamanda; Ema Rahmawati; Isak Solihin; Karimatu Khoirunnisa; Miftahul Faridi; Rifky Waluyajati Rachman; Rini Robiani; Ryan Bayusantika Ristandi                                                                                                                                                                                                                                                                                   |
| EPI_ISL_576385                                                                                                                                                                                                                                                                                                                                                                                             | Tirta Medical Center Angsana, Banjarmasin Kalsel | National Institute of Health Research and Development                                                                                                                                                         | AA; HA; HD; Ikawati; KD; KNA; Nugraha; Paisal; Pangesti; Pawestri; Puspa; Setiawaty; Soekarso; Subangkit; T; V                                                                                                                                                                                                                                                                                                                                                                                 |
| EPI_ISL_1020194                                                                                                                                                                                                                                                                                                                                                                                            | UMMI Hospital, Bogor, West Java                  | Biosafety Level-3 Laboratory, Indonesian Institute of Sciences (LIPI)                                                                                                                                         | Anggia Prasetyoputri; Gita Syahputra; Isa Nuryana; Ratih Asmana Ningrum; Sri Swasthikawati; Sugiyono Saputra; Syam Budi Iryanto                                                                                                                                                                                                                                                                                                                                                                |
| EPI_ISL_4730613, EPI_ISL_4730614, EPI_ISL_4730615, EPI_ISL_4730616, EPI_ISL_4730617, EPI_ISL_4730618, EPI_ISL_4730619, EPI_ISL_4730620, EPI_ISL_4730621, EPI_ISL_5022880, EPI_ISL_5022881, EPI_ISL_5022882, EPI_ISL_5022883, EPI_ISL_5022884, EPI_ISL_5022885, EPI_ISL_5022886, EPI_ISL_5022887, EPI_ISL_5022888, EPI_ISL_5022889, EPI_ISL_5022891, EPI_ISL_5022892, EPI_ISL_5022893, EPI_ISL_5022956      |                                                  |                                                                                                                                                                                                               |                                                                                                                                                                                                                                                                                                                                                                                                                                                                                                |
| see above                                                                                                                                                                                                                                                                                                                                                                                                  | UPT LABKES DINKES SULTENG                        | National Institute of Health Research and Development                                                                                                                                                         | Arie Ardiansyah Nugraha; Fajar Nur Sulistiyohadi; Hana Apsari Pawestri; Hartanti Dian Ikawati; Kartika Dewi Puspa; Krisna Pangesti; Nelly Puspandari; Subangkit; Triyani Soekarso; Vivi Setiawaty                                                                                                                                                                                                                                                                                              |
| EPI_ISL_2047530                                                                                                                                                                                                                                                                                                                                                                                            | UPT LabKes Sulawesi Tengah                       | National Institute of Health Research and Development                                                                                                                                                         | Arie Ardiansyah Nugraha; Hana Apsari Pawestri; Hartanti Dian Ikawati; Kartika Dewi Puspa; Krisna Pangesti; Nelly Puspandari; Subangkit; Triyani Soekarso; Vivi Setiawaty                                                                                                                                                                                                                                                                                                                       |
| EPI_ISL_2854760, EPI_ISL_2854761, EPI_ISL_2868933, EPI_ISL_2868934, EPI_ISL_2868936                                                                                                                                                                                                                                                                                                                        | UPTD Balai LABKES Kep. Bangka Belitung           | National Institute of Health Research and Development                                                                                                                                                         | Arie Ardiansyah Nugraha; Hana Apsari Pawestri; Hartanti Dian Ikawati; Kartika Dewi Puspa; Krisna Pangesti; Nelly Puspandari; Subangkit; Triyani Soekarso; Vivi Setiawaty                                                                                                                                                                                                                                                                                                                       |
| EPI_ISL_5022927, EPI_ISL_5022928, EPI_ISL_5022929, EPI_ISL_5022930, EPI_ISL_5022931, EPI_ISL_5022932, EPI_ISL_5022933, EPI_ISL_5022934, EPI_ISL_5022935, EPI_ISL_5022936                                                                                                                                                                                                                                   |                                                  |                                                                                                                                                                                                               |                                                                                                                                                                                                                                                                                                                                                                                                                                                                                                |
| see above                                                                                                                                                                                                                                                                                                                                                                                                  | UPTD LABKESDA Kota Baru Jambi                    | National Institute of Health Research and Development                                                                                                                                                         | Arie Ardiansyah Nugraha; Fajar Nur Sulistiyohadi; Hana Apsari Pawestri; Hartanti Dian Ikawati; Kartika Dewi Puspa; Krisna Pangesti; Nelly Puspandari; Subangkit; Triyani Soekarso; Vivi Setiawaty                                                                                                                                                                                                                                                                                              |
| EPI_ISL_2854705, EPI_ISL_2854706, EPI_ISL_2854707                                                                                                                                                                                                                                                                                                                                                          | UPTD LABKESDA Kota Samarinda                     | National Institute of Health Research and Development                                                                                                                                                         | Arie Ardiansyah Nugraha; Hana Apsari Pawestri; Hartanti Dian Ikawati; Kartika Dewi Puspa; Krisna Pangesti; Nelly Puspandari; Subangkit; Triyani Soekarso; Vivi Setiawaty                                                                                                                                                                                                                                                                                                                       |
| EPI_ISL_3086878                                                                                                                                                                                                                                                                                                                                                                                            | UPTD Labkesda Depok                              | Indonesian Institute of Sciences (LIPI) and Laboratorium Kesehatan Daerah (Labkesda) Kota Depok                                                                                                               | Anik B. Dharmayanthi; Elin Herliana; Erwin F. Hasrianda; Harto W. Tamara; Herjuno A. Nugroho; Idris; Kania R. Astuti; Kurniyawati; Listiana Oktavia; Masrukhin; Ratih A. Ningrum; Ruby Setiawan; Sugeng Suhadi; Syaiful Rizal; Syam B. Iryanto; Yuliawati                                                                                                                                                                                                                                      |
| EPI_ISL_2631442, EPI_ISL_2631443, EPI_ISL_2631444, EPI_ISL_2631445, EPI_ISL_2631446, EPI_ISL_2631447, EPI_ISL_2631448, EPI_ISL_2631449, EPI_ISL_2631450, EPI_ISL_2631451, EPI_ISL_2631452, EPI_ISL_2631453                                                                                                                                                                                                 |                                                  |                                                                                                                                                                                                               |                                                                                                                                                                                                                                                                                                                                                                                                                                                                                                |
| see above                                                                                                                                                                                                                                                                                                                                                                                                  | UPTD Labkesda Karawang                           | Indonesian Institute of Sciences (LIPI)/National Agency of Research and Innovation (BRIN) and National Institute of Health Research and Development (NIHRD)                                                   | Andri Wardiana; Anggia Prasetyoputri; Anik B. Dharmayanthi; Gita Syahputra; Herjuno A. Nugroho; Idris; Indriawati; Isa Nuryana; Listiana Oktavia; Puspita Lisdianti; Ratih A. Ningrum; Sri Swasthikawati; Subangkit; Sugiyono Saputra; Syam B. Iryanto; Vivi Setiawaty Puspita Lisdianti; Yayuk Sri Rahayu; Yuliawati                                                                                                                                                                          |
| EPI_ISL_3086869, EPI_ISL_3086876, EPI_ISL_3086877                                                                                                                                                                                                                                                                                                                                                          | UPTD Puskesmas Cimanggis                         | Indonesian Institute of Sciences (LIPI) and Laboratorium Kesehatan Daerah (Labkesda) Kota Depok                                                                                                               | Andri Wardiana; Elin Herliana; Erwin F. Hasrianda; Harto W. Tamara; Herjuno A. Nugroho; Idris; Kania R. Astuti; Kurniyawati; Listiana Oktavia; Masrukhin; Ratih A. Ningrum; Ruby Setiawan; Sugeng Suhadi; Sugiyono Saputra; Syaiful Rizal; Syam B. Iryanto; Yuliawati                                                                                                                                                                                                                          |
| EPI_ISL_4090571, EPI_ISL_4090572, EPI_ISL_4090573, EPI_ISL_4090574, EPI_ISL_5022949                                                                                                                                                                                                                                                                                                                        | UPTD Puskesmas Kab Tabanan                       | National Institute of Health Research and Development                                                                                                                                                         | Arie Ardiansyah Nugraha; Fajar Nur Sulistiyohadi; Hana Apsari Pawestri; Hartanti Dian Ikawati; Kartika Dewi Puspa; Krisna Pangesti; Nelly Puspandari; Subangkit; Triyani Soekarso; Vivi Setiawaty                                                                                                                                                                                                                                                                                              |
| EPI_ISL_3086865, EPI_ISL_3086867, EPI_ISL_3086873, EPI_ISL_3086879                                                                                                                                                                                                                                                                                                                                         | UPTD Puskesmas Limo                              | Indonesian Institute of Sciences (LIPI) and Laboratorium Kesehatan Daerah (Labkesda) Kota Depok                                                                                                               | Anggia Prasetyoputri; Anik B. Dharmayanthi; Elin Herliana; Erwin F. Hasrianda; Harto W. Tamara; Herjuno A. Nugroho; Idris; Kania R. Astuti; Kurniyawati; Listiana Oktavia; Masrukhin; Puspita Lisdianti; Ratih A. Ningrum; Ruby Setiawan; Sugeng Suhadi; Syaiful Rizal; Syam B. Iryanto; Yuliawati                                                                                                                                                                                             |
| EPI_ISL_3086866, EPI_ISL_3086871, EPI_ISL_3086872, EPI_ISL_3086874                                                                                                                                                                                                                                                                                                                                         | UPTD Puskesmas Mampang                           | Indonesian Institute of Sciences (LIPI) and Laboratorium Kesehatan Daerah (Labkesda) Kota Depok                                                                                                               | Anggia Prasetyoputri; Elin Herliana; Erwin F. Hasrianda; Harto W. Tamara; Herjuno A. Nugroho; Idris; Kania R. Astuti; Kurniyawati; Listiana Oktavia; Masrukhin; Puspita Lisdianti; Ratih A. Ningrum; Ruby Setiawan; Sugeng Suhadi; Sugiyono Saputra; Syaiful Rizal; Syam B. Iryanto; Yuliawati                                                                                                                                                                                                 |
| EPI_ISL_3086868                                                                                                                                                                                                                                                                                                                                                                                            | UPTD Puskesmas Pondok Sukmajaya                  | Indonesian Institute of Sciences (LIPI) and Laboratorium Kesehatan Daerah (Labkesda) Kota Depok                                                                                                               | Andri Wardiana; Elin Herliana; Erwin F. Hasrianda; Harto W. Tamara; Herjuno A. Nugroho; Idris; Kania R. Astuti; Kurniyawati; Listiana Oktavia; Masrukhin; Ratih A. Ningrum; Ruby Setiawan; Sugeng Suhadi; Syaiful Rizal; Syam B. Iryanto; Yuliawati                                                                                                                                                                                                                                            |
| EPI_ISL_3086870                                                                                                                                                                                                                                                                                                                                                                                            | UPTD Puskesmas Sawangan                          | Indonesian Institute of Sciences (LIPI) and Laboratorium Kesehatan Daerah (Labkesda) Kota Depok                                                                                                               | Andri Wardiana; Elin Herliana; Erwin F. Hasrianda; Harto W. Tamara; Herjuno A. Nugroho; Idris; Kania R. Astuti; Kurniyawati; Listiana Oktavia; Masrukhin; Ratih A. Ningrum; Ruby Setiawan; Sugeng Suhadi; Syaiful Rizal; Syam B. Iryanto; Yuliawati                                                                                                                                                                                                                                            |

|                                                                                                                                                                                                                                                                                                                                                                                                                                                                                                                                                                                                                                                                                                                                                                                                                                                                                                                    |                                |                                                                                                 |                                                                                                                                                                                                                                                                                                                                             |
|--------------------------------------------------------------------------------------------------------------------------------------------------------------------------------------------------------------------------------------------------------------------------------------------------------------------------------------------------------------------------------------------------------------------------------------------------------------------------------------------------------------------------------------------------------------------------------------------------------------------------------------------------------------------------------------------------------------------------------------------------------------------------------------------------------------------------------------------------------------------------------------------------------------------|--------------------------------|-------------------------------------------------------------------------------------------------|---------------------------------------------------------------------------------------------------------------------------------------------------------------------------------------------------------------------------------------------------------------------------------------------------------------------------------------------|
| EPI_ISL_3086875                                                                                                                                                                                                                                                                                                                                                                                                                                                                                                                                                                                                                                                                                                                                                                                                                                                                                                    | UPTD Puskesmas Tanah Baru      | Indonesian Institute of Sciences (LIPI) and Laboratorium Kesehatan Daerah (Labkesda) Kota Depok | Elin Herliana; Erwin F. Hasrianda; Harto W. Tamara; Herjuno A. Nugroho; Idris; Kania R. Astuti; Kurniawati; Listiana Oktavia; Masrukhin; Ratih A. Ningrum; Ruby Setiawan; Sugeng Suhadi; Sugiyono Saputra; Syaiful Rizal; Syam B. Iryanto; Yuliawati                                                                                        |
| EPI_ISL_2854708, EPI_ISL_2854709, EPI_ISL_2854710                                                                                                                                                                                                                                                                                                                                                                                                                                                                                                                                                                                                                                                                                                                                                                                                                                                                  | UPTDLABKESDA Kota Depok        | National Institute of Health Research and Development                                           | Arie Ardiansyah Nugraha; Hana Apsari Pawestri; Hartanti Dian Ikawati; Kartika Dewi Puspa; Krisna Pangesti; Nelly Puspandari; Subangkit; Triyani Soekarso; Vivi Setiawaty                                                                                                                                                                    |
| EPI_ISL_2614723                                                                                                                                                                                                                                                                                                                                                                                                                                                                                                                                                                                                                                                                                                                                                                                                                                                                                                    | US Embassy Health Unit         | Eijkman Institute for Molecular Biology, National Research and Innovation Agency                | Amin Soebandrio; Edison Johar; Frilasita A Yudhaputri; Hidayat Trimarsanto; Iskandar Adnan; Khin Saw Myint; Lidwina Priliani; Lydia V. Panggalo; Muhammad Rezki Rasyak; Safarina G Malik; Sukma Oktavianthi; Willy Agustine                                                                                                                 |
| EPI_ISL_458082, EPI_ISL_529962, EPI_ISL_529963, EPI_ISL_759958, EPI_ISL_759961, EPI_ISL_956270, EPI_ISL_956273, EPI_ISL_4056013, EPI_ISL_4056019                                                                                                                                                                                                                                                                                                                                                                                                                                                                                                                                                                                                                                                                                                                                                                   | see above                      | Institute of Tropical Disease, Universitas Airlangga                                            | Aldise M Nastri; Gatot Soegiarto; Jezzy R Dewantari; Kazufumi Shimizu; Kohar Hari Santoso; Krisnoadi Rahardjo; Laksmi Wulandari; Maria I Lusida; Mitsuhiko Nishimura; Nasronudin; Resti Yudhawati; Retno A Setyoningrum; Rima R Prasetya; Soetjpto; Yasuko Mori; Yokko K Shimizu                                                            |
| EPI_ISL_1196279, EPI_ISL_1196280, EPI_ISL_1196281, EPI_ISL_1196303, EPI_ISL_1196304, EPI_ISL_3374593                                                                                                                                                                                                                                                                                                                                                                                                                                                                                                                                                                                                                                                                                                                                                                                                               | Universitas Indonesia Hospital | Faculty of Medicine, Universitas Indonesia                                                      | Anis Karuniawati; Ardiana Kusumaningrum; Ari Fahrial Syam; Astuti Giantini; Aulia Reski Widyaningrum; Badriul Hegar; Budi Wiweko; Dimas Seto; Doni Usman; Dwiana Ocviyanti; Fadilah; Ferdi Anda Sitepu; Irandi Putra Pratomo; Khaerunissa Anbar Istiad; Linda Erlina; Putra Mahanaïm Tampubolon; Rafika Indah Paramita                      |
| EPI_ISL_4508277, EPI_ISL_4508278, EPI_ISL_4508279, EPI_ISL_4508280, EPI_ISL_4508281, EPI_ISL_4508282, EPI_ISL_4508283, EPI_ISL_4508284, EPI_ISL_4508285, EPI_ISL_4508286, EPI_ISL_4508287, EPI_ISL_4508288, EPI_ISL_4508289, EPI_ISL_4508290, EPI_ISL_4508291, EPI_ISL_4508292, EPI_ISL_4508293, EPI_ISL_4508294                                                                                                                                                                                                                                                                                                                                                                                                                                                                                                                                                                                                   | see above                      | WISMA ATLET                                                                                     | Arie Ardiansyah Nugraha; Fajar Nur Sulistiyohadi; Hana Apsari Pawestri; Hartanti Dian Ikawati; Kartika Dewi Puspa; Krisna Pangesti; Nelly Puspandari; Subangkit; Triyani Soekarso; Vivi Setiawaty                                                                                                                                           |
| EPI_ISL_5328472, EPI_ISL_5328473                                                                                                                                                                                                                                                                                                                                                                                                                                                                                                                                                                                                                                                                                                                                                                                                                                                                                   | Waled Regional Public Hospital | West Java Health Laboratory; School of Life Sciences and Technology, Institut Teknologi Bandung | Azzania Fibriani; Cut Nur Cinthia Alamanda; Ema Rahmawati; Karimatu Khoirunnisa; Miftahul Faridl; Rifky Waluyajati Rachman; Rini Robiani; Ryan Bayusantika Ristandi                                                                                                                                                                         |
| EPI_ISL_1398934                                                                                                                                                                                                                                                                                                                                                                                                                                                                                                                                                                                                                                                                                                                                                                                                                                                                                                    | West Bandung Public Health     | West Java Health Laboratory                                                                     | Azzania Fibriani; Cut Nur Cinthia Alamanda; Ema Rahmawati; Isak Solihin; Kamila Tania; Karimatu Khoirunnisa; Miftahul Faridl; Rifky Waluyajati Rachman; Rini Robiani; Ryan Bayusantika Ristandi                                                                                                                                             |
| EPI_ISL_1340862, EPI_ISL_1340863, EPI_ISL_1340864, EPI_ISL_1340865, EPI_ISL_1340866, EPI_ISL_1340867, EPI_ISL_1341792, EPI_ISL_1341793, EPI_ISL_1341794, EPI_ISL_1341795, EPI_ISL_1341796, EPI_ISL_1341797, EPI_ISL_1345232, EPI_ISL_1346484, EPI_ISL_1398361, EPI_ISL_1398563, EPI_ISL_1398568, EPI_ISL_1398929, EPI_ISL_1398984, EPI_ISL_1660415, EPI_ISL_1660473                                                                                                                                                                                                                                                                                                                                                                                                                                                                                                                                                | see above                      | West Java Health Laboratory; School of Life Sciences and Technology, Institut Teknologi Bandung | Aulia Saraswati Wicaksono; Azzania Fibriani; Cut Nur Cinthia Alamanda; Ema Rahmawati; Isak Solihin; Kamila Tania; Karimatu Khoirunnisa; Miftahul Faridl; Rifky Waluyajati Rachman; Rini Robiani; Ryan Bayusantika Ristandi                                                                                                                  |
| EPI_ISL_2709404, EPI_ISL_2709405, EPI_ISL_2709406, EPI_ISL_2709407, EPI_ISL_2709408, EPI_ISL_2709409, EPI_ISL_2709410, EPI_ISL_2709411, EPI_ISL_2709412, EPI_ISL_2709413, EPI_ISL_2709414, EPI_ISL_2709415, EPI_ISL_2709416, EPI_ISL_2709418, EPI_ISL_2709419, EPI_ISL_2709420, EPI_ISL_2709421, EPI_ISL_2709422, EPI_ISL_2709423, EPI_ISL_2709424, EPI_ISL_2709425, EPI_ISL_2709426, EPI_ISL_2709427, EPI_ISL_2709428, EPI_ISL_2709429, EPI_ISL_2709430, EPI_ISL_2709431, EPI_ISL_2709432, EPI_ISL_2709433, EPI_ISL_2709434, EPI_ISL_2709435, EPI_ISL_2709436, EPI_ISL_2709437, EPI_ISL_2709438, EPI_ISL_2709439, EPI_ISL_2709440, EPI_ISL_2709441, EPI_ISL_2709442, EPI_ISL_2709443, EPI_ISL_2709444, EPI_ISL_2709445, EPI_ISL_2709446                                                                                                                                                                           | see above                      | West Java Health Laboratory                                                                     | Amin Soebandrio; Azzania Fibriani; Cut Nur Cinthia Alamanda; Edison Johar; Ema Rahmawati; Frilasita A Yudhaputri; Hidayat Trimarsanto; Iskandar Adnan; Khin Saw Myint; Lidwina Priliani; Lydia V. Panggalo; Muhammad Rezki Rasyak; Rifky Waluyajati Rachman; Ryan Bayusantika Ristandi; Safarina G Malik; Sukma Oktavianthi; Willy Agustine |
| EPI_ISL_745033, EPI_ISL_4885334, EPI_ISL_4885335, EPI_ISL_4885336, EPI_ISL_4885337, EPI_ISL_4885338, EPI_ISL_4885339, EPI_ISL_4885340, EPI_ISL_4885341, EPI_ISL_4885342, EPI_ISL_4885343, EPI_ISL_4885344, EPI_ISL_4885345, EPI_ISL_4885346, EPI_ISL_4885347, EPI_ISL_4885348                                                                                                                                                                                                                                                                                                                                                                                                                                                                                                                                                                                                                                      | see above                      | West Java Health Laboratory                                                                     | Azzania Fibriani; Cut Nur Cinthia Alamanda; Ema Rahmawati; Isak Solihin; Karimatu Khoirunnisa; Miftahul Faridl; Rifky Waluyajati Rachman; Rini Robiani; Ryan Bayusantika Ristandi                                                                                                                                                           |
| EPI_ISL_1343218, EPI_ISL_1344587, EPI_ISL_1346047, EPI_ISL_1398363, EPI_ISL_1398371, EPI_ISL_1398562, EPI_ISL_1398567, EPI_ISL_1615600, EPI_ISL_1615660, EPI_ISL_1660413, EPI_ISL_1660416, EPI_ISL_5328493, EPI_ISL_5328494, EPI_ISL_5328495, EPI_ISL_5328496, EPI_ISL_5328497, EPI_ISL_5328498, EPI_ISL_5328499, EPI_ISL_5328500, EPI_ISL_5328501, EPI_ISL_5328502, EPI_ISL_5328503, EPI_ISL_5328504, EPI_ISL_5328505, EPI_ISL_5328506, EPI_ISL_5328507, EPI_ISL_5328508, EPI_ISL_5328509, EPI_ISL_5328510, EPI_ISL_5328511, EPI_ISL_5328512, EPI_ISL_5328513, EPI_ISL_5328514, EPI_ISL_5328515, EPI_ISL_5328516, EPI_ISL_5328517, EPI_ISL_5328518, EPI_ISL_5328519, EPI_ISL_5328520, EPI_ISL_5328521, EPI_ISL_5328522, EPI_ISL_5328523, EPI_ISL_5328524, EPI_ISL_5328525, EPI_ISL_5328526, EPI_ISL_5328527, EPI_ISL_5328528, EPI_ISL_5328529, EPI_ISL_5328530, EPI_ISL_5328531, EPI_ISL_5328532, EPI_ISL_5328533 | see above                      | West Java Health Laboratory                                                                     | Aulia Saraswati Wicaksono; Azzania Fibriani; Cut Nur Cinthia Alamanda; Ema Rahmawati; Isak Solihin; Kamila Tania; Karimatu Khoirunnisa; Miftahul Faridl; Rifky Waluyajati Rachman; Rini Robiani; Ryan Bayusantika Ristandi                                                                                                                  |
| EPI_ISL_2382408, EPI_ISL_2382409, EPI_ISL_2382410                                                                                                                                                                                                                                                                                                                                                                                                                                                                                                                                                                                                                                                                                                                                                                                                                                                                  | Wisma Atlet                    | National Institute of Health Research and Development                                           | Arie Ardiansyah Nugraha; Hana Apsari Pawestri; Hartanti Dian Ikawati; Kartika Dewi Puspa; Krisna Pangesti; Nelly Puspandari; Subangkit; Triyani Soekarso; Vivi Setiawaty                                                                                                                                                                    |

We gratefully acknowledge the following Authors from the Originating laboratories responsible for obtaining the specimens, as well as the Submitting laboratories where the genome data were generated and shared via GISAID, on which this research is based.

All Submitters of data may be contacted directly via [www.gisaid.org](http://www.gisaid.org)

Authors are sorted alphabetically.

| Accession ID                                                                                                                                                                                                                                                                                                                                                                                                                                                                                                                                                                                               | Originating Laboratory                                                     | Submitting Laboratory                                                      | Authors                                                                                                                                                                                            |
|------------------------------------------------------------------------------------------------------------------------------------------------------------------------------------------------------------------------------------------------------------------------------------------------------------------------------------------------------------------------------------------------------------------------------------------------------------------------------------------------------------------------------------------------------------------------------------------------------------|----------------------------------------------------------------------------|----------------------------------------------------------------------------|----------------------------------------------------------------------------------------------------------------------------------------------------------------------------------------------------|
| EPI_ISL_1122419, EPI_ISL_1122420, EPI_ISL_1122421                                                                                                                                                                                                                                                                                                                                                                                                                                                                                                                                                          | National Public Health Laboratory, National Centre for Infectious Diseases | National Virology Reference Laboratory                                     | Lin Cui; Raymond Tzer Pin Lin; Surita Taib; Tze Minn Mak; Zainun Zaini; Zhenyang Zhou                                                                                                              |
| EPI_ISL_435674, EPI_ISL_435675, EPI_ISL_435676, EPI_ISL_435677, EPI_ISL_443187, EPI_ISL_962877, EPI_ISL_962878, EPI_ISL_3602079, EPI_ISL_3602082, EPI_ISL_3602083, EPI_ISL_3602085, EPI_ISL_3602088, EPI_ISL_3602090, EPI_ISL_3602091, EPI_ISL_3602093, EPI_ISL_3602096, EPI_ISL_3602100, EPI_ISL_3602101, EPI_ISL_3602103, EPI_ISL_3602104, EPI_ISL_3602107, EPI_ISL_3602110, EPI_ISL_3602112, EPI_ISL_3681492, EPI_ISL_3681496, EPI_ISL_3681499, EPI_ISL_3681501, EPI_ISL_3681504, EPI_ISL_3681508, EPI_ISL_3681511, EPI_ISL_3681514, EPI_ISL_3681516, EPI_ISL_3681519, EPI_ISL_3681523, EPI_ISL_3681525 | National Virology Reference Laboratory                                     | National Public Health Laboratory, National Centre for Infectious Diseases | Chavatte Jean-Marc; Cui Lin; Katherine Ching; Lin Cui; Lin Raymond Tzer Pin; Mak Tze Minn; Octavia Sophie; Raymond Tzer Pin Lin; Royce Ang; Taib Surita; Tze Minn Mak; Zaini Zainun; Zhenyang Zhou |
| see above                                                                                                                                                                                                                                                                                                                                                                                                                                                                                                                                                                                                  | National Virology Reference Laboratory                                     |                                                                            |                                                                                                                                                                                                    |

We gratefully acknowledge the following Authors from the Originating laboratories responsible for obtaining the specimens, as well as the Submitting laboratories where the genome data were generated and shared via GISAID, on which this research is based.

All Submitters of data may be contacted directly via [www.gisaid.org](http://www.gisaid.org)

Authors are sorted alphabetically.

| Accession ID                                                                                                                                                                                                                                                                   | Originating Laboratory                  | Submitting Laboratory                   | Authors                                                                                                                                                                                                                                                                                                       |
|--------------------------------------------------------------------------------------------------------------------------------------------------------------------------------------------------------------------------------------------------------------------------------|-----------------------------------------|-----------------------------------------|---------------------------------------------------------------------------------------------------------------------------------------------------------------------------------------------------------------------------------------------------------------------------------------------------------------|
| EPI_ISL_480601, EPI_ISL_480602                                                                                                                                                                                                                                                 | National Health Laboratory, Timor-Leste | MDU-PHL                                 | Antonia da Costa, E.; Baird, R.; Barreto, I.; Caly, L.; Canisia, D.; Dakh, F.; Dolores de Jesus da Costa, M.; Douglas, N.; Francis, J.; Freeman, K.; Jayanti Pereira Tilman, A.; Marr, I.; Sait, M.; Salles de Sousa, A.; Schultz, M.; Seemann, T.; Sherry, N.; Soares da Silva, E.; Wapling, J.; Ximenes, J. |
| EPI_ISL_456596, EPI_ISL_456597, EPI_ISL_456598, EPI_ISL_456599, EPI_ISL_456600, EPI_ISL_456601, EPI_ISL_456602, EPI_ISL_456603, EPI_ISL_456604, EPI_ISL_456605, EPI_ISL_456606, EPI_ISL_456607, EPI_ISL_456608, EPI_ISL_456609, EPI_ISL_456610, EPI_ISL_456611, EPI_ISL_456612 | see above                               | National Health Laboratory, Timor-Leste | Microbiological Diagnostic Unit Public Health Laboratory, The Peter Doherty Institute for Infection and Immunity                                                                                                                                                                                              |
|                                                                                                                                                                                                                                                                                |                                         |                                         | Antonia da Costa, E.; Baird, R.; Barreto, I.; Caly, L.; Canisia, D.; Dakh, F.; Dolores de Jesus da Costa, M.; Douglas, N.; Francis, J.; Freeman, K.; Jayanti Pereira Tilman, A.; Marr, I.; Sait, M.; Salles de Sousa, A.; Schultz, M.; Seemann, T.; Sherry, N.; Soares da Silva, E.; Wapling, J.; Ximenes, J. |

We gratefully acknowledge the following Authors from the Originating laboratories responsible for obtaining the specimens, as well as the Submitting laboratories where the genome data were generated and shared via GISAID, on which this research is based.

All Submitters of data may be contacted directly via [www.gisaid.org](http://www.gisaid.org)

Authors are sorted alphabetically.

| Accession ID                                                                                                                                                                                                                                                                                                                                                                                                                                                                                                                                                                                                                                                                                                                                                                                                                                                                                                                                                                                                                                                                                                                                                                                                                                                                                                                                                                                                                                                                                                                                                                                                                                                                                                                                                                                                                                                                                                                                                                                                                                                                                                                                                                                                                                                                                                                                                                                                                                                                                                                                                                                                                                                                                                                                                                                                                                                                                                                                                                                                                                                                                                                                                                                                                                                                                                                   | Originating Laboratory                                                                                                  | Submitting Laboratory                                                                                                                                                                                               | Authors                                                                                                                                                                                                                                                                                                                                                                                                                    |
|--------------------------------------------------------------------------------------------------------------------------------------------------------------------------------------------------------------------------------------------------------------------------------------------------------------------------------------------------------------------------------------------------------------------------------------------------------------------------------------------------------------------------------------------------------------------------------------------------------------------------------------------------------------------------------------------------------------------------------------------------------------------------------------------------------------------------------------------------------------------------------------------------------------------------------------------------------------------------------------------------------------------------------------------------------------------------------------------------------------------------------------------------------------------------------------------------------------------------------------------------------------------------------------------------------------------------------------------------------------------------------------------------------------------------------------------------------------------------------------------------------------------------------------------------------------------------------------------------------------------------------------------------------------------------------------------------------------------------------------------------------------------------------------------------------------------------------------------------------------------------------------------------------------------------------------------------------------------------------------------------------------------------------------------------------------------------------------------------------------------------------------------------------------------------------------------------------------------------------------------------------------------------------------------------------------------------------------------------------------------------------------------------------------------------------------------------------------------------------------------------------------------------------------------------------------------------------------------------------------------------------------------------------------------------------------------------------------------------------------------------------------------------------------------------------------------------------------------------------------------------------------------------------------------------------------------------------------------------------------------------------------------------------------------------------------------------------------------------------------------------------------------------------------------------------------------------------------------------------------------------------------------------------------------------------------------------------|-------------------------------------------------------------------------------------------------------------------------|---------------------------------------------------------------------------------------------------------------------------------------------------------------------------------------------------------------------|----------------------------------------------------------------------------------------------------------------------------------------------------------------------------------------------------------------------------------------------------------------------------------------------------------------------------------------------------------------------------------------------------------------------------|
| EPI_ISL_1495992, EPI_ISL_1495993, EPI_ISL_1495994, EPI_ISL_1495996, EPI_ISL_1495997<br>EPI_ISL_3827430                                                                                                                                                                                                                                                                                                                                                                                                                                                                                                                                                                                                                                                                                                                                                                                                                                                                                                                                                                                                                                                                                                                                                                                                                                                                                                                                                                                                                                                                                                                                                                                                                                                                                                                                                                                                                                                                                                                                                                                                                                                                                                                                                                                                                                                                                                                                                                                                                                                                                                                                                                                                                                                                                                                                                                                                                                                                                                                                                                                                                                                                                                                                                                                                                         | ATGenes Co. Ltd.                                                                                                        | National Institute of Health, Department of Medical Sciences, Ministry of Public Health, Thailand                                                                                                                   | Hathaikan Tanchai; Natchaya Khidsang; Nuttida Thongpramul; Pakorn Piromtong; Pilailuk Okada; Ratana Tacharoenmuang; Siripaporn Phuygun; Sittiporn Parmnen; Sunthareeya Waicharoen.; Thanutsapa Thanadachakul                                                                                                                                                                                                               |
| EPI_ISL_403962, EPI_ISL_403963                                                                                                                                                                                                                                                                                                                                                                                                                                                                                                                                                                                                                                                                                                                                                                                                                                                                                                                                                                                                                                                                                                                                                                                                                                                                                                                                                                                                                                                                                                                                                                                                                                                                                                                                                                                                                                                                                                                                                                                                                                                                                                                                                                                                                                                                                                                                                                                                                                                                                                                                                                                                                                                                                                                                                                                                                                                                                                                                                                                                                                                                                                                                                                                                                                                                                                 | Bamrasnaradura Hospital                                                                                                 | 1. Department of Medical Sciences, Ministry of Public Health, Thailand 2. Thai Red Cross Emerging Infectious Diseases - Health Science Centre 3. Department of Disease Control, Ministry of Public Health, Thailand | Buathong; Chittaganpitch; Malinee; Mekha; Nanthawan; Okada; Parmnen; Phuygun; Pilailuk; Rome; Siripaporn; Sittiporn; Sunthareeya; Supaporn; Thanadachakul; Thanutsapa; Wacharapluesadee; Waicharoen; Warawan; Wongboot                                                                                                                                                                                                     |
| EPI_ISL_635199<br>EPI_ISL_434692, EPI_ISL_434693, EPI_ISL_434694, EPI_ISL_434696, EPI_ISL_515469                                                                                                                                                                                                                                                                                                                                                                                                                                                                                                                                                                                                                                                                                                                                                                                                                                                                                                                                                                                                                                                                                                                                                                                                                                                                                                                                                                                                                                                                                                                                                                                                                                                                                                                                                                                                                                                                                                                                                                                                                                                                                                                                                                                                                                                                                                                                                                                                                                                                                                                                                                                                                                                                                                                                                                                                                                                                                                                                                                                                                                                                                                                                                                                                                               | Bamrasnaradura Infectious Disease Institute<br>Bamrasnaradura hospital                                                  | Molecular HIV and Emerging Infectious Diseases Laboratory<br>National Institute of Health. Department of medical Sciences, Ministry of Public Health, Thailand                                                      | Sumonmal UTTAYAMAKUL<br>Chittaganpitch; Malinee; Okada; Parmnen; Phuygun; Pilailuk; Siripaporn; Sittiporn; Sunthareeya; Thanadachakul; Thanutsapa; Waicharoen; Warawan; Wongboot                                                                                                                                                                                                                                           |
| EPI_ISL_3827388, EPI_ISL_3827433<br>EPI_ISL_3827317, EPI_ISL_3827321, EPI_ISL_3827322, EPI_ISL_3827323, EPI_ISL_3827332, EPI_ISL_3827333, EPI_ISL_3827447                                                                                                                                                                                                                                                                                                                                                                                                                                                                                                                                                                                                                                                                                                                                                                                                                                                                                                                                                                                                                                                                                                                                                                                                                                                                                                                                                                                                                                                                                                                                                                                                                                                                                                                                                                                                                                                                                                                                                                                                                                                                                                                                                                                                                                                                                                                                                                                                                                                                                                                                                                                                                                                                                                                                                                                                                                                                                                                                                                                                                                                                                                                                                                      | Ban Dung Crown Prince Hospital                                                                                          | Division of Genomic Medicine and Innovation support,Department of Medical Sciences, Ministry of Public Health, Thailand                                                                                             | Archawin Rojanawiwat; Jirapha Pakdee; Natthakul Bunneang; Nuanjun Wichukchinda; Penpitcha Thawong; Pilailuk Akkapaiboon Okada; Pundharika Piboonsiri; Surakameth Mahasirimongkol; Waritta Sawaengdee                                                                                                                                                                                                                       |
| see above                                                                                                                                                                                                                                                                                                                                                                                                                                                                                                                                                                                                                                                                                                                                                                                                                                                                                                                                                                                                                                                                                                                                                                                                                                                                                                                                                                                                                                                                                                                                                                                                                                                                                                                                                                                                                                                                                                                                                                                                                                                                                                                                                                                                                                                                                                                                                                                                                                                                                                                                                                                                                                                                                                                                                                                                                                                                                                                                                                                                                                                                                                                                                                                                                                                                                                                      | Ban hong Hospital                                                                                                       | Division of Genomic Medicine and Innovation support,Department of Medical Sciences, Ministry of Public Health, Thailand                                                                                             | Archawin Rojanawiwat; Jirapha Pakdee; Natthakul Bunneang; Nuanjun Wichukchinda; Penpitcha Thawong; Pilailuk Akkapaiboon Okada; Pundharika Piboonsiri; Surakameth Mahasirimongkol; Waritta Sawaengdee                                                                                                                                                                                                                       |
| EPI_ISL_3827176, EPI_ISL_3827399, EPI_ISL_3827400, EPI_ISL_3827401, EPI_ISL_3827402, EPI_ISL_3827403, EPI_ISL_3827404, EPI_ISL_3827405, EPI_ISL_3827406, EPI_ISL_3827407, EPI_ISL_3827408, EPI_ISL_3827409, EPI_ISL_3827410, EPI_ISL_3827411, EPI_ISL_3827412, EPI_ISL_3827413, EPI_ISL_3827414, EPI_ISL_3827415, EPI_ISL_3827416, EPI_ISL_3827417, EPI_ISL_3827418, EPI_ISL_3827419, EPI_ISL_3827420, EPI_ISL_3827421, EPI_ISL_3827422, EPI_ISL_3827423, EPI_ISL_3827424, EPI_ISL_3827435, EPI_ISL_3827436, EPI_ISL_3827437, EPI_ISL_3827438, EPI_ISL_3827439, EPI_ISL_3827440, EPI_ISL_3827441, EPI_ISL_3827449, EPI_ISL_3827450, EPI_ISL_3827451, EPI_ISL_3827452, EPI_ISL_3827454, EPI_ISL_3827456, EPI_ISL_3827459, EPI_ISL_3827463, EPI_ISL_3827464, EPI_ISL_3827466, EPI_ISL_3827467, EPI_ISL_3827468, EPI_ISL_3827470, EPI_ISL_3827471, EPI_ISL_3827477, EPI_ISL_3827480, EPI_ISL_3827483, EPI_ISL_3827484, EPI_ISL_3827485, EPI_ISL_3827486                                                                                                                                                                                                                                                                                                                                                                                                                                                                                                                                                                                                                                                                                                                                                                                                                                                                                                                                                                                                                                                                                                                                                                                                                                                                                                                                                                                                                                                                                                                                                                                                                                                                                                                                                                                                                                                                                                                                                                                                                                                                                                                                                                                                                                                                                                                                                                           | Division of Genomic Medicine and Innovation support,Department of Medical Sciences, Ministry of Public Health, Thailand | Archawin Rojanawiwat; Jirapha Pakdee; Natthakul Bunneang; Nuanjun Wichukchinda; Penpitcha Thawong; Pilailuk Akkapaiboon Okada; Pundharika Piboonsiri; Surakameth Mahasirimongkol; Waritta Sawaengdee                |                                                                                                                                                                                                                                                                                                                                                                                                                            |
| see above                                                                                                                                                                                                                                                                                                                                                                                                                                                                                                                                                                                                                                                                                                                                                                                                                                                                                                                                                                                                                                                                                                                                                                                                                                                                                                                                                                                                                                                                                                                                                                                                                                                                                                                                                                                                                                                                                                                                                                                                                                                                                                                                                                                                                                                                                                                                                                                                                                                                                                                                                                                                                                                                                                                                                                                                                                                                                                                                                                                                                                                                                                                                                                                                                                                                                                                      | Bangkok Health Centre                                                                                                   | Division of Genomic Medicine and Innovation support,Department of Medical Sciences, Ministry of Public Health, Thailand                                                                                             | Archawin Rojanawiwat; Jirapha Pakdee; Natthakul Bunneang; Nuanjun Wichukchinda; Penpitcha Thawong; Pilailuk Akkapaiboon Okada; Pundharika Piboonsiri; Surakameth Mahasirimongkol; Waritta Sawaengdee                                                                                                                                                                                                                       |
| EPI_ISL_2433317                                                                                                                                                                                                                                                                                                                                                                                                                                                                                                                                                                                                                                                                                                                                                                                                                                                                                                                                                                                                                                                                                                                                                                                                                                                                                                                                                                                                                                                                                                                                                                                                                                                                                                                                                                                                                                                                                                                                                                                                                                                                                                                                                                                                                                                                                                                                                                                                                                                                                                                                                                                                                                                                                                                                                                                                                                                                                                                                                                                                                                                                                                                                                                                                                                                                                                                | Bangkok Hospital Phuket                                                                                                 | Division of Genomic Medicine and Innovation support,Department of Medical Sciences, Ministry of Public Health, Thailand                                                                                             | Archawin Rojanawiwat; Jirapha Pakdee; Natthakul Bunneang; Nuanjun Wichukchinda; Penpitcha Thawong; Pilailuk Akkapaiboon Okada; Pundharika Piboonsiri; Surakameth Mahasirimongkol; Waritta Sawaengdee                                                                                                                                                                                                                       |
| EPI_ISL_4235358, EPI_ISL_4235366, EPI_ISL_4235373, EPI_ISL_4235433                                                                                                                                                                                                                                                                                                                                                                                                                                                                                                                                                                                                                                                                                                                                                                                                                                                                                                                                                                                                                                                                                                                                                                                                                                                                                                                                                                                                                                                                                                                                                                                                                                                                                                                                                                                                                                                                                                                                                                                                                                                                                                                                                                                                                                                                                                                                                                                                                                                                                                                                                                                                                                                                                                                                                                                                                                                                                                                                                                                                                                                                                                                                                                                                                                                             | Bangkok Metropolitan Administration                                                                                     | Division of Genomic Medicine and Innovation support,Department of Medical Sciences, Ministry of Public Health, Thailand                                                                                             | Archawin Rojanawiwat; Jirapha Pakdee; Natthakul Bunneang; Nuanjun Wichukchinda; Penpitcha Thawong; Pilailuk Akkapaiboon Okada; Pundharika Piboonsiri; Surakameth Mahasirimongkol; Waritta Sawaengdee                                                                                                                                                                                                                       |
| EPI_ISL_3827194, EPI_ISL_3827195, EPI_ISL_3827196                                                                                                                                                                                                                                                                                                                                                                                                                                                                                                                                                                                                                                                                                                                                                                                                                                                                                                                                                                                                                                                                                                                                                                                                                                                                                                                                                                                                                                                                                                                                                                                                                                                                                                                                                                                                                                                                                                                                                                                                                                                                                                                                                                                                                                                                                                                                                                                                                                                                                                                                                                                                                                                                                                                                                                                                                                                                                                                                                                                                                                                                                                                                                                                                                                                                              | Bangkok hospital Pattaya                                                                                                | Division of Genomic Medicine and Innovation support,Department of Medical Sciences, Ministry of Public Health, Thailand                                                                                             | Archawin Rojanawiwat; Jirapha Pakdee; Natthakul Bunneang; Nuanjun Wichukchinda; Penpitcha Thawong; Pilailuk Akkapaiboon Okada; Pundharika Piboonsiri; Surakameth Mahasirimongkol; Waritta Sawaengdee                                                                                                                                                                                                                       |
| EPI_ISL_1497602, EPI_ISL_1497603<br>EPI_ISL_699484, EPI_ISL_708721, EPI_ISL_708722, EPI_ISL_708736                                                                                                                                                                                                                                                                                                                                                                                                                                                                                                                                                                                                                                                                                                                                                                                                                                                                                                                                                                                                                                                                                                                                                                                                                                                                                                                                                                                                                                                                                                                                                                                                                                                                                                                                                                                                                                                                                                                                                                                                                                                                                                                                                                                                                                                                                                                                                                                                                                                                                                                                                                                                                                                                                                                                                                                                                                                                                                                                                                                                                                                                                                                                                                                                                             | Bangpakok 9 International Hospital<br>Bangpakok 9 international hospital                                                | National Institute of Health, Department of Medical Sciences, Ministry of Public Health, Thailand<br>National Institute of Health, Department of Medical Sciences, Ministry of Public Health, Thailand              | Hathaikan Tanchai; Natchaya Khidsang; Nuttida Thongpramul; Pakorn Piromtong; Pilailuk Okada; Ratana Tacharoenmuang; Siripaporn Phuygun; Sittiporn Parmnen; Sunthareeya Waicharoen.; Thanutsapa Thanadachakul<br>Malinee Chittaganpitch; Pilailuk Okada; Siripaporn Phuygun; Sittiporn Parmnen; Sunthareeya Waicharoen; Thanutsapa Thanadachakul; Warawan Wongboot                                                          |
| EPI_ISL_3827336, EPI_ISL_3827337<br>EPI_ISL_493137, EPI_ISL_493139                                                                                                                                                                                                                                                                                                                                                                                                                                                                                                                                                                                                                                                                                                                                                                                                                                                                                                                                                                                                                                                                                                                                                                                                                                                                                                                                                                                                                                                                                                                                                                                                                                                                                                                                                                                                                                                                                                                                                                                                                                                                                                                                                                                                                                                                                                                                                                                                                                                                                                                                                                                                                                                                                                                                                                                                                                                                                                                                                                                                                                                                                                                                                                                                                                                             | Bangplee Hospital<br>Center for Research and Innovation, Faculty of Medical Technology, Mahidol University              | Division of Genomic Medicine and Innovation support,Department of Medical Sciences, Ministry of Public Health, Thailand<br>Center for Research and Innovation, Faculty of Medical Technology, Mahidol University    | Archawin Rojanawiwat; Jirapha Pakdee; Natthakul Bunneang; Nuanjun Wichukchinda; Penpitcha Thawong; Pilailuk Akkapaiboon Okada; Pundharika Piboonsiri; Surakameth Mahasirimongkol; Waritta Sawaengdee<br>Anek Mungaomklang; Hatairat Lertsamran; Jarunee Prasertsopon; Kamolthip Atsawawanarunt; Kantima Sangsiriwut; Nattakan Thinpan; Pilaipan Puthavathana; Prabda Praphasiri; Somrak Sirikhetkon; Tipsuda Chanmanee     |
| EPI_ISL_450875, EPI_ISL_450876, EPI_ISL_450877, EPI_ISL_450878, EPI_ISL_450879, EPI_ISL_450880, EPI_ISL_450881, EPI_ISL_450882, EPI_ISL_450883, EPI_ISL_450884, EPI_ISL_450885, EPI_ISL_450886, EPI_ISL_450887, EPI_ISL_450888, EPI_ISL_450889, EPI_ISL_450890, EPI_ISL_450891, EPI_ISL_450892, EPI_ISL_450893, EPI_ISL_450894, EPI_ISL_450895, EPI_ISL_450896, EPI_ISL_450897, EPI_ISL_450898, EPI_ISL_450899, EPI_ISL_450900, EPI_ISL_450901, EPI_ISL_450902, EPI_ISL_450903, EPI_ISL_450904, EPI_ISL_450905, EPI_ISL_450906, EPI_ISL_450907, EPI_ISL_450908, EPI_ISL_450909, EPI_ISL_450910, EPI_ISL_450911, EPI_ISL_450912, EPI_ISL_450913, EPI_ISL_450914, EPI_ISL_450915, EPI_ISL_450916, EPI_ISL_450917, EPI_ISL_450918, EPI_ISL_450919, EPI_ISL_450920, EPI_ISL_450921, EPI_ISL_450922, EPI_ISL_450923, EPI_ISL_450924, EPI_ISL_450925, EPI_ISL_450926, EPI_ISL_450927, EPI_ISL_450928, EPI_ISL_450929, EPI_ISL_450930, EPI_ISL_450931, EPI_ISL_450932, EPI_ISL_450933, EPI_ISL_450934, EPI_ISL_450935, EPI_ISL_450936, EPI_ISL_450937, EPI_ISL_450938, EPI_ISL_450939, EPI_ISL_450940, EPI_ISL_450941, EPI_ISL_450942, EPI_ISL_450943, EPI_ISL_450944, EPI_ISL_450945, EPI_ISL_450946, EPI_ISL_450947, EPI_ISL_450948, EPI_ISL_450949, EPI_ISL_450950, EPI_ISL_450951, EPI_ISL_450952, EPI_ISL_450953, EPI_ISL_450954, EPI_ISL_450955, EPI_ISL_450956, EPI_ISL_450957, EPI_ISL_450958, EPI_ISL_450959, EPI_ISL_450960, EPI_ISL_450961, EPI_ISL_450962, EPI_ISL_450963, EPI_ISL_450964, EPI_ISL_450965, EPI_ISL_450966, EPI_ISL_450967, EPI_ISL_450968, EPI_ISL_450969, EPI_ISL_450970, EPI_ISL_450971, EPI_ISL_450972, EPI_ISL_450973, EPI_ISL_450974, EPI_ISL_450975, EPI_ISL_450976, EPI_ISL_450977, EPI_ISL_450978, EPI_ISL_450979, EPI_ISL_450980, EPI_ISL_450981, EPI_ISL_450982, EPI_ISL_450983, EPI_ISL_450984, EPI_ISL_450985, EPI_ISL_450986, EPI_ISL_450987, EPI_ISL_450988, EPI_ISL_450989, EPI_ISL_450990, EPI_ISL_450991, EPI_ISL_450992, EPI_ISL_450993, EPI_ISL_450994, EPI_ISL_450995, EPI_ISL_450996, EPI_ISL_450997, EPI_ISL_450998, EPI_ISL_450999, EPI_ISL_451000, EPI_ISL_451001, EPI_ISL_451002, EPI_ISL_451003, EPI_ISL_451004, EPI_ISL_451005, EPI_ISL_451006, EPI_ISL_451007, EPI_ISL_451008, EPI_ISL_451009, EPI_ISL_451010, EPI_ISL_451011, EPI_ISL_451012, EPI_ISL_451013, EPI_ISL_451014, EPI_ISL_451015, EPI_ISL_451016, EPI_ISL_451017, EPI_ISL_451018, EPI_ISL_451019, EPI_ISL_451020, EPI_ISL_451021, EPI_ISL_451022, EPI_ISL_451023, EPI_ISL_451024, EPI_ISL_451025, EPI_ISL_451026, EPI_ISL_451027, EPI_ISL_451028, EPI_ISL_451029, EPI_ISL_451030, EPI_ISL_451031, EPI_ISL_451032, EPI_ISL_451033, EPI_ISL_451034, EPI_ISL_451035, EPI_ISL_451036, EPI_ISL_451037, EPI_ISL_451038, EPI_ISL_451039, EPI_ISL_451040, EPI_ISL_451041, EPI_ISL_451042, EPI_ISL_451043, EPI_ISL_451044, EPI_ISL_451045, EPI_ISL_451046, EPI_ISL_451047, EPI_ISL_451048, EPI_ISL_451049, EPI_ISL_451050, EPI_ISL_451051, EPI_ISL_451052, EPI_ISL_451053, EPI_ISL_451054, EPI_ISL_451055, EPI_ISL_451056, EPI_ISL_451057, EPI_ISL_451058, EPI_ISL_451059, EPI_ISL_451060, EPI_ISL_451061, EPI_ISL_451062, EPI_ISL_451063, EPI_ISL_451064, EPI_ISL_451065, EPI_ISL_451066, EPI_ISL_451067, EPI_ISL_451068, EPI_ISL_451069, EPI_ISL_451070, EPI_ISL_451071, EPI_ISL_451072, EPI_ISL_451073, EPI_ISL_451074 | Center of Excellence in Clinical Virology<br>Center of Excellence in Clinical Virology                                  | Auphimai, C.; Chansaenroj, J.; Nilyanimit, P.; Poovorawan, Y.; Puenpa, J.; Suwannakarn, K.; Yorsaeng, R.                                                                                                            |                                                                                                                                                                                                                                                                                                                                                                                                                            |
| EPI_ISL_1346626, EPI_ISL_1346628, EPI_ISL_1346630, EPI_ISL_1346631, EPI_ISL_1346634, EPI_ISL_1346636, EPI_ISL_4254666, EPI_ISL_4254674, EPI_ISL_4254675, EPI_ISL_4254677, EPI_ISL_4254678, EPI_ISL_4254726, EPI_ISL_4254828, EPI_ISL_4254830, EPI_ISL_4255004, EPI_ISL_4255005, EPI_ISL_4255166, EPI_ISL_4255167, EPI_ISL_4255168, EPI_ISL_4255169, EPI_ISL_4255170, EPI_ISL_4255171, EPI_ISL_4255179, EPI_ISL_4255418, EPI_ISL_4255541, EPI_ISL_4255542, EPI_ISL_4255543                                                                                                                                                                                                                                                                                                                                                                                                                                                                                                                                                                                                                                                                                                                                                                                                                                                                                                                                                                                                                                                                                                                                                                                                                                                                                                                                                                                                                                                                                                                                                                                                                                                                                                                                                                                                                                                                                                                                                                                                                                                                                                                                                                                                                                                                                                                                                                                                                                                                                                                                                                                                                                                                                                                                                                                                                                                      | Center of Excellence in Clinical Virology                                                                               | Research Unit of Systems Microbiology                                                                                                                                                                               | Amornmas Kongkliang; Amornmas Kongklieng; Anek Mungaomklang; Jira Chansaenroj; Jiratchaya Puenpa; Kamolthip Atsawawanarunt; Nungnuthai Suntronwong; Nutsada Saengdao; Oraphan Mayuramart; Pakkapon Panwijitkul; Pattaraporn Nimsamer; Pathaya Rattanakomol; Ritthideach Yorsaeng; Rujipat Wasitthakaseem; Sunchai Payungporn; Suwanna Petto; Vichan Pawan; Vichan Pawun; Vorthon Sawaswong; Yong Poovorawan; Yong Poovowan |
| EPI_ISL_455583, EPI_ISL_455594<br>EPI_ISL_430842                                                                                                                                                                                                                                                                                                                                                                                                                                                                                                                                                                                                                                                                                                                                                                                                                                                                                                                                                                                                                                                                                                                                                                                                                                                                                                                                                                                                                                                                                                                                                                                                                                                                                                                                                                                                                                                                                                                                                                                                                                                                                                                                                                                                                                                                                                                                                                                                                                                                                                                                                                                                                                                                                                                                                                                                                                                                                                                                                                                                                                                                                                                                                                                                                                                                               | Central Chest Institute of Thailand<br>Central chest Institute of Thailand                                              | National Institute of Health, Department of medical Sciences, Ministry of Public Health, Thailand<br>National Institute of Health, Department of medical Sciences, Ministry of Public Health, Thailand              | Chittaganpitch; Malinee; Okada; Parmnen; Phuygun; Pilailuk; Siripaporn; Sittiporn; Sunthareeya; Thanadachakul; Thanutsapa; Waicharoen; Warawan; Wongboot<br>Chittaganpitch; Malinee; Okada; Parmnen; Phuygun; Pilailuk; Siripaporn; Sittiporn; Sunthareeya; Thanadachakul; Thanutsapa; Waicharoen; Warawan; Wongboot                                                                                                       |
| EPI_ISL_4647505, EPI_ISL_4647506, EPI_ISL_4647511, EPI_ISL_4647512, EPI_ISL_4647522, EPI_ISL_4647523, EPI_ISL_4647528                                                                                                                                                                                                                                                                                                                                                                                                                                                                                                                                                                                                                                                                                                                                                                                                                                                                                                                                                                                                                                                                                                                                                                                                                                                                                                                                                                                                                                                                                                                                                                                                                                                                                                                                                                                                                                                                                                                                                                                                                                                                                                                                                                                                                                                                                                                                                                                                                                                                                                                                                                                                                                                                                                                                                                                                                                                                                                                                                                                                                                                                                                                                                                                                          | Chainat Narenthon Hospital                                                                                              | Division of Genomic Medicine and Innovation support,Department of Medical Sciences, Ministry of Public Health, Thailand                                                                                             | Archawin Rojanawiwat; Jirapha Pakdee; Natthakul Bunneang; Nuanjun Wichukchinda; Penpitcha Thawong; Pilailuk Akkapaiboon Okada; Pundharika Piboonsiri; Surakameth Mahasirimongkol; Waritta Sawaengdee                                                                                                                                                                                                                       |
| EPI_ISL_3827386                                                                                                                                                                                                                                                                                                                                                                                                                                                                                                                                                                                                                                                                                                                                                                                                                                                                                                                                                                                                                                                                                                                                                                                                                                                                                                                                                                                                                                                                                                                                                                                                                                                                                                                                                                                                                                                                                                                                                                                                                                                                                                                                                                                                                                                                                                                                                                                                                                                                                                                                                                                                                                                                                                                                                                                                                                                                                                                                                                                                                                                                                                                                                                                                                                                                                                                | Chaiwan Hospiral                                                                                                        | Division of Genomic Medicine and Innovation support,Department of Medical Sciences, Ministry of Public Health, Thailand                                                                                             | Archawin Rojanawiwat; Jirapha Pakdee; Natthakul Bunneang; Nuanjun Wichukchinda; Penpitcha Thawong; Pilailuk Akkapaiboon Okada; Pundharika Piboonsiri; Surakameth Mahasirimongkol; Waritta Sawaengdee                                                                                                                                                                                                                       |
| EPI_ISL_3407820, EPI_ISL_3419393                                                                                                                                                                                                                                                                                                                                                                                                                                                                                                                                                                                                                                                                                                                                                                                                                                                                                                                                                                                                                                                                                                                                                                                                                                                                                                                                                                                                                                                                                                                                                                                                                                                                                                                                                                                                                                                                                                                                                                                                                                                                                                                                                                                                                                                                                                                                                                                                                                                                                                                                                                                                                                                                                                                                                                                                                                                                                                                                                                                                                                                                                                                                                                                                                                                                                               | Chaiyaphum Hospital                                                                                                     | National Institute of Health, Department of Medical Sciences, Ministry of Public Health, Thailand                                                                                                                   | ; Natchaya Khidsang; Nuttida Thongpramul; Pakorn Piromtong; Pilailuk Okada; Ratana Tacharoenmuang; Siripaporn Phuygun; Sittiporn Parmnen; Sunthareeya Waicharoen; Thanutsapa Thanadachakul; Warawan Wongboot; sirikanda wimol                                                                                                                                                                                              |
| EPI_ISL_2433327, EPI_ISL_2433328, EPI_ISL_2433329, EPI_ISL_2433330, EPI_ISL_2433342, EPI_ISL_2433343, EPI_ISL_2433344, EPI_ISL_2433345                                                                                                                                                                                                                                                                                                                                                                                                                                                                                                                                                                                                                                                                                                                                                                                                                                                                                                                                                                                                                                                                                                                                                                                                                                                                                                                                                                                                                                                                                                                                                                                                                                                                                                                                                                                                                                                                                                                                                                                                                                                                                                                                                                                                                                                                                                                                                                                                                                                                                                                                                                                                                                                                                                                                                                                                                                                                                                                                                                                                                                                                                                                                                                                         | Chana Hospital                                                                                                          | Division of Genomic Medicine and Innovation support,Department of Medical Sciences, Ministry of Public Health, Thailand                                                                                             | Archawin Rojanawiwat; Jirapha Pakdee; Natthakul Bunneang; Nuanjun Wichukchinda; Penpitcha Thawong; Pilailuk Akkapaiboon Okada; Pundharika Piboonsiri; Surakameth Mahasirimongkol; Waritta Sawaengdee                                                                                                                                                                                                                       |
| EPI_ISL_3407001                                                                                                                                                                                                                                                                                                                                                                                                                                                                                                                                                                                                                                                                                                                                                                                                                                                                                                                                                                                                                                                                                                                                                                                                                                                                                                                                                                                                                                                                                                                                                                                                                                                                                                                                                                                                                                                                                                                                                                                                                                                                                                                                                                                                                                                                                                                                                                                                                                                                                                                                                                                                                                                                                                                                                                                                                                                                                                                                                                                                                                                                                                                                                                                                                                                                                                                | Chaophya Hospital                                                                                                       | National Institute of Health, Department of Medical Sciences, Ministry of Public Health, Thailand                                                                                                                   | ; Natchaya Khidsang; Nuttida Thongpramul; Pakorn Piromtong; Pilailuk Okada; Ratana Tacharoenmuang; Siripaporn Phuygun; Sittiporn Parmnen; Sunthareeya Waicharoen; Thanutsapa Thanadachakul; Warawan Wongboot; sirikanda wimol                                                                                                                                                                                              |
| EPI_ISL_4235111, EPI_ISL_4235114, EPI_ISL_4235116, EPI_ISL_4235125, EPI_ISL_4235126, EPI_ISL_4235127, EPI_ISL_4235132, EPI_ISL_4235133, EPI_ISL_4235134, EPI_ISL_4235135, EPI_ISL_4235136, EPI_ISL_4235139, EPI_ISL_4235140, EPI_ISL_4235142, EPI_ISL_4235146, EPI_ISL_4235147, EPI_ISL_4235148, EPI_ISL_4235149, EPI_ISL_4235154, EPI_ISL_4235155, EPI_ISL_4235156, EPI_ISL_4235157, EPI_ISL_4235162, EPI_ISL_4235163, EPI_ISL_4235164, EPI_ISL_4235165, EPI_ISL_4235170, EPI_ISL_4235171, EPI_ISL_4235172, EPI_ISL_4235173, EPI_ISL_4235178, EPI_ISL_4235179, EPI_ISL_4235180, EPI_ISL_4235184, EPI_ISL_4235185, EPI_ISL_4235186, EPI_ISL_4235187, EPI_ISL_4235191, EPI_ISL_4235198, EPI_ISL_4235200, EPI_ISL_4235204, EPI_ISL_4235205, EPI_ISL_4235208, EPI_ISL_4235209, EPI_ISL_4235210, EPI_ISL_4235211, EPI_ISL_4235213, EPI_ISL_4235215, EPI_ISL_4235216, EPI_ISL_4235217, EPI_ISL_4235218, EPI_ISL_4235219, EPI_ISL_4235222, EPI_ISL_4235223, EPI_ISL_4235224, EPI_ISL_4235225, EPI_ISL_4235226, EPI_ISL_4235230, EPI_ISL_4235231, EPI_ISL_4235232, EPI_ISL_4235233, EPI_ISL_4235234, EPI_ISL_4235237, EPI_ISL_4235238, EPI_ISL_4235239, EPI_ISL_4235240, EPI_ISL_4235241, EPI_ISL_4235246, EPI_ISL_4235247, EPI_ISL_4235248, EPI_ISL_4235249, EPI_ISL_4235254, EPI_ISL_4235255, EPI_ISL_4235256, EPI_ISL_4235261, EPI_ISL_4235262, EPI_ISL_4235263, EPI_ISL_4235264, EPI_ISL_4235268, EPI_ISL_4235269, EPI_ISL_4235270, EPI_ISL_4235271, EPI_ISL_4235277, EPI_ISL_4235278, EPI_ISL_4235282, EPI_ISL_4235283, EPI_ISL_4235284, EPI_ISL_4235285, EPI_ISL_4235315, EPI_ISL_4235322, EPI_ISL_4647033, EPI_ISL_4647039, EPI_ISL_4647047, EPI_ISL_4647057, EPI_ISL_4647062, EPI_ISL_4647063, EPI_ISL_4647067, EPI_ISL_4647068, EPI_ISL_4647070, EPI_ISL_4647211, EPI_ISL_4647219, EPI_ISL_4647235, EPI_ISL_4647243, EPI_ISL_4647258, EPI_ISL_4647273, EPI_ISL_4647283, EPI_ISL_4647284, EPI_ISL_4647293                                                                                                                                                                                                                                                                                                                                                                                                                                                                                                                                                                                                                                                                                                                                                                                                                                                                                                                                                                                                                                                                                                                                                                                                                                                                                                                                                                                                                     | Charoenkrung pracharak hospital                                                                                         | Division of Genomic Medicine and Innovation support,Department of Medical Sciences, Ministry of Public Health, Thailand                                                                                             | Archawin Rojanawiwat; Jirapha Pakdee; Natthakul Bunneang; Nuanjun Wichukchinda; Penpitcha Thawong; Pilailuk Akkapaiboon Okada; Pundharika Piboonsiri; Surakameth Mahasirimongkol; Waritta Sawaengdee                                                                                                                                                                                                                       |
| see above                                                                                                                                                                                                                                                                                                                                                                                                                                                                                                                                                                                                                                                                                                                                                                                                                                                                                                                                                                                                                                                                                                                                                                                                                                                                                                                                                                                                                                                                                                                                                                                                                                                                                                                                                                                                                                                                                                                                                                                                                                                                                                                                                                                                                                                                                                                                                                                                                                                                                                                                                                                                                                                                                                                                                                                                                                                                                                                                                                                                                                                                                                                                                                                                                                                                                                                      |                                                                                                                         |                                                                                                                                                                                                                     |                                                                                                                                                                                                                                                                                                                                                                                                                            |

[illegible]

|                                                                                                                                                                                                                                                                                                                                                                                                                                                                                                                                                                                                                                                                                                                                                                                                                                                                                                                                                                                                                                                                                                                                                                                                                                                                                                                                                                                                                                                                                                                                                    |                                                                                                                         |                                                                                                                                                                                                                                                                                             |                                                                                                                                                                                                                                                    |
|----------------------------------------------------------------------------------------------------------------------------------------------------------------------------------------------------------------------------------------------------------------------------------------------------------------------------------------------------------------------------------------------------------------------------------------------------------------------------------------------------------------------------------------------------------------------------------------------------------------------------------------------------------------------------------------------------------------------------------------------------------------------------------------------------------------------------------------------------------------------------------------------------------------------------------------------------------------------------------------------------------------------------------------------------------------------------------------------------------------------------------------------------------------------------------------------------------------------------------------------------------------------------------------------------------------------------------------------------------------------------------------------------------------------------------------------------------------------------------------------------------------------------------------------------|-------------------------------------------------------------------------------------------------------------------------|---------------------------------------------------------------------------------------------------------------------------------------------------------------------------------------------------------------------------------------------------------------------------------------------|----------------------------------------------------------------------------------------------------------------------------------------------------------------------------------------------------------------------------------------------------|
| EPI_ISL_4106144                                                                                                                                                                                                                                                                                                                                                                                                                                                                                                                                                                                                                                                                                                                                                                                                                                                                                                                                                                                                                                                                                                                                                                                                                                                                                                                                                                                                                                                                                                                                    | Kasemrad Hospital Rattanaathibet                                                                                        | National Institute of Health, Department of Medical Sciences, Ministry of Public Health, Thailand                                                                                                                                                                                           | Archawin Rojanawiwat; Natchaya Khiahsang; Nuttida Thongpramol; Pakorn Piromtong; Pilailuk Okada; Ratana Tacharoenuang; Siripaporn Phuyugun; Sittiporn Parmmen; Sunthareeya Waicharoen; Thanutsapa Thanadachakul; Warawan Wongboot; sirikanda wimol |
| EPI_ISL_3827181, EPI_ISL_3827182, EPI_ISL_3827183, EPI_ISL_3827184, EPI_ISL_3827185, EPI_ISL_3827469                                                                                                                                                                                                                                                                                                                                                                                                                                                                                                                                                                                                                                                                                                                                                                                                                                                                                                                                                                                                                                                                                                                                                                                                                                                                                                                                                                                                                                               | Kasemrad hospital                                                                                                       | Division of Genomic Medicine and Innovation support,Department of Medical Sciences, Ministry of Public Health, Thailand                                                                                                                                                                     | Archawin Rojanawiwat; Jirapha Pakdee; Natthakul Bunneang; Nuanjun Wichukchinda; Penpittha Thawong; Pilailuk Akkapaiboon Okada; Pundharika Piboonsiri; Surakameth Mahasirimongkol; Waritta Sawaengdee                                               |
| EPI_ISL_2433295, EPI_ISL_2433307, EPI_ISL_2433313, EPI_ISL_2433315, EPI_ISL_2433364, EPI_ISL_2433365, EPI_ISL_2433366, EPI_ISL_2433367, EPI_ISL_2433368, EPI_ISL_2433369, EPI_ISL_2433370, EPI_ISL_2433371, EPI_ISL_2433372, EPI_ISL_2433373, EPI_ISL_2433374, EPI_ISL_2433375, EPI_ISL_2433376, EPI_ISL_2433377, EPI_ISL_2433378, EPI_ISL_2433379, EPI_ISL_2433572, EPI_ISL_2433573, EPI_ISL_2433574, EPI_ISL_2433575, EPI_ISL_2433576, EPI_ISL_2433577, EPI_ISL_2433578, EPI_ISL_2433579, EPI_ISL_2433580, EPI_ISL_2433581, EPI_ISL_2433582, EPI_ISL_2433583, EPI_ISL_2433584, EPI_ISL_2433585, EPI_ISL_2433586, EPI_ISL_2433587, EPI_ISL_2433588, EPI_ISL_2433589, EPI_ISL_2433590, EPI_ISL_2433591, EPI_ISL_2433592, EPI_ISL_2433593, EPI_ISL_2433594, EPI_ISL_2433595, EPI_ISL_2433596, EPI_ISL_2433597, EPI_ISL_2433598, EPI_ISL_2433599, EPI_ISL_2433600, EPI_ISL_2433601, EPI_ISL_2433602, EPI_ISL_2433603, EPI_ISL_2433604, EPI_ISL_2433605, EPI_ISL_2433606, EPI_ISL_2433607, EPI_ISL_2433608, EPI_ISL_2433609, EPI_ISL_2433610, EPI_ISL_2433611, EPI_ISL_2433612, EPI_ISL_2433613, EPI_ISL_2433614, EPI_ISL_2433615, EPI_ISL_2433616, EPI_ISL_2433617                                                                                                                                                                                                                                                                                                                                                                                   | Division of Genomic Medicine and Innovation support,Department of Medical Sciences, Ministry of Public Health, Thailand | Archawin Rojanawiwat; Jirapha Pakdee; Natthakul Bunneang; Nuanjun Wichukchinda; Penpittha Thawong; Pilailuk Akkapaiboon Okada; Pundharika Piboonsiri; Surakameth Mahasirimongkol; Waritta Sawaengdee                                                                                        |                                                                                                                                                                                                                                                    |
| see above                                                                                                                                                                                                                                                                                                                                                                                                                                                                                                                                                                                                                                                                                                                                                                                                                                                                                                                                                                                                                                                                                                                                                                                                                                                                                                                                                                                                                                                                                                                                          | Kasemrad international hospital                                                                                         | Division of Genomic Medicine and Innovation support,Department of Medical Sciences, Ministry of Public Health, Thailand                                                                                                                                                                     | Archawin Rojanawiwat; Jirapha Pakdee; Natthakul Bunneang; Nuanjun Wichukchinda; Penpittha Thawong; Pilailuk Akkapaiboon Okada; Pundharika Piboonsiri; Surakameth Mahasirimongkol; Waritta Sawaengdee                                               |
| EPI_ISL_2840605                                                                                                                                                                                                                                                                                                                                                                                                                                                                                                                                                                                                                                                                                                                                                                                                                                                                                                                                                                                                                                                                                                                                                                                                                                                                                                                                                                                                                                                                                                                                    | Kasemrad international hospital rattanathibeth                                                                          | National Institute of Health, Department of Medical Sciences, Ministry of Public Health, Thailand                                                                                                                                                                                           | : Natchaya Khiahsang; Nuttida Thongpramol; Pakorn Piromtong; Pilailuk Okada; Ratana Tacharoenuang; Siripaporn Phuyugun; Sittiporn Parmmen; Sunthareeya Waicharoen; Thanutsapa Thanadachakul; Warawan Wongboot; sirikanda wimol                     |
| EPI_ISL_2510689, EPI_ISL_4488503, EPI_ISL_4488505, EPI_ISL_4488507, EPI_ISL_4488511, EPI_ISL_4488513, EPI_ISL_4488515, EPI_ISL_4488517, EPI_ISL_4488521, EPI_ISL_4488523, EPI_ISL_4488525, EPI_ISL_4488527, EPI_ISL_4488528, EPI_ISL_4488529, EPI_ISL_4488530, EPI_ISL_4488531, EPI_ISL_4488533, EPI_ISL_4488535, EPI_ISL_4488537, EPI_ISL_4488539, EPI_ISL_4488541, EPI_ISL_4488542, EPI_ISL_4488544, EPI_ISL_4488546, EPI_ISL_4488549, EPI_ISL_4488551, EPI_ISL_4488552, EPI_ISL_4488554, EPI_ISL_4488556, EPI_ISL_4488561, EPI_ISL_4488563, EPI_ISL_4488571, EPI_ISL_4488572, EPI_ISL_4488573, EPI_ISL_4488575, EPI_ISL_4488577, EPI_ISL_4488581, EPI_ISL_4488583, EPI_ISL_4488587, EPI_ISL_4488589, EPI_ISL_4488591, EPI_ISL_4488592, EPI_ISL_4488594, EPI_ISL_4488596, EPI_ISL_4488598, EPI_ISL_4488600, EPI_ISL_4488602, EPI_ISL_4488605, EPI_ISL_4488606, EPI_ISL_4488608, EPI_ISL_4488610, EPI_ISL_4488614, EPI_ISL_4488617, EPI_ISL_4488619, EPI_ISL_4488621, EPI_ISL_4488623, EPI_ISL_4488625, EPI_ISL_4488626, EPI_ISL_4488628, EPI_ISL_4488630, EPI_ISL_4488632, EPI_ISL_4488636, EPI_ISL_4488640, EPI_ISL_4488642, EPI_ISL_4488644, EPI_ISL_4488646, EPI_ISL_4488647, EPI_ISL_4488649                                                                                                                                                                                                                                                                                                                                                 | Thai Red Cross Emerging Infectious Diseases Clinical Center and Faculty of Medicine, Chulalongkorn University           | Anthony R. Jones; Chonticha Klunghong; Gompol Suwanpinmoluk; Khajohn Joonlasak; Leilani Paitoonpong; Opass Putcharoen; Pattama Torvorapanit; Piyawon Chinnawirotpisan; Stefan Fernandez; Supaporn Wacharapluasadee; Torvorapanit Pattama; Watsamon Jantarabenjakul; Wuttichai Manasatienkij |                                                                                                                                                                                                                                                    |
| EPI_ISL_4647535, EPI_ISL_4647538, EPI_ISL_4647543, EPI_ISL_4647546, EPI_ISL_4647553, EPI_ISL_4647560, EPI_ISL_4647566                                                                                                                                                                                                                                                                                                                                                                                                                                                                                                                                                                                                                                                                                                                                                                                                                                                                                                                                                                                                                                                                                                                                                                                                                                                                                                                                                                                                                              | King Prajadhipok Memorial Hospital                                                                                      | Division of Genomic Medicine and Innovation support,Department of Medical Sciences, Ministry of Public Health, Thailand                                                                                                                                                                     | Archawin Rojanawiwat; Jirapha Pakdee; Natthakul Bunneang; Nuanjun Wichukchinda; Penpittha Thawong; Pilailuk Akkapaiboon Okada; Pundharika Piboonsiri; Surakameth Mahasirimongkol; Waritta Sawaengdee                                               |
| see above                                                                                                                                                                                                                                                                                                                                                                                                                                                                                                                                                                                                                                                                                                                                                                                                                                                                                                                                                                                                                                                                                                                                                                                                                                                                                                                                                                                                                                                                                                                                          | King Prajadhipok Memorial Hospital                                                                                      | Division of Genomic Medicine and Innovation support,Department of Medical Sciences, Ministry of Public Health, Thailand                                                                                                                                                                     | Archawin Rojanawiwat; Jirapha Pakdee; Natthakul Bunneang; Nuanjun Wichukchinda; Penpittha Thawong; Pilailuk Akkapaiboon Okada; Pundharika Piboonsiri; Surakameth Mahasirimongkol; Waritta Sawaengdee                                               |
| EPI_ISL_2433318, EPI_ISL_3826483, EPI_ISL_3826484, EPI_ISL_3826485, EPI_ISL_3826486, EPI_ISL_3826487, EPI_ISL_3826488, EPI_ISL_3826490, EPI_ISL_3826491, EPI_ISL_3826492, EPI_ISL_3826493, EPI_ISL_3826494, EPI_ISL_3826495, EPI_ISL_3826496, EPI_ISL_3826497, EPI_ISL_3826606, EPI_ISL_3826607, EPI_ISL_3826608, EPI_ISL_3826609, EPI_ISL_3826610, EPI_ISL_3826611, EPI_ISL_3826612, EPI_ISL_3826613, EPI_ISL_3826614, EPI_ISL_3826615, EPI_ISL_3826616, EPI_ISL_3826617, EPI_ISL_3826618, EPI_ISL_3826619, EPI_ISL_3826620, EPI_ISL_3826621, EPI_ISL_3826622, EPI_ISL_3826623, EPI_ISL_3826624, EPI_ISL_3826625, EPI_ISL_3826626, EPI_ISL_3826627, EPI_ISL_3826628, EPI_ISL_3826629, EPI_ISL_3826630, EPI_ISL_3826631, EPI_ISL_3826632, EPI_ISL_3826633, EPI_ISL_3826634, EPI_ISL_3826635, EPI_ISL_3826636, EPI_ISL_3826637, EPI_ISL_3826638, EPI_ISL_3826639, EPI_ISL_3826640, EPI_ISL_3826641, EPI_ISL_3826642, EPI_ISL_3826643, EPI_ISL_3826644, EPI_ISL_3826645, EPI_ISL_3826646, EPI_ISL_3826647, EPI_ISL_3826648, EPI_ISL_3826649, EPI_ISL_3826650, EPI_ISL_3826651, EPI_ISL_3826652, EPI_ISL_3826653, EPI_ISL_3826654, EPI_ISL_3826655, EPI_ISL_3826656, EPI_ISL_3826657, EPI_ISL_3826658, EPI_ISL_3826659, EPI_ISL_3826660, EPI_ISL_3826661, EPI_ISL_3826662, EPI_ISL_3826663, EPI_ISL_3826664, EPI_ISL_3826665, EPI_ISL_3826666, EPI_ISL_3826667, EPI_ISL_3826668, EPI_ISL_3826669, EPI_ISL_3826670, EPI_ISL_3826671, EPI_ISL_3826672, EPI_ISL_3826673, EPI_ISL_3826674, EPI_ISL_3826675, EPI_ISL_3826676, EPI_ISL_3826677, EPI_ISL_382 |                                                                                                                         |                                                                                                                                                                                                                                                                                             |                                                                                                                                                                                                                                                    |

|                                                                                                                                                                                                                                                                                                                                                                                                                                                                                                                                                                                                                                                                                                                                                                                                                                                                                                                                                                                                                                                                                                                                                                                                                                                                                                                                                                                                                                                                                                                                                                                                                                                                                                                                                                                                                                                                                                                                                                                                                                                                                                                                                                                                                                                                                                                                                                                                                                                                                                                                                                                                                                                                                                                                                                                                                                                            |                                                                                                   |                                                                                                                         |                                                                                                                                                                                                                                                                                                                                                                                                                                                            |                                                                                                                                                                                                                                                                                                                                                                                                                                                                                                                                                                                                                                                                                                                                                                                      |
|------------------------------------------------------------------------------------------------------------------------------------------------------------------------------------------------------------------------------------------------------------------------------------------------------------------------------------------------------------------------------------------------------------------------------------------------------------------------------------------------------------------------------------------------------------------------------------------------------------------------------------------------------------------------------------------------------------------------------------------------------------------------------------------------------------------------------------------------------------------------------------------------------------------------------------------------------------------------------------------------------------------------------------------------------------------------------------------------------------------------------------------------------------------------------------------------------------------------------------------------------------------------------------------------------------------------------------------------------------------------------------------------------------------------------------------------------------------------------------------------------------------------------------------------------------------------------------------------------------------------------------------------------------------------------------------------------------------------------------------------------------------------------------------------------------------------------------------------------------------------------------------------------------------------------------------------------------------------------------------------------------------------------------------------------------------------------------------------------------------------------------------------------------------------------------------------------------------------------------------------------------------------------------------------------------------------------------------------------------------------------------------------------------------------------------------------------------------------------------------------------------------------------------------------------------------------------------------------------------------------------------------------------------------------------------------------------------------------------------------------------------------------------------------------------------------------------------------------------------|---------------------------------------------------------------------------------------------------|-------------------------------------------------------------------------------------------------------------------------|------------------------------------------------------------------------------------------------------------------------------------------------------------------------------------------------------------------------------------------------------------------------------------------------------------------------------------------------------------------------------------------------------------------------------------------------------------|--------------------------------------------------------------------------------------------------------------------------------------------------------------------------------------------------------------------------------------------------------------------------------------------------------------------------------------------------------------------------------------------------------------------------------------------------------------------------------------------------------------------------------------------------------------------------------------------------------------------------------------------------------------------------------------------------------------------------------------------------------------------------------------|
| EPI_ISL_450197, EPI_ISL_455584, EPI_ISL_455589, EPI_ISL_455590, EPI_ISL_455591, EPI_ISL_455592, EPI_ISL_455593, EPI_ISL_455624, EPI_ISL_515287, EPI_ISL_515288, EPI_ISL_515289, EPI_ISL_515290, EPI_ISL_515291, EPI_ISL_515463, EPI_ISL_515470                                                                                                                                                                                                                                                                                                                                                                                                                                                                                                                                                                                                                                                                                                                                                                                                                                                                                                                                                                                                                                                                                                                                                                                                                                                                                                                                                                                                                                                                                                                                                                                                                                                                                                                                                                                                                                                                                                                                                                                                                                                                                                                                                                                                                                                                                                                                                                                                                                                                                                                                                                                                             |                                                                                                   |                                                                                                                         |                                                                                                                                                                                                                                                                                                                                                                                                                                                            |                                                                                                                                                                                                                                                                                                                                                                                                                                                                                                                                                                                                                                                                                                                                                                                      |
| see above                                                                                                                                                                                                                                                                                                                                                                                                                                                                                                                                                                                                                                                                                                                                                                                                                                                                                                                                                                                                                                                                                                                                                                                                                                                                                                                                                                                                                                                                                                                                                                                                                                                                                                                                                                                                                                                                                                                                                                                                                                                                                                                                                                                                                                                                                                                                                                                                                                                                                                                                                                                                                                                                                                                                                                                                                                                  | National Institute of Health, Department of medical Sciences, Ministry of Public Health, Thailand | National Institute of Health, Department of medical Sciences, Ministry of Public Health, Thailand                       | Chittaganpitch; Malinee; Okada; Parmmen; Phuygun; Pilailuk; Siripaporn; Sittiporn; Sunthareeya; Thanadachakul; Thanutsapa; Waicharoen; Warawan; Wongboot                                                                                                                                                                                                                                                                                                   |                                                                                                                                                                                                                                                                                                                                                                                                                                                                                                                                                                                                                                                                                                                                                                                      |
| EPI_ISL_3791305, EPI_ISL_3791308, EPI_ISL_4279185                                                                                                                                                                                                                                                                                                                                                                                                                                                                                                                                                                                                                                                                                                                                                                                                                                                                                                                                                                                                                                                                                                                                                                                                                                                                                                                                                                                                                                                                                                                                                                                                                                                                                                                                                                                                                                                                                                                                                                                                                                                                                                                                                                                                                                                                                                                                                                                                                                                                                                                                                                                                                                                                                                                                                                                                          | Navavej Hospital                                                                                  | COVID-19 Network Investigations (CONI) Alliance                                                                         | Angkana Huang; Anthony R. Jones; Arporn Wangwiwatsin; Bhakbhoom Panthan; Chonticha Klungtong; Duangkamon Loesbanluechai; Ekawat Pasomsub; Elizabeth Batty; Insee Sensor; Janjira Thaipadungpanit; Khajohn Joonlasak; Kingkan Rakmanee; Krittikorn Kumpornsin; Namfon Kotanan; Stefan Fernandez; Thanat Chookajorn; Theerarat Kochakarn; Treewat Watthanachockchai; Wasun Chantratita; Wuditchai Manasatienki                                               |                                                                                                                                                                                                                                                                                                                                                                                                                                                                                                                                                                                                                                                                                                                                                                                      |
| EPI_ISL_4262470                                                                                                                                                                                                                                                                                                                                                                                                                                                                                                                                                                                                                                                                                                                                                                                                                                                                                                                                                                                                                                                                                                                                                                                                                                                                                                                                                                                                                                                                                                                                                                                                                                                                                                                                                                                                                                                                                                                                                                                                                                                                                                                                                                                                                                                                                                                                                                                                                                                                                                                                                                                                                                                                                                                                                                                                                                            | Neurological Institute of Thailand                                                                | National Institute of Health, Department of Medical Sciences, Ministry of Public Health, Thailand                       | Archawin Rojanawiwat; Natchaya Khidsang; Nuttida Thongpramul; Pakorn Piromtong; Pilailuk Okada; Ratana Tacharoenmuang; Siripaporn Phuygun; Sittiporn Parmmen; Sunthareeya Waicharoen; Thanutsapa Thanadachakul; Warawan Wongboot; sirikanda wimol                                                                                                                                                                                                          |                                                                                                                                                                                                                                                                                                                                                                                                                                                                                                                                                                                                                                                                                                                                                                                      |
| EPI_ISL_1495998                                                                                                                                                                                                                                                                                                                                                                                                                                                                                                                                                                                                                                                                                                                                                                                                                                                                                                                                                                                                                                                                                                                                                                                                                                                                                                                                                                                                                                                                                                                                                                                                                                                                                                                                                                                                                                                                                                                                                                                                                                                                                                                                                                                                                                                                                                                                                                                                                                                                                                                                                                                                                                                                                                                                                                                                                                            | NewGen Laboratory Medical Technology Clinic                                                       | National Institute of Health, Department of Medical Sciences, Ministry of Public Health, Thailand                       | Hathaikan Tanchai; Natchaya Khidsang; Nuttida Thongpramul; Pakorn Piromtong; Pilailuk Okada; Ratana Tacharoenmuang; Siripaporn Phuygun; Sittiporn Parmmen; Sunthareeya Waicharoen.; Thanutsapa Thanadachakul                                                                                                                                                                                                                                               |                                                                                                                                                                                                                                                                                                                                                                                                                                                                                                                                                                                                                                                                                                                                                                                      |
| EPI_ISL_3827387, EPI_ISL_3827389                                                                                                                                                                                                                                                                                                                                                                                                                                                                                                                                                                                                                                                                                                                                                                                                                                                                                                                                                                                                                                                                                                                                                                                                                                                                                                                                                                                                                                                                                                                                                                                                                                                                                                                                                                                                                                                                                                                                                                                                                                                                                                                                                                                                                                                                                                                                                                                                                                                                                                                                                                                                                                                                                                                                                                                                                           | Nong Han Hospital                                                                                 | Division of Genomic Medicine and Innovation support,Department of Medical Sciences, Ministry of Public Health, Thailand | Archawin Rojanawiwat; Jirapha Pakdee; Natthakul Bunneang; Nuanjun Wichukchinda; Penpitcha Thawong; Pilailuk Akkapaiboon Okada; Pundharika Piboonsiri; Surakameth Mahasirimongkol; Waritta Sawaengdee                                                                                                                                                                                                                                                       |                                                                                                                                                                                                                                                                                                                                                                                                                                                                                                                                                                                                                                                                                                                                                                                      |
| EPI_ISL_3827381, EPI_ISL_3827382, EPI_ISL_3827383, EPI_ISL_3827384                                                                                                                                                                                                                                                                                                                                                                                                                                                                                                                                                                                                                                                                                                                                                                                                                                                                                                                                                                                                                                                                                                                                                                                                                                                                                                                                                                                                                                                                                                                                                                                                                                                                                                                                                                                                                                                                                                                                                                                                                                                                                                                                                                                                                                                                                                                                                                                                                                                                                                                                                                                                                                                                                                                                                                                         | Nonghin Hospital                                                                                  | Division of Genomic Medicine and Innovation support,Department of Medical Sciences, Ministry of Public Health, Thailand | Archawin Rojanawiwat; Jirapha Pakdee; Natthakul Bunneang; Nuanjun Wichukchinda; Penpitcha Thawong; Pilailuk Akkapaiboon Okada; Pundharika Piboonsiri; Surakameth Mahasirimongkol; Waritta Sawaengdee                                                                                                                                                                                                                                                       |                                                                                                                                                                                                                                                                                                                                                                                                                                                                                                                                                                                                                                                                                                                                                                                      |
| EPI_ISL_3827369                                                                                                                                                                                                                                                                                                                                                                                                                                                                                                                                                                                                                                                                                                                                                                                                                                                                                                                                                                                                                                                                                                                                                                                                                                                                                                                                                                                                                                                                                                                                                                                                                                                                                                                                                                                                                                                                                                                                                                                                                                                                                                                                                                                                                                                                                                                                                                                                                                                                                                                                                                                                                                                                                                                                                                                                                                            | Nongkhai Hospital                                                                                 | Division of Genomic Medicine and Innovation support,Department of Medical Sciences, Ministry of Public Health, Thailand | Archawin Rojanawiwat; Jirapha Pakdee; Natthakul Bunneang; Nuanjun Wichukchinda; Penpitcha Thawong; Pilailuk Akkapaiboon Okada; Pundharika Piboonsiri; Surakameth Mahasirimongkol; Waritta Sawaengdee                                                                                                                                                                                                                                                       |                                                                                                                                                                                                                                                                                                                                                                                                                                                                                                                                                                                                                                                                                                                                                                                      |
| EPI_ISL_3827431                                                                                                                                                                                                                                                                                                                                                                                                                                                                                                                                                                                                                                                                                                                                                                                                                                                                                                                                                                                                                                                                                                                                                                                                                                                                                                                                                                                                                                                                                                                                                                                                                                                                                                                                                                                                                                                                                                                                                                                                                                                                                                                                                                                                                                                                                                                                                                                                                                                                                                                                                                                                                                                                                                                                                                                                                                            | Nonsaad Hospital                                                                                  | Division of Genomic Medicine and Innovation support,Department of Medical Sciences, Ministry of Public Health, Thailand | Archawin Rojanawiwat; Jirapha Pakdee; Natthakul Bunneang; Nuanjun Wichukchinda; Penpitcha Thawong; Pilailuk Akkapaiboon Okada; Pundharika Piboonsiri; Surakameth Mahasirimongkol; Waritta Sawaengdee                                                                                                                                                                                                                                                       |                                                                                                                                                                                                                                                                                                                                                                                                                                                                                                                                                                                                                                                                                                                                                                                      |
| EPI_ISL_3403346, EPI_ISL_3403347, EPI_ISL_3403348, EPI_ISL_3403349, EPI_ISL_3407817, EPI_ISL_3407826, EPI_ISL_3407838                                                                                                                                                                                                                                                                                                                                                                                                                                                                                                                                                                                                                                                                                                                                                                                                                                                                                                                                                                                                                                                                                                                                                                                                                                                                                                                                                                                                                                                                                                                                                                                                                                                                                                                                                                                                                                                                                                                                                                                                                                                                                                                                                                                                                                                                                                                                                                                                                                                                                                                                                                                                                                                                                                                                      |                                                                                                   |                                                                                                                         |                                                                                                                                                                                                                                                                                                                                                                                                                                                            |                                                                                                                                                                                                                                                                                                                                                                                                                                                                                                                                                                                                                                                                                                                                                                                      |
| see above                                                                                                                                                                                                                                                                                                                                                                                                                                                                                                                                                                                                                                                                                                                                                                                                                                                                                                                                                                                                                                                                                                                                                                                                                                                                                                                                                                                                                                                                                                                                                                                                                                                                                                                                                                                                                                                                                                                                                                                                                                                                                                                                                                                                                                                                                                                                                                                                                                                                                                                                                                                                                                                                                                                                                                                                                                                  | Nonthaburi Public Health Office                                                                   | National Institute of Health, Department of Medical Sciences, Ministry of Public Health, Thailand                       | ; Natchaya Khidsang; Nuttida Thongpramul; Pakorn Piromtong; Pilailuk Okada; Ratana Tacharoenmuang; Siripaporn Phuygun; Sittiporn Parmmen; Sunthareeya Waicharoen; Thanutsapa Thanadachakul; Warawan Wongboot; sirikanda wimol                                                                                                                                                                                                                              |                                                                                                                                                                                                                                                                                                                                                                                                                                                                                                                                                                                                                                                                                                                                                                                      |
| EPI_ISL_3827346, EPI_ISL_3827347, EPI_ISL_3827348, EPI_ISL_3827349, EPI_ISL_3827350, EPI_ISL_3827351, EPI_ISL_3827352, EPI_ISL_3827353, EPI_ISL_3827354, EPI_ISL_3827355                                                                                                                                                                                                                                                                                                                                                                                                                                                                                                                                                                                                                                                                                                                                                                                                                                                                                                                                                                                                                                                                                                                                                                                                                                                                                                                                                                                                                                                                                                                                                                                                                                                                                                                                                                                                                                                                                                                                                                                                                                                                                                                                                                                                                                                                                                                                                                                                                                                                                                                                                                                                                                                                                   | Occicare Medical Center                                                                           | Division of Genomic Medicine and Innovation support,Department of Medical Sciences, Ministry of Public Health, Thailand | Archawin Rojanawiwat; Jirapha Pakdee; Natthakul Bunneang; Nuanjun Wichukchinda; Penpitcha Thawong; Pilailuk Akkapaiboon Okada; Pundharika Piboonsiri; Surakameth Mahasirimongkol; Waritta Sawaengdee                                                                                                                                                                                                                                                       |                                                                                                                                                                                                                                                                                                                                                                                                                                                                                                                                                                                                                                                                                                                                                                                      |
| EPI_ISL_4647659                                                                                                                                                                                                                                                                                                                                                                                                                                                                                                                                                                                                                                                                                                                                                                                                                                                                                                                                                                                                                                                                                                                                                                                                                                                                                                                                                                                                                                                                                                                                                                                                                                                                                                                                                                                                                                                                                                                                                                                                                                                                                                                                                                                                                                                                                                                                                                                                                                                                                                                                                                                                                                                                                                                                                                                                                                            | Office of Disease Prevention and Control Region 11 Nakhon Si Thammarat                            | Division of Genomic Medicine and Innovation support,Department of Medical Sciences, Ministry of Public Health, Thailand | Archawin Rojanawiwat; Jirapha Pakdee; Natthakul Bunneang; Nuanjun Wichukchinda; Penpitcha Thawong; Pilailuk Akkapaiboon Okada; Pundharika Piboonsiri; Surakameth Mahasirimongkol; Waritta Sawaengdee                                                                                                                                                                                                                                                       |                                                                                                                                                                                                                                                                                                                                                                                                                                                                                                                                                                                                                                                                                                                                                                                      |
| EPI_ISL_2233453                                                                                                                                                                                                                                                                                                                                                                                                                                                                                                                                                                                                                                                                                                                                                                                                                                                                                                                                                                                                                                                                                                                                                                                                                                                                                                                                                                                                                                                                                                                                                                                                                                                                                                                                                                                                                                                                                                                                                                                                                                                                                                                                                                                                                                                                                                                                                                                                                                                                                                                                                                                                                                                                                                                                                                                                                                            | Office of Disease Prevention and Control Region 12 Songkhla                                       | COVID-19 Network Investigations (CONI) Alliance                                                                         | Angkana Huang; Anthony R. Jones; Arporn Wangwiwatsin; Bhakbhoom Panthan; Chonticha Klungtong; Duangkamon Loesbanluechai; Ekawat Pasomsub; Elizabeth Batty; Insee Sensor; Janjira Thaipadungpanit; Khajohn Joonlasak; Kingkan Rakmanee; Krittikorn Kumpornsin; Namfon Kotanan; Sawanya Chantutanon; Stefan Fernandez; Thanat Chookajorn; Theerarat Kochakarn; Treewat Watthanachockchai; Wasun Chantratita; Wiphaporn Thabthimthong; Wuditchai Manasatienki |                                                                                                                                                                                                                                                                                                                                                                                                                                                                                                                                                                                                                                                                                                                                                                                      |
| EPI_ISL_2348804, EPI_ISL_2348805, EPI_ISL_2348819, EPI_ISL_2348820, EPI_ISL_2348821, EPI_ISL_2348822, EPI_ISL_2348835, EPI_ISL_2348836, EPI_ISL_2678111, EPI_ISL_2678112, EPI_ISL_2678113                                                                                                                                                                                                                                                                                                                                                                                                                                                                                                                                                                                                                                                                                                                                                                                                                                                                                                                                                                                                                                                                                                                                                                                                                                                                                                                                                                                                                                                                                                                                                                                                                                                                                                                                                                                                                                                                                                                                                                                                                                                                                                                                                                                                                                                                                                                                                                                                                                                                                                                                                                                                                                                                  |                                                                                                   |                                                                                                                         |                                                                                                                                                                                                                                                                                                                                                                                                                                                            |                                                                                                                                                                                                                                                                                                                                                                                                                                                                                                                                                                                                                                                                                                                                                                                      |
| see above                                                                                                                                                                                                                                                                                                                                                                                                                                                                                                                                                                                                                                                                                                                                                                                                                                                                                                                                                                                                                                                                                                                                                                                                                                                                                                                                                                                                                                                                                                                                                                                                                                                                                                                                                                                                                                                                                                                                                                                                                                                                                                                                                                                                                                                                                                                                                                                                                                                                                                                                                                                                                                                                                                                                                                                                                                                  | Office of Diseases Prevention and Control Region 12 Songkhla                                      | COVID-19 Network Investigations (CONI) Alliance                                                                         | Angkana Huang; Anthony R. Jones; Arporn Wangwiwatsin; Bhakbhoom Panthan; Chonticha Klungtong; Duangkamon Loesbanluechai; Ekawat Pasomsub; Elizabeth Batty; Insee Sensor; Janjira Thaipadungpanit; Khajohn Joonlasak; Kingkan Rakmanee; Krittikorn Kumpornsin; Namfon Kotanan; Sawanya Chantutanon; Stefan Fernandez; Thanat Chookajorn; Theerarat Kochakarn; Treewat Watthanachockchai; Wasun Chantratita; Wiphaporn Thabthimthong; Wuditchai Manasatienki |                                                                                                                                                                                                                                                                                                                                                                                                                                                                                                                                                                                                                                                                                                                                                                                      |
| EPI_ISL_882772, EPI_ISL_882795, EPI_ISL_882796, EPI_ISL_882797, EPI_ISL_882798, EPI_ISL_882799, EPI_ISL_1073956, EPI_ISL_1073957, EPI_ISL_1073959, EPI_ISL_1073961, EPI_ISL_1073962, EPI_ISL_1073963, EPI_ISL_1073965, EPI_ISL_1073981, EPI_ISL_1073982, EPI_ISL_1073983, EPI_ISL_1073984, EPI_ISL_1073985, EPI_ISL_1073986, EPI_ISL_1073987, EPI_ISL_1073988, EPI_ISL_1073989, EPI_ISL_1073990, EPI_ISL_1073991, EPI_ISL_1073992, EPI_ISL_1073993, EPI_ISL_1073994, EPI_ISL_1073995, EPI_ISL_1073996, EPI_ISL_1073997, EPI_ISL_1073998, EPI_ISL_1073999, EPI_ISL_1074000, EPI_ISL_1074001, EPI_ISL_1074002, EPI_ISL_1074003, EPI_ISL_1074004, EPI_ISL_1074005, EPI_ISL_1074006, EPI_ISL_1074007, EPI_ISL_1074008, EPI_ISL_1074009, EPI_ISL_1074010, EPI_ISL_1074011, EPI_ISL_1074012, EPI_ISL_1074013, EPI_ISL_1074014, EPI_ISL_1074015, EPI_ISL_1074016, EPI_ISL_1074017, EPI_ISL_1074018, EPI_ISL_1074019, EPI_ISL_1074020, EPI_ISL_1074021, EPI_ISL_1074022, EPI_ISL_1074023, EPI_ISL_1074024, EPI_ISL_1074025, EPI_ISL_1074026, EPI_ISL_1074027, EPI_ISL_1074028, EPI_ISL_1074029, EPI_ISL_1074030, EPI_ISL_1074031, EPI_ISL_1074032, EPI_ISL_1074033, EPI_ISL_1074034, EPI_ISL_1074035, EPI_ISL_1074036, EPI_ISL_1074037, EPI_ISL_1074038, EPI_ISL_1074039, EPI_ISL_1074040, EPI_ISL_1074041, EPI_ISL_1074042, EPI_ISL_1074043, EPI_ISL_1074044, EPI_ISL_1074045, EPI_ISL_1074046, EPI_ISL_1074047, EPI_ISL_1074048, EPI_ISL_1074049, EPI_ISL_1074050, EPI_ISL_1074051, EPI_ISL_1074052, EPI_ISL_1074053, EPI_ISL_1074054, EPI_ISL_1074055, EPI_ISL_1074056, EPI_ISL_1074057, EPI_ISL_1074058, EPI_ISL_1074059, EPI_ISL_1074060, EPI_ISL_1074061, EPI_ISL_1074062, EPI_ISL_1074063, EPI_ISL_1074064, EPI_ISL_1074065, EPI_ISL_1074066, EPI_ISL_1074067, EPI_ISL_1074068, EPI_ISL_1074069, EPI_ISL_1074070, EPI_ISL_1074071, EPI_ISL_1074072, EPI_ISL_1074073, EPI_ISL_1074074, EPI_ISL_1074075, EPI_ISL_1074076, EPI_ISL_1074077, EPI_ISL_1074078, EPI_ISL_1074079, EPI_ISL_1074080, EPI_ISL_1074081, EPI_ISL_1074082, EPI_ISL_1074083, EPI_ISL_1074084, EPI_ISL_1074085, EPI_ISL_1074086, EPI_ISL_1074087, EPI_ISL_1074088, EPI_ISL_1074089, EPI_ISL_1074090, EPI_ISL_1074091, EPI_ISL_1074092, EPI_ISL_1074093, EPI_ISL_1074094, EPI_ISL_1074095, EPI_ISL_1074096, EPI_ISL_1074097, EPI_ISL_1074098, EPI_ISL_1074099, EPI_ISL_1074100, EPI_ISL_1074101, EPI_ISL_1074102, EPI_ISL_1074103, EPI_ISL_1074104, EPI_ISL_1074105, EPI_ISL_1074106, EPI_ISL_1074107, EPI_ISL_1074108, EPI_ISL_1074109, EPI_ISL_1074110, EPI_ISL_1074111, EPI_ISL_1074112, EPI_ISL_1074113, EPI_ISL_1074114, EPI_ISL_1074115, EPI_ISL_1074116, EPI_ISL_1074117, EPI_ISL_1074118, EPI_ISL_1074119, EPI_ISL_1074120, EPI_ISL_1074121, EPI_ISL_1074122, EPI_ISL_1074123, EPI_ISL_1074124, EPI_ISL_1074125, EPI_ISL_1074126, EPI_ISL_1074127, EPI_ISL_1074128, EPI_ISL_1074129 | see above                                                                                         | Office of Diseases Prevention and Control Region 4 Saraburi                                                             | COVID-19 Network Investigations (CONI) Alliance                                                                                                                                                                                                                                                                                                                                                                                                            | Amornmas Kongkleng; Anek Mungaomklang; Angkana Huang; Anthony R. Jones; Arporn Wangwiwatsin; Bhakbhoom Panthan; Chonticha Klungtong; Duangkamon Loesbanluechai; Ekawat Pasomsub; Elizabeth Batty; Insee Sensor; Janjira Thaipadungpanit; Jutikul Kaewmalakul; Kamolthip Atsawararnunt; Khajohn Joonlasak; Khajohn Joonsalak; Kingkan Rakmanee; Krittikorn Kumpornsin; Namfon Kotanan; Nathamon Runnachot; Pakjira Rimdusi; Payon Pengyo; Praima Moonmuang; Prayuth Kaewmalang; Pukkapon Parnwijitkul; Sataporn Hatsadichart; Sirinapa Singthong; Siriporn Lakesukthorn; Sirivan Yaemnimnual; Stefan Fernandez; Suttiruk Changchawai; Thanat Chookajorn; Theerarat Kochakarn; Treewat Watthanachockchai; Vichan Pawun; Wasun Chantratita; Wonvimol Lemprasert; Wuditchai Manasatienki |
| EPI_ISL_4647408                                                                                                                                                                                                                                                                                                                                                                                                                                                                                                                                                                                                                                                                                                                                                                                                                                                                                                                                                                                                                                                                                                                                                                                                                                                                                                                                                                                                                                                                                                                                                                                                                                                                                                                                                                                                                                                                                                                                                                                                                                                                                                                                                                                                                                                                                                                                                                                                                                                                                                                                                                                                                                                                                                                                                                                                                                            | PUBLIC HEALTH SERVICE CENTER 39, RAT BURANA                                                       | Division of Genomic Medicine and Innovation support,Department of Medical Sciences, Ministry of Public Health, Thailand | Archawin Rojanawiwat; Jirapha Pakdee; Natthakul Bunneang; Nuanjun Wichukchinda; Penpitcha Thawong; Pilailuk Akkapaiboon Okada; Pundharika Piboonsiri; Surakameth Mahasirimongkol; Waritta Sawaengdee                                                                                                                                                                                                                                                       |                                                                                                                                                                                                                                                                                                                                                                                                                                                                                                                                                                                                                                                                                                                                                                                      |
| EPI_ISL_4647318, EPI_ISL_4647426                                                                                                                                                                                                                                                                                                                                                                                                                                                                                                                                                                                                                                                                                                                                                                                                                                                                                                                                                                                                                                                                                                                                                                                                                                                                                                                                                                                                                                                                                                                                                                                                                                                                                                                                                                                                                                                                                                                                                                                                                                                                                                                                                                                                                                                                                                                                                                                                                                                                                                                                                                                                                                                                                                                                                                                                                           | PUBLIC HEALTH SERVICE CENTER 46, KANTARAT UTHIT                                                   | Division of Genomic Medicine and Innovation support,Department of Medical Sciences, Ministry of Public Health, Thailand | Archawin Rojanawiwat; Jirapha Pakdee; Natthakul Bunneang; Nuanjun Wichukchinda; Penpitcha Thawong; Pilailuk Akkapaiboon Okada; Pundharika Piboonsiri; Surakameth Mahasirimongkol; Waritta Sawaengdee                                                                                                                                                                                                                                                       |                                                                                                                                                                                                                                                                                                                                                                                                                                                                                                                                                                                                                                                                                                                                                                                      |
| EPI_ISL_4647298, EPI_ISL_4647308                                                                                                                                                                                                                                                                                                                                                                                                                                                                                                                                                                                                                                                                                                                                                                                                                                                                                                                                                                                                                                                                                                                                                                                                                                                                                                                                                                                                                                                                                                                                                                                                                                                                                                                                                                                                                                                                                                                                                                                                                                                                                                                                                                                                                                                                                                                                                                                                                                                                                                                                                                                                                                                                                                                                                                                                                           | PUBLIC HEALTH SERVICE CENTER 53, THUNG SONG HONG                                                  | Division of Genomic Medicine and Innovation support,Department of Medical Sciences, Ministry of Public Health, Thailand | Archawin Rojanawiwat; Jirapha Pakdee; Natthakul Bunneang; Nuanjun Wichukchinda; Penpitcha Thawong; Pilailuk Akkapaiboon Okada; Pundharika Piboonsiri; Surakameth Mahasirimongkol; Waritta Sawaengdee                                                                                                                                                                                                                                                       |                                                                                                                                                                                                                                                                                                                                                                                                                                                                                                                                                                                                                                                                                                                                                                                      |
| EPI_ISL_4647392                                                                                                                                                                                                                                                                                                                                                                                                                                                                                                                                                                                                                                                                                                                                                                                                                                                                                                                                                                                                                                                                                                                                                                                                                                                                                                                                                                                                                                                                                                                                                                                                                                                                                                                                                                                                                                                                                                                                                                                                                                                                                                                                                                                                                                                                                                                                                                                                                                                                                                                                                                                                                                                                                                                                                                                                                                            | PUBLIC HEALTH SERVICE CENTER 54 (THAT IAM)                                                        | Division of Genomic Medicine and Innovation support,Department of Medical Sciences, Ministry of Public Health, Thailand | Archawin Rojanawiwat; Jirapha Pakdee; Natthakul Bunneang; Nuanjun Wichukchinda; Penpitcha Thawong; Pilailuk Akkapaiboon Okada; Pundharika Piboonsiri; Surakameth Mahasirimongkol; Waritta Sawaengdee                                                                                                                                                                                                                                                       |                                                                                                                                                                                                                                                                                                                                                                                                                                                                                                                                                                                                                                                                                                                                                                                      |
| EPI_ISL_4647350, EPI_ISL_4647374, EPI_ISL_4647433, EPI_ISL_4647438, EPI_ISL_4647444                                                                                                                                                                                                                                                                                                                                                                                                                                                                                                                                                                                                                                                                                                                                                                                                                                                                                                                                                                                                                                                                                                                                                                                                                                                                                                                                                                                                                                                                                                                                                                                                                                                                                                                                                                                                                                                                                                                                                                                                                                                                                                                                                                                                                                                                                                                                                                                                                                                                                                                                                                                                                                                                                                                                                                        | PUBLIC HEALTH SERVICE CENTER 59, THUNG KHRU 2                                                     | Division of Genomic Medicine and Innovation support,Department of Medical Sciences, Ministry of Public Health, Thailand | Archawin Rojanawiwat; Jirapha Pakdee; Natthakul Bunneang; Nuanjun Wichukchinda; Penpitcha Thawong; Pilailuk Akkapaiboon Okada; Pundharika Piboonsiri; Surakameth Mahasirimongkol; Waritta Sawaengdee                                                                                                                                                                                                                                                       |                                                                                                                                                                                                                                                                                                                                                                                                                                                                                                                                                                                                                                                                                                                                                                                      |
| EPI_ISL_455605                                                                                                                                                                                                                                                                                                                                                                                                                                                                                                                                                                                                                                                                                                                                                                                                                                                                                                                                                                                                                                                                                                                                                                                                                                                                                                                                                                                                                                                                                                                                                                                                                                                                                                                                                                                                                                                                                                                                                                                                                                                                                                                                                                                                                                                                                                                                                                                                                                                                                                                                                                                                                                                                                                                                                                                                                                             | Panyananthaphikkhu Chonprathan Medical Center                                                     | National Institute of Health, Department of medical Sciences, Ministry of Public Health, Thailand                       | Chittaganpitch; Malinee; Okada; Parmmen; Phuygun; Pilailuk; Siripaporn; Sittiporn; Sunthareeya; Thanadachakul; Thanutsapa; Waicharoen; Warawan; Wongboot                                                                                                                                                                                                                                                                                                   |                                                                                                                                                                                                                                                                                                                                                                                                                                                                                                                                                                                                                                                                                                                                                                                      |
| EPI_ISL_434701                                                                                                                                                                                                                                                                                                                                                                                                                                                                                                                                                                                                                                                                                                                                                                                                                                                                                                                                                                                                                                                                                                                                                                                                                                                                                                                                                                                                                                                                                                                                                                                                                                                                                                                                                                                                                                                                                                                                                                                                                                                                                                                                                                                                                                                                                                                                                                                                                                                                                                                                                                                                                                                                                                                                                                                                                                             | Panyanunthaphikkhu Chonprathan Medical Center (PCMC)                                              | National Institute of Health, Department of medical Sciences, Ministry of Public Health, Thailand                       | Chittaganpitch; Malinee; Okada; Parmmen; Phuygun; Pilailuk; Siripaporn; Sittiporn; Sunthareeya; Thanadachakul; Thanutsapa; Waicharoen; Warawan; Wongboot                                                                                                                                                                                                                                                                                                   |                                                                                                                                                                                                                                                                                                                                                                                                                                                                                                                                                                                                                                                                                                                                                                                      |
| EPI_ISL_1251227                                                                                                                                                                                                                                                                                                                                                                                                                                                                                                                                                                                                                                                                                                                                                                                                                                                                                                                                                                                                                                                                                                                                                                                                                                                                                                                                                                                                                                                                                                                                                                                                                                                                                                                                                                                                                                                                                                                                                                                                                                                                                                                                                                                                                                                                                                                                                                                                                                                                                                                                                                                                                                                                                                                                                                                                                                            | Paolo Hospital Rangsit                                                                            | National Institute of Health, Department of Medical Sciences, Ministry of Public Health, Thailand                       | Hathaikan Tanchai; Natchaya Khidsang; Nuttida Thongpramul; Pakorn Piromtong; Pilailuk Okada; Ratana Tacharoenmuang; Siripaporn Phuygun; Sittiporn Parmmen; Sunthareeya Waicharoen.; Thanutsapa Thanadachakul                                                                                                                                                                                                                                               |                                                                                                                                                                                                                                                                                                                                                                                                                                                                                                                                                                                                                                                                                                                                                                                      |
| EPI_ISL_3827174, EPI_ISL_3827330, EPI_ISL_3827331                                                                                                                                                                                                                                                                                                                                                                                                                                                                                                                                                                                                                                                                                                                                                                                                                                                                                                                                                                                                                                                                                                                                                                                                                                                                                                                                                                                                                                                                                                                                                                                                                                                                                                                                                                                                                                                                                                                                                                                                                                                                                                                                                                                                                                                                                                                                                                                                                                                                                                                                                                                                                                                                                                                                                                                                          | Pasang Hospital                                                                                   | Division of Genomic Medicine and Innovation support,Department of Medical Sciences, Ministry of Public Health, Thailand | Archawin Rojanawiwat; Jirapha Pakdee; Natthakul Bunneang; Nuanjun Wichukchinda; Penpitcha Thawong; Pilailuk Akkapaiboon Okada; Pundharika Piboonsiri; Surakameth Mahasirimongkol; Waritta Sawaengdee                                                                                                                                                                                                                                                       |                                                                                                                                                                                                                                                                                                                                                                                                                                                                                                                                                                                                                                                                                                                                                                                      |
| EPI_ISL_2433291, EPI_ISL_2433319, EPI_ISL_2433555, EPI_ISL_2433646                                                                                                                                                                                                                                                                                                                                                                                                                                                                                                                                                                                                                                                                                                                                                                                                                                                                                                                                                                                                                                                                                                                                                                                                                                                                                                                                                                                                                                                                                                                                                                                                                                                                                                                                                                                                                                                                                                                                                                                                                                                                                                                                                                                                                                                                                                                                                                                                                                                                                                                                                                                                                                                                                                                                                                                         | Pattani Hoapital                                                                                  | Division of Genomic Medicine and Innovation support,Department of Medical Sciences, Ministry of Public Health, Thailand | Archawin Rojanawiwat; Jirapha Pakdee; Natthakul Bunneang; Nuanjun Wichukchinda; Penpitcha Thawong; Pilailuk Akkapaiboon Okada; Pundharika Piboonsiri; Surakameth Mahasirimongkol; Waritta Sawaengdee                                                                                                                                                                                                                                                       |                                                                                                                                                                                                                                                                                                                                                                                                                                                                                                                                                                                                                                                                                                                                                                                      |
| EPI_ISL_3827299, EPI_ISL_3827300, EPI_ISL_3827301, EPI_ISL_3827302, EPI_ISL_3827303, EPI_ISL_3827397, EPI_ISL_3827442, EPI_ISL_3827444, EPI_ISL_3827445, EPI_ISL_3827448, EPI_ISL_3827473                                                                                                                                                                                                                                                                                                                                                                                                                                                                                                                                                                                                                                                                                                                                                                                                                                                                                                                                                                                                                                                                                                                                                                                                                                                                                                                                                                                                                                                                                                                                                                                                                                                                                                                                                                                                                                                                                                                                                                                                                                                                                                                                                                                                                                                                                                                                                                                                                                                                                                                                                                                                                                                                  | see above                                                                                         | Phayao Hospital                                                                                                         | Division of Genomic Medicine and Innovation support,Department of Medical Sciences, Ministry of Public Health, Thailand                                                                                                                                                                                                                                                                                                                                    |                                                                                                                                                                                                                                                                                                                                                                                                                                                                                                                                                                                                                                                                                                                                                                                      |
| EPI_ISL_3827308, EPI_ISL_3827309, EPI_ISL_3827310, EPI_ISL_3827311, EPI_ISL_3827312, EPI_ISL_3827313, EPI_ISL_3827314, EPI_ISL_3827315                                                                                                                                                                                                                                                                                                                                                                                                                                                                                                                                                                                                                                                                                                                                                                                                                                                                                                                                                                                                                                                                                                                                                                                                                                                                                                                                                                                                                                                                                                                                                                                                                                                                                                                                                                                                                                                                                                                                                                                                                                                                                                                                                                                                                                                                                                                                                                                                                                                                                                                                                                                                                                                                                                                     | see above                                                                                         | Phayao Ram Hospital                                                                                                     | Division of Genomic Medicine and Innovation support,Department of Medical Sciences, Ministry of Public Health, Thailand                                                                                                                                                                                                                                                                                                                                    |                                                                                                                                                                                                                                                                                                                                                                                                                                                                                                                                                                                                                                                                                                                                                                                      |
| EPI_ISL_2346471, EPI_ISL_2348489, EPI_ISL_2348490                                                                                                                                                                                                                                                                                                                                                                                                                                                                                                                                                                                                                                                                                                                                                                                                                                                                                                                                                                                                                                                                                                                                                                                                                                                                                                                                                                                                                                                                                                                                                                                                                                                                                                                                                                                                                                                                                                                                                                                                                                                                                                                                                                                                                                                                                                                                                                                                                                                                                                                                                                                                                                                                                                                                                                                                          | Phra Chom Klao Hospital                                                                           | Division of Genomic medicine and Innonation support,Department of medical Sciences, Ministry of Public Health, Thailand | Archawin Rojanawiwat; Jirapha Pakdee; Natthakul Bunneang; Nuanjun Wichukchinda; Penpitcha Thawong; Pilailuk Akkapaiboon Okada; Pundharika Piboonsiri; Surakameth Mahasirimongkol; Waritta Sawaengdee                                                                                                                                                                                                                                                       |                                                                                                                                                                                                                                                                                                                                                                                                                                                                                                                                                                                                                                                                                                                                                                                      |
| EPI_ISL_3665961                                                                                                                                                                                                                                                                                                                                                                                                                                                                                                                                                                                                                                                                                                                                                                                                                                                                                                                                                                                                                                                                                                                                                                                                                                                                                                                                                                                                                                                                                                                                                                                                                                                                                                                                                                                                                                                                                                                                                                                                                                                                                                                                                                                                                                                                                                                                                                                                                                                                                                                                                                                                                                                                                                                                                                                                                                            | Phra Chom Klao Hospital                                                                           | National Institute of Health, Department of Medical Sciences, Ministry of Public Health, Thailand                       | ; Natchaya Khidsang; Nuttida Thongpramul; Pakorn Piromtong; Pilailuk Okada; Ratana Tacharoenmuang; Siripaporn Phuygun; Sittiporn Parmmen; Sunthareeya Waicharoen; Thanutsapa Thanadachakul; Warawan Wongboot; sirikanda wimol                                                                                                                                                                                                                              |                                                                                                                                                                                                                                                                                                                                                                                                                                                                                                                                                                                                                                                                                                                                                                                      |
| EPI_ISL_3406997, EPI_ISL_3406998, EPI_ISL_4635437                                                                                                                                                                                                                                                                                                                                                                                                                                                                                                                                                                                                                                                                                                                                                                                                                                                                                                                                                                                                                                                                                                                                                                                                                                                                                                                                                                                                                                                                                                                                                                                                                                                                                                                                                                                                                                                                                                                                                                                                                                                                                                                                                                                                                                                                                                                                                                                                                                                                                                                                                                                                                                                                                                                                                                                                          | Phra Nang Klao Hospital                                                                           | National Institute of Health, Department of Medical Sciences, Ministry of Public Health, Thailand                       | ; Archawin Rojanawiwat; Natchaya Khidsang; Nuttida Thongpramul; Pakorn Piromtong; Pilailuk Okada; Ratana Tacharoenmuang; Siripaporn Phuygun; Sittiporn Parmmen; Sunthareeya Waicharoen; Thanutsapa Thanadachakul; Warawan Wongboot; sirikanda wimol                                                                                                                                                                                                        |                                                                                                                                                                                                                                                                                                                                                                                                                                                                                                                                                                                                                                                                                                                                                                                      |
| EPI_ISL_3827304                                                                                                                                                                                                                                                                                                                                                                                                                                                                                                                                                                                                                                                                                                                                                                                                                                                                                                                                                                                                                                                                                                                                                                                                                                                                                                                                                                                                                                                                                                                                                                                                                                                                                                                                                                                                                                                                                                                                                                                                                                                                                                                                                                                                                                                                                                                                                                                                                                                                                                                                                                                                                                                                                                                                                                                                                                            | Phrae Hospital                                                                                    | Division of Genomic Medicine and Innovation support,Department of Medical Sciences, Ministry of Public Health, Thailand | Archawin Rojanawiwat; Jirapha Pakdee; Natthakul Bunneang; Nuanjun Wichukchinda; Penpitcha Thawong; Pilailuk Akkapaiboon Okada; Pundharika Piboonsiri; Surakameth Mahasirimongkol; Waritta Sawaengdee                                                                                                                                                                                                                                                       |                                                                                                                                                                                                                                                                                                                                                                                                                                                                                                                                                                                                                                                                                                                                                                                      |
| EPI_ISL_455585, EPI_ISL_455608                                                                                                                                                                                                                                                                                                                                                                                                                                                                                                                                                                                                                                                                                                                                                                                                                                                                                                                                                                                                                                                                                                                                                                                                                                                                                                                                                                                                                                                                                                                                                                                                                                                                                                                                                                                                                                                                                                                                                                                                                                                                                                                                                                                                                                                                                                                                                                                                                                                                                                                                                                                                                                                                                                                                                                                                                             | Phramongkutklao Hospital                                                                          | National Institute of Health, Department of medical Sciences, Ministry of Public Health, Thailand                       | Chittaganpitch; Malinee; Okada; Parmmen; Phuygun; Pilailuk; Siripaporn; Sittiporn; Sunthareeya; Thanadachakul; Thanutsapa; Waicharoen; Warawan; Wongboot                                                                                                                                                                                                                                                                                                   |                                                                                                                                                                                                                                                                                                                                                                                                                                                                                                                                                                                                                                                                                                                                                                                      |
| EPI_ISL_3827171                                                                                                                                                                                                                                                                                                                                                                                                                                                                                                                                                                                                                                                                                                                                                                                                                                                                                                                                                                                                                                                                                                                                                                                                                                                                                                                                                                                                                                                                                                                                                                                                                                                                                                                                                                                                                                                                                                                                                                                                                                                                                                                                                                                                                                                                                                                                                                                                                                                                                                                                                                                                                                                                                                                                                                                                                                            | Phu Kradueng Hospital                                                                             | Division of Genomic Medicine and Innovation support,Department of Medical Sciences, Ministry of Public Health, Thailand | Archawin Rojanawiwat; Jirapha Pakdee; Natthakul Bunneang; Nuanjun Wichukchinda; Penpitcha Thawong; Pilailuk Akkapaiboon Okada; Pundharika Piboonsiri; Surakameth Mahasirimongkol; Waritta Sawaengdee                                                                                                                                                                                                                                                       |                                                                                                                                                                                                                                                                                                                                                                                                                                                                                                                                                                                                                                                                                                                                                                                      |
| EPI_ISL_2433288, EPI_ISL_2433557                                                                                                                                                                                                                                                                                                                                                                                                                                                                                                                                                                                                                                                                                                                                                                                                                                                                                                                                                                                                                                                                                                                                                                                                                                                                                                                                                                                                                                                                                                                                                                                                                                                                                                                                                                                                                                                                                                                                                                                                                                                                                                                                                                                                                                                                                                                                                                                                                                                                                                                                                                                                                                                                                                                                                                                                                           | Phuket Provisional Hospital                                                                       | Division of Genomic Medicine and Innovation support,Department of Medical Sciences, Ministry of Public Health, Thailand | Archawin Rojanawiwat; Jirapha Pakdee; Natthakul Bunneang; Nuanjun Wichukchinda; Penpitcha Thawong; Pilailuk Akkapaiboon Okada; Pundharika Piboonsiri; Surakameth Mahasirimongkol; Waritta Sawaengdee                                                                                                                                                                                                                                                       |                                                                                                                                                                                                                                                                                                                                                                                                                                                                                                                                                                                                                                                                                                                                                                                      |

|                                                                                                                                                                                                                                                                                                                                                                                                                                                                                                                                                                                                                                                                                                                                                                                                                                                                                                                                                                       |                                                  |                                                                                                                         |                                                                                                                                                                                                                                                                                                                         |
|-----------------------------------------------------------------------------------------------------------------------------------------------------------------------------------------------------------------------------------------------------------------------------------------------------------------------------------------------------------------------------------------------------------------------------------------------------------------------------------------------------------------------------------------------------------------------------------------------------------------------------------------------------------------------------------------------------------------------------------------------------------------------------------------------------------------------------------------------------------------------------------------------------------------------------------------------------------------------|--------------------------------------------------|-------------------------------------------------------------------------------------------------------------------------|-------------------------------------------------------------------------------------------------------------------------------------------------------------------------------------------------------------------------------------------------------------------------------------------------------------------------|
| EPI_ISL_3407004                                                                                                                                                                                                                                                                                                                                                                                                                                                                                                                                                                                                                                                                                                                                                                                                                                                                                                                                                       | Phythai3 Hospital                                | National Institute of Health, Department of Medical Sciences, Ministry of Public Health, Thailand                       | ; Natchaya Khiahsang; Nuttida Thongpramul; Pakorn Piromtong; Pilailuk Okada; Ratana Tacharoenmuang; Siripaporn Phuygun; Sittiporn Pammen; Sunthareeya Waicharoen; Thanutsapa Thanadachakul; Warawan Wongboot; sirikanda wimol                                                                                           |
| EPI_ISL_3827187,<br>EPI_ISL_3827193,<br>EPI_ISL_3827197,<br>EPI_ISL_3827198,<br>EPI_ISL_3827429                                                                                                                                                                                                                                                                                                                                                                                                                                                                                                                                                                                                                                                                                                                                                                                                                                                                       | Phythai Hospital                                 | Division of Genomic Medicine and Innovation support,Department of Medical Sciences, Ministry of Public Health, Thailand | Archawin Rojanawiwat; Jirapha Pakdee; Natthakul Bunneang; Nuanjun Wichukchinda; Penpitcha Thawong; Pilailuk Akkapaiboon Okada; Pundharika Piboonsiri; Surakameth Mahasirimongkol; Waritta Sawaengdee                                                                                                                    |
| EPI_ISL_1173247, EPI_ISL_1495988, EPI_ISL_1495989, EPI_ISL_1495990, EPI_ISL_1495991, EPI_ISL_1497598, EPI_ISL_3665952, EPI_ISL_3665953, EPI_ISL_3665954, EPI_ISL_3665962, EPI_ISL_3665963                                                                                                                                                                                                                                                                                                                                                                                                                                                                                                                                                                                                                                                                                                                                                                             | Piyavate Hospital                                | National Institute of Health, Department of Medical Sciences, Ministry of Public Health, Thailand                       | ; Hathaikan Tanchai; Natchaya Khiahsang; Natchaya Khiahsang; Nuttida Thongpramul; Pakorn Piromtong; Pilailuk Okada; Ratana Tacharoenmuang; Siripaporn Phuygun; Sittiporn Pammen; Sunthareeya Waicharoen; Sunthareeya Waicharoen.; Thanutsapa Thanadachakul; Thanutsapa Thanadachakul; Warawan Wongboot; sirikanda wimol |
| EPI_ISL_3827377,<br>EPI_ISL_3827378,<br>EPI_ISL_3827380,<br>EPI_ISL_3827453                                                                                                                                                                                                                                                                                                                                                                                                                                                                                                                                                                                                                                                                                                                                                                                                                                                                                           | Pla pak Hospital                                 | Division of Genomic Medicine and Innovation support,Department of Medical Sciences, Ministry of Public Health, Thailand | Archawin Rojanawiwat; Jirapha Pakdee; Natthakul Bunneang; Nuanjun Wichukchinda; Penpitcha Thawong; Pilailuk Akkapaiboon Okada; Pundharika Piboonsiri; Surakameth Mahasirimongkol; Waritta Sawaengdee                                                                                                                    |
| EPI_ISL_3892044, EPI_ISL_3892046, EPI_ISL_3892048, EPI_ISL_3892049, EPI_ISL_3892051, EPI_ISL_3892052, EPI_ISL_3892055, EPI_ISL_3892057, EPI_ISL_3892058, EPI_ISL_3892061, EPI_ISL_3892062, EPI_ISL_3892065, EPI_ISL_3892067, EPI_ISL_3892069, EPI_ISL_3892075, EPI_ISL_3892079, EPI_ISL_3892088, EPI_ISL_3892089, EPI_ISL_3892092, EPI_ISL_3892094, EPI_ISL_3892095, EPI_ISL_3892097, EPI_ISL_3892098, EPI_ISL_3892100, EPI_ISL_3892107, EPI_ISL_3892109, EPI_ISL_3892111, EPI_ISL_3892113, EPI_ISL_3892115, EPI_ISL_3892119, EPI_ISL_3892124, EPI_ISL_3892130, EPI_ISL_3892135, EPI_ISL_3892138, EPI_ISL_3892140, EPI_ISL_3892141, EPI_ISL_3892144, EPI_ISL_3892146, EPI_ISL_3892148, EPI_ISL_3892150, EPI_ISL_3892153, EPI_ISL_3892154, EPI_ISL_3892155, EPI_ISL_3892157, EPI_ISL_3892158, EPI_ISL_3892160, EPI_ISL_3892162, EPI_ISL_3892165, EPI_ISL_3892167, EPI_ISL_3892168, EPI_ISL_3892171, EPI_ISL_3892173, EPI_ISL_3892176, EPI_ISL_3892178, EPI_ISL_3892180 | Port Health and Quarantine, Suvarnabhumi Airport | Thai Red Cross Emerging Infectious Diseases Clinical Center and Faculty of Medicine, Chulalongkorn University           | Anutsara Jitsatja; Jiratchaya Nuanpirom; Nattakarn Thippamom; Opass Putcharoen; Rawinan Soma; Rome Buathong; Sasiprapa Ninwattana; Sininat Petchtarat; Sirirak Thanasakulprasert; Sopon Iamsirithaworn; Supaporn Wacharaplusadee                                                                                        |
| EPI_ISL_430841, EPI_ISL_434698, EPI_ISL_434699, EPI_ISL_434702, EPI_ISL_434703, EPI_ISL_434704, EPI_ISL_434705, EPI_ISL_434706, EPI_ISL_455606, EPI_ISL_455607                                                                                                                                                                                                                                                                                                                                                                                                                                                                                                                                                                                                                                                                                                                                                                                                        | Param 9 Hospital                                 | National Institute of Health, Department of medical Sciences, Ministry of Public Health, Thailand                       | Chittaganpith; Malinee; Okada; Pammen; Phuygun; Pilailuk; Siripaporn; Sittiporn; Sunthareeya; Thanadachakul; Thanutsapa; Waicharoen; Warawan; Wongboot                                                                                                                                                                  |
| EPI_ISL_2351054, EPI_ISL_2351055, EPI_ISL_2351056, EPI_ISL_2351057, EPI_ISL_2351058, EPI_ISL_2351059, EPI_ISL_2351060, EPI_ISL_4235383, EPI_ISL_4235391, EPI_ISL_4235398, EPI_ISL_4235413                                                                                                                                                                                                                                                                                                                                                                                                                                                                                                                                                                                                                                                                                                                                                                             | Public Health Center 23 Siphraya                 | Division of Genomic Medicine and Innovation support,Department of Medical Sciences, Ministry of Public Health, Thailand | Archawin Rojanawiwat; Jirapha Pakdee; Natthakul Bunneang; Nuanjun Wichukchinda; Penpitcha Thawong; Pilailuk Akkapaiboon Okada; Pundharika Piboonsiri; Surakameth Mahasirimongkol; Waritta Sawaengdee                                                                                                                    |
| EPI_ISL_4235375,<br>EPI_ISL_4235399,<br>EPI_ISL_4235407,<br>EPI_ISL_4235430,<br>EPI_ISL_4235436                                                                                                                                                                                                                                                                                                                                                                                                                                                                                                                                                                                                                                                                                                                                                                                                                                                                       | Public Health Center 28 Krung Thon Buri,         | Division of Genomic Medicine and Innovation support,Department of Medical Sciences, Ministry of Public Health, Thailand | Archawin Rojanawiwat; Jirapha Pakdee; Natthakul Bunneang; Nuanjun Wichukchinda; Penpitcha Thawong; Pilailuk Akkapaiboon Okada; Pundharika Piboonsiri; Surakameth Mahasirimongkol; Waritta Sawaengdee                                                                                                                    |
| EPI_ISL_4235431,<br>EPI_ISL_4235437                                                                                                                                                                                                                                                                                                                                                                                                                                                                                                                                                                                                                                                                                                                                                                                                                                                                                                                                   | Public Health Center 29                          | Division of Genomic Medicine and Innovation support,Department of Medical Sciences, Ministry of Public Health, Thailand | Archawin Rojanawiwat; Jirapha Pakdee; Natthakul Bunneang; Nuanjun Wichukchinda; Penpitcha Thawong; Pilailuk Akkapaiboon Okada; Pundharika Piboonsiri; Surakameth Mahasirimongkol; Waritta Sawaengdee                                                                                                                    |
| EPI_ISL_4235363,<br>EPI_ISL_4235370,<br>EPI_ISL_4235378,<br>EPI_ISL_4235386                                                                                                                                                                                                                                                                                                                                                                                                                                                                                                                                                                                                                                                                                                                                                                                                                                                                                           | Public Health Center 31                          | Division of Genomic Medicine and Innovation support,Department of Medical Sciences, Ministry of Public Health, Thailand | Archawin Rojanawiwat; Jirapha Pakdee; Natthakul Bunneang; Nuanjun Wichukchinda; Penpitcha Thawong; Pilailuk Akkapaiboon Okada; Pundharika Piboonsiri; Surakameth Mahasirimongkol; Waritta Sawaengdee                                                                                                                    |
| EPI_ISL_3826508, EPI_ISL_3826509, EPI_ISL_3826510, EPI_ISL_3826511, EPI_ISL_3826512, EPI_ISL_3826513, EPI_ISL_3826514, EPI_ISL_3826515, EPI_ISL_3826766                                                                                                                                                                                                                                                                                                                                                                                                                                                                                                                                                                                                                                                                                                                                                                                                               | Public Health Center 32 Maris Tintamusik         | Division of Genomic Medicine and Innovation support,Department of Medical Sciences, Ministry of Public Health, Thailand | Archawin Rojanawiwat; Jirapha Pakdee; Natthakul Bunneang; Nuanjun Wichukchinda; Penpitcha Thawong; Pilailuk Akkapaiboon Okada; Pundharika Piboonsiri; Surakameth Mahasirimongkol; Waritta Sawaengdee                                                                                                                    |
| EPI_ISL_4235357                                                                                                                                                                                                                                                                                                                                                                                                                                                                                                                                                                                                                                                                                                                                                                                                                                                                                                                                                       | Public Health Center 4 Dindang                   | Division of Genomic Medicine and Innovation support,Department of Medical Sciences, Ministry of Public Health, Thailand | Archawin Rojanawiwat; Jirapha Pakdee; Natthakul Bunneang; Nuanjun Wichukchinda; Penpitcha Thawong; Pilailuk Akkapaiboon Okada; Pundharika Piboonsiri; Surakameth Mahasirimongkol; Waritta Sawaengdee                                                                                                                    |
| EPI_ISL_4235408,<br>EPI_ISL_4235424,<br>EPI_ISL_4235438                                                                                                                                                                                                                                                                                                                                                                                                                                                                                                                                                                                                                                                                                                                                                                                                                                                                                                               | Public Health Center 44                          | Division of Genomic Medicine and Innovation support,Department of Medical Sciences, Ministry of Public Health, Thailand | Archawin Rojanawiwat; Jirapha Pakdee; Natthakul Bunneang; Nuanjun Wichukchinda; Penpitcha Thawong; Pilailuk Akkapaiboon Okada; Pundharika Piboonsiri; Surakameth Mahasirimongkol; Waritta Sawaengdee                                                                                                                    |
| EPI_ISL_4235396,<br>EPI_ISL_4235404,<br>EPI_ISL_4235412,<br>EPI_ISL_4235417                                                                                                                                                                                                                                                                                                                                                                                                                                                                                                                                                                                                                                                                                                                                                                                                                                                                                           | Public Health Center 46                          | Division of Genomic Medicine and Innovation support,Department of Medical Sciences, Ministry of Public Health, Thailand | Archawin Rojanawiwat; Jirapha Pakdee; Natthakul Bunneang; Nuanjun Wichukchinda; Penpitcha Thawong; Pilailuk Akkapaiboon Okada; Pundharika Piboonsiri; Surakameth Mahasirimongkol; Waritta Sawaengdee                                                                                                                    |
| EPI_ISL_4235362,<br>EPI_ISL_4235422,<br>EPI_ISL_4235443                                                                                                                                                                                                                                                                                                                                                                                                                                                                                                                                                                                                                                                                                                                                                                                                                                                                                                               | Public Health Center 48                          | Division of Genomic Medicine and Innovation support,Department of Medical Sciences, Ministry of Public Health, Thailand | Archawin Rojanawiwat; Jirapha Pakdee; Natthakul Bunneang; Nuanjun Wichukchinda; Penpitcha Thawong; Pilailuk Akkapaiboon Okada; Pundharika Piboonsiri; Surakameth Mahasirimongkol; Waritta Sawaengdee                                                                                                                    |
| EPI_ISL_2351103, EPI_ISL_2351104, EPI_ISL_2351105, EPI_ISL_2351106, EPI_ISL_2351107, EPI_ISL_2351108, EPI_ISL_2351109, EPI_ISL_2351110, EPI_ISL_2351111, EPI_ISL_2351112, EPI_ISL_2351113, EPI_ISL_2351114, EPI_ISL_2351115, EPI_ISL_2351116, EPI_ISL_2351117, EPI_ISL_2351118, EPI_ISL_2351119, EPI_ISL_2351120, EPI_ISL_2351121, EPI_ISL_2351122, EPI_ISL_2351123, EPI_ISL_2351124, EPI_ISL_2351125, EPI_ISL_2351126, EPI_ISL_2351127, EPI_ISL_2351128, EPI_ISL_2351129, EPI_ISL_2351130, EPI_ISL_2351131, EPI_ISL_2351132, EPI_ISL_2351133, EPI_ISL_2351134, EPI_ISL_2351135, EPI_ISL_2351136, EPI_ISL_2351137, EPI_ISL_2351138, EPI_ISL_2351139, EPI_ISL_2351140, EPI_ISL_2351141, EPI_ISL_2351142, EPI_ISL_2351143, EPI_ISL_2351144, EPI_ISL_2351145, EPI_ISL_2351146, EPI_ISL_2351147, EPI_ISL_2351148, EPI_ISL_2351149, EPI_ISL_2351150, EPI_ISL_2351151, EPI_ISL_3826778                                                                                      | Public Health Center 52 Samsennok                | Division of Genomic Medicine and Innovation support,Department of Medical Sciences, Ministry of Public Health, Thailand | Archawin Rojanawiwat; Jirapha Pakdee; Natthakul Bunneang; Nuanjun Wichukchinda; Penpitcha Thawong; Pilailuk Akkapaiboon Okada; Pundharika Piboonsiri; Surakameth Mahasirimongkol; Waritta Sawaengdee                                                                                                                    |
| EPI_ISL_4235381,<br>EPI_ISL_4235387,<br>EPI_ISL_4235389,<br>EPI_ISL_4235393,<br>EPI_ISL_4235411,<br>EPI_ISL_4235415                                                                                                                                                                                                                                                                                                                                                                                                                                                                                                                                                                                                                                                                                                                                                                                                                                                   | Public Health Center 53                          | Division of Genomic Medicine and Innovation support,Department of Medical Sciences, Ministry of Public Health, Thailand | Archawin Rojanawiwat; Jirapha Pakdee; Natthakul Bunneang; Nuanjun Wichukchinda; Penpitcha Thawong; Pilailuk Akkapaiboon Okada; Pundharika Piboonsiri; Surakameth Mahasirimongkol; Waritta Sawaengdee                                                                                                                    |
| EPI_ISL_4235418,<br>EPI_ISL_4235445                                                                                                                                                                                                                                                                                                                                                                                                                                                                                                                                                                                                                                                                                                                                                                                                                                                                                                                                   | Public Health Center 61                          | Division of Genomic Medicine and Innovation support,Department of Medical Sciences, Ministry of Public Health, Thailand | Archawin Rojanawiwat; Jirapha Pakdee; Natthakul Bunneang; Nuanjun Wichukchinda; Penpitcha Thawong; Pilailuk Akkapaiboon Okada; Pundharika Piboonsiri; Surakameth Mahasirimongkol; Waritta Sawaengdee                                                                                                                    |
| EPI_ISL_4235419,<br>EPI_ISL_4235420                                                                                                                                                                                                                                                                                                                                                                                                                                                                                                                                                                                                                                                                                                                                                                                                                                                                                                                                   | Public Health Center 63                          | Division of Genomic Medicine and Innovation support,Department of Medical Sciences, Ministry of Public Health, Thailand | Archawin Rojanawiwat; Jirapha Pakdee; Natthakul Bunneang; Nuanjun Wichukchinda; Penpitcha Thawong; Pilailuk Akkapaiboon Okada; Pundharika Piboonsiri; Surakameth Mahasirimongkol; Waritta Sawaengdee                                                                                                                    |
| EPI_ISL_4647324                                                                                                                                                                                                                                                                                                                                                                                                                                                                                                                                                                                                                                                                                                                                                                                                                                                                                                                                                       | Public Health Center 64 khong Sam Wa             | Division of Genomic Medicine and Innovation support,Department of Medical Sciences, Ministry of Public Health, Thailand | Archawin Rojanawiwat; Jirapha Pakdee; Natthakul Bunneang; Nuanjun Wichukchinda; Penpitcha Thawong; Pilailuk Akkapaiboon Okada; Pundharika Piboonsiri; Surakameth Mahasirimongkol; Waritta Sawaengdee                                                                                                                    |
| EPI_ISL_2351080                                                                                                                                                                                                                                                                                                                                                                                                                                                                                                                                                                                                                                                                                                                                                                                                                                                                                                                                                       | Public Health Center 65                          | Division of Genomic Medicine and Innovation support,Department of Medical Sciences, Ministry of Public Health, Thailand | Archawin Rojanawiwat; Jirapha Pakdee; Natthakul Bunneang; Nuanjun Wichukchinda; Penpitcha Thawong; Pilailuk Akkapaiboon Okada; Pundharika Piboonsiri; Surakameth Mahasirimongkol; Waritta Sawaengdee                                                                                                                    |
| EPI_ISL_4235364                                                                                                                                                                                                                                                                                                                                                                                                                                                                                                                                                                                                                                                                                                                                                                                                                                                                                                                                                       | Public Health Center 67 Taweewattana             | Division of Genomic Medicine and Innovation support,Department of Medical Sciences, Ministry of Public Health, Thailand | Archawin Rojanawiwat; Jirapha Pakdee; Natthakul Bunneang; Nuanjun Wichukchinda; Penpitcha Thawong; Pilailuk Akkapaiboon Okada; Pundharika Piboonsiri; Surakameth Mahasirimongkol; Waritta Sawaengdee                                                                                                                    |
| EPI_ISL_4235390,<br>EPI_ISL_4235392,<br>EPI_ISL_4235406                                                                                                                                                                                                                                                                                                                                                                                                                                                                                                                                                                                                                                                                                                                                                                                                                                                                                                               | Public Health Center 69                          | Division of Genomic Medicine and Innovation support,Department of Medical Sciences, Ministry of Public Health, Thailand | Archawin Rojanawiwat; Jirapha Pakdee; Natthakul Bunneang; Nuanjun Wichukchinda; Penpitcha Thawong; Pilailuk Akkapaiboon Okada; Pundharika Piboonsiri; Surakameth Mahasirimongkol; Waritta Sawaengdee                                                                                                                    |
| EPI_ISL_4647349                                                                                                                                                                                                                                                                                                                                                                                                                                                                                                                                                                                                                                                                                                                                                                                                                                                                                                                                                       | Public Health Center 7 Boonmee Bururatchransan   | Division of Genomic Medicine and Innovation support,Department of Medical Sciences, Ministry of Public Health, Thailand | Archawin Rojanawiwat; Jirapha Pakdee; Natthakul Bunneang; Nuanjun Wichukchinda; Penpitcha Thawong; Pilailuk Akkapaiboon Okada; Pundharika Piboonsiri; Surakameth Mahasirimongkol; Waritta Sawaengdee                                                                                                                    |
| EPI_ISL_2351200,<br>EPI_ISL_2351201,<br>EPI_ISL_2351202                                                                                                                                                                                                                                                                                                                                                                                                                                                                                                                                                                                                                                                                                                                                                                                                                                                                                                               | Public Health Centre 29                          | Division of Genomic Medicine and Innovation support,Department of Medical Sciences, Ministry of Public Health, Thailand | Archawin Rojanawiwat; Jirapha Pakdee; Natthakul Bunneang; Nuanjun Wichukchinda; Penpitcha Thawong; Pilailuk Akkapaiboon Okada; Pundharika Piboonsiri; Surakameth Mahasirimongkol; Waritta Sawaengdee                                                                                                                    |
| EPI_ISL_2351203,<br>EPI_ISL_2351204                                                                                                                                                                                                                                                                                                                                                                                                                                                                                                                                                                                                                                                                                                                                                                                                                                                                                                                                   | Public Health Centre 33                          | Division of Genomic Medicine and Innovation support,Department of Medical Sciences, Ministry of Public Health, Thailand | Archawin Rojanawiwat; Jirapha Pakdee; Natthakul Bunneang; Nuanjun Wichukchinda; Penpitcha Thawong; Pilailuk Akkapaiboon Okada; Pundharika Piboonsiri; Surakameth Mahasirimongkol; Waritta Sawaengdee                                                                                                                    |
| EPI_ISL_2351199, EPI_ISL_2351205, EPI_ISL_2351206, EPI_ISL_2351207, EPI_ISL_2351208, EPI_ISL_2351209, EPI_ISL_2351210, EPI_ISL_2351211, EPI_ISL_2351212, EPI_ISL_2351213, EPI_ISL_2351214, EPI_ISL_2351215                                                                                                                                                                                                                                                                                                                                                                                                                                                                                                                                                                                                                                                                                                                                                            | Public Health Centre 36                          | Division of Genomic Medicine and Innovation support,Department of Medical Sciences, Ministry of Public Health, Thailand | Archawin Rojanawiwat; Jirapha Pakdee; Natthakul Bunneang; Nuanjun Wichukchinda; Penpitcha Thawong; Pilailuk Akkapaiboon Okada; Pundharika Piboonsiri; Surakameth Mahasirimongkol; Waritta Sawaengdee                                                                                                                    |
| EPI_ISL_2351052, EPI_ISL_2351053, EPI_ISL_2351152, EPI_ISL_2351153, EPI_ISL_2351196, EPI_ISL_2351197, EPI_ISL_2351198                                                                                                                                                                                                                                                                                                                                                                                                                                                                                                                                                                                                                                                                                                                                                                                                                                                 | Public Health Centre 40                          | Division of Genomic Medicine and Innovation support,Department of Medical Sciences, Ministry of Public Health, Thailand | Archawin Rojanawiwat; Jirapha Pakdee; Natthakul Bunneang; Nuanjun Wichukchinda; Penpitcha Thawong; Pilailuk Akkapaiboon Okada; Pundharika Piboonsiri; Surakameth Mahasirimongkol; Waritta Sawaengdee                                                                                                                    |
| EPI_ISL_3826506,<br>EPI_ISL_3826507                                                                                                                                                                                                                                                                                                                                                                                                                                                                                                                                                                                                                                                                                                                                                                                                                                                                                                                                   | Public Health Centre 58 Lom-Phimsen Fak Udom     | Division of Genomic Medicine and Innovation support,Department of Medical Sciences, Ministry of Public Health, Thailand | Archawin Rojanawiwat; Jirapha Pakdee; Natthakul Bunneang; Nuanjun Wichukchinda; Penpitcha Thawong; Pilailuk Akkapaiboon Okada; Pundharika Piboonsiri; Surakameth Mahasirimongkol; Waritta Sawaengdee                                                                                                                    |
| EPI_ISL_2351081, EPI_ISL_2351082, EPI_ISL_2351083, EPI_ISL_2351084, EPI_ISL_2351085, EPI_ISL_2351086, EPI_ISL_2351087, EPI_ISL_2351088, EPI_ISL_2351089, EPI_ISL_2351090, EPI_ISL_2351091, EPI_ISL_2351092, EPI_ISL_2351093, EPI_ISL_2351094, EPI_ISL_2351095, EPI_ISL_2351096, EPI_ISL_2351097, EPI_ISL_2351098, EPI_ISL_2351099, EPI_ISL_2351100, EPI_ISL_2351101, EPI_ISL_2351102                                                                                                                                                                                                                                                                                                                                                                                                                                                                                                                                                                                  | Public Health Centre 6                           | Division of Genomic Medicine and Innovation support,Department of Medical Sciences, Ministry of Public Health, Thailand | Archawin Rojanawiwat; Jirapha Pakdee; Natthakul Bunneang; Nuanjun Wichukchinda; Penpitcha Thawong; Pilailuk Akkapaiboon Okada; Pundharika Piboonsiri; Surakameth Mahasirimongkol; Waritta Sawaengdee                                                                                                                    |

[illegible]

|                                                                                                                                                                                                                                                                                                                                                                                                                                                                                                                                                                                                                                                                                                                                                                                                                                                                                                                                                                                                                                                                                                                                                                                                                                                                                                                                                                                                                                                                                                                                                                                                                                                                                                                                                                                                                                                                                                                             |                                                     |                                                                                                                         |                                                                                                                                                                                                                                                                                                                         |
|-----------------------------------------------------------------------------------------------------------------------------------------------------------------------------------------------------------------------------------------------------------------------------------------------------------------------------------------------------------------------------------------------------------------------------------------------------------------------------------------------------------------------------------------------------------------------------------------------------------------------------------------------------------------------------------------------------------------------------------------------------------------------------------------------------------------------------------------------------------------------------------------------------------------------------------------------------------------------------------------------------------------------------------------------------------------------------------------------------------------------------------------------------------------------------------------------------------------------------------------------------------------------------------------------------------------------------------------------------------------------------------------------------------------------------------------------------------------------------------------------------------------------------------------------------------------------------------------------------------------------------------------------------------------------------------------------------------------------------------------------------------------------------------------------------------------------------------------------------------------------------------------------------------------------------|-----------------------------------------------------|-------------------------------------------------------------------------------------------------------------------------|-------------------------------------------------------------------------------------------------------------------------------------------------------------------------------------------------------------------------------------------------------------------------------------------------------------------------|
| Joonlasak; Khajohn Joonalak; Kingkan Rakmanee; Krittikorn Kumpornsin; Namfon Kotanan; Poramate Jarana; Stefan Fernandez; Thanat Chookajorn; Theerarat Kochakarn; Treewat Watthanachockchai; Wasun Chantrattita; Wuditchai Manasatienki                                                                                                                                                                                                                                                                                                                                                                                                                                                                                                                                                                                                                                                                                                                                                                                                                                                                                                                                                                                                                                                                                                                                                                                                                                                                                                                                                                                                                                                                                                                                                                                                                                                                                      |                                                     |                                                                                                                         |                                                                                                                                                                                                                                                                                                                         |
| EPI_ISL_515465, EPI_ISL_515467, EPI_ISL_515469, EPI_ISL_1497606                                                                                                                                                                                                                                                                                                                                                                                                                                                                                                                                                                                                                                                                                                                                                                                                                                                                                                                                                                                                                                                                                                                                                                                                                                                                                                                                                                                                                                                                                                                                                                                                                                                                                                                                                                                                                                                             | Ramathibodi Hospital                                | National Institute of Health, Department of medical Sciences, Ministry of Public Health, Thailand                       | Chittaganpitch; Malinee; Okada; Parmnen; Phuygun; Pilailuk; Siripaporn; Sittiporn; Sunthareeya; Thanadachakul; Thanutsapa; Waicharen; Warawan; Wongboot                                                                                                                                                                 |
| EPI_ISL_434700, EPI_ISL_455604, EPI_ISL_515292                                                                                                                                                                                                                                                                                                                                                                                                                                                                                                                                                                                                                                                                                                                                                                                                                                                                                                                                                                                                                                                                                                                                                                                                                                                                                                                                                                                                                                                                                                                                                                                                                                                                                                                                                                                                                                                                              | Ramkhamhaeng Hospital                               | National Institute of Health, Department of Medical Sciences, Ministry of Public Health, Thailand                       | Hathaikan Tanchai; Natchaya Khadsang; Nuttida Thongpramul; Pakorn Piromtong; Pilailuk Okada; Ratana Tacharoenmuang; Siripaporn Phuygun; Sittiporn Parmnen; Sunthareeya Waicharen.; Thanutsapa Thanadachakul                                                                                                             |
| EPI_ISL_2348492, EPI_ISL_2348493, EPI_ISL_2348494, EPI_ISL_2350930, EPI_ISL_2350931, EPI_ISL_2350932, EPI_ISL_2350933, EPI_ISL_2350934, EPI_ISL_2350935, EPI_ISL_2350936                                                                                                                                                                                                                                                                                                                                                                                                                                                                                                                                                                                                                                                                                                                                                                                                                                                                                                                                                                                                                                                                                                                                                                                                                                                                                                                                                                                                                                                                                                                                                                                                                                                                                                                                                    | Ramkhamhaeng Hospital                               | National Institute of Health, Department of medical Sciences, Ministry of Public Health, Thailand                       | Chittaganpitch; Malinee; Okada; Parmnen; Phuygun; Pilailuk; Siripaporn; Sittiporn; Sunthareeya; Thanadachakul; Thanutsapa; Waicharen; Warawan; Wongboot                                                                                                                                                                 |
| see above                                                                                                                                                                                                                                                                                                                                                                                                                                                                                                                                                                                                                                                                                                                                                                                                                                                                                                                                                                                                                                                                                                                                                                                                                                                                                                                                                                                                                                                                                                                                                                                                                                                                                                                                                                                                                                                                                                                   | Ratchaburi Hospital                                 | Division of Genomic Medicine and Innovation support,Department of Medical Sciences, Ministry of Public Health, Thailand | Archawin Rojanawiwat; Jirapha Pakdee; Natthakul Bunneang; Nuanjun Wichukchinda; Penpitcha Thawong; Pilailuk Akkapaiboon Okada; Pundharika Piboonsiri; Surakameth Mahasirimongkol; Waritta Sawaengdee                                                                                                                    |
| EPI_ISL_2433326, EPI_ISL_2433337                                                                                                                                                                                                                                                                                                                                                                                                                                                                                                                                                                                                                                                                                                                                                                                                                                                                                                                                                                                                                                                                                                                                                                                                                                                                                                                                                                                                                                                                                                                                                                                                                                                                                                                                                                                                                                                                                            | Rattaphum Hospital                                  | Division of Genomic Medicine and Innovation support,Department of Medical Sciences, Ministry of Public Health, Thailand | Archawin Rojanawiwat; Jirapha Pakdee; Natthakul Bunneang; Nuanjun Wichukchinda; Penpitcha Thawong; Pilailuk Akkapaiboon Okada; Pundharika Piboonsiri; Surakameth Mahasirimongkol; Waritta Sawaengdee                                                                                                                    |
| EPI_ISL_2433292, EPI_ISL_2433312, EPI_ISL_2433314, EPI_ISL_2433442, EPI_ISL_2433443, EPI_ISL_2433444, EPI_ISL_2433445, EPI_ISL_2433446, EPI_ISL_2433618                                                                                                                                                                                                                                                                                                                                                                                                                                                                                                                                                                                                                                                                                                                                                                                                                                                                                                                                                                                                                                                                                                                                                                                                                                                                                                                                                                                                                                                                                                                                                                                                                                                                                                                                                                     | see above                                           | Division of Genomic Medicine and Innovation support,Department of Medical Sciences, Ministry of Public Health, Thailand | Archawin Rojanawiwat; Jirapha Pakdee; Natthakul Bunneang; Nuanjun Wichukchinda; Penpitcha Thawong; Pilailuk Akkapaiboon Okada; Pundharika Piboonsiri; Surakameth Mahasirimongkol; Waritta Sawaengdee                                                                                                                    |
| EPI_ISL_3038912                                                                                                                                                                                                                                                                                                                                                                                                                                                                                                                                                                                                                                                                                                                                                                                                                                                                                                                                                                                                                                                                                                                                                                                                                                                                                                                                                                                                                                                                                                                                                                                                                                                                                                                                                                                                                                                                                                             | Regional Medical Science Center 2 Phitsanulok       | National Institute of Health, Department of Medical Sciences, Ministry of Public Health, Thailand                       | ; Natchaya Khadsang; Nuttida Thongpramul; Pakorn Piromtong; Pilailuk Okada; Ratana Tacharoenmuang; Siripaporn Phuygun; Sittiporn Parmnen; Sunthareeya Waicharen; Thanutsapa Thanadachakul; Warawan Wongboot; sirikanda wimol                                                                                            |
| EPI_ISL_4647568, EPI_ISL_4647573, EPI_ISL_4647582                                                                                                                                                                                                                                                                                                                                                                                                                                                                                                                                                                                                                                                                                                                                                                                                                                                                                                                                                                                                                                                                                                                                                                                                                                                                                                                                                                                                                                                                                                                                                                                                                                                                                                                                                                                                                                                                           | Regional Medical Sciences Center 1 Chiang Mai       | Division of Genomic Medicine and Innovation support,Department of Medical Sciences, Ministry of Public Health, Thailand | Archawin Rojanawiwat; Jirapha Pakdee; Natthakul Bunneang; Nuanjun Wichukchinda; Penpitcha Thawong; Pilailuk Akkapaiboon Okada; Pundharika Piboonsiri; Surakameth Mahasirimongkol; Waritta Sawaengdee                                                                                                                    |
| EPI_ISL_3402015, EPI_ISL_3402016, EPI_ISL_3407823, EPI_ISL_3407824, EPI_ISL_3407825, EPI_ISL_3407827, EPI_ISL_3407854, EPI_ISL_3534190, EPI_ISL_3534191, EPI_ISL_3534192, EPI_ISL_3534193, EPI_ISL_4117756, EPI_ISL_4117767, EPI_ISL_4634614, EPI_ISL_4635444, EPI_ISL_4635445, EPI_ISL_4635446, EPI_ISL_4636445, EPI_ISL_4636452                                                                                                                                                                                                                                                                                                                                                                                                                                                                                                                                                                                                                                                                                                                                                                                                                                                                                                                                                                                                                                                                                                                                                                                                                                                                                                                                                                                                                                                                                                                                                                                           | see above                                           | National Institute of Health, Department of Medical Sciences, Ministry of Public Health, Thailand                       | ; Archawin Rojanawiwat; Natchaya Khadsang; Nuttida Thongpramul; Pakorn Piromtong; Pilailuk Okada; Ratana Tacharoenmuang; Siripaporn Phuygun; Sittiporn Parmnen; Sunthareeya Waicharen; Thanutsapa Thanadachakul; Warawan Wongboot; sirikanda wimol                                                                      |
| EPI_ISL_768524, EPI_ISL_768528, EPI_ISL_768529, EPI_ISL_768609, EPI_ISL_768614, EPI_ISL_1251232, EPI_ISL_1251233, EPI_ISL_1251234, EPI_ISL_1251235, EPI_ISL_1251236, EPI_ISL_3407815, EPI_ISL_3471407, EPI_ISL_3471408, EPI_ISL_3471417, EPI_ISL_3534200, EPI_ISL_3590625, EPI_ISL_3590626, EPI_ISL_3797059, EPI_ISL_3797060, EPI_ISL_3797061, EPI_ISL_4117771, EPI_ISL_4117775, EPI_ISL_4636420, EPI_ISL_4636449, EPI_ISL_4636450                                                                                                                                                                                                                                                                                                                                                                                                                                                                                                                                                                                                                                                                                                                                                                                                                                                                                                                                                                                                                                                                                                                                                                                                                                                                                                                                                                                                                                                                                          | Regional Medical Sciences Center 1 Chiang Mai       | National Institute of Health, Department of Medical Sciences, Ministry of Public Health, Thailand                       | ; Archawin Rojanawiwat; Natchaya Khadsang; Nuttida Thongpramul; Pakorn Piromtong; Pilailuk Okada; Ratana Tacharoenmuang; Siripaporn Phuygun; Sittiporn Parmnen; Sunthareeya Waicharen; Thanutsapa Thanadachakul; Warawan Wongboot; sirikanda wimol                                                                      |
| see above                                                                                                                                                                                                                                                                                                                                                                                                                                                                                                                                                                                                                                                                                                                                                                                                                                                                                                                                                                                                                                                                                                                                                                                                                                                                                                                                                                                                                                                                                                                                                                                                                                                                                                                                                                                                                                                                                                                   | Regional Medical Sciences Center 1/1 Chiang Rai     | National Institute of Health, Department of Medical Sciences, Ministry of Public Health, Thailand                       | ; Archawin Rojanawiwat; Hathaikan Tanchai; Natchaya Khadsang; Nuttida Thongpramul; Pakorn Piromtong; Pilailuk Okada; Ratana Tacharoenmuang; Siripaporn Phuygun; Sittiporn Parmnen; Sunthareeya Waicharen; Sunthareeya Waicharen.; Thanutsapa Thanadachakul; Thanutsapa Thanadachakul; Warawan Wongboot; sirikanda wimol |
| EPI_ISL_2433285, EPI_ISL_2433300, EPI_ISL_2433306, EPI_ISL_2433516, EPI_ISL_2433517, EPI_ISL_2433518, EPI_ISL_2433519, EPI_ISL_2433520, EPI_ISL_2433521, EPI_ISL_2433522, EPI_ISL_2433523, EPI_ISL_2433524, EPI_ISL_2433525, EPI_ISL_2433526, EPI_ISL_2433527, EPI_ISL_2433528, EPI_ISL_2433529, EPI_ISL_2433530, EPI_ISL_2433531, EPI_ISL_2433532, EPI_ISL_2433554, EPI_ISL_4647586, EPI_ISL_4647591, EPI_ISL_4647596, EPI_ISL_4647601, EPI_ISL_4647608, EPI_ISL_4647617, EPI_ISL_4647666, EPI_ISL_4647674, EPI_ISL_4647680, EPI_ISL_4647686, EPI_ISL_4647687, EPI_ISL_4647692, EPI_ISL_4647693, EPI_ISL_4647699                                                                                                                                                                                                                                                                                                                                                                                                                                                                                                                                                                                                                                                                                                                                                                                                                                                                                                                                                                                                                                                                                                                                                                                                                                                                                                           | see above                                           | Division of Genomic Medicine and Innovation support,Department of Medical Sciences, Ministry of Public Health, Thailand | Archawin Rojanawiwat; Jirapha Pakdee; Natthakul Bunneang; Nuanjun Wichukchinda; Penpitcha Thawong; Pilailuk Akkapaiboon Okada; Pundharika Piboonsiri; Surakameth Mahasirimongkol; Waritta Sawaengdee                                                                                                                    |
| EPI_ISL_2877032, EPI_ISL_2877033                                                                                                                                                                                                                                                                                                                                                                                                                                                                                                                                                                                                                                                                                                                                                                                                                                                                                                                                                                                                                                                                                                                                                                                                                                                                                                                                                                                                                                                                                                                                                                                                                                                                                                                                                                                                                                                                                            | Regional Medical Sciences Center 1/1 Chiangrai      | National Institute of Health, Department of Medical Sciences, Ministry of Public Health, Thailand                       | ; Natchaya Khadsang; Nuttida Thongpramul; Pakorn Piromtong; Pilailuk Okada; Ratana Tacharoenmuang; Siripaporn Phuygun; Sittiporn Parmnen; Sunthareeya Waicharen; Thanutsapa Thanadachakul; Warawan Wongboot; sirikanda wimol                                                                                            |
| EPI_ISL_3038911, EPI_ISL_3047862                                                                                                                                                                                                                                                                                                                                                                                                                                                                                                                                                                                                                                                                                                                                                                                                                                                                                                                                                                                                                                                                                                                                                                                                                                                                                                                                                                                                                                                                                                                                                                                                                                                                                                                                                                                                                                                                                            | Regional Medical Sciences Center 10 Ubonratchathani | National Institute of Health, Department of Medical Sciences, Ministry of Public Health, Thailand                       | ; Natchaya Khadsang; Natchaya Khadsang; Nuttida Thongpramul; Pakorn Piromtong; Pilailuk Okada; Ratana Tacharoenmuang; Siripaporn Phuygun; Sittiporn Parmnen; Sunthareeya Waicharen; Thanutsapa Thanadachakul; Warawan Wongboot; sirikanda wimol                                                                         |
| EPI_ISL_3407828, EPI_ISL_3407829, EPI_ISL_3407837, EPI_ISL_3407839, EPI_ISL_3407840, EPI_ISL_3407849, EPI_ISL_3407858, EPI_ISL_3407859, EPI_ISL_3419391, EPI_ISL_3419392, EPI_ISL_3471400, EPI_ISL_3534199, EPI_ISL_4050576, EPI_ISL_4636439, EPI_ISL_4646106                                                                                                                                                                                                                                                                                                                                                                                                                                                                                                                                                                                                                                                                                                                                                                                                                                                                                                                                                                                                                                                                                                                                                                                                                                                                                                                                                                                                                                                                                                                                                                                                                                                               | see above                                           | Regional Medical Sciences Center 11 Surat Thani                                                                         | ; Archawin Rojanawiwat; Natchaya Khadsang; Nuttida Thongpramul; Pakorn Piromtong; Pilailuk Okada; Ratana Tacharoenmuang; Siripaporn Phuygun; Sittiporn Parmnen; Sunthareeya Waicharen; Thanutsapa Thanadachakul; Warawan Wongboot; sirikanda wimol                                                                      |
| EPI_ISL_4647621                                                                                                                                                                                                                                                                                                                                                                                                                                                                                                                                                                                                                                                                                                                                                                                                                                                                                                                                                                                                                                                                                                                                                                                                                                                                                                                                                                                                                                                                                                                                                                                                                                                                                                                                                                                                                                                                                                             | Regional Medical Sciences Center 11/1 Phuket        | Division of Genomic Medicine and Innovation support,Department of Medical Sciences, Ministry of Public Health, Thailand | Archawin Rojanawiwat; Jirapha Pakdee; Natthakul Bunneang; Nuanjun Wichukchinda; Penpitcha Thawong; Pilailuk Akkapaiboon Okada; Pundharika Piboonsiri; Surakameth Mahasirimongkol; Waritta Sawaengdee                                                                                                                    |
| EPI_ISL_3402017, EPI_ISL_3403344, EPI_ISL_3407821, EPI_ISL_3407852, EPI_ISL_3407861, EPI_ISL_3419394, EPI_ISL_3471402, EPI_ISL_3471403, EPI_ISL_3471411, EPI_ISL_3471412, EPI_ISL_3471413, EPI_ISL_3531670, EPI_ISL_3531674, EPI_ISL_4050582, EPI_ISL_4050583, EPI_ISL_4106143, EPI_ISL_4117778, EPI_ISL_4117783, EPI_ISL_4170070, EPI_ISL_4635423, EPI_ISL_4635424, EPI_ISL_4635425, EPI_ISL_4636426, EPI_ISL_4635427, EPI_ISL_4636446, EPI_ISL_4636454                                                                                                                                                                                                                                                                                                                                                                                                                                                                                                                                                                                                                                                                                                                                                                                                                                                                                                                                                                                                                                                                                                                                                                                                                                                                                                                                                                                                                                                                    | see above                                           | National Institute of Health, Department of Medical Sciences, Ministry of Public Health, Thailand                       | ; Archawin Rojanawiwat; Natchaya Khadsang; Nuttida Thongpramul; Pakorn Piromtong; Pilailuk Okada; Ratana Tacharoenmuang; Siripaporn Phuygun; Sittiporn Parmnen; Sunthareeya Waicharen; Thanutsapa Thanadachakul; Warawan Wongboot; sirikanda wimol                                                                      |
| EPI_ISL_699464, EPI_ISL_708723, EPI_ISL_708735                                                                                                                                                                                                                                                                                                                                                                                                                                                                                                                                                                                                                                                                                                                                                                                                                                                                                                                                                                                                                                                                                                                                                                                                                                                                                                                                                                                                                                                                                                                                                                                                                                                                                                                                                                                                                                                                              | Regional Medical Sciences Center 11/1 phuket        | National Institute of Health, Department of Medical Sciences, Ministry of Public Health, Thailand                       | Malinee Chittaganpitch; Pilailuk Okada; Siripaporn Phuygun; Sittiporn Parmnen; Sunthareeya Waicharen; Thanutsapa Thanadachakul; Warawan Wongboot                                                                                                                                                                        |
| EPI_ISL_3826474, EPI_ISL_3826475, EPI_ISL_3826481, EPI_ISL_3826764, EPI_ISL_3826769, EPI_ISL_3826772, EPI_ISL_3826774, EPI_ISL_3826777, EPI_ISL_3826781                                                                                                                                                                                                                                                                                                                                                                                                                                                                                                                                                                                                                                                                                                                                                                                                                                                                                                                                                                                                                                                                                                                                                                                                                                                                                                                                                                                                                                                                                                                                                                                                                                                                                                                                                                     | see above                                           | Regional Medical Sciences Center 12 Songkhla                                                                            | Archawin Rojanawiwat; Jirapha Pakdee; Natthakul Bunneang; Nuanjun Wichukchinda; Penpitcha Thawong; Pilailuk Akkapaiboon Okada; Pundharika Piboonsiri; Surakameth Mahasirimongkol; Waritta Sawaengdee                                                                                                                    |
| EPI_ISL_2840595, EPI_ISL_2840596, EPI_ISL_2840597, EPI_ISL_3342067, EPI_ISL_3342068, EPI_ISL_3403351, EPI_ISL_3403352, EPI_ISL_3403353, EPI_ISL_3403354, EPI_ISL_3403355, EPI_ISL_3407844, EPI_ISL_3407848, EPI_ISL_3407853, EPI_ISL_3407860, EPI_ISL_3797054, EPI_ISL_3797055, EPI_ISL_3797056, EPI_ISL_3797057, EPI_ISL_3797058, EPI_ISL_3801323, EPI_ISL_4050574, EPI_ISL_4050579, EPI_ISL_4050581, EPI_ISL_4050584, EPI_ISL_4106140, EPI_ISL_4106146, EPI_ISL_4117786, EPI_ISL_4117787, EPI_ISL_4117794, EPI_ISL_4200230, EPI_ISL_4200236, EPI_ISL_4200238, EPI_ISL_4200240, EPI_ISL_4200241, EPI_ISL_4200243, EPI_ISL_4200247, EPI_ISL_4200251, EPI_ISL_4254660, EPI_ISL_4254662, EPI_ISL_4254663, EPI_ISL_4254664, EPI_ISL_4254667, EPI_ISL_4254668, EPI_ISL_4254669, EPI_ISL_4254670, EPI_ISL_4254671, EPI_ISL_4254672, EPI_ISL_4262471, EPI_ISL_4262472, EPI_ISL_4262473, EPI_ISL_4348476, EPI_ISL_4348478, EPI_ISL_4348479, EPI_ISL_4634615, EPI_ISL_4635432, EPI_ISL_4635433, EPI_ISL_4635434, EPI_ISL_4635435, EPI_ISL_4635436, EPI_ISL_4636421, EPI_ISL_4636422, EPI_ISL_4636435, EPI_ISL_4636436, EPI_ISL_4636437, EPI_ISL_4636438, EPI_ISL_4636457, EPI_ISL_4646126                                                                                                                                                                                                                                                                                                                                                                                                                                                                                                                                                                                                                                                                                                                                           | see above                                           | National Institute of Health, Department of Medical Sciences, Ministry of Public Health, Thailand                       | ; Archawin Rojanawiwat; Natchaya Khadsang; Natchaya Khadsang; Nuttida Thongpramul; Pakorn Piromtong; Pilailuk Okada; Ratana Tacharoenmuang; Siripaporn Phuygun; Sittiporn Parmnen; Sunthareeya Waicharen; Thanutsapa Thanadachakul; Warawan Wongboot; sirikanda wimol                                                   |
| EPI_ISL_3403350, EPI_ISL_3407816, EPI_ISL_3407845, EPI_ISL_3407847, EPI_ISL_3407850, EPI_ISL_3471414, EPI_ISL_3471415, EPI_ISL_3471416, EPI_ISL_3531679, EPI_ISL_3534185, EPI_ISL_3534186, EPI_ISL_3534194, EPI_ISL_3534195, EPI_ISL_3534196, EPI_ISL_3534197, EPI_ISL_3534198, EPI_ISL_3590629, EPI_ISL_4050575, EPI_ISL_4200232, EPI_ISL_4200234, EPI_ISL_4254661, EPI_ISL_4634616, EPI_ISL_4635429, EPI_ISL_4635430, EPI_ISL_4635431, EPI_ISL_4636424, EPI_ISL_4636425                                                                                                                                                                                                                                                                                                                                                                                                                                                                                                                                                                                                                                                                                                                                                                                                                                                                                                                                                                                                                                                                                                                                                                                                                                                                                                                                                                                                                                                   | see above                                           | Regional Medical Sciences Center 12/1 Trang                                                                             | ; Archawin Rojanawiwat; Natchaya Khadsang; Nuttida Thongpramul; Pakorn Piromtong; Pilailuk Okada; Ratana Tacharoenmuang; Siripaporn Phuygun; Sittiporn Parmnen; Sunthareeya Waicharen; Thanutsapa Thanadachakul; Warawan Wongboot; sirikanda wimol                                                                      |
| EPI_ISL_3826572, EPI_ISL_3826573, EPI_ISL_3826574, EPI_ISL_3826575, EPI_ISL_3826576, EPI_ISL_3826577, EPI_ISL_3826578, EPI_ISL_3826579, EPI_ISL_3826580, EPI_ISL_3826581, EPI_ISL_3826582, EPI_ISL_3826583, EPI_ISL_3826584, EPI_ISL_3826585, EPI_ISL_3826586, EPI_ISL_3826587, EPI_ISL_3826588, EPI_ISL_3826589, EPI_ISL_3826590, EPI_ISL_3826591, EPI_ISL_3826592, EPI_ISL_3826593, EPI_ISL_3826594, EPI_ISL_3826595, EPI_ISL_3826596, EPI_ISL_3826597, EPI_ISL_3826598, EPI_ISL_3826599, EPI_ISL_3826600, EPI_ISL_3826601, EPI_ISL_3826602, EPI_ISL_3826603, EPI_ISL_3826604, EPI_ISL_3826605, EPI_ISL_3826791, EPI_ISL_3826800, EPI_ISL_3826801                                                                                                                                                                                                                                                                                                                                                                                                                                                                                                                                                                                                                                                                                                                                                                                                                                                                                                                                                                                                                                                                                                                                                                                                                                                                         | see above                                           | Regional Medical Sciences Center 2 Phitsanulok                                                                          | Archawin Rojanawiwat; Jirapha Pakdee; Natthakul Bunneang; Nuanjun Wichukchinda; Penpitcha Thawong; Pilailuk Akkapaiboon Okada; Pundharika Piboonsiri; Surakameth Mahasirimongkol; Waritta Sawaengdee                                                                                                                    |
| EPI_ISL_3406995, EPI_ISL_3407818, EPI_ISL_3407832, EPI_ISL_3407835, EPI_ISL_3407836, EPI_ISL_3407871, EPI_ISL_3407874, EPI_ISL_4170071, EPI_ISL_4348477, EPI_ISL_4636453                                                                                                                                                                                                                                                                                                                                                                                                                                                                                                                                                                                                                                                                                                                                                                                                                                                                                                                                                                                                                                                                                                                                                                                                                                                                                                                                                                                                                                                                                                                                                                                                                                                                                                                                                    | see above                                           | Regional Medical Sciences Center 2 Phitsanulok                                                                          | ; Archawin Rojanawiwat; Natchaya Khadsang; Nuttida Thongpramul; Pakorn Piromtong; Pilailuk Okada; Ratana Tacharoenmuang; Siripaporn Phuygun; Sittiporn Parmnen; Sunthareeya Waicharen; Thanutsapa Thanadachakul; Warawan Wongboot; sirikanda wimol                                                                      |
| EPI_ISL_3407819, EPI_ISL_3407822, EPI_ISL_3407831, EPI_ISL_3407863, EPI_ISL_3407865, EPI_ISL_3471405, EPI_ISL_4050578, EPI_ISL_4262467, EPI_ISL_4262468, EPI_ISL_4262474, EPI_ISL_4262475, EPI_ISL_4348469, EPI_ISL_4348471, EPI_ISL_4348472, EPI_ISL_4348473, EPI_ISL_4348474, EPI_ISL_4348475, EPI_ISL_4634612, EPI_ISL_4636428, EPI_ISL_4636429, EPI_ISL_4636442, EPI_ISL_4636443, EPI_ISL_4636448, EPI_ISL_4636458                                                                                                                                                                                                                                                                                                                                                                                                                                                                                                                                                                                                                                                                                                                                                                                                                                                                                                                                                                                                                                                                                                                                                                                                                                                                                                                                                                                                                                                                                                      | see above                                           | Regional Medical Sciences Center 3 Nakhon Sawan                                                                         | ; Archawin Rojanawiwat; Natchaya Khadsang; Nuttida Thongpramul; Pakorn Piromtong; Pilailuk Okada; Ratana Tacharoenmuang; Siripaporn Phuygun; Sittiporn Parmnen; Sunthareeya Waicharen; Thanutsapa Thanadachakul; Warawan Wongboot; sirikanda wimol                                                                      |
| EPI_ISL_3342063, EPI_ISL_3342062                                                                                                                                                                                                                                                                                                                                                                                                                                                                                                                                                                                                                                                                                                                                                                                                                                                                                                                                                                                                                                                                                                                                                                                                                                                                                                                                                                                                                                                                                                                                                                                                                                                                                                                                                                                                                                                                                            | Regional Medical Sciences Center 3 Nakhonsawan      | National Institute of Health, Department of Medical Sciences, Ministry of Public Health, Thailand                       | ; Natchaya Khadsang; Nuttida Thongpramul; Pakorn Piromtong; Pilailuk Okada; Ratana Tacharoenmuang; Siripaporn Phuygun; Sittiporn Parmnen; Sunthareeya Waicharen; Thanutsapa Thanadachakul; Warawan Wongboot; sirikanda wimol                                                                                            |
| EPI_ISL_3471406, EPI_ISL_4262469                                                                                                                                                                                                                                                                                                                                                                                                                                                                                                                                                                                                                                                                                                                                                                                                                                                                                                                                                                                                                                                                                                                                                                                                                                                                                                                                                                                                                                                                                                                                                                                                                                                                                                                                                                                                                                                                                            | Regional Medical Sciences Center 4 Saraburi         | National Institute of Health, Department of Medical Sciences, Ministry of Public Health, Thailand                       | ; Archawin Rojanawiwat; Natchaya Khadsang; Nuttida Thongpramul; Pakorn Piromtong; Pilailuk Okada; Ratana Tacharoenmuang; Siripaporn Phuygun; Sittiporn Parmnen; Sunthareeya Waicharen; Thanutsapa Thanadachakul; Warawan Wongboot; sirikanda wimol                                                                      |
| EPI_ISL_768530, EPI_ISL_768531, EPI_ISL_768532, EPI_ISL_768533, EPI_ISL_768534, EPI_ISL_768535, EPI_ISL_768536, EPI_ISL_768537, EPI_ISL_768538, EPI_ISL_768539, EPI_ISL_768540, EPI_ISL_768541, EPI_ISL_768542, EPI_ISL_768543, EPI_ISL_768544, EPI_ISL_768615, EPI_ISL_768617, EPI_ISL_3342061, EPI_ISL_3406999, EPI_ISL_3407000, EPI_ISL_3407833, EPI_ISL_3407872, EPI_ISL_3419318                                                                                                                                                                                                                                                                                                                                                                                                                                                                                                                                                                                                                                                                                                                                                                                                                                                                                                                                                                                                                                                                                                                                                                                                                                                                                                                                                                                                                                                                                                                                        | see above                                           | Regional Medical Sciences Center 5 Samut Songkhram                                                                      | ; Natchaya Khadsang; Nuttida Thongpramul; Pakorn Piromtong; Pilailuk Okada; Ratana Tacharoenmuang; Siripaporn Phuygun; Sittiporn Parmnen; Sunthareeya Waicharen; Thanutsapa Thanadachakul; Warawan Wongboot; sirikanda wimol                                                                                            |
| EPI_ISL_2348496, EPI_ISL_2348497, EPI_ISL_2350921, EPI_ISL_2350922, EPI_ISL_2350923, EPI_ISL_2350924, EPI_ISL_2350925, EPI_ISL_2350926, EPI_ISL_2350927, EPI_ISL_2350928, EPI_ISL_2350929, EPI_ISL_3826473, EPI_ISL_3826477, EPI_ISL_3826478, EPI_ISL_3826479, EPI_ISL_3826480, EPI_ISL_3826482, EPI_ISL_3826524, EPI_ISL_3826528, EPI_ISL_3826529, EPI_ISL_3826531, EPI_ISL_3826532, EPI_ISL_3826533, EPI_ISL_3826534, EPI_ISL_3826536, EPI_ISL_3826538, EPI_ISL_3826539, EPI_ISL_3826540, EPI_ISL_3826541, EPI_ISL_3826542, EPI_ISL_3826543, EPI_ISL_3826544, EPI_ISL_3826545, EPI_ISL_3826546, EPI_ISL_3826547, EPI_ISL_3826548, EPI_ISL_3826549, EPI_ISL_3826550, EPI_ISL_3826551, EPI_ISL_3826552, EPI_ISL_3826554, EPI_ISL_3826555, EPI_ISL_3826556, EPI_ISL_3826557, EPI_ISL_3826558, EPI_ISL_3826559, EPI_ISL_3826560, EPI_ISL_3826561, EPI_ISL_3826562, EPI_ISL_3826563, EPI_ISL_3826564, EPI_ISL_3826565, EPI_ISL_3826566, EPI_ISL_3826567, EPI_ISL_3826568, EPI_ISL_3826569, EPI_ISL_3826570, EPI_ISL_3826571, EPI_ISL_3826574, EPI_ISL_3826575, EPI_ISL_3826576, EPI_ISL_3826577, EPI_ISL_3826578, EPI_ISL_3826579, EPI_ISL_3826580, EPI_ISL_3826581, EPI_ISL_3826582, EPI_ISL_3826583, EPI_ISL_3826584, EPI_ISL_3826585, EPI_ISL_3826586, EPI_ISL_3826587, EPI_ISL_3826588, EPI_ISL_3826589, EPI_ISL_3826590, EPI_ISL_3826591, EPI_ISL_3826592, EPI_ISL_3826593, EPI_ISL_3826594, EPI_ISL_3826595, EPI_ISL_3826596, EPI_ISL_3826597, EPI_ISL_3826598, EPI_ISL_3826599, EPI_ISL_3826600, EPI_ISL_3826601, EPI_ISL_3826602, EPI_ISL_3826603, EPI_ISL_3826604, EPI_ISL_3826605, EPI_ISL_3826791, EPI_ISL_3826792, EPI_ISL_3826793, EPI_ISL_3826794, EPI_ISL_3826795, EPI_ISL_3826796, EPI_ISL_3826797, EPI_ISL_3826798, EPI_ISL_3826799, EPI_ISL_4557925, EPI_ISL_4647622, EPI_ISL_4647626, EPI_ISL_4647635, EPI_ISL_4647640, EPI_ISL_4647641, EPI_ISL_4647647, EPI_ISL_4647650, EPI_ISL_4647655, EPI_ISL_4647658 | see above                                           | Regional Medical Sciences Center 6 Chonburi                                                                             | Archawin Rojanawiwat; Jirapha Pakdee; Natthakul Bunneang; Nuanjun Wichukchinda; Penpitcha Thawong; Pilailuk Akkapaiboon Okada; Pundharika Piboonsiri; Surakameth Mahasirimongkol; Waritta Sawaengdee                                                                                                                    |
| EPI_ISL_3402018, EPI_ISL_3406994, EPI_ISL_3407830, EPI_ISL_3407834, EPI_ISL_3407841, EPI_ISL_3419316, EPI_ISL_3419395, EPI_ISL_3419397, EPI_ISL_3471409, EPI_ISL_3471410, EPI_ISL_3531666, EPI_ISL_3534187, EPI_ISL_3534188, EPI_ISL_3534189, EPI_ISL_3534190, EPI_ISL_3590617, EPI_ISL_3590618, EPI_ISL_3590619, EPI_ISL_3590620, EPI_ISL_3590621, EPI_ISL_3590622, EPI_ISL_3631655, EPI_ISL_3631656, EPI_ISL_3631657, EPI_ISL_3631658, EPI_ISL_3636271, EPI_ISL_3636272, EPI_ISL_3797062, EPI_ISL_4050577, EPI_ISL_4050580, EPI_ISL_4106141, EPI_ISL_4106142, EPI_ISL_4106145, EPI_ISL_4106147, EPI_ISL_4117797, EPI_ISL_4117802, EPI_ISL_4117805, EPI_ISL_4170072, EPI_ISL_4170073, EPI_ISL_4170074, EPI_ISL_4201551, EPI_ISL_4254659, EPI_ISL_4254665, EPI_ISL_4634613, EPI_ISL_4634617, EPI_ISL_4635438, EPI_ISL_4635439, EPI_ISL_4635440, EPI_ISL_4635441, EPI_ISL_4635442, EPI_ISL_4636418, EPI_ISL_4636419, EPI_ISL_4636426, EPI_ISL_4636427, EPI_ISL_4636440, EPI_ISL_4636448, EPI_ISL_4636451, EPI_ISL_4636455, EPI_ISL_4636456, EPI_ISL_4646118                                                                                                                                                                                                                                                                                                                                                                                                                                                                                                                                                                                                                                                                                                                                                                                                                                                                  |                                                     |                                                                                                                         |                                                                                                                                                                                                                                                                                                                         |

|                                                                                                                                                                                                                                                                                                                                                                                                                                                                                                                                                                                                                                                                                                                                                                                                                                                                                                                                                                                                                          |                                                      |                                                                                                                         |                                                                                                                                                                                                                                                                                                                                                                                                                                                         |
|--------------------------------------------------------------------------------------------------------------------------------------------------------------------------------------------------------------------------------------------------------------------------------------------------------------------------------------------------------------------------------------------------------------------------------------------------------------------------------------------------------------------------------------------------------------------------------------------------------------------------------------------------------------------------------------------------------------------------------------------------------------------------------------------------------------------------------------------------------------------------------------------------------------------------------------------------------------------------------------------------------------------------|------------------------------------------------------|-------------------------------------------------------------------------------------------------------------------------|---------------------------------------------------------------------------------------------------------------------------------------------------------------------------------------------------------------------------------------------------------------------------------------------------------------------------------------------------------------------------------------------------------------------------------------------------------|
| see above                                                                                                                                                                                                                                                                                                                                                                                                                                                                                                                                                                                                                                                                                                                                                                                                                                                                                                                                                                                                                | Regional Medical Sciences Center 6 Chonburi          | National Institute of Health, Department of Medical Sciences, Ministry of Public Health, Thailand                       | ; Archawin Rojanawiwat; Natchaya Khiahsang; Nuttida Thongpramul; Pakorn Piromtong; Pilailuk Okada; Ratana Tacharoenmuang; Siripaporn Phuygun; Sittiporn Parmnen; Sunthareeya Waicharoen; Thanutsapa Thanadachakul; Warawan Wongboot; sirikanda wimol                                                                                                                                                                                                    |
| EPI_ISL_3406996, EPI_ISL_3406996, EPI_ISL_3407002, EPI_ISL_3407003, EPI_ISL_3407842, EPI_ISL_3407846, EPI_ISL_3407866, EPI_ISL_3407869, EPI_ISL_3407873, EPI_ISL_3665955, EPI_ISL_4348470, EPI_ISL_4636430, EPI_ISL_4636431, EPI_ISL_4636432, EPI_ISL_4636433, EPI_ISL_4636434, EPI_ISL_4646091, EPI_ISL_4646092, EPI_ISL_4646099, EPI_ISL_4646105, EPI_ISL_4646127                                                                                                                                                                                                                                                                                                                                                                                                                                                                                                                                                                                                                                                      | Regional Medical Sciences Center 7 Khon Kaen         | National Institute of Health, Department of Medical Sciences, Ministry of Public Health, Thailand                       | ; Archawin Rojanawiwat; Natchaya Khiahsang; Nuttida Thongpramul; Pakorn Piromtong; Pilailuk Okada; Ratana Tacharoenmuang; Siripaporn Phuygun; Sittiporn Parmnen; Sunthareeya Waicharoen; Thanutsapa Thanadachakul; Warawan Wongboot; sirikanda wimol                                                                                                                                                                                                    |
| EPI_ISL_1251229, EPI_ISL_1251230, EPI_ISL_1251231                                                                                                                                                                                                                                                                                                                                                                                                                                                                                                                                                                                                                                                                                                                                                                                                                                                                                                                                                                        | Regional Medical Sciences Center 7 Khon Kean         | National Institute of Health, Department of Medical Sciences, Ministry of Public Health, Thailand                       | Hathaikan Tanchai; Natchaya Khiahsang; Nuttida Thongpramul; Pakorn Piromtong; Pilailuk Okada; Ratana Tacharoenmuang; Siripaporn Phuygun; Sittiporn Parmnen; Sunthareeya Waicharoen.; Thanutsapa Thanadachakul                                                                                                                                                                                                                                           |
| EPI_ISL_2877034, EPI_ISL_2877035, EPI_ISL_2877036, EPI_ISL_2877037, EPI_ISL_3038903, EPI_ISL_3038910, EPI_ISL_3342069, EPI_ISL_3402020, EPI_ISL_3402021, EPI_ISL_3402022, EPI_ISL_3407851, EPI_ISL_3407870, EPI_ISL_3419396, EPI_ISL_3590627, EPI_ISL_3590628, EPI_ISL_3801324, EPI_ISL_4636423                                                                                                                                                                                                                                                                                                                                                                                                                                                                                                                                                                                                                                                                                                                          | Regional Medical Sciences Center 8 Udonthani         | National Institute of Health, Department of Medical Sciences, Ministry of Public Health, Thailand                       | ; Archawin Rojanawiwat; Natchaya Khiahsang; Natchaya Khiahsang; Nuttida Thongpramul; Pakorn Piromtong; Pilailuk Okada; Ratana Tacharoenmuang; Siripaporn Phuygun; Sittiporn Parmnen; Sunthareeya Waicharoen; Thanutsapa Thanadachakul; Warawan Wongboot; sirikanda wimol                                                                                                                                                                                |
| EPI_ISL_3342066, EPI_ISL_3407857, EPI_ISL_3407864, EPI_ISL_3419317, EPI_ISL_3471404, EPI_ISL_3590623, EPI_ISL_3590624, EPI_ISL_3631659, EPI_ISL_4635428, EPI_ISL_4636447, EPI_ISL_4646112                                                                                                                                                                                                                                                                                                                                                                                                                                                                                                                                                                                                                                                                                                                                                                                                                                | Regional Medical Sciences Center 9 Nakhon Ratchasima | National Institute of Health, Department of Medical Sciences, Ministry of Public Health, Thailand                       | ; Archawin Rojanawiwat; Natchaya Khiahsang; Nuttida Thongpramul; Pakorn Piromtong; Pilailuk Okada; Ratana Tacharoenmuang; Siripaporn Phuygun; Sittiporn Parmnen; Sunthareeya Waicharoen; Thanutsapa Thanadachakul; Warawan Wongboot; sirikanda wimol                                                                                                                                                                                                    |
| EPI_ISL_3827175, EPI_ISL_3827266, EPI_ISL_3827267, EPI_ISL_3827268, EPI_ISL_3827269, EPI_ISL_3827270, EPI_ISL_3827271, EPI_ISL_3827272, EPI_ISL_3827273, EPI_ISL_3827274, EPI_ISL_3827275, EPI_ISL_3827276, EPI_ISL_3827277, EPI_ISL_3827278, EPI_ISL_3827279, EPI_ISL_3827280, EPI_ISL_3827281, EPI_ISL_3827282, EPI_ISL_3827283, EPI_ISL_3827284, EPI_ISL_3827285, EPI_ISL_3827286, EPI_ISL_3827287, EPI_ISL_3827288, EPI_ISL_3827290, EPI_ISL_3827291, EPI_ISL_3827292, EPI_ISL_3827293, EPI_ISL_3827294, EPI_ISL_3827295, EPI_ISL_3827296, EPI_ISL_3827297, EPI_ISL_3827298, EPI_ISL_3827392, EPI_ISL_3827393, EPI_ISL_3827394, EPI_ISL_3827395, EPI_ISL_3827396, EPI_ISL_3827457, EPI_ISL_3827478, EPI_ISL_3827481, EPI_ISL_3827482                                                                                                                                                                                                                                                                                 | Regional Medical Sciences Centre 12/1 Trang          | Division of Genomic Medicine and Innovation support,Department of Medical Sciences, Ministry of Public Health, Thailand | Archawin Rojanawiwat; Natchaya Khiahsang; Nuttida Thongpramul; Pakorn Piromtong; Pilailuk Okada; Ratana Tacharoenmuang; Siripaporn Phuygun; Sittiporn Parmnen; Sunthareeya Waicharoen; Thanutsapa Thanadachakul; Warawan Wongboot; sirikanda wimol                                                                                                                                                                                                      |
| EPI_ISL_708810, EPI_ISL_708811                                                                                                                                                                                                                                                                                                                                                                                                                                                                                                                                                                                                                                                                                                                                                                                                                                                                                                                                                                                           | Regional medical sciences center 2 Phitsanulok       | National Institute of Health, Department of Medical Sciences, Ministry of Public Health, Thailand                       | Malinee Chittaganpitch; Pakorn Piromtong; Pilailuk Okada; Siripaporn Phuygun; Sittiporn Parmnen; Sunthareeya Waicharoen; Thanutsapa Thanadachakul; Warawan Wongboot                                                                                                                                                                                                                                                                                     |
| EPI_ISL_735588, EPI_ISL_768521, EPI_ISL_768610, EPI_ISL_768611                                                                                                                                                                                                                                                                                                                                                                                                                                                                                                                                                                                                                                                                                                                                                                                                                                                                                                                                                           | Regional medical sciences center 6 Chonburi          | National Institute of Health, Department of Medical Sciences, Ministry of Public Health, Thailand                       | ; Malinee Chittaganpitch; Natchaya Khiahsang; Pakorn Piromtong; Pilailuk Okada; Ratana Tacharoenmuang; Siripaporn Phuygun; Sittiporn Parmnen; Sunthareeya Waicharoen; Thanutsapa Thanadachakul; Warawan Wongboot; sirikanda wimol                                                                                                                                                                                                                       |
| EPI_ISL_708737, EPI_ISL_708797, EPI_ISL_708800, EPI_ISL_708801, EPI_ISL_708802, EPI_ISL_708804, EPI_ISL_708806, EPI_ISL_708807, EPI_ISL_708808                                                                                                                                                                                                                                                                                                                                                                                                                                                                                                                                                                                                                                                                                                                                                                                                                                                                           | Regional medical sciences center 6 chonburi          | National Institute of Health, Department of Medical Sciences, Ministry of Public Health, Thailand                       | Malinee Chittaganpitch; Pakorn Piromtong; Pilailuk Okada; Siripaporn Phuygun; Sittiporn Parmnen; Sunthareeya Waicharoen; Thanutsapa Thanadachakul; Warawan Wongboot                                                                                                                                                                                                                                                                                     |
| EPI_ISL_3827357, EPI_ISL_3827358, EPI_ISL_3827359, EPI_ISL_3827363, EPI_ISL_3827455, EPI_ISL_3827479                                                                                                                                                                                                                                                                                                                                                                                                                                                                                                                                                                                                                                                                                                                                                                                                                                                                                                                     | Roi-Et Hospital                                      | Division of Genomic Medicine and Innovation support,Department of Medical Sciences, Ministry of Public Health, Thailand | Archawin Rojanawiwat; Jirapha Pakdee; Natthakul Bunneang; Nuanjun Wichukchinda; Penpitcha Thawong; Pilailuk Akkapaiboon Okada; Pundharika Piboonsiri; Surakameth Mahasirimongkol; Waritta Sawaengdee                                                                                                                                                                                                                                                    |
| EPI_ISL_1495995                                                                                                                                                                                                                                                                                                                                                                                                                                                                                                                                                                                                                                                                                                                                                                                                                                                                                                                                                                                                          | Sai Noi Hospital                                     | National Institute of Health, Department of Medical Sciences, Ministry of Public Health, Thailand                       | Hathaikan Tanchai; Natchaya Khiahsang; Nuttida Thongpramul; Pakorn Piromtong; Pilailuk Okada; Ratana Tacharoenmuang; Siripaporn Phuygun; Sittiporn Parmnen; Sunthareeya Waicharoen.; Thanutsapa Thanadachakul                                                                                                                                                                                                                                           |
| EPI_ISL_1497599, EPI_ISL_1497600, EPI_ISL_1497601, EPI_ISL_1497604, EPI_ISL_1497605, EPI_ISL_1497607, EPI_ISL_1497609                                                                                                                                                                                                                                                                                                                                                                                                                                                                                                                                                                                                                                                                                                                                                                                                                                                                                                    | Samutsakhon Provincial Public Health Office          | National Institute of Health, Department of Medical Sciences, Ministry of Public Health, Thailand                       | Hathaikan Tanchai; Natchaya Khiahsang; Nuttida Thongpramul; Pakorn Piromtong; Pilailuk Okada; Ratana Tacharoenmuang; Siripaporn Phuygun; Sittiporn Parmnen; Sunthareeya Waicharoen.; Thanutsapa Thanadachakul                                                                                                                                                                                                                                           |
| EPI_ISL_2802818, EPI_ISL_2802819, EPI_ISL_2802820, EPI_ISL_2802821, EPI_ISL_2802822, EPI_ISL_2802823, EPI_ISL_2802824, EPI_ISL_2802825, EPI_ISL_2802826, EPI_ISL_2802827, EPI_ISL_2802828, EPI_ISL_2802829, EPI_ISL_2802830, EPI_ISL_2928512, EPI_ISL_2928513, EPI_ISL_2928514, EPI_ISL_2928515, EPI_ISL_2928516, EPI_ISL_2928517, EPI_ISL_2928518, EPI_ISL_2928519, EPI_ISL_2928520, EPI_ISL_2928521, EPI_ISL_2928522, EPI_ISL_3716307, EPI_ISL_3716316, EPI_ISL_3716319, EPI_ISL_3716327, EPI_ISL_3716331, EPI_ISL_3716332, EPI_ISL_3716333, EPI_ISL_3716334, EPI_ISL_3716344, EPI_ISL_3716346, EPI_ISL_3791311, EPI_ISL_3791314, EPI_ISL_3791318, EPI_ISL_3791322, EPI_ISL_3791325, EPI_ISL_3791338, EPI_ISL_3791349, EPI_ISL_4279182, EPI_ISL_4279183, EPI_ISL_4279184                                                                                                                                                                                                                                               | Shoklo Malaria Research Unit                         | COVID-19 Network Investigations (CONI) Alliance                                                                         | Angkana Huang; Anthony R. Jones; Arporn Wangiwatsin; Bhakbhoon Panthan; Chonticha Klungtong; Duangkamon Loesbanluechai; Ekawat Pasomsub; Elizabeth Batty; Francois Nosten; Insee Sensor; Janjira Thaipadungpanit; Khajohn Joonlasak; Kingkan Rakmanee; Krittikorn Kumpornsin; Namfon Kotanan; Stefan Fernandez; Thanat Chookajorn; Theerarat Kochakarn; Treewat Watthanachockchai; Wanitda Watthanaworawit; Wasun Chantratrata; Wuditchai Manasatienkij |
| EPI_ISL_3827172                                                                                                                                                                                                                                                                                                                                                                                                                                                                                                                                                                                                                                                                                                                                                                                                                                                                                                                                                                                                          | Si Bun Rueang Hospital                               | Division of Genomic Medicine and Innovation support,Department of Medical Sciences, Ministry of Public Health, Thailand | Archawin Rojanawiwat; Jirapha Pakdee; Natthakul Bunneang; Nuanjun Wichukchinda; Penpitcha Thawong; Pilailuk Akkapaiboon Okada; Pundharika Piboonsiri; Surakameth Mahasirimongkol; Waritta Sawaengdee                                                                                                                                                                                                                                                    |
| EPI_ISL_768523                                                                                                                                                                                                                                                                                                                                                                                                                                                                                                                                                                                                                                                                                                                                                                                                                                                                                                                                                                                                           | Singburi Hospital                                    | National Institute of Health, Department of Medical Sciences, Ministry of Public Health, Thailand                       | ; Natchaya Khiahsang; Pakorn Piromtong; Pilailuk Okada; Ratana Tacharoenmuang; Siripaporn Phuygun; Sittiporn Parmnen; Sunthareeya Waicharoen; Thanutsapa Thanadachakul; Warawan Wongboot; sirikanda wimol                                                                                                                                                                                                                                               |
| EPI_ISL_4235100, EPI_ISL_4235102, EPI_ISL_4235118, EPI_ISL_4235120, EPI_ISL_4235128, EPI_ISL_4235129, EPI_ISL_4235136, EPI_ISL_4235137, EPI_ISL_4235143, EPI_ISL_4235144, EPI_ISL_4235150, EPI_ISL_4235151, EPI_ISL_4235158, EPI_ISL_4235159, EPI_ISL_4235166, EPI_ISL_4235167, EPI_ISL_4235174, EPI_ISL_4235175, EPI_ISL_4235181, EPI_ISL_4235182, EPI_ISL_4235188, EPI_ISL_4235194, EPI_ISL_4235202, EPI_ISL_4235206, EPI_ISL_4235214, EPI_ISL_4235228, EPI_ISL_4235243, EPI_ISL_4235251, EPI_ISL_4235258, EPI_ISL_4235266, EPI_ISL_4235274, EPI_ISL_4235280, EPI_ISL_4235290, EPI_ISL_4235291, EPI_ISL_4235295, EPI_ISL_4235296, EPI_ISL_4235301, EPI_ISL_4235302, EPI_ISL_4235306, EPI_ISL_4235307, EPI_ISL_4235308, EPI_ISL_4235312, EPI_ISL_4235313, EPI_ISL_4235314, EPI_ISL_4235319, EPI_ISL_4235320, EPI_ISL_4235326, EPI_ISL_4235328, EPI_ISL_4235332, EPI_ISL_4235333, EPI_ISL_4235338, EPI_ISL_4235339, EPI_ISL_4235343, EPI_ISL_4235344, EPI_ISL_4235349, EPI_ISL_4235350, EPI_ISL_4235354, EPI_ISL_4235355 | Sirindhorn Hospital                                  | Division of Genomic Medicine and Innovation support,Department of Medical Sciences, Ministry of Public Health, Thailand | Archawin Rojanawiwat; Jirapha Pakdee; Natthakul Bunneang; Nuanjun Wichukchinda; Penpitcha Thawong; Pilailuk Akkapaiboon Okada; Pundharika Piboonsiri; Surakameth Mahasirimongkol; Waritta Sawaengdee                                                                                                                                                                                                                                                    |
| EPI_ISL_3038904, EPI_ISL_3665956, EPI_ISL_3665957                                                                                                                                                                                                                                                                                                                                                                                                                                                                                                                                                                                                                                                                                                                                                                                                                                                                                                                                                                        | Siriraj Hospital                                     | National Institute of Health, Department of Medical Sciences, Ministry of Public Health, Thailand                       | ; Natchaya Khiahsang; Natchaya Khiahsang; Nuttida Thongpramul; Pakorn Piromtong; Pilailuk Okada; Ratana Tacharoenmuang; Siripaporn Phuygun; Sittiporn Parmnen; Sunthareeya Waicharoen; Thanutsapa Thanadachakul; Warawan Wongboot; sirikanda wimol                                                                                                                                                                                                      |
| EPI_ISL_515464                                                                                                                                                                                                                                                                                                                                                                                                                                                                                                                                                                                                                                                                                                                                                                                                                                                                                                                                                                                                           | Siriraj Hospital                                     | National Institute of Health, Department of medical Sciences, Ministry of Public Health, Thailand                       | Chittaganpitch; Malinee; Okada; Parmnen; Phuygun; Pilailuk; Siripaporn; Sittiporn; Sunthareeya; Thanadachakul; Thanutsapa; Waicharoen; Warawan; Wongboot                                                                                                                                                                                                                                                                                                |
| EPI_ISL_756375                                                                                                                                                                                                                                                                                                                                                                                                                                                                                                                                                                                                                                                                                                                                                                                                                                                                                                                                                                                                           | Siriraj Hospital, Mahidol University                 | National Institute of Health, Department of Medical Sciences, Ministry of Public Health, Thailand                       | Archiraya Pattama; Chutikarn Chaimayo; Natchaya Khiahsang; Navin Horthongkham; Niracha Athipanyasilp; Pakorn Piromtong; Pilailuk Okada; Ratana Tacharoenmuang; Ruengpung Sutthent; Sirikanda wimol; Siripaporn Phuygun; Sittiporn Parmnen; Sunthareeya Waicharoen; Thanutsapa Thanadachakul; Wannee Kantakamalakul.; Warawan Wongboot                                                                                                                   |
| EPI_ISL_447906, EPI_ISL_447907, EPI_ISL_447908, EPI_ISL_455586                                                                                                                                                                                                                                                                                                                                                                                                                                                                                                                                                                                                                                                                                                                                                                                                                                                                                                                                                           | Siriraj hospital                                     | National Institute of Health, Department of medical Sciences, Ministry of Public Health, Thailand                       | Chittaganpitch; Malinee; Navin Horthongkham; Okada; Parmnen; Phuygun; Pilailuk; Siripaporn; Sittiporn; Sunthareeya; Thanadachakul; Thanutsapa; Waicharoen; Warawan; Wongboot                                                                                                                                                                                                                                                                            |
| EPI_ISL_3827465                                                                                                                                                                                                                                                                                                                                                                                                                                                                                                                                                                                                                                                                                                                                                                                                                                                                                                                                                                                                          | Sirivej Hospital Chanthaburi                         | Division of Genomic Medicine and Innovation support,Department of Medical Sciences, Ministry of Public Health, Thailand | Archawin Rojanawiwat; Jirapha Pakdee; Natthakul Bunneang; Nuanjun Wichukchinda; Penpitcha Thawong; Pilailuk Akkapaiboon Okada; Pundharika Piboonsiri; Surakameth Mahasirimongkol; Waritta Sawaengdee                                                                                                                                                                                                                                                    |
| EPI_ISL_3827375, EPI_ISL_3827376, EPI_ISL_3827379, EPI_ISL_3827385                                                                                                                                                                                                                                                                                                                                                                                                                                                                                                                                                                                                                                                                                                                                                                                                                                                                                                                                                       | Song Dao Hospital                                    | Division of Genomic Medicine and Innovation support,Department of Medical Sciences, Ministry of Public Health, Thailand | Archawin Rojanawiwat; Jirapha Pakdee; Natthakul Bunneang; Nuanjun Wichukchinda; Penpitcha Thawong; Pilailuk Akkapaiboon Okada; Pundharika Piboonsiri; Surakameth Mahasirimongkol; Waritta Sawaengdee                                                                                                                                                                                                                                                    |
| EPI_ISL_2433286, EPI_ISL_2433289, EPI_ISL_2433297, EPI_ISL_2433299, EPI_ISL_2433311, EPI_ISL_2433322, EPI_ISL_2433323, EPI_ISL_2433324, EPI_ISL_2433325, EPI_ISL_2433331, EPI_ISL_2433332, EPI_ISL_2433333, EPI_ISL_2433334, EPI_ISL_2433335, EPI_ISL_2433336, EPI_ISL_2433338, EPI_ISL_2433339, EPI_ISL_2433340, EPI_ISL_2433341, EPI_ISL_2433348, EPI_ISL_2433349, EPI_ISL_2433350                                                                                                                                                                                                                                                                                                                                                                                                                                                                                                                                                                                                                                     | Songkhla Hospital                                    | Division of Genomic Medicine and Innovation support,Department of Medical Sciences, Ministry of Public Health, Thailand | Archawin Rojanawiwat; Jirapha Pakdee; Natthakul Bunneang; Nuanjun Wichukchinda; Penpitcha Thawong; Pilailuk Akkapaiboon Okada; Pundharika Piboonsiri; Surakameth Mahasirimongkol; Waritta Sawaengdee                                                                                                                                                                                                                                                    |
| EPI_ISL_2433298, EPI_ISL_2433351, EPI_ISL_2433352, EPI_ISL_2433353, EPI_ISL_2433354, EPI_ISL_2433355, EPI_ISL_2433356, EPI_ISL_2433357, EPI_ISL_2433358, EPI_ISL_2433359, EPI_ISL_2433360, EPI_ISL_2433361, EPI_ISL_2433362, EPI_ISL_2433363                                                                                                                                                                                                                                                                                                                                                                                                                                                                                                                                                                                                                                                                                                                                                                             | Songkhla Provincial Public Health Office             | Division of Genomic Medicine and Innovation support,Department of Medical Sciences, Ministry of Public Health, Thailand | Archawin Rojanawiwat; Jirapha Pakdee; Natthakul Bunneang; Nuanjun Wichukchinda; Penpitcha Thawong; Pilailuk Akkapaiboon Okada; Pundharika Piboonsiri; Surakameth Mahasirimongkol; Waritta Sawaengdee                                                                                                                                                                                                                                                    |
| EPI_ISL_3827356, EPI_ISL_3827458, EPI_ISL_3827474                                                                                                                                                                                                                                                                                                                                                                                                                                                                                                                                                                                                                                                                                                                                                                                                                                                                                                                                                                        | Suddhavej Hospital                                   | Division of Genomic Medicine and Innovation support,Department of Medical Sciences, Ministry of Public Health, Thailand | Archawin Rojanawiwat; Jirapha Pakdee; Natthakul Bunneang; Nuanjun Wichukchinda; Penpitcha Thawong; Pilailuk Akkapaiboon Okada; Pundharika Piboonsiri; Surakameth Mahasirimongkol; Waritta Sawaengdee                                                                                                                                                                                                                                                    |
| EPI_ISL_3827365                                                                                                                                                                                                                                                                                                                                                                                                                                                                                                                                                                                                                                                                                                                                                                                                                                                                                                                                                                                                          | Suwankhuha Hospital                                  | Division of Genomic Medicine and Innovation support,Department of Medical Sciences, Ministry of Public Health, Thailand | Archawin Rojanawiwat; Jirapha Pakdee; Natthakul Bunneang; Nuanjun Wichukchinda; Penpitcha Thawong; Pilailuk Akkapaiboon Okada; Pundharika Piboonsiri; Surakameth Mahasirimongkol; Waritta Sawaengdee                                                                                                                                                                                                                                                    |
| EPI_ISL_3827360, EPI_ISL_3827361, EPI_ISL_3827362                                                                                                                                                                                                                                                                                                                                                                                                                                                                                                                                                                                                                                                                                                                                                                                                                                                                                                                                                                        | Suwannaphum Hospital                                 | Division of Genomic Medicine and Innovation support,Department of Medical Sciences, Ministry of Public Health, Thailand | Archawin Rojanawiwat; Jirapha Pakdee; Natthakul Bunneang; Nuanjun Wichukchinda; Penpitcha Thawong; Pilailuk Akkapaiboon Okada; Pundharika Piboonsiri; Surakameth Mahasirimongkol; Waritta Sawaengdee                                                                                                                                                                                                                                                    |
| EPI_ISL_708821, EPI_ISL_768522                                                                                                                                                                                                                                                                                                                                                                                                                                                                                                                                                                                                                                                                                                                                                                                                                                                                                                                                                                                           | Synphaet Hospital                                    | National Institute of Health, Department of Medical Sciences, Ministry of Public Health, Thailand                       | ; Malinee Chittaganpitch; Natchaya Khiahsang; Pakorn Piromtong; Pilailuk Okada; Ratana Tacharoenmuang; Siripaporn Phuygun; Sittiporn Parmnen; Sunthareeya Waicharoen; Thanutsapa Thanadachakul; Warawan Wongboot; sirikanda wimol                                                                                                                                                                                                                       |
| EPI_ISL_2433294, EPI_ISL_2433309, EPI_ISL_2433453, EPI_ISL_2433454, EPI_ISL_2433455, EPI_ISL_2433456, EPI_ISL_2433457, EPI_ISL_2433458, EPI_ISL_2433459, EPI_ISL_2433460, EPI_ISL_2433461, EPI_ISL_2433462, EPI_ISL_2433463, EPI_ISL_2433464, EPI_ISL_2433465, EPI_ISL_2433466, EPI_ISL_2433467, EPI_ISL_2433468, EPI_ISL_2433469, EPI_ISL_2433470, EPI_ISL_2433471, EPI_ISL_2433472, EPI_ISL_2433553, EPI_ISL_2433558                                                                                                                                                                                                                                                                                                                                                                                                                                                                                                                                                                                                   | Taksin King the Great Hospital                       | Division of Genomic Medicine and Innovation support,Department of Medical Sciences, Ministry of Public Health, Thailand | Archawin Rojanawiwat; Jirapha Pakdee; Natthakul Bunneang; Nuanjun Wichukchinda; Penpitcha Thawong; Pilailuk Akkapaiboon Okada; Pundharika Piboonsiri; Surakameth Mahasirimongkol; Waritta Sawaengdee                                                                                                                                                                                                                                                    |
| EPI_ISL_4235109, EPI_ISL_4235124, EPI_ISL_4235153, EPI_ISL_4235161, EPI_ISL_4235169, EPI_ISL_4235177, EPI_ISL_4235183, EPI_ISL_4235190, EPI_ISL_4235197, EPI_ISL_4235212, EPI_ISL_4235220, EPI_ISL_4235221, EPI_ISL_4235227, EPI_ISL_4235229, EPI_ISL_4235235, EPI_ISL_4235236, EPI_ISL_4235242, EPI_ISL_4235250, EPI_ISL_4235257, EPI_ISL_4235265, EPI_ISL_4235272, EPI_ISL_4235273, EPI_ISL_4235279, EPI_ISL_4235286, EPI_ISL_4235292, EPI_ISL_4235298, EPI_ISL_4235304, EPI_ISL_4235310, EPI_ISL_4235317, EPI_ISL_4235335, EPI_ISL_4235346, EPI_ISL_4557921, EPI_ISL_4557922, EPI_ISL_4647029, EPI_ISL_4647032, EPI_ISL_4647137, EPI_ISL_4647142, EPI_ISL_4647147, EPI_ISL_4647149, EPI_ISL_4647150, EPI_ISL_4647154, EPI_ISL_4647160, EPI_ISL_4647167, EPI_ISL_4647174, EPI_ISL_4647180                                                                                                                                                                                                                              |                                                      |                                                                                                                         |                                                                                                                                                                                                                                                                                                                                                                                                                                                         |

|                                                                                                                                                                                                                                                                                                                                                                                                                                                                                                                                                                                                                                                                                                                                                                                                                                                                                                                                                                                                                                                                                                                                                                                                                                                                                                                                                                                                                                                                                                                                                                                                                                                                                                                                                                                                                                                                                                                                                                                                                                                                                                                                                                                                                                                                                                                                                                                                                                  |                                                                                                                                          |                                                                                                                         |                                                                                                                                                                                                                                                                                                                                                                                                                                                                                                                                                                                                                                                                                                                                                                                                                                                                                                                                                                                                                                         |
|----------------------------------------------------------------------------------------------------------------------------------------------------------------------------------------------------------------------------------------------------------------------------------------------------------------------------------------------------------------------------------------------------------------------------------------------------------------------------------------------------------------------------------------------------------------------------------------------------------------------------------------------------------------------------------------------------------------------------------------------------------------------------------------------------------------------------------------------------------------------------------------------------------------------------------------------------------------------------------------------------------------------------------------------------------------------------------------------------------------------------------------------------------------------------------------------------------------------------------------------------------------------------------------------------------------------------------------------------------------------------------------------------------------------------------------------------------------------------------------------------------------------------------------------------------------------------------------------------------------------------------------------------------------------------------------------------------------------------------------------------------------------------------------------------------------------------------------------------------------------------------------------------------------------------------------------------------------------------------------------------------------------------------------------------------------------------------------------------------------------------------------------------------------------------------------------------------------------------------------------------------------------------------------------------------------------------------------------------------------------------------------------------------------------------------|------------------------------------------------------------------------------------------------------------------------------------------|-------------------------------------------------------------------------------------------------------------------------|-----------------------------------------------------------------------------------------------------------------------------------------------------------------------------------------------------------------------------------------------------------------------------------------------------------------------------------------------------------------------------------------------------------------------------------------------------------------------------------------------------------------------------------------------------------------------------------------------------------------------------------------------------------------------------------------------------------------------------------------------------------------------------------------------------------------------------------------------------------------------------------------------------------------------------------------------------------------------------------------------------------------------------------------|
| see above                                                                                                                                                                                                                                                                                                                                                                                                                                                                                                                                                                                                                                                                                                                                                                                                                                                                                                                                                                                                                                                                                                                                                                                                                                                                                                                                                                                                                                                                                                                                                                                                                                                                                                                                                                                                                                                                                                                                                                                                                                                                                                                                                                                                                                                                                                                                                                                                                        | Taksin hospital                                                                                                                          | Division of Genomic Medicine and Innovation support,Department of Medical Sciences, Ministry of Public Health, Thailand | Archawin Rojanawiwat; Jirapha Pakdee; Natthakul Bunneang; Nuanjun Wichukchinda; Penpitcha Thawong; Pilailuk Akkapalboon Okada; Pundharika Piboonsiri; Surakameth Mahasirimongkol; Waritta Sawaengdee                                                                                                                                                                                                                                                                                                                                                                                                                                                                                                                                                                                                                                                                                                                                                                                                                                    |
| EPI_ISL_4647445, EPI_ISL_4647451, EPI_ISL_4647456, EPI_ISL_4647462, EPI_ISL_4647463, EPI_ISL_4647470, EPI_ISL_4647471, EPI_ISL_4647478                                                                                                                                                                                                                                                                                                                                                                                                                                                                                                                                                                                                                                                                                                                                                                                                                                                                                                                                                                                                                                                                                                                                                                                                                                                                                                                                                                                                                                                                                                                                                                                                                                                                                                                                                                                                                                                                                                                                                                                                                                                                                                                                                                                                                                                                                           |                                                                                                                                          |                                                                                                                         |                                                                                                                                                                                                                                                                                                                                                                                                                                                                                                                                                                                                                                                                                                                                                                                                                                                                                                                                                                                                                                         |
| see above                                                                                                                                                                                                                                                                                                                                                                                                                                                                                                                                                                                                                                                                                                                                                                                                                                                                                                                                                                                                                                                                                                                                                                                                                                                                                                                                                                                                                                                                                                                                                                                                                                                                                                                                                                                                                                                                                                                                                                                                                                                                                                                                                                                                                                                                                                                                                                                                                        | Takupa Hospital                                                                                                                          | Division of Genomic Medicine and Innovation support,Department of Medical Sciences, Ministry of Public Health, Thailand | Archawin Rojanawiwat; Jirapha Pakdee; Natthakul Bunneang; Nuanjun Wichukchinda; Penpitcha Thawong; Pilailuk Akkapalboon Okada; Pundharika Piboonsiri; Surakameth Mahasirimongkol; Waritta Sawaengdee                                                                                                                                                                                                                                                                                                                                                                                                                                                                                                                                                                                                                                                                                                                                                                                                                                    |
| EPI_ISL_2426254, EPI_ISL_2426255, EPI_ISL_2426256, EPI_ISL_2426257, EPI_ISL_2426258, EPI_ISL_2426259                                                                                                                                                                                                                                                                                                                                                                                                                                                                                                                                                                                                                                                                                                                                                                                                                                                                                                                                                                                                                                                                                                                                                                                                                                                                                                                                                                                                                                                                                                                                                                                                                                                                                                                                                                                                                                                                                                                                                                                                                                                                                                                                                                                                                                                                                                                             | Thai Red Cross Emerging Infectious Diseases Clinical Center and Faculty of Medicine, Chulalongkorn University                            | Thai Red Cross Emerging Infectious Diseases Clinical Center and Faculty of Medicine, Chulalongkorn University           | Anthony R. Jones; Chonticha Klungthong; Gompol Suwanpimolkul; Khajohn Joonlasak; Leilani Paitoonpong; Opass Putcharoen; Piyaan Chinnawirotpisan; Stefan Fernandez; Supaporn Wacharapluesadee; Torvorapanit Pattama; Watsamon Jantarabenjakul; Wudtichai Manasatienkij                                                                                                                                                                                                                                                                                                                                                                                                                                                                                                                                                                                                                                                                                                                                                                   |
| EPI_ISL_877227, EPI_ISL_877766, EPI_ISL_918160, EPI_ISL_918161, EPI_ISL_918162, EPI_ISL_918163, EPI_ISL_918166, EPI_ISL_934971, EPI_ISL_934972, EPI_ISL_937531, EPI_ISL_937532, EPI_ISL_937533, EPI_ISL_937534, EPI_ISL_937535, EPI_ISL_937536, EPI_ISL_937537, EPI_ISL_937538, EPI_ISL_937539, EPI_ISL_937540, EPI_ISL_937541, EPI_ISL_937542, EPI_ISL_937543, EPI_ISL_937544, EPI_ISL_956272, EPI_ISL_956275, EPI_ISL_976893, EPI_ISL_976894, EPI_ISL_976895, EPI_ISL_976896, EPI_ISL_976897, EPI_ISL_976898, EPI_ISL_976899, EPI_ISL_976900, EPI_ISL_976901, EPI_ISL_976902, EPI_ISL_976903, EPI_ISL_976904, EPI_ISL_976905, EPI_ISL_976906, EPI_ISL_981004, EPI_ISL_984303, EPI_ISL_984304, EPI_ISL_1007658, EPI_ISL_1007659, EPI_ISL_1117527, EPI_ISL_1117528, EPI_ISL_1278368, EPI_ISL_1278369, EPI_ISL_1278370, EPI_ISL_1278371, EPI_ISL_1278372, EPI_ISL_1278377, EPI_ISL_1296442, EPI_ISL_1296443, EPI_ISL_1296444, EPI_ISL_1296445, EPI_ISL_1296446, EPI_ISL_1296447, EPI_ISL_1296448, EPI_ISL_1296449, EPI_ISL_1296450, EPI_ISL_1296451, EPI_ISL_1296452, EPI_ISL_1296453, EPI_ISL_1296454, EPI_ISL_1296455, EPI_ISL_1296456, EPI_ISL_1296457, EPI_ISL_1296458, EPI_ISL_1296459, EPI_ISL_1296460, EPI_ISL_1296461, EPI_ISL_1296462, EPI_ISL_1296463, EPI_ISL_1708575, EPI_ISL_1969991, EPI_ISL_2566380, EPI_ISL_2566381, EPI_ISL_2566382, EPI_ISL_2566383, EPI_ISL_2566384, EPI_ISL_2566385, EPI_ISL_2566386, EPI_ISL_2566387, EPI_ISL_2566388, EPI_ISL_2566389, EPI_ISL_2566390, EPI_ISL_2566391, EPI_ISL_2566392, EPI_ISL_2566393, EPI_ISL_2566394, EPI_ISL_2566395, EPI_ISL_2566396, EPI_ISL_2566397, EPI_ISL_2566398, EPI_ISL_2566399, EPI_ISL_2566400, EPI_ISL_2566401, EPI_ISL_2566402, EPI_ISL_2566403, EPI_ISL_2566404, EPI_ISL_2566405, EPI_ISL_2566406, EPI_ISL_2566407, EPI_ISL_2566408, EPI_ISL_2566409, EPI_ISL_2566410, EPI_ISL_2566411, EPI_ISL_2566412, EPI_ISL_2566413, EPI_ISL_2566414, EPI_ISL_2566415, EPI_ISL_2566416, EPI_ISL_2566417, EPI_ISL_2566418, EPI_ISL_2566419, EPI_ISL_2566420, EPI_ISL_2566421, EPI_ISL_2566422, EPI_ISL_2566423, EPI_ISL_2566424, EPI_ISL_2566425, EPI_ISL_2566426, EPI_ISL_2566427, EPI_ISL_2566428, EPI_ISL_2566429, EPI_ISL_2566430, EPI_ISL_2566431, EPI_ISL_2566432, EPI_ISL_2566433, EPI_ISL_2566434, EPI_ISL_2566435, EPI_ISL_2566436, EPI_ISL_2566437, EPI_ISL_2566438, EPI_ISL_2566439, EPI_ISL_2566440, EPI_ISL_2566441, EPI_ISL_2566442, EPI_ISL_2566443 |                                                                                                                                          |                                                                                                                         |                                                                                                                                                                                                                                                                                                                                                                                                                                                                                                                                                                                                                                                                                                                                                                                                                                                                                                                                                                                                                                         |
| see above                                                                                                                                                                                                                                                                                                                                                                                                                                                                                                                                                                                                                                                                                                                                                                                                                                                                                                                                                                                                                                                                                                                                                                                                                                                                                                                                                                                                                                                                                                                                                                                                                                                                                                                                                                                                                                                                                                                                                                                                                                                                                                                                                                                                                                                                                                                                                                                                                        | Thai Red Cross Emerging Infectious Diseases Health Science Centre, Chulalongkorn Hospital, Faculty of Medicine, Chulalongkorn University | Thai Red Cross Emerging Infectious Diseases Center and Faculty of Medicine, Chulalongkorn University                    | Anthony R. Jones; Apaporn Rodpan; Chanida Ruchirisarod; Chaniya Jamsaim; Chonticha Klungthong; Duangtip Singhakun; Gompol Suwanpimolkul; Kamolthip Atsawawaranunt; Kanthita Worachotsueptrakun; Khajohn Joonlasak; Krirk Asavametha; Leilani Paitoonpong; M.D.; Non Chindavech; Opass Putcharoen; Panpit Suwangool; Pasin Hemachudha; Pattama Torvorapanit; Piyaan Preaksapanich; Piyaan Chinnawirotpisan; Pomvimon Leethong; Ratchada Kitsommart; Ratima samorn; Rome Buathong; Sininat Petcharat; Sininat Petcharat; Sopon Iamsirithaworn; Stefan Fernandez; Supaporn Wacharapluesadee; Teerada Ponpinit; Thiravat Hemachudha; Thirawat Supharatpariyakorn; Vichan Pawun; Watsamon Jantarabenjakul; Weenassarin Ampoot; Wichai Thanasopon; Wudtichai Manasatienkij; Yutthana Joyjinda; Yutthana Joyjinda ; Natchaya Khadsang; Nuttida Thongpramul; Pakorn Piromtong; Pilailuk Okada; Ratana Tacharoenmuang; Siripaporn Phuygun; Sittiporn Parmnen; Sunthareeya Waicharen; Thanutsapa Thanadachakul; Warawan Wongboot; sirikanda wimol |
| EPI_ISL_3665958                                                                                                                                                                                                                                                                                                                                                                                                                                                                                                                                                                                                                                                                                                                                                                                                                                                                                                                                                                                                                                                                                                                                                                                                                                                                                                                                                                                                                                                                                                                                                                                                                                                                                                                                                                                                                                                                                                                                                                                                                                                                                                                                                                                                                                                                                                                                                                                                                  | Thainakarin Hospital                                                                                                                     | National Institute of Health, Department of Medical Sciences, Ministry of Public Health, Thailand                       |                                                                                                                                                                                                                                                                                                                                                                                                                                                                                                                                                                                                                                                                                                                                                                                                                                                                                                                                                                                                                                         |
| EPI_ISL_434707                                                                                                                                                                                                                                                                                                                                                                                                                                                                                                                                                                                                                                                                                                                                                                                                                                                                                                                                                                                                                                                                                                                                                                                                                                                                                                                                                                                                                                                                                                                                                                                                                                                                                                                                                                                                                                                                                                                                                                                                                                                                                                                                                                                                                                                                                                                                                                                                                   | Thammasat University Hospital                                                                                                            | National Institute of Health, Department of medical Sciences, Ministry of Public Health, Thailand                       | Chittaganpitch; Malinee; Okada; Parmnen; Phuygun; Pilailuk; Siripaporn; Sittiporn; Sunthareeya; Thanadachakul; Thanutsapa; Waicharen; Warawan; Wongboot                                                                                                                                                                                                                                                                                                                                                                                                                                                                                                                                                                                                                                                                                                                                                                                                                                                                                 |
| EPI_ISL_3826472, EPI_ISL_3826476, EPI_ISL_3826525, EPI_ISL_3826526, EPI_ISL_3826527, EPI_ISL_3826768, EPI_ISL_3826770, EPI_ISL_3826782, EPI_ISL_3826792, EPI_ISL_3826793, EPI_ISL_3827177, EPI_ISL_3827338, EPI_ISL_3827339, EPI_ISL_3827340, EPI_ISL_3827341, EPI_ISL_3827342, EPI_ISL_3827343, EPI_ISL_3827344, EPI_ISL_3827345, EPI_ISL_3827446, EPI_ISL_3827461                                                                                                                                                                                                                                                                                                                                                                                                                                                                                                                                                                                                                                                                                                                                                                                                                                                                                                                                                                                                                                                                                                                                                                                                                                                                                                                                                                                                                                                                                                                                                                                                                                                                                                                                                                                                                                                                                                                                                                                                                                                              |                                                                                                                                          |                                                                                                                         |                                                                                                                                                                                                                                                                                                                                                                                                                                                                                                                                                                                                                                                                                                                                                                                                                                                                                                                                                                                                                                         |
| see above                                                                                                                                                                                                                                                                                                                                                                                                                                                                                                                                                                                                                                                                                                                                                                                                                                                                                                                                                                                                                                                                                                                                                                                                                                                                                                                                                                                                                                                                                                                                                                                                                                                                                                                                                                                                                                                                                                                                                                                                                                                                                                                                                                                                                                                                                                                                                                                                                        | The Office of Disease Prevention and Control 6                                                                                           | Division of Genomic Medicine and Innovation support,Department of Medical Sciences, Ministry of Public Health, Thailand | Archawin Rojanawiwat; Jirapha Pakdee; Natthakul Bunneang; Nuanjun Wichukchinda; Penpitcha Thawong; Pilailuk Akkapalboon Okada; Pundharika Piboonsiri; Surakameth Mahasirimongkol; Waritta Sawaengdee                                                                                                                                                                                                                                                                                                                                                                                                                                                                                                                                                                                                                                                                                                                                                                                                                                    |
| EPI_ISL_1497597, EPI_ISL_2877029                                                                                                                                                                                                                                                                                                                                                                                                                                                                                                                                                                                                                                                                                                                                                                                                                                                                                                                                                                                                                                                                                                                                                                                                                                                                                                                                                                                                                                                                                                                                                                                                                                                                                                                                                                                                                                                                                                                                                                                                                                                                                                                                                                                                                                                                                                                                                                                                 | The office of Disease Prevention and Control 6, Chonburi                                                                                 | National Institute of Health, Department of Medical Sciences, Ministry of Public Health, Thailand                       | ; Hathaikan Tanchai; Natchaya Khadsang; Nuttida Thongpramul; Pakorn Piromtong; Pilailuk Okada; Ratana Tacharoenmuang; Siripaporn Phuygun; Sittiporn Parmnen; Sunthareeya Waicharen; Sunthareeya Waicharen.; Thanutsapa Thanadachakul; Thanutsapa Thanadachakul; Warawan Wongboot; sirikanda wimol                                                                                                                                                                                                                                                                                                                                                                                                                                                                                                                                                                                                                                                                                                                                       |
| EPI_ISL_2433302, EPI_ISL_2433473, EPI_ISL_2433474, EPI_ISL_2433475, EPI_ISL_2433476, EPI_ISL_2433477, EPI_ISL_2433497, EPI_ISL_2433498, EPI_ISL_2433499, EPI_ISL_2433500, EPI_ISL_2433501, EPI_ISL_2433502, EPI_ISL_2433503, EPI_ISL_2433504, EPI_ISL_2433505, EPI_ISL_2433506, EPI_ISL_2433507, EPI_ISL_2433508, EPI_ISL_2433509, EPI_ISL_2433510, EPI_ISL_2433511, EPI_ISL_2433512, EPI_ISL_2433513, EPI_ISL_2433514, EPI_ISL_2433515                                                                                                                                                                                                                                                                                                                                                                                                                                                                                                                                                                                                                                                                                                                                                                                                                                                                                                                                                                                                                                                                                                                                                                                                                                                                                                                                                                                                                                                                                                                                                                                                                                                                                                                                                                                                                                                                                                                                                                                          |                                                                                                                                          |                                                                                                                         |                                                                                                                                                                                                                                                                                                                                                                                                                                                                                                                                                                                                                                                                                                                                                                                                                                                                                                                                                                                                                                         |
| see above                                                                                                                                                                                                                                                                                                                                                                                                                                                                                                                                                                                                                                                                                                                                                                                                                                                                                                                                                                                                                                                                                                                                                                                                                                                                                                                                                                                                                                                                                                                                                                                                                                                                                                                                                                                                                                                                                                                                                                                                                                                                                                                                                                                                                                                                                                                                                                                                                        | Trang Hospital                                                                                                                           | Division of Genomic Medicine and Innovation support,Department of Medical Sciences, Ministry of Public Health, Thailand | Archawin Rojanawiwat; Jirapha Pakdee; Natthakul Bunneang; Nuanjun Wichukchinda; Penpitcha Thawong; Pilailuk Akkapalboon Okada; Pundharika Piboonsiri; Surakameth Mahasirimongkol; Waritta Sawaengdee                                                                                                                                                                                                                                                                                                                                                                                                                                                                                                                                                                                                                                                                                                                                                                                                                                    |
| EPI_ISL_455588                                                                                                                                                                                                                                                                                                                                                                                                                                                                                                                                                                                                                                                                                                                                                                                                                                                                                                                                                                                                                                                                                                                                                                                                                                                                                                                                                                                                                                                                                                                                                                                                                                                                                                                                                                                                                                                                                                                                                                                                                                                                                                                                                                                                                                                                                                                                                                                                                   | Trang Hospital                                                                                                                           | National Institute of Health, Department of medical Sciences, Ministry of Public Health, Thailand                       | Chittaganpitch; Malinee; Okada; Parmnen; Phuygun; Pilailuk; Siripaporn; Sittiporn; Sunthareeya; Thanadachakul; Thanutsapa; Waicharen; Warawan; Wongboot                                                                                                                                                                                                                                                                                                                                                                                                                                                                                                                                                                                                                                                                                                                                                                                                                                                                                 |
| EPI_ISL_4557926                                                                                                                                                                                                                                                                                                                                                                                                                                                                                                                                                                                                                                                                                                                                                                                                                                                                                                                                                                                                                                                                                                                                                                                                                                                                                                                                                                                                                                                                                                                                                                                                                                                                                                                                                                                                                                                                                                                                                                                                                                                                                                                                                                                                                                                                                                                                                                                                                  | Trat Hospital                                                                                                                            | Division of Genomic Medicine and Innovation support,Department of Medical Sciences, Ministry of Public Health, Thailand | Archawin Rojanawiwat; Jirapha Pakdee; Natthakul Bunneang; Nuanjun Wichukchinda; Penpitcha Thawong; Pilailuk Akkapalboon Okada; Pundharika Piboonsiri; Surakameth Mahasirimongkol; Waritta Sawaengdee                                                                                                                                                                                                                                                                                                                                                                                                                                                                                                                                                                                                                                                                                                                                                                                                                                    |
| EPI_ISL_3827391                                                                                                                                                                                                                                                                                                                                                                                                                                                                                                                                                                                                                                                                                                                                                                                                                                                                                                                                                                                                                                                                                                                                                                                                                                                                                                                                                                                                                                                                                                                                                                                                                                                                                                                                                                                                                                                                                                                                                                                                                                                                                                                                                                                                                                                                                                                                                                                                                  | Udon Thani Provincial Health Office                                                                                                      | Division of Genomic Medicine and Innovation support,Department of Medical Sciences, Ministry of Public Health, Thailand | Archawin Rojanawiwat; Jirapha Pakdee; Natthakul Bunneang; Nuanjun Wichukchinda; Penpitcha Thawong; Pilailuk Akkapalboon Okada; Pundharika Piboonsiri; Surakameth Mahasirimongkol; Waritta Sawaengdee                                                                                                                                                                                                                                                                                                                                                                                                                                                                                                                                                                                                                                                                                                                                                                                                                                    |
| EPI_ISL_708815, EPI_ISL_708816, EPI_ISL_708817, EPI_ISL_708818, EPI_ISL_708819, EPI_ISL_2840601, EPI_ISL_2840602, EPI_ISL_2840603, EPI_ISL_2840604, EPI_ISL_3342064, EPI_ISL_3342065                                                                                                                                                                                                                                                                                                                                                                                                                                                                                                                                                                                                                                                                                                                                                                                                                                                                                                                                                                                                                                                                                                                                                                                                                                                                                                                                                                                                                                                                                                                                                                                                                                                                                                                                                                                                                                                                                                                                                                                                                                                                                                                                                                                                                                             |                                                                                                                                          |                                                                                                                         |                                                                                                                                                                                                                                                                                                                                                                                                                                                                                                                                                                                                                                                                                                                                                                                                                                                                                                                                                                                                                                         |
| see above                                                                                                                                                                                                                                                                                                                                                                                                                                                                                                                                                                                                                                                                                                                                                                                                                                                                                                                                                                                                                                                                                                                                                                                                                                                                                                                                                                                                                                                                                                                                                                                                                                                                                                                                                                                                                                                                                                                                                                                                                                                                                                                                                                                                                                                                                                                                                                                                                        | Urban Institute for Disease Prevention and Control                                                                                       | National Institute of Health, Department of Medical Sciences, Ministry of Public Health, Thailand                       | ; Malinee Chittaganpitch; Natchaya Khadsang; Natchaya Khadsang; Nuttida Thongpramul; Pakorn Piromtong; Pilailuk Okada; Ratana Tacharoenmuang; Siripaporn Phuygun; Sittiporn Parmnen; Sunthareeya Waicharen; Thanutsapa Thanadachakul; Warawan Wongboot; sirikanda wimol                                                                                                                                                                                                                                                                                                                                                                                                                                                                                                                                                                                                                                                                                                                                                                 |
| EPI_ISL_4647479, EPI_ISL_4647483, EPI_ISL_4647484, EPI_ISL_4647489, EPI_ISL_4647490, EPI_ISL_4647494, EPI_ISL_4647500                                                                                                                                                                                                                                                                                                                                                                                                                                                                                                                                                                                                                                                                                                                                                                                                                                                                                                                                                                                                                                                                                                                                                                                                                                                                                                                                                                                                                                                                                                                                                                                                                                                                                                                                                                                                                                                                                                                                                                                                                                                                                                                                                                                                                                                                                                            |                                                                                                                                          |                                                                                                                         |                                                                                                                                                                                                                                                                                                                                                                                                                                                                                                                                                                                                                                                                                                                                                                                                                                                                                                                                                                                                                                         |
| see above                                                                                                                                                                                                                                                                                                                                                                                                                                                                                                                                                                                                                                                                                                                                                                                                                                                                                                                                                                                                                                                                                                                                                                                                                                                                                                                                                                                                                                                                                                                                                                                                                                                                                                                                                                                                                                                                                                                                                                                                                                                                                                                                                                                                                                                                                                                                                                                                                        | Vachira Phuket Hospital                                                                                                                  | Division of Genomic Medicine and Innovation support,Department of Medical Sciences, Ministry of Public Health, Thailand | Archawin Rojanawiwat; Jirapha Pakdee; Natthakul Bunneang; Nuanjun Wichukchinda; Penpitcha Thawong; Pilailuk Akkapalboon Okada; Pundharika Piboonsiri; Surakameth Mahasirimongkol; Waritta Sawaengdee                                                                                                                                                                                                                                                                                                                                                                                                                                                                                                                                                                                                                                                                                                                                                                                                                                    |
| EPI_ISL_708820                                                                                                                                                                                                                                                                                                                                                                                                                                                                                                                                                                                                                                                                                                                                                                                                                                                                                                                                                                                                                                                                                                                                                                                                                                                                                                                                                                                                                                                                                                                                                                                                                                                                                                                                                                                                                                                                                                                                                                                                                                                                                                                                                                                                                                                                                                                                                                                                                   | Vajira Hospital                                                                                                                          | National Institute of Health, Department of Medical Sciences, Ministry of Public Health, Thailand                       | Malinee Chittaganpitch; Pakorn Piromtong; Pilailuk Okada; Siripaporn Phuygun; Sittiporn Parmnen; Sunthareeya Waicharen; Thanutsapa Thanadachakul; Warawan Wongboot                                                                                                                                                                                                                                                                                                                                                                                                                                                                                                                                                                                                                                                                                                                                                                                                                                                                      |
| EPI_ISL_4235105, EPI_ISL_4235122, EPI_ISL_4235130, EPI_ISL_4235192, EPI_ISL_4235195, EPI_ISL_4235199, EPI_ISL_4235207, EPI_ISL_4235321, EPI_ISL_4647202, EPI_ISL_4647251                                                                                                                                                                                                                                                                                                                                                                                                                                                                                                                                                                                                                                                                                                                                                                                                                                                                                                                                                                                                                                                                                                                                                                                                                                                                                                                                                                                                                                                                                                                                                                                                                                                                                                                                                                                                                                                                                                                                                                                                                                                                                                                                                                                                                                                         |                                                                                                                                          |                                                                                                                         |                                                                                                                                                                                                                                                                                                                                                                                                                                                                                                                                                                                                                                                                                                                                                                                                                                                                                                                                                                                                                                         |
| see above                                                                                                                                                                                                                                                                                                                                                                                                                                                                                                                                                                                                                                                                                                                                                                                                                                                                                                                                                                                                                                                                                                                                                                                                                                                                                                                                                                                                                                                                                                                                                                                                                                                                                                                                                                                                                                                                                                                                                                                                                                                                                                                                                                                                                                                                                                                                                                                                                        | Vibharam Hospital                                                                                                                        | Division of Genomic Medicine and Innovation support,Department of Medical Sciences, Ministry of Public Health, Thailand | Archawin Rojanawiwat; Jirapha Pakdee; Natthakul Bunneang; Nuanjun Wichukchinda; Penpitcha Thawong; Pilailuk Akkapalboon Okada; Pundharika Piboonsiri; Surakameth Mahasirimongkol; Waritta Sawaengdee                                                                                                                                                                                                                                                                                                                                                                                                                                                                                                                                                                                                                                                                                                                                                                                                                                    |
| EPI_ISL_708823                                                                                                                                                                                                                                                                                                                                                                                                                                                                                                                                                                                                                                                                                                                                                                                                                                                                                                                                                                                                                                                                                                                                                                                                                                                                                                                                                                                                                                                                                                                                                                                                                                                                                                                                                                                                                                                                                                                                                                                                                                                                                                                                                                                                                                                                                                                                                                                                                   | Vibharam Hospital                                                                                                                        | National Institute of Health, Department of Medical Sciences, Ministry of Public Health, Thailand                       | Malinee Chittaganpitch; Pakorn Piromtong; Pilailuk Okada; Siripaporn Phuygun; Sittiporn Parmnen; Sunthareeya Waicharen; Thanutsapa Thanadachakul; Warawan Wongboot                                                                                                                                                                                                                                                                                                                                                                                                                                                                                                                                                                                                                                                                                                                                                                                                                                                                      |
| EPI_ISL_3827329                                                                                                                                                                                                                                                                                                                                                                                                                                                                                                                                                                                                                                                                                                                                                                                                                                                                                                                                                                                                                                                                                                                                                                                                                                                                                                                                                                                                                                                                                                                                                                                                                                                                                                                                                                                                                                                                                                                                                                                                                                                                                                                                                                                                                                                                                                                                                                                                                  | Wiang Nong Long Hospital                                                                                                                 | Division of Genomic Medicine and Innovation support,Department of Medical Sciences, Ministry of Public Health, Thailand | Archawin Rojanawiwat; Jirapha Pakdee; Natthakul Bunneang; Nuanjun Wichukchinda; Penpitcha Thawong; Pilailuk Akkapalboon Okada; Pundharika Piboonsiri; Surakameth Mahasirimongkol; Waritta Sawaengdee                                                                                                                                                                                                                                                                                                                                                                                                                                                                                                                                                                                                                                                                                                                                                                                                                                    |
| EPI_ISL_3827305                                                                                                                                                                                                                                                                                                                                                                                                                                                                                                                                                                                                                                                                                                                                                                                                                                                                                                                                                                                                                                                                                                                                                                                                                                                                                                                                                                                                                                                                                                                                                                                                                                                                                                                                                                                                                                                                                                                                                                                                                                                                                                                                                                                                                                                                                                                                                                                                                  | Wiang Pa Pao Hospital                                                                                                                    | Division of Genomic Medicine and Innovation support,Department of Medical Sciences, Ministry of Public Health, Thailand | Archawin Rojanawiwat; Jirapha Pakdee; Natthakul Bunneang; Nuanjun Wichukchinda; Penpitcha Thawong; Pilailuk Akkapalboon Okada; Pundharika Piboonsiri; Surakameth Mahasirimongkol; Waritta Sawaengdee                                                                                                                                                                                                                                                                                                                                                                                                                                                                                                                                                                                                                                                                                                                                                                                                                                    |
| EPI_ISL_1251228                                                                                                                                                                                                                                                                                                                                                                                                                                                                                                                                                                                                                                                                                                                                                                                                                                                                                                                                                                                                                                                                                                                                                                                                                                                                                                                                                                                                                                                                                                                                                                                                                                                                                                                                                                                                                                                                                                                                                                                                                                                                                                                                                                                                                                                                                                                                                                                                                  | Wiset Chai Chan Hospital                                                                                                                 | National Institute of Health, Department of Medical Sciences, Ministry of Public Health, Thailand                       | Hathaikan Tanchai; Natchaya Khadsang; Nuttida Thongpramul; Pakorn Piromtong; Pilailuk Okada; Ratana Tacharoenmuang; Siripaporn Phuygun; Sittiporn Parmnen; Sunthareeya Waicharen.; Thanutsapa Thanadachakul                                                                                                                                                                                                                                                                                                                                                                                                                                                                                                                                                                                                                                                                                                                                                                                                                             |
| EPI_ISL_708812, EPI_ISL_708813, EPI_ISL_708814                                                                                                                                                                                                                                                                                                                                                                                                                                                                                                                                                                                                                                                                                                                                                                                                                                                                                                                                                                                                                                                                                                                                                                                                                                                                                                                                                                                                                                                                                                                                                                                                                                                                                                                                                                                                                                                                                                                                                                                                                                                                                                                                                                                                                                                                                                                                                                                   | World Medical Hospital                                                                                                                   | National Institute of Health, Department of Medical Sciences, Ministry of Public Health, Thailand                       | Malinee Chittaganpitch; Pakorn Piromtong; Pilailuk Okada; Siripaporn Phuygun; Sittiporn Parmnen; Sunthareeya Waicharen; Thanutsapa Thanadachakul; Warawan Wongboot                                                                                                                                                                                                                                                                                                                                                                                                                                                                                                                                                                                                                                                                                                                                                                                                                                                                      |
| EPI_ISL_2433293                                                                                                                                                                                                                                                                                                                                                                                                                                                                                                                                                                                                                                                                                                                                                                                                                                                                                                                                                                                                                                                                                                                                                                                                                                                                                                                                                                                                                                                                                                                                                                                                                                                                                                                                                                                                                                                                                                                                                                                                                                                                                                                                                                                                                                                                                                                                                                                                                  | Yala Hospital                                                                                                                            | Division of Genomic Medicine and Innovation support,Department of Medical Sciences, Ministry of Public Health, Thailand | Archawin Rojanawiwat; Jirapha Pakdee; Natthakul Bunneang; Nuanjun Wichukchinda; Penpitcha Thawong; Pilailuk Akkapalboon Okada; Pundharika Piboonsiri; Surakameth Mahasirimongkol; Waritta Sawaengdee                                                                                                                                                                                                                                                                                                                                                                                                                                                                                                                                                                                                                                                                                                                                                                                                                                    |
| EPI_ISL_450196                                                                                                                                                                                                                                                                                                                                                                                                                                                                                                                                                                                                                                                                                                                                                                                                                                                                                                                                                                                                                                                                                                                                                                                                                                                                                                                                                                                                                                                                                                                                                                                                                                                                                                                                                                                                                                                                                                                                                                                                                                                                                                                                                                                                                                                                                                                                                                                                                   | bumrungrat international hospital                                                                                                        | National Institute of Health, Department of medical Sciences, Ministry of Public Health, Thailand                       | Chittaganpitch; Malinee; Okada; Parmnen; Phuygun; Pilailuk; Siripaporn; Sittiporn; Sunthareeya; Thanadachakul; Thanutsapa; Waicharen; Warawan; Wongboot                                                                                                                                                                                                                                                                                                                                                                                                                                                                                                                                                                                                                                                                                                                                                                                                                                                                                 |
| EPI_ISL_447909, EPI_ISL_447910, EPI_ISL_447911, EPI_ISL_447912, EPI_ISL_447913, EPI_ISL_447914, EPI_ISL_447915, EPI_ISL_447916, EPI_ISL_447917, EPI_ISL_447918, EPI_ISL_447919, EPI_ISL_447920, EPI_ISL_447921                                                                                                                                                                                                                                                                                                                                                                                                                                                                                                                                                                                                                                                                                                                                                                                                                                                                                                                                                                                                                                                                                                                                                                                                                                                                                                                                                                                                                                                                                                                                                                                                                                                                                                                                                                                                                                                                                                                                                                                                                                                                                                                                                                                                                   |                                                                                                                                          |                                                                                                                         |                                                                                                                                                                                                                                                                                                                                                                                                                                                                                                                                                                                                                                                                                                                                                                                                                                                                                                                                                                                                                                         |
| see above                                                                                                                                                                                                                                                                                                                                                                                                                                                                                                                                                                                                                                                                                                                                                                                                                                                                                                                                                                                                                                                                                                                                                                                                                                                                                                                                                                                                                                                                                                                                                                                                                                                                                                                                                                                                                                                                                                                                                                                                                                                                                                                                                                                                                                                                                                                                                                                                                        | n/a                                                                                                                                      | National Institute of Health, Department of medical Sciences, Ministry of Public Health, Thailand                       | Chittaganpitch; Malinee; Okada; Parmnen; Phuygun; Pilailuk; Siripaporn; Sittiporn; Sunthareeya; Thanadachakul; Thanutsapa; Waicharen; Warawan; Wongboot                                                                                                                                                                                                                                                                                                                                                                                                                                                                                                                                                                                                                                                                                                                                                                                                                                                                                 |
| EPI_ISL_430837                                                                                                                                                                                                                                                                                                                                                                                                                                                                                                                                                                                                                                                                                                                                                                                                                                                                                                                                                                                                                                                                                                                                                                                                                                                                                                                                                                                                                                                                                                                                                                                                                                                                                                                                                                                                                                                                                                                                                                                                                                                                                                                                                                                                                                                                                                                                                                                                                   | n/a                                                                                                                                      | Thai National Influenza Center, Department of medical Science, Ministry of Public Health, Thailand                      | Chittaganpitch; Malinee; Okada; Parmnen; Phuygun; Pilailuk; Siripaporn; Sittiporn; Sunthareeya; Thanadachakul; Thanutsapa; Waicharen; Warawan; Wongboot                                                                                                                                                                                                                                                                                                                                                                                                                                                                                                                                                                                                                                                                                                                                                                                                                                                                                 |
| EPI_ISL_437602, EPI_ISL_437603, EPI_ISL_437604, EPI_ISL_437605, EPI_ISL_437606, EPI_ISL_437607, EPI_ISL_437608, EPI_ISL_437609, EPI_ISL_437610, EPI_ISL_437611, EPI_ISL_437612, EPI_ISL_437613, EPI_ISL_437614, EPI_ISL_437615, EPI_ISL_437616, EPI_ISL_437617, EPI_ISL_437618, EPI_ISL_437619, EPI_ISL_437620, EPI_ISL_437621, EPI_ISL_437622, EPI_ISL_437623, EPI_ISL_437624                                                                                                                                                                                                                                                                                                                                                                                                                                                                                                                                                                                                                                                                                                                                                                                                                                                                                                                                                                                                                                                                                                                                                                                                                                                                                                                                                                                                                                                                                                                                                                                                                                                                                                                                                                                                                                                                                                                                                                                                                                                   |                                                                                                                                          |                                                                                                                         |                                                                                                                                                                                                                                                                                                                                                                                                                                                                                                                                                                                                                                                                                                                                                                                                                                                                                                                                                                                                                                         |
| see above                                                                                                                                                                                                                                                                                                                                                                                                                                                                                                                                                                                                                                                                                                                                                                                                                                                                                                                                                                                                                                                                                                                                                                                                                                                                                                                                                                                                                                                                                                                                                                                                                                                                                                                                                                                                                                                                                                                                                                                                                                                                                                                                                                                                                                                                                                                                                                                                                        | unknown                                                                                                                                  | Faculty of Medicine                                                                                                     | Buathong, R.; Bunprakob, S.; Ghai, S.; Joyjinda, Y.; Mungaomklang, A.; Petcharat, S.; Pilpat; Prasithsirikul, W.; Rodpan, A.; Sirichan, N.; T. and Hemachudha, T.; Wacharapluesadee, S.                                                                                                                                                                                                                                                                                                                                                                                                                                                                                                                                                                                                                                                                                                                                                                                                                                                 |
| EPI_ISL_434695, EPI_ISL_434697, EPI_ISL_434708                                                                                                                                                                                                                                                                                                                                                                                                                                                                                                                                                                                                                                                                                                                                                                                                                                                                                                                                                                                                                                                                                                                                                                                                                                                                                                                                                                                                                                                                                                                                                                                                                                                                                                                                                                                                                                                                                                                                                                                                                                                                                                                                                                                                                                                                                                                                                                                   | unknown                                                                                                                                  | National Institute of Health, Department of medical Sciences, Ministry of Public Health, Thailand                       | Chittaganpitch; Malinee; Okada; Parmnen; Phuygun; Pilailuk; Siripaporn; Sittiporn; Sunthareeya; Thanadachakul; Thanutsapa; Waicharen; Warawan; Wongboot                                                                                                                                                                                                                                                                                                                                                                                                                                                                                                                                                                                                                                                                                                                                                                                                                                                                                 |

We gratefully acknowledge the following Authors from the Originating laboratories responsible for obtaining the specimens, as well as the Submitting laboratories where the genome data were generated and shared via GISAID, on which this research is based.

All Submitters of data may be contacted directly via [www.gisaid.org](http://www.gisaid.org)

Authors are sorted alphabetically.

| Accession ID                                                                                                                                                                                                                                                                                                                                                                                                                                                                                                                                                                                                                                                                                                                                                                                                                                                                                                                                                                                                                                                   | Originating Laboratory                                                                   | Submitting Laboratory                                                                                                                                                                                                                         | Authors                                                                                                                                                                                                                            |
|----------------------------------------------------------------------------------------------------------------------------------------------------------------------------------------------------------------------------------------------------------------------------------------------------------------------------------------------------------------------------------------------------------------------------------------------------------------------------------------------------------------------------------------------------------------------------------------------------------------------------------------------------------------------------------------------------------------------------------------------------------------------------------------------------------------------------------------------------------------------------------------------------------------------------------------------------------------------------------------------------------------------------------------------------------------|------------------------------------------------------------------------------------------|-----------------------------------------------------------------------------------------------------------------------------------------------------------------------------------------------------------------------------------------------|------------------------------------------------------------------------------------------------------------------------------------------------------------------------------------------------------------------------------------|
| EPI_ISL_406031, EPI_ISL_420082, EPI_ISL_420083, EPI_ISL_420084, EPI_ISL_420085, EPI_ISL_421641, EPI_ISL_421651, EPI_ISL_428488, EPI_ISL_428489, EPI_ISL_428490, EPI_ISL_428491, EPI_ISL_429882, EPI_ISL_429883, EPI_ISL_429884, EPI_ISL_857314, EPI_ISL_1381386, EPI_ISL_2455264, EPI_ISL_2455327, EPI_ISL_2455329, EPI_ISL_2455330, EPI_ISL_2705575, EPI_ISL_3000157, EPI_ISL_3000160, EPI_ISL_3000409, EPI_ISL_3000790, EPI_ISL_3001055, EPI_ISL_3001368, EPI_ISL_3001841, EPI_ISL_3002178, EPI_ISL_3040140, EPI_ISL_3040141, EPI_ISL_3040142, EPI_ISL_3040143, EPI_ISL_3040144, EPI_ISL_3040145, EPI_ISL_3040146, EPI_ISL_3040147, EPI_ISL_3040148, EPI_ISL_3040149, EPI_ISL_3040151, EPI_ISL_3040152, EPI_ISL_3987576                                                                                                                                                                                                                                                                                                                                      | Centers for Disease Control, R.O.C. (Taiwan)                                             | Centers for Disease Control, R.O.C. (Taiwan)                                                                                                                                                                                                  | Ji-Rong Yang; Jung-Jung Mu; Jung-Jung-Mu; Ming-Tsan Liu; Ming-Tsan-Liu; Shu-Ying Li; Yu-Chi Lin; Yu-Chi-Lin                                                                                                                        |
| see above                                                                                                                                                                                                                                                                                                                                                                                                                                                                                                                                                                                                                                                                                                                                                                                                                                                                                                                                                                                                                                                      |                                                                                          |                                                                                                                                                                                                                                               |                                                                                                                                                                                                                                    |
| EPI_ISL_408489, EPI_ISL_410218, EPI_ISL_413592, EPI_ISL_422407, EPI_ISL_422408, EPI_ISL_422409, EPI_ISL_422410, EPI_ISL_422411, EPI_ISL_422412, EPI_ISL_422413, EPI_ISL_422414, EPI_ISL_422415, EPI_ISL_422416, EPI_ISL_422417, EPI_ISL_422418, EPI_ISL_422419, EPI_ISL_422420, EPI_ISL_422421, EPI_ISL_422422, EPI_ISL_447614, EPI_ISL_447615, EPI_ISL_447616, EPI_ISL_447617, EPI_ISL_447618, EPI_ISL_447619, EPI_ISL_447620, EPI_ISL_447621, EPI_ISL_447622, EPI_ISL_463007, EPI_ISL_534336, EPI_ISL_693302, EPI_ISL_693303, EPI_ISL_693304, EPI_ISL_693305, EPI_ISL_693306, EPI_ISL_738064, EPI_ISL_738065, EPI_ISL_740547, EPI_ISL_872591, EPI_ISL_872592, EPI_ISL_872593, EPI_ISL_872594, EPI_ISL_872595, EPI_ISL_872596, EPI_ISL_872597, EPI_ISL_872598, EPI_ISL_872599, EPI_ISL_1010728, EPI_ISL_1010729, EPI_ISL_1010730, EPI_ISL_1010731, EPI_ISL_1020315, EPI_ISL_1020316, EPI_ISL_1039160, EPI_ISL_1041957, EPI_ISL_1041958, EPI_ISL_1667469, EPI_ISL_1667471, EPI_ISL_1667472, EPI_ISL_1667474, EPI_ISL_1667475, EPI_ISL_2307350, EPI_ISL_3979387 | Department of Laboratory Medicine, National Taiwan University Hospital                   | Microbial Genomics Core Lab, National Taiwan University Centers of Genomic and Precision Medicine                                                                                                                                             | Chiao-Ling Li; Hung-Yi Wang; Pei-Jer Chen; Shan-Chwen Chang; Shiou-Hwei Yeh; Sui-Yuan Chang; Tzi-Yuan Wang; Ya-Yun Lai; You-Yu Lin                                                                                                 |
| EPI_ISL_4169856                                                                                                                                                                                                                                                                                                                                                                                                                                                                                                                                                                                                                                                                                                                                                                                                                                                                                                                                                                                                                                                | Dr.Chiaho Shih                                                                           | Dr.Chiaho Shih                                                                                                                                                                                                                                | An-Ting Liou; Chih-Hsu Chang; Ching-Yi Tsai; Inn-Wen Chong; Jeng-Yi Li; Jer-Ming Chang; Jih-Jin Tsai; Mei-Yeh Jade Lu; Ming-Feng Hou; Ping-Chang Lin; Shang-Jyh Hwang; Wen-Chang Lin; Yu-Chen Cheng; Yuh-Jyh Jong; and Chiaho Shih |
| EPI_ISL_415741, EPI_ISL_415742, EPI_ISL_415743, EPI_ISL_417518, EPI_ISL_417519, EPI_ISL_417520, EPI_ISL_417521, EPI_ISL_417522, EPI_ISL_417523, EPI_ISL_417524, EPI_ISL_417525, EPI_ISL_424969, EPI_ISL_424970, EPI_ISL_424971, EPI_ISL_424972, EPI_ISL_424973, EPI_ISL_424974, EPI_ISL_424975, EPI_ISL_424978, EPI_ISL_444274, EPI_ISL_444275, EPI_ISL_444276, EPI_ISL_444277, EPI_ISL_444278, EPI_ISL_452178, EPI_ISL_452179, EPI_ISL_464092, EPI_ISL_464093, EPI_ISL_464094, EPI_ISL_660543, EPI_ISL_660544, EPI_ISL_660545, EPI_ISL_667807, EPI_ISL_667808, EPI_ISL_667809, EPI_ISL_956317, EPI_ISL_956318, EPI_ISL_956320, EPI_ISL_956321, EPI_ISL_956322, EPI_ISL_956323, EPI_ISL_956324, EPI_ISL_956325, EPI_ISL_956326, EPI_ISL_956327, EPI_ISL_956328, EPI_ISL_956329, EPI_ISL_956330, EPI_ISL_956331, EPI_ISL_2249472, EPI_ISL_2249473, EPI_ISL_2249499, EPI_ISL_2249500, EPI_ISL_2249515, EPI_ISL_2249516, EPI_ISL_2249517, EPI_ISL_2249597, EPI_ISL_2249653, EPI_ISL_2249836, EPI_ISL_2250151, EPI_ISL_2250152, EPI_ISL_2250184                    | Department of Laboratory Medicine, Lin-Kou Chang Gung Memorial Hospital, Taoyuan, Taiwan | Cheng-Hsun Chiu; Cheng-Ta Yang; Chi-Hsien Huang; Chung-Guei Huang; Guang-Wu Chen; Kuang-Tso Le; Kuo-Chien Tsao; Kuo-Ming Lee; Mei-Jen Hsiao; Peng-Nien Huang; Po-Wei Huang; Shin-Ru Shih; Shu-Li Yang; Shu-Min Lin; Yi-Chun Liu; Yu-Nong Gong | Chung-Guei Huang; Kuo-Chien Tsao; Shin-Ru Shih; Shu-Li Yang; Yhu-Chering Huang; Yi-Chun Li; Yu-Nong Gong                                                                                                                           |
| see above                                                                                                                                                                                                                                                                                                                                                                                                                                                                                                                                                                                                                                                                                                                                                                                                                                                                                                                                                                                                                                                      | Laboratory Medicine                                                                      |                                                                                                                                                                                                                                               |                                                                                                                                                                                                                                    |
| EPI_ISL_411915                                                                                                                                                                                                                                                                                                                                                                                                                                                                                                                                                                                                                                                                                                                                                                                                                                                                                                                                                                                                                                                 | Laboratory Medicine                                                                      | Department of Laboratory Medicine, Lin-Kou Chang Gung Memorial Hospital, Taoyuan, Taiwan.                                                                                                                                                     |                                                                                                                                                                                                                                    |
| EPI_ISL_2544700, EPI_ISL_2544701, EPI_ISL_2544702, EPI_ISL_2544703, EPI_ISL_2544704, EPI_ISL_2544705, EPI_ISL_2544706, EPI_ISL_2544707, EPI_ISL_2544708, EPI_ISL_2544709, EPI_ISL_2544710, EPI_ISL_2544711, EPI_ISL_2544712, EPI_ISL_2544713, EPI_ISL_2544714                                                                                                                                                                                                                                                                                                                                                                                                                                                                                                                                                                                                                                                                                                                                                                                                  |                                                                                          |                                                                                                                                                                                                                                               |                                                                                                                                                                                                                                    |
| see above                                                                                                                                                                                                                                                                                                                                                                                                                                                                                                                                                                                                                                                                                                                                                                                                                                                                                                                                                                                                                                                      | Research Center for Emerging Viral Infections, Chang Gung University, Taiwan             | Research Center for Emerging Viral Infections, Chang Gung University, Taiwan                                                                                                                                                                  | Carol Wang; Chung-Guei Huang; Hsiao-Chen Tu; Hui-Ying Weng; Hung-Yu Shu; Jason Su; Jora Lin; Kuo-Ming Lee; Po-Wei Huang; Pocky Lai; Shih-Feng Tsai; Shin-Ru Shih; Shu-Li Yang; Tsu-Lan Wu; Yu-Nong Gong; Yung-Feng Lin             |
| EPI_ISL_426629, EPI_ISL_426630, EPI_ISL_426631, EPI_ISL_426632, EPI_ISL_427392, EPI_ISL_427393, EPI_ISL_427394, EPI_ISL_427395, EPI_ISL_427396, EPI_ISL_427397, EPI_ISL_427398, EPI_ISL_428229, EPI_ISL_428230, EPI_ISL_428231, EPI_ISL_436099, EPI_ISL_436100, EPI_ISL_436101, EPI_ISL_436102, EPI_ISL_436103, EPI_ISL_436104, EPI_ISL_436105, EPI_ISL_436106, EPI_ISL_436107, EPI_ISL_436108, EPI_ISL_447252, EPI_ISL_447253, EPI_ISL_447254, EPI_ISL_447255, EPI_ISL_447256, EPI_ISL_447257, EPI_ISL_447591, EPI_ISL_447592, EPI_ISL_447593, EPI_ISL_457726, EPI_ISL_457730, EPI_ISL_457733, EPI_ISL_458029, EPI_ISL_2692999, EPI_ISL_2693000, EPI_ISL_2693004, EPI_ISL_2693005, EPI_ISL_2693006, EPI_ISL_4096803, EPI_ISL_4096805, EPI_ISL_4096807, EPI_ISL_4578347                                                                                                                                                                                                                                                                                        | TSGH-CP molecular lab                                                                    | Cheng-Lih Perng; Chien-Wen Chen; Chih-Kai Chang; Feng-Yee Chang; Hsing-Yi Chung; Hung-Sheng Shang; Jung-Chung Lin; Kuo-Ming Yeh; Kuo-Sheng Hung; Ming-Jr JIAN; Ming-Jr Jian; Sheng-Kang Chiu; Shih-Hung Tsai; Tien-Yao Chang                  | Cherng-Lih Perng; Chien-Wen Chen; Chih-Kai Chang; Feng-Yee Chang; Hsing-Yi Chung; Hung-Sheng Shang; Jung-Chung Lin; Kuo-Ming Yeh; Kuo-Sheng Hung; Ming-Jr JIAN; Ming-Jr Jian; Sheng-Kang Chiu; Shih-Hung Tsai; Tien-Yao Chang      |
| EPI_ISL_437336                                                                                                                                                                                                                                                                                                                                                                                                                                                                                                                                                                                                                                                                                                                                                                                                                                                                                                                                                                                                                                                 | TSGH-CP molecular lab, Division of Clinical Pathology, Department of Pathology           | TSGH-CP molecular lab, Division of Clinical Pathology, Department of Pathology                                                                                                                                                                |                                                                                                                                                                                                                                    |
| EPI_ISL_411926, EPI_ISL_411927                                                                                                                                                                                                                                                                                                                                                                                                                                                                                                                                                                                                                                                                                                                                                                                                                                                                                                                                                                                                                                 | Taiwan Centers for Disease Control                                                       | Taiwan Centers for Disease Control                                                                                                                                                                                                            | Ji-Rong Yang; Jung-Jung Mu; Ming-Tsan-Liu; Yu-Chi-Lin                                                                                                                                                                              |
| EPI_ISL_493198, EPI_ISL_493199, EPI_ISL_493200, EPI_ISL_493201, EPI_ISL_493202, EPI_ISL_493203, EPI_ISL_493204, EPI_ISL_493205, EPI_ISL_493206, EPI_ISL_493207, EPI_ISL_493208, EPI_ISL_494747                                                                                                                                                                                                                                                                                                                                                                                                                                                                                                                                                                                                                                                                                                                                                                                                                                                                 |                                                                                          |                                                                                                                                                                                                                                               |                                                                                                                                                                                                                                    |
| see above                                                                                                                                                                                                                                                                                                                                                                                                                                                                                                                                                                                                                                                                                                                                                                                                                                                                                                                                                                                                                                                      | Virology Lab,Department of Pathology, National Cheng Kung University Hospital            | Virology Lab,Department of Pathology, National Cheng Kung University Hospital                                                                                                                                                                 | Huey-Pin Tsai; Huey-Pin Tsai et al; et al                                                                                                                                                                                          |



[illegible]

[illegible]



|                                                                                                                                                                                                                                                                                                                                                                                                                                                                                                                                                                                                                                                                                                                                                                                                                                                                                                                                                                                                                                                                                                                                                                                                                                                                                                                                                                                                                                                                                                                                                                                                                                                                                                                                                                                                                                                                                                                                                                                                                                                                                                                                                                                                                                                                                                                                                                                                                                                                                                                                                                                                                                                                                                                                                                                                                                                                                                                                                                                                                                                                                                                                                                                                                                                                                                                                                                                                                                                                                                                                                                                                                                                                                                                                                                                                                                                                                                                                                                                                                                                                                                                                                                                                |                                                                                                                                                                                                                                                |                                                                                                                                       |                                                                                                                                                                                       |                                                                                                                                                                                                       |
|------------------------------------------------------------------------------------------------------------------------------------------------------------------------------------------------------------------------------------------------------------------------------------------------------------------------------------------------------------------------------------------------------------------------------------------------------------------------------------------------------------------------------------------------------------------------------------------------------------------------------------------------------------------------------------------------------------------------------------------------------------------------------------------------------------------------------------------------------------------------------------------------------------------------------------------------------------------------------------------------------------------------------------------------------------------------------------------------------------------------------------------------------------------------------------------------------------------------------------------------------------------------------------------------------------------------------------------------------------------------------------------------------------------------------------------------------------------------------------------------------------------------------------------------------------------------------------------------------------------------------------------------------------------------------------------------------------------------------------------------------------------------------------------------------------------------------------------------------------------------------------------------------------------------------------------------------------------------------------------------------------------------------------------------------------------------------------------------------------------------------------------------------------------------------------------------------------------------------------------------------------------------------------------------------------------------------------------------------------------------------------------------------------------------------------------------------------------------------------------------------------------------------------------------------------------------------------------------------------------------------------------------------------------------------------------------------------------------------------------------------------------------------------------------------------------------------------------------------------------------------------------------------------------------------------------------------------------------------------------------------------------------------------------------------------------------------------------------------------------------------------------------------------------------------------------------------------------------------------------------------------------------------------------------------------------------------------------------------------------------------------------------------------------------------------------------------------------------------------------------------------------------------------------------------------------------------------------------------------------------------------------------------------------------------------------------------------------------------------------------------------------------------------------------------------------------------------------------------------------------------------------------------------------------------------------------------------------------------------------------------------------------------------------------------------------------------------------------------------------------------------------------------------------------------------------------|------------------------------------------------------------------------------------------------------------------------------------------------------------------------------------------------------------------------------------------------|---------------------------------------------------------------------------------------------------------------------------------------|---------------------------------------------------------------------------------------------------------------------------------------------------------------------------------------|-------------------------------------------------------------------------------------------------------------------------------------------------------------------------------------------------------|
| EPI_ISL_514888, EPI_ISL_514889, EPI_ISL_514890, EPI_ISL_514891, EPI_ISL_514892, EPI_ISL_514893, EPI_ISL_514894, EPI_ISL_514895, EPI_ISL_514896, EPI_ISL_514897, EPI_ISL_514898, EPI_ISL_514899, EPI_ISL_514900, EPI_ISL_514901, EPI_ISL_514902, EPI_ISL_514903, EPI_ISL_514904, EPI_ISL_514905, EPI_ISL_514906, EPI_ISL_514907, EPI_ISL_514908, EPI_ISL_514909, EPI_ISL_514910, EPI_ISL_514911, EPI_ISL_514912, EPI_ISL_514913, EPI_ISL_514914, EPI_ISL_514915, EPI_ISL_514916, EPI_ISL_514917, EPI_ISL_514918, EPI_ISL_514919, EPI_ISL_514920, EPI_ISL_514921, EPI_ISL_514922, EPI_ISL_514923, EPI_ISL_514924, EPI_ISL_514925, EPI_ISL_514926, EPI_ISL_514927, EPI_ISL_514928, EPI_ISL_514929, EPI_ISL_514930, EPI_ISL_514931, EPI_ISL_514932, EPI_ISL_514933, EPI_ISL_514934, EPI_ISL_514935, EPI_ISL_514936, EPI_ISL_514937, EPI_ISL_514938, EPI_ISL_514939, EPI_ISL_514940, EPI_ISL_514941, EPI_ISL_514942, EPI_ISL_514943, EPI_ISL_514944, EPI_ISL_514945, EPI_ISL_514946, EPI_ISL_514947, EPI_ISL_514948, EPI_ISL_514949, EPI_ISL_514950, EPI_ISL_514951, EPI_ISL_514952, EPI_ISL_514953, EPI_ISL_514954, EPI_ISL_514955, EPI_ISL_514956, EPI_ISL_514957, EPI_ISL_514958, EPI_ISL_514959, EPI_ISL_514960, EPI_ISL_514961, EPI_ISL_514962, EPI_ISL_514963, EPI_ISL_514964, EPI_ISL_514965, EPI_ISL_514966, EPI_ISL_514967, EPI_ISL_514968, EPI_ISL_514969, EPI_ISL_514970, EPI_ISL_514971, EPI_ISL_514972, EPI_ISL_514973, EPI_ISL_514974, EPI_ISL_514975, EPI_ISL_514976, EPI_ISL_514977, EPI_ISL_514978, EPI_ISL_514979, EPI_ISL_514980, EPI_ISL_514981, EPI_ISL_514982, EPI_ISL_514983, EPI_ISL_514984, EPI_ISL_514985, EPI_ISL_514986, EPI_ISL_514987, EPI_ISL_514988, EPI_ISL_514989, EPI_ISL_514990, EPI_ISL_514991, EPI_ISL_514992, EPI_ISL_514993, EPI_ISL_514994, EPI_ISL_514995, EPI_ISL_514996, EPI_ISL_514997, EPI_ISL_514998, EPI_ISL_514999, EPI_ISL_515000, EPI_ISL_515001, EPI_ISL_515002, EPI_ISL_515003, EPI_ISL_515004, EPI_ISL_515005, EPI_ISL_515006, EPI_ISL_515007, EPI_ISL_515008, EPI_ISL_515009, EPI_ISL_515010, EPI_ISL_515011, EPI_ISL_515012, EPI_ISL_515013, EPI_ISL_515014, EPI_ISL_515015, EPI_ISL_515016, EPI_ISL_515017, EPI_ISL_515018, EPI_ISL_515019, EPI_ISL_515020, EPI_ISL_515021, EPI_ISL_515022, EPI_ISL_515023, EPI_ISL_515024, EPI_ISL_515025, EPI_ISL_515026, EPI_ISL_515027, EPI_ISL_515028, EPI_ISL_515029, EPI_ISL_515030, EPI_ISL_515031, EPI_ISL_515032, EPI_ISL_515033, EPI_ISL_515034, EPI_ISL_515035, EPI_ISL_515036, EPI_ISL_515037, EPI_ISL_515038, EPI_ISL_515039, EPI_ISL_515040, EPI_ISL_515041, EPI_ISL_515042, EPI_ISL_515043, EPI_ISL_515044, EPI_ISL_515045, EPI_ISL_515046, EPI_ISL_515047, EPI_ISL_515048, EPI_ISL_515049, EPI_ISL_515050, EPI_ISL_515051, EPI_ISL_515052, EPI_ISL_515053, EPI_ISL_515054, EPI_ISL_522454, EPI_ISL_522465, EPI_ISL_522466, EPI_ISL_522474, EPI_ISL_522475, EPI_ISL_522477, EPI_ISL_522478, EPI_ISL_522484, EPI_ISL_522486, EPI_ISL_522487, EPI_ISL_522488, EPI_ISL_522489, EPI_ISL_522490, EPI_ISL_522498, EPI_ISL_522499, EPI_ISL_522500, EPI_ISL_522501, EPI_ISL_522503, EPI_ISL_522504, EPI_ISL_522506, EPI_ISL_522507, EPI_ISL_522509, EPI_ISL_522511, EPI_ISL_522512, EPI_ISL_522513, EPI_ISL_522514, EPI_ISL_522517, EPI_ISL_522519, EPI_ISL_522520, EPI_ISL_522521, EPI_ISL_522522, EPI_ISL_522523, EPI_ISL_522524, EPI_ISL_522525, EPI_ISL_522526, EPI_ISL_522527, EPI_ISL_522528, EPI_ISL_522529, EPI_ISL_522530, EPI_ISL_522531, EPI_ISL_522532, EPI_ISL_522533, EPI_ISL_522534, EPI_ISL_522535, EPI_ISL_522536, EPI_ISL_522537, EPI_ISL_522538, EPI_ISL_522539, EPI_ISL_522540, EPI_ISL_522541, EPI_ISL_522542, EPI_ISL_522543, EPI_ISL_522544, EPI_ISL_526700, EPI_ISL_526701, EPI_ISL_526702, EPI_ISL_526703, EPI_ISL_526704, EPI_ISL_526705, EPI_ISL_526706, EPI_ISL_526707, EPI_ISL_526708, EPI_ISL_526709, EPI_ISL_526710, EPI_ISL_526711, EPI_ISL_526712, EPI_ISL_526713, EPI_ISL_526714, EPI_ISL_526715, EPI_ISL_526716, EPI_ISL_526717, EPI_ISL_526718, EPI_ISL_526719, EPI_ISL_526720, EPI_ISL_526721, EPI_ISL_526722, EPI_ISL_526723, EPI_ISL_526724, EPI_ISL_526725, EPI_ISL_526726, EPI_ISL_526727, EPI_ISL_526728, EPI_ISL_526729, EPI_ISL_526732, EPI_ISL_526733 | see above                                                                                                                                                                                                                                      | Division of Viral Diseases, Center for Laboratory Control of Infectious Diseases, Korea Centers for Diseases Control and Prevention   | Division of Viral Diseases, Center for Laboratory Control of Infectious Diseases, Korea Centers for Diseases Control and Prevention                                                   | Daesang Lee; Dong Hyun Song; Heui Man Kim; Hye-Jun Jo; Jeong-Min Kim; Jun-Sub Kim; Junhyeong Jang; Mi-Seon Kim; Myung Guk Han; Namjoo Lee; Sang Hee Woo; Sehee Park; Seong Tae Jeong; Yoon-Seok Chung |
| EPI_ISL_541942                                                                                                                                                                                                                                                                                                                                                                                                                                                                                                                                                                                                                                                                                                                                                                                                                                                                                                                                                                                                                                                                                                                                                                                                                                                                                                                                                                                                                                                                                                                                                                                                                                                                                                                                                                                                                                                                                                                                                                                                                                                                                                                                                                                                                                                                                                                                                                                                                                                                                                                                                                                                                                                                                                                                                                                                                                                                                                                                                                                                                                                                                                                                                                                                                                                                                                                                                                                                                                                                                                                                                                                                                                                                                                                                                                                                                                                                                                                                                                                                                                                                                                                                                                                 | EPI_ISL_540993, EPI_ISL_540994, EPI_ISL_540995, EPI_ISL_540996, EPI_ISL_540997, EPI_ISL_540998, EPI_ISL_540999, EPI_ISL_541000, EPI_ISL_541001, EPI_ISL_541002, EPI_ISL_541003, EPI_ISL_541004, EPI_ISL_541005, EPI_ISL_541006, EPI_ISL_541007 | Health and Environmental Research Institute of Gwangju                                                                                | Health & Environment Institute of Gwangju                                                                                                                                             | Ji-eun Lee; Min Ji Kim                                                                                                                                                                                |
| see above                                                                                                                                                                                                                                                                                                                                                                                                                                                                                                                                                                                                                                                                                                                                                                                                                                                                                                                                                                                                                                                                                                                                                                                                                                                                                                                                                                                                                                                                                                                                                                                                                                                                                                                                                                                                                                                                                                                                                                                                                                                                                                                                                                                                                                                                                                                                                                                                                                                                                                                                                                                                                                                                                                                                                                                                                                                                                                                                                                                                                                                                                                                                                                                                                                                                                                                                                                                                                                                                                                                                                                                                                                                                                                                                                                                                                                                                                                                                                                                                                                                                                                                                                                                      | Health and Environmental Research Institute of Gwangju Metropolitan city                                                                                                                                                                       | Health and Environmental Research Institute of Gwangju Metropolitan city                                                              | Ji-eun Lee; Min Ji Kim                                                                                                                                                                |                                                                                                                                                                                                       |
| EPI_ISL_407193                                                                                                                                                                                                                                                                                                                                                                                                                                                                                                                                                                                                                                                                                                                                                                                                                                                                                                                                                                                                                                                                                                                                                                                                                                                                                                                                                                                                                                                                                                                                                                                                                                                                                                                                                                                                                                                                                                                                                                                                                                                                                                                                                                                                                                                                                                                                                                                                                                                                                                                                                                                                                                                                                                                                                                                                                                                                                                                                                                                                                                                                                                                                                                                                                                                                                                                                                                                                                                                                                                                                                                                                                                                                                                                                                                                                                                                                                                                                                                                                                                                                                                                                                                                 | Korea Centers for Disease Control & Prevention (KCDC) Center for Laboratory Control of Infectious Diseases Division of Viral Diseases                                                                                                          | Korea Centers for Disease Control & Prevention (KCDC) Center for Laboratory Control of Infectious Diseases Division of Viral Diseases | Heui Man Kim; Hye-Joon Jo; Jeong-Min Kim; Mi-Seon Kim; Myung Guk Han; Namjoo Lee; SangHee Woo; Sehee Park; Yoon-Seok Chung                                                            |                                                                                                                                                                                                       |
| EPI_ISL_3026044                                                                                                                                                                                                                                                                                                                                                                                                                                                                                                                                                                                                                                                                                                                                                                                                                                                                                                                                                                                                                                                                                                                                                                                                                                                                                                                                                                                                                                                                                                                                                                                                                                                                                                                                                                                                                                                                                                                                                                                                                                                                                                                                                                                                                                                                                                                                                                                                                                                                                                                                                                                                                                                                                                                                                                                                                                                                                                                                                                                                                                                                                                                                                                                                                                                                                                                                                                                                                                                                                                                                                                                                                                                                                                                                                                                                                                                                                                                                                                                                                                                                                                                                                                                | Laboratory Medicine, Hallym University College of Medicine                                                                                                                                                                                     | Laboratory Medicine, Hallym University College of Medicine                                                                            | J.-S.; Kim                                                                                                                                                                            |                                                                                                                                                                                                       |
| EPI_ISL_1038791, EPI_ISL_1038792                                                                                                                                                                                                                                                                                                                                                                                                                                                                                                                                                                                                                                                                                                                                                                                                                                                                                                                                                                                                                                                                                                                                                                                                                                                                                                                                                                                                                                                                                                                                                                                                                                                                                                                                                                                                                                                                                                                                                                                                                                                                                                                                                                                                                                                                                                                                                                                                                                                                                                                                                                                                                                                                                                                                                                                                                                                                                                                                                                                                                                                                                                                                                                                                                                                                                                                                                                                                                                                                                                                                                                                                                                                                                                                                                                                                                                                                                                                                                                                                                                                                                                                                                               | US Air Force School of Aerospace Medicine                                                                                                                                                                                                      | US Air Force School of Aerospace Medicine                                                                                             | Amanda Javorina; Anthony Fries; Clarise Starr; Elizabeth Macias; Jennifer Meyer; Sarah Purves; William Buggele; William Gruner                                                        |                                                                                                                                                                                                       |
| EPI_ISL_485001, EPI_ISL_485002, EPI_ISL_485388, EPI_ISL_485389, EPI_ISL_485390, EPI_ISL_485391, EPI_ISL_485392, EPI_ISL_485393, EPI_ISL_485394, EPI_ISL_485395, EPI_ISL_485396                                                                                                                                                                                                                                                                                                                                                                                                                                                                                                                                                                                                                                                                                                                                                                                                                                                                                                                                                                                                                                                                                                                                                                                                                                                                                                                                                                                                                                                                                                                                                                                                                                                                                                                                                                                                                                                                                                                                                                                                                                                                                                                                                                                                                                                                                                                                                                                                                                                                                                                                                                                                                                                                                                                                                                                                                                                                                                                                                                                                                                                                                                                                                                                                                                                                                                                                                                                                                                                                                                                                                                                                                                                                                                                                                                                                                                                                                                                                                                                                                 | University of Ulsan College of Medicine and Asan Medical Center                                                                                                                                                                                | University of Ulsan College of Medicine and Asan Medical Center                                                                       | Heungsup Sung; Jaewoong Lee; Jina Lee; Jiwon Jung; Jongsik Chun; Kihyun Lee; Kuenyoul Park; Kyu-Hwa Hur; Mauricio Chalita; Mi-Na Kim; Seok-Hwan Yoon; Sung-Han Kim; and Hae Kyung Lee |                                                                                                                                                                                                       |
| see above                                                                                                                                                                                                                                                                                                                                                                                                                                                                                                                                                                                                                                                                                                                                                                                                                                                                                                                                                                                                                                                                                                                                                                                                                                                                                                                                                                                                                                                                                                                                                                                                                                                                                                                                                                                                                                                                                                                                                                                                                                                                                                                                                                                                                                                                                                                                                                                                                                                                                                                                                                                                                                                                                                                                                                                                                                                                                                                                                                                                                                                                                                                                                                                                                                                                                                                                                                                                                                                                                                                                                                                                                                                                                                                                                                                                                                                                                                                                                                                                                                                                                                                                                                                      | University of Ulsan College of Medicine and Asan Medical Center                                                                                                                                                                                | University of Ulsan College of Medicine and Asan Medical Center                                                                       |                                                                                                                                                                                       |                                                                                                                                                                                                       |

[illegible]

[illegible]

|                 |                                                                                                                                        |                                                                                                                                        |                                                                                                                                            |
|-----------------|----------------------------------------------------------------------------------------------------------------------------------------|----------------------------------------------------------------------------------------------------------------------------------------|--------------------------------------------------------------------------------------------------------------------------------------------|
| see above       | Division of Emerging Infectious Diseases, Bureau of Infectious Diseases Diagnosis Control, Korea Disease Control and Prevention Agency | Division of Emerging Infectious Diseases, Bureau of Infectious Diseases Diagnosis Control, Korea Disease Control and Prevention Agency | Ae Kyung Park; Chae Young Lee; Eun-Jin Kim; Heui Man Kim; Il-Hwan Kim; Jaehee Lee; Jeong-Ah Kim; Jeong Min Kim; Namjoong Lee; Sang Hee Woo |
| EPI_ISL_3411836 | Division of Infectious Diseases, Department of Internal Medicine, Yonsei University College of Medicine                                | Department of Biotechnology, Yonsei University                                                                                         | Jun Yong Choi <sup>1</sup> ; Jung Ho Kim; Minwoo Kim; Yoon-Jung Lee; and Jong-Won Oh <sup>2</sup>                                          |

[illegible]

[illegible]



|                                                                                                                                                                                                                                                                                                                                                                                                                                                                                                                                                                                                                                                                                                                                                                                                                                                                                                                                                                                                                                                                                                                                                                                                                                                                                                                                                                                                                                                                                                                                                                                                                                                                                                                                                                                                                                                                                                                                                                                                                                                                                                                                                                                                                                                                                                                                                                                                                                                                                                                                                                                                                                                                                                                                                                                                                                                                                                                                                                                                                                                                                                                                                                                                                                                                                                                                                                                                                                                                                                                                                                                                                                                                                                                                                                                                                                                                                                                                                                                                                                                                                                                                                                                                                                                                                                                                                                                                                                                                                                                                                                                                                                                                                                                                                                                                                                                                                                                                                                                                                                                                                                                                            |                                                                            |                                                                            |                                                                                                                                                                                                                                                                                                                 |
|--------------------------------------------------------------------------------------------------------------------------------------------------------------------------------------------------------------------------------------------------------------------------------------------------------------------------------------------------------------------------------------------------------------------------------------------------------------------------------------------------------------------------------------------------------------------------------------------------------------------------------------------------------------------------------------------------------------------------------------------------------------------------------------------------------------------------------------------------------------------------------------------------------------------------------------------------------------------------------------------------------------------------------------------------------------------------------------------------------------------------------------------------------------------------------------------------------------------------------------------------------------------------------------------------------------------------------------------------------------------------------------------------------------------------------------------------------------------------------------------------------------------------------------------------------------------------------------------------------------------------------------------------------------------------------------------------------------------------------------------------------------------------------------------------------------------------------------------------------------------------------------------------------------------------------------------------------------------------------------------------------------------------------------------------------------------------------------------------------------------------------------------------------------------------------------------------------------------------------------------------------------------------------------------------------------------------------------------------------------------------------------------------------------------------------------------------------------------------------------------------------------------------------------------------------------------------------------------------------------------------------------------------------------------------------------------------------------------------------------------------------------------------------------------------------------------------------------------------------------------------------------------------------------------------------------------------------------------------------------------------------------------------------------------------------------------------------------------------------------------------------------------------------------------------------------------------------------------------------------------------------------------------------------------------------------------------------------------------------------------------------------------------------------------------------------------------------------------------------------------------------------------------------------------------------------------------------------------------------------------------------------------------------------------------------------------------------------------------------------------------------------------------------------------------------------------------------------------------------------------------------------------------------------------------------------------------------------------------------------------------------------------------------------------------------------------------------------------------------------------------------------------------------------------------------------------------------------------------------------------------------------------------------------------------------------------------------------------------------------------------------------------------------------------------------------------------------------------------------------------------------------------------------------------------------------------------------------------------------------------------------------------------------------------------------------------------------------------------------------------------------------------------------------------------------------------------------------------------------------------------------------------------------------------------------------------------------------------------------------------------------------------------------------------------------------------------------------------------------------------------------------------|----------------------------------------------------------------------------|----------------------------------------------------------------------------|-----------------------------------------------------------------------------------------------------------------------------------------------------------------------------------------------------------------------------------------------------------------------------------------------------------------|
| see above                                                                                                                                                                                                                                                                                                                                                                                                                                                                                                                                                                                                                                                                                                                                                                                                                                                                                                                                                                                                                                                                                                                                                                                                                                                                                                                                                                                                                                                                                                                                                                                                                                                                                                                                                                                                                                                                                                                                                                                                                                                                                                                                                                                                                                                                                                                                                                                                                                                                                                                                                                                                                                                                                                                                                                                                                                                                                                                                                                                                                                                                                                                                                                                                                                                                                                                                                                                                                                                                                                                                                                                                                                                                                                                                                                                                                                                                                                                                                                                                                                                                                                                                                                                                                                                                                                                                                                                                                                                                                                                                                                                                                                                                                                                                                                                                                                                                                                                                                                                                                                                                                                                                  | National Public Health Laboratory, National Centre for Infectious Diseases | National Public Health Laboratory, National Centre for Infectious Diseases | Chavatte JM; Chavatte Jean-Marc; Cui L; Cui Lin; Grace jie Yin Ngan; Grace Ngan; Grace Ngan jie Yin; Katherine Ching; Lin Cui; Lin RTP; Lin Raymond Tzer Pin; Mak TM; Mak Tze Minn; Octavia S; Octavia Sophie; Raymond Tzer Pin Lin; Royce Ang; Samuel Loo; Sophie Octavia; Tze Minn Mak; Zhenyang Zhou; Zhou Z |
| EPI_ISL_574479, EPI_ISL_574480, EPI_ISL_574481, EPI_ISL_574482, EPI_ISL_574483, EPI_ISL_574484, EPI_ISL_574485, EPI_ISL_574486, EPI_ISL_574487, EPI_ISL_574488, EPI_ISL_574489, EPI_ISL_574490, EPI_ISL_574491, EPI_ISL_574492                                                                                                                                                                                                                                                                                                                                                                                                                                                                                                                                                                                                                                                                                                                                                                                                                                                                                                                                                                                                                                                                                                                                                                                                                                                                                                                                                                                                                                                                                                                                                                                                                                                                                                                                                                                                                                                                                                                                                                                                                                                                                                                                                                                                                                                                                                                                                                                                                                                                                                                                                                                                                                                                                                                                                                                                                                                                                                                                                                                                                                                                                                                                                                                                                                                                                                                                                                                                                                                                                                                                                                                                                                                                                                                                                                                                                                                                                                                                                                                                                                                                                                                                                                                                                                                                                                                                                                                                                                                                                                                                                                                                                                                                                                                                                                                                                                                                                                             | see above                                                                  | Programme in Emerging Infectious Diseases, Duke-NUS Medical School         | Adrian Eng Zheng Kang; Danielle E Anderson; Lin Cui; Raymond Tzer Pin Lin; Sophie Octavia; Tze Minn Mak; Zhenyang Zhou                                                                                                                                                                                          |
| EPI_ISL_462085, EPI_ISL_462086, EPI_ISL_462087, EPI_ISL_462088, EPI_ISL_462089, EPI_ISL_462090, EPI_ISL_462091, EPI_ISL_462092, EPI_ISL_462093, EPI_ISL_462094, EPI_ISL_462095, EPI_ISL_462096, EPI_ISL_462097, EPI_ISL_462098, EPI_ISL_462099, EPI_ISL_462100, EPI_ISL_462101, EPI_ISL_462102, EPI_ISL_462103, EPI_ISL_462104, EPI_ISL_462105, EPI_ISL_462106, EPI_ISL_462107, EPI_ISL_462108, EPI_ISL_462109, EPI_ISL_462110, EPI_ISL_462111, EPI_ISL_462112, EPI_ISL_462113, EPI_ISL_462114, EPI_ISL_462115, EPI_ISL_462116, EPI_ISL_462117, EPI_ISL_462118, EPI_ISL_462119, EPI_ISL_462120, EPI_ISL_462121, EPI_ISL_462122, EPI_ISL_462123, EPI_ISL_462124, EPI_ISL_462125, EPI_ISL_462126, EPI_ISL_462127, EPI_ISL_462128, EPI_ISL_462129, EPI_ISL_462130, EPI_ISL_462131, EPI_ISL_462132, EPI_ISL_462133, EPI_ISL_462134, EPI_ISL_462135, EPI_ISL_462136, EPI_ISL_462137, EPI_ISL_462138, EPI_ISL_462139, EPI_ISL_462140, EPI_ISL_462141, EPI_ISL_462142, EPI_ISL_462143, EPI_ISL_462144, EPI_ISL_462145, EPI_ISL_462146, EPI_ISL_462147, EPI_ISL_462148, EPI_ISL_462149, EPI_ISL_462150, EPI_ISL_462151, EPI_ISL_462152, EPI_ISL_462153, EPI_ISL_462154, EPI_ISL_462155, EPI_ISL_462156, EPI_ISL_462157, EPI_ISL_462158, EPI_ISL_462159, EPI_ISL_462160, EPI_ISL_462161, EPI_ISL_462162, EPI_ISL_462163, EPI_ISL_462164, EPI_ISL_462165, EPI_ISL_462166, EPI_ISL_462167, EPI_ISL_462168, EPI_ISL_462169, EPI_ISL_462170, EPI_ISL_462171, EPI_ISL_462172, EPI_ISL_462173, EPI_ISL_462174, EPI_ISL_462175, EPI_ISL_462176, EPI_ISL_462177, EPI_ISL_462178, EPI_ISL_462179, EPI_ISL_462180, EPI_ISL_462181, EPI_ISL_462182, EPI_ISL_462183, EPI_ISL_462184, EPI_ISL_462185, EPI_ISL_462186, EPI_ISL_462187, EPI_ISL_462188, EPI_ISL_462189, EPI_ISL_462190, EPI_ISL_462191, EPI_ISL_462192, EPI_ISL_462193, EPI_ISL_462194, EPI_ISL_462195, EPI_ISL_462196, EPI_ISL_462197, EPI_ISL_462198, EPI_ISL_462199, EPI_ISL_462200, EPI_ISL_462201, EPI_ISL_462202, EPI_ISL_462203, EPI_ISL_462204, EPI_ISL_462205, EPI_ISL_462206, EPI_ISL_462207, EPI_ISL_462208, EPI_ISL_462209, EPI_ISL_462210, EPI_ISL_462211, EPI_ISL_462212, EPI_ISL_462213, EPI_ISL_462214, EPI_ISL_462215, EPI_ISL_462216, EPI_ISL_462217, EPI_ISL_462218, EPI_ISL_462219, EPI_ISL_462220, EPI_ISL_462221, EPI_ISL_462222, EPI_ISL_462223, EPI_ISL_462224, EPI_ISL_462225, EPI_ISL_462226, EPI_ISL_462227, EPI_ISL_462228, EPI_ISL_462229, EPI_ISL_462230, EPI_ISL_462231, EPI_ISL_462232, EPI_ISL_462233, EPI_ISL_462234, EPI_ISL_462235, EPI_ISL_462236, EPI_ISL_462237, EPI_ISL_462238, EPI_ISL_462239, EPI_ISL_462240, EPI_ISL_462241, EPI_ISL_462242, EPI_ISL_462243, EPI_ISL_462244, EPI_ISL_462245, EPI_ISL_462246, EPI_ISL_462247, EPI_ISL_462248, EPI_ISL_462249, EPI_ISL_462250, EPI_ISL_462251, EPI_ISL_462252, EPI_ISL_462253, EPI_ISL_462254, EPI_ISL_462255, EPI_ISL_462256, EPI_ISL_462257, EPI_ISL_462258, EPI_ISL_462259, EPI_ISL_462260, EPI_ISL_462261, EPI_ISL_462262, EPI_ISL_462263, EPI_ISL_462264, EPI_ISL_462265, EPI_ISL_462266, EPI_ISL_462267, EPI_ISL_462268, EPI_ISL_462269, EPI_ISL_462270, EPI_ISL_462271, EPI_ISL_462272, EPI_ISL_462273, EPI_ISL_462274, EPI_ISL_462275, EPI_ISL_462276, EPI_ISL_462277, EPI_ISL_462278, EPI_ISL_462279, EPI_ISL_462280, EPI_ISL_462281, EPI_ISL_462282, EPI_ISL_462283, EPI_ISL_462284, EPI_ISL_462285, EPI_ISL_462286, EPI_ISL_462287, EPI_ISL_462288, EPI_ISL_462289, EPI_ISL_462290, EPI_ISL_462291, EPI_ISL_462292, EPI_ISL_462293, EPI_ISL_462294, EPI_ISL_462295, EPI_ISL_462296, EPI_ISL_462297, EPI_ISL_462298, EPI_ISL_462299, EPI_ISL_462300, EPI_ISL_462301, EPI_ISL_462302, EPI_ISL_462303, EPI_ISL_462304, EPI_ISL_462305, EPI_ISL_462306, EPI_ISL_462307, EPI_ISL_462308, EPI_ISL_462309, EPI_ISL_462310, EPI_ISL_462311, EPI_ISL_462312, EPI_ISL_462313, EPI_ISL_462314, EPI_ISL_462315, EPI_ISL_462316, EPI_ISL_462317, EPI_ISL_462318, EPI_ISL_462319, EPI_ISL_462320, EPI_ISL_462321, EPI_ISL_462322, EPI_ISL_462323, EPI_ISL_462324, EPI_ISL_462325, EPI_ISL_462326, EPI_ISL_462327, EPI_ISL_462328, EPI_ISL_462329, EPI_ISL_462330, EPI_ISL_462331, EPI_ISL_462332, EPI_ISL_462333, EPI_ISL_462334, EPI_ISL_462335, EPI_ISL_462336, EPI_ISL_462337, EPI_ISL_462338, EPI_ISL_462339, EPI_ISL_462340, EPI_ISL_462341, EPI_ISL_462342, EPI_ISL_462343, EPI_ISL_462344, EPI_ISL_462345, EPI_ISL_462346, EPI_ISL_462347, EPI_ISL_462348, EPI_ISL_462349, EPI_ISL_462350, EPI_ISL_462351, EPI_ISL_462352, EPI_ISL_462353, EPI_ISL_462354, EPI_ISL_462355, EPI_ISL_462356, EPI_ISL_462357, EPI_ISL_462358, EPI_ISL_462359, EPI_ISL_462360, EPI_ISL_462361, EPI_ISL_462362, EPI_ISL_462363, EPI_ISL_462364, EPI_ISL_462365, EPI_ISL_462366, EPI_ISL_462367, EPI_ISL_462368, EPI_ISL_462369, EPI_ISL_462370, EPI_ISL_462371, EPI_ISL_462372, EPI_ISL_462373, EPI_ISL_462374, EPI_ISL_462375, EPI_ISL_462376, EPI_ISL_462377, EPI_ISL_462378, EPI_ISL_462379, EPI_ISL_462380, EPI_ISL_462381, EPI_ISL_462382, EPI_ISL_462383, EPI_ISL_462384, EPI_ISL_462385, EPI_ISL_462386, EPI_ISL_462387, EPI_ISL_462388, EPI_ISL_462389, EPI_ISL_462390, EPI_ISL_462391, EPI_ISL_462392, EPI_ISL_46 |                                                                            |                                                                            |                                                                                                                                                                                                                                                                                                                 |

All Submitters of data may be contacted directly via [www.gisaid.org](http://www.gisaid.org)

Originating

| Accession ID                                                                                                                                                                                                                                                                                                                                                                                                                                                                                                                                                                                                                                                                                                                                                                                                                                                                                                                                                                                                                                                  | Originating Laboratory                                                                           | Submitting Laboratory                                                                            | Authors                                                                                                                                                                                                                                                                                                                                                                                                                                                                                                                                                                                                                                                                                                                                                                                                                                                                                                                                                                                                                                                                                                         |
|---------------------------------------------------------------------------------------------------------------------------------------------------------------------------------------------------------------------------------------------------------------------------------------------------------------------------------------------------------------------------------------------------------------------------------------------------------------------------------------------------------------------------------------------------------------------------------------------------------------------------------------------------------------------------------------------------------------------------------------------------------------------------------------------------------------------------------------------------------------------------------------------------------------------------------------------------------------------------------------------------------------------------------------------------------------|--------------------------------------------------------------------------------------------------|--------------------------------------------------------------------------------------------------|-----------------------------------------------------------------------------------------------------------------------------------------------------------------------------------------------------------------------------------------------------------------------------------------------------------------------------------------------------------------------------------------------------------------------------------------------------------------------------------------------------------------------------------------------------------------------------------------------------------------------------------------------------------------------------------------------------------------------------------------------------------------------------------------------------------------------------------------------------------------------------------------------------------------------------------------------------------------------------------------------------------------------------------------------------------------------------------------------------------------|
| EPI_ISL_4459417                                                                                                                                                                                                                                                                                                                                                                                                                                                                                                                                                                                                                                                                                                                                                                                                                                                                                                                                                                                                                                               | ALABANG MEDICAL CENTER                                                                           | Research Institute for Tropical Medicine/Tohoku University                                       | Allen Anthony Laraño; Ardiane Ysabelle Dolor; Catalino Demetria; Clyde Dapát; Emmanuel Kagning Tsinda; Francisco Gerardo Polotan; Hitoshi Oshitani; Inez Andrea Medado; Jefferson Earl Halog; Lei Lanna Dancel; Lelanie Nacion; Ma. Angelica Tujan; Machiko Okamoto; Maria Carmen Corpuz; Mariko Siato-Obata; Mayuko Saito                                                                                                                                                                                                                                                                                                                                                                                                                                                                                                                                                                                                                                                                                                                                                                                      |
| EPI_ISL_4459353                                                                                                                                                                                                                                                                                                                                                                                                                                                                                                                                                                                                                                                                                                                                                                                                                                                                                                                                                                                                                                               | APACIBLE MEMORIAL DISTRICT HOSPITAL                                                              | Research Institute for Tropical Medicine/Tohoku University                                       | Allen Anthony Laraño; Ardiane Ysabelle Dolor; Catalino Demetria; Clyde Dapát; Emmanuel Kagning Tsinda; Francisco Gerardo Polotan; Hitoshi Oshitani; Inez Andrea Medado; Jefferson Earl Halog; Lei Lanna Dancel; Lelanie Nacion; Ma. Angelica Tujan; Machiko Okamoto; Maria Carmen Corpuz; Mariko Siato-Obata; Mayuko Saito                                                                                                                                                                                                                                                                                                                                                                                                                                                                                                                                                                                                                                                                                                                                                                                      |
| EPI_ISL_2859131, EPI_ISL_2859134, EPI_ISL_2859136, see above                                                                                                                                                                                                                                                                                                                                                                                                                                                                                                                                                                                                                                                                                                                                                                                                                                                                                                                                                                                                  | Adela Serra TV Memorial Center                                                                   | Philippine Genome Center                                                                         | 2859150, EPI_ISL_2859151, EPI_ISL_2859152, EPI_ISL_2859154, EPI_ISL_2859163, EPI_ISL_2859167, EPI_ISL_2859245, EPI_ISL_2859259, EPI_ISL_2859266, EPI_ISL_2859280, EPI_ISL_2859288, EPI_ISL_2859321, EPI_ISL_2859333, EPI_ISL_2859339, EPI_ISL_2859526, EPI_ISL_2859895, EPI_ISL_2859916, EPI_ISL_2859958                                                                                                                                                                                                                                                                                                                                                                                                                                                                                                                                                                                                                                                                                                                                                                                                        |
| EPI_ISL_2153828                                                                                                                                                                                                                                                                                                                                                                                                                                                                                                                                                                                                                                                                                                                                                                                                                                                                                                                                                                                                                                               | Alfonso Rural Health Unit                                                                        | Philippine Genome Center                                                                         | Alethea R. de Guzman; Anna Ong-Lim; Arianne A. Zamora; Asia Louisa U. Chong; Benedict A. Maralit; Candice Francheska B. Tambaoan; Carlo M. Lapid; Celia Carlos; Devon Ray Pacial; Edsel Maurice Salvaña; El King D. Morado; Elcid Aaron R. Pangilinan; Eva Maria Cutiongco-de la Paz; Francis A. Tablizo; Henrietta Marie Rodriguez; Jaime C. Montoya; Jan Michael C. Yap; Jo-Hannah S. Llames; John Q. Wong; Joshua Gregor A. Dizon; Juan Antonio R. Magalang; Karol Sophia Agape R. Padilla; Kenneth M. Kim; Kris P. Punayan; Kristina Patriz Dela Cruz; Lindsay Claire D.L. Carandang; Ma. Exanil Planting; Marc Edsel C. Ayes; Maria Rosario Singh-Vergeire and Cynthia P. Saloma; Maria Sofia L. Yangzon; Marielle M Gamboa; Marissa Alejandria; Nina Francesca Bustamante; Razel Nikka M. Hao; Renato Jacinto Q. Mantaring; Rianna Patricia S. Cruz; Sheila Mae M. Araiza; Yvonne Valerie Austria; Zipporah Mariebelle R. Enriquez; Zryel V. Mollejon                                                                                                                                                     |
| EPI_ISL_410302                                                                                                                                                                                                                                                                                                                                                                                                                                                                                                                                                                                                                                                                                                                                                                                                                                                                                                                                                                                                                                                | Amalea Dulcene Nicolosara Research Institute for Tropical Medicine, Molecular Biology Laboratory | Amalea Dulcene Nicolosara Research Institute for Tropical Medicine, Molecular Biology Laboratory | A.D.; E.S.; F.M.; I.P.; J.G.; K.M.; M.A.; Manalo; Medado; Mercado; Nicolosara; O.T. and Cruz; Onza; Polotan; Tujan                                                                                                                                                                                                                                                                                                                                                                                                                                                                                                                                                                                                                                                                                                                                                                                                                                                                                                                                                                                              |
| EPI_ISL_2188084, EPI_ISL_2188273, EPI_ISL_2188882, see above                                                                                                                                                                                                                                                                                                                                                                                                                                                                                                                                                                                                                                                                                                                                                                                                                                                                                                                                                                                                  | Amang Rodriguez Memorial Medical Center                                                          | Philippine Genome Center                                                                         | Alethea R. de Guzman; Anna Ong-Lim; Arianne A. Zamora; Asia Louisa U. Chong; Benedict A. Maralit; Candice Francheska B. Tambaoan; Carlo M. Lapid; Celia Carlos; Cynthia P. Saloma; Devon Ray Pacial; Diomedes A. Carño; Edsel Maurice Salvaña; Edsel Maurice Salvaña; El King D. Morado; Elcid Aaron R. Pangilinan; Eva Maria Cutiongco-de la Paz; Francis A. Tablizo; Henrietta Marie Rodriguez; Irish Coleen A. Asin; Jaime C. Montoya; Jan Michael C. Yap; Jarvin E. Nipales; Jo-Hannah S. Llames; John Q. Wong; Joshua Gregor A. Dizon; Juan Antonio R. Magalang; Karol Sophia Agape R. Padilla; Kenneth M. Kim; Kris P. Punayan; Kristina Patriz Dela Cruz; Lindsay Clare D.L. Carandang; Ma. Exanil Planting; Marc Edsel C. Ayes; Marc Jeronne R. Castro; Maria Rosario Singh-Vergeire and Cynthia P. Saloma; Maria Sofia L. Yangzon; Marielle M Gamboa; Marissa Alejandria; Nina Francesca Bustamante; Razel Nikka M. Hao; Renato Jacinto Q. Mantaring; Rianna Patricia S. Cruz; Sheila Mae M. Araiza; Shieila Mae M. Araiza; Yvonne Valerie Austria; Zipporah Mariebelle R. Enriquez; Zryel V. Mollejon |
| EPI_ISL_2155067, EPI_ISL_2155087, EPI_ISL_2155090, see above                                                                                                                                                                                                                                                                                                                                                                                                                                                                                                                                                                                                                                                                                                                                                                                                                                                                                                                                                                                                  | Amosup Seamen's Hospital                                                                         | Philippine Genome Center                                                                         | Alethea R. de Guzman; Anna Ong-Lim; Arianne A. Zamora; Asia Louisa U. Chong; Benedict A. Maralit; Candice Francheska B. Tambaoan; Carlo M. Lapid; Celia Carlos; Devon Ray Pacial; Edsel Maurice Salvaña; El King D. Morado; Elcid Aaron R. Pangilinan; Eva Maria Cutiongco-de la Paz; Francis A. Tablizo; Irish Coleen A. Asin; Jaime C. Montoya; Jan Michael C. Yap; Jo-Hannah S. Llames; John Q. Wong; Joshua Gregor A. Dizon; Juan Antonio R. Magalang; Karol Sophia Agape R. Padilla; Kenneth M. Kim; Kris P. Punayan; Marc Edsel C. Ayes; Marc Jeronne R. Castro; Maria Rosario Singh-Vergeire and Cynthia P. Saloma; Maria Sofia L. Yangzon; Marissa Alejandria; Razel Nikka M. Hao; Rianna Patricia S. Cruz; Sheila Mae M. Araiza                                                                                                                                                                                                                                                                                                                                                                        |
| EPI_ISL_2105510, EPI_ISL_2105513, EPI_ISL_2105518, see above                                                                                                                                                                                                                                                                                                                                                                                                                                                                                                                                                                                                                                                                                                                                                                                                                                                                                                                                                                                                  | Army General Hospital Molecular Laboratory                                                       | Philippine Genome Center                                                                         | Alethea R. de Guzman; Anna Ong-Lim; Arianne A. Zamora; Asia Louisa U. Chong; Benedict A. Maralit; Candice Francheska B. Tambaoan; Carlo M. Lapid; Celia Carlos; Devon Ray Pacial; Edsel Maurice Salvaña; El King D. Morado; Eva Maria Cutiongco-de la Paz; Francis A. Tablizo; Irish Coleen A. Asin; Jaime C. Montoya; Jan Michael C. Yap; Jo-Hannah S. Llames; John Q. Wong; Joshua Gregor A. Dizon; Juan Antonio R. Magalang; Karol Sophia Agape R. Padilla; Kenneth M. Kim; Kris P. Punayan; Marc Edsel C. Ayes; Marc Jeronne R. Castro; Maria Rosario Singh-Vergeire and Cynthia P. Saloma; Maria Sofia L. Yangzon; Marissa Alejandria; Razel Nikka M. Hao; Rianna Patricia S. Cruz; Sheila Mae M. Araiza                                                                                                                                                                                                                                                                                                                                                                                                   |
| EPI_ISL_3105864                                                                                                                                                                                                                                                                                                                                                                                                                                                                                                                                                                                                                                                                                                                                                                                                                                                                                                                                                                                                                                               | Asian Hospital and Medical Center                                                                | Research Institute for Tropical Medicine                                                         | Clyde Dapát; Deana Mae Ocampo; Emmanuel Kagning Tsinda; Francisco Gerardo Polotan; Hitoshi Oshitani; Inez Andrea Medado; Jefferson Earl Halog; Joana Ina Manalo; Lei Lanna Dancel; Ma Angelica Tujan; Mariko Saito-Obata; Mayuko Saito; Michiko Okamoto; Samantha Louise Bado                                                                                                                                                                                                                                                                                                                                                                                                                                                                                                                                                                                                                                                                                                                                                                                                                                   |
| EPI_ISL_4459391, EPI_ISL_4459401, EPI_ISL_4459411                                                                                                                                                                                                                                                                                                                                                                                                                                                                                                                                                                                                                                                                                                                                                                                                                                                                                                                                                                                                             | BIÑAN CITY HEALTH OFFICE II                                                                      | Research Institute for Tropical Medicine/Tohoku University                                       | Allen Anthony Laraño; Ardiane Ysabelle Dolor; Catalino Demetria; Clyde Dapát; Emmanuel Kagning Tsinda; Francisco Gerardo Polotan; Hitoshi Oshitani; Inez Andrea Medado; Jefferson Earl Halog; Lei Lanna Dancel; Lelanie Nacion; Ma. Angelica Tujan; Machiko Okamoto; Maria Carmen Corpuz; Mariko Siato-Obata; Mayuko Saito                                                                                                                                                                                                                                                                                                                                                                                                                                                                                                                                                                                                                                                                                                                                                                                      |
| EPI_ISL_4459404, EPI_ISL_4459407                                                                                                                                                                                                                                                                                                                                                                                                                                                                                                                                                                                                                                                                                                                                                                                                                                                                                                                                                                                                                              | BIÑAN DOCTORS' HOSPITAL, INC.                                                                    | Research Institute for Tropical Medicine/Tohoku University                                       | Allen Anthony Laraño; Ardiane Ysabelle Dolor; Catalino Demetria; Clyde Dapát; Emmanuel Kagning Tsinda; Francisco Gerardo Polotan; Hitoshi Oshitani; Inez Andrea Medado; Jefferson Earl Halog; Lei Lanna Dancel; Lelanie Nacion; Ma. Angelica Tujan; Machiko Okamoto; Maria Carmen Corpuz; Mariko Siato-Obata; Mayuko Saito                                                                                                                                                                                                                                                                                                                                                                                                                                                                                                                                                                                                                                                                                                                                                                                      |
| EPI_ISL_2156318, EPI_ISL_2156319                                                                                                                                                                                                                                                                                                                                                                                                                                                                                                                                                                                                                                                                                                                                                                                                                                                                                                                                                                                                                              | BULACAN MEDICAL CENTER                                                                           | Philippine Genome Center                                                                         | Alethea R. de Guzman; Anna Ong-Lim; Arianne A. Zamora; Asia Louisa U. Chong; Benedict A. Maralit; Candice Francheska B. Tambaoan; Carlo M. Lapid; Celia Carlos; Devon Ray Pacial; Edsel Maurice Salvaña; El King D. Morado; Elcid Aaron R. Pangilinan; Eva Maria Cutiongco-de la Paz; Francis A. Tablizo; Irish Coleen A. Asin; Jaime C. Montoya; Jan Michael C. Yap; Jo-Hannah S. Llames; John Q. Wong; Joshua Gregor A. Dizon; Juan Antonio R. Magalang; Karol Sophia Agape R. Padilla; Kenneth M. Kim; Kris P. Punayan; Marc Edsel C. Ayes; Marc Jeronne R. Castro; Maria Rosario Singh-Vergeire and Cynthia P. Saloma; Maria Sofia L. Yangzon; Marissa Alejandria; Razel Nikka M. Hao; Rianna Patricia S. Cruz; Sheila Mae M. Araiza                                                                                                                                                                                                                                                                                                                                                                        |
| EPI_ISL_4459474                                                                                                                                                                                                                                                                                                                                                                                                                                                                                                                                                                                                                                                                                                                                                                                                                                                                                                                                                                                                                                               | BULALACAO MUNICIPAL HEALTH OFFICE                                                                | Research Institute for Tropical Medicine/Tohoku University                                       | Allen Anthony Laraño; Ardiane Ysabelle Dolor; Catalino Demetria; Clyde Dapát; Emmanuel Kagning Tsinda; Francisco Gerardo Polotan; Hitoshi Oshitani; Inez Andrea Medado; Jefferson Earl Halog; Lei Lanna Dancel; Lelanie Nacion; Ma. Angelica Tujan; Machiko Okamoto; Maria Carmen Corpuz; Mariko Siato-Obata; Mayuko Saito                                                                                                                                                                                                                                                                                                                                                                                                                                                                                                                                                                                                                                                                                                                                                                                      |
| EPI_ISL_2155396                                                                                                                                                                                                                                                                                                                                                                                                                                                                                                                                                                                                                                                                                                                                                                                                                                                                                                                                                                                                                                               | Bagong Cainta Municipal Hospital (PGC)                                                           | Philippine Genome Center                                                                         | Alethea R. de Guzman; Anna Ong-Lim; Arianne A. Zamora; Asia Louisa U. Chong; Benedict A. Maralit; Candice Francheska B. Tambaoan; Carlo M. Lapid; Celia Carlos; Devon Ray Pacial; Edsel Maurice Salvaña; El King D. Morado; Eva Maria Cutiongco-de la Paz; Francis A. Tablizo; Irish Coleen A. Asin; Jaime C. Montoya; Jan Michael C. Yap; Jo-Hannah S. Llames; John Q. Wong; Joshua Gregor A. Dizon; Juan Antonio R. Magalang; Karol Sophia Agape R. Padilla; Kenneth M. Kim; Kris P. Punayan; Marc Edsel C. Ayes; Marc Jeronne R. Castro; Maria Rosario Singh-Vergeire and Cynthia P. Saloma; Maria Sofia L. Yangzon; Marissa Alejandria; Razel Nikka M. Hao; Rianna Patricia S. Cruz; Sheila Mae M. Araiza                                                                                                                                                                                                                                                                                                                                                                                                   |
| EPI_ISL_2105283, EPI_ISL_2105284, EPI_ISL_2105421, EPI_ISL_2153910, EPI_ISL_2153911, EPI_ISL_2153912, EPI_ISL_2153913, EPI_ISL_2153919, EPI_ISL_2153921, EPI_ISL_2153922, EPI_ISL_2153923, EPI_ISL_2153924, EPI_ISL_2153925, EPI_ISL_2153926, EPI_ISL_2153927, EPI_ISL_2153928, EPI_ISL_2153929, EPI_ISL_2153930, EPI_ISL_2153931, EPI_ISL_2153932, EPI_ISL_2153933, EPI_ISL_2153934, EPI_ISL_2153935, EPI_ISL_2153936, EPI_ISL_2153937, EPI_ISL_2153938, EPI_ISL_2153939, EPI_ISL_2153940, EPI_ISL_2153941, EPI_ISL_2153942, EPI_ISL_2153943, EPI_ISL_2153944, EPI_ISL_2153945, EPI_ISL_2153946, EPI_ISL_2153947, EPI_ISL_2153948, EPI_ISL_2153949, EPI_ISL_2153950, EPI_ISL_2153951, EPI_ISL_2153952, EPI_ISL_2153953, EPI_ISL_2153954, EPI_ISL_2153955, EPI_ISL_2153956, EPI_ISL_2153957, EPI_ISL_2153958, EPI_ISL_2153959, EPI_ISL_2153960, EPI_ISL_2153961, EPI_ISL_2153962, EPI_ISL_2153963, EPI_ISL_2153964, EPI_ISL_2153965, EPI_ISL_2153966, EPI_ISL_2153967, EPI_ISL_2153968, EPI_ISL_2153969, EPI_ISL_2153970, EPI_ISL_2153971, EPI_ISL_2153972, E |                                                                                                  |                                                                                                  |                                                                                                                                                                                                                                                                                                                                                                                                                                                                                                                                                                                                                                                                                                                                                                                                                                                                                                                                                                                                                                                                                                                 |



|                                                                                                                                                                                                                                                                                                                                                                                                                                                                                                                                                                                                                                                                                                                                                                                                                                                                                                                                                                                                                                                                                              |                                                                     |                                                            |                                                                                                                                                                                                                                                                                                                                                                                                                                                                                                                                                                                                                                                                                                                                                                                                                                                                                                                                                                                                                                                                                                                                               |
|----------------------------------------------------------------------------------------------------------------------------------------------------------------------------------------------------------------------------------------------------------------------------------------------------------------------------------------------------------------------------------------------------------------------------------------------------------------------------------------------------------------------------------------------------------------------------------------------------------------------------------------------------------------------------------------------------------------------------------------------------------------------------------------------------------------------------------------------------------------------------------------------------------------------------------------------------------------------------------------------------------------------------------------------------------------------------------------------|---------------------------------------------------------------------|------------------------------------------------------------|-----------------------------------------------------------------------------------------------------------------------------------------------------------------------------------------------------------------------------------------------------------------------------------------------------------------------------------------------------------------------------------------------------------------------------------------------------------------------------------------------------------------------------------------------------------------------------------------------------------------------------------------------------------------------------------------------------------------------------------------------------------------------------------------------------------------------------------------------------------------------------------------------------------------------------------------------------------------------------------------------------------------------------------------------------------------------------------------------------------------------------------------------|
|                                                                                                                                                                                                                                                                                                                                                                                                                                                                                                                                                                                                                                                                                                                                                                                                                                                                                                                                                                                                                                                                                              | Laboratory                                                          | Center                                                     | Maria Cutiongco-de la Paz; Francis A. Tablizo; Henrietta Marie Rodriguez; Irish Coleen A. Asin; Jaime C. Montoya; Jan Michael C. Yap; Jarvin E. Nipales; Jo-Hannah S. Llamas; John Q. Wong; Joshua Gregor A. Dizon; Juan Antonio R. Magalang; Karol Sophia Agape R. Padilla; Kenneth M. Kim; Kris P. Punayan; Kristina Patriz Dela Cruz; Lindsay Clare D.L. Carandang; Ma. Exanil Plantig; Marc Edsel C. Ayes; Marc Jerrone R. Castro; Maria Rosario Singh-Vergeire and Cynthia P. Saloma; Maria Sofia L. Yangzon; Marielle M. Gamboa; Marissa Alejandria; Niña Francesca Bustamante; Razel Nikka M. Hao; Renato Jacinto Q. Mantaring; Rianna Patricia S. Cruz; Sheila Mae M. Araiza; Shiela Mae M. Araiza; Yvonne Valerie Austria; Zipporah Mariebelle R. Enriquez; Zryel V. Mollejon                                                                                                                                                                                                                                                                                                                                                        |
| EPI_ISL_2105547, EPI_ISL_2156494, EPI_ISL_4714975                                                                                                                                                                                                                                                                                                                                                                                                                                                                                                                                                                                                                                                                                                                                                                                                                                                                                                                                                                                                                                            | Chinese General Hospital                                            | Philippine Genome Center                                   | Alethea R. de Guzman; Anna Ong-Lim; Arianne A. Zamora; Asia Louisa U. Chong; Benedict A. Maralit; Candice Francheska B. Tambaoan; Carlo M. Lapid; Celia Carlos; Cynthia P. Saloma; Devon Ray Pacial; Diomedes A. Carifo; Edsel Maurice Salvaña; Edsel Maurice Salvaña; El King D. Morado; Elcid Aaron R. Panglinan; Eva Maria Cutiongco-de la Paz; Francis A. Tablizo; Henrietta Marie Rodriguez; Irish Coleen A. Asin; Jaime C. Montoya; Jan Michael C. Yap; Jarvin E. Nipales; Jo-Hannah S. Llamas; John Q. Wong; Joshua Gregor A. Dizon; Juan Antonio R. Magalang; Karol Sophia Agape R. Padilla; Kenneth M. Kim; Kris P. Punayan; Kristina Patriz Dela Cruz; Lindsay Claire D.L. Carandang; Ma. Exanil Plantig; Marc Edsel C. Ayes; Marc Jerrone R. Castro; Maria Rosario Singh-Vergeire; Maria Rosario Singh-Vergeire and Cynthia P. Saloma; Maria Sofia L. Yangzon; Marielle M. Gamboa; Marissa Alejandria; Niña Francesca Bustamante; Razel Nikka M. Hao; Renato Jacinto Q. Mantaring; Rianna Patricia S. Cruz; Sheila Mae M. Araiza; Shiela Mae M. Araiza; Yvonne Valerie Austria; Zipporah Mariebelle R. Enriquez; Zryel V. Mollejon |
| EPI_ISL_833337                                                                                                                                                                                                                                                                                                                                                                                                                                                                                                                                                                                                                                                                                                                                                                                                                                                                                                                                                                                                                                                                               | Christ the Saviour General Hospital - Batangas                      | Research Institute for Tropical Medicine                   | Catalino Demetria; Daria Manalo; Edelwisa Mercado; Francisco Gerardo Polotan; Hannah Leah Morito; Inez Andrea Medado; John Leonard Chan; Kirstyn Brunker; Ma Angelica Tujan; Othoniel Jan Onza                                                                                                                                                                                                                                                                                                                                                                                                                                                                                                                                                                                                                                                                                                                                                                                                                                                                                                                                                |
| EPI_ISL_3105871                                                                                                                                                                                                                                                                                                                                                                                                                                                                                                                                                                                                                                                                                                                                                                                                                                                                                                                                                                                                                                                                              | City Health Office - San Juan                                       | Research Institute for Tropical Medicine                   | Clyde Dapatt; Deana Mae Ocampo; Emmanuel Kagning Tsinda; Francisco Gerardo Polotan; Hitoshi Oshitani; Inez Andrea Medado; Jefferson Earl Halog; Joana Ina Manalo; Lei Lanna Dancel; Ma Angelica Tujan; Mariko Saito-Obata; Mayuko Saito; Michiko Okamoto; Samantha Louise Bado                                                                                                                                                                                                                                                                                                                                                                                                                                                                                                                                                                                                                                                                                                                                                                                                                                                                |
| EPI_ISL_2859300                                                                                                                                                                                                                                                                                                                                                                                                                                                                                                                                                                                                                                                                                                                                                                                                                                                                                                                                                                                                                                                                              | Ciudad Medical Zamboanga                                            | Philippine Genome Center                                   | Alethea R. de Guzman; Anna Ong-Lim; Arianne A. Zamora; Benedict A. Maralit; Carlo M. Lapid; Celia Carlos; Devon Ray Pacial; Diomedes A. Carino; Edsel Maurice Salvaña; El King D. Morado; Elcid Aaron R. Panglinan; Eva Maria Cutiongco-de la Paz; Francis A. Tablizo; Henrietta Marie Rodriguez; Irish Coleen A. Asin; Jaime C. Montoya; Jan Michael C. Yap; Jarvin E. Nipales; Jo-Hannah S. Llamas; John Q. Wong; Joshua Gregor A. Dizon; Juan Antonio R. Magalang; Karol Sophia Agape R. Padilla; Kenneth M. Kim; Kris P. Punayan; Kristina Patriz Dela Cruz; Lindsay Claire D.L. Carandang; Ma. Exanil Plantig; Marc Edsel C. Ayes; Marc Jerrone R. Castro; Maria Rosario Singh-Vergeire and Cynthia P. Saloma; Maria Sofia L. Yangzon; Marielle M. Gamboa; Marissa Alejandria; Niña Francesca Bustamante; Razel Nikka M. Hao; Renato Jacinto Q. Mantaring; Rianna Patricia S. Cruz; Sheila Mae M. Araiza; Yvonne Valerie Austria; Zipporah Mariebelle R. Enriquez; Zryel V. Mollejon                                                                                                                                                     |
| EPI_ISL_1213563, EPI_ISL_2105538, EPI_ISL_2105543, EPI_ISL_2156166, EPI_ISL_2156281, EPI_ISL_2156282, EPI_ISL_2156283, EPI_ISL_2156295, EPI_ISL_2156296, EPI_ISL_2156297, EPI_ISL_2156298, EPI_ISL_2156299, EPI_ISL_2156327, EPI_ISL_2171163, EPI_ISL_2171229, EPI_ISL_2188677, EPI_ISL_2188728, EPI_ISL_2188775, EPI_ISL_2189064, EPI_ISL_2189421, EPI_ISL_2189445, EPI_ISL_2859243, EPI_ISL_2859254, EPI_ISL_2859264, EPI_ISL_2859302, EPI_ISL_2859372, EPI_ISL_2862015                                                                                                                                                                                                                                                                                                                                                                                                                                                                                                                                                                                                                    | see above                                                           | Cotabato Regional and Medical Center                       | Alethea R. de Guzman; Anna Ong-Lim; Arianne A. Zamora; Asia Louisa U. Chong; Benedict A. Maralit; Candice Francheska B. Tambaoan; Carlo M. Lapid; Celia Carlos; Devon Ray Pacial; Diomedes A. Carino; Edsel Maurice Salvaña; El King D. Morado; Elcid Aaron R. Panglinan; Eva Maria Cutiongco-de la Paz; Francis A. Tablizo; Henrietta Marie Rodriguez; Irish Coleen A. Asin; Jaime C. Montoya; Jan Michael C. Yap; Jarvin E. Nipales; Jo-Hannah S. Llamas; John Q. Wong; Joshua Gregor A. Dizon; Juan Antonio R. Magalang; Karol Sophia Agape R. Padilla; Kenneth M. Kim; Kris P. Punayan; Kristina Patriz Dela Cruz; Lindsay Claire D.L. Carandang; Ma. Exanil Plantig; Marc Edsel C. Ayes; Marc Jerrone R. Castro; Maria Rosario Singh-Vergeire and Cynthia P. Saloma; Maria Sofia L. Yangzon; Marielle M. Gamboa; Marissa Alejandria; Niña Francesca Bustamante; Razel Nikka M. Hao; Renato Jacinto Q. Mantaring; Rianna Patricia S. Cruz; Sheila Mae M. Araiza; Yvonne Valerie Austria; Zipporah Mariebelle R. Enriquez; Zryel V. Mollejon                                                                                               |
| EPI_ISL_3105882                                                                                                                                                                                                                                                                                                                                                                                                                                                                                                                                                                                                                                                                                                                                                                                                                                                                                                                                                                                                                                                                              | Cruz-Rabe Maternity and General Hospital                            | Research Institute for Tropical Medicine                   | Clyde Dapatt; Deana Mae Ocampo; Emmanuel Kagning Tsinda; Francisco Gerardo Polotan; Hitoshi Oshitani; Inez Andrea Medado; Jefferson Earl Halog; Joana Ina Manalo; Lei Lanna Dancel; Ma Angelica Tujan; Mariko Saito-Obata; Mayuko Saito; Michiko Okamoto; Samantha Louise Bado                                                                                                                                                                                                                                                                                                                                                                                                                                                                                                                                                                                                                                                                                                                                                                                                                                                                |
| EPI_ISL_4459365, EPI_ISL_4459527                                                                                                                                                                                                                                                                                                                                                                                                                                                                                                                                                                                                                                                                                                                                                                                                                                                                                                                                                                                                                                                             | D.T. PROTACIO HOSPITAL                                              | Research Institute for Tropical Medicine/Tohoku University | Allen Anthony Laraño; Ardiane Ysabelle Dolor; Catalino Demetria; Clyde Dapatt; Emmanuel Kagning Tsinda; Francisco Gerardo Polotan; Hitoshi Oshitani; Inez Andrea Medado; Jefferson Earl Halog; Lei Lanna Dancel; Leilanie Nacion; Ma. Angelica Tujan; Machiko Okamoto; Maria Carmen Corpu; Mariko Siato-Obata; Mayuko Saito                                                                                                                                                                                                                                                                                                                                                                                                                                                                                                                                                                                                                                                                                                                                                                                                                   |
| EPI_ISL_1069186                                                                                                                                                                                                                                                                                                                                                                                                                                                                                                                                                                                                                                                                                                                                                                                                                                                                                                                                                                                                                                                                              | D.T. Protacio Hospital                                              | Research Institute for Tropical Medicine                   | Catalino Demetria; Daria Manalo; Edelwisa Mercado; Francisco Gerardo Polotan; Hannah Leah Morito; Inez Andrea Medado; John Leonard Chan; Joseph Hughes; Kirstyn Brunker; Ma Angelica Tujan; Othoniel Jan Onza                                                                                                                                                                                                                                                                                                                                                                                                                                                                                                                                                                                                                                                                                                                                                                                                                                                                                                                                 |
| EPI_ISL_4459296, EPI_ISL_4459299, EPI_ISL_4459303, EPI_ISL_4459359                                                                                                                                                                                                                                                                                                                                                                                                                                                                                                                                                                                                                                                                                                                                                                                                                                                                                                                                                                                                                           | DON BOSCO HEALTH CENTER                                             | Research Institute for Tropical Medicine/Tohoku University | Allen Anthony Laraño; Ardiane Ysabelle Dolor; Catalino Demetria; Clyde Dapatt; Emmanuel Kagning Tsinda; Francisco Gerardo Polotan; Hitoshi Oshitani; Inez Andrea Medado; Jefferson Earl Halog; Lei Lanna Dancel; Leilanie Nacion; Ma. Angelica Tujan; Machiko Okamoto; Maria Carmen Corpu; Mariko Siato-Obata; Mayuko Saito                                                                                                                                                                                                                                                                                                                                                                                                                                                                                                                                                                                                                                                                                                                                                                                                                   |
| EPI_ISL_4459477                                                                                                                                                                                                                                                                                                                                                                                                                                                                                                                                                                                                                                                                                                                                                                                                                                                                                                                                                                                                                                                                              | DOÑA MARTA HEALTH CENTER                                            | Research Institute for Tropical Medicine/Tohoku University | Allen Anthony Laraño; Ardiane Ysabelle Dolor; Catalino Demetria; Clyde Dapatt; Emmanuel Kagning Tsinda; Francisco Gerardo Polotan; Hitoshi Oshitani; Inez Andrea Medado; Jefferson Earl Halog; Lei Lanna Dancel; Leilanie Nacion; Ma. Angelica Tujan; Machiko Okamoto; Maria Carmen Corpu; Mariko Siato-Obata; Mayuko Saito                                                                                                                                                                                                                                                                                                                                                                                                                                                                                                                                                                                                                                                                                                                                                                                                                   |
| EPI_ISL_2156564                                                                                                                                                                                                                                                                                                                                                                                                                                                                                                                                                                                                                                                                                                                                                                                                                                                                                                                                                                                                                                                                              | Daniel O. Mercado Medical Center                                    | Philippine Genome Center                                   | Alethea R. de Guzman; Anna Ong-Lim; Arianne A. Zamora; Asia Louisa U. Chong; Benedict A. Maralit; Candice Francheska B. Tambaoan; Carlo M. Lapid; Celia Carlos; Devon Ray Pacial; Edsel Maurice Salvaña; El King D. Morado; Elcid Aaron R. Panglinan; Eva Maria Cutiongco-de la Paz; Francis A. Tablizo; Irish Coleen A. Asin; Jaime C. Montoya; Jan Michael C. Yap; Jo-Hannah S. Llamas; John Q. Wong; Joshua Gregor A. Dizon; Juan Antonio R. Magalang; Karol Sophia Agape R. Padilla; Kenneth M. Kim; Kris P. Punayan; Marc Edsel C. Ayes; Marc Jerrone R. Castro; Maria Sofia L. Yangzon; Marissa Alejandria; Razel Nikka M. Hao; Rianna Patricia S. Cruz; Sheila Mae M. Araiza                                                                                                                                                                                                                                                                                                                                                                                                                                                           |
| EPI_ISL_1081828, EPI_ISL_1081840                                                                                                                                                                                                                                                                                                                                                                                                                                                                                                                                                                                                                                                                                                                                                                                                                                                                                                                                                                                                                                                             | Davao One World                                                     | Philippine Genome Center                                   | Alethea R. de Guzman; Anna Ong-Lim; Arianne A. Zamora; Asia Louisa U. Chong; Benedict A. Maralit; Candice Francheska B. Tambaoan; Carlo M. Lapid; Celia Carlos; Cynthia P. Saloma; Devon Ray Pacial; Edsel Maurice Salvaña; El King D. Morado; Eva Maria Cutiongco-de la Paz; Francis A. Tablizo; Irish Coleen A. Asin; Jaime C. Montoya; Jan Michael C. Yap; Jo-Hannah S. Llamas; John Q. Wong; Joshua Gregor A. Dizon; Juan Antonio R. Magalang; Karol Sophia Agape R. Padilla; Kenneth M. Kim; Kris P. Punayan; Marc Edsel C. Ayes; Marc Jerrone R. Castro; Maria Sofia L. Yangzon; Marissa Alejandria; Razel Nikka M. Hao; Rianna Patricia S. Cruz; Sheila Mae M. Araiza; and Maria Rosario Singh-Vergeire                                                                                                                                                                                                                                                                                                                                                                                                                                |
| EPI_ISL_2105288, EPI_ISL_2105311, EPI_ISL_2105313, EPI_ISL_2105318, EPI_ISL_2105326, EPI_ISL_2105328, EPI_ISL_2105331, EPI_ISL_2105339, EPI_ISL_2105352, EPI_ISL_2105361, EPI_ISL_2105395, EPI_ISL_2105396, EPI_ISL_2105397, EPI_ISL_2105429, EPI_ISL_2105440, EPI_ISL_2105455, EPI_ISL_2105530, EPI_ISL_2105533, EPI_ISL_2105545, EPI_ISL_2155224, EPI_ISL_2155641, EPI_ISL_2155642, EPI_ISL_2155643, EPI_ISL_2156371, EPI_ISL_2156403, EPI_ISL_2156405, EPI_ISL_2156406, EPI_ISL_2156419, EPI_ISL_2156498, EPI_ISL_2156499, EPI_ISL_2156507, EPI_ISL_2156508, EPI_ISL_4712015, EPI_ISL_4712023, EPI_ISL_4712031, EPI_ISL_4712068, EPI_ISL_4712077, EPI_ISL_4712165, EPI_ISL_4712183                                                                                                                                                                                                                                                                                                                                                                                                        | see above                                                           | Davao One World Diagnostic Center Incorporated             | Alethea R. de Guzman; Anna Ong-Lim; Arianne A. Zamora; Asia Louisa U. Chong; Benedict A. Maralit; Candice Francheska B. Tambaoan; Carlo M. Lapid; Celia Carlos; Cynthia P. Saloma; Devon Ray Pacial; Diomedes A. Carifo; Edsel Maurice Salvaña; Edsel Maurice Salvaña; El King D. Morado; Elcid Aaron R. Panglinan; Eva Maria Cutiongco-de la Paz; Francis A. Tablizo; Henrietta Marie Rodriguez; Irish Coleen A. Asin; Jaime C. Montoya; Jan Michael C. Yap; Jarvin E. Nipales; Jo-Hannah S. Llamas; John Q. Wong; Joshua Gregor A. Dizon; Juan Antonio R. Magalang; Karol Sophia Agape R. Padilla; Kenneth M. Kim; Kris P. Punayan; Kristina Patriz Dela Cruz; Lindsay Claire D.L. Carandang; Ma. Exanil Plantig; Marc Edsel C. Ayes; Marc Jerrone R. Castro; Maria Rosario Singh-Vergeire; Maria Rosario Singh-Vergeire and Cynthia P. Saloma; Maria Sofia L. Yangzon; Marielle M. Gamboa; Marissa Alejandria; Niña Francesca Bustamante; Razel Nikka M. Hao; Renato Jacinto Q. Mantaring; Rianna Patricia S. Cruz; Sheila Mae M. Araiza; Yvonne Valerie Austria; Zipporah Mariebelle R. Enriquez; Zryel V. Mollejon                       |
| EPI_ISL_4630042, EPI_ISL_4712045, EPI_ISL_4712050, EPI_ISL_4712089, EPI_ISL_4712115, EPI_ISL_4712156, EPI_ISL_4712175, EPI_ISL_4712436, EPI_ISL_4712514, EPI_ISL_4712922, EPI_ISL_4712929, EPI_ISL_4712953, EPI_ISL_4713002, EPI_ISL_4713056, EPI_ISL_4713115, EPI_ISL_4713185, EPI_ISL_4713302, EPI_ISL_4713358, EPI_ISL_4713411, EPI_ISL_4713472, EPI_ISL_4713495, EPI_ISL_4713571, EPI_ISL_4713588, EPI_ISL_4713607, EPI_ISL_4713631, EPI_ISL_4713813, EPI_ISL_4713928, EPI_ISL_4713942, EPI_ISL_4713972, EPI_ISL_4714008, EPI_ISL_4714091, EPI_ISL_4714172, EPI_ISL_4714185, EPI_ISL_4714288, EPI_ISL_4714295, EPI_ISL_4714477, EPI_ISL_4714478, EPI_ISL_4714499, EPI_ISL_4714553, EPI_ISL_4714572, EPI_ISL_4714609, EPI_ISL_4714633, EPI_ISL_4714693, EPI_ISL_4714716, EPI_ISL_4714745, EPI_ISL_4714757, EPI_ISL_4714810, EPI_ISL_4714840, EPI_ISL_4714896, EPI_ISL_4714918, EPI_ISL_4714991, EPI_ISL_4715039, EPI_ISL_4715098, EPI_ISL_4715102, EPI_ISL_4715150, EPI_ISL_4715154, EPI_ISL_4715188, EPI_ISL_4715262, EPI_ISL_4715289, EPI_ISL_4715295, EPI_ISL_4715300, EPI_ISL_4715543 | see above                                                           | Davao Regional Medical Center                              | Alethea R. de Guzman; Alyssa Joyce E. Telles; Anna Ong-Lim; Arianne A. Zamora; Benedict A. Maralit; Carlo M. Lapid; Celia Carlos; Cynthia P. Saloma; Devon Ray Pacial; Diomedes A. Carifo; Edsel Maurice Salvaña; El King D. Morado; Elcid Aaron R. Panglinan; Eva Maria Cutiongco-de la Paz; Francis A. Tablizo; Henrietta Marie Rodriguez; Jaime C. Montoya; Jan Michael C. Yap; Jarvin E. Nipales; Jo-Hannah S. Llamas; John Michael Egan; John Q. Wong; Joshua Gregor A. Dizon; Joshua Jose Endozo; Juan Antonio R. Magalang; Karol Sophia Agape R. Padilla; Kenneth M. Kim; Kris P. Punayan; Kristina Patriz Dela Cruz; Lindsay Clare D.L. Carandang; Ma. Exanil Plantig; Marc Edsel C. Ayes; Maria Rosario Singh-Vergeire; Maria Sofia L. Yangzon; Marielle M. Gamboa; Marissa Alejandria; Niña Francesca Bustamante; Razel Nikka M. Hao; Renato Jacinto Q. Mantaring; Rianna Patricia S. Cruz; Sheila Mae M. Araiza; Yvonne Valerie Austria; Zipporah Mariebelle R. Enriquez; Zryel V. Mollejon                                                                                                                                        |
| EPI_ISL_2859231, EPI_ISL_2860186, EPI_ISL_2860190, EPI_ISL_2860192                                                                                                                                                                                                                                                                                                                                                                                                                                                                                                                                                                                                                                                                                                                                                                                                                                                                                                                                                                                                                           | Democrito O. Plaza Memorial Hospital                                | Philippine Genome Center                                   | Alethea R. de Guzman; Anna Ong-Lim; Arianne A. Zamora; Benedict A. Maralit; Carlo M. Lapid; Celia Carlos; Devon Ray Pacial; Diomedes A. Carino; Edsel Maurice Salvaña; El King D. Morado; Elcid Aaron R. Panglinan; Eva Maria Cutiongco-de la Paz; Francis A. Tablizo; Henrietta Marie Rodriguez; Jaime C. Montoya; Jan Michael C. Yap; Jarvin E. Nipales; Jo-Hannah S. Llamas; John Q. Wong; Joshua Gregor A. Dizon; Juan Antonio R. Magalang; Karol Sophia Agape R. Padilla; Kenneth M. Kim; Kris P. Punayan; Kristina Patriz Dela Cruz; Lindsay Claire D.L. Carandang; Ma. Exanil Plantig; Marc Edsel C. Ayes; Marc Jerrone R. Castro; Maria Sofia L. Yangzon; Marissa Alejandria; Razel Nikka M. Hao; Renato Jacinto Q. Mantaring; Rianna Patricia S. Cruz; Sheila Mae M. Araiza; Yvonne Valerie Austria; Zipporah Mariebelle R. Enriquez; Zryel V. Mollejon                                                                                                                                                                                                                                                                              |
| EPI_ISL_1081796                                                                                                                                                                                                                                                                                                                                                                                                                                                                                                                                                                                                                                                                                                                                                                                                                                                                                                                                                                                                                                                                              | Detoxicare                                                          | Philippine Genome Center                                   | Alethea R. de Guzman; Anna Ong-Lim; Arianne A. Zamora; Asia Louisa U. Chong; Benedict A. Maralit; Candice Francheska B. Tambaoan; Carlo M. Lapid; Celia Carlos; Cynthia P. Saloma; Devon Ray Pacial; Edsel Maurice Salvaña; El King D. Morado; Eva Maria Cutiongco-de la Paz; Francis A. Tablizo; Irish Coleen A. Asin; Jaime C. Montoya; Jan Michael C. Yap; Jo-Hannah S. Llamas; John Q. Wong; Joshua Gregor A. Dizon; Juan Antonio R. Magalang; Karol Sophia Agape R. Padilla; Kenneth M. Kim; Kris P. Punayan; Marc Edsel C. Ayes; Marc Jerrone R. Castro; Maria Sofia L. Yangzon; Marissa Alejandria; Razel Nikka M. Hao; Rianna Patricia S. Cruz; Sheila Mae M. Araiza; and Maria Rosario Singh-Vergeire                                                                                                                                                                                                                                                                                                                                                                                                                                |
| EPI_ISL_2105252, EPI_ISL_2154442, EPI_ISL_2154468, EPI_ISL_2154480, EPI_ISL_2154558, EPI_ISL_2154612, EPI_ISL_2154698, EPI_ISL_2154700, EPI_ISL_2154806, EPI_ISL_2154872, EPI_ISL_2154891, EPI_ISL_2154894, EPI_ISL_2156113, EPI_ISL_2156114, EPI_ISL_2156115, EPI_ISL_2156500, EPI_ISL_2188698, EPI_ISL_2188729, EPI_ISL_2188778, EPI_ISL_2188822, EPI_ISL_2188838, EPI_ISL_2860252, EPI_ISL_4713435                                                                                                                                                                                                                                                                                                                                                                                                                                                                                                                                                                                                                                                                                        | see above                                                           | Detoxicare Molecular Diagnostics Laboratory                | Alethea R. de Guzman; Anna Ong-Lim; Arianne A. Zamora; Asia Louisa U. Chong; Benedict A. Maralit; Candice Francheska B. Tambaoan; Carlo M. Lapid; Celia Carlos; Cynthia P. Saloma; Devon Ray Pacial; Diomedes A. Carino; Diomedes A. Carifo; Edsel Maurice Salvaña; Edsel Maurice Salvaña; El King D. Morado; Elcid Aaron R. Panglinan; Eva Maria Cutiongco-de la Paz; Francis A. Tablizo; Henrietta Marie Rodriguez; Irish Coleen A. Asin; Jaime C. Montoya; Jan Michael C. Yap; Jarvin E. Nipales; Jo-Hannah S. Llamas; John Q. Wong; Joshua Gregor A. Dizon; Juan Antonio R. Magalang; Karol Sophia Agape R. Padilla; Kenneth M. Kim; Kris P. Punayan; Kristina Patriz Dela Cruz; Lindsay Claire D.L. Carandang; Ma. Exanil Plantig; Marc Edsel C. Ayes; Marc Jerrone R. Castro; Maria Rosario Singh-Vergeire; Maria Rosario Singh-Vergeire and Cynthia P. Saloma; Maria Sofia L. Yangzon; Marielle M. Gamboa; Marissa Alejandria; Niña Francesca Bustamante; Razel Nikka M. Hao; Renato Jacinto Q. Mantaring; Rianna Patricia S. Cruz; Sheila Mae M. Araiza; Yvonne Valerie Austria; Zipporah Mariebelle R. Enriquez; Zryel V. Mollejon   |
| EPI_ISL_2859225                                                                                                                                                                                                                                                                                                                                                                                                                                                                                                                                                                                                                                                                                                                                                                                                                                                                                                                                                                                                                                                                              | Divine Word Hospital Virology Laboratory                            | Philippine Genome Center                                   | Alethea R. de Guzman; Anna Ong-Lim; Arianne A. Zamora; Benedict A. Maralit; Carlo M. Lapid; Celia Carlos; Devon Ray Pacial; Diomedes A. Carino; Edsel Maurice Salvaña; El King D. Morado; Elcid Aaron R. Panglinan; Eva Maria Cutiongco-de la Paz; Francis A. Tablizo; Henrietta Marie Rodriguez; Jaime C. Montoya; Jan Michael C. Yap; Jarvin E. Nipales; Jo-Hannah S. Llamas; John Q. Wong; Joshua Gregor A. Dizon; Juan Antonio R. Magalang; Karol Sophia Agape R. Padilla; Kenneth M. Kim; Kris P. Punayan; Kristina Patriz Dela Cruz; Lindsay Claire D.L. Carandang; Ma. Exanil Plantig; Marc Edsel C. Ayes; Maria Rosario Singh-Vergeire and Cynthia P. Saloma; Maria Sofia L. Yangzon; Marielle M. Gamboa; Marissa Alejandria; Niña Francesca Bustamante; Razel Nikka M. Hao; Renato Jacinto Q. Mantaring; Rianna Patricia S. Cruz; Sheila Mae M. Araiza; Yvonne Valerie Austria; Zipporah Mariebelle R. Enriquez; Zryel V. Mollejon                                                                                                                                                                                                   |
| EPI_ISL_2189042                                                                                                                                                                                                                                                                                                                                                                                                                                                                                                                                                                                                                                                                                                                                                                                                                                                                                                                                                                                                                                                                              | Dr. Arturo Pingoy Medical Center                                    | Philippine Genome Center                                   | Alethea R. de Guzman; Anna Ong-Lim; Arianne A. Zamora; Asia Louisa U. Chong; Benedict A. Maralit; Candice Francheska B. Tambaoan; Carlo M. Lapid; Celia Carlos; Devon Ray Pacial; Edsel Maurice Salvaña; El King D. Morado; Elcid Aaron R. Panglinan; Eva Maria Cutiongco-de la Paz; Francis A. Tablizo; Irish Coleen A. Asin; Jaime C. Montoya; Jan Michael C. Yap; Jo-Hannah S. Llamas; John Q. Wong; Joshua Gregor A. Dizon; Juan Antonio R. Magalang; Karol Sophia Agape R. Padilla; Kenneth M. Kim; Kris P. Punayan; Marc Edsel C. Ayes; Maria Rosario Singh-Vergeire and Cynthia P. Saloma; Maria Sofia L. Yangzon; Marissa Alejandria; Razel Nikka M. Hao; Renato Jacinto Q. Mantaring; Rianna Patricia S. Cruz; Sheila Mae M. Araiza                                                                                                                                                                                                                                                                                                                                                                                                  |
| EPI_ISL_2105306, EPI_ISL_2105360, EPI_ISL_2105365, EPI_ISL_2105433, EPI_ISL_2105541, EPI_ISL_2154027, EPI_ISL_2156167, EPI_ISL_2156168, EPI_ISL_2156169, EPI_ISL_2188121, EPI_ISL_2188278, EPI_ISL_2188921, EPI_ISL_2189291, EPI_ISL_2189420, EPI_ISL_4712334                                                                                                                                                                                                                                                                                                                                                                                                                                                                                                                                                                                                                                                                                                                                                                                                                                | see above                                                           | Dr. Jorge P. Royeca Hospital                               | Alethea R. de Guzman; Anna Ong-Lim; Arianne A. Zamora; Asia Louisa U. Chong; Benedict A. Maralit; Candice Francheska B. Tambaoan; Carlo M. Lapid; Celia Carlos; Cynthia P. Saloma; Devon Ray Pacial; Diomedes A. Carifo; Edsel Maurice Salvaña; Edsel Maurice Salvaña; El King D. Morado; Elcid Aaron R. Panglinan; Eva Maria Cutiongco-de la Paz; Francis A. Tablizo; Henrietta Marie Rodriguez; Irish Coleen A. Asin; Jaime C. Montoya; Jan Michael C. Yap; Jarvin E. Nipales; Jo-Hannah S. Llamas; John Q. Wong; Joshua Gregor A. Dizon; Juan Antonio R. Magalang; Karol Sophia Agape R. Padilla; Kenneth M. Kim; Kris P. Punayan; Kristina Patriz Dela Cruz; Lindsay Claire D.L. Carandang; Ma. Exanil Plantig; Marc Edsel C. Ayes; Marc Jerrone R. Castro; Maria Rosario Singh-Vergeire; Maria Rosario Singh-Vergeire and Cynthia P. Saloma; Maria Sofia L. Yangzon; Marielle M. Gamboa; Marissa Alejandria; Niña Francesca Bustamante; Razel Nikka M. Hao; Renato Jacinto Q. Mantaring; Rianna Patricia S. Cruz; Sheila Mae M. Araiza; Yvonne Valerie Austria; Zipporah Mariebelle R. Enriquez; Zryel V. Mollejon                       |
| EPI_ISL_3105876                                                                                                                                                                                                                                                                                                                                                                                                                                                                                                                                                                                                                                                                                                                                                                                                                                                                                                                                                                                                                                                                              | Dr. Jose P. Rizal Memorial District Hospital                        | Research Institute for Tropical Medicine                   | Clyde Dapatt; Deana Mae Ocampo; Emmanuel Kagning Tsinda; Francisco Gerardo Polotan; Hitoshi Oshitani; Inez Andrea Medado; Jefferson Earl Halog; Joana Ina Manalo; Lei Lanna Dancel; Ma Angelica Tujan; Mariko Saito-Obata; Mayuko Saito; Michiko Okamoto; Samantha Louise Bado                                                                                                                                                                                                                                                                                                                                                                                                                                                                                                                                                                                                                                                                                                                                                                                                                                                                |
| EPI_ISL_4716619, EPI_ISL_4716876, EPI_ISL_4717420, EPI_ISL_4717439                                                                                                                                                                                                                                                                                                                                                                                                                                                                                                                                                                                                                                                                                                                                                                                                                                                                                                                                                                                                                           | Dr. Rafael S. Tumbokon Memorial Hospital                            | Philippine Genome Center                                   | Alethea R. de Guzman; Anna Ong-Lim; Arianne A. Zamora; Benedict A. Maralit; Carlo M. Lapid; Celia Carlos; Cynthia P. Saloma; Devon Ray Pacial; Diomedes A. Carifo; Edsel Maurice Salvaña; El King D. Morado; Elcid Aaron R. Panglinan; Eva Maria Cutiongco-de la Paz; Francis A. Tablizo; Henrietta Marie Rodriguez; Jaime C. Montoya; Jan Michael C. Yap; Jarvin E. Nipales; Jo-Hannah S. Llamas; John Q. Wong; Joshua Gregor A. Dizon; Juan Antonio R. Magalang; Karol Sophia Agape R. Padilla; Kenneth M. Kim; Kris P. Punayan; Kristina Patriz Dela Cruz; Lindsay Claire D.L. Carandang; Ma. Exanil Plantig; Marc Edsel C. Ayes; Maria Rosario Singh-Vergeire; Maria Sofia L. Yangzon; Marielle M. Gamboa; Marissa Alejandria; Niña Francesca Bustamante; Razel Nikka M. Hao; Renato Jacinto Q. Mantaring; Rianna Patricia S. Cruz; Sheila Mae M. Araiza; Yvonne Valerie Austria; Zipporah Mariebelle R. Enriquez; Zryel V. Mollejon                                                                                                                                                                                                      |
| EPI_ISL_2859168, EPI_ISL_2859229, EPI_ISL_2859247, EPI_ISL_2859373, EPI_ISL_2859374, EPI_ISL_2859375, EPI_ISL_2859376, EPI_ISL_2859378, EPI_ISL_2859379                                                                                                                                                                                                                                                                                                                                                                                                                                                                                                                                                                                                                                                                                                                                                                                                                                                                                                                                      | see above                                                           | Eastern Visayas Regional Covid-19 Testing Center           | Alethea R. de Guzman; Anna Ong-Lim; Arianne A. Zamora; Benedict A. Maralit; Carlo M. Lapid; Celia Carlos; Devon Ray Pacial; Diomedes A. Carino; Edsel Maurice Salvaña; El King D. Morado; Elcid Aaron R. Panglinan; Eva Maria Cutiongco-de la Paz; Francis A. Tablizo; Henrietta Marie Rodriguez; Jaime C. Montoya; Jan Michael C. Yap; Jarvin E. Nipales; Jo-Hannah S. Llamas; John Q. Wong; Joshua Gregor A. Dizon; Juan Antonio R. Magalang; Karol Sophia Agape R. Padilla; Kenneth M. Kim; Kris P. Punayan; Kristina Patriz Dela Cruz; Lindsay Claire D.L. Carandang; Ma. Exanil Plantig; Marc Edsel C. Ayes; Maria Rosario Singh-Vergeire and Cynthia P. Saloma; Maria Sofia L. Yangzon; Marielle M. Gamboa; Marissa Alejandria; Niña Francesca Bustamante; Razel Nikka M. Hao; Renato Jacinto Q. Mantaring; Rianna Patricia S. Cruz; Sheila Mae M. Araiza; Yvonne Valerie Austria; Zipporah Mariebelle R. Enriquez; Zryel V. Mollejon                                                                                                                                                                                                   |
| EPI_ISL_2155605                                                                                                                                                                                                                                                                                                                                                                                                                                                                                                                                                                                                                                                                                                                                                                                                                                                                                                                                                                                                                                                                              | F.Y. Manalo Medical Foundation Inc.- New Era General Hospital (PGC) | Philippine Genome Center                                   | Alethea R. de Guzman; Anna Ong-Lim; Arianne A. Zamora; Asia Louisa U. Chong; Benedict A. Maralit; Candice Francheska B. Tambaoan; Carlo M. Lapid; Celia Carlos; Devon Ray Pacial; Edsel Maurice Salvaña; El King D. Morado; Elcid Aaron R. Panglinan; Eva Maria Cutiongco-de la Paz; Francis A. Tablizo; Irish Coleen A. Asin; Jaime C. Montoya; Jan Michael C. Yap; Jo-Hannah S. Llamas; John Q. Wong; Joshua Gregor A. Dizon; Juan Antonio R. Magalang; Karol Sophia Agape R. Padilla; Kenneth M. Kim; Kris P. Punayan; Marc Edsel C. Ayes; Marc Jerrone R. Castro; Maria Rosario Singh-Vergeire and Cynthia P. Saloma; Maria Sofia L. Yangzon; Marissa Alejandria; Razel Nikka M. Hao; Rianna Patricia S. Cruz; Sheila Mae M. Araiza                                                                                                                                                                                                                                                                                                                                                                                                       |
| EPI_ISL_4459531                                                                                                                                                                                                                                                                                                                                                                                                                                                                                                                                                                                                                                                                                                                                                                                                                                                                                                                                                                                                                                                                              | FOUNDATION OF OUR LADY OF PEACE                                     | Research Institute for Tropical Medicine                   | Allen Anthony Laraño; Ardiane Ysabelle Dolor; Catalino Demetria; Clyde Dapatt; Emmanuel Kagning Tsinda; Francisco Gerardo Polotan; Hitoshi Oshitani; Inez Andrea Medado; Jefferson Earl Halog; Lei Lanna Dancel; Leilanie Nacion; Ma. Angelica Tujan; Machiko Okamoto; Maria Carmen Corpu; Mariko Siato-Obata; Mayuko Saito                                                                                                                                                                                                                                                                                                                                                                                                                                                                                                                                                                                                                                                                                                                                                                                                                   |

|                                                                                                                                                                                                                                                                                                                                                                                                                                                                                                                                                                                                                                                                                                                                                                                                                                                                                                                                                                                                                                                                                                                                                                                                                                                                                                                                                                                               |                                                                                          |                                                                                                                                                                                                                                                                                                                                                                                                                                                                                                                                                                                                                                                                                                                                                                                                                                                                                                                                                                                                                                                                                                                                                                                                                                          |                                                                                                                                                                                                                                                                                                                                                                                                                                                                                                                                                                                                                                                                                                                                                                                                                                                                                                                                                                                                                                                                                                                                                                                                        |
|-----------------------------------------------------------------------------------------------------------------------------------------------------------------------------------------------------------------------------------------------------------------------------------------------------------------------------------------------------------------------------------------------------------------------------------------------------------------------------------------------------------------------------------------------------------------------------------------------------------------------------------------------------------------------------------------------------------------------------------------------------------------------------------------------------------------------------------------------------------------------------------------------------------------------------------------------------------------------------------------------------------------------------------------------------------------------------------------------------------------------------------------------------------------------------------------------------------------------------------------------------------------------------------------------------------------------------------------------------------------------------------------------|------------------------------------------------------------------------------------------|------------------------------------------------------------------------------------------------------------------------------------------------------------------------------------------------------------------------------------------------------------------------------------------------------------------------------------------------------------------------------------------------------------------------------------------------------------------------------------------------------------------------------------------------------------------------------------------------------------------------------------------------------------------------------------------------------------------------------------------------------------------------------------------------------------------------------------------------------------------------------------------------------------------------------------------------------------------------------------------------------------------------------------------------------------------------------------------------------------------------------------------------------------------------------------------------------------------------------------------|--------------------------------------------------------------------------------------------------------------------------------------------------------------------------------------------------------------------------------------------------------------------------------------------------------------------------------------------------------------------------------------------------------------------------------------------------------------------------------------------------------------------------------------------------------------------------------------------------------------------------------------------------------------------------------------------------------------------------------------------------------------------------------------------------------------------------------------------------------------------------------------------------------------------------------------------------------------------------------------------------------------------------------------------------------------------------------------------------------------------------------------------------------------------------------------------------------|
|                                                                                                                                                                                                                                                                                                                                                                                                                                                                                                                                                                                                                                                                                                                                                                                                                                                                                                                                                                                                                                                                                                                                                                                                                                                                                                                                                                                               | MISSION, INC.-OUR LADY OF PEACE HOSPITAL                                                 | Medicine/Tohoku University                                                                                                                                                                                                                                                                                                                                                                                                                                                                                                                                                                                                                                                                                                                                                                                                                                                                                                                                                                                                                                                                                                                                                                                                               |                                                                                                                                                                                                                                                                                                                                                                                                                                                                                                                                                                                                                                                                                                                                                                                                                                                                                                                                                                                                                                                                                                                                                                                                        |
| EPI_ISL_2155412, EPI_ISL_2155413, EPI_ISL_2155414                                                                                                                                                                                                                                                                                                                                                                                                                                                                                                                                                                                                                                                                                                                                                                                                                                                                                                                                                                                                                                                                                                                                                                                                                                                                                                                                             | Fatima University Medical Center Antipolo Corp.                                          | Philippine Genome Center                                                                                                                                                                                                                                                                                                                                                                                                                                                                                                                                                                                                                                                                                                                                                                                                                                                                                                                                                                                                                                                                                                                                                                                                                 | Alethea R. de Guzman; Anna Ong-Lim; Arianne A. Zamora; Asia Louisa U. Chong; Benedict A. Maralit; Candice Francheska B. Tambaoan; Carlo M. Lapid; Celia Carlos; Devon Ray Pacial; Edsel Maurice Salvaña; El King D. Morado; Eva Maria Cutiongco-de la Paz; Francis A. Tablizo; Irish Coleen A. Asin; Jaime C. Montoya; Jan Michael C. Yap; Jo-Hannah S. Llames; John Q. Wong; Joshua Gregor A. Dizon; Juan Antonio R. Magalang; Karol Sophia Agape R. Padilla; Kenneth M. Kim; Kris P. Punayan; Marc Edsel C. Ayes; Marc Jerrone R. Castro; Maria Rosario Singh-Vergeire and Cynthia P. Saloma; Maria Sofia L. Yangzon; Marissa Alejandria; Razel Nikka M. Hao; Rianna Patricia S. Cruz; Sheila Mae M. Araiza                                                                                                                                                                                                                                                                                                                                                                                                                                                                                          |
| EPI_ISL_1069189                                                                                                                                                                                                                                                                                                                                                                                                                                                                                                                                                                                                                                                                                                                                                                                                                                                                                                                                                                                                                                                                                                                                                                                                                                                                                                                                                                               | Filinvest Tent Covid Quarantine Facility                                                 | Research Institute for Tropical Medicine                                                                                                                                                                                                                                                                                                                                                                                                                                                                                                                                                                                                                                                                                                                                                                                                                                                                                                                                                                                                                                                                                                                                                                                                 | Catalino Demetria; Daria Manalo; Edelwisa Mercado; Francisco Gerardo Polotan; Hannah Leah Morito; Inez Andrea Medado; John Leonard Chan; Joseph Hughes; Kirstyn Brunker; Ma Angelica Tujan; Othoniel Jan Onza                                                                                                                                                                                                                                                                                                                                                                                                                                                                                                                                                                                                                                                                                                                                                                                                                                                                                                                                                                                          |
| EPI_ISL_1081812, EPI_ISL_2105393, EPI_ISL_2105553, EPI_ISL_2154421, EPI_ISL_2154458, EPI_ISL_2154554, EPI_ISL_2154907, EPI_ISL_2155007, EPI_ISL_2155066, EPI_ISL_2155078, EPI_ISL_2155756, EPI_ISL_2155757, EPI_ISL_2155758, EPI_ISL_2155759, EPI_ISL_2156221, EPI_ISL_2156222, EPI_ISL_2156293, EPI_ISL_2156322, EPI_ISL_2156335, EPI_ISL_2156336, EPI_ISL_2156401, EPI_ISL_2156458, EPI_ISL_2156483, EPI_ISL_2171137, EPI_ISL_2188684, EPI_ISL_2188704, EPI_ISL_2188761, EPI_ISL_2188769, EPI_ISL_2188772, EPI_ISL_2188779, EPI_ISL_2188852, EPI_ISL_2189057, EPI_ISL_2189065, EPI_ISL_2189174, EPI_ISL_2189206, EPI_ISL_2189284, EPI_ISL_2189303, EPI_ISL_2189348, EPI_ISL_2189369, EPI_ISL_2189399, EPI_ISL_2189460, EPI_ISL_2558053, EPI_ISL_2558057, EPI_ISL_2859502, EPI_ISL_2859513, EPI_ISL_2859531, EPI_ISL_2859561, EPI_ISL_2859587, EPI_ISL_2859625, EPI_ISL_2859628, EPI_ISL_2859629, EPI_ISL_2859628, EPI_ISL_2859720, EPI_ISL_2859970, EPI_ISL_2859979, EPI_ISL_2860007, EPI_ISL_2860098, EPI_ISL_2860138, EPI_ISL_2860146, EPI_ISL_2860150, EPI_ISL_2860182, EPI_ISL_2860187, EPI_ISL_2860193, EPI_ISL_2860195, EPI_ISL_2860198, EPI_ISL_2860199, EPI_ISL_2860200, EPI_ISL_2860204, EPI_ISL_2860213, EPI_ISL_2860217, EPI_ISL_2860228, EPI_ISL_2860230, EPI_ISL_2860231, EPI_ISL_2860232, EPI_ISL_2860233, EPI_ISL_2860234, EPI_ISL_2860235, EPI_ISL_2860237, EPI_ISL_4717388 | Philippine Genome Center                                                                 | Alethea R. de Guzman; Anna Ong-Lim; Arianne A. Zamora; Asia Louisa U. Chong; Benedict A. Maralit; Candice Francheska B. Tambaoan; Carlo M. Lapid; Celia Carlos; Cynthia P. Saloma; Devon Ray Pacial; Diomedes A. Carino; Diomedes A. Carriño; Edsel Maurice Salvana; Edsel Maurice Salvaña; El King D. Morado; Elcid Aaron R. Pangilinan; Eva Maria Cutiongco-de la Paz; Francis A. Tablizo; Henrietta Marie Rodriguez; Irish Coleen A. Asin; Jaime C. Montoya; Jan Michael C. Yap; Jarvin E. Nipales; Jo-Hannah S. Llames; John Q. Wong; Joshua Gregor A. Dizon; Juan Antonio R. Magalang; Karol Sophia Agape R. Padilla; Kenneth M. Kim; Kris P. Punayan; Kristina Patriz Dela Cruz; Kristina Patriz Dela Cruz; Lindsay Claire D.L. Carandang; Lindsay Claire D.L. Carandang; Ma. Exanili Planting; Marc Edsel C. Ayes; Marc Jerrone R. Castro; Maria Rosario Singh-Vergeire and Cynthia P. Saloma; Maria Sofia L. Yangzon; Marielle M. Gamboa; Marissa Alejandria; Nina Francesca Bustamante; Niña Francesca Bustamante; Razel Nikka M. Hao; Renato Jacinto Q. Mantaring; Rianna Patricia S. Cruz; Sheila Mae M. Araiza; Yvonne Valerie Austria; Zipporah Mariebelle R. Enriquez; Zyrel V. Mollejon; and Maria Rosario Singh-Vergeire |                                                                                                                                                                                                                                                                                                                                                                                                                                                                                                                                                                                                                                                                                                                                                                                                                                                                                                                                                                                                                                                                                                                                                                                                        |
| EPI_ISL_2105466, EPI_ISL_2105471, EPI_ISL_2105473, EPI_ISL_2105481, EPI_ISL_2105482, EPI_ISL_2105483, EPI_ISL_2105484, EPI_ISL_2105488, EPI_ISL_2105490, EPI_ISL_2105497, EPI_ISL_2105502, EPI_ISL_2105504, EPI_ISL_2105523, EPI_ISL_2105555, EPI_ISL_2155973, EPI_ISL_2155974, EPI_ISL_2155975, EPI_ISL_2155976, EPI_ISL_2156184                                                                                                                                                                                                                                                                                                                                                                                                                                                                                                                                                                                                                                                                                                                                                                                                                                                                                                                                                                                                                                                             | First Aide Diagnostic Center                                                             | Philippine Genome Center                                                                                                                                                                                                                                                                                                                                                                                                                                                                                                                                                                                                                                                                                                                                                                                                                                                                                                                                                                                                                                                                                                                                                                                                                 | Alethea R. de Guzman; Anna Ong-Lim; Arianne A. Zamora; Asia Louisa U. Chong; Benedict A. Maralit; Candice Francheska B. Tambaoan; Carlo M. Lapid; Celia Carlos; Devon Ray Pacial; Edsel Maurice Salvaña; El King D. Morado; Eva Maria Cutiongco-de la Paz; Francis A. Tablizo; Irish Coleen A. Asin; Jaime C. Montoya; Jan Michael C. Yap; Jo-Hannah S. Llames; John Q. Wong; Joshua Gregor A. Dizon; Juan Antonio R. Magalang; Karol Sophia Agape R. Padilla; Kenneth M. Kim; Kris P. Punayan; Marc Edsel C. Ayes; Marc Jerrone R. Castro; Maria Rosario Singh-Vergeire and Cynthia P. Saloma; Maria Sofia L. Yangzon; Marissa Alejandria; Razel Nikka M. Hao; Rianna Patricia S. Cruz; Sheila Mae M. Araiza                                                                                                                                                                                                                                                                                                                                                                                                                                                                                          |
| EPI_ISL_2156188, EPI_ISL_2156189, EPI_ISL_2156567                                                                                                                                                                                                                                                                                                                                                                                                                                                                                                                                                                                                                                                                                                                                                                                                                                                                                                                                                                                                                                                                                                                                                                                                                                                                                                                                             | Graman Medical & Maternity Hospital Inc Molecular Laboratory                             | Philippine Genome Center                                                                                                                                                                                                                                                                                                                                                                                                                                                                                                                                                                                                                                                                                                                                                                                                                                                                                                                                                                                                                                                                                                                                                                                                                 | Alethea R. de Guzman; Anna Ong-Lim; Arianne A. Zamora; Asia Louisa U. Chong; Benedict A. Maralit; Candice Francheska B. Tambaoan; Carlo M. Lapid; Celia Carlos; Devon Ray Pacial; Edsel Maurice Salvaña; El King D. Morado; Elcid Aaron R. Pangilinan; Eva Maria Cutiongco-de la Paz; Francis A. Tablizo; Irish Coleen A. Asin; Jaime C. Montoya; Jan Michael C. Yap; Jo-Hannah S. Llames; John Q. Wong; Joshua Gregor A. Dizon; Juan Antonio R. Magalang; Karol Sophia Agape R. Padilla; Kenneth M. Kim; Kris P. Punayan; Marc Edsel C. Ayes; Marc Jerrone R. Castro; Maria Rosario Singh-Vergeire and Cynthia P. Saloma; Maria Sofia L. Yangzon; Marissa Alejandria; Razel Nikka M. Hao; Rianna Patricia S. Cruz; Sheila Mae M. Araiza                                                                                                                                                                                                                                                                                                                                                                                                                                                               |
| EPI_ISL_4459326, EPI_ISL_4459350, EPI_ISL_4459397, EPI_ISL_4459420, EPI_ISL_4459468                                                                                                                                                                                                                                                                                                                                                                                                                                                                                                                                                                                                                                                                                                                                                                                                                                                                                                                                                                                                                                                                                                                                                                                                                                                                                                           | H.M. CORACHEA GENERAL HOSPITAL                                                           | Research Institute for Tropical Medicine/Tohoku University                                                                                                                                                                                                                                                                                                                                                                                                                                                                                                                                                                                                                                                                                                                                                                                                                                                                                                                                                                                                                                                                                                                                                                               | Allen Anthony Laraño; Ardiane Ysabelle Dolor; Catalino Demetria; Clyde Dapát; Emmanuel Kagning Tsinda; Francisco Gerardo Polotan; Hitoshi Oshitani; Inez Andrea Medado; Jefferson Earl Halog; Lei Lanna Dancel; Leilanie Nacion; Ma. Angelica Tujan; Machiko Okamoto; Maria Carmen Corpuz; Mariko Siato-Obata; Mayuko Saito                                                                                                                                                                                                                                                                                                                                                                                                                                                                                                                                                                                                                                                                                                                                                                                                                                                                            |
| EPI_ISL_1069185                                                                                                                                                                                                                                                                                                                                                                                                                                                                                                                                                                                                                                                                                                                                                                                                                                                                                                                                                                                                                                                                                                                                                                                                                                                                                                                                                                               | H.M. Corachea General Hospital                                                           | Research Institute for Tropical Medicine                                                                                                                                                                                                                                                                                                                                                                                                                                                                                                                                                                                                                                                                                                                                                                                                                                                                                                                                                                                                                                                                                                                                                                                                 | Catalino Demetria; Daria Manalo; Edelwisa Mercado; Francisco Gerardo Polotan; Hannah Leah Morito; Inez Andrea Medado; John Leonard Chan; Joseph Hughes; Kirstyn Brunker; Ma Angelica Tujan; Othoniel Jan Onza                                                                                                                                                                                                                                                                                                                                                                                                                                                                                                                                                                                                                                                                                                                                                                                                                                                                                                                                                                                          |
| EPI_ISL_2154406, EPI_ISL_2154457, EPI_ISL_2154483, EPI_ISL_2154571, EPI_ISL_2154702, EPI_ISL_2154755, EPI_ISL_2154793, EPI_ISL_2154816, EPI_ISL_2154817, EPI_ISL_2154830                                                                                                                                                                                                                                                                                                                                                                                                                                                                                                                                                                                                                                                                                                                                                                                                                                                                                                                                                                                                                                                                                                                                                                                                                      | Health Delivery Systems, Inc.                                                            | Philippine Genome Center                                                                                                                                                                                                                                                                                                                                                                                                                                                                                                                                                                                                                                                                                                                                                                                                                                                                                                                                                                                                                                                                                                                                                                                                                 | Alethea R. de Guzman; Anna Ong-Lim; Arianne A. Zamora; Asia Louisa U. Chong; Benedict A. Maralit; Candice Francheska B. Tambaoan; Carlo M. Lapid; Celia Carlos; Devon Ray Pacial; Edsel Maurice Salvaña; El King D. Morado; Eva Maria Cutiongco-de la Paz; Francis A. Tablizo; Irish Coleen A. Asin; Jaime C. Montoya; Jan Michael C. Yap; Jo-Hannah S. Llames; John Q. Wong; Joshua Gregor A. Dizon; Juan Antonio R. Magalang; Karol Sophia Agape R. Padilla; Kenneth M. Kim; Kris P. Punayan; Marc Edsel C. Ayes; Marc Jerrone R. Castro; Maria Rosario Singh-Vergeire and Cynthia P. Saloma; Maria Sofia L. Yangzon; Marissa Alejandria; Razel Nikka M. Hao; Rianna Patricia S. Cruz; Sheila Mae M. Araiza                                                                                                                                                                                                                                                                                                                                                                                                                                                                                          |
| EPI_ISL_2155845, EPI_ISL_2155846, EPI_ISL_2155848, EPI_ISL_2155849, EPI_ISL_2156291                                                                                                                                                                                                                                                                                                                                                                                                                                                                                                                                                                                                                                                                                                                                                                                                                                                                                                                                                                                                                                                                                                                                                                                                                                                                                                           | Hi-Precision Diagnostic Center                                                           | Philippine Genome Center                                                                                                                                                                                                                                                                                                                                                                                                                                                                                                                                                                                                                                                                                                                                                                                                                                                                                                                                                                                                                                                                                                                                                                                                                 | Alethea R. de Guzman; Anna Ong-Lim; Arianne A. Zamora; Asia Louisa U. Chong; Benedict A. Maralit; Candice Francheska B. Tambaoan; Carlo M. Lapid; Celia Carlos; Devon Ray Pacial; Edsel Maurice Salvaña; El King D. Morado; Elcid Aaron R. Pangilinan; Eva Maria Cutiongco-de la Paz; Francis A. Tablizo; Irish Coleen A. Asin; Jaime C. Montoya; Jan Michael C. Yap; Jo-Hannah S. Llames; John Q. Wong; Joshua Gregor A. Dizon; Juan Antonio R. Magalang; Karol Sophia Agape R. Padilla; Kenneth M. Kim; Kris P. Punayan; Marc Edsel C. Ayes; Marc Jerrone R. Castro; Maria Rosario Singh-Vergeire and Cynthia P. Saloma; Maria Sofia L. Yangzon; Marissa Alejandria; Razel Nikka M. Hao; Rianna Patricia S. Cruz; Sheila Mae M. Araiza                                                                                                                                                                                                                                                                                                                                                                                                                                                               |
| EPI_ISL_1213565, EPI_ISL_1213566, EPI_ISL_2091459, EPI_ISL_2155184, EPI_ISL_2155215, EPI_ISL_2155461, EPI_ISL_2155462, EPI_ISL_2155463, EPI_ISL_2155464, EPI_ISL_2155465, EPI_ISL_2155466, EPI_ISL_2155467, EPI_ISL_2155468, EPI_ISL_2155469, EPI_ISL_2155470, EPI_ISL_2155471, EPI_ISL_2155472, EPI_ISL_2155473, EPI_ISL_2155474, EPI_ISL_2155475, EPI_ISL_2155476, EPI_ISL_2156116, EPI_ISL_2156410, EPI_ISL_2156411, EPI_ISL_2156478, EPI_ISL_2188929, EPI_ISL_2188972, EPI_ISL_2189008, EPI_ISL_2189103, EPI_ISL_2189171, EPI_ISL_2189523, EPI_ISL_2859981, EPI_ISL_2860008, EPI_ISL_2860028, EPI_ISL_2860105, EPI_ISL_2860164, EPI_ISL_4713560, EPI_ISL_4713618, EPI_ISL_4716336, EPI_ISL_4716525                                                                                                                                                                                                                                                                                                                                                                                                                                                                                                                                                                                                                                                                                        | Hi-Precision Diagnostic Center (QC)                                                      | Philippine Genome Center                                                                                                                                                                                                                                                                                                                                                                                                                                                                                                                                                                                                                                                                                                                                                                                                                                                                                                                                                                                                                                                                                                                                                                                                                 | Alethea R. de Guzman; Anna Ong-Lim; Arianne A. Zamora; Asia Louisa U. Chong; Benedict A. Maralit; Candice Francheska B. Tambaoan; Carlo M. Lapid; Celia Carlos; Cynthia P. Saloma; Devon Ray Pacial; Diomedes A. Carino; Diomedes A. Carriño; Edsel Maurice Salvana; Edsel Maurice Salvaña; El King D. Morado; Elcid Aaron R. Pangilinan; Eva Maria Cutiongco-de la Paz; Francis A. Tablizo; Henrietta Marie Rodriguez; Irish Coleen A. Asin; Jaime C. Montoya; Jan Michael C. Yap; Jarvin E. Nipales; Jo-Hannah S. Llames; John Q. Wong; Joshua Gregor A. Dizon; Juan Antonio R. Magalang; Karol Sophia Agape R. Padilla; Kenneth M. Kim; Kris P. Punayan; Kristina Patriz Dela Cruz; Kristina Patriz Dela Cruz; Lindsay Claire D.L. Carandang; Lindsay Claire D.L. Carandang; Ma. Exanili Planting; Marc Edsel C. Ayes; Marc Jerrone R. Castro; Maria Rosario Singh-Vergeire and Cynthia P. Saloma; Maria Sofia L. Yangzon; Marielle M. Gamboa; Marissa Alejandria; Nina Francesca Bustamante; Niña Francesca Bustamante; Razel Nikka M. Hao; Renato Jacinto Q. Mantaring; Rianna Patricia S. Cruz; Sheila Mae M. Araiza; Yvonne Valerie Austria; Zipporah Mariebelle R. Enriquez; Zyrel V. Mollejon |
| EPI_ISL_1122457                                                                                                                                                                                                                                                                                                                                                                                                                                                                                                                                                                                                                                                                                                                                                                                                                                                                                                                                                                                                                                                                                                                                                                                                                                                                                                                                                                               | Hi-Precision Diagnostics                                                                 | Philippine Genome Center                                                                                                                                                                                                                                                                                                                                                                                                                                                                                                                                                                                                                                                                                                                                                                                                                                                                                                                                                                                                                                                                                                                                                                                                                 | Alethea R. de Guzman; Anna Ong-Lim; Arianne A. Zamora; Asia Louisa U. Chong; Benedict A. Maralit; Candice Francheska B. Tambaoan; Carlo M. Lapid; Celia Carlos; Devon Ray Pacial; Edsel Maurice Salvaña; El King D. Morado; Eva Maria Cutiongco-de la Paz; Francis A. Tablizo; Irish Coleen A. Asin; Jaime C. Montoya; Jan Michael C. Yap; Jo-Hannah S. Llames; John Q. Wong; Joshua Gregor A. Dizon; Juan Antonio R. Magalang; Karol Sophia Agape R. Padilla; Kenneth M. Kim; Kris P. Punayan; Marc Edsel C. Ayes; Marc Jerrone R. Castro; Maria Rosario Singh-Vergeire and Cynthia P. Saloma; Maria Sofia L. Yangzon; Marissa Alejandria; Razel Nikka M. Hao; Rianna Patricia S. Cruz; Sheila Mae M. Araiza                                                                                                                                                                                                                                                                                                                                                                                                                                                                                          |
| EPI_ISL_2105506, EPI_ISL_2105508, EPI_ISL_2189410, EPI_ISL_2859581, EPI_ISL_2859738, EPI_ISL_2859789, EPI_ISL_2859892, EPI_ISL_2860027, EPI_ISL_2860061, EPI_ISL_2860067, EPI_ISL_2860133                                                                                                                                                                                                                                                                                                                                                                                                                                                                                                                                                                                                                                                                                                                                                                                                                                                                                                                                                                                                                                                                                                                                                                                                     | IOM- Manila Health Centre Laboratory                                                     | Philippine Genome Center                                                                                                                                                                                                                                                                                                                                                                                                                                                                                                                                                                                                                                                                                                                                                                                                                                                                                                                                                                                                                                                                                                                                                                                                                 | Alethea R. de Guzman; Anna Ong-Lim; Arianne A. Zamora; Asia Louisa U. Chong; Benedict A. Maralit; Candice Francheska B. Tambaoan; Carlo M. Lapid; Celia Carlos; Devon Ray Pacial; Diomedes A. Carino; Edsel Maurice Salvaña; El King D. Morado; Elcid Aaron R. Pangilinan; Eva Maria Cutiongco-de la Paz; Francis A. Tablizo; Henrietta Marie Rodriguez; Irish Coleen A. Asin; Jaime C. Montoya; Jan Michael C. Yap; Jarvin E. Nipales; Jo-Hannah S. Llames; John Q. Wong; Joshua Gregor A. Dizon; Juan Antonio R. Magalang; Karol Sophia Agape R. Padilla; Kenneth M. Kim; Kris P. Punayan; Kristina Patriz Dela Cruz; Lindsay Claire D.L. Carandang; Ma. Exanili Planting; Marc Edsel C. Ayes; Marc Jerrone R. Castro; Maria Rosario Singh-Vergeire and Cynthia P. Saloma; Maria Sofia L. Yangzon; Marielle M. Gamboa; Marissa Alejandria; Nina Francesca Bustamante; Razel Nikka M. Hao; Renato Jacinto Q. Mantaring; Rianna Patricia S. Cruz; Sheila Mae M. Araiza; Yvonne Valerie Austria; Zipporah Mariebelle R. Enriquez; Zyrel V. Mollejon                                                                                                                                                     |
| EPI_ISL_2155001, EPI_ISL_2155323, EPI_ISL_2155644, EPI_ISL_2155645, EPI_ISL_2155646, EPI_ISL_2155647, EPI_ISL_2155648, EPI_ISL_2155649, EPI_ISL_2155650, EPI_ISL_2155651, EPI_ISL_2155652, EPI_ISL_2155653, EPI_ISL_2155654, EPI_ISL_2155655, EPI_ISL_2156190, EPI_ISL_2156191, EPI_ISL_2156192, EPI_ISL_2156193, EPI_ISL_2156194, EPI_ISL_2156195, EPI_ISL_2156196, EPI_ISL_2188177, EPI_ISL_2188239, EPI_ISL_2188745, EPI_ISL_4713882, EPI_ISL_4715880, EPI_ISL_4715899, EPI_ISL_4715986, EPI_ISL_4716224, EPI_ISL_4716258, EPI_ISL_4716331, EPI_ISL_4716613, EPI_ISL_4716980                                                                                                                                                                                                                                                                                                                                                                                                                                                                                                                                                                                                                                                                                                                                                                                                               | Ilocos Training and Regional Medical Center                                              | Philippine Genome Center                                                                                                                                                                                                                                                                                                                                                                                                                                                                                                                                                                                                                                                                                                                                                                                                                                                                                                                                                                                                                                                                                                                                                                                                                 | Alethea R. de Guzman; Anna Ong-Lim; Arianne A. Zamora; Asia Louisa U. Chong; Benedict A. Maralit; Candice Francheska B. Tambaoan; Carlo M. Lapid; Celia Carlos; Cynthia P. Saloma; Devon Ray Pacial; Diomedes A. Carriño; Edsel Maurice Salvana; Edsel Maurice Salvaña; El King D. Morado; Elcid Aaron R. Pangilinan; Eva Maria Cutiongco-de la Paz; Francis A. Tablizo; Henrietta Marie Rodriguez; Irish Coleen A. Asin; Jaime C. Montoya; Jan Michael C. Yap; Jarvin E. Nipales; Jo-Hannah S. Llames; John Q. Wong; Joshua Gregor A. Dizon; Juan Antonio R. Magalang; Karol Sophia Agape R. Padilla; Kenneth M. Kim; Kris P. Punayan; Kristina Patriz Dela Cruz; Lindsay Claire D.L. Carandang; Ma. Exanili Planting; Marc Edsel C. Ayes; Marc Jerrone R. Castro; Maria Rosario Singh-Vergeire and Cynthia P. Saloma; Maria Sofia L. Yangzon; Marielle M. Gamboa; Marissa Alejandria; Niña Francesca Bustamante; Razel Nikka M. Hao; Renato Jacinto Q. Mantaring; Rianna Patricia S. Cruz; Sheila Mae M. Araiza; Yvonne Valerie Austria; Zipporah Mariebelle R. Enriquez; Zyrel V. Mollejon                                                                                                          |
| EPI_ISL_634976                                                                                                                                                                                                                                                                                                                                                                                                                                                                                                                                                                                                                                                                                                                                                                                                                                                                                                                                                                                                                                                                                                                                                                                                                                                                                                                                                                                | Institute of Molecular Biology and Biotechnology, National Institutes of Health          | Institute of Molecular Biology and Biotechnology, National Institutes of Health                                                                                                                                                                                                                                                                                                                                                                                                                                                                                                                                                                                                                                                                                                                                                                                                                                                                                                                                                                                                                                                                                                                                                          | Arevalo, G.; Dunga; E.M.; N.T. and Salvana; Schwem, B.                                                                                                                                                                                                                                                                                                                                                                                                                                                                                                                                                                                                                                                                                                                                                                                                                                                                                                                                                                                                                                                                                                                                                 |
| EPI_ISL_4459456                                                                                                                                                                                                                                                                                                                                                                                                                                                                                                                                                                                                                                                                                                                                                                                                                                                                                                                                                                                                                                                                                                                                                                                                                                                                                                                                                                               | JABEZ MEDICAL CENTER                                                                     | Research Institute for Tropical Medicine/Tohoku University                                                                                                                                                                                                                                                                                                                                                                                                                                                                                                                                                                                                                                                                                                                                                                                                                                                                                                                                                                                                                                                                                                                                                                               | Allen Anthony Laraño; Ardiane Ysabelle Dolor; Catalino Demetria; Clyde Dapát; Emmanuel Kagning Tsinda; Francisco Gerardo Polotan; Hitoshi Oshitani; Inez Andrea Medado; Jefferson Earl Halog; Lei Lanna Dancel; Leilanie Nacion; Ma. Angelica Tujan; Machiko Okamoto; Maria Carmen Corpuz; Mariko Siato-Obata; Mayuko Saito                                                                                                                                                                                                                                                                                                                                                                                                                                                                                                                                                                                                                                                                                                                                                                                                                                                                            |
| EPI_ISL_3105867                                                                                                                                                                                                                                                                                                                                                                                                                                                                                                                                                                                                                                                                                                                                                                                                                                                                                                                                                                                                                                                                                                                                                                                                                                                                                                                                                                               | Jecsons Medical Center                                                                   | Research Institute for Tropical Medicine                                                                                                                                                                                                                                                                                                                                                                                                                                                                                                                                                                                                                                                                                                                                                                                                                                                                                                                                                                                                                                                                                                                                                                                                 | Clyde Dapát; Deana Mae Ocampo; Emmanuel Kagning Tsinda; Francisco Gerardo Polotan; Hitoshi Oshitani; Inez Andrea Medado; Jefferson Earl Halog; Joana Ina Manalo; Lei Lanna Dancel; Ma Angelica Tujan; Mariko Saito-Obata; Mayuko Saito; Michiko Okamoto; Samantha Louise Bado                                                                                                                                                                                                                                                                                                                                                                                                                                                                                                                                                                                                                                                                                                                                                                                                                                                                                                                          |
| EPI_ISL_410314, EPI_ISL_410344, EPI_ISL_410345                                                                                                                                                                                                                                                                                                                                                                                                                                                                                                                                                                                                                                                                                                                                                                                                                                                                                                                                                                                                                                                                                                                                                                                                                                                                                                                                                | Joanna Ina Manalo Research Institute for Tropical Medicine, Molecular Biology Laboratory | Joanna Ina Manalo Research Institute for Tropical Medicine, Molecular Biology Laboratory                                                                                                                                                                                                                                                                                                                                                                                                                                                                                                                                                                                                                                                                                                                                                                                                                                                                                                                                                                                                                                                                                                                                                 | A.D.; Cruz; E.S.; F.M.; I.P.; J.I.; J.I. and Nicolasora; K.M. and Polotan; M.A.; Manalo; Medado; Mercado; Nicolasora; O.T.; Onza; Tujan                                                                                                                                                                                                                                                                                                                                                                                                                                                                                                                                                                                                                                                                                                                                                                                                                                                                                                                                                                                                                                                                |
| EPI_ISL_2188983, EPI_ISL_2189465, EPI_ISL_4713689                                                                                                                                                                                                                                                                                                                                                                                                                                                                                                                                                                                                                                                                                                                                                                                                                                                                                                                                                                                                                                                                                                                                                                                                                                                                                                                                             | Jose B. Lingad Memorial General Hospital                                                 | Philippine Genome Center                                                                                                                                                                                                                                                                                                                                                                                                                                                                                                                                                                                                                                                                                                                                                                                                                                                                                                                                                                                                                                                                                                                                                                                                                 | Alethea R. de Guzman; Anna Ong-Lim; Arianne A. Zamora; Asia Louisa U. Chong; Benedict A. Maralit; Candice Francheska B. Tambaoan; Carlo M. Lapid; Celia Carlos; Cynthia P. Saloma; Devon Ray Pacial; Diomedes A. Carriño; Edsel Maurice Salvana; Edsel Maurice Salvaña; El King D. Morado; Elcid Aaron R. Pangilinan; Eva Maria Cutiongco-de la Paz; Francis A. Tablizo; Henrietta Marie Rodriguez; Irish Coleen A. Asin; Jaime C. Montoya; Jan Michael C. Yap; Jarvin E. Nipales; Jo-Hannah S. Llames; John Q. Wong; Joshua Gregor A. Dizon; Juan Antonio R. Magalang; Karol Sophia Agape R. Padilla; Kenneth M. Kim; Kris P. Punayan; Kristina Patriz Dela Cruz; Lindsay Clare D.L. Carandang; Ma. Exanili Planting; Marc Edsel C. Ayes; Maria Rosario Singh-Vergeire; Maria Rosario Singh-Vergeire and Cynthia P. Saloma; Maria Sofia L. Yangzon; Marielle M. Gamboa; Marissa Alejandria; Niña Francesca Bustamante; Razel Nikka M. Hao; Renato Jacinto Q. Mantaring; Rianna Patricia S. Cruz; Sheila Mae M. Araiza; Yvonne Valerie Austria; Zipporah Mariebelle R. Enriquez; Zyrel V. Mollejon                                                                                                     |
| EPI_ISL_4714031, EPI_ISL_4714666, EPI_ISL_4715057, EPI_ISL_4715171                                                                                                                                                                                                                                                                                                                                                                                                                                                                                                                                                                                                                                                                                                                                                                                                                                                                                                                                                                                                                                                                                                                                                                                                                                                                                                                            | Kairos Diagnostics Laboratory                                                            | Philippine Genome Center                                                                                                                                                                                                                                                                                                                                                                                                                                                                                                                                                                                                                                                                                                                                                                                                                                                                                                                                                                                                                                                                                                                                                                                                                 | Alethea R. de Guzman; Anna Ong-Lim; Arianne A. Zamora; Benedict A. Maralit; Carlo M. Lapid; Celia Carlos; Cynthia P. Saloma; Devon Ray Pacial; Diomedes A. Carriño; Edsel Maurice Salvana; El King D. Morado; Elcid Aaron R. Pangilinan; Eva Maria Cutiongco-de la Paz; Francis A. Tablizo; Henrietta Marie Rodriguez; Jaime C. Montoya; Jan Michael C. Yap; Jarvin E. Nipales; Jo-Hannah S. Llames; John Q. Wong; Joshua Gregor A. Dizon; Juan Antonio R. Magalang; Karol Sophia Agape R. Padilla; Kenneth M. Kim; Kris P. Punayan; Kristina Patriz Dela Cruz; Lindsay Claire D.L. Carandang; Ma. Exanili Planting; Marc Edsel C. Ayes; Maria Rosario Singh-Vergeire; and Cynthia P. Saloma; Maria Sofia L. Yangzon; Marielle M. Gamboa; Marissa Alejandria; Niña Francesca Bustamante; Razel Nikka M. Hao; Renato Jacinto Q. Mantaring; Rianna Patricia S. Cruz; Sheila Mae M. Araiza; Yvonne Valerie Austria; Zipporah Mariebelle R. Enriquez; Zyrel V. Mollejon                                                                                                                                                                                                                                    |
| EPI_ISL_4459525                                                                                                                                                                                                                                                                                                                                                                                                                                                                                                                                                                                                                                                                                                                                                                                                                                                                                                                                                                                                                                                                                                                                                                                                                                                                                                                                                                               | LEVERIZA HEALTH CENTER                                                                   | Research Institute for Tropical Medicine/Tohoku University                                                                                                                                                                                                                                                                                                                                                                                                                                                                                                                                                                                                                                                                                                                                                                                                                                                                                                                                                                                                                                                                                                                                                                               | Allen Anthony Laraño; Ardiane Ysabelle Dolor; Catalino Demetria; Clyde Dapát; Emmanuel Kagning Tsinda; Francisco Gerardo Polotan; Hitoshi Oshitani; Inez Andrea Medado; Jefferson Earl Halog; Lei Lanna Dancel; Leilanie Nacion; Ma. Angelica Tujan; Machiko Okamoto; Maria Carmen Corpuz; Mariko Siato-Obata; Mayuko Saito                                                                                                                                                                                                                                                                                                                                                                                                                                                                                                                                                                                                                                                                                                                                                                                                                                                                            |
| EPI_ISL_4459387                                                                                                                                                                                                                                                                                                                                                                                                                                                                                                                                                                                                                                                                                                                                                                                                                                                                                                                                                                                                                                                                                                                                                                                                                                                                                                                                                                               | LOBO MUNICIPAL HEALTH OFFICE                                                             | Research Institute for Tropical Medicine/Tohoku University                                                                                                                                                                                                                                                                                                                                                                                                                                                                                                                                                                                                                                                                                                                                                                                                                                                                                                                                                                                                                                                                                                                                                                               | Allen Anthony Laraño; Ardiane Ysabelle Dolor; Catalino Demetria; Clyde Dapát; Emmanuel Kagning Tsinda; Francisco Gerardo Polotan; Hitoshi Oshitani; Inez Andrea Medado; Jefferson Earl Halog; Lei Lanna Dancel; Leilanie Nacion; Ma. Angelica Tujan; Machiko Okamoto; Maria Carmen Corpuz; Mariko Siato-Obata; Mayuko Saito                                                                                                                                                                                                                                                                                                                                                                                                                                                                                                                                                                                                                                                                                                                                                                                                                                                                            |
| EPI_ISL_4459362                                                                                                                                                                                                                                                                                                                                                                                                                                                                                                                                                                                                                                                                                                                                                                                                                                                                                                                                                                                                                                                                                                                                                                                                                                                                                                                                                                               | LUMBAN RURAL HEALTH UNIT                                                                 | Research Institute for Tropical Medicine/Tohoku University                                                                                                                                                                                                                                                                                                                                                                                                                                                                                                                                                                                                                                                                                                                                                                                                                                                                                                                                                                                                                                                                                                                                                                               | Allen Anthony Laraño; Ardiane Ysabelle Dolor; Catalino Demetria; Clyde Dapát; Emmanuel Kagning Tsinda; Francisco Gerardo Polotan; Hitoshi Oshitani; Inez Andrea Medado; Jefferson Earl Halog; Lei Lanna Dancel; Leilanie Nacion; Ma. Angelica Tujan; Machiko Okamoto; Maria Carmen Corpuz; Mariko Siato-Obata; Mayuko Saito                                                                                                                                                                                                                                                                                                                                                                                                                                                                                                                                                                                                                                                                                                                                                                                                                                                                            |
| EPI_ISL_3105875                                                                                                                                                                                                                                                                                                                                                                                                                                                                                                                                                                                                                                                                                                                                                                                                                                                                                                                                                                                                                                                                                                                                                                                                                                                                                                                                                                               | La Huerta Health Center                                                                  | Research Institute for Tropical Medicine                                                                                                                                                                                                                                                                                                                                                                                                                                                                                                                                                                                                                                                                                                                                                                                                                                                                                                                                                                                                                                                                                                                                                                                                 | Clyde Dapát; Deana Mae Ocampo; Emmanuel Kagning Tsinda; Francisco Gerardo Polotan; Hitoshi Oshitani; Inez Andrea Medado; Jefferson Earl Halog; Joana Ina Manalo; Lei Lanna Dancel; Ma Angelica Tujan; Mariko Saito-Obata; Mayuko Saito; Michiko Okamoto; Samantha Louise Bado                                                                                                                                                                                                                                                                                                                                                                                                                                                                                                                                                                                                                                                                                                                                                                                                                                                                                                                          |
| EPI_ISL_2155729, EPI_ISL_2155730                                                                                                                                                                                                                                                                                                                                                                                                                                                                                                                                                                                                                                                                                                                                                                                                                                                                                                                                                                                                                                                                                                                                                                                                                                                                                                                                                              | Laguna Holy Family Hospital, Inc.                                                        | Philippine Genome Center                                                                                                                                                                                                                                                                                                                                                                                                                                                                                                                                                                                                                                                                                                                                                                                                                                                                                                                                                                                                                                                                                                                                                                                                                 | Alethea R. de Guzman; Anna Ong-Lim; Arianne A. Zamora; Asia Louisa U. Chong; Benedict A. Maralit; Candice Francheska B. Tambaoan; Carlo M. Lapid; Celia Carlos; Devon Ray Pacial; Edsel Maurice Salvaña; El King D. Morado; Eva Maria Cutiongco-de la Paz; Francis A. Tablizo; Irish Coleen A. Asin; Jaime C. Montoya; Jan Michael C. Yap; Jo-Hannah S. Llames; John Q. Wong; Joshua Gregor A. Dizon; Juan Antonio R. Magalang; Karol Sophia Agape R. Padilla; Kenneth M. Kim; Kris P. Punayan; Marc Edsel C. Ayes; Marc Jerrone R. Castro; Maria Rosario Singh-Vergeire and Cynthia P. Saloma; Maria Sofia L. Yangzon; Marissa Alejandria; Razel Nikka M.                                                                                                                                                                                                                                                                                                                                                                                                                                                                                                                                             |

|                                                                                                                                                                                                                                                                                                                                                                                                                                                                                                                                                                                                                                                                                                                                                                                                                                                                                                                                                                                                                                                                                                                                                                                                                                                                                                                                                                                                                                                                                                                                                                                                                                                                                                                                                                                                                                                                                                                                                                                                                                                                                                                                                                                                                                                                                                                                                                                                                                                                                                                                                                                                                                                                                                                                                                                                                                                                                                                                                                                                                                                                                                                                                                                                                                                                                                                                                                                                                                                                                                                                                                                                                                                                                                                                                                                                                                                                                                                                                                                                                                                                                                                                                                                                                                                                                                                                                                                                                                                                                                                                                                                                                                                                                                                                                                                                                                                                                                                                                                                                                                                                                                                                                                                                                                                                                                                                                                                                                                                                                                                                                                                                                                                                                                                                                                                                                                                                                                                                                                                                                                                                                                                                                                                                                                                                                                                                                                                                                                                                                                                                                                                                                                                                                                                                                                                                                                                                                                                                                                                                                                                                                                                                                                                                                                                                                                                                                                                                                                                                                                                                                                                                                                                                                                                                                                                                                                                                                                                                                                                                                                                                                                                                                                                                                                                                                                                                                                                                                                                                                           |                                                        |                                                            |                                                                                                                                                                                                                                                                                                                                                                                                                                                                                                                                                                                                                                                                                                                                                                                                                                                                                                                                                                                                                                                                                                                                                                                                                                                    |                                                                                                                                                                                                                                                                                                                                                                                                                                                                                                                                                                                                                                                                                                                                                                                                                                                                                                                                                                                                                                                                                                                                                                                                                                                    |
|-------------------------------------------------------------------------------------------------------------------------------------------------------------------------------------------------------------------------------------------------------------------------------------------------------------------------------------------------------------------------------------------------------------------------------------------------------------------------------------------------------------------------------------------------------------------------------------------------------------------------------------------------------------------------------------------------------------------------------------------------------------------------------------------------------------------------------------------------------------------------------------------------------------------------------------------------------------------------------------------------------------------------------------------------------------------------------------------------------------------------------------------------------------------------------------------------------------------------------------------------------------------------------------------------------------------------------------------------------------------------------------------------------------------------------------------------------------------------------------------------------------------------------------------------------------------------------------------------------------------------------------------------------------------------------------------------------------------------------------------------------------------------------------------------------------------------------------------------------------------------------------------------------------------------------------------------------------------------------------------------------------------------------------------------------------------------------------------------------------------------------------------------------------------------------------------------------------------------------------------------------------------------------------------------------------------------------------------------------------------------------------------------------------------------------------------------------------------------------------------------------------------------------------------------------------------------------------------------------------------------------------------------------------------------------------------------------------------------------------------------------------------------------------------------------------------------------------------------------------------------------------------------------------------------------------------------------------------------------------------------------------------------------------------------------------------------------------------------------------------------------------------------------------------------------------------------------------------------------------------------------------------------------------------------------------------------------------------------------------------------------------------------------------------------------------------------------------------------------------------------------------------------------------------------------------------------------------------------------------------------------------------------------------------------------------------------------------------------------------------------------------------------------------------------------------------------------------------------------------------------------------------------------------------------------------------------------------------------------------------------------------------------------------------------------------------------------------------------------------------------------------------------------------------------------------------------------------------------------------------------------------------------------------------------------------------------------------------------------------------------------------------------------------------------------------------------------------------------------------------------------------------------------------------------------------------------------------------------------------------------------------------------------------------------------------------------------------------------------------------------------------------------------------------------------------------------------------------------------------------------------------------------------------------------------------------------------------------------------------------------------------------------------------------------------------------------------------------------------------------------------------------------------------------------------------------------------------------------------------------------------------------------------------------------------------------------------------------------------------------------------------------------------------------------------------------------------------------------------------------------------------------------------------------------------------------------------------------------------------------------------------------------------------------------------------------------------------------------------------------------------------------------------------------------------------------------------------------------------------------------------------------------------------------------------------------------------------------------------------------------------------------------------------------------------------------------------------------------------------------------------------------------------------------------------------------------------------------------------------------------------------------------------------------------------------------------------------------------------------------------------------------------------------------------------------------------------------------------------------------------------------------------------------------------------------------------------------------------------------------------------------------------------------------------------------------------------------------------------------------------------------------------------------------------------------------------------------------------------------------------------------------------------------------------------------------------------------------------------------------------------------------------------------------------------------------------------------------------------------------------------------------------------------------------------------------------------------------------------------------------------------------------------------------------------------------------------------------------------------------------------------------------------------------------------------------------------------------------------------------------------------------------------------------------------------------------------------------------------------------------------------------------------------------------------------------------------------------------------------------------------------------------------------------------------------------------------------------------------------------------------------------------------------------------------------------------------------------------------------------------------------------------------------------------------------------------------------------------------------------------------------------------------------------------------------------------------------------------------------------------------------------------------------------------------------------------------------------------------------------------------------------------------------------------------------------------------------------------------------------|--------------------------------------------------------|------------------------------------------------------------|----------------------------------------------------------------------------------------------------------------------------------------------------------------------------------------------------------------------------------------------------------------------------------------------------------------------------------------------------------------------------------------------------------------------------------------------------------------------------------------------------------------------------------------------------------------------------------------------------------------------------------------------------------------------------------------------------------------------------------------------------------------------------------------------------------------------------------------------------------------------------------------------------------------------------------------------------------------------------------------------------------------------------------------------------------------------------------------------------------------------------------------------------------------------------------------------------------------------------------------------------|----------------------------------------------------------------------------------------------------------------------------------------------------------------------------------------------------------------------------------------------------------------------------------------------------------------------------------------------------------------------------------------------------------------------------------------------------------------------------------------------------------------------------------------------------------------------------------------------------------------------------------------------------------------------------------------------------------------------------------------------------------------------------------------------------------------------------------------------------------------------------------------------------------------------------------------------------------------------------------------------------------------------------------------------------------------------------------------------------------------------------------------------------------------------------------------------------------------------------------------------------|
|                                                                                                                                                                                                                                                                                                                                                                                                                                                                                                                                                                                                                                                                                                                                                                                                                                                                                                                                                                                                                                                                                                                                                                                                                                                                                                                                                                                                                                                                                                                                                                                                                                                                                                                                                                                                                                                                                                                                                                                                                                                                                                                                                                                                                                                                                                                                                                                                                                                                                                                                                                                                                                                                                                                                                                                                                                                                                                                                                                                                                                                                                                                                                                                                                                                                                                                                                                                                                                                                                                                                                                                                                                                                                                                                                                                                                                                                                                                                                                                                                                                                                                                                                                                                                                                                                                                                                                                                                                                                                                                                                                                                                                                                                                                                                                                                                                                                                                                                                                                                                                                                                                                                                                                                                                                                                                                                                                                                                                                                                                                                                                                                                                                                                                                                                                                                                                                                                                                                                                                                                                                                                                                                                                                                                                                                                                                                                                                                                                                                                                                                                                                                                                                                                                                                                                                                                                                                                                                                                                                                                                                                                                                                                                                                                                                                                                                                                                                                                                                                                                                                                                                                                                                                                                                                                                                                                                                                                                                                                                                                                                                                                                                                                                                                                                                                                                                                                                                                                                                                                           |                                                        |                                                            |                                                                                                                                                                                                                                                                                                                                                                                                                                                                                                                                                                                                                                                                                                                                                                                                                                                                                                                                                                                                                                                                                                                                                                                                                                                    | Hao; Rianna Patricia S. Cruz; Sheila Mae M. Araiza                                                                                                                                                                                                                                                                                                                                                                                                                                                                                                                                                                                                                                                                                                                                                                                                                                                                                                                                                                                                                                                                                                                                                                                                 |
| EPI_ISL_1069174                                                                                                                                                                                                                                                                                                                                                                                                                                                                                                                                                                                                                                                                                                                                                                                                                                                                                                                                                                                                                                                                                                                                                                                                                                                                                                                                                                                                                                                                                                                                                                                                                                                                                                                                                                                                                                                                                                                                                                                                                                                                                                                                                                                                                                                                                                                                                                                                                                                                                                                                                                                                                                                                                                                                                                                                                                                                                                                                                                                                                                                                                                                                                                                                                                                                                                                                                                                                                                                                                                                                                                                                                                                                                                                                                                                                                                                                                                                                                                                                                                                                                                                                                                                                                                                                                                                                                                                                                                                                                                                                                                                                                                                                                                                                                                                                                                                                                                                                                                                                                                                                                                                                                                                                                                                                                                                                                                                                                                                                                                                                                                                                                                                                                                                                                                                                                                                                                                                                                                                                                                                                                                                                                                                                                                                                                                                                                                                                                                                                                                                                                                                                                                                                                                                                                                                                                                                                                                                                                                                                                                                                                                                                                                                                                                                                                                                                                                                                                                                                                                                                                                                                                                                                                                                                                                                                                                                                                                                                                                                                                                                                                                                                                                                                                                                                                                                                                                                                                                                                           | Laguna Medical Center, Inc                             | Research Institute for Tropical Medicine                   | Catalino Demetria; Daria Manalo; Edelwisa Mercado; Francisco Gerardo Polotan; Hannah Leah Morito; Inez Andrea Medado; John Leonard Chan; Joseph Hughes; Kirstyn Brunker; Ma Angelica Tujan; Othaniel Jan Onza                                                                                                                                                                                                                                                                                                                                                                                                                                                                                                                                                                                                                                                                                                                                                                                                                                                                                                                                                                                                                                      |                                                                                                                                                                                                                                                                                                                                                                                                                                                                                                                                                                                                                                                                                                                                                                                                                                                                                                                                                                                                                                                                                                                                                                                                                                                    |
| EPI_ISL_2155069, EPI_ISL_2155106, EPI_ISL_2155158, EPI_ISL_2155160, EPI_ISL_2155188, EPI_ISL_2155199, EPI_ISL_2155212, EPI_ISL_2155271, EPI_ISL_2155345, EPI_ISL_2155640, EPI_ISL_2155972, EPI_ISL_2156407, EPI_ISL_2156420, EPI_ISL_2156489, EPI_ISL_2156524, EPI_ISL_2156637, EPI_ISL_2188046, EPI_ISL_2188205, EPI_ISL_2188206, EPI_ISL_2188909, EPI_ISL_2188999, EPI_ISL_2189321, EPI_ISL_2189333, EPI_ISL_2189339, EPI_ISL_2189353, EPI_ISL_2189398, EPI_ISL_2189413, EPI_ISL_2859610, EPI_ISL_2859619, EPI_ISL_2859650, EPI_ISL_2859660, EPI_ISL_2859747, EPI_ISL_2859783, EPI_ISL_2859803, EPI_ISL_2859804, EPI_ISL_2859809, EPI_ISL_2859821, EPI_ISL_2859827, EPI_ISL_2859886, EPI_ISL_2859924, EPI_ISL_2860012, EPI_ISL_2860034, EPI_ISL_2860054, EPI_ISL_2860085, EPI_ISL_2860115, EPI_ISL_2860116, EPI_ISL_2860152, EPI_ISL_2860171, EPI_ISL_4712489, EPI_ISL_4712903, EPI_ISL_4713005, EPI_ISL_4713129, EPI_ISL_4713172, EPI_ISL_4713237, EPI_ISL_4713280, EPI_ISL_4713329, EPI_ISL_4713441, EPI_ISL_4713490, EPI_ISL_4713568                                                                                                                                                                                                                                                                                                                                                                                                                                                                                                                                                                                                                                                                                                                                                                                                                                                                                                                                                                                                                                                                                                                                                                                                                                                                                                                                                                                                                                                                                                                                                                                                                                                                                                                                                                                                                                                                                                                                                                                                                                                                                                                                                                                                                                                                                                                                                                                                                                                                                                                                                                                                                                                                                                                                                                                                                                                                                                                                                                                                                                                                                                                                                                                                                                                                                                                                                                                                                                                                                                                                                                                                                                                                                                                                                                                                                                                                                                                                                                                                                                                                                                                                                                                                                                                                                                                                                                                                                                                                                                                                                                                                                                                                                                                                                                                                                                                                                                                                                                                                                                                                                                                                                                                                                                                                                                                                                                                                                                                                                                                                                                                                                                                                                                                                                                                                                                                                                                                                                                                                                                                                                                                                                                                                                                                                                                                                                                                                                                                                                                                                                                                                                                                                                                                                                                                                                                                                                                                                                                                                                                                                                                                                                                                                                                                                                                                                                                                                                                                 | see above                                              | Laguna Provincial Hospital - San Pablo District Hospital   | Philippine Genome Center                                                                                                                                                                                                                                                                                                                                                                                                                                                                                                                                                                                                                                                                                                                                                                                                                                                                                                                                                                                                                                                                                                                                                                                                                           | Alethea R. de Guzman; Anna Ong-Lim; Arianne A. Zamora; Asia Louisa U. Chong; Benedict A. Maralit; Candice Francheska B. Tambaoan; Carlo M. Lapid; Celia Carlos; Cynthia P. Saloma; Devon Ray Pacial; Diomedes A. Carino; Diomedes A. Cariño; Edsel Maurice Salvana; Edsel Maurice Salvaña; El King D. Morado; Elcid Aaron R. Panglinan; Eva Maria Cutiungco-de la Paz; Francis A. Tablizo; Henrietta Marie Rodriguez; Irish Coleen A. Asin; Jaime C. Montoya; Jan Michael C. Yap; Jarvin E. Nipales; Jo-Hannah S. Llamas; John Q. Wong; Joshua Gregor A. Dizon; Juan Antonio R. Magalang; Karol Sophia Agape R. Padilla; Kenneth M. Kim; Kris P. Punayan; Kristina Patriz Dela Cruz; Kristina Patriz Dela Cruz; Lindsay Claire D.L. Carandang; Lindsay Clare D.L. Carandang; Ma. Exanil Plantig; Marc Edsel C. Ayes; Marc Jerrone R. Castro; Maria Rosario Singh-Vergeire; Maria Rosario Singh-Vergeire and Cynthia P. Saloma; Maria Sofia L. Yangzon; Marielle M Gamboa; Marielle M. Gamboa; Marissa Alejandria; Nina Francesca Bustamante; Niña Francesca Bustamante; Razel Nikka M. Hao; Renato Jacinto Q. Mantaring; Rianna Patricia S. Cruz; Sheila Mae M. Araiza; Yvonne Valerie Austria; Zipporah Mariebelle R. Enriquez; Zryel V. Mollejon |
| EPI_ISL_2188182, EPI_ISL_2188878, EPI_ISL_2189318, EPI_ISL_2189343                                                                                                                                                                                                                                                                                                                                                                                                                                                                                                                                                                                                                                                                                                                                                                                                                                                                                                                                                                                                                                                                                                                                                                                                                                                                                                                                                                                                                                                                                                                                                                                                                                                                                                                                                                                                                                                                                                                                                                                                                                                                                                                                                                                                                                                                                                                                                                                                                                                                                                                                                                                                                                                                                                                                                                                                                                                                                                                                                                                                                                                                                                                                                                                                                                                                                                                                                                                                                                                                                                                                                                                                                                                                                                                                                                                                                                                                                                                                                                                                                                                                                                                                                                                                                                                                                                                                                                                                                                                                                                                                                                                                                                                                                                                                                                                                                                                                                                                                                                                                                                                                                                                                                                                                                                                                                                                                                                                                                                                                                                                                                                                                                                                                                                                                                                                                                                                                                                                                                                                                                                                                                                                                                                                                                                                                                                                                                                                                                                                                                                                                                                                                                                                                                                                                                                                                                                                                                                                                                                                                                                                                                                                                                                                                                                                                                                                                                                                                                                                                                                                                                                                                                                                                                                                                                                                                                                                                                                                                                                                                                                                                                                                                                                                                                                                                                                                                                                                                                        | Las Piñas General Hospital and Satellite Trauma Center | Philippine Genome Center                                   | Alethea R. de Guzman; Anna Ong-Lim; Arianne A. Zamora; Asia Louisa U. Chong; Benedict A. Maralit; Candice Francheska B. Tambaoan; Carlo M. Lapid; Celia Carlos; Devon Ray Pacial; Edsel Maurice Salvaña; El King D. Morado; Elcid Aaron R. Panglinan; Eva Maria Cutiungco-de la Paz; Francis A. Tablizo; Irish Coleen A. Asin; Jaime C. Montoya; Jan Michael C. Yap; Jo-Hannah S. Llamas; John Q. Wong; Joshua Gregor A. Dizon; Juan Antonio R. Magalang; Karol Sophia Agape R. Padilla; Kenneth M. Kim; Kris P. Punayan; Marc Edsel C. Ayes; Marc Jerrone R. Castro; Maria Rosario Singh-Vergeire and Cynthia P. Saloma; Maria Sofia L. Yangzon; Marietta Alejandria; Razel Nikka M. Hao; Renato Jacinto Q. Mantaring; Rianna Patricia S. Cruz; Sheila Mae M. Araiza                                                                                                                                                                                                                                                                                                                                                                                                                                                                              |                                                                                                                                                                                                                                                                                                                                                                                                                                                                                                                                                                                                                                                                                                                                                                                                                                                                                                                                                                                                                                                                                                                                                                                                                                                    |
| EPI_ISL_3105877, EPI_ISL_3105881, EPI_ISL_3105885                                                                                                                                                                                                                                                                                                                                                                                                                                                                                                                                                                                                                                                                                                                                                                                                                                                                                                                                                                                                                                                                                                                                                                                                                                                                                                                                                                                                                                                                                                                                                                                                                                                                                                                                                                                                                                                                                                                                                                                                                                                                                                                                                                                                                                                                                                                                                                                                                                                                                                                                                                                                                                                                                                                                                                                                                                                                                                                                                                                                                                                                                                                                                                                                                                                                                                                                                                                                                                                                                                                                                                                                                                                                                                                                                                                                                                                                                                                                                                                                                                                                                                                                                                                                                                                                                                                                                                                                                                                                                                                                                                                                                                                                                                                                                                                                                                                                                                                                                                                                                                                                                                                                                                                                                                                                                                                                                                                                                                                                                                                                                                                                                                                                                                                                                                                                                                                                                                                                                                                                                                                                                                                                                                                                                                                                                                                                                                                                                                                                                                                                                                                                                                                                                                                                                                                                                                                                                                                                                                                                                                                                                                                                                                                                                                                                                                                                                                                                                                                                                                                                                                                                                                                                                                                                                                                                                                                                                                                                                                                                                                                                                                                                                                                                                                                                                                                                                                                                                                         | Las Piñas General Hospital and Satellite Trauma Center | Research Institute for Tropical Medicine                   | Clyde Dapaz; Deana Mae Ocampo; Emmanuel Kagning Tsinda; Francisco Gerardo Polotan; Hitoshi Oshitani; Inez Andrea Medado; Jefferson Earl Halog; Joana Ina Manalo; Lei Lanna Dancel; Ma Angelica Tujan; Mariko Saito-Obata; Mayuko Saito; Michiko Okamoto; Samantha Louise Bado                                                                                                                                                                                                                                                                                                                                                                                                                                                                                                                                                                                                                                                                                                                                                                                                                                                                                                                                                                      |                                                                                                                                                                                                                                                                                                                                                                                                                                                                                                                                                                                                                                                                                                                                                                                                                                                                                                                                                                                                                                                                                                                                                                                                                                                    |
| EPI_ISL_1069188                                                                                                                                                                                                                                                                                                                                                                                                                                                                                                                                                                                                                                                                                                                                                                                                                                                                                                                                                                                                                                                                                                                                                                                                                                                                                                                                                                                                                                                                                                                                                                                                                                                                                                                                                                                                                                                                                                                                                                                                                                                                                                                                                                                                                                                                                                                                                                                                                                                                                                                                                                                                                                                                                                                                                                                                                                                                                                                                                                                                                                                                                                                                                                                                                                                                                                                                                                                                                                                                                                                                                                                                                                                                                                                                                                                                                                                                                                                                                                                                                                                                                                                                                                                                                                                                                                                                                                                                                                                                                                                                                                                                                                                                                                                                                                                                                                                                                                                                                                                                                                                                                                                                                                                                                                                                                                                                                                                                                                                                                                                                                                                                                                                                                                                                                                                                                                                                                                                                                                                                                                                                                                                                                                                                                                                                                                                                                                                                                                                                                                                                                                                                                                                                                                                                                                                                                                                                                                                                                                                                                                                                                                                                                                                                                                                                                                                                                                                                                                                                                                                                                                                                                                                                                                                                                                                                                                                                                                                                                                                                                                                                                                                                                                                                                                                                                                                                                                                                                                                                           | Lumban Rural Health Unit                               | Research Institute for Tropical Medicine                   | Catalino Demetria; Daria Manalo; Edelwisa Mercado; Francisco Gerardo Polotan; Hannah Leah Morito; Inez Andrea Medado; John Leonard Chan; Joseph Hughes; Kirstyn Brunker; Ma Angelica Tujan; Othaniel Jan Onza                                                                                                                                                                                                                                                                                                                                                                                                                                                                                                                                                                                                                                                                                                                                                                                                                                                                                                                                                                                                                                      |                                                                                                                                                                                                                                                                                                                                                                                                                                                                                                                                                                                                                                                                                                                                                                                                                                                                                                                                                                                                                                                                                                                                                                                                                                                    |
| EPI_ISL_430844                                                                                                                                                                                                                                                                                                                                                                                                                                                                                                                                                                                                                                                                                                                                                                                                                                                                                                                                                                                                                                                                                                                                                                                                                                                                                                                                                                                                                                                                                                                                                                                                                                                                                                                                                                                                                                                                                                                                                                                                                                                                                                                                                                                                                                                                                                                                                                                                                                                                                                                                                                                                                                                                                                                                                                                                                                                                                                                                                                                                                                                                                                                                                                                                                                                                                                                                                                                                                                                                                                                                                                                                                                                                                                                                                                                                                                                                                                                                                                                                                                                                                                                                                                                                                                                                                                                                                                                                                                                                                                                                                                                                                                                                                                                                                                                                                                                                                                                                                                                                                                                                                                                                                                                                                                                                                                                                                                                                                                                                                                                                                                                                                                                                                                                                                                                                                                                                                                                                                                                                                                                                                                                                                                                                                                                                                                                                                                                                                                                                                                                                                                                                                                                                                                                                                                                                                                                                                                                                                                                                                                                                                                                                                                                                                                                                                                                                                                                                                                                                                                                                                                                                                                                                                                                                                                                                                                                                                                                                                                                                                                                                                                                                                                                                                                                                                                                                                                                                                                                                            | Lung Center of the Philippines                         | Research Institute for Tropical Medicine                   | Bautista; Brunker, K.; C.S.; C.T.; D.L.; Demetria; E.S.; F.G.M.; I.A.P.; Manalo; Medado; Mercado; O.J.T.; Onza; Polotan                                                                                                                                                                                                                                                                                                                                                                                                                                                                                                                                                                                                                                                                                                                                                                                                                                                                                                                                                                                                                                                                                                                            |                                                                                                                                                                                                                                                                                                                                                                                                                                                                                                                                                                                                                                                                                                                                                                                                                                                                                                                                                                                                                                                                                                                                                                                                                                                    |
| EPI_ISL_1213568, EPI_ISL_2155762, EPI_ISL_2155763, EPI_ISL_2155764, EPI_ISL_2155765, EPI_ISL_2155766, EPI_ISL_2156223, EPI_ISL_2156224, EPI_ISL_2156225, EPI_ISL_2156321, EPI_ISL_2156513, EPI_ISL_2156514, EPI_ISL_2156523, EPI_ISL_2156527, EPI_ISL_2859188, EPI_ISL_2859315, EPI_ISL_4712850                                                                                                                                                                                                                                                                                                                                                                                                                                                                                                                                                                                                                                                                                                                                                                                                                                                                                                                                                                                                                                                                                                                                                                                                                                                                                                                                                                                                                                                                                                                                                                                                                                                                                                                                                                                                                                                                                                                                                                                                                                                                                                                                                                                                                                                                                                                                                                                                                                                                                                                                                                                                                                                                                                                                                                                                                                                                                                                                                                                                                                                                                                                                                                                                                                                                                                                                                                                                                                                                                                                                                                                                                                                                                                                                                                                                                                                                                                                                                                                                                                                                                                                                                                                                                                                                                                                                                                                                                                                                                                                                                                                                                                                                                                                                                                                                                                                                                                                                                                                                                                                                                                                                                                                                                                                                                                                                                                                                                                                                                                                                                                                                                                                                                                                                                                                                                                                                                                                                                                                                                                                                                                                                                                                                                                                                                                                                                                                                                                                                                                                                                                                                                                                                                                                                                                                                                                                                                                                                                                                                                                                                                                                                                                                                                                                                                                                                                                                                                                                                                                                                                                                                                                                                                                                                                                                                                                                                                                                                                                                                                                                                                                                                                                                           | see above                                              | Lung Center of the Philippines (LCP)                       | Alethea R. de Guzman; Anna Ong-Lim; Arianne A. Zamora; Asia Louisa U. Chong; Benedict A. Maralit; Candice Francheska B. Tambaoan; Carlo M. Lapid; Celia Carlos; Cynthia P. Saloma; Devon Ray Pacial; Diomedes A. Carino; Diomedes A. Cariño; Edsel Maurice Salvana; Edsel Maurice Salvaña; El King D. Morado; Elcid Aaron R. Panglinan; Eva Maria Cutiungco-de la Paz; Francis A. Tablizo; Henrietta Marie Rodriguez; Irish Coleen A. Asin; Jaime C. Montoya; Jan Michael C. Yap; Jarvin E. Nipales; Jo-Hannah S. Llamas; John Q. Wong; Joshua Gregor A. Dizon; Juan Antonio R. Magalang; Karol Sophia Agape R. Padilla; Kenneth M. Kim; Kris P. Punayan; Kristina Patriz Dela Cruz; Kristina Patriz Dela Cruz; Lindsay Claire D.L. Carandang; Lindsay Clare D.L. Carandang; Ma. Exanil Plantig; Marc Edsel C. Ayes; Marc Jerrone R. Castro; Maria Rosario Singh-Vergeire; Maria Rosario Singh-Vergeire and Cynthia P. Saloma; Maria Sofia L. Yangzon; Marielle M Gamboa; Marielle M. Gamboa; Marissa Alejandria; Nina Francesca Bustamante; Niña Francesca Bustamante; Razel Nikka M. Hao; Renato Jacinto Q. Mantaring; Rianna Patricia S. Cruz; Sheila Mae M. Araiza; Yvonne Valerie Austria; Zipporah Mariebelle R. Enriquez; Zryel V. Mollejon |                                                                                                                                                                                                                                                                                                                                                                                                                                                                                                                                                                                                                                                                                                                                                                                                                                                                                                                                                                                                                                                                                                                                                                                                                                                    |
| EPI_ISL_4459480                                                                                                                                                                                                                                                                                                                                                                                                                                                                                                                                                                                                                                                                                                                                                                                                                                                                                                                                                                                                                                                                                                                                                                                                                                                                                                                                                                                                                                                                                                                                                                                                                                                                                                                                                                                                                                                                                                                                                                                                                                                                                                                                                                                                                                                                                                                                                                                                                                                                                                                                                                                                                                                                                                                                                                                                                                                                                                                                                                                                                                                                                                                                                                                                                                                                                                                                                                                                                                                                                                                                                                                                                                                                                                                                                                                                                                                                                                                                                                                                                                                                                                                                                                                                                                                                                                                                                                                                                                                                                                                                                                                                                                                                                                                                                                                                                                                                                                                                                                                                                                                                                                                                                                                                                                                                                                                                                                                                                                                                                                                                                                                                                                                                                                                                                                                                                                                                                                                                                                                                                                                                                                                                                                                                                                                                                                                                                                                                                                                                                                                                                                                                                                                                                                                                                                                                                                                                                                                                                                                                                                                                                                                                                                                                                                                                                                                                                                                                                                                                                                                                                                                                                                                                                                                                                                                                                                                                                                                                                                                                                                                                                                                                                                                                                                                                                                                                                                                                                                                                           | MA. ESTRELLA GENERAL HOSPITAL                          | Research Institute for Tropical Medicine/Tohoku University | Allen Anthony Laraño; Ardiane Ysabelle Dolor; Catalino Demetria; Clyde Dapaz; Emmanuel Kagning Tsinda; Francisco Gerardo Polotan; Hitoshi Oshitani; Inez Andrea Medado; Jefferson Earl Halog; Lei Lanna Dancel; Leilanie Nacion; Ma. Angelica Tujan; Machiko Okamoto; Maria Carmen Corpuz; Mariko Siato-Obata; Mayuko Saito                                                                                                                                                                                                                                                                                                                                                                                                                                                                                                                                                                                                                                                                                                                                                                                                                                                                                                                        |                                                                                                                                                                                                                                                                                                                                                                                                                                                                                                                                                                                                                                                                                                                                                                                                                                                                                                                                                                                                                                                                                                                                                                                                                                                    |
| EPI_ISL_4459430, EPI_ISL_4459471                                                                                                                                                                                                                                                                                                                                                                                                                                                                                                                                                                                                                                                                                                                                                                                                                                                                                                                                                                                                                                                                                                                                                                                                                                                                                                                                                                                                                                                                                                                                                                                                                                                                                                                                                                                                                                                                                                                                                                                                                                                                                                                                                                                                                                                                                                                                                                                                                                                                                                                                                                                                                                                                                                                                                                                                                                                                                                                                                                                                                                                                                                                                                                                                                                                                                                                                                                                                                                                                                                                                                                                                                                                                                                                                                                                                                                                                                                                                                                                                                                                                                                                                                                                                                                                                                                                                                                                                                                                                                                                                                                                                                                                                                                                                                                                                                                                                                                                                                                                                                                                                                                                                                                                                                                                                                                                                                                                                                                                                                                                                                                                                                                                                                                                                                                                                                                                                                                                                                                                                                                                                                                                                                                                                                                                                                                                                                                                                                                                                                                                                                                                                                                                                                                                                                                                                                                                                                                                                                                                                                                                                                                                                                                                                                                                                                                                                                                                                                                                                                                                                                                                                                                                                                                                                                                                                                                                                                                                                                                                                                                                                                                                                                                                                                                                                                                                                                                                                                                                          | MATAAS NA KAHŌY RURAL HEALTH UNIT                      | Research Institute for Tropical Medicine/Tohoku University | Allen Anthony Laraño; Ardiane Ysabelle Dolor; Catalino Demetria; Clyde Dapaz; Emmanuel Kagning Tsinda; Francisco Gerardo Polotan; Hitoshi Oshitani; Inez Andrea Medado; Jefferson Earl Halog; Lei Lanna Dancel; Leilanie Nacion; Ma. Angelica Tujan; Machiko Okamoto; Maria Carmen Corpuz; Mariko Siato-Obata; Mayuko Saito                                                                                                                                                                                                                                                                                                                                                                                                                                                                                                                                                                                                                                                                                                                                                                                                                                                                                                                        |                                                                                                                                                                                                                                                                                                                                                                                                                                                                                                                                                                                                                                                                                                                                                                                                                                                                                                                                                                                                                                                                                                                                                                                                                                                    |
| EPI_ISL_4459292                                                                                                                                                                                                                                                                                                                                                                                                                                                                                                                                                                                                                                                                                                                                                                                                                                                                                                                                                                                                                                                                                                                                                                                                                                                                                                                                                                                                                                                                                                                                                                                                                                                                                                                                                                                                                                                                                                                                                                                                                                                                                                                                                                                                                                                                                                                                                                                                                                                                                                                                                                                                                                                                                                                                                                                                                                                                                                                                                                                                                                                                                                                                                                                                                                                                                                                                                                                                                                                                                                                                                                                                                                                                                                                                                                                                                                                                                                                                                                                                                                                                                                                                                                                                                                                                                                                                                                                                                                                                                                                                                                                                                                                                                                                                                                                                                                                                                                                                                                                                                                                                                                                                                                                                                                                                                                                                                                                                                                                                                                                                                                                                                                                                                                                                                                                                                                                                                                                                                                                                                                                                                                                                                                                                                                                                                                                                                                                                                                                                                                                                                                                                                                                                                                                                                                                                                                                                                                                                                                                                                                                                                                                                                                                                                                                                                                                                                                                                                                                                                                                                                                                                                                                                                                                                                                                                                                                                                                                                                                                                                                                                                                                                                                                                                                                                                                                                                                                                                                                                           | MEDICAL CENTER MUNTINLUPA, INC                         | Research Institute for Tropical Medicine/Tohoku University | Allen Anthony Laraño; Ardiane Ysabelle Dolor; Catalino Demetria; Clyde Dapaz; Emmanuel Kagning Tsinda; Francisco Gerardo Polotan; Hitoshi Oshitani; Inez Andrea Medado; Jefferson Earl Halog; Lei Lanna Dancel; Leilanie Nacion; Ma. Angelica Tujan; Machiko Okamoto; Maria Carmen Corpuz; Mariko Siato-Obata; Mayuko Saito                                                                                                                                                                                                                                                                                                                                                                                                                                                                                                                                                                                                                                                                                                                                                                                                                                                                                                                        |                                                                                                                                                                                                                                                                                                                                                                                                                                                                                                                                                                                                                                                                                                                                                                                                                                                                                                                                                                                                                                                                                                                                                                                                                                                    |
| EPI_ISL_4459427                                                                                                                                                                                                                                                                                                                                                                                                                                                                                                                                                                                                                                                                                                                                                                                                                                                                                                                                                                                                                                                                                                                                                                                                                                                                                                                                                                                                                                                                                                                                                                                                                                                                                                                                                                                                                                                                                                                                                                                                                                                                                                                                                                                                                                                                                                                                                                                                                                                                                                                                                                                                                                                                                                                                                                                                                                                                                                                                                                                                                                                                                                                                                                                                                                                                                                                                                                                                                                                                                                                                                                                                                                                                                                                                                                                                                                                                                                                                                                                                                                                                                                                                                                                                                                                                                                                                                                                                                                                                                                                                                                                                                                                                                                                                                                                                                                                                                                                                                                                                                                                                                                                                                                                                                                                                                                                                                                                                                                                                                                                                                                                                                                                                                                                                                                                                                                                                                                                                                                                                                                                                                                                                                                                                                                                                                                                                                                                                                                                                                                                                                                                                                                                                                                                                                                                                                                                                                                                                                                                                                                                                                                                                                                                                                                                                                                                                                                                                                                                                                                                                                                                                                                                                                                                                                                                                                                                                                                                                                                                                                                                                                                                                                                                                                                                                                                                                                                                                                                                                           | METRO LEMERY MEDICAL CENTER                            | Research Institute for Tropical Medicine/Tohoku University | Allen Anthony Laraño; Ardiane Ysabelle Dolor; Catalino Demetria; Clyde Dapaz; Emmanuel Kagning Tsinda; Francisco Gerardo Polotan; Hitoshi Oshitani; Inez Andrea Medado; Jefferson Earl Halog; Lei Lanna Dancel; Leilanie Nacion; Ma. Angelica Tujan; Machiko Okamoto; Maria Carmen Corpuz; Mariko Siato-Obata; Mayuko Saito                                                                                                                                                                                                                                                                                                                                                                                                                                                                                                                                                                                                                                                                                                                                                                                                                                                                                                                        |                                                                                                                                                                                                                                                                                                                                                                                                                                                                                                                                                                                                                                                                                                                                                                                                                                                                                                                                                                                                                                                                                                                                                                                                                                                    |
| EPI_ISL_4459356                                                                                                                                                                                                                                                                                                                                                                                                                                                                                                                                                                                                                                                                                                                                                                                                                                                                                                                                                                                                                                                                                                                                                                                                                                                                                                                                                                                                                                                                                                                                                                                                                                                                                                                                                                                                                                                                                                                                                                                                                                                                                                                                                                                                                                                                                                                                                                                                                                                                                                                                                                                                                                                                                                                                                                                                                                                                                                                                                                                                                                                                                                                                                                                                                                                                                                                                                                                                                                                                                                                                                                                                                                                                                                                                                                                                                                                                                                                                                                                                                                                                                                                                                                                                                                                                                                                                                                                                                                                                                                                                                                                                                                                                                                                                                                                                                                                                                                                                                                                                                                                                                                                                                                                                                                                                                                                                                                                                                                                                                                                                                                                                                                                                                                                                                                                                                                                                                                                                                                                                                                                                                                                                                                                                                                                                                                                                                                                                                                                                                                                                                                                                                                                                                                                                                                                                                                                                                                                                                                                                                                                                                                                                                                                                                                                                                                                                                                                                                                                                                                                                                                                                                                                                                                                                                                                                                                                                                                                                                                                                                                                                                                                                                                                                                                                                                                                                                                                                                                                                           | METRO SAN JOSE MEDICAL CENTER                          | Research Institute for Tropical Medicine/Tohoku University | Allen Anthony Laraño; Ardiane Ysabelle Dolor; Catalino Demetria; Clyde Dapaz; Emmanuel Kagning Tsinda; Francisco Gerardo Polotan; Hitoshi Oshitani; Inez Andrea Medado; Jefferson Earl Halog; Lei Lanna Dancel; Leilanie Nacion; Ma. Angelica Tujan; Machiko Okamoto; Maria Carmen Corpuz; Mariko Siato-Obata; Mayuko Saito                                                                                                                                                                                                                                                                                                                                                                                                                                                                                                                                                                                                                                                                                                                                                                                                                                                                                                                        |                                                                                                                                                                                                                                                                                                                                                                                                                                                                                                                                                                                                                                                                                                                                                                                                                                                                                                                                                                                                                                                                                                                                                                                                                                                    |
| EPI_ISL_4459450, EPI_ISL_4459453, EPI_ISL_4459483                                                                                                                                                                                                                                                                                                                                                                                                                                                                                                                                                                                                                                                                                                                                                                                                                                                                                                                                                                                                                                                                                                                                                                                                                                                                                                                                                                                                                                                                                                                                                                                                                                                                                                                                                                                                                                                                                                                                                                                                                                                                                                                                                                                                                                                                                                                                                                                                                                                                                                                                                                                                                                                                                                                                                                                                                                                                                                                                                                                                                                                                                                                                                                                                                                                                                                                                                                                                                                                                                                                                                                                                                                                                                                                                                                                                                                                                                                                                                                                                                                                                                                                                                                                                                                                                                                                                                                                                                                                                                                                                                                                                                                                                                                                                                                                                                                                                                                                                                                                                                                                                                                                                                                                                                                                                                                                                                                                                                                                                                                                                                                                                                                                                                                                                                                                                                                                                                                                                                                                                                                                                                                                                                                                                                                                                                                                                                                                                                                                                                                                                                                                                                                                                                                                                                                                                                                                                                                                                                                                                                                                                                                                                                                                                                                                                                                                                                                                                                                                                                                                                                                                                                                                                                                                                                                                                                                                                                                                                                                                                                                                                                                                                                                                                                                                                                                                                                                                                                                         | MOGPOG RURAL HEALTH UNIT                               | Research Institute for Tropical Medicine/Tohoku University | Allen Anthony Laraño; Ardiane Ysabelle Dolor; Catalino Demetria; Clyde Dapaz; Emmanuel Kagning Tsinda; Francisco Gerardo Polotan; Hitoshi Oshitani; Inez Andrea Medado; Jefferson Earl Halog; Lei Lanna Dancel; Leilanie Nacion; Ma. Angelica Tujan; Machiko Okamoto; Maria Carmen Corpuz; Mariko Siato-Obata; Mayuko Saito                                                                                                                                                                                                                                                                                                                                                                                                                                                                                                                                                                                                                                                                                                                                                                                                                                                                                                                        |                                                                                                                                                                                                                                                                                                                                                                                                                                                                                                                                                                                                                                                                                                                                                                                                                                                                                                                                                                                                                                                                                                                                                                                                                                                    |
| EPI_ISL_2154931, EPI_ISL_2155406, EPI_ISL_2155407, EPI_ISL_2155408, EPI_ISL_2155409, EPI_ISL_2155410, EPI_ISL_2155411, EPI_ISL_4716025                                                                                                                                                                                                                                                                                                                                                                                                                                                                                                                                                                                                                                                                                                                                                                                                                                                                                                                                                                                                                                                                                                                                                                                                                                                                                                                                                                                                                                                                                                                                                                                                                                                                                                                                                                                                                                                                                                                                                                                                                                                                                                                                                                                                                                                                                                                                                                                                                                                                                                                                                                                                                                                                                                                                                                                                                                                                                                                                                                                                                                                                                                                                                                                                                                                                                                                                                                                                                                                                                                                                                                                                                                                                                                                                                                                                                                                                                                                                                                                                                                                                                                                                                                                                                                                                                                                                                                                                                                                                                                                                                                                                                                                                                                                                                                                                                                                                                                                                                                                                                                                                                                                                                                                                                                                                                                                                                                                                                                                                                                                                                                                                                                                                                                                                                                                                                                                                                                                                                                                                                                                                                                                                                                                                                                                                                                                                                                                                                                                                                                                                                                                                                                                                                                                                                                                                                                                                                                                                                                                                                                                                                                                                                                                                                                                                                                                                                                                                                                                                                                                                                                                                                                                                                                                                                                                                                                                                                                                                                                                                                                                                                                                                                                                                                                                                                                                                                    | see above                                              | Makati Medical Center                                      | Alethea R. de Guzman; Anna Ong-Lim; Arianne A. Zamora; Asia Louisa U. Chong; Benedict A. Maralit; Candice Francheska B. Tambaoan; Carlo M. Lapid; Celia Carlos; Cynthia P. Saloma; Devon Ray Pacial; Diomedes A. Cariño; Edsel Maurice Salvana; Edsel Maurice Salvaña; El King D. Morado; Elcid Aaron R. Panglinan; Eva Maria Cutiungco-de la Paz; Francis A. Tablizo; Henrietta Marie Rodriguez; Irish Coleen A. Asin; Jaime C. Montoya; Jan Michael C. Yap; Jarvin E. Nipales; Jo-Hannah S. Llamas; John Q. Wong; Joshua Gregor A. Dizon; Juan Antonio R. Magalang; Karol Sophia Agape R. Padilla; Kenneth M. Kim; Kris P. Punayan; Kristina Patriz Dela Cruz; Lindsay Claire D.L. Carandang; Ma. Exanil Plantig; Marc Edsel C. Ayes; Marc Jerrone R. Castro; Maria Rosario Singh-Vergeire; Maria Rosario Singh-Vergeire and Cynthia P. Saloma; Maria Sofia L. Yangzon; Marielle M Gamboa; Marielle M. Gamboa; Marissa Alejandria; Niña Francesca Bustamante; Razel Nikka M. Hao; Renato Jacinto Q. Mantaring; Rianna Patricia S. Cruz; Sheila Mae M. Araiza; Yvonne Valerie Austria; Zipporah Mariebelle R. Enriquez; Zryel V. Mollejon                                                                                                         |                                                                                                                                                                                                                                                                                                                                                                                                                                                                                                                                                                                                                                                                                                                                                                                                                                                                                                                                                                                                                                                                                                                                                                                                                                                    |
| EPI_ISL_430838                                                                                                                                                                                                                                                                                                                                                                                                                                                                                                                                                                                                                                                                                                                                                                                                                                                                                                                                                                                                                                                                                                                                                                                                                                                                                                                                                                                                                                                                                                                                                                                                                                                                                                                                                                                                                                                                                                                                                                                                                                                                                                                                                                                                                                                                                                                                                                                                                                                                                                                                                                                                                                                                                                                                                                                                                                                                                                                                                                                                                                                                                                                                                                                                                                                                                                                                                                                                                                                                                                                                                                                                                                                                                                                                                                                                                                                                                                                                                                                                                                                                                                                                                                                                                                                                                                                                                                                                                                                                                                                                                                                                                                                                                                                                                                                                                                                                                                                                                                                                                                                                                                                                                                                                                                                                                                                                                                                                                                                                                                                                                                                                                                                                                                                                                                                                                                                                                                                                                                                                                                                                                                                                                                                                                                                                                                                                                                                                                                                                                                                                                                                                                                                                                                                                                                                                                                                                                                                                                                                                                                                                                                                                                                                                                                                                                                                                                                                                                                                                                                                                                                                                                                                                                                                                                                                                                                                                                                                                                                                                                                                                                                                                                                                                                                                                                                                                                                                                                                                                            | Makati Medical Center                                  | Research Institute for Tropical Medicine                   | Bautista; Brunker, K.; C.S.; C.T.; D.L.; Demetria; E.S.; F.G.M.; I.A.P.; Manalo; Medado; Mercado; O.J.T.; Onza; Polotan                                                                                                                                                                                                                                                                                                                                                                                                                                                                                                                                                                                                                                                                                                                                                                                                                                                                                                                                                                                                                                                                                                                            |                                                                                                                                                                                                                                                                                                                                                                                                                                                                                                                                                                                                                                                                                                                                                                                                                                                                                                                                                                                                                                                                                                                                                                                                                                                    |
| EPI_ISL_2154004                                                                                                                                                                                                                                                                                                                                                                                                                                                                                                                                                                                                                                                                                                                                                                                                                                                                                                                                                                                                                                                                                                                                                                                                                                                                                                                                                                                                                                                                                                                                                                                                                                                                                                                                                                                                                                                                                                                                                                                                                                                                                                                                                                                                                                                                                                                                                                                                                                                                                                                                                                                                                                                                                                                                                                                                                                                                                                                                                                                                                                                                                                                                                                                                                                                                                                                                                                                                                                                                                                                                                                                                                                                                                                                                                                                                                                                                                                                                                                                                                                                                                                                                                                                                                                                                                                                                                                                                                                                                                                                                                                                                                                                                                                                                                                                                                                                                                                                                                                                                                                                                                                                                                                                                                                                                                                                                                                                                                                                                                                                                                                                                                                                                                                                                                                                                                                                                                                                                                                                                                                                                                                                                                                                                                                                                                                                                                                                                                                                                                                                                                                                                                                                                                                                                                                                                                                                                                                                                                                                                                                                                                                                                                                                                                                                                                                                                                                                                                                                                                                                                                                                                                                                                                                                                                                                                                                                                                                                                                                                                                                                                                                                                                                                                                                                                                                                                                                                                                                                                           | Mandaluyong City Medical Center                        | Philippine Genome Center                                   | Alethea R. de Guzman; Anna Ong-Lim; Arianne A. Zamora; Asia Louisa U. Chong; Benedict A. Maralit; Candice Francheska B. Tambaoan; Carlo M. Lapid; Celia Carlos; Devon Ray Pacial; Edsel Maurice Salvaña; El King D. Morado; Eva Maria Cutiungco-de la Paz; Francis A. Tablizo; Irish Coleen A. Asin; Jaime C. Montoya; Jan Michael C. Yap; Jo-Hannah S. Llamas; John Q. Wong; Joshua Gregor A. Dizon; Juan Antonio R. Magalang; Karol Sophia Agape R. Padilla; Kenneth M. Kim; Kris P. Punayan; Marc Edsel C. Ayes; Marc Jerrone R. Castro; Maria Rosario Singh-Vergeire and Cynthia P. Saloma; Maria Sofia L. Yangzon; Marietta Alejandria; Razel Nikka M. Hao; Rianna Patricia S. Cruz; Sheila Mae M. Araiza                                                                                                                                                                                                                                                                                                                                                                                                                                                                                                                                     |                                                                                                                                                                                                                                                                                                                                                                                                                                                                                                                                                                                                                                                                                                                                                                                                                                                                                                                                                                                                                                                                                                                                                                                                                                                    |
| EPI_ISL_1122456, EPI_ISL_1213569, EPI_ISL_2105475, EPI_ISL_2105558, EPI_ISL_2155010, EPI_ISL_2155096, EPI_ISL_2155107, EPI_ISL_2155297, EPI_ISL_2155487, EPI_ISL_2155489, EPI_ISL_2155490, EPI_ISL_2155491, EPI_ISL_2155492, EPI_ISL_2155493, EPI_ISL_2155494, EPI_ISL_2155495, EPI_ISL_2155496, EPI_ISL_2155497, EPI_ISL_2155498, EPI_ISL_2155500, EPI_ISL_2155502, EPI_ISL_2155503, EPI_ISL_2155504, EPI_ISL_2155505, EPI_ISL_2155507, EPI_ISL_2155508, EPI_ISL_2155509, EPI_ISL_2155513, EPI_ISL_2155515, EPI_ISL_2155517, EPI_ISL_2155519, EPI_ISL_2155516, EPI_ISL_2155517, EPI_ISL_2156118, EPI_ISL_2156119, EPI_ISL_2156120, EPI_ISL_2156121, EPI_ISL_2156122, EPI_ISL_2156123, EPI_ISL_2156452, EPI_ISL_2156453, EPI_ISL_2156596, EPI_ISL_2156613, EPI_ISL_2156662, EPI_ISL_2156667, EPI_ISL_2156697, EPI_ISL_2156730, EPI_ISL_2156731, EPI_ISL_4715305                                                                                                                                                                                                                                                                                                                                                                                                                                                                                                                                                                                                                                                                                                                                                                                                                                                                                                                                                                                                                                                                                                                                                                                                                                                                                                                                                                                                                                                                                                                                                                                                                                                                                                                                                                                                                                                                                                                                                                                                                                                                                                                                                                                                                                                                                                                                                                                                                                                                                                                                                                                                                                                                                                                                                                                                                                                                                                                                                                                                                                                                                                                                                                                                                                                                                                                                                                                                                                                                                                                                                                                                                                                                                                                                                                                                                                                                                                                                                                                                                                                                                                                                                                                                                                                                                                                                                                                                                                                                                                                                                                                                                                                                                                                                                                                                                                                                                                                                                                                                                                                                                                                                                                                                                                                                                                                                                                                                                                                                                                                                                                                                                                                                                                                                                                                                                                                                                                                                                                                                                                                                                                                                                                                                                                                                                                                                                                                                                                                                                                                                                                                                                                                                                                                                                                                                                                                                                                                                                                                                                                                                                                                                                                                                                                                                                                                                                                                                                                                                                                                                                                                                                           | see above                                              | Manila Doctors Hospital                                    | Alethea R. de Guzman; Anna Ong-Lim; Arianne A. Zamora; Asia Louisa U. Chong; Benedict A. Maralit; Candice Francheska B. Tambaoan; Carlo M. Lapid; Celia Carlos; Cynthia P. Saloma; Devon Ray Pacial; Diomedes A. Cariño; Edsel Maurice Salvana; Edsel Maurice Salvaña; El King D. Morado; Elcid Aaron R. Panglinan; Eva Maria Cutiungco-de la Paz; Francis A. Tablizo; Henrietta Marie Rodriguez; Irish Coleen A. Asin; Jaime C. Montoya; Jan Michael C. Yap; Jarvin E. Nipales; Jo-Hannah S. Llamas; John Q. Wong; Joshua Gregor A. Dizon; Juan Antonio R. Magalang; Karol Sophia Agape R. Padilla; Kenneth M. Kim; Kris P. Punayan; Kristina Patriz Dela Cruz; Lindsay Claire D.L. Carandang; Ma. Exanil Plantig; Marc Edsel C. Ayes; Marc Jerrone R. Castro; Maria Rosario Singh-Vergeire; Maria Rosario Singh-Vergeire and Cynthia P. Saloma; Maria Sofia L. Yangzon; Marielle M Gamboa; Marielle M. Gamboa; Marissa Alejandria; Niña Francesca Bustamante; Razel Nikka M. Hao; Renato Jacinto Q. Mantaring; Rianna Patricia S. Cruz; Sheila Mae M. Araiza; Yvonne Valerie Austria; Zipporah Mariebelle R. Enriquez; Zryel V. Mollejon                                                                                                         |                                                                                                                                                                                                                                                                                                                                                                                                                                                                                                                                                                                                                                                                                                                                                                                                                                                                                                                                                                                                                                                                                                                                                                                                                                                    |
| EPI_ISL_2859236, EPI_ISL_4714241, EPI_ISL_4714252, EPI_ISL_4714571, EPI_ISL_4714657, EPI_ISL_4714729, EPI_ISL_4714833, EPI_ISL_4715269, EPI_ISL_4715431, EPI_ISL_4715437, EPI_ISL_4715480, EPI_ISL_4715494, EPI_ISL_4715513, EPI_ISL_4715519, EPI_ISL_4715554, EPI_ISL_4715597, EPI_ISL_4715603                                                                                                                                                                                                                                                                                                                                                                                                                                                                                                                                                                                                                                                                                                                                                                                                                                                                                                                                                                                                                                                                                                                                                                                                                                                                                                                                                                                                                                                                                                                                                                                                                                                                                                                                                                                                                                                                                                                                                                                                                                                                                                                                                                                                                                                                                                                                                                                                                                                                                                                                                                                                                                                                                                                                                                                                                                                                                                                                                                                                                                                                                                                                                                                                                                                                                                                                                                                                                                                                                                                                                                                                                                                                                                                                                                                                                                                                                                                                                                                                                                                                                                                                                                                                                                                                                                                                                                                                                                                                                                                                                                                                                                                                                                                                                                                                                                                                                                                                                                                                                                                                                                                                                                                                                                                                                                                                                                                                                                                                                                                                                                                                                                                                                                                                                                                                                                                                                                                                                                                                                                                                                                                                                                                                                                                                                                                                                                                                                                                                                                                                                                                                                                                                                                                                                                                                                                                                                                                                                                                                                                                                                                                                                                                                                                                                                                                                                                                                                                                                                                                                                                                                                                                                                                                                                                                                                                                                                                                                                                                                                                                                                                                                                                                           | see above                                              | Manuel J. Santos Hospital                                  | Alethea R. de Guzman; Anna Ong-Lim; Arianne A. Zamora; Benedict A. Maralit; Carlo M. Lapid; Celia Carlos; Cynthia P. Saloma; Devon Ray Pacial; Diomedes A. Carino; Diomedes A. Cariño; Edsel Maurice Salvana; Edsel Maurice Salvaña; El King D. Morado; Elcid Aaron R. Panglinan; Eva Maria Cutiungco-de la Paz; Francis A. Tablizo; Henrietta Marie Rodriguez; Jaime C. Montoya; Jan Michael C. Yap; Jarvin E. Nipales; Jo-Hannah S. Llamas; John Q. Wong; Joshua Gregor A. Dizon; Juan Antonio R. Magalang; Karol Sophia Agape R. Padilla; Kenneth M. Kim; Kris P. Punayan; Kristina Patriz Dela Cruz; Kristina Patriz Dela Cruz; Lindsay Claire D.L. Carandang; Ma. Exanil Plantig; Marc Edsel C. Ayes; Marc Jerrone R. Castro; Maria Rosario Singh-Vergeire; Maria Rosario Singh-Vergeire and Cynthia P. Saloma; Maria Sofia L. Yangzon; Marielle M Gamboa; Marielle M. Gamboa; Marissa Alejandria; Niña Francesca Bustamante; Razel Nikka M. Hao; Renato Jacinto Q. Mantaring; Rianna Patricia S. Cruz; Sheila Mae M. Araiza; Yvonne Valerie Austria; Zipporah Mariebelle R. Enriquez; Zryel V. Mollejon                                                                                                                                      |                                                                                                                                                                                                                                                                                                                                                                                                                                                                                                                                                                                                                                                                                                                                                                                                                                                                                                                                                                                                                                                                                                                                                                                                                                                    |
| EPI_ISL_2105535, EPI_ISL_2107799, EPI_ISL_2156278, EPI_ISL_2156279, EPI_ISL_2156280, EPI_ISL_2156488, EPI_ISL_2156487, EPI_ISL_2156488, EPI_ISL_2156489, EPI_ISL_2156490, EPI_ISL_2156491, EPI_ISL_2156492, EPI_ISL_2156493, EPI_ISL_2156494, EPI_ISL_2156495, EPI_ISL_2156496, EPI_ISL_2156497, EPI_ISL_2156498, EPI_ISL_2156499, EPI_ISL_2156500, EPI_ISL_2156501, EPI_ISL_2156502, EPI_ISL_2156503, EPI_ISL_2156504, EPI_ISL_2156505, EPI_ISL_2156506, EPI_ISL_2156507, EPI_ISL_2156508, EPI_ISL_2156509, EPI_ISL_2156510, EPI_ISL_2156511, EPI_ISL_2156512, EPI_ISL_2156513, EPI_ISL_2156514, EPI_ISL_2156515, EPI_ISL_2156516, EPI_ISL_2156517, EPI_ISL_2156518, EPI_ISL_2156519, EPI_ISL_2156520, EPI_ISL_2156521, EPI_ISL_2156522, EPI_ISL_2156523, EPI_ISL_2156524, EPI_ISL_2156525, EPI_ISL_2156526, EPI_ISL_2156527, EPI_ISL_2156528, EPI_ISL_2156529, EPI_ISL_2156530, EPI_ISL_2156531, EPI_ISL_2156532, EPI_ISL_2156533, EPI_ISL_2156534, EPI_ISL_2156535, EPI_ISL_2156536, EPI_ISL_2156537, EPI_ISL_2156538, EPI_ISL_2156539, EPI_ISL_2156540, EPI_ISL_2156541, EPI_ISL_2156542, EPI_ISL_2156543, EPI_ISL_2156544, EPI_ISL_2156545, EPI_ISL_2156546, EPI_ISL_2156547, EPI_ISL_2156548, EPI_ISL_2156549, EPI_ISL_2156550, EPI_ISL_2156551, EPI_ISL_2156552, EPI_ISL_2156553, EPI_ISL_2156554, EPI_ISL_2156555, EPI_ISL_2156556, EPI_ISL_2156557, EPI_ISL_2156558, EPI_ISL_2156559, EPI_ISL_2156560, EPI_ISL_2156561, EPI_ISL_2156562, EPI_ISL_2156563, EPI_ISL_2156564, EPI_ISL_2156565, EPI_ISL_2156566, EPI_ISL_2156567, EPI_ISL_2156568, EPI_ISL_2156569, EPI_ISL_2156570, EPI_ISL_2156571, EPI_ISL_2156572, EPI_ISL_2156573, EPI_ISL_2156574, EPI_ISL_2156575, EPI_ISL_2156576, EPI_ISL_2156577, EPI_ISL_2156578, EPI_ISL_2156579, EPI_ISL_2156580, EPI_ISL_2156581, EPI_ISL_2156582, EPI_ISL_2156583, EPI_ISL_2156584, EPI_ISL_2156585, EPI_ISL_2156586, EPI_ISL_2156587, EPI_ISL_2156588, EPI_ISL_2156589, EPI_ISL_2156590, EPI_ISL_2156591, EPI_ISL_2156592, EPI_ISL_2156593, EPI_ISL_2156594, EPI_ISL_2156595, EPI_ISL_2156596, EPI_ISL_2156597, EPI_ISL_2156598, EPI_ISL_2156599, EPI_ISL_2156600, EPI_ISL_2156601, EPI_ISL_2156602, EPI_ISL_2156603, EPI_ISL_2156604, EPI_ISL_2156605, EPI_ISL_2156606, EPI_ISL_2156607, EPI_ISL_2156608, EPI_ISL_2156609, EPI_ISL_2156610, EPI_ISL_2156611, EPI_ISL_2156612, EPI_ISL_2156613, EPI_ISL_2156614, EPI_ISL_2156615, EPI_ISL_2156616, EPI_ISL_2156617, EPI_ISL_2156618, EPI_ISL_2156619, EPI_ISL_2156620, EPI_ISL_2156621, EPI_ISL_2156622, EPI_ISL_2156623, EPI_ISL_2156624, EPI_ISL_2156625, EPI_ISL_2156626, EPI_ISL_2156627, EPI_ISL_2156628, EPI_ISL_2156629, EPI_ISL_2156630, EPI_ISL_2156631, EPI_ISL_2156632, EPI_ISL_2156633, EPI_ISL_2156634, EPI_ISL_2156635, EPI_ISL_2156636, EPI_ISL_2156637, EPI_ISL_2156638, EPI_ISL_2156639, EPI_ISL_2156640, EPI_ISL_2156641, EPI_ISL_2156642, EPI_ISL_2156643, EPI_ISL_2156644, EPI_ISL_2156645, EPI_ISL_2156646, EPI_ISL_2156647, EPI_ISL_2156648, EPI_ISL_2156649, EPI_ISL_2156650, EPI_ISL_2156651, EPI_ISL_2156652, EPI_ISL_2156653, EPI_ISL_2156654, EPI_ISL_2156655, EPI_ISL_2156656, EPI_ISL_2156657, EPI_ISL_2156658, EPI_ISL_2156659, EPI_ISL_2156660, EPI_ISL_2156661, EPI_ISL_2156662, EPI_ISL_2156663, EPI_ISL_2156664, EPI_ISL_2156665, EPI_ISL_2156666, EPI_ISL_2156667, EPI_ISL_2156668, EPI_ISL_2156669, EPI_ISL_2156670, EPI_ISL_2156671, EPI_ISL_2156672, EPI_ISL_2156673, EPI_ISL_2156674, EPI_ISL_2156675, EPI_ISL_2156676, EPI_ISL_2156677, EPI_ISL_2156678, EPI_ISL_2156679, EPI_ISL_2156680, EPI_ISL_2156681, EPI_ISL_2156682, EPI_ISL_2156683, EPI_ISL_2156684, EPI_ISL_2156685, EPI_ISL_2156686, EPI_ISL_2156687, EPI_ISL_2156688, EPI_ISL_2156689, EPI_ISL_2156690, EPI_ISL_2156691, EPI_ISL_2156692, EPI_ISL_2156693, EPI_ISL_2156694, EPI_ISL_2156695, EPI_ISL_2156696, EPI_ISL_2156697, EPI_ISL_2156698, EPI_ISL_2156699, EPI_ISL_2156700, EPI_ISL_2156701, EPI_ISL_2156702, EPI_ISL_2156703, EPI_ISL_2156704, EPI_ISL_2156705, EPI_ISL_2156706, EPI_ISL_2156707, EPI_ISL_2156708, EPI_ISL_2156709, EPI_ISL_2156710, EPI_ISL_2156711, EPI_ISL_2156712, EPI_ISL_2156713, EPI_ISL_2156714, EPI_ISL_2156715, EPI_ISL_2156716, EPI_ISL_2156717, EPI_ISL_2156718, EPI_ISL_2156719, EPI_ISL_2156720, EPI_ISL_2156721, EPI_ISL_2156722, EPI_ISL_2156723, EPI_ISL_2156724, EPI_ISL_2156725, EPI_ISL_2156726, EPI_ISL_2156727, EPI_ISL_2156728, EPI_ISL_2156729, EPI_ISL_2156730, EPI_ISL_2156731, EPI_ISL_2156732, EPI_ISL_2156733, EPI_ISL_2156734, EPI_ISL_2156735, EPI_ISL_2156736, EPI_ISL_2156737, EPI_ISL_2156738, EPI_ISL_2156739, EPI_ISL_2156740, EPI_ISL_2156741, EPI_ISL_2156742, EPI_ISL_2156743, EPI_ISL_2156744, EPI_ISL_2156745, EPI_ISL_2156746, EPI_ISL_2156747, EPI_ISL_2156748, EPI_ISL_2156749, EPI_ISL_2156750, EPI_ISL_2156751, EPI_ISL_2156752, EPI_ISL_2156753, EPI_ISL_2156754, EPI_ISL_2156755, EPI_ISL_2156756, EPI_ISL_2156757, EPI_ISL_2156758, EPI_ISL_2156759, EPI_ISL_2156760, EPI_ISL_2156761, EPI_ISL_2156762, EPI_ISL_2156763, EPI_ISL_2156764, EPI_ISL_2156765, EPI_ISL_2156766, EPI_ISL_2156767, EPI_ISL_2156768, EPI_ISL_2156769, EPI_ISL_2156770, EPI_ISL_2156771, EPI_ISL_2156772, EPI_ISL_2156773, EPI_ISL_2156774, EPI_ISL_2156775, EPI_ISL_2156776, EPI_ISL_2156777, EPI_ISL_2156778, EPI_ISL_2156779, EPI_ISL_2156780, EPI_ISL_2156781, EPI_ISL_2156782, EPI_ISL_2156783, EPI_ISL_2156784, EPI_ISL_2156785, EPI_ISL_2156786, EPI_ISL_2156787, EPI_ISL_2156788, EPI_ISL_2156789, EPI_ISL_2156790, EPI_ISL_2156791, EPI_ISL_2156792, EPI_ISL_2156793, EPI_ISL_2156794, EPI_ISL_2156795, EPI_ISL_2156796, EPI_ISL_2156797, EPI_ISL_2156798, EPI_ISL_2156799, EPI_ISL_2156800, EPI_ISL_2156801, EPI_ISL_2156802, EPI_ISL_2156803, EPI_ISL_2156804, EPI_ISL_2156805, EPI_ISL_2156806, EPI_ISL_2156807, EPI_ISL_2156808, EPI_ISL_2156809, EPI_ISL_2156810, EPI_ISL_2156811, EPI_ISL_2156812, EPI_ISL_2156813, EPI_ISL_2156814, EPI_ISL_2156815, EPI_ISL_2156816, EPI_ISL_2156817, EPI_ISL_2156818, EPI_ISL_2156819, EPI_ISL_2156820, EPI_ISL_2156821, EPI_ISL_2156822, EPI_ISL_2156823, EPI_ISL_2156824, EPI_ISL_2156825, EPI_ISL_2156826, EPI_ISL_2156827, EPI_ISL_2156828, EPI_ISL_2156829, EPI_ISL_2156830, EPI_ISL_2156831, EPI_ISL_2156832, EPI_ISL_2156833, EPI_ISL_2156834, EPI_ISL_2156835, EPI_ISL_2156836, EPI_ISL_2156837, EPI_ISL_2156838, EPI_ISL_2156839, EPI_ISL_2156840, EPI_ISL_2156841, EPI_ISL_2156842, EPI_ISL_2156843, EPI_ISL_2156844, EPI_ISL_2156845, EPI_ISL_2156846, EPI_ISL_2156847, EPI_ISL_2156848, EPI_ISL_2156849, EPI_ISL_2156850, EPI_ISL_2156851, EPI_ISL_2156852, EPI_ISL_2156853, EPI_ISL_2156854, EPI_ISL_2156855, EPI_ISL_2156856, EPI_ISL_2156857, EPI_ISL_2156858, EPI_ISL_2156859, EPI_ISL_2156860, EPI_ISL_2156861, EPI_ISL_2156862, EPI_ISL_2156863, EPI_ISL_2156864, EPI_ISL_2156865, EPI_ISL_2156866, EPI_ISL_2156867, EPI_ISL_2156868, EPI_ISL_2156869, EPI_ISL_2156870, EPI_ISL_2156871, EPI_ISL_2156872, EPI_ISL_2156873, EPI_ISL_2156874, EPI_ISL_2156875, EPI_ISL_2156876, EPI_ISL_2156877, EPI_ISL_2156878, EPI_ISL_2156879, EPI_ISL_2156880, EPI_ISL_2156881, EPI_ISL_2156882, EPI_ISL_2156883, EPI_ISL_2156884, EPI_ISL_2156885, EPI_ISL_2156886, EPI_ISL_2156887, EPI_ISL_2156888, EPI_ISL_2156889, EPI_ISL_2156890, EPI_ISL_2156891, EPI_ISL_2156892, EPI_ISL_2156893, EPI_ISL_2156894, EPI_ISL_2156895, EPI_ISL_2156896, EPI_ISL_2156897, EPI_ISL_2156898, EPI_ISL_2156899, EPI_ISL_2156900, EPI_ISL_2156901, EPI_ISL_2156902, EPI_ISL_2156903, EPI_ISL_2156904, EPI_ISL_2156905, EPI_ISL_2156906, EPI_ISL_2156907, EPI_ISL_2156908, EPI_ISL_2156909, EPI_ISL_2156910, EPI_ISL_2156911, EPI_ISL_2156912, EPI_ISL_2156913, EPI_ISL_2156914, EPI_ISL_2156915, EPI_ISL_2156916, EPI_ISL_2156917, EPI_ISL_2156918, EPI_ISL_2156919, EPI_ISL_2156920, EPI_ISL_2156921, EPI_ISL_2156922, EPI_ISL_2156923, EPI_ISL_2156924, EPI_ISL_2156925, EPI_ISL_2156926, EPI_ISL_2156927, EPI_ISL_2156928, EPI_ISL_2156929, EPI_ISL_2156930, EPI_ISL_2156931, EPI_ISL_2156932, EPI_ISL_2156933, EPI_ISL_2156934, EPI_ISL_2156935, EPI_ISL_2156936, EPI_ISL_2156937, EPI_ISL_2156938, EPI_ISL_2156939, EPI_ISL_2156940, EPI_ISL_2156941, EPI_ISL_2156942, EPI_ISL_2156943, EPI_ISL_2156944, EPI_ISL_2156945, EPI_ISL_2156946, EPI_ISL_2156947, EPI_ISL_2156948, EPI_ISL_2156949, EPI_ISL_2156950, EPI_ISL_2156951, EPI_ISL_2156952, EPI_ISL_2156953, EPI_ISL_2156954, EPI_ISL_2156955, EPI_ISL_2156956, EPI_ISL_2156957, EPI_ISL_2156958, EPI_ISL_2156959, EPI_ISL_21 |                                                        |                                                            |                                                                                                                                                                                                                                                                                                                                                                                                                                                                                                                                                                                                                                                                                                                                                                                                                                                                                                                                                                                                                                                                                                                                                                                                                                                    |                                                                                                                                                                                                                                                                                                                                                                                                                                                                                                                                                                                                                                                                                                                                                                                                                                                                                                                                                                                                                                                                                                                                                                                                                                                    |

|                                                                                                                                                                                                                                                                                                                                                                                                                                                                                                                                                                                                                                                                                                                                                           |                                                                     |                                                                |                                                                                                                                                                                                                                                                                                                                                                                                                                                                                                                                                                                                                                                                                                                                                                                                                                                                                                                                                                                                                                                                                           |
|-----------------------------------------------------------------------------------------------------------------------------------------------------------------------------------------------------------------------------------------------------------------------------------------------------------------------------------------------------------------------------------------------------------------------------------------------------------------------------------------------------------------------------------------------------------------------------------------------------------------------------------------------------------------------------------------------------------------------------------------------------------|---------------------------------------------------------------------|----------------------------------------------------------------|-------------------------------------------------------------------------------------------------------------------------------------------------------------------------------------------------------------------------------------------------------------------------------------------------------------------------------------------------------------------------------------------------------------------------------------------------------------------------------------------------------------------------------------------------------------------------------------------------------------------------------------------------------------------------------------------------------------------------------------------------------------------------------------------------------------------------------------------------------------------------------------------------------------------------------------------------------------------------------------------------------------------------------------------------------------------------------------------|
| EPI_ISL_2155678                                                                                                                                                                                                                                                                                                                                                                                                                                                                                                                                                                                                                                                                                                                                           | National Center for Mental Health (PGC)                             | Philippine Genome Center                                       | Alethea R. de Guzman; Anna Ong-Lim; Arianne A. Zamora; Asia Louisa U. Chong; Benedict A. Maralit; Candice Francheska B. Tambaoan; Carlo M. Lapid; Celia Carlos; Devon Ray Pacial; Edsel Maurice Salvaña; El King D. Morado; Eva Maria Cutiongco-de la Paz; Francis A. Tablizo; Irish Coleen A. Asin; Jaime C. Montoya; Jan Michael C. Yap; Jo-Hannah S. Llamas; John Q. Wong; Joshua Gregor A. Dizon; Juan Antonio R. Magalang; Karol Sophia Agape R. Padilla; Kenneth M. Kim; Kris P. Punayan; Marc Edsel C. Ayes; Marc Jerrone R. Castro; Maria Rosario Singh-Vergeire and Cynthia P. Saloma; Maria Sofia L. Yangzon; Marissa Alejandria; Razel Nikka M. Hao; Rianna Patricia S. Cruz; Sheila Mae M. Araiza                                                                                                                                                                                                                                                                                                                                                                             |
| EPI_ISL_434554, EPI_ISL_434555, EPI_ISL_434556, EPI_ISL_434557, EPI_ISL_434558                                                                                                                                                                                                                                                                                                                                                                                                                                                                                                                                                                                                                                                                            | National Institutes of Health, University of the Philippines Manila | Philippine Genome Center                                       | Alessandra C. Sanchez; Benedict A. Maralit; Bernard Demot; Carlo M. Lapid; Christina Tan; El King D. Morado; Eva Maria Cutiongco-de la Paz; Francis A. Tablizo; Haifa L.Gaza; Jan Michael C. Yap; Jarvin E. Nipales; Jo-Hannah S. Llamas; John Mark Velasco; Joshua Gregor A. Dizon; Joy Ann Petronio-Santos; Julius Aaron Mejia; Kris P. Punayan; Kristianne Arielle D. Gabriel; Maribell Dollete; Marissa M. Alejandria; Raul V. Destura; Shana F. Genavia; Shebna Rose D. Fabilloren; Shiela Mae M. Araiza; Sonia Salamat; and Cynthia P. Saloma                                                                                                                                                                                                                                                                                                                                                                                                                                                                                                                                       |
| EPI_ISL_431833                                                                                                                                                                                                                                                                                                                                                                                                                                                                                                                                                                                                                                                                                                                                            | National Institutes of Health, University of the Philippines Manila | Philippine Genome Center, University of the Philippines System | Alessandra C. Sanchez; Benedict A. Maralit; Bernard Demot; Carlo M. Lapid; Christina Tan; El King D. Morado; Eva Maria Cutiongco-de la Paz; Francis A. Tablizo; Haifa L.Gaza; Jan Michael C. Yap; Jarvin E. Nipales; Jo-Hannah S. Llamas; John Mark Velasco; Joshua Gregor A. Dizon; Joy Ann Petronio-Santos; Julius Aaron Mejia; Kris P. Punayan; Kristianne Arielle D. Gabriel; Maribell Dollete; Marissa M. Alejandria; Raul V. Destura; Shana F. Genavia; Shebna Rose D. Fabilloren; Shiela Mae M. Araiza; Sonia Salamat; and Cynthia P. Saloma                                                                                                                                                                                                                                                                                                                                                                                                                                                                                                                                       |
| EPI_ISL_833332                                                                                                                                                                                                                                                                                                                                                                                                                                                                                                                                                                                                                                                                                                                                            | National Jail Management and Penology Training Institute            | Research Institute for Tropical Medicine                       | Catalino Demetria; Daria Manalo; Edelwisa Mercado; Francisco Gerardo Polotan; Hannah Leah Morito; Inez Andrea Medado; John Leonard Chan; Kirstyn Brunker; Ma Angelica Tujan; Othoniel Jan Onza                                                                                                                                                                                                                                                                                                                                                                                                                                                                                                                                                                                                                                                                                                                                                                                                                                                                                            |
| EPI_ISL_2155663, EPI_ISL_2156517, EPI_ISL_2156518, EPI_ISL_2156606, EPI_ISL_2171098, EPI_ISL_2171208, EPI_ISL_2188077, EPI_ISL_2188159, EPI_ISL_2188753, EPI_ISL_2188845, EPI_ISL_2188851, EPI_ISL_2188879, EPI_ISL_2188922, EPI_ISL_2189131, EPI_ISL_2189297, EPI_ISL_2189403, EPI_ISL_2189458, EPI_ISL_2859514, EPI_ISL_2859560, EPI_ISL_2859618                                                                                                                                                                                                                                                                                                                                                                                                        | see above                                                           | National Kidney and Transplant Institute (NKT)                 | Alethea R. de Guzman; Anna Ong-Lim; Arianne A. Zamora; Asia Louisa U. Chong; Benedict A. Maralit; Candice Francheska B. Tambaoan; Carlo M. Lapid; Celia Carlos; Devon Ray Pacial; Diomedes A. Carino; Edsel Maurice Salvaña; El King D. Morado; Elcid Aaron R. Panglinan; Eva Maria Cutiongco-de la Paz; Francis A. Tablizo; Henrietta Marie Rodriguez; Irish Coleen A. Asin; Jaime C. Montoya; Jan Michael C. Yap; Jarvin E. Nipales; Jo-Hannah S. Llamas; John Q. Wong; Joshua Gregor A. Dizon; Juan Antonio R. Magalang; Karol Sophia Agape R. Padilla; Kenneth M. Kim; Kris P. Punayan; Kristina Patriz Dela Cruz; Lindsay Claire D.L. Carandang; Ma. Exanil Planting; Marc Edsel C. Ayes; Marc Jerrone R. Castro; Maria Rosario Singh-Vergeire and Cynthia P. Saloma; Maria Sofia L. Yangzon; Marielle M Gamboa; Marissa Alejandria; Nina Francesca Bustamante; Razel Nikka M. Hao; Renato Jacinto Q. Mantaring; Rianna Patricia S. Cruz; Sheila Mae M. Araiza; Yvonne Valerie Austria; Zipporah Mariebelle R. Enriquez; Zyrel V. Mollejon                                           |
| EPI_ISL_1213571, EPI_ISL_1213573, EPI_ISL_2105398, EPI_ISL_2105399, EPI_ISL_2105400, EPI_ISL_2105403, EPI_ISL_2105404, EPI_ISL_2105407, EPI_ISL_2105408, EPI_ISL_2105410, EPI_ISL_2105412, EPI_ISL_2105413, EPI_ISL_2105415, EPI_ISL_2105416, EPI_ISL_2105417, EPI_ISL_2105419, EPI_ISL_2105422, EPI_ISL_2105423, EPI_ISL_2105426, EPI_ISL_2105427, EPI_ISL_2105430, EPI_ISL_2105431, EPI_ISL_2105435, EPI_ISL_2105437, EPI_ISL_2105438, EPI_ISL_2105439, EPI_ISL_2105441, EPI_ISL_2105443, EPI_ISL_2105444, EPI_ISL_2105445, EPI_ISL_2105447, EPI_ISL_2105450, EPI_ISL_2105451, EPI_ISL_2105452, EPI_ISL_2105454, EPI_ISL_2105457, EPI_ISL_2105458, EPI_ISL_2107794, EPI_ISL_2107796, EPI_ISL_2107797, EPI_ISL_2155195, EPI_ISL_2155270, EPI_ISL_2155327 | see above                                                           | Negros Oriental Provincial Hospital                            | Alethea R. de Guzman; Anna Ong-Lim; Arianne A. Zamora; Asia Louisa U. Chong; Benedict A. Maralit; Candice Francheska B. Tambaoan; Carlo M. Lapid; Celia Carlos; Devon Ray Pacial; Edsel Maurice Salvaña; El King D. Morado; Eva Maria Cutiongco-de la Paz; Francis A. Tablizo; Irish Coleen A. Asin; Jaime C. Montoya; Jan Michael C. Yap; Jo-Hannah S. Llamas; John Q. Wong; Joshua Gregor A. Dizon; Juan Antonio R. Magalang; Karol Sophia Agape R. Padilla; Kenneth M. Kim; Kris P. Punayan; Marc Edsel C. Ayes; Marc Jerrone R. Castro; Maria Rosario Singh-Vergeire and Cynthia P. Saloma; Maria Sofia L. Yangzon; Marissa Alejandria; Razel Nikka M. Hao; Renato Jacinto Q. Mantaring; Rianna Patricia S. Cruz; Sheila Mae M. Araiza                                                                                                                                                                                                                                                                                                                                                |
| EPI_ISL_2105401, EPI_ISL_2105539, EPI_ISL_2105554, EPI_ISL_2105556, EPI_ISL_2105561, EPI_ISL_2156185, EPI_ISL_2156186, EPI_ISL_2156187, EPI_ISL_2156402, EPI_ISL_2156485, EPI_ISL_2156486, EPI_ISL_2156584, EPI_ISL_2156585, EPI_ISL_2156591, EPI_ISL_2156592, EPI_ISL_2156593, EPI_ISL_2189113, EPI_ISL_2189152, EPI_ISL_2189187, EPI_ISL_2189255, EPI_ISL_2189279, EPI_ISL_2189350, EPI_ISL_4712038, EPI_ISL_4712177, EPI_ISL_4713956, EPI_ISL_4714619, EPI_ISL_4714952, EPI_ISL_4715078, EPI_ISL_4715093, EPI_ISL_4715113, EPI_ISL_4715132, EPI_ISL_4715318                                                                                                                                                                                            | see above                                                           | Northern Mindanao TB Regional Center                           | Alethea R. de Guzman; Anna Ong-Lim; Arianne A. Zamora; Asia Louisa U. Chong; Benedict A. Maralit; Candice Francheska B. Tambaoan; Carlo M. Lapid; Celia Carlos; Cynthia P. Saloma; Devon Ray Pacial; Diomedes A. Cariño; Edsel Maurice Salvana; Edsel Maurice Salvaña; El King D. Morado; Elcid Aaron R. Panglinan; Eva Maria Cutiongco-de la Paz; Francis A. Tablizo; Henrietta Marie Rodriguez; Irish Coleen A. Asin; Jaime C. Montoya; Jan Michael C. Yap; Jarvin E. Nipales; Jo-Hannah S. Llamas; John Q. Wong; Joshua Gregor A. Dizon; Juan Antonio R. Magalang; Karol Sophia Agape R. Padilla; Kenneth M. Kim; Kris P. Punayan; Kristina Patriz Dela Cruz; Lindsay Claire D.L. Carandang; Ma. Exanil Planting; Marc Edsel C. Ayes; Marc Jerrone R. Castro; Maria Rosario Singh-Vergeire and Cynthia P. Saloma; Maria Sofia L. Yangzon; Marielle M Gamboa; Marissa Alejandria; Nina Francesca Bustamante; Razel Nikka M. Hao; Renato Jacinto Q. Mantaring; Rianna Patricia S. Cruz; Sheila Mae M. Araiza; Yvonne Valerie Austria; Zipporah Mariebelle R. Enriquez; Zyrel V. Mollejon |
| EPI_ISL_4459433, EPI_ISL_4459486                                                                                                                                                                                                                                                                                                                                                                                                                                                                                                                                                                                                                                                                                                                          | ODIONGAN RURAL HEALTH UNIT                                          | Research Institute for Tropical Medicine/Tohoku University     | Allen Anthony Laraño; Ardiane Ysabelle Dolor; Catalino Demetria; Clyde Dapát; Emmanuel Kagning Tsinda; Francisco Gerardo Polotan; Hitoshi Oshitani; Inez Andrea Medado; Jefferson Earl Halog; Lei Lanna Dancel; Leilanie Nacion; Ma. Angelica Tujan; Machiko Okamoto; Maria Carmen Corpuz; Mariko Siato-Obata; Mayuko Saito                                                                                                                                                                                                                                                                                                                                                                                                                                                                                                                                                                                                                                                                                                                                                               |
| EPI_ISL_4459306, EPI_ISL_4459436, EPI_ISL_4459522                                                                                                                                                                                                                                                                                                                                                                                                                                                                                                                                                                                                                                                                                                         | OLIVAREZ GENERAL HOSPITAL                                           | Research Institute for Tropical Medicine/Tohoku University     | Allen Anthony Laraño; Ardiane Ysabelle Dolor; Catalino Demetria; Clyde Dapát; Emmanuel Kagning Tsinda; Francisco Gerardo Polotan; Hitoshi Oshitani; Inez Andrea Medado; Jefferson Earl Halog; Lei Lanna Dancel; Leilanie Nacion; Ma. Angelica Tujan; Machiko Okamoto; Maria Carmen Corpuz; Mariko Siato-Obata; Mayuko Saito                                                                                                                                                                                                                                                                                                                                                                                                                                                                                                                                                                                                                                                                                                                                                               |
| EPI_ISL_4459499                                                                                                                                                                                                                                                                                                                                                                                                                                                                                                                                                                                                                                                                                                                                           | ORIENTAL MINDORO SOUTHERN DISTRICT HOSPITAL                         | Research Institute for Tropical Medicine/Tohoku University     | Allen Anthony Laraño; Ardiane Ysabelle Dolor; Catalino Demetria; Clyde Dapát; Emmanuel Kagning Tsinda; Francisco Gerardo Polotan; Hitoshi Oshitani; Inez Andrea Medado; Jefferson Earl Halog; Lei Lanna Dancel; Leilanie Nacion; Ma. Angelica Tujan; Machiko Okamoto; Maria Carmen Corpuz; Mariko Siato-Obata; Mayuko Saito                                                                                                                                                                                                                                                                                                                                                                                                                                                                                                                                                                                                                                                                                                                                                               |
| EPI_ISL_4459465                                                                                                                                                                                                                                                                                                                                                                                                                                                                                                                                                                                                                                                                                                                                           | OSPITAL NG LIPA                                                     | Research Institute for Tropical Medicine/Tohoku University     | Allen Anthony Laraño; Ardiane Ysabelle Dolor; Catalino Demetria; Clyde Dapát; Emmanuel Kagning Tsinda; Francisco Gerardo Polotan; Hitoshi Oshitani; Inez Andrea Medado; Jefferson Earl Halog; Lei Lanna Dancel; Leilanie Nacion; Ma. Angelica Tujan; Machiko Okamoto; Maria Carmen Corpuz; Mariko Siato-Obata; Mayuko Saito                                                                                                                                                                                                                                                                                                                                                                                                                                                                                                                                                                                                                                                                                                                                                               |
| EPI_ISL_2188053, EPI_ISL_2188249                                                                                                                                                                                                                                                                                                                                                                                                                                                                                                                                                                                                                                                                                                                          | OSPITAL NG MUNTINLUPA                                               | Philippine Genome Center                                       | Alethea R. de Guzman; Anna Ong-Lim; Arianne A. Zamora; Asia Louisa U. Chong; Benedict A. Maralit; Candice Francheska B. Tambaoan; Carlo M. Lapid; Celia Carlos; Devon Ray Pacial; Edsel Maurice Salvaña; El King D. Morado; Elcid Aaron R. Panglinan; Eva Maria Cutiongco-de la Paz; Francis A. Tablizo; Irish Coleen A. Asin; Jaime C. Montoya; Jan Michael C. Yap; Jo-Hannah S. Llamas; John Q. Wong; Joshua Gregor A. Dizon; Juan Antonio R. Magalang; Karol Sophia Agape R. Padilla; Kenneth M. Kim; Kris P. Punayan; Marc Edsel C. Ayes; Marc Jerrone R. Castro; Maria Rosario Singh-Vergeire and Cynthia P. Saloma; Maria Sofia L. Yangzon; Marissa Alejandria; Razel Nikka M. Hao; Rianna Patricia S. Cruz; Sheila Mae M. Araiza                                                                                                                                                                                                                                                                                                                                                   |
| EPI_ISL_4459384, EPI_ISL_4459394, EPI_ISL_4459501                                                                                                                                                                                                                                                                                                                                                                                                                                                                                                                                                                                                                                                                                                         | OSPITAL NG PARAÑAQUE                                                | Research Institute for Tropical Medicine/Tohoku University     | Allen Anthony Laraño; Ardiane Ysabelle Dolor; Catalino Demetria; Clyde Dapát; Emmanuel Kagning Tsinda; Francisco Gerardo Polotan; Hitoshi Oshitani; Inez Andrea Medado; Jefferson Earl Halog; Lei Lanna Dancel; Leilanie Nacion; Ma. Angelica Tujan; Machiko Okamoto; Maria Carmen Corpuz; Mariko Siato-Obata; Mayuko Saito                                                                                                                                                                                                                                                                                                                                                                                                                                                                                                                                                                                                                                                                                                                                                               |
| EPI_ISL_4459423                                                                                                                                                                                                                                                                                                                                                                                                                                                                                                                                                                                                                                                                                                                                           | OTHERS - BALAYAN RURAL HEALTH UNIT                                  | Research Institute for Tropical Medicine/Tohoku University     | Allen Anthony Laraño; Ardiane Ysabelle Dolor; Catalino Demetria; Clyde Dapát; Emmanuel Kagning Tsinda; Francisco Gerardo Polotan; Hitoshi Oshitani; Inez Andrea Medado; Jefferson Earl Halog; Lei Lanna Dancel; Leilanie Nacion; Ma. Angelica Tujan; Machiko Okamoto; Maria Carmen Corpuz; Mariko Siato-Obata; Mayuko Saito                                                                                                                                                                                                                                                                                                                                                                                                                                                                                                                                                                                                                                                                                                                                                               |
| EPI_ISL_4459495                                                                                                                                                                                                                                                                                                                                                                                                                                                                                                                                                                                                                                                                                                                                           | OTHERS - CHD REGION 4B                                              | Research Institute for Tropical Medicine/Tohoku University     | Allen Anthony Laraño; Ardiane Ysabelle Dolor; Catalino Demetria; Clyde Dapát; Emmanuel Kagning Tsinda; Francisco Gerardo Polotan; Hitoshi Oshitani; Inez Andrea Medado; Jefferson Earl Halog; Lei Lanna Dancel; Leilanie Nacion; Ma. Angelica Tujan; Machiko Okamoto; Maria Carmen Corpuz; Mariko Siato-Obata; Mayuko Saito                                                                                                                                                                                                                                                                                                                                                                                                                                                                                                                                                                                                                                                                                                                                                               |
| EPI_ISL_4459381                                                                                                                                                                                                                                                                                                                                                                                                                                                                                                                                                                                                                                                                                                                                           | OTHERS - FILINVEST TENT COVID QUARANTINE FACILITY                   | Research Institute for Tropical Medicine/Tohoku University     | Allen Anthony Laraño; Ardiane Ysabelle Dolor; Catalino Demetria; Clyde Dapát; Emmanuel Kagning Tsinda; Francisco Gerardo Polotan; Hitoshi Oshitani; Inez Andrea Medado; Jefferson Earl Halog; Lei Lanna Dancel; Leilanie Nacion; Ma. Angelica Tujan; Machiko Okamoto; Maria Carmen Corpuz; Mariko Siato-Obata; Mayuko Saito                                                                                                                                                                                                                                                                                                                                                                                                                                                                                                                                                                                                                                                                                                                                                               |
| EPI_ISL_4459339                                                                                                                                                                                                                                                                                                                                                                                                                                                                                                                                                                                                                                                                                                                                           | OTHERS - MARTIN MARASIGAN MEMORIAL DISTRICT HOSPITAL                | Research Institute for Tropical Medicine/Tohoku University     | Allen Anthony Laraño; Ardiane Ysabelle Dolor; Catalino Demetria; Clyde Dapát; Emmanuel Kagning Tsinda; Francisco Gerardo Polotan; Hitoshi Oshitani; Inez Andrea Medado; Jefferson Earl Halog; Lei Lanna Dancel; Leilanie Nacion; Ma. Angelica Tujan; Machiko Okamoto; Maria Carmen Corpuz; Mariko Siato-Obata; Mayuko Saito                                                                                                                                                                                                                                                                                                                                                                                                                                                                                                                                                                                                                                                                                                                                                               |
| EPI_ISL_4459289                                                                                                                                                                                                                                                                                                                                                                                                                                                                                                                                                                                                                                                                                                                                           | OTHERS - OSPITAL NG PARAÑAQUE DISTRICT II                           | Research Institute for Tropical Medicine/Tohoku University     | Allen Anthony Laraño; Ardiane Ysabelle Dolor; Catalino Demetria; Clyde Dapát; Emmanuel Kagning Tsinda; Francisco Gerardo Polotan; Hitoshi Oshitani; Inez Andrea Medado; Jefferson Earl Halog; Lei Lanna Dancel; Leilanie Nacion; Ma. Angelica Tujan; Machiko Okamoto; Maria Carmen Corpuz; Mariko Siato-Obata; Mayuko Saito                                                                                                                                                                                                                                                                                                                                                                                                                                                                                                                                                                                                                                                                                                                                                               |
| EPI_ISL_4459462                                                                                                                                                                                                                                                                                                                                                                                                                                                                                                                                                                                                                                                                                                                                           | OTHERS - TAMAUAN CITY HEALTH OFFICE                                 | Research Institute for Tropical Medicine/Tohoku University     | Allen Anthony Laraño; Ardiane Ysabelle Dolor; Catalino Demetria; Clyde Dapát; Emmanuel Kagning Tsinda; Francisco Gerardo Polotan; Hitoshi Oshitani; Inez Andrea Medado; Jefferson Earl Halog; Lei Lanna Dancel; Leilanie Nacion; Ma. Angelica Tujan; Machiko Okamoto; Maria Carmen Corpuz; Mariko Siato-Obata; Mayuko Saito                                                                                                                                                                                                                                                                                                                                                                                                                                                                                                                                                                                                                                                                                                                                                               |
| EPI_ISL_2188997                                                                                                                                                                                                                                                                                                                                                                                                                                                                                                                                                                                                                                                                                                                                           | Occidental Mindoro Provincial Hospital                              | Philippine Genome Center                                       | Alethea R. de Guzman; Anna Ong-Lim; Arianne A. Zamora; Asia Louisa U. Chong; Benedict A. Maralit; Candice Francheska B. Tambaoan; Carlo M. Lapid; Celia Carlos; Devon Ray Pacial; Edsel Maurice Salvaña; El King D. Morado; Elcid Aaron R. Panglinan; Eva Maria Cutiongco-de la Paz; Francis A. Tablizo; Irish Coleen A. Asin; Jaime C. Montoya; Jan Michael C. Yap; Jo-Hannah S. Llamas; John Q. Wong; Joshua Gregor A. Dizon; Juan Antonio R. Magalang; Karol Sophia Agape R. Padilla; Kenneth M. Kim; Kris P. Punayan; Marc Edsel C. Ayes; Marc Jerrone R. Castro; Maria Rosario Singh-Vergeire and Cynthia P. Saloma; Maria Sofia L. Yangzon; Marissa Alejandria; Razel Nikka M. Hao; Renato Jacinto Q. Mantaring; Rianna Patricia S. Cruz; Sheila Mae M. Araiza                                                                                                                                                                                                                                                                                                                      |
| EPI_ISL_3105865                                                                                                                                                                                                                                                                                                                                                                                                                                                                                                                                                                                                                                                                                                                                           | Olivarez General Hospital                                           | Research Institute for Tropical Medicine                       | Clyde Dapát; Deana Mae Ocampo; Emmanuel Kagning Tsinda; Francisco Gerardo Polotan; Hitoshi Oshitani; Inez Andrea Medado; Jefferson Earl Halog; Joana Ina Manalo; Lei Lanna Dancel; Ma Angelica Tujan; Mariko Saito-Obata; Mayuko Saito; Michiko Okamoto; Samantha Louise Bado                                                                                                                                                                                                                                                                                                                                                                                                                                                                                                                                                                                                                                                                                                                                                                                                             |
| EPI_ISL_2859615, EPI_ISL_2859703, EPI_ISL_2859840, EPI_ISL_2859881                                                                                                                                                                                                                                                                                                                                                                                                                                                                                                                                                                                                                                                                                        | Oriental Mindoro Provincial Hospital                                | Philippine Genome Center                                       | Alethea R. de Guzman; Anna Ong-Lim; Arianne A. Zamora; Benedict A. Maralit; Carlo M. Lapid; Celia Carlos; Devon Ray Pacial; Diomedes A. Carino; Edsel Maurice Salvaña; El King D. Morado; Elcid Aaron R. Panglinan; Eva Maria Cutiongco-de la Paz; Francis A. Tablizo; Henrietta Marie Rodriguez; Jaime C. Montoya; Jan Michael C. Yap; Jarvin E. Nipales; Jo-Hannah S. Llamas; John Q. Wong; Joshua Gregor A. Dizon; Juan Antonio R. Magalang; Karol Sophia Agape R. Padilla; Kenneth M. Kim; Kris P. Punayan; Kristina Patriz Dela Cruz; Lindsay Claire D.L. Carandang; Ma. Exanil Planting; Marc Edsel C. Ayes; Maria Rosario Singh-Vergeire and Cynthia P. Saloma; Maria Sofia L. Yangzon; Marielle M Gamboa; Marissa Alejandria; Nina Francesca Bustamante; Razel Nikka M. Hao; Renato Jacinto Q. Mantaring; Rianna Patricia S. Cruz; Sheila Mae M. Araiza; Yvonne Valerie Austria; Zipporah Mariebelle R. Enriquez; Zyrel V. Mollejon                                                                                                                                               |
| EPI_ISL_3105878                                                                                                                                                                                                                                                                                                                                                                                                                                                                                                                                                                                                                                                                                                                                           | Osital ng Biñan                                                     | Research Institute for Tropical Medicine                       | Clyde Dapát; Deana Mae Ocampo; Emmanuel Kagning Tsinda; Francisco Gerardo Polotan; Hitoshi Oshitani; Inez Andrea Medado; Jefferson Earl Halog; Joana Ina Manalo; Lei Lanna Dancel; Ma Angelica Tujan; Mariko Saito-Obata; Mayuko Saito; Michiko Okamoto; Samantha Louise Bado                                                                                                                                                                                                                                                                                                                                                                                                                                                                                                                                                                                                                                                                                                                                                                                                             |
| EPI_ISL_2155701, EPI_ISL_2155702, EPI_ISL_2156368, EPI_ISL_2156394, EPI_ISL_2171224, EPI_ISL_2188038, EPI_ISL_2188042, EPI_ISL_2188076, EPI_ISL_2188093, EPI_ISL_2188101, EPI_ISL_2188148, EPI_ISL_2188219, EPI_ISL_2188675, EPI_ISL_2188676, EPI_ISL_2188690, EPI_ISL_2188748, EPI_ISL_2188815, EPI_ISL_2859500, EPI_ISL_2859506, EPI_ISL_2859681, EPI_ISL_2859732, EPI_ISL_2859740, EPI_ISL_2859756, EPI_ISL_2859906, EPI_ISL_2859971, EPI_ISL_2860004, EPI_ISL_2860159, EPI_ISL_2860161, EPI_ISL_2860194, EPI_ISL_2860205, EPI_ISL_2860241, EPI_ISL_4714336, EPI_ISL_4715252, EPI_ISL_4715331, EPI_ISL_4715344                                                                                                                                         | see above                                                           | Osital ng Imus                                                 | Alethea R. de Guzman; Anna Ong-Lim; Arianne A. Zamora; Asia Louisa U. Chong; Benedict A. Maralit; Candice Francheska B. Tambaoan; Carlo M. Lapid; Celia Carlos; Cynthia P. Saloma; Devon Ray Pacial; Diomedes A. Carino; Diomedes A. Cariño; Edsel Maurice Salvana; Edsel Maurice Salvaña; El King D. Morado; Elcid Aaron R. Panglinan; Eva Maria Cutiongco-de la Paz; Francis A. Tablizo; Henrietta Marie Rodriguez; Jaime C. Montoya; Jan Michael C. Yap; Jarvin E. Nipales; Jo-Hannah S. Llamas; John Q. Wong; Joshua Gregor A. Dizon; Juan Antonio R. Magalang; Karol Sophia Agape R. Padilla; Kenneth M. Kim; Kris P. Punayan; Kristina Patriz Dela Cruz; Lindsay Claire D.L. Carandang; Ma. Exanil Planting; Marc Edsel C. Ayes; Maria Rosario Singh-Vergeire and Cynthia P. Saloma; Maria Sofia L. Yangzon; Marielle M Gamboa; Marissa Alejandria; Nina Francesca Bustamante; Rianna Patricia S. Cruz; Sheila Mae M. Araiza; Yvonne Valerie Austria; Zipporah Mariebelle R. Enriquez; Zyrel V. Mollejon                                                                            |
| EPI_ISL_1069184                                                                                                                                                                                                                                                                                                                                                                                                                                                                                                                                                                                                                                                                                                                                           | Osital ng Lipa                                                      | Research Institute for Tropical Medicine                       | Catalino Demetria; Daria Manalo; Edelwisa Mercado; Francisco Gerardo Polotan; Hannah Leah Morito; Inez Andrea Medado; John Leonard Chan; Joseph Hughes; Kirstyn Brunker; Ma Angelica Tujan; Othoniel Jan Onza                                                                                                                                                                                                                                                                                                                                                                                                                                                                                                                                                                                                                                                                                                                                                                                                                                                                             |

|                                                                                                                                                                                                                                                                                                                                                                                                                                                                                                                                                                                                                                                                                                                                                                                                                                                                                                                                                                                                                                                                                                                                                                                                                                                                                                                                                                                                                                                                                                                                                                                                                                                                                                                                                                                                                                                                                                                                                                                                                                                                                                                                                                                                                                                                                                                                                                                                                                                                                                                                                                                                                                                                                                                                                                                                                                                                                                                                                                                                                                                                                                                                                                                                                                                                                                                                                                                                                                                                                                                                                                                                            |                                       |                                                            |                                                                                                                                                                                                                                                                                                                                                                                                                                                                                                                                                                                                                                                                                                                                                                      |
|------------------------------------------------------------------------------------------------------------------------------------------------------------------------------------------------------------------------------------------------------------------------------------------------------------------------------------------------------------------------------------------------------------------------------------------------------------------------------------------------------------------------------------------------------------------------------------------------------------------------------------------------------------------------------------------------------------------------------------------------------------------------------------------------------------------------------------------------------------------------------------------------------------------------------------------------------------------------------------------------------------------------------------------------------------------------------------------------------------------------------------------------------------------------------------------------------------------------------------------------------------------------------------------------------------------------------------------------------------------------------------------------------------------------------------------------------------------------------------------------------------------------------------------------------------------------------------------------------------------------------------------------------------------------------------------------------------------------------------------------------------------------------------------------------------------------------------------------------------------------------------------------------------------------------------------------------------------------------------------------------------------------------------------------------------------------------------------------------------------------------------------------------------------------------------------------------------------------------------------------------------------------------------------------------------------------------------------------------------------------------------------------------------------------------------------------------------------------------------------------------------------------------------------------------------------------------------------------------------------------------------------------------------------------------------------------------------------------------------------------------------------------------------------------------------------------------------------------------------------------------------------------------------------------------------------------------------------------------------------------------------------------------------------------------------------------------------------------------------------------------------------------------------------------------------------------------------------------------------------------------------------------------------------------------------------------------------------------------------------------------------------------------------------------------------------------------------------------------------------------------------------------------------------------------------------------------------------------------------|---------------------------------------|------------------------------------------------------------|----------------------------------------------------------------------------------------------------------------------------------------------------------------------------------------------------------------------------------------------------------------------------------------------------------------------------------------------------------------------------------------------------------------------------------------------------------------------------------------------------------------------------------------------------------------------------------------------------------------------------------------------------------------------------------------------------------------------------------------------------------------------|
| EPI_ISL_3105873, EPI_ISL_3105874, EPI_ISL_3105884                                                                                                                                                                                                                                                                                                                                                                                                                                                                                                                                                                                                                                                                                                                                                                                                                                                                                                                                                                                                                                                                                                                                                                                                                                                                                                                                                                                                                                                                                                                                                                                                                                                                                                                                                                                                                                                                                                                                                                                                                                                                                                                                                                                                                                                                                                                                                                                                                                                                                                                                                                                                                                                                                                                                                                                                                                                                                                                                                                                                                                                                                                                                                                                                                                                                                                                                                                                                                                                                                                                                                          | Osipal ng Makati                      | Research Institute for Tropical Medicine                   | Clyde Dapac; Deana Mae Ocampo; Emmanuel Kagning Tsinda; Francisco Gerardo Polotan; Hitoshi Oshitani; Inez Andrea Medado; Jefferson Earl Halog; Joana Ina Manalo; Lei Lanna Dancel; Ma Angelica Tujan; Mariko Saito-Obata; Mayuko Saito; Michiko Okamoto; Samantha Louise Bado                                                                                                                                                                                                                                                                                                                                                                                                                                                                                        |
| EPI_ISL_2171150, EPI_ISL_2171162, EPI_ISL_2171170, EPI_ISL_2171183, EPI_ISL_2188067, EPI_ISL_2188106, EPI_ISL_2188117, EPI_ISL_2188191, EPI_ISL_2188707, EPI_ISL_2189058, EPI_ISL_2189295                                                                                                                                                                                                                                                                                                                                                                                                                                                                                                                                                                                                                                                                                                                                                                                                                                                                                                                                                                                                                                                                                                                                                                                                                                                                                                                                                                                                                                                                                                                                                                                                                                                                                                                                                                                                                                                                                                                                                                                                                                                                                                                                                                                                                                                                                                                                                                                                                                                                                                                                                                                                                                                                                                                                                                                                                                                                                                                                                                                                                                                                                                                                                                                                                                                                                                                                                                                                                  | see above                             | Osipal ng Parangal                                         |                                                                                                                                                                                                                                                                                                                                                                                                                                                                                                                                                                                                                                                                                                                                                                      |
| EPI_ISL_4459440                                                                                                                                                                                                                                                                                                                                                                                                                                                                                                                                                                                                                                                                                                                                                                                                                                                                                                                                                                                                                                                                                                                                                                                                                                                                                                                                                                                                                                                                                                                                                                                                                                                                                                                                                                                                                                                                                                                                                                                                                                                                                                                                                                                                                                                                                                                                                                                                                                                                                                                                                                                                                                                                                                                                                                                                                                                                                                                                                                                                                                                                                                                                                                                                                                                                                                                                                                                                                                                                                                                                                                                            | PALUAN COMMUNITY HOSPITAL             | Research Institute for Tropical Medicine/Tohoku University | Allen Anthony Laraño; Ardiane Ysabelle Dolor; Catalino Demetria; Clyde Dapac; Emmanuel Kagning Tsinda; Francisco Gerardo Polotan; Hitoshi Oshitani; Inez Andrea Medado; Jefferson Earl Halog; Lei Lanna Dancel; Lellanie Nacion; Ma. Angelica Tujan; Machiko Okamoto; Maria Carmen Corpuz; Mariko Siato-Obata; Mayuko Saito                                                                                                                                                                                                                                                                                                                                                                                                                                          |
| EPI_ISL_2171219                                                                                                                                                                                                                                                                                                                                                                                                                                                                                                                                                                                                                                                                                                                                                                                                                                                                                                                                                                                                                                                                                                                                                                                                                                                                                                                                                                                                                                                                                                                                                                                                                                                                                                                                                                                                                                                                                                                                                                                                                                                                                                                                                                                                                                                                                                                                                                                                                                                                                                                                                                                                                                                                                                                                                                                                                                                                                                                                                                                                                                                                                                                                                                                                                                                                                                                                                                                                                                                                                                                                                                                            | PARKWAY MEDICAL AND DIAGNOSTIC CENTER | Philippine Genome Center                                   | Alethea R. de Guzman; Anna Ong-Lim; Arianne A. Zamora; Asia Louisa U. Chong; Benedict A. Maralit; Candice Francheska B. Tambaoan; Carlo M. Lapid; Celia Carlos; Devon Ray Pacial; Edsel Maurice Salvaña; El King D. Morado; Elcid Aaron R. Panglinan; Eva Maria Cutiongco-de la Paz; Francis A. Tablizo; Irish Coleen A. Asin; Jaime C. Montoya; Jan Michael C. Yap; Jo-Hannah S. Llamas; John Q. Wong; Joshua Gregor A. Dizon; Juan Antonio R. Magalang; Karol Sophia Agape R. Padilla; Kenneth M. Kim; Kris P. Punayan; Marc Edsel C. Ayes; Marc Jerrone R. Castro; Maria Rosario Singh-Vergeire and Cynthia P. Saloma; Maria Sofia L. Yangzon; Marissa Alejandria; Razel Nikka M. Hao; Renato Jacinto Q. Mantaring; Rianna Patricia S. Cruz; Sheila Mae M. Araiza |
| EPI_ISL_2188100, EPI_ISL_2188124, EPI_ISL_2188140, EPI_ISL_2188158, EPI_ISL_2188220, EPI_ISL_2188703, EPI_ISL_2188776, EPI_ISL_2188796, EPI_ISL_2188804                                                                                                                                                                                                                                                                                                                                                                                                                                                                                                                                                                                                                                                                                                                                                                                                                                                                                                                                                                                                                                                                                                                                                                                                                                                                                                                                                                                                                                                                                                                                                                                                                                                                                                                                                                                                                                                                                                                                                                                                                                                                                                                                                                                                                                                                                                                                                                                                                                                                                                                                                                                                                                                                                                                                                                                                                                                                                                                                                                                                                                                                                                                                                                                                                                                                                                                                                                                                                                                    | see above                             | PASIG CITY CHILDREN'S HOSPITAL                             | Alethea R. de Guzman; Anna Ong-Lim; Arianne A. Zamora; Asia Louisa U. Chong; Benedict A. Maralit; Candice Francheska B. Tambaoan; Carlo M. Lapid; Celia Carlos; Devon Ray Pacial; Edsel Maurice Salvaña; El King D. Morado; Elcid Aaron R. Panglinan; Eva Maria Cutiongco-de la Paz; Francis A. Tablizo; Irish Coleen A. Asin; Jaime C. Montoya; Jan Michael C. Yap; Jo-Hannah S. Llamas; John Q. Wong; Joshua Gregor A. Dizon; Juan Antonio R. Magalang; Karol Sophia Agape R. Padilla; Kenneth M. Kim; Kris P. Punayan; Marc Edsel C. Ayes; Marc Jerrone R. Castro; Maria Rosario Singh-Vergeire and Cynthia P. Saloma; Maria Sofia L. Yangzon; Marissa Alejandria; Razel Nikka M. Hao; Renato Jacinto Q. Mantaring; Rianna Patricia S. Cruz; Sheila Mae M. Araiza |
| EPI_ISL_2171124                                                                                                                                                                                                                                                                                                                                                                                                                                                                                                                                                                                                                                                                                                                                                                                                                                                                                                                                                                                                                                                                                                                                                                                                                                                                                                                                                                                                                                                                                                                                                                                                                                                                                                                                                                                                                                                                                                                                                                                                                                                                                                                                                                                                                                                                                                                                                                                                                                                                                                                                                                                                                                                                                                                                                                                                                                                                                                                                                                                                                                                                                                                                                                                                                                                                                                                                                                                                                                                                                                                                                                                            | PCR MED Molecular Laboratory          | Philippine Genome Center                                   | Alethea R. de Guzman; Anna Ong-Lim; Arianne A. Zamora; Asia Louisa U. Chong; Benedict A. Maralit; Candice Francheska B. Tambaoan; Carlo M. Lapid; Celia Carlos; Devon Ray Pacial; Edsel Maurice Salvaña; El King D. Morado; Elcid Aaron R. Panglinan; Eva Maria Cutiongco-de la Paz; Francis A. Tablizo; Irish Coleen A. Asin; Jaime C. Montoya; Jan Michael C. Yap; Jo-Hannah S. Llamas; John Q. Wong; Joshua Gregor A. Dizon; Juan Antonio R. Magalang; Karol Sophia Agape R. Padilla; Kenneth M. Kim; Kris P. Punayan; Marc Edsel C. Ayes; Marc Jerrone R. Castro; Maria Rosario Singh-Vergeire and Cynthia P. Saloma; Maria Sofia L. Yangzon; Marissa Alejandria; Razel Nikka M. Hao; Rianna Patricia S. Cruz; Sheila Mae M. Araiza                              |
| EPI_ISL_1213574, EPI_ISL_1213576, EPI_ISL_1213577, EPI_ISL_1213578, EPI_ISL_1213579, EPI_ISL_1213580, EPI_ISL_1213581, EPI_ISL_1213582, EPI_ISL_1213583, EPI_ISL_1213584, EPI_ISL_1213585, EPI_ISL_1213586, EPI_ISL_1213587, EPI_ISL_1213588, EPI_ISL_1213589, EPI_ISL_1213590, EPI_ISL_1213591, EPI_ISL_1213592, EPI_ISL_1213593, EPI_ISL_1213594, EPI_ISL_1213595, EPI_ISL_1213596, EPI_ISL_1213597, EPI_ISL_1213598, EPI_ISL_1213599, EPI_ISL_1213600, EPI_ISL_1213601, EPI_ISL_1213602, EPI_ISL_1213603, EPI_ISL_1213604, EPI_ISL_1213605, EPI_ISL_1213606, EPI_ISL_1213607, EPI_ISL_1213608, EPI_ISL_1213609, EPI_ISL_1213610, EPI_ISL_1213611, EPI_ISL_1213612, EPI_ISL_1213613, EPI_ISL_1213614, EPI_ISL_1213615, EPI_ISL_1213616, EPI_ISL_1213617, EPI_ISL_1213618, EPI_ISL_1213619, EPI_ISL_1213620, EPI_ISL_1213621, EPI_ISL_1213622, EPI_ISL_1213623, EPI_ISL_1213624, EPI_ISL_1213625, EPI_ISL_1213626, EPI_ISL_1213627, EPI_ISL_1213628, EPI_ISL_1213629, EPI_ISL_1213630, EPI_ISL_1213631, EPI_ISL_1213632, EPI_ISL_1213633, EPI_ISL_1213634, EPI_ISL_1213635, EPI_ISL_1213636, EPI_ISL_1213637, EPI_ISL_1213638, EPI_ISL_1213639, EPI_ISL_1213640, EPI_ISL_1213641, EPI_ISL_1213642, EPI_ISL_1213643, EPI_ISL_1213644, EPI_ISL_1213645, EPI_ISL_1213646, EPI_ISL_1213647, EPI_ISL_1213648, EPI_ISL_1213649, EPI_ISL_1213650, EPI_ISL_1213651, EPI_ISL_1213652, EPI_ISL_1213653, EPI_ISL_1213654, EPI_ISL_1213655, EPI_ISL_1213656, EPI_ISL_1213657, EPI_ISL_1213658, EPI_ISL_1213659, EPI_ISL_1213660, EPI_ISL_1213661, EPI_ISL_1213662, EPI_ISL_1213663, EPI_ISL_1213664, EPI_ISL_1213665, EPI_ISL_1213666, EPI_ISL_1213667, EPI_ISL_1213668, EPI_ISL_1213669, EPI_ISL_1213670, EPI_ISL_1213671, EPI_ISL_1213672, EPI_ISL_1213673, EPI_ISL_1213674, EPI_ISL_1213675, EPI_ISL_1213676, EPI_ISL_1213677, EPI_ISL_1213678, EPI_ISL_1213679, EPI_ISL_1213680, EPI_ISL_1213681, EPI_ISL_1213682, EPI_ISL_1213683, EPI_ISL_1213684, EPI_ISL_1213685, EPI_ISL_1213686, EPI_ISL_1213687, EPI_ISL_1213688, EPI_ISL_1213689, EPI_ISL_1213690, EPI_ISL_1213691, EPI_ISL_1213692, EPI_ISL_1213693, EPI_ISL_1213694, EPI_ISL_1213695, EPI_ISL_1213696, EPI_ISL_1213697, EPI_ISL_1213698, EPI_ISL_1213699, EPI_ISL_1213700, EPI_ISL_1213701, EPI_ISL_1213702, EPI_ISL_1213703, EPI_ISL_1213704, EPI_ISL_1213705, EPI_ISL_1213706, EPI_ISL_1213707, EPI_ISL_1213708, EPI_ISL_1213709, EPI_ISL_1213710, EPI_ISL_1213711, EPI_ISL_1213712, EPI_ISL_1213713, EPI_ISL_1213714, EPI_ISL_1213715, EPI_ISL_1213716, EPI_ISL_1213717, EPI_ISL_1213718, EPI_ISL_1213719, EPI_ISL_1213720, EPI_ISL_1213721, EPI_ISL_1213722, EPI_ISL_1213723, EPI_ISL_1213724, EPI_ISL_1213725, EPI_ISL_1213726, EPI_ISL_1213727, EPI_ISL_1213728, EPI_ISL_1213729, EPI_ISL_1213730, EPI_ISL_1213731, EPI_ISL_1213732, EPI_ISL_1213733, EPI_ISL_1213734, EPI_ISL_1213735, EPI_ISL_1213736, EPI_ISL_1213737, EPI_ISL_1213738, EPI_ISL_1213739, EPI_ISL_1213740, EPI_ISL_1213741, EPI_ISL_1213742, EPI_ISL_1213743, EPI_ISL_1213744, EPI_ISL_1213745, EPI_ISL_1213746, EPI_ISL_1213747, EPI_ISL_1213748, EPI_ISL_1213749, EPI_ISL_1213750, EPI_ISL_1213751, EPI_ISL_1213752, EPI_ISL_1213753, EPI_ISL_1213754, EPI_ISL_1213755, EPI_ISL_1213756, EPI_ISL_1213757, EPI_ISL_1213758, EPI_ISL_1213759, EPI_ISL_1213760, EPI_ISL_1213761, EPI_ISL_1213762, EPI_ISL_1213763, EPI_ISL_1213764, EPI_ISL_1213765, EPI_ISL_1213766, EPI_ISL_1213767, EPI_ISL_1213768, EPI_ISL_1213769, EPI_ISL_1213770, EPI_ISL_1213771, EPI_ISL_1213772, EPI_ISL_1213773, EPI_ISL_1213774, EPI_ISL_1213775, EPI_ISL_1213776, EPI_ISL_1213777, EPI_ISL_1213778 |                                       |                                                            |                                                                                                                                                                                                                                                                                                                                                                                                                                                                                                                                                                                                                                                                                                                                                                      |





|                                                                                                                                                                                                                                                                                                                                                                                                                                                                                                             |                                                     |                                                               |                                                                                                                                                                                                                                                                                                                                                                                                                                                                                                                                                                                                                                                                                                                                                                                                                                                                                                                                                                                                                                                                                                                                                                                                                                |
|-------------------------------------------------------------------------------------------------------------------------------------------------------------------------------------------------------------------------------------------------------------------------------------------------------------------------------------------------------------------------------------------------------------------------------------------------------------------------------------------------------------|-----------------------------------------------------|---------------------------------------------------------------|--------------------------------------------------------------------------------------------------------------------------------------------------------------------------------------------------------------------------------------------------------------------------------------------------------------------------------------------------------------------------------------------------------------------------------------------------------------------------------------------------------------------------------------------------------------------------------------------------------------------------------------------------------------------------------------------------------------------------------------------------------------------------------------------------------------------------------------------------------------------------------------------------------------------------------------------------------------------------------------------------------------------------------------------------------------------------------------------------------------------------------------------------------------------------------------------------------------------------------|
| EPI_ISL_3105870                                                                                                                                                                                                                                                                                                                                                                                                                                                                                             | Rizal Provincial Hospital System - Antipolo Annex 1 | Tropical Medicine<br>Research Institute for Tropical Medicine | Clyde Daplat; Deana Mae Ocampo; Emmanuel Kagning Tsinda; Francisco Gerardo Polotan; Hitoshi Oshitani; Inez Andrea Medado; Jefferson Earl Halog; Joana Ina Manalo; Lei Lanna Dancel; Ma Angelica Tujan; Mariko Saito-Obata; Mayuko Saito; Michiko Okamoto; Samantha Louise Bado                                                                                                                                                                                                                                                                                                                                                                                                                                                                                                                                                                                                                                                                                                                                                                                                                                                                                                                                                 |
| EPI_ISL_491298                                                                                                                                                                                                                                                                                                                                                                                                                                                                                              | Rural Health Unit - Calauan, Laguna                 | Research Institute for Tropical Medicine                      | Bautista; Brunker, K.; C.S.; C.T.; D.L.; Demetria; E.S.; F.G.M.; I.A.P.; M.A.A.; Manalo; Medado; Mercado; O.J.T.; Onza; Polotan; Tujan                                                                                                                                                                                                                                                                                                                                                                                                                                                                                                                                                                                                                                                                                                                                                                                                                                                                                                                                                                                                                                                                                         |
| EPI_ISL_4459524                                                                                                                                                                                                                                                                                                                                                                                                                                                                                             | SABLAYAN RURAL HEALTH UNIT                          | Research Institute for Tropical Medicine/Tohoku University    | Allen Anthony Laraño; Ardiane Ysabelle Dolor; Catalino Demetria; Clyde Daplat; Emmanuel Kagning Tsinda; Francisco Gerardo Polotan; Hitoshi Oshitani; Inez Andrea Medado; Jefferson Earl Halog; Lei Lanna Dancel; Leilanie Nacion; Ma. Angelica Tujan; Machiko Okamoto; Maria Carmen Corpuz; Mariko Siato-Obata; Mayuko Saito                                                                                                                                                                                                                                                                                                                                                                                                                                                                                                                                                                                                                                                                                                                                                                                                                                                                                                   |
| EPI_ISL_2188060, EPI_ISL_2188108, EPI_ISL_2188126, see above                                                                                                                                                                                                                                                                                                                                                                                                                                                | SAN ANTONIO CITY OF ILAGAN HOSPITAL                 | Philippine Genome Center                                      | EPI_ISL_2188276, EPI_ISL_4712444, EPI_ISL_4712556<br>Alethea R. de Guzman; Anna Ong-Lim; Arianne A. Zamora; Asia Louisa U. Chong; Benedict A. Maralit; Candice Francheska B. Tambaoan; Carlo M. Lapid; Celia Carlos; Cynthia P. Saloma; Devon Ray Pacial; Diomedes A. Cariño; Edsel Maurice Salvaña; Edsel Maurice Salvaña; El King D. Morado; Elcid Aaron R. Pangilinan; Eva Maria Cutiongco-de la Paz; Francis A. Tablizo; Henrietta Marie Rodriguez; Irish Coleen A. Asin; Jaime C. Montoya; Jan Michael C. Yap; Jarvin E. Nipales; Jo-Hannah S. Llames; John Q. Wong; Joshua Gregor A. Dizon; Juan Antonio R. Magalang; Karol Sophia Agape R. Padilla; Kenneth M. Kim; Kris P. Punayan; Marc Edsel C. Ayes; Marc Jerrone R. Castro; Maria Rosario Singh-Vergeire and Cynthia P. Saloma; Maria Sofia L. Yangzon; Mariella M. Gamboa; Marissa Alejandria; Niña Francesca Bustamante; Razel Nikka M. Hao; Renato Jacinto Q. Mantaring; Rianna Patricia S. Cruz; Sheila Mae M. Araiza; Shiela Mae M. Araiza; Yvonne Valerie Austria; Zipporah Mariebelle R. Enriquez; Zyrrel V. Mollejon                                                                                                                                       |
| EPI_ISL_4459414                                                                                                                                                                                                                                                                                                                                                                                                                                                                                             | SAN JOSE MUNICIPAL HEALTH OFFICE                    | Research Institute for Tropical Medicine/Tohoku University    | Allen Anthony Laraño; Ardiane Ysabelle Dolor; Catalino Demetria; Clyde Daplat; Emmanuel Kagning Tsinda; Francisco Gerardo Polotan; Hitoshi Oshitani; Inez Andrea Medado; Jefferson Earl Halog; Lei Lanna Dancel; Leilanie Nacion; Ma. Angelica Tujan; Machiko Okamoto; Maria Carmen Corpuz; Mariko Siato-Obata; Mayuko Saito                                                                                                                                                                                                                                                                                                                                                                                                                                                                                                                                                                                                                                                                                                                                                                                                                                                                                                   |
| EPI_ISL_4459505                                                                                                                                                                                                                                                                                                                                                                                                                                                                                             | SAN JUAN DE DIOS EDUCATIONAL FOUNDATION INC.        | Research Institute for Tropical Medicine/Tohoku University    | Allen Anthony Laraño; Ardiane Ysabelle Dolor; Catalino Demetria; Clyde Daplat; Emmanuel Kagning Tsinda; Francisco Gerardo Polotan; Hitoshi Oshitani; Inez Andrea Medado; Jefferson Earl Halog; Lei Lanna Dancel; Leilanie Nacion; Ma. Angelica Tujan; Machiko Okamoto; Maria Carmen Corpuz; Mariko Siato-Obata; Mayuko Saito                                                                                                                                                                                                                                                                                                                                                                                                                                                                                                                                                                                                                                                                                                                                                                                                                                                                                                   |
| EPI_ISL_4459333                                                                                                                                                                                                                                                                                                                                                                                                                                                                                             | SAN JUAN RURAL HEALTH UNIT                          | Research Institute for Tropical Medicine/Tohoku University    | Allen Anthony Laraño; Ardiane Ysabelle Dolor; Catalino Demetria; Clyde Daplat; Emmanuel Kagning Tsinda; Francisco Gerardo Polotan; Hitoshi Oshitani; Inez Andrea Medado; Jefferson Earl Halog; Lei Lanna Dancel; Leilanie Nacion; Ma. Angelica Tujan; Machiko Okamoto; Maria Carmen Corpuz; Mariko Siato-Obata; Mayuko Saito                                                                                                                                                                                                                                                                                                                                                                                                                                                                                                                                                                                                                                                                                                                                                                                                                                                                                                   |
| EPI_ISL_2155600                                                                                                                                                                                                                                                                                                                                                                                                                                                                                             | SAN PABLO CITY GENERAL HOSPITAL                     | Philippine Genome Center                                      | Alethea R. de Guzman; Anna Ong-Lim; Arianne A. Zamora; Asia Louisa U. Chong; Benedict A. Maralit; Candice Francheska B. Tambaoan; Carlo M. Lapid; Celia Carlos; Devon Ray Pacial; Edsel Maurice Salvaña; El King D. Morado; Eva Maria Cutiongco-de la Paz; Francis A. Tablizo; Irish Coleen A. Asin; Jaime C. Montoya; Jan Michael C. Yap; Jo-Hannah S. Llames; John Q. Wong; Joshua Gregor A. Dizon; Juan Antonio R. Magalang; Karol Sophia Agape R. Padilla; Kenneth M. Kim; Kris P. Punayan; Marc Edsel C. Ayes; Marc Jerrone R. Castro; Maria Rosario Singh-Vergeire and Cynthia P. Saloma; Maria Sofia L. Yangzon; Mariella M. Gamboa; Marissa Alejandria; Razel Nikka M. Hao; Rianna Patricia S. Cruz; Sheila Mae M. Araiza                                                                                                                                                                                                                                                                                                                                                                                                                                                                                              |
| EPI_ISL_2155068, EPI_ISL_2155140, EPI_ISL_2155141                                                                                                                                                                                                                                                                                                                                                                                                                                                           | SAN PABLO CITY HEALTH OFFICE                        | Philippine Genome Center                                      | Alethea R. de Guzman; Anna Ong-Lim; Arianne A. Zamora; Asia Louisa U. Chong; Benedict A. Maralit; Candice Francheska B. Tambaoan; Carlo M. Lapid; Celia Carlos; Devon Ray Pacial; Edsel Maurice Salvaña; El King D. Morado; Eva Maria Cutiongco-de la Paz; Francis A. Tablizo; Irish Coleen A. Asin; Jaime C. Montoya; Jan Michael C. Yap; Jo-Hannah S. Llames; John Q. Wong; Joshua Gregor A. Dizon; Juan Antonio R. Magalang; Karol Sophia Agape R. Padilla; Kenneth M. Kim; Kris P. Punayan; Marc Edsel C. Ayes; Marc Jerrone R. Castro; Maria Rosario Singh-Vergeire and Cynthia P. Saloma; Maria Sofia L. Yangzon; Mariella M. Gamboa; Marissa Alejandria; Razel Nikka M. Hao; Rianna Patricia S. Cruz; Sheila Mae M. Araiza                                                                                                                                                                                                                                                                                                                                                                                                                                                                                              |
| EPI_ISL_4459529                                                                                                                                                                                                                                                                                                                                                                                                                                                                                             | SAN PEDRO DOCTORS HOSPITAL, INC.                    | Research Institute for Tropical Medicine/Tohoku University    | Allen Anthony Laraño; Ardiane Ysabelle Dolor; Catalino Demetria; Clyde Daplat; Emmanuel Kagning Tsinda; Francisco Gerardo Polotan; Hitoshi Oshitani; Inez Andrea Medado; Jefferson Earl Halog; Lei Lanna Dancel; Leilanie Nacion; Ma. Angelica Tujan; Machiko Okamoto; Maria Carmen Corpuz; Mariko Siato-Obata; Mayuko Saito                                                                                                                                                                                                                                                                                                                                                                                                                                                                                                                                                                                                                                                                                                                                                                                                                                                                                                   |
| EPI_ISL_4459518                                                                                                                                                                                                                                                                                                                                                                                                                                                                                             | SAN PEDRO RURAL HEALTH UNIT I                       | Research Institute for Tropical Medicine/Tohoku University    | Allen Anthony Laraño; Ardiane Ysabelle Dolor; Catalino Demetria; Clyde Daplat; Emmanuel Kagning Tsinda; Francisco Gerardo Polotan; Hitoshi Oshitani; Inez Andrea Medado; Jefferson Earl Halog; Lei Lanna Dancel; Leilanie Nacion; Ma. Angelica Tujan; Machiko Okamoto; Maria Carmen Corpuz; Mariko Siato-Obata; Mayuko Saito                                                                                                                                                                                                                                                                                                                                                                                                                                                                                                                                                                                                                                                                                                                                                                                                                                                                                                   |
| EPI_ISL_4459310                                                                                                                                                                                                                                                                                                                                                                                                                                                                                             | SAN ROQUE HEALTH CENTER                             | Research Institute for Tropical Medicine/Tohoku University    | Allen Anthony Laraño; Ardiane Ysabelle Dolor; Catalino Demetria; Clyde Daplat; Emmanuel Kagning Tsinda; Francisco Gerardo Polotan; Hitoshi Oshitani; Inez Andrea Medado; Jefferson Earl Halog; Lei Lanna Dancel; Leilanie Nacion; Ma. Angelica Tujan; Machiko Okamoto; Maria Carmen Corpuz; Mariko Siato-Obata; Mayuko Saito                                                                                                                                                                                                                                                                                                                                                                                                                                                                                                                                                                                                                                                                                                                                                                                                                                                                                                   |
| EPI_ISL_4459342, EPI_ISL_4459446                                                                                                                                                                                                                                                                                                                                                                                                                                                                            | SANTA CRUZ DISTRICT HOSPITAL                        | Research Institute for Tropical Medicine/Tohoku University    | Allen Anthony Laraño; Ardiane Ysabelle Dolor; Catalino Demetria; Clyde Daplat; Emmanuel Kagning Tsinda; Francisco Gerardo Polotan; Hitoshi Oshitani; Inez Andrea Medado; Jefferson Earl Halog; Lei Lanna Dancel; Leilanie Nacion; Ma. Angelica Tujan; Machiko Okamoto; Maria Carmen Corpuz; Mariko Siato-Obata; Mayuko Saito                                                                                                                                                                                                                                                                                                                                                                                                                                                                                                                                                                                                                                                                                                                                                                                                                                                                                                   |
| EPI_ISL_4459490                                                                                                                                                                                                                                                                                                                                                                                                                                                                                             | SANTA CRUZ RURAL HEALTH UNIT I                      | Research Institute for Tropical Medicine/Tohoku University    | Allen Anthony Laraño; Ardiane Ysabelle Dolor; Catalino Demetria; Clyde Daplat; Emmanuel Kagning Tsinda; Francisco Gerardo Polotan; Hitoshi Oshitani; Inez Andrea Medado; Jefferson Earl Halog; Lei Lanna Dancel; Leilanie Nacion; Ma. Angelica Tujan; Machiko Okamoto; Maria Carmen Corpuz; Mariko Siato-Obata; Mayuko Saito                                                                                                                                                                                                                                                                                                                                                                                                                                                                                                                                                                                                                                                                                                                                                                                                                                                                                                   |
| EPI_ISL_4459443                                                                                                                                                                                                                                                                                                                                                                                                                                                                                             | SANTA CRUZ RURAL HEALTH UNIT II                     | Research Institute for Tropical Medicine/Tohoku University    | Allen Anthony Laraño; Ardiane Ysabelle Dolor; Catalino Demetria; Clyde Daplat; Emmanuel Kagning Tsinda; Francisco Gerardo Polotan; Hitoshi Oshitani; Inez Andrea Medado; Jefferson Earl Halog; Lei Lanna Dancel; Leilanie Nacion; Ma. Angelica Tujan; Machiko Okamoto; Maria Carmen Corpuz; Mariko Siato-Obata; Mayuko Saito                                                                                                                                                                                                                                                                                                                                                                                                                                                                                                                                                                                                                                                                                                                                                                                                                                                                                                   |
| EPI_ISL_4459346                                                                                                                                                                                                                                                                                                                                                                                                                                                                                             | SANTA TERESITA RURAL HEALTH UNIT                    | Research Institute for Tropical Medicine/Tohoku University    | Allen Anthony Laraño; Ardiane Ysabelle Dolor; Catalino Demetria; Clyde Daplat; Emmanuel Kagning Tsinda; Francisco Gerardo Polotan; Hitoshi Oshitani; Inez Andrea Medado; Jefferson Earl Halog; Lei Lanna Dancel; Leilanie Nacion; Ma. Angelica Tujan; Machiko Okamoto; Maria Carmen Corpuz; Mariko Siato-Obata; Mayuko Saito                                                                                                                                                                                                                                                                                                                                                                                                                                                                                                                                                                                                                                                                                                                                                                                                                                                                                                   |
| EPI_ISL_2156586                                                                                                                                                                                                                                                                                                                                                                                                                                                                                             | SOLANA RURAL HEALTH UNIT                            | Philippine Genome Center                                      | Alethea R. de Guzman; Anna Ong-Lim; Arianne A. Zamora; Asia Louisa U. Chong; Benedict A. Maralit; Candice Francheska B. Tambaoan; Carlo M. Lapid; Celia Carlos; Devon Ray Pacial; Edsel Maurice Salvaña; El King D. Morado; Elcid Aaron R. Pangilinan; Eva Maria Cutiongco-de la Paz; Francis A. Tablizo; Irish Coleen A. Asin; Jaime C. Montoya; Jan Michael C. Yap; Jo-Hannah S. Llames; John Q. Wong; Joshua Gregor A. Dizon; Juan Antonio R. Magalang; Karol Sophia Agape R. Padilla; Kenneth M. Kim; Kris P. Punayan; Marc Edsel C. Ayes; Marc Jerrone R. Castro; Maria Rosario Singh-Vergeire and Cynthia P. Saloma; Maria Sofia L. Yangzon; Mariella M. Gamboa; Marissa Alejandria; Razel Nikka M. Hao; Rianna Patricia S. Cruz; Sheila Mae M. Araiza                                                                                                                                                                                                                                                                                                                                                                                                                                                                   |
| EPI_ISL_1081795                                                                                                                                                                                                                                                                                                                                                                                                                                                                                             | SOUTH SUPER HI-WAY                                  | Philippine Genome Center                                      | Alethea R. de Guzman; Anna Ong-Lim; Arianne A. Zamora; Asia Louisa U. Chong; Benedict A. Maralit; Candice Francheska B. Tambaoan; Carlo M. Lapid; Celia Carlos; Cynthia P. Saloma; Devon Ray Pacial; Edsel Maurice Salvaña; El King D. Morado; Eva Maria Cutiongco-de la Paz; Francis A. Tablizo; Irish Coleen A. Asin; Jaime C. Montoya; Jan Michael C. Yap; Jo-Hannah S. Llames; John Q. Wong; Joshua Gregor A. Dizon; Juan Antonio R. Magalang; Karol Sophia Agape R. Padilla; Kenneth M. Kim; Kris P. Punayan; Marc Edsel C. Ayes; Marc Jerrone R. Castro; Maria Sofia L. Yangzon; Mariella M. Gamboa; Marissa Alejandria; Razel Nikka M. Hao; Rianna Patricia S. Cruz; Sheila Mae M. Araiza; and Maria Rosario Singh-Vergeire                                                                                                                                                                                                                                                                                                                                                                                                                                                                                             |
| EPI_ISL_4459287                                                                                                                                                                                                                                                                                                                                                                                                                                                                                             | ST. CLARE'S MEDICAL CENTER, INC.                    | Research Institute for Tropical Medicine/Tohoku University    | Allen Anthony Laraño; Ardiane Ysabelle Dolor; Catalino Demetria; Clyde Daplat; Emmanuel Kagning Tsinda; Francisco Gerardo Polotan; Hitoshi Oshitani; Inez Andrea Medado; Jefferson Earl Halog; Lei Lanna Dancel; Leilanie Nacion; Ma. Angelica Tujan; Machiko Okamoto; Maria Carmen Corpuz; Mariko Siato-Obata; Mayuko Saito                                                                                                                                                                                                                                                                                                                                                                                                                                                                                                                                                                                                                                                                                                                                                                                                                                                                                                   |
| EPI_ISL_2171104                                                                                                                                                                                                                                                                                                                                                                                                                                                                                             | STA. ROSA CHO - GENEXPERT LABORATORY                | Philippine Genome Center                                      | Alethea R. de Guzman; Anna Ong-Lim; Arianne A. Zamora; Asia Louisa U. Chong; Benedict A. Maralit; Candice Francheska B. Tambaoan; Carlo M. Lapid; Celia Carlos; Devon Ray Pacial; Edsel Maurice Salvaña; El King D. Morado; Elcid Aaron R. Pangilinan; Eva Maria Cutiongco-de la Paz; Francis A. Tablizo; Irish Coleen A. Asin; Jaime C. Montoya; Jan Michael C. Yap; Jo-Hannah S. Llames; John Q. Wong; Joshua Gregor A. Dizon; Juan Antonio R. Magalang; Karol Sophia Agape R. Padilla; Kenneth M. Kim; Kris P. Punayan; Marc Edsel C. Ayes; Marc Jerrone R. Castro; Maria Rosario Singh-Vergeire and Cynthia P. Saloma; Maria Sofia L. Yangzon; Mariella M. Gamboa; Marissa Alejandria; Razel Nikka M. Hao; Rianna Patricia S. Cruz; Sheila Mae M. Araiza                                                                                                                                                                                                                                                                                                                                                                                                                                                                   |
| EPI_ISL_2105340, EPI_ISL_2105377, EPI_ISL_2105394, EPI_ISL_2155797, EPI_ISL_2155798, EPI_ISL_2155799, EPI_ISL_2155800, EPI_ISL_2155801, EPI_ISL_2155802, EPI_ISL_2155803, EPI_ISL_2155804, EPI_ISL_2155805, EPI_ISL_2155806, EPI_ISL_2155807, EPI_ISL_2155808, EPI_ISL_2155809, EPI_ISL_2155810, EPI_ISL_2155811, EPI_ISL_2155812, EPI_ISL_2156250, EPI_ISL_2156251, EPI_ISL_2156390, EPI_ISL_2156413, EPI_ISL_2171139, EPI_ISL_2171190, EPI_ISL_2189088, EPI_ISL_2189147, EPI_ISL_2189397, EPI_ISL_4713592 | Safeguard DNA Diagnostic, Inc.                      | Philippine Genome Center                                      | Alethea R. de Guzman; Anna Ong-Lim; Arianne A. Zamora; Asia Louisa U. Chong; Benedict A. Maralit; Candice Francheska B. Tambaoan; Carlo M. Lapid; Celia Carlos; Cynthia P. Saloma; Devon Ray Pacial; Diomedes A. Cariño; Edsel Maurice Salvaña; Edsel Maurice Salvaña; El King D. Morado; Elcid Aaron R. Pangilinan; Eva Maria Cutiongco-de la Paz; Francis A. Tablizo; Henrietta Marie Rodriguez; Irish Coleen A. Asin; Jaime C. Montoya; Jan Michael C. Yap; Jarvin E. Nipales; Jo-Hannah S. Llames; John Q. Wong; Joshua Gregor A. Dizon; Juan Antonio R. Magalang; Karol Sophia Agape R. Padilla; Kenneth M. Kim; Kris P. Punayan; Marc Edsel C. Ayes; Marc Jerrone R. Castro; Maria Rosario Singh-Vergeire and Cynthia P. Saloma; Maria Sofia L. Yangzon; Mariella M. Gamboa; Marissa Alejandria; Niña Francesca Bustamante; Razel Nikka M. Hao; Renato Jacinto Q. Mantaring; Rianna Patricia S. Cruz; Sheila Mae M. Araiza; Shiela Mae M. Araiza; Yvonne Valerie Austria; Zipporah Mariebelle R. Enriquez; Zyrrel V. Mollejon                                                                                                                                                                                            |
| EPI_ISL_2105287, EPI_ISL_2155664, EPI_ISL_2155665, EPI_ISL_2155666, EPI_ISL_2155667, EPI_ISL_2155668, EPI_ISL_2155669, EPI_ISL_2155670, EPI_ISL_2155671, EPI_ISL_2155672, EPI_ISL_2155673, EPI_ISL_2155674, EPI_ISL_2155675, EPI_ISL_2156497, EPI_ISL_2156583, EPI_ISL_2156590, EPI_ISL_2188960, EPI_ISL_2859702, EPI_ISL_2859714, EPI_ISL_2859921, EPI_ISL_4714022                                                                                                                                         | San Antonio City of Ilagan Hospital                 | Philippine Genome Center                                      | Alethea R. de Guzman; Anna Ong-Lim; Arianne A. Zamora; Asia Louisa U. Chong; Benedict A. Maralit; Candice Francheska B. Tambaoan; Carlo M. Lapid; Celia Carlos; Cynthia P. Saloma; Devon Ray Pacial; Diomedes A. Carino; Diomedes A. Cariño; Edsel Maurice Salvaña; Edsel Maurice Salvaña; El King D. Morado; Elcid Aaron R. Pangilinan; Eva Maria Cutiongco-de la Paz; Francis A. Tablizo; Henrietta Marie Rodriguez; Irish Coleen A. Asin; Jaime C. Montoya; Jan Michael C. Yap; Jarvin E. Nipales; Jo-Hannah S. Llames; John Q. Wong; Joshua Gregor A. Dizon; Juan Antonio R. Magalang; Karol Sophia Agape R. Padilla; Kenneth M. Kim; Kris P. Punayan; Kristina Patriz Dela Cruz; Kristina Patriz Dela Cruz; Lindsay Claire D.L. Carandang; Lindsay Claire D.L. Carandang; Ma. Exanil Planting; Marc Edsel C. Ayes; Marc Jerrone R. Castro; Maria Rosario Singh-Vergeire; Maria Rosario Singh-Vergeire and Cynthia P. Saloma; Maria Sofia L. Yangzon; Marielle M. Gamboa; Marissa Alejandria; Niña Francesca Bustamante; Razel Nikka M. Hao; Renato Jacinto Q. Mantaring; Rianna Patricia S. Cruz; Sheila Mae M. Araiza; Shiela Mae M. Araiza; Yvonne Valerie Austria; Zipporah Mariebelle R. Enriquez; Zyrrel V. Mollejon |
| EPI_ISL_2155842, EPI_ISL_2155843, EPI_ISL_2155844, EPI_ISL_2155847, EPI_ISL_2156314, EPI_ISL_2156389                                                                                                                                                                                                                                                                                                                                                                                                        | San Lazaro Hospital                                 | Philippine Genome Center                                      | Alethea R. de Guzman; Anna Ong-Lim; Arianne A. Zamora; Asia Louisa U. Chong; Benedict A. Maralit; Candice Francheska B. Tambaoan; Carlo M. Lapid; Celia Carlos; Devon Ray Pacial; Edsel Maurice Salvaña; El King D. Morado; Elcid Aaron R. Pangilinan; Eva Maria Cutiongco-de la Paz; Francis A. Tablizo; Irish Coleen A. Asin; Jaime C. Montoya; Jan Michael C. Yap; Jo-Hannah S. Llames; John Q. Wong; Joshua Gregor A. Dizon; Juan Antonio R. Magalang; Karol Sophia Agape R. Padilla; Kenneth M. Kim; Kris P. Punayan; Marc Edsel C. Ayes; Marc Jerrone R. Castro; Maria Rosario Singh-Vergeire and Cynthia P. Saloma; Maria Sofia L. Yangzon; Mariella M. Gamboa; Marissa Alejandria; Razel Nikka M. Hao; Rianna Patricia S. Cruz; Sheila Mae M. Araiza                                                                                                                                                                                                                                                                                                                                                                                                                                                                   |
| EPI_ISL_491465, EPI_ISL_491466, EPI_ISL_491471                                                                                                                                                                                                                                                                                                                                                                                                                                                              | San Lazaro Hospital                                 | Research Institute for Tropical Medicine                      | Catalino Demetria; Criselda Bautista; Daria Manalo; Edelwisa Mercado; Francisco Gerardo Polotan; Inez Andrea Medado; Kirstyn Brunker; Ma. Angelica Tujan; Othoniel Jan Onza                                                                                                                                                                                                                                                                                                                                                                                                                                                                                                                                                                                                                                                                                                                                                                                                                                                                                                                                                                                                                                                    |
| EPI_ISL_2155098, EPI_ISL_2156226, EPI_ISL_2156227,                                                                                                                                                                                                                                                                                                                                                                                                                                                          | San Lazaro Hospital (SLH)                           | Philippine Genome Center                                      | Alethea R. de Guzman; Anna Ong-Lim; Arianne A. Zamora; Asia Louisa U. Chong; Benedict A. Maralit; Candice Francheska B. Tambaoan; Carlo M. Lapid; Celia Carlos; Devon Ray Pacial; Edsel Maurice Salvaña; El King D. Morado; Elcid Aaron R. Pangilinan; Eva Maria Cutiongco-de la Paz; Francis A. Tablizo; Irish Coleen A. Asin; Jaime C. Montoya; Jan Michael C. Yap; Jo-Hannah S. Llames; John Q. Wong; Joshua Gregor A. Dizon; Juan Antonio R. Magalang; Karol Sophia Agape R. Padilla; Kenneth M. Kim; Kris P. Punayan; Marc Edsel C. Ayes; Marc Jerrone R. Castro; Maria Rosario Singh-Vergeire and Cynthia P. Saloma; Maria Sofia L. Yangzon; Mariella M. Gamboa; Marissa Alejandria; Razel Nikka M. Hao; Rianna Patricia S. Cruz; Sheila Mae M. Araiza                                                                                                                                                                                                                                                                                                                                                                                                                                                                   |





|                                                                                                                                                                                                                                                                                                                                                                                                                                                                                                                                                                                                                                                                                                                                                                                                                                                                                                                                                                                                                                                                                                                                                                                                                                                                                                                                                             |                                                                    |                                                                                                   |                                                                                                                                                                                                                                                                                                                                                                                                                                                                                                                                                                                                                                                                                                                                                                                                                                                                                                                                                                                                                                                                                                                            |  |  |  |
|-------------------------------------------------------------------------------------------------------------------------------------------------------------------------------------------------------------------------------------------------------------------------------------------------------------------------------------------------------------------------------------------------------------------------------------------------------------------------------------------------------------------------------------------------------------------------------------------------------------------------------------------------------------------------------------------------------------------------------------------------------------------------------------------------------------------------------------------------------------------------------------------------------------------------------------------------------------------------------------------------------------------------------------------------------------------------------------------------------------------------------------------------------------------------------------------------------------------------------------------------------------------------------------------------------------------------------------------------------------|--------------------------------------------------------------------|---------------------------------------------------------------------------------------------------|----------------------------------------------------------------------------------------------------------------------------------------------------------------------------------------------------------------------------------------------------------------------------------------------------------------------------------------------------------------------------------------------------------------------------------------------------------------------------------------------------------------------------------------------------------------------------------------------------------------------------------------------------------------------------------------------------------------------------------------------------------------------------------------------------------------------------------------------------------------------------------------------------------------------------------------------------------------------------------------------------------------------------------------------------------------------------------------------------------------------------|--|--|--|
|                                                                                                                                                                                                                                                                                                                                                                                                                                                                                                                                                                                                                                                                                                                                                                                                                                                                                                                                                                                                                                                                                                                                                                                                                                                                                                                                                             | Philippines National Institutes of Health (UP NIH)                 | Center                                                                                            | Henrietta Marie Rodriguez; Irish Coleen A. Asin; Jaime C. Montoya; Jan Michael C. Yap; Jarvin E. Nipales; Jo-Hannah S. Llamas; John Q. Wong; Joshua Gregor A. Dizon; Juan Antonio R. Magalang; Karol Sophia Agape R. Padilla; Kenneth M. Kim; Kris P. Punayan; Kristina Patriz Dela Cruz; Lindsay Claire D.L. Carandang; Ma. Exanil Plantig; Marc Edsel C. Ayes; Marc Jerrone R. Castro; Maria Rosario Singh-Vergeire and Cynthia P. Saloma; Maria Sofia L. Yangzon; Marielle M Gamboa; Marissa Alejandria; Razel Nikka M. Hao; Renato Jacinto Q. Mantaring; Rianna Patricia S. Cruz; Sheila Mae M. Araiza; Yvonne Valerie Austria; Zipporah Mariebelle R. Enriquez; Zyrel V. Mollejon                                                                                                                                                                                                                                                                                                                                                                                                                                     |  |  |  |
| EPI_ISL_4459313, EPI_ISL_4459316                                                                                                                                                                                                                                                                                                                                                                                                                                                                                                                                                                                                                                                                                                                                                                                                                                                                                                                                                                                                                                                                                                                                                                                                                                                                                                                            | VILLAMOR HEALTH CENTER                                             | Research Institute for Tropical Medicine/Tohoku University                                        | Allen Anthony Laraño; Ardiane Ysabelle Dolor; Catalino Demetria; Clyde Dapát; Emmanuel Kagning Tsinda; Francisco Gerardo Polotan; Hitoshi Oshitani; Inez Andrea Medado; Jefferson Earl Halog; Lei Lanna Dancel; Leilanie Nacion; Ma. Angelica Tujan; Machiko Okamoto; Maria Carmen Corpuz; Mariko Siato-Obata; Mayuko Saito                                                                                                                                                                                                                                                                                                                                                                                                                                                                                                                                                                                                                                                                                                                                                                                                |  |  |  |
| EPI_ISL_2090606, EPI_ISL_2090607, EPI_ISL_2090608, EPI_ISL_2090609, EPI_ISL_2090610, EPI_ISL_2090611, EPI_ISL_2090612, EPI_ISL_2090613, EPI_ISL_2090614, EPI_ISL_2090615, EPI_ISL_2090616                                                                                                                                                                                                                                                                                                                                                                                                                                                                                                                                                                                                                                                                                                                                                                                                                                                                                                                                                                                                                                                                                                                                                                   | see above                                                          | VIROLOGY, AFRIMS                                                                                  | A.T.; Chinnawitrotipisan, P.; Chua; Claire Navarro, F.; Corazon Diones, P.; D. Jr.; Fernandez, S.; H. Jr.; Huang, J.M.; Jones, A.; Joonlasak, K.; Klungthong, C.; M.T.; Manasatienkij, W.; Tabinas, V. II; Valderama; Velasco; Villa                                                                                                                                                                                                                                                                                                                                                                                                                                                                                                                                                                                                                                                                                                                                                                                                                                                                                       |  |  |  |
| EPI_ISL_4714163, EPI_ISL_4714392, EPI_ISL_4714465, EPI_ISL_4714647, EPI_ISL_4714800, EPI_ISL_4715028, EPI_ISL_4715222, EPI_ISL_4715247                                                                                                                                                                                                                                                                                                                                                                                                                                                                                                                                                                                                                                                                                                                                                                                                                                                                                                                                                                                                                                                                                                                                                                                                                      | see above                                                          | VITALAB Molecular Laboratory                                                                      | Alethea R. de Guzman; Anna Ong-Lim; Arianne A. Zamora; Benedict A. Maralit; Carlo M. Lapid; Celia Carlos; Cynthia P. Saloma; Devon Ray Pacial; Diomedes A. Cariño; Edsel Maurice Salvana; El King D. Morado; Elcid Aaron R. Panglinan; Eva Maria Cutiongco-de la Paz; Francis A. Tablizo; Henrietta Marie Rodriguez; Jaime C. Montoya; Jan Michael C. Yap; Jarvin E. Nipales; Jo-Hannah S. Llamas; John Q. Wong; Joshua Gregor A. Dizon; Juan Antonio R. Magalang; Karol Sophia Agape R. Padilla; Kenneth M. Kim; Kris P. Punayan; Kristina Patriz Dela Cruz; Lindsay Claire D.L. Carandang; Ma. Exanil Plantig; Marc Edsel C. Ayes; Maria Rosario Singh-Vergeire; Maria Sofia L. Yangzon; Marielle M. Gamboa; Marissa Alejandria; Niña Francesca Bustamante; Razel Nikka M. Hao; Renato Jacinto Q. Mantaring; Rianna Patricia S. Cruz; Shiela Mae M. Araiza; Yvonne Valerie Austria; Zipporah Mariebelle R. Enriquez; Zyrel V. Mollejon                                                                                                                                                                                   |  |  |  |
| EPI_ISL_2105341, EPI_ISL_2155424, EPI_ISL_2155425, EPI_ISL_2155426, EPI_ISL_2155427, EPI_ISL_2155428, EPI_ISL_2155429, EPI_ISL_2155430, EPI_ISL_2155431, EPI_ISL_2155432, EPI_ISL_2155433, EPI_ISL_2155434, EPI_ISL_2156501, EPI_ISL_2156509, EPI_ISL_2156510, EPI_ISL_2156530, EPI_ISL_2156538, EPI_ISL_2156549, EPI_ISL_2156767                                                                                                                                                                                                                                                                                                                                                                                                                                                                                                                                                                                                                                                                                                                                                                                                                                                                                                                                                                                                                           | see above                                                          | Valenzuela Hope Molecular Laboratory                                                              | Alethea R. de Guzman; Anna Ong-Lim; Arianne A. Zamora; Asia Louisa U. Chong; Benedict A. Maralit; Candice Francheska B. Tambaan; Carlo M. Lapid; Celia Carlos; Devon Ray Pacial; Edsel Maurice Salvaña; El King D. Morado; Elcid Aaron R. Panglinan; Eva Maria Cutiongco-de la Paz; Francis A. Tablizo; Irish Coleen A. Asin; Jaime C. Montoya; Jan Michael C. Yap; Jo-Hannah S. Llamas; John Q. Wong; Joshua Gregor A. Dizon; Juan Antonio R. Magalang; Karol Sophia Agape R. Padilla; Kenneth M. Kim; Kris P. Punayan; Marc Edsel C. Ayes; Marc Jerrone R. Castro; Maria Rosario Singh-Vergeire and Cynthia P. Saloma; Maria Sofia L. Yangzon; Marissa Alejandria; Razel Nikka M. Hao; Rianna Patricia S. Cruz; Sheila Mae M. Araiza                                                                                                                                                                                                                                                                                                                                                                                     |  |  |  |
| EPI_ISL_430840                                                                                                                                                                                                                                                                                                                                                                                                                                                                                                                                                                                                                                                                                                                                                                                                                                                                                                                                                                                                                                                                                                                                                                                                                                                                                                                                              | Veterans Memorial Medical Center                                   | Research Institute for Tropical Medicine                                                          | Bautista; Brunker, K.; C.S.; C.T.; D.L.; Demetria; E.S.; F.G.M.; I.A.P.; Manalo; Medado; Mercado; O.J.T.; Onza; Polotan                                                                                                                                                                                                                                                                                                                                                                                                                                                                                                                                                                                                                                                                                                                                                                                                                                                                                                                                                                                                    |  |  |  |
| EPI_ISL_2859769, EPI_ISL_4713699, EPI_ISL_4713715                                                                                                                                                                                                                                                                                                                                                                                                                                                                                                                                                                                                                                                                                                                                                                                                                                                                                                                                                                                                                                                                                                                                                                                                                                                                                                           | Vicente Sotto Memorial Medical Center (VSMCM)                      | Philippine Genome Center                                                                          | Alethea R. de Guzman; Anna Ong-Lim; Arianne A. Zamora; Benedict A. Maralit; Carlo M. Lapid; Celia Carlos; Cynthia P. Saloma; Devon Ray Pacial; Diomedes A. Carino; Diomedes A. Cariño; Edsel Maurice Salvaña; Edsel Maurice Salvaña; El King D. Morado; Elcid Aaron R. Panglinan; Eva Maria Cutiongco-de la Paz; Francis A. Tablizo; Henrietta Marie Rodriguez; Jaime C. Montoya; Jan Michael C. Yap; Jarvin E. Nipales; Jo-Hannah S. Llamas; John Q. Wong; Joshua Gregor A. Dizon; Juan Antonio R. Magalang; Karol Sophia Agape R. Padilla; Kenneth M. Kim; Kris P. Punayan; Kristina Patriz Dela Cruz; Lindsay Claire D.L. Carandang; Ma. Exanil Plantig; Marc Edsel C. Ayes; Maria Rosario Singh-Vergeire; Maria Sofia L. Yangzon; Marielle M Gamboa; Marissa Alejandria; Nina Francesca Bustamante; Niña Francesca Bustamante; Razel Nikka M. Hao; Renato Jacinto Q. Mantaring; Rianna Patricia S. Cruz; Sheila Mae M. Araiza; Shiela Mae M. Araiza; Yvonne Valerie Austria; Zipporah Mariebelle R. Enriquez; Zyrel V. Mollejon                                                                                        |  |  |  |
| EPI_ISL_2859143, EPI_ISL_2859153, EPI_ISL_2859157, EPI_ISL_2859283, EPI_ISL_2859286, EPI_ISL_2859292, EPI_ISL_2859296                                                                                                                                                                                                                                                                                                                                                                                                                                                                                                                                                                                                                                                                                                                                                                                                                                                                                                                                                                                                                                                                                                                                                                                                                                       | see above                                                          | West Metro Medical Center GeneXpert Laboratory                                                    | Alethea R. de Guzman; Anna Ong-Lim; Arianne A. Zamora; Benedict A. Maralit; Carlo M. Lapid; Celia Carlos; Devon Ray Pacial; Diomedes A. Carino; Edsel Maurice Salvaña; El King D. Morado; Elcid Aaron R. Panglinan; Eva Maria Cutiongco-de la Paz; Francis A. Tablizo; Henrietta Marie Rodriguez; Jaime C. Montoya; Jan Michael C. Yap; Jarvin E. Nipales; Jo-Hannah S. Llamas; John Q. Wong; Joshua Gregor A. Dizon; Juan Antonio R. Magalang; Karol Sophia Agape R. Padilla; Kenneth M. Kim; Kris P. Punayan; Kristina Patriz Dela Cruz; Lindsay Claire D.L. Carandang; Ma. Exanil Plantig; Marc Edsel C. Ayes; Maria Rosario Singh-Vergeire and Cynthia P. Saloma; Maria Sofia L. Yangzon; Marielle M Gamboa; Marissa Alejandria; Niña Francesca Bustamante; Razel Nikka M. Hao; Renato Jacinto Q. Mantaring; Rianna Patricia S. Cruz; Sheila Mae M. Araiza; Yvonne Valerie Austria; Zipporah Mariebelle R. Enriquez; Zyrel V. Mollejon                                                                                                                                                                                 |  |  |  |
| EPI_ISL_4715895, EPI_ISL_4715939, EPI_ISL_4716030, EPI_ISL_4716051, EPI_ISL_4716056, EPI_ISL_4716065, EPI_ISL_4716065, EPI_ISL_4716101, EPI_ISL_4716104, EPI_ISL_4716111, EPI_ISL_4716117, EPI_ISL_4716130, EPI_ISL_4716164, EPI_ISL_4716174, EPI_ISL_4716215, EPI_ISL_4716288, EPI_ISL_4716326, EPI_ISL_4716342, EPI_ISL_4716354, EPI_ISL_4716361, EPI_ISL_4716368, EPI_ISL_4716396, EPI_ISL_4716408, EPI_ISL_4716479, EPI_ISL_4716539, EPI_ISL_4716578, EPI_ISL_4716584, EPI_ISL_4716712, EPI_ISL_4716755, EPI_ISL_4716759, EPI_ISL_4716788, EPI_ISL_4716830, EPI_ISL_4716910, EPI_ISL_4716976, EPI_ISL_4717068, EPI_ISL_4717080, EPI_ISL_4717116, EPI_ISL_4717125, EPI_ISL_4717172, EPI_ISL_4717251, EPI_ISL_4717271, EPI_ISL_4717347, EPI_ISL_4717397, EPI_ISL_4717398, EPI_ISL_4717407, EPI_ISL_4717444, EPI_ISL_4717452, EPI_ISL_4717467                                                                                                                                                                                                                                                                                                                                                                                                                                                                                                              | see above                                                          | Western Visayas Medical Center (WVMC)                                                             | Alethea R. de Guzman; Anna Ong-Lim; Arianne A. Zamora; Benedict A. Maralit; Carlo M. Lapid; Celia Carlos; Cynthia P. Saloma; Devon Ray Pacial; Diomedes A. Cariño; Edsel Maurice Salvana; El King D. Morado; Elcid Aaron R. Panglinan; Eva Maria Cutiongco-de la Paz; Francis A. Tablizo; Henrietta Marie Rodriguez; Jaime C. Montoya; Jan Michael C. Yap; Jarvin E. Nipales; Jo-Hannah S. Llamas; John Q. Wong; Joshua Gregor A. Dizon; Juan Antonio R. Magalang; Karol Sophia Agape R. Padilla; Kenneth M. Kim; Kris P. Punayan; Kristina Patriz Dela Cruz; Lindsay Claire D.L. Carandang; Ma. Exanil Plantig; Marc Edsel C. Ayes; Maria Rosario Singh-Vergeire; Maria Sofia L. Yangzon; Marielle M. Gamboa; Marissa Alejandria; Niña Francesca Bustamante; Razel Nikka M. Hao; Renato Jacinto Q. Mantaring; Rianna Patricia S. Cruz; Sheila Mae M. Araiza; Yvonne Valerie Austria; Zipporah Mariebelle R. Enriquez; Zyrel V. Mollejon                                                                                                                                                                                   |  |  |  |
| EPI_ISL_4712265                                                                                                                                                                                                                                                                                                                                                                                                                                                                                                                                                                                                                                                                                                                                                                                                                                                                                                                                                                                                                                                                                                                                                                                                                                                                                                                                             | Western Visayas State University - Molecular Diagnostic Laboratory | Philippine Genome Center                                                                          | Alethea R. de Guzman; Anna Ong-Lim; Arianne A. Zamora; Benedict A. Maralit; Carlo M. Lapid; Celia Carlos; Cynthia P. Saloma; Devon Ray Pacial; Diomedes A. Cariño; Edsel Maurice Salvana; El King D. Morado; Elcid Aaron R. Panglinan; Eva Maria Cutiongco-de la Paz; Francis A. Tablizo; Henrietta Marie Rodriguez; Jaime C. Montoya; Jan Michael C. Yap; Jarvin E. Nipales; Jo-Hannah S. Llamas; John Q. Wong; Joshua Gregor A. Dizon; Juan Antonio R. Magalang; Karol Sophia Agape R. Padilla; Kenneth M. Kim; Kris P. Punayan; Kristina Patriz Dela Cruz; Lindsay Claire D.L. Carandang; Ma. Exanil Plantig; Marc Edsel C. Ayes; Maria Rosario Singh-Vergeire; Maria Sofia L. Yangzon; Marielle M. Gamboa; Marissa Alejandria; Niña Francesca Bustamante; Razel Nikka M. Hao; Renato Jacinto Q. Mantaring; Rianna Patricia S. Cruz; Sheila Mae M. Araiza; Yvonne Valerie Austria; Zipporah Mariebelle R. Enriquez; Zyrel V. Mollejon                                                                                                                                                                                   |  |  |  |
| EPI_ISL_2859138, EPI_ISL_2859186, EPI_ISL_2859305, EPI_ISL_2859317, EPI_ISL_2859324, EPI_ISL_2859330, EPI_ISL_2859334, EPI_ISL_2859349, EPI_ISL_2859352, EPI_ISL_2859356, EPI_ISL_2859359, EPI_ISL_2859367                                                                                                                                                                                                                                                                                                                                                                                                                                                                                                                                                                                                                                                                                                                                                                                                                                                                                                                                                                                                                                                                                                                                                  | see above                                                          | Zamboanga City Medical Center                                                                     | Alethea R. de Guzman; Anna Ong-Lim; Arianne A. Zamora; Benedict A. Maralit; Carlo M. Lapid; Celia Carlos; Devon Ray Pacial; Diomedes A. Carino; Edsel Maurice Salvaña; El King D. Morado; Elcid Aaron R. Panglinan; Eva Maria Cutiongco-de la Paz; Francis A. Tablizo; Henrietta Marie Rodriguez; Jaime C. Montoya; Jan Michael C. Yap; Jarvin E. Nipales; Jo-Hannah S. Llamas; John Q. Wong; Joshua Gregor A. Dizon; Juan Antonio R. Magalang; Karol Sophia Agape R. Padilla; Kenneth M. Kim; Kris P. Punayan; Kristina Patriz Dela Cruz; Lindsay Claire D.L. Carandang; Ma. Exanil Plantig; Marc Edsel C. Ayes; Maria Rosario Singh-Vergeire; Maria Sofia L. Yangzon; Marielle M Gamboa; Marissa Alejandria; Nina Francesca Bustamante; Razel Nikka M. Hao; Renato Jacinto Q. Mantaring; Rianna Patricia S. Cruz; Sheila Mae M. Araiza; Yvonne Valerie Austria; Zipporah Mariebelle R. Enriquez; Zyrel V. Mollejon                                                                                                                                                                                                       |  |  |  |
| EPI_ISL_2859145, EPI_ISL_2859272, EPI_ISL_2859274, EPI_ISL_2859279, EPI_ISL_2859294, EPI_ISL_2859301, EPI_ISL_2859306, EPI_ISL_2859327, EPI_ISL_2859341, EPI_ISL_2859348, EPI_ISL_2859358, EPI_ISL_2859366, EPI_ISL_2859368, EPI_ISL_2859371, EPI_ISL_4712024, EPI_ISL_4712104, EPI_ISL_4712141, EPI_ISL_4712146, EPI_ISL_4712178, EPI_ISL_4712199, EPI_ISL_4714068, EPI_ISL_4714737, EPI_ISL_4714787, EPI_ISL_4714846, EPI_ISL_4714932, EPI_ISL_4715033, EPI_ISL_4715228, EPI_ISL_4716376, EPI_ISL_4717145                                                                                                                                                                                                                                                                                                                                                                                                                                                                                                                                                                                                                                                                                                                                                                                                                                                 | see above                                                          | Zamboanga City Medical Center GeneXpert Laboratory                                                | Alethea R. de Guzman; Anna Ong-Lim; Arianne A. Zamora; Benedict A. Maralit; Carlo M. Lapid; Celia Carlos; Cynthia P. Saloma; Devon Ray Pacial; Diomedes A. Carino; Diomedes A. Cariño; Edsel Maurice Salvana; Edsel Maurice Salvaña; El King D. Morado; Elcid Aaron R. Panglinan; Eva Maria Cutiongco-de la Paz; Francis A. Tablizo; Henrietta Marie Rodriguez; Jaime C. Montoya; Jan Michael C. Yap; Jarvin E. Nipales; Jo-Hannah S. Llamas; John Q. Wong; Joshua Gregor A. Dizon; Juan Antonio R. Magalang; Karol Sophia Agape R. Padilla; Kenneth M. Kim; Kris P. Punayan; Kristina Patriz Dela Cruz; Kristina Patriz Dela Cruz; Lindsay Claire D.L. Carandang; Lindsay Clare D.L. Carandang; Ma. Exanil Plantig; Marc Edsel C. Ayes; Maria Rosario Singh-Vergeire; Maria Rosario Singh-Vergeire and Cynthia P. Saloma; Maria Sofia L. Yangzon; Marielle M Gamboa; Marissa Alejandria; Nina Francesca Bustamante; Niña Francesca Bustamante; Razel Nikka M. Hao; Renato Jacinto Q. Mantaring; Rianna Patricia S. Cruz; Sheila Mae M. Araiza; Yvonne Valerie Austria; Zipporah Mariebelle R. Enriquez; Zyrel V. Mollejon |  |  |  |
| EPI_ISL_2859137, EPI_ISL_2859144, EPI_ISL_2859169, EPI_ISL_2859171, EPI_ISL_2859175, EPI_ISL_2859176, EPI_ISL_2859192, EPI_ISL_2859218, EPI_ISL_2859260, EPI_ISL_2859270, EPI_ISL_2859304, EPI_ISL_2859344, EPI_ISL_2859345, EPI_ISL_2859381, EPI_ISL_2860218, EPI_ISL_4713933, EPI_ISL_4714047, EPI_ISL_4714136, EPI_ISL_4714399, EPI_ISL_4714861, EPI_ISL_4714907, EPI_ISL_4714947, EPI_ISL_4715198, EPI_ISL_4715205, EPI_ISL_4715833, EPI_ISL_4715859, EPI_ISL_4716170, EPI_ISL_4716242, EPI_ISL_4716469, EPI_ISL_4716498, EPI_ISL_4716557, EPI_ISL_4716570, EPI_ISL_4716593, EPI_ISL_4716633, EPI_ISL_4716685, EPI_ISL_4716764, EPI_ISL_4716797, EPI_ISL_4716812, EPI_ISL_4716854, EPI_ISL_4716867, EPI_ISL_4716870, EPI_ISL_4716882, EPI_ISL_4716899, EPI_ISL_4716938, EPI_ISL_4716941, EPI_ISL_4716947, EPI_ISL_4716959, EPI_ISL_4716964, EPI_ISL_4716987, EPI_ISL_4716997, EPI_ISL_4717007, EPI_ISL_4717026, EPI_ISL_4717032, EPI_ISL_4717038, EPI_ISL_4717039, EPI_ISL_4717045, EPI_ISL_4717087, EPI_ISL_4717096, EPI_ISL_4717112, EPI_ISL_4717118, EPI_ISL_4717162, EPI_ISL_4717179, EPI_ISL_4717200, EPI_ISL_4717274, EPI_ISL_4717293, EPI_ISL_4717300, EPI_ISL_4717307, EPI_ISL_4717314, EPI_ISL_4717329, EPI_ISL_4717351, EPI_ISL_4717352, EPI_ISL_4717379, EPI_ISL_4717383, EPI_ISL_4717402, EPI_ISL_4717411, EPI_ISL_4717426, EPI_ISL_4717448 | see above                                                          | Zamboanga City Medical Center-Department of Agriculture Satellite Laboratory for COVID-19 Testing | Alethea R. de Guzman; Anna Ong-Lim; Arianne A. Zamora; Benedict A. Maralit; Carlo M. Lapid; Celia Carlos; Cynthia P. Saloma; Devon Ray Pacial; Diomedes A. Carino; Diomedes A. Cariño; Edsel Maurice Salvana; Edsel Maurice Salvaña; El King D. Morado; Elcid Aaron R. Panglinan; Eva Maria Cutiongco-de la Paz; Francis A. Tablizo; Henrietta Marie Rodriguez; Jaime C. Montoya; Jan Michael C. Yap; Jarvin E. Nipales; Jo-Hannah S. Llamas; John Q. Wong; Joshua Gregor A. Dizon; Juan Antonio R. Magalang; Karol Sophia Agape R. Padilla; Kenneth M. Kim; Kris P. Punayan; Kristina Patriz Dela Cruz; Kristina Patriz Dela Cruz; Lindsay Claire D.L. Carandang; Lindsay Clare D.L. Carandang; Ma. Exanil Plantig; Marc Edsel C. Ayes; Maria Rosario Singh-Vergeire; Maria Rosario Singh-Vergeire and Cynthia P. Saloma; Maria Sofia L. Yangzon; Marielle M Gamboa; Marissa Alejandria; Nina Francesca Bustamante; Niña Francesca Bustamante; Razel Nikka M. Hao; Renato Jacinto Q. Mantaring; Rianna Patricia S. Cruz; Sheila Mae M. Araiza; Yvonne Valerie Austria; Zipporah Mariebelle R. Enriquez; Zyrel V. Mollejon |  |  |  |
| EPI_ISL_2859281, EPI_ISL_2859285, EPI_ISL_2859287, EPI_ISL_2859289, EPI_ISL_2859297, EPI_ISL_4713887, EPI_ISL_4714117, EPI_ISL_4714140, EPI_ISL_4714158, EPI_ISL_4714951, EPI_ISL_4715482                                                                                                                                                                                                                                                                                                                                                                                                                                                                                                                                                                                                                                                                                                                                                                                                                                                                                                                                                                                                                                                                                                                                                                   | see above                                                          | Zamboanga Del Sur Medical Center PCR Laboratory                                                   | Alethea R. de Guzman; Anna Ong-Lim; Arianne A. Zamora; Benedict A. Maralit; Carlo M. Lapid; Celia Carlos; Cynthia P. Saloma; Devon Ray Pacial; Diomedes A. Carino; Diomedes A. Cariño; Edsel Maurice Salvana; Edsel Maurice Salvaña; El King D. Morado; Elcid Aaron R. Panglinan; Eva Maria Cutiongco-de la Paz; Francis A. Tablizo; Henrietta Marie Rodriguez; Jaime C. Montoya; Jan Michael C. Yap; Jarvin E. Nipales; Jo-Hannah S. Llamas; John Q. Wong; Joshua Gregor A. Dizon; Juan Antonio R. Magalang; Karol Sophia Agape R. Padilla; Kenneth M. Kim; Kris P. Punayan; Kristina Patriz Dela Cruz; Kristina Patriz Dela Cruz; Lindsay Claire D.L. Carandang; Lindsay Clare D.L. Carandang; Ma. Exanil Plantig; Marc Edsel C. Ayes; Maria Rosario Singh-Vergeire; Maria Rosario Singh-Vergeire and Cynthia P. Saloma; Maria Sofia L. Yangzon; Marielle M Gamboa; Marissa Alejandria; Nina Francesca Bustamante; Niña Francesca Bustamante; Razel Nikka M. Hao; Renato Jacinto Q. Mantaring; Rianna Patricia S. Cruz; Sheila Mae M. Araiza; Yvonne Valerie Austria; Zipporah Mariebelle R. Enriquez; Zyrel V. Mollejon |  |  |  |

We gratefully acknowledge the following Authors from the Originating laboratories responsible for obtaining the specimens, as well as the Submitting laboratories where the genome data were generated and shared via GISAID, on which this research is based.

All Submitters of data may be contacted directly via [www.gisaid.org](http://www.gisaid.org)

Authors are sorted alphabetically.

| Accession ID                                                                                                                                                                                                                                                                                                                                                                                                                                                                                   | Originating Laboratory                                                                          | Submitting Laboratory                                                                             | Authors                                                                                                                                                                                                                               |
|------------------------------------------------------------------------------------------------------------------------------------------------------------------------------------------------------------------------------------------------------------------------------------------------------------------------------------------------------------------------------------------------------------------------------------------------------------------------------------------------|-------------------------------------------------------------------------------------------------|---------------------------------------------------------------------------------------------------|---------------------------------------------------------------------------------------------------------------------------------------------------------------------------------------------------------------------------------------|
| EPI_ISL_2592630, EPI_ISL_2593764, EPI_ISL_2595725, EPI_ISL_2595726, EPI_ISL_2595860, EPI_ISL_2596341, EPI_ISL_2596803, EPI_ISL_2597228, EPI_ISL_2597229, EPI_ISL_2597312, EPI_ISL_2612300                                                                                                                                                                                                                                                                                                      |                                                                                                 |                                                                                                   |                                                                                                                                                                                                                                       |
| see above                                                                                                                                                                                                                                                                                                                                                                                                                                                                                      | DSMRC                                                                                           | DSMRC                                                                                             | Khine Zaw Oo; Ko Ko Lwin; Ko Ko Win; Kyee Myint; Nay Myo Aung; Pai Khant Kyaw; Phyo Kyaw Aung; Thet Wai Oo; Zaw Win Htun                                                                                                              |
| EPI_ISL_833041                                                                                                                                                                                                                                                                                                                                                                                                                                                                                 | Defence Services Medical Research Center, Biological Research Laboratory                        | Defence Services Medical Research Center, Biological Research Laboratory                          | Khine Zaw Oo; Ko Ko Lwin; Ko Ko Win; Kyaw Wanna; Kyee Myint; Nay Myo Aung; Phyo Kyaw Aung; Sat Paing Htoo; Thein Zaw; Zaw Win Htun                                                                                                    |
| EPI_ISL_896572, EPI_ISL_896573, EPI_ISL_896574, EPI_ISL_896575, EPI_ISL_896576, EPI_ISL_896577, EPI_ISL_896578, EPI_ISL_896579, EPI_ISL_896580, EPI_ISL_896581, EPI_ISL_896582, EPI_ISL_896583, EPI_ISL_896584, EPI_ISL_896585, EPI_ISL_896586, EPI_ISL_896587, EPI_ISL_896588, EPI_ISL_896589, EPI_ISL_896590, EPI_ISL_896591, EPI_ISL_896592, EPI_ISL_896593, EPI_ISL_896594, EPI_ISL_896595, EPI_ISL_896596, EPI_ISL_896597, EPI_ISL_896598, EPI_ISL_896599, EPI_ISL_896600, EPI_ISL_896601 |                                                                                                 |                                                                                                   |                                                                                                                                                                                                                                       |
| see above                                                                                                                                                                                                                                                                                                                                                                                                                                                                                      | Department of Medical Research                                                                  | DMR                                                                                               | Myat Htut Nyunt                                                                                                                                                                                                                       |
| EPI_ISL_512844                                                                                                                                                                                                                                                                                                                                                                                                                                                                                 | Department of Medical Research                                                                  | DMR_Myanmar                                                                                       | Aung Kyaw Kyaw; Aung Zaw Latt; Hlaing Myat Thu; Hnin Ohnmar Soe; Htin Lin; Kay Thi Aye; Lai Lai San; Myat Htut Nyunt; Nan Aye Thida Oo; Ni Ni Zaw; Phyu Win Ei; Su Mon Win; Theingi Win Myat; Wah Wah Aung; Yi Yi Kyaw; Zaw Than Htun |
| EPI_ISL_3246035, EPI_ISL_3246036, EPI_ISL_3246037, EPI_ISL_3246038, EPI_ISL_3246039, EPI_ISL_3246040, EPI_ISL_3246041, EPI_ISL_3246042, EPI_ISL_3246043, EPI_ISL_3246044, EPI_ISL_3246045, EPI_ISL_3246046, EPI_ISL_3246047                                                                                                                                                                                                                                                                    |                                                                                                 |                                                                                                   |                                                                                                                                                                                                                                       |
| see above                                                                                                                                                                                                                                                                                                                                                                                                                                                                                      | Myanmar                                                                                         | National Institute of Health, Department of Medical Sciences, Ministry of Public Health, Thailand | ; Natchaya Khiadsang; Nuttida Thongpramul; Pakorn Piromtong; Pilailuk Okada; Ratana Tacharoenmuang; Siripaporn Phuygun; Sittiporn Parmmen; Sunthareeya Waicharoen; Thanutsapa Thanadachakul; Warawan Wongboot; sirikanda wimol        |
| EPI_ISL_3252972, EPI_ISL_3252973, EPI_ISL_3252974, EPI_ISL_3252975, EPI_ISL_3252976, EPI_ISL_3252977, EPI_ISL_3252978, EPI_ISL_3252979, EPI_ISL_3252980, EPI_ISL_3252981                                                                                                                                                                                                                                                                                                                       |                                                                                                 |                                                                                                   |                                                                                                                                                                                                                                       |
| see above                                                                                                                                                                                                                                                                                                                                                                                                                                                                                      | National Health Laboratory, Ministry Of Health And Sports, The Republic Of The Union Of Myanmar | Pathogen Genomics Center, National Institute of Infectious Diseases                               | Eh Htoo Pe; Htay Htay Tin; Kentaro Itokawa; Makoto Kuroda; Masanori Hashino; Reiko Saito; Rina Tanaka; Tsuyoshi Sekizuka; Wint Wint Phyu                                                                                              |
| EPI_ISL_849736, EPI_ISL_849737, EPI_ISL_849738, EPI_ISL_849739, EPI_ISL_849740, EPI_ISL_849741, EPI_ISL_849742, EPI_ISL_849743                                                                                                                                                                                                                                                                                                                                                                 |                                                                                                 |                                                                                                   |                                                                                                                                                                                                                                       |
| see above                                                                                                                                                                                                                                                                                                                                                                                                                                                                                      | Special Operations Medical Research Division, Defence Services Medical Research Centre          | Special Operations Medical Research Division, Defence Services Medical Research Centre            | Aung; Htun; K.K.; K.Z.; Lwin; Myint, K.; N.M.; Oo; P.K.; Win; Z.W.; Zaw, T.                                                                                                                                                           |
| EPI_ISL_434709                                                                                                                                                                                                                                                                                                                                                                                                                                                                                 | unknown                                                                                         | National Institute of Health. Department of medical Sciences, Ministry of Public Health, Thailand | Chittaganpitch; Malinee; Okada; Parmmen; Phuygun; Pilailuk; Siripaporn; Sittiporn; Sunthareeya; Thanadachakul; Thanutsapa; Waicharoen; Warawan; Wongboot                                                                              |





|                                                                                                                                                                                                                                                                                                                                   |                                                                                                                                |                                                                                                                                                                                                         |                                                                                                                                                                                                                                                                                           |
|-----------------------------------------------------------------------------------------------------------------------------------------------------------------------------------------------------------------------------------------------------------------------------------------------------------------------------------|--------------------------------------------------------------------------------------------------------------------------------|---------------------------------------------------------------------------------------------------------------------------------------------------------------------------------------------------------|-------------------------------------------------------------------------------------------------------------------------------------------------------------------------------------------------------------------------------------------------------------------------------------------|
| EPI_ISL_4101596, EPI_ISL_4236995, EPI_ISL_4236997                                                                                                                                                                                                                                                                                 |                                                                                                                                |                                                                                                                                                                                                         |                                                                                                                                                                                                                                                                                           |
| EPI_ISL_3980747, EPI_ISL_3980748, EPI_ISL_3980750, EPI_ISL_3980751, EPI_ISL_3980752, EPI_ISL_3980753, EPI_ISL_3980754, EPI_ISL_4565007, EPI_ISL_4565008, EPI_ISL_4565009, EPI_ISL_4565010, EPI_ISL_4565011, EPI_ISL_4565012                                                                                                       |                                                                                                                                |                                                                                                                                                                                                         |                                                                                                                                                                                                                                                                                           |
| see above                                                                                                                                                                                                                                                                                                                         | HRPB, Ipoh                                                                                                                     | Tropical Infectious Diseases Research & Education Centre (TIDREC), Universiti Malaya                                                                                                                    | AsmaAnati CheMatSeri; Che-Norainon Yaacob; Jia-Yi Tan; Jo-Ern Wong; Kim-Kee Tan; Mulya-Mustika-Sari Zulkifli; Noor Syahida Azizan; Nur-Hidayana Mahfodz; Sazaly AbuBakar; Siti-Sarah Nor'e                                                                                                |
| EPI_ISL_1196864                                                                                                                                                                                                                                                                                                                   | Hospital Alor Gajah                                                                                                            | Institute for Medical Research, Infectious Disease Research Centre, National Institutes of Health, Ministry of Health Malaysia                                                                          | Kamel K; Mohd Zawawi Z; Ramly N; Robert F; Suppiah J; Thayan R                                                                                                                                                                                                                            |
| EPI_ISL_4557932, EPI_ISL_4557933, EPI_ISL_4557934, EPI_ISL_4557942, EPI_ISL_4557943, EPI_ISL_4557944, EPI_ISL_4557945, EPI_ISL_4557946, EPI_ISL_4557947, EPI_ISL_4557948, EPI_ISL_4557949, EPI_ISL_4557950, EPI_ISL_4557951                                                                                                       |                                                                                                                                |                                                                                                                                                                                                         |                                                                                                                                                                                                                                                                                           |
| see above                                                                                                                                                                                                                                                                                                                         | Hospital Ampang                                                                                                                | Malaysia Genome Institute                                                                                                                                                                               | Azrin Ahmad; Enizza Kasim; Irni Suhayu Sopian; Mohd Faizal Abu Bakar; Mohd Ghows Mohd Azzam.; Mohd Noor Mat Isa; Nor Azfa Johari; Nurhezreen Md Iqbal; Shamsidar Sopie; Siti Noraini Othman; Yusuf Muhammad Noor                                                                          |
| EPI_ISL_2727836                                                                                                                                                                                                                                                                                                                   | Hospital Angkatan Tentera Kota Kinabalu                                                                                        | Institute for Medical Research, Infectious Disease Research Centre, National Institutes of Health, Ministry of Health Malaysia                                                                          | Azizan MA; Kamel K; Mohd Zawawi Z; Ramly N; Robert F; Suppiah J; Thayan R                                                                                                                                                                                                                 |
| EPI_ISL_2727837                                                                                                                                                                                                                                                                                                                   | Hospital Angkatan Tentera Wilayah Kota Kinabalu                                                                                | Institute for Medical Research, Infectious Disease Research Centre, National Institutes of Health, Ministry of Health Malaysia                                                                          | Azizan MA; Kamel K; Mohd Zawawi Z; Ramly N; Robert F; Suppiah J; Thayan R                                                                                                                                                                                                                 |
| EPI_ISL_3980749                                                                                                                                                                                                                                                                                                                   | Hospital Batu Gajah                                                                                                            | Tropical Infectious Diseases Research & Education Centre (TIDREC), Universiti Malaya                                                                                                                    | AsmaAnati CheMatSeri; Che-Norainon Yaacob; Jia-Yi Tan; Jo-Ern Wong; Kim-Kee Tan; Mulya-Mustika-Sari Zulkifli; Noor Syahida Azizan; Nur-Hidayana Mahfodz; Sazaly AbuBakar; Siti-Sarah Nor'e                                                                                                |
| EPI_ISL_4513510                                                                                                                                                                                                                                                                                                                   | Hospital Canselor Tuanku Muhriz (HCTM)                                                                                         | UKM Medical Molecular Biology Institute (UMBI)                                                                                                                                                          | Mira Farzana binti Mohamad Mokhtar                                                                                                                                                                                                                                                        |
| EPI_ISL_4463193, EPI_ISL_4463194, EPI_ISL_4463195                                                                                                                                                                                                                                                                                 | Hospital Canselor Tuanku Muhriz UKM                                                                                            | UKM Medical Molecular Biology Institute (UMBI)                                                                                                                                                          | Nur Alyaa Afifah Md Shahri                                                                                                                                                                                                                                                                |
| EPI_ISL_936494                                                                                                                                                                                                                                                                                                                    | Hospital Enche Besar Hajjah Khalsom Kluang                                                                                     | Institute for Medical Research, Infectious Disease Research Centre, National Institutes of Health, Ministry of Health Malaysia                                                                          | Azizan MA; Kamel K; Suppiah J; Thayan R                                                                                                                                                                                                                                                   |
| EPI_ISL_4122511, EPI_ISL_4435515, EPI_ISL_4435516, EPI_ISL_4435518, EPI_ISL_4435519                                                                                                                                                                                                                                               | Hospital Kepala Batas                                                                                                          | iPROMISE, UiTM                                                                                                                                                                                          | Ariza Adnan; Fadzilah Mohd Nor; Lim Wai Feng; Mohd Asif Mohd Sukri; Mohd Nur Fakhruzzaman Noorizhab; Mohd Zaki Salleh; Sazzli Shahlan Kassim; Siti Farah Alwani Mohd Naw; Siti Hamimah Sheikh Abdul Kadir; Teh Lay Kek; Wang Seok Mui                                                     |
| EPI_ISL_4557935, EPI_ISL_4601559                                                                                                                                                                                                                                                                                                  | Hospital Kuala Lumpur                                                                                                          | Malaysia Genome Institute                                                                                                                                                                               | Azrin Ahmad; Enizza Kasim; Irni Suhayu Sopian; Mohd Faizal Abu Bakar; Mohd Ghows Mohd Azzam.; Mohd Noor Mat Isa; Nor Azfa Johari; Nurhezreen Md Iqbal; Shamsidar Sopie; Siti Noraini Othman; Yusuf Muhammad Noor                                                                          |
| EPI_ISL_2233382, EPI_ISL_2550733                                                                                                                                                                                                                                                                                                  | Hospital Labuan                                                                                                                | Institute for Medical Research, Infectious Disease Research Centre, National Institutes of Health, Ministry of Health Malaysia                                                                          | Azizan MA; Kamel K; Mohd Zawawi Z; Ramly N; Robert F; Suppiah J; Thayan R                                                                                                                                                                                                                 |
| EPI_ISL_1673257                                                                                                                                                                                                                                                                                                                   | Hospital Lahad Datu                                                                                                            | Institute for Medical Research, Infectious Disease Research Centre, National Institutes of Health, Ministry of Health Malaysia<br>Jalan Setia Murni U13/52, Bandar Setia Alam, 40170 Selangor, Malaysia | Kamel K; Mohd Zawawi Z; Suppiah J; Thayan R                                                                                                                                                                                                                                               |
| EPI_ISL_4601565, EPI_ISL_4601570, EPI_ISL_4601571, EPI_ISL_4601579                                                                                                                                                                                                                                                                | Hospital Lahad Datu                                                                                                            | Malaysia Genome Institute                                                                                                                                                                               | Azrin Ahmad; Enizza Kasim; Irni Suhayu Sopian; Mohd Faizal Abu Bakar; Mohd Ghows Mohd Azzam.; Mohd Noor Mat Isa; Nor Azfa Johari; Nurhezreen Md Iqbal; Shamsidar Sopie; Siti Noraini Othman; Yusuf Muhammad Noor                                                                          |
| EPI_ISL_2379461                                                                                                                                                                                                                                                                                                                   | Hospital Melaka                                                                                                                | Institute for Medical Research, Infectious Disease Research Centre, National Inst                                                                                                                       | Azizan MA; Kamel K; Mohd Zawawi Z; Ramly N; Robert F; Suppiah J; Thayan R                                                                                                                                                                                                                 |
| EPI_ISL_1196660, EPI_ISL_1196705, EPI_ISL_1196706, EPI_ISL_1196768, EPI_ISL_1196770, EPI_ISL_1196771                                                                                                                                                                                                                              | Hospital Melaka                                                                                                                | Institute for Medical Research, Infectious Disease Research Centre, National Institutes of Health, Ministry of Health Malaysia                                                                          | Kamel K; Mohd Zawawi Z; Ramly N; Robert F; Suppiah J; Thayan R                                                                                                                                                                                                                            |
| EPI_ISL_4513497                                                                                                                                                                                                                                                                                                                   | Hospital Melaka                                                                                                                | UKM Medical Molecular Biology Institute (UMBI)                                                                                                                                                          | Mira Farzana binti Mohamad Mokhtar                                                                                                                                                                                                                                                        |
| EPI_ISL_4122275                                                                                                                                                                                                                                                                                                                   | Hospital P. Pinang                                                                                                             | iPROMISE, UiTM                                                                                                                                                                                          | Ariza Adnan; Fadzilah Mohd Nor; Lim Wai Feng; Mohd Asif Mohd Sukri; Mohd Nur Fakhruzzaman Noorizhab; Mohd Zaki Salleh; Sazzli Shahlan Kassim; Siti Farah Alwani Mohd Naw; Siti Hamimah Sheikh Abdul Kadir; Teh Lay Kek; Wang Seok Mui                                                     |
| EPI_ISL_1673337                                                                                                                                                                                                                                                                                                                   | Hospital Pakar Sultanah Fatimah                                                                                                | Institute for Medical Research, Infectious Disease Research Centre, National Institutes of Health, Ministry of Health Malaysia                                                                          | Kamel K; Mohd Zawawi Z; Suppiah J; Thayan R                                                                                                                                                                                                                                               |
| EPI_ISL_1196794, EPI_ISL_1196796, EPI_ISL_1196797                                                                                                                                                                                                                                                                                 | Hospital Pulau Pinang                                                                                                          | Institute for Medical Research, Infectious Disease Research Centre, National Institutes of Health, Ministry of Health Malaysia                                                                          | Kamel K; Mohd Zawawi Z; Ramly N; Robert F; Suppiah J; Thayan R                                                                                                                                                                                                                            |
| EPI_ISL_936488, EPI_ISL_1186114, EPI_ISL_1405917                                                                                                                                                                                                                                                                                  | Hospital Queen Elizabeth                                                                                                       | Institute for Medical Research, Infectious Disease Research Centre, National Institutes of Health, Ministry of Health Malaysia                                                                          | Azizan MA; Kamel K; Mohd Zawawi Z; Ramly N; Robert F; Suppiah J; Thayan R                                                                                                                                                                                                                 |
| EPI_ISL_4601560                                                                                                                                                                                                                                                                                                                   | Hospital Queen Elizabeth 2                                                                                                     | Malaysia Genome Institute                                                                                                                                                                               | Azrin Ahmad; Enizza Kasim; Irni Suhayu Sopian; Mohd Faizal Abu Bakar; Mohd Ghows Mohd Azzam.; Mohd Noor Mat Isa; Nor Azfa Johari; Nurhezreen Md Iqbal; Shamsidar Sopie; Siti Noraini Othman; Yusuf Muhammad Noor                                                                          |
| EPI_ISL_936489                                                                                                                                                                                                                                                                                                                    | Hospital Raja Perempuan Zainab II                                                                                              | Institute for Medical Research, Infectious Disease Research Centre, National Institutes of Health, Ministry of Health Malaysia                                                                          | Azizan MA; Kamel K; Suppiah J; Thayan R                                                                                                                                                                                                                                                   |
| EPI_ISL_2429132                                                                                                                                                                                                                                                                                                                   | Hospital Raja Permaisuri Bainun                                                                                                | Institute for Medical Research, Infectious Disease Research Centre, National Institutes of Health, Ministry of Health Malaysia                                                                          | Azizan MA; Kamel K; Mohd Zawawi Z; Ramly N; Robert F; Suppiah J; Thayan R                                                                                                                                                                                                                 |
| EPI_ISL_1673288                                                                                                                                                                                                                                                                                                                   | Hospital Segamat Johor                                                                                                         | Institute for Medical Research, Infectious Disease Research Centre, National Institutes of Health, Ministry of Health Malaysia                                                                          | Kamel K; Mohd Zawawi Z; Suppiah J; Thayan R                                                                                                                                                                                                                                               |
| EPI_ISL_4601580                                                                                                                                                                                                                                                                                                                   | Hospital Selayang                                                                                                              | Malaysia Genome Institute                                                                                                                                                                               | Azrin Ahmad; Enizza Kasim; Irni Suhayu Sopian; Mohd Faizal Abu Bakar; Mohd Ghows Mohd Azzam.; Mohd Noor Mat Isa; Nor Azfa Johari; Nurhezreen Md Iqbal; Shamsidar Sopie; Siti Noraini Othman; Yusuf Muhammad Noor                                                                          |
| EPI_ISL_3769378                                                                                                                                                                                                                                                                                                                   | Hospital Serdang                                                                                                               | iPROMISE, UiTM                                                                                                                                                                                          | Ariza Adnan; Fadzilah Mohd Nor; Lim Wai Feng; Mohd Asif Mohd Sukri; Mohd Nur Fakhruzzaman Noorizhab; Mohd Zaki Salleh; Sazzli Shahlan Kassim; Siti Farah Alwani Mohd Naw; Siti Hamimah Sheikh Abdul Kadir; Teh Lay Kek; Wang Seok Mui                                                     |
| EPI_ISL_1673280                                                                                                                                                                                                                                                                                                                   | Hospital Sultan Ismail                                                                                                         | Institute for Medical Research, Infectious Disease Research Centre, National Institutes of Health, Ministry of Health Malaysia                                                                          | Kamel K; Mohd Zawawi Z; Suppiah J; Thayan R                                                                                                                                                                                                                                               |
| EPI_ISL_1673283                                                                                                                                                                                                                                                                                                                   | Hospital Sultanah Aminah                                                                                                       | Institute for Medical Research, Infectious Disease Research Centre, National Institutes of Health, Ministry of Health Malaysia                                                                          | Kamel K; Mohd Zawawi Z; Suppiah J; Thayan R                                                                                                                                                                                                                                               |
| EPI_ISL_1673284                                                                                                                                                                                                                                                                                                                   | Hospital Sultanah Nora Ismail                                                                                                  | Institute for Medical Research, Infectious Disease Research Centre, National Institutes of Health, Ministry of Health Malaysia                                                                          | Kamel K; Mohd Zawawi Z; Suppiah J; Thayan R                                                                                                                                                                                                                                               |
| EPI_ISL_4101581                                                                                                                                                                                                                                                                                                                   | Hospital Sultanah Nora Ismail                                                                                                  | UKM Medical Molecular Biology Institute (UMBI)                                                                                                                                                          | Nur Alyaa Afifah Md Shahri                                                                                                                                                                                                                                                                |
| EPI_ISL_2650001, EPI_ISL_2650002                                                                                                                                                                                                                                                                                                  | Hospital Sultanah Nur Zahirah Kuala Terengganu                                                                                 | Institute for Medical Research, Infectious Disease Research Centre, National Institutes of Health, Ministry of Health Malaysia                                                                          | Azizan MA; Kamel K; Mohd Zawawi Z; Ramly N; Robert F; Suppiah J; Thayan R                                                                                                                                                                                                                 |
| EPI_ISL_4557928, EPI_ISL_4557929, EPI_ISL_4557930, EPI_ISL_4557931, EPI_ISL_4557936, EPI_ISL_4557937, EPI_ISL_4557938, EPI_ISL_4557939, EPI_ISL_4557940, EPI_ISL_4557941, EPI_ISL_4557955, EPI_ISL_4558235, EPI_ISL_4558236, EPI_ISL_4601572, EPI_ISL_4601573, EPI_ISL_4601574, EPI_ISL_4601575, EPI_ISL_4601576, EPI_ISL_4601577 |                                                                                                                                |                                                                                                                                                                                                         |                                                                                                                                                                                                                                                                                           |
| see above                                                                                                                                                                                                                                                                                                                         | Hospital Sungai Buloh                                                                                                          | Malaysia Genome Institute                                                                                                                                                                               | Azrin Ahmad; Enizza Kasim; Irni Suhayu Sopian; Mohd Faizal Abu Bakar; Mohd Ghows Mohd Azzam.; Mohd Noor Mat Isa; Nor Azfa Johari; Nurhezreen Md Iqbal; Shamsidar Sopie; Siti Noraini Othman; Yusuf Muhammad Noor                                                                          |
| EPI_ISL_1673309                                                                                                                                                                                                                                                                                                                   | Hospital Temenggong Seri Maharaja Tun Ibrahim                                                                                  | Institute for Medical Research, Infectious Disease Research Centre, National Institutes of Health, Ministry of Health Malaysia                                                                          | Kamel K; Mohd Zawawi Z; Suppiah J; Thayan R                                                                                                                                                                                                                                               |
| EPI_ISL_2549576                                                                                                                                                                                                                                                                                                                   | Hospital Tuanku Fauziah                                                                                                        | Institute for Medical Research, Infectious Disease Research Centre, National Institutes of Health, Ministry of Health Malaysia                                                                          | Azizan MA; Kamel K; Mohd Zawawi Z; Ramly N; Robert F; Suppiah J; Thayan R                                                                                                                                                                                                                 |
| EPI_ISL_2620716                                                                                                                                                                                                                                                                                                                   | Hospital Tuanku Fauziah, Kangar                                                                                                | Institute for Medical Research, Infectious Disease Research Centre, National Institutes of Health, Ministry of Health                                                                                   | Azizan MA; Kamel K; Mohd Zawawi Z; Ramly N; Robert F; Suppiah J; Thayan R                                                                                                                                                                                                                 |
| EPI_ISL_2620715                                                                                                                                                                                                                                                                                                                   | Hospital Tuanku Fauziah, Kangar                                                                                                | Institute for Medical Research, Infectious Disease Research Centre, National Institutes of Health, Ministry of Health Malaysia                                                                          | Azizan MA; Kamel K; Mohd Zawawi Z; Ramly N; Robert F; Suppiah J; Thayan R                                                                                                                                                                                                                 |
| EPI_ISL_1672633                                                                                                                                                                                                                                                                                                                   | Hospital Tuanku Jaafar Seremban                                                                                                | Institute for Medical Research, Infectious Disease Research Centre, National Institutes of Health, Ministry of Health Malaysia                                                                          | Kamel K; Mohd Zawawi Z; Suppiah J; Thayan R                                                                                                                                                                                                                                               |
| EPI_ISL_4101584                                                                                                                                                                                                                                                                                                                   | Hospital Tuanku Jaafar Seremban                                                                                                | UKM Medical Molecular Biology Institute (UMBI)                                                                                                                                                          | Nur Alyaa Afifah Md Shahri                                                                                                                                                                                                                                                                |
| EPI_ISL_2650003                                                                                                                                                                                                                                                                                                                   | Hospital Wanita Dan Kanak-Kanak Sabah                                                                                          | Institute for Medical Research, Infectious Disease Research Centre, National Institutes of Health, Ministry of Health Malaysia                                                                          | 40170 Selangor; Bandar Setia Alam; Jalan Setia Murni U13/52; Malaysia                                                                                                                                                                                                                     |
| EPI_ISL_3762499                                                                                                                                                                                                                                                                                                                   | Hulu Perak District Health Office                                                                                              | Institute for Medical Research, Infectious Disease Research Centre, National Institutes of Health, Ministry of Health Malaysia                                                                          | Anasir Mi; Azizan MA; Kamel K; Mohd Zawawi Z; Ramly N; Robert F; Suppiah J; Thayan R                                                                                                                                                                                                      |
| EPI_ISL_4101580                                                                                                                                                                                                                                                                                                                   | ICU Dahlia Hospital Melaka                                                                                                     | UKM Medical Molecular Biology Institute (UMBI)                                                                                                                                                          | Nur Alyaa Afifah Md Shahri                                                                                                                                                                                                                                                                |
| EPI_ISL_3945545, EPI_ISL_3945546, EPI_ISL_3945547, EPI_ISL_3945548, EPI_ISL_3945549, EPI_ISL_4071977, EPI_ISL_4071978, EPI_ISL_4071979, EPI_ISL_4071980, EPI_ISL_4071981, EPI_ISL_4071983, EPI_ISL_4071984                                                                                                                        |                                                                                                                                |                                                                                                                                                                                                         |                                                                                                                                                                                                                                                                                           |
| see above                                                                                                                                                                                                                                                                                                                         | Institut Biologi Molekul Perubatan UKM                                                                                         | UKM Medical Molecular Biology Institute (UMBI)                                                                                                                                                          | Mira Farzana binti Mohamad Mokhtar; Nur Alyaa Afifah Md Shahri                                                                                                                                                                                                                            |
| EPI_ISL_455790, EPI_ISL_455791, EPI_ISL_455792, EPI_ISL_455793                                                                                                                                                                                                                                                                    | Institute for Medical Research, Infectious Disease Research Centre, National Institutes of Health, Ministry of Health Malaysia | Malaysia Genome Institute                                                                                                                                                                               | Azrin Ahmad; Enizza Kasim; Irni Suhayu Sopian; Jayanthi Suppiah; Mohd Faizal Abu Bakar; Mohd Noor Mat Isa; Norazah Ahmad; Nurhezreen Md Iqbal; Ravindran Thayan; Shahrul Hisham Zainal Ariffin; Shamsidar Sopie; Siti Noraini Othman; Tahir Aris; Yusuf Muhammad Noor; Zarina Mohd Zawawi |
| EPI_ISL_430439                                                                                                                                                                                                                                                                                                                    | Institute for Medical Research, Infectious Disease Research Centre, National Institutes of Health, Ministry of Health Malaysia | Institute for Medical Research Infectious Disease Research Centre, National Institutes of Health, Ministry of Health Malaysia                                                                           | Abdul-Wahid.M-Z; Ahmad.N; Azizan.M-A; Hisham.H-A; Kalyanasundram.J; Mat-Sharani.S; Mohd-Zain.R; Mohd-Zawawi.Z; Suppiah.J; Tan.L-P; Thayan.R                                                                                                                                               |



|                                                                                                                                                                                                                                                                                                                                                                                                                                                                                                                                                                                                                                                                                                                                                                                                                                                                                                                                                                                                                                                                                                                                                                                                                                                                                            |                                                                                                                                                            |                                                                                                                                |                                                                                                                                                                                                                                                                                                                                                                                                                                                                                                                                                                                                                                                                                                |
|--------------------------------------------------------------------------------------------------------------------------------------------------------------------------------------------------------------------------------------------------------------------------------------------------------------------------------------------------------------------------------------------------------------------------------------------------------------------------------------------------------------------------------------------------------------------------------------------------------------------------------------------------------------------------------------------------------------------------------------------------------------------------------------------------------------------------------------------------------------------------------------------------------------------------------------------------------------------------------------------------------------------------------------------------------------------------------------------------------------------------------------------------------------------------------------------------------------------------------------------------------------------------------------------|------------------------------------------------------------------------------------------------------------------------------------------------------------|--------------------------------------------------------------------------------------------------------------------------------|------------------------------------------------------------------------------------------------------------------------------------------------------------------------------------------------------------------------------------------------------------------------------------------------------------------------------------------------------------------------------------------------------------------------------------------------------------------------------------------------------------------------------------------------------------------------------------------------------------------------------------------------------------------------------------------------|
| EPI_ISL_4101558                                                                                                                                                                                                                                                                                                                                                                                                                                                                                                                                                                                                                                                                                                                                                                                                                                                                                                                                                                                                                                                                                                                                                                                                                                                                            | Kinabatangan Center For Disease Control                                                                                                                    | Institute for Medical Research, Infectious Disease Research Centre, National Institutes of Health, Ministry of Health Malaysia | Ahmad FA; Ahmad Fazilah NA; Anasir MI; Azizan MA; Kamel K; Mohd Zawawi Z; Norhisham SN; Ramly N; Robert F; Suppiah J; Thayan R                                                                                                                                                                                                                                                                                                                                                                                                                                                                                                                                                                 |
| EPI_ISL_4565047                                                                                                                                                                                                                                                                                                                                                                                                                                                                                                                                                                                                                                                                                                                                                                                                                                                                                                                                                                                                                                                                                                                                                                                                                                                                            | Kk badang                                                                                                                                                  | Tropical Infectious Diseases Research & Education Centre (TIDREC), Universiti Malaya                                           | AsmaAnati CheMatSeri; Che-Norainon Yaacob; Jia-Yi Tan; Jo-Ern Wong; Kim-Kee Tan; Mulya-Mustika-Sari Zulkifli; Noor Syahida Azizan; Nur-Hidayana Mahfodz; Szazaly AbuBakar; Siti-Sarah Nor'e                                                                                                                                                                                                                                                                                                                                                                                                                                                                                                    |
| EPI_ISL_1972549, EPI_ISL_1972550                                                                                                                                                                                                                                                                                                                                                                                                                                                                                                                                                                                                                                                                                                                                                                                                                                                                                                                                                                                                                                                                                                                                                                                                                                                           | Klinik Kesihatan Bentong                                                                                                                                   | Institute for Medical Research, Infectious Disease Research Centre, National Institutes of Health, Ministry of Health Malaysia | Azizan MA; Kamel K; Mohd Zawawi Z; Ramly N; Robert F; Suppiah J; Thayan R                                                                                                                                                                                                                                                                                                                                                                                                                                                                                                                                                                                                                      |
| EPI_ISL_1972553                                                                                                                                                                                                                                                                                                                                                                                                                                                                                                                                                                                                                                                                                                                                                                                                                                                                                                                                                                                                                                                                                                                                                                                                                                                                            | Klinik Kesihatan Karak                                                                                                                                     | Institute for Medical Research, Infectious Disease Research Centre, National Institutes of Health, Ministry of Health Malaysia | Azizan MA; Kamel K; Mohd Zawawi Z; Ramly N; Robert F; Suppiah J; Thayan R                                                                                                                                                                                                                                                                                                                                                                                                                                                                                                                                                                                                                      |
| EPI_ISL_3769383                                                                                                                                                                                                                                                                                                                                                                                                                                                                                                                                                                                                                                                                                                                                                                                                                                                                                                                                                                                                                                                                                                                                                                                                                                                                            | Klinik Kesihatan Kuala Perlis                                                                                                                              | IPROMISE, UiTM                                                                                                                 | Ariza Adnan; Fadzilah Mohd Nor; Lim Wai Feng; Mohd Asif Mohd Sukri; Mohd Nur Fakhruzzaman Noorizhab; Mohd Zaki Salleh; Sazzli Shahlan Kassim; Siti Farah Alwani Mohd Nawi; Siti Hamimah Sheikh Abdul Kadir; Teh Lay Kek; Wang Seok Mui                                                                                                                                                                                                                                                                                                                                                                                                                                                         |
| EPI_ISL_1972548, EPI_ISL_1972551, EPI_ISL_1972552                                                                                                                                                                                                                                                                                                                                                                                                                                                                                                                                                                                                                                                                                                                                                                                                                                                                                                                                                                                                                                                                                                                                                                                                                                          | Klinik Kesihatan Lurah Bilut (Felda)                                                                                                                       | Institute for Medical Research, Infectious Disease Research Centre, National Institutes of Health, Ministry of Health Malaysia | Azizan MA; Kamel K; Mohd Zawawi Z; Ramly N; Robert F; Suppiah J; Thayan R                                                                                                                                                                                                                                                                                                                                                                                                                                                                                                                                                                                                                      |
| EPI_ISL_3980724                                                                                                                                                                                                                                                                                                                                                                                                                                                                                                                                                                                                                                                                                                                                                                                                                                                                                                                                                                                                                                                                                                                                                                                                                                                                            | Klinik Kesihatan Padang Rengas                                                                                                                             | Tropical Infectious Diseases Research & Education Centre (TIDREC), Universiti Malaya                                           | AsmaAnati CheMatSeri; Che-Norainon Yaacob; Jia-Yi Tan; Jo-Ern Wong; Kim-Kee Tan; Mulya-Mustika-Sari Zulkifli; Noor Syahida Azizan; Nur-Hidayana Mahfodz; Szazaly AbuBakar; Siti-Sarah Nor'e                                                                                                                                                                                                                                                                                                                                                                                                                                                                                                    |
| EPI_ISL_2811874                                                                                                                                                                                                                                                                                                                                                                                                                                                                                                                                                                                                                                                                                                                                                                                                                                                                                                                                                                                                                                                                                                                                                                                                                                                                            | Klinik Kesihatan Pasir Akar                                                                                                                                | Institute for Medical Research, Infectious Disease Research Centre, National Institutes of Health, Ministry of Health Malaysia | Azizan MA; Kamel K; Mohd Zawawi Z; Ramly N; Robert F; Suppiah J; Thayan R                                                                                                                                                                                                                                                                                                                                                                                                                                                                                                                                                                                                                      |
| EPI_ISL_3762822                                                                                                                                                                                                                                                                                                                                                                                                                                                                                                                                                                                                                                                                                                                                                                                                                                                                                                                                                                                                                                                                                                                                                                                                                                                                            | Kluang District Health Office                                                                                                                              | Institute for Medical Research, Infectious Disease Research Centre, National Institutes of Health, Ministry of Health Malaysia | Anasir MI; Azizan MA; Kamel K; Mohd Zawawi Z; Ramly N; Robert F; Suppiah J; Thayan R                                                                                                                                                                                                                                                                                                                                                                                                                                                                                                                                                                                                           |
| EPI_ISL_1973324, EPI_ISL_2020075, EPI_ISL_2020077, EPI_ISL_2020078, EPI_ISL_2020165, EPI_ISL_2020166, EPI_ISL_2020167, EPI_ISL_3333236, EPI_ISL_3333581, EPI_ISL_3333593                                                                                                                                                                                                                                                                                                                                                                                                                                                                                                                                                                                                                                                                                                                                                                                                                                                                                                                                                                                                                                                                                                                   | see above                                                                                                                                                  | Kota Bharu Public Health Laboratory                                                                                            | Anasir MI; Azizan MA; Kamel K; Mohd Zawawi Z; Ramly N; Robert F; Suppiah J; Thayan R; uppiah J                                                                                                                                                                                                                                                                                                                                                                                                                                                                                                                                                                                                 |
| EPI_ISL_2988871, EPI_ISL_2988872, EPI_ISL_2988873, EPI_ISL_2988874                                                                                                                                                                                                                                                                                                                                                                                                                                                                                                                                                                                                                                                                                                                                                                                                                                                                                                                                                                                                                                                                                                                                                                                                                         | Kota Bharu Public Health Laboratory                                                                                                                        | Molecular Research Laboratory                                                                                                  | Abdul Haris bin Muhammad; Ahmad Sukari Bin Halim; Alexander Chong Shu Chien; Aswini Leela; Azian Harun; Chan Yean Yean; Chua Wei Chuan; Chua Wei Lian; Engku Nur Syafirah bt Engku Abd Rahman; Kamarul Imran Musa; Kimpal Kaur Banga Singh; Lau Nyok Sean; Lee Lih Huey; Lee Yeong Yeh; Lim Shu Yong; Maizun binti Mohd Zain; Muhammad Fazli bin Khalid; Muhammad Nashrul Farhan Samsudin; Muhammad Zarul Hanifah Bin Md Zogratt; Najib Majdi Bin Yaacob; Nazmi Liana Binti Azmi; Noor Hafizan binti Mat Salleh; Nurfadhlina Musa; Qasim Ayub; Rosline Hassan; Sadequr Rahman; Syahida binti Omar; Wan Mohd Zahiruddin Wan Mohammad; Wilhelm Eng Wei Han; Zaini bin Hussin; Zakuan Zainy Deris |
| EPI_ISL_4101547                                                                                                                                                                                                                                                                                                                                                                                                                                                                                                                                                                                                                                                                                                                                                                                                                                                                                                                                                                                                                                                                                                                                                                                                                                                                            | Kota Marudu District Health Office                                                                                                                         | Institute for Medical Research, Infectious Disease Research Centre, National Institutes of Health, Ministry of Health Malaysia | Ahmad FA; Ahmad Fazilah NA; Anasir MI; Azizan MA; Kamel K; Mohd Zawawi Z; Norhisham SN; Ramly N; Robert F; Suppiah J; Thayan R                                                                                                                                                                                                                                                                                                                                                                                                                                                                                                                                                                 |
| EPI_ISL_4096795                                                                                                                                                                                                                                                                                                                                                                                                                                                                                                                                                                                                                                                                                                                                                                                                                                                                                                                                                                                                                                                                                                                                                                                                                                                                            | Kuala Kubu Baru Hospital                                                                                                                                   | Institute for Medical Research, Infectious Disease Research Centre, National Institutes of Health, Ministry of Health Malaysia | Ahmad FA; Ahmad Fazilah NA; Anasir MI; Azizan MA; Kamel K; Mohd Zawawi Z; Norhisham SN; Ramly N; Robert F; Suppiah J; Thayan R                                                                                                                                                                                                                                                                                                                                                                                                                                                                                                                                                                 |
| EPI_ISL_3446657                                                                                                                                                                                                                                                                                                                                                                                                                                                                                                                                                                                                                                                                                                                                                                                                                                                                                                                                                                                                                                                                                                                                                                                                                                                                            | Kuala Kubu Bharu Hospital                                                                                                                                  | Institute for Medical Research, Infectious Disease Research Centre, National Institutes of Health, Ministry of Health Malaysia | Anasir MI; Azizan MA; Kamel K; Mohd Zawawi Z; Ramly N; Robert F; Suppiah J; Thayan R                                                                                                                                                                                                                                                                                                                                                                                                                                                                                                                                                                                                           |
| EPI_ISL_3446717, EPI_ISL_3446719, EPI_ISL_3446726, EPI_ISL_3446728                                                                                                                                                                                                                                                                                                                                                                                                                                                                                                                                                                                                                                                                                                                                                                                                                                                                                                                                                                                                                                                                                                                                                                                                                         | Kuala Langat District Health Office                                                                                                                        | Institute for Medical Research, Infectious Disease Research Centre, National Institutes of Health, Ministry of Health Malaysia | Anasir MI; Azizan MA; Kamel K; Mohd Zawawi Z; Ramly N; Robert F; Suppiah J; Thayan R                                                                                                                                                                                                                                                                                                                                                                                                                                                                                                                                                                                                           |
| EPI_ISL_2815331, EPI_ISL_4348275, EPI_ISL_4348276                                                                                                                                                                                                                                                                                                                                                                                                                                                                                                                                                                                                                                                                                                                                                                                                                                                                                                                                                                                                                                                                                                                                                                                                                                          | Kuala Lumpur General Hospital                                                                                                                              | Institute for Medical Research, Infectious Disease Research Centre, National Institutes of Health, Ministry of Health Malaysia | Ahmad FA; Ahmad Fazilah NA; Anasir MI; Azizan MA; Kamel K; Mohd Zawawi Z; Norhisham SN; Ramly N; Robert F; Suppiah J; Thayan R                                                                                                                                                                                                                                                                                                                                                                                                                                                                                                                                                                 |
| EPI_ISL_2649993, EPI_ISL_3071860, EPI_ISL_3101006                                                                                                                                                                                                                                                                                                                                                                                                                                                                                                                                                                                                                                                                                                                                                                                                                                                                                                                                                                                                                                                                                                                                                                                                                                          | Kuala Lumpur Hospital                                                                                                                                      | Institute for Medical Research, Infectious Disease Research Centre, National Institutes of Health, Ministry of Health Malaysia | Anasir MI; Azizan MA; Kamel K; Mohd Zawawi Z; Ramly N; Robert F; Suppiah J; Thayan R                                                                                                                                                                                                                                                                                                                                                                                                                                                                                                                                                                                                           |
| EPI_ISL_3425312, EPI_ISL_3425462, EPI_ISL_3764515, EPI_ISL_3765760                                                                                                                                                                                                                                                                                                                                                                                                                                                                                                                                                                                                                                                                                                                                                                                                                                                                                                                                                                                                                                                                                                                                                                                                                         | Kuala Lumpur International Airport (KLIA) Health Office                                                                                                    | Institute for Medical Research, Infectious Disease Research Centre, National Institutes of Health, Ministry of Health Malaysia | Anasir MI; Azizan MA; Kamel K; Mohd Zawawi Z; Ramly N; Robert F; Suppiah J; Thayan R                                                                                                                                                                                                                                                                                                                                                                                                                                                                                                                                                                                                           |
| EPI_ISL_2811865, EPI_ISL_2811866, EPI_ISL_2811867, EPI_ISL_2811868, EPI_ISL_2811869, EPI_ISL_2811870                                                                                                                                                                                                                                                                                                                                                                                                                                                                                                                                                                                                                                                                                                                                                                                                                                                                                                                                                                                                                                                                                                                                                                                       | Kuala Lumpur International Healthcare Centre (KLIHC)                                                                                                       | Institute for Medical Research, Infectious Disease Research Centre, National Institutes of Health, Ministry of Health Malaysia | Azizan MA; Kamel K; Mohd Zawawi Z; Ramly N; Robert F; Suppiah J; Thaya; Thayan R                                                                                                                                                                                                                                                                                                                                                                                                                                                                                                                                                                                                               |
| EPI_ISL_3071988                                                                                                                                                                                                                                                                                                                                                                                                                                                                                                                                                                                                                                                                                                                                                                                                                                                                                                                                                                                                                                                                                                                                                                                                                                                                            | Kuala Pilah District Health Office                                                                                                                         | Institute for Medical Research, Infectious Disease Research Centre, National Institutes of Health, Ministry of Health Malaysia | Anasir MI; Kamel K; Mohd Zawawi Z; Ramly N; Robert F; Suppiah J; Thayan R                                                                                                                                                                                                                                                                                                                                                                                                                                                                                                                                                                                                                      |
| EPI_ISL_3120236                                                                                                                                                                                                                                                                                                                                                                                                                                                                                                                                                                                                                                                                                                                                                                                                                                                                                                                                                                                                                                                                                                                                                                                                                                                                            | Kuala Pilah Health District Office                                                                                                                         | Institute for Medical Research, Infectious Disease Research Centre, National Institutes of Health, Ministry of Health Malaysia | Anasir MI; Azizan MA; Kamel K; Mohd Zawawi Z; Ramly N; Robert F; Suppiah J; Thayan R                                                                                                                                                                                                                                                                                                                                                                                                                                                                                                                                                                                                           |
| EPI_ISL_3446692, EPI_ISL_3446695                                                                                                                                                                                                                                                                                                                                                                                                                                                                                                                                                                                                                                                                                                                                                                                                                                                                                                                                                                                                                                                                                                                                                                                                                                                           | Kuala Selangor Health Clinic                                                                                                                               | Institute for Medical Research, Infectious Disease Research Centre, National Institutes of Health, Ministry of Health Malaysia | Anasir MI; Azizan MA; Kamel K; Mohd Zawawi Z; Ramly N; Robert F; Suppiah J; Thayan R                                                                                                                                                                                                                                                                                                                                                                                                                                                                                                                                                                                                           |
| EPI_ISL_2854187                                                                                                                                                                                                                                                                                                                                                                                                                                                                                                                                                                                                                                                                                                                                                                                                                                                                                                                                                                                                                                                                                                                                                                                                                                                                            | Kuala Terengganu District Health Office                                                                                                                    | Institute for Medical Research, Infectious Disease Research Centre, National Institutes of Health, Ministry of Health Malaysia | Anasir MI; Azizan MA; Kamel K; Mohd Zawawi Z; Ramly N; Robert F; Suppiah J; Thayan R                                                                                                                                                                                                                                                                                                                                                                                                                                                                                                                                                                                                           |
| EPI_ISL_3446658                                                                                                                                                                                                                                                                                                                                                                                                                                                                                                                                                                                                                                                                                                                                                                                                                                                                                                                                                                                                                                                                                                                                                                                                                                                                            | Kuala kubu Bharu Hospital                                                                                                                                  | Institute for Medical Research, Infectious Disease Research Centre, National Institutes of Health, Ministry of Health Malaysia | Anasir MI; Azizan MA; Kamel K; Mohd Zawawi Z; Ramly N; Robert F; Suppiah J; Thayan R                                                                                                                                                                                                                                                                                                                                                                                                                                                                                                                                                                                                           |
| EPI_ISL_4096812                                                                                                                                                                                                                                                                                                                                                                                                                                                                                                                                                                                                                                                                                                                                                                                                                                                                                                                                                                                                                                                                                                                                                                                                                                                                            | Kudat District Health Office                                                                                                                               | Institute for Medical Research, Infectious Disease Research Centre, National Institutes of Health, Ministry of Health Malaysia | Ahmad FA; Ahmad Fazilah NA; Anasir MI; Azizan MA; Kamel K; Mohd Zawawi Z; Norhisham SN; Ramly N; Robert F; Suppiah J; Thayan R                                                                                                                                                                                                                                                                                                                                                                                                                                                                                                                                                                 |
| EPI_ISL_2649991                                                                                                                                                                                                                                                                                                                                                                                                                                                                                                                                                                                                                                                                                                                                                                                                                                                                                                                                                                                                                                                                                                                                                                                                                                                                            | Kudat Hospital                                                                                                                                             | Institute for Medical Research, Infectious Disease Research Centre, National Institutes of Health, Ministry of Health Malaysia | Azizan MA; Kamel K; Mohd Zawawi Z; Ramly N; Robert F; Suppiah J; Thayan R                                                                                                                                                                                                                                                                                                                                                                                                                                                                                                                                                                                                                      |
| EPI_ISL_2621664                                                                                                                                                                                                                                                                                                                                                                                                                                                                                                                                                                                                                                                                                                                                                                                                                                                                                                                                                                                                                                                                                                                                                                                                                                                                            | Kulim Hospital                                                                                                                                             | Institute for Medical Research, Infectious Disease Research Centre, National Institutes of Health, Ministry of Health Malaysia | Azizan MA; Kamel K; Mohd Zawawi Z; Ramly N; Robert F; Suppiah J; Thayan R                                                                                                                                                                                                                                                                                                                                                                                                                                                                                                                                                                                                                      |
| EPI_ISL_3221324                                                                                                                                                                                                                                                                                                                                                                                                                                                                                                                                                                                                                                                                                                                                                                                                                                                                                                                                                                                                                                                                                                                                                                                                                                                                            | Kulliyah of Medicine, International Islamic University Malaysia, Bandar Indera Mahkota Campus, Jalan Sultan Ahmad Shah, 25200 Kuantan, Pahang Darul Makmur | Centre for Research in Advanced Tropical Bioscience (Biotropic Centre)                                                         | How Soon Hin and Hajar Fauzan Ahmad; Norhidayah Kamarudin; Ummu Afeera Zainulabid                                                                                                                                                                                                                                                                                                                                                                                                                                                                                                                                                                                                              |
| EPI_ISL_3334843, EPI_ISL_3355465                                                                                                                                                                                                                                                                                                                                                                                                                                                                                                                                                                                                                                                                                                                                                                                                                                                                                                                                                                                                                                                                                                                                                                                                                                                           | Lablink (M) Sdn. Bhd                                                                                                                                       | Institute for Medical Research, Infectious Disease Research Centre, National Institutes of Health, Ministry of Health Malaysia | Anasir MI; Azizan MA; Kamel K; Mohd Zawawi Z; Ramly N; Robert F; Suppiah J; Thayan R                                                                                                                                                                                                                                                                                                                                                                                                                                                                                                                                                                                                           |
| EPI_ISL_3355464, EPI_ISL_3374523, EPI_ISL_3374524                                                                                                                                                                                                                                                                                                                                                                                                                                                                                                                                                                                                                                                                                                                                                                                                                                                                                                                                                                                                                                                                                                                                                                                                                                          | Lablink (M) Sdn. Bhd.                                                                                                                                      | Institute for Medical Research, Infectious Disease Research Centre, National Institutes of Health, Ministry of Health Malaysia | Anasir MI; Azizan MA; Kamel K; Mohd Zawawi Z; Ramly N; Robert F; Suppiah J; Thayan R                                                                                                                                                                                                                                                                                                                                                                                                                                                                                                                                                                                                           |
| EPI_ISL_1585270, EPI_ISL_1585271, EPI_ISL_2549741, EPI_ISL_2757931, EPI_ISL_2812651, EPI_ISL_2812971, EPI_ISL_2854048, EPI_ISL_2921610, EPI_ISL_2921611, EPI_ISL_2924057, EPI_ISL_2931921                                                                                                                                                                                                                                                                                                                                                                                                                                                                                                                                                                                                                                                                                                                                                                                                                                                                                                                                                                                                                                                                                                  | see above                                                                                                                                                  | Labuan Hospital                                                                                                                | Anasir MI; Azizan MA; Kamel K; Mohd Zawawi Z; Ramly N; Robert F; Suppiah J; Thayan R                                                                                                                                                                                                                                                                                                                                                                                                                                                                                                                                                                                                           |
| EPI_ISL_3762823, EPI_ISL_3762824                                                                                                                                                                                                                                                                                                                                                                                                                                                                                                                                                                                                                                                                                                                                                                                                                                                                                                                                                                                                                                                                                                                                                                                                                                                           | Lahad Datu Area Health Office                                                                                                                              | Institute for Medical Research, Infectious Disease Research Centre, National Institutes of Health, Ministry of Health Malaysia | Anasir MI; Azizan MA; Kamel K; Mohd Zawawi Z; Ramly N; Robert F; Suppiah J; Thayan R                                                                                                                                                                                                                                                                                                                                                                                                                                                                                                                                                                                                           |
| EPI_ISL_2854068, EPI_ISL_4096793, EPI_ISL_4096794, EPI_ISL_4348240, EPI_ISL_4348270, EPI_ISL_4348271, EPI_ISL_4348272                                                                                                                                                                                                                                                                                                                                                                                                                                                                                                                                                                                                                                                                                                                                                                                                                                                                                                                                                                                                                                                                                                                                                                      | see above                                                                                                                                                  | Lahad Datu Hospital                                                                                                            | Ahmad FA; Ahmad Fazilah NA; Anasir MI; Azizan MA; Kamel K; Mohd Zawawi Z; Norhisham SN; Norhisham SN; Ramly N; Robert F; Suppiah J; Thayan R                                                                                                                                                                                                                                                                                                                                                                                                                                                                                                                                                   |
| EPI_ISL_3120112, EPI_ISL_3120113, EPI_ISL_4602781                                                                                                                                                                                                                                                                                                                                                                                                                                                                                                                                                                                                                                                                                                                                                                                                                                                                                                                                                                                                                                                                                                                                                                                                                                          | Lembah Pantai Health Office                                                                                                                                | Institute for Medical Research, Infectious Disease Research Centre, National Institutes of Health, Ministry of Health Malaysia | Ahmad FA; Ahmad Fazilah NA; Anasir MI; Azizan MA; Kamel K; Mohd Zawawi Z; Norhisham SN; Ramly N; Robert F; Suppiah J; Thayan R                                                                                                                                                                                                                                                                                                                                                                                                                                                                                                                                                                 |
| EPI_ISL_3266067                                                                                                                                                                                                                                                                                                                                                                                                                                                                                                                                                                                                                                                                                                                                                                                                                                                                                                                                                                                                                                                                                                                                                                                                                                                                            | Likas Hospital                                                                                                                                             | Institute for Medical Research, Infectious Disease Research Centre, National Institutes of Health, Ministry of Health Malaysia | Anasir MI; Azizan MA; Kamel K; Mohd Zawawi Z; Ramly N; Robert F; Suppiah J; Thayan R                                                                                                                                                                                                                                                                                                                                                                                                                                                                                                                                                                                                           |
| EPI_ISL_807151, EPI_ISL_807152, EPI_ISL_807153                                                                                                                                                                                                                                                                                                                                                                                                                                                                                                                                                                                                                                                                                                                                                                                                                                                                                                                                                                                                                                                                                                                                                                                                                                             | Makmal Kesihatan Awam Kebangsaan, Kementerian Kesihatan Malaysia                                                                                           | Integrative Pharmacogenomics Institute (iPROMISE)                                                                              | Ariza Adnan; Fadzilah Mohd Nor; Hani Mat Hussin; Lim Wai Feng; Mohd Nur Fakhruzzaman Noorizhab; Mohd Zaki Salleh; Nor Zahrin Hasran; Sazzli Shahlan Kassim; Siti Farah Alwani Mohd Nawi; Siti Hamimah Sheikh Abdul Kadir; Teh Lay Kek; Wang Seok Mui                                                                                                                                                                                                                                                                                                                                                                                                                                           |
| EPI_ISL_807150                                                                                                                                                                                                                                                                                                                                                                                                                                                                                                                                                                                                                                                                                                                                                                                                                                                                                                                                                                                                                                                                                                                                                                                                                                                                             | Makmal Kesihatan Awam Kebangsaan, Kementerian Kesihatan Malaysia.                                                                                          | Integrative Pharmacogenomics Institute (iPROMISE)                                                                              | Ariza Adnan; Fadzilah Mohd Nor; Hani Mat Hussin; Lim Wai Feng; Mohd Nur Fakhruzzaman Noorizhab; Mohd Zaki Salleh; Nor Zahrin Hasran; Sazzli Shahlan Kassim; Siti Farah Alwani Mohd Nawi; Siti Hamimah Sheikh Abdul Kadir; Teh Lay Kek; Wang Seok Mui                                                                                                                                                                                                                                                                                                                                                                                                                                           |
| EPI_ISL_936490                                                                                                                                                                                                                                                                                                                                                                                                                                                                                                                                                                                                                                                                                                                                                                                                                                                                                                                                                                                                                                                                                                                                                                                                                                                                             | Makmal Kesihatan Awam Kota Bharu                                                                                                                           | Institute for Medical Research, Infectious Disease Research Centre, National Institutes of Health, Ministry of Health Malaysia | Azizan MA; Kamel K; Suppiah J; Thayan R                                                                                                                                                                                                                                                                                                                                                                                                                                                                                                                                                                                                                                                        |
| EPI_ISL_528738, EPI_ISL_528739, EPI_ISL_528740, EPI_ISL_528741, EPI_ISL_528742, EPI_ISL_528743, EPI_ISL_528744, EPI_ISL_568873, EPI_ISL_568874, EPI_ISL_568875, EPI_ISL_582124, EPI_ISL_977591, EPI_ISL_977592, EPI_ISL_977593, EPI_ISL_1059900, EPI_ISL_1059901, EPI_ISL_1435802, EPI_ISL_1435804, EPI_ISL_1435806, EPI_ISL_1435808, EPI_ISL_1435810, EPI_ISL_1435812, EPI_ISL_1435814, EPI_ISL_1435816, EPI_ISL_1435817, EPI_ISL_1435820, EPI_ISL_2342585, EPI_ISL_2342586, EPI_ISL_2342587, EPI_ISL_2342588, EPI_ISL_2342589, EPI_ISL_2342590, EPI_ISL_2342591, EPI_ISL_2342592, EPI_ISL_2342593, EPI_ISL_2342594, EPI_ISL_2342595, EPI_ISL_2342596, EPI_ISL_2342597, EPI_ISL_2342598, EPI_ISL_2342599, EPI_ISL_2342600, EPI_ISL_3356250, EPI_ISL_3356251, EPI_ISL_3356252, EPI_ISL_3356253, EPI_ISL_3356254, EPI_ISL_3356255, EPI_ISL_3356256, EPI_ISL_3356257, EPI_ISL_3356258, EPI_ISL_3356259, EPI_ISL_3356260, EPI_ISL_3356261, EPI_ISL_3356262, EPI_ISL_3356263, EPI_ISL_3356264, EPI_ISL_3356265, EPI_ISL_3356266, EPI_ISL_3356267, EPI_ISL_3356268, EPI_ISL_3356269, EPI_ISL_3356270, EPI_ISL_3356271, EPI_ISL_3356272, EPI_ISL_3356273, EPI_ISL_3356274, EPI_ISL_3356275, EPI_ISL_3356276, EPI_ISL_3356277, EPI_ISL_3356278, EPI_ISL_3356279, EPI_ISL_3356280, EPI_ISL_3356281 | see above                                                                                                                                                  | Malaysia Genome Institute                                                                                                      | Azrin Ahmad; Enizza Kasim; Gan Han Ming; Irni Suhayyu Sapien; Mohd Faizal Abu Bakar; Mohd Noor Mat Isa; Nor Azfa Johari; Nor Azfa Johari.; Nurhezreen Md Iqbal; Shahrul Hisham Zainal Ariffin; Shamsidar Sopie; Siti Noraini Othman; Tan Ju Lin; Yusuf Muhammad Noor                                                                                                                                                                                                                                                                                                                                                                                                                           |
| EPI_ISL_2854188                                                                                                                                                                                                                                                                                                                                                                                                                                                                                                                                                                                                                                                                                                                                                                                                                                                                                                                                                                                                                                                                                                                                                                                                                                                                            | Marang District Health Office                                                                                                                              | Institute for Medical Research, Infectious Disease Research Centre, National Institutes of Health, Ministry of Health Malaysia | Anasir MI; Azizan MA; Kamel K; Mohd Zawawi Z; Ramly N; Robert F; Suppiah J; Thayan R                                                                                                                                                                                                                                                                                                                                                                                                                                                                                                                                                                                                           |



|                                                                                                                                                                                                                                                                                                                                                                                                                                                                                                                                                                                                                                                     |                                                         |                                                                                                                                |                                                                                                                                                                                                                                       |                                                                |
|-----------------------------------------------------------------------------------------------------------------------------------------------------------------------------------------------------------------------------------------------------------------------------------------------------------------------------------------------------------------------------------------------------------------------------------------------------------------------------------------------------------------------------------------------------------------------------------------------------------------------------------------------------|---------------------------------------------------------|--------------------------------------------------------------------------------------------------------------------------------|---------------------------------------------------------------------------------------------------------------------------------------------------------------------------------------------------------------------------------------|----------------------------------------------------------------|
| EPI_ISL_3945555, EPI_ISL_3945556, EPI_ISL_4101597, EPI_ISL_4236999, EPI_ISL_4237000, EPI_ISL_4237001, EPI_ISL_4237002, EPI_ISL_4463176, EPI_ISL_4463181, EPI_ISL_4513494, EPI_ISL_4513495                                                                                                                                                                                                                                                                                                                                                                                                                                                           | see above                                               | PKD TAMPIN                                                                                                                     | UKM Medical Molecular Biology Institute (UMBI)                                                                                                                                                                                        | Mira Farzana binti Mohamad Mokhtar; Nur Alyaa Affiah Md Shahri |
| EPI_ISL_3980731                                                                                                                                                                                                                                                                                                                                                                                                                                                                                                                                                                                                                                     | PKD Tanah Merah                                         | Tropical Infectious Diseases Research & Education Centre (TIDREC), Universiti Malaya                                           | AsmaAnati CheMatSer; Che-Norainon Yaacob; Jia-Yi Tan; Jo-Ern Wong; Kim-Kee Tan; Mulya-Mustika-Sari Zulkifli; Noor Syahida Azizan; Nur-Hidayana Mahfodz; Szazaly AbuBakar; Siti-Sarah Nor'e                                            |                                                                |
| EPI_ISL_2921263, EPI_ISL_2921264, EPI_ISL_2921265, EPI_ISL_2921266                                                                                                                                                                                                                                                                                                                                                                                                                                                                                                                                                                                  | Pahang State Health Department                          | Institute for Medical Research, Infectious Disease Research Centre, National Institutes of Health, Ministry of Health Malaysia | Anasir MI; Azizan MA; Kamel K; Mohd Zawawi Z; Ramly N; Robert F; Suppiah J; Thayan R                                                                                                                                                  |                                                                |
| EPI_ISL_3446696, EPI_ISL_3446697, EPI_ISL_3762835                                                                                                                                                                                                                                                                                                                                                                                                                                                                                                                                                                                                   | Pandamaran Health Clinic                                | Institute for Medical Research, Infectious Disease Research Centre, National Institutes of Health, Ministry of Health Malaysia | Anasir MI; Azizan MA; Kamel K; Mohd Zawawi Z; Ramly N; Robert F; Suppiah J; Thayan R                                                                                                                                                  |                                                                |
| EPI_ISL_2921262                                                                                                                                                                                                                                                                                                                                                                                                                                                                                                                                                                                                                                     | Pantai Hospital Kuala Lumpur                            | Institute for Medical Research, Infectious Disease Research Centre, National Institutes of Health, Ministry of Health Malaysia | Anasir MI; Azizan MA; Kamel K; Mohd Zawawi Z; Ramly N; Robert F; Suppiah J; Thayan R                                                                                                                                                  |                                                                |
| EPI_ISL_2811871, EPI_ISL_2811873                                                                                                                                                                                                                                                                                                                                                                                                                                                                                                                                                                                                                    | Pasir Mas Town Health Clinic                            | Institute for Medical Research, Infectious Disease Research Centre, National Institutes of Health, Ministry of Health Malaysia | Azizan MA; Kamel K; Mohd Zawawi Z; Ramly N; Robert F; Suppiah J; Thayan R                                                                                                                                                             |                                                                |
| EPI_ISL_3945550, EPI_ISL_3945551, EPI_ISL_3945552                                                                                                                                                                                                                                                                                                                                                                                                                                                                                                                                                                                                   | Pejabat Kesihatan Batu Pahat                            | UKM Medical Molecular Biology Institute (UMBI)                                                                                 | Nur Alyaa Affiah Md Shahri                                                                                                                                                                                                            |                                                                |
| EPI_ISL_4122468                                                                                                                                                                                                                                                                                                                                                                                                                                                                                                                                                                                                                                     | Pejabat Kesihatan Daerah Kangar                         | iPROMISE, UITM                                                                                                                 | Ariza Adnan; Fadzilah Mohd Nor; Lim Wai Feng; Mohd Asif Mohd Sukri; Mohd Nur Fakhruzzaman Noorizhab; Mohd Zaki Salleh; Sazzli Shahlan Kassim; Siti Farah Alwani Mohd Naw; Siti Hamimah Sheikh Abdul Kadir; Teh Lay Kek; Wang Seok Mui |                                                                |
| EPI_ISL_4557953, EPI_ISL_4558237, EPI_ISL_4558238                                                                                                                                                                                                                                                                                                                                                                                                                                                                                                                                                                                                   | Pejabat Kesihatan Daerah Kota Marudu                    | Malaysia Genome Institute                                                                                                      | Azrin Ahmad; Enizza Kasim; Irni Suhayu Sapian; Mohd Faizal Abu Bakar; Mohd Ghows Mohd Azzam.; Mohd Noor Mat Isa; Nor Azfa Johari; Nurhezreen Md Iqbal; Shamsidar Sopie; Siti Noraini Othman; Yusuf Muhammad Noor                      |                                                                |
| EPI_ISL_4557954                                                                                                                                                                                                                                                                                                                                                                                                                                                                                                                                                                                                                                     | Pejabat Kesihatan Daerah Sipitang                       | Malaysia Genome Institute                                                                                                      | Azrin Ahmad; Enizza Kasim; Irni Suhayu Sapian; Mohd Faizal Abu Bakar; Mohd Ghows Mohd Azzam.; Mohd Noor Mat Isa; Nor Azfa Johari; Nurhezreen Md Iqbal; Shamsidar Sopie; Siti Noraini Othman; Yusuf Muhammad Noor                      |                                                                |
| EPI_ISL_4557952, EPI_ISL_4601567, EPI_ISL_4601568, EPI_ISL_4601569                                                                                                                                                                                                                                                                                                                                                                                                                                                                                                                                                                                  | Pejabat Kesihatan Kawasan Tawau                         | Malaysia Genome Institute                                                                                                      | Azrin Ahmad; Enizza Kasim; Irni Suhayu Sapian; Mohd Faizal Abu Bakar; Mohd Ghows Mohd Azzam.; Mohd Noor Mat Isa; Nor Azfa Johari; Nurhezreen Md Iqbal; Shamsidar Sopie; Siti Noraini Othman; Yusuf Muhammad Noor                      |                                                                |
| EPI_ISL_3769345                                                                                                                                                                                                                                                                                                                                                                                                                                                                                                                                                                                                                                     | Pejabat Kesihatan Pintu Antarabangsa                    | iPROMISE, UITM                                                                                                                 | Ariza Adnan; Fadzilah Mohd Nor; Lim Wai Feng; Mohd Asif Mohd Sukri; Mohd Nur Fakhruzzaman Noorizhab; Mohd Zaki Salleh; Sazzli Shahlan Kassim; Siti Farah Alwani Mohd Naw; Siti Hamimah Sheikh Abdul Kadir; Teh Lay Kek; Wang Seok Mui |                                                                |
| EPI_ISL_3769339, EPI_ISL_3769344, EPI_ISL_3769350, EPI_ISL_3769351, EPI_ISL_3769352, EPI_ISL_3769353, EPI_ISL_4122437, EPI_ISL_4122547                                                                                                                                                                                                                                                                                                                                                                                                                                                                                                              | Pejabat Kesihatan Pintu Masuk Antarabangsa              | iPROMISE, UITM                                                                                                                 | Ariza Adnan; Fadzilah Mohd Nor; Lim Wai Feng; Mohd Asif Mohd Sukri; Mohd Nur Fakhruzzaman Noorizhab; Mohd Zaki Salleh; Sazzli Shahlan Kassim; Siti Farah Alwani Mohd Naw; Siti Hamimah Sheikh Abdul Kadir; Teh Lay Kek; Wang Seok Mui |                                                                |
| see above                                                                                                                                                                                                                                                                                                                                                                                                                                                                                                                                                                                                                                           | Pejabat Kesihatan Pintu Masuk Antarabangsa              | iPROMISE, UITM                                                                                                                 | Ariza Adnan; Fadzilah Mohd Nor; Lim Wai Feng; Mohd Asif Mohd Sukri; Mohd Nur Fakhruzzaman Noorizhab; Mohd Zaki Salleh; Sazzli Shahlan Kassim; Siti Farah Alwani Mohd Naw; Siti Hamimah Sheikh Abdul Kadir; Teh Lay Kek; Wang Seok Mui |                                                                |
| EPI_ISL_3769336, EPI_ISL_3769337, EPI_ISL_3769338, EPI_ISL_3769340, EPI_ISL_3769341, EPI_ISL_3769342, EPI_ISL_3769346, EPI_ISL_3769347, EPI_ISL_3769348, EPI_ISL_4122447                                                                                                                                                                                                                                                                                                                                                                                                                                                                            | Pejabat Kesihatan Pintu Masuk Antarabangsa Pulau Pinang | iPROMISE, UITM                                                                                                                 | Ariza Adnan; Fadzilah Mohd Nor; Lim Wai Feng; Mohd Asif Mohd Sukri; Mohd Nur Fakhruzzaman Noorizhab; Mohd Zaki Salleh; Sazzli Shahlan Kassim; Siti Farah Alwani Mohd Naw; Siti Hamimah Sheikh Abdul Kadir; Teh Lay Kek; Wang Seok Mui |                                                                |
| see above                                                                                                                                                                                                                                                                                                                                                                                                                                                                                                                                                                                                                                           | Pejabat Kesihatan Pintu Masuk Antarabangsa Pulau Pinang | iPROMISE, UITM                                                                                                                 | Ariza Adnan; Fadzilah Mohd Nor; Lim Wai Feng; Mohd Asif Mohd Sukri; Mohd Nur Fakhruzzaman Noorizhab; Mohd Zaki Salleh; Sazzli Shahlan Kassim; Siti Farah Alwani Mohd Naw; Siti Hamimah Sheikh Abdul Kadir; Teh Lay Kek; Wang Seok Mui |                                                                |
| EPI_ISL_4565048                                                                                                                                                                                                                                                                                                                                                                                                                                                                                                                                                                                                                                     | Pejabat Kesihatan daerah Jeli                           | Tropical Infectious Diseases Research & Education Centre (TIDREC), Universiti Malaya                                           | AsmaAnati CheMatSer; Che-Norainon Yaacob; Jia-Yi Tan; Jo-Ern Wong; Kim-Kee Tan; Mulya-Mustika-Sari Zulkifli; Noor Syahida Azizan; Nur-Hidayana Mahfodz; Szazaly AbuBakar; Siti-Sarah Nor'e                                            |                                                                |
| EPI_ISL_2811984                                                                                                                                                                                                                                                                                                                                                                                                                                                                                                                                                                                                                                     | Pekan Tajau Health Clinic                               | Institute for Medical Research, Infectious Disease Research Centre, National Institutes of Health, Ministry of Health Malaysia | Azizan MA; Kamel K; Mohd Zawawi Z; Ramly N; Robert F; Suppiah J; Thayan R                                                                                                                                                             |                                                                |
| EPI_ISL_2649998, EPI_ISL_2649999, EPI_ISL_3723541, EPI_ISL_3723543, EPI_ISL_3723544, EPI_ISL_3723545, EPI_ISL_3762825, EPI_ISL_3762826, EPI_ISL_3762827, EPI_ISL_4348327                                                                                                                                                                                                                                                                                                                                                                                                                                                                            | Penang General Hospital                                 | Institute for Medical Research, Infectious Disease Research Centre, National Institutes of Health, Ministry of Health Malaysia | Ahmad FA; Ahmad Fazilah NA; Anasir MI; Azizan MA; Kamel K; Mohd Zawawi Z; Norhisyam SN; Ramly N; Robert F; Suppiah J; Thayan R                                                                                                        |                                                                |
| see above                                                                                                                                                                                                                                                                                                                                                                                                                                                                                                                                                                                                                                           | Penang General Hospital                                 | Institute for Medical Research, Infectious Disease Research Centre, National Institutes of Health, Ministry of Health Malaysia | Ahmad FA; Ahmad Fazilah NA; Anasir MI; Azizan MA; Kamel K; Mohd Zawawi Z; Norhisyam SN; Ramly N; Robert F; Suppiah J; Thayan R                                                                                                        |                                                                |
| EPI_ISL_3762773, EPI_ISL_3762789, EPI_ISL_3762790, EPI_ISL_3762818                                                                                                                                                                                                                                                                                                                                                                                                                                                                                                                                                                                  | Penang State Health Department                          | Institute for Medical Research, Infectious Disease Research Centre, National Institutes of Health, Ministry of Health Malaysia | Anasir MI; Azizan MA; Kamel K; Mohd Zawawi Z; Ramly N; Robert F; Suppiah J; Thayan R                                                                                                                                                  |                                                                |
| EPI_ISL_3247358, EPI_ISL_3247403                                                                                                                                                                                                                                                                                                                                                                                                                                                                                                                                                                                                                    | Perak State Health Department                           | Institute for Medical Research, Infectious Disease Research Centre, National Institutes of Health, Ministry of Health Malaysia | Anasir MI; Azizan MA; Kamel K; Mohd Zawawi Z; Ramly N; Robert F; Suppiah J; Thayan R                                                                                                                                                  |                                                                |
| EPI_ISL_3769364                                                                                                                                                                                                                                                                                                                                                                                                                                                                                                                                                                                                                                     | Pkd pekan                                               | iPROMISE, UITM                                                                                                                 | Ariza Adnan; Fadzilah Mohd Nor; Lim Wai Feng; Mohd Asif Mohd Sukri; Mohd Nur Fakhruzzaman Noorizhab; Mohd Zaki Salleh; Sazzli Shahlan Kassim; Siti Farah Alwani Mohd Naw; Siti Hamimah Sheikh Abdul Kadir; Teh Lay Kek; Wang Seok Mui |                                                                |
| EPI_ISL_3762828, EPI_ISL_3762829                                                                                                                                                                                                                                                                                                                                                                                                                                                                                                                                                                                                                    | Port Dickson District Health Office                     | Institute for Medical Research, Infectious Disease Research Centre, National Institutes of Health, Ministry of Health Malaysia | Anasir MI; Azizan MA; Kamel K; Mohd Zawawi Z; Ramly N; Robert F; Suppiah J; Thayan R                                                                                                                                                  |                                                                |
| EPI_ISL_2550758, EPI_ISL_2550759                                                                                                                                                                                                                                                                                                                                                                                                                                                                                                                                                                                                                    | Port Dickson Hospital                                   | Institute for Medical Research, Infectious Disease Research Centre, National Institutes of Health, Ministry of Health Malaysia | Azizan MA; Kamel K; Mohd Zawawi Z; Ramly N; Robert F; Suppiah J; Thayan R                                                                                                                                                             |                                                                |
| EPI_ISL_3446656                                                                                                                                                                                                                                                                                                                                                                                                                                                                                                                                                                                                                                     | Port Klang Health Clinic                                | Institute for Medical Research, Infectious Disease Research Centre, National Institutes of Health, Ministry of Health Malaysia | Anasir MI; Azizan MA; Kamel K; Mohd Zawawi Z; Ramly N; Robert F; Suppiah J; Thayan R                                                                                                                                                  |                                                                |
| EPI_ISL_3446702                                                                                                                                                                                                                                                                                                                                                                                                                                                                                                                                                                                                                                     | Pulau Ketam Health Clinic                               | Institute for Medical Research, Infectious Disease Research Centre, National Institutes of Health, Ministry of Health Malaysia | Anasir MI; Azizan MA; Kamel K; Mohd Zawawi Z; Ramly N; Robert F; Suppiah J; Thayan R                                                                                                                                                  |                                                                |
| EPI_ISL_3374154, EPI_ISL_3374706, EPI_ISL_3374707, EPI_ISL_3374708, EPI_ISL_4638334                                                                                                                                                                                                                                                                                                                                                                                                                                                                                                                                                                 | Putrajaya Health Office                                 | Institute for Medical Research, Infectious Disease Research Centre, National Institutes of Health, Ministry of Health Malaysia | Ahmad FA; Ahmad Fazilah NA; Anasir MI; Azizan MA; Kamel K; Mohd Zawawi Z; Norhisyam SN; Ramly N; Robert F; Suppiah J; Thayan R                                                                                                        |                                                                |
| EPI_ISL_4348302                                                                                                                                                                                                                                                                                                                                                                                                                                                                                                                                                                                                                                     | Putrajaya Hospital                                      | Institute for Medical Research, Infectious Disease Research Centre, National Institutes of Health, Ministry of Health Malaysia | Ahmad FA; Ahmad Fazilah NA; Anasir MI; Azizan MA; Kamel K; Mohd Zawawi Z; Norhisyam SN; Ramly N; Robert F; Suppiah J; Thayan R                                                                                                        |                                                                |
| EPI_ISL_2650027, EPI_ISL_2650430, EPI_ISL_2650432, EPI_ISL_2650499, EPI_ISL_2650505, EPI_ISL_2854106, EPI_ISL_3762495, EPI_ISL_4346231                                                                                                                                                                                                                                                                                                                                                                                                                                                                                                              | Queen Elizabeth Hospital                                | Institute for Medical Research, Infectious Disease Research Centre, National Institutes of Health, Ministry of Health Malaysia | Ahmad FA; Ahmad Fazilah NA; Anasir MI; Azizan MA; Kamel K; Mohd Zawawi Z; Norhisyam SN; Ramly N; Robert F; Suppiah J; Thayan R                                                                                                        |                                                                |
| see above                                                                                                                                                                                                                                                                                                                                                                                                                                                                                                                                                                                                                                           | Queen Elizabeth Hospital                                | Institute for Medical Research, Infectious Disease Research Centre, National Institutes of Health, Ministry of Health Malaysia | Ahmad FA; Ahmad Fazilah NA; Anasir MI; Azizan MA; Kamel K; Mohd Zawawi Z; Norhisyam SN; Ramly N; Robert F; Suppiah J; Thayan R                                                                                                        |                                                                |
| EPI_ISL_2757941, EPI_ISL_2757942, EPI_ISL_2931924, EPI_ISL_3374470                                                                                                                                                                                                                                                                                                                                                                                                                                                                                                                                                                                  | Queen Elizabeth Hospital, Kota Kinabalu                 | Institute for Medical Research, Infectious Disease Research Centre, National Institutes of Health, Ministry of Health Malaysia | Anasir MI; Azizan MA; Kamel K; Mohd Zawawi Z; Ramly N; Robert F; Suppiah J; Thayan R                                                                                                                                                  |                                                                |
| EPI_ISL_3120110                                                                                                                                                                                                                                                                                                                                                                                                                                                                                                                                                                                                                                     | Raja Perempuan Zainab II Hospital                       | Institute for Medical Research, Infectious Disease Research Centre, National Institutes of Health, Ministry of Health Malaysia | Anasir MI; Azizan MA; Kamel K; Mohd Zawawi Z; Ramly N; Robert F; Suppiah J; Thayan R                                                                                                                                                  |                                                                |
| EPI_ISL_2811886                                                                                                                                                                                                                                                                                                                                                                                                                                                                                                                                                                                                                                     | Raja Perempuan Zainab II Hospital, Kota Bharu           | Institute for Medical Research, Infectious Disease Research Centre, National Institutes of Health, Ministry of Health Malaysia | Azizan MA; Kamel K; Mohd Zawawi Z; Ramly N; Robert F; Suppiah J; Thayan R                                                                                                                                                             |                                                                |
| EPI_ISL_3762496, EPI_ISL_3762830                                                                                                                                                                                                                                                                                                                                                                                                                                                                                                                                                                                                                    | Raja Permaisuri Bainun Hospital                         | Institute for Medical Research, Infectious Disease Research Centre, National Institutes of Health, Ministry of Health Malaysia | Anasir MI; Azizan MA; Kamel K; Mohd Zawawi Z; Ramly N; Robert F; Suppiah J; Thayan R                                                                                                                                                  |                                                                |
| EPI_ISL_2812026, EPI_ISL_2812027, EPI_ISL_2812028                                                                                                                                                                                                                                                                                                                                                                                                                                                                                                                                                                                                   | Rembau Health Clinic                                    | Institute for Medical Research, Infectious Disease Research Centre, National Institutes of Health, Ministry of Health Malaysia | Azizan MA; Kamel K; Mohd Zawawi Z; Ramly N; Robert F; Suppiah J; Thayan R                                                                                                                                                             |                                                                |
| EPI_ISL_4236988                                                                                                                                                                                                                                                                                                                                                                                                                                                                                                                                                                                                                                     | SWAT TEAM, HPSF                                         | UKM Medical Molecular Biology Institute (UMBI)                                                                                 | Mira Farzana binti Mohamad Mokhtar                                                                                                                                                                                                    |                                                                |
| EPI_ISL_4347923, EPI_ISL_4347983, EPI_ISL_4348047                                                                                                                                                                                                                                                                                                                                                                                                                                                                                                                                                                                                   | Sabah State Health Department                           | Institute for Medical Research, Infectious Disease Research Centre, National Institutes of Health, Ministry of Health Malaysia | Ahmad FA; Ahmad Fazilah NA; Anasir MI; Azizan MA; Kamel K; Mohd Zawawi Z; Norhisyam SN; Ramly N; Robert F; Suppiah J; Thayan R                                                                                                        |                                                                |
| EPI_ISL_4638327                                                                                                                                                                                                                                                                                                                                                                                                                                                                                                                                                                                                                                     | Salak Health Clinic                                     | Institute for Medical Research, Infectious Disease Research Centre, National Institutes of Health, Ministry of Health Malaysia | Ahmad FA; Ahmad Fazilah NA; Anasir MI; Azizan MA; Kamel K; Mohd Zawawi Z; Norhisyam SN; Ramly N; Robert F; Suppiah J; Thayan R                                                                                                        |                                                                |
| EPI_ISL_936495, EPI_ISL_2614745                                                                                                                                                                                                                                                                                                                                                                                                                                                                                                                                                                                                                     | Sarawak General Hospital                                | Institute for Medical Research, Infectious Disease Research Centre, National Institutes of Health, Ministry of Health Malaysia | Azizan MA; Kamel K; Mohd Zawawi Z; Ramly N; Robert F; Suppiah J; Thayan R                                                                                                                                                             |                                                                |
| EPI_ISL_4051662, EPI_ISL_4051663, EPI_ISL_4051677, EPI_ISL_4051730, EPI_ISL_4051731, EPI_ISL_4051732, EPI_ISL_4051733, EPI_ISL_4051734, EPI_ISL_4051735, EPI_ISL_4051736, EPI_ISL_4051739, EPI_ISL_4051740, EPI_ISL_4051741, EPI_ISL_4051742, EPI_ISL_4051743, EPI_ISL_4051744, EPI_ISL_4051745, EPI_ISL_4051746, EPI_ISL_4051747, EPI_ISL_4051749, EPI_ISL_4051750, EPI_ISL_4051751, EPI_ISL_4051752, EPI_ISL_4051753, EPI_ISL_4051754, EPI_ISL_4051755, EPI_ISL_4051756, EPI_ISL_4051757, EPI_ISL_4051758, EPI_ISL_4051759, EPI_ISL_4051760, EPI_ISL_4051761, EPI_ISL_4051762, EPI_ISL_4051763, EPI_ISL_4051830, EPI_ISL_4051842, EPI_ISL_4051849 | Institute of Health and Community Medicine              | Chan Chia Jui; Chua Hock Hin; David Perera; Ooi Mong How; Tonnni Sia Loong Loong; Wong Jyn Shan; Wong Kling Aik                |                                                                                                                                                                                                                                       |                                                                |
| see above                                                                                                                                                                                                                                                                                                                                                                                                                                                                                                                                                                                                                                           | Sarawak Heart Centre (SHC)                              | Institute of Health and Community Medicine                                                                                     | Chan Chia Jui; Chua Hock Hin; David Perera; Ooi Mong How; Tonnni Sia Loong Loong; Wong Jyn Shan                                                                                                                                       |                                                                |
| EPI_ISL_4460388, EPI_ISL_4460389, EPI_ISL_4460390, EPI_ISL_4460391, EPI_ISL_4460392                                                                                                                                                                                                                                                                                                                                                                                                                                                                                                                                                                 | Sarawak Heart Centre (SHC), Kota Samarahan              | Institute of Health and Community Medicine                                                                                     |                                                                                                                                                                                                                                       |                                                                |
| EPI_ISL_3762831, EPI_ISL_3762832                                                                                                                                                                                                                                                                                                                                                                                                                                                                                                                                                                                                                    | Seberang Perai Tengah District Health Office            | Institute for Medical Research, Infectious Disease Research Centre, National Institutes of Health, Ministry of Health Malaysia | Anasir MI; Azizan MA; Kamel K; Mohd Zawawi Z; Ramly N; Robert F; Suppiah J; Thayan R                                                                                                                                                  |                                                                |
| EPI_ISL_2649995                                                                                                                                                                                                                                                                                                                                                                                                                                                                                                                                                                                                                                     | Segamat Hospital                                        | Institute for Medical Research, Infectious Disease Research Centre, National Institutes of Health, Ministry of Health Malaysia | Azizan MA; Kamel K; Mohd Zawawi Z; Ramly N; Robert F; Suppiah J; Thayan R                                                                                                                                                             |                                                                |
| EPI_ISL_3071859, EPI_ISL_3120111, EPI_ISL_4096802, EPI_ISL_4348303                                                                                                                                                                                                                                                                                                                                                                                                                                                                                                                                                                                  | Selayang Hospital                                       | Institute for Medical Research, Infectious Disease Research Centre, National Institutes of Health, Ministry of Health Malaysia | Ahmad FA; Ahmad Fazilah NA; Anasir MI; Azizan MA; Kamel K; Mohd Zawawi Z; Norhisham SN; Norhisyam SN; Ramly N; Robert F; Suppiah J; Thayan R                                                                                          |                                                                |
| EPI_ISL_2815376, EPI_ISL_3333235, EPI_ISL_3356282, EPI_ISL_3356283, EPI_ISL_3356352, EPI_ISL_4101567, EPI_ISL_4348277, EPI_ISL_4348304                                                                                                                                                                                                                                                                                                                                                                                                                                                                                                              | Serdang Hospital                                        | Institute for Medical Research, Infectious Disease Research Centre, National Institutes of Health, Ministry of Health Malaysia | Ahmad FA; Ahmad Fazilah NA; Anasir MI; Azizan MA; Kamel K; Mohd Zawawi Z; Norhisham SN; Norhisyam SN; Ramly N; Robert F; Suppiah J; Thayan R                                                                                          |                                                                |
| see above                                                                                                                                                                                                                                                                                                                                                                                                                                                                                                                                                                                                                                           | Serdang Hospital                                        | Institute for Medical Research, Infectious Disease Research Centre, National Institutes of Health, Ministry of Health Malaysia | Ahmad FA; Ahmad Fazilah NA; Anasir MI; Azizan MA; Kamel K; Mohd Zawawi Z; Norhisham SN; Norhisyam SN; Ramly N; Robert F; Suppiah J; Thayan R                                                                                          |                                                                |
| EPI_ISL_3050258, EPI_ISL_3278292                                                                                                                                                                                                                                                                                                                                                                                                                                                                                                                                                                                                                    | Shah Alam Hospital                                      | Institute for Medical Research, Infectious Disease Research Centre, National Institutes of Health, Ministry of Health Malaysia | Anasir MI; Azizan MA; Kamel K; Mohd Zawawi Z; Ramly N; Robert F; Suppiah J; Thayan R                                                                                                                                                  |                                                                |

|                                                                                                                                                                                                                                                                                                                                                                                      |                                                                                                                |                                                                                                                                |                                                                                                                                                                                                                                                                             |
|--------------------------------------------------------------------------------------------------------------------------------------------------------------------------------------------------------------------------------------------------------------------------------------------------------------------------------------------------------------------------------------|----------------------------------------------------------------------------------------------------------------|--------------------------------------------------------------------------------------------------------------------------------|-----------------------------------------------------------------------------------------------------------------------------------------------------------------------------------------------------------------------------------------------------------------------------|
| EPI_ISL_3723540                                                                                                                                                                                                                                                                                                                                                                      | Sibu Hospital                                                                                                  | Institute for Medical Research, Infectious Disease Research Centre, National Institutes of Health, Ministry of Health Malaysia | Anasir MI; Azizan MA; Kamel K; Mohd Zawawi Z; Ramly N; Robert F; Suppiah J; Thayan R                                                                                                                                                                                        |
| EPI_ISL_3446703                                                                                                                                                                                                                                                                                                                                                                      | Sijangkang Health Clinic                                                                                       | Institute for Medical Research, Infectious Disease Research Centre, National Institutes of Health, Ministry of Health Malaysia | Anasir MI; Azizan MA; Kamel K; Mohd Zawawi Z; Ramly N; Robert F; Suppiah J; Thayan R                                                                                                                                                                                        |
| EPI_ISL_4101551, EPI_ISL_4101552, EPI_ISL_4101554, EPI_ISL_4101556, EPI_ISL_4101557, EPI_ISL_4101559                                                                                                                                                                                                                                                                                 | Sipitang District Health Office                                                                                | Institute for Medical Research, Infectious Disease Research Centre, National Institutes of Health, Ministry of Health Malaysia | Ahmad FA; Ahmad Fazilah NA; Anasir MI; Azizan MA; Kamel K; Mohd Zawawi Z; Norhisham SN; Ramly N; Robert F; Suppiah J; Thayan R                                                                                                                                              |
| EPI_ISL_3333563                                                                                                                                                                                                                                                                                                                                                                      | Slim River Hospital                                                                                            | Institute for Medical Research, Infectious Disease Research Centre, National Institutes of Health, Ministry of Health Malaysia | Anasir MI; Azizan MA; Kamel K; Mohd Zawawi Z; Ramly N; Robert F; Suppiah J; Thayan R                                                                                                                                                                                        |
| EPI_ISL_3120116                                                                                                                                                                                                                                                                                                                                                                      | Sultan Abdul Halim Hospital                                                                                    | Institute for Medical Research, Infectious Disease Research Centre, National Institutes of Health, Ministry of Health Malaysia | Anasir MI; Azizan MA; Kamel K; Mohd Zawawi Z; Ramly N; Robert F; Suppiah J; Thayan R                                                                                                                                                                                        |
| EPI_ISL_2828708                                                                                                                                                                                                                                                                                                                                                                      | Sultan Ahmad Shah Medical Centre @IIUM(SASMEC@IIUM)                                                            | Centre for Research in Advanced Tropical Bioscience (Biotropic Centre)                                                         | Hajar Fauzan Bin Ahmad                                                                                                                                                                                                                                                      |
| EPI_ISL_2812706, EPI_ISL_2921612, EPI_ISL_2924137, EPI_ISL_2924139                                                                                                                                                                                                                                                                                                                   | Sultan Haji Ahmad Shah Hospital                                                                                | Institute for Medical Research, Infectious Disease Research Centre, National Institutes of Health, Ministry of Health Malaysia | Anasir MI; Azizan MA; Kamel K; Mohd Zawawi Z; Ramly N; Robert F; Suppiah J; Thayan R                                                                                                                                                                                        |
| EPI_ISL_2649997, EPI_ISL_2854107, EPI_ISL_3762737                                                                                                                                                                                                                                                                                                                                    | Sultan Ismail Hospital                                                                                         | Institute for Medical Research, Infectious Disease Research Centre, National Institutes of Health, Ministry of Health Malaysia | Anasir MI; Azizan MA; Kamel K; Mohd Zawawi Z; Ramly N; Robert F; Suppiah J; Thayan R                                                                                                                                                                                        |
| EPI_ISL_2650028                                                                                                                                                                                                                                                                                                                                                                      | Sultanah Aminah Hospital                                                                                       | Institute for Medical Research, Infectious Disease Research Centre, National Institutes of Health, Ministry of Health Malaysia | Azizan MA; Kamel K; Mohd Zawawi Z; Ramly N; Robert F; Suppiah J; Thayan R                                                                                                                                                                                                   |
| EPI_ISL_2091024, EPI_ISL_2625637                                                                                                                                                                                                                                                                                                                                                     | Sultanah Aminah Hospital, Johor Bahru                                                                          | Institute for Medical Research, Infectious Disease Research Centre, National Institutes of Health, Ministry of Health Malaysia | Azizan MA; Kamel K; Mohd Zawawi Z; Ramly N; Robert F; Suppiah J; Thayan R                                                                                                                                                                                                   |
| EPI_ISL_2650014, EPI_ISL_2650015, EPI_ISL_3278301, EPI_ISL_3278302, EPI_ISL_4348321, EPI_ISL_4348322, EPI_ISL_4348323, EPI_ISL_4348325                                                                                                                                                                                                                                               | Sultanah Bahiyah Hospital                                                                                      | Institute for Medical Research, Infectious Disease Research Centre, National Institutes of Health, Ministry of Health Malaysia | Ahmad FA; Ahmad Fazilah NA; Anasir MI; Azizan MA; Kamel K; Mohd Zawawi Z; Norhishyam SN; Ramly N; Robert F; Suppiah J; Thayan R                                                                                                                                             |
| EPI_ISL_1972365, EPI_ISL_1972366, EPI_ISL_1972533, EPI_ISL_2614739, EPI_ISL_2683247, EPI_ISL_2683496, EPI_ISL_2684236, EPI_ISL_2811885, EPI_ISL_2812654, EPI_ISL_2812704, EPI_ISL_2815656, EPI_ISL_2815971, EPI_ISL_3100982, EPI_ISL_3120143, EPI_ISL_3120314, EPI_ISL_3333237, EPI_ISL_3333656, EPI_ISL_3333657, EPI_ISL_3333929, EPI_ISL_3333930, EPI_ISL_3333931, EPI_ISL_3374484 | Sultanah Bahiyah Hospital, Alor Setar                                                                          | Institute for Medical Research, Infectious Disease Research Centre, National Institutes of Health, Ministry of Health Malaysia | Anasir MI; Azizan MA; Kamel K; Mohd Zawawi Z; Ramly N; Robert F; Suppiah J; Thayan R                                                                                                                                                                                        |
| EPI_ISL_2931920, EPI_ISL_2931923                                                                                                                                                                                                                                                                                                                                                     | Sultanah Fatimah Specialist Hospital, Muar                                                                     | Institute for Medical Research, Infectious Disease Research Centre, National Institutes of Health, Ministry of Health Malaysia | Anasir MI; Azizan MA; Kamel K; Mohd Zawawi Z; Ramly N; Robert F; Suppiah J; Thayan R                                                                                                                                                                                        |
| EPI_ISL_2811878, EPI_ISL_2811879, EPI_ISL_2811880, EPI_ISL_2811881, EPI_ISL_2811882, EPI_ISL_2811883                                                                                                                                                                                                                                                                                 | Sultanah Nora Ismail Hospital, Batu Pahat                                                                      | Institute for Medical Research, Infectious Disease Research Centre, National Institutes of Health, Ministry of Health Malaysia | Azizan MA; Kamel K; Mohd Zawawi Z; Ramly N; Robert F; Suppiah J; Thayan R                                                                                                                                                                                                   |
| EPI_ISL_2650000, EPI_ISL_3278291                                                                                                                                                                                                                                                                                                                                                     | Sultanah Nur Zahirah Hospital                                                                                  | Institute for Medical Research, Infectious Disease Research Centre, National Institutes of Health, Ministry of Health Malaysia | Anasir MI; Azizan MA; Kamel K; Mohd Zawawi Z; Ramly N; Robert F; Suppiah J; Thayan R                                                                                                                                                                                        |
| EPI_ISL_1972356, EPI_ISL_2091020, EPI_ISL_2614743, EPI_ISL_2625623, EPI_ISL_2650004, EPI_ISL_2650005, EPI_ISL_2650010, EPI_ISL_2683956, EPI_ISL_3120237, EPI_ISL_3425706, EPI_ISL_3425707, EPI_ISL_3425789, EPI_ISL_4096796, EPI_ISL_4096797, EPI_ISL_4096798, EPI_ISL_4096799, EPI_ISL_4348278, EPI_ISL_4348279, EPI_ISL_4348301                                                    | Sungai Buloh Hospital                                                                                          | Institute for Medical Research, Infectious Disease Research Centre, National Institutes of Health, Ministry of Health Malaysia | Ahmad FA; Ahmad Fazilah NA; Anasir MI; Azizan MA; Kamel K; Mohd Zawawi Z; Norhisham SN; Norhishyam SN; Ramly N; Robert F; Suppiah J; Thayan R                                                                                                                               |
| EPI_ISL_3762819                                                                                                                                                                                                                                                                                                                                                                      | Tampin District Health                                                                                         | Institute for Medical Research, Infectious Disease Research Centre, National Institutes of Health, Ministry of Health Malaysia | Anasir MI; Azizan MA; Kamel K; Mohd Zawawi Z; Ramly N; Robert F; Suppiah J; Thayan R                                                                                                                                                                                        |
| EPI_ISL_3762738, EPI_ISL_3762758, EPI_ISL_3762820, EPI_ISL_3762821                                                                                                                                                                                                                                                                                                                   | Tampin District Health Office                                                                                  | Institute for Medical Research, Infectious Disease Research Centre, National Institutes of Health, Ministry of Health Malaysia | Anasir MI; Azizan MA; Kamel K; Mohd Zawawi Z; Ramly N; Robert F; Suppiah J; Thayan R                                                                                                                                                                                        |
| EPI_ISL_1972538, EPI_ISL_1972539, EPI_ISL_1972540, EPI_ISL_1972547                                                                                                                                                                                                                                                                                                                   | Tampin Hospital                                                                                                | Institute for Medical Research, Infectious Disease Research Centre, National Institutes of Health, Ministry of Health Malaysia | Azizan MA; Kamel K; Mohd Zawawi Z; Ramly N; Robert F; Suppiah J; Thayan R                                                                                                                                                                                                   |
| EPI_ISL_3446704, EPI_ISL_3446706                                                                                                                                                                                                                                                                                                                                                     | Tanjung Sepat Health Clinic                                                                                    | Institute for Medical Research, Infectious Disease Research Centre, National Institutes of Health, Ministry of Health Malaysia | Anasir MI; Azizan MA; Kamel K; Mohd Zawawi Z; Ramly N; Robert F; Suppiah J; Thayan R                                                                                                                                                                                        |
| EPI_ISL_3762833, EPI_ISL_3762834, EPI_ISL_3762836, EPI_ISL_4346360, EPI_ISL_4346611, EPI_ISL_4347144, EPI_ISL_4348149                                                                                                                                                                                                                                                                | Tawau Area Health Office                                                                                       | Institute for Medical Research, Infectious Disease Research Centre, National Institutes of Health, Ministry of Health Malaysia | Ahmad FA; Ahmad Fazilah NA; Anasir MI; Azizan MA; Kamel K; Mohd Zawawi Z; Norhishyam SN; Ramly N; Robert F; Suppiah J; Thayan R                                                                                                                                             |
| EPI_ISL_1919862, EPI_ISL_1919863, EPI_ISL_2379749, EPI_ISL_2650506, EPI_ISL_2854070, EPI_ISL_2854103, EPI_ISL_2854104, EPI_ISL_2854105, EPI_ISL_2854108, EPI_ISL_2854109, EPI_ISL_2854174, EPI_ISL_2854186, EPI_ISL_4348273, EPI_ISL_4348274                                                                                                                                         | Tawau Hospital                                                                                                 | Institute for Medical Research, Infectious Disease Research Centre, National Institutes of Health, Ministry of Health Malaysia | 40170 Selangor; Ahmad FA; Ahmad Fazilah NA; Anasir MI; Azizan MA; Bandar Setia Alam; Jalan Setia Murni U13/52; Kamel K; Malaysia; Mohd Zawawi Z; Norhishyam SN; Ramly N; Robert F; Suppiah J; Thayan R                                                                      |
| EPI_ISL_3446716                                                                                                                                                                                                                                                                                                                                                                      | Telok Panglima Garang Health Clinic                                                                            | Institute for Medical Research, Infectious Disease Research Centre, National Institutes of Health, Ministry of Health Malaysia | Anasir MI; Azizan MA; Kamel K; Mohd Zawawi Z; Ramly N; Robert F; Suppiah J; Thayan R                                                                                                                                                                                        |
| EPI_ISL_3446709, EPI_ISL_3446712                                                                                                                                                                                                                                                                                                                                                     | Teluk Datok Health Clinic                                                                                      | Institute for Medical Research, Infectious Disease Research Centre, National Institutes of Health, Ministry of Health Malaysia | Anasir MI; Azizan MA; Kamel K; Mohd Zawawi Z; Ramly N; Robert F; Suppiah J; Thayan R                                                                                                                                                                                        |
| EPI_ISL_3446714                                                                                                                                                                                                                                                                                                                                                                      | Telok Panglima Garang Health Clinic                                                                            | Institute for Medical Research, Infectious Disease Research Centre, National Institutes of Health, Ministry of Health Malaysia | Anasir MI; Azizan MA; Kamel K; Mohd Zawawi Z; Ramly N; Robert F; Suppiah J; Thayan R                                                                                                                                                                                        |
| EPI_ISL_3100126, EPI_ISL_3100172, EPI_ISL_3100173, EPI_ISL_3100174                                                                                                                                                                                                                                                                                                                   | Tengku Ampuan Afzan Hospital                                                                                   | Institute for Medical Research, Infectious Disease Research Centre, National Institutes of Health, Ministry of Health Malaysia | Anasir MI; Azizan MA; Kamel K; Mohd Zawawi Z; Ramly N; Robert F; Suppiah J; Thayan R                                                                                                                                                                                        |
| EPI_ISL_2811959                                                                                                                                                                                                                                                                                                                                                                      | Tengku Ampuan Afzan Hospital (HTAA)                                                                            | Institute for Medical Research, Infectious Disease Research Centre, National Institutes of Health, Ministry of Health Malaysia | Azizan MA; Kamel K; Mohd Zawawi Z; Ramly N; Robert F; Suppiah J; Thayan R                                                                                                                                                                                                   |
| EPI_ISL_2921997, EPI_ISL_3071857, EPI_ISL_3071858, EPI_ISL_3120114, EPI_ISL_3120115, EPI_ISL_3120138, EPI_ISL_3355519, EPI_ISL_3446659, EPI_ISL_3446660, EPI_ISL_3446661, EPI_ISL_4636748                                                                                                                                                                                            | Tengku Ampuan Rahimah Hospital                                                                                 | Institute for Medical Research, Infectious Disease Research Centre, National Institutes of Health, Ministry of Health Malaysia | Ahmad FA; Ahmad Fazilah NA; Anasir MI; Azizan MA; Kamel K; Mohd Zawawi Z; Norhishyam SN; Ramly N; Robert F; Suppiah J; Thayan R                                                                                                                                             |
| EPI_ISL_4096811, EPI_ISL_4101549, EPI_ISL_4101550                                                                                                                                                                                                                                                                                                                                    | Tenom District Health Office                                                                                   | Institute for Medical Research, Infectious Disease Research Centre, National Institutes of Health, Ministry of Health Malaysia | Ahmad FA; Ahmad Fazilah NA; Anasir MI; Azizan MA; Kamel K; Mohd Zawawi Z; Norhisham SN; Ramly N; Robert F; Suppiah J; Thayan R                                                                                                                                              |
| EPI_ISL_2921260, EPI_ISL_2921261                                                                                                                                                                                                                                                                                                                                                     | Terengganu State Health Department                                                                             | Institute for Medical Research, Infectious Disease Research Centre, National Institutes of Health, Ministry of Health Malaysia | Anasir MI; Azizan MA; Kamel K; Mohd Zawawi Z; Ramly N; Robert F; Suppiah J; Thayan R                                                                                                                                                                                        |
| EPI_ISL_4347590, EPI_ISL_4348365                                                                                                                                                                                                                                                                                                                                                     | Thomson Hospital Kota Damansara                                                                                | Institute for Medical Research, Infectious Disease Research Centre, National Institutes of Health, Ministry of Health Malaysia | Ahmad FA; Ahmad Fazilah NA; Anasir MI; Azizan MA; Kamel K; Mohd Zawawi Z; Norhishyam SN; Ramly N; Robert F; Suppiah J; Thayan R                                                                                                                                             |
| EPI_ISL_4601561, EPI_ISL_4601564                                                                                                                                                                                                                                                                                                                                                     | Thomson Hospital Kota Damansara                                                                                | Malaysia Genome Institute                                                                                                      | Azrin Ahmad; Enizza Kasim; Imri Suhayu Sapien; Mohd Faizal Abu Bakar; Mohd Ghows Mohd Azzam.; Mohd Noor Mat Isa; Nor Azfa Johari; Nurhezreen Mdd Iqbal; Shamsidar Sopie; Siti Noraini Othman; Yusuf Muhammad Noor                                                           |
| EPI_ISL_3429606                                                                                                                                                                                                                                                                                                                                                                      | Tropical Infectious Diseases Research and Education Centre (TIDREC), Universiti Malaya, Kuala Lumpur, Malaysia | Tropical Infectious Diseases Research and Education Centre (TIDREC), Universiti Malaya, Kuala Lumpur, Malaysia                 | AsmaAnati CheMatSer; Boon-Teong Teoh; Che-Norainon Yaacob; Chee-Sieng Khor; Jeffrey Johari; Jia-Yi Tan; Jo-Ern Wong; Juraina Abd-Jamili; Kim-Kee Tan; Mulya-Mustika-Sari Zukifli; Noor Syahida Azizan; Nur-Hidayana Mahfodz; Szazly AbuBakar; Siti-Sarah NorE; VunJia Tiong |
| EPI_ISL_2614744, EPI_ISL_2649992                                                                                                                                                                                                                                                                                                                                                     | Tuanku Ampuan Najihah Hospital, Kuala Pilah                                                                    | Institute for Medical Research, Infectious Disease Research Centre, National Institutes of Health, Ministry of Health Malaysia | Azizan MA; Kamel K; Mohd Zawawi Z; Ramly N; Robert F; Suppiah J; Thayan R                                                                                                                                                                                                   |
| EPI_ISL_2649994                                                                                                                                                                                                                                                                                                                                                                      | Tuanku Fauziah Hospital                                                                                        | Institute for Medical Research, Infectious Disease Research Centre, National Institutes of Health, Ministry of Health Malaysia | Azizan MA; Kamel K; Mohd Zawawi Z; Ramly N; Robert F; Suppiah J; Thayan R                                                                                                                                                                                                   |
| EPI_ISL_2931922, EPI_ISL_3333562                                                                                                                                                                                                                                                                                                                                                     | Tuanku Fauziah Hospital                                                                                        | Institute for Medical Research, Infectious Disease Research Centre, National Institutes of Health, Ministry of Health Malaysia | Anasir MI; Azizan MA; Kamel K; Mohd Zawawi Z; Ramly N; Robert F; Suppiah J; Thayan R                                                                                                                                                                                        |
| EPI_ISL_2650006, EPI_ISL_2811872                                                                                                                                                                                                                                                                                                                                                     | Tumpat Hospital                                                                                                | Institute for Medical Research, Infectious Disease Research Centre, National Institutes of Health, Ministry of Health Malaysia | Azizan MA; Kamel K; Mohd Zawawi Z; Ramly N; Robert F; Suppiah J; Thayan R                                                                                                                                                                                                   |
| EPI_ISL_1068996, EPI_ISL_1068997, EPI_ISL_1068998, EPI_ISL_1068999, EPI_ISL_1069076, EPI_ISL_1069078                                                                                                                                                                                                                                                                                 | UCSI University                                                                                                | Institute for Medical Research, Infectious Disease Research Centre, National Institutes of Health, Ministry of Health Malaysia | Azizan MA; Kamel K; Sekaran SD; Suppiah J; Thayan R                                                                                                                                                                                                                         |
| EPI_ISL_3769374, EPI_ISL_3769376                                                                                                                                                                                                                                                                                                                                                     | UKA                                                                                                            | IPROMISE, UITM                                                                                                                 | Ariza Adnan; Fadzilah Mohd Nor; Lim Wai Feng; Mohd Asif Mohd Sukri; Mohd Nur Fakhruzzaman Noorizhab; Mohd Zaki Salleh; Sazzli Shahlan Kassim; Siti Farah Alwani Mohd Naw; Siti Hamimah Sheikh Abdul Kadir; Teh Lay Kek; Wang Seok Mui                                       |
| EPI_ISL_3858148                                                                                                                                                                                                                                                                                                                                                                      | UKA HPSF                                                                                                       | UKM Medical Molecular Biology Institute (UMBI)                                                                                 | Mira Farzana binti Mohamad Mokhtar                                                                                                                                                                                                                                          |
| EPI_ISL_4236990                                                                                                                                                                                                                                                                                                                                                                      | UKA HPSF MUAR                                                                                                  | UKM Medical Molecular Biology Institute (UMBI)                                                                                 | Mira Farzana binti Mohamad Mokhtar                                                                                                                                                                                                                                          |
| EPI_ISL_4236985, EPI_ISL_4236992                                                                                                                                                                                                                                                                                                                                                     | UKKP,HOSPITAL PERMAI                                                                                           | UKM Medical Molecular Biology Institute (UMBI)                                                                                 | Mira Farzana binti Mohamad Mokhtar                                                                                                                                                                                                                                          |

|                                                                                                                                                                                                                                                                                                 |                                                                   |                                                                                                                                |                                                                                                                                                                                                                                        |
|-------------------------------------------------------------------------------------------------------------------------------------------------------------------------------------------------------------------------------------------------------------------------------------------------|-------------------------------------------------------------------|--------------------------------------------------------------------------------------------------------------------------------|----------------------------------------------------------------------------------------------------------------------------------------------------------------------------------------------------------------------------------------|
| EPI_ISL_4435522                                                                                                                                                                                                                                                                                 | UNIT FORENSIK SUNGAI BAKAP                                        | iPROMISE, Uitm                                                                                                                 | Ariza Adnan; Fadzilah Mohd Nor; Lim Wai Feng; Mohd Asif Mohd Sukri; Mohd Nur Fakhruzzaman Noorizhab; Mohd Zaki Salleh; Sazzli Shahlan Kassim; Siti Farah Alwani Mohd Nawi; Siti Hamimah Sheikh Abdul Kadir; Teh Lay Kek; Wang Seok Mui |
| EPI_ISL_3980698                                                                                                                                                                                                                                                                                 | UNIT KESELAMATAN DAN KESIHATAN HOSPITAL SULTANAH BAHYIAH          | Tropical Infectious Diseases Research & Education Centre (TIDREC), Universiti Malaya                                           | AsmaAnati CheMatSeri; Che-Norainon Yaacob; Jia-Yi Tan; Jo-Ern Wong; Kim-Kee Tan; Mulya-Mustika-Sari Zulkifli; Noor Syahida Azizan; Nur-Hidayana Mahfodz; Sazaly AbuBakar; Siti-Sarah Nor'e                                             |
| EPI_ISL_3980712                                                                                                                                                                                                                                                                                 | UNIT KESELAMATAN DAN KESIHATAN PEKERJA                            | Tropical Infectious Diseases Research & Education Centre (TIDREC), Universiti Malaya                                           | AsmaAnati CheMatSeri; Che-Norainon Yaacob; Jia-Yi Tan; Jo-Ern Wong; Kim-Kee Tan; Mulya-Mustika-Sari Zulkifli; Noor Syahida Azizan; Nur-Hidayana Mahfodz; Sazaly AbuBakar; Siti-Sarah Nor'e                                             |
| EPI_ISL_3980696, EPI_ISL_3980697                                                                                                                                                                                                                                                                | UNIT KESELAMATAN DAN KESIHATAN PEKERJA HOSPITAL SULTANAH BAHYIAH  | Tropical Infectious Diseases Research & Education Centre (TIDREC), Universiti Malaya                                           | AsmaAnati CheMatSeri; Che-Norainon Yaacob; Jia-Yi Tan; Jo-Ern Wong; Kim-Kee Tan; Mulya-Mustika-Sari Zulkifli; Noor Syahida Azizan; Nur-Hidayana Mahfodz; Sazaly AbuBakar; Siti-Sarah Nor'e                                             |
| EPI_ISL_4236986                                                                                                                                                                                                                                                                                 | UNIT KESIHATAN AWAM                                               | UKM Medical Molecular Biology Institute (UMBI)                                                                                 | Mira Farzana binti Mohamad Mokhtar                                                                                                                                                                                                     |
| EPI_ISL_3980730                                                                                                                                                                                                                                                                                 | UNIT KESIHATAN AWAM (UKA), HRPZ II                                | Tropical Infectious Diseases Research & Education Centre (TIDREC), Universiti Malaya                                           | AsmaAnati CheMatSeri; Che-Norainon Yaacob; Jia-Yi Tan; Jo-Ern Wong; Kim-Kee Tan; Mulya-Mustika-Sari Zulkifli; Noor Syahida Azizan; Nur-Hidayana Mahfodz; Sazaly AbuBakar; Siti-Sarah Nor'e                                             |
| EPI_ISL_3980732                                                                                                                                                                                                                                                                                 | UNIT KESIHATAN AWAM , HRPZII                                      | Tropical Infectious Diseases Research & Education Centre (TIDREC), Universiti Malaya                                           | AsmaAnati CheMatSeri; Che-Norainon Yaacob; Jia-Yi Tan; Jo-Ern Wong; Kim-Kee Tan; Mulya-Mustika-Sari Zulkifli; Noor Syahida Azizan; Nur-Hidayana Mahfodz; Sazaly AbuBakar; Siti-Sarah Nor'e                                             |
| EPI_ISL_3980733                                                                                                                                                                                                                                                                                 | UNIT KESIHATAN AWAM ,UKA . HRPZ                                   | Tropical Infectious Diseases Research & Education Centre (TIDREC), Universiti Malaya                                           | AsmaAnati CheMatSeri; Che-Norainon Yaacob; Jia-Yi Tan; Jo-Ern Wong; Kim-Kee Tan; Mulya-Mustika-Sari Zulkifli; Noor Syahida Azizan; Nur-Hidayana Mahfodz; Sazaly AbuBakar; Siti-Sarah Nor'e                                             |
| EPI_ISL_3858183, EPI_ISL_4071988, EPI_ISL_4071996, EPI_ISL_4101594, EPI_ISL_4236989, EPI_ISL_4236991, EPI_ISL_4236994, EPI_ISL_4513500, EPI_ISL_4513501, EPI_ISL_4513502, EPI_ISL_4513503, EPI_ISL_4513505, EPI_ISL_4513509                                                                     | UNIT KESIHATAN AWAM HEBHK                                         | UKM Medical Molecular Biology Institute (UMBI)                                                                                 | Mira Farzana binti Mohamad Mokhtar                                                                                                                                                                                                     |
| see above                                                                                                                                                                                                                                                                                       | UNIT KESIHATAN AWAM HRPZII                                        | Tropical Infectious Diseases Research & Education Centre (TIDREC), Universiti Malaya                                           | AsmaAnati CheMatSeri; Che-Norainon Yaacob; Jia-Yi Tan; Jo-Ern Wong; Kim-Kee Tan; Mulya-Mustika-Sari Zulkifli; Noor Syahida Azizan; Nur-Hidayana Mahfodz; Sazaly AbuBakar; Siti-Sarah Nor'e                                             |
| EPI_ISL_4513504                                                                                                                                                                                                                                                                                 | UNIT KESIHATAN AWAM UKA                                           | UKM Medical Molecular Biology Institute (UMBI)                                                                                 | Mira Farzana binti Mohamad Mokhtar                                                                                                                                                                                                     |
| EPI_ISL_3980734                                                                                                                                                                                                                                                                                 | UNIT KESIHATAN AWAM(UKA) HRPZ                                     | Tropical Infectious Diseases Research & Education Centre (TIDREC), Universiti Malaya                                           | AsmaAnati CheMatSeri; Che-Norainon Yaacob; Jia-Yi Tan; Jo-Ern Wong; Kim-Kee Tan; Mulya-Mustika-Sari Zulkifli; Noor Syahida Azizan; Nur-Hidayana Mahfodz; Sazaly AbuBakar; Siti-Sarah Nor'e                                             |
| EPI_ISL_3980702                                                                                                                                                                                                                                                                                 | UNIT KESIHATAN DAN KESELAMATA PEKERJA HOSPITAL SULTANAH BAHYIAH   | Tropical Infectious Diseases Research & Education Centre (TIDREC), Universiti Malaya                                           | AsmaAnati CheMatSeri; Che-Norainon Yaacob; Jia-Yi Tan; Jo-Ern Wong; Kim-Kee Tan; Mulya-Mustika-Sari Zulkifli; Noor Syahida Azizan; Nur-Hidayana Mahfodz; Sazaly AbuBakar; Siti-Sarah Nor'e                                             |
| EPI_ISL_3980701, EPI_ISL_3980703, EPI_ISL_3980706                                                                                                                                                                                                                                               | UNIT KESIHATAN DAN KESELAMATAN HOSPITAL SULTANAH BAHYIAH          | Tropical Infectious Diseases Research & Education Centre (TIDREC), Universiti Malaya                                           | AsmaAnati CheMatSeri; Che-Norainon Yaacob; Jia-Yi Tan; Jo-Ern Wong; Kim-Kee Tan; Mulya-Mustika-Sari Zulkifli; Noor Syahida Azizan; Nur-Hidayana Mahfodz; Sazaly AbuBakar; Siti-Sarah Nor'e                                             |
| EPI_ISL_3980700, EPI_ISL_3980704, EPI_ISL_3980705, EPI_ISL_3980707                                                                                                                                                                                                                              | UNIT KESIHATAN DAN KESELAMATAN PEKERJA HOSPITAL SULTANAH BAHYIAH  | Tropical Infectious Diseases Research & Education Centre (TIDREC), Universiti Malaya                                           | AsmaAnati CheMatSeri; Che-Norainon Yaacob; Jia-Yi Tan; Jo-Ern Wong; Kim-Kee Tan; Mulya-Mustika-Sari Zulkifli; Noor Syahida Azizan; Nur-Hidayana Mahfodz; Sazaly AbuBakar; Siti-Sarah Nor'e                                             |
| EPI_ISL_3980699                                                                                                                                                                                                                                                                                 | UNIT KESIHATAN DAN KESIHATAN PEKERJA HOSPITAL SULTANAH BAHYIAH    | Tropical Infectious Diseases Research & Education Centre (TIDREC), Universiti Malaya                                           | AsmaAnati CheMatSeri; Che-Norainon Yaacob; Jia-Yi Tan; Jo-Ern Wong; Kim-Kee Tan; Mulya-Mustika-Sari Zulkifli; Noor Syahida Azizan; Nur-Hidayana Mahfodz; Sazaly AbuBakar; Siti-Sarah Nor'e                                             |
| EPI_ISL_3858141, EPI_ISL_3858150, EPI_ISL_3858152, EPI_ISL_3858157, EPI_ISL_3858161, EPI_ISL_3858165, EPI_ISL_3858167, EPI_ISL_3858176, EPI_ISL_3858180, EPI_ISL_3858182, EPI_ISL_4101585, EPI_ISL_4463179, EPI_ISL_4463180, EPI_ISL_4463185, EPI_ISL_4463187, EPI_ISL_4463188, EPI_ISL_4513499 | UNIT KPAS, PKD MELAKA TENGAH                                      | UKM Medical Molecular Biology Institute (UMBI)                                                                                 | Mira Farzana binti Mohamad Mokhtar; Nur Alyaa Afifah Md Shahri                                                                                                                                                                         |
| see above                                                                                                                                                                                                                                                                                       | UNIT MIKROBIOLOGI, JABATAN PATOLOGI, HOSPITAL PULAU PINANG        | iPROMISE, Uitm                                                                                                                 | Ariza Adnan; Fadzilah Mohd Nor; Lim Wai Feng; Mohd Asif Mohd Sukri; Mohd Nur Fakhruzzaman Noorizhab; Mohd Zaki Salleh; Sazzli Shahlan Kassim; Siti Farah Alwani Mohd Nawi; Siti Hamimah Sheikh Abdul Kadir; Teh Lay Kek; Wang Seok Mui |
| EPI_ISL_3980736, EPI_ISL_3980738, EPI_ISL_3980739, EPI_ISL_4565018, EPI_ISL_4565019, EPI_ISL_4565020, EPI_ISL_4565021, EPI_ISL_4565022, EPI_ISL_4565024, EPI_ISL_4565026, EPI_ISL_4565028                                                                                                       | UNIT OSH, HOSPITAL SUNGAI BULOH                                   | Tropical Infectious Diseases Research & Education Centre (TIDREC), Universiti Malaya                                           | AsmaAnati CheMatSeri; Che-Norainon Yaacob; Jia-Yi Tan; Jo-Ern Wong; Kim-Kee Tan; Mulya-Mustika-Sari Zulkifli; Noor Syahida Azizan; Nur-Hidayana Mahfodz; Sazaly AbuBakar; Siti-Sarah Nor'e                                             |
| see above                                                                                                                                                                                                                                                                                       | UNIT OSH, HOSPITAL SUNGAI BULOH                                   | iPROMISE, Uitm                                                                                                                 | Ariza Adnan; Fadzilah Mohd Nor; Lim Wai Feng; Mohd Asif Mohd Sukri; Mohd Nur Fakhruzzaman Noorizhab; Mohd Zaki Salleh; Sazzli Shahlan Kassim; Siti Farah Alwani Mohd Nawi; Siti Hamimah Sheikh Abdul Kadir; Teh Lay Kek; Wang Seok Mui |
| EPI_ISL_3769375, EPI_ISL_3769377, EPI_ISL_3769379, EPI_ISL_3769380, EPI_ISL_3769381, EPI_ISL_3769382                                                                                                                                                                                            | Unit Kawalan Penyakit Berjangkit, Jabatan Kesihatan Negeri Perlis | iPROMISE, Uitm                                                                                                                 | Ariza Adnan; Fadzilah Mohd Nor; Lim Wai Feng; Mohd Asif Mohd Sukri; Mohd Nur Fakhruzzaman Noorizhab; Mohd Zaki Salleh; Sazzli Shahlan Kassim; Siti Farah Alwani Mohd Nawi; Siti Hamimah Sheikh Abdul Kadir; Teh Lay Kek; Wang Seok Mui |
| EPI_ISL_3374426                                                                                                                                                                                                                                                                                 | Uitm Sungai Buloh Hospital                                        | Institute for Medical Research, Infectious Disease Research Centre, National Institutes of Health, Ministry of Health Malaysia | Anasir MI; Azizan MA; Kamel K; Mohd Zawawi Z; Ramly N; Robert F; Suppiah J; Thayan R                                                                                                                                                   |
| EPI_ISL_3980740                                                                                                                                                                                                                                                                                 | Uka HBTG                                                          | Tropical Infectious Diseases Research & Education Centre (TIDREC), Universiti Malaya                                           | AsmaAnati CheMatSeri; Che-Norainon Yaacob; Jia-Yi Tan; Jo-Ern Wong; Kim-Kee Tan; Mulya-Mustika-Sari Zulkifli; Noor Syahida Azizan; Nur-Hidayana Mahfodz; Sazaly AbuBakar; Siti-Sarah Nor'e                                             |
| EPI_ISL_3980742                                                                                                                                                                                                                                                                                 | Uka Hosp.Banting                                                  | Tropical Infectious Diseases Research & Education Centre (TIDREC), Universiti Malaya                                           | AsmaAnati CheMatSeri; Che-Norainon Yaacob; Jia-Yi Tan; Jo-Ern Wong; Kim-Kee Tan; Mulya-Mustika-Sari Zulkifli; Noor Syahida Azizan; Nur-Hidayana Mahfodz; Sazaly AbuBakar; Siti-Sarah Nor'e                                             |
| EPI_ISL_3980737, EPI_ISL_3980746                                                                                                                                                                                                                                                                | Uka Hospital Banting                                              | Tropical Infectious Diseases Research & Education Centre (TIDREC), Universiti Malaya                                           | AsmaAnati CheMatSeri; Che-Norainon Yaacob; Jia-Yi Tan; Jo-Ern Wong; Kim-Kee Tan; Mulya-Mustika-Sari Zulkifli; Noor Syahida Azizan; Nur-Hidayana Mahfodz; Sazaly AbuBakar; Siti-Sarah Nor'e                                             |
| EPI_ISL_3980744                                                                                                                                                                                                                                                                                 | Uka Hospital Bnating                                              | Tropical Infectious Diseases Research & Education Centre (TIDREC), Universiti Malaya                                           | AsmaAnati CheMatSeri; Che-Norainon Yaacob; Jia-Yi Tan; Jo-Ern Wong; Kim-Kee Tan; Mulya-Mustika-Sari Zulkifli; Noor Syahida Azizan; Nur-Hidayana Mahfodz; Sazaly AbuBakar; Siti-Sarah Nor'e                                             |
| EPI_ISL_4122458, EPI_ISL_4435551                                                                                                                                                                                                                                                                | Unit Keselamatan dan Kesihatan Pekerja                            | Tropical Infectious Diseases Research & Education Centre (TIDREC), Universiti Malaya                                           | AsmaAnati CheMatSeri; Che-Norainon Yaacob; Jia-Yi Tan; Jo-Ern Wong; Kim-Kee Tan; Mulya-Mustika-Sari Zulkifli; Noor Syahida Azizan; Nur-Hidayana Mahfodz; Sazaly AbuBakar; Siti-Sarah Nor'e                                             |
| EPI_ISL_3980719, EPI_ISL_3980721                                                                                                                                                                                                                                                                | Unit keselamatan dan Kesihatan Pekerjaan                          | UKM Medical Molecular Biology Institute (UMBI)                                                                                 | Mira Farzana binti Mohamad Mokhtar                                                                                                                                                                                                     |
| EPI_ISL_4513498                                                                                                                                                                                                                                                                                 | Unit keselamatan dan Kesihatan Pekerjaan Hospital Melaka          | UKM Medical Molecular Biology Institute (UMBI)                                                                                 | Mira Farzana binti Mohamad Mokhtar                                                                                                                                                                                                     |
| EPI_ISL_2811875                                                                                                                                                                                                                                                                                 | Universiti Sains Malaysia Hospital                                | Institute for Medical Research, Infectious Disease Research Centre, National Institutes of Health, Ministry of Health Malaysia | Azizan MA; Kamel K; Mohd Zawawi Z; Ramly N; Robert F; Suppiah J; Thayan R                                                                                                                                                              |
| EPI_ISL_877229, EPI_ISL_877230, EPI_ISL_877231, EPI_ISL_877232, EPI_ISL_877233, EPI_ISL_877234, EPI_ISL_877235, EPI_ISL_877236, EPI_ISL_877329, EPI_ISL_877330                                                                                                                                  | University College Sedaya International (UCSI University)         | Institute for Medical Research, Infectious Disease Research Centre, National Institutes of Health, Ministry of Health Malaysia | Azizan MA; Kamel K; Sekaran SD; Suppiah J; Thayan R                                                                                                                                                                                    |
| see above                                                                                                                                                                                                                                                                                       | Unit keselamatan dan Kesihatan Pekerjaan                          | Tropical Infectious Diseases Research & Education Centre (TIDREC), Universiti Malaya                                           | AsmaAnati CheMatSeri; Che-Norainon Yaacob; Jia-Yi Tan; Jo-Ern Wong; Kim-Kee Tan; Mulya-Mustika-Sari Zulkifli; Noor Syahida Azizan; Nur-Hidayana Mahfodz; Sazaly AbuBakar; Siti-Sarah Nor'e                                             |
| EPI_ISL_3980729                                                                                                                                                                                                                                                                                 | klinik kesihatan perol                                            | Tropical Infectious Diseases Research & Education Centre (TIDREC), Universiti Malaya                                           | AsmaAnati CheMatSeri; Che-Norainon Yaacob; Jia-Yi Tan; Jo-Ern Wong; Kim-Kee Tan; Mulya-Mustika-Sari Zulkifli; Noor Syahida Azizan; Nur-Hidayana Mahfodz; Sazaly AbuBakar; Siti-Sarah Nor'e                                             |

We gratefully acknowledge the following Authors from the Originating laboratories responsible for obtaining the specimens, as well as the Submitting laboratories where the genome data were generated and shared via GISAID, on which this research is based.

All Submitters of data may be contacted directly via [www.gisaid.org](http://www.gisaid.org)

Authors are sorted alphabetically.

| Accession ID                                                                                                                                                                                                                                                                   | Originating Laboratory       | Submitting Laboratory                                                                                                                                                                                                                                                                                                                       | Authors                             |
|--------------------------------------------------------------------------------------------------------------------------------------------------------------------------------------------------------------------------------------------------------------------------------|------------------------------|---------------------------------------------------------------------------------------------------------------------------------------------------------------------------------------------------------------------------------------------------------------------------------------------------------------------------------------------|-------------------------------------|
| EPI_ISL_3538928, EPI_ISL_3538933                                                                                                                                                                                                                                               | IPL                          | Institut Pasteur du Laos                                                                                                                                                                                                                                                                                                                    | ; Somphavan Somlor; Vincent Lacoste |
| EPI_ISL_3538929, EPI_ISL_3538930, EPI_ISL_3538931, EPI_ISL_3538932, EPI_ISL_3538934, EPI_ISL_3538935, EPI_ISL_3538936, EPI_ISL_3538937, EPI_ISL_3538938, EPI_ISL_3538939, EPI_ISL_3538940, EPI_ISL_3538941, EPI_ISL_3538942, EPI_ISL_3538943, EPI_ISL_3538944, EPI_ISL_3538945 |                              |                                                                                                                                                                                                                                                                                                                                             |                                     |
| see above                                                                                                                                                                                                                                                                      | NCLE                         | Institut Pasteur du Laos                                                                                                                                                                                                                                                                                                                    | ; Somphavan Somlor; Vincent Lacoste |
| EPI_ISL_4302644, EPI_ISL_4302645, EPI_ISL_4302646, EPI_ISL_4302647, EPI_ISL_4302648                                                                                                                                                                                            | The Institut Pasteur du Laos | Pathogen Discovery Laboratory, Institut Pasteur                                                                                                                                                                                                                                                                                             |                                     |
|                                                                                                                                                                                                                                                                                |                              | Baquero Salazar, E.; Bigot, T.; Bonomi, M.; Brey; Chretien, D.; Donati, F.; Douangboubpha, B.; Karami, Y.; Lacoste, V.; Lakeomany, K.; Munier, S.; Nilges, M.; P.T. and Eloit, M.; Paphaphanh, P.; Perot, P.; Phommavanh, N.; Regnault, B.; Rey, F.; Sanamxay, D.; Somlor, S.; Temmam, S.; Vongphayloth, K.; Xayaphet, V.; van der Werf, S. |                                     |











|                                                                                                                                |         |
|--------------------------------------------------------------------------------------------------------------------------------|---------|
| see above                                                                                                                      | unknown |
| EPI_ISL_468724, EPI_ISL_468725                                                                                                 | unknown |
| EPI_ISL_462439, EPI_ISL_462440, EPI_ISL_462441, EPI_ISL_462442, EPI_ISL_462443, EPI_ISL_462444, EPI_ISL_462445, EPI_ISL_462446 | unknown |
| see above                                                                                                                      | unknown |

|                                                                                                    |
|----------------------------------------------------------------------------------------------------|
| Contact:Hiroyuki Asakura Tokyo Metropolitan Institute of Public Health, Department of Microbiology |
| Contact:Ryota Kumagai Tokyo Metropolitan Institute of Public Health                                |
| Ryota Kumagai Tokyo Metropolitan Institute of Public Health                                        |

|                                                                               |
|-------------------------------------------------------------------------------|
| Asakura, H.; Chiba, T.; Kumagai, R.; Nagashima, M.; Sadamasu, K.; Yoshida, I. |
| Asakura, H.; Chiba, T.; Kumagai, R.; Nagashima, M.; Sadamasu, K.; Yoshida, I. |
| Asakura, H.; Chiba, T.; Kumagai, R.; Nagashima, M.; Sadamasu, K.; Yoshida, I. |



|                                                                                                                                                                                                                                                                                                                                                                                                                                                                                                                                                                                                                                                                                                                                                                                                                                                                                                                                                                                                                                                                                                                                                                                                                                                                                                                                                                                                                                                                                                                                                                                                                                                                                                                                                                                                                                                                                                                                                                                                                                                                                                                                                                                                                                                                                                                                                                                                                                                                                                                                                                                                                                                                                                                                                                                                                                                                                                                                                                                                                                                                                                                                                                                                                                                                                                                                                                                                                                                                                                                                                                                                                                                                                                                                                                                                                                                                                                                                                                                                                                                                    |                                                                                       |                                                                                                                                                                                                 |                                                                                                 |                                                                                                             |
|--------------------------------------------------------------------------------------------------------------------------------------------------------------------------------------------------------------------------------------------------------------------------------------------------------------------------------------------------------------------------------------------------------------------------------------------------------------------------------------------------------------------------------------------------------------------------------------------------------------------------------------------------------------------------------------------------------------------------------------------------------------------------------------------------------------------------------------------------------------------------------------------------------------------------------------------------------------------------------------------------------------------------------------------------------------------------------------------------------------------------------------------------------------------------------------------------------------------------------------------------------------------------------------------------------------------------------------------------------------------------------------------------------------------------------------------------------------------------------------------------------------------------------------------------------------------------------------------------------------------------------------------------------------------------------------------------------------------------------------------------------------------------------------------------------------------------------------------------------------------------------------------------------------------------------------------------------------------------------------------------------------------------------------------------------------------------------------------------------------------------------------------------------------------------------------------------------------------------------------------------------------------------------------------------------------------------------------------------------------------------------------------------------------------------------------------------------------------------------------------------------------------------------------------------------------------------------------------------------------------------------------------------------------------------------------------------------------------------------------------------------------------------------------------------------------------------------------------------------------------------------------------------------------------------------------------------------------------------------------------------------------------------------------------------------------------------------------------------------------------------------------------------------------------------------------------------------------------------------------------------------------------------------------------------------------------------------------------------------------------------------------------------------------------------------------------------------------------------------------------------------------------------------------------------------------------------------------------------------------------------------------------------------------------------------------------------------------------------------------------------------------------------------------------------------------------------------------------------------------------------------------------------------------------------------------------------------------------------------------------------------------------------------------------------------------------|---------------------------------------------------------------------------------------|-------------------------------------------------------------------------------------------------------------------------------------------------------------------------------------------------|-------------------------------------------------------------------------------------------------|-------------------------------------------------------------------------------------------------------------|
| EPI_ISL_2671866, EPI_ISL_2671867, EPI_ISL_2671868, EPI_ISL_2671869, EPI_ISL_2671870, EPI_ISL_2671871, EPI_ISL_2671872, EPI_ISL_2671873, EPI_ISL_2671874, EPI_ISL_2671875, EPI_ISL_2671876, EPI_ISL_2671877, EPI_ISL_2671878, EPI_ISL_2671879, EPI_ISL_2671880, EPI_ISL_2671881, EPI_ISL_2671882, EPI_ISL_2671883, EPI_ISL_2671884, EPI_ISL_2671885, EPI_ISL_2671886, EPI_ISL_2671887                                                                                                                                                                                                                                                                                                                                                                                                                                                                                                                                                                                                                                                                                                                                                                                                                                                                                                                                                                                                                                                                                                                                                                                                                                                                                                                                                                                                                                                                                                                                                                                                                                                                                                                                                                                                                                                                                                                                                                                                                                                                                                                                                                                                                                                                                                                                                                                                                                                                                                                                                                                                                                                                                                                                                                                                                                                                                                                                                                                                                                                                                                                                                                                                                                                                                                                                                                                                                                                                                                                                                                                                                                                                               | see above                                                                             | Department of Virology I, National Institute of Infectious Diseases                                                                                                                             | Department of Veterinary Science, National Institute of Infectious Diseases                     | Keita Ishijima; Ken Maeda; Shuetsu Fukushi; Souichi Yamada; Tsuguto Fujimoto; Tsukasa Yamamoto; Yuda Kuroda |
| EPI_ISL_2509329, EPI_ISL_2509372, EPI_ISL_2509373, EPI_ISL_2509396, EPI_ISL_2509397, EPI_ISL_2509806, EPI_ISL_2509933, EPI_ISL_2509961, EPI_ISL_2510089, EPI_ISL_2510297, EPI_ISL_2510298, EPI_ISL_2510299, EPI_ISL_2510300, EPI_ISL_2614629, EPI_ISL_2614630, EPI_ISL_2614631, EPI_ISL_2614632, EPI_ISL_2614633, EPI_ISL_2614634, EPI_ISL_2614635, EPI_ISL_2614636, EPI_ISL_2614637, EPI_ISL_2614638, EPI_ISL_2614639, EPI_ISL_2614640, EPI_ISL_2614641, EPI_ISL_2614642                                                                                                                                                                                                                                                                                                                                                                                                                                                                                                                                                                                                                                                                                                                                                                                                                                                                                                                                                                                                                                                                                                                                                                                                                                                                                                                                                                                                                                                                                                                                                                                                                                                                                                                                                                                                                                                                                                                                                                                                                                                                                                                                                                                                                                                                                                                                                                                                                                                                                                                                                                                                                                                                                                                                                                                                                                                                                                                                                                                                                                                                                                                                                                                                                                                                                                                                                                                                                                                                                                                                                                                          | see above                                                                             | Dr. Yoshitaka Tamura Department of Clinical Laboratory, Osaka Habikino Medical Center                                                                                                           | Department of Developmental Medicine, Research Institute, Osaka Women's and Children's Hospital | Itaru Yanagihara; Yukiko Nakur; Yukiko Nakura                                                               |
| EPI_ISL_2509337                                                                                                                                                                                                                                                                                                                                                                                                                                                                                                                                                                                                                                                                                                                                                                                                                                                                                                                                                                                                                                                                                                                                                                                                                                                                                                                                                                                                                                                                                                                                                                                                                                                                                                                                                                                                                                                                                                                                                                                                                                                                                                                                                                                                                                                                                                                                                                                                                                                                                                                                                                                                                                                                                                                                                                                                                                                                                                                                                                                                                                                                                                                                                                                                                                                                                                                                                                                                                                                                                                                                                                                                                                                                                                                                                                                                                                                                                                                                                                                                                                                    | Dr. Yoshitaka Tamura Department of Clinical Laboratory, Osaka Habikino Medical Center | Department of Developmental Medicine, Research Institute, Osaka Women's and Children's Hospital Department of Developmental Medicine, Research Institute, Osaka Women's and Children's Hospital | Itaru Yanagihara; Yukiko Nakura                                                                 |                                                                                                             |
| EPI_ISL_2614634, EPI_ISL_2614635, EPI_ISL_2614636, EPI_ISL_2614637, EPI_ISL_2614638, EPI_ISL_2614641, EPI_ISL_2614642                                                                                                                                                                                                                                                                                                                                                                                                                                                                                                                                                                                                                                                                                                                                                                                                                                                                                                                                                                                                                                                                                                                                                                                                                                                                                                                                                                                                                                                                                                                                                                                                                                                                                                                                                                                                                                                                                                                                                                                                                                                                                                                                                                                                                                                                                                                                                                                                                                                                                                                                                                                                                                                                                                                                                                                                                                                                                                                                                                                                                                                                                                                                                                                                                                                                                                                                                                                                                                                                                                                                                                                                                                                                                                                                                                                                                                                                                                                                              | see above                                                                             | Dr. Yuichiro Oba Department of General Medicine, Osaka General Medical Center                                                                                                                   | Department of Developmental Medicine, Research Institute, Osaka Women's and Children's Hospital | Itaru Yanagihara; Yukiko Nakura                                                                             |
| EPI_ISL_2357237, EPI_ISL_2357238, EPI_ISL_2357239, EPI_ISL_2357240, EPI_ISL_2357241, EPI_ISL_2357242, EPI_ISL_2357243, EPI_ISL_2357244, EPI_ISL_2357245, EPI_ISL_2357246, EPI_ISL_2357247, EPI_ISL_2357248, EPI_ISL_2357249, EPI_ISL_2357250, EPI_ISL_2357251, EPI_ISL_2357252, EPI_ISL_2357253, EPI_ISL_2357254, EPI_ISL_2357255, EPI_ISL_2357256, EPI_ISL_2357257, EPI_ISL_2357258, EPI_ISL_2357259, EPI_ISL_2357260, EPI_ISL_2357261, EPI_ISL_2357262, EPI_ISL_2357263, EPI_ISL_2357264, EPI_ISL_2357265, EPI_ISL_2357266, EPI_ISL_2357267, EPI_ISL_2357268, EPI_ISL_2357269, EPI_ISL_2357270, EPI_ISL_2357271, EPI_ISL_2357272, EPI_ISL_2357273, EPI_ISL_2357274, EPI_ISL_2357275, EPI_ISL_2357276, EPI_ISL_2357277, EPI_ISL_2357278, EPI_ISL_2357279, EPI_ISL_2357280, EPI_ISL_2357281, EPI_ISL_2357282, EPI_ISL_2357283, EPI_ISL_2357284, EPI_ISL_2357285, EPI_ISL_2357286, EPI_ISL_2357287, EPI_ISL_2357288, EPI_ISL_2357289, EPI_ISL_2357290, EPI_ISL_2357291, EPI_ISL_2357292, EPI_ISL_2357293, EPI_ISL_2357294, EPI_ISL_2357295, EPI_ISL_2357296, EPI_ISL_2357297, EPI_ISL_2357298, EPI_ISL_2357299, EPI_ISL_2357300, EPI_ISL_2357301, EPI_ISL_2357302, EPI_ISL_2357303, EPI_ISL_2357304, EPI_ISL_2357305, EPI_ISL_2357306, EPI_ISL_2357307, EPI_ISL_2357308, EPI_ISL_2357309, EPI_ISL_2357310, EPI_ISL_2357311, EPI_ISL_2357312, EPI_ISL_2357313, EPI_ISL_2357314, EPI_ISL_2357315, EPI_ISL_2357316, EPI_ISL_2357317, EPI_ISL_2357318, EPI_ISL_2357319, EPI_ISL_2357320, EPI_ISL_2357321, EPI_ISL_2357322, EPI_ISL_2357323, EPI_ISL_2357324, EPI_ISL_2357325, EPI_ISL_2357326, EPI_ISL_2357327, EPI_ISL_2357328, EPI_ISL_2357329, EPI_ISL_2357330, EPI_ISL_2357331, EPI_ISL_2357332, EPI_ISL_2357333, EPI_ISL_2357334, EPI_ISL_2357335, EPI_ISL_2357336, EPI_ISL_2357337, EPI_ISL_2357338, EPI_ISL_2357339, EPI_ISL_2357340, EPI_ISL_2357341, EPI_ISL_2357342, EPI_ISL_2357343, EPI_ISL_2357344, EPI_ISL_2357345, EPI_ISL_2357346, EPI_ISL_2357347, EPI_ISL_2357348, EPI_ISL_2357349, EPI_ISL_2357350, EPI_ISL_2357351, EPI_ISL_2357352, EPI_ISL_2357353, EPI_ISL_2357354, EPI_ISL_2357355, EPI_ISL_2357356, EPI_ISL_2357357, EPI_ISL_2357358, EPI_ISL_2357359, EPI_ISL_2357360, EPI_ISL_2357361, EPI_ISL_2357362, EPI_ISL_2357363, EPI_ISL_2357364, EPI_ISL_2357365, EPI_ISL_2357366, EPI_ISL_2357367, EPI_ISL_2357368, EPI_ISL_2357369, EPI_ISL_2357370, EPI_ISL_2357371, EPI_ISL_2357372, EPI_ISL_2357373, EPI_ISL_2357374, EPI_ISL_2357375, EPI_ISL_2357376, EPI_ISL_2357377, EPI_ISL_2357378, EPI_ISL_2357379, EPI_ISL_2357380, EPI_ISL_2357381, EPI_ISL_2357382, EPI_ISL_2357383, EPI_ISL_2357384, EPI_ISL_2357385, EPI_ISL_2357386, EPI_ISL_2357387, EPI_ISL_2357388, EPI_ISL_2357389, EPI_ISL_2357390, EPI_ISL_2357391, EPI_ISL_2357392, EPI_ISL_2357393, EPI_ISL_2357394, EPI_ISL_2357395, EPI_ISL_2357396, EPI_ISL_2357397, EPI_ISL_2357398, EPI_ISL_2357399, EPI_ISL_2357400, EPI_ISL_2357401, EPI_ISL_2357402, EPI_ISL_2357403, EPI_ISL_2357404, EPI_ISL_2357405, EPI_ISL_2357406, EPI_ISL_2357407, EPI_ISL_2357408, EPI_ISL_2357409, EPI_ISL_2357410, EPI_ISL_2357411, EPI_ISL_2357412, EPI_ISL_2357413, EPI_ISL_2357414, EPI_ISL_2357415, EPI_ISL_2357416, EPI_ISL_2357417, EPI_ISL_2357418, EPI_ISL_2357419, EPI_ISL_2357420, EPI_ISL_2357421, EPI_ISL_2357422, EPI_ISL_2357423, EPI_ISL_2357424, EPI_ISL_2357425, EPI_ISL_2357426, EPI_ISL_2357427, EPI_ISL_2357428, EPI_ISL_2357429, EPI_ISL_2357430, EPI_ISL_2357431, EPI_ISL_2357432, EPI_ISL_2357433, EPI_ISL_2357434, EPI_ISL_2357435, EPI_ISL_2357436, EPI_ISL_2357437, EPI_ISL_2357438, EPI_ISL_2357439, EPI_ISL_2357440, EPI_ISL_2357441, EPI_ISL_2357442, EPI_ISL_2357443, EPI_ISL_2357444, EPI_ISL_2357445, EPI_ISL_2357446, EPI_ISL_2357447, EPI_ISL_2357448, EPI_ISL_2357449, EPI_ISL_2357450, EPI_ISL_2357451, EPI_ISL_2357452, EPI_ISL_2357453, EPI_ISL_2357454, EPI_ISL_2357455, EPI_ISL_2357456, EPI_ISL_2357457, EPI_ISL_2357458, EPI_ISL_2357459, EPI_ISL_2357460, EPI_ISL_2357461, EPI_ISL_2357462, EPI_ISL_2357463, EPI_ISL_2357464, EPI_ISL_2357465, EPI_ISL_23574 |                                                                                       |                                                                                                                                                                                                 |                                                                                                 |                                                                                                             |

|                                                                                                                                                                                                                                                                                                                                                                                                                                                                                                                                                                                                                                                                                                                                                                                                                                                                                                                                                                                                                                                                                                                                                                                                                                                                                                                                                                                                                                                                                                                                                                                                                                                                                                                                                                                                                                                                                                                                                                                                                                                                                                                                                                                                                                                                                                                                                                                                                                                                                                                                                |                                                                           |                                                                                                 |                                                                                                                                                                                                              |
|------------------------------------------------------------------------------------------------------------------------------------------------------------------------------------------------------------------------------------------------------------------------------------------------------------------------------------------------------------------------------------------------------------------------------------------------------------------------------------------------------------------------------------------------------------------------------------------------------------------------------------------------------------------------------------------------------------------------------------------------------------------------------------------------------------------------------------------------------------------------------------------------------------------------------------------------------------------------------------------------------------------------------------------------------------------------------------------------------------------------------------------------------------------------------------------------------------------------------------------------------------------------------------------------------------------------------------------------------------------------------------------------------------------------------------------------------------------------------------------------------------------------------------------------------------------------------------------------------------------------------------------------------------------------------------------------------------------------------------------------------------------------------------------------------------------------------------------------------------------------------------------------------------------------------------------------------------------------------------------------------------------------------------------------------------------------------------------------------------------------------------------------------------------------------------------------------------------------------------------------------------------------------------------------------------------------------------------------------------------------------------------------------------------------------------------------------------------------------------------------------------------------------------------------|---------------------------------------------------------------------------|-------------------------------------------------------------------------------------------------|--------------------------------------------------------------------------------------------------------------------------------------------------------------------------------------------------------------|
| see above                                                                                                                                                                                                                                                                                                                                                                                                                                                                                                                                                                                                                                                                                                                                                                                                                                                                                                                                                                                                                                                                                                                                                                                                                                                                                                                                                                                                                                                                                                                                                                                                                                                                                                                                                                                                                                                                                                                                                                                                                                                                                                                                                                                                                                                                                                                                                                                                                                                                                                                                      | Osaka University Hospital                                                 | Genome Information Research Center, Research Institute for Microbial Diseases, Osaka University | Daisuke Motooka; Haruhiko Hirata; Hiroshi Ogura; Hiroya Oki; Hisatake Matsumoto; Kentaro Tanaka; Shota Nakamura; Takeshi Ebihara; Yasuhiro Kato; and Atsushi Kumanogoh                                       |
| EPI_ISL_2392147, EPI_ISL_2392148, EPI_ISL_2392149, EPI_ISL_2392150, EPI_ISL_2392151, EPI_ISL_2392152, EPI_ISL_2392153, EPI_ISL_2392154, EPI_ISL_2392155, EPI_ISL_2392156, EPI_ISL_2392157, EPI_ISL_2392158, EPI_ISL_2392159, EPI_ISL_2491330, EPI_ISL_2491331, EPI_ISL_2491332, EPI_ISL_2491333, EPI_ISL_2491334, EPI_ISL_2491335, EPI_ISL_2491336, EPI_ISL_2491337, EPI_ISL_2491338, EPI_ISL_2491339, EPI_ISL_2491340, EPI_ISL_2491341, EPI_ISL_2491342, EPI_ISL_2491343, EPI_ISL_2491344, EPI_ISL_2491345, EPI_ISL_2491346, EPI_ISL_2491347, EPI_ISL_2491348, EPI_ISL_2491349, EPI_ISL_2491350, EPI_ISL_2491351, EPI_ISL_2491352, EPI_ISL_2491353, EPI_ISL_2491354, EPI_ISL_2491355, EPI_ISL_2491356, EPI_ISL_2491357, EPI_ISL_2491358, EPI_ISL_2491359, EPI_ISL_2491360, EPI_ISL_2491361, EPI_ISL_2491362, EPI_ISL_2491363                                                                                                                                                                                                                                                                                                                                                                                                                                                                                                                                                                                                                                                                                                                                                                                                                                                                                                                                                                                                                                                                                                                                                                                                                                                                                                                                                                                                                                                                                                                                                                                                                                                                                                                  |                                                                           |                                                                                                 |                                                                                                                                                                                                              |
| see above                                                                                                                                                                                                                                                                                                                                                                                                                                                                                                                                                                                                                                                                                                                                                                                                                                                                                                                                                                                                                                                                                                                                                                                                                                                                                                                                                                                                                                                                                                                                                                                                                                                                                                                                                                                                                                                                                                                                                                                                                                                                                                                                                                                                                                                                                                                                                                                                                                                                                                                                      | Pathogen Genomics Center, National Institute of Infectious Diseases       | Pathogen Genomics Center, National Institute of Infectious Diseases                             | Kentaro Itokawa; Makoto Kuroda; Masanori Hashino; Rina Tanaka; Tsuyoshi Sekizuka                                                                                                                             |
| EPI_ISL_2447604, EPI_ISL_2447605, EPI_ISL_2447606, EPI_ISL_2447607, EPI_ISL_2447608, EPI_ISL_2447609, EPI_ISL_2447610, EPI_ISL_2447611, EPI_ISL_2447612, EPI_ISL_2447613, EPI_ISL_2447615, EPI_ISL_2447617, EPI_ISL_2447620, EPI_ISL_2447623, EPI_ISL_2447625, EPI_ISL_2447628, EPI_ISL_2447631, EPI_ISL_2447634, EPI_ISL_2447636, EPI_ISL_2447639, EPI_ISL_2447642, EPI_ISL_2447644, EPI_ISL_2447648, EPI_ISL_2447650, EPI_ISL_2447653, EPI_ISL_2447656, EPI_ISL_2447659, EPI_ISL_2447662, EPI_ISL_2447664, EPI_ISL_2447667, EPI_ISL_2447670, EPI_ISL_2447673, EPI_ISL_2447676, EPI_ISL_2447678, EPI_ISL_2447680, EPI_ISL_2447683, EPI_ISL_2447686, EPI_ISL_2447689, EPI_ISL_2447692, EPI_ISL_2447694, EPI_ISL_2447697, EPI_ISL_2447700, EPI_ISL_2447988, EPI_ISL_2621738, EPI_ISL_2621739, EPI_ISL_2621740, EPI_ISL_2621741, EPI_ISL_2621742, EPI_ISL_2621743, EPI_ISL_2621744, EPI_ISL_2621745, EPI_ISL_2621746, EPI_ISL_2621747, EPI_ISL_2621748, EPI_ISL_2621749, EPI_ISL_2621750, EPI_ISL_2621751, EPI_ISL_2621752, EPI_ISL_2621753, EPI_ISL_2621754, EPI_ISL_2621755, EPI_ISL_2621756, EPI_ISL_2621757, EPI_ISL_2621758, EPI_ISL_2621759, EPI_ISL_2621760, EPI_ISL_2621761, EPI_ISL_2621762, EPI_ISL_2621763, EPI_ISL_2621764, EPI_ISL_2621765, EPI_ISL_2621766, EPI_ISL_2621767, EPI_ISL_2621768, EPI_ISL_2621769, EPI_ISL_2621770, EPI_ISL_2621771, EPI_ISL_2621772, EPI_ISL_2621773, EPI_ISL_2621774, EPI_ISL_2621776, EPI_ISL_2621777, EPI_ISL_2621778, EPI_ISL_2621779, EPI_ISL_2621780, EPI_ISL_2621781, EPI_ISL_2621782, EPI_ISL_2674806, EPI_ISL_2674807, EPI_ISL_2674808, EPI_ISL_2674809, EPI_ISL_2674810, EPI_ISL_2674811                                                                                                                                                                                                                                                                                                                                                                                                                                                                                                                                                                                                                                                                                                                                                                                                                                                                                                    |                                                                           |                                                                                                 |                                                                                                                                                                                                              |
| see above                                                                                                                                                                                                                                                                                                                                                                                                                                                                                                                                                                                                                                                                                                                                                                                                                                                                                                                                                                                                                                                                                                                                                                                                                                                                                                                                                                                                                                                                                                                                                                                                                                                                                                                                                                                                                                                                                                                                                                                                                                                                                                                                                                                                                                                                                                                                                                                                                                                                                                                                      | SARS-CoV-2 testing team, National Institute of Infectious Diseases        | Pathogen Genomics Center, National Institute of Infectious Diseases                             | Hazuka Y Furihata; Hiromizu Takahashi; Kentaro Itokawa; Makoto Kuroda; Masanori Hashino; Masumichi Saito; Naomi Nojiri; Nozomu Hanaoka; Rina Tanaka; Sana Uchikoba; Tsuguto Fujimoto; Tsuyoshi Sekizuka      |
| EPI_ISL_2350403, EPI_ISL_2350404, EPI_ISL_2350405, EPI_ISL_2350406, EPI_ISL_2350407, EPI_ISL_2350408, EPI_ISL_2350409, EPI_ISL_2350410, EPI_ISL_2350411, EPI_ISL_2350412, EPI_ISL_2350413, EPI_ISL_2350414, EPI_ISL_2350415, EPI_ISL_2350416, EPI_ISL_2350417, EPI_ISL_2350418, EPI_ISL_2350419, EPI_ISL_2350420, EPI_ISL_2350421, EPI_ISL_2350422, EPI_ISL_2350423, EPI_ISL_2350424, EPI_ISL_2350425, EPI_ISL_2350426, EPI_ISL_2350427, EPI_ISL_2350428, EPI_ISL_2350429, EPI_ISL_2350430, EPI_ISL_2350431, EPI_ISL_2350432, EPI_ISL_2350433, EPI_ISL_2350434, EPI_ISL_2350435, EPI_ISL_2350436, EPI_ISL_2350437, EPI_ISL_2350438, EPI_ISL_2350439, EPI_ISL_2350440, EPI_ISL_2350441, EPI_ISL_2350442, EPI_ISL_2350443, EPI_ISL_2350444, EPI_ISL_2350445, EPI_ISL_2350446, EPI_ISL_2350447, EPI_ISL_2350448, EPI_ISL_2350449, EPI_ISL_2350450, EPI_ISL_2350451, EPI_ISL_2350452, EPI_ISL_2350453, EPI_ISL_2350455, EPI_ISL_2350456, EPI_ISL_2350457, EPI_ISL_2350458, EPI_ISL_2350459, EPI_ISL_2350460, EPI_ISL_2350461, EPI_ISL_2350462, EPI_ISL_2350463, EPI_ISL_2350464, EPI_ISL_2350465, EPI_ISL_2350466, EPI_ISL_2350467, EPI_ISL_2350468, EPI_ISL_2350469, EPI_ISL_2350470, EPI_ISL_2350471, EPI_ISL_2350472, EPI_ISL_2350473, EPI_ISL_2350474, EPI_ISL_2350475, EPI_ISL_2350476, EPI_ISL_2350477, EPI_ISL_2350478, EPI_ISL_2350479, EPI_ISL_2350480, EPI_ISL_2350481, EPI_ISL_2350482, EPI_ISL_2350483, EPI_ISL_2350484                                                                                                                                                                                                                                                                                                                                                                                                                                                                                                                                                                                                                                                                                                                                                                                                                                                                                                                                                                                                                                                                                                                |                                                                           |                                                                                                 |                                                                                                                                                                                                              |
| see above                                                                                                                                                                                                                                                                                                                                                                                                                                                                                                                                                                                                                                                                                                                                                                                                                                                                                                                                                                                                                                                                                                                                                                                                                                                                                                                                                                                                                                                                                                                                                                                                                                                                                                                                                                                                                                                                                                                                                                                                                                                                                                                                                                                                                                                                                                                                                                                                                                                                                                                                      | Saitama Prefectural Institute of Public Health                            | Saitama Prefectural Institute of Public Health                                                  | Eri Aonuma; Hayato Ehara; Kentaro Itokawa; Makoto Kuroda; Masanori Hashino; Rina Tanaka; Satoshi Daisaki; Tsuyoshi Sekizuka                                                                                  |
| EPI_ISL_2357899, EPI_ISL_2357900, EPI_ISL_2357901, EPI_ISL_2357902, EPI_ISL_2357903, EPI_ISL_2357904, EPI_ISL_2357905, EPI_ISL_2357906, EPI_ISL_2357907, EPI_ISL_2357908, EPI_ISL_2357909, EPI_ISL_2357910, EPI_ISL_2357911, EPI_ISL_2357912, EPI_ISL_2357913, EPI_ISL_2357914, EPI_ISL_2357915, EPI_ISL_2357916, EPI_ISL_2357917, EPI_ISL_2357918, EPI_ISL_2357919, EPI_ISL_2357920, EPI_ISL_2357921, EPI_ISL_2357922, EPI_ISL_2357923, EPI_ISL_2357924, EPI_ISL_2357925, EPI_ISL_2357926, EPI_ISL_2357927, EPI_ISL_2357928, EPI_ISL_2357929, EPI_ISL_2357930, EPI_ISL_2357931, EPI_ISL_2357932, EPI_ISL_2357933, EPI_ISL_2357934, EPI_ISL_2357935, EPI_ISL_2357936, EPI_ISL_2357937, EPI_ISL_2357938, EPI_ISL_2357939, EPI_ISL_2357940, EPI_ISL_2357941, EPI_ISL_2357942, EPI_ISL_2357943, EPI_ISL_2357944, EPI_ISL_2357945, EPI_ISL_2357946, EPI_ISL_2357947, EPI_ISL_2357949, EPI_ISL_2357950, EPI_ISL_2357951, EPI_ISL_2357952, EPI_ISL_2357953, EPI_ISL_2357954, EPI_ISL_2357955, EPI_ISL_2357956, EPI_ISL_2357957, EPI_ISL_2357958                                                                                                                                                                                                                                                                                                                                                                                                                                                                                                                                                                                                                                                                                                                                                                                                                                                                                                                                                                                                                                                                                                                                                                                                                                                                                                                                                                                                                                                                                                      |                                                                           |                                                                                                 |                                                                                                                                                                                                              |
| see above                                                                                                                                                                                                                                                                                                                                                                                                                                                                                                                                                                                                                                                                                                                                                                                                                                                                                                                                                                                                                                                                                                                                                                                                                                                                                                                                                                                                                                                                                                                                                                                                                                                                                                                                                                                                                                                                                                                                                                                                                                                                                                                                                                                                                                                                                                                                                                                                                                                                                                                                      | Sapporo City Institute of Public Health                                   | Sapporo City Institute of Public Health                                                         | Asami Ohnishi; Kentaro Itokawa; Makoto Kuroda; Masanori Hashino; Masayuki Kikuchi; Rie Shimazaki; Rina Tanaka; Tsuyoshi Sekizuka; Yusuke Oguchi                                                              |
| EPI_ISL_2405217, EPI_ISL_2405218, EPI_ISL_2405219, EPI_ISL_2405220, EPI_ISL_2405221, EPI_ISL_2405222, EPI_ISL_2405223, EPI_ISL_2405224, EPI_ISL_2405225, EPI_ISL_2405226, EPI_ISL_2405227, EPI_ISL_2405228, EPI_ISL_2405229, EPI_ISL_2405230, EPI_ISL_2405231, EPI_ISL_2405232, EPI_ISL_2405233, EPI_ISL_2405234, EPI_ISL_2405235, EPI_ISL_2405236                                                                                                                                                                                                                                                                                                                                                                                                                                                                                                                                                                                                                                                                                                                                                                                                                                                                                                                                                                                                                                                                                                                                                                                                                                                                                                                                                                                                                                                                                                                                                                                                                                                                                                                                                                                                                                                                                                                                                                                                                                                                                                                                                                                             |                                                                           |                                                                                                 |                                                                                                                                                                                                              |
| see above                                                                                                                                                                                                                                                                                                                                                                                                                                                                                                                                                                                                                                                                                                                                                                                                                                                                                                                                                                                                                                                                                                                                                                                                                                                                                                                                                                                                                                                                                                                                                                                                                                                                                                                                                                                                                                                                                                                                                                                                                                                                                                                                                                                                                                                                                                                                                                                                                                                                                                                                      | Shimane Prefectural Institute of Public Health and Environmental Science  | Shimane Prefectural Institute of Public Health and Environmental Science                        | Kentaro Itokawa; Makoto Kuroda; Masanori Hashino; Naoki Fujisawa; Rina Tanaka; Tsuyoshi Sekizuka                                                                                                             |
| EPI_ISL_2551582                                                                                                                                                                                                                                                                                                                                                                                                                                                                                                                                                                                                                                                                                                                                                                                                                                                                                                                                                                                                                                                                                                                                                                                                                                                                                                                                                                                                                                                                                                                                                                                                                                                                                                                                                                                                                                                                                                                                                                                                                                                                                                                                                                                                                                                                                                                                                                                                                                                                                                                                | Tochigi Prefectural Institute of Environment and Health                   | Genome Analysis Center, Kamma Memorial Hospital                                                 | Fuminori Mizukoshi; Hanako Yazawa; Hiroshi Kamma; Jun Ishii; Kaori Watanabe; Michiaki Masuda; Satoko Soma; Takuya Yazawa; Yoshiko Hitomi                                                                     |
| EPI_ISL_2438804, EPI_ISL_2438805, EPI_ISL_2438806, EPI_ISL_2438807, EPI_ISL_2438808, EPI_ISL_2438809, EPI_ISL_2438810, EPI_ISL_2438811, EPI_ISL_2438812, EPI_ISL_2438813, EPI_ISL_2438814, EPI_ISL_2438815, EPI_ISL_2438816, EPI_ISL_2438817, EPI_ISL_2438818, EPI_ISL_2438819, EPI_ISL_2438820, EPI_ISL_2438821, EPI_ISL_2438822, EPI_ISL_2438823, EPI_ISL_2438824, EPI_ISL_2438825, EPI_ISL_2438826, EPI_ISL_2438827, EPI_ISL_2438828, EPI_ISL_2438829, EPI_ISL_2438830, EPI_ISL_2438831, EPI_ISL_2438832, EPI_ISL_2438833, EPI_ISL_2438834, EPI_ISL_2438835, EPI_ISL_2438836, EPI_ISL_2438837, EPI_ISL_2438838, EPI_ISL_2438839, EPI_ISL_2438840, EPI_ISL_2438841, EPI_ISL_2438842, EPI_ISL_2438843, EPI_ISL_2438844, EPI_ISL_2438845, EPI_ISL_2438846, EPI_ISL_2438847, EPI_ISL_2438848, EPI_ISL_2438849, EPI_ISL_2438850, EPI_ISL_2438851, EPI_ISL_2438852, EPI_ISL_2438853, EPI_ISL_2461202, EPI_ISL_2461503, EPI_ISL_2461504, EPI_ISL_2461505, EPI_ISL_2461506, EPI_ISL_2461507, EPI_ISL_2461508, EPI_ISL_2462377, EPI_ISL_2462378, EPI_ISL_2462379, EPI_ISL_2462380, EPI_ISL_2462381, EPI_ISL_2462382, EPI_ISL_2462383, EPI_ISL_2462384, EPI_ISL_2462385, EPI_ISL_2462386, EPI_ISL_2462387, EPI_ISL_2462388, EPI_ISL_2462389, EPI_ISL_2462390, EPI_ISL_2462391, EPI_ISL_2462392, EPI_ISL_2462393, EPI_ISL_2462394, EPI_ISL_2462395, EPI_ISL_2462396, EPI_ISL_2462397, EPI_ISL_2462398, EPI_ISL_2462399, EPI_ISL_2462400, EPI_ISL_2562046, EPI_ISL_2562047, EPI_ISL_2562048, EPI_ISL_2562049, EPI_ISL_2562050, EPI_ISL_2562051, EPI_ISL_2562052, EPI_ISL_2562053, EPI_ISL_2562054, EPI_ISL_2562055, EPI_ISL_2562056, EPI_ISL_2562057, EPI_ISL_2562058, EPI_ISL_2651240, EPI_ISL_2651241, EPI_ISL_2651242, EPI_ISL_2651243, EPI_ISL_2651244, EPI_ISL_2651245, EPI_ISL_2651246, EPI_ISL_2651247, EPI_ISL_2651248, EPI_ISL_2651249, EPI_ISL_2709568, EPI_ISL_2709569, EPI_ISL_2709570, EPI_ISL_2709571, EPI_ISL_2709572, EPI_ISL_2709573, EPI_ISL_2709574, EPI_ISL_2709575, EPI_ISL_2709576, EPI_ISL_2709577, EPI_ISL_2709578, EPI_ISL_2709579, EPI_ISL_2709580, EPI_ISL_2709581, EPI_ISL_2709582, EPI_ISL_2709583, EPI_ISL_2709584, EPI_ISL_2709585, EPI_ISL_2709586, EPI_ISL_2709587, EPI_ISL_2709588, EPI_ISL_2709589, EPI_ISL_2709590, EPI_ISL_2709591, EPI_ISL_2709592, EPI_ISL_2709593, EPI_ISL_2709594, EPI_ISL_2709595, EPI_ISL_2709596, EPI_ISL_2709597, EPI_ISL_2709598, EPI_ISL_2709599, EPI_ISL_2709600, EPI_ISL_2709601, EPI_ISL_2709602, EPI_ISL_2723565, EPI_ISL_2723566, EPI_ISL_2723567, EPI_ISL_2723568, EPI_ISL_2723569 |                                                                           |                                                                                                 |                                                                                                                                                                                                              |
| see above                                                                                                                                                                                                                                                                                                                                                                                                                                                                                                                                                                                                                                                                                                                                                                                                                                                                                                                                                                                                                                                                                                                                                                                                                                                                                                                                                                                                                                                                                                                                                                                                                                                                                                                                                                                                                                                                                                                                                                                                                                                                                                                                                                                                                                                                                                                                                                                                                                                                                                                                      | Tokyo Metropolitan Institute of Public Health                             | Tokyo Metropolitan Institute of Public Health                                                   | Akane Negishi; Hirofumi Miyake; Hiroshi Koike; Jun Suzuki; Kenji Sadamasu; Kenshirou Kuroki; Mami Nagashima; Masaki Hayashi; Maya Isogai; Takako Yamazaki; Takushi Fujiwara                                  |
| EPI_ISL_2714903, EPI_ISL_2714904, EPI_ISL_2714905, EPI_ISL_2714906, EPI_ISL_2714907, EPI_ISL_2714908, EPI_ISL_2714909, EPI_ISL_2714910, EPI_ISL_2714911, EPI_ISL_2714912, EPI_ISL_2714913, EPI_ISL_2714914, EPI_ISL_2714915, EPI_ISL_2714916, EPI_ISL_2714917                                                                                                                                                                                                                                                                                                                                                                                                                                                                                                                                                                                                                                                                                                                                                                                                                                                                                                                                                                                                                                                                                                                                                                                                                                                                                                                                                                                                                                                                                                                                                                                                                                                                                                                                                                                                                                                                                                                                                                                                                                                                                                                                                                                                                                                                                  |                                                                           |                                                                                                 |                                                                                                                                                                                                              |
| see above                                                                                                                                                                                                                                                                                                                                                                                                                                                                                                                                                                                                                                                                                                                                                                                                                                                                                                                                                                                                                                                                                                                                                                                                                                                                                                                                                                                                                                                                                                                                                                                                                                                                                                                                                                                                                                                                                                                                                                                                                                                                                                                                                                                                                                                                                                                                                                                                                                                                                                                                      | Tokyo Metropolitan Institute of Public Health, Department of Microbiology | Tokyo Metropolitan Institute of Public Health, Department of Microbiology                       | Asakura, H.; Fujiwara, T.; J. and Sadamasu, K.; Kumagai, R.; Miyake, H.; Nagashima, M.; Suzuki; Yaita, Y.; Yoshida, I.                                                                                       |
| EPI_ISL_2405201, EPI_ISL_2405237, EPI_ISL_2405360, EPI_ISL_2405361, EPI_ISL_2405362, EPI_ISL_2405590, EPI_ISL_2406026                                                                                                                                                                                                                                                                                                                                                                                                                                                                                                                                                                                                                                                                                                                                                                                                                                                                                                                                                                                                                                                                                                                                                                                                                                                                                                                                                                                                                                                                                                                                                                                                                                                                                                                                                                                                                                                                                                                                                                                                                                                                                                                                                                                                                                                                                                                                                                                                                          |                                                                           |                                                                                                 |                                                                                                                                                                                                              |
| see above                                                                                                                                                                                                                                                                                                                                                                                                                                                                                                                                                                                                                                                                                                                                                                                                                                                                                                                                                                                                                                                                                                                                                                                                                                                                                                                                                                                                                                                                                                                                                                                                                                                                                                                                                                                                                                                                                                                                                                                                                                                                                                                                                                                                                                                                                                                                                                                                                                                                                                                                      | Toyama Institute of Health                                                | Toyama Institute of Health                                                                      | Emiko Igarashi; Hideki Tani; Kazunori Oishi; Kentaro Itokawa; Makoto Kuroda; Masae Itamochi; Masanori Hashino; Noriko Inasaki; Rina Tanaka; Shunsuke Yazawa; Sumiyo Hasegawa; Tsuyoshi Sekizuka; Yumiko Saga |

Authors are sorted alphabetically.

[illegible]

[illegible]

[illegible]









1, 2, 3, 4, 5, 6, 7, 8, 9, 10, 11, 12, 13, 14, 15, 16, 17, 18, 19, 20, 21, 22, 23, 24, 25, 26, 27, 28, 29, 30, 31, 32, 33, 34, 35, 36, 37, 38, 39, 40, 41, 42, 43, 44, 45, 46, 47, 48, 49, 50, 51, 52, 53, 54, 55, 56, 57, 58, 59, 60, 61, 62, 63, 64, 65, 66, 67, 68, 69, 70, 71, 72, 73, 74, 75, 76, 77, 78, 79, 80, 81, 82, 83, 84, 85, 86, 87, 88, 89, 90, 91, 92, 93, 94, 95, 96, 97, 98, 99, 100, 101, 102, 103, 104, 105, 106, 107, 108, 109, 110, 111, 112, 113, 114, 115, 116, 117, 118, 119, 120, 121, 122, 123, 124, 125, 126, 127, 128, 129, 130, 131, 132, 133, 134, 135, 136, 137, 138, 139, 140, 141, 142, 143, 144, 145, 146, 147, 148, 149, 150, 151, 152, 153, 154, 155, 156, 157, 158, 159, 160, 161, 162, 163, 164, 165, 166, 167, 168, 169, 170, 171, 172, 173, 174, 175, 176, 177, 178, 179, 180, 181, 182, 183, 184, 185, 186, 187, 188, 189, 190, 191, 192, 193, 194, 195, 196, 197, 198, 199, 200, 201, 202, 203, 204, 205, 206, 207, 208, 209, 210, 211, 212, 213, 214, 215, 216, 217, 218, 219, 220, 221, 222, 223, 224, 225, 226, 227, 228, 229, 230, 231, 232, 233, 234, 235, 236, 237, 238, 239, 240, 241, 242, 243, 244, 245, 246, 247, 248, 249, 250, 251, 252, 253, 254, 255, 256, 257, 258, 259, 260, 261, 262, 263, 264, 265, 266, 267, 268, 269, 270, 271, 272, 273, 274, 275, 276, 277, 278, 279, 280, 281, 282, 283, 284, 285, 286, 287, 288, 289, 290, 291, 292, 293, 294, 295, 296, 297, 298, 299, 300, 301, 302, 303, 304, 305, 306, 307, 308, 309, 310, 311, 312, 313, 314, 315, 316, 317, 318, 319, 320, 321, 322, 323, 324, 325, 326, 327, 328, 329, 330, 331, 332, 333, 334, 335, 336, 337, 338, 339, 340, 341, 342, 343, 344, 345, 346, 347, 348, 349, 350, 351, 352, 353, 354, 355, 356, 357, 358, 359, 360, 361, 362, 363, 364, 365, 366, 367, 368, 369, 370, 371, 372, 373, 374, 375, 376, 377, 378, 379, 380, 381, 382, 383, 384, 385, 386, 387, 388, 389, 390, 391, 392, 393, 394, 395, 396, 397, 398, 399, 400, 401, 402, 403, 404, 405, 406, 407, 408, 409, 410, 411, 412, 413, 414, 415, 416, 417, 418, 419, 420, 421, 422, 423, 424, 425, 426, 427, 428, 429, 430, 431, 432, 433, 434, 435, 436, 437, 438, 439, 440, 441, 442, 443, 444, 445, 446, 447, 448, 449, 450, 451, 452, 453, 454, 455, 456, 457, 458, 459, 460, 461, 462, 463, 464, 465, 466, 467, 468, 469, 470, 471, 472, 473, 474, 475, 476, 477, 478, 479, 480, 481, 482, 483, 484, 485, 486, 487, 488, 489, 490, 491, 492, 493, 494, 495, 496, 497, 498, 499, 500, 501, 502, 503, 504, 505, 506, 507, 508, 509, 510, 511, 512, 513, 514, 515, 516, 517, 518, 519, 520, 521, 522, 523, 524, 525, 526, 527, 528, 529, 530, 531, 532, 533, 534, 535, 536, 537, 538, 539, 540, 541, 542, 543, 544, 545, 546, 547, 548, 549, 550, 551, 552, 553, 554, 555, 556, 557, 558, 559, 560, 561, 562, 563, 564, 565, 566, 567, 568, 569, 570, 571, 572, 573, 574, 575, 576, 577, 578, 579, 580, 581, 582, 583, 584, 585, 586, 587, 588, 589, 590, 591, 592, 593, 594, 595, 596, 597, 598, 599, 600, 601, 602, 603, 604, 605, 606, 607, 608, 609, 610, 611, 612, 613, 614, 615, 616, 617, 618, 619, 620, 621, 622, 623, 624, 625, 626, 627, 628, 629, 630, 631, 632, 633, 634, 635, 636, 637, 638, 639, 640, 641, 642, 643, 644, 645, 646, 647, 648, 649, 650, 651, 652, 653, 654, 655, 656, 657, 658, 659, 660, 661, 662, 663, 664, 665, 666, 667, 668, 669, 670, 671, 672, 673, 674, 675, 676, 677, 678, 679, 680, 681, 682, 683, 684, 685, 686, 687, 688, 689, 690, 691, 692, 693, 694, 695, 696, 697, 698, 699, 700, 701, 702, 703, 704, 705, 706, 707, 708, 709, 710, 711, 712, 713, 714, 715, 716, 717, 718, 719, 720, 721, 722, 723, 724, 725, 726, 727, 728, 729, 730, 731, 732, 733, 734, 735, 736, 737, 738, 739, 740, 741, 742, 743, 744, 745, 746, 747, 748, 749, 750, 751, 752, 753, 754, 755, 756, 757, 758, 759, 760, 761, 762, 763, 764, 765, 766, 767, 768, 769, 770, 771, 772, 773, 774, 775, 776, 777, 778, 779, 780, 781, 782, 783, 784, 785, 786, 787, 788, 789, 790, 791, 792, 793, 794, 795, 796, 797, 798, 799, 800, 801, 802, 803, 804, 805, 806, 807, 808, 809, 810, 811, 812, 813, 814, 815, 816, 817, 818, 819, 820, 821, 822, 823, 824, 825, 826, 827, 828, 829, 830, 831, 832, 833, 834, 835, 836, 837, 838, 839, 840, 84



EPI\_ISL\_1929901, EPI\_ISL\_1929903,  
EPI\_ISL\_1929904, EPI\_ISL\_1930488

Yamagata Prefectural Institute of Public Health

Institute of Infectious Diseases  
Pathogen Genomics Center, National  
Institute of Infectious Diseases

Tsuguto Fujimoto; Tsuyoshi Sekizuka  
Kentaro Itokawa; Makoto Kuroda; Masanori Hashino; Rina Tanaka; Tsuyoshi Sekizuka



|                                                                                                                                                                                                                                                                                                                                                                                                                                                                                                                                                                                                                                                                                                                                                                                                                                                                                                                                                                                                                                                                                                                                                                                                                                                                                                                                                                                                                                                                                                                                                                                                                                                                                                                                                                                                                                                                                                                                                                                                                                                                                                                                                                                                                                                                                                                   |                                               |                                               |                                                                                                                                                                                                |
|-------------------------------------------------------------------------------------------------------------------------------------------------------------------------------------------------------------------------------------------------------------------------------------------------------------------------------------------------------------------------------------------------------------------------------------------------------------------------------------------------------------------------------------------------------------------------------------------------------------------------------------------------------------------------------------------------------------------------------------------------------------------------------------------------------------------------------------------------------------------------------------------------------------------------------------------------------------------------------------------------------------------------------------------------------------------------------------------------------------------------------------------------------------------------------------------------------------------------------------------------------------------------------------------------------------------------------------------------------------------------------------------------------------------------------------------------------------------------------------------------------------------------------------------------------------------------------------------------------------------------------------------------------------------------------------------------------------------------------------------------------------------------------------------------------------------------------------------------------------------------------------------------------------------------------------------------------------------------------------------------------------------------------------------------------------------------------------------------------------------------------------------------------------------------------------------------------------------------------------------------------------------------------------------------------------------|-----------------------------------------------|-----------------------------------------------|------------------------------------------------------------------------------------------------------------------------------------------------------------------------------------------------|
| see above                                                                                                                                                                                                                                                                                                                                                                                                                                                                                                                                                                                                                                                                                                                                                                                                                                                                                                                                                                                                                                                                                                                                                                                                                                                                                                                                                                                                                                                                                                                                                                                                                                                                                                                                                                                                                                                                                                                                                                                                                                                                                                                                                                                                                                                                                                         | Shizuoka Institute of Environment and Hygiene | Japan COVID-19 Open Data Consortium           | Atsushi Toyoda; Hiromi Nagaoka; Hiroshi Mori; Ituro Inoue; Katsuyuki Ishigami; Ken Kurokawa; Masanori Arita; Satomi Asano; Shigeki Mitsunaga; Takatomo Fujisawa; Yasuhiro Tanizawa; Yono Arita |
| EPI_ISL_4298661, EPI_ISL_4298662, EPI_ISL_4298663, EPI_ISL_4298664, EPI_ISL_4298665, EPI_ISL_4298666, EPI_ISL_4298667, EPI_ISL_4298668, EPI_ISL_4298669, EPI_ISL_4298670, EPI_ISL_4298671, EPI_ISL_4298672, EPI_ISL_4298673, EPI_ISL_4298674, EPI_ISL_4298675, EPI_ISL_4298676, EPI_ISL_4298677, EPI_ISL_4298678, EPI_ISL_4298679, EPI_ISL_4298680, EPI_ISL_4315521, EPI_ISL_4315532                                                                                                                                                                                                                                                                                                                                                                                                                                                                                                                                                                                                                                                                                                                                                                                                                                                                                                                                                                                                                                                                                                                                                                                                                                                                                                                                                                                                                                                                                                                                                                                                                                                                                                                                                                                                                                                                                                                              | see above                                     | The University of Tokyo Hospital              | Kyoji Moriya; Sohei Harada; Yuki Ohama                                                                                                                                                         |
| EPI_ISL_3979363, EPI_ISL_3979364, EPI_ISL_3979365, EPI_ISL_3979366, EPI_ISL_3979367, EPI_ISL_3979368, EPI_ISL_3979369, EPI_ISL_3979370, EPI_ISL_3979371, EPI_ISL_3979372, EPI_ISL_3979373, EPI_ISL_3979374, EPI_ISL_3979375, EPI_ISL_3979376, EPI_ISL_3979377, EPI_ISL_3979378, EPI_ISL_3979379, EPI_ISL_3979380, EPI_ISL_3979381, EPI_ISL_3979382, EPI_ISL_3979383, EPI_ISL_3979384, EPI_ISL_3979385, EPI_ISL_3979386, EPI_ISL_3987493, EPI_ISL_3987494, EPI_ISL_4029568, EPI_ISL_4029569, EPI_ISL_4029570, EPI_ISL_4029571, EPI_ISL_4029572, EPI_ISL_4029573, EPI_ISL_4029574, EPI_ISL_4029575, EPI_ISL_4029576, EPI_ISL_4029577, EPI_ISL_4029578, EPI_ISL_4029579, EPI_ISL_4029580, EPI_ISL_4029581, EPI_ISL_4029582, EPI_ISL_4029583, EPI_ISL_4029584, EPI_ISL_4029585, EPI_ISL_4029586, EPI_ISL_4029587, EPI_ISL_4029588, EPI_ISL_4029589, EPI_ISL_4029590, EPI_ISL_4029591, EPI_ISL_4029592, EPI_ISL_4063071, EPI_ISL_4063072, EPI_ISL_4063073, EPI_ISL_4063074, EPI_ISL_4063075, EPI_ISL_4063076, EPI_ISL_4063077, EPI_ISL_4263095, EPI_ISL_4263096, EPI_ISL_4263097, EPI_ISL_4263098, EPI_ISL_4263099, EPI_ISL_4263100, EPI_ISL_4263101, EPI_ISL_4263102, EPI_ISL_4263103, EPI_ISL_4414863, EPI_ISL_4414864, EPI_ISL_4414865, EPI_ISL_4414866, EPI_ISL_4414867, EPI_ISL_4414868, EPI_ISL_4414869, EPI_ISL_4414870, EPI_ISL_4414871, EPI_ISL_4414872, EPI_ISL_4414873, EPI_ISL_4414874, EPI_ISL_4414875, EPI_ISL_4414876, EPI_ISL_4414877, EPI_ISL_4414878, EPI_ISL_4414879, EPI_ISL_4414880, EPI_ISL_4414881, EPI_ISL_4414882, EPI_ISL_4414883, EPI_ISL_4414884, EPI_ISL_4414885, EPI_ISL_4473133, EPI_ISL_4473134, EPI_ISL_4473135, EPI_ISL_4473136, EPI_ISL_4473137, EPI_ISL_4473138, EPI_ISL_4473139, EPI_ISL_4473140, EPI_ISL_4473141, EPI_ISL_4473142, EPI_ISL_4473143, EPI_ISL_4473144, EPI_ISL_4473145, EPI_ISL_4473146, EPI_ISL_4473147, EPI_ISL_4473148, EPI_ISL_4496707, EPI_ISL_4496708, EPI_ISL_4496709, EPI_ISL_4496710, EPI_ISL_4496711, EPI_ISL_4496712, EPI_ISL_4496713, EPI_ISL_4496714, EPI_ISL_4496715, EPI_ISL_4496716, EPI_ISL_4496717, EPI_ISL_4496718, EPI_ISL_4496719, EPI_ISL_4496720, EPI_ISL_4496721, EPI_ISL_4496722, EPI_ISL_4496723, EPI_ISL_4496724, EPI_ISL_4496725, EPI_ISL_4496726, EPI_ISL_4496727, EPI_ISL_4496728, EPI_ISL_4496729, EPI_ISL_4496730, EPI_ISL_4496731 | see above                                     | Tokyo Metropolitan Institute of Public Health | Akane Negishi; Arisa Amano; Hirofumi Miyake; Jun Suzuki; Kenji Sadamasu; Kenshirou Kuroki; Mami Nagashima; Masaki Hayashi; Maya Isogai; Takako Yamazaki; Takushi Fujiwara                      |
| EPI_ISL_3940064, EPI_ISL_3940065, EPI_ISL_3941729, EPI_ISL_3941748, EPI_ISL_3941894, EPI_ISL_3941895, EPI_ISL_3941896, EPI_ISL_3941897, EPI_ISL_3941898, EPI_ISL_3941899, EPI_ISL_3941900, EPI_ISL_3941901, EPI_ISL_3941902, EPI_ISL_3941903, EPI_ISL_3941904, EPI_ISL_3941905, EPI_ISL_3941906, EPI_ISL_3941907, EPI_ISL_3941908, EPI_ISL_3942332, EPI_ISL_3942333, EPI_ISL_3942334, EPI_ISL_3942335, EPI_ISL_3942336, EPI_ISL_3942337, EPI_ISL_3942338, EPI_ISL_3942339, EPI_ISL_3942340, EPI_ISL_3942341, EPI_ISL_3942342, EPI_ISL_3942343, EPI_ISL_3942344, EPI_ISL_3942345, EPI_ISL_3942346, EPI_ISL_3942347, EPI_ISL_3942348, EPI_ISL_3942349, EPI_ISL_3942350, EPI_ISL_3942351, EPI_ISL_3942352, EPI_ISL_3942353, EPI_ISL_3942354, EPI_ISL_4001657, EPI_ISL_4001658, EPI_ISL_4001659, EPI_ISL_4001660, EPI_ISL_4001661, EPI_ISL_4001662, EPI_ISL_4001663, EPI_ISL_4001664, EPI_ISL_4001665, EPI_ISL_4001666, EPI_ISL_4001667, EPI_ISL_4001668, EPI_ISL_4001669, EPI_ISL_4001670, EPI_ISL_4001671, EPI_ISL_4001672, EPI_ISL_4001673, EPI_ISL_4001674, EPI_ISL_4001675, EPI_ISL_4078211, EPI_ISL_4078923, EPI_ISL_4078924, EPI_ISL_4078925, EPI_ISL_4078926, EPI_ISL_4078927, EPI_ISL_4078928, EPI_ISL_4079169, EPI_ISL_4079183, EPI_ISL_4169304, EPI_ISL_4295198, EPI_ISL_4295200, EPI_ISL_4295203, EPI_ISL_4295205, EPI_ISL_4295207, EPI_ISL_4295209, EPI_ISL_4295212, EPI_ISL_4295214, EPI_ISL_4295216, EPI_ISL_4295218, EPI_ISL_4295220, EPI_ISL_4295222, EPI_ISL_4295224, EPI_ISL_4295227, EPI_ISL_4295229, EPI_ISL_4295231, EPI_ISL_4295233                                                                                                                                                                                                                                                                                                                                                                                                                                                                                                                                                                                                                                                                                                                                                            | see above                                     | US Air Force School of Aerospace Medicine     | Amanda Javorina; Anthony Fries; Carol Garrett; Clarise Starr; Deanna Muehleman; Elizabeth Macias; Jennifer Meyer; Kelsey Lanter; Sarah Purves; William Gruner                                  |
| EPI_ISL_4251907, EPI_ISL_4251908, EPI_ISL_4251909, EPI_ISL_4251910, EPI_ISL_4251911, EPI_ISL_4251912, EPI_ISL_4251913, EPI_ISL_4251914, EPI_ISL_4251915, EPI_ISL_4251916, EPI_ISL_4251917, EPI_ISL_4251918, EPI_ISL_4251919, EPI_ISL_4251920, EPI_ISL_4251921, EPI_ISL_4251922, EPI_ISL_4251923, EPI_ISL_4251924, EPI_ISL_4251925, EPI_ISL_4251926                                                                                                                                                                                                                                                                                                                                                                                                                                                                                                                                                                                                                                                                                                                                                                                                                                                                                                                                                                                                                                                                                                                                                                                                                                                                                                                                                                                                                                                                                                                                                                                                                                                                                                                                                                                                                                                                                                                                                                | see above                                     | University of Tokyo Hospital                  | Kyoji Moriya; Sohei Harada; Yuki Ohama                                                                                                                                                         |











|                                                                                                                                                                                                                                                                                                                                                                                                                                                                                                                                                                                                                                                                                                                                                                                                                                                                                                                                                                                                                                                                                                                                |                                               |                                                                          |                                                                                                                                                              |                                                                                                                                                                                                              |
|--------------------------------------------------------------------------------------------------------------------------------------------------------------------------------------------------------------------------------------------------------------------------------------------------------------------------------------------------------------------------------------------------------------------------------------------------------------------------------------------------------------------------------------------------------------------------------------------------------------------------------------------------------------------------------------------------------------------------------------------------------------------------------------------------------------------------------------------------------------------------------------------------------------------------------------------------------------------------------------------------------------------------------------------------------------------------------------------------------------------------------|-----------------------------------------------|--------------------------------------------------------------------------|--------------------------------------------------------------------------------------------------------------------------------------------------------------|--------------------------------------------------------------------------------------------------------------------------------------------------------------------------------------------------------------|
| EPI_ISL_3332722, EPI_ISL_3332723, EPI_ISL_3332724, EPI_ISL_3332725, EPI_ISL_3332726, EPI_ISL_3332727, EPI_ISL_3332728, EPI_ISL_3332729, EPI_ISL_3332730, EPI_ISL_3332731, EPI_ISL_3332732, EPI_ISL_3332733, EPI_ISL_3332734, EPI_ISL_3332735, EPI_ISL_3332736, EPI_ISL_3332737, EPI_ISL_3332738, EPI_ISL_3332739, EPI_ISL_3332740, EPI_ISL_3332741, EPI_ISL_3332742                                                                                                                                                                                                                                                                                                                                                                                                                                                                                                                                                                                                                                                                                                                                                            |                                               |                                                                          |                                                                                                                                                              |                                                                                                                                                                                                              |
| see above                                                                                                                                                                                                                                                                                                                                                                                                                                                                                                                                                                                                                                                                                                                                                                                                                                                                                                                                                                                                                                                                                                                      | Tokyo Medical and Dental University           | Tokyo Medical and Dental University                                      | Akinori Kimura; Hiroaki Takeuchi; Kousuke Tanimoto; Yoko Nukui; Yukie Tanaka                                                                                 |                                                                                                                                                                                                              |
| EPI_ISL_3315838, EPI_ISL_3315839, EPI_ISL_3315840, EPI_ISL_3315841, EPI_ISL_3315842, EPI_ISL_3315843, EPI_ISL_3315844, EPI_ISL_3315845, EPI_ISL_3315846, EPI_ISL_3315847, EPI_ISL_3315848, EPI_ISL_3315849, EPI_ISL_3315850, EPI_ISL_3374471, EPI_ISL_3374472, EPI_ISL_3374473, EPI_ISL_3374474, EPI_ISL_3374475, EPI_ISL_3374476, EPI_ISL_3374477, EPI_ISL_3374478, EPI_ISL_3374479, EPI_ISL_3374480, EPI_ISL_3374481, EPI_ISL_3374482, EPI_ISL_3374483, EPI_ISL_3374485, EPI_ISL_3374486, EPI_ISL_3374487, EPI_ISL_3374488, EPI_ISL_3374489, EPI_ISL_3374490, EPI_ISL_3374491, EPI_ISL_3374492, EPI_ISL_3374493, EPI_ISL_3374494, EPI_ISL_3374495, EPI_ISL_3374496, EPI_ISL_3374497, EPI_ISL_3374498, EPI_ISL_3374499, EPI_ISL_3374500, EPI_ISL_3374501, EPI_ISL_3374502, EPI_ISL_3374503, EPI_ISL_3374504, EPI_ISL_3374505, EPI_ISL_3374506, EPI_ISL_3374507, EPI_ISL_3374508, EPI_ISL_3374509, EPI_ISL_3374510, EPI_ISL_3374511, EPI_ISL_3374512, EPI_ISL_3374513, EPI_ISL_3374514, EPI_ISL_3374515, EPI_ISL_3374516, EPI_ISL_3374517, EPI_ISL_3374518, EPI_ISL_3374519, EPI_ISL_3374520, EPI_ISL_3374521, EPI_ISL_3374522 |                                               |                                                                          |                                                                                                                                                              |                                                                                                                                                                                                              |
| see above                                                                                                                                                                                                                                                                                                                                                                                                                                                                                                                                                                                                                                                                                                                                                                                                                                                                                                                                                                                                                                                                                                                      | Tokyo Metropolitan Institute of Public Health | Tokyo Metropolitan Institute of Public Health                            | Akane Negishi; Hirofumi Miyake; Jun Suzuki; Kenji Sadamasu; Kenshirou Kuroki; Mami Nagashima; Masaki Hayashi; Maya Isogai; Takako Yamazaki; Takushi Fujiwara |                                                                                                                                                                                                              |
| EPI_ISL_3191323, EPI_ISL_3191324, EPI_ISL_3191325, EPI_ISL_3191326, EPI_ISL_3191327, EPI_ISL_3191328, EPI_ISL_3191329, EPI_ISL_3191330, EPI_ISL_3191331, EPI_ISL_3191332, EPI_ISL_3191333, EPI_ISL_3191334, EPI_ISL_3191335, EPI_ISL_3191336, EPI_ISL_3191763, EPI_ISL_3191764, EPI_ISL_3191765, EPI_ISL_3191766, EPI_ISL_3191767, EPI_ISL_3191768, EPI_ISL_3191769                                                                                                                                                                                                                                                                                                                                                                                                                                                                                                                                                                                                                                                                                                                                                            | see above                                     | Tottori Prefectural Institute of Public Health and Environmental Science | Tottori Prefectural Institute of Public Health and Environmental Science                                                                                     | Eiji Okuda; Kentaro Itokawa; Makoto Kuroda; Masanori Hashino; Rei Ootomo; Rina Tanaka; Tsuyoshi Sekizuka; Yutaka Ueda                                                                                        |
| EPI_ISL_3191063, EPI_ISL_3191384, EPI_ISL_3191385, EPI_ISL_3191386, EPI_ISL_3191387, EPI_ISL_3191388, EPI_ISL_3191389, EPI_ISL_3191390, EPI_ISL_3191391, EPI_ISL_3191392, EPI_ISL_3191393, EPI_ISL_3191394, EPI_ISL_3191395, EPI_ISL_3191396, EPI_ISL_3191397, EPI_ISL_3191398, EPI_ISL_3191399, EPI_ISL_3191400, EPI_ISL_3191670, EPI_ISL_3191689                                                                                                                                                                                                                                                                                                                                                                                                                                                                                                                                                                                                                                                                                                                                                                             | see above                                     | Toyama Institute of Health                                               | Toyama Institute of Health                                                                                                                                   | Emiko Igarashi; Hideki Tani; Kazunori Oishi; Kentaro Itokawa; Makoto Kuroda; Masae Itamochi; Masanori Hashino; Noriko Inasaki; Rina Tanaka; Shunsuke Yazawa; Sumiyo Hasegawa; Tsuyoshi Sekizuka; Yumiko Saga |























|                                                                                                                                                                                                                                                                                                                                                                                                                                                                                                                                                                                                                                |                                                              |                                                                                         |                                                                                  |
|--------------------------------------------------------------------------------------------------------------------------------------------------------------------------------------------------------------------------------------------------------------------------------------------------------------------------------------------------------------------------------------------------------------------------------------------------------------------------------------------------------------------------------------------------------------------------------------------------------------------------------|--------------------------------------------------------------|-----------------------------------------------------------------------------------------|----------------------------------------------------------------------------------|
| EPI_ISL_862863, EPI_ISL_862864, EPI_ISL_862865,<br>EPI_ISL_862882, EPI_ISL_862883, EPI_ISL_862884                                                                                                                                                                                                                                                                                                                                                                                                                                                                                                                              | University Hospital Kyoto Prefectural University of Medicine | Diseases<br>Fujita health University, School of Medicine, Department of<br>Microbiology | Masahiro suzuki; Yohei Doi                                                       |
| EPI_ISL_893020, EPI_ISL_893021, EPI_ISL_893022, EPI_ISL_893023, EPI_ISL_893024, EPI_ISL_893025, EPI_ISL_893026, EPI_ISL_893027, EPI_ISL_893028, EPI_ISL_893029, EPI_ISL_893030, EPI_ISL_893031, EPI_ISL_893032, EPI_ISL_893033, EPI_ISL_893034, EPI_ISL_893035, EPI_ISL_893036, EPI_ISL_893037, EPI_ISL_893038, EPI_ISL_893039, EPI_ISL_893040, EPI_ISL_893041, EPI_ISL_893042, EPI_ISL_893043, EPI_ISL_893044, EPI_ISL_893045, EPI_ISL_893046, EPI_ISL_893047, EPI_ISL_893048, EPI_ISL_898329, EPI_ISL_898330, EPI_ISL_898331, EPI_ISL_898332, EPI_ISL_898333, EPI_ISL_898334, EPI_ISL_898335, EPI_ISL_898336, EPI_ISL_898337 | Yamagata Prefectural Institute of Public Health              | Pathogen Genomics Center, National Institute of Infectious<br>Diseases                  | Kentaro Itokawa; Makoto Kuroda; Masanori Hashino; Rina Tanaka; Tsuyoshi Sekizuka |
| see above                                                                                                                                                                                                                                                                                                                                                                                                                                                                                                                                                                                                                      |                                                              |                                                                                         |                                                                                  |
| EPI_ISL_862867                                                                                                                                                                                                                                                                                                                                                                                                                                                                                                                                                                                                                 | Yokohama City University Hospital                            | Fujita health University, School of Medicine, Department of<br>Microbiology             | Masahiro suzuki; Yohei Doi                                                       |









EPI\_ISL\_2772104, EPI\_ISL\_2772105, EPI\_ISL\_2772106, EPI\_ISL\_2772107, EPI\_ISL\_2772108, EPI\_ISL\_2772217, EPI\_ISL\_2772218, EPI\_ISL\_2772219, EPI\_ISL\_2772220, EPI\_ISL\_2772221, EPI\_ISL\_2772222, EPI\_ISL\_2772223, EPI\_ISL\_2772224, EPI\_ISL\_2772225, EPI\_ISL\_2772226, EPI\_ISL\_2772227, EPI\_ISL\_2772228, EPI\_ISL\_2772229, EPI\_ISL\_2772230, EPI\_ISL\_2772231, EPI\_ISL\_2772232, EPI\_ISL\_2772233, EPI\_ISL\_2772234, EPI\_ISL\_2772235, EPI\_ISL\_2772236, EPI\_ISL\_2772237, EPI\_ISL\_2772238, EPI\_ISL\_2772239, EPI\_ISL\_2772240, EPI\_ISL\_2772241, EPI\_ISL\_2772242, EPI\_ISL\_2772243, EPI\_ISL\_2772244, EPI\_ISL\_2772245, EPI\_ISL\_2772246, EPI\_ISL\_2772247, EPI\_ISL\_2772248, EPI\_ISL\_2772249, EPI\_ISL\_2772250, EPI\_ISL\_2772251, EPI\_ISL\_2772252, EPI\_ISL\_2772253, EPI\_ISL\_2772254, EPI\_ISL\_2772255, EPI\_ISL\_2772256, EPI\_ISL\_2772257, EPI\_ISL\_2772258, EPI\_ISL\_2772259, EPI\_ISL\_2772260, EPI\_ISL\_2772261, EPI\_ISL\_2772262, EPI\_ISL\_2772263, EPI\_ISL\_2772264, EPI\_ISL\_2772265, EPI\_ISL\_2772266, EPI\_ISL\_2772267, EPI\_ISL\_2772268, EPI\_ISL\_2772269, EPI\_ISL\_2772270, EPI\_ISL\_2772271, EPI\_ISL\_2772272, EPI\_ISL\_2772273, EPI\_ISL\_2772274, EPI\_ISL\_2772275, EPI\_ISL\_2772276, EPI\_ISL\_2772277, EPI\_ISL\_2772278, EPI\_ISL\_2772279, EPI\_ISL\_2772280, EPI\_ISL\_2772281, EPI\_ISL\_2772282, EPI\_ISL\_2772283, EPI\_ISL\_2772284, EPI\_ISL\_2772285, EPI\_ISL\_2772286, EPI\_ISL\_2772287, EPI\_ISL\_2772288, EPI\_ISL\_2772289, EPI\_ISL\_2772290, EPI\_ISL\_2772291, EPI\_ISL\_2772292, EPI\_ISL\_2772293, EPI\_ISL\_2772294, EPI\_ISL\_2772295, EPI\_ISL\_2772296, EPI\_ISL\_2772297, EPI\_ISL\_2772298, EPI\_ISL\_2772299, EPI\_ISL\_2772300, EPI\_ISL\_2772301, EPI\_ISL\_2772302, EPI\_ISL\_2772303, EPI\_ISL\_2772304, EPI\_ISL\_2772305, EPI\_ISL\_2772306, EPI\_ISL\_2772307, EPI\_ISL\_2772308, EPI\_ISL\_2772309, EPI\_ISL\_2772310, EPI\_ISL\_2772311, EPI\_ISL\_2772312, EPI\_ISL\_2772313, EPI\_ISL\_2772314, EPI\_ISL\_2772315, EPI\_ISL\_2772316, EPI\_ISL\_2772317, EPI\_ISL\_2772318, EPI\_ISL\_2772319, EPI\_ISL\_2772320, EPI\_ISL\_2772321, EPI\_ISL\_2772322, EPI\_ISL\_2772323, EPI\_ISL\_2772324, EPI\_ISL\_2772325, EPI\_ISL\_2772326, EPI\_ISL\_2772327, EPI\_ISL\_2772328, EPI\_ISL\_2772329, EPI\_ISL\_2772330, EPI\_ISL\_2772331, EPI\_ISL\_2772332, EPI\_ISL\_2772333, EPI\_ISL\_2772334, EPI\_ISL\_2772335, EPI\_ISL\_2772336, EPI\_ISL\_2772337, EPI\_ISL\_2772338, EPI\_ISL\_2772339, EPI\_ISL\_2772340, EPI\_ISL\_2772341, EPI\_ISL\_2772342, EPI\_ISL\_2772343, EPI\_ISL\_2772344, EPI\_ISL\_2772345, EPI\_ISL\_2772346, EPI\_ISL\_2772347, EPI\_ISL\_2772348, EPI\_ISL\_2772349, EPI\_ISL\_2772350, EPI\_ISL\_2772351, EPI\_ISL\_2772352, EPI\_ISL\_2772353, EPI\_ISL\_2772354, EPI\_ISL\_2772355, EPI\_ISL\_2772356, EPI\_ISL\_2772357, EPI\_ISL\_2772358, EPI\_ISL\_2772359, EPI\_ISL\_2772360, EPI\_ISL\_2772361, EPI\_ISL\_2772362, EPI\_ISL\_2772363, EPI\_ISL\_2772364, EPI\_ISL\_2772365, EPI\_ISL\_2772366, EPI\_ISL\_2772367, EPI\_ISL\_2772368, EPI\_ISL\_2772369, EPI\_ISL\_2772370, EPI\_ISL\_2772371, EPI\_ISL\_2772372, EPI\_ISL\_2772373, EPI\_ISL\_2772374, EPI\_ISL\_2772375, EPI\_ISL\_2772376, EPI\_ISL\_2772377, EPI\_ISL\_2772378, EPI\_ISL\_2772379, EPI\_ISL\_2772380, EPI\_ISL\_2772381, EPI\_ISL\_2772382, EPI\_ISL\_2772383, EPI\_ISL\_2772384, EPI\_ISL\_2772385, EPI\_ISL\_2772386, EPI\_ISL\_2772387, EPI\_ISL\_2772388, EPI\_ISL\_2772389, EPI\_ISL\_2772390, EPI\_ISL\_2772391, EPI\_ISL\_2772392, EPI\_ISL\_2772393, EPI\_ISL\_2772394, EPI\_ISL\_2772395, EPI\_ISL\_2772396, EPI\_ISL\_2772397, EPI\_ISL\_2772398, EPI\_ISL\_2772399, EPI\_ISL\_2772400, EPI\_ISL\_2772401, EPI\_ISL\_2772402, EPI\_ISL\_2772403, EPI\_ISL\_2772404, EPI\_ISL\_2772405, EPI\_ISL\_2772406, EPI\_ISL\_2772407, EPI\_ISL\_2772408, EPI\_ISL\_2772409, EPI\_ISL\_2772410, EPI\_ISL\_2772411, EPI\_ISL\_2772412, EPI\_ISL\_2772413, EPI\_ISL\_2772414, EPI\_ISL\_2772415, EPI\_ISL\_2772416, EPI\_ISL\_2772417, EPI\_ISL\_2772418, EPI\_ISL\_2772419, EPI\_ISL\_2772420, EPI\_ISL\_2772421, EPI\_ISL\_2772422, EPI\_ISL\_2772423, EPI\_ISL\_2772424, EPI\_ISL\_2772425, EPI\_ISL\_2772426, EPI\_ISL\_2772427, EPI\_ISL\_2772428, EPI\_ISL\_2772429, EPI\_ISL\_2772430, EPI\_ISL\_2772431, EPI\_ISL\_2772432, EPI\_ISL\_2772433, EPI\_ISL\_2772434, EPI\_ISL\_2772435, EPI\_ISL\_2772436, EPI\_ISL\_2772437, EPI\_ISL\_2772438, EPI\_ISL\_2772439, EPI\_ISL\_2772440, EPI\_ISL\_2772441, EPI\_ISL\_2772442, EPI\_ISL\_2772443, EPI\_ISL\_2772444, EPI\_ISL\_2772445, EPI\_ISL\_2772446, EPI\_ISL\_2772447, EPI\_ISL\_2772448, EPI\_ISL\_2772449, EPI\_ISL\_2772450, EPI\_ISL\_2772451, EPI\_ISL\_2772452, EPI\_ISL\_2772453, EPI\_ISL\_2772454, EPI\_ISL\_2772455, EPI\_ISL\_2772456, EPI\_ISL\_2772457, EPI\_ISL\_2772458, EPI\_ISL\_2772459, EPI\_ISL\_2772460, EPI\_ISL\_2772461, EPI\_ISL\_2772462, EPI\_ISL\_2772463, EPI\_ISL\_2772464, EPI\_ISL\_2772465, EPI\_ISL\_2772466, EPI\_ISL\_2772467, EPI\_ISL\_2772468, EPI\_ISL\_2772469, EPI\_ISL\_2772470, EPI\_ISL\_2772471, EPI\_ISL\_2772472, EPI\_ISL\_2772473, EPI\_ISL\_2772474, EPI\_ISL\_2772475, EPI\_ISL\_2772476, EPI\_ISL\_2772477, EPI\_ISL\_2772478, EPI\_ISL\_2772479, EPI\_ISL\_2772480, EPI\_ISL\_2772481, EPI\_ISL\_2772482, EPI\_ISL\_2772483, EPI\_ISL\_2772484, EPI\_ISL\_2772485, EPI\_ISL\_2772486, EPI\_ISL\_2772487, EPI\_ISL\_2772488, EPI\_ISL\_2772489, EPI\_ISL\_2772490, EPI\_ISL\_2772491, EPI\_ISL\_2772492, EPI\_ISL\_2772493, EPI\_ISL\_2772494, EPI\_ISL\_2772495, EPI\_ISL\_2772496, EPI\_ISL\_2772497, EPI\_ISL\_2772498, EPI\_ISL\_2772499

|           |                                                                    |                                                                     |                                                                                                                                                                                          |
|-----------|--------------------------------------------------------------------|---------------------------------------------------------------------|------------------------------------------------------------------------------------------------------------------------------------------------------------------------------------------|
| see above | SARS-CoV-2 testing team, National Institute of Infectious Diseases | Pathogen Genomics Center, National Institute of Infectious Diseases | Hazuka Y Furihata; Hiromizu Takahashi; Kentaro Itokawa; Makoto Kuroda; Masanori Hashino; Masumichi Saito; Naomi Nojiri; Nozomu Hanaoka; Rina Tanaka; Tsuguto Fujimoto; Tsuyoshi Sekizuka |
|-----------|--------------------------------------------------------------------|---------------------------------------------------------------------|------------------------------------------------------------------------------------------------------------------------------------------------------------------------------------------|



















|                                                                                                                                |                               |                                                      |
|--------------------------------------------------------------------------------------------------------------------------------|-------------------------------|------------------------------------------------------|
| EPI_ISL_2651125                                                                                                                | YAN CHAI HOSPITAL             | Hong Kong Department of Health                       |
| EPI_ISL_444044, EPI_ISL_463316, EPI_ISL_463317, EPI_ISL_510085, EPI_ISL_523837, EPI_ISL_539804, EPI_ISL_730618, EPI_ISL_730619 |                               |                                                      |
| see above                                                                                                                      | Yan Chai Hospital             | Hong Kong Department of Health                       |
| EPI_ISL_463323                                                                                                                 | Yuen Long JC GOPC             | Hong Kong Department of Health                       |
| EPI_ISL_2786994                                                                                                                | private medical practitioners | Hong Kong Department of Health                       |
| EPI_ISL_3038232, EPI_ISL_3086819                                                                                               | unknown                       | Hong Kong Department of Health                       |
| EPI_ISL_434570, EPI_ISL_450408, EPI_ISL_450409, EPI_ISL_450410, EPI_ISL_450411, EPI_ISL_450412                                 | unknown                       | Microbiology                                         |
| EPI_ISL_434563, EPI_ISL_434564, EPI_ISL_434565, EPI_ISL_434566, EPI_ISL_434567, EPI_ISL_434568, EPI_ISL_434569                 | unknown                       | Microbiology, The University of Hong Kong            |
| see above                                                                                                                      |                               |                                                      |
| EPI_ISL_450404, EPI_ISL_450405                                                                                                 | unknown                       | School of Public Health, The University of Hong Kong |

|                                                                                                                                                                                                                                                                                 |
|---------------------------------------------------------------------------------------------------------------------------------------------------------------------------------------------------------------------------------------------------------------------------------|
| Alan K.L. Tsang; Dominic N.C. Tsang; Edman T.K. Lam; Ken H.L. Ng; Peter C.W. Yip; Rickjason C.W. Chan                                                                                                                                                                           |
| Alan K.L. Tsang; Chan Rickjason C.W.; Cheng Peter K.C.; Dominic N.C. Tsang; Edman T.K. Lam; Lam Edman T.K.; Mak Gannon C.K.; Peter C.W. Yip; Rickjason C.W. Chan; Tsang Dominic N.C. Chan Rickjason C.W.; Cheng Peter K.C.; Lam Edman T.K.; Mak Gannon C.K.; Tsang Dominic N.C. |
| Alan K.L. Tsang; Edman T.K. Lam; Ken H.L. Ng; Peter C.W. Yip; Rickjason C.W. Chan                                                                                                                                                                                               |
| Andy Y.Y. Cheung; Brian H.M. Sit; Dominic N.C. Tsang; Edman T.K. Lam; J. Zheng; Kathy H.L. Po; Ken H.L. Ng; Rickjason C.W. Chan; T.C. Kwong                                                                                                                                     |
| K.-Y.; K.K.W.; K.K.W. and Yuen; To; Yuen                                                                                                                                                                                                                                        |

|                                                                                                                    |
|--------------------------------------------------------------------------------------------------------------------|
| K.-Y.; K.K.W. and Yuen; To                                                                                         |
| Brackman; C.J.; Chu; D.K.W.; D.N.C.; L.D.; L.L.M. and Peiris, M.; Perera; Poon; R.A.P.M.; Sims; Sit; T.H.S.; Tsang |

We gratefully acknowledge the following Authors from the Originating laboratories responsible for obtaining the specimens, as well as the Submitting laboratories where the genome data were generated and shared via GISAID, on which this research is based.

All Submitters of data may be contacted directly via [www.gisaid.org](http://www.gisaid.org)

Authors are sorted alphabetically.

| Accession ID                                                                                                                                                                                                                                                                                                                                                                                                                                                                                                                                                                                                                                                                                                                                                                                                                                                                                                                                                                                           | Originating Laboratory                                                                                                      | Submitting Laboratory                                                                                                          | Authors                                                                                                                                                                                                                                                                             |
|--------------------------------------------------------------------------------------------------------------------------------------------------------------------------------------------------------------------------------------------------------------------------------------------------------------------------------------------------------------------------------------------------------------------------------------------------------------------------------------------------------------------------------------------------------------------------------------------------------------------------------------------------------------------------------------------------------------------------------------------------------------------------------------------------------------------------------------------------------------------------------------------------------------------------------------------------------------------------------------------------------|-----------------------------------------------------------------------------------------------------------------------------|--------------------------------------------------------------------------------------------------------------------------------|-------------------------------------------------------------------------------------------------------------------------------------------------------------------------------------------------------------------------------------------------------------------------------------|
| EPI_ISL_450444                                                                                                                                                                                                                                                                                                                                                                                                                                                                                                                                                                                                                                                                                                                                                                                                                                                                                                                                                                                         | 20 Dongda Street, Fengtai District, Beijing, Beijing 100071, China                                                          | Dept. OPA, Beijing Institute of Microbiology and Epidemiology                                                                  | Fan, H.; Fang; Gong; J.H.; L.Q. and Liu, W.; Qi; R.Z.; X.A.; Zhang; Zheng, K.; Zheng, W.                                                                                                                                                                                            |
| EPI_ISL_450427                                                                                                                                                                                                                                                                                                                                                                                                                                                                                                                                                                                                                                                                                                                                                                                                                                                                                                                                                                                         | Anhui Provincial Center for Disease Control                                                                                 | Anhui Provincial CDC, Acute Infectious Disease Prevention & Ctrl                                                               | Chen, Q.; Ge, Y.; Gong, L.; He, J.; He, L.; Hou, S.; Jiang, L.; Li, W.; Liu, J.; Liu, Z.; Lu, S.; Sa, N.; Shi, Y.; Sun, Y.; Wu, J.; Yu, J.; Yuan, Y.; Zhang, Z.                                                                                                                     |
| EPI_ISL_1259400, EPI_ISL_1260834, EPI_ISL_1260835, EPI_ISL_1260836                                                                                                                                                                                                                                                                                                                                                                                                                                                                                                                                                                                                                                                                                                                                                                                                                                                                                                                                     | BSL-3 Lab, National Institute for Viral Disease Control and Prevention, Chinese Center for Disease Control and Prevention   | BSL-3 Lab, National Institute for Viral Disease Control and Prevention, Chinese Center for Disease Control and Prevention      | Dayan Wang; George F. Gao; Guizhen Wu; Jing Zhang; Jun Han; Peipei Liu; Shumei Zou; Xiang Zhao; Yuchao Wu; Zhixiao Chen                                                                                                                                                             |
| EPI_ISL_1117376, EPI_ISL_1117377, EPI_ISL_1117378, EPI_ISL_1168770, EPI_ISL_1168771                                                                                                                                                                                                                                                                                                                                                                                                                                                                                                                                                                                                                                                                                                                                                                                                                                                                                                                    | Beijing Center for Disease Prevention and Control                                                                           | Beijing Center for Disease Prevention and Control                                                                              | Bing Lyu; Daitao Zhang; Fu Li; Lijuan Chen; Quanyi Wang; Shujuan Cui; Yang Pan; Zhaomin Feng; Zhichao Liang                                                                                                                                                                         |
| EPI_ISL_412386                                                                                                                                                                                                                                                                                                                                                                                                                                                                                                                                                                                                                                                                                                                                                                                                                                                                                                                                                                                         | Beijing Ditan Hospital, Capital Medical University                                                                          | National Institute for Communicable Disease Control and Prevention, Chinese Center for Disease Control and Prevention          | Biao Kan; Chuansheng Li; Fangfang Jin; Haijian Zhou; Haofeng Xiong; Hebing Guo; Huizhu Wang; Jianbo Tan; Jie Gong; Jingjing Hao; Jingyuan Liu; Lili Gao; Lin Pu; Ming Zhang; Pan Xiang; Ruihong Li; Xiaoping Chen; Xin Lu; Xinmin Xu; Yajie Wang; Yanwen Xiong; Yao Sun; Yufeng Liu |
| EPI_ISL_410538, EPI_ISL_410539, EPI_ISL_410540, see above                                                                                                                                                                                                                                                                                                                                                                                                                                                                                                                                                                                                                                                                                                                                                                                                                                                                                                                                              | Beijing Institute of Microbiology and Epidemiology                                                                          | Beijing Institute of Microbiology and Epidemiology                                                                             | B. and Cui, Y.; Bao-Gui Jiang; Cui, Y.; Fan; Fan, H.; Guo, Y.; Hang; Hou, J.; Jia-Fu Jiang; Li; Li, B.; Mi, Z.; Mu, J.; Na Jia; Qin, E.; Song; Song, Y.; Teng; Teng, Y.; Tommy Tsan-Yuk Lam; Wu, Y.; Wu-Chun Cao; Xu, Z.; Ya-Wei Zhang; Yajun.; Yang, R.; Yong, Y.; Yue; Zhang, X.  |
| EPI_ISL_411959, EPI_ISL_411960, EPI_ISL_411961, see above                                                                                                                                                                                                                                                                                                                                                                                                                                                                                                                                                                                                                                                                                                                                                                                                                                                                                                                                              | Bioinfo, Vision Medicals, Lianhe                                                                                            | Bioinfo, Vision Medicals, Lianhe                                                                                               | W.H; Zhang                                                                                                                                                                                                                                                                          |
| EPI_ISL_411958                                                                                                                                                                                                                                                                                                                                                                                                                                                                                                                                                                                                                                                                                                                                                                                                                                                                                                                                                                                         | Bioinfo, Vision Medicals, Lianhe                                                                                            | Bioinfo, Vision Medicals, Lianhe                                                                                               | W.H; Zhang                                                                                                                                                                                                                                                                          |
| EPI_ISL_1039212                                                                                                                                                                                                                                                                                                                                                                                                                                                                                                                                                                                                                                                                                                                                                                                                                                                                                                                                                                                        | Biosafety Level 3 (BSL-3) core facility at Huazhong Agricultural University                                                 | State Key Laboratory of Agriculture Microbiology, Huazhong Agric Laboratory of Animal Virology, College of Veterinary Medicine | Yufei Zhang ; Kun Huang ; Zhong Zou ; Meilin Jin                                                                                                                                                                                                                                    |
| EPI_ISL_3154875                                                                                                                                                                                                                                                                                                                                                                                                                                                                                                                                                                                                                                                                                                                                                                                                                                                                                                                                                                                        | CAS Key Laboratory of Pathogenic Microbiology and Immunology, Institute of Microbiology, Chinese Academy of Sciences        | CAS Key Laboratory of Pathogenic Microbiology and Immunology, Institute of Microbiology, Chinese Academy of Sciences           | Chunge Zhang; Ning Zhang; Yuhai Bi; Yuhuan Gong                                                                                                                                                                                                                                     |
| EPI_ISL_412981                                                                                                                                                                                                                                                                                                                                                                                                                                                                                                                                                                                                                                                                                                                                                                                                                                                                                                                                                                                         | CR&WISCO GENERAL HOSPITAL                                                                                                   | Hubei Provincial Center for Disease Control and Prevention                                                                     | Bin Fang; Bo Yang; Bo Yu; Faxian Zhan; Guojun Ye; Jing Li; Junqiang Xu; Kun Cai; Linlin Liu; Xiang Li; Xiao Yu; Xixiang Huo; Yongzhong Jiang.                                                                                                                                       |
| EPI_ISL_512773, EPI_ISL_513296, EPI_ISL_513309                                                                                                                                                                                                                                                                                                                                                                                                                                                                                                                                                                                                                                                                                                                                                                                                                                                                                                                                                         | Center for Precision Medicine, Meizhou People's Hospital (Huangtang Hospital)                                               | Center for Precision Medicine, Meizhou People's Hospital (Huangtang Hospital)                                                  | Guo, X.; Wu, H.; Yu; Z. and Huang, Q.                                                                                                                                                                                                                                               |
| EPI_ISL_429852, EPI_ISL_429853, EPI_ISL_429854, EPI_ISL_429855, EPI_ISL_495459                                                                                                                                                                                                                                                                                                                                                                                                                                                                                                                                                                                                                                                                                                                                                                                                                                                                                                                         | Centers for Disease Control and Prevention of Lishui                                                                        | Department of Inspection , Centers for Disease Control and Prevention of Lishui                                                | Ji Jiansong; Ji Qiaoying; Wang Xiaoguang; Ye Bifeng; Ye Ling                                                                                                                                                                                                                        |
| EPI_ISL_430722, EPI_ISL_430723, EPI_ISL_430724, EPI_ISL_430725, EPI_ISL_430726, EPI_ISL_430727, EPI_ISL_430728, EPI_ISL_430729, EPI_ISL_430730, EPI_ISL_430731, EPI_ISL_430732, EPI_ISL_430733, EPI_ISL_430734, EPI_ISL_430735, EPI_ISL_430736, EPI_ISL_430737, EPI_ISL_430738, EPI_ISL_430739, EPI_ISL_430740, EPI_ISL_430741, EPI_ISL_430742, EPI_ISL_430743, EPI_ISL_430744, EPI_ISL_430745, EPI_ISL_430746                                                                                                                                                                                                                                                                                                                                                                                                                                                                                                                                                                                         | Chinese PLA Institute for Disease Control and Prevention                                                                    | Chinese PLA Institute for Disease Control and Prevention                                                                       | Lizhong Li; Peng Li , Jinhui Li                                                                                                                                                                                                                                                     |
| EPI_ISL_1970348, EPI_ISL_1970349                                                                                                                                                                                                                                                                                                                                                                                                                                                                                                                                                                                                                                                                                                                                                                                                                                                                                                                                                                       | Chongqing International Travel Health Care Center                                                                           | Chongqing Municipal Center for Disease Control and Prevention                                                                  | Dong Wang; Haiyan Wen; Hua Ling; Lan Zhou; Mingyue Wang; Rong Rong; Sheng Ye; Shuang Chen; Wenge Tang; Xingdan Luo; Yanqing Peng; Yun Tang; Zhangping Tan; Zhaohui Deng , Shuang Chen; Zhen Yu                                                                                      |
| EPI_ISL_1970347                                                                                                                                                                                                                                                                                                                                                                                                                                                                                                                                                                                                                                                                                                                                                                                                                                                                                                                                                                                        | Chongqing Yuzhong District Center For Disease Control And Prevention                                                        | Chongqing Municipal Center for Disease Control and Prevention                                                                  | Hua Ling; Jiaqi Li; Mingyue Wang; Rong Rong; Sheng Ye; Shuang Chen; Wenge Tang; Yingbing Zhou; Yun Tang; Yuyue Luo; Zhangping Tan; Zhen Yu                                                                                                                                          |
| EPI_ISL_424352                                                                                                                                                                                                                                                                                                                                                                                                                                                                                                                                                                                                                                                                                                                                                                                                                                                                                                                                                                                         | Clinical Laboratory, Fuyang City Center for Disease Control and Prevention                                                  | Clinical Laboratory, Fuyang City Center for Disease Control and Prevention                                                     | Ge, B.                                                                                                                                                                                                                                                                              |
| EPI_ISL_632935, EPI_ISL_2723562, EPI_ISL_2723563, EPI_ISL_2723564, EPI_ISL_2834002, EPI_ISL_2834003, EPI_ISL_2834004, EPI_ISL_2840853, EPI_ISL_2840854, EPI_ISL_2840855, EPI_ISL_2840856, EPI_ISL_2840857, EPI_ISL_2840858, EPI_ISL_2840859, EPI_ISL_2840860, EPI_ISL_2863929, EPI_ISL_2863930, EPI_ISL_2863931, EPI_ISL_2863932, EPI_ISL_2863933, EPI_ISL_2863934, EPI_ISL_2863935, EPI_ISL_2893772, EPI_ISL_2893773, EPI_ISL_2893774, EPI_ISL_2893775, EPI_ISL_2893776, EPI_ISL_2893777, EPI_ISL_2896214, EPI_ISL_2896215, EPI_ISL_2896216, EPI_ISL_2896217, EPI_ISL_2896218, EPI_ISL_2896219, EPI_ISL_2896220, EPI_ISL_2896221, EPI_ISL_2896222, EPI_ISL_2896223, EPI_ISL_2896224, EPI_ISL_2896225, EPI_ISL_2896226, EPI_ISL_2896227, EPI_ISL_2896228, EPI_ISL_2896229, EPI_ISL_2896230, EPI_ISL_2896231, EPI_ISL_3305842, EPI_ISL_3305843, EPI_ISL_3305844, EPI_ISL_3305845, EPI_ISL_3305846, EPI_ISL_3305847, EPI_ISL_3305848, EPI_ISL_3305849, EPI_ISL_3305850, EPI_ISL_3305851, EPI_ISL_3305852 | Department of Acute Infectious Diseases Control and Prevention, Yunnan Provincial Center for Disease Control and Prevention | Duo Li; Jienan Zhou; Meiling Zhang; Senquan Jia; Wenpeng Gu; Xiaonan Zhao; Xiaoqing Fu; Zhaosheng Liu                          |                                                                                                                                                                                                                                                                                     |
| EPI_ISL_632934                                                                                                                                                                                                                                                                                                                                                                                                                                                                                                                                                                                                                                                                                                                                                                                                                                                                                                                                                                                         | Department of Acute Infectious Diseases Control and Prevention, Yunnan Provincial Center for Disease Control and Prevention | Department of Acute Infectious Diseases Control and Prevention, Yunnan Provincial Center for Disease Control and Prevention    | Jienan Zhou; Meiling Zhang; Senquan Jia; Xiaonan Zhao; Xiaoqing Fu                                                                                                                                                                                                                  |
| EPI_ISL_412034, EPI_ISL_412035, EPI_ISL_412036, EPI_ISL_412037, EPI_ISL_412038, EPI_ISL_412039                                                                                                                                                                                                                                                                                                                                                                                                                                                                                                                                                                                                                                                                                                                                                                                                                                                                                                         | Department of Clinical Laboratory, Tongji Medical College, Huazhong University of Science and Technology                    | Department of Clinical Laboratory, Tongji Medical College, Huazhong University of Science and Technology                       | Liu, W.; Song, H.; Sun; Xiang, R.; Y; Z. and Liu; Zhang, Q.                                                                                                                                                                                                                         |
| EPI_ISL_429239                                                                                                                                                                                                                                                                                                                                                                                                                                                                                                                                                                                                                                                                                                                                                                                                                                                                                                                                                                                         | Department of Clinical Laboratory, the First People's Hospital of Yunnan Province                                           | Department of Clinical Laboratory, the First People's Hospital of Yunnan Province                                              | Guiqian Zhang; Xin Fan; Ya Xu; Yi Sun; Yu Zhang; Ziqin Dian                                                                                                                                                                                                                         |
| EPI_ISL_605929, EPI_ISL_605930                                                                                                                                                                                                                                                                                                                                                                                                                                                                                                                                                                                                                                                                                                                                                                                                                                                                                                                                                                         | Department of Infectious Disease Prevention and Control, Henan Provincial Center for Disease Control and Prevention         | Department of Infectious Disease Prevention and Control, Henan Provincial Center for Disease Control and Prevention            | Guo, W.; Hu, X.; Huang, X.; Li, D.; Li, X.; Lu, S.; Wu, B.; Ye, Y.                                                                                                                                                                                                                  |
| EPI_ISL_1255104                                                                                                                                                                                                                                                                                                                                                                                                                                                                                                                                                                                                                                                                                                                                                                                                                                                                                                                                                                                        | Department of Infectious Disease Prevention and                                                                             | Department of Infectious Disease Prevention and Control,                                                                       | B. and Huang, X.; Li, X.; Lu, S.; Wu                                                                                                                                                                                                                                                |

|                                                                                                                                                                                                                                                                                                                                                                                                                                                                                                                                                                                                                                                                                                                                                                                                                                                                                |                                                                                                                  |                                                                                                                                                                                                                                                                                                                                                                                                                                                        |                                                                                                                                                                                                                                                                                                                                                                                                         |
|--------------------------------------------------------------------------------------------------------------------------------------------------------------------------------------------------------------------------------------------------------------------------------------------------------------------------------------------------------------------------------------------------------------------------------------------------------------------------------------------------------------------------------------------------------------------------------------------------------------------------------------------------------------------------------------------------------------------------------------------------------------------------------------------------------------------------------------------------------------------------------|------------------------------------------------------------------------------------------------------------------|--------------------------------------------------------------------------------------------------------------------------------------------------------------------------------------------------------------------------------------------------------------------------------------------------------------------------------------------------------------------------------------------------------------------------------------------------------|---------------------------------------------------------------------------------------------------------------------------------------------------------------------------------------------------------------------------------------------------------------------------------------------------------------------------------------------------------------------------------------------------------|
|                                                                                                                                                                                                                                                                                                                                                                                                                                                                                                                                                                                                                                                                                                                                                                                                                                                                                | Control, Henan Provincial Center for Disease Control and Prevention                                              | Henan Provincial Center for Disease Control and Prevention                                                                                                                                                                                                                                                                                                                                                                                             |                                                                                                                                                                                                                                                                                                                                                                                                         |
| EPI_ISL_1678790, EPI_ISL_1678810                                                                                                                                                                                                                                                                                                                                                                                                                                                                                                                                                                                                                                                                                                                                                                                                                                               | Department of Medical Microbiology & Infection prevention, Amsterdam University Medical Centers location AMC     | Department of Medical Microbiology & Infection prevention, Amsterdam University Medical Centers location AMC                                                                                                                                                                                                                                                                                                                                           | Fokla Zorgdrager; Janke Schinkel; Marcel Jonges; Matthijs Welkers; Menno de Jong; Robin van Houdt; Sebastien Matamoros; Sjoerd Rebers                                                                                                                                                                                                                                                                   |
| EPI_ISL_413485                                                                                                                                                                                                                                                                                                                                                                                                                                                                                                                                                                                                                                                                                                                                                                                                                                                                 | Department of microbiology laboratory, Anhui Provincial Center for Disease Control and Prevention                | Department of microbiology laboratory, Anhui Provincial Center for Disease Control and Prevention                                                                                                                                                                                                                                                                                                                                                      | Bin Su; Jun He; Junling Yu; Qingqing Chen; Weidong Li; Weiwei Li; Yinglu Ge; Yong Sun; Yonglin Shi; Yuan Yuan; Zhirong Liu; Zhuhui Zhang                                                                                                                                                                                                                                                                |
| EPI_ISL_1121993, EPI_ISL_1122015, EPI_ISL_1122016                                                                                                                                                                                                                                                                                                                                                                                                                                                                                                                                                                                                                                                                                                                                                                                                                              | Emergency department of COVID-19, Beijing Ditan Hospital                                                         | National Institute for Viral Disease Control and Prevention                                                                                                                                                                                                                                                                                                                                                                                            | 3*; Di Tian1; Gang Liu1; Gang Wan1; Jianbo Tan1; Long Liu1; Pan Xiang1; Shuangli Zhu2; Shuping Cui1; Tingyu Zhang1; Wei Zhang1#; Wenbo Xu2# and Zhihai Chen1#; Xianbo Wang1; Xiang Zhao2; Yang Song2*; Yanhai Wang2; Yanli Xu1; Yu Wang1; Ziruo Ge1*                                                                                                                                                    |
| EPI_ISL_1122017                                                                                                                                                                                                                                                                                                                                                                                                                                                                                                                                                                                                                                                                                                                                                                                                                                                                | Emergency department of COVID-19, Beijing Ditan Hospital, Capital Medical University, Beijing, China.            | National Institute for Viral Disease Control and Prevention                                                                                                                                                                                                                                                                                                                                                                                            | 3*; Di Tian1; Gang Liu1; Gang Wan1; Jianbo Tan1; Long Liu1; Pan Xiang1; Shuangli Zhu2; Shuping Cui1; Tingyu Zhang1; Wei Zhang1#; Wenbo Xu2# and Zhihai Chen1#; Xianbo Wang1; Xiang Zhao2; Yang Song2*; Yanhai Wang2; Yanli Xu1; Yu Wang1; Ziruo Ge1*                                                                                                                                                    |
| EPI_ISL_3501737, EPI_ISL_3501738, EPI_ISL_3501739, EPI_ISL_3501740, EPI_ISL_3501741                                                                                                                                                                                                                                                                                                                                                                                                                                                                                                                                                                                                                                                                                                                                                                                            | Fourth Affiliated Hospital, College of Medicine, Zhejiang University                                             | Fourth Affiliated Hospital, College of Medicine, Zhejiang University                                                                                                                                                                                                                                                                                                                                                                                   | Huina Tang; Ke Xing; Lele Li; Shufa Zheng; Tian Liu; Wei Xu; Wenxu Yu; Xiaoping Xia; Xueke Liu; Yingping Wu; Yutong He                                                                                                                                                                                                                                                                                  |
| EPI_ISL_2433280, EPI_ISL_2433281, EPI_ISL_2433282, EPI_ISL_2433283, EPI_ISL_2433284                                                                                                                                                                                                                                                                                                                                                                                                                                                                                                                                                                                                                                                                                                                                                                                            | Fourth affiliated hospital, college of medicine, zhejiang university                                             | Fourth affiliated hospital, college of medicine, zhejiang university                                                                                                                                                                                                                                                                                                                                                                                   | huina tang; ke xing; lele li; shufa zheng; tian liu; wei xu; wenxu yu; xiaoping xia; xueke liu; yingping wu; yutong he                                                                                                                                                                                                                                                                                  |
| EPI_ISL_411060, EPI_ISL_411066, EPI_ISL_431118, see above                                                                                                                                                                                                                                                                                                                                                                                                                                                                                                                                                                                                                                                                                                                                                                                                                      | Fujian Center for Disease Control and Prevention                                                                 | Fujian Center for Disease Control and Prevention                                                                                                                                                                                                                                                                                                                                                                                                       | Chen Wei; He Wenxiang; Huang Zhimiao; Lin Qi; Weng Yuwei; Zhang Yanhua                                                                                                                                                                                                                                                                                                                                  |
| EPI_ISL_406798, EPI_ISL_406799, EPI_ISL_406800, EPI_ISL_406801                                                                                                                                                                                                                                                                                                                                                                                                                                                                                                                                                                                                                                                                                                                                                                                                                 | General Hospital of Central Theater Command of People's Liberation Army of China                                 | BGI & Institute of Microbiology, Chinese Academy of Sciences & Shandong First Medical University & Shandong Academy of Medical Sciences & General Hospital of Central Theater Command of People's Liberation Army of China                                                                                                                                                                                                                             | Weifeng Shi and Zhenhong Hu; Weijun Chen; Yuhai Bi                                                                                                                                                                                                                                                                                                                                                      |
| EPI_ISL_1969691, EPI_ISL_1969692                                                                                                                                                                                                                                                                                                                                                                                                                                                                                                                                                                                                                                                                                                                                                                                                                                               | Guangdong Provincial Center for Disease Control and Prevention                                                   | National Institute for Viral Disease Control and Prevention, China CDC                                                                                                                                                                                                                                                                                                                                                                                 | Baisheng; Min Kang; Xiang Zhao; Xiaoling Deng; Yang Song; Yao Hu; Zhencui Li                                                                                                                                                                                                                                                                                                                            |
| EPI_ISL_2536954                                                                                                                                                                                                                                                                                                                                                                                                                                                                                                                                                                                                                                                                                                                                                                                                                                                                | Guangdong Provincial Center for Disease Control and Prevention, The Biological safety level-3 (BSL-3) Laboratory | Guangdong Provincia Center for Disease Control and Prevention, Institute of Pathogenic Microbiology, Respiratory Pathogens Laboratory.                                                                                                                                                                                                                                                                                                                 | Zhang Huan                                                                                                                                                                                                                                                                                                                                                                                              |
| EPI_ISL_406531                                                                                                                                                                                                                                                                                                                                                                                                                                                                                                                                                                                                                                                                                                                                                                                                                                                                 | Guangdong Provincial Center for Diseases Control and Prevention; Guangdong Provincial Public Health              | Guangdong Provincial Center for Disease Control and Prevention                                                                                                                                                                                                                                                                                                                                                                                         | Baisheng Li; Changwen Ke; Feng Ruan; Guanhao He; Haojie Zhong; Huihong Deng; Jianfeng He; Jianpeng Xiao; Jianxiang Geng; Jianxiong Hu; Jie Wu; Jing Lu; Lifeng Lin; Lijun Liang; Lirong Zou; Min Kang; Qi Zhu; Shuijiang Mei; Songjian Xiao; Tao Liu; Tie Song; Weilin Zeng; Wenjun Ma; Xing Li; Xiujuan Tang; Xue Zhuang; Xuguang Chen; Ying Wang; Yingchao Song; Yingtao Zhang; Yuhuang Liao; Zhe Liu |
| EPI_ISL_406533                                                                                                                                                                                                                                                                                                                                                                                                                                                                                                                                                                                                                                                                                                                                                                                                                                                                 | Guangdong Provincial Center for Diseases Control and Prevention; Guangdong Provincial Public Health              | Guangdong Provincial Center for Diseases Control and Prevention                                                                                                                                                                                                                                                                                                                                                                                        | Baisheng Li; Changwen Ke; Feng Ruan; Guanhao He; Haojie Zhong; Huihong Deng; Jianfeng He; Jianpeng Xiao; Jianxiang Geng; Jianxiong Hu; Jie Wu; Jing Lu; Lifeng Lin; Lijun Liang; Lirong Zou; Min Kang; Qi Zhu; Shuijiang Mei; Songjian Xiao; Tao Liu; Tie Song; Weilin Zeng; Wenjun Ma; Xing Li; Xiujuan Tang; Xue Zhuang; Xuguang Chen; Ying Wang; Yingchao Song; Yingtao Zhang; Yuhuang Liao; Zhe Liu |
| EPI_ISL_403932, EPI_ISL_403933, EPI_ISL_403934, EPI_ISL_403935, EPI_ISL_403936, EPI_ISL_403937                                                                                                                                                                                                                                                                                                                                                                                                                                                                                                                                                                                                                                                                                                                                                                                 | Guangdong Provincial Center for Diseases Control and Prevention; Guangdong Provincial Public Health              | Department of Microbiology, Guangdong Provincial Center for Diseases Control and Prevention                                                                                                                                                                                                                                                                                                                                                            | Baisheng Li; Changwen Ke; Feng Ruan; Guanhao He; Haojie Zhong; Huihong Deng; Jianfeng He; Jianpeng Xiao; Jianxiang Geng; Jianxiong Hu; Jie Wu; Jing Lu; Lifeng Lin; Lijun Liang; Lirong Zou; Min Kang; Qi Zhu; Shuijiang Mei; Songjian Xiao; Tao Liu; Tie Song; Weilin Zeng; Wenjun Ma; Xing Li; Xiujuan Tang; Xue Zhuang; Xuguang Chen; Ying Wang; Yingchao Song; Yingtao Zhang; Yuhuang Liao; Zhe Liu |
| EPI_ISL_406534, EPI_ISL_406535, EPI_ISL_406536                                                                                                                                                                                                                                                                                                                                                                                                                                                                                                                                                                                                                                                                                                                                                                                                                                 | Guangdong Provincial Center for Diseases Control and Prevention; Guangdong Provincial Public Health              | Guangdong Provincial Center for Diseases Control and Prevention                                                                                                                                                                                                                                                                                                                                                                                        | Baisheng Li; Changwen Ke; Feng Ruan; Guanhao He; Haojie Zhong; Huihong Deng; Jianfeng He; Jianpeng Xiao; Jianxiang Geng; Jianxiong Hu; Jie Wu; Jing Lu; Lifeng Lin; Lijun Liang; Lirong Zou; Min Kang; Qi Zhu; Shuijiang Mei; Songjian Xiao; Tao Liu; Tie Song; Weilin Zeng; Wenjun Ma; Xing Li; Xiujuan Tang; Xue Zhuang; Xuguang Chen; Ying Wang; Yingchao Song; Yingtao Zhang; Yuhuang Liao; Zhe Liu |
| EPI_ISL_406538                                                                                                                                                                                                                                                                                                                                                                                                                                                                                                                                                                                                                                                                                                                                                                                                                                                                 | Guangdong Provincial Center for Diseases Control and Prevention; Guangdong Provincial Institute of Public Health | Guangdong Provincial Center for Diseases Control and Prevention                                                                                                                                                                                                                                                                                                                                                                                        | Baisheng Li; Changwen Ke; Feng Ruan; Guanhao He; Haojie Zhong; Huihong Deng; Jianfeng He; Jianpeng Xiao; Jianxiang Geng; Jianxiong Hu; Jie Wu; Jing Lu; Lifeng Lin; Lijun Liang; Lirong Zou; Min Kang; Qi Zhu; Shuijiang Mei; Songjian Xiao; Tao Liu; Tie Song; Weilin Zeng; Wenjun Ma; Xing Li; Xiujuan Tang; Xue Zhuang; Xuguang Chen; Ying Wang; Yingchao Song; Yingtao Zhang; Yuhuang Liao; Zhe Liu |
| EPI_ISL_428440, EPI_ISL_428441, EPI_ISL_428442, EPI_ISL_428443, EPI_ISL_428444, EPI_ISL_428445, EPI_ISL_428446, EPI_ISL_428447, EPI_ISL_428448, EPI_ISL_428449, EPI_ISL_428450, EPI_ISL_428451, EPI_ISL_428452, EPI_ISL_428453, EPI_ISL_428454, EPI_ISL_428455, EPI_ISL_428456, EPI_ISL_428457, EPI_ISL_428458, EPI_ISL_428459, EPI_ISL_428460, EPI_ISL_428461, EPI_ISL_428462, EPI_ISL_428463, see above                                                                                                                                                                                                                                                                                                                                                                                                                                                                      | Guangdong Provincial Center for Diseases Control and Prevention; Guangdong Provincial Institute of Public Health | School of Public Health, The University of Hong Kong                                                                                                                                                                                                                                                                                                                                                                                                   | Bosheng Li; Hanri Zeng; Haogao Gu; Hui-Ling Yen; Jie Wu; Leo L.M. Poon; Lijun Liang; Tie Song; Yao Hu; Yingchao Song; Zhencui Li                                                                                                                                                                                                                                                                        |
| EPI_ISL_413850, EPI_ISL_413851, EPI_ISL_413852, EPI_ISL_413853, EPI_ISL_413854, EPI_ISL_413855, EPI_ISL_413856, EPI_ISL_413857, EPI_ISL_413858, EPI_ISL_413859, EPI_ISL_413860, EPI_ISL_413861, EPI_ISL_413862, EPI_ISL_413863, EPI_ISL_413864, EPI_ISL_413865, EPI_ISL_413866, EPI_ISL_413867, EPI_ISL_413868, EPI_ISL_413869, EPI_ISL_413870, EPI_ISL_413871, EPI_ISL_413872, EPI_ISL_413873, EPI_ISL_413874, EPI_ISL_413875, EPI_ISL_413876, EPI_ISL_413877, EPI_ISL_413878, EPI_ISL_413879, EPI_ISL_413880, EPI_ISL_413881, EPI_ISL_413882, EPI_ISL_413883, EPI_ISL_413884, EPI_ISL_413885, EPI_ISL_413886, EPI_ISL_413887, EPI_ISL_413888, EPI_ISL_413889, EPI_ISL_413890, EPI_ISL_413891, EPI_ISL_413892, EPI_ISL_413893, EPI_ISL_413894, EPI_ISL_413895, EPI_ISL_413896, EPI_ISL_413897, EPI_ISL_413898, EPI_ISL_413899, EPI_ISL_413900, EPI_ISL_413901, EPI_ISL_413902 | Guangdong Provincial Institution of Public Health                                                                | Andrew Rambaut; Bo Peng; Changwen Ke; Chuming Liang; Huanying Zheng; Huifang Lin; Jing Lu; Jingju Peng; Jufeng Sun; Josh Quick; Juan Su; Kang Min; Kuibiao Li; Lilian Zeng; Liu Zhe; Louis du Plessis; Minfeng Liang; Moritz Kraemer; Nick Loman; Nuno Faria; Oliver Pybus; Pingping Zhou; Qianlin Xiong; Ru bai; Ruilin Sun; Runyu Yuan; Sarah François; Shisong Fang; Song Tie; Tao Liu; Verity Hill; Wei Li; Wenjun Ma; Wenzhe Su; Xi Tang; Jing Lu |                                                                                                                                                                                                                                                                                                                                                                                                         |
| EPI_ISL_444969                                                                                                                                                                                                                                                                                                                                                                                                                                                                                                                                                                                                                                                                                                                                                                                                                                                                 | Guangzhou Eighth People's Hospital (Jiahe Sector)                                                                | Institute of Human Virology, Zhongshan School of Medicine, Sun Yat-sen University                                                                                                                                                                                                                                                                                                                                                                      | Bingfeng Liu; Fang Li; Fei Yu; Feng Huang; Fengyu Hu; Hui Zhang; Huimin Fan; Jun Liu; Junsong Zhang; Kai Deng; Mang Shi; Ruosu Ying; Ting Pan; Xu Zhang; Yiwen Zhang                                                                                                                                                                                                                                    |
| EPI_ISL_407313                                                                                                                                                                                                                                                                                                                                                                                                                                                                                                                                                                                                                                                                                                                                                                                                                                                                 | Hangzhou Center for Disease Control and Prevention                                                               | Hangzhou Center for Disease Control and Prevention                                                                                                                                                                                                                                                                                                                                                                                                     | Haoqiu Wang; Hua Yu; Jun Li; Lingfeng Mao; Qingxin Kong; Shuchang Chen; Xin Qian; Xinfen Yu; Xuchu Wang; Zhou Sun                                                                                                                                                                                                                                                                                       |
| EPI_ISL_418510                                                                                                                                                                                                                                                                                                                                                                                                                                                                                                                                                                                                                                                                                                                                                                                                                                                                 | Hangzhou Center for Disease Control and Prevention                                                               | Inspection Center of Hangzhou Center for Disease Control and Prevention                                                                                                                                                                                                                                                                                                                                                                                | Li jun; Pan jingcao; Wang haoqiu; Yu hua; Yu xinfeng                                                                                                                                                                                                                                                                                                                                                    |
| EPI_ISL_418506                                                                                                                                                                                                                                                                                                                                                                                                                                                                                                                                                                                                                                                                                                                                                                                                                                                                 | Hangzhou Center for Disease Control and Prevention                                                               | Inspection Center of Hangzhou Center for Disease Control and Prevention                                                                                                                                                                                                                                                                                                                                                                                | Li jun; Pan jingcao; Wang haoqiu; Yu hua; Yu xinfeng                                                                                                                                                                                                                                                                                                                                                    |

|                                                                                                                                                                                                                                                                                                                                                                                                                                                                                                                                                                                                                                                                                                                                                                                                                                                                                                                                                                                                                                                                                |                                                                                                                                   |                                                                                                                                                                  |                                                                                                                                                                  |                                                                                                                                                                                                                                                                                               |
|--------------------------------------------------------------------------------------------------------------------------------------------------------------------------------------------------------------------------------------------------------------------------------------------------------------------------------------------------------------------------------------------------------------------------------------------------------------------------------------------------------------------------------------------------------------------------------------------------------------------------------------------------------------------------------------------------------------------------------------------------------------------------------------------------------------------------------------------------------------------------------------------------------------------------------------------------------------------------------------------------------------------------------------------------------------------------------|-----------------------------------------------------------------------------------------------------------------------------------|------------------------------------------------------------------------------------------------------------------------------------------------------------------|------------------------------------------------------------------------------------------------------------------------------------------------------------------|-----------------------------------------------------------------------------------------------------------------------------------------------------------------------------------------------------------------------------------------------------------------------------------------------|
| EPI_ISL_418441, EPI_ISL_418442, EPI_ISL_418502, EPI_ISL_418503, EPI_ISL_418504, EPI_ISL_418507, EPI_ISL_418508, EPI_ISL_418509, EPI_ISL_418511, EPI_ISL_418512, EPI_ISL_418513, EPI_ISL_418514, EPI_ISL_418515                                                                                                                                                                                                                                                                                                                                                                                                                                                                                                                                                                                                                                                                                                                                                                                                                                                                 | see above                                                                                                                         | Hangzhou Center for Disease Control and Prevention                                                                                                               | Inspection Center of Hangzhou Center for Disease Control and Prevention                                                                                          | Li Jun; Pan jingcao; Wang haoqiu; Yu hua; Yu xinfeng                                                                                                                                                                                                                                          |
| EPI_ISL_406970                                                                                                                                                                                                                                                                                                                                                                                                                                                                                                                                                                                                                                                                                                                                                                                                                                                                                                                                                                                                                                                                 | Hangzhou Center for Disease and Control Microbiology Lab                                                                          | Hangzhou Center for Disease and Control Microbiology Lab                                                                                                         |                                                                                                                                                                  | Li Jun; Wang Haoqiu; Yu Hua; Yu Xinfeng                                                                                                                                                                                                                                                       |
| EPI_ISL_421221, EPI_ISL_421222, EPI_ISL_421223, EPI_ISL_421224, EPI_ISL_421225, EPI_ISL_421226, EPI_ISL_421227, EPI_ISL_421228, EPI_ISL_421229, EPI_ISL_421230, EPI_ISL_421231, EPI_ISL_421232, EPI_ISL_421233, EPI_ISL_421234, EPI_ISL_421235, EPI_ISL_421236, EPI_ISL_482575, EPI_ISL_482576, EPI_ISL_482577, EPI_ISL_482578, EPI_ISL_482579, EPI_ISL_482580, EPI_ISL_482581, EPI_ISL_482582, EPI_ISL_482583, EPI_ISL_482584, EPI_ISL_482585, EPI_ISL_482586                                                                                                                                                                                                                                                                                                                                                                                                                                                                                                                                                                                                                 | see above                                                                                                                         | Hangzhou Center for Diseases Control and Prevention                                                                                                              | Hangzhou Center for Diseases Control and Prevention                                                                                                              | Haoqiu Wang; Hua Yu; Jun Li; Junfang Chen; Lingfeng Mao; Shuchang Chen; Xin Qian; Xinfen Yu; Xuchu Wang; Zhou Sun                                                                                                                                                                             |
| EPI_ISL_796012, EPI_ISL_796013, EPI_ISL_796014, EPI_ISL_796015, EPI_ISL_796016, EPI_ISL_796017, EPI_ISL_796018, EPI_ISL_796019, EPI_ISL_796020, EPI_ISL_796021, EPI_ISL_796022, EPI_ISL_796023, EPI_ISL_796024, EPI_ISL_796025, EPI_ISL_796026                                                                                                                                                                                                                                                                                                                                                                                                                                                                                                                                                                                                                                                                                                                                                                                                                                 | see above                                                                                                                         | Hebei Provincial Center for Disease Control and Prevention, Shijiazhuang, Hebei Province; National Institute for Viral Disease Control and Prevention, China CDC | Hebei Provincial Center for Disease Control and Prevention, Shijiazhuang, Hebei Province; National Institute for Viral Disease Control and Prevention, China CDC | George F. Gao; Nankun Liu; Qi Li; Shunxiang Qi; Wenbo Xu; Xiang Zhao; Yang Song                                                                                                                                                                                                               |
| EPI_ISL_413518, EPI_ISL_413519, EPI_ISL_413520, EPI_ISL_413521, EPI_ISL_514752                                                                                                                                                                                                                                                                                                                                                                                                                                                                                                                                                                                                                                                                                                                                                                                                                                                                                                                                                                                                 | see above                                                                                                                         | Infectious Disease Control Center, Center for Disease Control and Prevention of PLA                                                                              | Infectious Disease Control Center, Center for Disease Control and Prevention of PLA                                                                              | Li, J.; Li, L.; Li, P.; Li, Z.; P. and Li, P.; Qiu, S.; Song, H.                                                                                                                                                                                                                              |
| EPI_ISL_962528, EPI_ISL_962529, EPI_ISL_962530, EPI_ISL_962531, EPI_ISL_962532, EPI_ISL_962533, EPI_ISL_962534, EPI_ISL_962535, EPI_ISL_962536, EPI_ISL_962537, EPI_ISL_962538, EPI_ISL_962539, EPI_ISL_962540, EPI_ISL_962541, EPI_ISL_962542, EPI_ISL_962543, EPI_ISL_962544, EPI_ISL_962545, EPI_ISL_962546, EPI_ISL_962547, EPI_ISL_962548, EPI_ISL_962549, EPI_ISL_962550, EPI_ISL_962551, EPI_ISL_962552, EPI_ISL_962553, EPI_ISL_962554, EPI_ISL_962555, EPI_ISL_962556, EPI_ISL_962557, EPI_ISL_962558, EPI_ISL_962559, EPI_ISL_962560, EPI_ISL_962561, EPI_ISL_962562, EPI_ISL_962563, EPI_ISL_962564, EPI_ISL_962565, EPI_ISL_962566, EPI_ISL_962567, EPI_ISL_962568, EPI_ISL_962569, EPI_ISL_962570, EPI_ISL_962571, EPI_ISL_962572, EPI_ISL_962573, EPI_ISL_962574, EPI_ISL_962575, EPI_ISL_962576, EPI_ISL_962577, EPI_ISL_962578, EPI_ISL_962579, EPI_ISL_962580, EPI_ISL_962581, EPI_ISL_962582, EPI_ISL_962583, EPI_ISL_962584, EPI_ISL_962868, EPI_ISL_962869, EPI_ISL_962870, EPI_ISL_962871, EPI_ISL_962872, EPI_ISL_962873, EPI_ISL_962874, EPI_ISL_962875 | see above                                                                                                                         | Infectious Disease Control and Prevention Institute                                                                                                              | Infectious Disease Control and Prevention Institute                                                                                                              | Bo Pang; Jianxian Wang; Julong Wu; Mingxiao Yao; Ti Liu; Xiaolin Jiang; Yan Li; Yujie He; Yuwei Zhang; Zengqiang Kou                                                                                                                                                                          |
| EPI_ISL_3611059, EPI_ISL_3611060                                                                                                                                                                                                                                                                                                                                                                                                                                                                                                                                                                                                                                                                                                                                                                                                                                                                                                                                                                                                                                               | see above                                                                                                                         | Infectious Disease Department of Epidemiology, Beijing Institute of Microbiology and Epidemiology                                                                | Infectious Disease Department of Epidemiology, Beijing Institute of Microbiology and Epidemiology                                                                | Jie Bai; Lei Huang; Mai-Juan Ma                                                                                                                                                                                                                                                               |
| EPI_ISL_450437                                                                                                                                                                                                                                                                                                                                                                                                                                                                                                                                                                                                                                                                                                                                                                                                                                                                                                                                                                                                                                                                 | Infectious Disease Hospital, Central Laboratory                                                                                   | Infectious Disease Hospital, Central Laboratory                                                                                                                  |                                                                                                                                                                  | Yan, Y.                                                                                                                                                                                                                                                                                       |
| EPI_ISL_539333, EPI_ISL_539334, EPI_ISL_539335, EPI_ISL_539336, EPI_ISL_539337, EPI_ISL_539338, EPI_ISL_539339                                                                                                                                                                                                                                                                                                                                                                                                                                                                                                                                                                                                                                                                                                                                                                                                                                                                                                                                                                 | see above                                                                                                                         | Institute of Disease Control and Prevention, People's Liberation Army                                                                                            | Institute of Disease Control and Prevention, People's Liberation Army                                                                                            | Li, P.; Qiu, S.                                                                                                                                                                                                                                                                               |
| EPI_ISL_527871                                                                                                                                                                                                                                                                                                                                                                                                                                                                                                                                                                                                                                                                                                                                                                                                                                                                                                                                                                                                                                                                 | Institute of Medical Biology, Chinese Academy of Medical Sciences and Peking Union Medical College                                | Institute of Medical Biology, Chinese Academy of Medical Sciences and Peking Union Medical College                                                               |                                                                                                                                                                  | Chen, H.; Fan, S.; G. and Li, Q.; Jiang; Liao, Y.; Liu, L.; Wang, L.; Xie, Z.; Xu, X.; Zheng, H.; Zhou, X.                                                                                                                                                                                    |
| EPI_ISL_402123, EPI_ISL_403928, EPI_ISL_403929, EPI_ISL_403930, EPI_ISL_403931                                                                                                                                                                                                                                                                                                                                                                                                                                                                                                                                                                                                                                                                                                                                                                                                                                                                                                                                                                                                 | see above                                                                                                                         | Institute of Pathogen Biology, Chinese Academy of Medical Sciences & Peking Union Medical College                                                                | Institute of Pathogen Biology, Chinese Academy of Medical Sciences & Peking Union Medical College                                                                | Chao Wu; Jianwei Wang; Lili Ren; Qi Jin; Yiwei Liu; Zhiqiang Wu; Zichun Xiang                                                                                                                                                                                                                 |
| EPI_ISL_408511, EPI_ISL_408512, EPI_ISL_408513, EPI_ISL_408514, EPI_ISL_408515                                                                                                                                                                                                                                                                                                                                                                                                                                                                                                                                                                                                                                                                                                                                                                                                                                                                                                                                                                                                 | see above                                                                                                                         | Institute of Viral Disease Control and Prevention, China CDC                                                                                                     | Institute of Viral Disease Control and Prevention, China CDC                                                                                                     | Beiwei Ye; Dayan Wang; George F. Gao; Guizhen Wu; Juan Song; Jun Han; Mengjie Yang; Peihua Niu; Peipei Liu; Roujian Lu; Shumei Zou; Wei Zhen; Weifeng Shi; Weimin Zhou; Wenbo Xu; Wenjie Tan; Wenwen Lei; William J. Liu; Xiang Zhao; Yingze Zhao; Yuchao Wu; Zhixiao Chen; Ziqian Xu         |
| EPI_ISL_455680                                                                                                                                                                                                                                                                                                                                                                                                                                                                                                                                                                                                                                                                                                                                                                                                                                                                                                                                                                                                                                                                 | Institute of pathogenic microbiology, Jiangsu Provincial Center for Disease Control and Prevention                                | Institute of pathogenic microbiology, Jiangsu Provincial Center for Disease Control and Prevention                                                               |                                                                                                                                                                  | Cui, L.                                                                                                                                                                                                                                                                                       |
| EPI_ISL_4515846, EPI_ISL_4515902                                                                                                                                                                                                                                                                                                                                                                                                                                                                                                                                                                                                                                                                                                                                                                                                                                                                                                                                                                                                                                               | see above                                                                                                                         | Jiangsu Provincial Center for Disease Control & Prevention                                                                                                       | Jiangsu Provincial Center for Disease Control & Prevention                                                                                                       | Fengcai Zhu; Kangchen Zhao; Lunbiao Cai; Lunbiao Cui ; kangchen zhao; Xiaojuan Zhu; Xiling Guo; fengcai zhu; xiaojuan zhu; xiling guo; ying chi; yiyue ge                                                                                                                                     |
| EPI_ISL_421237, EPI_ISL_421238, EPI_ISL_421239, EPI_ISL_421240, EPI_ISL_421241, EPI_ISL_421242, EPI_ISL_421243, EPI_ISL_421244, EPI_ISL_421245, EPI_ISL_421246, EPI_ISL_421247, EPI_ISL_421248, EPI_ISL_421249, EPI_ISL_421250, EPI_ISL_421251, EPI_ISL_421252, EPI_ISL_421253, EPI_ISL_421254, EPI_ISL_421256, EPI_ISL_421257, EPI_ISL_421258, EPI_ISL_421259, EPI_ISL_421260, EPI_ISL_421261, EPI_ISL_421262, EPI_ISL_455460, EPI_ISL_455461, EPI_ISL_455462, EPI_ISL_455463, EPI_ISL_455464, EPI_ISL_455465, EPI_ISL_455466, EPI_ISL_455467                                                                                                                                                                                                                                                                                                                                                                                                                                                                                                                                 | see above                                                                                                                         | Jiangxi Province Center for Disease Control and Prevention                                                                                                       | Jiangxi Province Center for Disease Control and Prevention                                                                                                       | Dajin Xiao; Fang Xiao; Gang Xu; JianXiong Li; Jun Zhou; ShiWen Liu; Tian Gong; XiaoQing Liu; Xin Ran; YanNi Zhang; Ying Xiong; Yong Shi                                                                                                                                                       |
| EPI_ISL_417420                                                                                                                                                                                                                                                                                                                                                                                                                                                                                                                                                                                                                                                                                                                                                                                                                                                                                                                                                                                                                                                                 | see above                                                                                                                         | Jiangxi province Center for Disease Control and Prevention                                                                                                       | Jiangxi province Center for Disease Control and Prevention                                                                                                       | Li jian Xiong                                                                                                                                                                                                                                                                                 |
| EPI_ISL_412459                                                                                                                                                                                                                                                                                                                                                                                                                                                                                                                                                                                                                                                                                                                                                                                                                                                                                                                                                                                                                                                                 | Jingzhou Center for Disease Control and Prevention                                                                                | Hubei Provincial Center for Disease Control and Prevention                                                                                                       |                                                                                                                                                                  | Bin Fang; Bo Yang; Bo Yu; Chunlin Mao; Faxian Zhan; Guojun Ye; Jie Hu; Jing Li; Junqiang Xu; Kun Cai; Linlin Liu; Maoyi Chen; Xiang Li; Xiao Yu; Xixiang Huo; Yongzhong Jiang.                                                                                                                |
| EPI_ISL_2811795, EPI_ISL_2811805                                                                                                                                                                                                                                                                                                                                                                                                                                                                                                                                                                                                                                                                                                                                                                                                                                                                                                                                                                                                                                               | see above                                                                                                                         | Jining Center for Disease Control and Prevention                                                                                                                 | Jining Center for Disease Control and Prevention                                                                                                                 | Jiao Bo-yan                                                                                                                                                                                                                                                                                   |
| EPI_ISL_411957                                                                                                                                                                                                                                                                                                                                                                                                                                                                                                                                                                                                                                                                                                                                                                                                                                                                                                                                                                                                                                                                 | Key Laboratory of Human Diseases, Comparative Medicine, Institute of Laboratory Animal Science                                    | Key Laboratory of Human Diseases, Comparative Medicine, Institute of Laboratory Animal Science                                                                   |                                                                                                                                                                  | Conghui, W.; Feifei, Q.; Fengdi, L.; Guanpeng, W.; Hong, G.; J. and Chuan, Q.; Jiangning, L.; Jing, X.; Lan, C.; Li, G.; Lili, R.; Linlin, B.; Mingya, L.; Pin, Y.; Qi, Qi, L.; Qiang, W.; Shunyi, W.; Shuran, G.; Wei, D.; Xinming, W.; Yajin, Q.; Yan, X.; Yanfeng, X.; Ying, W.; Zhiqi, S. |
| EPI_ISL_414510                                                                                                                                                                                                                                                                                                                                                                                                                                                                                                                                                                                                                                                                                                                                                                                                                                                                                                                                                                                                                                                                 | Key Laboratory of Medical Molecular Virology (MOE/NHC/CAMS), School of Basic Medicine, Shanghai Medical College, Fudan University | Key Laboratory of Medical Molecular Virology (MOE/NHC/CAMS), School of Basic Medicine, Shanghai Medical College, Fudan University                                |                                                                                                                                                                  | Cai, X.; Chen, H.; Fang, F.; Feng, F.; Fu, C.; Gu, C.; Han, W.; Li, C.; Qu, D.; Song, W.; Sun, Z.; Teng, Z.; Wang, Y.; Xie, Xu, W.; Y. and Yuan, Z.; Ye, R.; Yi, Z.; Zhang, R.; Zhang, X.; Zhou, Y.; Zhu, Y.                                                                                  |
| EPI_ISL_452327, EPI_ISL_452328, EPI_ISL_452329, EPI_ISL_452330, EPI_ISL_452331, EPI_ISL_452332, EPI_ISL_452333, EPI_ISL_452334, EPI_ISL_452335, EPI_ISL_452336, EPI_ISL_452337, EPI_ISL_452338, EPI_ISL_452339, EPI_ISL_452340, EPI_ISL_452341, EPI_ISL_452342, EPI_ISL_452343, EPI_ISL_452344, EPI_ISL_452345, EPI_ISL_452346, EPI_ISL_452347, EPI_ISL_452348, EPI_ISL_452349, EPI_ISL_452350, EPI_ISL_452351, EPI_ISL_452352, EPI_ISL_452353, EPI_ISL_452354, EPI_ISL_452355, EPI_ISL_452356, EPI_ISL_452357, EPI_ISL_452358, EPI_ISL_452359, EPI_ISL_452360, EPI_ISL_452361, EPI_ISL_452362, EPI_ISL_452363, EPI_ISL_452364                                                                                                                                                                                                                                                                                                                                                                                                                                                 | see above                                                                                                                         | Laboratory of Infectious Diseases Center of Beijing Ditan Hospital                                                                                               | Laboratory of Infectious Diseases Center of Beijing Ditan Hospital                                                                                               | Chengjie Jie; Fengting Yu; Linghang Wang; Liting Yan; Siyuan Yang; Yunxia Tang                                                                                                                                                                                                                |
| EPI_ISL_1068682                                                                                                                                                                                                                                                                                                                                                                                                                                                                                                                                                                                                                                                                                                                                                                                                                                                                                                                                                                                                                                                                | Micrbiological Laboratory                                                                                                         | Micrbiological Laboratory,Lu'an Center for Disease Control and Prevention                                                                                        |                                                                                                                                                                  | Chang Hongwei; Chen Beilei; Chen Zhichao; Gao Dawei; Li Zhaoyang; Yang Wei; Zhang Feng; Zhang Limei; Zhang Qin; Zhu Rui                                                                                                                                                                       |
| EPI_ISL_1069173                                                                                                                                                                                                                                                                                                                                                                                                                                                                                                                                                                                                                                                                                                                                                                                                                                                                                                                                                                                                                                                                | Micrbiological Laboratory,Lu'an Center for Disease Control and Prevention                                                         | Micrbiological Laboratory,Lu'an Center for Disease Control and Prevention                                                                                        |                                                                                                                                                                  | Chang Hongwei; Chen Beilei; Chen Zhichao; Gao Dawei; Li Zhaoyang; Yang Wei; Zhang Feng; Zhang Limei; Zhang Qin; Zhu Rui                                                                                                                                                                       |
| EPI_ISL_1069192                                                                                                                                                                                                                                                                                                                                                                                                                                                                                                                                                                                                                                                                                                                                                                                                                                                                                                                                                                                                                                                                | Micrbiological Laboratory,Lu'an Center for Disease Control and Prevention                                                         | No.409,Gaocheng Middle Road,Lu'an City,Anhui Province                                                                                                            |                                                                                                                                                                  | Chang Hongwei; Chen Beilei; Chen Zhichao; Gao Dawei; Li Zhaoyang; Yang Wei; Zhang Feng; Zhang Limei; Zhang Qin; Zhu Rui                                                                                                                                                                       |
| EPI_ISL_1069193                                                                                                                                                                                                                                                                                                                                                                                                                                                                                                                                                                                                                                                                                                                                                                                                                                                                                                                                                                                                                                                                | Micrbiology Laboratory,Lu'an Center for Disease Control and Prevention                                                            | Micrbiology Laboratory,Lu'an Center for Disease Control and Prevention                                                                                           |                                                                                                                                                                  | Chang Hongwei; Chen Beilei; Chen Zhichao; Gao Dawei; Li Zhaoyang; Yang Wei; Zhang Feng; Zhang Limei; Zhang Qin; Zhu Rui                                                                                                                                                                       |
| EPI_ISL_1068593                                                                                                                                                                                                                                                                                                                                                                                                                                                                                                                                                                                                                                                                                                                                                                                                                                                                                                                                                                                                                                                                | Microbiological Laboratory                                                                                                        | Microbiological Laboratory,Lu'an Center for                                                                                                                      |                                                                                                                                                                  | Chang Hongwei; Chen Beilei; Chen Zhichao; Gao Dawei; Li Zhaoyang; Yang Wei; Zhang Feng; Zhang Limei; Zhang Qin; Zhu Rui                                                                                                                                                                       |



|                                                                                                                                                                                                                                                                                                                                                                                                                                                                                                                              |                                                                                                                                                                                                                                |                                                                                                                                                                                                                                |                                                                                               |                                                                                                                                                                                                                                                                                                                                                                                                                                                                                                                                                                                                                                                                                 |
|------------------------------------------------------------------------------------------------------------------------------------------------------------------------------------------------------------------------------------------------------------------------------------------------------------------------------------------------------------------------------------------------------------------------------------------------------------------------------------------------------------------------------|--------------------------------------------------------------------------------------------------------------------------------------------------------------------------------------------------------------------------------|--------------------------------------------------------------------------------------------------------------------------------------------------------------------------------------------------------------------------------|-----------------------------------------------------------------------------------------------|---------------------------------------------------------------------------------------------------------------------------------------------------------------------------------------------------------------------------------------------------------------------------------------------------------------------------------------------------------------------------------------------------------------------------------------------------------------------------------------------------------------------------------------------------------------------------------------------------------------------------------------------------------------------------------|
| EPI_ISL_497950                                                                                                                                                                                                                                                                                                                                                                                                                                                                                                               | Shaoxing CDC                                                                                                                                                                                                                   | Zhejiang Provincial Center for Disease Control and Prevention                                                                                                                                                                  | Haiyan Mao; Hao Yan; Junhang Pan; Wen Shi; Xiuyu Lou; Yanjun Zhang; Yi Sun; Yin Chen; Zhen Li |                                                                                                                                                                                                                                                                                                                                                                                                                                                                                                                                                                                                                                                                                 |
| EPI_ISL_463889, EPI_ISL_463894, EPI_ISL_463895, EPI_ISL_463896, EPI_ISL_463897, EPI_ISL_463898, EPI_ISL_463899, EPI_ISL_463900, EPI_ISL_463901, EPI_ISL_463902                                                                                                                                                                                                                                                                                                                                                               | see above                                                                                                                                                                                                                      | Shaoxing Center for Disease Control and Prevention                                                                                                                                                                             | Department of Pathology and Laboratory Medicine, University of California Los Angeles         | Evann E. Hilt; Fan Li; Huan Wu; JiLing Wang; Jialiang Tang; Jinkun Chen; QinChao Zhang; Shangxin Yang; Yifang Wang; Zhuojing Jiang; Ziqin Li                                                                                                                                                                                                                                                                                                                                                                                                                                                                                                                                    |
| EPI_ISL_2405168, EPI_ISL_2405169, EPI_ISL_2405170, EPI_ISL_2405171, EPI_ISL_2405172, EPI_ISL_2405173, EPI_ISL_2405174, EPI_ISL_2405175, EPI_ISL_2405176, EPI_ISL_2405177, EPI_ISL_2426143, EPI_ISL_2432955, EPI_ISL_2432956, EPI_ISL_2432957, EPI_ISL_2438545, EPI_ISL_2500849, EPI_ISL_2921027, EPI_ISL_2931272, EPI_ISL_2931273, EPI_ISL_2931274, EPI_ISL_2931275, EPI_ISL_2931276, EPI_ISL_2931277, EPI_ISL_2931278, EPI_ISL_2931279, EPI_ISL_2931280, EPI_ISL_2931281, EPI_ISL_2931282, EPI_ISL_2931283, EPI_ISL_2931284 | see above                                                                                                                                                                                                                      | Shenzhen Center for Disease Control and Prevention                                                                                                                                                                             | National Institute for Viral Disease Control and Prevention, China CDC                        | Bo Peng; Can Zhu; ChunLi Wu; Chunli Wu; DaNa Huang; Dana Huang; Fan Yang; Fan Yang and Yaqing He; Fang Yang; Hai-Long Zhang; HaiLong Zhang; Hang Zhang; JianCheng Chen; Jiancheng Chen; Jun Meng; Kai Nie; Le Zuo; Ling-Hong Xiong; LingHong Xiong; Long Chen; Peihua Niu; Qinglu Lu; Qingju Lu; RenLi Zhang; Renli Zhang; ShaoYu Deng; Shaoyu Deng; Shaoyu Deng and Yaqing He; ShiMin Li; ShiSong Fang; Shimin Li; Shisong Fang; WeiHua Wu; Weihua Wu; Xiang Zhao; XiaoLiang Xiao; Xiaoliang Xiao; XinYi Wei; Xinyi Wei; YaQing He; Yaqing He; Yenan Feng; Yijun Tang; Yijun Tang; Ying Sun; Yue Li; ZiDan Lin; Zidan Lin and Yaqin He; Zidan Lin and Yaqing He; and Yaqing He |
| EPI_ISL_406593, EPI_ISL_406594, EPI_ISL_406595                                                                                                                                                                                                                                                                                                                                                                                                                                                                               | Shenzhen Key Laboratory of Pathogen and Immunity, National Clinical Research Center for Infectious Disease, Shenzhen Third People's Hospital                                                                                   | Shenzhen Key Laboratory of Pathogen and Immunity, National Clinical Research Center for Infectious Disease, Shenzhen Third People's Hospital                                                                                   |                                                                                               | Chengguang Shen; Haixia Zheng; Li Xing; Yang Yang; Yingxia Liu; Zhixiang Xu                                                                                                                                                                                                                                                                                                                                                                                                                                                                                                                                                                                                     |
| EPI_ISL_406592                                                                                                                                                                                                                                                                                                                                                                                                                                                                                                               | Shenzhen Third People's Hospital                                                                                                                                                                                               | Shenzhen Key Laboratory of Pathogen and Immunity, National Clinical Research Center for Infectious Disease,Shenzhen Third People's Hospital                                                                                    |                                                                                               | Chengguang Shen; Haixia Zheng; Li Xing; Yang Yang; Yingxia Liu; Zhixiang Xu                                                                                                                                                                                                                                                                                                                                                                                                                                                                                                                                                                                                     |
| EPI_ISL_410721, EPI_ISL_471461, EPI_ISL_471462, EPI_ISL_471463, EPI_ISL_471464, EPI_ISL_471465, EPI_ISL_471466, EPI_ISL_471467, EPI_ISL_471468, EPI_ISL_471469, EPI_ISL_471470                                                                                                                                                                                                                                                                                                                                               | see above                                                                                                                                                                                                                      | South China Agricultural University                                                                                                                                                                                            | South China Agricultural University                                                           | Lihua Xiao; Wu Chen; Yongyi Shen                                                                                                                                                                                                                                                                                                                                                                                                                                                                                                                                                                                                                                                |
| EPI_ISL_3127444, EPI_ISL_3127445                                                                                                                                                                                                                                                                                                                                                                                                                                                                                             | State Key Laboratory for Diagnosis and Treatment of Infectious Diseases, National Clinical Research Center for Infectious Diseases, First Affiliated Hospital, Zhejiang University School of Medicine, Hangzhou, China. 310003 | State Key Laboratory for Diagnosis and Treatment of Infectious Diseases, National Clinical Research Center for Infectious Diseases, First Affiliated Hospital, Zhejiang University School of Medicine, Hangzhou, China. 310003 |                                                                                               | Changzhong Jin; Danrong Shi; Fumin Liu; Haibo Wu; Hangping Yao; Keda Chen; Keda Chen , Zhigang Wu; Lanjuan Li; Linfang Cheng; Min Zheng; Nanping Wu; Shibo Li; Tianhao Weng; Tianhao Weng , Danrong Shi , Linfang Cheng; Xiangyun Lu; Zhigang Wu                                                                                                                                                                                                                                                                                                                                                                                                                                |
| EPI_ISL_416044, EPI_ISL_416046, EPI_ISL_416047, EPI_ISL_416425, EPI_ISL_416473, EPI_ISL_416474, EPI_ISL_418990, EPI_ISL_418991                                                                                                                                                                                                                                                                                                                                                                                               | see above                                                                                                                                                                                                                      | State Key Laboratory for Diagnosis and Treatment of Infectious Diseases, National Clinical Research Center for Infectious Diseases, First Affiliated Hospital, Zhejiang University School of Medicine, Hangzhou, China 310003  |                                                                                               | Changzhong Jin; Chao Jiang; Fumin Liu; Haibo Wu; Hangping Yao; Lanjuan Li; Linfang Cheng; Min Zheng; Nanping Wu; Xiangyun Lu; Zhigang Wu                                                                                                                                                                                                                                                                                                                                                                                                                                                                                                                                        |
| EPI_ISL_415709, EPI_ISL_415711, EPI_ISL_416042                                                                                                                                                                                                                                                                                                                                                                                                                                                                               | State Key Laboratory for Diagnosis and Treatment of Infectious Diseases, National Clinical Research Center for Infectious Diseases, First Affiliated Hospital, Zhejiang University School of Medicine, Hangzhou, China. 310003 | State Key Laboratory for Diagnosis and Treatment of Infectious Diseases, National Clinical Research Center for Infectious Diseases, First Affiliated Hospital, Zhejiang University School of Medicine, Hangzhou, China. 310003 |                                                                                               | Changzhong Jin; Chao Jiang; Fumin Liu; Haibo Wu; Hangping Yao; Lanjuan Li; Linfang Cheng; Min Zheng; Nanping Wu; Xiangyun Lu; Zhigang Wu                                                                                                                                                                                                                                                                                                                                                                                                                                                                                                                                        |
| EPI_ISL_421531                                                                                                                                                                                                                                                                                                                                                                                                                                                                                                               | State Key Laboratory of Agricultural Microbiology                                                                                                                                                                              | State Key Laboratory of Agricultural Microbiology                                                                                                                                                                              |                                                                                               | Meilin Jin                                                                                                                                                                                                                                                                                                                                                                                                                                                                                                                                                                                                                                                                      |
| EPI_ISL_470802                                                                                                                                                                                                                                                                                                                                                                                                                                                                                                               | State Key Laboratory of Agriculture Microbiology                                                                                                                                                                               | State Key Laboratory of Agriculture Microbiology, Huazhong Agric                                                                                                                                                               |                                                                                               | Zhong Zou                                                                                                                                                                                                                                                                                                                                                                                                                                                                                                                                                                                                                                                                       |
| EPI_ISL_1615558                                                                                                                                                                                                                                                                                                                                                                                                                                                                                                              | State Key Laboratory of Agriculture Microbiology                                                                                                                                                                               | State Key Laboratory of Agriculture Microbiology, Huazhong Agric Laboratory of Animal Virology, College of Veterinary Medicine                                                                                                 |                                                                                               | Kun Huang and Meilin Jin                                                                                                                                                                                                                                                                                                                                                                                                                                                                                                                                                                                                                                                        |
| EPI_ISL_1655937                                                                                                                                                                                                                                                                                                                                                                                                                                                                                                              | State Key Laboratory of Emerging Infectious Diseases, The University of Hong Kong                                                                                                                                              | State Key Laboratory of Emerging Infectious Diseases, The University of Hong Kong                                                                                                                                              |                                                                                               | Huachen Zhu; Jia Wang; Lifeng Li; Yi Guan; Yiu Man Cheung                                                                                                                                                                                                                                                                                                                                                                                                                                                                                                                                                                                                                       |
| EPI_ISL_2779638, EPI_ISL_2779639                                                                                                                                                                                                                                                                                                                                                                                                                                                                                             | State Key Laboratory of Emerging Infectious Diseases, The University of Hong Kong                                                                                                                                              | The University of Hong Kong                                                                                                                                                                                                    |                                                                                               | Huachen Zhu; Lifeng Li; Xianfan Wu; Yi Guan; Yiu Man Cheung                                                                                                                                                                                                                                                                                                                                                                                                                                                                                                                                                                                                                     |
| EPI_ISL_610156                                                                                                                                                                                                                                                                                                                                                                                                                                                                                                               | State Key Laboratory of Genetic Resources and Evolution, Kunming Institute of Zoology, Chinese Academy of Sciences                                                                                                             | State Key Laboratory of Genetic Resources and Evolution, Kunming Institute of Zoology, Chinese Academy of Sciences                                                                                                             |                                                                                               | Hang Liu; Jian-Bo Li; Min-Sheng Peng; Ting-Ting Yin; Ya-Ping Zhang                                                                                                                                                                                                                                                                                                                                                                                                                                                                                                                                                                                                              |
| EPI_ISL_444273                                                                                                                                                                                                                                                                                                                                                                                                                                                                                                               | State Key Laboratory of Respiratory Disease, National Clinical Research Center for Respiratory Disease, Guangzhou Institute of Respiratory Health, the First Affiliated Hospital of Guangzhou Medical University               | State Key Laboratory of Respiratory Disease, National Clinical Research Center for Respiratory Disease, Guangzhou Institute of Respiratory Health, the First Affiliated Hospital of Guangzhou Medical University               |                                                                                               | Huang; J. and Zhao, J.; Shi, Y.; Sun, J.; Zheng, K.                                                                                                                                                                                                                                                                                                                                                                                                                                                                                                                                                                                                                             |
| EPI_ISL_414663, EPI_ISL_414686, EPI_ISL_414688, EPI_ISL_414689, EPI_ISL_414690, EPI_ISL_414691, EPI_ISL_414692                                                                                                                                                                                                                                                                                                                                                                                                               | see above                                                                                                                                                                                                                      | State Key Laboratory of Respiratory Disease, National Clinical Research Center for Respiratory Disease, Guangzhou Institute of Respiratory Health, the First Affiliated Hospital of Guangzhou Medical University               | The First Affiliated Hospital of Guangzhou Medical University & BGI-Shenzhen                  | Zhao et al                                                                                                                                                                                                                                                                                                                                                                                                                                                                                                                                                                                                                                                                      |
| EPI_ISL_414687                                                                                                                                                                                                                                                                                                                                                                                                                                                                                                               | State Key Laboratory of Respiratory Disease, National Clinical Research Center for Respiratory Disease, Guangzhou Institute of Respiratory Health, the First Affiliated Hospital of Guangzhou Medical University               |                                                                                                                                                                                                                                | the First Affiliated Hospital of Guangzhou Medical University & BGI-Shenzhen                  | Zhao et al                                                                                                                                                                                                                                                                                                                                                                                                                                                                                                                                                                                                                                                                      |
| EPI_ISL_406716, EPI_ISL_406717                                                                                                                                                                                                                                                                                                                                                                                                                                                                                               | State Key Laboratory of Virology, Wuhan University                                                                                                                                                                             | State Key Laboratory of Virology, Wuhan University                                                                                                                                                                             |                                                                                               | Chen, L.; Chen, Y.; K. and Liu, Y.; Lan; Li, Y.; Liu, F.; Liu, W.; Mei, Y.; Shi, M.; Sun, Z.; Wu, K.; Wu, W.; Xu, K.; Ye, G.; Zhang, Q.; Zhang, W.                                                                                                                                                                                                                                                                                                                                                                                                                                                                                                                              |
| EPI_ISL_529149,                                                                                                                                                                                                                                                                                                                                                                                                                                                                                                              | Technology Centre, Guangzhou                                                                                                                                                                                                   | Technology Centre, Guangzhou                                                                                                                                                                                                   |                                                                                               | Dai, J.; Huang, J.; Huang, S.; Li, X.; Shi, Y.; Sun, F.; Sun, J.; Wang, Y.; Zhang, Z.; Zheng, K.; Zhu, .; Zhuang, Z.                                                                                                                                                                                                                                                                                                                                                                                                                                                                                                                                                            |



|                                                                                                                                                                                                |                                                                                                                    |                                                                                                                                                                |                                                                                                                                                                                                                                                                                                                                                    |                                                                                                                                                                 |                                                           |
|------------------------------------------------------------------------------------------------------------------------------------------------------------------------------------------------|--------------------------------------------------------------------------------------------------------------------|----------------------------------------------------------------------------------------------------------------------------------------------------------------|----------------------------------------------------------------------------------------------------------------------------------------------------------------------------------------------------------------------------------------------------------------------------------------------------------------------------------------------------|-----------------------------------------------------------------------------------------------------------------------------------------------------------------|-----------------------------------------------------------|
| EPI_ISL_422425                                                                                                                                                                                 | Zhejiang Provincial Center for Disease Control and Prevention                                                      | Disease Control and Prevention                                                                                                                                 |                                                                                                                                                                                                                                                                                                                                                    |                                                                                                                                                                 | Yanjun Zhang; Yi Sun                                      |
| EPI_ISL_1911195, EPI_ISL_1911196, EPI_ISL_1911197, EPI_ISL_1911250                                                                                                                             | Zhejiang Provincial Center for Disease Control and Prevention<br>Zhoushan Center for Disease Prevention and Contol | Zhejiang Province Center of Disease Control and prevention                                                                                                     |                                                                                                                                                                                                                                                                                                                                                    |                                                                                                                                                                 | Bing WU; Hongling Wang; Yanjun Zhang                      |
| EPI_ISL_408479                                                                                                                                                                                 | Zhongxian Center for Disease Control and Prevention                                                                | Chongqing Municipal Center for Disease Control and Prevention                                                                                                  |                                                                                                                                                                                                                                                                                                                                                    | Chen Shuang; Li Qin; Ling Hua; Rong Rong; Su Kun; Tan Zhang                                                                                                     | Ping; Tang Wenge; Tang Yun; Ye Sheng; Yu zhen; Zhang Hong |
| EPI_ISL_467430                                                                                                                                                                                 | Zoonotic and Exotic infection Diseases Division                                                                    | Zoontic and Exotic infection Diseases Division                                                                                                                 |                                                                                                                                                                                                                                                                                                                                                    |                                                                                                                                                                 | Jinlang Wang; Zhigao Bu                                   |
| EPI_ISL_459909                                                                                                                                                                                 | Zoonotic and Exotic infection Diseases Division, Harbin Veterinary Research Institute, CAAS                        | Zoonotic and Exotic infection Diseases Division, Harbin Veterinary Reserarch Institute, CAAS                                                                   |                                                                                                                                                                                                                                                                                                                                                    |                                                                                                                                                                 | Jinliang Wang; Zhigao Bu                                  |
| EPI_ISL_459910                                                                                                                                                                                 | Zoonotic and Exotic infection Diseases Division, Harbin Veterinary Research Institute, CAAS                        | Zoonotic and Exotic infection Diseases Division, Harbin Veterinary Resrarch Institute, CAAS                                                                    | Chong Wang; Dan Shan; Gongxun Zhong; Jinliang Wang; Jinying Ge; Lei Shuai; Renqiang Liu; Xianfeng Zhang; Xijun He; Xijun Wang; Zhigao Bu; Zhiyuan Wen; Ziruo Sun                                                                                                                                                                                   |                                                                                                                                                                 |                                                           |
| EPI_ISL_450417, see above                                                                                                                                                                      | EPI_ISL_450418, unknown                                                                                            | EPI_ISL_450419, Anhui Provincial Center for Disease Control                                                                                                    | EPI_ISL_450420, EPI_ISL_450421, EPI_ISL_450422, EPI_ISL_450423, EPI_ISL_450424, EPI_ISL_450425, EPI_ISL_450426                                                                                                                                                                                                                                     | Chen, Q.; Ge, Y.; Gong, L.; He, J.; He, L.; Hou, S.; Jiang, L.; Li, W.; Liu, J.; Liu, Z.; Lu, S.; Sa, N.; Shi, Y.; Sun, Y.; Wu, J.; Yu, J.; Yuan, Y.; Zhang, Z. |                                                           |
| EPI_ISL_450416                                                                                                                                                                                 | unknown                                                                                                            | Anhui Provincial Center for Disease Control and Prevention                                                                                                     |                                                                                                                                                                                                                                                                                                                                                    | Chen, Q.; Ge, Y.; Gong, L.; He, J.; He, L.; Hou, S.; Jiang, L.; Li, W.; Liu, J.; Liu, Z.; Lu, S.; Sa, N.; Shi, Y.; Sun, Y.; Wu, J.; Yu, J.; Yuan, Y.; Zhang, Z. |                                                           |
| EPI_ISL_450500, EPI_ISL_450501, EPI_ISL_450502, EPI_ISL_450503, EPI_ISL_450504                                                                                                                 | unknown                                                                                                            | CAS Key Laboratory of Special Pathogens and Biosafety and Center for Emerging Infectious Diseases                                                              |                                                                                                                                                                                                                                                                                                                                                    | Lin, H.; Shi, Z.; Si, H.; Xie, S.; Zhou, P.; Zhu, Y.                                                                                                            |                                                           |
| EPI_ISL_512766, EPI_ISL_512767, EPI_ISL_512768, EPI_ISL_512769, EPI_ISL_512770, EPI_ISL_512771                                                                                                 | unknown                                                                                                            | Center for Precision Medicine, Meizhou People's Hospital (Huangtang Hospital)                                                                                  |                                                                                                                                                                                                                                                                                                                                                    | Guo, X.; Huang, Q.; Wu, H.; Yu, Z.                                                                                                                              |                                                           |
| EPI_ISL_450428, see above                                                                                                                                                                      | EPI_ISL_450429, EPI_ISL_450430, unknown                                                                            | EPI_ISL_450431, EPI_ISL_450432, EPI_ISL_450433, EPI_ISL_450434, EPI_ISL_450435, EPI_ISL_450436, EPI_ISL_450438, EPI_ISL_450439, EPI_ISL_450440, EPI_ISL_450441 |                                                                                                                                                                                                                                                                                                                                                    | Yan, Y.                                                                                                                                                         |                                                           |
| EPI_ISL_455683, see above                                                                                                                                                                      | EPI_ISL_455684, unknown                                                                                            | EPI_ISL_455685, EPI_ISL_455686, EPI_ISL_455687, EPI_ISL_455688, EPI_ISL_455689, EPI_ISL_455690, EPI_ISL_455691, EPI_ISL_455692, EPI_ISL_455693, EPI_ISL_468726 |                                                                                                                                                                                                                                                                                                                                                    |                                                                                                                                                                 |                                                           |
| EPI_ISL_449476, EPI_ISL_449477, EPI_ISL_449478, EPI_ISL_449479, EPI_ISL_449480, EPI_ISL_449481, EPI_ISL_449482, EPI_ISL_449483, EPI_ISL_449484, EPI_ISL_449485, EPI_ISL_449486, EPI_ISL_449487 | unknown                                                                                                            | Department of Microbiology                                                                                                                                     | Bao, L.; Cai, F.; Deng, W.; Gao, H.; Gao, Q.; Ge, X.; Gong, X.; Hu, Y.; Jiang, D.; Jiang, L.; Kan, B.; Li, C.; Li, J.; Li, Y.; Liu, J.; Lou, X.; Lu, J.; Lv, Z.; Mao, H.; Peng, H.; Qi, Z.; Qin, C.; Shi, W.; Sun, Y.; Tang, H.; Wang, L.; Wang, N.; Wang, X.; Wu, D.; Xu, K.; Yang, M.; Yin, W.; Yin, Y.; Zhang, H.; Zhang, Y.; Zhao, P.; Zhu, L. |                                                                                                                                                                 |                                                           |
| see above                                                                                                                                                                                      | unknown                                                                                                            | Department of Respiratory and Critical Care                                                                                                                    | Bai, X.; Chang, Y.; Deng, T.; Gao, Y.; He, Y.; Jiang, N.; Liang, L.; Liu, L.; Liu, W.; Ma, Ma, L.; Ma, X.; Pan, T.; Shi, H.; W.L. and Gao, Z.; Wang, G.; Wang, X.; Wei, X.; Xu, Y.; Yang, B.; Yang, D.; Zhai, B.; Zhang, J.; Zhang, Z.; Zheng, Y.; Zhou, Q.                                                                                        |                                                                                                                                                                 |                                                           |
| EPI_ISL_411949                                                                                                                                                                                 | unknown                                                                                                            | Pathogenic microbiology laboratory , Huashan Hospital, Fudan University                                                                                        |                                                                                                                                                                                                                                                                                                                                                    | Hao-Cheng Zhang; Jing-Wen Ai; Teng Xu; Wen-Hong Zhang; Yi Zhang                                                                                                 |                                                           |
| EPI_ISL_412044, EPI_ISL_412046                                                                                                                                                                 | unknown                                                                                                            | University of Hong Kong-Shenzhen Hospital                                                                                                                      | C.C.-Y.; C.K.-M. and Yuen; Cai; Chan; Chen, H.; Cheng; Chu, H.; H.W.; Hui; Ip; J.D.; J.F.-W.; J.P.; K.H.; K.K.-W.; K.Y.; Kok; Liu, J.; Lo; Poon; R.W.-S.; S.K.-F.; To; Tsai; V.C.-C.; V.K.-M.; W.M.; Xing, F.; Yang, J.; Yip; Yuan, S.                                                                                                             |                                                                                                                                                                 |                                                           |

We gratefully acknowledge the following Authors from the Originating laboratories responsible for obtaining the specimens, as well as the Submitting laboratories where the genome data were generated and shared via GISAID, on which this research is based.

All Submitters of data may be contacted directly via [www.gisaid.org](http://www.gisaid.org)

Authors are sorted alphabetically.

| Accession ID                                                                                                                                                                                                                                                                                                                                                                                                                                                                                                                                                                    | Originating Laboratory                                                                                                                                                                                                                                        | Submitting Laboratory                                                                                                                                                                                                     | Authors                                                                                                                                                                                             |
|---------------------------------------------------------------------------------------------------------------------------------------------------------------------------------------------------------------------------------------------------------------------------------------------------------------------------------------------------------------------------------------------------------------------------------------------------------------------------------------------------------------------------------------------------------------------------------|---------------------------------------------------------------------------------------------------------------------------------------------------------------------------------------------------------------------------------------------------------------|---------------------------------------------------------------------------------------------------------------------------------------------------------------------------------------------------------------------------|-----------------------------------------------------------------------------------------------------------------------------------------------------------------------------------------------------|
| EPI_ISL_2343208, EPI_ISL_2343209, EPI_ISL_2343210, EPI_ISL_2343211, EPI_ISL_2343212, EPI_ISL_2343213, EPI_ISL_2343214, EPI_ISL_2343215, EPI_ISL_2343216, EPI_ISL_2343217, EPI_ISL_2343218, EPI_ISL_2343219, EPI_ISL_2343220, EPI_ISL_2343221, EPI_ISL_2343222, EPI_ISL_2343223, EPI_ISL_2343224, EPI_ISL_2343251, EPI_ISL_2343252, EPI_ISL_2501020, EPI_ISL_2501021, EPI_ISL_2501022, EPI_ISL_2501023, EPI_ISL_2501024, EPI_ISL_2501025, EPI_ISL_2501026, EPI_ISL_3797866                                                                                                       |                                                                                                                                                                                                                                                               |                                                                                                                                                                                                                           |                                                                                                                                                                                                     |
| see above                                                                                                                                                                                                                                                                                                                                                                                                                                                                                                                                                                       | Banteay Meanchey Rapid Response Team                                                                                                                                                                                                                          | Virology Unit, Institut Pasteur du Cambodge                                                                                                                                                                               | Cecile Troupin; Chau Darapheak; Chin Savuth; Erik A Karlsson; Jurre Y Siegers; Kraing Sidonn; Leakhena Pum; Ly Sovann; Sophoannadeth Rath; Veasna Duong; Yi Sengdoeurn                              |
| EPI_ISL_2801892, EPI_ISL_2801893, EPI_ISL_2801894, EPI_ISL_3031475, EPI_ISL_3031476, EPI_ISL_3031477, EPI_ISL_3031478, EPI_ISL_3031479, EPI_ISL_3031480, EPI_ISL_3031481, EPI_ISL_3031482, EPI_ISL_3045558, EPI_ISL_3045559, EPI_ISL_3045560, EPI_ISL_3045561, EPI_ISL_3118366, EPI_ISL_3118367, EPI_ISL_3118368, EPI_ISL_3118369                                                                                                                                                                                                                                               | see above                                                                                                                                                                                                                                                     | Banteay Meanchey Regional Laboratory                                                                                                                                                                                      | Cecile Troupin; Chau Darapheak; Chin Savuth; Erik A Karlsson; Jurre Y Siegers; Kraing Sidonn; Leakhena Pum; Ly Sovann; Sophoannadeth Rath; Veasna Duong; Yi Sengdoeurn                              |
| EPI_ISL_2231565, EPI_ISL_2231566, EPI_ISL_2231567, EPI_ISL_2231568, EPI_ISL_2231569, EPI_ISL_2343225, EPI_ISL_2343226, EPI_ISL_2406458, EPI_ISL_2406459, EPI_ISL_2406460, EPI_ISL_2501027, EPI_ISL_2501028                                                                                                                                                                                                                                                                                                                                                                      | see above                                                                                                                                                                                                                                                     | Battambang Provincial Laboratory                                                                                                                                                                                          | Cecile Troupin; Chau Darapheak; Chiek Sivhour; Chin Savuth; Erik A Karlsson; Jurre Y Siegers; Kraing Sidonn; Leakhena Pum; Ly Sovann; Veasna Duong; Yi Sengdoeurn                                   |
| EPI_ISL_2801895, EPI_ISL_3045567, EPI_ISL_3797867, EPI_ISL_3797868, EPI_ISL_3983623                                                                                                                                                                                                                                                                                                                                                                                                                                                                                             | Battambang Rapid Response Team                                                                                                                                                                                                                                | Virology Unit, Institut Pasteur du Cambodge                                                                                                                                                                               | Cecile Troupin; Chau Darapheak; Chin Savuth; Erik A Karlsson; Jurre Y Siegers; Kraing Sidonn; Leakhena Pum; Ly Sovann; Sophoannadeth Rath; Veasna Duong; Yi Sengdoeurn                              |
| EPI_ISL_3031483, EPI_ISL_3031484, EPI_ISL_3045562, EPI_ISL_3045563, EPI_ISL_3045564, EPI_ISL_3118370, EPI_ISL_3118371, EPI_ISL_3118372                                                                                                                                                                                                                                                                                                                                                                                                                                          | see above                                                                                                                                                                                                                                                     | Battambang Repid Response Team                                                                                                                                                                                            | Cecile Troupin; Chau Darapheak; Chin Savuth; Erik A Karlsson; Kraing Sidonn; Leakhena Pum; Ly Sovann; Sophoannadeth Rath; Veasna Duong; Yi Sengdoeurn                                               |
| EPI_ISL_1096139, EPI_ISL_1096140, EPI_ISL_1096347, EPI_ISL_1096348, EPI_ISL_1098602, EPI_ISL_1098603, EPI_ISL_1098604, EPI_ISL_1098605, EPI_ISL_1532800, EPI_ISL_1532803, EPI_ISL_1532812, EPI_ISL_2106264, EPI_ISL_2106265, EPI_ISL_2106266, EPI_ISL_2106267, EPI_ISL_2106268, EPI_ISL_2106269, EPI_ISL_2106270, EPI_ISL_2106271                                                                                                                                                                                                                                               | see above                                                                                                                                                                                                                                                     | Cambodian National Public Health Laboratory, National Institute of Public Health                                                                                                                                          | Cecile Troupin; Chau Darapheak; Chin Savuth; Erik A Karlsson; Jurre Y Siegers; Kraing Sidonn; Leakhena Pum; Ly Sovann; Sokhoun Yann; Teyputita Ou; Veasna Duong; Yi Sengdoeurn                      |
| EPI_ISL_956385, EPI_ISL_956386, EPI_ISL_956387, EPI_ISL_956388, EPI_ISL_956389, EPI_ISL_956390, EPI_ISL_956391, EPI_ISL_956392, EPI_ISL_956393, EPI_ISL_956394, EPI_ISL_956395, EPI_ISL_956396, EPI_ISL_956397, EPI_ISL_956398, EPI_ISL_956399, EPI_ISL_956400, EPI_ISL_956401                                                                                                                                                                                                                                                                                                  | see above                                                                                                                                                                                                                                                     | Isolation - Virology Unit, Institut Pasteur du Cambodge; Sequencing - US National Institute of Allergy and Infectious Diseases Cambodia, US Naval Medical Research Unit -2, Cambodia National Institute for Public Health | Chau Darapheak; Chin Savuth; Erik A Karlsson; Jennifer Bohl; Jessica Manning; Jose A Garcia-Rivera; Kraing Sidonn; Ly Sovann; Sophana Chea; Sreyngim Lay; Veasna Duong; Vireak Heang; Yi Sengdoeurn |
| EPI_ISL_956384                                                                                                                                                                                                                                                                                                                                                                                                                                                                                                                                                                  | Isolation - Virology Unit, Institut Pasteur du Cambodge; Sequencing - US National Institute of Allergy and Infectious Diseases Cambodia, US Naval Medical Research Unit -2, National Public Health Laboratory, National Institute for Public Health, Cambodia | Virology Unit, Institut Pasteur du Cambodge                                                                                                                                                                               | Chau Darapheak; Chin Savuth; Erik A Karlsson; Jennifer Bohl; Jessica Manning; Jose A Garcia-Rivera; Kraing Sidonn; Ly Sovann; Sophana Chea; Sreyngim Lay; Veasna Duong; Vireak Heang; Yi Sengdoeurn |
| EPI_ISL_3118374                                                                                                                                                                                                                                                                                                                                                                                                                                                                                                                                                                 | Kampomg Thom Rapid Response Team                                                                                                                                                                                                                              | Virology Unit, Institut Pasteur du Cambodge                                                                                                                                                                               | Cecile Troupin; Chau Darapheak; Chin Savuth; Erik A Karlsson; Kraing Sidonn; Leakhena Pum; Ly Sovann; Sophoannadeth Rath; Veasna Duong; Yi Sengdoeurn                                               |
| EPI_ISL_2231570, EPI_ISL_2231571, EPI_ISL_2231572, EPI_ISL_2343227, EPI_ISL_2608421, EPI_ISL_2801896, EPI_ISL_2801897, EPI_ISL_3031485, EPI_ISL_3031486, EPI_ISL_3031487, EPI_ISL_3031488, EPI_ISL_3118373                                                                                                                                                                                                                                                                                                                                                                      | see above                                                                                                                                                                                                                                                     | Kampong Cham Rapid Response Team                                                                                                                                                                                          | Cecile Troupin; Chau Darapheak; Chin Savuth; Erik A Karlsson; Jurre Y Siegers; Kraing Sidonn; Leakhena Pum; Ly Sovann; Sophoannadeth Rath; Veasna Duong; Yi Sengdoeurn                              |
| EPI_ISL_3797869                                                                                                                                                                                                                                                                                                                                                                                                                                                                                                                                                                 | Kampong Speu Rapid Response Team                                                                                                                                                                                                                              | Virology Unit, Institut Pasteur du Cambodge                                                                                                                                                                               | Cecile Troupin; Chau Darapheak; Chin Savuth; Erik A Karlsson; Jurre Y Siegers; Kraing Sidonn; Leakhena Pum; Ly Sovann; Sophoannadeth Rath; Veasna Duong; Yi Sengdoeurn                              |
| EPI_ISL_2343228, EPI_ISL_3031489, EPI_ISL_3570914                                                                                                                                                                                                                                                                                                                                                                                                                                                                                                                               | Kampong Thom Rapid Response Team                                                                                                                                                                                                                              | Virology Unit, Institut Pasteur du Cambodge                                                                                                                                                                               | Cecile Troupin; Chau Darapheak; Chin Savuth; Erik A Karlsson; Jurre Y Siegers; Kraing Sidonn; Leakhena Pum; Ly Sovann; Sophoannadeth Rath; Veasna Duong; Yi Sengdoeurn                              |
| EPI_ISL_2343250, EPI_ISL_2608444                                                                                                                                                                                                                                                                                                                                                                                                                                                                                                                                                | Kampot Rapid Response Team                                                                                                                                                                                                                                    | Virology Unit, Institut Pasteur du Cambodge                                                                                                                                                                               | Cecile Troupin; Chau Darapheak; Chin Savuth; Erik A Karlsson; Jurre Y Siegers; Kraing Sidonn; Leakhena Pum; Ly Sovann; Veasna Duong; Yi Sengdoeurn                                                  |
| EPI_ISL_2343249, EPI_ISL_3570942, EPI_ISL_3570944                                                                                                                                                                                                                                                                                                                                                                                                                                                                                                                               | Kandal Rapid Response Team                                                                                                                                                                                                                                    | Virology Unit, Institut Pasteur du Cambodge                                                                                                                                                                               | Cecile Troupin; Chau Darapheak; Chin Savuth; Erik A Karlsson; Jurre Y Siegers; Kraing Sidonn; Leakhena Pum; Ly Sovann; Sophoannadeth Rath; Veasna Duong; Yi Sengdoeurn                              |
| EPI_ISL_2547286                                                                                                                                                                                                                                                                                                                                                                                                                                                                                                                                                                 | LMVR, Characterization of febrile disease landscape in Cambodia via metagenomic pathogen sequencing                                                                                                                                                           | LMVR, Characterization of febrile disease landscape in Cambodia via metagenomic pathogen sequencing                                                                                                                       | Bohi; J.A.; J.E.; Lay; Manning; S. and Chea, S.                                                                                                                                                     |
| EPI_ISL_3983677                                                                                                                                                                                                                                                                                                                                                                                                                                                                                                                                                                 | Mondulkiri Rapid Response Team                                                                                                                                                                                                                                | Virology Unit, Institut Pasteur du Cambodge                                                                                                                                                                               | Cecile Troupin; Chau Darapheak; Chin Savuth; Erik A Karlsson; Kraing Sidonn; Leakhena Pum; Ly Sovann; Sophoannadeth Rath; Veasna Duong; Yi Sengdoeurn                                               |
| EPI_ISL_3031556, EPI_ISL_3031557, EPI_ISL_3031558                                                                                                                                                                                                                                                                                                                                                                                                                                                                                                                               | National Institute of Public Health                                                                                                                                                                                                                           | Virology Unit, Institut Pasteur du Cambodge                                                                                                                                                                               | Cecile Troupin; Chau Darapheak; Chin Savuth; Erik A Karlsson; Kraing Sidonn; Leakhena Pum; Ly Sovann; Sophoannadeth Rath; Veasna Duong; Yi Sengdoeurn                                               |
| EPI_ISL_2343229, EPI_ISL_2343230, EPI_ISL_2406461, EPI_ISL_2501031, EPI_ISL_2501032, EPI_ISL_2801899, EPI_ISL_2801900, EPI_ISL_2801901, EPI_ISL_2801902, EPI_ISL_2801903, EPI_ISL_3031490, EPI_ISL_3031491, EPI_ISL_3031492, EPI_ISL_3031493, EPI_ISL_3031494, EPI_ISL_3031495, EPI_ISL_3031496, EPI_ISL_3031497, EPI_ISL_3031498, EPI_ISL_3031499, EPI_ISL_3031500, EPI_ISL_3031501, EPI_ISL_3031502, EPI_ISL_3031503, EPI_ISL_3045565, EPI_ISL_3570877, EPI_ISL_3570879, EPI_ISL_3570882, EPI_ISL_3570884, EPI_ISL_3570916, EPI_ISL_3797872, EPI_ISL_3797873, EPI_ISL_3797874 | see above                                                                                                                                                                                                                                                     | Oddar Meanchey Rapid Response Team                                                                                                                                                                                        | Cecile Troupin; Chau Darapheak; Chin Savuth; Erik A Karlsson; Jurre Y Siegers; Kraing Sidonn; Leakhena Pum; Ly Sovann; Sophoannadeth Rath; Veasna Duong; Yi Sengdoeurn                              |
| EPI_ISL_3118378, EPI_ISL_3118379, EPI_ISL_3118380, EPI_ISL_3118381, EPI_ISL_3118382, EPI_ISL_3118383                                                                                                                                                                                                                                                                                                                                                                                                                                                                            | Oddat Meanchey Rapid Response Team                                                                                                                                                                                                                            | Virology Unit, Institut Pasteur du Cambodge                                                                                                                                                                               | Cecile Troupin; Chau Darapheak; Chin Savuth; Erik A Karlsson; Kraing Sidonn; Leakhena Pum; Ly Sovann; Sophoannadeth Rath; Veasna Duong; Yi Sengdoeurn                                               |
| EPI_ISL_1040028, EPI_ISL_1040029, EPI_ISL_1040030                                                                                                                                                                                                                                                                                                                                                                                                                                                                                                                               | Original detection - Virology Unit, Institut Pasteur du Cambodge; Sequencing - US National Institute of Allergy and Infectious Diseases Cambodia                                                                                                              | Virology Unit, Institut Pasteur du Cambodge                                                                                                                                                                               | Chau Darapheak; Chin Savuth; Erik A Karlsson; Jennifer Bohl; Jessica Manning; Kraing Sidonn; Ly Sovann; Sophana Chea; Sreyngim Lay; Veasna Duong; Yi Sengdoeurn                                     |
| EPI_ISL_3031559, EPI_ISL_3031560, EPI_ISL_3045603, EPI_ISL_3118375, EPI_ISL_3118376, EPI_ISL_3118377, EPI_ISL_3118408, EPI_ISL_3118409, EPI_ISL_3118410, EPI_ISL_3118411, EPI_ISL_3188253, EPI_ISL_3188254, EPI_ISL_3188255, EPI_ISL_3188256, EPI_ISL_3188257, EPI_ISL_3188258, EPI_ISL_3188259                                                                                                                                                                                                                                                                                 | see above                                                                                                                                                                                                                                                     | Pailin Rapid Response Team                                                                                                                                                                                                | Cecile Troupin; Chau Darapheak; Chin Savuth; Erik A Karlsson; Jurre Y Siegers; Kraing Sidonn; Leakhena Pum; Ly Sovann; Sophoannadeth Rath; Veasna Duong; Yi Sengdoeurn                              |
| EPI_ISL_3188230                                                                                                                                                                                                                                                                                                                                                                                                                                                                                                                                                                 | Phnom Penh Rapid Response Team                                                                                                                                                                                                                                | Virology Unit, Institut Pasteur du Cambodge                                                                                                                                                                               | Cecile Troupin; Chau Darapheak; Chin Savuth; Erik A Karlsson; Jurre Y Siegers; Kraing Sidonn; Leakhena Pum; Ly Sovann; Sophoannadeth Rath; Veasna Duong; Yi Sengdoeurn                              |
| EPI_ISL_3570940, EPI_ISL_3983678                                                                                                                                                                                                                                                                                                                                                                                                                                                                                                                                                | Preah Vihear Rapid Response Team                                                                                                                                                                                                                              | Virology Unit, Institut Pasteur du Cambodge                                                                                                                                                                               | Cecile Troupin; Chau Darapheak; Chin Savuth; Erik A Karlsson; Jurre Y Siegers; Kraing Sidonn; Leakhena Pum; Ly Sovann; Sophoannadeth Rath; Veasna Duong; Yi Sengdoeurn                              |
| EPI_ISL_3118406, EPI_ISL_3118407                                                                                                                                                                                                                                                                                                                                                                                                                                                                                                                                                | Prey Veng Rapid Response Team                                                                                                                                                                                                                                 | Virology Unit, Institut Pasteur du Cambodge                                                                                                                                                                               | Cecile Troupin; Chau Darapheak; Chin Savuth; Erik A Karlsson; Kraing Sidonn; Leakhena Pum; Ly Sovann; Sophoannadeth Rath; Veasna Duong; Yi Sengdoeurn                                               |
| EPI_ISL_2801898                                                                                                                                                                                                                                                                                                                                                                                                                                                                                                                                                                 | Pursat Rapid Response Team                                                                                                                                                                                                                                    | Virology Unit, Institut Pasteur du Cambodge                                                                                                                                                                               | Cecile Troupin; Chau Darapheak; Chin Savuth; Erik A Karlsson; Jurre Y Siegers; Kraing Sidonn; Leakhena Pum; Ly Sovann; Veasna Duong; Yi Sengdoeurn                                                  |
| EPI_ISL_3570912                                                                                                                                                                                                                                                                                                                                                                                                                                                                                                                                                                 | Rattanakiri Rapid Response Team                                                                                                                                                                                                                               | Virology Unit, Institut Pasteur du Cambodge                                                                                                                                                                               | Cecile Troupin; Chau Darapheak; Chin Savuth; Erik A Karlsson; Jurre Y Siegers; Kraing Sidonn; Leakhena Pum; Ly Sovann; Sophoannadeth Rath; Veasna Duong; Yi Sengdoeurn                              |
| EPI_ISL_682298                                                                                                                                                                                                                                                                                                                                                                                                                                                                                                                                                                  | Respiratory virus Laboratory, Chinese Academy of Medical Science                                                                                                                                                                                              | Respiratory virus Laboratory, Chinese Academy of Medical Science                                                                                                                                                          | Chen; Li, J.; Y. and Liu, L.; Zhen, H.                                                                                                                                                              |
| EPI_ISL_2106234, EPI_ISL_2106235, EPI_ISL_2106238, EPI_ISL_2106239, EPI_ISL_2106240, EPI_ISL_2106241, EPI_ISL_2106242, EPI_ISL_2106272                                                                                                                                                                                                                                                                                                                                                                                                                                          | see above                                                                                                                                                                                                                                                     | Siem Reap Provincial Laboratory                                                                                                                                                                                           | Cecile Troupin; Chau Darapheak; Chin Savuth; Erik A Karlsson; Jurre Y Siegers; Kraing Sidonn; Lamleav Leak; Leakhena Pum; Ly Sovann; Veasna Duong; Yi Sengdoeurn                                    |
| EPI_ISL_2501029, EPI_ISL_2501030, EPI_ISL_2608422, EPI_ISL_2608423                                                                                                                                                                                                                                                                                                                                                                                                                                                                                                              | Siem Reap Provincial Laboratory                                                                                                                                                                                                                               | Virology Unit, Institut Pasteur du Cambodge                                                                                                                                                                               | Cecile Troupin; Chau Darapheak; Chin Savuth; Erik A Karlsson; Jurre Y Siegers; Kraing Sidonn; Leakhena Pum; Ly Sovann; Veasna Duong; Yi Sengdoeurn                                                  |
| EPI_ISL_3983676                                                                                                                                                                                                                                                                                                                                                                                                                                                                                                                                                                 | Siem Reap Rapid Response Team                                                                                                                                                                                                                                 | Virology Unit, Institut Pasteur du Cambodge                                                                                                                                                                               | Cecile Troupin; Chau Darapheak; Chin Savuth; Erik A Karlsson; Jurre Y Siegers; Kraing Sidonn; Leakhena Pum; Ly Sovann; Sophoannadeth Rath; Veasna Duong; Yi Sengdoeurn                              |
| EPI_ISL_3570886, EPI_ISL_3570887, EPI_ISL_3570918, EPI_ISL_3570920, EPI_ISL_3570922, EPI_ISL_3797870                                                                                                                                                                                                                                                                                                                                                                                                                                                                            | Siem Reap Regional Laboratory                                                                                                                                                                                                                                 | Virology Unit, Institut Pasteur du Cambodge                                                                                                                                                                               | Cecile Troupin; Chau Darapheak; Chin Savuth; Erik A Karlsson; Jurre Y Siegers; Kraing Sidonn; Leakhena Pum; Ly Sovann; Sophoannadeth Rath; Veasna Duong; Yi Sengdoeurn                              |
| EPI_ISL_3797871                                                                                                                                                                                                                                                                                                                                                                                                                                                                                                                                                                 | Steung Treng Rapid Response Team                                                                                                                                                                                                                              | Virology Unit, Institut Pasteur du Cambodge                                                                                                                                                                               | Cecile Troupin; Chau Darapheak; Chin Savuth; Erik A Karlsson; Jurre Y Siegers; Kraing Sidonn; Leakhena Pum; Ly Sovann; Sophoannadeth Rath; Veasna Duong; Yi Sengdoeurn                              |
| EPI_ISL_2406465, EPI_ISL_2406466,                                                                                                                                                                                                                                                                                                                                                                                                                                                                                                                                               | Svay Rieng Rapid Response Team                                                                                                                                                                                                                                | Virology Unit, Institut Pasteur du Cambodge                                                                                                                                                                               | Cecile Troupin; Chau Darapheak; Chin Savuth; Erik A Karlsson; Jurre Y Siegers; Kraing Sidonn; Leakhena Pum; Ly Sovann;                                                                              |
